# Supplementary material for: Transcriptome of Subcutaneous Adipose Tissue reflect Membrane Dysfunction and Impaired Oxidative Processes in T2D across Heterogenous Populations
Source: Research Square preprint supplement (doi:10.21203/rs.3.rs-7053974/v1), 2025-11-14
Supplement: Supplementary file 1 [file 2642fd5283759a182a796303.xlsx]

## Sheet: Gene names and Protein names
Gene symbols	Association ID	Ensemble ID	Protein names
A1CF	11745515_a_at	ENSG00000148584	APOBEC1 complementation factor
ABCA6	11739904_a_at	ENSG00000154262	ATP binding cassette subfamily A member 6
ABCA8	11749097_a_at	ENSG00000141338	ATP binding cassette subfamily A member 8
ABCC4	11719632_a_at	ENSG00000125257	ATP binding cassette subfamily C member 4
ABI1	11743379_a_at	ENSG00000136754	abl interactor 1
ABI1	11745519_a_at	ENSG00000136754	abl interactor 1
ABI1	11745521_x_at	ENSG00000136754	abl interactor 1
ACIN1	11750382_a_at	ENSG00000100813	apoptotic chromatin condensation inducer 1
ACOX3	11737303_a_at	ENSG00000087008	acyl-CoA oxidase 3, pristanoyl
ACP3	11739049_at	ENSG00000014257	acid phosphatase 3
ACSS1	11755873_a_at	ENSG00000154930	acyl-CoA synthetase short chain family member 1
ADAM17	11731109_a_at	ENSG00000151694	ADAM metallopeptidase domain 17
ADAM23	11736770_a_at	ENSG00000114948	ADAM metallopeptidase domain 23
ADAMTSL2	11730124_s_at	ENSG00000197859	ADAMTS like 2
ADAMTSL2	11730125_x_at	ENSG00000197859	ADAMTS like 2
ADAR	11741719_a_at	ENSG00000160710	adenosine deaminase RNA specific
ADCY1	11722266_at	ENSG00000164742	adenylate cyclase 1
ADD1	11716514_s_at	ENSG00000087274	adducin 1
ADGRE2	11735191_a_at	ENSG00000127507	adhesion G protein-coupled receptor E2
ADGRF1	11731538_a_at	ENSG00000153292	adhesion G protein-coupled receptor F1
ADPRH	11751283_a_at	ENSG00000144843	ADP-ribosylarginine hydrolase
AFF3	11739696_s_at	ENSG00000144218	ALF transcription elongation factor 3
AFTPH	11726700_a_at	ENSG00000119844	aftiphilin
AGO1	11720866_a_at	ENSG00000092847	argonaute RISC component 1
AGPS	11748486_a_at	ENSG00000018510	alkylglycerone phosphate synthase
AIM2	11730458_at	ENSG00000163568	absent in melanoma 2
AKAP10	11739361_a_at	ENSG00000108599	A-kinase anchoring protein 10
AKAP13	11722594_at	ENSG00000170776	A-kinase anchoring protein 13
AKR1B10	11724488_at	ENSG00000198074	aldo-keto reductase family 1 member B10
ALDH4A1	11755618_a_at	ENSG00000159423	aldehyde dehydrogenase 4 family member A1
ALOX15B	11734618_a_at	ENSG00000179593	arachidonate 15-lipoxygenase type B
ALOX15B	11752283_a_at	ENSG00000179593	arachidonate 15-lipoxygenase type B
AMBP	11747103_a_at	ENSG00000106927	alpha-1-microglobulin/bikunin precursor
AMPD1	11730365_at	ENSG00000116748	adenosine monophosphate deaminase 1
AMPD3	11734064_a_at	ENSG00000133805	adenosine monophosphate deaminase 3
AMPD3	11739419_a_at	ENSG00000133805	adenosine monophosphate deaminase 3
AMPD3	11741184_a_at	ENSG00000133805	adenosine monophosphate deaminase 3
AMPD3	11758009_s_at	ENSG00000133805	adenosine monophosphate deaminase 3
ANK1	11741071_a_at	ENSG00000029534	ankyrin 1
ANK2	11745539_a_at	ENSG00000145362	ankyrin 2
ANK2	11748364_a_at	ENSG00000145362	ankyrin 2
ANKFY1	11739245_a_at	ENSG00000185722	ankyrin repeat and FYVE domain containing 1
ANKRD11	11727065_s_at	ENSG00000167522	ankyrin repeat domain containing 11
ANKRD11P2	11727065_s_at	ENSG00000231686	ANKRD11 pseudogene 2
ANKRD12	11751384_a_at	ENSG00000101745	ankyrin repeat domain 12
ANKS4B	11737258_x_at	ENSG00000175311	ankyrin repeat and sterile alpha motif domain containing 4B
ANKZF1	11756442_a_at	ENSG00000163516	ankyrin repeat and zinc finger peptidyl tRNA hydrolase 1
ANPEP	11746965_a_at	ENSG00000166825	alanyl aminopeptidase, membrane
ANXA13	11732637_a_at	ENSG00000104537	annexin A13
ANXA13	11741559_a_at	ENSG00000104537	annexin A13
AP2M1	11747195_x_at	ENSG00000161203	adaptor related protein complex 2 subunit mu 1
AP3M2	11749931_s_at	ENSG00000070718	adaptor related protein complex 3 subunit mu 2
APC	11757692_s_at	ENSG00000134982	APC regulator of WNT signaling pathway
APCDD1L	11730423_a_at	ENSG00000198768	APC down-regulated 1 like
APCS	11727405_a_at	ENSG00000132703	amyloid P component, serum
APH1A	11744723_a_at	ENSG00000117362	aph-1 homolog A, gamma-secretase subunit
APH1B	11756680_a_at	ENSG00000138613	aph-1 homolog B, gamma-secretase subunit
API5	11758459_s_at	ENSG00000166181	apoptosis inhibitor 5
APOBEC3C	11723956_x_at	ENSG00000244509	apolipoprotein B mRNA editing enzyme catalytic subunit 3C
APOBEC3C	11758897_at	ENSG00000244509	apolipoprotein B mRNA editing enzyme catalytic subunit 3C
APOBEC3C	11758898_x_at	ENSG00000244509	apolipoprotein B mRNA editing enzyme catalytic subunit 3C
APOBEC3F	11741257_x_at	ENSG00000128394	apolipoprotein B mRNA editing enzyme catalytic subunit 3F
APOL1	11745189_a_at	ENSG00000100342	apolipoprotein L1
APOL1	11751619_a_at	ENSG00000100342	apolipoprotein L1
AQP2	11729929_a_at	ENSG00000167580	aquaporin 2
AQP5	11721531_a_at	ENSG00000161798	aquaporin 5
AQR	11759408_at	ENSG00000021776	aquarius intron-binding spliceosomal factor
ARHGAP15	11749445_a_at	ENSG00000075884	Rho GTPase activating protein 15
ARHGAP26	11740507_a_at	ENSG00000145819	Rho GTPase activating protein 26
ARHGAP26	11740508_s_at	ENSG00000145819	Rho GTPase activating protein 26
ARHGAP26	11743506_a_at	ENSG00000145819	Rho GTPase activating protein 26
ARHGAP4	11744450_x_at	ENSG00000089820	Rho GTPase activating protein 4
ARHGAP45	11723537_a_at	ENSG00000180448	Rho GTPase activating protein 45
ARHGEF1	11743009_x_at	ENSG00000076928	Rho guanine nucleotide exchange factor 1
ARID1A	11719857_a_at	ENSG00000117713	AT-rich interaction domain 1A
ARID1A	11719858_a_at	ENSG00000117713	AT-rich interaction domain 1A
ARID1A	11742019_a_at	ENSG00000117713	AT-rich interaction domain 1A
ARID1A	11755436_x_at	ENSG00000117713	AT-rich interaction domain 1A
ASAP1	11717283_a_at	ENSG00000153317	ArfGAP with SH3 domain, ankyrin repeat and PH domain 1
ASB13	11754377_a_at	ENSG00000196372	ankyrin repeat and SOCS box containing 13
ASB7	11723870_at	ENSG00000183475	ankyrin repeat and SOCS box containing 7
ASXL2	11757756_s_at	ENSG00000143970	ASXL transcriptional regulator 2
ATG14	11725489_x_at	ENSG00000126775	autophagy related 14
ATM	11741374_x_at	ENSG00000149311	ATM serine/threonine kinase
ATM	11745546_a_at	ENSG00000149311	ATM serine/threonine kinase
ATP10D	11739490_a_at	ENSG00000145246	ATPase phospholipid transporting 10D (putative)
ATP13A5	11715203_s_at	ENSG00000187527	ATPase 13A5
ATP1A2	11719659_x_at	ENSG00000018625	ATPase Na+/K+ transporting subunit alpha 2
ATP1A2	11747674_a_at	ENSG00000018625	ATPase Na+/K+ transporting subunit alpha 2
ATP6V1G2-DDX39B	11715528_a_at	ENSG00000254870	ATP6V1G2-DDX39B readthrough (NMD candidate)
ATP6V1G2-DDX39B	11715529_x_at	ENSG00000254870	ATP6V1G2-DDX39B readthrough (NMD candidate)
ATRX	11721718_a_at	ENSG00000085224	ATRX chromatin remodeler
ATXN2	11718601_a_at	ENSG00000204842	ataxin 2
ATXN2L	11750259_x_at	ENSG00000168488	ataxin 2 like
ATXN3L	11740566_at	ENSG00000123594	ataxin 3 like
ATXN7	11744609_a_at	ENSG00000163635	ataxin 7
BACH2	11741378_s_at	ENSG00000112182	BTB domain and CNC homolog 2
BBS9	11750619_a_at	ENSG00000122507	Bardet-Biedl syndrome 9
BBX	11720656_a_at	ENSG00000114439	BBX high mobility group box domain containing
BCAP29	11722590_s_at	ENSG00000075790	B cell receptor associated protein 29
BCLAF1	11758404_s_at	ENSG00000029363	BCL2 associated transcription factor 1
BHLHE41	11746930_a_at	ENSG00000123095	basic helix-loop-helix family member e41
BHLHE41	11758031_s_at	ENSG00000123095	basic helix-loop-helix family member e41
BIRC3	11722851_at	ENSG00000023445	baculoviral IAP repeat containing 3
BIVM-ERCC5	11752129_a_at	ENSG00000270181	BIVM-ERCC5 readthrough
BLK	11727346_a_at	ENSG00000136573	BLK proto-oncogene, Src family tyrosine kinase
BMF	11737440_a_at	ENSG00000104081	Bcl2 modifying factor
BRD2	11719630_a_at	ENSG00000204256	bromodomain containing 2
BRD4	11754395_a_at	ENSG00000141867	bromodomain containing 4
BSDC1	11737964_x_at	ENSG00000160058	BSD domain containing 1
BST2	11716035_at	ENSG00000130303	bone marrow stromal cell antigen 2
BST2	11716036_x_at	ENSG00000130303	bone marrow stromal cell antigen 2
BTLA	11735222_a_at	ENSG00000186265	B and T lymphocyte associated
BTN2A1	11747874_x_at	ENSG00000112763	butyrophilin subfamily 2 member A1
BTN2A2	11752766_x_at	ENSG00000124508	butyrophilin subfamily 2 member A2
BUB3	11721803_a_at	ENSG00000154473	BUB3 mitotic checkpoint protein
C12orf40	11734474_at	ENSG00000180116	chromosome 12 open reading frame 40
C16orf82	11727399_at	ENSG00000234186	chromosome 16 open reading frame 82
C1orf198	11741655_a_at	ENSG00000119280	chromosome 1 open reading frame 198
C1orf198	11754953_a_at	ENSG00000119280	chromosome 1 open reading frame 198
C1QTNF9B	11737567_x_at	ENSG00000205863	C1q and TNF related 9B
C2CD3	11729452_a_at	ENSG00000168014	C2 domain containing 3 centriole elongation regulator
C6orf62	11751713_a_at	ENSG00000112308	chromosome 6 open reading frame 62
C6orf89	11718699_at	ENSG00000198663	chromosome 6 open reading frame 89
C7	11717978_at	ENSG00000112936	complement C7
C9orf153	11738369_a_at	ENSG00000187753	chromosome 9 open reading frame 153
C9orf153	11760704_at	ENSG00000187753	chromosome 9 open reading frame 153
CAB39L	11723516_a_at	ENSG00000102547	calcium binding protein 39 like
CAB39L	11723517_a_at	ENSG00000102547	calcium binding protein 39 like
CACNA2D4	11726930_x_at	ENSG00000151062	calcium voltage-gated channel auxiliary subunit alpha2delta 4
CAMK1D	11740661_at	ENSG00000183049	calcium/calmodulin dependent protein kinase ID
CAMKK2	11729541_a_at	ENSG00000110931	calcium/calmodulin dependent protein kinase kinase 2
CAMKK2	11729542_a_at	ENSG00000110931	calcium/calmodulin dependent protein kinase kinase 2
CARTPT	11729791_at	ENSG00000164326	CART prepropeptide
CASP10	11742104_a_at	ENSG00000003400	caspase 10
CASP8	11742324_a_at	ENSG00000064012	caspase 8
CASQ1	11723676_at	ENSG00000143318	calsequestrin 1
CBLIF	11748336_a_at	ENSG00000134812	cobalamin binding intrinsic factor
CBLN3	11731150_at	ENSG00000139899	cerebellin 3 precursor
CCDC150	11748933_a_at	ENSG00000144395	coiled-coil domain containing 150
CCDC159	11762917_at	ENSG00000183401	coiled-coil domain containing 159
CCDC191	11721988_at	ENSG00000163617	coiled-coil domain containing 191
CCL22	11731706_at	ENSG00000102962	C-C motif chemokine ligand 22
CCNG2	11726626_at	ENSG00000138764	cyclin G2
CCR6	11736621_a_at	ENSG00000112486	C-C motif chemokine receptor 6
CCR6	11752105_x_at	ENSG00000112486	C-C motif chemokine receptor 6
CD1C	11728782_at	ENSG00000158481	CD1c molecule
CD200R1	11738915_x_at	ENSG00000163606	CD200 receptor 1
CD22	11754830_a_at	ENSG00000012124	CD22 molecule
CD276	11749694_a_at	ENSG00000103855	CD276 molecule
CD34	11751368_a_at	ENSG00000174059	CD34 molecule
CD40	11731818_a_at	ENSG00000101017	CD40 molecule
CD40LG	11735105_a_at	ENSG00000102245	CD40 ligand
CD44	11715915_a_at	ENSG00000026508	CD44 molecule (Indian blood group)
CD47	11735329_a_at	ENSG00000196776	CD47 molecule
CD72	11744567_a_at	ENSG00000137101	CD72 molecule
CDC42EP1	11722206_x_at	ENSG00000128283	CDC42 effector protein 1
CDC5L	11719080_a_at	ENSG00000096401	cell division cycle 5 like
CDK10	11761006_x_at	ENSG00000185324	cyclin dependent kinase 10
CDKL3	11748555_a_at	ENSG00000006837	cyclin dependent kinase like 3
CDX1	11732513_a_at	ENSG00000113722	caudal type homeobox 1
CEACAM21	11732867_a_at	ENSG00000007129	CEA cell adhesion molecule 21
CELA2B	11718014_a_at	ENSG00000215704	chymotrypsin like elastase 2B
CELF1	11763403_a_at	ENSG00000149187	CUGBP Elav-like family member 1
CELF2	11753149_a_at	ENSG00000048740	CUGBP Elav-like family member 2
CELF2	11753315_a_at	ENSG00000048740	CUGBP Elav-like family member 2
CELSR1	11756800_a_at	ENSG00000075275	cadherin EGF LAG seven-pass G-type receptor 1
CENPBD1P	11728338_a_at	ENSG00000177946	CENPB DNA-binding domain containing 1, pseudogene
CENPBD1P	11728338_a_at	ENSG00000293473	CENPB DNA-binding domain containing 1, pseudogene
CEP128	11749417_a_at	ENSG00000100629	centrosomal protein 128
CEP57	11759670_a_at	ENSG00000166037	centrosomal protein 57
CEP68	11730776_s_at	ENSG00000011523	centrosomal protein 68
CEP68	11730777_a_at	ENSG00000011523	centrosomal protein 68
CEP68	11752311_x_at	ENSG00000011523	centrosomal protein 68
CEP68	11754555_x_at	ENSG00000011523	centrosomal protein 68
CEP68	11757453_s_at	ENSG00000011523	centrosomal protein 68
CES2	11728677_a_at	ENSG00000172831	carboxylesterase 2
CFAP97	11743188_a_at	ENSG00000164323	cilia and flagella associated protein 97
CFLAR	11746300_x_at	ENSG00000003402	CASP8 and FADD like apoptosis regulator
CFLAR	11753252_a_at	ENSG00000003402	CASP8 and FADD like apoptosis regulator
CHD9	11745269_s_at	ENSG00000177200	chromodomain helicase DNA binding protein 9
CHERP	11747199_a_at	ENSG00000085872	calcium homeostasis endoplasmic reticulum protein
CHMP1A	11716599_s_at	ENSG00000131165	charged multivesicular body protein 1A
CHRDL2	11734522_a_at	ENSG00000054938	chordin like 2
CHST11	11759496_at	ENSG00000171310	carbohydrate sulfotransferase 11
CIB2	11747168_a_at	ENSG00000136425	calcium and integrin binding family member 2
CINP	11763507_at	ENSG00000100865	cyclin dependent kinase 2 interacting protein
CIZ1	11729525_x_at	ENSG00000148337	CDKN1A interacting zinc finger protein 1
CKAP5	11747415_a_at	ENSG00000175216	cytoskeleton associated protein 5
CLIC2	11734784_a_at	ENSG00000155962	chloride intracellular channel 2
CLIP3	11718473_a_at	ENSG00000105270	CAP-Gly domain containing linker protein 3
CLPTM1	11746127_a_at	ENSG00000104853	CLPTM1 regulator of GABA type A receptor forward trafficking
CLPX	11763746_a_at	ENSG00000166855	caseinolytic mitochondrial matrix peptidase chaperone subunit X
CNNM4	11720254_a_at	ENSG00000158158	cyclin and CBS domain divalent metal cation transport mediator 4
CNOT2	11734937_a_at	ENSG00000111596	CCR4-NOT transcription complex subunit 2
CNOT2	11757803_x_at	ENSG00000111596	CCR4-NOT transcription complex subunit 2
CNTRL	11723378_a_at	ENSG00000119397	centriolin
CNTRL	11747135_x_at	ENSG00000119397	centriolin
COCH	11747123_a_at	ENSG00000100473	cochlin
COL1A1	11760635_at	ENSG00000108821	collagen type I alpha 1 chain
COL4A6	11750015_a_at	ENSG00000197565	collagen type IV alpha 6 chain
COL6A1	11715403_a_at	ENSG00000142156	collagen type VI alpha 1 chain
COPE	11741238_a_at	ENSG00000105669	COPI coat complex subunit epsilon
COPS7A	11744338_a_at	ENSG00000111652	COP9 signalosome subunit 7A
COQ4	11761225_a_at	ENSG00000167113	coenzyme Q4
CORO2A	11723391_a_at	ENSG00000106789	coronin 2A
CPSF1	11720093_at	ENSG00000071894	cleavage and polyadenylation specific factor 1
CPSF7	11739096_s_at	ENSG00000149532	cleavage and polyadenylation specific factor 7
CRACDL	11724393_at	ENSG00000196872	CRACD like
CREB3L2	11744646_a_at	ENSG00000182158	cAMP responsive element binding protein 3 like 2
CREBRF	11744932_a_at	ENSG00000164463	CREB3 regulatory factor
CRIM1	11736230_a_at	ENSG00000150938	cysteine rich transmembrane BMP regulator 1
CRKL	11718993_at	ENSG00000099942	CRK like proto-oncogene, adaptor protein
CSAG1	11730715_x_at	ENSG00000198930	chondrosarcoma associated gene 1
CSF1R	11716993_a_at	ENSG00000182578	colony stimulating factor 1 receptor
CTF1	11726200_at	ENSG00000150281	cardiotrophin 1
CTLA4	11730637_a_at	ENSG00000163599	cytotoxic T-lymphocyte associated protein 4
CTNNB1	11748951_a_at	ENSG00000168036	catenin beta 1
CTNNB1	11749021_s_at	ENSG00000168036	catenin beta 1
CTNNB1	11750680_x_at	ENSG00000168036	catenin beta 1
CTR9	11717769_at	ENSG00000198730	CTR9 homolog, Paf1/RNA polymerase II complex component
CTSH	11757383_a_at	ENSG00000103811	cathepsin H
CXCL14	11717911_x_at	ENSG00000145824	C-X-C motif chemokine ligand 14
CXCL16	11756645_x_at	ENSG00000161921	C-X-C motif chemokine ligand 16
CXXC1	11756929_a_at	ENSG00000154832	CXXC finger protein 1
CYB561	11754284_s_at	ENSG00000008283	cytochrome b561
CYB5RL	11754602_a_at	ENSG00000215883	cytochrome b5 reductase like
CYLD	11723096_a_at	ENSG00000083799	CYLD lysine 63 deubiquitinase
CYP11B1	11734128_a_at	ENSG00000160882	cytochrome P450 family 11 subfamily B member 1
CYP2B6	11729454_x_at	ENSG00000197408	cytochrome P450 family 2 subfamily B member 6
CYP2C8	11747879_a_at	ENSG00000138115	cytochrome P450 family 2 subfamily C member 8
CYP2C9	11727471_a_at	ENSG00000138109	cytochrome P450 family 2 subfamily C member 9
CYP2U1	11723779_a_at	ENSG00000155016	cytochrome P450 family 2 subfamily U member 1
CYP2U1	11745402_a_at	ENSG00000155016	cytochrome P450 family 2 subfamily U member 1
D2HGDH	11755619_s_at	ENSG00000180902	D-2-hydroxyglutarate dehydrogenase
DBNL	11756792_x_at	ENSG00000136279	drebrin like
DBP	11752942_s_at	ENSG00000105516	D-box binding PAR bZIP transcription factor
DCC	11740102_at	ENSG00000187323	DCC netrin 1 receptor
DCLK2	11722350_a_at	ENSG00000170390	doublecortin like kinase 2
DCLK3	11734318_at	ENSG00000163673	doublecortin like kinase 3
DCP1A	11719470_a_at	ENSG00000272886	decapping mRNA 1A
DCX	11736197_a_at	ENSG00000077279	doublecortin
DDB1	11748413_s_at	ENSG00000167986	damage specific DNA binding protein 1
DDB2	11717397_a_at	ENSG00000134574	damage specific DNA binding protein 2
DDB2	11750080_a_at	ENSG00000134574	damage specific DNA binding protein 2
DDX23	11752973_a_at	ENSG00000174243	DEAD-box helicase 23
DDX39B	11715528_a_at	ENSG00000198563	DExD-box helicase 39B
DDX39B	11715529_x_at	ENSG00000198563	DExD-box helicase 39B
DENND11	11718566_s_at	ENSG00000257093	DENN domain containing 11
DENND1B	11740132_at	ENSG00000213047	DENN domain containing 1B
DGAT2L6	11741921_at	ENSG00000184210	diacylglycerol O-acyltransferase 2 like 6
DGLUCY	11744811_a_at	ENSG00000133943	D-glutamate cyclase
DHX38	11744451_a_at	ENSG00000140829	DEAH-box helicase 38
DIPK2A	11741630_a_at	ENSG00000181744	divergent protein kinase domain 2A
DMPK	11747031_a_at	ENSG00000104936	DM1 protein kinase
DNAJC5	11758906_at	ENSG00000101152	DnaJ heat shock protein family (Hsp40) member C5
DNAJC6	11745939_a_at	ENSG00000116675	DnaJ heat shock protein family (Hsp40) member C6
DOCK10	11746710_a_at	ENSG00000135905	dedicator of cytokinesis 10
DOK1	11731530_a_at	ENSG00000115325	docking protein 1
DOK1	11731531_x_at	ENSG00000115325	docking protein 1
DOK1	11747949_a_at	ENSG00000115325	docking protein 1
DOK3	11731586_at	ENSG00000146094	docking protein 3
DTNA	11729205_a_at	ENSG00000134769	dystrobrevin alpha
DUSP10	11751237_a_at	ENSG00000143507	dual specificity phosphatase 10
DUSP18	11730430_x_at	ENSG00000167065	dual specificity phosphatase 18
DZIP3	11732285_at	ENSG00000198919	DAZ interacting zinc finger protein 3
DZIP3	11749677_a_at	ENSG00000198919	DAZ interacting zinc finger protein 3
DAAM1	11755080_a_at	ENSG00000100592	dishevelled associated activator of morphogenesis 1
EAF1	11724306_at	ENSG00000144597	ELL associated factor 1
EDARADD	11733212_a_at	ENSG00000186197	EDAR associated via death domain
EDDM3A	11732623_at	ENSG00000181562	epididymal protein 3A
EDEM1	11722262_at	ENSG00000134109	ER degradation enhancing alpha-mannosidase like protein 1
EIF2AK1	11726991_s_at	ENSG00000086232	eukaryotic translation initiation factor 2 alpha kinase 1
ELMO1	11730852_x_at	ENSG00000155849	engulfment and cell motility 1
ELP3	11748260_a_at	ENSG00000134014	elongator acetyltransferase complex subunit 3
EMX1	11735490_a_at	ENSG00000135638	empty spiracles homeobox 1
ENDOU	11748287_a_at	ENSG00000111405	endonuclease, poly(U) specific
ENO1P1	11733212_a_at	ENSG00000244457	enolase 1 pseudogene 1
EOLA1-DT	11753194_s_at	ENSG00000241769	EOLA1 divergent transcript
EOLA2-DT	11753194_s_at	ENSG00000235703	EOLA2 divergent transcript
EPB41L1	11721168_a_at	ENSG00000088367	erythrocyte membrane protein band 4.1 like 1
EPB41L1	11740141_a_at	ENSG00000088367	erythrocyte membrane protein band 4.1 like 1
EPB41L2	11722358_a_at	ENSG00000079819	erythrocyte membrane protein band 4.1 like 2
EPB41L3	11747508_a_at	ENSG00000082397	erythrocyte membrane protein band 4.1 like 3
EPC1	11736740_a_at	ENSG00000120616	enhancer of polycomb homolog 1
EPN2	11735018_x_at	ENSG00000072134	epsin 2
EPN3	11745094_a_at	ENSG00000049283	epsin 3
EPS15	11719484_at	ENSG00000085832	epidermal growth factor receptor pathway substrate 15
EPS15	11719485_x_at	ENSG00000085832	epidermal growth factor receptor pathway substrate 15
EPS15	11756703_a_at	ENSG00000085832	epidermal growth factor receptor pathway substrate 15
EPS8	11717441_a_at	ENSG00000151491	epidermal growth factor receptor pathway substrate 8
ERAP1	11724602_a_at	ENSG00000164307	endoplasmic reticulum aminopeptidase 1
ERAP1	11727885_at	ENSG00000164307	endoplasmic reticulum aminopeptidase 1
ERAP1	11749003_a_at	ENSG00000164307	endoplasmic reticulum aminopeptidase 1
ERCC3	11756348_a_at	ENSG00000163161	ERCC excision repair 3, TFIIH core complex helicase subunit
ERCC5	11752129_a_at	ENSG00000134899	ERCC excision repair 5, endonuclease
ESR1	11756042_x_at	ENSG00000091831	estrogen receptor 1
ESRRG	11737691_a_at	ENSG00000196482	estrogen related receptor gamma
ESRRG	11749456_a_at	ENSG00000196482	estrogen related receptor gamma
ETV1	11747748_a_at	ENSG00000006468	ETS variant transcription factor 1
ETV5	11720352_at	ENSG00000244405	ETS variant transcription factor 5
ETV7	11750454_a_at	ENSG00000010030	ETS variant transcription factor 7
EXOC4	11718791_s_at	ENSG00000131558	exocyst complex component 4
EXOC7	11719770_a_at	ENSG00000182473	exocyst complex component 7
EZH1	11717324_at	ENSG00000108799	enhancer of zeste 1 polycomb repressive complex 2 subunit
F2R	11748678_a_at	ENSG00000181104	coagulation factor II thrombin receptor
FAF1	11716362_a_at	ENSG00000185104	Fas associated factor 1
FAM117A	11719147_at	ENSG00000121104	family with sequence similarity 117 member A
FAM120B	11762058_a_at	ENSG00000112584	family with sequence similarity 120B
FAM120B	11763267_a_at	ENSG00000112584	family with sequence similarity 120B
FAM169A	11743750_s_at	ENSG00000198780	family with sequence similarity 169 member A
FAM20B	11717970_at	ENSG00000116199	FAM20B glycosaminoglycan xylosylkinase
FAM81A	11746524_a_at	ENSG00000157470	family with sequence similarity 81 member A
FAM83A-AS1	11753146_a_at	ENSG00000204949	FAM83A antisense RNA 1
FAXDC2	11748570_a_at	ENSG00000170271	fatty acid hydroxylase domain containing 2
FAXDC2	11751501_a_at	ENSG00000170271	fatty acid hydroxylase domain containing 2
FAXDC2	11755573_s_at	ENSG00000170271	fatty acid hydroxylase domain containing 2
FBLN5	11743043_a_at	ENSG00000140092	fibulin 5
FBXO4	11736790_x_at	ENSG00000151876	F-box protein 4
FCAMR	11742917_a_at	ENSG00000162897	Fc alpha and mu receptor
FCER2	11756817_a_at	ENSG00000104921	Fc epsilon receptor II
FCGR2B	11726046_s_at	ENSG00000072694	Fc gamma receptor IIb
FCGR2B	11741517_s_at	ENSG00000072694	Fc gamma receptor IIb
FCGR2B	11741899_s_at	ENSG00000072694	Fc gamma receptor IIb
FCHO2	11749457_a_at	ENSG00000157107	FCH and mu domain containing endocytic adaptor 2
FCHSD1	11747190_a_at	ENSG00000197948	FCH and double SH3 domains 1
FCMR	11740200_a_at	ENSG00000162894	Fc mu receptor
FCRL2	11746620_x_at	ENSG00000132704	Fc receptor like 2
FCRL5	11763305_at	ENSG00000143297	Fc receptor like 5
FCRL5	11763306_x_at	ENSG00000143297	Fc receptor like 5
FCRLA	11731584_a_at	ENSG00000132185	Fc receptor like A
FERD3L	11732985_at	ENSG00000146618	Fer3 like bHLH transcription factor
FFAR1	11754830_a_at	ENSG00000126266	free fatty acid receptor 1
FGFR1	11747416_a_at	ENSG00000077782	fibroblast growth factor receptor 1
FHIT	11761684_a_at	ENSG00000189283	fragile histidine triad diadenosine triphosphatase
FIG4	11715265_at	ENSG00000112367	FIG4 phosphoinositide 5-phosphatase
FLI1	11723696_at	ENSG00000151702	Fli-1 proto-oncogene, ETS transcription factor
FMNL2	11752461_a_at	ENSG00000157827	formin like 2
FNBP1	11727111_a_at	ENSG00000187239	formin binding protein 1
FNBP4	11717945_a_at	ENSG00000109920	formin binding protein 4
FOXO3	11746523_x_at	ENSG00000118689	forkhead box O3
FOXO3	11749812_s_at	ENSG00000118689	forkhead box O3
FOXO3B	11746523_x_at	ENSG00000240445	forkhead box O3B
FOXO3B	11749812_s_at	ENSG00000240445	forkhead box O3B
FUCA1	11723641_a_at	ENSG00000179163	alpha-L-fucosidase 1
FUCA1	11755695_a_at	ENSG00000179163	alpha-L-fucosidase 1
FXYD2	11729732_x_at	ENSG00000137731	FXYD domain containing ion transport regulator 2
FXYD2	11753881_x_at	ENSG00000137731	FXYD domain containing ion transport regulator 2
FXYD6-FXYD2	11729732_x_at	ENSG00000255245	FXYD6-FXYD2 readthrough
FXYD6-FXYD2	11753881_x_at	ENSG00000255245	FXYD6-FXYD2 readthrough
GAB1	11741339_a_at	ENSG00000109458	GRB2 associated binding protein 1
GABRR3	11742290_at	ENSG00000183185	gamma-aminobutyric acid type A receptor subunit rho3
GALM	11731413_at	ENSG00000143891	galactose mutarotase
GALNT11	11751025_a_at	ENSG00000178234	polypeptide N-acetylgalactosaminyltransferase 11
GALNT13	11735081_at	ENSG00000144278	polypeptide N-acetylgalactosaminyltransferase 13
GAS6	11715551_s_at	ENSG00000183087	growth arrest specific 6
GAS6	11754440_s_at	ENSG00000183087	growth arrest specific 6
GATAD2B	11724894_at	ENSG00000143614	GATA zinc finger domain containing 2B
GATM	11716813_a_at	ENSG00000171766	glycine amidinotransferase
GBA1	11751099_x_at	ENSG00000177628	glucosylceramidase beta 1
GBA1	11753439_a_at	ENSG00000177628	glucosylceramidase beta 1
GBAP1	11751099_x_at	ENSG00000160766	glucosylceramidase beta pseudogene 1
GBAP1	11751099_x_at	ENSG00000291137	glucosylceramidase beta pseudogene 1
GBAP1	11753439_a_at	ENSG00000160766	glucosylceramidase beta pseudogene 1
GBAP1	11753439_a_at	ENSG00000291137	glucosylceramidase beta pseudogene 1
GC	11717587_a_at	ENSG00000145321	GC vitamin D binding protein
GFRA2	11749446_a_at	ENSG00000168546	GDNF family receptor alpha 2
GGA1	11736096_a_at	ENSG00000100083	golgi associated, gamma adaptin ear containing, ARF binding protein 1
GGA2	11722372_a_at	ENSG00000103365	golgi associated, gamma adaptin ear containing, ARF binding protein 2
GGA2	11722374_a_at	ENSG00000103365	golgi associated, gamma adaptin ear containing, ARF binding protein 2
GGA2	11722375_a_at	ENSG00000103365	golgi associated, gamma adaptin ear containing, ARF binding protein 2
GGNBP2	11747576_a_at	ENSG00000278311	gametogenetin binding protein 2
GGT5	11756254_a_at	ENSG00000099998	gamma-glutamyltransferase 5
GLG1	11736604_a_at	ENSG00000090863	golgi glycoprotein 1
GLI2	11751794_a_at	ENSG00000074047	GLI family zinc finger 2
GLS2	11753078_a_at	ENSG00000135423	glutaminase 2
GLYR1	11717027_a_at	ENSG00000140632	glyoxylate reductase 1 homolog
GM2A	11719921_s_at	ENSG00000196743	ganglioside GM2 activator
GM2A	11719922_a_at	ENSG00000196743	ganglioside GM2 activator
GM2A	11747178_x_at	ENSG00000196743	ganglioside GM2 activator
GNA12	11727847_a_at	ENSG00000146535	G protein subunit alpha 12
GOLM2	11751048_x_at	ENSG00000166734	golgi membrane protein 2
GOLPH3	11751253_a_at	ENSG00000113384	golgi phosphoprotein 3
GPBP1L1	11724757_a_at	ENSG00000159592	GC-rich promoter binding protein 1 like 1
GPR107	11717644_a_at	ENSG00000148358	G protein-coupled receptor 107
GRHL2	11731241_at	ENSG00000083307	grainyhead like transcription factor 2
GRIA4	11730475_a_at	ENSG00000152578	glutamate ionotropic receptor AMPA type subunit 4
GRM7	11735499_a_at	ENSG00000196277	glutamate metabotropic receptor 7
GSTM5	11742773_at	ENSG00000134201	glutathione S-transferase mu 5
H1-5	11738438_at	ENSG00000184357	H1.5 linker histone, cluster member
H2AC7	11738058_s_at	ENSG00000196866	H2A clustered histone 7
H2BC26	11732990_x_at	ENSG00000196890	H2B clustered histone 26
H3-7	11742410_s_at	ENSG00000273213	H3.7 histone (putative)
H3C13	11742410_s_at	ENSG00000183598	H3 clustered histone 13
H3C14	11742410_s_at	ENSG00000203811	H3 clustered histone 14
H3C15	11742410_s_at	ENSG00000203852	H3 clustered histone 15
H3P4	11742410_s_at	ENSG00000213244	H3 histone pseudogene 4
HCFC1	11721129_at	ENSG00000172534	host cell factor C1
HECTD4	11742413_a_at	ENSG00000173064	HECT domain E3 ubiquitin protein ligase 4
HERPUD1	11741510_a_at	ENSG00000051108	homocysteine inducible ER protein with ubiquitin like domain 1
HERPUD1	11749257_a_at	ENSG00000051108	homocysteine inducible ER protein with ubiquitin like domain 1
HEXD	11761090_a_at	ENSG00000169660	hexosaminidase D
HIC1	11760064_x_at	ENSG00000177374	HIC ZBTB transcriptional repressor 1
HIF1AN	11721870_s_at	ENSG00000166135	hypoxia inducible factor 1 subunit alpha inhibitor
HLA-DOA	11733870_at	ENSG00000204252	major histocompatibility complex, class II, DO alpha
HLA-DOB	11724163_at	ENSG00000241106	major histocompatibility complex, class II, DO beta
HLF	11724271_a_at	ENSG00000108924	HLF transcription factor, PAR bZIP family member
HLF	11724272_at	ENSG00000108924	HLF transcription factor, PAR bZIP family member
HNRNPCL2	11715261_s_at	ENSG00000275774	heterogeneous nuclear ribonucleoprotein C like 2
HNRNPCL3	11715261_s_at	ENSG00000277058	heterogeneous nuclear ribonucleoprotein C like 3
HNRNPCL4	11715261_s_at	ENSG00000179412	heterogeneous nuclear ribonucleoprotein C like 4
HNRNPD	11749303_s_at	ENSG00000138668	heterogeneous nuclear ribonucleoprotein D
HPX	11718783_a_at	ENSG00000110169	hemopexin
HUWE1	11717751_a_at	ENSG00000086758	HECT, UBA and WWE domain containing E3 ubiquitin protein ligase 1
HVCN1	11748526_a_at	ENSG00000122986	hydrogen voltage gated channel 1
HYDIN	11734269_a_at	ENSG00000157423	HYDIN axonemal central pair apparatus protein
HYDIN2	11734269_a_at	ENSG00000276975	HYDIN axonemal central pair apparatus protein 2 (pseudogene)
ICOS	11731360_a_at	ENSG00000163600	inducible T cell costimulator
IFFO1	11720551_a_at	ENSG00000010295	intermediate filament family orphan 1
IGFBP5	11728655_at	ENSG00000115461	insulin like growth factor binding protein 5
IGKV1-5	11763684_x_at	ENSG00000243466	immunoglobulin kappa variable 1-5
IGLV1-41	11763225_x_at	ENSG00000253818	immunoglobulin lambda variable 1-41 (pseudogene)
IGLV1-51	11763225_x_at	ENSG00000211644	immunoglobulin lambda variable 1-51
IL10RA	11729748_a_at	ENSG00000110324	interleukin 10 receptor subunit alpha
IL11RA	11737464_a_at	ENSG00000137070	interleukin 11 receptor subunit alpha
IL16	11758090_s_at	ENSG00000172349	interleukin 16
IL34	11726706_at	ENSG00000157368	interleukin 34
IL4I1	11732110_a_at	ENSG00000104951	interleukin 4 induced 1
IL7R	11751647_a_at	ENSG00000168685	interleukin 7 receptor
INMT-MINDY4	11734566_a_at	ENSG00000254959	INMT-MINDY4 readthrough (NMD candidate)
INO80D	11721772_at	ENSG00000114933	INO80 complex subunit D
INPP5E	11720872_at	ENSG00000148384	inositol polyphosphate-5-phosphatase E
INTS14	11747587_a_at	ENSG00000138614	integrator complex subunit 14
INTS4	11745566_a_at	ENSG00000149262	integrator complex subunit 4
INTS6	11727519_a_at	ENSG00000102786	integrator complex subunit 6
INTS6	11727521_s_at	ENSG00000102786	integrator complex subunit 6
INTS6	11746392_s_at	ENSG00000102786	integrator complex subunit 6
INTS6	11754834_x_at	ENSG00000102786	integrator complex subunit 6
INTS6L	11755755_a_at	ENSG00000165359	integrator complex subunit 6 like
INTS6P1	11746392_s_at	ENSG00000250492	integrator complex subunit 6 pseudogene 1
IRF3	11745498_a_at	ENSG00000126456	interferon regulatory factor 3
IRF5	11726685_a_at	ENSG00000128604	interferon regulatory factor 5
IRF5	11746801_x_at	ENSG00000128604	interferon regulatory factor 5
ITGA5	11715702_at	ENSG00000161638	integrin subunit alpha 5
ITGBL1	11749212_a_at	ENSG00000198542	integrin subunit beta like 1
IVD	11720642_a_at	ENSG00000128928	isovaleryl-CoA dehydrogenase
IVD	11720643_a_at	ENSG00000128928	isovaleryl-CoA dehydrogenase
IVL	11731653_a_at	ENSG00000163207	involucrin
JADE2	11720570_a_at	ENSG00000043143	jade family PHD finger 2
JADE2	11755784_a_at	ENSG00000043143	jade family PHD finger 2
JADE2	11758683_s_at	ENSG00000043143	jade family PHD finger 2
JAZF1	11720530_at	ENSG00000153814	JAZF zinc finger 1
JCHAIN	11735990_x_at	ENSG00000132465	joining chain of multimeric IgA and IgM
KAT7	11752292_s_at	ENSG00000136504	lysine acetyltransferase 7
KAT7P1	11752292_s_at	ENSG00000232842	KAT7 pseudogene 1
KBTBD11	11721566_s_at	ENSG00000176595	kelch repeat and BTB domain containing 11
KCNQ2	11730086_a_at	ENSG00000075043	potassium voltage-gated channel subfamily Q member 2
KCNS1	11737092_a_at	ENSG00000124134	potassium voltage-gated channel modifier subfamily S member 1
KCNV1	11730476_at	ENSG00000164794	potassium voltage-gated channel modifier subfamily V member 1
KCTD12	11715947_a_at	ENSG00000178695	potassium channel tetramerization domain containing 12
KCTD12	11715950_a_at	ENSG00000178695	potassium channel tetramerization domain containing 12
KDM2B	11747469_x_at	ENSG00000089094	lysine demethylase 2B
KDM2B	11752164_x_at	ENSG00000089094	lysine demethylase 2B
KDM3A	11716574_at	ENSG00000115548	lysine demethylase 3A
KDM4C	11752155_a_at	ENSG00000107077	lysine demethylase 4C
KDM5A	11743522_a_at	ENSG00000073614	lysine demethylase 5A
KHDRBS2	11735663_at	ENSG00000112232	KH RNA binding domain containing, signal transduction associated 2
KHNYN	11721165_a_at	ENSG00000100441	KH and NYN domain containing
KIF5C	11746261_s_at	ENSG00000168280	kinesin family member 5C
KIF5C	11754324_s_at	ENSG00000168280	kinesin family member 5C
KIR2DL1	11761947_x_at	ENSG00000125498	killer cell immunoglobulin like receptor, two Ig domains and long cytoplasmic tail 1
KIAA0586	11751916_a_at	ENSG00000100578	KIAA0586
KLF11	11747833_a_at	ENSG00000172059	KLF transcription factor 11
KLF13	11718160_at	ENSG00000169926	KLF transcription factor 13
KLF16	11753185_x_at	ENSG00000129911	KLF transcription factor 16
KLF7	11759429_a_at	ENSG00000118263	KLF transcription factor 7
KLHL12	11717664_s_at	ENSG00000117153	kelch like family member 12
KLHL9	11717632_s_at	ENSG00000198642	kelch like family member 9
KLK12	11738280_x_at	ENSG00000186474	kallikrein related peptidase 12
KMT2A	11739290_a_at	ENSG00000118058	lysine methyltransferase 2A
KMT2E	11726357_a_at	ENSG00000005483	lysine methyltransferase 2E (inactive)
KRTAP4-9	11742338_s_at	ENSG00000212722	keratin associated protein 4-9
LAMP3	11725429_at	ENSG00000078081	lysosomal associated membrane protein 3
LASP1	11715503_a_at	ENSG00000002834	LIM and SH3 protein 1
LEPR	11738813_a_at	ENSG00000116678	leptin receptor
LGMN	11733728_a_at	ENSG00000100600	legumain
LGMN	11746287_x_at	ENSG00000100600	legumain
LGMN	11752744_a_at	ENSG00000100600	legumain
LGMN	11752745_x_at	ENSG00000100600	legumain
LHFPL6	11718197_at	ENSG00000183722	LHFPL tetraspan subfamily member 6
LHPP	11744858_a_at	ENSG00000107902	phospholysine phosphohistidine inorganic pyrophosphate phosphatase
LIG1	11745979_a_at	ENSG00000105486	DNA ligase 1
LIG1	11749423_a_at	ENSG00000105486	DNA ligase 1
LIMK1	11724615_at	ENSG00000106683	LIM domain kinase 1
LIN37	11746235_a_at	ENSG00000267796	lin-37 DREAM MuvB core complex component
LIPH	11748223_a_at	ENSG00000163898	lipase H
LMO3	11741145_a_at	ENSG00000048540	LIM domain only 3
LOXL3	11721392_a_at	ENSG00000115318	lysyl oxidase like 3
LPIN2	11744149_at	ENSG00000101577	lipin 2
LRCH1	11759715_at	ENSG00000136141	leucine rich repeats and calponin homology domain containing 1
LRP4	11719435_a_at	ENSG00000134569	LDL receptor related protein 4
LRRIQ1	11741956_a_at	ENSG00000133640	leucine rich repeats and IQ motif containing 1
LRRTM2	11730809_at	ENSG00000146006	leucine rich repeat transmembrane neuronal 2
LTBP2	11720527_at	ENSG00000119681	latent transforming growth factor beta binding protein 2
LTBP2	11720528_at	ENSG00000119681	latent transforming growth factor beta binding protein 2
LY75	11725249_at	ENSG00000054219	lymphocyte antigen 75
MACF1	11754436_s_at	ENSG00000127603	microtubule actin crosslinking factor 1
MACF1	11754437_a_at	ENSG00000127603	microtubule actin crosslinking factor 1
MAFB	11721629_a_at	ENSG00000204103	MAF bZIP transcription factor B
MAGEC1	11729543_a_at	ENSG00000155495	MAGE family member C1
MAN2B1	11757369_s_at	ENSG00000104774	mannosidase alpha class 2B member 1
MANBA	11750126_a_at	ENSG00000109323	mannosidase beta
MAP3K14-AS1	11755021_s_at	ENSG00000267278	MAP3K14 antisense RNA 1
MAP3K3	11720218_a_at	ENSG00000198909	mitogen-activated protein kinase kinase kinase 3
MAP3K3	11720219_a_at	ENSG00000198909	mitogen-activated protein kinase kinase kinase 3
MAPK13	11721540_a_at	ENSG00000156711	mitogen-activated protein kinase 13
MAPRE2	11740972_a_at	ENSG00000166974	microtubule associated protein RP/EB family member 2
MAPRE2	11752946_a_at	ENSG00000166974	microtubule associated protein RP/EB family member 2
MAPRE2	11759301_at	ENSG00000166974	microtubule associated protein RP/EB family member 2
MAPRE2	11764039_s_at	ENSG00000166974	microtubule associated protein RP/EB family member 2
MAPT	11722667_a_at	ENSG00000186868	microtubule associated protein tau
MARCHF4	11726193_at	ENSG00000144583	membrane associated ring-CH-type finger 4
MARF1	11718247_a_at	ENSG00000166783	meiosis regulator and mRNA stability factor 1
MARF1	11718248_a_at	ENSG00000166783	meiosis regulator and mRNA stability factor 1
MARS1	11744024_a_at	ENSG00000166986	methionyl-tRNA synthetase 1
MASP1	11749805_a_at	ENSG00000127241	MBL associated serine protease 1
MASP1	11750715_a_at	ENSG00000127241	MBL associated serine protease 1
MATN2	11722791_s_at	ENSG00000132561	matrilin 2
MAU2	11725461_s_at	ENSG00000129933	MAU2 sister chromatid cohesion factor
MBD1	11759747_a_at	ENSG00000141644	methyl-CpG binding domain protein 1
MBD4	11719798_s_at	ENSG00000129071	methyl-CpG binding domain 4, DNA glycosylase
MBD4	11719799_a_at	ENSG00000129071	methyl-CpG binding domain 4, DNA glycosylase
MBNL2	11753045_a_at	ENSG00000139793	muscleblind like splicing regulator 2
MBNL2	11753046_x_at	ENSG00000139793	muscleblind like splicing regulator 2
MCM3AP	11757395_s_at	ENSG00000160294	minichromosome maintenance complex component 3 associated protein
MED24	11752617_a_at	ENSG00000008838	mediator complex subunit 24
MED6	11760464_x_at	ENSG00000133997	mediator complex subunit 6
MEF2D	11717186_a_at	ENSG00000116604	myocyte enhancer factor 2D
MEI1	11763765_a_at	ENSG00000167077	meiotic double-stranded break formation protein 1
METTL16	11755254_a_at	ENSG00000127804	methyltransferase 16, N6-methyladenosine
METTL3	11746194_x_at	ENSG00000165819	methyltransferase 3, N6-adenosine-methyltransferase complex catalytic subunit
MFAP4	11729157_a_at	ENSG00000166482	microfibril associated protein 4
MGAT4A	11739491_a_at	ENSG00000071073	alpha-1,3-mannosyl-glycoprotein 4-beta-N-acetylglucosaminyltransferase A
MICA	11738887_s_at	ENSG00000204520	MHC class I polypeptide-related sequence A
MICAL2	11737413_at	ENSG00000133816	microtubule associated monooxygenase, calponin and LIM domain containing 2
MID1	11721888_a_at	ENSG00000101871	midline 1
MID1	11745148_a_at	ENSG00000101871	midline 1
MID1	11756082_a_at	ENSG00000101871	midline 1
MIDN	11722386_at	ENSG00000167470	midnolin
MIGA1	11750916_a_at	ENSG00000180488	mitoguardin 1
MINDY4	11734566_a_at	ENSG00000106125	MINDY lysine 48 deubiquitinase 4
MIR5193	11718608_at	ENSG00000283726	microRNA 5193
MIR5196	11754830_a_at	ENSG00000284034	microRNA 5196
MIR939	11720093_at	ENSG00000284310	microRNA 939
MKRN2	11743757_a_at	ENSG00000075975	makorin ring finger protein 2
MLLT6	11715812_s_at	ENSG00000275023	MLLT6, PHD finger containing
MLN	11753741_a_at	ENSG00000096395	motilin
MLXIP	11723712_x_at	ENSG00000175727	MLX interacting protein
MLXIP	11758893_at	ENSG00000175727	MLX interacting protein
MMP1	11755928_s_at	ENSG00000196611	matrix metallopeptidase 1
MOBP	11744781_at	ENSG00000168314	myelin associated oligodendrocyte basic protein
MOG	11747169_a_at	ENSG00000204655	myelin oligodendrocyte glycoprotein
MPP1	11752958_a_at	ENSG00000130830	MAGUK p55 scaffold protein 1
MPZL1	11716104_a_at	ENSG00000197965	myelin protein zero like 1
MR1	11761914_a_at	ENSG00000153029	major histocompatibility complex, class I-related
MROH7	11752537_s_at	ENSG00000184313	maestro heat like repeat family member 7
MROH7-TTC4	11752537_s_at	ENSG00000271723	MROH7-TTC4 readthrough (NMD candidate)
MRPS5	11763290_at	ENSG00000144029	mitochondrial ribosomal protein S5
MS4A2	11738573_a_at	ENSG00000149534	membrane spanning 4-domains A2
MSC-AS1	11752813_a_at	ENSG00000235531	MSC antisense RNA 1
MSL2	11736379_at	ENSG00000174579	MSL complex subunit 2
MSX1	11736609_at	ENSG00000163132	msh homeobox 1
MTAP	11751853_s_at	ENSG00000099810	methylthioadenosine phosphorylase
MTM1	11720898_a_at	ENSG00000171100	myotubularin 1
MTM1	11749427_a_at	ENSG00000171100	myotubularin 1
MTMR2	11763034_at	ENSG00000087053	myotubularin related protein 2
MTMR9	11749179_a_at	ENSG00000104643	myotubularin related protein 9
MTURN	11718603_a_at	ENSG00000180354	maturin, neural progenitor differentiation regulator homolog
MVB12B	11718825_a_at	ENSG00000196814	multivesicular body subunit 12B
MVB12B	11732817_at	ENSG00000196814	multivesicular body subunit 12B
MXRA8	11747842_a_at	ENSG00000162576	matrix remodeling associated 8
MXRA8	11747843_x_at	ENSG00000162576	matrix remodeling associated 8
MXRA8	11748197_a_at	ENSG00000162576	matrix remodeling associated 8
MXRA8	11754786_s_at	ENSG00000162576	matrix remodeling associated 8
MYCBP2	11727121_at	ENSG00000005810	MYC binding protein 2
MYO18A	11718304_s_at	ENSG00000196535	myosin XVIIIA
MYO1H	11741532_at	ENSG00000174527	myosin IH
N4BP2L1	11732530_at	ENSG00000139597	NEDD4 binding protein 2 like 1
N4BP2L1	11755903_x_at	ENSG00000139597	NEDD4 binding protein 2 like 1
NACAD	11724331_at	ENSG00000136274	NAC alpha domain containing
NALCN	11761949_at	ENSG00000102452	sodium leak channel, non-selective
NANOS2	11738160_at	ENSG00000188425	nanos C2HC-type zinc finger 2
NAP1L4	11746215_a_at	ENSG00000205531	nucleosome assembly protein 1 like 4
NAP1L4	11747277_a_at	ENSG00000205531	nucleosome assembly protein 1 like 4
NASP	11722005_a_at	ENSG00000132780	nuclear autoantigenic sperm protein
NBPF1	11750634_x_at	ENSG00000219481	NBPF member 1
NBPF10	11750634_x_at	ENSG00000271425	NBPF member 10
NBPF11	11750634_x_at	ENSG00000263956	NBPF member 11
NBPF12	11750634_x_at	ENSG00000268043	NBPF member 12
NBPF14	11750634_x_at	ENSG00000270629	NBPF member 14
NBPF15	11750634_x_at	ENSG00000266338	NBPF member 15
NBPF19	11750634_x_at	ENSG00000271383	NBPF member 19
NBPF20	11750634_x_at	ENSG00000162825	NBPF member 20
NBPF25P	11750634_x_at	ENSG00000272150	NBPF member 25, pseudogene
NBPF25P	11750634_x_at	ENSG00000291005	NBPF member 25, pseudogene
NBPF26	11750634_x_at	ENSG00000273136	NBPF member 26
NBPF8	11750634_x_at	ENSG00000270231	NBPF member 8
NBPF9	11750634_x_at	ENSG00000269713	NBPF member 9
NBR1	11747268_s_at	ENSG00000188554	NBR1 autophagy cargo receptor
NBR2	11749447_a_at	ENSG00000198496	neighbor of BRCA1 lncRNA 2
NCEH1	11724838_a_at	ENSG00000144959	neutral cholesterol ester hydrolase 1
NCOA3	11721405_s_at	ENSG00000124151	nuclear receptor coactivator 3
NCOR1	11725115_a_at	ENSG00000141027	nuclear receptor corepressor 1
NCOR1	11725116_a_at	ENSG00000141027	nuclear receptor corepressor 1
NCOR1	11751590_a_at	ENSG00000141027	nuclear receptor corepressor 1
NDE1	11725110_a_at	ENSG00000072864	nudE neurodevelopment protein 1
NDRG1	11751342_a_at	ENSG00000104419	N-myc downstream regulated 1
NDRG1	11751343_x_at	ENSG00000104419	N-myc downstream regulated 1
NDRG1	11753431_x_at	ENSG00000104419	N-myc downstream regulated 1
NECAP2	11756228_s_at	ENSG00000157191	NECAP endocytosis associated 2
NECAP2	11757839_s_at	ENSG00000157191	NECAP endocytosis associated 2
NEGR1	11748179_a_at	ENSG00000172260	neuronal growth regulator 1
NEK9	11736077_a_at	ENSG00000119638	NIMA related kinase 9
NEK9	11736079_a_at	ENSG00000119638	NIMA related kinase 9
NELL1	11759879_a_at	ENSG00000165973	neural EGFL like 1
NEMF	11739242_x_at	ENSG00000165525	nuclear export mediator factor
NF1	11752444_a_at	ENSG00000196712	neurofibromin 1
NFATC4	11748240_x_at	ENSG00000100968	nuclear factor of activated T cells 4
NFE2L1	11748075_a_at	ENSG00000082641	NFE2 like bZIP transcription factor 1
NFIC	11731487_x_at	ENSG00000141905	nuclear factor I C
NFKB1	11717542_a_at	ENSG00000109320	nuclear factor kappa B subunit 1
NIBAN3	11738541_x_at	ENSG00000167483	niban apoptosis regulator 3
NIN	11735583_a_at	ENSG00000100503	ninein
NIN	11738799_x_at	ENSG00000100503	ninein
NOP14	11746305_s_at	ENSG00000087269	NOP14 nucleolar protein
NOTCH2	11745768_a_at	ENSG00000134250	notch receptor 2
NOVA1	11746375_a_at	ENSG00000139910	NOVA alternative splicing regulator 1
NPAT	11743180_at	ENSG00000149308	nuclear protein, coactivator of histone transcription
NPAT	11750572_a_at	ENSG00000149308	nuclear protein, coactivator of histone transcription
NPPC	11738510_s_at	ENSG00000163273	natriuretic peptide C
NPR3	11746683_a_at	ENSG00000113389	natriuretic peptide receptor 3
NR1D1	11723989_s_at	ENSG00000126368	nuclear receptor subfamily 1 group D member 1
NR1D2	11722087_a_at	ENSG00000174738	nuclear receptor subfamily 1 group D member 2
NR1D2	11722088_s_at	ENSG00000174738	nuclear receptor subfamily 1 group D member 2
NR1D2	11751940_a_at	ENSG00000174738	nuclear receptor subfamily 1 group D member 2
NRAP	11723999_a_at	ENSG00000197893	nebulin related anchoring protein
NRBP1	11755115_x_at	ENSG00000115216	nuclear receptor binding protein 1
NRG3	11745434_a_at	ENSG00000185737	neuregulin 3
NRP1	11728214_a_at	ENSG00000099250	neuropilin 1
NRP1	11750657_a_at	ENSG00000099250	neuropilin 1
NRP2	11716970_a_at	ENSG00000118257	neuropilin 2
NSF	11748462_a_at	ENSG00000073969	N-ethylmaleimide sensitive factor, vesicle fusing ATPase
NTM	11738845_x_at	ENSG00000182667	neurotrimin
NUDT21	11718401_a_at	ENSG00000167005	nudix hydrolase 21
NUMA1	11744332_a_at	ENSG00000137497	nuclear mitotic apparatus protein 1
NUP43	11750219_a_at	ENSG00000120253	nucleoporin 43
NUP50	11727857_a_at	ENSG00000093000	nucleoporin 50
NUP58	11755541_x_at	ENSG00000139496	nucleoporin 58
NUP62	11736409_a_at	ENSG00000213024	nucleoporin 62
ODAD3	11756941_a_at	ENSG00000198003	outer dynein arm docking complex subunit 3
OGA	11715706_x_at	ENSG00000198408	O-GlcNAcase
OPHN1	11752110_a_at	ENSG00000079482	oligophrenin 1
OR10A5	11738578_at	ENSG00000166363	olfactory receptor family 10 subfamily A member 5
OR10H1	11735853_x_at	ENSG00000186723	olfactory receptor family 10 subfamily H member 1
OR10H2	11735909_at	ENSG00000171942	olfactory receptor family 10 subfamily H member 2
OR3A2	11738246_at	ENSG00000221882	olfactory receptor family 3 subfamily A member 2
OS9	11752347_x_at	ENSG00000135506	OS9 endoplasmic reticulum lectin
OSBPL9	11726539_a_at	ENSG00000117859	oxysterol binding protein like 9
P2RX5	11721388_a_at	ENSG00000083454	purinergic receptor P2X 5
P2RY1	11737854_at	ENSG00000169860	purinergic receptor P2Y1
P2RY14	11733632_s_at	ENSG00000174944	purinergic receptor P2Y14
PAG1	11724375_at	ENSG00000076641	phosphoprotein membrane anchor with glycosphingolipid microdomains 1
PAH	11744206_at	ENSG00000171759	phenylalanine hydroxylase
PAIP1P1	11747321_a_at	ENSG00000233892	PAIP1 pseudogene 1
PANX2	11752322_a_at	ENSG00000073150	pannexin 2
PAPLN	11749093_a_at	ENSG00000100767	papilin, proteoglycan like sulfated glycoprotein
PARP1	11745950_a_at	ENSG00000143799	poly(ADP-ribose) polymerase 1
PATZ1	11757987_s_at	ENSG00000100105	POZ/BTB and AT hook containing zinc finger 1
PAX6	11722467_s_at	ENSG00000007372	paired box 6
PBX4	11726518_at	ENSG00000105717	PBX homeobox 4
PCDHA6	11715226_s_at	ENSG00000081842	protocadherin alpha 6
PDE4DIP	11748916_x_at	ENSG00000178104	phosphodiesterase 4D interacting protein
PDE4DIPP2	11748916_x_at	ENSG00000275131	PDE4DIP pseudogene 2
PDE7A	11732430_at	ENSG00000205268	phosphodiesterase 7A
PDIA6	11715434_a_at	ENSG00000143870	protein disulfide isomerase family A member 6
PDZRN3	11753143_a_at	ENSG00000121440	PDZ domain containing ring finger 3
PER3	11719045_a_at	ENSG00000049246	period circadian regulator 3
PER3	11745947_a_at	ENSG00000049246	period circadian regulator 3
PGAP3	11749974_a_at	ENSG00000161395	post-GPI attachment to proteins phospholipase 3
PGR	11750901_x_at	ENSG00000082175	progesterone receptor
PHC3	11752040_s_at	ENSG00000173889	polyhomeotic homolog 3
PHF14	11730377_a_at	ENSG00000106443	PHD finger protein 14
PHKA2	11723979_s_at	ENSG00000044446	phosphorylase kinase regulatory subunit alpha 2
PHKA2	11723980_at	ENSG00000044446	phosphorylase kinase regulatory subunit alpha 2
PI16	11751413_a_at	ENSG00000164530	peptidase inhibitor 16
PIAS1	11737768_a_at	ENSG00000033800	protein inhibitor of activated STAT 1
PIGR	11716110_s_at	ENSG00000162896	polymeric immunoglobulin receptor
PIK3IP1	11740088_s_at	ENSG00000100100	phosphoinositide-3-kinase interacting protein 1
PIK3IP1	11740089_x_at	ENSG00000100100	phosphoinositide-3-kinase interacting protein 1
PIK3IP1	11742871_a_at	ENSG00000100100	phosphoinositide-3-kinase interacting protein 1
PIK3IP1	11742872_s_at	ENSG00000100100	phosphoinositide-3-kinase interacting protein 1
PIK3IP1	11751393_a_at	ENSG00000100100	phosphoinositide-3-kinase interacting protein 1
PIK3IP1	11751394_s_at	ENSG00000100100	phosphoinositide-3-kinase interacting protein 1
PIK3IP1	11757868_a_at	ENSG00000100100	phosphoinositide-3-kinase interacting protein 1
PIK3R1	11733018_s_at	ENSG00000145675	phosphoinositide-3-kinase regulatory subunit 1
PIK3R1	11739539_a_at	ENSG00000145675	phosphoinositide-3-kinase regulatory subunit 1
PIK3R1	11739541_a_at	ENSG00000145675	phosphoinositide-3-kinase regulatory subunit 1
PIK3R1	11748670_a_at	ENSG00000145675	phosphoinositide-3-kinase regulatory subunit 1
PIP4K2A	11739348_at	ENSG00000150867	phosphatidylinositol-5-phosphate 4-kinase type 2 alpha
PIP4K2B	11715888_s_at	ENSG00000276293	phosphatidylinositol-5-phosphate 4-kinase type 2 beta
PIWIL4	11756909_a_at	ENSG00000134627	piwi like RNA-mediated gene silencing 4
PKM	11756971_x_at	ENSG00000067225	pyruvate kinase M1/2
PLA2G15	11751383_a_at	ENSG00000103066	phospholipase A2 group XV
PLA2R1	11740417_a_at	ENSG00000153246	phospholipase A2 receptor 1
PLCXD3	11729980_a_at	ENSG00000182836	phosphatidylinositol specific phospholipase C X domain containing 3
PLEKHA2	11716804_at	ENSG00000169499	pleckstrin homology domain containing A2
PLXND1	11751084_s_at	ENSG00000004399	plexin D1
PMM2	11761251_at	ENSG00000140650	phosphomannomutase 2
PNISR	11744502_a_at	ENSG00000132424	PNN interacting serine and arginine rich protein
PNISR	11755634_x_at	ENSG00000132424	PNN interacting serine and arginine rich protein
PNLIPRP1	11756801_a_at	ENSG00000187021	pancreatic lipase related protein 1
PNOC	11761725_a_at	ENSG00000168081	prepronociceptin
POGK	11748465_a_at	ENSG00000143157	pogo transposable element derived with KRAB domain
POLM	11760547_x_at	ENSG00000122678	DNA polymerase mu
POLR2D	11722450_a_at	ENSG00000144231	RNA polymerase II subunit D
POT1	11741651_a_at	ENSG00000128513	protection of telomeres 1
POU1F1	11738429_x_at	ENSG00000064835	POU class 1 homeobox 1
POU2F1	11726775_a_at	ENSG00000143190	POU class 2 homeobox 1
PPARD	11725171_at	ENSG00000112033	peroxisome proliferator activated receptor delta
PPDPF	11729581_x_at	ENSG00000125534	pancreatic progenitor cell differentiation and proliferation factor
PPFIA4	11748026_a_at	ENSG00000143847	PTPRF interacting protein alpha 4
PPM1M	11755237_a_at	ENSG00000164088	protein phosphatase, Mg2+/Mn2+ dependent 1M
PPP1R21	11743941_s_at	ENSG00000162869	protein phosphatase 1 regulatory subunit 21
PPP1R21	11744882_a_at	ENSG00000162869	protein phosphatase 1 regulatory subunit 21
PPP2R1A	11747739_a_at	ENSG00000105568	protein phosphatase 2 scaffold subunit Aalpha
PPP2R1A	11749158_a_at	ENSG00000105568	protein phosphatase 2 scaffold subunit Aalpha
PPP2R3B	11724073_a_at	ENSG00000167393	protein phosphatase 2 regulatory subunit B''beta
PPP2R3B	11724073_a_at	ENSG00000292327	protein phosphatase 2 regulatory subunit B''beta
PPP6R3	11745849_a_at	ENSG00000110075	protein phosphatase 6 regulatory subunit 3
PPP6R3	11752108_a_at	ENSG00000110075	protein phosphatase 6 regulatory subunit 3
PPT1	11716533_a_at	ENSG00000131238	palmitoyl-protein thioesterase 1
PPWD1	11746892_a_at	ENSG00000113593	peptidylprolyl isomerase domain and WD repeat containing 1
PQBP1	11753989_x_at	ENSG00000102103	polyglutamine binding protein 1
PRCP	11752948_a_at	ENSG00000137509	prolylcarboxypeptidase
PRKCQ	11750753_a_at	ENSG00000065675	protein kinase C theta
PRKCSH	11744126_a_at	ENSG00000130175	protein kinase C substrate 80K-H
PRKX	11729037_s_at	ENSG00000183943	protein kinase cAMP-dependent X-linked catalytic subunit
PRKY	11729037_s_at	ENSG00000099725	protein kinase Y-linked (pseudogene)
PRKY	11729037_s_at	ENSG00000293442	protein kinase Y-linked (pseudogene)
PRM1	11717253_at	ENSG00000175646	protamine 1
PRMT2	11746466_a_at	ENSG00000160310	protein arginine methyltransferase 2
PROB1	11745247_at	ENSG00000228672	proline rich basic protein 1
PRPF3	11747443_a_at	ENSG00000117360	pre-mRNA processing factor 3
PRPF6	11744203_a_at	ENSG00000101161	pre-mRNA processing factor 6
PRR14L	11727637_at	ENSG00000183530	proline rich 14 like
PRRC2B	11715799_s_at	ENSG00000288701	proline rich coiled-coil 2B
PRRC2C	11716567_a_at	ENSG00000117523	proline rich coiled-coil 2C
PRUNE1	11749309_a_at	ENSG00000143363	prune exopolyphosphatase 1
PSEN1	11718679_a_at	ENSG00000080815	presenilin 1
PSEN1	11756571_a_at	ENSG00000080815	presenilin 1
PSMD13	11741771_a_at	ENSG00000185627	proteasome 26S subunit, non-ATPase 13
PSMD2	11758266_s_at	ENSG00000175166	proteasome 26S subunit ubiquitin receptor, non-ATPase 2
PSME1	11726580_x_at	ENSG00000092010	proteasome activator subunit 1
PTBP3	11733057_a_at	ENSG00000119314	polypyrimidine tract binding protein 3
PTDSS1	11743066_s_at	ENSG00000156471	phosphatidylserine synthase 1
PTGFR	11734179_a_at	ENSG00000122420	prostaglandin F receptor
PTGR3	11729813_a_at	ENSG00000180011	prostaglandin reductase 3
PTGR3	11729814_a_at	ENSG00000180011	prostaglandin reductase 3
PTGS1	11749730_a_at	ENSG00000095303	prostaglandin-endoperoxide synthase 1
PTPN7	11750506_x_at	ENSG00000143851	protein tyrosine phosphatase non-receptor type 7
PTPRD	11736890_a_at	ENSG00000153707	protein tyrosine phosphatase receptor type D
PTPRJ	11728971_at	ENSG00000149177	protein tyrosine phosphatase receptor type J
PTPRS	11719231_a_at	ENSG00000105426	protein tyrosine phosphatase receptor type S
PUM2	11718806_a_at	ENSG00000055917	pumilio RNA binding family member 2
PXN	11736018_x_at	ENSG00000089159	paxillin
PXYLP1	11749205_a_at	ENSG00000155893	2-phosphoxylose phosphatase 1
QNG1	11727599_x_at	ENSG00000165118	Q-nucleotide N-glycosylase 1
RAB2B	11758104_s_at	ENSG00000129472	RAB2B, member RAS oncogene family
RAB30	11735765_a_at	ENSG00000137502	RAB30, member RAS oncogene family
RAB7A	11722812_s_at	ENSG00000075785	RAB7A, member RAS oncogene family
RABEP1	11718615_a_at	ENSG00000029725	rabaptin, RAB GTPase binding effector protein 1
RABEP2	11761256_at	ENSG00000177548	rabaptin, RAB GTPase binding effector protein 2
RAD17	11739778_a_at	ENSG00000152942	RAD17 checkpoint clamp loader component
RAD52	11749968_a_at	ENSG00000002016	RAD52 homolog, DNA repair protein
RAPGEF4	11736717_a_at	ENSG00000091428	Rap guanine nucleotide exchange factor 4
RAPGEF6	11722314_a_at	ENSG00000158987	Rap guanine nucleotide exchange factor 6
RAPGEF6	11750374_a_at	ENSG00000158987	Rap guanine nucleotide exchange factor 6
RAPGEF6	11750375_a_at	ENSG00000158987	Rap guanine nucleotide exchange factor 6
RASGEF1A	11727731_at	ENSG00000198915	RasGEF domain family member 1A
RASGRF1	11730401_a_at	ENSG00000058335	Ras protein specific guanine nucleotide releasing factor 1
RASL12	11748288_a_at	ENSG00000103710	RAS like family 12
RBBP6	11743328_a_at	ENSG00000122257	RB binding protein 6, ubiquitin ligase
RBM22	11719269_s_at	ENSG00000086589	RNA binding motif protein 22
RBM22	11719270_s_at	ENSG00000086589	RNA binding motif protein 22
RBM6	11717336_a_at	ENSG00000004534	RNA binding motif protein 6
RBMS3	11735319_a_at	ENSG00000144642	RNA binding motif single stranded interacting protein 3
RBP5	11727573_a_at	ENSG00000139194	retinol binding protein 5
RBP5	11727574_at	ENSG00000139194	retinol binding protein 5
RBPJ	11739392_a_at	ENSG00000168214	recombination signal binding protein for immunoglobulin kappa J region
RBPJ	11757737_s_at	ENSG00000168214	recombination signal binding protein for immunoglobulin kappa J region
RCBTB2	11756563_a_at	ENSG00000136161	RCC1 and BTB domain containing protein 2
REEP5	11716615_s_at	ENSG00000129625	receptor accessory protein 5
REL	11736551_x_at	ENSG00000162924	REL proto-oncogene, NF-kB subunit
REL	11750334_a_at	ENSG00000162924	REL proto-oncogene, NF-kB subunit
RETNLB	11753455_s_at	ENSG00000163515	resistin like beta
RFTN1	11716451_s_at	ENSG00000131378	raftlin, lipid raft linker 1
RFX4	11724690_a_at	ENSG00000111783	regulatory factor X4
RFX5	11725092_s_at	ENSG00000143390	regulatory factor X5
RGL1	11747969_a_at	ENSG00000143344	ral guanine nucleotide dissociation stimulator like 1
RGL1	11751036_a_at	ENSG00000143344	ral guanine nucleotide dissociation stimulator like 1
RGS1	11760967_at	ENSG00000090104	regulator of G protein signaling 1
RHOF	11746206_a_at	ENSG00000139725	ras homolog family member F, filopodia associated
RIN2	11752570_a_at	ENSG00000132669	Ras and Rab interactor 2
RNASE11	11728930_at	ENSG00000173464	ribonuclease A family member 11 (inactive)
RNASET2	11716908_a_at	ENSG00000026297	ribonuclease T2
RNF220	11748512_x_at	ENSG00000187147	ring finger protein 220
RNF222	11742447_x_at	ENSG00000189051	ring finger protein 222
RNF6	11749977_a_at	ENSG00000127870	ring finger protein 6
RNGTT	11747806_a_at	ENSG00000111880	RNA guanylyltransferase and 5'-phosphatase
RNU1-149P	11715292_at	ENSG00000212172	RNA, U1 small nuclear 149, pseudogene
RPRD2	11719593_at	ENSG00000163125	regulation of nuclear pre-mRNA domain containing 2
RRM2B	11736192_at	ENSG00000048392	ribonucleotide reductase regulatory TP53 inducible subunit M2B
RRN3	11719607_x_at	ENSG00000085721	RRN3 homolog, RNA polymerase I transcription factor
RTF1	11717356_at	ENSG00000137815	RTF1 homolog, Paf1/RNA polymerase II complex component
RUBCN	11739666_a_at	ENSG00000145016	rubicon autophagy regulator
RUNX1	11753289_s_at	ENSG00000159216	RUNX family transcription factor 1
RYR1	11730389_at	ENSG00000196218	ryanodine receptor 1
S100A7L2	11742662_at	ENSG00000197364	S100 calcium binding protein A7 like 2
SCRN1	11730781_a_at	ENSG00000136193	secernin 1
SCRN1	11736772_s_at	ENSG00000136193	secernin 1
SEC61A1	11749955_a_at	ENSG00000058262	SEC61 translocon subunit alpha 1
SECISBP2	11717603_a_at	ENSG00000187742	SECIS binding protein 2
SEPTIN2	11749787_a_at	ENSG00000168385	septin 2
SEPTIN6	11721626_a_at	ENSG00000125354	septin 6
SEPTIN6	11734791_x_at	ENSG00000125354	septin 6
SERHL	11723613_s_at	ENSG00000172250	serine hydrolase like (pseudogene)
SERHL	11723613_s_at	ENSG00000293485	serine hydrolase like (pseudogene)
SERHL2	11723613_s_at	ENSG00000183569	serine hydrolase like 2
SERHL2	11761717_x_at	ENSG00000183569	serine hydrolase like 2
SERPINB9	11729262_a_at	ENSG00000170542	serpin family B member 9
SESN1	11719062_a_at	ENSG00000080546	sestrin 1
SETBP1	11756106_a_at	ENSG00000152217	SET binding protein 1
SETD1B	11742418_a_at	ENSG00000139718	SET domain containing 1B, histone lysine methyltransferase
SF3B1	11716085_at	ENSG00000115524	splicing factor 3b subunit 1
SFRP1	11723245_a_at	ENSG00000104332	secreted frizzled related protein 1
SGMS1	11739455_a_at	ENSG00000198964	sphingomyelin synthase 1
SGSH	11721101_x_at	ENSG00000181523	N-sulfoglucosamine sulfohydrolase
SGSM3	11742876_a_at	ENSG00000100359	small G protein signaling modulator 3
SH3TC2	11733201_at	ENSG00000169247	SH3 domain and tetratricopeptide repeats 2
SHPRH	11722755_a_at	ENSG00000146414	SNF2 histone linker PHD RING helicase
SIGLEC1	11755646_a_at	ENSG00000088827	sialic acid binding Ig like lectin 1
SIGLEC6	11734205_s_at	ENSG00000105492	sialic acid binding Ig like lectin 6
SIMC1	11748256_s_at	ENSG00000170085	SUMO interacting motifs containing 1
SIMC1P1	11748256_s_at	ENSG00000246596	SIMC1 pseudogene 1
SIN3A	11730293_a_at	ENSG00000169375	SIN3 transcription regulator family member A
SIN3A	11735494_a_at	ENSG00000169375	SIN3 transcription regulator family member A
SLAMF1	11749076_a_at	ENSG00000117090	signaling lymphocytic activation molecule family member 1
SLAMF8	11739754_at	ENSG00000158714	SLAM family member 8
SLC10A7	11751498_a_at	ENSG00000120519	solute carrier family 10 member 7
SLC15A3	11746309_a_at	ENSG00000110446	solute carrier family 15 member 3
SLC17A9	11721590_a_at	ENSG00000101194	solute carrier family 17 member 9
SLC1A2	11718492_at	ENSG00000110436	solute carrier family 1 member 2
SLC1A4	11747026_a_at	ENSG00000115902	solute carrier family 1 member 4
SLC1A5	11740714_a_at	ENSG00000105281	solute carrier family 1 member 5
SLC22A18	11756459_a_at	ENSG00000110628	solute carrier family 22 member 18
SLC25A12	11749348_a_at	ENSG00000115840	solute carrier family 25 member 12
SLC27A6	11731791_a_at	ENSG00000113396	solute carrier family 27 member 6
SLC27A6	11731792_x_at	ENSG00000113396	solute carrier family 27 member 6
SLC33A1	11759003_a_at	ENSG00000169359	solute carrier family 33 member 1
SLC35C2	11746442_x_at	ENSG00000080189	solute carrier family 35 member C2
SLC38A4	11740711_a_at	ENSG00000139209	solute carrier family 38 member 4
SLC39A1	11748143_x_at	ENSG00000143570	solute carrier family 39 member 1
SLC39A14	11737909_at	ENSG00000104635	solute carrier family 39 member 14
SLC39A3	11717675_x_at	ENSG00000141873	solute carrier family 39 member 3
SLC39A9	11716681_at	ENSG00000029364	solute carrier family 39 member 9
SLC43A3	11749600_a_at	ENSG00000134802	solute carrier family 43 member 3
SLC46A3	11755020_a_at	ENSG00000139508	solute carrier family 46 member 3
SLC9A9	11748817_a_at	ENSG00000181804	solute carrier family 9 member A9
SLC9A9	11757926_s_at	ENSG00000181804	solute carrier family 9 member A9
SLIT1	11728891_at	ENSG00000187122	slit guidance ligand 1
SMAD6	11730337_at	ENSG00000137834	SMAD family member 6
SMAD7	11725514_a_at	ENSG00000101665	SMAD family member 7
SMAD7	11748986_a_at	ENSG00000101665	SMAD family member 7
SMARCA4	11742959_a_at	ENSG00000127616	SWI/SNF related, matrix associated, actin dependent regulator of chromatin, subfamily a, member 4
SMARCC2	11719086_a_at	ENSG00000139613	SWI/SNF related, matrix associated, actin dependent regulator of chromatin subfamily c member 2
SMARCE1	11718772_at	ENSG00000073584	SWI/SNF related, matrix associated, actin dependent regulator of chromatin, subfamily e, member 1
SMYD2	11754789_a_at	ENSG00000143499	SET and MYND domain containing 2
SNAI3	11755198_s_at	ENSG00000185669	snail family transcriptional repressor 3
SNHG17	11763920_at	ENSG00000196756	small nucleolar RNA host gene 17
SNHG32	11715978_a_at	ENSG00000204387	small nucleolar RNA host gene 32
SNORA70	11761039_at	ENSG00000201376	Small nucleolar RNA SNORA70
SNORA71A	11763920_at	ENSG00000225091	small nucleolar RNA, H/ACA box 71A
SNORD52	11715978_a_at	ENSG00000201754	small nucleolar RNA, C/D box 52
SNORD84	11715528_a_at	ENSG00000265236	small nucleolar RNA, C/D box 84
SNORD84	11715529_x_at	ENSG00000265236	small nucleolar RNA, C/D box 84
SNRNP200	11752227_x_at	ENSG00000144028	small nuclear ribonucleoprotein U5 subunit 200
SNRNP35	11732056_a_at	ENSG00000184209	small nuclear ribonucleoprotein U11/U12 subunit 35
SNTN	11744240_at	ENSG00000188817	sentan, cilia apical structure protein
SNW1	11716089_x_at	ENSG00000100603	SNW domain containing 1
SNX18	11737518_a_at	ENSG00000178996	sorting nexin 18
SNX29	11743589_at	ENSG00000048471	sorting nexin 29
SNX33	11723395_a_at	ENSG00000173548	sorting nexin 33
SNX6	11757271_s_at	ENSG00000129515	sorting nexin 6
SOD3	11718428_x_at	ENSG00000109610	superoxide dismutase 3
SOD3	11756726_a_at	ENSG00000109610	superoxide dismutase 3
SORBS3	11734781_a_at	ENSG00000120896	sorbin and SH3 domain containing 3
SP1	11722808_at	ENSG00000185591	Sp1 transcription factor
SP100	11744783_a_at	ENSG00000067066	SP100 nuclear antigen
SP100	11745015_a_at	ENSG00000067066	SP100 nuclear antigen
SP100	11747301_a_at	ENSG00000067066	SP100 nuclear antigen
SPANXN2	11740894_x_at	ENSG00000268988	SPANX family member N2
SPATA18	11724914_at	ENSG00000163071	spermatogenesis associated 18
SPATA18	11756774_a_at	ENSG00000163071	spermatogenesis associated 18
SPECC1L	11736103_s_at	ENSG00000100014	sperm antigen with calponin homology and coiled-coil domains 1 like
SPIDR	11746386_a_at	ENSG00000164808	scaffold protein involved in DNA repair
SPINT2	11742851_x_at	ENSG00000167642	serine peptidase inhibitor, Kunitz type 2
SPRED1	11734828_at	ENSG00000166068	sprouty related EVH1 domain containing 1
SPRED2	11741055_a_at	ENSG00000198369	sprouty related EVH1 domain containing 2
SREK1IP1	11752424_a_at	ENSG00000153006	SREK1 interacting protein 1
SRRM1	11718775_a_at	ENSG00000133226	serine and arginine repetitive matrix 1
SRRM1	11746679_a_at	ENSG00000133226	serine and arginine repetitive matrix 1
SRRM1P3	11718775_a_at	ENSG00000237307	serine/arginine repetitive matrix 1 pseudogene 3
SS18	11722799_a_at	ENSG00000141380	SS18 subunit of BAF chromatin remodeling complex
SS18	11748790_a_at	ENSG00000141380	SS18 subunit of BAF chromatin remodeling complex
SSBP3	11722640_s_at	ENSG00000157216	single stranded DNA binding protein 3
SSBP3P1	11722640_s_at	ENSG00000233225	SSBP3 pseudogene 1
SSH1	11754319_at	ENSG00000084112	slingshot protein phosphatase 1
SSPN	11736259_a_at	ENSG00000123096	sarcospan
SSPN	11736260_a_at	ENSG00000123096	sarcospan
SSPN	11740510_a_at	ENSG00000123096	sarcospan
SSR1	11717052_at	ENSG00000124783	signal sequence receptor subunit 1
SSR1	11717054_a_at	ENSG00000124783	signal sequence receptor subunit 1
SSR1	11757542_s_at	ENSG00000124783	signal sequence receptor subunit 1
SSX6P	11742497_x_at	ENSG00000171483	SSX family member 6, pseudogene
ST14	11748085_a_at	ENSG00000149418	ST14 transmembrane serine protease matriptase
ST3GAL4	11754117_a_at	ENSG00000110080	ST3 beta-galactoside alpha-2,3-sialyltransferase 4
ST6GAL1	11717719_a_at	ENSG00000073849	ST6 beta-galactoside alpha-2,6-sialyltransferase 1
ST8SIA1	11715292_at	ENSG00000111728	ST8 alpha-N-acetyl-neuraminide alpha-2,8-sialyltransferase 1
STAG3	11732168_x_at	ENSG00000066923	STAG3 cohesin complex component
STAP1	11745107_a_at	ENSG00000035720	signal transducing adaptor family member 1
STARD3	11716353_x_at	ENSG00000131748	StAR related lipid transfer domain containing 3
STARD5	11729953_a_at	ENSG00000172345	StAR related lipid transfer domain containing 5
STAT1	AFFX-HUMISGF3A/M97935_5_at	ENSG00000115415	signal transducer and activator of transcription 1
STX16	11737824_a_at	ENSG00000124222	syntaxin 16
SUMO4	11740798_at	ENSG00000177688	small ubiquitin like modifier 4
SUPT3H	11735252_a_at	ENSG00000196284	SPT3 homolog, SAGA and STAGA complex component
SVEP1	11719866_at	ENSG00000165124	sushi, von Willebrand factor type A, EGF and pentraxin domain containing 1
SVEP1	11719867_at	ENSG00000165124	sushi, von Willebrand factor type A, EGF and pentraxin domain containing 1
SVEP1	11753968_a_at	ENSG00000165124	sushi, von Willebrand factor type A, EGF and pentraxin domain containing 1
SYNE1	11746113_a_at	ENSG00000131018	spectrin repeat containing nuclear envelope protein 1
SYVN1	11716172_at	ENSG00000162298	synoviolin 1
TACC1	11719167_a_at	ENSG00000147526	transforming acidic coiled-coil containing protein 1
TACSTD2	11717301_at	ENSG00000184292	tumor associated calcium signal transducer 2
TAF6	11721727_x_at	ENSG00000106290	TATA-box binding protein associated factor 6
TAPBP	11756617_a_at	ENSG00000231925	TAP binding protein
TAS2R46	11742393_at	ENSG00000226761	taste 2 receptor member 46
TBC1D22A	11756172_x_at	ENSG00000054611	TBC1 domain family member 22A
TBC1D2B	11736157_a_at	ENSG00000167202	TBC1 domain family member 2B
TBC1D4	11731503_at	ENSG00000136111	TBC1 domain family member 4
TBC1D9B	11722336_a_at	ENSG00000197226	TBC1 domain family member 9B
TBCD	11730262_a_at	ENSG00000141556	tubulin folding cofactor D
TBCE	11749261_a_at	ENSG00000284770	tubulin folding cofactor E
TBX18	11735274_a_at	ENSG00000112837	T-box transcription factor 18
TBX5	11715291_s_at	ENSG00000089225	T-box transcription factor 5
TCEANC2	11732388_at	ENSG00000116205	transcription elongation factor A N-terminal and central domain containing 2
TCF12	11720583_s_at	ENSG00000140262	transcription factor 12
TCF12	11745727_a_at	ENSG00000140262	transcription factor 12
TCF12	11752247_a_at	ENSG00000140262	transcription factor 12
TCF4	11747698_x_at	ENSG00000196628	transcription factor 4
TCF4	11754605_a_at	ENSG00000196628	transcription factor 4
TCF4	11754733_a_at	ENSG00000196628	transcription factor 4
TECTA	11741795_at	ENSG00000109927	tectorin alpha
TEF	11724304_a_at	ENSG00000167074	TEF transcription factor, PAR bZIP family member
TEX35	11754749_a_at	ENSG00000240021	testis expressed 35
TFAP2A	11749049_a_at	ENSG00000137203	transcription factor AP-2 alpha
TFAP2A	11753337_a_at	ENSG00000137203	transcription factor AP-2 alpha
TFCP2	11758918_s_at	ENSG00000135457	transcription factor CP2
TGFBR2	11750840_s_at	ENSG00000163513	transforming growth factor beta receptor 2
TGOLN2	11716903_a_at	ENSG00000152291	trans-golgi network protein 2
TIAM1	11732415_s_at	ENSG00000156299	TIAM Rac1 associated GEF 1
TICAM2	11745544_a_at	ENSG00000243414	TIR domain containing adaptor molecule 2
TLE3	11758215_s_at	ENSG00000140332	TLE family member 3, transcriptional corepressor
TLK2	11754619_s_at	ENSG00000146872	tousled like kinase 2
TLR10	11746534_a_at	ENSG00000174123	toll like receptor 10
TLR5	11731200_a_at	ENSG00000187554	toll like receptor 5
TLR7	11731148_at	ENSG00000196664	toll like receptor 7
TMBIM6	11747146_s_at	ENSG00000139644	transmembrane BAX inhibitor motif containing 6
TMC1	11738343_a_at	ENSG00000165091	transmembrane channel like 1
TMCC2	11721928_a_at	ENSG00000133069	transmembrane and coiled-coil domain family 2
TMCC2	11721929_x_at	ENSG00000133069	transmembrane and coiled-coil domain family 2
TMCC2	11721931_s_at	ENSG00000133069	transmembrane and coiled-coil domain family 2
TMED7-TICAM2	11745544_a_at	ENSG00000251201	TMED7-TICAM2 readthrough
TMEM106A	11758419_s_at	ENSG00000184988	transmembrane protein 106A
TMEM130	11740373_x_at	ENSG00000166448	transmembrane protein 130
TMEM169	11727277_a_at	ENSG00000163449	transmembrane protein 169
TMEM176B	11719871_a_at	ENSG00000106565	transmembrane protein 176B
TMEM183A	11764173_s_at	ENSG00000163444	transmembrane protein 183A
TMEM185A	11724268_s_at	ENSG00000269556	transmembrane protein 185A
TMEM185AP1	11724268_s_at	ENSG00000235254	transmembrane protein 185A pseudogene 1
TMEM245	11718676_x_at	ENSG00000106771	transmembrane protein 245
TMEM245	11718677_at	ENSG00000106771	transmembrane protein 245
TMEM248	11715885_at	ENSG00000106609	transmembrane protein 248
TMEM254	11737751_x_at	ENSG00000133678	transmembrane protein 254
TMEM254	11747486_a_at	ENSG00000133678	transmembrane protein 254
TMEM26	11761818_a_at	ENSG00000196932	transmembrane protein 26
TMEM35B	11754223_at	ENSG00000243749	transmembrane protein 35B
TMX1	11761039_at	ENSG00000139921	thioredoxin related transmembrane protein 1
TNFRSF11A	11735293_x_at	ENSG00000141655	TNF receptor superfamily member 11a
TNFRSF14	11743194_x_at	ENSG00000157873	TNF receptor superfamily member 14
TNFRSF14	11745772_x_at	ENSG00000157873	TNF receptor superfamily member 14
TNFRSF14	11746529_x_at	ENSG00000157873	TNF receptor superfamily member 14
TNFRSF17	11751841_a_at	ENSG00000048462	TNF receptor superfamily member 17
TNFSF11	11734306_a_at	ENSG00000120659	TNF superfamily member 11
TNIK	11739879_a_at	ENSG00000154310	TRAF2 and NCK interacting kinase
TNPO2	11733260_s_at	ENSG00000105576	transportin 2
TNRC18	11721703_s_at	ENSG00000182095	trinucleotide repeat containing 18
TNRC6A	11748942_s_at	ENSG00000090905	trinucleotide repeat containing adaptor 6A
TNRC6B	11750564_a_at	ENSG00000100354	trinucleotide repeat containing adaptor 6B
TOP1MT	11725052_a_at	ENSG00000184428	DNA topoisomerase I mitochondrial
TOP1MT	11725053_x_at	ENSG00000184428	DNA topoisomerase I mitochondrial
TOPBP1	11743823_at	ENSG00000163781	DNA topoisomerase II binding protein 1
TP53BP2	11741099_a_at	ENSG00000143514	tumor protein p53 binding protein 2
TPCN1	11718090_a_at	ENSG00000186815	two pore segment channel 1
TPD52	11745204_a_at	ENSG00000076554	tumor protein D52
TPK1	11724434_a_at	ENSG00000196511	thiamin pyrophosphokinase 1
TPK1	11724435_a_at	ENSG00000196511	thiamin pyrophosphokinase 1
TPP1	11725032_a_at	ENSG00000166340	tripeptidyl peptidase 1
TPP1	11752817_s_at	ENSG00000166340	tripeptidyl peptidase 1
TPP1	11753249_x_at	ENSG00000166340	tripeptidyl peptidase 1
TPTE2	11740824_a_at	ENSG00000132958	transmembrane phosphoinositide 3-phosphatase and tensin homolog 2
TRAPPC2L	11764016_a_at	ENSG00000167515	trafficking protein particle complex subunit 2L
TRAV12-2	11763241_x_at	ENSG00000211789	T cell receptor alpha variable 12-2
TRAV21	11763006_s_at	ENSG00000211801	T cell receptor alpha variable 21
TRIM22	11722368_a_at	ENSG00000132274	tripartite motif containing 22
TRIM22	11722369_x_at	ENSG00000132274	tripartite motif containing 22
TRIM22	11722370_a_at	ENSG00000132274	tripartite motif containing 22
TRIM22	11722371_x_at	ENSG00000132274	tripartite motif containing 22
TRIM22	11750170_a_at	ENSG00000132274	tripartite motif containing 22
TRIM26	11747321_a_at	ENSG00000234127	tripartite motif containing 26
TRIM33	11720260_a_at	ENSG00000197323	tripartite motif containing 33
TRIM45	11758380_s_at	ENSG00000134253	tripartite motif containing 45
TSC22D2	11748214_a_at	ENSG00000196428	TSC22 domain family member 2
TSC22D2	11750085_a_at	ENSG00000196428	TSC22 domain family member 2
TSC22D3	11717830_a_at	ENSG00000157514	TSC22 domain family member 3
TSC22D3	11751415_a_at	ENSG00000157514	TSC22 domain family member 3
TSPAN33	11721184_at	ENSG00000158457	tetraspanin 33
TTI2	11727041_a_at	ENSG00000129696	TELO2 interacting protein 2
TTYH3	11739151_a_at	ENSG00000136295	tweety family member 3
TUBGCP6	11755765_a_at	ENSG00000128159	tubulin gamma complex associated protein 6
TXLNB	11725893_at	ENSG00000164440	taxilin beta
TXNIP	11748543_a_at	ENSG00000265972	thioredoxin interacting protein
TXNRD1	11715650_a_at	ENSG00000198431	thioredoxin reductase 1
TXNRD1	11750416_a_at	ENSG00000198431	thioredoxin reductase 1
TYW1	11749623_s_at	ENSG00000198874	tRNA-yW synthesizing protein 1 homolog
TYW1B	11749623_s_at	ENSG00000277149	tRNA-yW synthesizing protein 1 homolog B
U2AF1L4	11760382_x_at	ENSG00000161265	U2 small nuclear RNA auxiliary factor 1 like 4
UBA7	11718608_at	ENSG00000182179	ubiquitin like modifier activating enzyme 7
UBAP2	11762055_at	ENSG00000137073	ubiquitin associated protein 2
UBE2I	11763635_s_at	ENSG00000103275	ubiquitin conjugating enzyme E2 I
UBE2Z	11716650_a_at	ENSG00000159202	ubiquitin conjugating enzyme E2 Z
UGT2B28	11715216_s_at	ENSG00000135226	UDP glucuronosyltransferase family 2 member B28
UMAD1	11745907_at	ENSG00000219545	UBAP1-MVB12-associated (UMA) domain containing 1
URM1	11717280_a_at	ENSG00000167118	ubiquitin related modifier 1
USP11	11727035_at	ENSG00000102226	ubiquitin specific peptidase 11
USP20	11720891_a_at	ENSG00000136878	ubiquitin specific peptidase 20
USP21	11739259_a_at	ENSG00000143258	ubiquitin specific peptidase 21
USP47	11743614_a_at	ENSG00000170242	ubiquitin specific peptidase 47
USP9X	11725329_a_at	ENSG00000124486	ubiquitin specific peptidase 9 X-linked
UTF1	11738673_at	ENSG00000171794	undifferentiated embryonic cell transcription factor 1
UTP6	11733343_a_at	ENSG00000108651	UTP6 small subunit processome component
UVSSA	11724140_a_at	ENSG00000163945	UV stimulated scaffold protein A
VAPA	11725316_x_at	ENSG00000101558	VAMP associated protein A
VCP	11733010_a_at	ENSG00000165280	valosin containing protein
VCP	11745875_x_at	ENSG00000165280	valosin containing protein
VCP	11746412_x_at	ENSG00000165280	valosin containing protein
VGLL4	11715977_a_at	ENSG00000144560	vestigial like family member 4
VPS13C	11748649_a_at	ENSG00000129003	vacuolar protein sorting 13 homolog C
VPS13D	11717707_s_at	ENSG00000048707	vacuolar protein sorting 13 homolog D
VPS39	11754727_a_at	ENSG00000166887	VPS39 subunit of HOPS complex
VWA3B	11746152_a_at	ENSG00000168658	von Willebrand factor A domain containing 3B
VWA5A	11748507_a_at	ENSG00000110002	von Willebrand factor A domain containing 5A
WASF2	11716245_at	ENSG00000158195	WASP family member 2
WASHC2A	11723067_s_at	ENSG00000099290	WASH complex subunit 2A
WASHC2C	11723067_s_at	ENSG00000172661	WASH complex subunit 2C
WASHC4	11722628_at	ENSG00000136051	WASH complex subunit 4
WDFY2	11726722_at	ENSG00000139668	WD repeat and FYVE domain containing 2
WDR3	11751592_a_at	ENSG00000065183	WD repeat domain 3
WDR62	11763601_x_at	ENSG00000075702	WD repeat domain 62
WDR81	11744485_a_at	ENSG00000167716	WD repeat domain 81
WDR91	11755363_a_at	ENSG00000105875	WD repeat domain 91
WNK1	11737175_at	ENSG00000060237	WNK lysine deficient protein kinase 1
WNT5B	11719441_a_at	ENSG00000111186	Wnt family member 5B
WNT7B	11725941_at	ENSG00000188064	Wnt family member 7B
XPNPEP1	11748020_a_at	ENSG00000108039	X-prolyl aminopeptidase 1
XPO7	11739121_a_at	ENSG00000130227	exportin 7
YTHDC1	11717002_a_at	ENSG00000083896	YTH N6-methyladenosine RNA binding protein C1
YY1	11758915_a_at	ENSG00000100811	YY1 transcription factor
YY1	11764091_x_at	ENSG00000100811	YY1 transcription factor
ZBTB20	11736745_a_at	ENSG00000181722	zinc finger and BTB domain containing 20
ZBTB20	11763449_a_at	ENSG00000181722	zinc finger and BTB domain containing 20
ZBTB48	11756492_a_at	ENSG00000204859	zinc finger and BTB domain containing 48
ZBTB6	11729725_at	ENSG00000186130	zinc finger and BTB domain containing 6
ZC3H7A	11720155_a_at	ENSG00000122299	zinc finger CCCH-type containing 7A
ZC3HAV1	11717366_at	ENSG00000105939	zinc finger CCCH-type containing, antiviral 1
ZC3HAV1	11717367_at	ENSG00000105939	zinc finger CCCH-type containing, antiviral 1
ZC4H2	11753382_a_at	ENSG00000126970	zinc finger C4H2-type containing
ZDHHC17	11721521_at	ENSG00000186908	zinc finger DHHC-type palmitoyltransferase 17
ZDHHC7	11730431_a_at	ENSG00000153786	zinc finger DHHC-type palmitoyltransferase 7
ZDHHC7	11730432_s_at	ENSG00000153786	zinc finger DHHC-type palmitoyltransferase 7
ZFHX3	11726523_s_at	ENSG00000140836	zinc finger homeobox 3
ZFP36L2	11715816_at	ENSG00000152518	ZFP36 ring finger protein like 2
ZKSCAN3	11733387_a_at	ENSG00000189298	zinc finger with KRAB and SCAN domains 3
ZKSCAN4	11724584_at	ENSG00000187626	zinc finger with KRAB and SCAN domains 4
ZMIZ1	11720334_a_at	ENSG00000108175	zinc finger MIZ-type containing 1
ZMYND8	11730841_a_at	ENSG00000101040	zinc finger MYND-type containing 8
ZMYND8	11757674_x_at	ENSG00000101040	zinc finger MYND-type containing 8
ZNF106	11716677_x_at	ENSG00000103994	zinc finger protein 106
ZNF136	11736278_a_at	ENSG00000196646	zinc finger protein 136
ZNF148	11745436_a_at	ENSG00000163848	zinc finger protein 148
ZNF224	11731741_at	ENSG00000267680	zinc finger protein 224
ZNF225	11739987_x_at	ENSG00000256294	zinc finger protein 225
ZNF22-AS1	11732509_a_at	ENSG00000165511	ZNF22 antisense RNA 1
ZNF24	11723260_s_at	ENSG00000172466	zinc finger protein 24
ZNF252P	11745998_at	ENSG00000291080	zinc finger protein 252, pseudogene
ZNF264	11758551_s_at	ENSG00000083844	zinc finger protein 264
ZNF337	11747302_s_at	ENSG00000130684	zinc finger protein 337
ZNF354C	11727344_at	ENSG00000177932	zinc finger protein 354C
ZNF362	11736232_at	ENSG00000160094	zinc finger protein 362
ZNF367	11728102_a_at	ENSG00000165244	zinc finger protein 367
ZNF414	11729269_a_at	ENSG00000133250	zinc finger protein 414
ZNF417	11734292_x_at	ENSG00000173480	zinc finger protein 417
ZNF418	11734987_a_at	ENSG00000196724	zinc finger protein 418
ZNF419	11740122_a_at	ENSG00000105136	zinc finger protein 419
ZNF573	11754898_a_at	ENSG00000189144	zinc finger protein 573
ZNF578	11734102_x_at	ENSG00000258405	zinc finger protein 578
ZNF665	11740569_x_at	ENSG00000197497	zinc finger protein 665
ZNF675	11715154_s_at	ENSG00000197372	zinc finger protein 675
ZNF780B	11740630_a_at	ENSG00000128000	zinc finger protein 780B
ZNF846	11736991_a_at	ENSG00000196605	zinc finger protein 846
ZNF862	11723822_a_at	ENSG00000106479	zinc finger protein 862
ZP2	11750497_a_at	ENSG00000103310	zona pellucida glycoprotein 2
ZSCAN18	11747838_a_at	ENSG00000121413	zinc finger and SCAN domain containing 18
ZSCAN18	11761049_x_at	ENSG00000121413	zinc finger and SCAN domain containing 18
ZSCAN26	11747522_a_at	ENSG00000197062	zinc finger and SCAN domain containing 26
AAK1	11736633_at	ENSG00000115977	AP2 associated kinase 1
	11715978_a_at	ENSG00000285565	novel transcript
	11716908_a_at	ENSG00000249141	novel protein
	11718401_a_at	ENSG00000288725	novel protein
	11718566_s_at	ENSG00000244701	novel transcript, antisense to AGK
	11718603_a_at	ENSG00000251660	novel transcript
	11718772_at	ENSG00000264058	novel transcript
	11718775_a_at	ENSG00000224722	serine/arginine repetitive matrix 1 (SRRM1) pseudogene
	11722314_a_at	ENSG00000273217	novel protein
	11722640_s_at	ENSG00000213727	single stranded DNA binding protein 3 (SSBP3) pseudogene
	11722640_s_at	ENSG00000217289	single stranded DNA binding protein 3 (SSBP3) pseudogene
	11724163_at	ENSG00000250264	novel protein, TAP2-HLA-DOB readthrough
	11725032_a_at	ENSG00000285338	novel transcript
	11728930_at	ENSG00000259060	novel protein
	11732168_x_at	ENSG00000292277	novel protein
	11732509_a_at	ENSG00000293022	novel transcript
	11736157_a_at	ENSG00000290424	novel transcript
	11736621_a_at	ENSG00000272980	novel protein
	11737464_a_at	ENSG00000258728	novel protein (GALT-IL11RA readthrough)
	11738002_a_at	ENSG00000290854	novel transcript
	11738058_s_at	ENSG00000282988	novel protein
	11739290_a_at	ENSG00000285827	novel protein
	11741510_a_at	ENSG00000261114	novel transcript, sense intronic to HERPUD1
	11742324_a_at	ENSG00000289698	novel transcript, sense intronic to CASP8
	11742497_x_at	ENSG00000290734	novel transcript
	11742876_a_at	ENSG00000284431	novel protein
	11744820_a_at	ENSG00000213963	novel transcript
	11746235_a_at	ENSG00000188223	novel protein
	11748143_x_at	ENSG00000285779	novel protein
	11748256_s_at	ENSG00000290968	novel transcript
	11748256_s_at	ENSG00000291283	novel transcript
	11748555_a_at	ENSG00000273345	novel transcript
	11748916_x_at	ENSG00000215861	phosphodiesterase 4D interacting protein (myomegalin) (PDE4DIP) pseudogene
	11748916_x_at	ENSG00000274642	phosphodiesterase 4D interacting protein (PDE4DIP) pseudogene
	11748916_x_at	ENSG00000291233	novel transcript
	11749257_a_at	ENSG00000261114	novel transcript, sense intronic to HERPUD1
	11749261_a_at	ENSG00000285053	novel protein, GGPS1-TBCE readthrough
	11749600_a_at	ENSG00000254979	novel protein
	11750374_a_at	ENSG00000273217	novel protein
	11750375_a_at	ENSG00000273217	novel protein
	11750634_x_at	ENSG00000286185	novel protein, identical to neuroblastoma breakpoint family, member 19 NBPF19
	11751853_s_at	ENSG00000264545	novel transcript
	11752105_x_at	ENSG00000272980	novel protein
	11753194_s_at	ENSG00000241489	novel protein
	11754223_at	ENSG00000271741	novel transcript, ZMYM6-ZMYM6NB readthrough
	11754602_a_at	ENSG00000256407	novel transcript
	11757271_s_at	ENSG00000279423	TEC
	11757369_s_at	ENSG00000269242	novel transcript
	11759879_a_at	ENSG00000225477	isocitrate dehydrogenase 3 (NAD+) gamma (IDH3G) pseudogene
	11760464_x_at	ENSG00000259115	novel transcript
	11760600_at	ENSG00000232748	novel transcript, antisense to ZNF668
	11760627_a_at	ENSG00000291055	novel transcript
	11761651_at	ENSG00000255537	novel transcript, antisense to FEZ1
	11763336_at	ENSG00000235859	proteasome (prosome, macropain) 26S subunit, ATPase, 5 (PSMC5) pseudogene
	11763532_at	ENSG00000245482	novel transcript, antisense to ALG10
	11763857_x_at	ENSG00000268193	novel transcript

## Sheet: Unique Genes
A1CF
ABCA6
ABCA8
ABCC4
ABI1
ACIN1
ACOX3
ACP3
ACSS1
ADAM17
ADAM23
ADAMTSL2
ADAR
ADCY1
ADD1
ADGRE2
ADGRF1
ADPRH
AFF3
AFTPH
AGO1
AGPS
AIM2
AKAP10
AKAP13
AKR1B10
ALDH4A1
ALOX15B
AMBP
AMPD1
AMPD3
ANK1
ANK2
ANKFY1
ANKRD11
ANKRD11P2
ANKRD12
ANKS4B
ANKZF1
ANPEP
ANXA13
AP2M1
AP3M2
APC
APCDD1L
APCS
APH1A
APH1B
API5
APOBEC3C
APOBEC3F
APOL1
AQP2
AQP5
AQR
ARHGAP15
ARHGAP26
ARHGAP4
ARHGAP45
ARHGEF1
ARID1A
ASAP1
ASB13
ASB7
ASXL2
ATG14
ATM
ATP10D
ATP13A5
ATP1A2
ATP6V1G2-DDX39B
ATRX
ATXN2
ATXN2L
ATXN3L
ATXN7
BACH2
BBS9
BBX
BCAP29
BCLAF1
BHLHE41
BIRC3
BIVM-ERCC5
BLK
BMF
BRD2
BRD4
BSDC1
BST2
BTLA
BTN2A1
BTN2A2
BUB3
C12orf40
C16orf82
C1orf198
C1QTNF9B
C2CD3
C6orf62
C6orf89
C7
C9orf153
CAB39L
CACNA2D4
CAMK1D
CAMKK2
CARTPT
CASP10
CASP8
CASQ1
CBLIF
CBLN3
CCDC150
CCDC159
CCDC191
CCL22
CCNG2
CCR6
CD1C
CD200R1
CD22
CD276
CD34
CD40
CD40LG
CD44
CD47
CD72
CDC42EP1
CDC5L
CDK10
CDKL3
CDX1
CEACAM21
CELA2B
CELF1
CELF2
CELSR1
CENPBD1P
CEP128
CEP57
CEP68
CES2
CFAP97
CFLAR
CHD9
CHERP
CHMP1A
CHRDL2
CHST11
CIB2
CINP
CIZ1
CKAP5
CLIC2
CLIP3
CLPTM1
CLPX
CNNM4
CNOT2
CNTRL
COCH
COL1A1
COL4A6
COL6A1
COPE
COPS7A
COQ4
CORO2A
CPSF1
CPSF7
CRACDL
CREB3L2
CREBRF
CRIM1
CRKL
CSAG1
CSF1R
CTF1
CTLA4
CTNNB1
CTR9
CTSH
CXCL14
CXCL16
CXXC1
CYB561
CYB5RL
CYLD
CYP11B1
CYP2B6
CYP2C8
CYP2C9
CYP2U1
D2HGDH
DBNL
DBP
DCC
DCLK2
DCLK3
DCP1A
DCX
DDB1
DDB2
DDX23
DDX39B
DENND11
DENND1B
DGAT2L6
DGLUCY
DHX38
DIPK2A
DMPK
DNAJC5
DNAJC6
DOCK10
DOK1
DOK3
DTNA
DUSP10
DUSP18
DZIP3
DAAM1
EAF1
EDARADD
EDDM3A
EDEM1
EIF2AK1
ELMO1
ELP3
EMX1
ENDOU
ENO1P1
EOLA1-DT
EOLA2-DT
EPB41L1
EPB41L2
EPB41L3
EPC1
EPN2
EPN3
EPS15
EPS8
ERAP1
ERCC3
ERCC5
ESR1
ESRRG
ETV1
ETV5
ETV7
EXOC4
EXOC7
EZH1
F2R
FAF1
FAM117A
FAM120B
FAM169A
FAM20B
FAM81A
FAM83A-AS1
FAXDC2
FBLN5
FBXO4
FCAMR
FCER2
FCGR2B
FCHO2
FCHSD1
FCMR
FCRL2
FCRL5
FCRLA
FERD3L
FFAR1
FGFR1
FHIT
FIG4
FLI1
FMNL2
FNBP1
FNBP4
FOXO3
FOXO3B
FUCA1
FXYD2
FXYD6-FXYD2
GAB1
GABRR3
GALM
GALNT11
GALNT13
GAS6
GATAD2B
GATM
GBA1
GBAP1
GC
GFRA2
GGA1
GGA2
GGNBP2
GGT5
GLG1
GLI2
GLS2
GLYR1
GM2A
GNA12
GOLM2
GOLPH3
GPBP1L1
GPR107
GRHL2
GRIA4
GRM7
GSTM5
H1-5
H2AC7
H2BC26
H3-7
H3C13
H3C14
H3C15
H3P4
HCFC1
HECTD4
HERPUD1
HEXD
HIC1
HIF1AN
HLA-DOA
HLA-DOB
HLF
HNRNPCL2
HNRNPCL3
HNRNPCL4
HNRNPD
HPX
HUWE1
HVCN1
HYDIN
HYDIN2
ICOS
IFFO1
IGFBP5
IGKV1-5
IGLV1-41
IGLV1-51
IL10RA
IL11RA
IL16
IL34
IL4I1
IL7R
INMT-MINDY4
INO80D
INPP5E
INTS14
INTS4
INTS6
INTS6L
INTS6P1
IRF3
IRF5
ITGA5
ITGBL1
IVD
IVL
JADE2
JAZF1
JCHAIN
KAT7
KAT7P1
KBTBD11
KCNQ2
KCNS1
KCNV1
KCTD12
KDM2B
KDM3A
KDM4C
KDM5A
KHDRBS2
KHNYN
KIF5C
KIR2DL1
KIAA0586
KLF11
KLF13
KLF16
KLF7
KLHL12
KLHL9
KLK12
KMT2A
KMT2E
KRTAP4-9
LAMP3
LASP1
LEPR
LGMN
LHFPL6
LHPP
LIG1
LIMK1
LIN37
LIPH
LMO3
LOXL3
LPIN2
LRCH1
LRP4
LRRIQ1
LRRTM2
LTBP2
LY75
MACF1
MAFB
MAGEC1
MAN2B1
MANBA
MAP3K14-AS1
MAP3K3
MAPK13
MAPRE2
MAPT
MARCHF4
MARF1
MARS1
MASP1
MATN2
MAU2
MBD1
MBD4
MBNL2
MCM3AP
MED24
MED6
MEF2D
MEI1
METTL16
METTL3
MFAP4
MGAT4A
MICA
MICAL2
MID1
MIDN
MIGA1
MINDY4
MIR5193
MIR5196
MIR939
MKRN2
MLLT6
MLN
MLXIP
MMP1
MOBP
MOG
MPP1
MPZL1
MR1
MROH7
MROH7-TTC4
MRPS5
MS4A2
MSC-AS1
MSL2
MSX1
MTAP
MTM1
MTMR2
MTMR9
MTURN
MVB12B
MXRA8
MYCBP2
MYO18A
MYO1H
N4BP2L1
NACAD
NALCN
NANOS2
NAP1L4
NASP
NBPF1
NBPF10
NBPF11
NBPF12
NBPF14
NBPF15
NBPF19
NBPF20
NBPF25P
NBPF26
NBPF8
NBPF9
NBR1
NBR2
NCEH1
NCOA3
NCOR1
NDE1
NDRG1
NECAP2
NEGR1
NEK9
NELL1
NEMF
NF1
NFATC4
NFE2L1
NFIC
NFKB1
NIBAN3
NIN
NOP14
NOTCH2
NOVA1
NPAT
NPPC
NPR3
NR1D1
NR1D2
NRAP
NRBP1
NRG3
NRP1
NRP2
NSF
NTM
NUDT21
NUMA1
NUP43
NUP50
NUP58
NUP62
ODAD3
OGA
OPHN1
OR10A5
OR10H1
OR10H2
OR3A2
OS9
OSBPL9
P2RX5
P2RY1
P2RY14
PAG1
PAH
PAIP1P1
PANX2
PAPLN
PARP1
PATZ1
PAX6
PBX4
PCDHA6
PDE4DIP
PDE4DIPP2
PDE7A
PDIA6
PDZRN3
PER3
PGAP3
PGR
PHC3
PHF14
PHKA2
PI16
PIAS1
PIGR
PIK3IP1
PIK3R1
PIP4K2A
PIP4K2B
PIWIL4
PKM
PLA2G15
PLA2R1
PLCXD3
PLEKHA2
PLXND1
PMM2
PNISR
PNLIPRP1
PNOC
POGK
POLM
POLR2D
POT1
POU1F1
POU2F1
PPARD
PPDPF
PPFIA4
PPM1M
PPP1R21
PPP2R1A
PPP2R3B
PPP6R3
PPT1
PPWD1
PQBP1
PRCP
PRKCQ
PRKCSH
PRKX
PRKY
PRM1
PRMT2
PROB1
PRPF3
PRPF6
PRR14L
PRRC2B
PRRC2C
PRUNE1
PSEN1
PSMD13
PSMD2
PSME1
PTBP3
PTDSS1
PTGFR
PTGR3
PTGS1
PTPN7
PTPRD
PTPRJ
PTPRS
PUM2
PXN
PXYLP1
QNG1
RAB2B
RAB30
RAB7A
RABEP1
RABEP2
RAD17
RAD52
RAPGEF4
RAPGEF6
RASGEF1A
RASGRF1
RASL12
RBBP6
RBM22
RBM6
RBMS3
RBP5
RBPJ
RCBTB2
REEP5
REL
RETNLB
RFTN1
RFX4
RFX5
RGL1
RGS1
RHOF
RIN2
RNASE11
RNASET2
RNF220
RNF222
RNF6
RNGTT
RNU1-149P
RPRD2
RRM2B
RRN3
RTF1
RUBCN
RUNX1
RYR1
S100A7L2
SCRN1
SEC61A1
SECISBP2
SEPTIN2
SEPTIN6
SERHL
SERHL2
SERPINB9
SESN1
SETBP1
SETD1B
SF3B1
SFRP1
SGMS1
SGSH
SGSM3
SH3TC2
SHPRH
SIGLEC1
SIGLEC6
SIMC1
SIMC1P1
SIN3A
SLAMF1
SLAMF8
SLC10A7
SLC15A3
SLC17A9
SLC1A2
SLC1A4
SLC1A5
SLC22A18
SLC25A12
SLC27A6
SLC33A1
SLC35C2
SLC38A4
SLC39A1
SLC39A14
SLC39A3
SLC39A9
SLC43A3
SLC46A3
SLC9A9
SLIT1
SMAD6
SMAD7
SMARCA4
SMARCC2
SMARCE1
SMYD2
SNAI3
SNHG17
SNHG32
SNORA70
SNORA71A
SNORD52
SNORD84
SNRNP200
SNRNP35
SNTN
SNW1
SNX18
SNX29
SNX33
SNX6
SOD3
SORBS3
SP1
SP100
SPANXN2
SPATA18
SPECC1L
SPIDR
SPINT2
SPRED1
SPRED2
SREK1IP1
SRRM1
SRRM1P3
SS18
SSBP3
SSBP3P1
SSH1
SSPN
SSR1
SSX6P
ST14
ST3GAL4
ST6GAL1
ST8SIA1
STAG3
STAP1
STARD3
STARD5
STAT1
STX16
SUMO4
SUPT3H
SVEP1
SYNE1
SYVN1
TACC1
TACSTD2
TAF6
TAPBP
TAS2R46
TBC1D22A
TBC1D2B
TBC1D4
TBC1D9B
TBCD
TBCE
TBX18
TBX5
TCEANC2
TCF12
TCF4
TECTA
TEF
TEX35
TFAP2A
TFCP2
TGFBR2
TGOLN2
TIAM1
TICAM2
TLE3
TLK2
TLR10
TLR5
TLR7
TMBIM6
TMC1
TMCC2
TMED7-TICAM2
TMEM106A
TMEM130
TMEM169
TMEM176B
TMEM183A
TMEM185A
TMEM185AP1
TMEM245
TMEM248
TMEM254
TMEM26
TMEM35B
TMX1
TNFRSF11A
TNFRSF14
TNFRSF17
TNFSF11
TNIK
TNPO2
TNRC18
TNRC6A
TNRC6B
TOP1MT
TOPBP1
TP53BP2
TPCN1
TPD52
TPK1
TPP1
TPTE2
TRAPPC2L
TRAV12-2
TRAV21
TRIM22
TRIM26
TRIM33
TRIM45
TSC22D2
TSC22D3
TSPAN33
TTI2
TTYH3
TUBGCP6
TXLNB
TXNIP
TXNRD1
TYW1
TYW1B
U2AF1L4
UBA7
UBAP2
UBE2I
UBE2Z
UGT2B28
UMAD1
URM1
USP11
USP20
USP21
USP47
USP9X
UTF1
UTP6
UVSSA
VAPA
VCP
VGLL4
VPS13C
VPS13D
VPS39
VWA3B
VWA5A
WASF2
WASHC2A
WASHC2C
WASHC4
WDFY2
WDR3
WDR62
WDR81
WDR91
WNK1
WNT5B
WNT7B
XPNPEP1
XPO7
YTHDC1
YY1
ZBTB20
ZBTB48
ZBTB6
ZC3H7A
ZC3HAV1
ZC4H2
ZDHHC17
ZDHHC7
ZFHX3
ZFP36L2
ZKSCAN3
ZKSCAN4
ZMIZ1
ZMYND8
ZNF106
ZNF136
ZNF148
ZNF224
ZNF225
ZNF22-AS1
ZNF24
ZNF252P
ZNF264
ZNF337
ZNF354C
ZNF362
ZNF367
ZNF414
ZNF417
ZNF418
ZNF419
ZNF573
ZNF578
ZNF665
ZNF675
ZNF780B
ZNF846
ZNF862
ZP2
ZSCAN18
ZSCAN26
AAK1

## Sheet: Reactome
Term	Overlap	P-value	Adjusted p-value	Odds Ratio	Combined Score	Genes
RNA Polymerase II Transcription R-HSA-73857	112/1312	7.92076e-10	1.0099e-06	1.98807	41.6627	ZNF573;RBPJ;YY1;PPP2R1A;PSMD2;SESN1;EPC1;PIP4K2A;PIP4K2B;SMARCC2;H2AC7;MED6;NRBP1;RUNX1;SRRM1;DDX39B;PSME1;TXNIP;PRKCQ;PGR;ZNF675;BLK;KMT2E;NOTCH2;CSF1R;KMT2A;PSMD13;CTR9;RTF1;FOXO3;NDRG1;MOBP;SMYD2;ZKSCAN3;TP53BP2;DHX38;ZKSCAN4;ZNF665;TFAP2A;ZFHX3;CPSF7;UBE2I;POU2F1;CPSF1;ABCA6;SETD1B;EAF1;NR1D2;ESRRG;NR1D1;SMAD6;PHC3;ESR1;NFKB1;SMARCA4;SMAD7;COL1A1;SNW1;ZNF419;AGO1;ZNF418;CNOT2;ZNF417;INTS4;ITG…
Gene Expression (Transcription) R-HSA-74160	119/1449	2.25082e-09	1.4349e-06	1.90791	37.9903	ZNF573;RBPJ;YY1;PPP2R1A;PSMD2;SESN1;EPC1;PIP4K2A;PIP4K2B;SMARCC2;H2AC7;MED6;NRBP1;RUNX1;SRRM1;DDX39B;PSME1;TXNIP;PRKCQ;PGR;ZNF675;BLK;KMT2E;NOTCH2;CSF1R;KMT2A;PSMD13;CTR9;RTF1;FOXO3;NDRG1;MOBP;SMYD2;ZKSCAN3;TP53BP2;DHX38;ZKSCAN4;ZNF665;TFAP2A;ZFHX3;CPSF7;UBE2I;POU2F1;CPSF1;ABCA6;SETD1B;EAF1;NR1D2;ESRRG;NR1D1;SMAD6;PHC3;ESR1;NFKB1;SMARCA4;SMAD7;COL1A1;SNW1;ZNF419;AGO1;ZNF418;CNOT2;ZNF417;INTS4;ITG…
Generic Transcription Pathway R-HSA-212436	96/1190	2.15267e-07	9.14885e-05	1.84504	28.3239	ZNF573;RBPJ;GLI2;YY1;H2BC26;CASP10;SIN3A;PPP2R1A;PSMD2;SESN1;CTLA4;EPC1;PIP4K2A;PIP4K2B;TOPBP1;BRD2;SMARCC2;PARP1;H2AC7;TCF12;ARID1A;MED6;NRBP1;DDB2;RUNX1;MED24;NCOR1;RRM2B;PSME1;TXNIP;PRKCQ;PGR;ITGA5;ZNF675;PPARD;BLK;KMT2E;NOTCH2;CSF1R;KMT2A;PSMD13;GLS2;CXXC1;FOXO3;NDRG1;H3C13;MOBP;POLR2D;SMYD2;ZKSCAN3;TP53BP2;ZKSCAN4;ZNF225;ZNF665;ZNF224;TFAP2A;SMARCE1;MBD4;ZFHX3;UBE2I;ABCA6;STAT1;USP9X;SETD1B;…
Immune System R-HSA-168256	132/1943	1.39952e-05	0.00446097	1.53608	17.1685	UBE2Z;CRKL;KIF5C;PPP2R1A;PSMD2;ANPEP;FBXO4;TNFSF11;TRIM26;HLA-DOA;HLA-DOB;AP2M1;TRIM22;NANOS2;IL11RA;ATG14;MID1;PIAS1;ARHGAP45;ADAM17;MTAP;DOK3;PSME1;ELMO1;TXNIP;PRKCQ;MASP1;BLK;CSF1R;VCP;UBA7;PSMD13;HVCN1;TNFRSF11A;PIK3R1;PSEN1;FOXO3;CD1C;BTLA;TNFRSF17;TNFRSF14;ICOS;PAG1;POU2F1;BTN2A2;BTN2A1;FUCA1;NFKB1;SMARCA4;SMAD7;BST2;CYLD;REL;MAN2B1;IL7R;DZIP3;CD22;LGMN;RNF220;PIGR;CD40;PRKCSH;PTPRJ;ADAR;SE…
Processing Of Capped Intron-Containing Pre-mRNA R-HSA-72203	27/242	3.50871e-05	0.00851395	2.56265	26.2868	DDX23;PPWD1;PQBP1;U2AF1L4;NUP62;POLR2D;DHX38;NUP43;SNRNP35;SF3B1;AQR;CPSF7;CPSF1;METTL3;CDC5L;SRRM1;CHERP;NUDT21;SNW1;PRPF6;DDX39B;PRPF3;NUP50;HNRNPD;SNRNP200;NUP58;RBM22
Transcriptional Regulation By RUNX1 R-HSA-8878171	24/204	4.00657e-05	0.00851395	2.71706	27.5102	BLK;KMT2E;SMARCE1;SMARCC2;KMT2A;H2AC7;PSMD13;SETD1B;TCF12;ARID1A;PHC3;ESR1;RUNX1;SMARCA4;H2BC26;H3C13;SIN3A;PSMD2;AGO1;PSME1;CTLA4;PRKCQ;TNRC6A;TNRC6B
RUNX1 Regulates Genes Involved In Megakaryocyte Differentiation And Platelet Function R-HSA-8936459	12/66	5.65215e-05	0.010295	4.50036	44.0175	KMT2E;H2BC26;KMT2A;H3C13;SIN3A;H2AC7;SETD1B;AGO1;PRKCQ;TNRC6A;RUNX1;TNRC6B
Chromatin Modifying Enzymes R-HSA-3247509	26/238	6.9407e-05	0.0110617	2.50035	23.9421	KMT2E;KDM5A;KDM3A;KMT2A;JADE2;H2BC26;H3C13;ATXN7;SMYD2;EPC1;KAT7;SMARCE1;SMARCC2;KDM4C;KDM2B;H2AC7;SETD1B;MSL2;ELP3;ARID1A;SUPT3H;GATAD2B;NFKB1;HCFC1;SMARCA4;NCOR1
Regulated Proteolysis Of p75NTR R-HSA-193692	5/11	8.69623e-05	0.0119235	16.7937	157.021	APH1A;ADAM17;APH1B;PSEN1;NFKB1
Nuclear Signaling By ERBB4 R-HSA-1251985	8/32	9.55155e-05	0.0119235	6.73248	62.3174	APH1A;ADAM17;APH1B;NCOR1;NRG3;PGR;PSEN1;ESR1
Signaling By NOTCH R-HSA-157118	23/203	0.000102869	0.0119235	2.60104	23.8829	NOTCH2;TLE3;PLXND1;STAT1;H2AC7;PSMD13;PSEN1;RBPJ;RUNX1;APH1A;FCER2;ADAM17;APH1B;SNW1;NCOR1;H2BC26;H3C13;PSMD2;AGO1;PSME1;ST3GAL4;TNRC6A;TNRC6B
mRNA Splicing R-HSA-72172	21/189	0.000265114	0.0281683	2.54064	20.923	AQR;CPSF7;CPSF1;DDX23;PPWD1;CDC5L;SRRM1;CHERP;PQBP1;U2AF1L4;NUDT21;PRPF6;SNW1;PRPF3;POLR2D;HNRNPD;DHX38;SNRNP35;SNRNP200;SF3B1;RBM22
Cytokine Signaling In Immune System R-HSA-1280215	54/702	0.000345299	0.0338659	1.7115	13.6425	CD40;PTPRJ;ADAR;CRKL;CASP8;PPP2R1A;PSMD2;NUP62;TNFSF11;TRIM26;TRIM22;EDARADD;NANOS2;IL11RA;MMP1;IL16;MID1;PIAS1;FCER2;MTAP;ADAM17;IRF3;NUP50;PSME1;IRF5;CD44;NUP58;BIRC3;CSF1R;SP100;CTF1;UBA7;PSMD13;TNFRSF11A;PIK3R1;FOXO3;H3C13;TNFRSF17;TNFRSF14;NUP43;TRIM45;MAP3K3;CCL22;POU2F1;STAT1;IL10RA;IL34;NFKB1;SMARCA4;SMAD7;BST2;CD40LG;PTPN7;IL7R
mRNA Splicing - Major Pathway R-HSA-72163	20/181	0.00039515	0.0359869	2.52307	19.7714	AQR;CPSF7;CPSF1;DDX23;PPWD1;CDC5L;SRRM1;CHERP;PQBP1;U2AF1L4;NUDT21;PRPF6;SNW1;PRPF3;POLR2D;HNRNPD;DHX38;SNRNP200;SF3B1;RBM22
Downregulation Of SMAD2/3:SMAD4 Transcriptional Activity R-HSA-2173795	7/31	0.000514951	0.0399091	5.88468	44.5555	NCOR1;SNW1;PARP1;STAT1;USP9X;TRIM33;SMAD7
Estrogen-dependent Gene Expression R-HSA-9018519	15/119	0.000517094	0.0399091	2.92256	22.1159	TLE3;MBD4;POU2F1;H2AC7;NCOA3;ESR1;RUNX1;YY1;H2BC26;H3C13;AGO1;POLR2D;PGR;TNRC6A;TNRC6B
Signal Transduction R-HSA-162582	151/2465	0.000532122	0.0399091	1.36684	10.3041	PLXND1;ZDHHC7;SPINT2;RBPJ;CXCL16;CRKL;YY1;DOCK10;OPHN1;RGS1;PPP2R1A;PSMD2;WDR91;ANKFY1;PIP4K2A;PIP4K2B;AP2M1;TLE3;WNT5B;FNBP1;H2AC7;F2R;RUNX1;SRRM1;ARHGAP45;CLIP3;DOK1;TIAM1;SFRP1;ADAM17;DDX39B;DAAM1;WDR81;PSME1;ELMO1;PRKCQ;PGR;NOTCH2;PTGFR;KHDRBS2;VCP;PSMD13;TAS2R46;KLHL12;PIK3R1;PSEN1;SLC1A5;FOXO3;ARHGAP15;APH1A;APH1B;ST3GAL4;ICOS;PAG1;PCDHA6;CPSF7;POU2F1;ARHGAP26;SMAD6;PHC3;ESR1;NFKB1;SMARCA4;…
Pre-NOTCH Transcription And Translation R-HSA-1912408	10/62	0.000633302	0.0448589	3.88666	28.6236	NOTCH2;H2BC26;SNW1;H3C13;H2AC7;AGO1;RBPJ;TNRC6A;RUNX1;TNRC6B
Nuclear Receptor Transcription Pathway R-HSA-383280	9/53	0.000798023	0.0535516	4.13134	29.4704	MBD4;NCOR1;PGR;ESRRG;NR1D2;NR1D1;ESR1;NRBP1;PPARD
Competing Endogenous RNAs (ceRNAs) Regulate PTEN Translation R-HSA-8948700	4/10	0.000843809	0.0537928	13.4207	94.9863	VAPA;AGO1;TNRC6A;TNRC6B
TNF Receptor Superfamily (TNFSF) Members Mediating Non-Canonical NF-kB Pathway R-HSA-5676594	5/17	0.000917495	0.0557051	8.39418	58.7077	CD40;CD40LG;TNFSF11;TNFRSF11A;BIRC3
Pre-NOTCH Expression And Processing R-HSA-1912422	11/78	0.00110495	0.0640368	3.31908	22.5961	NOTCH2;H2BC26;SNW1;H3C13;H2AC7;AGO1;ST3GAL4;RBPJ;TNRC6A;RUNX1;TNRC6B
Regulation Of PTEN mRNA Translation R-HSA-8943723	4/11	0.00127629	0.0678032	11.5029	76.6528	VAPA;AGO1;TNRC6A;TNRC6B
Synthesis Of PIPs At Late Endosome Membrane R-HSA-1660517	4/11	0.00127629	0.0678032	11.5029	76.6528	FIG4;MTMR2;MTMR9;MTM1
Signaling By ERBB4 R-HSA-1236394	9/57	0.00136772	0.0697535	3.78626	24.969	APH1A;ADAM17;NCOR1;APH1B;NRG3;PGR;PIK3R1;PSEN1;ESR1
RAC3 GTPase Cycle R-HSA-9013423	12/93	0.00148094	0.0726232	2.99597	19.519	DOCK10;TIAM1;OPHN1;NCOA3;ABI1;CDC42EP1;PIK3R1;SLC1A5;ARHGAP15;ARHGAP26;WASF2;RAB7A
Nucleotide Excision Repair R-HSA-5696398	13/108	0.00182354	0.0786548	2.76824	17.4592	AQR;INO80D;UBE2I;PARP1;COPS7A;PIAS1;DDB2;YY1;DDB1;ERCC3;UVSSA;POLR2D;ERCC5
Caspase-mediated Cleavage Of Cytoskeletal Proteins R-HSA-264870	4/12	0.00184282	0.0786548	10.0645	63.3706	CASP8;DBNL;MAPT;ADD1
Scavenging Of Heme From Plasma R-HSA-2168880	4/12	0.00184282	0.0786548	10.0645	63.3706	HPX;AMBP;APOL1;JCHAIN
Apoptotic Cleavage Of Cellular Proteins R-HSA-111465	7/38	0.0018507	0.0786548	4.5542	28.6559	CASP8;DBNL;ACIN1;CTNNB1;PRKCQ;MAPT;ADD1
RAS Signaling Downstream Of NF1 Loss-Of-Function Variants R-HSA-6802953	3/6	0.00191776	0.0788755	20.113	125.839	SPRED2;SPRED1;NF1
Apoptotic Execution Phase R-HSA-75153	8/52	0.00295339	0.11467	3.6684	21.3677	H1-5;CASP8;DBNL;ACIN1;CTNNB1;PRKCQ;MAPT;ADD1
SUMOylation Of DNA Damage Response And Repair Proteins R-HSA-3108214	10/76	0.0030955	0.11467	3.05996	17.6799	RAD52;SP100;UBE2I;PARP1;NUP50;NUP62;NUP43;PHC3;NUP58;PIAS1
Transcriptional Regulation By Small RNAs R-HSA-5578749	10/76	0.0030955	0.11467	3.05996	17.6799	H2BC26;H3C13;H2AC7;NUP50;AGO1;NUP62;POLR2D;NUP43;NUP58;TNRC6A
Interferon Gamma Signaling R-HSA-877300	11/89	0.0032367	0.11467	2.84935	16.3359	SP100;IRF3;STAT1;TRIM26;IRF5;MID1;TRIM22;CD44;PIAS1;TRIM45;SMAD7
Post-transcriptional Silencing By Small RNAs R-HSA-426496	3/7	0.00323775	0.11467	15.0839	86.4744	AGO1;TNRC6A;TNRC6B
Formation Of Incision Complex In GG-NER R-HSA-5696395	7/42	0.0033561	0.115649	4.03287	22.9752	DDB1;UBE2I;PARP1;ERCC3;ERCC5;DDB2;PIAS1
Signaling By NOTCH2 R-HSA-1980145	6/32	0.00354551	0.118961	4.65059	26.239	NOTCH2;APH1A;FCER2;APH1B;PSEN1;RBPJ
ESR-mediated Signaling R-HSA-8939211	18/188	0.00376337	0.123033	2.14491	11.9738	TLE3;MBD4;POU2F1;H2AC7;NCOA3;ZDHHC7;PIK3R1;FOXO3;ESR1;RUNX1;YY1;H2BC26;H3C13;AGO1;POLR2D;PGR;TNRC6A;TNRC6B
Amyloid Fiber Formation R-HSA-977225	10/79	0.0041136	0.131121	2.92646	16.0764	APH1A;GGA2;APCS;GGA1;H2BC26;APH1B;H3C13;H2AC7;USP9X;TSPAN33
CDC42 GTPase Cycle R-HSA-9013148	15/149	0.00491387	0.145929	2.26467	12.0383	FNBP1;PRKCSH;PIK3R1;ARHGAP26;ARHGAP45;ARHGAP4;DOCK10;TIAM1;FMNL2;OPHN1;DAAM1;WDR81;WDR91;CDC42EP1;RAB7A
Noncanonical Activation Of NOTCH3 R-HSA-9017802	3/8	0.00499822	0.145929	12.0665	63.9366	APH1A;APH1B;PSEN1
TRAIL Signaling R-HSA-75158	3/8	0.00499822	0.145929	12.0665	63.9366	CASP8;CASP10;CFLAR
Gene Silencing By RNA R-HSA-211000	12/108	0.00519652	0.145929	2.52585	13.2854	PIWIL4;H2BC26;H3C13;H2AC7;AGO1;NUP50;NUP62;POLR2D;NUP43;NUP58;TNRC6A;TNRC6B
Transcriptional Regulation By RUNX3 R-HSA-8878159	11/95	0.00535611	0.145929	2.64499	13.832	BRD2;ZFHX3;SNW1;PSMD13;PSMD2;PSME1;CXXC1;CTNNB1;RBPJ;FOXO3;RUNX1
Global Genome Nucleotide Excision Repair (GG-NER) R-HSA-5696399	10/82	0.00537933	0.145929	2.80408	14.6518	YY1;DDB1;INO80D;UBE2I;PARP1;ERCC3;COPS7A;ERCC5;DDB2;PIAS1
PI Metabolism R-HSA-1483255	10/82	0.00537933	0.145929	2.80408	14.6518	TPTE2;FIG4;MTMR2;PLEKHA2;INPP5E;PIP4K2A;MTMR9;PIP4K2B;PIK3R1;MTM1
RUNX1 Interacts With Co-Factors Whose Precise Effect On RUNX1 Targets Is Not Known R-HSA-8939243	6/35	0.00562833	0.149502	4.16883	21.5943	SMARCE1;SMARCC2;ARID1A;PHC3;RUNX1;SMARCA4
SUMO E3 Ligases SUMOylate Target Proteins R-HSA-3108232	16/168	0.00639904	0.163838	2.12983	10.7591	TFAP2A;SP100;UBE2I;PARP1;MBD1;ESR1;PHC3;HIC1;PIAS1;RAD52;SIN3A;NUP50;NUP62;PGR;NUP43;NUP58
Death Receptor Signaling R-HSA-73887	14/139	0.00642501	0.163838	2.26453	11.4303	PSEN1;CFLAR;NFKB1;CLIP3;APH1A;TIAM1;CYLD;AKAP13;ADAM17;APH1B;CASP8;CASP10;ARHGEF1;BIRC3
HDMs Demethylate Histones R-HSA-3214842	5/26	0.00684211	0.166407	4.79441	23.8985	KDM5A;KDM3A;KDM4C;H3C13;KDM2B
Interferon Signaling R-HSA-913531	18/200	0.00712478	0.166407	2.00222	9.89931	SP100;UBA7;STAT1;ADAR;MID1;PIAS1;SMAD7;BST2;IRF3;NUP50;NUP62;TRIM26;IRF5;NUP43;TRIM22;CD44;NUP58;TRIM45
DNA Repair R-HSA-73894	25/310	0.007132	0.166407	1.77952	8.79644	VCP;INO80D;UBA7;COPS7A;YY1;H2BC26;POLR2D;TOPBP1;MBD4;AQR;UBE2I;PARP1;H2AC7;POLM;SPIDR;DDB2;PIAS1;DDB1;RAD52;ERCC3;UVSSA;RAD17;POT1;ATM;ERCC5
Synthesis Of (16-20)-Hydroxyeicosatetraenoic Acids (HETE) R-HSA-2142816	3/9	0.00723432	0.166407	10.0549	49.5598	CYP2C9;CYP2C8;CYP2U1
Regulation Of RUNX1 Expression And Activity R-HSA-8934593	4/17	0.00732989	0.166407	6.1919	30.4381	AGO1;TNRC6A;RUNX1;TNRC6B
Signaling By Cytosolic FGFR1 Fusion Mutants R-HSA-1839117	4/17	0.00732989	0.166407	6.1919	30.4381	STAT1;CNTRL;MYO18A;PIK3R1
DNA Damage Recognition In GG-NER R-HSA-5696394	6/37	0.00743938	0.166407	3.89947	19.1112	YY1;DDB1;INO80D;PARP1;COPS7A;DDB2
TNFR2 Non-Canonical NF-kB Pathway R-HSA-5668541	11/100	0.00785173	0.172603	2.49573	12.0969	EDARADD;CD40;CD40LG;PSMD13;PSMD2;PSME1;TNFSF11;TNFRSF17;TNFRSF14;TNFRSF11A;BIRC3
Signaling By NOTCH3 R-HSA-9012852	7/49	0.00802397	0.173399	3.35949	16.2106	APH1A;APH1B;SNW1;PLXND1;STAT1;PSEN1;RBPJ
SUMOylation R-HSA-2990846	16/174	0.00886627	0.188408	2.0483	9.67925	TFAP2A;SP100;UBE2I;PARP1;MBD1;ESR1;PHC3;HIC1;PIAS1;RAD52;SIN3A;NUP50;NUP62;PGR;NUP43;NUP58
SUMOylation Of Ubiquitinylation Proteins R-HSA-3232142	6/39	0.00963684	0.192663	3.66275	17.0031	UBE2I;NUP50;NUP62;NUP43;NUP58;PIAS1
Transcriptional Regulation By VENTX R-HSA-8853884	6/39	0.00963684	0.192663	3.66275	17.0031	CSF1R;AGO1;CTNNB1;NFKB1;TNRC6A;TNRC6B
Synthesis Of PIPs At Plasma Membrane R-HSA-1660499	7/51	0.00996793	0.192663	3.20645	14.7765	MTMR2;PLEKHA2;PIP4K2A;MTMR9;PIP4K2B;PIK3R1;MTM1
Transcriptional Activity Of SMAD2/SMAD3:SMAD4 Heterotrimer R-HSA-2173793	7/51	0.00996793	0.192663	3.20645	14.7765	NCOR1;SNW1;PARP1;STAT1;USP9X;TRIM33;SMAD7
Zinc Influx Into Cells By SLC39 Gene Family R-HSA-442380	3/10	0.00997312	0.192663	8.61804	39.7107	SLC39A1;SLC39A14;SLC39A3
mRNA Editing R-HSA-75072	3/10	0.00997312	0.192663	8.61804	39.7107	APOBEC3C;ADAR;A1CF
Adaptive Immune System R-HSA-1280218	49/733	0.010199	0.194085	1.46026	6.69597	CD40;PTPRJ;UBE2Z;SEC61A1;PPP2R1A;KIF5C;PSMD2;FBXO4;CTLA4;CTSH;HLA-DOA;HLA-DOB;AP2M1;ATG14;TAPBP;CD200R1;PSME1;PRKCQ;RAPGEF4;RAB7A;BLK;UBA7;PSMD13;ASB13;RNF6;PIK3R1;CD1C;BTLA;TNFRSF14;RBBP6;ICOS;PAG1;MICA;BTN2A2;BTN2A1;ERAP1;HUWE1;NFKB1;KLHL9;CD40LG;REL;ASB7;SIGLEC1;FCGR2B;DZIP3;SIGLEC6;CD22;LGMN;RNF220
Phospholipid Metabolism R-HSA-1483257	18/208	0.0104865	0.196622	1.9171	8.7375	TPTE2;MTMR2;MIGA1;PLEKHA2;PRKCSH;MTMR9;PIK3R1;DGAT2L6;MTM1;FIG4;PLA2G15;PTDSS1;LIPH;INPP5E;PIP4K2A;PIP4K2B;PLA2R1;LPIN2
Apoptosis R-HSA-109581	16/178	0.0108947	0.201316	1.9973	9.02677	DBNL;PSMD13;DCC;TMED7-TICAM2;CFLAR;ADD1;H1-5;CASP8;PSMD2;PSME1;TP53BP2;ACIN1;CTNNB1;PRKCQ;BMF;MAPT
SUMOylation Of Transcription Factors R-HSA-3232118	4/19	0.0110706	0.201643	5.36575	24.1645	TFAP2A;UBE2I;HIC1;PIAS1
Metabolism Of RNA R-HSA-8953854	45/666	0.0112781	0.20253	1.47562	6.61799	PSMD13;URM1;WDR3;DDX23;PPWD1;ADAR;PQBP1;U2AF1L4;PPP2R1A;PSMD2;POLR2D;NUP62;TYW1;DHX38;NUP43;SNRNP35;SF3B1;APOBEC3C;UTP6;NOP14;AQR;CPSF7;RNGTT;CPSF1;METTL3;CDC5L;A1CF;CHERP;SRRM1;NUDT21;SNW1;PRPF6;DDX39B;ERCC3;CNOT2;DNAJC5;PRPF3;NUP50;PSME1;HNRNPD;SNRNP200;DCP1A;CD44;NUP58;RBM22
RHO GTPase Cycle R-HSA-9012999	32/441	0.0117838	0.205694	1.58874	7.05565	VCP;PLXND1;PRKCSH;PIK3R1;SLC1A5;ARHGAP15;FAM169A;ARHGAP4;DOCK10;AKAP13;OPHN1;WDR91;ANKFY1;RBBP6;WASF2;CPSF7;FNBP1;USP9X;NCOA3;RHOF;ARHGAP26;SRRM1;ARHGAP45;TIAM1;FMNL2;DAAM1;DDX39B;WDR81;ABI1;CDC42EP1;ARHGEF1;RAB7A
Diseases Of Signal Transduction By Growth Factor Receptors And Second Messengers R-HSA-5663202	31/424	0.0117985	0.205694	1.60138	7.1098	VCP;PSMD13;ZC3HAV1;PIK3R1;PSEN1;RBPJ;FOXO3;APH1A;SPRED2;SPRED1;DUSP10;APH1B;OS9;PPP2R1A;PSMD2;POLR2D;CNTRL;MYO18A;ICOS;STAT1;SYVN1;ESR1;TGFBR2;ADAM17;NCOR1;SNW1;NRG3;PSME1;NF1;CTNNB1;FGFR1
HATs Acetylate Histones R-HSA-3214847	11/106	0.0119453	0.205694	2.33737	10.3485	H2BC26;H3C13;H2AC7;ATXN7;MSL2;EPC1;KAT7;ELP3;JADE2;SUPT3H;HCFC1
Nucleotide-binding Domain, Leucine Rich Repeat Containing NLR Signaling Pathways R-HSA-168643	7/53	0.0122342	0.205694	3.06672	13.5043	CYLD;CASP8;AIM2;TXNIP;NFKB1;BIRC3;MAPK13
Binding And Uptake Of Ligands By Scavenger Receptors R-HSA-2173782	6/41	0.012261	0.205694	3.45309	15.1982	COL1A1;HPX;AMBP;MASP1;APOL1;JCHAIN
FGFR1 Mutant Receptor Activation R-HSA-1839124	5/30	0.0126798	0.207587	4.02646	17.5865	STAT1;CNTRL;MYO18A;PIK3R1;FGFR1
Signaling By Nuclear Receptors R-HSA-9006931	21/260	0.0126994	0.207587	1.77917	7.76821	MBD4;TLE3;KDM3A;POU2F1;H2AC7;NCOA3;ZDHHC7;PIK3R1;FOXO3;ESR1;RUNX1;YY1;NCOR1;H2BC26;H3C13;AGO1;POLR2D;PGR;TNRC6A;PPARD;TNRC6B
Signaling By Receptor Tyrosine Kinases R-HSA-9006934	35/496	0.0130119	0.20832	1.54242	6.69702	NRP1;NRP2;PTPRS;CXXC1;PTPRJ;SPINT2;PIK3R1;PSEN1;CRKL;APH1A;SPRED2;SPRED1;APH1B;SIN3A;PPP2R1A;POLR2D;MEF2D;WASF2;EPS15;AP2M1;PAG1;STAT1;TCF12;ESR1;MAPK13;TIAM1;ADAM17;NCOR1;NRG3;ABI1;COL6A1;ELMO1;CTNNB1;PGR;FGFR1
CYP2E1 Reactions R-HSA-211999	3/11	0.0132344	0.20832	7.54039	32.6117	CYP2C9;CYP2C8;CYP2B6
NOTCH4 Activation And Transmission Of Signal To Nucleus R-HSA-9013700	3/11	0.0132344	0.20832	7.54039	32.6117	APH1A;APH1B;PSEN1
RHOJ GTPase Cycle R-HSA-9013409	7/54	0.0134968	0.209859	3.00131	12.9215	OPHN1;FNBP1;CDC42EP1;PIK3R1;SLC1A5;ARHGAP26;RAB7A
Deubiquitination R-HSA-5688426	22/279	0.0141396	0.217205	1.73356	7.38282	USP47;VCP;INO80D;USP20;USP9X;H2AC7;PSMD13;USP11;ESR1;HCFC1;DDB2;SMAD7;TGFBR2;YY1;CYLD;ATXN3L;H2BC26;ATXN7;PSMD2;ASXL2;PSME1;BIRC3
Signaling By NOTCH4 R-HSA-9013694	9/81	0.0144901	0.217752	2.52099	10.6746	NOTCH2;APH1A;APH1B;SNW1;PSMD13;PSMD2;PSME1;PSEN1;RBPJ
Regulation Of MECP2 Expression And Activity R-HSA-9022692	5/31	0.0145414	0.217752	3.87139	16.3789	NCOR1;SIN3A;AGO1;TNRC6A;TNRC6B
UCH Proteinases R-HSA-5689603	10/95	0.0146876	0.217752	2.37359	10.0183	YY1;INO80D;H2AC7;PSMD13;PSMD2;ASXL2;PSME1;HCFC1;TGFBR2;SMAD7
Metabolism Of Lipids R-HSA-556833	48/732	0.0150949	0.221218	1.42887	5.99183	MTMR2;SGMS1;CHD9;PRKCSH;MTMR9;PIK3R1;PTGS1;MTM1;PTDSS1;GM2A;SIN3A;LIPH;FAM120B;INPP5E;PIP4K2A;PIP4K2B;GC;OSBPL9;TPTE2;GGT5;STARD3;MBD4;STARD5;UBE2I;MIGA1;PLEKHA2;TXNRD1;NCOA3;NR1D1;DGAT2L6;ALOX15B;MED6;FIG4;PLA2G15;CYP2C9;CYP2C8;MED24;NCOR1;VAPA;CYP2U1;CYP11B1;AGPS;PPT1;ACOX3;PLA2R1;LPIN2;LGMN;PPARD
Signaling By Rho GTPases R-HSA-194315	43/644	0.0156849	0.22465	1.45532	6.04695	VCP;PLXND1;PRKCSH;PIK3R1;SLC1A5;ARHGAP15;FAM169A;ARHGAP4;DOCK10;AKAP13;H2BC26;H3C13;OPHN1;PPP2R1A;WDR91;ANKFY1;RBBP6;NUP43;BUB3;WASF2;CPSF7;KDM4C;FNBP1;USP9X;H2AC7;NDE1;NCOA3;LIMK1;RHOF;ARHGAP26;CKAP5;SRRM1;ARHGAP45;TIAM1;FMNL2;DAAM1;DDX39B;WDR81;ABI1;CDC42EP1;CTNNB1;ARHGEF1;RAB7A
Neutrophil Degranulation R-HSA-6798695	33/468	0.0157038	0.22465	1.53999	6.3969	PIGR;VCP;PSMD13;PRKCSH;HVCN1;PRCP;PTPRJ;PSEN1;GM2A;PSMD2;ANPEP;CEACAM21;CTSH;ACP3;MANBA;DBNL;FUCA1;RNASET2;TMED7-TICAM2;HUWE1;AMPD3;RHOF;NFKB1;ARHGAP45;BST2;PKM;DOK3;VAPA;DNAJC5;MAN2B1;CD47;CD44;RAB7A
NOTCH2 Activation And Transmission Of Signal To Nucleus R-HSA-2979096	4/21	0.0158577	0.22465	4.73399	19.6181	NOTCH2;APH1A;APH1B;PSEN1
Transport Of Mature Transcript To Cytoplasm R-HSA-72202	9/83	0.0167992	0.229238	2.45259	10.0223	DDX39B;CPSF1;NUP50;NUP62;DHX38;NUP43;NUP58;SRRM1;U2AF1L4
NOTCH2 Intracellular Domain Regulates Transcription R-HSA-2197563	3/12	0.0170317	0.229238	6.70222	27.296	NOTCH2;FCER2;RBPJ
Passive Transport By Aquaporins R-HSA-432047	3/12	0.0170317	0.229238	6.70222	27.296	MINDY4;AQP5;AQP2
Vitamin D (Calciferol) Metabolism R-HSA-196791	3/12	0.0170317	0.229238	6.70222	27.296	UBE2I;GC;LGMN
TNF Signaling R-HSA-75893	6/44	0.0170805	0.229238	3.17997	12.9419	CLIP3;CYLD;ADAM17;CASP8;CFLAR;BIRC3
Mitotic Prophase R-HSA-68875	11/112	0.0174926	0.232324	2.19782	8.89233	NEK9;H2BC26;NUMA1;H3C13;PPP2R1A;H2AC7;NUP50;NUP62;NUP43;LPIN2;NUP58
SUMOylation Of Chromatin Organization Proteins R-HSA-4551638	7/57	0.0178412	0.234511	2.82078	11.3572	UBE2I;NUP50;NUP62;NUP43;PHC3;NUP58;PIAS1
Constitutive Signaling By NOTCH1 HD+PEST Domain Mutants R-HSA-2894862	7/58	0.0194854	0.250948	2.76533	10.8901	APH1A;ADAM17;NCOR1;APH1B;SNW1;PSEN1;RBPJ
mRNA 3-End Processing R-HSA-72187	7/58	0.0194854	0.250948	2.76533	10.8901	NUDT21;CPSF7;DDX39B;CPSF1;DHX38;SRRM1;U2AF1L4
FasL/ CD95L Signaling R-HSA-75157	2/5	0.0204777	0.258505	13.3945	52.0835	CASP8;CASP10
LRR FLII-interacting Protein 1 (LRRFIP1) Activates Type I IFN Production R-HSA-3134973	2/5	0.0204777	0.258505	13.3945	52.0835	IRF3;CTNNB1
XBP1(S) Activates Chaperone Genes R-HSA-381038	6/46	0.0209335	0.260249	3.02066	11.6791	EDEM1;CXXC1;SYVN1;SSR1;PDIA6;ADD1
Programmed Cell Death R-HSA-5357801	17/208	0.0210241	0.260249	1.79909	6.94824	DBNL;PSMD13;DCC;TMED7-TICAM2;CFLAR;ADD1;H1-5;CASP8;PSMD2;PSME1;TP53BP2;CTNNB1;ACIN1;PRKCQ;BMF;MAPT;BIRC3
TFAP2 (AP-2) Family Regulates Transcription Of Growth Factors And Their Receptors R-HSA-8866910	3/13	0.0213724	0.262018	6.03168	23.1957	TFAP2A;YY1;ESR1
RAC2 GTPase Cycle R-HSA-9013404	9/87	0.0222057	0.266654	2.32633	8.85728	DOCK10;TIAM1;OPHN1;ABI1;CDC42EP1;PIK3R1;ARHGAP26;WASF2;RAB7A
Signaling By Rho GTPases, Miro GTPases And RHOBTB3 R-HSA-9716542	43/660	0.0226903	0.266654	1.41635	5.36206	VCP;PLXND1;PRKCSH;PIK3R1;SLC1A5;ARHGAP15;FAM169A;ARHGAP4;DOCK10;AKAP13;H2BC26;H3C13;OPHN1;PPP2R1A;WDR91;ANKFY1;RBBP6;NUP43;BUB3;WASF2;CPSF7;KDM4C;FNBP1;USP9X;H2AC7;NDE1;NCOA3;LIMK1;RHOF;ARHGAP26;CKAP5;SRRM1;ARHGAP45;TIAM1;FMNL2;DAAM1;DDX39B;WDR81;ABI1;CDC42EP1;CTNNB1;ARHGEF1;RAB7A
PKMTs Methylate Histone Lysines R-HSA-3214841	6/47	0.0230641	0.266654	2.94683	11.108	KMT2E;KMT2A;H3C13;SETD1B;SMYD2;NFKB1
SUMOylation Of RNA Binding Proteins R-HSA-4570464	6/47	0.0230641	0.266654	2.94683	11.108	UBE2I;NUP50;NUP62;NUP43;PHC3;NUP58
Protein-protein Interactions At Synapses R-HSA-6794362	9/88	0.023732	0.266654	2.29676	8.59203	PTPRD;PTPRS;DBNL;EPB41L1;EPB41L2;LRRTM2;EPB41L3;PPFIA4;GRIA4
N-glycan Trimming In ER And Calnexin/Calreticulin Cycle R-HSA-532668	5/35	0.0237932	0.266654	3.3545	12.5403	VCP;OS9;PRKCSH;EDEM1;SYVN1
Regulation Of TNFR1 Signaling R-HSA-5357905	5/35	0.0237932	0.266654	3.3545	12.5403	CLIP3;CYLD;CASP8;CFLAR;BIRC3
SUMOylation Of SUMOylation Proteins R-HSA-4085377	5/35	0.0237932	0.266654	3.3545	12.5403	UBE2I;NUP50;NUP62;NUP43;NUP58
Signaling By NOTCH1 R-HSA-1980143	8/74	0.023842	0.266654	2.44277	9.12694	APH1A;TLE3;ADAM17;NCOR1;APH1B;SNW1;PSEN1;RBPJ
Transport Of Mature mRNA Derived From An Intron-Containing Transcript R-HSA-159236	8/74	0.023842	0.266654	2.44277	9.12694	DDX39B;NUP50;NUP62;DHX38;NUP43;NUP58;SRRM1;U2AF1L4
Unfolded Protein Response (UPR) R-HSA-381119	9/89	0.0253316	0.278472	2.26793	8.33625	EDEM1;CREB3L2;CXXC1;SYVN1;CREBRF;SSR1;PDIA6;ADD1;HERPUD1
IRE1alpha Activates Chaperones R-HSA-381070	6/48	0.0253355	0.278472	2.87651	10.5728	EDEM1;CXXC1;SYVN1;SSR1;PDIA6;ADD1
Transcriptional Regulation By RUNX2 R-HSA-8878166	11/119	0.0261611	0.281044	2.05461	7.48593	COL1A1;PSMD13;STAT1;PSMD2;PSME1;ITGBL1;ITGA5;SMAD6;ESR1;RUNX1;GLI2
NR1H3 And NR1H2 Regulate Gene Expression Linked To Cholesterol Transport And Efflux R-HSA-9029569	5/36	0.0265844	0.281044	3.24612	11.7751	KDM3A;NCOR1;AGO1;TNRC6A;TNRC6B
Nuclear Pore Complex (NPC) Disassembly R-HSA-3301854	5/36	0.0265844	0.281044	3.24612	11.7751	NEK9;NUP50;NUP62;NUP43;NUP58
Signaling By FGFR1 In Disease R-HSA-5655302	5/36	0.0265844	0.281044	3.24612	11.7751	STAT1;CNTRL;MYO18A;PIK3R1;FGFR1
MAPK6/MAPK4 Signaling R-HSA-5687128	9/90	0.0270061	0.281044	2.23982	8.08953	PSMD13;PSMD2;NCOA3;AGO1;PSME1;FOXO3;ZNF367;TNRC6A;TNRC6B
RMTs Methylate Histone Arginines R-HSA-3214858	6/49	0.0277511	0.281044	2.80947	10.0705	SMARCE1;SMARCC2;H3C13;H2AC7;ARID1A;SMARCA4
mRNA Splicing - Minor Pathway R-HSA-72165	6/49	0.0277511	0.281044	2.80947	10.0705	PRPF6;DDX23;POLR2D;SNRNP35;SNRNP200;SF3B1
Activation Of HOX Genes During Differentiation R-HSA-5619507	9/91	0.0287571	0.281044	2.21238	7.85147	YY1;H2BC26;NCOR1;MAFB;H3C13;H2AC7;NCOA3;POLR2D;PAX6
HCMV Late Events R-HSA-9610379	9/91	0.0287571	0.281044	2.21238	7.85147	H2BC26;H3C13;H2AC7;NUP50;CHMP1A;NUP62;MVB12B;NUP43;NUP58
Interleukin-7 Signaling R-HSA-1266695	4/25	0.0288682	0.281044	3.83147	13.5826	H3C13;PIK3R1;IL7R;SMARCA4
NOTCH3 Intracellular Domain Regulates Transcription R-HSA-9013508	4/25	0.0288682	0.281044	3.83147	13.5826	SNW1;PLXND1;STAT1;RBPJ
HCMV Infection R-HSA-9609646	11/121	0.029126	0.281044	2.01704	7.1325	H2BC26;NCOR1;H3C13;H2AC7;NUP50;CHMP1A;NUP62;MVB12B;NUP43;NFKB1;NUP58
Post-translational Protein Phosphorylation R-HSA-8957275	10/106	0.02922	0.281044	2.1004	7.4205	TGOLN2;IGFBP5;PRKCSH;MGAT4A;MXRA8;CXXC1;TRIM26;GAS6;APOL1;PDIA6
Biosynthesis Of Maresin-Like SPMs R-HSA-9027307	2/6	0.0297576	0.281044	10.0454	35.3061	CYP2C9;CYP2C8
CLEC7A/inflammasome Pathway R-HSA-5660668	2/6	0.0297576	0.281044	10.0454	35.3061	CASP8;NFKB1
Phenylalanine Metabolism R-HSA-8964208	2/6	0.0297576	0.281044	10.0454	35.3061	IL4I1;PAH
RUNX1 Regulates Estrogen Receptor Mediated Transcription R-HSA-8931987	2/6	0.0297576	0.281044	10.0454	35.3061	ESR1;RUNX1
RUNX1 Regulates Transcription Of Genes Involved In BCR Signaling R-HSA-8939245	2/6	0.0297576	0.281044	10.0454	35.3061	BLK;RUNX1
RUNX1 Regulates Transcription Of Genes Involved In WNT Signaling R-HSA-8939256	2/6	0.0297576	0.281044	10.0454	35.3061	ESR1;RUNX1
Ion Homeostasis R-HSA-5578775	6/50	0.0303139	0.284193	2.74547	9.59859	RYR1;FXYD6-FXYD2;DMPK;FXYD2;ATP1A2;CLIC2
Hedgehog Ligand Biogenesis R-HSA-5358346	7/64	0.0316077	0.292794	2.47346	8.54421	ADAM17;VCP;OS9;PSMD13;PSMD2;PSME1;SYVN1
N-Glycan Antennae Elongation R-HSA-975577	3/15	0.0316907	0.292794	5.02587	17.348	ST6GAL1;MGAT4A;ST3GAL4
Regulation Of IGF Transport And Uptake By IGFBPs R-HSA-381426	11/123	0.0323242	0.295162	1.98081	6.79803	TGOLN2;IGFBP5;PRKCSH;MMP1;MGAT4A;MXRA8;CXXC1;TRIM26;GAS6;APOL1;PDIA6
Calnexin/calreticulin Cycle R-HSA-901042	4/26	0.032873	0.295162	3.65712	12.4895	OS9;PRKCSH;EDEM1;SYVN1
Caspase Activation Via Extrinsic Apoptotic Signaling Pathway R-HSA-5357769	4/26	0.032873	0.295162	3.65712	12.4895	CASP8;DCC;TMED7-TICAM2;CFLAR
N-glycan Antennae Elongation In medial/trans-Golgi R-HSA-975576	4/26	0.032873	0.295162	3.65712	12.4895	ST6GAL1;FUCA1;MGAT4A;ST3GAL4
Formation Of TC-NER Pre-Incision Complex R-HSA-6781823	6/52	0.035892	0.317794	2.62583	8.73677	DDB1;AQR;ERCC3;UVSSA;POLR2D;COPS7A
Transcriptional Activation Of Mitochondrial Biogenesis R-HSA-2151201	6/52	0.035892	0.317794	2.62583	8.73677	MBD4;NCOR1;CHD9;NR1D1;MEF2D;HCFC1
Postmitotic Nuclear Pore Complex (NPC) Reformation R-HSA-9615933	4/27	0.0371857	0.324441	3.49793	11.5146	UBE2I;NUP62;NUP43;NUP58
Caspase Activation Via Death Receptors In Presence Of Ligand R-HSA-140534	3/16	0.0376606	0.324441	4.63902	15.212	CASP8;TMED7-TICAM2;CFLAR
NRIF Signals Cell Death From Nucleus R-HSA-205043	3/16	0.0376606	0.324441	4.63902	15.212	APH1A;APH1B;PSEN1
Synthesis Of PIPs At Early Endosome Membrane R-HSA-1660516	3/16	0.0376606	0.324441	4.63902	15.212	FIG4;MTMR2;MTM1
Post-translational Protein Modification R-HSA-597592	80/1383	0.0380029	0.325193	1.25242	4.09554	GALNT11;PRKCSH;UBE2Z;YY1;ATXN3L;H2BC26;SIN3A;PSMD2;PPP6R3;NUP62;ADAMTSL2;FBXO4;TRIM26;TECTA;NSF;RAB2B;USP47;ST6GAL1;SHPRH;TRAPPC2L;IGFBP5;PARP1;H2AC7;ANK2;ANK1;PDIA6;HIC1;DDB2;PIAS1;HCFC1;TGFBR2;DDB1;RAB30;NUP50;PSME1;MXRA8;PGR;GAS6;NUP58;BIRC3;RAB7A;VCP;SP100;INO80D;PSMD13;NTM;USP11;CTR9;CXXC1;ASB13;COPS7A;RTF1;TGOLN2;OS9;ATXN7;ST3GAL4;NUP43;APOL1;TFAP2A;UBE2I;NEGR1;USP20;USP9X;ST8SIA1;EDEM1;FUC…
HCMV Early Events R-HSA-9609690	9/96	0.0387112	0.328563	2.08469	6.77862	H2BC26;NCOR1;H3C13;H2AC7;NUP50;NUP62;NUP43;NUP58;NFKB1
Nuclear Envelope Breakdown R-HSA-2980766	6/53	0.0389121	0.328563	2.56983	8.34281	NEK9;NUP50;NUP62;NUP43;LPIN2;NUP58
RNA Polymerase II Transcription Termination R-HSA-73856	7/67	0.0392293	0.329062	2.34942	7.60819	NUDT21;CPSF7;DDX39B;CPSF1;DHX38;SRRM1;U2AF1L4
Neurofascin Interactions R-HSA-447043	2/7	0.0403656	0.334196	8.03586	25.7933	DCX;ANK1
NrCAM Interactions R-HSA-447038	2/7	0.0403656	0.334196	8.03586	25.7933	NRP2;ANK1
Notch-HLH Transcription Pathway R-HSA-350054	4/28	0.0418076	0.343902	3.35201	10.6415	NOTCH2;NCOR1;SNW1;RBPJ
Reproduction R-HSA-1474165	10/113	0.0425712	0.347937	1.95693	6.1772	UBE2I;H2BC26;STAG3;H3C13;H2AC7;HVCN1;POT1;ATM;ZP2;SYNE1
RUNX1 Regulates Transcription Of Genes Involved In Differentiation Of HSCs R-HSA-8939236	9/98	0.0432773	0.349715	2.03762	6.3984	H2BC26;KMT2A;H3C13;H2AC7;PSMD13;PSMD2;TCF12;PSME1;RUNX1
Dual Incision In GG-NER R-HSA-5696400	5/41	0.0436072	0.349715	2.79453	8.75396	DDB1;PARP1;ERCC3;ERCC5;DDB2
Synthesis Of PIPs At Golgi Membrane R-HSA-1660514	3/17	0.04416	0.349715	4.30744	13.4389	TPTE2;FIG4;INPP5E
Trafficking Of GluR2-containing AMPA Receptors R-HSA-416993	3/17	0.04416	0.349715	4.30744	13.4389	NSF;AP2M1;GRIA4
Zinc Transporters R-HSA-435354	3/17	0.04416	0.349715	4.30744	13.4389	SLC39A14;SLC39A1;SLC39A3
RAC1 GTPase Cycle R-HSA-9013149	14/178	0.0446943	0.351761	1.72246	5.35324	PRKCSH;PIK3R1;SLC1A5;ARHGAP15;ARHGAP26;ARHGAP45;ARHGAP4;DOCK10;TIAM1;OPHN1;ABI1;CDC42EP1;WASF2;RAB7A
Hh Mutants Are Degraded By ERAD R-HSA-5362768	6/55	0.0454245	0.354583	2.46467	7.62005	VCP;OS9;PSMD13;PSMD2;PSME1;SYVN1
L1CAM Interactions R-HSA-373760	9/99	0.0456903	0.354583	2.01488	6.21765	NRP1;NRP2;KCNQ2;DCX;ANK2;ITGA5;ANK1;AP2M1;FGFR1
Transcriptional Regulation Of White Adipocyte Differentiation R-HSA-381340	8/84	0.0458872	0.354583	2.12024	6.53366	MBD4;MED24;NCOR1;CHD9;NCOA3;FAM120B;MED6;NFKB1
SUMOylation Of Intracellular Receptors R-HSA-4090294	4/29	0.0467391	0.35684	3.21776	9.85656	UBE2I;PGR;ESR1;PIAS1
TNFs Bind Their Physiological Receptors R-HSA-5669034	4/29	0.0467391	0.35684	3.21776	9.85656	EDARADD;TNFRSF17;TNFSF11;TNFRSF14
Transport Of Mature mRNA Derived From An Intronless Transcript R-HSA-159231	5/42	0.0476426	0.361574	2.71886	8.27629	CPSF1;NUP50;NUP62;NUP43;NUP58
MAPK Family Signaling Cascades R-HSA-5683057	22/318	0.0504869	0.375691	1.50202	4.48511	PSMD13;NCOA3;RASGRF1;PIK3R1;FOXO3;GFRA2;SPRED2;SPRED1;DUSP10;RASGEF1A;NRG3;PPP2R1A;PSMD2;AGO1;PSME1;NF1;PRKCQ;PTPN7;ZNF367;TNRC6A;FGFR1;TNRC6B
SUMOylation Of Transcription Cofactors R-HSA-3899300	5/43	0.0518917	0.375691	2.64717	7.83192	UBE2I;SIN3A;MBD1;PHC3;PIAS1
Transport Of Mature mRNAs Derived From Intronless Transcripts R-HSA-159234	5/43	0.0518917	0.375691	2.64717	7.83192	CPSF1;NUP50;NUP62;NUP43;NUP58
Translation Of Structural Proteins R-HSA-9683701	4/30	0.051979	0.375691	3.09384	9.14821	ST6GAL1;UBE2I;PRKCSH;ST3GAL4
Biosynthesis Of Maresins R-HSA-9018682	2/8	0.0521548	0.375691	6.6962	19.7775	CYP2C9;CYP2C8
CREB3 Factors Activate Genes R-HSA-8874211	2/8	0.0521548	0.375691	6.6962	19.7775	CREB3L2;CREBRF
Formation Of Editosome R-HSA-75094	2/8	0.0521548	0.375691	6.6962	19.7775	APOBEC3C;A1CF
RUNX2 Regulates Genes Involved In Cell Migration R-HSA-8941332	2/8	0.0521548	0.375691	6.6962	19.7775	ITGBL1;ITGA5
Synthesis Of Epoxy (EET) And Dihydroxyeicosatrienoic Acids (DHET) R-HSA-2142670	2/8	0.0521548	0.375691	6.6962	19.7775	CYP2C9;CYP2C8
Regulation Of Lipid Metabolism By PPARalpha R-HSA-400206	10/118	0.0543254	0.389129	1.86584	5.43475	MBD4;MED24;NCOR1;CHD9;SIN3A;NCOA3;FAM120B;TXNRD1;NR1D1;MED6
Hh Mutants Abrogate Ligand Secretion R-HSA-5387390	6/58	0.0563942	0.401691	2.32212	6.67698	VCP;OS9;PSMD13;PSMD2;PSME1;SYVN1
Activated NOTCH1 Transmits Signal To Nucleus R-HSA-2122948	4/31	0.0575253	0.402986	2.97909	8.50689	APH1A;ADAM17;APH1B;PSEN1
Glutamate Binding, Activation Of AMPA Receptors And Synaptic Plasticity R-HSA-399721	4/31	0.0575253	0.402986	2.97909	8.50689	NSF;EPB41L1;AP2M1;GRIA4
Meiosis R-HSA-1500620	8/88	0.057544	0.402986	2.0138	5.74981	H2BC26;UBE2I;H3C13;STAG3;H2AC7;POT1;ATM;SYNE1
RHOC GTPase Cycle R-HSA-9013106	7/73	0.0578404	0.402986	2.13516	6.08535	AKAP13;FMNL2;OPHN1;DAAM1;ARHGEF1;PIK3R1;ARHGAP26
Intracellular Signaling By Second Messengers R-HSA-9006925	21/306	0.0589001	0.408139	1.48836	4.2149	PSMD13;PRKX;PIK3R1;ADCY1;FOXO3;PHC3;ESR1;GATAD2B;CAMKK2;NRG3;VAPA;PPP2R1A;PSMD2;AGO1;PSME1;PIP4K2A;PIP4K2B;ICOS;TNRC6A;FGFR1;TNRC6B
Arachidonic Acid Metabolism R-HSA-2142753	6/59	0.0603748	0.411646	2.27818	6.39527	GGT5;CYP2C9;CYP2C8;CYP2U1;ALOX15B;PTGS1
RHOQ GTPase Cycle R-HSA-9013406	6/59	0.0603748	0.411646	2.27818	6.39527	OPHN1;FNBP1;CDC42EP1;SLC1A5;ARHGAP26;RAB7A
Transcriptional Regulation Of Granulopoiesis R-HSA-9616222	6/59	0.0603748	0.411646	2.27818	6.39527	H2BC26;KMT2A;H3C13;H2AC7;FLI1;RUNX1
Heme Signaling R-HSA-9707616	5/45	0.0610314	0.41172	2.51455	7.0316	MBD4;NCOR1;CHD9;NR1D1;MEF2D
SUMOylation Of DNA Replication Proteins R-HSA-4615885	5/45	0.0610314	0.41172	2.51455	7.0316	UBE2I;NUP50;NUP62;NUP43;NUP58
RNA Polymerase II Transcribes snRNA Genes R-HSA-6807505	7/74	0.0613924	0.411976	2.10318	5.86886	INTS14;POU2F1;POLR2D;INTS4;TAF6;RPRD2;INTS6
Vesicle-mediated Transport R-HSA-5653656	39/637	0.0633281	0.412789	1.32096	3.64508	DENND1B;STX16;COPS7A;UBE2Z;JCHAIN;GGA2;TGOLN2;HPX;GGA1;KIF5C;PPP6R3;FCHO2;MVB12B;APOL1;EPS15;AP2M1;TPD52;NSF;TRAPPC2L;AMBP;FNBP1;EXOC7;ANK2;ANK1;EPN2;COL1A1;SNX18;RAB30;NECAP2;AKR1B10;RABEP1;TBC1D4;DNAJC6;EXOC4;MASP1;IL7R;RIN2;COPE;RAB7A
Defective TPR May Confer Susceptibility Towards Thyroid Papillary Carcinoma (TPC) R-HSA-5619107	4/32	0.0633749	0.412789	2.87255	7.92446	NUP50;NUP62;NUP43;NUP58
Innate Immune System R-HSA-168249	60/1035	0.0635076	0.412789	1.24978	3.44515	PIGR;PRKCSH;PTPRJ;CASP8;GM2A;CASP10;PPP2R1A;PSMD2;ANPEP;CTSH;ACP3;CCR6;NANOS2;MANBA;DBNL;RNASET2;AMPD3;RHOF;ARHGAP45;DOK3;PKM;AIM2;IRF3;DNAJC5;PSME1;ELMO1;TXNIP;TLR10;PRKCQ;TLR7;CD47;MASP1;MS4A2;TLR5;CD44;BIRC3;RAB7A;VCP;UBA7;PSMD13;HVCN1;PRCP;PIK3R1;PSEN1;CEACAM21;WASF2;CCL22;FUCA1;TMED7-TICAM2;LIMK1;HUWE1;NFKB1;MAPK13;BST2;CYLD;VAPA;ABI1;CTNNB1;MAN2B1;LGMN
Formation Of beta-catenin:TCF Transactivating Complex R-HSA-201722	6/60	0.0645181	0.412789	2.23588	6.12811	TLE3;H2BC26;H3C13;H2AC7;CTNNB1;SMARCA4
Meiotic Synapsis R-HSA-1221632	6/60	0.0645181	0.412789	2.23588	6.12811	H2BC26;UBE2I;STAG3;H2AC7;POT1;SYNE1
Transcriptional Regulation By MECP2 R-HSA-8986944	6/60	0.0645181	0.412789	2.23588	6.12811	NCOR1;MOBP;SIN3A;AGO1;TNRC6A;TNRC6B
CHL1 Interactions R-HSA-447041	2/9	0.0649892	0.412789	5.7393	15.6886	NRP1;ANK1
Maturation Of Protein 3A R-HSA-9683673	2/9	0.0649892	0.412789	5.7393	15.6886	ST6GAL1;ST3GAL4
PI5P Regulates TP53 Acetylation R-HSA-6811555	2/9	0.0649892	0.412789	5.7393	15.6886	PIP4K2A;PIP4K2B
TRIF-mediated Programmed Cell Death R-HSA-2562578	2/9	0.0649892	0.412789	5.7393	15.6886	CASP8;TMED7-TICAM2
ISG15 Antiviral Mechanism R-HSA-1169408	7/75	0.065075	0.412789	2.07214	5.66154	IRF3;UBA7;STAT1;NUP50;NUP62;NUP43;NUP58
NR1H2 And NR1H3-mediated Signaling R-HSA-9024446	5/46	0.0659214	0.412848	2.45309	6.67067	KDM3A;NCOR1;AGO1;TNRC6A;TNRC6B
NOTCH4 Intracellular Domain Regulates Transcription R-HSA-9013695	3/20	0.0667033	0.412848	3.54674	9.60281	NOTCH2;SNW1;RBPJ
Processing Of Intronless Pre-mRNAs R-HSA-77595	3/20	0.0667033	0.412848	3.54674	9.60281	NUDT21;CPSF7;CPSF1
Receptor-type Tyrosine-Protein Phosphatases R-HSA-388844	3/20	0.0667033	0.412848	3.54674	9.60281	PTPRD;PTPRS;PPFIA4
Signal Transduction By L1 R-HSA-445144	3/20	0.0667033	0.412848	3.54674	9.60281	NRP1;ITGA5;FGFR1
Signaling By TGF-beta Receptor Complex R-HSA-170834	8/91	0.0674135	0.415228	1.94071	5.23391	NCOR1;SNW1;PARP1;STAT1;USP9X;TRIM33;TGFBR2;SMAD7
Signaling By WNT R-HSA-195721	20/294	0.0687047	0.419859	1.47367	3.94639	TLE3;WNT5B;H2AC7;PSMD13;NCOA3;WNT7B;KLHL12;SMARCA4;SFRP1;H2BC26;DAAM1;H3C13;PPP2R1A;PSMD2;AGO1;PSME1;CTNNB1;AP2M1;TNRC6A;TNRC6B
Signaling By FGFR In Disease R-HSA-1226099	6/61	0.068824	0.419859	2.19511	5.87455	STAT1;CNTRL;POLR2D;MYO18A;PIK3R1;FGFR1
NOD1/2 Signaling Pathway R-HSA-168638	4/33	0.0695239	0.42211	2.77335	7.39398	CYLD;CASP8;MAPK13;BIRC3
Viral Messenger RNA Synthesis R-HSA-168325	5/47	0.0710235	0.42917	2.39456	6.33299	NUP50;NUP62;POLR2D;NUP43;NUP58
Transcription-Coupled Nucleotide Excision Repair (TC-NER) R-HSA-6781827	7/77	0.0728326	0.436299	2.01273	5.27252	DDB1;AQR;ERCC3;UVSSA;POLR2D;COPS7A;ERCC5
Oxidative Stress Induced Senescence R-HSA-2559580	8/93	0.0745375	0.436299	1.89484	4.91987	H2BC26;H3C13;H2AC7;AGO1;TNIK;PHC3;TNRC6A;TNRC6B
ER Quality Control Compartment (ERQC) R-HSA-901032	3/21	0.0751776	0.436299	3.34952	8.66824	OS9;EDEM1;SYVN1
Inflammasomes R-HSA-622312	3/21	0.0751776	0.436299	3.34952	8.66824	AIM2;TXNIP;NFKB1
Synaptic Adhesion-Like Molecules R-HSA-8849932	3/21	0.0751776	0.436299	3.34952	8.66824	PTPRD;PTPRS;GRIA4
Synthesis, Secretion, And Inactivation Of Glucagon-like Peptide-1 (GLP-1) R-HSA-381771	3/21	0.0751776	0.436299	3.34952	8.66824	CTNNB1;PAX6;FFAR1
VxPx Cargo-Targeting To Cilium R-HSA-5620916	3/21	0.0751776	0.436299	3.34952	8.66824	EXOC7;EXOC4;ASAP1
Cellular Responses To Stress R-HSA-2262752	43/722	0.0752663	0.436299	1.2827	3.31798	VCP;PSMD13;CHD9;CXXC1;ADD1;HERPUD1;H2BC26;H3C13;SIN3A;PSMD2;SESN1;CREB3L2;NUP62;SSR1;NUP43;HIF1AN;MEF2D;MBD4;H2AC7;EDEM1;EIF2AK1;TXNRD1;SYVN1;NR1D1;PHC3;PDIA6;SOD3;NFKB1;H1-5;NCOR1;AGO1;NUP50;PSME1;CREBRF;COL4A6;TXNIP;POT1;PGR;ATM;TNIK;TNRC6A;NUP58;TNRC6B
Beta-catenin Independent WNT Signaling R-HSA-3858494	11/142	0.0756905	0.436299	1.69182	4.36676	WNT5B;DAAM1;PSMD13;PSMD2;AGO1;NCOA3;PSME1;CTNNB1;AP2M1;TNRC6A;TNRC6B
Clathrin-mediated Endocytosis R-HSA-8856828	11/142	0.0756905	0.436299	1.69182	4.36676	TGOLN2;NECAP2;SNX18;FNBP1;DNAJC6;FCHO2;COPS7A;IL7R;EPS15;AP2M1;EPN2
Nuclear Import Of Rev Protein R-HSA-180746	4/34	0.0759674	0.436299	2.68076	6.90953	NUP50;NUP62;NUP43;NUP58
Inhibition Of DNA Recombination At Telomere R-HSA-9670095	5/48	0.0763361	0.436451	2.33875	6.01668	H2BC26;H2AC7;POLR2D;ATRX;POT1
Activation Of AMPK Downstream Of NMDARs R-HSA-9619483	2/10	0.0787432	0.436511	5.02162	12.7628	MAPT;CAMKK2
Negative Regulation Of Activity Of TFAP2 (AP-2) Family Transcription Factors R-HSA-8866904	2/10	0.0787432	0.436511	5.02162	12.7628	TFAP2A;UBE2I
Organic Cation Transport R-HSA-549127	2/10	0.0787432	0.436511	5.02162	12.7628	SLC22A18;RUNX1
PI3K Events In ERBB4 Signaling R-HSA-1250342	2/10	0.0787432	0.436511	5.02162	12.7628	NRG3;PIK3R1
RUNX1 And FOXP3 Control Development Of Regulatory T Lymphocytes (Tregs) R-HSA-8877330	2/10	0.0787432	0.436511	5.02162	12.7628	CTLA4;RUNX1
RUNX3 Regulates p14-ARF R-HSA-8951936	2/10	0.0787432	0.436511	5.02162	12.7628	BRD2;RUNX1
Regulation Of FOXO Transcriptional Activity By Acetylation R-HSA-9617629	2/10	0.0787432	0.436511	5.02162	12.7628	TXNIP;FOXO3
Transcriptional Regulation By TP53 R-HSA-3700989	23/354	0.080482	0.439341	1.40315	3.53554	GLS2;TXNRD1;NDRG1;GATAD2B;DDB2;RRM2B;ERCC3;PPP2R1A;CASP10;AGO1;SESN1;CNOT2;POLR2D;TP53BP2;SMYD2;PIP4K2A;RAD17;PIP4K2B;ATM;TAF6;TOPBP1;TNRC6A;TNRC6B
EPH-ephrin Mediated Repulsion Of Cells R-HSA-3928665	5/49	0.0818571	0.439341	2.28547	5.72004	APH1A;TIAM1;APH1B;PSEN1;AP2M1
Signaling By FGFR1 R-HSA-5654736	5/49	0.0818571	0.439341	2.28547	5.72004	SPRED2;SPRED1;PPP2R1A;PIK3R1;FGFR1
P75 NTR Receptor-Mediated Signaling R-HSA-193704	8/95	0.0820986	0.439341	1.85109	4.62741	APH1A;AKAP13;TIAM1;ADAM17;APH1B;ARHGEF1;PSEN1;NFKB1
NEP/NS2 Interacts With Cellular Export Machinery R-HSA-168333	4/35	0.0826995	0.439341	2.59415	6.46602	NUP50;NUP62;NUP43;NUP58
RHOBTB GTPase Cycle R-HSA-9706574	4/35	0.0826995	0.439341	2.59415	6.46602	CPSF7;DDX39B;RBBP6;SRRM1
Rev-mediated Nuclear Export Of HIV RNA R-HSA-165054	4/35	0.0826995	0.439341	2.59415	6.46602	NUP50;NUP62;NUP43;NUP58
Transport Of Ribonucleoproteins Into Host Nucleus R-HSA-168271	4/35	0.0826995	0.439341	2.59415	6.46602	NUP50;NUP62;NUP43;NUP58
Transport Of SLBP Independent Mature mRNA R-HSA-159227	4/35	0.0826995	0.439341	2.59415	6.46602	NUP50;NUP62;NUP43;NUP58
Vpr-mediated Nuclear Import Of PICs R-HSA-180910	4/35	0.0826995	0.439341	2.59415	6.46602	NUP50;NUP62;NUP43;NUP58
Recruitment Of NuMA To Mitotic Centrosomes R-HSA-380320	7/80	0.0854493	0.452066	1.92971	4.74675	CEP57;NUMA1;PPP2R1A;NDE1;CNTRL;TUBGCP6;CKAP5
Cargo Trafficking To Periciliary Membrane R-HSA-5620920	5/50	0.0875841	0.458085	2.23457	5.44152	EXOC7;INPP5E;EXOC4;BBS9;ASAP1
Dual Incision In TC-NER R-HSA-6782135	6/65	0.0876648	0.458085	2.04586	4.98009	DDB1;AQR;ERCC3;UVSSA;POLR2D;ERCC5
Regulation Of RAS By GAPs R-HSA-5658442	6/65	0.0876648	0.458085	2.04586	4.98009	SPRED2;SPRED1;PSMD13;PSMD2;PSME1;NF1
PIP3 Activates AKT Signaling R-HSA-1257604	18/268	0.0886437	0.458261	1.45236	3.51926	PSMD13;PIK3R1;FOXO3;PHC3;ESR1;GATAD2B;NRG3;VAPA;PPP2R1A;PSMD2;AGO1;PSME1;PIP4K2A;PIP4K2B;ICOS;TNRC6A;FGFR1;TNRC6B
Activated PKN1 Stimulates Transcription Of Androgen Receptor Regulated KLK2 And KLK3 R-HSA-5625886	4/36	0.0897139	0.458261	2.51295	6.05905	H2BC26;KDM4C;H3C13;H2AC7
Export Of Viral Ribonucleoproteins From Nucleus R-HSA-168274	4/36	0.0897139	0.458261	2.51295	6.05905	NUP50;NUP62;NUP43;NUP58
Transcriptional Regulation By AP-2 (TFAP2) Family Of Transcription Factors R-HSA-8864260	4/36	0.0897139	0.458261	2.51295	6.05905	YY1;TFAP2A;UBE2I;ESR1
Transport Of SLBP Dependant Mature mRNA R-HSA-159230	4/36	0.0897139	0.458261	2.51295	6.05905	NUP50;NUP62;NUP43;NUP58
TP53 Regulates Metabolic Genes R-HSA-5628897	7/81	0.0899149	0.458261	1.90353	4.58539	RRM2B;GLS2;SESN1;TXNRD1;AGO1;TNRC6A;TNRC6B
Metabolism Of Proteins R-HSA-392499	102/1890	0.0929769	0.458261	1.16126	2.75845	GALNT11;UBE2Z;YY1;ATXN3L;KIF5C;PSMD2;ANPEP;FBXO4;TRIM26;TECTA;NSF;RAB2B;ST6GAL1;TRAPPC2L;IGFBP5;H2AC7;ANK2;ANK1;PDIA6;HIC1;PIAS1;HCFC1;RAB30;PSME1;MXRA8;PGR;VCP;INO80D;PSMD13;NTM;CTR9;COPS7A;RTF1;APH1A;TGOLN2;APH1B;ATXN7;ST3GAL4;SSR1;TFAP2A;UBE2I;ST8SIA1;EDEM1;FUCA1;PMM2;TBCD;PHC3;ESR1;PUM2;SMAD7;CYLD;TBCE;COPE;PRKCSH;SEC61A1;H2BC26;SIN3A;PPP6R3;NUP62;ADAMTSL2;CTSH;FFAR1;USP47;SHPRH;PARP1;MMP1;EX…
CASP8 Activity Is Inhibited R-HSA-5218900	2/11	0.0933007	0.458261	4.46343	10.5869	CASP8;CFLAR
DSCAM Interactions R-HSA-376172	2/11	0.0933007	0.458261	4.46343	10.5869	DCC;MAPK13
Dimerization Of Procaspase-8 R-HSA-69416	2/11	0.0933007	0.458261	4.46343	10.5869	CASP8;CFLAR
Erythrocytes Take Up Carbon Dioxide And Release Oxygen R-HSA-1237044	2/11	0.0933007	0.458261	4.46343	10.5869	MINDY4;CYB5RL
Pexophagy R-HSA-9664873	2/11	0.0933007	0.458261	4.46343	10.5869	NBR1;ATM
Phenylalanine And Tyrosine Metabolism R-HSA-8963691	2/11	0.0933007	0.458261	4.46343	10.5869	IL4I1;PAH
Signaling By PDGFRA Extracellular Domain Mutants R-HSA-9673770	2/11	0.0933007	0.458261	4.46343	10.5869	STAT1;PIK3R1
Glutamate Neurotransmitter Release Cycle R-HSA-210500	3/23	0.0934493	0.458261	3.01426	7.1448	GLS2;SLC1A2;PPFIA4
RHOBTB1 GTPase Cycle R-HSA-9013422	3/23	0.0934493	0.458261	3.01426	7.1448	CPSF7;RBBP6;SRRM1
Cellular Responses To Stimuli R-HSA-8953897	43/736	0.0942546	0.459601	1.25583	2.96595	VCP;PSMD13;CHD9;CXXC1;ADD1;HERPUD1;H2BC26;H3C13;SIN3A;PSMD2;SESN1;CREB3L2;NUP62;SSR1;NUP43;HIF1AN;MEF2D;MBD4;H2AC7;EDEM1;EIF2AK1;TXNRD1;SYVN1;NR1D1;PHC3;PDIA6;SOD3;NFKB1;H1-5;NCOR1;AGO1;NUP50;PSME1;CREBRF;COL4A6;TXNIP;POT1;PGR;ATM;TNIK;TNRC6A;NUP58;TNRC6B
Cellular Senescence R-HSA-2559583	12/165	0.0944434	0.459601	1.58008	3.72861	H1-5;H2BC26;H3C13;H2AC7;AGO1;POT1;ATM;TNIK;PHC3;NFKB1;TNRC6A;TNRC6B
HDR Thru Single Strand Annealing (SSA) R-HSA-5685938	4/37	0.0970034	0.468482	2.43667	5.68478	RAD52;RAD17;ATM;TOPBP1
Interactions Of Rev With Host Cellular Proteins R-HSA-177243	4/37	0.0970034	0.468482	2.43667	5.68478	NUP50;NUP62;NUP43;NUP58
Sensory Processing Of Sound By Inner Hair Cells Of Cochlea R-HSA-9662360	6/67	0.0980413	0.471708	1.97857	4.59497	EPS8;TMC1;EPB41L1;DNAJC5;EPB41L3;CIB2
Ub-specific Processing Proteases R-HSA-5689880	14/201	0.0984465	0.471877	1.50876	3.49768	USP47;USP20;USP9X;H2AC7;PSMD13;USP11;DDB2;SMAD7;CYLD;H2BC26;ATXN7;PSMD2;PSME1;BIRC3
Antiviral Mechanism By IFN-stimulated Genes R-HSA-1169410	7/83	0.099232	0.472292	1.85324	4.28153	IRF3;UBA7;STAT1;NUP50;NUP62;NUP43;NUP58
SARS-CoV-1 Infection R-HSA-9678108	5/52	0.0996443	0.472292	2.13925	4.93344	ST6GAL1;VCP;UBE2I;PRKCSH;ST3GAL4
Signaling By PDGF R-HSA-186797	5/52	0.0996443	0.472292	2.13925	4.93344	STAT1;COL6A1;CXXC1;PIK3R1;CRKL
PPARA Activates Gene Expression R-HSA-1989781	9/116	0.100683	0.47545	1.69324	3.88729	MBD4;MED24;NCOR1;CHD9;NCOA3;FAM120B;TXNRD1;NR1D1;MED6
Incretin Synthesis, Secretion, And Inactivation R-HSA-400508	3/24	0.103204	0.476109	2.87057	6.51921	CTNNB1;PAX6;FFAR1
Interleukin-6 Family Signaling R-HSA-6783589	3/24	0.103204	0.476109	2.87057	6.51921	CTF1;IL11RA;STAT1
Other Interleukin Signaling R-HSA-449836	3/24	0.103204	0.476109	2.87057	6.51921	CSF1R;IL34;IL16
Xenobiotics R-HSA-211981	3/24	0.103204	0.476109	2.87057	6.51921	CYP2C9;CYP2C8;CYP2B6
Costimulation By CD28 Family R-HSA-388841	6/68	0.103463	0.476109	1.94656	4.41584	PPP2R1A;BTLA;CTLA4;TNFRSF14;PIK3R1;ICOS
Interactions Of Vpr With Host Cellular Proteins R-HSA-176033	4/38	0.10456	0.476109	2.36488	5.33988	NUP50;NUP62;NUP43;NUP58
Cell Surface Interactions At Vascular Wall R-HSA-202733	10/134	0.105373	0.476109	1.62371	3.65376	FCAMR;MMP1;CEACAM21;PIK3R1;CD47;ITGA5;GAS6;GLG1;CD44;JCHAIN
Ion Transport By P-type ATPases R-HSA-936837	5/53	0.105971	0.476109	2.09458	4.70147	FXYD6-FXYD2;FXYD2;ATP10D;ATP13A5;ATP1A2
Sensory Processing Of Sound By Outer Hair Cells Of Cochlea R-HSA-9662361	5/53	0.105971	0.476109	2.09458	4.70147	EPS8;TMC1;EPB41L1;EPB41L3;CIB2
Organelle Biogenesis And Maintenance R-HSA-1852241	18/275	0.106102	0.476109	1.41228	3.16823	CEP57;MBD4;C2CD3;EXOC7;SEPTIN2;CHD9;NDE1;ASAP1;NR1D1;CKAP5;HCFC1;NCOR1;PPP2R1A;INPP5E;CNTRL;EXOC4;BBS9;MEF2D
Transport Of Small Molecules R-HSA-382551	41/706	0.107027	0.476109	1.24699	2.7866	RYR1;VCP;TTYH3;MINDY4;PSMD13;ATP10D;SLC1A2;SLC1A4;ATP1A2;ADCY1;AQP5;SLC1A5;AQP2;NALCN;ADD1;OS9;PSMD2;SLC22A18;SLC15A3;CLIC2;SLC39A1;AP2M1;SLC39A3;SLC38A4;FXYD6-FXYD2;ABCC4;ABCA6;TSC22D3;SLC33A1;ABCA8;SLC39A14;TPCN1;RUNX1;NCEH1;WNK1;FXYD2;SLC9A9;PSME1;SLC27A6;ATP13A5;CYB5RL
Butyrophilin (BTN) Family Interactions R-HSA-8851680	2/12	0.108555	0.476109	4.01688	8.91949	BTN2A2;BTN2A1
CREB1 Phosphorylation Thru Activation Of Adenylate Cyclase R-HSA-442720	2/12	0.108555	0.476109	4.01688	8.91949	PRKX;ADCY1
Disorders Of Developmental Biology R-HSA-9675151	2/12	0.108555	0.476109	4.01688	8.91949	NCOR1;SIN3A
HDR Thru MMEJ (alt-NHEJ) R-HSA-5685939	2/12	0.108555	0.476109	4.01688	8.91949	RAD52;PARP1
Josephin Domain DUBs R-HSA-5689877	2/12	0.108555	0.476109	4.01688	8.91949	ATXN3L;VCP
P2Y Receptors R-HSA-417957	2/12	0.108555	0.476109	4.01688	8.91949	P2RY14;P2RY1
TP53 Regulates Transcription Of Caspase Activators And Caspases R-HSA-6803207	2/12	0.108555	0.476109	4.01688	8.91949	CASP10;ATM
Neuronal System R-HSA-112316	24/386	0.108855	0.476109	1.338	2.96733	NSF;PTPRS;DBNL;GLS2;RASGRF1;SLC1A2;PRKX;ADCY1;CAMKK2;PTPRD;GABRR3;PANX2;KCNV1;KCNS1;EPB41L1;EPB41L2;DNAJC5;EPB41L3;KCNQ2;LRRTM2;MAPT;PPFIA4;AP2M1;GRIA4
Circadian Clock R-HSA-400253	6/69	0.109038	0.476109	1.91556	4.24498	MBD4;NCOR1;CHD9;BHLHE41;NR1D1;MEF2D
Glycolysis R-HSA-70171	6/69	0.109038	0.476109	1.91556	4.24498	PKM;PPP2R1A;NUP50;NUP62;NUP43;NUP58
RHOB GTPase Cycle R-HSA-9013026	6/69	0.109038	0.476109	1.91556	4.24498	AKAP13;OPHN1;DAAM1;ARHGEF1;PIK3R1;ARHGAP26
ABC-family Proteins Mediated Transport R-HSA-382556	8/102	0.111978	0.482421	1.71261	3.74968	ABCC4;VCP;OS9;PSMD13;ABCA6;PSMD2;PSME1;ABCA8
Signaling By VEGF R-HSA-194138	8/102	0.111978	0.482421	1.71261	3.74968	NRP1;NRP2;ABI1;ELMO1;CTNNB1;PIK3R1;WASF2;MAPK13
SARS-CoV Infections R-HSA-9679506	23/369	0.112338	0.482421	1.34124	2.93228	NRP1;FXYD6-FXYD2;ST6GAL1;VCP;UBE2I;STAT1;PRKCSH;ATP1A2;ATG14;GATAD2B;IRF3;FXYD2;NUP50;MGAT4A;NUP62;ST3GAL4;TLR7;NUP43;MASP1;VPS39;AP2M1;NUP58;BRD4
Elastic Fibre Formation R-HSA-1566948	4/39	0.112376	0.482421	2.29719	5.02145	MFAP4;LOXL3;ITGA5;FBLN5
Synthesis Of PA R-HSA-1483166	4/39	0.112376	0.482421	2.29719	5.02145	MIGA1;PRKCSH;LIPH;PLA2R1
Signaling By TGFB Family Members R-HSA-9006936	9/119	0.113175	0.483307	1.6468	3.58808	SNW1;NCOR1;PARP1;STAT1;USP9X;SMAD6;TRIM33;SMAD7;TGFBR2
NOTCH3 Activation And Transmission Of Signal To Nucleus R-HSA-9013507	3/25	0.11334	0.483307	2.73994	5.96585	APH1A;APH1B;PSEN1
Cargo Recognition For Clathrin-Mediated Endocytosis R-HSA-8856825	8/104	0.121471	0.509685	1.67675	3.53473	TGOLN2;NECAP2;FCHO2;COPS7A;IL7R;EPS15;AP2M1;EPN2
Phase I - Functionalization Of Compounds R-HSA-211945	8/104	0.121471	0.509685	1.67675	3.53473	CYP2C9;CYP2C8;CYP2B6;CYP2U1;CYP11B1;ACSS1;CES2;PTGS1
SARS-CoV-2 Activates/Modulates Innate And Adaptive Immune Responses R-HSA-9705671	9/121	0.121957	0.509685	1.61722	3.40277	IRF3;STAT1;NUP50;NUP62;TLR7;NUP43;MASP1;ATG14;NUP58
Metal Ion SLC Transporters R-HSA-425410	3/26	0.123836	0.509685	2.62068	5.47407	SLC39A1;SLC39A14;SLC39A3
FGFRL1 Modulation Of FGFR1 Signaling R-HSA-5658623	2/13	0.124406	0.509685	3.65152	7.61051	SPRED2;SPRED1
Inhibition Of Replication Initiation Of Damaged DNA By RB1/E2F1 R-HSA-113501	2/13	0.124406	0.509685	3.65152	7.61051	PPP2R1A;PPP2R3B
NF-kB Activation Thru FADD/RIP-1 Pathway Mediated By Caspase-8 And -10 R-HSA-933543	2/13	0.124406	0.509685	3.65152	7.61051	CASP8;CASP10
Purine Salvage R-HSA-74217	2/13	0.124406	0.509685	3.65152	7.61051	AMPD1;AMPD3
Suppression Of Phagosomal Maturation R-HSA-9637687	2/13	0.124406	0.509685	3.65152	7.61051	NANOS2;RAB7A
Synthesis, Secretion, And Inactivation Of Glucose-dependent Insulinotropic Polypeptide (GIP) R-HSA-400511	2/13	0.124406	0.509685	3.65152	7.61051	PAX6;FFAR1
TNFR1-induced Proapoptotic Signaling R-HSA-5357786	2/13	0.124406	0.509685	3.65152	7.61051	CYLD;CASP8
Trafficking And Processing Of Endosomal TLR R-HSA-1679131	2/13	0.124406	0.509685	3.65152	7.61051	TLR7;LGMN
PCP/CE Pathway R-HSA-4086400	7/88	0.124723	0.509685	1.73838	3.61873	WNT5B;DAAM1;PSMD13;PSMD2;NCOA3;PSME1;AP2M1
Ion Channel Transport R-HSA-983712	12/175	0.129527	0.526943	1.48236	3.02974	RYR1;FXYD6-FXYD2;TTYH3;WNK1;FXYD2;TSC22D3;ATP10D;ATP13A5;ATP1A2;CLIC2;NALCN;TPCN1
Glucose Metabolism R-HSA-70326	7/89	0.130186	0.526943	1.71709	3.5008	PKM;PPP2R1A;NUP50;NUP62;NUP43;SLC25A12;NUP58
Peptide Hormone Metabolism R-HSA-2980736	7/89	0.130186	0.526943	1.71709	3.5008	KIF5C;EXOC7;ANPEP;EXOC4;CTNNB1;PAX6;FFAR1
Immunoregulatory Interactions Between A Lymphoid And A non-Lymphoid Cell R-HSA-198933	9/123	0.131096	0.52831	1.58868	3.22792	CD40;CD200R1;CD40LG;SIGLEC1;CD1C;FCGR2B;CD22;MICA;SIGLEC6
PI5P, PP2A And IER3 Regulate PI3K/AKT Signaling R-HSA-6811558	8/106	0.131374	0.52831	1.64236	3.33351	NRG3;PPP2R1A;PIP4K2A;PIP4K2B;PIK3R1;ICOS;ESR1;FGFR1
Cytoprotection By HMOX1 R-HSA-9707564	5/57	0.133154	0.52831	1.93305	3.89751	MBD4;NCOR1;CHD9;SIN3A;TXNIP
Neurexins And Neuroligins R-HSA-6794361	5/57	0.133154	0.52831	1.93305	3.89751	DBNL;EPB41L1;EPB41L2;LRRTM2;EPB41L3
tRNA Processing In Nucleus R-HSA-6784531	5/57	0.133154	0.52831	1.93305	3.89751	CPSF1;NUP50;NUP62;NUP43;NUP58
Disorders Of Transmembrane Transporters R-HSA-5619115	12/176	0.133388	0.52831	1.47324	2.96784	VCP;OS9;PSMD13;PSMD2;SLC22A18;NUP50;SLC9A9;SLC33A1;NUP62;PSME1;NUP43;NUP58
Signaling By Interleukins R-HSA-449147	27/453	0.133959	0.52831	1.27887	2.57081	CSF1R;CTF1;PSMD13;PIK3R1;FOXO3;CRKL;CASP8;H3C13;PPP2R1A;PSMD2;MAP3K3;NANOS2;CCL22;POU2F1;STAT1;IL11RA;MMP1;IL10RA;IL34;IL16;NFKB1;SMARCA4;FCER2;MTAP;PSME1;PTPN7;IL7R
BMAL1:CLOCK,NPAS2 Activates Circadian Gene Expression R-HSA-1368108	3/27	0.134667	0.52831	2.51135	5.03513	MBD4;CHD9;BHLHE41
Insulin Processing R-HSA-264876	3/27	0.134667	0.52831	2.51135	5.03513	KIF5C;EXOC7;EXOC4
RNA Pol II CTD Phosphorylation And Interaction With CE R-HSA-77075	3/27	0.134667	0.52831	2.51135	5.03513	RNGTT;ERCC3;POLR2D
Interleukin-4 And Interleukin-13 Signaling R-HSA-6785807	8/107	0.136476	0.532033	1.62568	3.23772	NANOS2;FCER2;POU2F1;CCL22;MMP1;STAT1;PIK3R1;FOXO3
Cleavage Of Damaged Pyrimidine R-HSA-110329	4/42	0.137285	0.532033	2.1155	4.20074	MBD4;H2BC26;H2AC7;POT1
NS1 Mediated Effects On Host Pathways R-HSA-168276	4/42	0.137285	0.532033	2.1155	4.20074	NUP50;NUP62;NUP43;NUP58
RHOF GTPase Cycle R-HSA-9035034	4/42	0.137285	0.532033	2.1155	4.20074	PIK3R1;RHOF;FAM169A;RAB7A
Activation Of NMDA Receptors And Postsynaptic Events R-HSA-442755	6/74	0.139124	0.532563	1.77424	3.49949	RASGRF1;PRKX;MAPT;ADCY1;CAMKK2;GRIA4
Cell Death Signaling Via NRAGE, NRIF And NADE R-HSA-204998	6/74	0.139124	0.532563	1.77424	3.49949	APH1A;AKAP13;TIAM1;APH1B;ARHGEF1;PSEN1
Formation Of RNA Pol II Elongation Complex R-HSA-112382	5/58	0.140395	0.532563	1.89648	3.72334	ERCC3;CTR9;POLR2D;EAF1;RTF1
Late SARS-CoV-2 Infection Events R-HSA-9772573	5/58	0.140395	0.532563	1.89648	3.72334	ST6GAL1;UBE2I;PRKCSH;MGAT4A;ST3GAL4
Physiological Factors R-HSA-5578768	2/14	0.140764	0.532563	3.34705	6.56246	NPPC;TBX5
RUNX3 Regulates NOTCH Signaling R-HSA-8941856	2/14	0.140764	0.532563	3.34705	6.56246	SNW1;RBPJ
Regulation Of IFNG Signaling R-HSA-877312	2/14	0.140764	0.532563	3.34705	6.56246	STAT1;PIAS1
TP53 Regulates Transcription Of Additional Cell Death Genes With Uncertain Roles In P53-Dependent Apoptosis R-HSA-6803205	2/14	0.140764	0.532563	3.34705	6.56246	TP53BP2;NDRG1
Disease R-HSA-1643685	92/1736	0.143257	0.540393	1.13527	2.20595	NRP1;PRKCSH;RBPJ;SGSH;SPRED2;SPRED1;H2BC26;DUSP10;CASP8;SIN3A;PPP2R1A;PSMD2;SLC22A18;CNTRL;NUP62;ADAMTSL2;CHMP1A;MYO18A;TOPBP1;AP2M1;VPS39;NANOS2;ST6GAL1;PARP1;H2AC7;ATRX;ATG14;TGFBR2;ADAM17;NCOR1;NRG3;IRF3;CYP2U1;NUP50;SLC9A9;PSME1;ELMO1;TXNIP;TLR10;TLR7;MASP1;TLR5;NUP58;RAB7A;NOTCH2;VCP;PSMD13;PRKX;ATP1A2;ZC3HAV1;PIK3R1;PSEN1;ADCY1;FOXO3;APH1A;APH1B;H3C13;OS9;MVB12B;POLR2D;ST3GAL4;NUP43;ICOS;EP…
Sensory Processing Of Sound R-HSA-9659379	6/75	0.145563	0.545186	1.74843	3.36949	EPS8;TMC1;EPB41L1;DNAJC5;EPB41L3;CIB2
Antigen Presentation: Folding, Assembly, Peptide Loading Of Class I MHC R-HSA-983170	3/28	0.145811	0.545186	2.41077	4.64181	ERAP1;ATG14;TAPBP
Downstream Signal Transduction R-HSA-186763	3/28	0.145811	0.545186	2.41077	4.64181	STAT1;PIK3R1;CRKL
Signaling By B Cell Receptor (BCR) R-HSA-983705	8/109	0.146976	0.547936	1.59332	3.05518	BLK;PSMD13;PSMD2;PSME1;REL;PIK3R1;NFKB1;CD22
RNA Polymerase I Promoter Escape R-HSA-73772	5/59	0.147804	0.549418	1.86126	3.55848	H2BC26;RRN3;H3C13;ERCC3;H2AC7
Protein Ubiquitination R-HSA-8852135	6/76	0.152135	0.560592	1.72337	3.24507	SHPRH;VCP;USP9X;CTR9;RTF1;UBE2Z
Aspirin ADME R-HSA-9749641	4/44	0.155013	0.560592	2.00951	3.74623	CYP2C9;CYP2C8;UGT2B28;CES2
Base-Excision Repair, AP Site Formation R-HSA-73929	4/44	0.155013	0.560592	2.00951	3.74623	MBD4;H2BC26;H2AC7;POT1
TP53 Regulates Transcription Of Cell Death Genes R-HSA-5633008	4/44	0.155013	0.560592	2.00951	3.74623	CASP10;TP53BP2;ATM;NDRG1
Defective CFTR Causes Cystic Fibrosis R-HSA-5678895	5/60	0.155376	0.560592	1.82732	3.40231	VCP;OS9;PSMD13;PSMD2;PSME1
HDACs Deacetylate Histones R-HSA-3214815	5/60	0.155376	0.560592	1.82732	3.40231	H2BC26;NCOR1;H3C13;H2AC7;GATAD2B
FOXO-mediated Transcription Of Oxidative Stress, Metabolic And Neuronal Genes R-HSA-9615017	3/29	0.157242	0.560592	2.31793	4.2881	SIN3A;ABCA6;FOXO3
Interaction Between L1 And Ankyrins R-HSA-445095	3/29	0.157242	0.560592	2.31793	4.2881	KCNQ2;ANK2;ANK1
Myogenesis R-HSA-525793	3/29	0.157242	0.560592	2.31793	4.2881	TCF12;CTNNB1;MEF2D
Processing Of Capped Intronless Pre-mRNA R-HSA-75067	3/29	0.157242	0.560592	2.31793	4.2881	NUDT21;CPSF7;CPSF1
Regulation Of TP53 Activity Thru Acetylation R-HSA-6804758	3/29	0.157242	0.560592	2.31793	4.2881	PIP4K2A;PIP4K2B;GATAD2B
Regulation Of Necroptotic Cell Death R-HSA-5675482	3/29	0.157242	0.560592	2.31793	4.2881	CASP8;CFLAR;BIRC3
mRNA Capping R-HSA-72086	3/29	0.157242	0.560592	2.31793	4.2881	RNGTT;ERCC3;POLR2D
CTNNB1 S33 Mutants Not Phosphorylated R-HSA-5358747	2/15	0.157544	0.560592	3.08942	5.7094	PPP2R1A;CTNNB1
Organic Cation/Anion/Zwitterion Transport R-HSA-549132	2/15	0.157544	0.560592	3.08942	5.7094	SLC22A18;RUNX1
Cellular Response To Chemical Stress R-HSA-9711123	12/182	0.157845	0.560592	1.4208	2.62299	MBD4;VCP;NCOR1;PSMD13;CHD9;SIN3A;PSMD2;SESN1;TXNRD1;PSME1;TXNIP;SOD3
RHOA GTPase Cycle R-HSA-8980692	10/147	0.161952	0.573581	1.46863	2.67357	TIAM1;AKAP13;OPHN1;DAAM1;PRKCSH;ARHGEF1;PIK3R1;ARHGAP26;ARHGAP45;ARHGAP4
DNA Damage/Telomere Stress Induced Senescence R-HSA-2559586	5/61	0.163104	0.574467	1.7946	3.25427	H1-5;H2BC26;H2AC7;POT1;ATM
Post NMDA Receptor Activation Events R-HSA-438064	5/61	0.163104	0.574467	1.7946	3.25427	RASGRF1;PRKX;MAPT;ADCY1;CAMKK2
ERCC6 (CSB) And EHMT2 (G9a) Positively Regulate rRNA Expression R-HSA-427389	4/45	0.164181	0.575086	1.9604	3.54201	H2BC26;H3C13;H2AC7;GATAD2B
TBC/RABGAPs R-HSA-8854214	4/45	0.164181	0.575086	1.9604	3.54201	GGA2;GGA1;RABEP1;RAB7A
RNA Polymerase I Promoter Clearance R-HSA-73854	6/78	0.165664	0.577491	1.67532	3.01187	H2BC26;RRN3;H3C13;ERCC3;H2AC7;GATAD2B
Host Interactions Of HIV Factors R-HSA-162909	9/130	0.165774	0.577491	1.49622	2.6889	PSMD13;PSMD2;NUP50;NUP62;ELMO1;PSME1;NUP43;AP2M1;NUP58
Negative Regulation Of PI3K/AKT Network R-HSA-199418	8/113	0.169106	0.587494	1.5323	2.72325	NRG3;PPP2R1A;PIP4K2A;PIP4K2B;PIK3R1;ICOS;ESR1;FGFR1
RNA Polymerase I Transcription R-HSA-73864	6/79	0.172614	0.593879	1.65228	2.90256	H2BC26;RRN3;H3C13;ERCC3;H2AC7;GATAD2B
Nucleotide-like (Purinergic) Receptors R-HSA-418038	2/16	0.17467	0.593879	2.8686	5.00528	P2RY14;P2RY1
PI3K Events In ERBB2 Signaling R-HSA-1963642	2/16	0.17467	0.593879	2.8686	5.00528	NRG3;PIK3R1
Regulation Of Gene Expression In Late Stage (Branching Morphogenesis) Pancreatic Bud Precursor Cells R-HSA-210744	2/16	0.17467	0.593879	2.8686	5.00528	SNW1;RBPJ
SUMOylation Of DNA Methylation Proteins R-HSA-4655427	2/16	0.17467	0.593879	2.8686	5.00528	UBE2I;PHC3
Sema3A PAK Dependent Axon Repulsion R-HSA-399954	2/16	0.17467	0.593879	2.8686	5.00528	NRP1;LIMK1
Signaling By NTRK3 (TRKC) R-HSA-9034015	2/16	0.17467	0.593879	2.8686	5.00528	PTPRS;PIK3R1
NLRP3 Inflammasome R-HSA-844456	2/16	0.17467	0.593879	2.8686	5.00528	TXNIP;NFKB1
Cilium Assembly R-HSA-5617833	12/186	0.175337	0.594561	1.38784	2.41629	CEP57;C2CD3;PPP2R1A;EXOC7;SEPTIN2;NDE1;INPP5E;CNTRL;EXOC4;BBS9;ASAP1;CKAP5
Signaling By NTRKs R-HSA-166520	9/132	0.176409	0.59661	1.47173	2.55338	TIAM1;PTPRS;PPP2R1A;TCF12;PIK3R1;MEF2D;AP2M1;CRKL;MAPK13
Anchoring Of Basal Body To Plasma Membrane R-HSA-5620912	7/97	0.177933	0.598586	1.5638	2.69967	CEP57;C2CD3;PPP2R1A;SEPTIN2;NDE1;CNTRL;CKAP5
Potential Therapeutics For SARS R-HSA-9679191	7/97	0.177933	0.598586	1.5638	2.69967	FXYD6-FXYD2;FXYD2;TLR7;ATP1A2;AP2M1;GATAD2B;BRD4
Signaling By MET R-HSA-6806834	5/63	0.179004	0.599001	1.73253	2.98055	PTPRJ;SPINT2;PIK3R1;EPS15;CRKL
RNA Polymerase II Pre-transcription Events R-HSA-674695	6/80	0.179681	0.599001	1.62987	2.79778	ERCC3;CTR9;POLR2D;EAF1;TAF6;RTF1
Antigen Activates B Cell Receptor Leading To Second Messenger Generation R-HSA-983695	3/31	0.180875	0.599001	2.15213	3.68004	BLK;PIK3R1;CD22
Diseases Associated With TLR Signaling Cascade R-HSA-5602358	3/31	0.180875	0.599001	2.15213	3.68004	TLR10;TLR5;NFKB1
RIPK1-mediated Regulated Necrosis R-HSA-5213460	3/31	0.180875	0.599001	2.15213	3.68004	CASP8;CFLAR;BIRC3
RUNX2 Regulates Bone Development R-HSA-8941326	3/31	0.180875	0.599001	2.15213	3.68004	COL1A1;SMAD6;GLI2
TCR Signaling R-HSA-202403	8/116	0.186635	0.607687	1.4895	2.50028	PSMD13;PSMD2;PSME1;PRKCQ;PTPRJ;PIK3R1;PAG1;NFKB1
Centrosome Maturation R-HSA-380287	6/81	0.186862	0.607687	1.60805	2.69732	CEP57;PPP2R1A;NDE1;CNTRL;TUBGCP6;CKAP5
DDX58/IFIH1-mediated Induction Of Interferon-Alpha/Beta R-HSA-168928	6/81	0.186862	0.607687	1.60805	2.69732	CYLD;CASP8;IRF3;UBA7;CASP10;NFKB1
Regulation Of HSF1-mediated Heat Shock Response R-HSA-3371453	6/81	0.186862	0.607687	1.60805	2.69732	NUP50;NUP62;COL4A6;NUP43;ATM;NUP58
Gap-filling DNA Repair Synthesis And Ligation In TC-NER R-HSA-6782210	5/64	0.187164	0.607687	1.70308	2.85396	DDB1;AQR;ERCC3;UVSSA;POLR2D
Asparagine N-linked Glycosylation R-HSA-446203	17/282	0.187668	0.607687	1.29161	2.16097	NSF;ST6GAL1;VCP;TRAPPC2L;ST8SIA1;PRKCSH;EDEM1;FUCA1;PMM2;SYVN1;ANK2;ANK1;OS9;MGAT4A;PPP6R3;ST3GAL4;COPE
Cellular Response To Heat Stress R-HSA-3371556	7/99	0.190901	0.607687	1.52965	2.5331	VCP;NUP50;NUP62;COL4A6;ATM;NUP43;NUP58
SLC Transporter Disorders R-HSA-5619102	7/99	0.190901	0.607687	1.52965	2.5331	SLC22A18;NUP50;SLC9A9;SLC33A1;NUP62;NUP43;NUP58
SARS-CoV-2 Infection R-HSA-9694516	17/283	0.19145	0.607687	1.28669	2.12706	NRP1;ST6GAL1;VCP;UBE2I;STAT1;PRKCSH;ATG14;IRF3;NUP50;MGAT4A;NUP62;ST3GAL4;TLR7;NUP43;MASP1;VPS39;NUP58
Activation Of IRF3/IRF7 Mediated By TBK1/IKK Epsilon R-HSA-936964	2/17	0.192072	0.607687	2.67722	4.4171	IRF3;TMED7-TICAM2
Beta-catenin Phosphorylation Cascade R-HSA-196299	2/17	0.192072	0.607687	2.67722	4.4171	PPP2R1A;CTNNB1
Biosynthesis Of DHA-derived SPMs R-HSA-9018677	2/17	0.192072	0.607687	2.67722	4.4171	CYP2C9;CYP2C8
FOXO-mediated Transcription Of Cell Cycle Genes R-HSA-9617828	2/17	0.192072	0.607687	2.67722	4.4171	CCNG2;FOXO3
GAB1 Signalosome R-HSA-180292	2/17	0.192072	0.607687	2.67722	4.4171	PIK3R1;PAG1
Gastrulation R-HSA-9758941	2/17	0.192072	0.607687	2.67722	4.4171	CTNNB1;TRIM33
IL-6-type Cytokine Receptor Ligand Interactions R-HSA-6788467	2/17	0.192072	0.607687	2.67722	4.4171	CTF1;IL11RA
NOTCH1 Intracellular Domain Regulates Transcription R-HSA-2122947	4/48	0.19278	0.607687	1.82645	3.00671	TLE3;NCOR1;SNW1;RBPJ
Retrograde Transport At Trans-Golgi-Network R-HSA-6811440	4/48	0.19278	0.607687	1.82645	3.00671	TGOLN2;NSF;AKR1B10;STX16
Signaling By Hedgehog R-HSA-5358351	9/135	0.192925	0.607687	1.43647	2.36364	ADAM17;VCP;OS9;PSMD13;PSMD2;PSME1;SYVN1;ADCY1;GLI2
RNA Polymerase I Promoter Opening R-HSA-73728	3/32	0.19303	0.607687	2.07781	3.41782	H2BC26;H3C13;H2AC7
Cytochrome P450 - Arranged By Substrate Type R-HSA-211897	5/65	0.195456	0.612301	1.6746	2.73366	CYP2C9;CYP2C8;CYP2B6;CYP2U1;CYP11B1
FOXO-mediated Transcription R-HSA-9614085	5/65	0.195456	0.612301	1.6746	2.73366	SIN3A;ABCA6;CCNG2;TXNIP;FOXO3
M Phase R-HSA-68886	22/380	0.197302	0.613372	1.23779	2.00896	CEP57;NEK9;UBE2I;NUMA1;H2AC7;PSMD13;NDE1;CKAP5;MAU2;H2BC26;H3C13;PPP2R1A;PSMD2;NUP50;CNTRL;NUP62;PSME1;TUBGCP6;NUP43;BUB3;LPIN2;NUP58
Stimuli-sensing Channels R-HSA-2672351	7/100	0.197524	0.613372	1.51312	2.45412	RYR1;TTYH3;WNK1;TSC22D3;CLIC2;NALCN;TPCN1
Late Phase Of HIV Life Cycle R-HSA-162599	9/136	0.198573	0.613372	1.42508	2.30378	RNGTT;ERCC3;NUP50;NUP62;MVB12B;POLR2D;NUP43;TAF6;NUP58
HIV Infection R-HSA-162906	14/229	0.201618	0.613372	1.31033	2.09833	RNGTT;PSMD13;ERCC3;PSMD2;NUP50;NUP62;MVB12B;POLR2D;PSME1;ELMO1;NUP43;TAF6;AP2M1;NUP58
Signaling By EGFR R-HSA-177929	4/49	0.202639	0.613372	1.78576	2.85067	ADAM17;PIK3R1;EPS15;PAG1
Activation Of NF-kappaB In B Cells R-HSA-1169091	5/66	0.203872	0.613372	1.64706	2.61926	PSMD13;PSMD2;PSME1;REL;NFKB1
Homology Directed Repair R-HSA-5693538	8/119	0.2049	0.613372	1.44902	2.29703	RAD52;UBE2I;H2BC26;PARP1;RAD17;ATM;TOPBP1;SPIDR
Developmental Biology R-HSA-1266738	57/1073	0.205232	0.613372	1.13298	1.7942	NRP1;NRP2;PLXND1;CHD9;RBPJ;YY1;H2BC26;PSMD2;AP2M1;H2AC7;DCC;NCOA3;TCF12;ANK2;PAX6;ANK1;GFRA2;MED6;RUNX1;DOK1;TIAM1;MED24;NCOR1;KCNQ2;COL6A1;PSME1;DCX;PRKCQ;ITGA5;IVL;KMT2A;PSMD13;PIK3R1;PSEN1;FOXO3;APH1A;APH1B;H3C13;FAM120B;ADAM23;POLR2D;MEF2D;MBD4;ST14;KRTAP4-9;CD72;LIMK1;FLI1;NFKB1;SMARCA4;KLK12;MAPK13;SNW1;MAFB;CTNNB1;TRIM33;FGFR1
Amino Acid Transport Across Plasma Membrane R-HSA-352230	3/33	0.205381	0.613372	2.00845	3.17915	SLC1A4;SLC1A5;SLC38A4
CaM Pathway R-HSA-111997	3/33	0.205381	0.613372	2.00845	3.17915	PRKX;ADCY1;CAMKK2
Oncogene Induced Senescence R-HSA-2559585	3/33	0.205381	0.613372	2.00845	3.17915	AGO1;TNRC6A;TNRC6B
Packaging Of Telomere Ends R-HSA-171306	3/33	0.205381	0.613372	2.00845	3.17915	H2BC26;H2AC7;POT1
Sialic Acid Metabolism R-HSA-4085001	3/33	0.205381	0.613372	2.00845	3.17915	ST6GAL1;ST8SIA1;ST3GAL4
Degradation Of Beta-Catenin By Destruction Complex R-HSA-195253	6/84	0.209047	0.613372	1.54596	2.41972	TLE3;PPP2R1A;PSMD13;PSMD2;PSME1;CTNNB1
LDL Clearance R-HSA-8964038	2/18	0.209684	0.613372	2.50976	3.92063	NCEH1;AP2M1
Pre-NOTCH Processing In Golgi R-HSA-1912420	2/18	0.209684	0.613372	2.50976	3.92063	NOTCH2;ST3GAL4
RORA Activates Gene Expression R-HSA-1368082	2/18	0.209684	0.613372	2.50976	3.92063	MBD4;CHD9
Regulation Of Signaling By CBL R-HSA-912631	2/18	0.209684	0.613372	2.50976	3.92063	PIK3R1;CRKL
Signaling By FLT3 Fusion Proteins R-HSA-9703465	2/18	0.209684	0.613372	2.50976	3.92063	MYO18A;PIK3R1
Membrane Trafficking R-HSA-199991	33/599	0.211805	0.613372	1.17523	1.82406	DENND1B;STX16;COPS7A;UBE2Z;GGA2;TGOLN2;GGA1;KIF5C;PPP6R3;FCHO2;MVB12B;EPS15;AP2M1;TPD52;NSF;TRAPPC2L;FNBP1;EXOC7;ANK2;ANK1;EPN2;SNX18;RAB30;NECAP2;AKR1B10;RABEP1;TBC1D4;DNAJC6;EXOC4;IL7R;RIN2;COPE;RAB7A
Aquaporin-mediated Transport R-HSA-445717	4/50	0.212644	0.613372	1.74685	2.70436	MINDY4;AQP5;ADCY1;AQP2
Neurotransmitter Release Cycle R-HSA-112310	4/50	0.212644	0.613372	1.74685	2.70436	GLS2;DNAJC5;SLC1A2;PPFIA4
Regulation Of TP53 Activity R-HSA-5633007	10/157	0.213704	0.613372	1.368	2.11105	PPP2R1A;SMYD2;TP53BP2;PIP4K2A;RAD17;PIP4K2B;ATM;TAF6;TOPBP1;GATAD2B
PTEN Regulation R-HSA-6807070	9/139	0.215924	0.613372	1.39197	2.13366	VAPA;PSMD13;PSMD2;AGO1;PSME1;PHC3;GATAD2B;TNRC6A;TNRC6B
Activated NTRK2 Signals Thru CDK5 R-HSA-9032845	1/5	0.216003	0.613372	5.01739	7.68896	TIAM1
Attachment And Entry R-HSA-9678110	1/5	0.216003	0.613372	5.01739	7.68896	VCP
Defective LFNG Causes SCDO3 R-HSA-5083630	1/5	0.216003	0.613372	5.01739	7.68896	NOTCH2
Defective RIPK1-mediated Regulated Necrosis R-HSA-9693928	1/5	0.216003	0.613372	5.01739	7.68896	CASP8
Ficolins Bind To Repetitive Carbohydrate Structures On Target Cell Surface R-HSA-2855086	1/5	0.216003	0.613372	5.01739	7.68896	MASP1
Free Fatty Acid Receptors R-HSA-444209	1/5	0.216003	0.613372	5.01739	7.68896	FFAR1
IRF3 Mediated Activation Of Type 1 IFN R-HSA-1606341	1/5	0.216003	0.613372	5.01739	7.68896	IRF3
Maturation Of Spike Protein R-HSA-9683686	1/5	0.216003	0.613372	5.01739	7.68896	PRKCSH
RUNX1 Regulates Expression Of Components Of Tight Junctions R-HSA-8935964	1/5	0.216003	0.613372	5.01739	7.68896	RUNX1
RUNX1 Regulates Transcription Of Genes Involved In Interleukin Signaling R-HSA-8939247	1/5	0.216003	0.613372	5.01739	7.68896	RUNX1
RUNX2 Regulates Chondrocyte Maturation R-HSA-8941284	1/5	0.216003	0.613372	5.01739	7.68896	GLI2
RUNX3 Regulates BCL2L11 (BIM) Transcription R-HSA-8952158	1/5	0.216003	0.613372	5.01739	7.68896	FOXO3
Signaling By MST1 R-HSA-8852405	1/5	0.216003	0.613372	5.01739	7.68896	SPINT2
Synthesis Of GDP-mannose R-HSA-446205	1/5	0.216003	0.613372	5.01739	7.68896	PMM2
Synthesis Of PIPs At ER Membrane R-HSA-1483248	1/5	0.216003	0.613372	5.01739	7.68896	MTMR2
TFAP2 (AP-2) Family Regulates Transcription Of Cell Cycle Factors R-HSA-8866911	1/5	0.216003	0.613372	5.01739	7.68896	TFAP2A
TFAP2A Acts As A Transcriptional Repressor During Retinoic Acid Induced Cell Differentiation R-HSA-8869496	1/5	0.216003	0.613372	5.01739	7.68896	TFAP2A
Vitamin B1 (Thiamin) Metabolism R-HSA-196819	1/5	0.216003	0.613372	5.01739	7.68896	TPK1
DNA Methylation R-HSA-5334118	3/34	0.217904	0.617396	1.94356	2.9614	H2BC26;H3C13;H2AC7
RAF/MAP Kinase Cascade R-HSA-5673001	16/271	0.219372	0.620177	1.26263	1.91539	PSMD13;RASGRF1;PIK3R1;GFRA2;SPRED2;SPRED1;DUSP10;RASGEF1A;NRG3;PPP2R1A;PSMD2;PSME1;NF1;PRKCQ;PTPN7;FGFR1
Infectious Disease R-HSA-5663205	51/961	0.222574	0.626338	1.13085	1.6991	NRP1;PRKCSH;H2BC26;PSMD2;NUP62;CHMP1A;AP2M1;VPS39;NANOS2;ST6GAL1;PARP1;H2AC7;ATG14;ADAM17;NCOR1;IRF3;NUP50;PSME1;ELMO1;TXNIP;TLR7;MASP1;NUP58;RAB7A;VCP;PSMD13;PRKX;ATP1A2;ADCY1;H3C13;MVB12B;POLR2D;ST3GAL4;NUP43;EPS15;WASF2;BRD4;GGT5;FXYD6-FXYD2;UBE2I;RNGTT;STAT1;TXNRD1;GATAD2B;NFKB1;ERCC3;FXYD2;MGAT4A;ABI1;CTNNB1;TAF6
Autodegradation Of E3 Ubiquitin Ligase COP1 R-HSA-349425	4/51	0.222783	0.626338	1.70959	2.56705	PSMD13;PSMD2;PSME1;ATM
Signaling By FGFR R-HSA-190236	6/86	0.224328	0.626338	1.50715	2.25266	SPRED2;SPRED1;PPP2R1A;POLR2D;PIK3R1;FGFR1
MHC Class II Antigen Presentation R-HSA-2132295	7/104	0.224875	0.626338	1.45042	2.16433	KIF5C;CTSH;HLA-DOA;HLA-DOB;AP2M1;LGMN;RAB7A
Biosynthesis Of Specialized Proresolving Mediators (SPMs) R-HSA-9018678	2/19	0.227447	0.626338	2.362	3.49774	CYP2C9;CYP2C8
Listeria Monocytogenes Entry Into Host Cells R-HSA-8876384	2/19	0.227447	0.626338	2.362	3.49774	CTNNB1;EPS15
Other Semaphorin Interactions R-HSA-416700	2/19	0.227447	0.626338	2.362	3.49774	CD72;PLXND1
PKA-mediated Phosphorylation Of CREB R-HSA-111931	2/19	0.227447	0.626338	2.362	3.49774	PRKX;ADCY1
Regulation Of TP53 Activity Thru Methylation R-HSA-6804760	2/19	0.227447	0.626338	2.362	3.49774	SMYD2;ATM
Scavenging By Class A Receptors R-HSA-3000480	2/19	0.227447	0.626338	2.362	3.49774	COL1A1;MASP1
Signaling By KIT In Disease R-HSA-9669938	2/19	0.227447	0.626338	2.362	3.49774	STAT1;PIK3R1
Signaling By PDGFR In Disease R-HSA-9671555	2/19	0.227447	0.626338	2.362	3.49774	STAT1;PIK3R1
Loss Of Nlp From Mitotic Centrosomes R-HSA-380259	5/69	0.229805	0.628185	1.56961	2.30815	CEP57;PPP2R1A;NDE1;CNTRL;CKAP5
Ca-dependent Events R-HSA-111996	3/35	0.23058	0.628185	1.88272	2.76225	PRKX;ADCY1;CAMKK2
Impaired BRCA2 Binding To RAD51 R-HSA-9709570	3/35	0.23058	0.628185	1.88272	2.76225	RAD17;ATM;TOPBP1
Negative Regulators Of DDX58/IFIH1 Signaling R-HSA-936440	3/35	0.23058	0.628185	1.88272	2.76225	CYLD;UBA7;IRF3
tRNA Processing R-HSA-72306	7/105	0.231911	0.628185	1.43554	2.0979	CPSF1;NUP50;URM1;NUP62;TYW1;NUP43;NUP58
Fcgamma Receptor (FCGR) Dependent Phagocytosis R-HSA-2029480	6/87	0.232102	0.628185	1.48847	2.17402	PRKCSH;LIMK1;ABI1;ELMO1;PIK3R1;WASF2
TCF Dependent Signaling In Response To WNT R-HSA-201681	12/198	0.232943	0.628185	1.29748	1.89037	TLE3;SFRP1;H2BC26;H3C13;PPP2R1A;H2AC7;PSMD13;PSMD2;PSME1;CTNNB1;KLHL12;SMARCA4
Metabolism Of Non-Coding RNA R-HSA-194441	4/52	0.233044	0.628185	1.67389	2.43806	NUP50;NUP62;NUP43;NUP58
RHOD GTPase Cycle R-HSA-9013405	4/52	0.233044	0.628185	1.67389	2.43806	ANKFY1;PIK3R1;ARHGAP26;RAB7A
Signaling By Non-Receptor Tyrosine Kinases R-HSA-9006927	4/52	0.233044	0.628185	1.67389	2.43806	DOK1;KHDRBS2;NRG3;ELMO1
Toll-like Receptor Cascades R-HSA-168898	10/162	0.241828	0.641809	1.32265	1.87754	CASP8;IRF3;PPP2R1A;TMED7-TICAM2;TLR10;TLR7;TLR5;NFKB1;LGMN;BIRC3
RHOH GTPase Cycle R-HSA-9013407	3/36	0.243386	0.641809	1.82557	2.57973	VCP;SLC1A5;RAB7A
MAPK1/MAPK3 Signaling R-HSA-5684996	16/277	0.245158	0.641809	1.23321	1.73371	PSMD13;RASGRF1;PIK3R1;GFRA2;SPRED2;SPRED1;DUSP10;RASGEF1A;NRG3;PPP2R1A;PSMD2;PSME1;NF1;PRKCQ;PTPN7;FGFR1
Phosphorylation Of CD3 And TCR Zeta Chains R-HSA-202427	2/20	0.245307	0.641809	2.23066	3.13462	PTPRJ;PAG1
TP53 Regulates Transcription Of Genes Involved In Cytochrome C Release R-HSA-6803204	2/20	0.245307	0.641809	2.23066	3.13462	TP53BP2;ATM
Diseases Of Programmed Cell Death R-HSA-9645723	5/71	0.247595	0.641809	1.52189	2.1245	CASP8;H2BC26;H3C13;H2AC7;FOXO3
Mitochondrial Biogenesis R-HSA-1592230	6/89	0.247895	0.641809	1.45245	2.0258	MBD4;NCOR1;CHD9;NR1D1;MEF2D;HCFC1
G2/M Transition R-HSA-69275	11/182	0.248311	0.641809	1.29333	1.80171	CEP57;LIN37;PPP2R1A;PSMD13;PSMD2;NDE1;CNTRL;PSME1;TUBGCP6;PPP2R3B;CKAP5
Cardiac Conduction R-HSA-5576891	8/126	0.250027	0.641809	1.36255	1.88875	RYR1;NPPC;FXYD6-FXYD2;DMPK;FXYD2;ATP1A2;CLIC2;TBX5
Activated NTRK2 Signals Thru PI3K R-HSA-9028335	1/6	0.253252	0.641809	4.0137	5.51229	PIK3R1
Activated NTRK3 Signals Thru PI3K R-HSA-9603381	1/6	0.253252	0.641809	4.0137	5.51229	PIK3R1
CD22 Mediated BCR Regulation R-HSA-5690714	1/6	0.253252	0.641809	4.0137	5.51229	CD22
FGFR1b Ligand Binding And Activation R-HSA-190370	1/6	0.253252	0.641809	4.0137	5.51229	FGFR1
Fibronectin Matrix Formation R-HSA-1566977	1/6	0.253252	0.641809	4.0137	5.51229	ITGA5
MET Receptor Activation R-HSA-6806942	1/6	0.253252	0.641809	4.0137	5.51229	SPINT2
MET Activates PI3K/AKT Signaling R-HSA-8851907	1/6	0.253252	0.641809	4.0137	5.51229	PIK3R1
Methionine Salvage Pathway R-HSA-1237112	1/6	0.253252	0.641809	4.0137	5.51229	MTAP
Microbial Modulation Of RIPK1-mediated Regulated Necrosis R-HSA-9686347	1/6	0.253252	0.641809	4.0137	5.51229	CASP8
Pre-NOTCH Processing In Endoplasmic Reticulum R-HSA-1912399	1/6	0.253252	0.641809	4.0137	5.51229	NOTCH2
RUNX3 Regulates Immune Response And Cell Migration R-HSA-8949275	1/6	0.253252	0.641809	4.0137	5.51229	CXXC1
SMAD2/3 Phosphorylation Motif Mutants In Cancer R-HSA-3304356	1/6	0.253252	0.641809	4.0137	5.51229	TGFBR2
SUMO Is Transferred From E1 To E2 (UBE2I, UBC9) R-HSA-3065678	1/6	0.253252	0.641809	4.0137	5.51229	UBE2I
Sensing Of DNA Double Strand Breaks R-HSA-5693548	1/6	0.253252	0.641809	4.0137	5.51229	ATM
Synthesis Of 15-Eicosatetraenoic Acid Derivatives R-HSA-2142770	1/6	0.253252	0.641809	4.0137	5.51229	ALOX15B
Synthesis Of Wybutosine At G37 Of tRNA(Phe) R-HSA-6782861	1/6	0.253252	0.641809	4.0137	5.51229	TYW1
TLR3-mediated TICAM1-dependent Programmed Cell Death R-HSA-9013957	1/6	0.253252	0.641809	4.0137	5.51229	CASP8
Uptake And Function Of Diphtheria Toxin R-HSA-5336415	1/6	0.253252	0.641809	4.0137	5.51229	TXNRD1
Transport To Golgi And Subsequent Modification R-HSA-948021	10/164	0.253437	0.641809	1.30533	1.79175	NSF;ST6GAL1;TRAPPC2L;FUCA1;MGAT4A;PPP6R3;ST3GAL4;ANK2;ANK1;COPE
AUF1 (hnRNP D0) Binds And Destabilizes mRNA R-HSA-450408	4/54	0.253892	0.641809	1.60677	2.20263	PSMD13;PSMD2;PSME1;HNRNPD
Cleavage Of Damaged Purine R-HSA-110331	3/37	0.256302	0.641809	1.77179	2.41211	H2BC26;H2AC7;POT1
FLT3 Signaling R-HSA-9607240	3/37	0.256302	0.641809	1.77179	2.41211	PTPRJ;PIK3R1;FOXO3
SIRT1 Negatively Regulates rRNA Expression R-HSA-427359	3/37	0.256302	0.641809	1.77179	2.41211	H2BC26;H3C13;H2AC7
AURKA Activation By TPX2 R-HSA-8854518	5/72	0.25662	0.641809	1.49909	2.03901	CEP57;PPP2R1A;NDE1;CNTRL;CKAP5
Base Excision Repair R-HSA-73884	5/72	0.25662	0.641809	1.49909	2.03901	MBD4;H2BC26;PARP1;H2AC7;POT1
Interferon Alpha/Beta Signaling R-HSA-909733	5/72	0.25662	0.641809	1.49909	2.03901	BST2;IRF3;STAT1;ADAR;IRF5
Regulation Of RUNX2 Expression And Activity R-HSA-8939902	5/72	0.25662	0.641809	1.49909	2.03901	PSMD13;STAT1;PSMD2;PSME1;ESR1
Glycerophospholipid Biosynthesis R-HSA-1483206	8/127	0.256724	0.641809	1.35103	1.83707	PLA2G15;PTDSS1;MIGA1;PRKCSH;LIPH;PLA2R1;DGAT2L6;LPIN2
Mitotic G2-G2/M Phases R-HSA-453274	11/184	0.259376	0.647172	1.27824	1.72496	CEP57;LIN37;PPP2R1A;PSMD13;PSMD2;NDE1;CNTRL;PSME1;TUBGCP6;PPP2R3B;CKAP5
CTLA4 Inhibitory Signaling R-HSA-389513	2/21	0.263215	0.65165	2.11315	2.82059	PPP2R1A;CTLA4
Negative Regulation Of MET Activity R-HSA-6807004	2/21	0.263215	0.65165	2.11315	2.82059	PTPRJ;EPS15
PI-3K cascade:FGFR1 R-HSA-5654689	2/21	0.263215	0.65165	2.11315	2.82059	PIK3R1;FGFR1
ZBP1(DAI) Mediated Induction Of Type I IFNs R-HSA-1606322	2/21	0.263215	0.65165	2.11315	2.82059	IRF3;NFKB1
EPH-Ephrin Signaling R-HSA-2682334	6/91	0.263982	0.65219	1.41812	1.88876	APH1A;TIAM1;APH1B;LIMK1;PSEN1;AP2M1
Degradation Of DVL R-HSA-4641258	4/55	0.264457	0.65219	1.57518	2.09511	PSMD13;PSMD2;PSME1;KLHL12
Assembly Of ORC Complex At Origin Of Replication R-HSA-68616	3/38	0.269308	0.662113	1.72107	2.25787	H2BC26;H3C13;H2AC7
Telomere Maintenance R-HSA-157579	6/92	0.272124	0.662113	1.40156	1.82412	H2BC26;H2AC7;PPP6R3;ATRX;POLR2D;POT1
NoRC Negatively Regulates rRNA Expression R-HSA-427413	5/74	0.274896	0.662113	1.45549	1.87956	H2BC26;H3C13;ERCC3;SIN3A;H2AC7
Positive Epigenetic Regulation Of rRNA Expression R-HSA-5250913	5/74	0.274896	0.662113	1.45549	1.87956	H2BC26;H3C13;H2AC7;SF3B1;GATAD2B
RHOG GTPase Cycle R-HSA-9013408	5/74	0.274896	0.662113	1.45549	1.87956	OPHN1;PRKCSH;CDC42EP1;PIK3R1;RAB7A
E3 Ubiquitin Ligases Ubiquitinate Target Proteins R-HSA-8866654	4/56	0.2751	0.662113	1.5448	1.99375	SHPRH;VCP;CTR9;RTF1
Meiotic Recombination R-HSA-912446	4/56	0.2751	0.662113	1.5448	1.99375	H2BC26;H3C13;H2AC7;ATM
Stabilization Of P53 R-HSA-69541	4/56	0.2751	0.662113	1.5448	1.99375	PSMD13;PSMD2;PSME1;ATM
DNA Double-Strand Break Repair R-HSA-5693532	9/149	0.277558	0.662113	1.29186	1.65581	RAD52;UBE2I;H2BC26;PARP1;POLM;RAD17;ATM;TOPBP1;SPIDR
HIV Life Cycle R-HSA-162587	9/149	0.277558	0.662113	1.29186	1.65581	RNGTT;ERCC3;NUP50;NUP62;MVB12B;POLR2D;NUP43;TAF6;NUP58
VEGFA-VEGFR2 Pathway R-HSA-4420097	6/93	0.280327	0.662113	1.38537	1.76192	ABI1;ELMO1;CTNNB1;PIK3R1;WASF2;MAPK13
E2F Mediated Regulation Of DNA Replication R-HSA-113510	2/22	0.281127	0.662113	2.00738	2.54727	PPP2R1A;PPP2R3B
Response Of Mtb To Phagocytosis R-HSA-9637690	2/22	0.281127	0.662113	2.00738	2.54727	NANOS2;RAB7A
Transmission Across Chemical Synapses R-HSA-112315	14/246	0.281474	0.662113	1.21321	1.53801	NSF;GLS2;RASGRF1;SLC1A2;PRKX;ADCY1;CAMKK2;GABRR3;EPB41L1;DNAJC5;MAPT;PPFIA4;AP2M1;GRIA4
DAG And IP3 Signaling R-HSA-1489509	3/39	0.282386	0.662113	1.67318	2.1157	PRKX;ADCY1;CAMKK2
Nuclear Envelope (NE) Reassembly R-HSA-2995410	5/75	0.284134	0.662113	1.43462	1.80519	UBE2I;PPP2R1A;NUP62;NUP43;NUP58
Downstream TCR Signaling R-HSA-202424	6/94	0.288584	0.662113	1.36956	1.70205	PSMD13;PSMD2;PSME1;PRKCQ;PIK3R1;NFKB1
Activation Of NIMA Kinases NEK9, NEK6, NEK7 R-HSA-2980767	1/7	0.288733	0.662113	3.34457	4.1548	NEK9
Activation Of RAC1 Downstream Of NMDARs R-HSA-9619229	1/7	0.288733	0.662113	3.34457	4.1548	CAMKK2
Acyl Chain Remodeling Of DAG And TAG R-HSA-1482883	1/7	0.288733	0.662113	3.34457	4.1548	DGAT2L6
Constitutive Signaling By NOTCH1 t(7;9)(NOTCH1:M1580 K2555) Translocation Mutant R-HSA-2660826	1/7	0.288733	0.662113	3.34457	4.1548	ADAM17
DEx/H-box Helicases Activate Type I IFN And Inflammatory Cytokines Production R-HSA-3134963	1/7	0.288733	0.662113	3.34457	4.1548	NFKB1
Digestion Of Dietary Lipid R-HSA-192456	1/7	0.288733	0.662113	3.34457	4.1548	PNLIPRP1
Erythrocytes Take Up Oxygen And Release Carbon Dioxide R-HSA-1247673	1/7	0.288733	0.662113	3.34457	4.1548	MINDY4
GLI Proteins Bind Promoters Of Hh Responsive Genes To Promote Transcription R-HSA-5635851	1/7	0.288733	0.662113	3.34457	4.1548	GLI2
IkBA Variant Leads To EDA-ID R-HSA-5603029	1/7	0.288733	0.662113	3.34457	4.1548	NFKB1
Insulin-like Growth Factor-2 mRNA Binding Proteins (IGF2BPs/IMPs/VICKZs) Bind RNA R-HSA-428359	1/7	0.288733	0.662113	3.34457	4.1548	CD44
LTC4-CYSLTR Mediated IL4 Production R-HSA-9664535	1/7	0.288733	0.662113	3.34457	4.1548	GGT5
Loss Of Function Of SMAD2/3 In Cancer R-HSA-3304349	1/7	0.288733	0.662113	3.34457	4.1548	TGFBR2
Loss Of Function Of TGFBR1 In Cancer R-HSA-3656534	1/7	0.288733	0.662113	3.34457	4.1548	TGFBR2
Loss Of MECP2 Binding Ability To NCoR/SMRT Complex R-HSA-9022537	1/7	0.288733	0.662113	3.34457	4.1548	NCOR1
MECP2 Regulates Transcription Of Neuronal Ligands R-HSA-9022702	1/7	0.288733	0.662113	3.34457	4.1548	SIN3A
Nef Mediated CD8 Down-regulation R-HSA-182218	1/7	0.288733	0.662113	3.34457	4.1548	AP2M1
PP2A-mediated Dephosphorylation Of Key Metabolic Factors R-HSA-163767	1/7	0.288733	0.662113	3.34457	4.1548	PPP2R1A
RUNX1 Regulates Transcription Of Genes Involved In Differentiation Of Myeloid Cells R-HSA-8939246	1/7	0.288733	0.662113	3.34457	4.1548	RUNX1
RUNX3 Regulates CDKN1A Transcription R-HSA-8941855	1/7	0.288733	0.662113	3.34457	4.1548	ZFHX3
Signaling By MAPK Mutants R-HSA-9652817	1/7	0.288733	0.662113	3.34457	4.1548	DUSP10
TYSND1 Cleaves Peroxisomal Proteins R-HSA-9033500	1/7	0.288733	0.662113	3.34457	4.1548	AGPS
Wax And Plasmalogen Biosynthesis R-HSA-8848584	1/7	0.288733	0.662113	3.34457	4.1548	AGPS
Presynaptic Phase Of Homologous DNA Pairing And Strand Exchange R-HSA-5693616	3/40	0.295517	0.671173	1.62787	1.98442	RAD17;ATM;TOPBP1
RET Signaling R-HSA-8853659	3/40	0.295517	0.671173	1.62787	1.98442	DOK1;PIK3R1;GFRA2
Drug ADME R-HSA-9748784	6/95	0.296891	0.671173	1.3541	1.6444	GGT5;ABCC4;CYP2C9;CYP2C8;UGT2B28;CES2
HDR Thru Homologous Recombination (HRR) Or Single Strand Annealing (SSA) R-HSA-5693567	7/114	0.298096	0.671173	1.31417	1.59059	RAD52;UBE2I;H2BC26;RAD17;ATM;TOPBP1;SPIDR
Signaling By NTRK1 (TRKA) R-HSA-187037	7/114	0.298096	0.671173	1.31417	1.59059	PPP2R1A;TCF12;PIK3R1;MEF2D;AP2M1;CRKL;MAPK13
RHO GTPase Effectors R-HSA-195258	15/269	0.298446	0.671173	1.18717	1.43548	KDM4C;H2AC7;NDE1;LIMK1;CKAP5;H2BC26;FMNL2;DAAM1;H3C13;PPP2R1A;ABI1;CTNNB1;NUP43;BUB3;WASF2
IKK Complex Recruitment Mediated By RIP1 R-HSA-937041	2/23	0.299001	0.671173	1.91169	2.308	TMED7-TICAM2;BIRC3
Nucleotide Salvage R-HSA-8956321	2/23	0.299001	0.671173	1.91169	2.308	AMPD1;AMPD3
Post-chaperonin Tubulin Folding Pathway R-HSA-389977	2/23	0.299001	0.671173	1.91169	2.308	TBCE;TBCD
RHOBTB2 GTPase Cycle R-HSA-9013418	2/23	0.299001	0.671173	1.91169	2.308	DDX39B;SRRM1
Signaling By NTRK2 (TRKB) R-HSA-9006115	2/23	0.299001	0.671173	1.91169	2.308	TIAM1;PIK3R1
Telomere Extension By Telomerase R-HSA-171319	2/23	0.299001	0.671173	1.91169	2.308	PPP6R3;POT1
ABC Transporter Disorders R-HSA-5619084	5/77	0.302777	0.677264	1.39462	1.66624	VCP;OS9;PSMD13;PSMD2;PSME1
Negative Epigenetic Regulation Of rRNA Expression R-HSA-5250941	5/77	0.302777	0.677264	1.39462	1.66624	H2BC26;H3C13;ERCC3;SIN3A;H2AC7
Metabolism Of Steroids R-HSA-8957322	9/153	0.303519	0.677473	1.25571	1.4972	OSBPL9;STARD3;MBD4;STARD5;UBE2I;CHD9;CYP11B1;GC;LGMN
B-WICH Complex Positively Regulates rRNA Expression R-HSA-5250924	4/59	0.307406	0.677473	1.46031	1.72256	H2BC26;H3C13;H2AC7;SF3B1
Degradation Of GLI2 By Proteasome R-HSA-5610783	4/59	0.307406	0.677473	1.46031	1.72256	PSMD13;PSMD2;PSME1;GLI2
Defective Homologous Recombination Repair (HRR) Due To BRCA2 Loss Of Function R-HSA-9701190	3/41	0.308683	0.677473	1.58495	1.86302	RAD17;ATM;TOPBP1
Negative Regulation Of MAPK Pathway R-HSA-5675221	3/41	0.308683	0.677473	1.58495	1.86302	DUSP10;PPP2R1A;PTPN7
Regulation Of Beta-Cell Development R-HSA-186712	3/41	0.308683	0.677473	1.58495	1.86302	SNW1;PAX6;RBPJ
Constitutive Signaling By Aberrant PI3K In Cancer R-HSA-2219530	5/78	0.312168	0.677473	1.37544	1.60131	NRG3;PIK3R1;ICOS;ESR1;FGFR1
FCERI Mediated NF-kB Activation R-HSA-2871837	5/78	0.312168	0.677473	1.37544	1.60131	PSMD13;PSMD2;PSME1;PRKCQ;NFKB1
Oncogenic MAPK Signaling R-HSA-6802957	5/78	0.312168	0.677473	1.37544	1.60131	SPRED2;SPRED1;DUSP10;NF1;ZC3HAV1
Epigenetic Regulation Of Gene Expression R-HSA-212165	7/116	0.313351	0.677473	1.28992	1.49686	H2BC26;H3C13;ERCC3;H2AC7;SIN3A;SF3B1;GATAD2B
EML4 And NUDC In Mitotic Spindle Formation R-HSA-9648025	6/97	0.313639	0.677473	1.3242	1.53543	NEK9;PPP2R1A;NDE1;NUP43;BUB3;CKAP5
Growth Hormone Receptor Signaling R-HSA-982772	2/24	0.316801	0.677473	1.8247	2.09746	ADAM17;STAT1
MicroRNA (miRNA) Biogenesis R-HSA-203927	2/24	0.316801	0.677473	1.8247	2.09746	AGO1;POLR2D
Signaling By ERBB2 KD Mutants R-HSA-9664565	2/24	0.316801	0.677473	1.8247	2.09746	NRG3;PIK3R1
Signaling By Erythropoietin R-HSA-9006335	2/24	0.316801	0.677473	1.8247	2.09746	PIK3R1;CRKL
Downstream Signaling Events Of B Cell Receptor (BCR) R-HSA-1168372	5/79	0.321597	0.677473	1.35679	1.53921	PSMD13;PSMD2;PSME1;REL;NFKB1
Defective Pyroptosis R-HSA-9710421	3/42	0.321867	0.677473	1.54423	1.75056	H2BC26;H3C13;H2AC7
Intra-Golgi Traffic R-HSA-6811438	3/42	0.321867	0.677473	1.54423	1.75056	NSF;RAB30;STX16
PRC2 Methylates Histones And DNA R-HSA-212300	3/42	0.321867	0.677473	1.54423	1.75056	H2BC26;H3C13;H2AC7
Vasopressin Regulates Renal Water Homeostasis Via Aquaporins R-HSA-432040	3/42	0.321867	0.677473	1.54423	1.75056	MINDY4;ADCY1;AQP2
Binding Of TCF/LEF:CTNNB1 To Target Gene Promoters R-HSA-4411364	1/8	0.32253	0.677473	2.86663	3.24375	CTNNB1
CREB1 Phosphorylation Thru Activation Of CaMKII/CaMKK/CaMKIV Cascasde R-HSA-442729	1/8	0.32253	0.677473	2.86663	3.24375	CAMKK2
Fatty Acids Bound To GPR40 (FFAR1) Regulate Insulin Secretion R-HSA-434316	1/8	0.32253	0.677473	2.86663	3.24375	FFAR1
InlA-mediated Entry Of Listeria Monocytogenes Into Host Cells R-HSA-8876493	1/8	0.32253	0.677473	2.86663	3.24375	CTNNB1
Lectin Pathway Of Complement Activation R-HSA-166662	1/8	0.32253	0.677473	2.86663	3.24375	MASP1
Nef Mediated CD4 Down-regulation R-HSA-167590	1/8	0.32253	0.677473	2.86663	3.24375	AP2M1
Nef And Signal Transduction R-HSA-164944	1/8	0.32253	0.677473	2.86663	3.24375	ELMO1
Netrin Mediated Repulsion Signals R-HSA-418886	1/8	0.32253	0.677473	2.86663	3.24375	DCC
Orexin And Neuropeptides FF And QRFP Bind To Their Respective Receptors R-HSA-389397	1/8	0.32253	0.677473	2.86663	3.24375	CD200R1
POLB-Dependent Long Patch Base Excision Repair R-HSA-110362	1/8	0.32253	0.677473	2.86663	3.24375	PARP1
RUNX1 Regulates Transcription Of Genes Involved In Differentiation Of Keratinocytes R-HSA-8939242	1/8	0.32253	0.677473	2.86663	3.24375	RUNX1
RUNX3 Regulates WNT Signaling R-HSA-8951430	1/8	0.32253	0.677473	2.86663	3.24375	CTNNB1
Release Of Hh-Np From Secreting Cell R-HSA-5362798	1/8	0.32253	0.677473	2.86663	3.24375	ADAM17
Signaling By TGF-beta Receptor Complex In Cancer R-HSA-3304351	1/8	0.32253	0.677473	2.86663	3.24375	TGFBR2
Sodium/Proton Exchangers R-HSA-425986	1/8	0.32253	0.677473	2.86663	3.24375	SLC9A9
Synthesis Of PG R-HSA-1483148	1/8	0.32253	0.677473	2.86663	3.24375	PRKCSH
Transport Of Fatty Acids R-HSA-804914	1/8	0.32253	0.677473	2.86663	3.24375	SLC27A6
Ca2+ Pathway R-HSA-4086398	4/61	0.329153	0.687343	1.40892	1.56564	AGO1;CTNNB1;TNRC6A;TNRC6B
Dectin-1 Mediated Noncanonical NF-kB Signaling R-HSA-5607761	4/61	0.329153	0.687343	1.40892	1.56564	CCL22;PSMD13;PSMD2;PSME1
CLEC7A (Dectin-1) Signaling R-HSA-5607764	6/99	0.330532	0.687343	1.29559	1.43428	CASP8;CCL22;PSMD13;PSMD2;PSME1;NFKB1
Processing Of DNA Double-Strand Break Ends R-HSA-5693607	5/80	0.331058	0.687343	1.33862	1.4798	H2BC26;UBE2I;RAD17;ATM;TOPBP1
Cell Recruitment (Pro-Inflammatory Response) R-HSA-9664424	2/25	0.334493	0.687343	1.74528	1.91132	TXNIP;NFKB1
Cyclin A/B1/B2 Associated Events During G2/M Transition R-HSA-69273	2/25	0.334493	0.687343	1.74528	1.91132	PPP2R1A;PPP2R3B
Fertilization R-HSA-1187000	2/25	0.334493	0.687343	1.74528	1.91132	HVCN1;ZP2
Signaling By ERBB2 In Cancer R-HSA-1227990	2/25	0.334493	0.687343	1.74528	1.91132	NRG3;PIK3R1
Termination Of O-glycan Biosynthesis R-HSA-977068	2/25	0.334493	0.687343	1.74528	1.91132	ST6GAL1;ST3GAL4
Condensation Of Prophase Chromosomes R-HSA-2299718	3/43	0.335054	0.687343	1.50554	1.64626	H2BC26;H3C13;H2AC7
Homologous DNA Pairing And Strand Exchange R-HSA-5693579	3/43	0.335054	0.687343	1.50554	1.64626	RAD17;ATM;TOPBP1
RND2 GTPase Cycle R-HSA-9696270	3/43	0.335054	0.687343	1.50554	1.64626	PLXND1;FNBP1;PIK3R1
Voltage Gated Potassium Channels R-HSA-1296072	3/43	0.335054	0.687343	1.50554	1.64626	KCNV1;KCNS1;KCNQ2
RHO GTPases Activate Formins R-HSA-5663220	7/119	0.336486	0.687343	1.25517	1.36713	FMNL2;DAAM1;PPP2R1A;NDE1;NUP43;BUB3;CKAP5
KEAP1-NFE2L2 Pathway R-HSA-9755511	6/100	0.339022	0.687343	1.28173	1.38644	VCP;PSMD13;PSMD2;SESN1;TXNRD1;PSME1
RHO GTPases Activate PKNs R-HSA-5625740	4/62	0.340062	0.687343	1.38456	1.49342	H2BC26;KDM4C;H3C13;H2AC7
Regulation Of Actin Dynamics For Phagocytic Cup Formation R-HSA-2029482	4/62	0.340062	0.687343	1.38456	1.49342	LIMK1;ABI1;ELMO1;WASF2
TP53 Regulates Transcription Of DNA Repair Genes R-HSA-6796648	4/62	0.340062	0.687343	1.38456	1.49342	ERCC3;POLR2D;ATM;DDB2
Collagen Chain Trimerization R-HSA-8948216	3/44	0.348228	0.687343	1.46875	1.54938	COL1A1;COL6A1;COL4A6
Cytosolic Sensors Of Pathogen-Associated DNA R-HSA-1834949	4/63	0.350981	0.687343	1.36102	1.42502	AIM2;IRF3;CTNNB1;NFKB1
Peroxisomal Protein Import R-HSA-9033241	4/63	0.350981	0.687343	1.36102	1.42502	NANOS2;USP9X;AGPS;ACOX3
Synthesis Of Substrates In N-glycan Biosythesis R-HSA-446219	4/63	0.350981	0.687343	1.36102	1.42502	ST6GAL1;ST8SIA1;PMM2;ST3GAL4
Downregulation Of TGF-beta Receptor Signaling R-HSA-2173788	2/26	0.352048	0.687343	1.67247	1.74604	SMAD7;TGFBR2
Infection With Mycobacterium Tuberculosis R-HSA-9635486	2/26	0.352048	0.687343	1.67247	1.74604	NANOS2;RAB7A
Role Of Phospholipids In Phagocytosis R-HSA-2029485	2/26	0.352048	0.687343	1.67247	1.74604	PRKCSH;PIK3R1
Signaling By ALK R-HSA-201556	2/26	0.352048	0.687343	1.67247	1.74604	SIN3A;PIK3R1
TNFR1-induced NFkappaB Signaling Pathway R-HSA-5357956	2/26	0.352048	0.687343	1.67247	1.74604	CYLD;BIRC3
WNT Ligand Biogenesis And Trafficking R-HSA-3238698	2/26	0.352048	0.687343	1.67247	1.74604	WNT5B;WNT7B
Activation Of PUMA And Translocation To Mitochondria R-HSA-139915	1/9	0.354723	0.687343	2.50817	2.59951	TP53BP2
Adenylate Cyclase Activating Pathway R-HSA-170660	1/9	0.354723	0.687343	2.50817	2.59951	ADCY1
BH3-only Proteins Associate With And Inactivate Anti-Apoptotic BCL-2 Members R-HSA-111453	1/9	0.354723	0.687343	2.50817	2.59951	BMF
Beta-oxidation Of pristanoyl-CoA R-HSA-389887	1/9	0.354723	0.687343	2.50817	2.59951	ACOX3
CD163 Mediating An Anti-Inflammatory Response R-HSA-9662834	1/9	0.354723	0.687343	2.50817	2.59951	ADAM17
Displacement Of DNA Glycosylase By APEX1 R-HSA-110357	1/9	0.354723	0.687343	2.50817	2.59951	MBD4
Formation Of Annular Gap Junctions R-HSA-196025	1/9	0.354723	0.687343	2.50817	2.59951	AP2M1
GP1b-IX-V Activation Signaling R-HSA-430116	1/9	0.354723	0.687343	2.50817	2.59951	PIK3R1
Hydrolysis Of LPC R-HSA-1483115	1/9	0.354723	0.687343	2.50817	2.59951	PLA2G15
Interleukin-1 Processing R-HSA-448706	1/9	0.354723	0.687343	2.50817	2.59951	NFKB1
Interleukin-9 Signaling R-HSA-8985947	1/9	0.354723	0.687343	2.50817	2.59951	STAT1
MET Receptor Recycling R-HSA-8875656	1/9	0.354723	0.687343	2.50817	2.59951	CRKL
NR1H2 And NR1H3 Regulate Gene Expression To Control Bile Acid Homeostasis R-HSA-9623433	1/9	0.354723	0.687343	2.50817	2.59951	NCOR1
PI3K/AKT Activation R-HSA-198203	1/9	0.354723	0.687343	2.50817	2.59951	PIK3R1
PTK6 Regulates RTKs And Their Effectors AKT1 And DOK1 R-HSA-8849469	1/9	0.354723	0.687343	2.50817	2.59951	DOK1
Prevention Of Phagosomal-Lysosomal Fusion R-HSA-9636383	1/9	0.354723	0.687343	2.50817	2.59951	RAB7A
Processing And Activation Of SUMO R-HSA-3215018	1/9	0.354723	0.687343	2.50817	2.59951	UBE2I
Prostanoid Ligand Receptors R-HSA-391908	1/9	0.354723	0.687343	2.50817	2.59951	PTGFR
Regulation Of Commissural Axon Pathfinding By SLIT And ROBO R-HSA-428542	1/9	0.354723	0.687343	2.50817	2.59951	DCC
Small Interfering RNA (siRNA) Biogenesis R-HSA-426486	1/9	0.354723	0.687343	2.50817	2.59951	AGO1
Sperm Motility And Taxes R-HSA-1300642	1/9	0.354723	0.687343	2.50817	2.59951	HVCN1
TRAF6 Mediated IRF7 Activation In TLR7/8 Or 9 Signaling R-HSA-975110	1/9	0.354723	0.687343	2.50817	2.59951	TLR7
Transport Of Gamma-Carboxylated Protein Precursors From Endoplasmic Reticulum To Golgi Apparatus R-HSA-159763	1/9	0.354723	0.687343	2.50817	2.59951	GAS6
Rab Regulation Of Trafficking R-HSA-9007101	7/122	0.359839	0.696199	1.22223	1.24924	GGA2;DENND1B;GGA1;TRAPPC2L;RABEP1;RIN2;RAB7A
Interleukin-10 Signaling R-HSA-6783783	3/45	0.361374	0.698071	1.4337	1.45928	FCER2;CCL22;IL10RA
Semaphorin Interactions R-HSA-373755	4/64	0.361902	0.698071	1.33827	1.36019	NRP1;CD72;PLXND1;LIMK1
Neurotransmitter Receptors And Postsynaptic Signal Transmission R-HSA-112314	10/182	0.36451	0.702039	1.16762	1.17836	NSF;GABRR3;EPB41L1;RASGRF1;PRKX;MAPT;ADCY1;AP2M1;GRIA4;CAMKK2
FLT3 Signaling In Disease R-HSA-9682385	2/27	0.369438	0.708321	1.60549	1.5987	MYO18A;PIK3R1
Signaling By BMP R-HSA-201451	2/27	0.369438	0.708321	1.60549	1.5987	SMAD6;SMAD7
Role Of Nef In HIV-1 Replication And Disease Pathogenesis R-HSA-164952	2/27	0.369438	0.708321	1.60549	1.5987	ELMO1;AP2M1
p53-Dependent G1 DNA Damage Response R-HSA-69563	4/65	0.372817	0.711351	1.31626	1.29871	PSMD13;PSMD2;PSME1;ATM
Transport Of Inorganic Cations/Anions And Amino Acids/Oligopeptides R-HSA-425393	6/104	0.373166	0.711351	1.22916	1.21162	SLC9A9;SLC1A2;SLC1A4;SLC1A5;SLC15A3;SLC38A4
HIV Transcription Initiation R-HSA-167161	3/46	0.374478	0.711351	1.40028	1.37539	ERCC3;POLR2D;TAF6
RNA Polymerase I Transcription Initiation R-HSA-73762	3/46	0.374478	0.711351	1.40028	1.37539	RRN3;ERCC3;GATAD2B
PI3K/AKT Signaling In Cancer R-HSA-2219528	6/105	0.381727	0.711351	1.21668	1.17172	NRG3;PIK3R1;FOXO3;ICOS;ESR1;FGFR1
Integrin Cell Surface Interactions R-HSA-216083	4/66	0.383716	0.711351	1.29496	1.24038	CXXC1;CD47;ITGA5;CD44
Cell Cycle R-HSA-1640170	33/654	0.384918	0.711351	1.06796	1.01961	CEP57;LIN37;NUMA1;PSMD13;SYNE1;H2BC26;H3C13;PPP2R1A;PSMD2;PPP6R3;POLR2D;CNTRL;NUP62;NUP43;TOPBP1;BUB3;NEK9;UBE2I;H2AC7;NDE1;ATRX;PPP2R3B;CKAP5;MAU2;STAG3;NUP50;PSME1;RAD17;POT1;TUBGCP6;ATM;LPIN2;NUP58
AKT Phosphorylates Targets In Nucleus R-HSA-198693	1/10	0.385387	0.711351	2.22936	2.12571	FOXO3
CaMK IV-mediated Phosphorylation Of CREB R-HSA-111932	1/10	0.385387	0.711351	2.22936	2.12571	CAMKK2
Caspase Activation Via Dependence Receptors In Absence Of Ligand R-HSA-418889	1/10	0.385387	0.711351	2.22936	2.12571	DCC
Cohesin Loading Onto Chromatin R-HSA-2470946	1/10	0.385387	0.711351	2.22936	2.12571	MAU2
Creatine Metabolism R-HSA-71288	1/10	0.385387	0.711351	2.22936	2.12571	GATM
Crosslinking Of Collagen Fibrils R-HSA-2243919	1/10	0.385387	0.711351	2.22936	2.12571	LOXL3
Gamma-carboxylation Of Protein Precursors R-HSA-159740	1/10	0.385387	0.711351	2.22936	2.12571	GAS6
Gap Junction Degradation R-HSA-190873	1/10	0.385387	0.711351	2.22936	2.12571	AP2M1
Glucocorticoid Biosynthesis R-HSA-194002	1/10	0.385387	0.711351	2.22936	2.12571	CYP11B1
Interaction With Cumulus Cells And Zona Pellucida R-HSA-2534343	1/10	0.385387	0.711351	2.22936	2.12571	ZP2
Interleukin-21 Signaling R-HSA-9020958	1/10	0.385387	0.711351	2.22936	2.12571	STAT1
MASTL Facilitates Mitotic Progression R-HSA-2465910	1/10	0.385387	0.711351	2.22936	2.12571	PPP2R1A
Reactions Specific To Complex N-glycan Synthesis Pathway R-HSA-975578	1/10	0.385387	0.711351	2.22936	2.12571	FUCA1
Removal Of Aminoterminal Propeptides From Gamma-Carboxylated Proteins R-HSA-159782	1/10	0.385387	0.711351	2.22936	2.12571	GAS6
Role Of Second Messengers In Netrin-1 Signaling R-HSA-418890	1/10	0.385387	0.711351	2.22936	2.12571	DCC
STAT3 Nuclear Events Downstream Of ALK Signaling R-HSA-9701898	1/10	0.385387	0.711351	2.22936	2.12571	SIN3A
Signaling By FGFR4 In Disease R-HSA-5655291	1/10	0.385387	0.711351	2.22936	2.12571	PIK3R1
Uptake Of Dietary Cobalamins Into Enterocytes R-HSA-9758881	1/10	0.385387	0.711351	2.22936	2.12571	CBLIF
Interconversion Of Nucleotide Di- And Triphosphates R-HSA-499943	2/28	0.38664	0.711351	1.54365	1.46687	RRM2B;TXNRD1
Molecules Associated With Elastic Fibres R-HSA-2129379	2/28	0.38664	0.711351	1.54365	1.46687	MFAP4;FBLN5
Paracetamol ADME R-HSA-9753281	2/28	0.38664	0.711351	1.54365	1.46687	GGT5;ABCC4
PLC Beta Mediated Events R-HSA-112043	3/47	0.387529	0.711958	1.36839	1.29718	PRKX;ADCY1;CAMKK2
Transport Of Bile Salts And Organic Acids, Metal Ions And Amine Compounds R-HSA-425366	5/86	0.38815	0.712074	1.23908	1.17262	SLC22A18;SLC39A1;SLC39A14;SLC39A3;RUNX1
Mitotic Prometaphase R-HSA-68877	10/186	0.390166	0.714743	1.14084	1.07374	CEP57;NEK9;NUMA1;PPP2R1A;NDE1;CNTRL;TUBGCP6;NUP43;BUB3;CKAP5
SLC-mediated Transmembrane Transport R-HSA-425407	13/247	0.392466	0.717925	1.11562	1.04344	SLC33A1;SLC1A2;SLC1A4;SLC1A5;SLC39A14;RUNX1;SLC22A18;SLC9A9;SLC27A6;SLC15A3;SLC39A1;SLC39A3;SLC38A4
G1/S DNA Damage Checkpoints R-HSA-69615	4/67	0.394593	0.719751	1.27434	1.18501	PSMD13;PSMD2;PSME1;ATM
HDR Thru Homologous Recombination (HRR) R-HSA-5685942	4/67	0.394593	0.719751	1.27434	1.18501	RAD17;ATM;TOPBP1;SPIDR
Regulation Of PLK1 Activity At G2/M Transition R-HSA-2565942	5/87	0.397665	0.724319	1.2239	1.12861	CEP57;PPP2R1A;NDE1;CNTRL;CKAP5
MyD88-independent TLR4 Cascade R-HSA-166166	6/107	0.39885	0.72544	1.19246	1.09608	CASP8;IRF3;PPP2R1A;TMED7-TICAM2;NFKB1;BIRC3
Cross-presentation Of Soluble Exogenous Antigens (Endosomes) R-HSA-1236978	3/48	0.400512	0.726391	1.33791	1.2242	PSMD13;PSMD2;PSME1
DNA Damage Bypass R-HSA-73893	3/48	0.400512	0.726391	1.33791	1.2242	DDB1;VCP;UBA7
Disassembly Of Destruction Complex And Recruitment Of AXIN To Membrane R-HSA-4641262	2/29	0.403633	0.72894	1.4864	1.34854	PPP2R1A;CTNNB1
HSF1 Activation R-HSA-3371511	2/29	0.403633	0.72894	1.4864	1.34854	VCP;COL4A6
PIWI-interacting RNA (piRNA) Biogenesis R-HSA-5601884	2/29	0.403633	0.72894	1.4864	1.34854	PIWIL4;POLR2D
Regulation Of mRNA Stability By Proteins That Bind AU-rich Elements R-HSA-450531	5/88	0.407165	0.729117	1.20909	1.08641	PSMD13;PSMD2;PSME1;HNRNPD;DCP1A
Extracellular Matrix Organization R-HSA-1474244	15/291	0.41009	0.729117	1.09126	0.972723	PTPRS;MMP1;LOXL3;CXXC1;LRP4;PSEN1;FBLN5;COL1A1;MFAP4;ADAM17;COL6A1;COL4A6;CD47;ITGA5;CD44
Netrin-1 Signaling R-HSA-373752	3/49	0.413417	0.729117	1.30876	1.15602	DCC;PRKCQ;MAPK13
Regulation Of Activated PAK-2p34 By Proteasome Mediated Degradation R-HSA-211733	3/49	0.413417	0.729117	1.30876	1.15602	PSMD13;PSMD2;PSME1
Apoptotic Cleavage Of Cell Adhesion Proteins R-HSA-351906	1/11	0.414596	0.729117	2.00632	1.76647	CTNNB1
Aspartate And Asparagine Metabolism R-HSA-8963693	1/11	0.414596	0.729117	2.00632	1.76647	SLC25A12
Carnitine Metabolism R-HSA-200425	1/11	0.414596	0.729117	2.00632	1.76647	PPARD
Ethanol Oxidation R-HSA-71384	1/11	0.414596	0.729117	2.00632	1.76647	ACSS1
Free Fatty Acids Regulate Insulin Secretion R-HSA-400451	1/11	0.414596	0.729117	2.00632	1.76647	FFAR1
Gamma-carboxylation, Transport, And Amino-Terminal Cleavage Of Proteins R-HSA-159854	1/11	0.414596	0.729117	2.00632	1.76647	GAS6
Interleukin-27 Signaling R-HSA-9020956	1/11	0.414596	0.729117	2.00632	1.76647	STAT1
Interleukin-6 Signaling R-HSA-1059683	1/11	0.414596	0.729117	2.00632	1.76647	STAT1
MET Activates RAP1 And RAC1 R-HSA-8875555	1/11	0.414596	0.729117	2.00632	1.76647	CRKL
Mucopolysaccharidoses R-HSA-2206281	1/11	0.414596	0.729117	2.00632	1.76647	SGSH
RHO GTPases Activate IQGAPs R-HSA-5626467	1/11	0.414596	0.729117	2.00632	1.76647	CTNNB1
SARS-CoV-2 Modulates Autophagy R-HSA-9754560	1/11	0.414596	0.729117	2.00632	1.76647	VPS39
SUMOylation Of Immune Response Proteins R-HSA-4755510	1/11	0.414596	0.729117	2.00632	1.76647	UBE2I
Signaling By Activated Point Mutants Of FGFR1 R-HSA-1839122	1/11	0.414596	0.729117	2.00632	1.76647	FGFR1
WNT5A-dependent Internalization Of FZD2, FZD5 And ROR2 R-HSA-5140745	1/11	0.414596	0.729117	2.00632	1.76647	AP2M1
Transcription Of HIV Genome R-HSA-167172	4/69	0.416247	0.730706	1.235	1.08244	RNGTT;ERCC3;POLR2D;TAF6
ER-Phagosome Pathway R-HSA-1236974	5/89	0.416646	0.730706	1.19463	1.04592	SEC61A1;PSMD13;PSMD2;PSME1;TAPBP
Axon Guidance R-HSA-422475	26/519	0.418341	0.732671	1.05916	0.923016	NRP1;NRP2;PLXND1;PSMD13;PIK3R1;PSEN1;APH1A;APH1B;PSMD2;AP2M1;CD72;DCC;LIMK1;ANK2;ANK1;GFRA2;MAPK13;TIAM1;DOK1;KCNQ2;COL6A1;PSME1;DCX;PRKCQ;ITGA5;FGFR1
Activation Of BH3-only Proteins R-HSA-114452	2/30	0.420397	0.73325	1.43324	1.24199	TP53BP2;BMF
Downstream Signaling Of Activated FGFR1 R-HSA-5654687	2/30	0.420397	0.73325	1.43324	1.24199	PIK3R1;FGFR1
Synthesis Of Active Ubiquitin: Roles Of E1 And E2 Enzymes R-HSA-8866652	2/30	0.420397	0.73325	1.43324	1.24199	USP9X;UBE2Z
Fc Epsilon Receptor (FCERI) Signaling R-HSA-2454202	7/130	0.422509	0.735928	1.14225	0.984103	PSMD13;PSMD2;PSME1;PRKCQ;PIK3R1;MS4A2;NFKB1
Assembly Of Pre-Replicative Complex R-HSA-68867	6/110	0.424475	0.738343	1.15788	0.99219	H2BC26;H3C13;H2AC7;PSMD13;PSMD2;PSME1
Regulation Of Ornithine Decarboxylase (ODC) R-HSA-350562	3/50	0.426232	0.740389	1.28084	1.09227	PSMD13;PSMD2;PSME1
Fatty Acid Metabolism R-HSA-8978868	9/173	0.438605	0.743192	1.10141	0.907733	GGT5;CYP2C9;CYP2C8;CYP2U1;PPT1;ACOX3;ALOX15B;PPARD;PTGS1
Nervous System Development R-HSA-9675108	27/545	0.438907	0.743192	1.04654	0.861789	NRP1;NRP2;PLXND1;PSMD13;PIK3R1;PSEN1;APH1A;APH1B;PSMD2;AP2M1;CD72;DCC;LIMK1;ANK2;ANK1;GFRA2;SMARCA4;MAPK13;TIAM1;DOK1;KCNQ2;COL6A1;PSME1;DCX;PRKCQ;ITGA5;FGFR1
Diseases Of DNA Repair R-HSA-9675135	3/51	0.438947	0.743192	1.25409	1.03259	RAD17;ATM;TOPBP1
GSK3B And BTRC:CUL1-mediated-degradation Of NFE2L2 R-HSA-9762114	3/51	0.438947	0.743192	1.25409	1.03259	PSMD13;PSMD2;PSME1
Nonhomologous End-Joining (NHEJ) R-HSA-5693571	3/51	0.438947	0.743192	1.25409	1.03259	H2BC26;POLM;ATM
Translocation Of SLC2A4 (GLUT4) To Plasma Membrane R-HSA-1445148	3/51	0.438947	0.743192	1.25409	1.03259	TBC1D4;EXOC7;EXOC4
Ubiquitin Mediated Degradation Of Phosphorylated Cdc25A R-HSA-69601	3/51	0.438947	0.743192	1.25409	1.03259	PSMD13;PSMD2;PSME1
Ubiquitin-dependent Degradation Of Cyclin D R-HSA-75815	3/51	0.438947	0.743192	1.25409	1.03259	PSMD13;PSMD2;PSME1
Vpu Mediated Degradation Of CD4 R-HSA-180534	3/51	0.438947	0.743192	1.25409	1.03259	PSMD13;PSMD2;PSME1
Activation Of TFAP2 (AP-2) Family Of Transcription Factors R-HSA-8866907	1/12	0.442418	0.743192	1.82383	1.48734	TFAP2A
Erythropoietin Activates Phosphoinositide-3-kinase (PI3K) R-HSA-9027276	1/12	0.442418	0.743192	1.82383	1.48734	PIK3R1
FGFR1c Ligand Binding And Activation R-HSA-190373	1/12	0.442418	0.743192	1.82383	1.48734	FGFR1
Frs2-mediated Activation R-HSA-170968	1/12	0.442418	0.743192	1.82383	1.48734	CRKL
Glutathione Synthesis And Recycling R-HSA-174403	1/12	0.442418	0.743192	1.82383	1.48734	GGT5
Hyaluronan Uptake And Degradation R-HSA-2160916	1/12	0.442418	0.743192	1.82383	1.48734	CD44
Interleukin-35 Signaling R-HSA-8984722	1/12	0.442418	0.743192	1.82383	1.48734	STAT1
Maturation Of Nucleoprotein R-HSA-9683610	1/12	0.442418	0.743192	1.82383	1.48734	UBE2I
Miscellaneous Substrates R-HSA-211958	1/12	0.442418	0.743192	1.82383	1.48734	CYP2U1
Pregnenolone Biosynthesis R-HSA-196108	1/12	0.442418	0.743192	1.82383	1.48734	STARD3
Regulation Of Glycolysis By Fructose 2,6-Bisphosphate Metabolism R-HSA-9634600	1/12	0.442418	0.743192	1.82383	1.48734	PPP2R1A
Regulation Of Localization Of FOXO Transcription Factors R-HSA-9614399	1/12	0.442418	0.743192	1.82383	1.48734	FOXO3
TICAM1-dependent Activation Of IRF3/IRF7 R-HSA-9013973	1/12	0.442418	0.743192	1.82383	1.48734	IRF3
TP53 Regulates Transcription Of Death Receptors And Ligands R-HSA-6803211	1/12	0.442418	0.743192	1.82383	1.48734	TP53BP2
Telomere C-strand Synthesis Initiation R-HSA-174430	1/12	0.442418	0.743192	1.82383	1.48734	POT1
p38MAPK Events R-HSA-171007	1/12	0.442418	0.743192	1.82383	1.48734	MAPK13
Cdc20:Phospho-APC/C Mediated Degradation Of Cyclin A R-HSA-174184	4/72	0.448375	0.752208	1.18033	0.946769	PSMD13;PSMD2;PSME1;BUB3
G-protein Mediated Events R-HSA-112040	3/52	0.451554	0.754326	1.22843	0.976679	PRKX;ADCY1;CAMKK2
Regulation Of Apoptosis R-HSA-169911	3/52	0.451554	0.754326	1.22843	0.976679	PSMD13;PSMD2;PSME1
Neddylation R-HSA-8951664	12/237	0.452325	0.754326	1.07036	0.849178	DDB1;KLHL9;VCP;PSMD13;PSMD2;FBXO4;PSME1;ASB13;ASB7;COPS7A;PUM2;DDB2
Thrombin Signaling Thru Proteinase Activated Receptors (PARs) R-HSA-456926	2/32	0.453174	0.754326	1.33755	1.05864	GNA12;F2R
Unattached Kinetochores Signal Amplification Via A MAD2 Inhibitory Signal R-HSA-141444	5/93	0.45427	0.754326	1.14009	0.899606	PPP2R1A;NDE1;NUP43;BUB3;CKAP5
SARS-CoV-2-host Interactions R-HSA-9705683	10/196	0.454512	0.754326	1.07893	0.85077	IRF3;STAT1;NUP50;NUP62;TLR7;NUP43;MASP1;ATG14;VPS39;NUP58
Interleukin-1 Signaling R-HSA-9020702	6/114	0.458375	0.754326	1.11476	0.869588	MAP3K3;CASP8;PSMD13;PSMD2;PSME1;NFKB1
APC:Cdc20 Mediated Degradation Of Cell Cycle Proteins Before Cycle Checkpoint Satisfied R-HSA-179419	4/73	0.458964	0.754326	1.16316	0.905849	PSMD13;PSMD2;PSME1;BUB3
Cellular Response To Hypoxia R-HSA-1234174	4/73	0.458964	0.754326	1.16316	0.905849	PSMD13;PSMD2;PSME1;HIF1AN
Extra-nuclear Estrogen Signaling R-HSA-9009391	4/73	0.458964	0.754326	1.16316	0.905849	ZDHHC7;PIK3R1;FOXO3;ESR1
Biological Oxidations R-HSA-211859	11/218	0.462559	0.754326	1.06637	0.82215	GGT5;CYP2C9;CYP2C8;CYP2B6;CYP2U1;CYP11B1;UGT2B28;ACSS1;CES2;GSTM5;PTGS1
Negative Regulation Of NOTCH4 Signaling R-HSA-9604323	3/53	0.464042	0.754326	1.2038	0.924255	PSMD13;PSMD2;PSME1
Vif-mediated Degradation Of APOBEC3G R-HSA-180585	3/53	0.464042	0.754326	1.2038	0.924255	PSMD13;PSMD2;PSME1
Adenylate Cyclase Inhibitory Pathway R-HSA-170670	1/13	0.468919	0.754326	1.67176	1.26607	ADCY1
Advanced Glycosylation Endproduct Receptor Signaling R-HSA-879415	1/13	0.468919	0.754326	1.67176	1.26607	PRKCSH
Apoptosis Induced DNA Fragmentation R-HSA-140342	1/13	0.468919	0.754326	1.67176	1.26607	H1-5
Defects In Cobalamin (B12) Metabolism R-HSA-3296469	1/13	0.468919	0.754326	1.67176	1.26607	CBLIF
ERBB2 Activates PTK6 Signaling R-HSA-8847993	1/13	0.468919	0.754326	1.67176	1.26607	NRG3
ERKs Are Inactivated R-HSA-202670	1/13	0.468919	0.754326	1.67176	1.26607	PPP2R1A
Erythropoietin Activates RAS R-HSA-9027284	1/13	0.468919	0.754326	1.67176	1.26607	CRKL
Glutamate And Glutamine Metabolism R-HSA-8964539	1/13	0.468919	0.754326	1.67176	1.26607	GLS2
IRF3-mediated Induction Of Type I IFN R-HSA-3270619	1/13	0.468919	0.754326	1.67176	1.26607	IRF3
Mitotic Telophase/Cytokinesis R-HSA-68884	1/13	0.468919	0.754326	1.67176	1.26607	MAU2
NF-kB Is Activated And Signals Survival R-HSA-209560	1/13	0.468919	0.754326	1.67176	1.26607	NFKB1
PTK6 Regulates RHO GTPases, RAS GTPase And MAP Kinases R-HSA-8849471	1/13	0.468919	0.754326	1.67176	1.26607	ELMO1
SHC1 Events In ERBB4 Signaling R-HSA-1250347	1/13	0.468919	0.754326	1.67176	1.26607	NRG3
Signal Regulatory Protein Family Interactions R-HSA-391160	1/13	0.468919	0.754326	1.67176	1.26607	CD47
Synthesis Of PE R-HSA-1483213	1/13	0.468919	0.754326	1.67176	1.26607	LPIN2
Formation Of Early Elongation Complex R-HSA-113418	2/33	0.469161	0.754326	1.29434	0.979566	ERCC3;POLR2D
Negative Regulation Of FGFR1 Signaling R-HSA-5654726	2/33	0.469161	0.754326	1.29434	0.979566	PPP2R1A;FGFR1
Resolution Of D-loop Structures Thru Holliday Junction Intermediates R-HSA-5693568	2/33	0.469161	0.754326	1.29434	0.979566	ATM;SPIDR
Signaling By WNT In Cancer R-HSA-4791275	2/33	0.469161	0.754326	1.29434	0.979566	PPP2R1A;CTNNB1
Signaling To ERKs R-HSA-187687	2/33	0.469161	0.754326	1.29434	0.979566	CRKL;MAPK13
Degradation Of AXIN R-HSA-4641257	3/54	0.476404	0.762126	1.18014	0.875058	PSMD13;PSMD2;PSME1
FBXL7 Down-Regulates AURKA During Mitotic Entry And In Early Mitosis R-HSA-8854050	3/54	0.476404	0.762126	1.18014	0.875058	PSMD13;PSMD2;PSME1
Regulation Of RUNX3 Expression And Activity R-HSA-8941858	3/54	0.476404	0.762126	1.18014	0.875058	PSMD13;PSMD2;PSME1
SCF-beta-TrCP Mediated Degradation Of Emi1 R-HSA-174113	3/54	0.476404	0.762126	1.18014	0.875058	PSMD13;PSMD2;PSME1
APC/C:Cdc20 Mediated Degradation Of Mitotic Proteins R-HSA-176409	4/75	0.479924	0.76556	1.13027	0.829765	PSMD13;PSMD2;PSME1;BUB3
MyD88 Cascade Initiated On Plasma Membrane R-HSA-975871	5/96	0.482046	0.76556	1.10233	0.804388	CASP8;PPP2R1A;TLR10;TLR5;NFKB1
Detoxification Of Reactive Oxygen Species R-HSA-3299685	2/34	0.484865	0.76556	1.25382	0.907625	TXNRD1;SOD3
EPHB-mediated Forward Signaling R-HSA-3928662	2/34	0.484865	0.76556	1.25382	0.907625	TIAM1;LIMK1
Metabolic Disorders Of Biological Oxidation Enzymes R-HSA-5579029	2/34	0.484865	0.76556	1.25382	0.907625	CYP2U1;CYP11B1
Resolution Of D-Loop Structures R-HSA-5693537	2/34	0.484865	0.76556	1.25382	0.907625	ATM;SPIDR
Transcriptional Regulation By E2F6 R-HSA-8953750	2/34	0.484865	0.76556	1.25382	0.907625	EPC1;PHC3
Metabolism Of Carbohydrates R-HSA-71387	14/285	0.487643	0.76556	1.03647	0.744362	MANBA;PHKA2;SGSH;PKM;CHST11;PPP2R1A;NUP50;NUP62;ST3GAL4;MAN2B1;NUP43;SLC25A12;CD44;NUP58
Golgi Associated Vesicle Biogenesis R-HSA-432722	3/55	0.488631	0.76556	1.15738	0.828854	TPD52;TGOLN2;DNAJC6
Intrinsic Pathway For Apoptosis R-HSA-109606	3/55	0.488631	0.76556	1.15738	0.828854	CASP8;TP53BP2;BMF
Activation Of APC/C And APC/C:Cdc20 Mediated Degradation Of Mitotic Proteins R-HSA-176814	4/76	0.490285	0.76556	1.11452	0.794393	PSMD13;PSMD2;PSME1;BUB3
Chromosome Maintenance R-HSA-73886	6/118	0.491768	0.76556	1.07472	0.762782	H2BC26;H2AC7;PPP6R3;ATRX;POLR2D;POT1
APC Truncation Mutants Have Impaired AXIN Binding R-HSA-5467337	1/14	0.494162	0.76556	1.54308	1.08771	PPP2R1A
Constitutive Signaling By EGFRvIII R-HSA-5637810	1/14	0.494162	0.76556	1.54308	1.08771	PIK3R1
Creation Of C4 And C2 Activators R-HSA-166786	1/14	0.494162	0.76556	1.54308	1.08771	MASP1
DCC Mediated Attractive Signaling R-HSA-418885	1/14	0.494162	0.76556	1.54308	1.08771	DCC
Glycogen Breakdown (Glycogenolysis) R-HSA-70221	1/14	0.494162	0.76556	1.54308	1.08771	PHKA2
LGI-ADAM Interactions R-HSA-5682910	1/14	0.494162	0.76556	1.54308	1.08771	ADAM23
Prolonged ERK Activation Events R-HSA-169893	1/14	0.494162	0.76556	1.54308	1.08771	CRKL
Regulation Of TP53 Activity Thru Association With Co-factors R-HSA-6804759	1/14	0.494162	0.76556	1.54308	1.08771	TP53BP2
Repression Of WNT Target Genes R-HSA-4641265	1/14	0.494162	0.76556	1.54308	1.08771	TLE3
Retrograde Neurotrophin Signaling R-HSA-177504	1/14	0.494162	0.76556	1.54308	1.08771	AP2M1
Role Of LAT2/NTAL/LAB On Calcium Mobilization R-HSA-2730905	1/14	0.494162	0.76556	1.54308	1.08771	PIK3R1
SEMA3A-Plexin Repulsion Signaling By Inhibiting Integrin Adhesion R-HSA-399955	1/14	0.494162	0.76556	1.54308	1.08771	NRP1
Synthesis Of IP2, IP, And Ins In Cytosol R-HSA-1855183	1/14	0.494162	0.76556	1.54308	1.08771	MTMR9
Triglyceride Biosynthesis R-HSA-75109	1/14	0.494162	0.76556	1.54308	1.08771	LPIN2
Metabolism Of Steroid Hormones R-HSA-196071	2/35	0.500276	0.767378	1.21577	0.842034	STARD3;CYP11B1
Plasma Lipoprotein Clearance R-HSA-8964043	2/35	0.500276	0.767378	1.21577	0.842034	NCEH1;AP2M1
Hedgehog Off State R-HSA-5610787	5/98	0.500292	0.767378	1.07851	0.746938	PSMD13;PSMD2;PSME1;ADCY1;GLI2
Biosynthesis Of N-glycan Precursor (Dolichol LLO) And Transfer To Protein R-HSA-446193	4/77	0.500559	0.767378	1.09919	0.760673	ST6GAL1;ST8SIA1;PMM2;ST3GAL4
G2/M DNA Damage Checkpoint R-HSA-69473	4/77	0.500559	0.767378	1.09919	0.760673	H2BC26;RAD17;ATM;TOPBP1
Chemokine Receptors Bind Chemokines R-HSA-380108	3/56	0.500718	0.767378	1.13548	0.785427	CCL22;CCR6;CXCL16
COPI-dependent Golgi-to-ER Retrograde Traffic R-HSA-6811434	4/78	0.510742	0.767378	1.08428	0.728517	NSF;KIF5C;UBE2Z;COPE
G Alpha (12/13) Signaling Events R-HSA-416482	4/78	0.510742	0.767378	1.08428	0.728517	AKAP13;TIAM1;GNA12;ARHGEF1
Nuclear Events Mediated By NFE2L2 R-HSA-9759194	4/78	0.510742	0.767378	1.08428	0.728517	PSMD13;PSMD2;TXNRD1;PSME1
Assembly Of Collagen Fibrils And Other Multimeric Structures R-HSA-2022090	3/57	0.512657	0.767378	1.1144	0.744582	COL1A1;COL6A1;LOXL3
NCAM Signaling For Neurite Out-Growth R-HSA-375165	3/57	0.512657	0.767378	1.1144	0.744582	COL6A1;GFRA2;FGFR1
NRAGE Signals Death Thru JNK R-HSA-193648	3/57	0.512657	0.767378	1.1144	0.744582	AKAP13;TIAM1;ARHGEF1
Regulated Necrosis R-HSA-5218859	3/57	0.512657	0.767378	1.1144	0.744582	CASP8;CFLAR;BIRC3
Glutathione Conjugation R-HSA-156590	2/36	0.515387	0.767378	1.17995	0.782112	GGT5;GSTM5
RHO GTPases Activate WASPs And WAVEs R-HSA-5663213	2/36	0.515387	0.767378	1.17995	0.782112	ABI1;WASF2
ROS And RNS Production In Phagocytes R-HSA-1222556	2/36	0.515387	0.767378	1.17995	0.782112	NANOS2;HVCN1
Regulation Of TP53 Degradation R-HSA-6804757	2/36	0.515387	0.767378	1.17995	0.782112	PPP2R1A;ATM
Constitutive Signaling By NOTCH1 HD Domain Mutants R-HSA-2691232	1/15	0.518206	0.767378	1.43279	0.941889	ADAM17
Depolymerisation Of Nuclear Lamina R-HSA-4419969	1/15	0.518206	0.767378	1.43279	0.941889	LPIN2
Diseases Associated With Glycosylation Precursor Biosynthesis R-HSA-5609975	1/15	0.518206	0.767378	1.43279	0.941889	PMM2
ERBB2 Regulates Cell Motility R-HSA-6785631	1/15	0.518206	0.767378	1.43279	0.941889	NRG3
Eicosanoid Ligand-Binding Receptors R-HSA-391903	1/15	0.518206	0.767378	1.43279	0.941889	PTGFR
Fatty Acids R-HSA-211935	1/15	0.518206	0.767378	1.43279	0.941889	CYP2B6
GRB2 Events In ERBB2 Signaling R-HSA-1963640	1/15	0.518206	0.767378	1.43279	0.941889	NRG3
IRAK2 Mediated Activation Of TAK1 Complex Upon TLR7/8 Or 9 Stimulation R-HSA-975163	1/15	0.518206	0.767378	1.43279	0.941889	TMED7-TICAM2
InlB-mediated Entry Of Listeria Monocytogenes Into Host Cell R-HSA-8875360	1/15	0.518206	0.767378	1.43279	0.941889	EPS15
Membrane Binding And Targetting Of GAG Proteins R-HSA-174490	1/15	0.518206	0.767378	1.43279	0.941889	MVB12B
Negative Regulation Of FLT3 R-HSA-9706369	1/15	0.518206	0.767378	1.43279	0.941889	PTPRJ
Negative Regulation Of TCF-dependent Signaling By WNT Ligand Antagonists R-HSA-3772470	1/15	0.518206	0.767378	1.43279	0.941889	SFRP1
Regulation Of Innate Immune Responses To Cytosolic DNA R-HSA-3134975	1/15	0.518206	0.767378	1.43279	0.941889	IRF3
Response Of EIF2AK1 (HRI) To Heme Deficiency R-HSA-9648895	1/15	0.518206	0.767378	1.43279	0.941889	EIF2AK1
Signaling By ERBB2 ECD Mutants R-HSA-9665348	1/15	0.518206	0.767378	1.43279	0.941889	PIK3R1
Signaling By FLT3 ITD And TKD Mutants R-HSA-9703648	1/15	0.518206	0.767378	1.43279	0.941889	PIK3R1
Synthesis Of Prostaglandins (PG) And Thromboxanes (TX) R-HSA-2162123	1/15	0.518206	0.767378	1.43279	0.941889	PTGS1
TRAF3-dependent IRF Activation Pathway R-HSA-918233	1/15	0.518206	0.767378	1.43279	0.941889	IRF3
WNT5A-dependent Internalization Of FZD4 R-HSA-5099900	1/15	0.518206	0.767378	1.43279	0.941889	AP2M1
YAP1- And WWTR1 (TAZ)-stimulated Gene Expression R-HSA-2032785	1/15	0.518206	0.767378	1.43279	0.941889	TBX5
mRNA Decay By 5 To 3 Exoribonuclease R-HSA-430039	1/15	0.518206	0.767378	1.43279	0.941889	DCP1A
Metabolism Of Polyamines R-HSA-351202	3/58	0.524443	0.769992	1.09408	0.706138	PSMD13;PSMD2;PSME1
NIK To Noncanonical NF-kB Signaling R-HSA-5676590	3/58	0.524443	0.769992	1.09408	0.706138	PSMD13;PSMD2;PSME1
TRAF6 Mediated Induction Of NFkB And MAP Kinases Upon TLR7/8 Or 9 Activation R-HSA-975138	5/101	0.527178	0.769992	1.04464	0.668798	CASP8;PPP2R1A;TMED7-TICAM2;TLR7;NFKB1
Class I MHC Mediated Antigen Processing And Presentation R-HSA-983169	18/378	0.530154	0.769992	1.00268	0.636289	UBA7;PSMD13;ERAP1;HUWE1;ASB13;RNF6;ATG14;UBE2Z;TAPBP;KLHL9;SEC61A1;PSMD2;FBXO4;PSME1;ASB7;RBBP6;DZIP3;RNF220
Early SARS-CoV-2 Infection Events R-HSA-9772572	2/37	0.530192	0.769992	1.14617	0.727265	NRP1;VCP
Formation Of Fibrin Clot (Clotting Cascade) R-HSA-140877	2/37	0.530192	0.769992	1.14617	0.727265	F2R;PRCP
NCAM1 Interactions R-HSA-419037	2/37	0.530192	0.769992	1.14617	0.727265	COL6A1;GFRA2
RHOV GTPase Cycle R-HSA-9013424	2/37	0.530192	0.769992	1.14617	0.727265	USP9X;PIK3R1
Regulation Of TP53 Expression And Degradation R-HSA-6806003	2/37	0.530192	0.769992	1.14617	0.727265	PPP2R1A;ATM
COPI-mediated Anterograde Transport R-HSA-6807878	4/80	0.530818	0.769992	1.05564	0.668572	NSF;ANK2;ANK1;COPE
Regulation Of APC/C Activators Between G1/S And Early Anaphase R-HSA-176408	4/80	0.530818	0.769992	1.05564	0.668572	PSMD13;PSMD2;PSME1;BUB3
MyD88 Dependent Cascade Initiated On Endosome R-HSA-975155	5/102	0.535999	0.769992	1.03382	0.644714	CASP8;PPP2R1A;TMED7-TICAM2;TLR7;NFKB1
Degradation Of GLI1 By Proteasome R-HSA-5610780	3/59	0.53607	0.769992	1.07448	0.669931	PSMD13;PSMD2;PSME1
GLI3 Is Processed To GLI3R By Proteasome R-HSA-5610785	3/59	0.53607	0.769992	1.07448	0.669931	PSMD13;PSMD2;PSME1
O-linked Glycosylation Of Mucins R-HSA-913709	3/59	0.53607	0.769992	1.07448	0.669931	GALNT11;ST6GAL1;ST3GAL4
SCF(Skp2)-mediated Degradation Of P27/P21 R-HSA-187577	3/59	0.53607	0.769992	1.07448	0.669931	PSMD13;PSMD2;PSME1
Role Of GTSE1 In G2/M Progression After G2 Checkpoint R-HSA-8852276	3/59	0.53607	0.769992	1.07448	0.669931	PSMD13;PSMD2;PSME1
Senescence-Associated Secretory Phenotype (SASP) R-HSA-2559582	4/81	0.540703	0.769992	1.04187	0.640632	H2BC26;H3C13;H2AC7;NFKB1
CRMPs In Sema3A Signaling R-HSA-399956	1/16	0.541108	0.769992	1.3372	0.821221	NRP1
FGFR1 Ligand Binding And Activation R-HSA-190242	1/16	0.541108	0.769992	1.3372	0.821221	FGFR1
FOXO-mediated Transcription Of Cell Death Genes R-HSA-9614657	1/16	0.541108	0.769992	1.3372	0.821221	FOXO3
Hyaluronan Metabolism R-HSA-2142845	1/16	0.541108	0.769992	1.3372	0.821221	CD44
MAP3K8 (TPL2)-dependent MAPK1/3 Activation R-HSA-5684264	1/16	0.541108	0.769992	1.3372	0.821221	NFKB1
PKA Activation In Glucagon Signaling R-HSA-164378	1/16	0.541108	0.769992	1.3372	0.821221	ADCY1
Phospholipase C-mediated Cascade: FGFR1 R-HSA-5654219	1/16	0.541108	0.769992	1.3372	0.821221	FGFR1
Polo-like Kinase Mediated Events R-HSA-156711	1/16	0.541108	0.769992	1.3372	0.821221	LIN37
Rap1 Signaling R-HSA-392517	1/16	0.541108	0.769992	1.3372	0.821221	RAPGEF4
Regulation Of Pyruvate Dehydrogenase (PDH) Complex R-HSA-204174	1/16	0.541108	0.769992	1.3372	0.821221	PPARD
STING Mediated Induction Of Host Immune Responses R-HSA-1834941	1/16	0.541108	0.769992	1.3372	0.821221	IRF3
Spry Regulation Of FGF Signaling R-HSA-1295596	1/16	0.541108	0.769992	1.3372	0.821221	PPP2R1A
TGF-beta Receptor Signaling In EMT (Epithelial To Mesenchymal Transition) R-HSA-2173791	1/16	0.541108	0.769992	1.3372	0.821221	TGFBR2
TRAF6-mediated Induction Of TAK1 Complex Within TLR4 Complex R-HSA-937072	1/16	0.541108	0.769992	1.3372	0.821221	TMED7-TICAM2
Transcription Of E2F Targets Under Negative Control By P107 (RBL1) And P130 (RBL2) In Complex With HDAC1 R-HSA-1362300	1/16	0.541108	0.769992	1.3372	0.821221	LIN37
VLDLR Internalisation And Degradation R-HSA-8866427	1/16	0.541108	0.769992	1.3372	0.821221	AP2M1
p75NTR Signals Via NF-kB R-HSA-193639	1/16	0.541108	0.769992	1.3372	0.821221	NFKB1
Association Of TriC/CCT With Target Proteins During Biosynthesis R-HSA-390471	2/38	0.544685	0.770862	1.11428	0.676975	USP11;FBXO4
FCGR3A-mediated IL10 Synthesis R-HSA-9664323	2/38	0.544685	0.770862	1.11428	0.676975	PRKX;ADCY1
Resolution Of Abasic Sites (AP Sites) R-HSA-73933	2/38	0.544685	0.770862	1.11428	0.676975	MBD4;PARP1
Toll Like Receptor 3 (TLR3) Cascade R-HSA-168164	5/103	0.544743	0.770862	1.02322	0.621544	CASP8;IRF3;PPP2R1A;NFKB1;BIRC3
Toll Like Receptor 7/8 (TLR7/8) Cascade R-HSA-168181	5/103	0.544743	0.770862	1.02322	0.621544	CASP8;PPP2R1A;TMED7-TICAM2;TLR7;NFKB1
Mitotic Anaphase R-HSA-68882	11/232	0.546156	0.771387	0.998072	0.603685	UBE2I;PPP2R1A;PSMD13;PSMD2;NDE1;NUP62;PSME1;NUP43;BUB3;CKAP5;NUP58
FCGR3A-mediated Phagocytosis R-HSA-9664422	3/60	0.547533	0.771387	1.05558	0.635808	ABI1;ELMO1;WASF2
Recruitment And ATM-mediated Phosphorylation Of Repair And Signal Proteins At DNA Double Strand Breaks R-HSA-5693565	3/60	0.547533	0.771387	1.05558	0.635808	H2BC26;UBE2I;ATM
rRNA Modification In Nucleus And Cytosol R-HSA-6790901	3/60	0.547533	0.771387	1.05558	0.635808	NOP14;UTP6;WDR3
Cyclin E Associated Events During G1/S Transition R-HSA-69202	4/82	0.550479	0.77258	1.02846	0.613955	LIN37;PSMD13;PSMD2;PSME1
Mitotic Metaphase And Anaphase R-HSA-2555396	11/233	0.551962	0.77258	0.993524	0.590427	UBE2I;PPP2R1A;PSMD13;PSMD2;NDE1;NUP62;PSME1;NUP43;BUB3;CKAP5;NUP58
Antigen processing-Cross Presentation R-HSA-1236975	5/104	0.553408	0.77258	1.01283	0.599248	SEC61A1;PSMD13;PSMD2;PSME1;TAPBP
DNA Double Strand Break Response R-HSA-5693606	3/61	0.558829	0.77258	1.03732	0.603631	H2BC26;UBE2I;ATM
Nuclear Events (Kinase And Transcription Factor Activation) R-HSA-198725	3/61	0.558829	0.77258	1.03732	0.603631	PPP2R1A;TCF12;MEF2D
Selective Autophagy R-HSA-9663891	3/61	0.558829	0.77258	1.03732	0.603631	VCP;NBR1;ATM
NGF-stimulated Transcription R-HSA-9031628	2/39	0.558864	0.77258	1.0841	0.630785	TCF12;MEF2D
Ovarian Tumor Domain Proteases R-HSA-5689896	2/39	0.558864	0.77258	1.0841	0.630785	VCP;ESR1
RHOU GTPase Cycle R-HSA-9013420	2/39	0.558864	0.77258	1.0841	0.630785	USP9X;PIK3R1
Signaling By FGFR3 R-HSA-5654741	2/39	0.558864	0.77258	1.0841	0.630785	PPP2R1A;PIK3R1
Translesion Synthesis By Y Family DNA Polymerases Bypasses Lesions On DNA Template R-HSA-110313	2/39	0.558864	0.77258	1.0841	0.630785	VCP;UBA7
G2/M Checkpoints R-HSA-69481	7/148	0.559032	0.77258	0.995487	0.578924	H2BC26;PSMD13;PSMD2;PSME1;RAD17;ATM;TOPBP1
Separation Of Sister Chromatids R-HSA-2467813	8/170	0.561706	0.77258	0.990171	0.571107	PPP2R1A;PSMD13;PSMD2;NDE1;PSME1;NUP43;BUB3;CKAP5
Acetylcholine Neurotransmitter Release Cycle R-HSA-264642	1/17	0.562923	0.77258	1.25356	0.720309	PPFIA4
Acyl Chain Remodelling Of PI R-HSA-1482922	1/17	0.562923	0.77258	1.25356	0.720309	PLA2R1
Butyrate Response Factor 1 Binds And Destabilizes mRNA R-HSA-450385	1/17	0.562923	0.77258	1.25356	0.720309	DCP1A
Formation Of Senescence-Associated Heterochromatin Foci (SAHF) R-HSA-2559584	1/17	0.562923	0.77258	1.25356	0.720309	H1-5
PKA Activation R-HSA-163615	1/17	0.562923	0.77258	1.25356	0.720309	ADCY1
Platelet Sensitization By LDL R-HSA-432142	1/17	0.562923	0.77258	1.25356	0.720309	PPP2R1A
Protein Methylation R-HSA-8876725	1/17	0.562923	0.77258	1.25356	0.720309	VCP
RIP-mediated NFkB Activation Via ZBP1 R-HSA-1810476	1/17	0.562923	0.77258	1.25356	0.720309	NFKB1
Removal Of Flap Intermediate From C-strand R-HSA-174437	1/17	0.562923	0.77258	1.25356	0.720309	POT1
Tie2 Signaling R-HSA-210993	1/17	0.562923	0.77258	1.25356	0.720309	PIK3R1
Tristetraprolin (TTP, ZFP36) Binds And Destabilizes mRNA R-HSA-450513	1/17	0.562923	0.77258	1.25356	0.720309	DCP1A
DNA Replication Pre-Initiation R-HSA-69002	6/127	0.564063	0.773313	0.994309	0.569331	H2BC26;H3C13;H2AC7;PSMD13;PSMD2;PSME1
Cyclin A:Cdk2-associated Events At S Phase Entry R-HSA-69656	4/84	0.569698	0.777944	1.00264	0.564135	LIN37;PSMD13;PSMD2;PSME1
Asymmetric Localization Of PCP Proteins R-HSA-4608870	3/62	0.569952	0.777944	1.01969	0.573271	PSMD13;PSMD2;PSME1
RAB Geranylgeranylation R-HSA-8873719	3/62	0.569952	0.777944	1.01969	0.573271	RAB2B;RAB30;RAB7A
Resolution Of Sister Chromatid Cohesion R-HSA-2500257	5/106	0.570492	0.777944	0.992666	0.557139	PPP2R1A;NDE1;NUP43;BUB3;CKAP5
Toll Like Receptor 9 (TLR9) Cascade R-HSA-168138	5/106	0.570492	0.777944	0.992666	0.557139	CASP8;PPP2R1A;TMED7-TICAM2;TLR7;NFKB1
Class C/3 (Metabotropic Glutamate/Pheromone Receptors) R-HSA-420499	2/40	0.572724	0.77849	1.05552	0.588294	GRM7;TAS2R46
Collagen Degradation R-HSA-1442490	2/40	0.572724	0.77849	1.05552	0.588294	ADAM17;MMP1
Signaling By FGFR4 R-HSA-5654743	2/40	0.572724	0.77849	1.05552	0.588294	PPP2R1A;PIK3R1
Hedgehog On State R-HSA-5632684	4/85	0.579134	0.780923	0.990212	0.540875	PSMD13;PSMD2;PSME1;GLI2
G1/S Transition R-HSA-69206	6/129	0.579459	0.780923	0.978038	0.533676	LIN37;PPP2R1A;PSMD13;PSMD2;PSME1;PPP2R3B
Autodegradation Of Cdh1 By Cdh1:APC/C R-HSA-174084	3/63	0.580901	0.780923	1.00264	0.544609	PSMD13;PSMD2;PSME1
ABC Transporters In Lipid Homeostasis R-HSA-1369062	1/18	0.583702	0.780923	1.17976	0.63514	ABCA6
Acyl Chain Remodelling Of PG R-HSA-1482925	1/18	0.583702	0.780923	1.17976	0.63514	PLA2R1
Assembly Of HIV Virion R-HSA-175474	1/18	0.583702	0.780923	1.17976	0.63514	MVB12B
Constitutive Signaling By Ligand-Responsive EGFR Cancer Variants R-HSA-1236382	1/18	0.583702	0.780923	1.17976	0.63514	PIK3R1
Lewis Blood Group Biosynthesis R-HSA-9037629	1/18	0.583702	0.780923	1.17976	0.63514	ST3GAL4
MECP2 Regulates Neuronal Receptors And Channels R-HSA-9022699	1/18	0.583702	0.780923	1.17976	0.63514	SIN3A
Metabolism Of Angiotensinogen To Angiotensins R-HSA-2022377	1/18	0.583702	0.780923	1.17976	0.63514	ANPEP
Norepinephrine Neurotransmitter Release Cycle R-HSA-181430	1/18	0.583702	0.780923	1.17976	0.63514	PPFIA4
PI-3K cascade:FGFR3 R-HSA-5654710	1/18	0.583702	0.780923	1.17976	0.63514	PIK3R1
Recycling Of Bile Acids And Salts R-HSA-159418	1/18	0.583702	0.780923	1.17976	0.63514	STARD5
Regulation Of NF-kappa B Signaling R-HSA-9758274	1/18	0.583702	0.780923	1.17976	0.63514	CASP8
Serotonin Neurotransmitter Release Cycle R-HSA-181429	1/18	0.583702	0.780923	1.17976	0.63514	PPFIA4
Interleukin-1 Family Signaling R-HSA-446652	7/152	0.587475	0.785148	0.967821	0.514804	MAP3K3;CASP8;PSMD13;PSMD2;PSME1;PTPN7;NFKB1
Muscle Contraction R-HSA-397014	9/196	0.589295	0.786755	0.964766	0.510196	RYR1;FXYD6-FXYD2;NPPC;DMPK;FXYD2;ATP1A2;CLIC2;TBX5;SORBS3
Oxygen-dependent Proline Hydroxylation Of Hypoxia-inducible Factor Alpha R-HSA-1234176	3/64	0.591671	0.786914	0.986151	0.517536	PSMD13;PSMD2;PSME1
Degradation Of Extracellular Matrix R-HSA-1474228	5/109	0.595467	0.786914	0.963879	0.499684	ADAM17;MMP1;CXXC1;PSEN1;CD44
APC/C-mediated Degradation Of Cell Cycle Proteins R-HSA-174143	4/87	0.597645	0.786914	0.96625	0.497386	PSMD13;PSMD2;PSME1;BUB3
Cell Cycle, Mitotic R-HSA-69278	24/523	0.599396	0.786914	0.963534	0.493168	CEP57;NEK9;UBE2I;LIN37;NUMA1;H2AC7;PSMD13;NDE1;PPP2R3B;CKAP5;MAU2;H2BC26;H3C13;PPP2R1A;PSMD2;NUP50;CNTRL;NUP62;PSME1;TUBGCP6;NUP43;BUB3;LPIN2;NUP58
Activation Of Gene Expression By SREBF (SREBP) R-HSA-2426168	2/42	0.599485	0.786914	1.00264	0.513034	MBD4;CHD9
Deactivation Of Beta-Catenin Transactivating Complex R-HSA-3769402	2/42	0.599485	0.786914	1.00264	0.513034	TLE3;CTNNB1
Signaling By FGFR2 In Disease R-HSA-5655253	2/42	0.599485	0.786914	1.00264	0.513034	POLR2D;PIK3R1
Signaling By SCF-KIT R-HSA-1433557	2/42	0.599485	0.786914	1.00264	0.513034	STAT1;PIK3R1
tRNA Modification In Nucleus And Cytosol R-HSA-6782315	2/42	0.599485	0.786914	1.00264	0.513034	URM1;TYW1
Antigen Processing: Ubiquitination And Proteasome Degradation R-HSA-983168	14/307	0.600919	0.786914	0.95752	0.487661	UBA7;PSMD13;HUWE1;ASB13;RNF6;UBE2Z;KLHL9;PSMD2;FBXO4;PSME1;ASB7;RBBP6;DZIP3;RNF220
Aflatoxin Activation And Detoxification R-HSA-5423646	1/19	0.603494	0.786914	1.11416	0.562671	GGT5
GABA Synthesis, Release, Reuptake And Degradation R-HSA-888590	1/19	0.603494	0.786914	1.11416	0.562671	DNAJC5
Initiation Of Nuclear Envelope (NE) Reformation R-HSA-2995383	1/19	0.603494	0.786914	1.11416	0.562671	PPP2R1A
Processive Synthesis On C-strand Of Telomere R-HSA-174414	1/19	0.603494	0.786914	1.11416	0.562671	POT1
RAS Processing R-HSA-9648002	1/19	0.603494	0.786914	1.11416	0.562671	PRKCQ
RHO GTPases Activate ROCKs R-HSA-5627117	1/19	0.603494	0.786914	1.11416	0.562671	LIMK1
Ras Activation Upon Ca2+ Influx Thru NMDA Receptor R-HSA-442982	1/19	0.603494	0.786914	1.11416	0.562671	RASGRF1
Signaling By FGFR2 IIIa TM R-HSA-8851708	1/19	0.603494	0.786914	1.11416	0.562671	POLR2D
Signaling To RAS R-HSA-167044	1/19	0.603494	0.786914	1.11416	0.562671	MAPK13
TICAM1, RIP1-mediated IKK Complex Recruitment R-HSA-168927	1/19	0.603494	0.786914	1.11416	0.562671	BIRC3
Transcription Of E2F Targets Under Negative Control By DREAM Complex R-HSA-1362277	1/19	0.603494	0.786914	1.11416	0.562671	LIN37
Translesion Synthesis By POLH R-HSA-110320	1/19	0.603494	0.786914	1.11416	0.562671	VCP
Mitotic Spindle Checkpoint R-HSA-69618	5/110	0.603609	0.786914	0.954649	0.481934	PPP2R1A;NDE1;NUP43;BUB3;CKAP5
Opioid Signaling R-HSA-111885	4/88	0.606715	0.790155	0.954696	0.477058	PPP2R1A;PRKX;ADCY1;CAMKK2
ER To Golgi Anterograde Transport R-HSA-199977	6/133	0.609402	0.792844	0.947034	0.469045	NSF;TRAPPC2L;PPP6R3;ANK2;ANK1;COPE
Formation Of HIV-1 Elongation Complex Containing HIV-1 Tat R-HSA-167200	2/43	0.612384	0.793853	0.978131	0.479672	ERCC3;POLR2D
GPER1 Signaling R-HSA-9634597	2/43	0.612384	0.793853	0.978131	0.479672	ADCY1;ITGA5
Transport Of Vitamins, Nucleosides, And Related Molecules R-HSA-425397	2/43	0.612384	0.793853	0.978131	0.479672	SLC33A1;SLC27A6
COPII-mediated Vesicle Transport R-HSA-204005	3/66	0.612668	0.793853	0.954744	0.46776	NSF;TRAPPC2L;PPP6R3
RAB GEFs Exchange GTP For GDP On RABs R-HSA-8876198	4/89	0.61566	0.795237	0.943415	0.457614	DENND1B;TRAPPC2L;RIN2;RAB7A
CD209 (DC-SIGN) Signaling R-HSA-5621575	1/20	0.622345	0.795237	1.05546	0.500562	NFKB1
Chondroitin Sulfate Biosynthesis R-HSA-2022870	1/20	0.622345	0.795237	1.05546	0.500562	CHST11
Nef-mediated Downmodulation Of Cell Surface Receptors By Recruitment To Clathrin Adapters R-HSA-164938	1/20	0.622345	0.795237	1.05546	0.500562	AP2M1
PI-3K cascade:FGFR4 R-HSA-5654720	1/20	0.622345	0.795237	1.05546	0.500562	PIK3R1
Regulation Of Gene Expression In Beta Cells R-HSA-210745	1/20	0.622345	0.795237	1.05546	0.500562	PAX6
SHC-mediated cascade:FGFR1 R-HSA-5654688	1/20	0.622345	0.795237	1.05546	0.500562	FGFR1
Sema4D Induced Cell Migration And Growth-Cone Collapse R-HSA-416572	1/20	0.622345	0.795237	1.05546	0.500562	LIMK1
APC/C:Cdc20 Mediated Degradation Of Securin R-HSA-174154	3/67	0.62289	0.795237	0.939777	0.444876	PSMD13;PSMD2;PSME1
Collagen Biosynthesis And Modifying Enzymes R-HSA-1650814	3/67	0.62289	0.795237	0.939777	0.444876	COL1A1;COL6A1;COL4A6
Regulation Of PTEN Stability And Activity R-HSA-8948751	3/67	0.62289	0.795237	0.939777	0.444876	PSMD13;PSMD2;PSME1
Collagen Formation R-HSA-1474290	4/90	0.624476	0.795237	0.932396	0.439011	COL1A1;COL6A1;LOXL3;COL4A6
Regulation Of TP53 Activity Thru Phosphorylation R-HSA-6804756	4/90	0.624476	0.795237	0.932396	0.439011	RAD17;ATM;TAF6;TOPBP1
Interleukin-2 Family Signaling R-HSA-451927	2/44	0.624963	0.795237	0.954792	0.448813	STAT1;PIK3R1
Interleukin-3, Interleukin-5 And GM-CSF Signaling R-HSA-512988	2/44	0.624963	0.795237	0.954792	0.448813	PIK3R1;CRKL
PI3K Cascade R-HSA-109704	2/44	0.624963	0.795237	0.954792	0.448813	PIK3R1;FGFR1
Sphingolipid De Novo Biosynthesis R-HSA-1660661	2/44	0.624963	0.795237	0.954792	0.448813	SGMS1;VAPA
TGF-beta Receptor Signaling Activates SMADs R-HSA-2173789	2/44	0.624963	0.795237	0.954792	0.448813	SMAD7;TGFBR2
Intra-Golgi And Retrograde Golgi-to-ER Traffic R-HSA-6811442	8/181	0.632786	0.795697	0.926672	0.424066	NSF;TGOLN2;RAB30;AKR1B10;KIF5C;STX16;UBE2Z;COPE
Bile Acid And Bile Salt Metabolism R-HSA-194068	2/45	0.637222	0.795697	0.932539	0.420236	OSBPL9;STARD5
Formation Of HIV Elongation Complex In Absence Of HIV Tat R-HSA-167152	2/45	0.637222	0.795697	0.932539	0.420236	ERCC3;POLR2D
TAK1-dependent IKK And NF-kappa-B Activation R-HSA-445989	2/45	0.637222	0.795697	0.932539	0.420236	CASP8;NFKB1
Influenza Viral RNA Transcription And Replication R-HSA-168273	6/137	0.638129	0.795697	0.917923	0.412344	PARP1;NUP50;NUP62;POLR2D;NUP43;NUP58
Cell Cycle Checkpoints R-HSA-69620	12/271	0.63982	0.795697	0.928172	0.414493	H2BC26;PPP2R1A;PSMD13;PSMD2;NDE1;PSME1;RAD17;ATM;NUP43;TOPBP1;BUB3;CKAP5
Azathioprine ADME R-HSA-9748787	1/21	0.640302	0.795697	1.00263	0.44699	ABCC4
Branched-chain Amino Acid Catabolism R-HSA-70895	1/21	0.640302	0.795697	1.00263	0.44699	IVD
Cobalamin (Cbl, Vitamin B12) Transport And Metabolism R-HSA-196741	1/21	0.640302	0.795697	1.00263	0.44699	CBLIF
Defects In Vitamin And Cofactor Metabolism R-HSA-3296482	1/21	0.640302	0.795697	1.00263	0.44699	CBLIF
Deregulated CDK5 Triggers Neurodegenerative Pathways In Alzheimers Disease Models R-HSA-8862803	1/21	0.640302	0.795697	1.00263	0.44699	FOXO3
HS-GAG Degradation R-HSA-2024096	1/21	0.640302	0.795697	1.00263	0.44699	SGSH
Inactivation Of APC/C Via Direct Inhibition Of APC/C Complex R-HSA-141430	1/21	0.640302	0.795697	1.00263	0.44699	BUB3
Initial Triggering Of Complement R-HSA-166663	1/21	0.640302	0.795697	1.00263	0.44699	MASP1
Interleukin-37 Signaling R-HSA-9008059	1/21	0.640302	0.795697	1.00263	0.44699	PTPN7
Intrinsic Pathway Of Fibrin Clot Formation R-HSA-140837	1/21	0.640302	0.795697	1.00263	0.44699	PRCP
Nitric Oxide Stimulates Guanylate Cyclase R-HSA-392154	1/21	0.640302	0.795697	1.00263	0.44699	NANOS2
RHO GTPases Activate PAKs R-HSA-5627123	1/21	0.640302	0.795697	1.00263	0.44699	LIMK1
SHC1 Events In ERBB2 Signaling R-HSA-1250196	1/21	0.640302	0.795697	1.00263	0.44699	NRG3
Signaling By ERBB2 TMD/JMD Mutants R-HSA-9665686	1/21	0.640302	0.795697	1.00263	0.44699	NRG3
Signaling By FGFR3 In Disease R-HSA-5655332	1/21	0.640302	0.795697	1.00263	0.44699	PIK3R1
Synthesis Of Leukotrienes (LT) And Eoxins (EX) R-HSA-2142691	1/21	0.640302	0.795697	1.00263	0.44699	GGT5
TP53 Regulates Transcription Of Additional Cell Cycle Genes With Uncertain Roles In P53 Pathway R-HSA-6804115	1/21	0.640302	0.795697	1.00263	0.44699	CNOT2
Unblocking Of NMDA Receptors, Glutamate Binding And Activation R-HSA-438066	1/21	0.640302	0.795697	1.00263	0.44699	GRIA4
Orc1 Removal From Chromatin R-HSA-68949	3/69	0.642776	0.797993	0.911203	0.402715	PSMD13;PSMD2;PSME1
Acyl Chain Remodelling Of PS R-HSA-1482801	1/22	0.657405	0.809847	0.95484	0.400512	PLA2R1
Blood Group Systems Biosynthesis R-HSA-9033658	1/22	0.657405	0.809847	0.95484	0.400512	ST3GAL4
Common Pathway Of Fibrin Clot Formation R-HSA-140875	1/22	0.657405	0.809847	0.95484	0.400512	F2R
ERK/MAPK Targets R-HSA-198753	1/22	0.657405	0.809847	0.95484	0.400512	PPP2R1A
FRS-mediated FGFR1 Signaling R-HSA-5654693	1/22	0.657405	0.809847	0.95484	0.400512	FGFR1
Insertion Of Tail-Anchored Proteins Into Endoplasmic Reticulum Membrane R-HSA-9609523	1/22	0.657405	0.809847	0.95484	0.400512	VAPA
Nephrin Family Interactions R-HSA-373753	1/22	0.657405	0.809847	0.95484	0.400512	PIK3R1
Signaling By NODAL R-HSA-1181150	1/22	0.657405	0.809847	0.95484	0.400512	FOXO3
Toll Like Receptor 4 (TLR4) Cascade R-HSA-166016	6/140	0.658831	0.81082	0.89723	0.374404	CASP8;IRF3;PPP2R1A;TMED7-TICAM2;NFKB1;BIRC3
Cyclin D Associated Events In G1 R-HSA-69231	2/47	0.660794	0.810887	0.890999	0.369153	PPP2R1A;PPP2R3B
G Alpha (Z) Signaling Events R-HSA-418597	2/47	0.660794	0.810887	0.890999	0.369153	PRKCQ;ADCY1
IRS-mediated Signaling R-HSA-112399	2/47	0.660794	0.810887	0.890999	0.369153	PIK3R1;FGFR1
trans-Golgi Network Vesicle Budding R-HSA-199992	3/71	0.661909	0.811475	0.88431	0.36489	TPD52;TGOLN2;DNAJC6
C-type Lectin Receptors (CLRs) R-HSA-5621481	6/141	0.665565	0.815173	0.890537	0.362554	CASP8;CCL22;PSMD13;PSMD2;PSME1;NFKB1
Metabolism Of Nucleotides R-HSA-15869	4/95	0.666595	0.815651	0.880933	0.357282	RRM2B;TXNRD1;AMPD1;AMPD3
CDK-mediated Phosphorylation And Removal Of Cdc6 R-HSA-69017	3/72	0.671194	0.816505	0.871448	0.347444	PSMD13;PSMD2;PSME1
Signaling By FGFR2 R-HSA-5654738	3/72	0.671194	0.816505	0.871448	0.347444	PPP2R1A;POLR2D;PIK3R1
Abortive Elongation Of HIV-1 Transcript In Absence Of Tat R-HSA-167242	1/23	0.673697	0.816505	0.91139	0.359977	POLR2D
BBSome-mediated Cargo-Targeting To Cilium R-HSA-5620922	1/23	0.673697	0.816505	0.91139	0.359977	BBS9
CD28 Dependent PI3K/Akt Signaling R-HSA-389357	1/23	0.673697	0.816505	0.91139	0.359977	PIK3R1
Digestion R-HSA-8935690	1/23	0.673697	0.816505	0.91139	0.359977	PNLIPRP1
Dopamine Neurotransmitter Release Cycle R-HSA-212676	1/23	0.673697	0.816505	0.91139	0.359977	PPFIA4
Miscellaneous Transport And Binding Events R-HSA-5223345	1/23	0.673697	0.816505	0.91139	0.359977	ADD1
PI-3K cascade:FGFR2 R-HSA-5654695	1/23	0.673697	0.816505	0.91139	0.359977	PIK3R1
RAF-independent MAPK1/3 Activation R-HSA-112409	1/23	0.673697	0.816505	0.91139	0.359977	DUSP10
Protein Folding R-HSA-391251	4/96	0.674619	0.816846	0.871312	0.342955	USP11;TBCE;FBXO4;TBCD
APC/C:Cdh1 Mediated Degradation Of Cdc20 And APC/C:Cdh1 Targets In Late Mitosis/Early G1 R-HSA-174178	3/73	0.680289	0.82293	0.858953	0.330901	PSMD13;PSMD2;PSME1
Signaling By ERBB2 R-HSA-1227986	2/49	0.683118	0.823568	0.852994	0.325065	NRG3;PIK3R1
Formation Of Cornified Envelope R-HSA-6809371	3/74	0.689196	0.823568	0.846811	0.315207	ST14;IVL;KLK12
Aggrephagy R-HSA-9646399	1/24	0.689214	0.823568	0.871719	0.324457	VCP
Cytosolic tRNA Aminoacylation R-HSA-379716	1/24	0.689214	0.823568	0.871719	0.324457	2001-03-01
DARPP-32 Events R-HSA-180024	1/24	0.689214	0.823568	0.871719	0.324457	PPP2R1A
Defective Intrinsic Pathway For Apoptosis R-HSA-9734009	1/24	0.689214	0.823568	0.871719	0.324457	FOXO3
Downstream Signaling Of Activated FGFR3 R-HSA-5654708	1/24	0.689214	0.823568	0.871719	0.324457	PIK3R1
Estrogen-dependent Nuclear Events Downstream Of ESR-membrane Signaling R-HSA-9634638	1/24	0.689214	0.823568	0.871719	0.324457	FOXO3
Glycogen Metabolism R-HSA-8982491	1/24	0.689214	0.823568	0.871719	0.324457	PHKA2
Impaired BRCA2 Binding To PALB2 R-HSA-9709603	1/24	0.689214	0.823568	0.871719	0.324457	ATM
RUNX2 Regulates Osteoblast Differentiation R-HSA-8940973	1/24	0.689214	0.823568	0.871719	0.324457	COL1A1
Sema4D In Semaphorin Signaling R-HSA-400685	1/24	0.689214	0.823568	0.871719	0.324457	LIMK1
Signaling By EGFR In Cancer R-HSA-1643713	1/24	0.689214	0.823568	0.871719	0.324457	PIK3R1
Extension Of Telomeres R-HSA-180786	2/50	0.693822	0.828299	0.835179	0.305291	PPP6R3;POT1
ADP Signaling Thru P2Y Purinoceptor 1 R-HSA-418592	1/25	0.703994	0.830608	0.835353	0.293197	P2RY1
Basigin Interactions R-HSA-210991	1/25	0.703994	0.830608	0.835353	0.293197	MMP1
Deadenylation Of mRNA R-HSA-429947	1/25	0.703994	0.830608	0.835353	0.293197	CNOT2
Defective HDR Thru Homologous Recombination (HRR) Due To BRCA1 Loss-Of-Function R-HSA-9701192	1/25	0.703994	0.830608	0.835353	0.293197	ATM
Gap Junction Trafficking R-HSA-190828	1/25	0.703994	0.830608	0.835353	0.293197	AP2M1
Glucuronidation R-HSA-156588	1/25	0.703994	0.830608	0.835353	0.293197	UGT2B28
Inactivation Of CSF3 (G-CSF) Signaling R-HSA-9705462	1/25	0.703994	0.830608	0.835353	0.293197	STAT1
Polymerase Switching On C-strand Of Telomere R-HSA-174411	1/25	0.703994	0.830608	0.835353	0.293197	POT1
Regulation Of IFNA/IFNB Signaling R-HSA-912694	1/25	0.703994	0.830608	0.835353	0.293197	STAT1
Resolution Of AP Sites Via Multiple-Nucleotide Patch Replacement Pathway R-HSA-110373	1/25	0.703994	0.830608	0.835353	0.293197	PARP1
TRAF6 Mediated NF-kB Activation R-HSA-933542	1/25	0.703994	0.830608	0.835353	0.293197	NFKB1
Mitotic G1 Phase And G1/S Transition R-HSA-453279	6/147	0.704181	0.830608	0.852371	0.298944	LIN37;PPP2R1A;PSMD13;PSMD2;PSME1;PPP2R3B
IRS-related Events Triggered By IGF1R R-HSA-2428928	2/51	0.704225	0.830608	0.818092	0.28687	PIK3R1;FGFR1
IGF1R Signaling Cascade R-HSA-2428924	2/52	0.714332	0.840717	0.801688	0.269694	PIK3R1;FGFR1
APC-Cdc20 Mediated Degradation Of Nek2A R-HSA-179409	1/26	0.718072	0.840717	0.801897	0.265577	BUB3
Attenuation Phase R-HSA-3371568	1/26	0.718072	0.840717	0.801897	0.265577	COL4A6
Constitutive Signaling By AKT1 E17K In Cancer R-HSA-5674400	1/26	0.718072	0.840717	0.801897	0.265577	FOXO3
Downstream Signaling Of Activated FGFR4 R-HSA-5654716	1/26	0.718072	0.840717	0.801897	0.265577	PIK3R1
FGFR2 Alternative Splicing R-HSA-6803529	1/26	0.718072	0.840717	0.801897	0.265577	POLR2D
Interleukin-20 Family Signaling R-HSA-8854691	1/26	0.718072	0.840717	0.801897	0.265577	STAT1
Sulfur Amino Acid Metabolism R-HSA-1614635	1/26	0.718072	0.840717	0.801897	0.265577	MTAP
Deposition Of New CENPA-containing Nucleosomes At Centromere R-HSA-606279	2/53	0.724147	0.844016	0.785927	0.253666	H2BC26;H2AC7
Insulin Receptor Signaling Cascade R-HSA-74751	2/53	0.724147	0.844016	0.785927	0.253666	PIK3R1;FGFR1
Signaling By Type 1 Insulin-like Growth Factor 1 Receptor (IGF1R) R-HSA-2404192	2/53	0.724147	0.844016	0.785927	0.253666	PIK3R1;FGFR1
ATF4 Activates Genes In Response To Endoplasmic Reticulum Stress R-HSA-380994	1/27	0.731481	0.844016	0.771014	0.241084	HERPUD1
Acyl Chain Remodelling Of PC R-HSA-1482788	1/27	0.731481	0.844016	0.771014	0.241084	PLA2R1
CREB1 Phosphorylation Thru NMDA Receptor-Mediated Activation Of RAS Signaling R-HSA-442742	1/27	0.731481	0.844016	0.771014	0.241084	RASGRF1
Effects Of PIP2 Hydrolysis R-HSA-114508	1/27	0.731481	0.844016	0.771014	0.241084	PRKCQ
Endogenous Sterols R-HSA-211976	1/27	0.731481	0.844016	0.771014	0.241084	CYP11B1
G0 And Early G1 R-HSA-1538133	1/27	0.731481	0.844016	0.771014	0.241084	LIN37
Gap Junction Trafficking And Regulation R-HSA-157858	1/27	0.731481	0.844016	0.771014	0.241084	AP2M1
Integrin Signaling R-HSA-354192	1/27	0.731481	0.844016	0.771014	0.241084	RAPGEF4
Interleukin Receptor SHC Signaling R-HSA-912526	1/27	0.731481	0.844016	0.771014	0.241084	PIK3R1
RNA Polymerase III Transcription Initiation From Type 3 Promoter R-HSA-76071	1/27	0.731481	0.844016	0.771014	0.241084	POU2F1
Resolution Of D-loop Structures Thru Synthesis-Dependent Strand Annealing (SDSA) R-HSA-5693554	1/27	0.731481	0.844016	0.771014	0.241084	ATM
Synthesis Of PC R-HSA-1483191	1/27	0.731481	0.844016	0.771014	0.241084	LPIN2
VEGFR2 Mediated Vascular Permeability R-HSA-5218920	1/27	0.731481	0.844016	0.771014	0.241084	CTNNB1
Autophagy R-HSA-9612973	5/128	0.732961	0.844257	0.81417	0.252933	VCP;MVB12B;NBR1;ATM;ATG14
Interleukin-12 Family Signaling R-HSA-447115	2/54	0.733676	0.844257	0.770772	0.238699	MTAP;STAT1
Pyruvate Metabolism And Citric Acid (TCA) Cycle R-HSA-71406	2/54	0.733676	0.844257	0.770772	0.238699	D2HGDH;PPARD
Integration Of Energy Metabolism R-HSA-163685	4/105	0.740756	0.849527	0.793293	0.238055	PPP2R1A;FFAR1;ADCY1;RAPGEF4
ECM Proteoglycans R-HSA-3000178	2/55	0.742923	0.849527	0.75619	0.224712	PTPRS;LRP4
Regulation Of Cholesterol Biosynthesis By SREBP (SREBF) R-HSA-1655829	2/55	0.742923	0.849527	0.75619	0.224712	MBD4;CHD9
DAP12 Signaling R-HSA-2424491	1/28	0.744252	0.849527	0.742419	0.219292	PIK3R1
Digestion And Absorption R-HSA-8963743	1/28	0.744252	0.849527	0.742419	0.219292	PNLIPRP1
Keratan Sulfate Biosynthesis R-HSA-2022854	1/28	0.744252	0.849527	0.742419	0.219292	ST3GAL4
MET Promotes Cell Motility R-HSA-8875878	1/28	0.744252	0.849527	0.742419	0.219292	CRKL
Recycling Pathway Of L1 R-HSA-437239	1/28	0.744252	0.849527	0.742419	0.219292	AP2M1
TRAF6 Mediated IRF7 Activation R-HSA-933541	1/28	0.744252	0.849527	0.742419	0.219292	IRF3
DNA Replication R-HSA-69306	6/155	0.750793	0.851972	0.806265	0.231096	H2BC26;H3C13;H2AC7;PSMD13;PSMD2;PSME1
Deadenylation-dependent mRNA Decay R-HSA-429914	2/56	0.751893	0.851972	0.742147	0.211631	CNOT2;DCP1A
O-linked Glycosylation R-HSA-5173105	4/107	0.753977	0.851972	0.777807	0.219647	GALNT11;ST6GAL1;ADAMTSL2;ST3GAL4
Acyl Chain Remodelling Of PE R-HSA-1482839	1/29	0.756417	0.851972	0.715866	0.199843	PLA2R1
Adherens Junctions Interactions R-HSA-418990	1/29	0.756417	0.851972	0.715866	0.199843	CTNNB1
Budding And Maturation Of HIV Virion R-HSA-162588	1/29	0.756417	0.851972	0.715866	0.199843	MVB12B
Downregulation Of ERBB2 Signaling R-HSA-8863795	1/29	0.756417	0.851972	0.715866	0.199843	NRG3
Downstream Signaling Of Activated FGFR2 R-HSA-5654696	1/29	0.756417	0.851972	0.715866	0.199843	PIK3R1
EGR2 And SOX10-mediated Initiation Of Schwann Cell Myelination R-HSA-9619665	1/29	0.756417	0.851972	0.715866	0.199843	SMARCA4
Energy Dependent Regulation Of mTOR By LKB1-AMPK R-HSA-380972	1/29	0.756417	0.851972	0.715866	0.199843	CAB39L
G1/S-Specific Transcription R-HSA-69205	1/29	0.756417	0.851972	0.715866	0.199843	LIN37
Negative Regulation Of FGFR3 Signaling R-HSA-5654732	1/29	0.756417	0.851972	0.715866	0.199843	PPP2R1A
Peroxisomal Lipid Metabolism R-HSA-390918	1/29	0.756417	0.851972	0.715866	0.199843	ACOX3
Surfactant Metabolism R-HSA-5683826	1/29	0.756417	0.851972	0.715866	0.199843	CTSH
Uptake And Actions Of Bacterial Toxins R-HSA-5339562	1/29	0.756417	0.851972	0.715866	0.199843	TXNRD1
Influenza Infection R-HSA-168255	6/157	0.761571	0.857019	0.795502	0.216673	PARP1;NUP50;NUP62;POLR2D;NUP43;NUP58
Endosomal Sorting Complex Required For Transport (ESCRT) R-HSA-917729	1/30	0.768004	0.860462	0.691145	0.182435	MVB12B
MAPK Targets/ Nuclear Events Mediated By MAP Kinases R-HSA-450282	1/30	0.768004	0.860462	0.691145	0.182435	PPP2R1A
RNA Polymerase I Transcription Termination R-HSA-73863	1/30	0.768004	0.860462	0.691145	0.182435	ERCC3
Recognition Of DNA Damage By PCNA-containing Replication Complex R-HSA-110314	1/30	0.768004	0.860462	0.691145	0.182435	DDB1
Signaling By CSF3 (G-CSF) R-HSA-9674555	1/30	0.768004	0.860462	0.691145	0.182435	STAT1
Hemostasis R-HSA-109582	24/576	0.775094	0.865778	0.868532	0.221277	NANOS2;ABCC4;MMP1;F2R;PRCP;PIK3R1;GLG1;JCHAIN;FCAMR;DOCK10;AKAP10;H3C13;SIN3A;PPP2R1A;KIF5C;P2RY1;GNA12;CEACAM21;PRKCQ;ITGA5;CD47;GAS6;CD44;RAPGEF4
GABA Receptor Activation R-HSA-977443	2/59	0.777201	0.865778	0.702976	0.17719	GABRR3;ADCY1
EGFR Downregulation R-HSA-182971	1/31	0.779041	0.865778	0.668072	0.166812	EPS15
Glyoxylate Metabolism And Glycine Degradation R-HSA-389661	1/31	0.779041	0.865778	0.668072	0.166812	ALDH4A1
Late Endosomal Microautophagy R-HSA-9615710	1/31	0.779041	0.865778	0.668072	0.166812	MVB12B
Metalloprotease DUBs R-HSA-5689901	1/31	0.779041	0.865778	0.668072	0.166812	H2AC7
Negative Regulation Of FGFR4 Signaling R-HSA-5654733	1/31	0.779041	0.865778	0.668072	0.166812	PPP2R1A
Pausing And Recovery Of Tat-mediated HIV Elongation R-HSA-167238	1/31	0.779041	0.865778	0.668072	0.166812	POLR2D
Pyruvate Metabolism R-HSA-70268	1/31	0.779041	0.865778	0.668072	0.166812	PPARD
Factors Involved In Megakaryocyte Development And Platelet Production R-HSA-983231	5/136	0.77954	0.865778	0.764126	0.190307	DOCK10;AKAP10;H3C13;KIF5C;SIN3A
Golgi-to-ER Retrograde Transport R-HSA-8856688	4/112	0.78475	0.870806	0.741602	0.179757	NSF;KIF5C;UBE2Z;COPE
GPVI-mediated Activation Cascade R-HSA-114604	1/32	0.789552	0.87083	0.646487	0.152758	PIK3R1
Glucagon Signaling In Metabolic Regulation R-HSA-163359	1/32	0.789552	0.87083	0.646487	0.152758	ADCY1
Gluconeogenesis R-HSA-70263	1/32	0.789552	0.87083	0.646487	0.152758	SLC25A12
Inactivation, Recovery And Regulation Of Phototransduction Cascade R-HSA-2514859	1/32	0.789552	0.87083	0.646487	0.152758	PRKCQ
PERK Regulates Gene Expression R-HSA-381042	1/32	0.789552	0.87083	0.646487	0.152758	HERPUD1
RAF Activation R-HSA-5673000	1/32	0.789552	0.87083	0.646487	0.152758	PPP2R1A
Termination Of Translesion DNA Synthesis R-HSA-5656169	1/32	0.789552	0.87083	0.646487	0.152758	UBA7
Regulation Of PTEN Gene Transcription R-HSA-8943724	2/61	0.792791	0.872779	0.679075	0.157678	PHC3;GATAD2B
G Alpha (Q) Signaling Events R-HSA-416476	8/212	0.79402	0.872779	0.784564	0.180957	PTGFR;CD200R1;RGS1;F2R;P2RY1;PRKCQ;PIK3R1;FFAR1
Macroautophagy R-HSA-1632852	4/114	0.796169	0.872779	0.728042	0.165953	VCP;NBR1;ATM;ATG14
Protein Localization R-HSA-9609507	6/164	0.796578	0.872779	0.759976	0.172841	NANOS2;VAPA;USP9X;AGPS;ACOX3;SLC25A12
Activation Of Matrix Metalloproteinases R-HSA-1592389	1/33	0.799565	0.872779	0.626251	0.140085	MMP1
Diseases Of Carbohydrate Metabolism R-HSA-5663084	1/33	0.799565	0.872779	0.626251	0.140085	SGSH
FGFR2 Mutant Receptor Activation R-HSA-1839126	1/33	0.799565	0.872779	0.626251	0.140085	POLR2D
HIV Elongation Arrest And Recovery R-HSA-167287	1/33	0.799565	0.872779	0.626251	0.140085	POLR2D
Keratan Sulfate/Keratin Metabolism R-HSA-1638074	1/33	0.799565	0.872779	0.626251	0.140085	ST3GAL4
Signal Amplification R-HSA-392518	1/33	0.799565	0.872779	0.626251	0.140085	P2RY1
Telomere C-strand (Lagging Strand) Synthesis R-HSA-174417	1/33	0.799565	0.872779	0.626251	0.140085	POT1
Phototransduction Cascade R-HSA-2514856	1/33	0.799565	0.872779	0.626251	0.140085	PRKCQ
MAP Kinase Activation R-HSA-450294	2/62	0.800219	0.872779	0.667722	0.148815	PPP2R1A;NFKB1
Sphingolipid Metabolism R-HSA-428157	3/89	0.801033	0.87292	0.698558	0.154978	GM2A;SGMS1;VAPA
Metabolism R-HSA-1430728	90/2049	0.803646	0.87502	0.913013	0.199582	CHD9;PRKCSH;SGSH;IL4I1;GM2A;SIN3A;PPP2R1A;LIPH;PSMD2;NUP62;PIP4K2A;PIP4K2B;FFAR1;TPTE2;STARD3;MANBA;STARD5;MIGA1;SECISBP2;NCOA3;MARS1;AMPD1;AMPD3;PHKA2;MED6;PLA2G15;MTAP;MED24;NCOR1;PKM;RRM2B;CYP2U1;NUP50;IVD;AGPS;PSME1;ACOX3;PLA2R1;SLC25A12;CES2;CD44;NUP58;PPARD;RAPGEF4;MTMR2;SGMS1;PSMD13;GLS2;MTMR9;UGT2B28;PIK3R1;ADCY1;PTGS1;MTM1;PTDSS1;CYP2B6;CHST11;FAM120B;INPP5E;ST3GAL4;D2HGDH;NUP43;GC;ACSS1…
Switching Of Origins To A Post-Replicative State R-HSA-69052	3/90	0.807121	0.877214	0.690493	0.14796	PSMD13;PSMD2;PSME1
CD28 Co-Stimulation R-HSA-389356	1/34	0.809101	0.877214	0.607242	0.128633	PIK3R1
Lysosome Vesicle Biogenesis R-HSA-432720	1/34	0.809101	0.877214	0.607242	0.128633	DNAJC6
Negative Regulation Of FGFR2 Signaling R-HSA-5654727	1/34	0.809101	0.877214	0.607242	0.128633	PPP2R1A
Synthesis Of Bile Acids And Bile Salts R-HSA-192105	1/34	0.809101	0.877214	0.607242	0.128633	OSBPL9
G Alpha (I) Signaling Events R-HSA-418594	12/312	0.811541	0.879112	0.799574	0.166968	GRM7;PPP2R1A;RGS1;P2RY14;PNOC;TAS2R46;PRKX;CCR6;ADCY1;PCDHA6;CAMKK2;CXCL16
Beta Defensins R-HSA-1461957	1/35	0.818184	0.884	0.589351	0.118264	CCR6
Gene And Protein Expression By JAK-STAT Signaling After Interleukin-12 Stimulation R-HSA-8950505	1/35	0.818184	0.884	0.589351	0.118264	MTAP
RNA Polymerase III Transcription Initiation R-HSA-76046	1/35	0.818184	0.884	0.589351	0.118264	POU2F1
Post-translational Modification: Synthesis Of GPI-anchored Proteins R-HSA-163125	3/92	0.818827	0.884	0.674905	0.134902	NEGR1;NTM;TECTA
GPCR Downstream Signaling R-HSA-388396	25/619	0.826064	0.888115	0.839749	0.160461	PTGFR;TAS2R46;PRKX;ADCY1;PIK3R1;CXCL16;CAMKK2;AKAP13;GRM7;PPP2R1A;RGS1;P2RY1;GNA12;CCR6;FFAR1;PCDHA6;P2RY14;F2R;TIAM1;CD200R1;PNOC;PRKCQ;ARHGEF1;ITGA5;PDE7A
Metabolism Of Amino Acids And Derivatives R-HSA-71291	14/364	0.826357	0.888115	0.799145	0.15242	PSMD13;GLS2;SECISBP2;TXNRD1;MARS1;ALDH4A1;IL4I1;MTAP;GATM;PSMD2;PAH;IVD;PSME1;SLC25A12
Activation Of ATR In Response To Replication Stress R-HSA-176187	1/36	0.826835	0.888115	0.572482	0.108857	RAD17
HSF1-dependent Transactivation R-HSA-3371571	1/36	0.826835	0.888115	0.572482	0.108857	COL4A6
Platelet Aggregation (Plug Formation) R-HSA-76009	1/36	0.826835	0.888115	0.572482	0.108857	RAPGEF4
SMAD2/SMAD3:SMAD4 Heterotrimer Regulates Transcription R-HSA-2173796	1/36	0.826835	0.888115	0.572482	0.108857	SMAD7
Glycosaminoglycan Metabolism R-HSA-1630316	4/120	0.827514	0.888115	0.690165	0.130668	CHST11;ST3GAL4;CD44;SGSH
Signaling By GPCR R-HSA-372790	28/689	0.829251	0.889231	0.844858	0.158184	PTGFR;TAS2R46;PRKX;ADCY1;PIK3R1;CXCL16;CAMKK2;AKAP13;ADGRE2;GRM7;PPP2R1A;RGS1;P2RY1;GNA12;CCR6;FFAR1;PCDHA6;CCL22;P2RY14;WNT7B;F2R;TIAM1;CD200R1;PNOC;PRKCQ;ARHGEF1;ITGA5;PDE7A
Leishmania Infection R-HSA-9658195	9/247	0.834748	0.892474	0.755981	0.13655	GGT5;ADAM17;ABI1;ELMO1;TXNIP;PRKX;ADCY1;WASF2;NFKB1
Defective B3GALTL Causes PpS R-HSA-5083635	1/37	0.835075	0.892474	0.556551	0.100309	ADAMTSL2
Fatty acyl-CoA Biosynthesis R-HSA-75105	1/37	0.835075	0.892474	0.556551	0.100309	PPT1
Triglyceride Metabolism R-HSA-8979227	1/37	0.835075	0.892474	0.556551	0.100309	LPIN2
Diseases Of Mitotic Cell Cycle R-HSA-9675126	1/38	0.842924	0.898602	0.54148	0.0925275	ATRX
HSP90 Chaperone Cycle For Steroid Hormone Receptors (SHR) In Presence Of Ligand R-HSA-3371497	1/38	0.842924	0.898602	0.54148	0.0925275	PGR
O-glycosylation Of TSR Domain-Containing Proteins R-HSA-5173214	1/38	0.842924	0.898602	0.54148	0.0925275	ADAMTSL2
Diseases Associated With O-glycosylation Of Proteins R-HSA-3906995	2/69	0.845893	0.900262	0.597739	0.100039	NOTCH2;ADAMTSL2
Interleukin-17 Signaling R-HSA-448424	2/69	0.845893	0.900262	0.597739	0.100039	PPP2R1A;NFKB1
Plasma Lipoprotein Assembly, Remodeling, And Clearance R-HSA-174824	2/71	0.857081	0.911114	0.580352	0.0895035	NCEH1;AP2M1
RNA Polymerase III Abortive And Retractive Initiation R-HSA-749476	1/40	0.857519	0.911114	0.513658	0.0789555	POU2F1
MTOR Signaling R-HSA-165159	1/41	0.8643	0.916029	0.50079	0.0730328	CAB39L
Sensory Perception Of Sweet, Bitter, And Umami (Glutamate) Taste R-HSA-9717207	1/41	0.8643	0.916029	0.50079	0.0730328	TAS2R46
Signaling By Retinoic Acid R-HSA-5362517	1/41	0.8643	0.916029	0.50079	0.0730328	PPARD
Potassium Channels R-HSA-1296071	3/102	0.868644	0.916778	0.606413	0.0853959	KCNV1;KCNS1;KCNQ2
Activation Of GABAB Receptors R-HSA-991365	1/42	0.870759	0.916778	0.48855	0.0676104	ADCY1
Gamma Carboxylation, Hypusine Formation And Arylsulfatase Activation R-HSA-163841	1/42	0.870759	0.916778	0.48855	0.0676104	GAS6
Glucagon-like Peptide-1 (GLP1) Regulates Insulin Secretion R-HSA-381676	1/42	0.870759	0.916778	0.48855	0.0676104	RAPGEF4
Kinesins R-HSA-983189	1/42	0.870759	0.916778	0.48855	0.0676104	KIF5C
RND1 GTPase Cycle R-HSA-9696273	1/42	0.870759	0.916778	0.48855	0.0676104	PIK3R1
RND3 GTPase Cycle R-HSA-9696264	1/42	0.870759	0.916778	0.48855	0.0676104	PIK3R1
tRNA Aminoacylation R-HSA-379724	1/42	0.870759	0.916778	0.48855	0.0676104	2001-03-01
DAP12 Interactions R-HSA-2172127	1/43	0.876911	0.920215	0.476893	0.0626399	PIK3R1
Defensins R-HSA-1461973	1/43	0.876911	0.920215	0.476893	0.0626399	CCR6
Retinoid Metabolism And Transport R-HSA-975634	1/43	0.876911	0.920215	0.476893	0.0626399	AKR1B10
Smooth Muscle Contraction R-HSA-445355	1/43	0.876911	0.920215	0.476893	0.0626399	SORBS3
Interleukin-12 Signaling R-HSA-9020591	1/44	0.88277	0.925602	0.465778	0.0580781	MTAP
Regulation Of Insulin Secretion R-HSA-422356	2/77	0.88633	0.927808	0.533755	0.0644063	FFAR1;RAPGEF4
Signaling By Insulin Receptor R-HSA-74752	2/77	0.88633	0.927808	0.533755	0.0644063	PIK3R1;FGFR1
Glycosphingolipid Metabolism R-HSA-1660662	1/45	0.888351	0.928761	0.455168	0.0538867	GM2A
Phase II - Conjugation Of Compounds R-HSA-156580	3/107	0.888697	0.928761	0.577106	0.0680979	GGT5;UGT2B28;GSTM5
Metabolism Of Fat-Soluble Vitamins R-HSA-6806667	1/47	0.898728	0.937708	0.435332	0.0464824	AKR1B10
Sensory Perception Of Taste R-HSA-9717189	1/47	0.898728	0.937708	0.435332	0.0464824	TAS2R46
Inositol Phosphate Metabolism R-HSA-1483249	1/48	0.90355	0.941968	0.426048	0.0432114	MTMR9
Diseases Of Metabolism R-HSA-5668914	8/247	0.90507	0.942781	0.668426	0.0666707	NOTCH2;CYP2U1;CBLIF;PAH;CYP11B1;PMM2;ADAMTSL2;SGSH
MyD88:MAL(TIRAP) Cascade Initiated On Plasma Membrane R-HSA-166058	3/112	0.905966	0.942944	0.550488	0.0543627	CASP8;PPP2R1A;NFKB1
TP53 Regulates Transcription Of Cell Cycle Genes R-HSA-6791312	1/49	0.908142	0.943952	0.41715	0.0401941	CNOT2
Peptide Ligand-Binding Receptors R-HSA-375276	6/196	0.908415	0.943952	0.63091	0.0606017	CD200R1;CCL22;PNOC;F2R;CCR6;CXCL16
Platelet Homeostasis R-HSA-418346	2/83	0.909946	0.944773	0.494062	0.0466248	NANOS2;PPP2R1A
Selenoamino Acid Metabolism R-HSA-2408522	3/114	0.912167	0.945133	0.540512	0.0496905	SECISBP2;TXNRD1;MARS1
Class A/1 (Rhodopsin-like Receptors) R-HSA-373076	11/327	0.912363	0.945133	0.694497	0.0636975	PTGFR;CD200R1;CCL22;P2RY14;PNOC;F2R;P2RY1;CCR6;FFAR1;PCDHA6;CXCL16
Chondroitin Sulfate/Dermatan Sulfate Metabolism R-HSA-1793185	1/50	0.912516	0.945133	0.408615	0.0374085	CHST11
Platelet Activation, Signaling And Aggregation R-HSA-76002	8/254	0.91978	0.951882	0.649164	0.0542839	ABCC4;F2R;GNA12;P2RY1;PRKCQ;PIK3R1;GAS6;RAPGEF4
Heparan Sulfate/Heparin (HS-GAG) Metabolism R-HSA-1638091	1/53	0.924428	0.955918	0.38498	0.0302516	SGSH
Synthesis Of DNA R-HSA-69239	3/119	0.926076	0.956845	0.517078	0.0397113	PSMD13;PSMD2;PSME1
Cell-Cell Communication R-HSA-1500931	3/120	0.928603	0.958679	0.512631	0.0379728	CTNNB1;PIK3R1;CD47
Amino Acids Regulate mTORC1 R-HSA-9639288	1/55	0.931455	0.958742	0.370683	0.026321	SESN1
Complement Cascade R-HSA-166658	1/55	0.931455	0.958742	0.370683	0.026321	MASP1
Signaling By ALK Fusions And Activated Point Mutants R-HSA-9725370	1/55	0.931455	0.958742	0.370683	0.026321	PIK3R1
Chaperonin-mediated Protein Folding R-HSA-390466	2/90	0.931671	0.958742	0.454593	0.032174	USP11;FBXO4
Class B/2 (Secretin Family Receptors) R-HSA-373080	2/92	0.936904	0.963349	0.444444	0.0289666	ADGRE2;WNT7B
Cell-cell Junction Organization R-HSA-421270	1/61	0.948856	0.974852	0.333509	0.0175085	CTNNB1
Visual Phototransduction R-HSA-2187338	2/98	0.950413	0.974999	0.416535	0.0211844	AKR1B10;PRKCQ
S Phase R-HSA-69242	4/161	0.950901	0.974999	0.508827	0.0256173	LIN37;PSMD13;PSMD2;PSME1
Signaling By BRAF And RAF1 Fusions R-HSA-6802952	1/62	0.951293	0.974999	0.328024	0.0163793	ZC3HAV1
GPCR Ligand Binding R-HSA-500792	15/458	0.953061	0.976026	0.673833	0.0323953	PTGFR;CCL22;P2RY14;WNT7B;F2R;TAS2R46;CXCL16;ADGRE2;CD200R1;GRM7;PNOC;P2RY1;CCR6;FFAR1;PCDHA6
Anti-inflammatory Response Favoring Leishmania Infection R-HSA-9662851	4/165	0.956952	0.979225	0.49608	0.0218283	GGT5;ADAM17;PRKX;ADCY1
Mitochondrial Protein Import R-HSA-1268020	1/65	0.957929	0.979438	0.312599	0.0134361	SLC25A12
SRP-dependent Cotranslational Protein Targeting To Membrane R-HSA-1799339	2/108	0.967005	0.987926	0.37704	0.0126503	SEC61A1;SSR1
Diseases Of Glycosylation R-HSA-3781865	3/143	0.968709	0.988874	0.427893	0.0136033	NOTCH2;PMM2;ADAMTSL2
Nonsense Mediated Decay (NMD) Enhanced By Exon Junction Complex (EJC) R-HSA-975957	2/112	0.972017	0.990989	0.363253	0.0103097	PPP2R1A;DCP1A
Signaling By ROBO Receptors R-HSA-376176	5/209	0.972673	0.990989	0.488796	0.013543	NRP1;PSMD13;DCC;PSMD2;PSME1
Major Pathway Of rRNA Processing In Nucleolus And Cytosol R-HSA-6791226	4/179	0.973112	0.990989	0.456056	0.0124301	NOP14;UTP6;WDR3;DNAJC5
G Alpha (S) Signaling Events R-HSA-418555	3/153	0.978422	0.993831	0.399155	0.00870742	ITGA5;ADCY1;PDE7A
rRNA Processing In Nucleus And Cytosol R-HSA-8868773	4/189	0.98096	0.993831	0.431175	0.0082888	NOP14;UTP6;WDR3;DNAJC5
Metabolism Of Water-Soluble Vitamins And Cofactors R-HSA-196849	2/122	0.981541	0.993831	0.332806	0.00620078	CBLIF;TPK1
Mitochondrial Translation Elongation R-HSA-5389840	1/82	0.981661	0.993831	0.24677	0.00456749	MRPS5
Mitochondrial Translation Initiation R-HSA-5368286	1/82	0.981661	0.993831	0.24677	0.00456749	MRPS5
Mitochondrial Translation Termination R-HSA-5419276	1/82	0.981661	0.993831	0.24677	0.00456749	MRPS5
Platelet Degranulation R-HSA-114608	2/125	0.983723	0.993831	0.324637	0.00532744	ABCC4;GAS6
Cell Junction Organization R-HSA-446728	1/86	0.984917	0.993831	0.235108	0.00357309	CTNNB1
Mitochondrial Translation R-HSA-5368287	1/88	0.986322	0.993831	0.229679	0.00316329	MRPS5
rRNA Processing R-HSA-72312	4/199	0.986607	0.993831	0.408847	0.00551255	UTP6;NOP14;WDR3;DNAJC5
Response To Elevated Platelet Cytosolic Ca2+ R-HSA-76005	2/130	0.986816	0.993831	0.311874	0.00413904	ABCC4;GAS6
Antimicrobial Peptides R-HSA-6803157	1/89	0.986974	0.993831	0.227057	0.00297702	CCR6
Regulation Of Expression Of SLITs And ROBOs R-HSA-9010553	3/167	0.987316	0.993831	0.364811	0.00465677	PSMD13;PSMD2;PSME1
ADORA2B Mediated Anti-Inflammatory Cytokine Production R-HSA-9660821	2/131	0.987362	0.993831	0.30944	0.00393561	PRKX;ADCY1
Selenocysteine Synthesis R-HSA-2408557	1/90	0.987596	0.993831	0.224494	0.00280213	SECISBP2
Keratinization R-HSA-6805567	4/208	0.990294	0.995761	0.390623	0.00380997	ST14;KRTAP4-9;IVL;KLK12
Metabolism Of Vitamins And Cofactors R-HSA-196854	3/186	0.993942	0.998641	0.326605	0.00198462	AKR1B10;CBLIF;TPK1
Citric Acid (TCA) Cycle And Respiratory Electron Transport R-HSA-1428517	2/163	0.996803	0.999991	0.247517	0.000792542	D2HGDH;PPARD
Translation R-HSA-72766	4/281	0.999383	0.999991	0.286565	0.000176943	SEC61A1;MARS1;SSR1;MRPS5
Cellular Response To Starvation R-HSA-9711097	1/153	0.99943	0.999991	0.13101	7.47013e-05	SESN1
Sensory Perception R-HSA-9709957	13/616	0.999824	0.999991	0.424436	7.47085e-05	TMC1;OR10H1;OR10H2;TAS2R46;CIB2;EPS8;AKR1B10;EPB41L1;DNAJC5;EPB41L3;PRKCQ;OR3A2;OR10A5
Expression And Translocation Of Olfactory Receptors R-HSA-9752946	4/393	0.99999	0.999991	0.20284	2.10217e-06	OR10H1;OR10H2;OR3A2;OR10A5
Olfactory Signaling Pathway R-HSA-381753	4/401	0.999991	0.999991	0.198668	1.7064e-06	OR10H1;OR10H2;OR3A2;OR10A5

## Sheet: WikiPathway
Term	Overlap	P-value	Adjusted p-value	Odds Ratio	Combined Score	Genes
Androgen Receptor Signaling WP138	14/87	5.75001e-05	0.0358226	3.88827	37.964	SMARCE1;UBE2I;NCOA3;RNF6;PIK3R1;ETV5;PIAS1;NCOR1;ZMIZ1;SIN3A;SP1;CTNNB1;KAT7;PATZ1
Notch Signaling WP61	10/54	0.000198612	0.0618675	4.59526	39.1707	NOTCH2;APH1A;ADAM17;NCOR1;APH1B;SNW1;PIK3R1;PSEN1;RBPJ;NFKB1
Ebola Virus Infection In Host WP4217	16/129	0.000410191	0.085183	2.87082	22.3892	TFAP2A;STAT1;PIK3R1;NFKB1;BST2;TIAM1;ADAM17;IRF3;REL;ITGA5;HLA-DOA;GAS6;HLA-DOB;EPS15;VPS39;RAB7A
mRNA Vaccine Activation Of Dendritic Cell And Induction IFN1 WP5187	4/10	0.000843809	0.11359	13.4207	94.9863	IRF3;TLR7;TNFRSF11A;MR1
IL18 Signaling WP4754	9/56	0.00120151	0.11359	3.86703	26.0026	CASP8;TICAM2;PARP1;SP1;CTNNB1;PIK3R1;CFLAR;NFKB1;NFATC4
Genes Associated With The Development Of Rheumatoid Arthritis WP5033	5/18	0.00122106	0.11359	7.74807	51.9743	BLK;CD40;CTLA4;IRF5;CCR6
Autosomal Recessive Osteopetrosis Pathways WP4788	4/11	0.00127629	0.11359	11.5029	76.6528	TNFSF11;TNFRSF11A;NFKB1;RAB7A
Androgen Receptor Network In Prostate Cancer WP2263	13/109	0.00198259	0.153137	2.73926	17.0474	ABCC4;SMARCC2;MMP1;STAT1;PXN;GAB1;ARID1A;NDRG1;CRKL;SMARCA4;CASP8;SP1;ATM
Head And Neck Squamous Cell Carcinoma WP4674	10/73	0.00228897	0.153137	3.20618	19.4925	NOTCH2;CASP8;SESN1;GAB1;REL;CTNNB1;PIK3R1;NFKB1;TGFBR2;FGFR1
TYROBP Causal Network In Microglia WP3945	9/62	0.00249728	0.153137	3.42817	20.5435	ABCC4;RGS1;IL10RA;CREB3L2;LOXL3;SLC1A5;TMEM106A;ZFP36L2;CXCL16
Hair Follicle Development Cytodifferentiation Stage 3 Of 3 WP2840	11/87	0.00270385	0.153137	2.92464	17.2936	NOTCH2;SFRP1;ADAM17;IGFBP5;CTNNB1;TCF4;MSX1;RBPJ;CD34;NFKB1;GLI2
Toll Like Receptor Signaling Related To MyD88 WP3858	6/31	0.0029993	0.155714	4.83686	28.0992	TICAM2;IRF3;REL;TLR7;TLR5;NFKB1
Abnormal Ca Handling And Effects On Muscle Contraction In DMD WP5343	4/14	0.00345367	0.16551	8.05074	45.6342	RYR1;DTNA;SSPN;CASQ1
Histone Modifications WP2369	9/66	0.00385033	0.17134	3.18692	17.718	KMT2E;H3C15;SETBP1;KMT2A;H3C13;H3C14;SETD1B;SMYD2;EZH1
Photodynamic Therapy Induced NF kB Survival Signaling WP3617	6/35	0.00562833	0.220062	4.16883	21.5943	CD40LG;MMP1;REL;CFLAR;NFKB1;BIRC3
Phosphatidyl Inositol Phosphate Pathway WP5411	7/46	0.00565167	0.220062	3.61848	18.7286	TPTE2;FIG4;MTMR2;INPP5E;PIP4K2A;PIP4K2B;MTM1
mRNA Processing WP411	13/125	0.00650113	0.230038	2.34596	11.8137	RNGTT;CPSF1;PRMT2;CELF1;CELF2;METTL3;SRRM1;NUDT21;PRPF6;PRPF3;HNRNPD;DHX38;SF3B1
Breast Cancer Pathway WP4262	15/154	0.00664637	0.230038	2.18263	10.943	NOTCH2;WNT5B;PARP1;NCOA3;WNT7B;PIK3R1;ESR1;DDB2;APC;SP1;TNFSF11;CTNNB1;PGR;ATM;FGFR1
Intracellular Trafficking Proteins Involved In CMT Neuropathy WP4856	5/27	0.00807496	0.264774	4.57624	22.0528	FIG4;MTMR2;SH3TC2;NDRG1;RAB7A
EGF EGFR Signaling WP437	15/159	0.00883791	0.269233	2.10628	9.95999	MAP3K3;STAT1;NCOA3;GAB1;ASAP1;PIK3R1;CRKL;EPS8;ATXN2;SP1;ABI1;ARHGEF1;MEF2D;EPS15;AP2M1
MYD88 Distinct Input Output Pathway WP3877	4/18	0.00907527	0.269233	5.74932	27.0345	TLR7;TLR10;TLR5;NFKB1
Aspirin And miRNAs WP4707	3/10	0.00997312	0.282421	8.61804	39.7107	ABCC4;NFKB1;PTGS1
NAD Metabolism Sirtuins And Aging WP3630	3/11	0.0132344	0.338902	7.54039	32.6117	PARP1;FOXO3;NFKB1
Inclusion Body Myositis WP5120	3/11	0.0132344	0.338902	7.54039	32.6117	MAPT;PSEN1;NFKB1
Ectoderm Differentiation WP2858	13/138	0.0143303	0.338902	2.10053	8.91756	TFAP2A;ABCC4;NUMA1;STX16;PAX6;ARHGAP15;PLCXD3;MAFB;SGSM3;CTNNB1;PDE7A;TRIM33;PPARD
Tumor Suppressor Activity Of SMARCB1 WP4204	5/31	0.0145414	0.338902	3.87139	16.3789	SMARCE1;SMARCC2;ARID1A;GLI2;SMARCA4
Toll Like Receptor Signaling WP75	10/95	0.0146876	0.338902	2.37359	10.0183	CD40;CASP8;TICAM2;IRF3;STAT1;IRF5;TLR7;TLR5;NFKB1;MAPK13
miRNA Regulation Of DNA Damage Response WP1530	8/69	0.0162379	0.342282	2.64369	10.8931	RAD52;CASP8;RRM2B;SESN1;TLK2;RAD17;ATM;DDB2
DNA Damage Response WP707	8/69	0.0162379	0.342282	2.64369	10.8931	RAD52;CASP8;RRM2B;SESN1;TLK2;RAD17;ATM;DDB2
Octadecanoid Formation From Linoleic Acid WP5324	3/12	0.0170317	0.342282	6.70222	27.296	CYP2C9;CYP2C8;PTGS1
Valproic Acid Pathway WP3871	3/12	0.0170317	0.342282	6.70222	27.296	CYP2C9;CYP2B6;IVD
Mammary Gland Development Pregnancy And Lactation Stage 3 Of 4 WP2817	5/33	0.0187948	0.352475	3.59448	14.2851	YY1;TNFSF11;PGR;TNFRSF11A;ESR1
TROP2 Regulatory Signaling WP5300	6/45	0.0189402	0.352475	3.09827	12.2892	STAT1;TACSTD2;CTNNB1;PIK3R1;ITGA5;NFKB1
TGF Beta Receptor Signaling In Skeletal Dysplasias WP4816	7/58	0.0194854	0.352475	2.76533	10.8901	STAT1;ADAMTSL2;CTNNB1;SMAD6;NFKB1;TGFBR2;SMAD7
Estradiol Regulation In Porto Sinusoidal Vascular Disease WP5235	2/5	0.0204777	0.352475	13.3945	52.0835	SP1;ESR1
Gastrin Signaling WP4659	11/115	0.0208961	0.352475	2.13408	8.25504	SP1;PXN;CTNNB1;PRKCQ;TCF4;PIK3R1;FOXO3;MEF2D;NFKB1;CD44;BIRC3
T Cell Modulation In Pancreatic Cancer WP5078	6/46	0.0209335	0.352475	3.02066	11.6791	CD40;CCL22;CD40LG;CTLA4;ICOS;CD276
LDL Influence On CD14 And TLR4 WP5272	4/23	0.021771	0.356929	4.23523	16.209	CREB3L2;REL;NFKB1;MAPK13
Novel Intracellular Components Of RIG I Like Receptor Pathway WP3865	7/60	0.0230855	0.368776	2.6607	10.027	CYLD;CASP8;SNW1;IRF3;CASP10;NFKB1;MAPK13
Extrafollicular And Follicular B Cell Activation By SARS CoV 2 WP5218	8/74	0.023842	0.371339	2.44277	9.12694	CD40;CD40LG;FCRL5;BTLA;TLR7;ICOS;BACH2;CD22
Osteoblast Differentiation And Related Diseases WP4787	11/118	0.0247635	0.376284	2.07392	7.67016	NOTCH2;WNT5B;STAT1;WNT7B;CTNNB1;PRKCQ;PIK3R1;RBPJ;FGFR1;GLI2;MAPK13
Chemokine Signaling WP3929	14/165	0.0258081	0.38282	1.87204	6.84616	CCL22;STAT1;PXN;PRKX;PIK3R1;ADCY1;FOXO3;CXCL14;NFKB1;CXCL16;CRKL;TIAM1;ELMO1;CCR6
Allograft Rejection WP2328	9/90	0.0270061	0.391274	2.23982	8.08953	CD40;CASP8;CD40LG;C7;STAT1;CTLA4;HLA-DOA;HLA-DOB;MICA
Hepatitis B Infection WP4666	13/151	0.0279132	0.395225	1.90135	6.80428	TICAM2;STAT1;PIK3R1;NFKB1;NFATC4;TGFBR2;DDB2;MAPK13;DDB1;CASP8;IRF3;CASP10;CREB3L2
IL5 Signaling WP127	5/37	0.0295758	0.396983	3.14451	11.0712	SPRED1;STAT1;PIK3R1;MAPT;FOXO3
IL2 Signaling WP49	5/37	0.0295758	0.396983	3.14451	11.0712	STAT1;PIK3R1;MAPT;FOXO3;CRKL
Brain Derived Neurotrophic Factor BDNF Signaling WP2380	12/137	0.0300993	0.396983	1.93689	6.78541	NSF;TIAM1;ADAM17;APC;STAT1;RASGRF1;CTNNB1;PIK3R1;MAPT;FOXO3;NFKB1;NFATC4
Corticotropin Releasing Hormone Signaling WP2355	9/92	0.0305861	0.396983	2.18561	7.62169	TFAP2A;PARP1;SP1;CYP11B1;CTNNB1;PRKCQ;TCF4;IVL;NFKB1
Copper Homeostasis WP3286	6/51	0.0330267	0.41991	2.68432	9.15472	ADAM17;APC;SP1;MAPT;FOXO3;SOD3
Neuroinflammation And Glutamatergic Signaling WP5083	12/140	0.0347646	0.424673	1.89119	6.35281	GRM7;GLS2;STAT1;IL10RA;SLC1A2;SLC1A4;ADCY1;NFKB1;GRIA4;SMAD7;TGFBR2;CAMKK2
Endoderm Differentiation WP2853	12/140	0.0347646	0.424673	1.89119	6.35281	SFRP1;APC;STAT1;SESN1;CTR9;CTNNB1;TCF4;WDFY2;RTF1;GRHL2;PIAS1;GLI2
Pathways Of Nucleic Acid Metabolism And Innate Immune Sensing WP4705	3/16	0.0376606	0.436694	4.63902	15.212	IRF3;RNASET2;ADAR
Kit Receptor Signaling WP304	6/53	0.0389121	0.436694	2.56983	8.34281	DOK1;STAT1;MAPT;PIK3R1;FOXO3;CRKL
Arachidonate Epoxygenase Epoxide Hydrolase WP678	2/7	0.0403656	0.436694	8.03586	25.7933	CYP2C9;CYP2C8
Epithelial To Mesenchymal Transition In Colorectal Cancer WP4239	13/160	0.0416842	0.436694	1.78409	5.66919	NOTCH2;NRP2;WNT5B;WNT7B;PIK3R1;RBPJ;TGFBR2;MAPK13;FMNL2;COL4A6;CTNNB1;ITGA5;MEF2D
Interactions Immune Cells And miRNAs In Tumor Microenvironment WP4559	4/28	0.0418076	0.436694	3.35201	10.6415	CTLA4;TLR7;NFKB1;TGFBR2
Angiotensin II Receptor Type 1 Pathway WP5036	4/28	0.0418076	0.436694	3.35201	10.6415	COL1A1;IL11RA;SP1;TGFBR2
IL19 Signaling WP5422	4/28	0.0418076	0.436694	3.35201	10.6415	COL1A1;MMP1;STAT1;NFKB1
8P23 1 Copy Number Variation Syndrome WP5346	6/54	0.0420891	0.436694	2.51615	7.9711	BLK;NUMA1;MTMR9;CTNNB1;TBX5;FCGR2B
TGF Beta Receptor Signaling WP560	6/54	0.0420891	0.436694	2.51615	7.9711	STAT1;CTNNB1;SMAD6;NFKB1;TGFBR2;SMAD7
Platelet Mediated Interactions W Vascular And Circulating Cells WP4462	3/17	0.04416	0.436694	4.30744	13.4389	CD40;CD40LG;TLR7
Regulation Of Wnt B Catenin Signaling Small Molecule Compounds WP3664	3/17	0.04416	0.436694	4.30744	13.4389	APC;CTNNB1;TCF4
Involvement Of Secretase In Neurodegenerative Diseases WP5372	3/17	0.04416	0.436694	4.30744	13.4389	STAT1;MAPT;LGMN
Apoptosis WP254	8/84	0.0458872	0.445208	2.12024	6.53366	CASP8;IRF3;CASP10;IRF5;PIK3R1;CFLAR;NFKB1;BIRC3
Splicing Factor NOVA Regulated Synaptic Proteins WP4148	5/42	0.0476426	0.445208	2.71886	8.27629	SNW1;EPB41L1;EPB41L2;EPB41L3;KCNQ2
TGF Beta Signaling Pathway WP366	11/132	0.0498115	0.445208	1.83261	5.49692	KLF11;UBE2I;SNW1;SP1;SIN3A;MMP1;PIK3R1;DCP1A;PIAS1;SMAD7;TGFBR2
Wnt Signaling And Pluripotency WP399	9/101	0.0507812	0.445208	1.97087	5.87364	WNT5B;APC;PPP2R1A;WNT7B;CTNNB1;PRKCQ;PPP2R3B;CD44;PPARD
Leptin Signaling WP2034	7/71	0.0511256	0.445208	2.20211	6.54792	STAT1;SP1;LEPR;REL;PIK3R1;ESR1;NFKB1
Fas Ligand Pathway And Stress Induction Of Heat Shock Proteins WP314	5/43	0.0518917	0.445208	2.64717	7.83192	CASP8;PARP1;CASP10;FAF1;CFLAR
Intestinal Microbiome On Anticoag Response Of Vit K Antagonists WP5273	2/8	0.0521548	0.445208	6.6962	19.7775	CYP2C9;PPARD
Transcription Factors Regulate miRNAs Cardiac Hypertrophy WP1559	2/8	0.0521548	0.445208	6.6962	19.7775	RASGRF1;NFKB1
Canonical NF kB Pathway WP4562	2/8	0.0521548	0.445208	6.6962	19.7775	REL;NFKB1
Regulation Of Actin Cytoskeleton WP51	12/150	0.0539869	0.445208	1.75322	5.11768	APC;F2R;PXN;GNA12;LIMK1;PIP4K2A;PIP4K2B;ARHGEF1;PIK3R1;WASF2;SSH1;FGFR1
Nucleotide Excision Repair WP4753	5/44	0.0563546	0.445208	2.57916	7.4179	DDB1;LIG1;ERCC3;ERCC5;DDB2
Integrated Cancer Pathway WP1971	5/44	0.0563546	0.445208	2.57916	7.4179	CASP8;POU2F1;MMP1;STAT1;ATM
Notch Signaling WP268	5/44	0.0563546	0.445208	2.57916	7.4179	NOTCH2;APH1A;ADAM17;APH1B;PSEN1
Circadian Rhythm Genes WP3594	15/201	0.0564726	0.445208	1.62705	4.67614	KDM5A;ZFHX3;KMT2A;METTL3;BHLHE41;NR1D2;NR1D1;ADCY1;CARTPT;TNFRSF11A;NCOR1;PER3;DBP;SIN3A;HNRNPD
Eicosanoid Metabolism Via Cyclooxygenases COX WP4719	4/31	0.0575253	0.445208	2.97909	8.50689	PTGFR;ACOX3;PTGS1;PPARD
NF1 Copy Number Variation Syndrome WP5366	9/104	0.0590927	0.445208	1.90833	5.39799	H3C15;UTP6;H3C13;EXOC7;H3C14;LIMK1;NF1;EXOC4;EZH1
DNA Repair Pathways Full Network WP4946	10/120	0.0595725	0.445208	1.83172	5.16648	DDB1;RAD52;MBD4;LIG1;PARP1;ERCC3;POLM;ATM;ERCC5;DDB2
Cytosolic DNA Sensing Pathway WP4655	7/74	0.0613924	0.445208	2.10318	5.86886	CYLD;CASP8;AIM2;IRF3;CASP10;ADAR;NFKB1
Burn Wound Healing WP5055	7/74	0.0613924	0.445208	2.10318	5.86886	COL1A1;AMBP;MMP1;HEXD;NFKB1;BRD4;FGFR1
Cytokine Cytokine Receptor Interaction WP5473	18/255	0.0614221	0.445208	1.53309	4.27728	CSF1R;CD40;CCL22;IL11RA;IL34;IL10RA;TNFRSF11A;CXCL14;CXCL16;TGFBR2;CD40LG;NFIC;LEPR;TNFSF11;TNFRSF17;TNFRSF14;CCR6;IL7R
Pregnane X Receptor Pathway WP2876	4/32	0.0633749	0.445208	2.87255	7.92446	ABCC4;CYP2C9;CYP2B6;NCOA3
Acetaminophen In Analgesia And Antipyresis WP5444	2/9	0.0649892	0.445208	5.7393	15.6886	KCNQ2;PTGS1
T Cell Receptor Signaling WP69	7/75	0.065075	0.445208	2.07214	5.66154	DBNL;REL;PRKCQ;PIK3R1;ICOS;NFKB1;CRKL
Hematopoietic SC Gene Regulation By GABP Alpha Beta Complex WP3657	3/20	0.0667033	0.445208	3.54674	9.60281	ATM;FOXO3;SMARCA4
Imatinib And Chronic Myeloid Leukemia WP3640	3/20	0.0667033	0.445208	3.54674	9.60281	CSF1R;SPRED2;FOXO3
Lung Pathology Of COVID 19 WP5146	3/20	0.0667033	0.445208	3.54674	9.60281	IRF3;TLR7;NFKB1
IL7 Signaling WP205	3/20	0.0667033	0.445208	3.54674	9.60281	STAT1;PIK3R1;IL7R
P53 Transcriptional Gene Network WP4963	8/91	0.0674135	0.445208	1.94071	5.23391	ALDH4A1;RRM2B;GLS2;SESN1;FUCA1;IRF5;ERCC5;DDB2
Modulators Of TCR Signaling And T Cell Activation WP5072	6/61	0.068824	0.445208	2.19511	5.87455	AGO1;REL;PRKCQ;PIK3R1;MEF2D;NFKB1
Non Genomic Actions Of 1 25 Dihydroxyvitamin D3 WP4341	7/76	0.0688883	0.445208	2.042	5.46291	CD40;CD40LG;STAT1;SP1;PRKCQ;NFKB1;MAPK13
Host Pathogen Interaction Of Human CoV Interferon Induction WP4880	4/33	0.0695239	0.445208	2.77335	7.39398	IRF3;STAT1;TLR7;NFKB1
FBXL10 Enhancement Of MAP ERK Signaling In DLBCL WP4553	4/33	0.0695239	0.445208	2.77335	7.39398	H3C15;H3C13;KDM2B;H3C14
Oxidative Stress Response WP408	4/33	0.0695239	0.445208	2.77335	7.39398	SP1;TXNRD1;SOD3;NFKB1
B Cell Receptor Signaling WP23	8/92	0.0709209	0.445208	1.9175	5.07407	BLK;KLF11;GAB1;REL;PIK3R1;NFKB1;CD22;CRKL
Selenium Metabolism And Selenoproteins WP28	5/47	0.0710235	0.445208	2.39456	6.33299	POU2F1;SP1;TXNRD1;SECISBP2;NFKB1
Macrophage Stimulating Protein MSP Signaling WP5353	9/108	0.071462	0.445208	1.83084	4.83083	PARP1;GAB1;CTNNB1;PIK3R1;SMAD6;NDRG1;NFKB1;CRKL;FGFR1
Thermogenesis WP4321	9/108	0.071462	0.445208	1.83084	4.83083	SMARCE1;KDM3A;SMARCC2;CREB3L2;ADCY1;ARID1A;SMARCA4;FGFR1;MAPK13
NRF2 Pathway WP2884	11/141	0.0727822	0.447789	1.70492	4.46738	ABCC4;SLC39A9;TXNRD1;SLC39A1;SLC39A14;SOD3;CES2;SLC39A3;GSTM5;TGFBR2;PPARD
DNA Damage Response Only ATM Dependent WP710	9/109	0.0747871	0.447789	1.81243	4.69984	WNT5B;APC;WNT7B;CCNG2;CTNNB1;ATM;PIK3R1;FOXO3;NFKB1
STING Pathway In Kawasaki Like Disease And COVID 19 WP4961	3/21	0.0751776	0.447789	3.34952	8.66824	IRF3;REL;NFKB1
Prostaglandin And Leukotriene Metabolism In Senescence WP5321	4/34	0.0759674	0.447789	2.68076	6.90953	GGT5;IGFBP5;ALOX15B;PTGS1
Cohesin Complex Cornelia De Lange Syndrome WP5117	4/34	0.0759674	0.447789	2.68076	6.90953	MAU2;STAG3;APC;PPP2R1A
Microtubule Cytoskeleton Regulation WP2038	5/48	0.0763361	0.447789	2.33875	6.01668	TIAM1;SPRED1;APC;LIMK1;MAPT
Regulatory Circuits Of STAT3 Signaling WP4538	7/78	0.0769077	0.447789	1.98427	5.08996	PTPRD;CTF1;IL11RA;IL10RA;F2R;IL7R;MAPK13
Endometrial Cancer WP4155	6/63	0.0779225	0.449497	2.11786	5.40487	APC;CTNNB1;PIK3R1;FOXO3;DDB2;FGFR1
SARS CoV 2 And COVID 19 Pathway WP4846	2/10	0.0787432	0.450064	5.02162	12.7628	NRP1;TLR7
Phosphoinositides Metabolism WP4971	5/49	0.0818571	0.463609	2.28547	5.72004	MTMR2;PIP4K2A;MTMR9;PIP4K2B;MTM1
Clock Controlled Autophagy In Bone Metabolism WP5205	7/80	0.0854493	0.478694	1.92971	4.74675	VCP;CTF1;BHLHE41;TNFSF11;NR1D2;TNFRSF11A;ARHGAP4
RANKL RANK Signaling WP2018	5/50	0.0875841	0.478694	2.23457	5.44152	STAT1;TNFSF11;PIK3R1;TNFRSF11A;NFKB1
Pathways Affected In Adenoid Cystic Carcinoma WP3651	6/65	0.0876648	0.478694	2.04586	4.98009	SMARCE1;NCOR1;ATRX;ATM;ARID1A;FOXO3
Zinc Homeostasis WP3529	4/36	0.0897139	0.478694	2.51295	6.05905	SLC39A9;SLC39A1;SLC39A14;SLC39A3
DNA IR Damage And Cellular Response Via ATR WP4016	7/81	0.0899149	0.478694	1.90353	4.58539	RAD52;SMARCC2;PARP1;SP1;RAD17;ATM;TOPBP1
Cancer Pathways WP5434	31/507	0.0907793	0.478694	1.31627	3.15816	NOTCH2;CSF1R;ADCY1;PIK3R1;GLI2;CRKL;CASP8;GNA12;WNT5B;STAT1;DCC;MMP1;WNT7B;TXNRD1;NCOA3;F2R;ESR1;NFKB1;DDB2;RUNX1;TGFBR2;APC;SP1;COL4A6;CTNNB1;ARHGEF1;IL7R;GSTM5;PPARD;BIRC3;FGFR1
SARS CoV 2 Innate Immunity Evasion And Cell Immune Response WP5039	6/66	0.0927746	0.478694	2.01165	4.78287	TFAP2A;CASP8;IRF3;STAT1;TLR7;NFKB1
Induction Of Autophagy And TLR Signaling By Graphene Oxide WP5336	2/11	0.0933007	0.478694	4.46343	10.5869	IRF3;NFKB1
Neolacto Series Sphingolipid Metabolism WP5302	2/11	0.0933007	0.478694	4.46343	10.5869	FUCA1;ST3GAL4
PTF1A Related Regulatory Pathway WP4147	2/11	0.0933007	0.478694	4.46343	10.5869	CTNNB1;RBPJ
Estrogen Signaling WP712	3/23	0.0934493	0.478694	3.01426	7.1448	SP1;ESR1;NFKB1
Adipogenesis WP236	10/131	0.0942106	0.478694	1.66423	3.93129	KLF7;NCOR1;WNT5B;SP1;CELF1;STAT1;CTNNB1;MEF2D;LPIN2;PPARD
Glioblastoma Signaling WP2261	7/82	0.0945094	0.478694	1.87805	4.43042	GAB1;NF1;PRKCQ;ATM;PIK3R1;FOXO3;FGFR1
Genetic Causes Of Porto Sinusoidal Vascular Disease WP5269	4/37	0.0970034	0.483465	2.43667	5.68478	SP1;RBPJ;ESR1;NFKB1
miRNA Role In Immune Response In Sepsis WP4329	4/37	0.0970034	0.483465	2.43667	5.68478	REL;IRF5;TLR7;NFKB1
miRNA Regulation Of P53 Pathway In Prostate Cancer WP3982	3/24	0.103204	0.499576	2.87057	6.51921	CASP8;ATM;DDB2
Urea Cycle And Associated Pathways WP4595	3/24	0.103204	0.499576	2.87057	6.51921	ALDH4A1;GLS2;SLC25A12
TNF Related Weak Inducer Of Apoptosis TWEAK Signaling WP2036	4/38	0.10456	0.499576	2.36488	5.33988	CASP8;CTNNB1;NFKB1;BIRC3
Nuclear Receptors WP170	4/38	0.10456	0.499576	2.36488	5.33988	NR1D2;PGR;ESR1;PPARD
NRP1 Triggered Signaling In Pancreatic Cancer WP5144	5/53	0.105971	0.499576	2.09458	4.70147	COL1A1;NRP1;REL;NFKB1;TGFBR2
Vitamin D Receptor Pathway WP2877	13/186	0.106224	0.499576	1.51388	3.39442	CD40;IGFBP5;CYP2C9;SFRP1;CYP2B6;DUSP10;PNOC;BTLA;TNFSF11;CTLA4;PRKCQ;IRF5;PPARD
Neural Crest Differentiation WP2064	8/101	0.107388	0.499576	1.73111	3.86264	NOTCH2;TFAP2A;CTNNB1;TCF4;MSX1;RBPJ;NFKB1;FGFR1
Nanoparticle Triggered Regulated Necrosis WP2513	2/12	0.108555	0.499576	4.01688	8.91949	CASP8;PARP1
Biomarkers For Urea Cycle Disorders WP4583	2/12	0.108555	0.499576	4.01688	8.91949	GATM;GLS2
IL10 Anti Inflammatory Signaling WP4495	2/12	0.108555	0.499576	4.01688	8.91949	STAT1;IL10RA
Acute Viral Myocarditis WP4298	7/85	0.109057	0.499576	1.80553	4.00085	CASP8;CD40LG;PARP1;STAT1;PIK3R1;TLR5;MICA
Ovarian Infertility WP34	4/39	0.112376	0.503824	2.29719	5.02145	NCOR1;PGR;ATM;ZP2
Interferon Type I Signaling WP585	5/54	0.112489	0.503824	2.05172	4.48281	STAT1;REL;PIK3R1;CRKL;PIAS1
Nuclear Receptors Meta Pathway WP2882	20/314	0.112907	0.503824	1.37196	2.9925	ABCC4;NCOA3;TSC22D3;TXNRD1;SERPINB9;SLC39A14;ESR1;SOD3;TGFBR2;CYP2C9;AKAP13;CYP2B6;SLC39A9;SP1;SLC39A1;CES2;GSTM5;PPARD;SLC39A3;BIRC3
Measles Virus Infection WP4630	10/136	0.113219	0.503824	1.59777	3.48064	CASP8;IRF3;STAT1;EIF2AK1;ADAR;TLR7;PIK3R1;FCGR2B;NFKB1;SLAMF1
PDGF Pathway WP2526	4/40	0.120442	0.513277	2.23326	4.7269	TIAM1;STAT1;PIK3R1;NFKB1
Cell Interactions Of The Pancreatic Cancer Microenvironment WP5284	3/26	0.123836	0.513277	2.62068	5.47407	NRP1;CSF1R;CTLA4
Wnt Beta Catenin Signaling In Leukemia WP3658	3/26	0.123836	0.513277	2.62068	5.47407	APC;CTNNB1;PPARD
VEGFA VEGFR2 Signaling WP3888	26/430	0.124174	0.513277	1.29869	2.70916	NRP2;FAF1;PXN;PTPRJ;PIK3R1;FOXO3;NDRG1;HERPUD1;CAMKK2;EPS15;VPS39;BRD4;STAT1;LIMK1;GAB1;PRRC2C;MICAL2;PDE4DIP;PDIA6;NFKB1;DOK1;CYP2C8;TFCP2;TXNIP;CTNNB1;TPP1
ncRNAs Involved In STAT3 Signaling In Hepatocellular Carcinoma WP4337	2/13	0.124406	0.513277	3.65152	7.61051	IL11RA;NFKB1
BMP2 WNT4 FOXO1 Pathway Primary Endometrial Stromal Cell Diff WP3876	2/13	0.124406	0.513277	3.65152	7.61051	SFRP1;CTNNB1
Mammary Gland Development Pathway Puberty Stage 2 Of 4 WP2814	2/13	0.124406	0.513277	3.65152	7.61051	PGR;ESR1
Ganglio Series Sphingolipid Metabolism WP5299	2/13	0.124406	0.513277	3.65152	7.61051	ST8SIA1;ST3GAL4
Ganglio Sphingolipid Metabolism WP1423	2/13	0.124406	0.513277	3.65152	7.61051	ST8SIA1;SLC33A1
Estrogen Receptor Pathway WP2881	2/13	0.124406	0.513277	3.65152	7.61051	SP1;ESR1
Homologous Recombination WP186	2/13	0.124406	0.513277	3.65152	7.61051	RAD52;ATM
Apoptosis Modulation And Signaling WP1772	7/89	0.130186	0.530104	1.71709	3.5008	BLK;CASP8;CASP10;BMF;CFLAR;NFKB1;BIRC3
TNF Alpha Signaling WP231	7/89	0.130186	0.530104	1.71709	3.5008	MAP3K3;CASP8;PSMD2;REL;CFLAR;NFKB1;BIRC3
Chromosomal And Microsatellite Instability In Colorectal Cancer WP4216	6/73	0.132822	0.531761	1.80082	3.6354	APC;DCC;REL;CTNNB1;DDB2;TGFBR2
MECP2 And Associated Rett Syndrome WP3584	6/73	0.132822	0.531761	1.80082	3.6354	MPP1;NCOR1;SIN3A;SP1;NF1;GRIA4
Neurogenesis Regulation In The Olfactory Epithelium WP5265	5/57	0.133154	0.531761	1.93305	3.89751	PLXND1;PAX6;TCF4;MAPT;PSEN1
Canonical And Non Canonical Notch Signaling WP3845	3/27	0.134667	0.534381	2.51135	5.03513	NOTCH2;PSEN1;RBPJ
Affected Pathways In Duchenne Muscular Dystrophy WP5356	6/74	0.139124	0.54402	1.77424	3.49949	RYR1;DTNA;SSPN;CASQ1;NFKB1;TGFBR2
Regulation Sister Chromatid Sep At Meta-Anaphase Transition WP4240	2/14	0.140764	0.54402	3.34705	6.56246	APC;BUB3
Cancer Immunotherapy By CTLA4 Blockade WP4582	2/14	0.140764	0.54402	3.34705	6.56246	CTLA4;PIK3R1
Osteoblast Signaling WP322	2/14	0.140764	0.54402	3.34705	6.56246	COL1A1;TNFSF11
G Protein Signaling WP35	7/91	0.141463	0.54402	1.67603	3.27785	AKAP13;AKAP10;GNA12;ARHGEF1;PRKCQ;ADCY1;PDE7A
Ciliary Landscape WP4352	14/215	0.145034	0.544822	1.40263	2.70818	TFAP2A;RNGTT;EXOC7;PSMD13;COPS7A;NFKB1;TBC1D4;RABEP2;APC;WNK1;EXOC4;BBS9;CTNNB1;MAPRE2
Nucleotide Excision Repair In Xeroderma Pigmentosum WP5114	6/75	0.145563	0.544822	1.74843	3.36949	DDB1;PARP1;LIG1;ERCC3;UVSSA;DDB2
Nanoparticle Mediated Activation Of Receptor Signaling WP2643	3/28	0.145811	0.544822	2.41077	4.64181	COL1A1;PXN;MAPK13
Eicosanoid Metabolism Via Lipooxygenases LOX WP4721	3/28	0.145811	0.544822	2.41077	4.64181	GGT5;ACOX3;PPARD
Fibrin Complement Receptor 3 Signaling WP4136	4/43	0.146044	0.544822	2.06115	3.96534	TICAM2;IRF3;REL;NFKB1
Joubert Syndrome WP4656	6/76	0.152135	0.545278	1.72337	3.24507	NIN;PARP1;KIAA0586;INPP5E;BBS9;ATM
Male Infertility WP4673	10/145	0.152415	0.545278	1.49054	2.80394	PIWIL4;KDM3A;PRM1;PARP1;CXXC1;ATM;ESR1;SOD3;ETV5;PUM2
Network Map Of SARS CoV 2 Signaling WP5115	16/254	0.153628	0.545278	1.35404	2.53642	TLE3;NEK9;CCL22;STAT1;IL16;CXCL16;PIAS1;TGFBR2;BST2;CASP8;OS9;IRF3;INTS4;PRKCQ;CCR6;APOL1
Perturbations Host Cell Autophagy Induced By SARS CoV 2 Prots WP4936	4/44	0.155013	0.545278	2.00951	3.74623	PKM;NBR1;VPS39;RAB7A
IL11 Signaling WP2332	4/44	0.155013	0.545278	2.00951	3.74623	IL11RA;STAT1;PIK3R1;PIAS1
Extracellular Vesicle Mediated Signaling In Recipient Cells WP2870	3/29	0.157242	0.545278	2.31793	4.2881	APC;CTNNB1;TGFBR2
Cannabinoid Receptor Signaling WP3869	3/29	0.157242	0.545278	2.31793	4.2881	CYP2C9;ADCY1;MAPK13
Kleefstra Syndrome WP5351	3/29	0.157242	0.545278	2.31793	4.2881	SMARCC2;ARID1A;SMARCA4
Mammary Gland Development Pathway Embryonic Development Stg 1/4 WP2813	2/15	0.157544	0.545278	3.08942	5.7094	SFRP1;NRG3
PGK1 PKM2 KHKC KHKA Acting As Protein Kinases WP5433	2/15	0.157544	0.545278	3.08942	5.7094	PKM;BUB3
Pro Survival Signaling Of Neuroprotectin D1 WP5182	2/15	0.157544	0.545278	3.08942	5.7094	CASP8;BIRC3
miRNAs Involved In DNA Damage Response WP1545	2/15	0.157544	0.545278	3.08942	5.7094	RAD52;ATM
OSX And miRNAs In Tooth Development WP3971	2/15	0.157544	0.545278	3.08942	5.7094	NOTCH2;CTNNB1
HDAC6 Interactions In The Central Nervous System WP5426	8/112	0.163437	0.562547	1.54712	2.80234	VCP;APC;SP1;PXN;CTNNB1;ELP3;MAPT;SMAD7
Small Cell Lung Cancer WP4658	7/95	0.165356	0.566026	1.59951	2.87857	CASP8;COL4A6;PIK3R1;FHIT;NFKB1;DDB2;BIRC3
Glycerophospholipid Biosynthetic Pathway WP2533	3/30	0.168938	0.566256	2.23196	3.96893	PTDSS1;AGPS;LPIN2
Inflammatory Response Pathway WP453	3/30	0.168938	0.566256	2.23196	3.96893	COL1A1;CD40;CD40LG
4P16 3 Copy Number Variation WP5365	3/30	0.168938	0.566256	2.23196	3.96893	GAB1;PIK3R1;CKAP5
T Cell Antigen Receptor TCR Pathway During Staph A. Infection WP3863	5/62	0.170982	0.566256	1.76302	3.11384	CD40LG;CTLA4;PRKCQ;ICOS;NFKB1
TAR Syndrome WP5362	5/62	0.170982	0.566256	1.76302	3.11384	AKAP10;ZFHX3;UBE2I;TNFRSF14;NFKB1
Interactome Of Polycomb Repressive Complex 2 PRC2 WP2916	2/16	0.17467	0.566256	2.8686	5.00528	BCLAF1;EZH1
Quercetin And Nf kB AP 1 Induced Apoptosis WP2435	2/16	0.17467	0.566256	2.8686	5.00528	MMP1;NFKB1
Osteoclast Signaling WP12	2/16	0.17467	0.566256	2.8686	5.00528	TNFSF11;TNFRSF11A
Hedgehog Signaling WP47	2/16	0.17467	0.566256	2.8686	5.00528	SIN3A;GLI2
Oxidation By Cytochrome P450 WP43	5/63	0.179004	0.566256	1.73253	2.98055	CYP2C9;CYP2C8;CYP2B6;CYP2U1;CYP11B1
Alzheimer 39 S Disease And miRNA Effects WP2059	16/261	0.179289	0.566256	1.31486	2.25993	WNT5B;PSMD13;WNT7B;PIK3R1;PSEN1;ATG14;NFKB1;APH1A;ADAM17;APH1B;CASP8;APC;KIF5C;PSMD2;CTNNB1;MAPT
Alzheimer 39 S Disease WP5124	16/261	0.179289	0.566256	1.31486	2.25993	WNT5B;PSMD13;WNT7B;PIK3R1;PSEN1;ATG14;NFKB1;APH1A;ADAM17;APH1B;CASP8;APC;KIF5C;PSMD2;CTNNB1;MAPT
Antiviral And Anti-Inflam Effects Of Nrf2 On SARS CoV 2 Pathway WP5113	3/31	0.180875	0.566256	2.15213	3.68004	IRF3;MMP1;NFKB1
Type I Interferon Induction And Signaling SARS CoV 2 Infection WP4868	3/31	0.180875	0.566256	2.15213	3.68004	IRF3;STAT1;TLR7
Prostaglandin And Leukotriene Metabolism In Senescence WP5122	3/31	0.180875	0.566256	2.15213	3.68004	IGFBP5;ALOX15B;PTGS1
Constitutive Androstane Receptor Pathway WP2875	3/31	0.180875	0.566256	2.15213	3.68004	CYP2C9;CYP2B6;SP1
Base Excision Repair WP4752	3/31	0.180875	0.566256	2.15213	3.68004	MBD4;PARP1;LIG1
Degradation Pathway Of Sphingolipids Including Diseases WP4153	2/17	0.192072	0.578162	2.67722	4.4171	GM2A;GBA1
IL9 Signaling WP22	2/17	0.192072	0.578162	2.67722	4.4171	STAT1;PIK3R1
Embryonic Stem Cell Pluripotency Pathways WP3931	8/117	0.192645	0.578162	1.47576	2.43044	WNT5B;APC;WNT7B;GAB1;CTNNB1;SMAD6;SMAD7;FGFR1
Omega 6 Fatty Acids In Senescence WP5424	4/48	0.19278	0.578162	1.82645	3.00671	GGT5;ABCC4;ALOX15B;PTGS1
Initiation Of Transcription And Translation Elongation HIV1 LTR WP3414	3/32	0.19303	0.578162	2.07781	3.41782	SP1;NFKB1;NFATC4
Hair Follicle Development Organogenesis Part 2 Of 3 WP2839	3/32	0.19303	0.578162	2.07781	3.41782	CTNNB1;NFKB1;GLI2
2Q11 2 Copy Number Variation Syndrome WP5221	3/32	0.19303	0.578162	2.07781	3.41782	SNRNP200;ZP2;CNNM4
13Q12 12 Copy Number Variation WP5406	3/32	0.19303	0.578162	2.07781	3.41782	DTNA;SSPN;C1QTNF9B
Prion Disease Pathway WP3995	3/32	0.19303	0.578162	2.07781	3.41782	RFX5;NFKB1;FGFR1
Hepatitis C And Hepatocellular Carcinoma WP3646	4/49	0.202639	0.603547	1.78576	2.85067	MMP1;CD44;NFKB1;BIRC3
Nuclear Receptors In Lipid Metabolism And Toxicity WP299	3/33	0.205381	0.603547	2.00845	3.17915	CYP2C9;CYP2B6;PPARD
Type I Collagen Synthesis Osteogenesis Imperfecta WP4786	3/33	0.205381	0.603547	2.00845	3.17915	COL1A1;TNFSF11;TNFRSF11A
Mitochondrial Immune Response To SARS CoV 2 WP5038	3/33	0.205381	0.603547	2.00845	3.17915	IRF3;TLR7;NFKB1
MFAP5 Effect On Permeability And Motility Of Endothelial Cells WP4560	2/18	0.209684	0.608678	2.50976	3.92063	PXN;PRKCQ
Transcription Co Factors SKI And SKIL Protein Partners WP4533	2/18	0.209684	0.608678	2.50976	3.92063	SIN3A;NF1
1P36 Copy Number Variation Syndrome WP5345	7/102	0.211034	0.608678	1.48111	2.30421	INTS14;MXRA8;BTLA;INTS4;LRP4;TNFRSF14;ESR1
Prader Willi And Angelman Syndrome WP3998	7/102	0.211034	0.608678	1.48111	2.30421	GABRR3;NUP50;NUP62;TUBGCP6;NUP43;MSX1;NUP58
Wnt B Catenin Signaling Inhibitors Current Past Clinical Trials WP5442	1/5	0.216003	0.611506	5.01739	7.68896	CTNNB1
SARS CoV 2 Altering Angiogenesis Via NRP1 WP5065	1/5	0.216003	0.611506	5.01739	7.68896	NRP1
Proline And Hydroxyproline Pathways WP5026	1/5	0.216003	0.611506	5.01739	7.68896	ALDH4A1
Creatine Pathway WP5190	1/5	0.216003	0.611506	5.01739	7.68896	GATM
Hepatocyte Growth Factor Receptor Signaling WP313	3/34	0.217904	0.611506	1.94356	2.9614	PXN;GAB1;CRKL
Purinergic Signaling WP4900	3/34	0.217904	0.611506	1.94356	2.9614	P2RX5;P2RY14;P2RY1
RAC1 PAK1 P38 MMP2 Pathway WP3303	5/68	0.221054	0.614805	1.59461	2.40682	PXN;CTNNB1;PIK3R1;NFKB1;MAPK13
Acute Myeloid Leukemia WP5293	5/68	0.221054	0.614805	1.59461	2.40682	CSF1R;PIK3R1;NFKB1;RUNX1;PPARD
Apoptosis Modulation By HSP70 WP384	2/19	0.227447	0.621488	2.362	3.49774	CASP8;NFKB1
Mitochondrial Gene Expression WP391	2/19	0.227447	0.621488	2.362	3.49774	SP1;HCFC1
KCNQ2 Related Epilepsies WP5360	2/19	0.227447	0.621488	2.362	3.49774	P2RY1;KCNQ2
Glutathione Metabolism WP100	2/19	0.227447	0.621488	2.362	3.49774	GGT5;ANPEP
Th17 Cell Differentiation Pathway WP5130	5/69	0.229805	0.624571	1.56961	2.30815	STAT1;PRKCQ;NR1D1;NFKB1;RUNX1
P38 MAPK Signaling WP400	3/35	0.23058	0.624571	1.88272	2.76225	STAT1;RASGRF1;MEF2D
T Cell Activation SARS CoV 2 WP5098	6/88	0.239959	0.647163	1.47024	2.09845	CTLA4;PRKCQ;PIK3R1;FOXO3;ICOS;NFKB1
Wnt Signaling In Kidney Disease WP4150	3/36	0.243386	0.647569	1.82557	2.57973	WNT5B;WNT7B;CTNNB1
Apoptosis Related Network Due To Altered Notch3 Ovarian Cancer WP2864	4/53	0.243418	0.647569	1.63964	2.31678	F2R;IL7R;NFKB1;SMAD7
Pyrimidine Metabolism And Related Diseases WP4225	2/20	0.245307	0.647569	2.23066	3.13462	RRM2B;GLS2
Nanomaterial Induced Apoptosis WP2507	2/20	0.245307	0.647569	2.23066	3.13462	CASP8;CFLAR
Ether Lipid Biosynthesis WP5275	2/20	0.245307	0.647569	2.23066	3.13462	AGPS;LPIN2
Pancreatic Adenocarcinoma Pathway WP4263	6/89	0.247895	0.649894	1.45245	2.0258	TIAM1;STAT1;PIK3R1;NFKB1;TGFBR2;DDB2
Mesodermal Commitment Pathway WP2857	9/145	0.252276	0.649894	1.33014	1.83191	MACF1;SESN1;TCF4;PAX6;WDFY2;SMAD6;GRHL2;PIAS1;FGFR1
SCFA And Skeletal Muscle Substrate Metabolism WP4030	1/6	0.253252	0.649894	4.0137	5.51229	PPARD
Nicotine Metabolism In Liver Cells WP1600	1/6	0.253252	0.649894	4.0137	5.51229	CYP2B6
Metastatic Brain Tumor WP2249	1/6	0.253252	0.649894	4.0137	5.51229	PIK3R1
Pilocytic Astrocytoma WP2253	1/6	0.253252	0.649894	4.0137	5.51229	NF1
IL1 Signaling WP195	4/54	0.253892	0.649894	1.60677	2.20263	MAP3K3;REL;PIK3R1;NFKB1
Effect Of Progerin On Genes Involved In Progeria WP4320	3/37	0.256302	0.649894	1.77179	2.41211	H3C15;H3C13;H3C14
Thymic Stromal Lymphopoietin TSLP Signaling WP2203	3/37	0.256302	0.649894	1.77179	2.41211	STAT1;IL7R;NFKB1
Non Small Cell Lung Cancer WP4255	5/72	0.25662	0.649894	1.49909	2.03901	CASP8;PIK3R1;FOXO3;FHIT;DDB2
Host Pathogen Interaction Of Human CoVs Apoptosis WP4864	2/21	0.263215	0.6564	2.11315	2.82059	CASP8;MAPK13
7Q11 23 Distal Copy Number Variation WP5401	2/21	0.263215	0.6564	2.11315	2.82059	EPB41L3;ZP2
Tamoxifen Metabolism WP691	2/21	0.263215	0.6564	2.11315	2.82059	CYP2C9;CYP2C8
DNA IR Double Strand Breaks And Cellular Response Via ATM WP3959	4/55	0.264457	0.6564	1.57518	2.09511	RAD52;PARP1;RAD17;ATM
Hematopoietic SC Differentiation WP2849	4/55	0.264457	0.6564	1.57518	2.09511	IRF5;CD34;FLI1;RUNX1
CAMKK2 Pathway WP4874	7/110	0.268113	0.660548	1.36549	1.79746	GATM;PARP1;TMEM176B;ATP10D;MID1;TSPAN33;CAMKK2
Parkinson 39 S Disease Pathway WP2371	3/38	0.269308	0.660548	1.72107	2.25787	ATXN2;UBA7;MAPK13
G13 Signaling WP524	3/38	0.269308	0.660548	1.72107	2.25787	LIMK1;PIP4K2A;ARHGEF1
16P11 2 Proximal Deletion Syndrome WP4949	5/74	0.274896	0.667565	1.45549	1.87956	CASP8;PPP2R1A;REL;ESR1;NFKB1
Oncostatin M Signaling WP2374	4/56	0.2751	0.667565	1.5448	1.99375	STAT1;PXN;PIK3R1;NFKB1
lncRNA In Canonical Wnt Signaling And Colorectal Cancer WP4258	6/93	0.280327	0.667565	1.38537	1.76192	TFAP2A;SFRP1;WNT5B;APC;WNT7B;CTNNB1
Methionine De Novo And Salvage Pathway WP3580	2/22	0.281127	0.667565	2.00738	2.54727	IL4I1;MTAP
Immune Response To Tuberculosis WP4197	2/22	0.281127	0.667565	2.00738	2.54727	STAT1;PIAS1
Hippo YAP Signaling WP4537	2/22	0.281127	0.667565	2.00738	2.54727	TNIK;NDRG1
mRNA Protein And Metabolite Inducation Pathway By Cyclosporin A WP3953	1/7	0.288733	0.667565	3.34457	4.1548	SLC1A5
miRNA Targeting Cancer Growth And Vascularization Glioblastoma WP3593	1/7	0.288733	0.667565	3.34457	4.1548	HIF1AN
Amino Acid Metabolism In Triple Negative Breast Cancer Cells WP5213	1/7	0.288733	0.667565	3.34457	4.1548	SLC1A5
DDX1 As A Regulatory Component Of The Drosha Microprocessor WP2942	1/7	0.288733	0.667565	3.34457	4.1548	ATM
Activation Of NLRP3 Inflammasome By SARS CoV 2 WP4876	1/7	0.288733	0.667565	3.34457	4.1548	NFKB1
Hypothetical Craniofacial Development Pathway WP3655	1/7	0.288733	0.667565	3.34457	4.1548	TFAP2A
Nanomaterial Induced Inflammasome Activation WP3890	1/7	0.288733	0.667565	3.34457	4.1548	NFKB1
Hfe Effect On Hepcidin Production WP3924	1/7	0.288733	0.667565	3.34457	4.1548	SMAD7
LDLRAD4 And What We Know About It WP4904	1/7	0.288733	0.667565	3.34457	4.1548	TGFBR2
Primary Ovarian Insufficiency WP5316	10/170	0.289314	0.667565	1.25598	1.55773	NOTCH2;STAG3;PARP1;PMM2;ATM;WDR62;FOXO3;ESR1;SPIDR;TGFBR2
Wnt Signaling WP428	7/113	0.290529	0.667662	1.32664	1.63979	SFRP1;WNT5B;DAAM1;APC;WNT7B;CTNNB1;NFATC4
Catabolism Of Skeletal Muscle In Cachexia WP5474	3/40	0.295517	0.667662	1.62787	1.98442	REL;FOXO3;NFKB1
Glycogen Synthesis And Degradation WP500	3/40	0.295517	0.667662	1.62787	1.98442	PPP2R1A;PPP2R3B;PHKA2
Photodynamic Therapy Induced NFE2L2 NRF2 Survival Signaling WP3612	2/23	0.299001	0.667662	1.91169	2.308	ABCC4;MAPK13
Purine Metabolism And Related Disorders WP4224	2/23	0.299001	0.667662	1.91169	2.308	RRM2B;AMPD1
Cancer Immunotherapy By PD 1 Blockade WP4585	2/23	0.299001	0.667662	1.91169	2.308	NFKB1;NFATC4
Ebstein Barr Virus LMP1 Signaling WP262	2/23	0.299001	0.667662	1.91169	2.308	MAP3K3;NFKB1
Complement Activation WP545	2/23	0.299001	0.667662	1.91169	2.308	C7;MASP1
Eicosanoid Synthesis WP167	2/23	0.299001	0.667662	1.91169	2.308	ALOX15B;PTGS1
Physiological And Pathological Hypertrophy Of The Heart WP1528	2/24	0.316801	0.678839	1.8247	2.09746	CTF1;NFATC4
IL1 And Megakaryocytes In Obesity WP2865	2/24	0.316801	0.678839	1.8247	2.09746	F2R;NFKB1
Effects Of MFN2 Mutation WP5443	2/24	0.316801	0.678839	1.8247	2.09746	CASP8;RAB7A
Estrogen Metabolism WP5276	2/24	0.316801	0.678839	1.8247	2.09746	CYP2C9;CYP2C8
Kallmann Syndrome WP5074	2/24	0.316801	0.678839	1.8247	2.09746	PLXND1;FGFR1
Development Of Ureteric Derived Collecting System WP5053	4/60	0.318265	0.678839	1.43416	1.64193	CRIM1;CTNNB1;CELSR1;GLI2
10Q11 21Q11 23 Copy Number Variation Syndrome WP5352	4/60	0.318265	0.678839	1.43416	1.64193	SMARCC2;UVSSA;ERCC5;SF3B1
Primary Ovarian Insufficiency WP5461	8/136	0.319132	0.678839	1.25544	1.4339	NOTCH2;STAG3;PMM2;ATM;NUP43;WDR62;ESR1;SPIDR
Metabolic Reprogramming In Pancreatic Cancer WP5220	3/42	0.321867	0.678839	1.54423	1.75056	PKM;GLS2;SLC1A5
Glucose Metabolism In Triple Negative Breast Cancer Cells WP5211	1/8	0.32253	0.678839	2.86663	3.24375	PKM
NIPBL Role In DNA Damage Cornelia De Lange Syndrome WP5119	1/8	0.32253	0.678839	2.86663	3.24375	ATM
Insulin Signaling In Adipocytes Diabetic Condition WP3635	1/8	0.32253	0.678839	2.86663	3.24375	TBC1D4
Insulin Signaling In Adipocytes Normal Condition WP3634	1/8	0.32253	0.678839	2.86663	3.24375	TBC1D4
Cerebral Organic Acidurias Including Diseases WP4519	1/8	0.32253	0.678839	2.86663	3.24375	D2HGDH
Dual Hijack Model Of Vif In HIV Infection WP3300	1/8	0.32253	0.678839	2.86663	3.24375	RUNX1
ROS In COVID 19 Endothelial Dysfunction WP5258	1/8	0.32253	0.678839	2.86663	3.24375	NFKB1
Phase I Biotransformations Non P450 WP136	1/8	0.32253	0.678839	2.86663	3.24375	CES2
Hypothesized Pathways In Pathogenesis Of Cardiovascular Disease WP3668	2/25	0.334493	0.695795	1.74528	1.91132	LTBP2;TGFBR2
Relationship Between Inflammation COX 2 And EGFR WP4483	2/25	0.334493	0.695795	1.74528	1.91132	MMP1;ESR1
Inflammatory Bowel Disease Signaling WP5198	3/43	0.335054	0.695795	1.50554	1.64626	STAT1;TLR5;NFKB1
IL6 Signaling WP364	3/43	0.335054	0.695795	1.50554	1.64626	STAT1;GAB1;PIK3R1
17Q12 Copy Number Variation Syndrome WP5287	6/100	0.339022	0.699203	1.28173	1.38644	STARD3;LASP1;GGNBP2;PGAP3;PIP4K2B;MLLT6
DYRK1A Involvement Regarding Cell Prolif In Brain Development WP5180	4/62	0.340062	0.699203	1.38456	1.49342	APH1A;LIN37;MAPT;PSEN1
Proteasome Degradation WP183	4/62	0.340062	0.699203	1.38456	1.49342	UBA7;PSMD13;PSMD2;PSME1
Hippo Merlin Signaling Dysregulation WP4541	7/120	0.34425	0.699343	1.244	1.32658	DDB1;CSF1R;CTNNB1;ITGA5;VGLL4;CD44;FGFR1
Vasopressin Regulated Water Reabsorption WP5085	3/44	0.348228	0.699343	1.46875	1.54938	NSF;CREB3L2;AQP2
Heart Development WP1591	3/44	0.348228	0.699343	1.46875	1.54938	CTNNB1;TBX5;NFATC4
COVID 19 Structural Coverage Map WP5145	2/26	0.352048	0.699343	1.67247	1.74604	NRP1;AQR
SARS CoV 2 B 1 1 7 Variant Antagonises Innate Immune Activation WP5116	1/9	0.354723	0.699343	2.50817	2.59951	IRF3
Eicosanoid Metab Via Cytochrome P450 Monooxygenases Pathway WP4720	1/9	0.354723	0.699343	2.50817	2.59951	CYP2C8
Altered Glycosylation Of MUC1 In Tumor Microenvironment WP4480	1/9	0.354723	0.699343	2.50817	2.59951	NFKB1
Suppression Of HMGB1 Mediated Inflammation By THBD WP4479	1/9	0.354723	0.699343	2.50817	2.59951	NFKB1
Ethanol Metabolism Production Of ROS By CYP2E1 WP4269	1/9	0.354723	0.699343	2.50817	2.59951	SP1
15Q11 2 Copy Number Variation Syndrome WP4940	1/9	0.354723	0.699343	2.50817	2.59951	TUBGCP6
Urea Cycle And Related Diseases WP4571	1/9	0.354723	0.699343	2.50817	2.59951	GLS2
Nod Like Receptor NLR Signaling WP288	1/9	0.354723	0.699343	2.50817	2.59951	CD40
Thiamine Metabolic Pathways WP4297	1/9	0.354723	0.699343	2.50817	2.59951	TPK1
MicroRNAs In Cardiomyocyte Hypertrophy WP1544	5/83	0.35957	0.705007	1.28694	1.31634	CTF1;CTNNB1;PIK3R1;NFKB1;NFATC4
Prostaglandin Synthesis And Regulation WP98	3/45	0.361374	0.705007	1.4337	1.45928	PTGFR;ABCC4;PTGS1
Nephrotic Syndrome WP4758	3/45	0.361374	0.705007	1.4337	1.45928	PMM2;CTLA4;APOL1
EGFR Tyrosine Kinase Inhibitor Resistance WP4806	5/84	0.369097	0.705007	1.27058	1.26638	GAB1;NF1;PIK3R1;GAS6;FOXO3
FGFR3 Signal Chondrocyte Proliferation Terminal Differentiation WP4767	2/27	0.369438	0.705007	1.60549	1.5987	STAT1;MAPK13
Photodynamic Therapy Induced Unfolded Protein Response WP3613	2/27	0.369438	0.705007	1.60549	1.5987	EDEM1;PDIA6
1Q21 1 Copy Number Variation Syndrome WP4905	2/27	0.369438	0.705007	1.60549	1.5987	CTNNB1;NBPF12
Sphingolipid Metabolism Overview WP4725	2/27	0.369438	0.705007	1.60549	1.5987	SGMS1;GBA1
Gastric Cancer Network 1 WP2361	2/27	0.369438	0.705007	1.60549	1.5987	INO80D;APC
7Q11 23 Copy Number Variation Syndrome WP4932	6/104	0.373166	0.705007	1.22916	1.21162	NUP62;LIMK1;CTNNB1;SF3B1;FBLN5;BRD4
Aryl Hydrocarbon Receptor Pathway WP2586	3/46	0.374478	0.705007	1.40028	1.37539	NF1;ESR1;NFKB1
Ras Signaling WP4223	10/184	0.377318	0.705007	1.15407	1.12484	TIAM1;CSF1R;RASGRF1;NF1;REL;GAB1;PIK3R1;RGL1;NFKB1;FGFR1
Ciliopathies WP4803	10/184	0.377318	0.705007	1.15407	1.12484	GALNT11;NEK9;ODAD3;C2CD3;USP9X;KIAA0586;INPP5E;HYDIN;BBS9;GLI2
ncRNAs In Wnt Signaling In Hepatocellular Carcinoma WP4336	5/85	0.378625	0.705007	1.25463	1.21851	SFRP1;WNT5B;APC;WNT7B;CTNNB1
AGE RAGE Pathway WP2324	4/66	0.383716	0.705007	1.29496	1.24038	CASP8;STAT1;SP1;NFKB1
Interleukin 1 Induced Activation Of NF kB WP3656	1/10	0.385387	0.705007	2.22936	2.12571	NFKB1
Type III Interferon Signaling WP2113	1/10	0.385387	0.705007	2.22936	2.12571	STAT1
Non Homologous End Joining WP438	1/10	0.385387	0.705007	2.22936	2.12571	POLM
Liver X Receptor Pathway WP2874	1/10	0.385387	0.705007	2.22936	2.12571	CYP2B6
Leptin And Adiponectin WP3934	1/10	0.385387	0.705007	2.22936	2.12571	LEPR
Vitamin D Metabolism WP1531	1/10	0.385387	0.705007	2.22936	2.12571	GC
Interactions Of Natural Killer Cells In Pancreatic Cancer WP5092	2/28	0.38664	0.705007	1.54365	1.46687	ADAM17;MICA
T Cell Receptor And Co Stimulatory Signaling WP2583	2/28	0.38664	0.705007	1.54365	1.46687	CTLA4;NFKB1
TLR4 Signaling And Tolerance WP3851	2/28	0.38664	0.705007	1.54365	1.46687	IRF3;NFKB1
ATM Signaling In Development And Disease WP3878	3/47	0.387529	0.705007	1.36839	1.29718	ATM;NFKB1;MAPK13
Wnt Signaling WP363	3/47	0.387529	0.705007	1.36839	1.29718	APC;CTNNB1;TCF4
Selenium Micronutrient Network WP15	5/86	0.38815	0.705007	1.23908	1.17262	TXNRD1;SOD3;ALOX15B;NFKB1;PTGS1
Retinoblastoma Gene In Cancer WP2446	5/87	0.397665	0.714954	1.2239	1.12861	NPAT;PRMT2;SIN3A;FAF1;MAPK13
Pluripotent Stem Cell Differentiation Pathway WP2848	3/48	0.400512	0.714954	1.33791	1.2242	CSF1R;WNT7B;TNFSF11
Exercise Induced Circadian Regulation WP410	3/48	0.400512	0.714954	1.33791	1.2242	VAPA;NR1D2;HERPUD1
Energy Metabolism WP1541	3/48	0.400512	0.714954	1.33791	1.2242	FOXO3;MEF2D;PPARD
IL26 Signaling WP5347	3/48	0.400512	0.714954	1.33791	1.2242	STAT1;MMP1;TNFSF11
Rett Syndrome WP4312	3/48	0.400512	0.714954	1.33791	1.2242	NCOR1;TCF4;SMARCA4
PDGFR Beta Pathway WP3972	2/29	0.403633	0.71688	1.4864	1.34854	STAT1;PIK3R1
PPAR Signaling WP3942	4/68	0.405439	0.71688	1.25436	1.13242	MMP1;SLC27A6;ACOX3;PPARD
SMC1 SMC3 Role In DNA Damage Cornelia De Lange Syndrome WP5118	1/11	0.414596	0.71688	2.00632	1.76647	ATM
PAFAH1B1 Copy Number Variation WP5409	1/11	0.414596	0.71688	2.00632	1.76647	DCX
Glycolysis In Senescence WP5049	1/11	0.414596	0.71688	2.00632	1.76647	PKM
GABA Metabolism Aka GHB WP4157	1/11	0.414596	0.71688	2.00632	1.76647	GLS2
Glyoxylate Metabolism WP5166	1/11	0.414596	0.71688	2.00632	1.76647	ALDH4A1
Nucleotide GPCRs WP80	1/11	0.414596	0.71688	2.00632	1.76647	P2RY1
ATR Signaling WP3875	1/11	0.414596	0.71688	2.00632	1.76647	TOPBP1
Urotensin II Mediated Signaling WP5158	4/69	0.416247	0.71688	1.235	1.08244	COL1A1;IRF3;CTNNB1;NFKB1
Oligodendrocyte Differentiation Leading To Myelin For CNS WP4304	2/30	0.420397	0.71688	1.43324	1.24199	MOG;GLI2
Dopaminergic Neurogenesis WP2855	2/30	0.420397	0.71688	1.43324	1.24199	MSX1;GLI2
Sphingolipid Pathway WP1422	2/30	0.420397	0.71688	1.43324	1.24199	SGMS1;GBA1
Pleural Mesothelioma WP5087	22/437	0.420471	0.71688	1.06453	0.922284	CSF1R;MAP3K3;WNT5B;STAT1;WNT7B;IL34;NDRG1;NFKB1;HCFC1;YY1;SFRP1;APC;SP1;COL4A6;CTNNB1;ATM;TNIK;CD47;MEF2D;CD44;VGLL4;FGFR1
Photodynamic Therapy Induced AP 1 Survival Signaling WP3611	3/50	0.426232	0.71688	1.28084	1.09227	BMF;CFLAR;MAPK13
Osteoarthritic Chondrocyte Hypertrophy WP5373	3/50	0.426232	0.71688	1.28084	1.09227	COL1A1;NFKB1;FGFR1
IL4 Signaling WP395	3/50	0.426232	0.71688	1.28084	1.09227	STAT1;PIK3R1;NFKB1
Glucocorticoid Receptor Pathway WP2880	4/70	0.427011	0.71688	1.21622	1.03494	AKAP13;TSC22D3;SERPINB9;BIRC3
GPCRs Other WP117	5/91	0.435527	0.71688	1.16673	0.969783	ADGRE2;PTGFR;F2R;CELSR1;OR10A5
miRNA Regulation Of Prostate Cancer Signaling WP3981	2/31	0.436915	0.71688	1.38375	1.14576	CTNNB1;NFKB1
SARS Coronavirus And Innate Immunity WP4912	2/31	0.436915	0.71688	1.38375	1.14576	IRF3;STAT1
16P11 2 Distal Deletion Syndrome WP4950	2/31	0.436915	0.71688	1.38375	1.14576	ATXN2L;RABEP2
Gastric Cancer Network 2 WP2363	2/31	0.436915	0.71688	1.38375	1.14576	RAD17;CTNNB1
Synaptic Vesicle Pathway WP2267	3/51	0.438947	0.71688	1.25409	1.03259	NSF;ATP1A2;AP2M1
SRF And miRs In Smooth Muscle Differentiation And Proliferation WP1991	1/12	0.442418	0.71688	1.82383	1.48734	MEF2D
Complement Mediated Inflam Of Pulmonary Alveolus In COV19 WP5148	1/12	0.442418	0.71688	1.82383	1.48734	C7
MAPK And NFkB Signaling Inhibited By Yersinia YopJ WP3849	1/12	0.442418	0.71688	1.82383	1.48734	NFKB1
Bone Morphogenic Protein Signaling And Regulation WP1425	1/12	0.442418	0.71688	1.82383	1.48734	SMAD6
Enterohepatic Circulation Of Bile Acids WP5396	1/12	0.442418	0.71688	1.82383	1.48734	ABCC4
PtdIns 4 5 P2 In Cytokinesis Pathway WP5199	1/12	0.442418	0.71688	1.82383	1.48734	SEPTIN2
Gastric Acid Production WP2596	1/12	0.442418	0.71688	1.82383	1.48734	CBLIF
TGFB Smad Signaling WP5382	1/12	0.442418	0.71688	1.82383	1.48734	TGFBR2
Aerobic Glycolysis WP4629	1/12	0.442418	0.71688	1.82383	1.48734	PKM
Irinotecan Pathway WP229	1/12	0.442418	0.71688	1.82383	1.48734	CES2
Senescence Associated Secretory Phenotype SASP WP3391	6/113	0.449939	0.71688	1.12524	0.898662	H3C15;H2BC26;H3C13;H2AC7;H3C14;NFKB1
PI3K AKT mTOR Signaling And Therapeutic In Prostate Cancer WP3844	2/32	0.453174	0.71688	1.33755	1.05864	PIK3R1;FOXO3
Regucalcin In Proximal Tubule Epithelial Kidney Cells WP4838	2/32	0.453174	0.71688	1.33755	1.05864	CASP8;TNFSF11
Metabolic Pathways Of Fibroblasts WP5312	2/32	0.453174	0.71688	1.33755	1.05864	SLC1A5;FGFR1
White Fat Cell Differentiation WP4149	2/32	0.453174	0.71688	1.33755	1.05864	TLE3;IRF3
IL17 Signaling WP2112	2/32	0.453174	0.71688	1.33755	1.05864	SP1;NFKB1
Cardiac Progenitor Differentiation WP2406	3/53	0.464042	0.71688	1.2038	0.924255	ANPEP;PAX6;TBX5
Development Of Pulmonary Dendritic Cells And Macrophage Subsets WP3892	1/13	0.468919	0.71688	1.67176	1.26607	TCF4
MFAP5 Mediated Ovarian Cancer Cell Motility And Invasiveness WP3301	1/13	0.468919	0.71688	1.67176	1.26607	PRKCQ
Control Of Immune Tolerance By Vasoactive Intestinal Peptide WP4484	1/13	0.468919	0.71688	1.67176	1.26607	CTLA4
Cell Type Dependent Selectivity Of CCK2R Signaling WP3679	1/13	0.468919	0.71688	1.67176	1.26607	RYR1
EDA Signaling In Hair Follicle Development WP3930	1/13	0.468919	0.71688	1.67176	1.26607	EDARADD
Nitric Oxide Metabolism In Cystic Fibrosis WP4947	1/13	0.468919	0.71688	1.67176	1.26607	PRMT2
Lactate Shuttle In Glial Cells WP5314	1/13	0.468919	0.71688	1.67176	1.26607	SLC1A2
Leukotriene Metabolic Pathway WP5171	1/13	0.468919	0.71688	1.67176	1.26607	GGT5
Aerobic Glycolysis Augmented WP4628	1/13	0.468919	0.71688	1.67176	1.26607	PKM
Osteopontin Signaling WP1434	1/13	0.468919	0.71688	1.67176	1.26607	NFKB1
Vitamin B12 Disorders WP4271	1/13	0.468919	0.71688	1.67176	1.26607	CBLIF
Purine Metabolism WP4792	1/13	0.468919	0.71688	1.67176	1.26607	AMPD1
Cardiomyocyte Signaling Converging On Titin WP5344	2/33	0.469161	0.71688	1.29434	0.979566	NUP62;NBR1
Fluoropyrimidine Activity WP1601	2/33	0.469161	0.71688	1.29434	0.979566	ABCC4;CES2
Alpha 6 Beta 4 Signaling WP244	2/33	0.469161	0.71688	1.29434	0.979566	GAB1;PIK3R1
Tryptophan Metabolism WP465	2/33	0.469161	0.71688	1.29434	0.979566	IL4I1;STAT1
BDNF TrkB Signaling WP3676	2/33	0.469161	0.71688	1.29434	0.979566	GAB1;ADCY1
Prolactin Signaling WP2037	4/74	0.469482	0.71688	1.14648	0.866884	STAT1;PXN;PIK3R1;NFKB1
Complement System WP2806	5/95	0.472838	0.719773	1.11464	0.834867	FCER2;APCS;CD40;C7;MASP1
Focal Adhesion WP306	10/199	0.473687	0.719773	1.06163	0.793262	COL1A1;BLK;PXN;RASGRF1;COL4A6;CTNNB1;PIK3R1;ITGA5;CRKL;BIRC3
Vitamin B12 Metabolism WP1533	3/54	0.476404	0.72214	1.18014	0.875058	CBLIF;SOD3;NFKB1
Leukocyte Intrinsic Hippo Pathway Functions WP4542	2/34	0.484865	0.729532	1.25382	0.907625	FOXO3;NDRG1
Overlap Between Signal Transduction Pathways LMNA Laminopathies WP4879	3/55	0.488631	0.729532	1.15738	0.828854	APC;WNT7B;CTNNB1
Female Steroid Hormones In Cardiomyocyte Energy Metabolism WP5318	1/14	0.494162	0.729532	1.54308	1.08771	ESR1
Mod Of PI3K Akt mTOR Signaling By Bioactive Sphingolipids WP5192	1/14	0.494162	0.729532	1.54308	1.08771	NFKB1
H19 Rb E2F1 And CDK Beta Catenin In Colorectal Cancer WP3969	1/14	0.494162	0.729532	1.54308	1.08771	CTNNB1
Kennedy Pathway From Sphingolipids WP3933	1/14	0.494162	0.729532	1.54308	1.08771	PTDSS1
Codeine And Morphine Metabolism WP1604	1/14	0.494162	0.729532	1.54308	1.08771	CYP2C8
Sulfatase And Aromatase Pathway WP5368	1/14	0.494162	0.729532	1.54308	1.08771	ESR1
Mineralocorticoid Biosynthesis WP5279	1/14	0.494162	0.729532	1.54308	1.08771	CYP11B1
Glucocorticoid Biosynthesis WP5280	1/14	0.494162	0.729532	1.54308	1.08771	CYP11B1
6Q16 Copy Number Variation WP5400	1/14	0.494162	0.729532	1.54308	1.08771	LEPR
Influence Of Laminopathies On Wnt Signaling WP4844	2/35	0.500276	0.736813	1.21577	0.842034	APC;CTNNB1
MAPK Signaling WP382	12/246	0.504368	0.737083	1.0287	0.704094	DUSP10;RASGRF1;GNA12;NF1;CACNA2D4;MAPT;PTPN7;NFKB1;CRKL;FGFR1;TGFBR2;MAPK13
Metapathway Biotransformation Phase I And II WP702	9/183	0.505896	0.737083	1.03756	0.707018	CYP2C9;CYP2C8;CYP2B6;AKR1B10;CYP2U1;CHST11;CYP11B1;UGT2B28;GSTM5
N Glycan Biosynthesis WP5153	3/57	0.512657	0.737083	1.1144	0.744582	ST6GAL1;MGAT4A;PMM2
Host Pathogen Interaction Of Human Coronaviruses MAPK Signaling WP4877	2/36	0.515387	0.737083	1.17995	0.782112	BST2;MAPK13
Vitamin D Sensitive Calcium Signaling In Depression WP4698	2/36	0.515387	0.737083	1.17995	0.782112	KDM3A;KCNQ2
Factors And Pathways Affecting IGF1 Akt Signaling WP3850	2/36	0.515387	0.737083	1.17995	0.782112	IGFBP5;NFKB1
Biosynth Of Tetrahydrobiopterin And Phenylalanine Catabolism WP4156	1/15	0.518206	0.737083	1.43279	0.941889	PAH
RIOK1 And RIOK2 In EGFR And PI3K Mediated Tumorigenesis WP3873	1/15	0.518206	0.737083	1.43279	0.941889	FOXO3
Biomarkers For Pyrimidine Metabolism Disorders WP4584	1/15	0.518206	0.737083	1.43279	0.941889	RRM2B
GPCRs Class C Metabotropic Glutamate Pheromone WP501	1/15	0.518206	0.737083	1.43279	0.941889	GRM7
Omega 3 Omega 6 Fatty Acid Synthesis WP4723	1/15	0.518206	0.737083	1.43279	0.941889	ACOX3
Rubinstein Taybi Syndrome 1 WP5367	1/15	0.518206	0.737083	1.43279	0.941889	NCOA3
Biogenic Amine Synthesis WP550	1/15	0.518206	0.737083	1.43279	0.941889	PAH
FOXP3 In COVID 19 WP5063	1/15	0.518206	0.737083	1.43279	0.941889	IL7R
GPR40 Pathway WP3958	1/15	0.518206	0.737083	1.43279	0.941889	FFAR1
Thyroid Stimulating Hormone TSH Signaling WP2032	3/58	0.524443	0.742563	1.09408	0.706138	STAT1;GNA12;PIK3R1
Complement And Coagulation Cascades WP558	3/58	0.524443	0.742563	1.09408	0.706138	C7;F2R;MASP1
Photodynamic Therapy Induced HIF 1 Survival Signaling WP3614	2/37	0.530192	0.743941	1.14617	0.727265	PKM;HIF1AN
Melatonin Metabolism And Effects WP3298	2/37	0.530192	0.743941	1.14617	0.727265	PER3;NFKB1
Interferon Mediated Signaling WP4558	2/37	0.530192	0.743941	1.14617	0.727265	STAT1;PIK3R1
Neovascularization Processes WP4331	2/37	0.530192	0.743941	1.14617	0.727265	REL;NFKB1
Dengue 2 Interactions With Complement And Coagulation Cascades WP3896	3/59	0.53607	0.745819	1.07448	0.669931	C7;F2R;MASP1
MET In Type 1 Papillary Renal Cell Carcinoma WP4205	3/59	0.53607	0.745819	1.07448	0.669931	GAB1;PIK3R1;CRKL
Markers Of Kidney Cell Lineage WP5236	3/59	0.53607	0.745819	1.07448	0.669931	SFRP1;CTNNB1;TBX18
Classcl Pathway Steroidogenesis W Glucocort Mineralocort Metab WP4523	1/16	0.541108	0.745819	1.3372	0.821221	CYP11B1
Major Receptors Targeted By Epinephrine And Norepinephrine WP4589	1/16	0.541108	0.745819	1.3372	0.821221	ADCY1
Airway Smooth Muscle Cell Contraction WP4962	1/16	0.541108	0.745819	1.3372	0.821221	RYR1
2Q21 1 Copy Number Variation Syndrome WP5223	1/16	0.541108	0.745819	1.3372	0.821221	APC
NAD Metabolism WP3644	1/16	0.541108	0.745819	1.3372	0.821221	PARP1
Relevant Molecular Pathways And Targeted Agents In TNBC WP5215	2/38	0.544685	0.749093	1.11428	0.676975	PARP1;PIK3R1
Kisspeptin Kisspeptin Receptor System In The Ovary WP4871	2/39	0.558864	0.759093	1.0841	0.630785	PRKCQ;NFKB1
Cells And Molecules Involved In Acute Inflammatory Response WP4493	1/17	0.562923	0.759093	1.25356	0.720309	C7
MAP3K1 Role In Promoting And Blocking Gonadal Determination WP4872	1/17	0.562923	0.759093	1.25356	0.720309	CTNNB1
Canonical And Non Canonical TGF B Signaling WP3874	1/17	0.562923	0.759093	1.25356	0.720309	TGFBR2
miR 509 3P Alteration Of YAP1 ECM Axis WP3967	1/17	0.562923	0.759093	1.25356	0.720309	COL1A1
Drug Induction Of Bile Acid Pathway WP2289	1/17	0.562923	0.759093	1.25356	0.720309	ABCC4
Leptin Insulin Signaling Overlap WP3935	1/17	0.562923	0.759093	1.25356	0.720309	LEPR
Glycosaminoglycan Degradation WP4815	1/17	0.562923	0.759093	1.25356	0.720309	SGSH
NRXN1 Deletion Syndrome WP5398	1/17	0.562923	0.759093	1.25356	0.720309	GRIA4
10Q22Q23 Copy Number Variation WP5402	3/62	0.569952	0.765681	1.01969	0.573271	NRG3;TNFSF11;NFKB1
Complement System In Neuronal Development And Plasticity WP5090	5/106	0.570492	0.765681	0.992666	0.557139	CASP8;C7;CASP10;MASP1;GAS6
Oxidative Damage Response WP3941	2/40	0.572724	0.765681	1.05552	0.588294	NFKB1;MAPK13
Bladder Cancer WP2828	2/40	0.572724	0.765681	1.05552	0.588294	MMP1;PIK3R1
Overview Of Proinflammatory And Profibrotic Mediators WP5095	6/129	0.579459	0.770437	0.978038	0.533676	CTF1;CCL22;MMP1;CXCL14;NFKB1;CXCL16
Endochondral Ossification With Skeletal Dysplasias WP4808	3/63	0.580901	0.770437	1.00264	0.544609	CHST11;STAT1;FGFR1
Endochondral Ossification WP474	3/63	0.580901	0.770437	1.00264	0.544609	CHST11;STAT1;FGFR1
Congenital Generalized Lipodystrophy WP5101	1/18	0.583702	0.770437	1.17976	0.63514	LPIN2
Ulcerative Colitis Signaling WP5174	1/18	0.583702	0.770437	1.17976	0.63514	NFKB1
Nephrogenesis WP5052	1/18	0.583702	0.770437	1.17976	0.63514	NOTCH2
Nucleotide Binding Oligomerization Domain NOD Pathway WP1433	2/41	0.586265	0.770555	1.0284	0.549149	CASP8;AIM2
Common Pathways Underlying Drug Addiction WP2636	2/41	0.586265	0.770555	1.0284	0.549149	ADCY1;GRIA4
5Q35 Copy Number Variation WP5380	5/109	0.595467	0.775209	0.963879	0.499684	DOK3;SIMC1;GAB1;ANKS4B;PIK3R1
Metabolic Reprogramming In Colon Cancer WP4290	2/42	0.599485	0.775209	1.00264	0.513034	PKM;SLC1A5
Eukaryotic Transcription Initiation WP405	2/42	0.599485	0.775209	1.00264	0.513034	ERCC3;TAF6
Angiopoietin Like Protein 8 Regulatory Pathway WP3915	6/132	0.602027	0.775209	0.9546	0.484416	MAP3K3;CYP2B6;EXOC7;PIK3R1;FOXO3;MAPK13
Cell Lineage Map For Neuronal Differentiation WP5417	6/132	0.602027	0.775209	0.9546	0.484416	MOG;SLC1A2;DCX;PAX6;MSX1;CD34
Ferroptosis WP4313	3/65	0.602261	0.775209	0.970195	0.491951	TXNRD1;SLC1A5;SLC39A14
LTF Danger Signal Response Pathway WP4478	1/19	0.603494	0.775209	1.11416	0.562671	NFKB1
Overview Of Nanoparticle Effects WP3287	1/19	0.603494	0.775209	1.11416	0.562671	PTGS1
Small Ligand GPCRs WP247	1/19	0.603494	0.775209	1.11416	0.562671	PTGFR
TP53 Network WP1742	1/19	0.603494	0.775209	1.11416	0.562671	ATM
Cholestasis WP5238	1/19	0.603494	0.775209	1.11416	0.562671	ABCC4
Bardet Biedl Syndrome WP5234	4/88	0.606715	0.777744	0.954696	0.477058	USP9X;INPP5E;BBS9;GLI2
Physico Chemical Features And Toxicity Associated Pathways WP3680	3/66	0.612668	0.781831	0.954744	0.46776	DAAM1;APC;CTNNB1
Myometrial Relaxation And Contraction Pathways WP289	7/156	0.614979	0.781831	0.94164	0.457794	RYR1;IGFBP5;RGS1;SP1;PRKCQ;ADCY1;NFKB1
Ca Mediated T Cell Apoptosis Inclusion Body Myositis WP5142	1/20	0.622345	0.781831	1.05546	0.500562	MEF2D
Serotonin Receptor 2 And ELK SRF GATA4 Signaling WP732	1/20	0.622345	0.781831	1.05546	0.500562	RASGRF1
Autophagy In Pancreatic Ductal Adenocarcinoma WP5331	1/20	0.622345	0.781831	1.05546	0.500562	NFKB1
15Q13 3 Copy Number Variation Syndrome WP4942	1/20	0.622345	0.781831	1.05546	0.500562	KLF13
Cell Differentiation Expanded Index WP2023	1/20	0.622345	0.781831	1.05546	0.500562	MEF2D
BMP Signaling In Eyelid Development WP3927	1/20	0.622345	0.781831	1.05546	0.500562	SFRP1
AMP Activated Protein Kinase Signaling WP1403	3/67	0.62289	0.781831	0.939777	0.444876	LEPR;PIK3R1;CAMKK2
ErbB Signaling WP673	4/90	0.624476	0.781831	0.932396	0.439011	NRG3;GAB1;PIK3R1;CRKL
Renin Angiotensin Aldosterone System RAAS WP4756	2/44	0.624963	0.781831	0.954792	0.448813	CAMK1D;CREB3L2
Genes Controlling Nephrogenesis WP4823	2/44	0.624963	0.781831	0.954792	0.448813	NOTCH2;CTNNB1
Melanoma WP4685	3/68	0.632927	0.786737	0.92527	0.423219	NF1;PIK3R1;DDB2
15Q25 Copy Number Variation WP5408	2/45	0.637222	0.786737	0.932539	0.420236	RYR1;AP3M2
Metabolism Of Sphingolipids In ER And Golgi Apparatus WP4142	1/21	0.640302	0.786737	1.00263	0.44699	SGMS1
Urea Cycle And Metabolism Of Amino Groups WP497	1/21	0.640302	0.786737	1.00263	0.44699	GATM
GNAQ Pathways In Port Wine Stain WP5437	1/21	0.640302	0.786737	1.00263	0.44699	NFKB1
Glycosphingolipid Metabolism WP5292	1/21	0.640302	0.786737	1.00263	0.44699	GBA1
Type II Diabetes Mellitus WP1584	1/21	0.640302	0.786737	1.00263	0.44699	PHKA2
FOXA2 Pathway WP5066	1/21	0.640302	0.786737	1.00263	0.44699	ABCC4
Insulin Signaling WP481	7/160	0.641462	0.786737	0.916828	0.407077	MAP3K3;TBC1D4;GAB1;PRKCQ;PIK3R1;FOXO3;MAPK13
Metabolic Epileptic Disorders WP5355	4/92	0.64172	0.786737	0.911109	0.404171	GATM;PKM;GLS2;SLC1A5
Sterol Regulatory Element Binding Proteins SREBP Signaling WP1982	3/69	0.642776	0.786737	0.911203	0.402715	YY1;SP1;ACSS1
Envelope Proteins And Potential Roles In EDMD Physiopathology WP4535	2/46	0.649165	0.787622	0.911297	0.393742	ADCY1;SYNE1
Chronic Hyperglycemia Impairment Of Neuron Function WP5283	2/46	0.649165	0.787622	0.911297	0.393742	MMP1;PRKCQ
NAD Metab In Oncogene Induced And Mt Dysfunction Senescence WP5046	1/22	0.657405	0.787622	0.95484	0.400512	PARP1
miRNA Targets In ECM And Membrane Receptors WP2911	1/22	0.657405	0.787622	0.95484	0.400512	COL6A1
Synthesis Of Ceramides And 1 Deoxyceramides WP5194	1/22	0.657405	0.787622	0.95484	0.400512	SGMS1
Glycerolipids And Glycerophospholipids WP4722	1/22	0.657405	0.787622	0.95484	0.400512	PTDSS1
PKC Gamma Calcium Signaling In Ataxia WP4760	1/22	0.657405	0.787622	0.95484	0.400512	GRIA4
Vitamin D In Inflammatory Diseases WP4482	1/22	0.657405	0.787622	0.95484	0.400512	NFKB1
Progeria Associated Lipodystrophy WP5103	1/22	0.657405	0.787622	0.95484	0.400512	PARP1
Familial Hyperlipidemia Type 4 WP5111	1/22	0.657405	0.787622	0.95484	0.400512	ACSS1
NAD Biosynthetic Pathways WP3645	1/22	0.657405	0.787622	0.95484	0.400512	PARP1
Mechanoreg And Pathology Of YAP TAZ Hippo And Non Hippo Mechs WP4534	2/47	0.660794	0.78998	0.890999	0.369153	SGMS1;CTNNB1
Parkin Ubiquitin Proteasomal System Pathway WP2359	3/71	0.661909	0.78998	0.88431	0.36489	CASP8;PSMD13;PSMD2
Axon Guidance WP5289	3/72	0.671194	0.793408	0.871448	0.347444	NRP1;DCC;SLIT1
FGF23 Signaling In Hypophosphatemic Rickets Related Disorders WP4790	1/23	0.673697	0.793408	0.91139	0.359977	NFKB1
Roles Of Ceramides In Development Of Insulin Resistance WP5181	1/23	0.673697	0.793408	0.91139	0.359977	PIK3R1
Nanoparticle Triggered Autophagic Cell Death WP2509	1/23	0.673697	0.793408	0.91139	0.359977	ATG14
Post COVID Neuroinflammation WP5485	1/23	0.673697	0.793408	0.91139	0.359977	TLR7
Unfolded Protein Response WP4925	1/23	0.673697	0.793408	0.91139	0.359977	TXNIP
DNA Mismatch Repair WP531	1/23	0.673697	0.793408	0.91139	0.359977	LIG1
Effect Of Omega 3 PUFA On Huntington 39 S Disease Pathways WP5470	5/120	0.679626	0.794885	0.871176	0.336459	CASP8;SP1;SIN3A;PIK3R1;NFKB1
Interleukin 1 IL 1 Structural Pathway WP2637	2/49	0.683118	0.794885	0.852994	0.325065	MAP3K3;NFKB1
IL3 Signaling WP286	2/49	0.683118	0.794885	0.852994	0.325065	PIK3R1;CRKL
Focal Adhesion PI3K Akt mTOR Signaling WP3932	13/303	0.686152	0.794885	0.897509	0.338053	CSF1R;CAB39L;F2R;PIK3R1;FOXO3;COL1A1;PIK3IP1;PPP2R1A;CREB3L2;COL4A6;ITGA5;IL7R;FGFR1
Arrhythmogenic Right Ventricular Cardiomyopathy WP2118	3/74	0.689196	0.794885	0.846811	0.315207	CTNNB1;CACNA2D4;ITGA5
Kynurenine Pathway And Links To Cell Senescence WP5044	1/24	0.689214	0.794885	0.871719	0.324457	EIF2AK1
Hippocampal Synaptogenesis And Neurogenesis WP5231	1/24	0.689214	0.794885	0.871719	0.324457	CAMKK2
Leucine Isoleucine And Valine Metabolism WP4686	1/24	0.689214	0.794885	0.871719	0.324457	IVD
GPCRs Class B Secretin Like WP334	1/24	0.689214	0.794885	0.871719	0.324457	ADGRE2
Triacylglyceride Synthesis WP325	1/24	0.689214	0.794885	0.871719	0.324457	AGPS
MTHFR Deficiency WP4288	1/24	0.689214	0.794885	0.871719	0.324457	2001-03-01
Hippo Signaling Regulation WP4540	4/98	0.690262	0.794885	0.852683	0.316077	CSF1R;CTNNB1;PRKCQ;FGFR1
Synaptic Signaling Associated With Autism Spectrum Disorder WP4539	2/50	0.693822	0.797511	0.835179	0.305291	NF1;PIK3R1
4 Hydroxytamoxifen DEX And Retinoic Acids Regulation Of P27 WP3879	1/25	0.703994	0.80207	0.835353	0.293197	PIK3R1
Glycosylation And Related Congenital Defects WP4521	1/25	0.703994	0.80207	0.835353	0.293197	PMM2
Mammalian Disorder Of Sexual Development WP4842	1/25	0.703994	0.80207	0.835353	0.293197	CTNNB1
Thyroxine Thyroid Hormone Production WP1981	1/25	0.703994	0.80207	0.835353	0.293197	NFKB1
Oxysterols Derived From Cholesterol WP4545	2/51	0.704225	0.80207	0.818092	0.28687	DBP;ESR1
SARS CoV 2 Mt Chronic Ox Stress And Endothelial Dysfunction WP5183	1/26	0.718072	0.810432	0.801897	0.265577	NFKB1
Growth Factors And Hormones In Beta Cell Proliferation WP5385	1/26	0.718072	0.810432	0.801897	0.265577	SMAD7
Sphingolipid Metabolism Integrated Pathway WP4726	1/26	0.718072	0.810432	0.801897	0.265577	SGMS1
EPO Receptor Signaling WP581	1/26	0.718072	0.810432	0.801897	0.265577	STAT1
Glucuronidation WP698	1/26	0.718072	0.810432	0.801897	0.265577	UGT2B28
Calcium Regulation In Cardiac Cells WP536	6/151	0.728188	0.820363	0.828682	0.262855	RYR1;RGS1;FXYD2;PRKCQ;CASQ1;ADCY1
7 Oxo C And 7 Beta HC Pathways WP5064	1/27	0.731481	0.822586	0.771014	0.241084	DBP
Phosphodiesterases In Neuronal Function WP4222	2/54	0.733676	0.823568	0.770772	0.238699	ADCY1;PDE7A
PI3K Akt Signaling WP4172	14/338	0.738036	0.826972	0.864475	0.262595	CSF1R;F2R;PPP2R3B;PIK3R1;FOXO3;NFKB1;COL1A1;PPP2R1A;CREB3L2;COL6A1;COL4A6;ITGA5;IL7R;FGFR1
Pathogenic Escherichia Coli Infection WP2272	2/55	0.742923	0.829116	0.75619	0.224712	CTNNB1;TLR5
Sphingolipid Metabolism In Senescence WP5121	1/28	0.744252	0.829116	0.742419	0.219292	GBA1
Dravet Syndrome WP5200	1/28	0.744252	0.829116	0.742419	0.219292	NFKB1
Nonalcoholic Fatty Liver Disease WP4396	6/154	0.745273	0.829116	0.811756	0.23866	MLXIP;CASP8;LEPR;PIK3R1;NFKB1;SMAD7
Smith Magenis And Potocki Lupski Syndrome Copy Number Variation WP5381	6/156	0.756225	0.834067	0.800847	0.22377	MIGA1;LIMK1;COPS7A;NFKB1;ETV5;FERD3L
Selective Expression Of Chemokine Receptors T Cell Polarization WP4494	1/29	0.756417	0.834067	0.715866	0.199843	CD40LG
Disorders Of Bile Acid Synthesis And Biliary Transport WP5176	1/29	0.756417	0.834067	0.715866	0.199843	ABCC4
Statin Inhibition Of Cholesterol Production WP430	1/29	0.756417	0.834067	0.715866	0.199843	ACSS1
RAS And Bradykinin Pathways In COVID 19 WP4969	1/29	0.756417	0.834067	0.715866	0.199843	NFKB1
Proximal Tubule Transport WP4917	2/57	0.760593	0.83719	0.728615	0.199391	ABCC4;FXYD2
Matrix Metalloproteinases WP129	1/30	0.768004	0.837594	0.691145	0.182435	MMP1
GDNF RET Signaling Axis WP4830	1/30	0.768004	0.837594	0.691145	0.182435	CTNNB1
Autophagy WP4923	1/30	0.768004	0.837594	0.691145	0.182435	ATG14
Polycystic Kidney Disease Pathway WP2571	3/84	0.768137	0.837594	0.741875	0.195697	WNT5B;WNT7B;CTNNB1
15Q11Q13 Copy Number Variation WP5407	2/58	0.769027	0.837594	0.715567	0.187929	KLF13;SIN3A
Pre Implantation Embryo WP3527	2/58	0.769027	0.837594	0.715567	0.187929	ZFP36L2;SMARCA4
ADHD And Autism ASD Pathways WP5420	15/370	0.771401	0.838713	0.844844	0.219277	CBLIF;GLS2;AMPD1;PIK3R1;ATG14;SOD3;HCFC1;CYP2C9;GATM;GRM7;PAH;SESN1;CTNNB1;SLC25A12;GRIA4
Clear Cell Renal Cell Carcinoma Pathways WP4018	3/85	0.775051	0.841214	0.732789	0.186734	PKM;BHLHE41;SSPN
Ethanol Effects On Histone Modifications WP3996	1/31	0.779041	0.842608	0.668072	0.166812	ELP3
GABA Receptor Signaling WP4159	1/31	0.779041	0.842608	0.668072	0.166812	AP2M1
2Q13 Copy Number Variation Syndrome WP5222	2/60	0.78512	0.847712	0.690819	0.167122	STAT1;GAS6
GPCRs Class A Rhodopsin Like WP455	10/259	0.791243	0.852845	0.803256	0.188082	PTGFR;OR10H1;OR10H2;P2RY14;F2R;P2RY1;FFAR1;CCR6;OR3A2;OR10A5
Orexin Receptor Pathway WP5094	3/88	0.794784	0.854423	0.706814	0.162344	SLC1A2;PIK3R1;CAMKK2
Resistin As A Regulator Of Inflammation WP4481	1/33	0.799565	0.854423	0.626251	0.140085	NFKB1
Signal Transduction Through IL1R WP4496	1/33	0.799565	0.854423	0.626251	0.140085	NFKB1
Prostaglandin Signaling WP5088	1/33	0.799565	0.854423	0.626251	0.140085	NFKB1
MAPK Cascade WP422	1/33	0.799565	0.854423	0.626251	0.140085	MAP3K3
JAK STAT Signaling In The Regulation Of Beta Cells WP5358	1/34	0.809101	0.861658	0.607242	0.128633	STAT1
Alstrom Syndrome WP5202	1/34	0.809101	0.861658	0.607242	0.128633	VCP
3Q29 Copy Number Variation Syndrome WP4906	2/64	0.814369	0.864313	0.646114	0.132674	PXN;MYCBP2
G1 To S Cell Cycle Control WP45	2/64	0.814369	0.864313	0.646114	0.132674	CCNG2;ATM
Fatty Acids And Lipoproteins Transport In Hepatocytes WP5323	1/35	0.818184	0.866885	0.589351	0.118264	STARD3
22Q11 2 Copy Number Variation Syndrome WP4657	4/119	0.822585	0.868594	0.696204	0.135971	ALDH4A1;NCOR1;CRKL;FGFR1
Spinal Cord Injury WP2431	4/119	0.822585	0.868594	0.696204	0.135971	CHST11;SLIT1;CD47;FOXO3
Thyroid Hormones And Peripheral Downstream Signaling Effects WP4746	3/93	0.824449	0.86909	0.667371	0.128829	TBC1D4;CTNNB1;FGFR1
Serotonin HTR1 Group And FOS Pathway WP722	1/37	0.835075	0.878804	0.556551	0.100309	RASGRF1
mBDNF And proBDNF Regulation Of GABA Neurotransmission WP4829	1/38	0.842924	0.88111	0.54148	0.0925275	PIK3R1
Amyotrophic Lateral Sclerosis ALS WP2447	1/38	0.842924	0.88111	0.54148	0.0925275	SLC1A2
Type II Interferon Signaling WP619	1/38	0.842924	0.88111	0.54148	0.0925275	STAT1
Sleep Regulation WP3591	1/38	0.842924	0.88111	0.54148	0.0925275	PER3
Folate Metabolism WP176	2/69	0.845893	0.882733	0.597739	0.100039	SOD3;NFKB1
Neural Crest Cell Migration During Development WP4564	1/40	0.857519	0.89039	0.513658	0.0789555	TIAM1
Microglia Pathogen Phagocytosis Pathway WP3937	1/40	0.857519	0.89039	0.513658	0.0789555	PIK3R1
ATM Signaling WP2516	1/40	0.857519	0.89039	0.513658	0.0789555	ATM
Cholesterol Metabolism WP5304	2/72	0.862392	0.893961	0.572031	0.0846865	STARD3;VAPA
Glycosaminoglycan Synthesis In Fibroblasts WP5395	1/41	0.8643	0.89445	0.50079	0.0730328	CHST11
Sudden Infant Death Syndrome SIDS Susceptibility Pathways WP706	5/157	0.87199	0.900912	0.657825	0.090107	SP1;PAH;MBD1;CTNNB1;NFKB1
Neural Crest Cell Migration In Cancer WP4565	1/43	0.876911	0.901624	0.476893	0.0626399	TIAM1
Hedgehog Signaling WP4249	1/43	0.876911	0.901624	0.476893	0.0626399	GLI2
Genes Related To Primary Cilium Development Based On CRISPR WP4536	3/104	0.877021	0.901624	0.594342	0.0779922	C2CD3;INPP5E;BBS9
Neurodegeneration W Brain Fe Accumulation NBIA Subtypes Pathway WP4577	1/44	0.88277	0.906039	0.465778	0.0580781	ATG14
Glycolysis And Gluconeogenesis WP534	1/45	0.888351	0.909729	0.455168	0.0538867	PKM
2Q37 Copy Number Variation Syndrome WP5224	4/136	0.892014	0.909729	0.605997	0.0692494	SEPTIN2;SEPTIN6;D2HGDH;CFLAR
Endoplasmic Reticulum Stress Response In Coronavirus Infection WP4861	1/46	0.893666	0.909729	0.44503	0.0500317	EIF2AK1
Translation Inhibitors In Chronically Activated PDGFRA Cells WP4566	1/46	0.893666	0.909729	0.44503	0.0500317	PIK3R1
NO cGMP PKG Mediated Neuroprotection WP4008	1/46	0.893666	0.909729	0.44503	0.0500317	NFKB1
Translation Factors WP107	1/50	0.912516	0.927402	0.408615	0.0374085	EIF2AK1
Netrin UNC5B Signaling WP4747	1/52	0.92065	0.934144	0.392549	0.0324543	COL1A1
Cardiac Hypertrophic Response WP2795	1/55	0.931455	0.943423	0.370683	0.026321	NFKB1
Fragile X Syndrome WP4549	3/122	0.933421	0.943423	0.503962	0.0347227	NF1;GAB1;AP2M1
Amino Acid Metabolism WP3925	2/91	0.934337	0.943423	0.449462	0.0305267	PKM;ACSS1
Lung Fibrosis WP3624	1/63	0.953614	0.961329	0.322717	0.015328	SMAD7
Integrin Mediated Cell Adhesion WP185	2/101	0.956085	0.962264	0.403849	0.018136	PXN;ITGA5
Trans Sulfuration One Carbon Metabolism And Related Pathways WP2525	1/69	0.965393	0.970065	0.294149	0.0103598	SOD3
Primary Focal Segmental Glomerulosclerosis FSGS WP2572	1/72	0.97011	0.971669	0.281675	0.00854779	CTNNB1
Peptide GPCRs WP24	1/72	0.97011	0.971669	0.281675	0.00854779	CCR6
Cell Cycle WP179	2/120	0.97993	0.97993	0.338482	0.00686233	ATM;BUB3

## Sheet: BioPlanet
Term	Overlap	P-value	Adjusted p-value	Odds Ratio	Combined Score	Genes
Integrated breast cancer pathway	21/152	1.06781e-05	0.00853716	3.2646	37.371	PIGR;MMP1;STAT1;USP21;ZMYND8;NCOA3;MYCBP2;SMAD6;ESR1;NFKB1;PIAS1;SMAD7;SMARCA4;TGFBR2;CASP8;RASGEF1A;ZMIZ1;SP1;NF1;CTNNB1;ATM
Androgen receptor signaling, proteolysis, and transcription regulation	15/88	1.55646e-05	0.00853716	4.17046	46.1692	SMARCE1;UBE2I;NCOA3;RNF6;PIK3R1;ETV5;PIAS1;NCOR1;ZMIZ1;SP1;CTNNB1;KAT7;BMF;GAS6;PATZ1
Regulated proteolysis of p75 neurotrophin receptor	5/11	8.69623e-05	0.0225695	16.7937	157.021	APH1A;ADAM17;APH1B;PSEN1;NFKB1
Immune system	74/998	9.43197e-05	0.0225695	1.65713	15.3597	CD40;PRKCSH;ADAR;UBE2Z;CRKL;SEC61A1;CASP8;CASP10;KIF5C;PPP2R1A;PSMD2;NUP62;FBXO4;CTLA4;CTSH;CCR6;HLA-DOA;HLA-DOB;CD34;AP2M1;TICAM2;PIAS1;TAPBP;ADAM17;CD200R1;AIM2;IRF3;NUP50;PSME1;TXNIP;TLR10;IRF5;PRKCQ;TLR7;MASP1;TLR5;CD44;RAPGEF4;BIRC3;RAB7A;BLK;SP100;UBA7;PSMD13;ASB13;RNF6;PIK3R1;KIR2DL1;FOXO3;C7;BTLA;TNFRSF14;NUP43;ICOS;PAG1;MICA;MAP3K3;STAT1;ERAP1;IGKV1-5;HUWE1;NFKB1;MAPK13;KLHL9;CYLD;IGLV1-…
Messenger RNA processing	23/203	0.000102869	0.0225695	2.60104	23.8829	CPSF7;RNGTT;PRMT2;CPSF1;CELF1;CELF2;METTL3;DDX23;ADAR;A1CF;SRRM1;NUDT21;PRPF6;ERCC3;PRPF3;NUP50;NUP62;POLR2D;HNRNPD;DHX38;NUP43;SNRNP200;SF3B1
Notch signaling pathway	16/121	0.000196068	0.0321745	3.09085	26.3868	NOTCH2;CSF1R;PIK3R1;PSEN1;CFLAR;RBPJ;NFKB1;YY1;APH1A;ADAM17;APH1B;SNW1;NCOR1;MAPT;EPS15;BIRC3
Control of gene expression by vitamin D receptor	7/27	0.000205307	0.0321745	7.0631	59.9728	SMARCE1;SMARCC2;NCOR1;SNW1;NCOA3;ARID1A;SMARCA4
Interferon-beta enhancer pathway	7/30	0.000415545	0.0569816	6.14085	47.8122	SMARCE1;SMARCC2;IRF3;IRF5;ARID1A;NFKB1;SMARCA4
Nuclear signaling by ErbB4	8/40	0.00049861	0.0607751	5.04724	38.3776	APH1A;ADAM17;APH1B;NCOR1;NRG3;PGR;PSEN1;ESR1
Generic transcription pathway	33/377	0.000564778	0.0619562	1.95689	14.6358	ZNF573;NOTCH2;CHD9;RBPJ;ZKSCAN3;ZKSCAN4;ZNF225;ZNF224;ZNF264;PARP1;USP9X;NCOA3;NR1D2;ESRRG;NR1D1;TBX5;ESR1;MED6;NRBP1;SMAD7;SNW1;MED24;NCOR1;SP1;ZNF419;ZNF418;ZNF417;ZNF337;PGR;ZNF136;ZNF354C;TRIM33;PPARD
Signaling events mediated by stem cell factor receptor (c-Kit)	9/52	0.000691196	0.0689311	4.22764	30.7649	SPRED2;DOK1;SPRED1;STAT1;GAB1;STAP1;PIK3R1;FOXO3;CRKL
Interleukin-2 signaling pathway	61/847	0.000803512	0.0734544	1.59442	11.3626	GALNT11;NUMA1;LY75;CRKL;DUSP10;CASP10;RGS1;BCAP29;CTSH;CCR6;KLF11;STARD5;KLF13;TSC22D3;ATRX;VWA5A;ANK2;IL16;TGFBR2;TMX1;IRF5;MAPT;MAPRE2;PPARD;BIRC3;MACF1;SP100;PRKX;TNFRSF11A;PIK3R1;KIR2DL1;SLC1A5;FOXO3;ZFP36L2;AP3M2;ATXN7;PRKY;POLR2D;BMF;TNFRSF14;MICA;SLAMF1;STAT1;FUCA1;TXNRD1;TBCD;PDE4DIP;CFLAR;TBX5;SORBS3;NFKB1;PRRC2B;P2RX5;CD40LG;CCNG2;NFIC;REL;PTPN7;IL7R;PDE7A;LPIN2
Chromatin remodeling by hSWI/SNF ATP-dependent complexes	5/17	0.000917495	0.0774225	8.39418	58.7077	SMARCE1;SMARCC2;NF1;ARID1A;SMARCA4
Antigen-activated B-cell receptor generation of second messengers	21/211	0.00113637	0.087506	2.24384	15.213	BLK;KLF11;CD40;CD72;IGKV1-5;GAB1;PIK3R1;NFKB1;CRKL;NFATC4;MAPK13;DOK1;CD40LG;IGLV1-51;REL;PRKCQ;TLR10;FCGR2B;MEF2D;PAG1;CD22
Gene expression	67/968	0.00127346	0.087506	1.52842	10.1885	ZNF573;CHD9;ADAR;RBPJ;SEC61A1;PPP2R1A;PSMD2;NUP62;PARP1;NCOA3;METTL3;MED6;NRBP1;SRRM1;MED24;NCOR1;PRPF6;NUP50;PSME1;PGR;SNRNP200;PPARD;NOTCH2;RRN3;PSMD13;DDX23;POLR2D;ZKSCAN3;DHX38;SSR1;NUP43;ZKSCAN4;ZNF225;ZNF224;SF3B1;ZNF264;CPSF7;RNGTT;POU2F1;CPSF1;USP9X;NR1D2;ESRRG;NR1D1;TBX5;A1CF;ESR1;SMAD7;NUDT21;SNW1;ERCC3;SP1;ZNF419;AGO1;ZNF418;NFIC;CNOT2;ZNF417;HNRNPD;TAF6;ZNF337;DCP1A;ZNF136;TRIM33;TNRC…
Notch receptor processing	4/11	0.00127629	0.087506	11.5029	76.6528	APH1A;NOTCH2;APH1B;PSEN1
TGF-beta regulation of extracellular matrix	43/565	0.0016417	0.10018	1.68275	10.7898	NRP2;CELF2;NPR3;TACSTD2;LRP4;LTBP2;SLC1A4;SPINT2;PIK3R1;FBLN5;PTGS1;HERPUD1;C7;GM2A;EPB41L2;LEPR;SSR1;DHX38;ICOS;ZNF148;HLA-DOA;CD34;BRD2;BTN2A1;TXNRD1;NCOA3;F2R;MICAL2;MID1;SOD3;ETV5;CHERP;SMAD7;COL1A1;SFRP1;PKM;AKR1B10;PRPF6;RABEP2;PLA2R1;IVL;NFE2L1;GSTM5
Presenilin action in Notch and Wnt signaling	8/48	0.00174986	0.10018	4.03609	25.622	APH1A;ADAM17;APH1B;APC;CTNNB1;PSEN1;RBPJ;PPARD
Lysosome	14/121	0.00181456	0.10018	2.648	16.7139	MANBA;FUCA1;SGSH;PLA2G15;AP3M2;GGA2;GGA1;GM2A;LAMP3;PPT1;CTSH;MAN2B1;TPP1;LGMN
Caspase-mediated cleavage of cytoskeletal proteins	4/12	0.00184282	0.10018	10.0645	63.3706	CASP8;DBNL;MAPT;ADD1
Proteolysis and signaling pathway of Notch	3/6	0.00191776	0.10018	20.113	125.839	ADAM17;PSEN1;RBPJ
Adaptive immune system	45/606	0.00209488	0.103827	1.63876	10.1083	BLK;CD40;UBA7;PSMD13;ASB13;RNF6;PIK3R1;KIR2DL1;FOXO3;UBE2Z;SEC61A1;PPP2R1A;KIF5C;PSMD2;BTLA;FBXO4;CTLA4;CTSH;TNFRSF14;ICOS;HLA-DOA;HLA-DOB;CD34;AP2M1;PAG1;MICA;ERAP1;IGKV1-5;HUWE1;NFKB1;TAPBP;KLHL9;CD200R1;IGLV1-51;CD40LG;PSME1;REL;ASB7;PRKCQ;FCGR2B;DZIP3;LGMN;RNF220;RAPGEF4;RAB7A
Androgen receptor proteolysis and transcription regulation	9/61	0.0022267	0.103827	3.49428	21.3404	KDM3A;CASP8;KDM4C;UBE2I;ZMIZ1;CTNNB1;TCF4;PATZ1;PIAS1
Phosphatidylinositol metabolism	8/50	0.00229022	0.103827	3.84349	23.365	TPTE2;FIG4;MTMR2;INPP5E;PIP4K2A;PIP4K2B;PIK3R1;MTM1
Capped intron-containing pre-mRNA processing	15/138	0.00236615	0.103827	2.46863	14.9266	CPSF7;CPSF1;METTL3;DDX23;SRRM1;NUDT21;PRPF6;NUP50;NUP62;POLR2D;HNRNPD;DHX38;NUP43;SNRNP200;SF3B1
Apoptosis	22/242	0.00278499	0.11571	2.02909	11.9382	DBNL;PSMD13;DCC;PRKX;PIK3R1;CFLAR;NFKB1;ADD1;CASP8;IRF3;APC;CASP10;PSMD2;PSME1;CTNNB1;ACIN1;PRKCQ;ATM;BMF;IRF5;MAPT;BIRC3
Spliceosome	14/127	0.00285916	0.11571	2.5066	14.6817	AQR;DDX23;CDC5L;CHERP;PQBP1;PRPF6;SNW1;DDX39B;PRPF3;DHX38;ACIN1;SNRNP200;SF3B1;RBM22
Apoptotic execution phase	8/52	0.00295339	0.11571	3.6684	21.3677	CASP8;DBNL;APC;ACIN1;CTNNB1;PRKCQ;MAPT;ADD1
Gamma-secretase-mediated ErbB4 signaling pathway	3/7	0.00323775	0.118394	15.0839	86.4744	ADAM17;NRG3;PSEN1
Post-transcriptional silencing by small RNAs	3/7	0.00323775	0.118394	15.0839	86.4744	AGO1;TNRC6A;TNRC6B
Signaling by NOTCH2	4/14	0.00345367	0.118891	8.05074	45.6342	NOTCH2;APH1A;APH1B;PSEN1
LPA receptor mediated events	9/65	0.00346812	0.118891	3.244	18.3745	TIAM1;PXN;GNA12;GAB1;ARHGEF1;MAPT;ADCY1;PIK3R1;NFKB1
Signaling by NOTCH	13/119	0.00429558	0.142795	2.47953	13.5139	NOTCH2;TLE3;PSEN1;RBPJ;APH1A;ADAM17;APH1B;SNW1;NCOR1;AGO1;ST3GAL4;TNRC6A;TNRC6B
Induction of apoptosis through DR3 and DR4/5 death receptors	6/34	0.00485479	0.156638	4.31795	23.0051	CASP8;PARP1;CASP10;CFLAR;NFKB1;BIRC3
CDC42 signaling events	9/70	0.0057191	0.174274	2.97732	15.3747	EPS8;TIAM1;APC;EXOC7;RASGRF1;LIMK1;CTNNB1;PAX6;PIK3R1
Signaling events mediated by HDAC class I	9/70	0.0057191	0.174274	2.97732	15.3747	YY1;NCOR1;UBE2I;TFCP2;SIN3A;NUP62;GATAD2B;NFKB1;SMAD7
Estrogen receptor transcription factor targets	5/26	0.00684211	0.196479	4.79441	23.8985	NCOR1;NCOA3;PGR;ESR1;SMARCA4
Segmentation clock	5/26	0.00684211	0.196479	4.79441	23.8985	NOTCH2;ADAM17;CTNNB1;PSEN1;RBPJ
Activation of chaperones by IRE1 alpha	7/48	0.00716423	0.196479	3.44161	16.9969	EDEM1;CXXC1;SYVN1;SSR1;TPP1;PDIA6;ADD1
Intestinal immune network for IgA production	7/48	0.00716423	0.196479	3.44161	16.9969	PIGR;CD40;CD40LG;TNFRSF17;HLA-DOA;ICOS;HLA-DOB
Toll-like receptor signaling pathway regulation	14/142	0.00772224	0.206617	2.2111	10.754	CD40;TICAM2;STAT1;TMED7-TICAM2;PIK3R1;SMAD6;NFKB1;MAPK13;CYLD;CASP8;IRF3;IRF5;TLR7;TLR5
TNF-alpha signaling pathway	11/101	0.00844457	0.210058	2.46787	11.7822	CYLD;MAP3K3;ADAM17;CASP8;STAT1;PSMD2;REL;TNIK;CFLAR;NFKB1;BIRC3
BMAL1-CLOCK/NPAS2 activates circadian expression	6/38	0.00848726	0.210058	3.77741	18.0152	DBP;NCOR1;CHD9;NCOA3;BHLHE41;NR1D1
T cell receptor regulation of apoptosis	42/603	0.00866864	0.210058	1.52445	7.23817	CSF1R;FAF1;POGK;RASGRF1;RCBTB2;YY1;SEC61A1;CHST11;TLK2;TP53BP2;BMF;CCR6;EDARADD;ST14;IGFBP5;STAT1;MBD1;TSC22D3;F2R;ERAP1;HUWE1;CFLAR;ZDHHC17;MR1;NFKB1;SMARCA4;DOK1;TFCP2;CD40LG;VAPA;ABI1;PSME1;REL;TMBIM6;ATM;TLR7;PTPN7;PLA2R1;IL7R;PDE7A;BIRC3;FGFR1
Circadian rhythm	8/62	0.00876237	0.210058	2.9875	14.1526	DBP;NCOR1;PER3;CHD9;NCOA3;BHLHE41;NR1D1;MEF2D
Hematopoietic cell lineage	10/88	0.00880827	0.210058	2.58756	12.2445	FCER2;CSF1R;IL11RA;ANPEP;ITGA5;CD1C;IL7R;CD34;CD44;CD22
Nuclear receptor transcription pathway	7/51	0.00996793	0.223276	3.20645	14.7765	PGR;ESRRG;NR1D2;NR1D1;ESR1;NRBP1;PPARD
PIP biosynthesis at the late endosome membrane	3/10	0.00997312	0.223276	8.61804	39.7107	FIG4;MTMR2;MTM1
Zinc influx into cells by the SLC39 gene family	3/10	0.00997312	0.223276	8.61804	39.7107	SLC39A1;SLC39A14;SLC39A3
Developmental biology	31/420	0.0104046	0.228277	1.6182	7.38789	NRP1;NRP2;PLXND1;CHD9;RBPJ;FOXO3;SLIT1;MEF2D;AP2M1;CD72;DCC;NCOA3;TCF12;LIMK1;PAX6;ANK2;ANK1;GFRA2;MED6;NFKB1;COL1A1;MED24;NCOR1;KCNQ2;COL6A1;DCX;CTNNB1;PRKCQ;TCF4;ITGA5;FGFR1
Cell adhesion molecules (CAMs)	13/133	0.010745	0.22914	2.18863	9.92177	CD40;NEGR1;GLG1;CD40LG;CTLA4;SIGLEC1;HLA-DOA;ICOS;HLA-DOB;CD34;CD22;MPZL1;CD276
ER-associated degradation (ERAD) pathway	4/19	0.0110706	0.22914	5.36575	24.1645	SEC61A1;UBE2I;EDEM1;MAN2B1
Signaling by FGFR1 fusion mutants	4/19	0.0110706	0.22914	5.36575	24.1645	STAT1;CNTRL;MYO18A;PIK3R1
Transcriptional activity of SMAD2/SMAD3-SMAD4 heterotrimer	6/41	0.012261	0.237492	3.45309	15.1982	NCOR1;PARP1;USP9X;SP1;TRIM33;SMAD7
Signaling events mediated by hepatocyte growth factor receptor (c-Met)	9/79	0.0124239	0.237492	2.59329	11.3797	APC;PXN;GAB1;CTNNB1;PTPRJ;PIK3R1;RIN2;EPS15;CRKL
Asthma	5/30	0.0126798	0.237492	4.02646	17.5865	CD40;CD40LG;HLA-DOA;MS4A2;HLA-DOB
Signaling by FGFR1 mutants	5/30	0.0126798	0.237492	4.02646	17.5865	STAT1;CNTRL;MYO18A;PIK3R1;FGFR1
Tumor necrosis factor (TNF) pathway	5/30	0.0126798	0.237492	4.02646	17.5865	MAP3K3;CASP8;CFLAR;NFKB1;BIRC3
Signaling by ERBB4	10/93	0.0127731	0.237492	2.43104	10.6004	APH1A;ADAM17;NCOR1;APH1B;NRG3;PGR;PIK3R1;PSEN1;FOXO3;ESR1
Dual incision reaction in GG-NER	4/20	0.0133278	0.243655	5.03013	21.7196	DDB1;ERCC3;ERCC5;DDB2
Diabetes pathways	13/137	0.0135487	0.243655	2.11759	9.10872	IGFBP5;EXOC7;MMP1;EDEM1;CXXC1;SYVN1;PDIA6;ADD1;HERPUD1;EXOC4;SSR1;TPP1;CD44
CD40/CD40L signaling	5/31	0.0145414	0.25729	3.87139	16.3789	FCAMR;CD40;CD40LG;NFKB1;BIRC3
p75 neurotrophin receptor-mediated signaling	12/124	0.014972	0.260703	2.16319	9.08879	APH1A;TIAM1;AKAP13;ADAM17;APH1B;RASGRF1;ARHGEF1;PIK3R1;PSEN1;NFKB1;ARHGAP4;BIRC3
D4-GDI signaling pathway	3/12	0.0170317	0.291253	6.70222	27.296	CASP8;PARP1;CASP10
MicroRNA regulation of DNA damage response	8/70	0.0175952	0.291253	2.60092	10.508	RAD52;CASP8;RRM2B;SESN1;TLK2;RAD17;ATM;DDB2
Pre-NOTCH expression and processing	7/57	0.0178412	0.291253	2.82078	11.3572	NOTCH2;SNW1;AGO1;ST3GAL4;RBPJ;TNRC6A;TNRC6B
Global genomic nucleotide excision repair (GG-NER)	5/33	0.0187948	0.291253	3.59448	14.2851	DDB1;LIG1;ERCC3;ERCC5;DDB2
Signaling by FGFR mutants	6/45	0.0189402	0.291253	3.09827	12.2892	STAT1;CNTRL;MYO18A;GAB1;PIK3R1;FGFR1
Bacterial invasion of epithelial cells	8/71	0.019032	0.291253	2.5595	10.1398	PXN;GAB1;ELMO1;CTNNB1;ITGA5;PIK3R1;WASF2;CRKL
C-Myb transcription factor network	9/85	0.0193662	0.291253	2.3878	9.41802	CSF1R;ZFHX3;NCOR1;UBE2I;SIN3A;SP1;ANPEP;CD34;BIRC3
Arachidonic acid metabolism	7/58	0.0194854	0.291253	2.76533	10.8901	GGT5;CYP2C9;CYP2C8;CYP2B6;CYP2U1;ALOX15B;PTGS1
HIV-1 Nef as negative effector of Fas and TNF	7/58	0.0194854	0.291253	2.76533	10.8901	CASP8;NUMA1;PARP1;PSEN1;CFLAR;NFKB1;BIRC3
FasL/CD95L signaling	2/5	0.0204777	0.291253	13.3945	52.0835	CASP8;CASP10
Neurophilin interactions with VEGF and VEGF receptor	2/5	0.0204777	0.291253	13.3945	52.0835	NRP1;NRP2
Phenylalanine, tyrosine and tryptophan biosynthesis	2/5	0.0204777	0.291253	13.3945	52.0835	IL4I1;PAH
Fas signaling pathway	11/115	0.0208961	0.291253	2.13408	8.25504	CASP8;PARP1;CASP10;FAF1;PIK3R1;CD47;CFLAR;NFKB1;NFATC4;BIRC3;MAPK13
Caspase cascade in apoptosis	7/59	0.0212325	0.291253	2.71201	10.4473	TFAP2A;CASP8;NUMA1;PARP1;CASP10;LIMK1;BIRC3
Death receptor signaling	3/13	0.0213724	0.291253	6.03168	23.1957	CASP8;CASP10;CFLAR
NICD trafficking to the nucleus	3/13	0.0213724	0.291253	6.03168	23.1957	NOTCH2;SNW1;RBPJ
PIP biosynthesis at the early endosome membrane	3/13	0.0213724	0.291253	6.03168	23.1957	FIG4;MTMR2;MTM1
Downregulation of SMAD2/3-SMAD4 transcriptional activity	4/23	0.021771	0.291253	4.23523	16.209	NCOR1;PARP1;USP9X;TRIM33
Rho cell motility signaling pathway	4/23	0.021771	0.291253	4.23523	16.209	OPHN1;LIMK1;ARHGEF1;ARHGAP4
Signaling by NOTCH1	8/73	0.0221532	0.292796	2.48048	9.45008	APH1A;TLE3;ADAM17;NCOR1;APH1B;SNW1;PSEN1;RBPJ
Nucleotide-binding domain, leucine rich repeat containing receptor (NLR) signaling pathways	6/47	0.0230641	0.301206	2.94683	11.108	CYLD;CASP8;AIM2;TXNIP;MAPK13;BIRC3
Primary immunodeficiency	5/35	0.0237932	0.304124	3.3545	12.5403	CD40;CD40LG;RFX5;ICOS;IL7R
Integrins in angiogenesis	8/74	0.023842	0.304124	2.44277	9.12694	COL1A1;CSF1R;CASP8;COL6A1;PXN;COL4A6;PIK3R1;TGFBR2
Leptin signaling pathway	7/61	0.025047	0.315823	2.61129	9.62782	STAT1;SP1;LEPR;REL;PIK3R1;ESR1;NFKB1
Post-translational regulation of adherens junction stability and disassembly	6/48	0.0253355	0.31583	2.87651	10.5728	TIAM1;GNA12;SLIT1;CTNNB1;RIN2;RAB7A
Intronless pre-mRNA processing	3/14	0.0262594	0.323669	5.48306	19.9569	NUDT21;CPSF7;CPSF1
Shigellosis	7/62	0.0271196	0.330558	2.56367	9.24845	ELMO1;ITGA5;WASF2;CD44;NFKB1;CRKL;MAPK13
Ubiquitin-mediated proteolysis	12/136	0.0286496	0.344222	1.95261	6.93688	DDB1;KLHL9;UBE2I;UBA7;FBXO4;HUWE1;SYVN1;UBE2Z;MID1;PIAS1;DDB2;BIRC3
Regulatory RNA pathways	4/25	0.0288682	0.344222	3.83147	13.5826	AGO1;POLR2D;TNRC6A;TNRC6B
Disease	43/674	0.0306849	0.361949	1.38388	4.82141	APCS;STX16;PSMD13;PXN;CXXC1;ADCY1;PIK3R1;FOXO3;ADD1;HERPUD1;IL4I1;PPP2R1A;PSMD2;POLR2D;CNTRL;NUP62;MYO18A;SSR1;NUP43;EPS15;AP2M1;PAG1;RNGTT;IGFBP5;LIG1;EXOC7;STAT1;MMP1;EDEM1;SYVN1;GAB1;PDIA6;ADAM17;ERCC3;PAH;NUP50;PSME1;EXOC4;ELMO1;TPP1;TAF6;CD44;FGFR1
Cytochrome P450 metabolism of xenobiotics	3/15	0.0316907	0.365944	5.02587	17.348	CYP2C9;CYP2C8;CYP2B6
Validated nuclear estrogen receptor beta network	3/15	0.0316907	0.365944	5.02587	17.348	SMARCE1;NCOA3;SMARCA4
RAC1 activity regulation	5/38	0.032771	0.374477	3.04906	10.4223	EPS8;TIAM1;RASGRF1;ABI1;ELMO1
Unfolded protein response	8/79	0.0336489	0.380545	2.27015	7.69983	EDEM1;CXXC1;SYVN1;SSR1;TPP1;PDIA6;ADD1;HERPUD1
L1CAM interactions	9/94	0.0344841	0.382534	2.13396	7.1856	NRP1;NRP2;KCNQ2;DCX;ANK2;ITGA5;ANK1;AP2M1;FGFR1
E-cadherin nascent AJ-like junctions pathway	5/39	0.0361731	0.382534	2.95923	9.82298	TIAM1;ABI1;CTNNB1;PIK3R1;WASF2
FAS pathway and stress induction of heat shock protein regulation	5/39	0.0361731	0.382534	2.95923	9.82298	CASP8;PARP1;CASP10;FAF1;CFLAR
GAB1 signalosome	5/39	0.0361731	0.382534	2.95923	9.82298	PXN;GAB1;PIK3R1;FOXO3;PAG1
EGF/EGFR signaling pathway	12/141	0.036428	0.382534	1.87643	6.21553	EPS8;MAP3K3;ATXN2;SP1;STAT1;ABI1;GAB1;ARHGEF1;PIK3R1;EPS15;AP2M1;CRKL
Signaling by TGF-beta receptor complex	7/66	0.0365676	0.382534	2.38936	7.90543	NCOR1;PARP1;USP9X;SP1;TRIM33;TGFBR2;SMAD7
RORA activates circadian expression	4/27	0.0371857	0.382534	3.49793	11.5146	NCOR1;CHD9;NCOA3;NR1D1
CD40L signaling pathway	3/16	0.0376606	0.382534	4.63902	15.212	CD40;CD40LG;NFKB1
Cell death signaling by NRIF in the nucleus	3/16	0.0376606	0.382534	4.63902	15.212	APH1A;APH1B;PSEN1
GluR2-containing AMPA receptor trafficking	3/16	0.0376606	0.382534	4.63902	15.212	NSF;AP2M1;GRIA4
Other glycan degradation	3/16	0.0376606	0.382534	4.63902	15.212	MANBA;FUCA1;MAN2B1
Arachidonate epoxygenase/epoxide hydrolase pathway	2/7	0.0403656	0.387549	8.03586	25.7933	CYP2C9;CYP2C8
Neurofascin interactions	2/7	0.0403656	0.387549	8.03586	25.7933	DCX;ANK1
NrCAM interactions	2/7	0.0403656	0.387549	8.03586	25.7933	NRP2;ANK1
Vitamin D (calciferol) metabolism	2/7	0.0403656	0.387549	8.03586	25.7933	GC;LGMN
SMAD2/3 nuclear pathway	8/82	0.0406879	0.387549	2.17777	6.97284	NCOR1;SIN3A;SP1;FOXO3;DCP1A;ESR1;RUNX1;SMAD7
Interferon-gamma signaling pathway	9/97	0.0409513	0.387549	2.06089	6.58531	SP100;IRF3;STAT1;IRF5;PIK3R1;CD44;CRKL;PIAS1;SMAD7
TRAIL signaling pathway	4/28	0.0418076	0.387549	3.35201	10.6415	CASP8;CASP10;PIK3R1;CFLAR
Wnt signaling pathway and pluripotency	9/98	0.0432773	0.387549	2.03762	6.3984	WNT5B;APC;PPP2R1A;WNT7B;CTNNB1;PRKCQ;PPP2R3B;CD44;PPARD
PDGFB signaling pathway	11/129	0.0433982	0.387549	1.8795	5.89662	EPS8;BLK;DOK1;PPP2R1A;STAT1;ABI1;GAB1;PTPRJ;PIK3R1;WASF2;PAG1
Apoptotic cleavage of cellular proteins	3/17	0.04416	0.387549	4.30744	13.4389	CASP8;ACIN1;PRKCQ
Atypical NF-kappaB pathway	3/17	0.04416	0.387549	4.30744	13.4389	REL;PIK3R1;NFKB1
Beta-catenin phosphorylation cascade	3/17	0.04416	0.387549	4.30744	13.4389	APC;PPP2R1A;CTNNB1
Dendritic cells in regulating TH1 and TH2 development	3/17	0.04416	0.387549	4.30744	13.4389	CD40;ANPEP;TLR7
PIP biosynthesis at the Golgi membrane	3/17	0.04416	0.387549	4.30744	13.4389	TPTE2;FIG4;INPP5E
SUMOylation by RanBP2 regulates transcriptional repression	3/17	0.04416	0.387549	4.30744	13.4389	UBE2I;NUP62;PIAS1
Syndecan 3 pathway	3/17	0.04416	0.387549	4.30744	13.4389	APH1A;APH1B;PSEN1
Zinc transporters	3/17	0.04416	0.387549	4.30744	13.4389	SLC39A14;SLC39A1;SLC39A3
Phase I of biological oxidations: functionalization of compounds	7/69	0.0449248	0.391131	2.27339	7.05379	CYP2C9;CYP2C8;CYP2B6;CYP2U1;CYP11B1;ACSS1;PTGS1
Transport of mature transcript to cytoplasm	6/55	0.0454245	0.392367	2.46467	7.62005	CPSF1;NUP50;NUP62;DHX38;NUP43;SRRM1
CDO in myogenesis	4/29	0.0467391	0.397318	3.21776	9.85656	TCF12;CTNNB1;TCF4;MEF2D
Messenger RNA splicing: minor pathway	5/42	0.0476426	0.397318	2.71886	8.27629	PRPF6;DDX23;POLR2D;SNRNP200;SF3B1
Signaling events mediated by T cell protein tyrosine phosphatase (TC-PTP)	5/42	0.0476426	0.397318	2.71886	8.27629	CSF1R;STAT1;GAB1;PIK3R1;PIAS1
CXCR4 signaling pathway	10/116	0.0493929	0.397318	1.90124	5.71885	BLK;RGS1;STAT1;PXN;LIMK1;PIK3R1;ITGA5;PAG1;NFKB1;SSH1
RNA polymerase II transcription	9/101	0.0507812	0.397318	1.97087	5.87364	NUDT21;CPSF7;RNGTT;CPSF1;ERCC3;POLR2D;DHX38;TAF6;SRRM1
Bone remodeling	3/18	0.051177	0.397318	4.02006	11.9495	TNFSF11;TNFRSF11A;NFKB1
Human cytomegalovirus and MAP kinase pathways	3/18	0.051177	0.397318	4.02006	11.9495	SP1;PIK3R1;NFKB1
Cleavage of growing transcript in the termination region	5/43	0.0518917	0.397318	2.64717	7.83192	NUDT21;CPSF7;CPSF1;DHX38;SRRM1
Innate immune system	22/319	0.0519098	0.397318	1.49689	4.42816	TICAM2;UBA7;PRKCSH;IGKV1-5;NFKB1;MAPK13;CYLD;IGLV1-51;CASP8;AIM2;C7;IRF3;PPP2R1A;CASP10;TXNIP;TLR10;TLR7;CCR6;MASP1;TLR5;LGMN;BIRC3
Glutamate binding and activation of AMPA receptors and synaptic plasticity	4/30	0.051979	0.397318	3.09384	9.14821	NSF;EPB41L1;AP2M1;GRIA4
Inactivation of GSK3 by Akt causes accumulation of beta-catenin in alveolar macrophages	4/30	0.051979	0.397318	3.09384	9.14821	APC;CTNNB1;PIK3R1;NFKB1
Ovarian infertility genes	4/30	0.051979	0.397318	3.09384	9.14821	NCOR1;ATM;PGR;ZP2
Bystander B cell activation	2/8	0.0521548	0.397318	6.6962	19.7775	CD40;CD40LG
CHL1 interactions	2/8	0.0521548	0.397318	6.6962	19.7775	NRP1;ANK1
RNA polymerase II C-terminal domain phosphorylation and interaction with capping enzyme	2/8	0.0521548	0.397318	6.6962	19.7775	RNGTT;ERCC3
Thiamine metabolism	2/8	0.0521548	0.397318	6.6962	19.7775	MTMR2;TPK1
Transcription factor regulation of microRNAs related to cardiac hypertrophy	2/8	0.0521548	0.397318	6.6962	19.7775	RASGRF1;NFKB1
Prolactin regulation of apoptosis	10/118	0.0543254	0.411	1.86584	5.43475	SMARCE1;SPRED1;PSMD2;ZSCAN26;TMBIM6;TNIK;TNFRSF11A;BACH2;TMEM106A;MATN2
HNF3A pathway	5/44	0.0563546	0.420847	2.57916	7.4179	POU2F1;SP1;NCOA3;NFIC;ESR1
Nucleotide excision repair	6/58	0.0563942	0.420847	2.32212	6.67698	DDB1;LIG1;ERCC3;POLR2D;ERCC5;DDB2
Activated NOTCH1 signaling in the nucleus	4/31	0.0575253	0.426387	2.97909	8.50689	APH1A;ADAM17;APH1B;PSEN1
TGF-beta signaling pathway	14/185	0.0581363	0.428024	1.65133	4.69799	KLF11;UBE2I;STAT1;PIK3R1;SMAD6;NFKB1;PIAS1;SMAD7;TGFBR2;MAPK13;SNW1;APC;SP1;CTNNB1
IGF-1 receptor and longevity	3/19	0.058697	0.429271	3.76861	10.6854	PIK3R1;FOXO3;SOD3
Interleukin-4 signaling pathway	9/104	0.0590927	0.429303	1.90833	5.39799	COL1A1;PIGR;FCER2;RETNLB;CD40LG;SP1;STAT1;PIK3R1;NFKB1
DNA repair	9/105	0.062046	0.447437	1.88835	5.24938	DDB1;RAD52;MBD4;LIG1;ERCC3;POLR2D;ATM;ERCC5;DDB2
Signaling by NGF	16/221	0.0624046	0.447437	1.57476	4.36858	RASGRF1;PIK3R1;ADCY1;PSEN1;FOXO3;NFKB1;ARHGAP4;MAPK13;APH1A;TIAM1;AKAP13;ADAM17;APH1B;PPP2R1A;ARHGEF1;AP2M1
Prothrombin activation intrinsic pathway	4/32	0.0633749	0.450931	2.87255	7.92446	ZFHX3;F2R;COL4A6;PRCP
Thymic stromal lymphopoietin (TSLP) pathway	8/90	0.0640152	0.450931	1.96448	5.39963	CD40;CCL22;LAMP3;PSME1;CCR6;TNFRSF11A;IL7R;CD276
Neurotrophic factor-mediated Trk receptor signaling	6/60	0.0645181	0.450931	2.23588	6.12811	TIAM1;RASGRF1;GAB1;ELMO1;PIK3R1;CRKL
Alpha-4 beta-7 integrin signaling	2/9	0.0649892	0.450931	5.7393	15.6886	PXN;CD44
Apoptotic signaling in response to DNA damage	3/20	0.0667033	0.450931	3.54674	9.60281	PARP1;STAT1;ATM
Estrogen receptor signaling pathway	3/20	0.0667033	0.450931	3.54674	9.60281	SP1;ESR1;NFKB1
N-glycan antennae elongation in the medial/trans-Golgi	3/20	0.0667033	0.450931	3.54674	9.60281	ST6GAL1;MGAT4A;ST3GAL4
Chemokine signaling pathway	14/189	0.066936	0.450931	1.61325	4.36225	CCL22;STAT1;PXN;PRKX;PIK3R1;ADCY1;FOXO3;CXCL14;NFKB1;CRKL;CXCL16;TIAM1;ELMO1;CCR6
T cell receptor signaling pathway	11/139	0.0671818	0.450931	1.73175	4.67633	CD40LG;CTLA4;PRKCQ;ASAP1;PIK3R1;PTPN7;ICOS;NFKB1;NFATC4;ARHGAP4;MAPK13
p53 signaling pathway	11/139	0.0671818	0.450931	1.73175	4.67633	RRM2B;APC;SP1;CASP10;SESN1;TP53BP2;IRF5;NDRG1;HIC1;SMARCA4;DDB2
Neural crest differentiation	8/91	0.0674135	0.450931	1.94071	5.23391	NOTCH2;TFAP2A;CTNNB1;TCF4;MSX1;RBPJ;NFKB1;FGFR1
FGF signaling pathway	6/61	0.068824	0.457575	2.19511	5.87455	STAT1;GAB1;PIK3R1;PSEN1;SSH1;FGFR1
PIP biosynthesis at the plasma membrane	4/33	0.0695239	0.459444	2.77335	7.39398	PIP4K2A;PIP4K2B;PIK3R1;MTM1
G alpha (12/13) signaling events	7/77	0.0728326	0.478427	2.01273	5.27252	AKAP13;TIAM1;RASGRF1;GNA12;ARHGEF1;PIK3R1;ARHGAP4
Signaling events mediated by focal adhesion kinase	6/62	0.0732923	0.478581	2.1558	5.63374	PXN;ELMO1;ASAP1;ITGA5;PIK3R1;ARHGAP26
T cell activation co-stimulatory signal	3/21	0.0751776	0.487987	3.34952	8.66824	CTLA4;PIK3R1;ICOS
Cdc25 and Chk1 regulatory pathway in response to DNA damage	2/10	0.0787432	0.505154	5.02162	12.7628	RASGRF1;ATM
Ganglio sphingolipid metabolism	2/10	0.0787432	0.505154	5.02162	12.7628	ST8SIA1;SLC33A1
Signaling by EGFR in cancer	9/111	0.0817182	0.51255	1.77671	4.44973	ADAM17;PXN;GAB1;PIK3R1;ADCY1;FOXO3;EPS15;AP2M1;PAG1
Amino acid and oligopeptide SLC transporters	5/49	0.0818571	0.51255	2.28547	5.72004	SLC1A2;SLC1A4;SLC1A5;SLC15A3;SLC38A4
Interleukin-5 signaling pathway	5/49	0.0818571	0.51255	2.28547	5.72004	SPRED1;STAT1;MAPT;PIK3R1;FOXO3
Integrated cancer pathway	4/35	0.0826995	0.51255	2.59415	6.46602	CASP8;MMP1;STAT1;ATM
Interleukin-2/PI3K pathway	4/35	0.0826995	0.51255	2.59415	6.46602	SGMS1;PIK3R1;FOXO3;NFKB1
Signal transduction by L1	4/35	0.0826995	0.51255	2.59415	6.46602	NRP1;ITGA5;AP2M1;FGFR1
AKT signaling pathway	3/22	0.0840999	0.515406	3.17307	7.85572	PIK3R1;FOXO3;NFKB1
Double-strand break repair	3/22	0.0840999	0.515406	3.17307	7.85572	RAD52;LIG1;ATM
Lipid metabolism regulation by peroxisome proliferator-activated receptor alpha (PPAR-alpha)	9/112	0.0853244	0.517889	1.75937	4.33032	MED24;NCOR1;CHD9;SIN3A;NCOA3;TXNRD1;NR1D1;RGL1;MED6
Apoptosis modulation and signaling	7/80	0.0854493	0.517889	1.92971	4.74675	BLK;CASP8;CASP10;BMF;CFLAR;NFKB1;BIRC3
PI3K/PLC/TRK pathway	4/36	0.0897139	0.518107	2.51295	6.05905	EPB41L1;GAB1;PIK3R1;FOXO3
Steroid hormone, vitamin A, and vitamin D metabolism	4/36	0.0897139	0.518107	2.51295	6.05905	STARD5;CYP11B1;GC;LGMN
Antigen processing and presentation	7/81	0.0899149	0.518107	1.90353	4.58539	RFX5;PSME1;KIR2DL1;HLA-DOA;HLA-DOB;TAPBP;LGMN
TSH regulation of gene expression	8/97	0.0900961	0.518107	1.8093	4.35476	NOTCH2;MAP3K3;TP53BP2;PIK3R1;CXCL14;GFRA2;IVL;CAMKK2
Jak-STAT signaling pathway	14/199	0.0926538	0.518107	1.52524	3.62836	PTPRS;CTF1;STAT1;IL11RA;IL10RA;PTPRJ;PIK3R1;PIAS1;PTPRD;SPRED2;SPRED1;LEPR;PTPN7;IL7R
B lymphocyte cell surface molecules	2/11	0.0933007	0.518107	4.46343	10.5869	CD40;FCGR2B
Down syndrome cell adhesion molecule (DSCAM) interactions	2/11	0.0933007	0.518107	4.46343	10.5869	DCC;MAPK13
Passive transport by aquaporins	2/11	0.0933007	0.518107	4.46343	10.5869	AQP5;AQP2
Recruitment of NuMA to mitotic centrosomes	2/11	0.0933007	0.518107	4.46343	10.5869	NUMA1;TUBGCP6
Signaling by VEGF	2/11	0.0933007	0.518107	4.46343	10.5869	NRP1;NRP2
Stress fiber formation mediated by Rho-selective guanine exchange factor AKAP13	2/11	0.0933007	0.518107	4.46343	10.5869	AKAP13;GNA12
Telomerase protein component gene hTERT transcriptional regulation	2/11	0.0933007	0.518107	4.46343	10.5869	SP1;ESR1
p38 gamma/delta MAPK pathway	2/11	0.0933007	0.518107	4.46343	10.5869	MAPT;MAPK13
Incretin biosynthesis, secretion, and inactivation	3/23	0.0934493	0.518107	3.01426	7.1448	CTNNB1;PAX6;FFAR1
Post-elongation processing of intronless pre-mRNA	3/23	0.0934493	0.518107	3.01426	7.1448	NUDT21;CPSF7;CPSF1
Proximal tubule bicarbonate reclamation	3/23	0.0934493	0.518107	3.01426	7.1448	GLS2;FXYD2;ATP1A2
Type I interferon (interferon-alpha/beta) pathway	5/51	0.0935143	0.518107	2.18588	5.17974	PTPRD;PTPRS;STAT1;PTPRJ;PTPN7
ATM-dependent DNA damage response	7/82	0.0945094	0.518384	1.87805	4.43042	WNT5B;APC;WNT7B;CCNG2;CTNNB1;ATM;FOXO3
Regular glucocorticoid receptor pathway	7/82	0.0945094	0.518384	1.87805	4.43042	POU1F1;SMARCC2;POU2F1;MMP1;STAT1;NFKB1;SMARCA4
ALK in cardiac myocytes	4/37	0.0970034	0.524682	2.43667	5.68478	APC;CTNNB1;SMAD6;TGFBR2
Allograft rejection	4/37	0.0970034	0.524682	2.43667	5.68478	CD40;CD40LG;HLA-DOA;HLA-DOB
Protein processing in the endoplasmic reticulum	12/166	0.0976598	0.524682	1.56974	3.65163	ATXN3L;SEC61A1;VCP;OS9;PRKCSH;EDEM1;EIF2AK1;DNAJC5;SYVN1;SSR1;PDIA6;HERPUD1
Telomerase regulation	6/67	0.0980413	0.524682	1.97857	4.59497	SIN3A;SP1;POT1;ATM;ESR1;NFKB1
Endocytosis	14/201	0.0984465	0.524682	1.50876	3.49768	CSF1R;F2R;ASAP1;SMAD6;SMAD7;EPN2;TGFBR2;EPN3;RABEP1;DNAJC6;MVB12B;EPS15;AP2M1;RAB7A
Senescence and autophagy	8/99	0.0985274	0.524682	1.76935	4.10032	COL1A1;IGFBP5;KMT2A;IRF5;CXCL14;SLC39A1;CD44;SLC39A3
Autoimmune thyroid disease	5/52	0.0996443	0.525528	2.13925	4.93344	CD40;CD40LG;CTLA4;HLA-DOA;HLA-DOB
Signaling events mediated by PTP1B	5/52	0.0996443	0.525528	2.13925	4.93344	BLK;DOK1;CSF1R;LEPR;PIK3R1
Adipogenesis	10/133	0.101571	0.528583	1.637	3.74382	KLF7;NCOR1;WNT5B;SP1;CELF1;STAT1;CTNNB1;MEF2D;LPIN2;PPARD
Dorso-ventral axis formation	3/24	0.103204	0.528583	2.87057	6.51921	NOTCH2;ETV7;PIWIL4
Inhibition of cellular proliferation by Gleevec	3/24	0.103204	0.528583	2.87057	6.51921	STAT1;PIK3R1;CRKL
Plexin D1 signaling	3/24	0.103204	0.528583	2.87057	6.51921	NRP1;PLXND1;ITGA5
Messenger RNA splicing: major pathway	6/68	0.103463	0.528583	1.94656	4.41584	NUDT21;CPSF7;CPSF1;HNRNPD;DHX38;SRRM1
ERBB4 signaling events	4/38	0.10456	0.528583	2.36488	5.33988	ADAM17;NCOR1;NRG3;PIK3R1
Nuclear receptors	4/38	0.10456	0.528583	2.36488	5.33988	NR1D2;PGR;ESR1;PPARD
Signaling of hepatocyte growth factor receptor	4/38	0.10456	0.528583	2.36488	5.33988	PXN;GAB1;PIK3R1;CRKL
Transport of mature mRNAs derived from intronless transcripts	4/38	0.10456	0.528583	2.36488	5.33988	CPSF1;NUP50;NUP62;NUP43
Thrombin signaling through protease-activated receptors	5/53	0.105971	0.530325	2.09458	4.70147	F2R;GNA12;ARHGEF1;ADCY1;PIK3R1
Beta-arrestins in GPCR desensitization	2/12	0.108555	0.530325	4.01688	8.91949	ADCY1;AP2M1
Inhibition of replication initiation of damaged DNA by RB1/E2F1	2/12	0.108555	0.530325	4.01688	8.91949	PPP2R1A;PPP2R3B
NF-kappaB activation through FADD/RIP-1 pathway	2/12	0.108555	0.530325	4.01688	8.91949	CASP8;CASP10
Nucleotide G-protein coupled receptors (GPCRs)	2/12	0.108555	0.530325	4.01688	8.91949	P2RY1;SPECC1L
SODD/TNFR1 signaling pathway	2/12	0.108555	0.530325	4.01688	8.91949	CASP8;BIRC3
Toll-like receptor endosomal trafficking and processing	2/12	0.108555	0.530325	4.01688	8.91949	TLR7;LGMN
p53 activity regulation	9/118	0.108919	0.530325	1.66199	3.68489	YY1;CASP8;RRM2B;SESN1;CCNG2;SMYD2;HUWE1;ATM;DDB2
TNF-alpha effects on cytokine activity, cell motility, and apoptosis	10/135	0.109256	0.530325	1.61064	3.56606	KLF7;CD40;CD40LG;FNBP1;ITGA5;CFLAR;IL7R;FLI1;CD44;BIRC3
Signaling events regulated by Ret tyrosine kinase	4/39	0.112376	0.540584	2.29719	5.02145	DOK1;PXN;GAB1;PIK3R1
Kit receptor signaling pathway	5/54	0.112489	0.540584	2.05172	4.48281	DOK1;STAT1;MAPT;PIK3R1;FOXO3
Immunoregulatory interactions between a lymphoid and a non-lymphoid cell	9/119	0.113175	0.540584	1.6468	3.58808	CD40;CD200R1;IGLV1-51;CD40LG;IGKV1-5;KIR2DL1;FCGR2B;CD34;MICA
Metal ion solute carrier family (SLC) transporters	3/25	0.11334	0.540584	2.73994	5.96585	SLC39A1;SLC39A14;SLC39A3
Antiviral mechanism by interferon-stimulated genes	6/70	0.114764	0.542657	1.88553	4.08193	IRF3;UBA7;STAT1;NUP50;NUP62;NUP43
Signaling events mediated by VEGFR1 and VEGFR2	6/70	0.114764	0.542657	1.88553	4.08193	PXN;GAB1;CTNNB1;PTPRJ;PIK3R1;CAMKK2
Basal cell carcinoma	5/55	0.119196	0.553931	2.01058	4.27649	WNT5B;APC;WNT7B;CTNNB1;GLI2
Mitotic G2-G2/M phases	7/87	0.119379	0.553931	1.76021	3.74123	CEP57;NUMA1;PPP2R1A;NDE1;CNTRL;TUBGCP6;CKAP5
RIG-I-like receptor signaling pathway	6/71	0.120639	0.553931	1.85642	3.92625	CYLD;CASP8;IRF3;CASP10;NFKB1;MAPK13
Actin cytoskeleton regulation	15/226	0.120744	0.553931	1.43237	3.02815	F2R;PXN;LIMK1;PIK3R1;CRKL;SSH1;TIAM1;APC;GNA12;PIP4K2A;PIP4K2B;ARHGEF1;ITGA5;WASF2;FGFR1
Chagas disease	8/104	0.121471	0.553931	1.67675	3.53473	CASP8;PPP2R1A;PIK3R1;ADCY1;CFLAR;NFKB1;TGFBR2;MAPK13
Interaction between L1-type proteins and ankyrins	3/26	0.123836	0.553931	2.62068	5.47407	KCNQ2;ANK2;ANK1
TGF-beta signaling in development	3/26	0.123836	0.553931	2.62068	5.47407	SMAD6;SMAD7;TGFBR2
YAP1- and WWTR1 (TAZ)-stimulated gene expression	3/26	0.123836	0.553931	2.62068	5.47407	CHD9;NCOA3;TBX5
Glucose-dependent insulinotropic polypeptide (GIP) biosynthesis, secretion, and inactivation	2/13	0.124406	0.553931	3.65152	7.61051	PAX6;FFAR1
Interleukin-22 soluble receptor signaling pathway	2/13	0.124406	0.553931	3.65152	7.61051	STAT1;IL10RA
Irinotecan pathway	2/13	0.124406	0.553931	3.65152	7.61051	APC;CES2
N-glycan trimming in the ER and calnexin/calreticulin cycle	2/13	0.124406	0.553931	3.65152	7.61051	PRKCSH;EDEM1
Purine salvage	2/13	0.124406	0.553931	3.65152	7.61051	AMPD1;AMPD3
TACI and BCMA stimulation of B cell immune responses	2/13	0.124406	0.553931	3.65152	7.61051	TNFRSF17;NFKB1
HIF-1 degradation in normoxia	7/88	0.124723	0.553931	1.73838	3.61873	OS9;USP20;PSMD13;PSMD2;PSME1;HIF1AN;MAPK13
Biological oxidations	10/139	0.125587	0.55552	1.56037	3.23738	GGT5;CYP2C9;CYP2C8;CYP2B6;CYP2U1;CYP11B1;UGT2B28;ACSS1;GSTM5;PTGS1
Amoebiasis	8/105	0.126372	0.555778	1.65938	3.43247	COL1A1;COL4A6;SERPINB9;PRKX;PIK3R1;ADCY1;NFKB1;RAB7A
Costimulation by the CD28 family	6/72	0.126659	0.555778	1.8282	3.77753	PPP2R1A;BTLA;CTLA4;TNFRSF14;PIK3R1;ICOS
Cytokine-cytokine receptor interaction	17/265	0.129398	0.565538	1.3814	2.82477	CSF1R;CD40;CTF1;CCL22;IL11RA;IL10RA;TNFRSF11A;CXCL14;CXCL16;TGFBR2;CD40LG;LEPR;TNFSF11;TNFRSF17;TNFRSF14;CCR6;IL7R
Degradation of beta-catenin by the destruction complex	6/73	0.132822	0.572597	1.80082	3.6354	APC;PPP2R1A;PSMD13;PSMD2;PSME1;CTNNB1
Keratinocyte differentiation	5/57	0.133154	0.572597	1.93305	3.89751	SP1;PRKCQ;NFKB1;BIRC3;MAPK13
CTCF pathway	3/27	0.134667	0.572597	2.51135	5.03513	PIK3R1;SMAD6;TGFBR2
Oxidative stress	3/27	0.134667	0.572597	2.51135	5.03513	SP1;SOD3;NFKB1
Proteins and DNA sequences in cardicac structures	3/27	0.134667	0.572597	2.51135	5.03513	SMAD6;TBX5;NFATC4
TWEAK regulation of gene expression	3/27	0.134667	0.572597	2.51135	5.03513	COL1A1;MMP1;TNFSF11
VEGFR1 pathway	3/27	0.134667	0.572597	2.51135	5.03513	NRP1;NRP2;PIK3R1
Wnt signaling pathway	15/231	0.137322	0.580518	1.39884	2.77729	TLE3;WNT5B;WNT7B;F2R;PRKX;PSEN1;NFATC4;SMARCA4;SFRP1;DAAM1;APC;PPP2R1A;CTNNB1;PRKCQ;PPARD
E2F transcription factor network	6/74	0.139124	0.580518	1.77424	3.49949	YY1;SP1;ATM;TOPBP1;HIC1;CES2
Initiation of the second proteolytic cleavage of Notch receptor by receptor-ligand binding	2/14	0.140764	0.580518	3.34705	6.56246	NOTCH2;ADAM17
Interferon gamma signaling regulation	2/14	0.140764	0.580518	3.34705	6.56246	STAT1;PIAS1
Interleukin-6 regulation of target genes	2/14	0.140764	0.580518	3.34705	6.56246	ABCC4;ITGA5
Lectin-induced complement pathway	2/14	0.140764	0.580518	3.34705	6.56246	C7;MASP1
Osteoblast signaling	2/14	0.140764	0.580518	3.34705	6.56246	COL1A1;TNFSF11
T cell receptor/JNK pathway	2/14	0.140764	0.580518	3.34705	6.56246	DBNL;CRKL
Pathways in cancer	20/325	0.143323	0.58886	1.3217	2.5676	CSF1R;WNT5B;STAT1;DCC;MMP1;WNT7B;PIK3R1;NFKB1;CRKL;RUNX1;GLI2;PIAS1;TGFBR2;CASP8;APC;COL4A6;CTNNB1;PPARD;FGFR1;BIRC3
Dual incision reaction in TC-NER	3/28	0.145811	0.59337	2.41077	4.64181	ERCC3;POLR2D;ERCC5
Messenger RNA capping	3/28	0.145811	0.59337	2.41077	4.64181	RNGTT;ERCC3;POLR2D
Beta-3 integrin cell surface interactions	4/43	0.146044	0.59337	2.06115	3.96534	COL1A1;COL4A6;CD47;TGFBR2
RIG-I/MDA5-mediated induction of interferon-alpha/beta pathways	6/76	0.152135	0.60009	1.72337	3.24507	CYLD;CASP8;IRF3;UBA7;CASP10;NFKB1
Transcription	12/181	0.153618	0.60009	1.42928	2.67745	NUDT21;CPSF7;POU2F1;RRN3;RNGTT;CPSF1;ERCC3;NFIC;POLR2D;DHX38;TAF6;SRRM1
Gastrin pathway	4/44	0.155013	0.60009	2.00951	3.74623	CTNNB1;NFKB1;CD44;BIRC3
PI3K events in ERBB2 signaling	4/44	0.155013	0.60009	2.00951	3.74623	NRG3;GAB1;PIK3R1;FOXO3
Vasopressin-regulated water reabsorption	4/44	0.155013	0.60009	2.00951	3.74623	NSF;CREB3L2;PRKX;AQP2
Signaling by FGFR in disease	9/128	0.155452	0.60009	1.52153	2.83219	PPP2R1A;STAT1;CNTRL;MYO18A;GAB1;PIK3R1;ADCY1;FOXO3;FGFR1
Antigen presentation: folding, assembly, and peptide loading of class I MHC proteins	16/255	0.157166	0.60009	1.3483	2.49497	UBA7;PSMD13;ERAP1;HUWE1;ASB13;RNF6;UBE2Z;TAPBP;KLHL9;SEC61A1;PSMD2;FBXO4;PSME1;ASB7;DZIP3;RNF220
IGF1 pathway	3/29	0.157242	0.60009	2.31793	4.2881	PXN;PIK3R1;CRKL
Reelin signaling pathway	3/29	0.157242	0.60009	2.31793	4.2881	PIK3R1;MAPT;CRKL
HIV infection	13/200	0.157301	0.60009	1.3995	2.5885	RNGTT;LIG1;PSMD13;ERCC3;PSMD2;NUP50;NUP62;POLR2D;PSME1;ELMO1;NUP43;TAF6;AP2M1
Activation of IRF3/IRF7 mediated by TBK1/IKK epsilon	2/15	0.157544	0.60009	3.08942	5.7094	TICAM2;IRF3
Extrinsic prothrombin activation pathway	2/15	0.157544	0.60009	3.08942	5.7094	ZFHX3;F2R
Fibrinolysis pathway	2/15	0.157544	0.60009	3.08942	5.7094	ZFHX3;F2R
Glycosphingolipid biosynthesis: ganglio series	2/15	0.157544	0.60009	3.08942	5.7094	ST8SIA1;SLC33A1
Glycosylation of mammalian N-linked oligosaccarides	2/15	0.157544	0.60009	3.08942	5.7094	ST3GAL4;MAN2B1
Mechanisms of transcriptional repression by DNA methylation	2/15	0.157544	0.60009	3.08942	5.7094	SIN3A;MBD1
PRC2 complex long-term gene silencing through modification of histone tails	2/15	0.157544	0.60009	3.08942	5.7094	YY1;EZH1
Sema3A/PAK-dependent axon repulsion	2/15	0.157544	0.60009	3.08942	5.7094	NRP1;LIMK1
Transcriptional regulation of white adipocyte differentiation	6/77	0.158837	0.602921	1.699	3.12596	MED24;NCOR1;CHD9;NCOA3;MED6;NFKB1
Cytochrome P450 pathway	5/61	0.163104	0.616805	1.7946	3.25427	CYP2C9;CYP2C8;CYP2B6;CYP2U1;CYP11B1
Integrin-linked kinase signaling	4/45	0.164181	0.616805	1.9604	3.54201	PARP1;PXN;CTNNB1;CKAP5
Wnt interactions in lipid metabolism and immune response	4/45	0.164181	0.616805	1.9604	3.54201	UBE2I;MMP1;TCF4;ARHGAP4
G-protein signaling pathways	7/95	0.165356	0.619097	1.59951	2.87857	AKAP13;AKAP10;GNA12;ARHGEF1;PRKCQ;ADCY1;PDE7A
Inflammatory response pathway	3/30	0.168938	0.626097	2.23196	3.96893	COL1A1;CD40;CD40LG
TNFR1 signaling pathway	3/30	0.168938	0.626097	2.23196	3.96893	CASP8;PARP1;BIRC3
p38-alpha and p38-beta regulation	3/30	0.168938	0.626097	2.23196	3.96893	BLK;MAP3K3;DUSP10
Colorectal cancer	5/62	0.170982	0.630307	1.76302	3.11384	APC;DCC;CTNNB1;PIK3R1;TGFBR2
RhoA activity regulation	4/46	0.17354	0.630307	1.91362	3.35142	AKAP13;OPHN1;ARHGEF1;ARHGAP4
Syndecan 1 pathway	4/46	0.17354	0.630307	1.91362	3.35142	COL1A1;MMP1;COL6A1;COL4A6
Inhibition of platelet activation by aspirin	2/16	0.17467	0.630307	2.8686	5.00528	F2R;PTGS1
Interleukin-10 anti-inflammatory signaling pathway	2/16	0.17467	0.630307	2.8686	5.00528	STAT1;IL10RA
Interleukin-9 signaling pathway	2/16	0.17467	0.630307	2.8686	5.00528	STAT1;PIK3R1
Nucleotide-like (purinergic) G-protein coupled receptors	2/16	0.17467	0.630307	2.8686	5.00528	P2RY14;P2RY1
Rb tumor suppressor/checkpoint signaling in response to DNA damage	2/16	0.17467	0.630307	2.8686	5.00528	RASGRF1;ATM
Interferon signaling	11/168	0.176353	0.633928	1.40971	2.44621	SP100;UBA7;IRF3;STAT1;NUP50;NUP62;ADAR;IRF5;NUP43;CD44;PIAS1
Lipid and lipoprotein metabolism	28/489	0.177382	0.633928	1.22457	2.11782	MTMR2;SGMS1;CHD9;PIK3R1;MTM1;PTDSS1;GM2A;SIN3A;INPP5E;PIP4K2A;PIP4K2B;GC;TPTE2;STARD5;TXNRD1;NCOA3;NR1D1;MED6;FIG4;MED24;NCOR1;VAPA;CYP11B1;AGPS;ACOX3;RGL1;LPIN2;LGMN
Phospholipid metabolism	13/205	0.17818	0.633928	1.36269	2.3506	TPTE2;MTMR2;SGMS1;PIK3R1;MTM1;FIG4;PTDSS1;GM2A;VAPA;INPP5E;PIP4K2A;PIP4K2B;LPIN2
BDNF signaling pathway	16/261	0.179289	0.633928	1.31486	2.25993	PNISR;IGFBP5;NUMA1;ATP10D;NR1D2;ESRRG;FOXO3;SLC39A14;HERPUD1;PTGS1;TGFBR2;PTDSS1;C7;DCX;TXNIP;SSR1
Transmembrane transport of small molecules	25/432	0.179609	0.633928	1.238	2.12561	ATP10D;SLC1A2;SLC1A4;ATP1A2;ADCY1;AQP5;SLC1A5;AQP2;GABRR3;SLC22A18;NUP62;NUP43;SLC15A3;SLC39A1;SLC39A3;SLC38A4;ABCC4;ABCA6;SLC33A1;ABCA8;SLC39A14;FXYD2;NUP50;SLC9A9;SLC27A6
Nuclear beta-catenin signaling and target gene transcription regulation	6/80	0.179681	0.633928	1.62987	2.79778	APC;CDX1;CTNNB1;TCF4;TNIK;SMARCA4
Immune system signaling by interferons, interleukins, prolactin, and growth hormones	17/280	0.180216	0.633928	1.30157	2.23038	MAP3K3;SP100;UBA7;STAT1;ADAR;PIK3R1;NFKB1;CRKL;PIAS1;ADAM17;IRF3;NUP50;NUP62;IRF5;NUP43;IL7R;CD44
Alpha-V beta-3 integrin/OPN pathway	3/31	0.180875	0.633928	2.15213	3.68004	PIK3R1;NFKB1;CD44
Amino acid transport across the plasma membrane	3/31	0.180875	0.633928	2.15213	3.68004	SLC1A4;SLC1A5;SLC38A4
Signaling by the B cell receptor (BCR)	10/151	0.18187	0.635388	1.42666	2.43169	BLK;IGLV1-51;PSMD13;PSMD2;IGKV1-5;PSME1;REL;PIK3R1;FOXO3;NFKB1
Regulation of NFAT transcription factors	4/47	0.183076	0.635552	1.86902	3.17332	POU2F1;CD40LG;CTLA4;PRKCQ
Regulation of transcription by NOTCH1 intracellular domain	4/47	0.183076	0.635552	1.86902	3.17332	TLE3;NCOR1;SNW1;RBPJ
MAPK cascade role in angiogenesis	5/64	0.187164	0.641678	1.70308	2.85396	NRP1;PLXND1;APC;PXN;FGFR1
Cell to cell adhesion signaling	2/17	0.192072	0.641678	2.67722	4.4171	PXN;CTNNB1
Complement activation, classical pathway	2/17	0.192072	0.641678	2.67722	4.4171	C7;MASP1
Endocytotic role of NDK, phosphins and dynamin	2/17	0.192072	0.641678	2.67722	4.4171	EPS15;AP2M1
Inflammasomes	2/17	0.192072	0.641678	2.67722	4.4171	AIM2;TXNIP
Insulin-like growth factor (IGF) activity regulation by insulin-like growth factor binding proteins (IGFBPs)	2/17	0.192072	0.641678	2.67722	4.4171	IGFBP5;MMP1
Ion channel function in vascular endothelium	2/17	0.192072	0.641678	2.67722	4.4171	KCNQ2;ADCY1
Osteoclast signaling	2/17	0.192072	0.641678	2.67722	4.4171	TNFSF11;TNFRSF11A
Phenylalanine metabolism	2/17	0.192072	0.641678	2.67722	4.4171	IL4I1;PAH
Post-chaperonin tubulin folding pathway	2/17	0.192072	0.641678	2.67722	4.4171	TBCE;TBCD
Synaptic proteins at the synaptic junction	2/17	0.192072	0.641678	2.67722	4.4171	ANK1;ADD1
HES/HEY pathway	4/48	0.19278	0.641678	1.82645	3.00671	YY1;NCOR1;PARP1;RBPJ
Alanine, aspartate and glutamate metabolism	3/32	0.19303	0.641678	2.07781	3.41782	ALDH4A1;IL4I1;GLS2
Netrin-mediated signaling events	3/32	0.19303	0.641678	2.07781	3.41782	DCC;ELMO1;PIK3R1
HIV life cycle	8/118	0.198734	0.653149	1.46227	2.36271	RNGTT;LIG1;ERCC3;NUP50;NUP62;POLR2D;NUP43;TAF6
T cell signal transduction	6/83	0.20155	0.653149	1.56612	2.50848	MAP3K3;CTLA4;PRKCQ;NFKB1;MAPK13;NFATC4
Angiopoietin receptor Tie2-mediated signaling	4/49	0.202639	0.653149	1.78576	2.85067	PXN;ITGA5;PIK3R1;NFKB1
Arf6 integrin-mediated signaling pathway	4/49	0.202639	0.653149	1.78576	2.85067	EXOC7;EXOC4;CTNNB1;ITGA5
G alpha 12 pathway	4/49	0.202639	0.653149	1.78576	2.85067	MAP3K3;PXN;MEF2D;MAPK13
Interleukin-4 regulation of apoptosis	16/267	0.202882	0.653149	1.28302	2.04659	ST6GAL1;CCL22;ST8SIA1;STAT1;TPK1;IL10RA;SPINT2;CD1C;ZDHHC17;FCER2;DAAM1;LRRTM2;TP53BP2;TNIK;GAS6;IL7R
Negative regulators of RIG-I/MDA5 signaling	3/33	0.205381	0.653149	2.00845	3.17915	CYLD;UBA7;IRF3
Axon guidance	19/325	0.206249	0.653149	1.2501	1.9735	NRP1;NRP2;CD72;PLXND1;DCC;LIMK1;ANK2;ANK1;GFRA2;NFATC4;COL1A1;KCNQ2;COL6A1;DCX;SLIT1;PRKCQ;ITGA5;AP2M1;FGFR1
ECM-receptor interaction	6/84	0.209047	0.653149	1.54596	2.41972	COL1A1;COL6A1;COL4A6;CD47;ITGA5;CD44
Small cell lung cancer	6/84	0.209047	0.653149	1.54596	2.41972	COL4A6;PIK3R1;FHIT;NFKB1;PIAS1;BIRC3
CBL signaling regulation	2/18	0.209684	0.653149	2.50976	3.92063	PIK3R1;CRKL
Corticosteroids and cardioprotection	2/18	0.209684	0.653149	2.50976	3.92063	PIK3R1;NFKB1
Effect of METS on macrophage differentiation	2/18	0.209684	0.653149	2.50976	3.92063	CSF1R;SIN3A
Nicotinic acetylcholine receptor role in the regulation of apoptosis	2/18	0.209684	0.653149	2.50976	3.92063	PIK3R1;FOXO3
Nucleotide di- and triphosphate biosynthesis and interconversion	2/18	0.209684	0.653149	2.50976	3.92063	RRM2B;TXNRD1
Pre-NOTCH processing in Golgi	2/18	0.209684	0.653149	2.50976	3.92063	NOTCH2;ST3GAL4
Transcriptional activity regulation by PML	2/18	0.209684	0.653149	2.50976	3.92063	SP100;UBE2I
Interleukin-1 regulation of extracellular matrix	8/120	0.211142	0.653149	1.436	2.23331	MMP1;TXNRD1;AMPD3;SOD3;NFKB1;RUNX1;BIRC3;MATN2
G alpha 13 pathway	5/67	0.212407	0.653149	1.62041	2.51043	PXN;ARHGEF1;PRKCQ;PHKA2;NFKB1
SLC-mediated transmembrane transport	15/251	0.215219	0.653149	1.27894	1.96457	SLC33A1;SLC1A2;SLC1A4;SLC1A5;SLC39A14;SLC22A18;NUP50;SLC9A9;NUP62;SLC27A6;NUP43;SLC15A3;SLC39A1;SLC39A3;SLC38A4
ATM-mediated phosphorylation of repair proteins	1/5	0.216003	0.653149	5.01739	7.68896	ATM
Axonal growth stimulation	1/5	0.216003	0.653149	5.01739	7.68896	ARHGEF1
CREB phosphorylation through the activation of adenylate cyclase	1/5	0.216003	0.653149	5.01739	7.68896	ADCY1
Cleavage of a damaged pyrimidine	1/5	0.216003	0.653149	5.01739	7.68896	MBD4
Cytochrome P450 metabolism of miscellaneous substrates	1/5	0.216003	0.653149	5.01739	7.68896	CYP2U1
Electric transmission across gap junctions	1/5	0.216003	0.653149	5.01739	7.68896	PANX2
GDP-mannose biosynthesis	1/5	0.216003	0.653149	5.01739	7.68896	PMM2
Insulin receptor substrate (IRS) activation	1/5	0.216003	0.653149	5.01739	7.68896	DOK1
Maturation of Notch precursor via proteolytic cleavage	1/5	0.216003	0.653149	5.01739	7.68896	NOTCH2
Asparagine N-linked glycosylation	6/85	0.216642	0.653149	1.52631	2.33451	ST6GAL1;PRKCSH;EDEM1;MGAT4A;PMM2;ST3GAL4
NOD signaling pathway	6/85	0.216642	0.653149	1.52631	2.33451	CYLD;CASP8;AIM2;NFKB1;BIRC3;MAPK13
Fructose and mannose metabolism	3/34	0.217904	0.653149	1.94356	2.9614	MTMR2;AKR1B10;PMM2
Interleukin-7 interactions in immune response	3/34	0.217904	0.653149	1.94356	2.9614	FCER2;CCL22;CASP10
N-cadherin signaling events	3/34	0.217904	0.653149	1.94356	2.9614	CTNNB1;PIK3R1;FGFR1
Nuclear receptors in lipid metabolism and toxicity	3/34	0.217904	0.653149	1.94356	2.9614	CYP2C9;CYP2B6;PPARD
MHC class II antigen presentation	7/103	0.217915	0.653149	1.4656	2.23307	KIF5C;CTSH;HLA-DOA;HLA-DOB;AP2M1;LGMN;RAB7A
Activation of NF-kappaB in B cells	5/68	0.221054	0.657003	1.59461	2.40682	PSMD13;PSMD2;PSME1;REL;NFKB1
Glutathione metabolism	4/51	0.222783	0.657003	1.70959	2.56705	GGT5;RRM2B;ANPEP;GSTM5
Toll receptor cascades	10/159	0.224792	0.657003	1.34949	2.01423	TICAM2;UBE2I;IRF3;PPP2R1A;TLR10;TLR7;UBE2Z;TLR5;NFKB1;LGMN
Apoptosis modulation by HSP70	2/19	0.227447	0.657003	2.362	3.49774	CASP8;NFKB1
Calcineurin in effects in keratinocyte differentiation	2/19	0.227447	0.657003	2.362	3.49774	SP1;NFATC4
Cell cycle progression regulation by PLK3	2/19	0.227447	0.657003	2.362	3.49774	RASGRF1;ATM
Eicosanoid biosynthesis	2/19	0.227447	0.657003	2.362	3.49774	ALOX15B;PTGS1
Hypoxic and oxygen homeostasis regulation of HIF-1-alpha	2/19	0.227447	0.657003	2.362	3.49774	OS9;HIF1AN
Mitochondrial gene expression	2/19	0.227447	0.657003	2.362	3.49774	SP1;HCFC1
PTEN-dependent cell cycle arrest and apoptosis	2/19	0.227447	0.657003	2.362	3.49774	PIK3R1;FOXO3
Resolution of abasic sites (AP sites)	2/19	0.227447	0.657003	2.362	3.49774	MBD4;LIG1
Signaling by constitutively active EGFR	2/19	0.227447	0.657003	2.362	3.49774	GAB1;PIK3R1
Tamoxifen metabolism	2/19	0.227447	0.657003	2.362	3.49774	CYP2C9;CYP2C8
NFAT involvement in hypertrophy of the heart	5/69	0.229805	0.657003	1.56961	2.30815	CTF1;PIK3R1;ALOX15B;CAMKK2;NFATC4
Rho GTPase cycle	8/123	0.230291	0.657003	1.39832	2.05331	TIAM1;AKAP13;OPHN1;RASGRF1;RHOF;ARHGAP15;ARHGAP26;ARHGAP4
Base excision repair	3/35	0.23058	0.657003	1.88272	2.76225	MBD4;LIG1;PARP1
EGF receptor (ErbB1) signaling pathway	3/35	0.23058	0.657003	1.88272	2.76225	STAT1;GAB1;PIK3R1
Interleukin-7 signaling pathway	3/35	0.23058	0.657003	1.88272	2.76225	STAT1;PIK3R1;IL7R
Linoleic acid metabolism	3/35	0.23058	0.657003	1.88272	2.76225	CYP2C9;CYP2C8;AKR1B10
Endometrial cancer	4/52	0.233044	0.662305	1.67389	2.43806	APC;CTNNB1;PIK3R1;FOXO3
MAPK signaling pathway	18/314	0.238233	0.66944	1.22365	1.75534	MAP3K3;STAT1;RASGRF1;PRKX;CACNA2D4;NFKB1;CRKL;NFATC4;TGFBR2;MAPK13;CASP8;DUSP10;GNA12;NF1;MAPT;PTPN7;MEF2D;FGFR1
Hedgehog signaling pathway	5/70	0.238654	0.66944	1.54538	2.21413	WNT5B;SIN3A;WNT7B;PRKX;GLI2
ERBB1 downstream pathway	7/106	0.239019	0.66944	1.42096	2.0337	EPS8;PPP2R1A;STAT1;ABI1;GAB1;PIK3R1;WASF2
Glycogen metabolism	3/36	0.243386	0.66944	1.82557	2.57973	PPP2R1A;PPP2R3B;PHKA2
Ion transport by P-type ATPases	3/36	0.243386	0.66944	1.82557	2.57973	FXYD2;ATP10D;ATP1A2
Transport to the Golgi and subsequent modification	3/36	0.243386	0.66944	1.82557	2.57973	ST6GAL1;MGAT4A;ST3GAL4
Interleukin-1 signaling pathway	8/125	0.243388	0.66944	1.37427	1.94198	MAP3K3;TICAM2;UBE2I;REL;PIK3R1;UBE2Z;NFKB1;MAPK13
Androgen receptor regulation of biosynthesis and transcription	4/53	0.243418	0.66944	1.63964	2.31678	SMARCE1;POU2F1;REL;KAT7
JNK/MAPK pathway	4/53	0.243418	0.66944	1.63964	2.31678	MAP3K3;DUSP10;GAB1;MEF2D
Protein folding	4/53	0.243418	0.66944	1.63964	2.31678	USP11;TBCE;FBXO4;TBCD
Acute myocardial infarction	2/20	0.245307	0.66944	2.23066	3.13462	F2R;COL4A6
Peroxisomal lipid metabolism	2/20	0.245307	0.66944	2.23066	3.13462	AGPS;ACOX3
RNA polymerase III abortive and retractive initiation	2/20	0.245307	0.66944	2.23066	3.13462	POU2F1;NFIC
Interleukin-6 signaling pathway	5/71	0.247595	0.66944	1.52189	2.1245	STAT1;GAB1;TNFSF11;PIK3R1;PIAS1
Rac1 cell motility signaling pathway	5/71	0.247595	0.66944	1.52189	2.1245	LIMK1;ABI1;CTNNB1;PIK3R1;WASF2
Viral myocarditis	5/71	0.247595	0.66944	1.52189	2.1245	CD40;CASP8;CD40LG;HLA-DOA;HLA-DOB
Neurotrophin signaling pathway	8/126	0.250027	0.66944	1.36255	1.88875	MAP3K3;GAB1;PIK3R1;PSEN1;FOXO3;NFKB1;CRKL;MAPK13
ADP signalling through P2Y purinoceptor 1	1/6	0.253252	0.66944	4.0137	5.51229	P2RY1
Alternative NF-kappaB pathway	1/6	0.253252	0.66944	4.0137	5.51229	NFKB1
Basic mechanisms of SUMOylation	1/6	0.253252	0.66944	4.0137	5.51229	UBE2I
ER quality control compartment (ERQC)	1/6	0.253252	0.66944	4.0137	5.51229	EDEM1
Fas signaling pathway in hepatocytes	1/6	0.253252	0.66944	4.0137	5.51229	CASP8
Klotho-mediated ligand binding	1/6	0.253252	0.66944	4.0137	5.51229	FGFR1
Methionine salvage pathway	1/6	0.253252	0.66944	4.0137	5.51229	MTAP
NF-kappaB activation	1/6	0.253252	0.66944	4.0137	5.51229	NFKB1
Nicotine metabolism	1/6	0.253252	0.66944	4.0137	5.51229	CYP2B6
Pre-NOTCH Processing in the endoplasmic reticulum	1/6	0.253252	0.66944	4.0137	5.51229	NOTCH2
Pregnenolone biosynthesis	1/6	0.253252	0.66944	4.0137	5.51229	STARD5
Small interfering RNA (siRNA) biogenesis	1/6	0.253252	0.66944	4.0137	5.51229	AGO1
RANKL signaling pathway	4/54	0.253892	0.669518	1.60677	2.20263	TNFSF11;PIK3R1;TNFRSF11A;NFKB1
Activation of NMDA receptor upon glutamate binding and postsynaptic events	3/37	0.256302	0.670266	1.77179	2.41211	RASGRF1;ADCY1;GRIA4
FRA pathway	3/37	0.256302	0.670266	1.77179	2.41211	MMP1;SP1;IVL
Interleukin-23-mediated signaling events	3/37	0.256302	0.670266	1.77179	2.41211	STAT1;PIK3R1;NFKB1
Leishmaniasis	5/72	0.25662	0.670266	1.49909	2.03901	STAT1;HLA-DOA;HLA-DOB;NFKB1;MAPK13
Cytosolic sensors of pathogen-associated DNA	2/21	0.263215	0.680076	2.11315	2.82059	IRF3;NFKB1
E-cadherin keratinocyte pathway	2/21	0.263215	0.680076	2.11315	2.82059	CTNNB1;PIK3R1
Mitochondrial role in apoptotic signaling	2/21	0.263215	0.680076	2.11315	2.82059	CASP8;BIRC3
PKC-catalyzed phosphorylation of inhibitory phosphoprotein of myosin phosphatase	2/21	0.263215	0.680076	2.11315	2.82059	GNA12;ARHGEF1
HIV factor interactions with host	8/128	0.263475	0.680076	1.3397	1.78689	PSMD13;PSMD2;NUP50;NUP62;ELMO1;PSME1;NUP43;AP2M1
Meiotic synapsis	4/55	0.264457	0.681007	1.57518	2.09511	UBE2I;STAG3;POT1;SYNE1
Chronic myeloid leukemia	5/73	0.265722	0.681069	1.47697	1.95743	PIK3R1;NFKB1;CRKL;RUNX1;TGFBR2
Myc repressed pathway	5/73	0.265722	0.681069	1.47697	1.95743	SFRP1;SP1;CFLAR;FOXO3;NDRG1
Leptin influence on immune response	7/110	0.268113	0.68263	1.36549	1.79746	COL1A1;TNFSF11;IL16;IL7R;FCGR2B;NFKB1;CXCL16
Signaling events mediated by HDAC class II	3/38	0.269308	0.68263	1.72107	2.25787	UBE2I;NUP62;ESR1
FSH regulation of apoptosis	15/263	0.269597	0.68263	1.21628	1.59433	IGFBP5;STAT1;PRKX;CFLAR;PHKA2;ESR1;SMARCA4;TGFBR2;PPP2R1A;DNAJC5;LEPR;RAD17;TMBIM6;MAPRE2;PPFIA4
Adherens junction cell adhesion	5/74	0.274896	0.68263	1.45549	1.87956	CTNNB1;PTPRJ;WASF2;TGFBR2;FGFR1
RANKL regulation of apoptosis and immune response	5/74	0.274896	0.68263	1.45549	1.87956	CASP10;TXNIP;TNFRSF11A;ESR1;CD44
Cytosolic DNA-sensing pathway	4/56	0.2751	0.68263	1.5448	1.99375	AIM2;IRF3;ADAR;NFKB1
Thromboxane A2 receptor signaling	4/56	0.2751	0.68263	1.5448	1.99375	BLK;GNA12;ARHGEF1;PRKCQ
BRCA1, BRCA2 and ATR roles in cancer susceptibility	2/22	0.281127	0.68263	2.00738	2.54727	RAD17;ATM
CTLA4 inhibitory signaling	2/22	0.281127	0.68263	2.00738	2.54727	PPP2R1A;CTLA4
Epstein-Barr virus LMP1 signaling	2/22	0.281127	0.68263	2.00738	2.54727	MAP3K3;NFKB1
RNA polymerase II promoter escape	2/22	0.281127	0.68263	2.00738	2.54727	ERCC3;TAF6
Smooth muscle contraction	2/22	0.281127	0.68263	2.00738	2.54727	PXN;SORBS3
T cell receptor downstream signaling	2/22	0.281127	0.68263	2.00738	2.54727	PRKCQ;NFKB1
G13 signaling pathway	3/39	0.282386	0.68263	1.67318	2.1157	LIMK1;PIP4K2A;ARHGEF1
HIV-1 transcription initiation	3/39	0.282386	0.68263	1.67318	2.1157	ERCC3;POLR2D;TAF6
Acute myeloid leukemia	4/57	0.285813	0.68263	1.51558	1.89813	PIK3R1;NFKB1;RUNX1;PPARD
PI3K cascade	4/57	0.285813	0.68263	1.51558	1.89813	GAB1;PIK3R1;FOXO3;FGFR1
SHP2 signaling	4/57	0.285813	0.68263	1.51558	1.89813	STAT1;GAB1;PIK3R1;PAG1
Cell surface interactions at the vascular wall	6/94	0.288584	0.68263	1.36956	1.70205	COL1A1;MMP1;CD47;ITGA5;PIK3R1;GAS6
Fc gamma receptor-mediated phagocytosis	6/94	0.288584	0.68263	1.36956	1.70205	LIMK1;ASAP1;PIK3R1;FCGR2B;WASF2;CRKL
Activation of PKC through G-protein coupled receptors	1/7	0.288733	0.68263	3.34457	4.1548	NFKB1
Creatine metabolism	1/7	0.288733	0.68263	3.34457	4.1548	GATM
Cyanoamino acid metabolism	1/7	0.288733	0.68263	3.34457	4.1548	GGT5
Gene expression regulation in late stage pancreatic bud precursor cells	1/7	0.288733	0.68263	3.34457	4.1548	RBPJ
Glucocorticoid biosynthesis	1/7	0.288733	0.68263	3.34457	4.1548	CYP11B1
Homologous DNA pairing and strand exchange	1/7	0.288733	0.68263	3.34457	4.1548	RAD52
Interleukin-1 processing	1/7	0.288733	0.68263	3.34457	4.1548	NFKB1
Mineralocorticoid biosynthesis	1/7	0.288733	0.68263	3.34457	4.1548	CYP11B1
Nef-mediated CD8 downregulation	1/7	0.288733	0.68263	3.34457	4.1548	AP2M1
PELP1 modulation of estrogen receptor activity	1/7	0.288733	0.68263	3.34457	4.1548	ESR1
PP2A-mediated dephosphorylation of key metabolic factors	1/7	0.288733	0.68263	3.34457	4.1548	PPP2R1A
Phase I of biological oxidations: non-cytochrome P450 enzymes	1/7	0.288733	0.68263	3.34457	4.1548	CES2
SARS coronavirus protease	1/7	0.288733	0.68263	3.34457	4.1548	ANPEP
Spermatogenesis regulation by CREM	1/7	0.288733	0.68263	3.34457	4.1548	ADCY1
Telomerase RNA component gene hTERC transcriptional regulation	1/7	0.288733	0.68263	3.34457	4.1548	SP1
Terminal pathway of complement	1/7	0.288733	0.68263	3.34457	4.1548	C7
Transport of inorganic cations/anions and amino acids/oligopeptides	6/95	0.296891	0.691992	1.3541	1.6444	SLC9A9;SLC1A2;SLC1A4;SLC1A5;SLC15A3;SLC38A4
Tight junction	8/133	0.297959	0.691992	1.28577	1.55682	VAPA;PPP2R1A;EPB41L1;EPB41L2;EPB41L3;EXOC4;CTNNB1;PRKCQ
BAD phosphorylation mediated by IGF1R signaling	2/23	0.299001	0.691992	1.91169	2.308	ADCY1;PIK3R1
CREB transcription factor and its extracellular signals	2/23	0.299001	0.691992	1.91169	2.308	ADCY1;PIK3R1
Eicosanoid metabolism	2/23	0.299001	0.691992	1.91169	2.308	PTGFR;PTGS1
Hypoxia and p53 in the cardiovascular system	2/23	0.299001	0.691992	1.91169	2.308	ATM;HIC1
Progesterone-initiated oocyte maturation	2/23	0.299001	0.691992	1.91169	2.308	PGR;ADCY1
Signaling by bone morphogenetic protein (BMP)	2/23	0.299001	0.691992	1.91169	2.308	SMAD6;SMAD7
Signaling events mediated by the hedgehog family	2/23	0.299001	0.691992	1.91169	2.308	PIK3R1;GLI2
Th1/Th2 differentiation pathway	2/23	0.299001	0.691992	1.91169	2.308	CD40;CD40LG
ATF2 transcription factor network	4/59	0.307406	0.702015	1.46031	1.72256	DUSP10;POU2F1;NF1;ESR1
Fatty acid, triacylglycerol, and ketone body metabolism	10/173	0.307757	0.702015	1.23267	1.45264	MED24;NCOR1;CHD9;SIN3A;NCOA3;TXNRD1;NR1D1;RGL1;LPIN2;MED6
Bioactive peptide-induced signaling pathway	3/41	0.308683	0.702015	1.58495	1.86302	STAT1;PIK3R1;MAPT
FOXM1 transcription factor network	3/41	0.308683	0.702015	1.58495	1.86302	SP1;ESR1;ETV5
Fc epsilon receptor I signaling in mast cells	3/41	0.308683	0.702015	1.58495	1.86302	PIK3R1;MS4A2;NFATC4
Graft-versus-host disease	3/41	0.308683	0.702015	1.58495	1.86302	KIR2DL1;HLA-DOA;HLA-DOB
Apoptosis regulation	5/78	0.312168	0.702015	1.37544	1.60131	DCC;PSMD13;PSMD2;PSME1;ATM
Mitochondrial pathway of apoptosis: BH3-only Bcl-2 family	6/97	0.313639	0.702015	1.3242	1.53543	CASP8;CTSH;PRKCQ;BMF;CD47;FOXO3
SREBP signaling	2/24	0.316801	0.702015	1.8247	2.09746	YY1;SP1
Tumor suppressor Arf inhibits ribosomal biogenesis	2/24	0.316801	0.702015	1.8247	2.09746	ATM;PIK3R1
Ephrin receptor B forward pathway	4/60	0.318265	0.702015	1.43416	1.64193	BLK;TIAM1;PXN;PIK3R1
Selenium pathway	4/60	0.318265	0.702015	1.43416	1.64193	ALOX15B;SOD3;NFKB1;PTGS1
Antigen processing: cross presentation	5/79	0.321597	0.702015	1.35679	1.53921	SEC61A1;PSMD13;PSMD2;PSME1;TAPBP
Aldosterone-regulated sodium reabsorption	3/42	0.321867	0.702015	1.54423	1.75056	FXYD2;ATP1A2;PIK3R1
Hexose transport	3/42	0.321867	0.702015	1.54423	1.75056	NUP50;NUP62;NUP43
Netrin-1 signaling	3/42	0.321867	0.702015	1.54423	1.75056	DCC;SLIT1;PRKCQ
TWEAK signaling pathway	3/42	0.321867	0.702015	1.54423	1.75056	CASP8;CTNNB1;NFKB1
Downstream signaling events Of B cell receptor (BCR)	6/98	0.322069	0.702015	1.30974	1.48392	PSMD13;PSMD2;PSME1;REL;FOXO3;NFKB1
Beta-oxidation of pristanoyl-CoA	1/8	0.32253	0.702015	2.86663	3.24375	ACOX3
Binding of RNA by insulin-like growth factor 2 mRNA binding proteins (IGF2BPs/IMPs/VICKZs)	1/8	0.32253	0.702015	2.86663	3.24375	CD44
Cytoskeletal remodeling regulation and cell spreading by IPP complex components	1/8	0.32253	0.702015	2.86663	3.24375	PXN
Fatty acid elongation in mitochondria	1/8	0.32253	0.702015	2.86663	3.24375	PPT1
Insulin secretion regulation by fatty acids bound to GPR40 (FFAR1)	1/8	0.32253	0.702015	2.86663	3.24375	FFAR1
Mechanism of acetaminophen activity and toxicity	1/8	0.32253	0.702015	2.86663	3.24375	PTGS1
NOD-like receptor (NLR) proteins	1/8	0.32253	0.702015	2.86663	3.24375	CD40
Nef-induced signal transduction	1/8	0.32253	0.702015	2.86663	3.24375	ELMO1
Organic cation transport	1/8	0.32253	0.702015	2.86663	3.24375	SLC22A18
Proepithelin conversion to epithelin and wound repair control	1/8	0.32253	0.702015	2.86663	3.24375	CELA2B
Recruitment of repair and signaling proteins to double-strand breaks	1/8	0.32253	0.702015	2.86663	3.24375	ATM
Vitamin D biosynthesis	1/8	0.32253	0.702015	2.86663	3.24375	GC
HIV genome transcription	4/61	0.329153	0.713599	1.40892	1.56564	RNGTT;ERCC3;POLR2D;TAF6
Ion channel transport	4/61	0.329153	0.713599	1.40892	1.56564	GABRR3;FXYD2;ATP10D;ATP1A2
Corticotropin releasing hormone pathway	2/25	0.334493	0.717879	1.74528	1.91132	CYP11B1;IVL
Glutathione conjugation	2/25	0.334493	0.717879	1.74528	1.91132	GGT5;GSTM5
RNA polymerase I transcription initiation	2/25	0.334493	0.717879	1.74528	1.91132	RRN3;ERCC3
TPO signaling pathway	2/25	0.334493	0.717879	1.74528	1.91132	STAT1;PIK3R1
Growth hormone receptor signaling	3/43	0.335054	0.717879	1.50554	1.64626	ADAM17;STAT1;PIK3R1
Voltage-gated potassium channels	3/43	0.335054	0.717879	1.50554	1.64626	KCNV1;KCNS1;KCNQ2
MAP kinase signaling pathway	5/81	0.340545	0.72195	1.32094	1.42293	MAP3K3;STAT1;SP1;NFKB1;MAPK13
G alpha s pathway	7/120	0.34425	0.72195	1.244	1.32658	MAP3K3;RGS1;ADCY1;PDE7A;PHKA2;RAPGEF4;MAPK13
Melanogenesis	6/101	0.347534	0.72195	1.26818	1.34032	WNT5B;WNT7B;CREB3L2;CTNNB1;PRKX;ADCY1
Heart development	3/44	0.348228	0.72195	1.46875	1.54938	CTNNB1;TBX5;NFATC4
Interactions of HIV Vpr protein with host cellular proteins	3/44	0.348228	0.72195	1.46875	1.54938	NUP50;NUP62;NUP43
NCAM1 interactions	3/44	0.348228	0.72195	1.46875	1.54938	COL1A1;COL6A1;GFRA2
O-linked glycosylation of mucins	4/63	0.350981	0.72195	1.36102	1.42502	GALNT11;ST6GAL1;GALNT13;ST3GAL4
Proteasome degradation	4/63	0.350981	0.72195	1.36102	1.42502	UBA7;PSMD13;PSMD2;PSME1
ALK1 pathway	2/26	0.352048	0.72195	1.67247	1.74604	SMAD7;TGFBR2
ERBB2 role in signal transduction and oncology	2/26	0.352048	0.72195	1.67247	1.74604	PIK3R1;ESR1
PGC-1a regulation	2/26	0.352048	0.72195	1.67247	1.74604	MEF2D;CAMKK2
Physiological and pathological hypertrophy of the heart	2/26	0.352048	0.72195	1.67247	1.74604	CTF1;NFATC4
RXR/VDR pathway	2/26	0.352048	0.72195	1.67247	1.74604	FAM120B;PPARD
Ras signaling pathway	2/26	0.352048	0.72195	1.67247	1.74604	PIK3R1;NFKB1
Termination of O-glycan biosynthesis	2/26	0.352048	0.72195	1.67247	1.74604	ST6GAL1;ST3GAL4
AKT phosphorylation of nuclear targets	1/9	0.354723	0.72195	2.50817	2.59951	FOXO3
Activation of pro-caspase 8	1/9	0.354723	0.72195	2.50817	2.59951	CASP8
Axonogenesis regulation by p75 neurotrophin receptor	1/9	0.354723	0.72195	2.50817	2.59951	ARHGEF1
Calcium/calmodulin-dependent protein kinase activation	1/9	0.354723	0.72195	2.50817	2.59951	CAMKK2
G2/M DNA damage checkpoint	1/9	0.354723	0.72195	2.50817	2.59951	ATM
Nef-mediated CD4 downregulation	1/9	0.354723	0.72195	2.50817	2.59951	AP2M1
Phenylalanine and tyrosine catabolism	1/9	0.354723	0.72195	2.50817	2.59951	PAH
Polyadenylation of mRNA	1/9	0.354723	0.72195	2.50817	2.59951	CPSF1
Prostanoid ligand receptors	1/9	0.354723	0.72195	2.50817	2.59951	PTGFR
Sodium/proton exchangers	1/9	0.354723	0.72195	2.50817	2.59951	SLC9A9
Tat-mediated elongation of the HIV-1 transcript	1/9	0.354723	0.72195	2.50817	2.59951	ERCC3
cAMP receptor, G-protein-independent pathways inferred from amoeba model	1/9	0.354723	0.72195	2.50817	2.59951	STAT1
Drug metabolism: cytochrome P450	5/83	0.35957	0.725789	1.28694	1.31634	CYP2C9;CYP2C8;CYP2B6;UGT2B28;GSTM5
Meiosis	5/83	0.35957	0.725789	1.28694	1.31634	UBE2I;STAG3;POT1;ATM;SYNE1
Signaling by PDGF	7/122	0.359839	0.725789	1.22223	1.24924	COL1A1;STAT1;COL6A1;PIK3R1;ADCY1;FOXO3;CRKL
RNA polymerase III transcription	3/45	0.361374	0.725789	1.4337	1.45928	POU2F1;NFIC;ADAR
Endothelins	4/64	0.361902	0.725789	1.33827	1.36019	MMP1;GNA12;PRKCQ;ADCY1
Interferon alpha/beta signaling	4/64	0.361902	0.725789	1.33827	1.36019	IRF3;STAT1;ADAR;IRF5
Ubiquitin-mediated degradation of phosphorylated Cdc25A	4/64	0.361902	0.725789	1.33827	1.36019	PSMD13;PSMD2;PSME1;ATM
Validated nuclear estrogen receptor alpha network	4/64	0.361902	0.725789	1.33827	1.36019	NCOR1;NCOA3;PGR;ESR1
Neuronal system	15/283	0.368769	0.726622	1.12431	1.1216	NSF;STX16;GLS2;RASGRF1;SLC1A2;ADCY1;GABRR3;PANX2;KCNV1;KCNS1;EPB41L1;DNAJC5;KCNQ2;AP2M1;GRIA4
BAD phosphorylation regulation	2/27	0.369438	0.726622	1.60549	1.5987	ADCY1;PIK3R1
Cell cycle: G2/M checkpoint	2/27	0.369438	0.726622	1.60549	1.5987	RASGRF1;ATM
EGFR downregulation	2/27	0.369438	0.726622	1.60549	1.5987	EPS15;AP2M1
ERK5 role in neuronal survival pathway	2/27	0.369438	0.726622	1.60549	1.5987	PIK3R1;MEF2D
Glycosphingolipid biosynthesis: lacto and neolacto series	2/27	0.369438	0.726622	1.60549	1.5987	ST8SIA1;ST3GAL4
Rev-mediated nuclear export of HIV-1 RNA	2/27	0.369438	0.726622	1.60549	1.5987	NUP50;NUP43
Retinol metabolism	4/65	0.372817	0.726622	1.31626	1.29871	CYP2C9;CYP2C8;CYP2B6;UGT2B28
MicroRNAs in cardiomyocyte hypertrophy	5/85	0.378625	0.726622	1.25463	1.21851	CTF1;CTNNB1;PIK3R1;NFKB1;NFATC4
TGF-beta regulation of skeletal system development	5/85	0.378625	0.726622	1.25463	1.21851	PPP2R1A;SP1;SMAD6;TGFBR2;SMAD7
Beta-1 integrin cell surface interactions	4/66	0.383716	0.726622	1.29496	1.24038	COL1A1;COL6A1;COL4A6;ITGA5
Destabilization of mRNA by AUF1 (hnRNP D0)	4/66	0.383716	0.726622	1.29496	1.24038	PSMD13;PSMD2;PSME1;HNRNPD
HIF-1 transcriptional activity in hypoxia	4/66	0.383716	0.726622	1.29496	1.24038	PKM;SP1;BHLHE41;NDRG1
Semaphorin interactions	4/66	0.383716	0.726622	1.29496	1.24038	NRP1;CD72;PLXND1;LIMK1
COPI-mediated vesicle transport	1/10	0.385387	0.726622	2.22936	2.12571	COPE
DCC role in regulating apoptosis	1/10	0.385387	0.726622	2.22936	2.12571	DCC
Deregulation of CDK5 in Alzheimer's disease	1/10	0.385387	0.726622	2.22936	2.12571	MAPT
Ethanol oxidation	1/10	0.385387	0.726622	2.22936	2.12571	ACSS1
Fanconi anemia pathway regulation	1/10	0.385387	0.726622	2.22936	2.12571	ATM
Free radical-induced apoptosis	1/10	0.385387	0.726622	2.22936	2.12571	NFKB1
Gap junction degradation	1/10	0.385387	0.726622	2.22936	2.12571	AP2M1
Glycoprotein 1b-IX-V activation signaling	1/10	0.385387	0.726622	2.22936	2.12571	PIK3R1
IKK complex recruitment mediated by RIP1	1/10	0.385387	0.726622	2.22936	2.12571	TICAM2
Interferon-alpha signaling pathway	1/10	0.385387	0.726622	2.22936	2.12571	STAT1
Netrin mediated repulsion signals	1/10	0.385387	0.726622	2.22936	2.12571	DCC
Phospholipase C signaling pathway	1/10	0.385387	0.726622	2.22936	2.12571	PIK3R1
Ran role in mitotic spindle regulation	1/10	0.385387	0.726622	2.22936	2.12571	NUMA1
Second messenger role in netrin-1 signaling	1/10	0.385387	0.726622	2.22936	2.12571	DCC
Signal-dependent regulation of myogenesis by corepressor MITR	1/10	0.385387	0.726622	2.22936	2.12571	MEF2D
TRAF6-mediated IRF7 activation in TLR7/8 or 9 signaling	1/10	0.385387	0.726622	2.22936	2.12571	TLR7
Taurine and hypotaurine metabolism	1/10	0.385387	0.726622	2.22936	2.12571	GGT5
Multi-step regulation of transcription by PITX2	2/28	0.38664	0.726622	1.54365	1.46687	APC;CTNNB1
Nef in HIV-1 replication and disease pathogenesis	2/28	0.38664	0.726622	1.54365	1.46687	ELMO1;AP2M1
TGF-beta receptor activation of SMADs	2/28	0.38664	0.726622	1.54365	1.46687	SMAD7;TGFBR2
ABC transporters	3/47	0.387529	0.726622	1.36839	1.29718	ABCC4;ABCA6;ABCA8
Agrin in postsynaptic differentiation	3/47	0.387529	0.726622	1.36839	1.29718	NRG3;SP1;PXN
Non-class A, B, C GPCRs	5/86	0.38815	0.726622	1.23908	1.17262	PTGFR;F2R;SPECC1L;CELSR1;OR10A5
Progesterone-mediated oocyte maturation	5/86	0.38815	0.726622	1.23908	1.17262	PGR;PRKX;ADCY1;PIK3R1;MAPK13
mRNA stability regulation by proteins that bind AU-rich elements	5/86	0.38815	0.726622	1.23908	1.17262	PSMD13;PSMD2;PSME1;HNRNPD;DCP1A
Adipocytokine signaling pathway	4/67	0.394593	0.732024	1.27434	1.18501	LEPR;PRKCQ;NFKB1;CAMKK2
ATM pathway	3/48	0.400512	0.732024	1.33791	1.2242	RAD17;ATM;NFKB1
Diurnally regulated genes with circadian orthologs	3/48	0.400512	0.732024	1.33791	1.2242	VAPA;NR1D2;HERPUD1
Energy metabolism	3/48	0.400512	0.732024	1.33791	1.2242	FOXO3;MEF2D;PPARD
ADP-ribosylation factor	2/29	0.403633	0.732024	1.4864	1.34854	ASAP1;ARHGAP4
Association of TriC/CCT with target proteins during biosynthesis	2/29	0.403633	0.732024	1.4864	1.34854	USP11;FBXO4
BARD1 signaling events	2/29	0.403633	0.732024	1.4864	1.34854	ATM;TOPBP1
Homologous recombination	2/29	0.403633	0.732024	1.4864	1.34854	RAD52;ATM
Influence of Ras and Rho proteins on G1 to S transition	2/29	0.403633	0.732024	1.4864	1.34854	PIK3R1;NFKB1
Sema4D in semaphorin signaling	2/29	0.403633	0.732024	1.4864	1.34854	CD72;LIMK1
Skeletal myogenesis control by HDAC and calcium/calmodulin-dependent kinase (CaMK)	2/29	0.403633	0.732024	1.4864	1.34854	PIK3R1;MEF2D
T cell receptor calcium pathway	2/29	0.403633	0.732024	1.4864	1.34854	POU2F1;CD40LG
Oncostatin M	16/311	0.407796	0.732024	1.0891	0.976911	STAT1;USP9X;MMP1;F2R;GAB1;AMPD3;ESR1;SYNE1;COL1A1;AKR1B10;CASP8;CTSH;PGR;PTPN7;IVL;PPARD
Ceramide signaling pathway	3/49	0.413417	0.732024	1.30876	1.15602	CASP8;NFKB1;BIRC3
Alternative complement pathway	1/11	0.414596	0.732024	2.00632	1.76647	C7
Apoptotic cleavage of cell adhesion proteins	1/11	0.414596	0.732024	2.00632	1.76647	CTNNB1
Bone mineralization regulation	1/11	0.414596	0.732024	2.00632	1.76647	COL4A6
Cardiac protection against reactive oxygen species	1/11	0.414596	0.732024	2.00632	1.76647	SOD3
Cystic fibrosis transmembrane conductance regulator (CFTR) and beta 2 adrenergic receptor (b2AR) pathway	1/11	0.414596	0.732024	2.00632	1.76647	ADCY1
Erythropoietin-mediated neuroprotection through NF-kB	1/11	0.414596	0.732024	2.00632	1.76647	NFKB1
Gamma-carboxylation, transport, and amino-terminal cleavage of proteins	1/11	0.414596	0.732024	2.00632	1.76647	GAS6
Glutathione biosynthesis and recycling	1/11	0.414596	0.732024	2.00632	1.76647	GGT5
Mechanism of protein import into the nucleus	1/11	0.414596	0.732024	2.00632	1.76647	NUP62
Monocyte and its surface molecules	1/11	0.414596	0.732024	2.00632	1.76647	CD44
Osteopontin signaling	1/11	0.414596	0.732024	2.00632	1.76647	NFKB1
Reversal of insulin resistance by leptin	1/11	0.414596	0.732024	2.00632	1.76647	LEPR
SUMOylation as a mechanism to modulate CtBP-dependent gene responses	1/11	0.414596	0.732024	2.00632	1.76647	UBE2I
Signaling by activated point mutants of FGFR1	1/11	0.414596	0.732024	2.00632	1.76647	FGFR1
TGF-beta signaling in gastrointestinal stem cells	1/11	0.414596	0.732024	2.00632	1.76647	TGFBR2
Vitamin C in the brain	1/11	0.414596	0.732024	2.00632	1.76647	COL4A6
eIF2 regulation	1/11	0.414596	0.732024	2.00632	1.76647	EIF2AK1
Transmission across chemical synapses	10/190	0.415924	0.732024	1.11525	0.978355	NSF;GABRR3;EPB41L1;GLS2;DNAJC5;RASGRF1;SLC1A2;ADCY1;AP2M1;GRIA4
Signaling by interleukins	6/109	0.415946	0.732024	1.16918	1.02561	MAP3K3;STAT1;PIK3R1;IL7R;NFKB1;CRKL
PPAR signaling pathway	4/69	0.416247	0.732024	1.235	1.08244	MMP1;SLC27A6;ACOX3;PPARD
Prostate cancer	5/89	0.416646	0.732024	1.19463	1.04592	CREB3L2;CTNNB1;PIK3R1;NFKB1;FGFR1
Salivary secretion	5/89	0.416646	0.732024	1.19463	1.04592	FXYD2;ATP1A2;PRKX;AQP5;ADCY1
Apoptosis intrinsic pathway	2/30	0.420397	0.732024	1.43324	1.24199	CASP8;BMF
CDC42 activity regulation	2/30	0.420397	0.732024	1.43324	1.24199	DOCK10;APC
Interleukin-2/STAT5 pathway	2/30	0.420397	0.732024	1.43324	1.24199	SP1;PIK3R1
MicroRNAs in muscle cell differentiation	2/30	0.420397	0.732024	1.43324	1.24199	PRKCQ;MEF2D
Nectin adhesion pathway	2/30	0.420397	0.732024	1.43324	1.24199	CTNNB1;PIK3R1
O-glycan biosynthesis	2/30	0.420397	0.732024	1.43324	1.24199	GALNT11;GALNT13
PDGFA signaling pathway	2/30	0.420397	0.732024	1.43324	1.24199	STAT1;PIK3R1
Signaling pathway from G-protein families	2/30	0.420397	0.732024	1.43324	1.24199	ADCY1;NFATC4
Aquaporin-mediated transport	3/50	0.426232	0.73537	1.28084	1.09227	AQP5;ADCY1;AQP2
Non-coding RNA metabolism	3/50	0.426232	0.73537	1.28084	1.09227	NUP50;NUP62;NUP43
AP-1 transcription factor network	4/70	0.427011	0.73537	1.21622	1.03494	MMP1;SP1;CTNNB1;ESR1
G alpha q pathway	4/70	0.427011	0.73537	1.21622	1.03494	RGS1;PRKCQ;PHKA2;NFKB1
NCAM signaling for neurite out-growth	4/70	0.427011	0.73537	1.21622	1.03494	COL1A1;COL6A1;GFRA2;FGFR1
Nucleotide metabolism	4/70	0.427011	0.73537	1.21622	1.03494	RRM2B;TXNRD1;AMPD1;AMPD3
Pancreatic cancer	4/70	0.427011	0.73537	1.21622	1.03494	STAT1;PIK3R1;NFKB1;TGFBR2
EGFR1 pathway	8/152	0.434904	0.745406	1.115	0.928385	PIK3IP1;MMP1;TXNIP;CTSH;MAPT;PDE7A;ESR1;ZFP36L2
Alpha-6 beta-4 integrin signaling pathway	2/31	0.436915	0.745406	1.38375	1.14576	GAB1;PIK3R1
NF-kappaB activation by non-typeable Hemophilus influenzae	2/31	0.436915	0.745406	1.38375	1.14576	NFKB1;TGFBR2
Prostaglandin biosynthesis and regulation	2/31	0.436915	0.745406	1.38375	1.14576	PTGFR;PTGS1
Ras family activation regulation	2/31	0.436915	0.745406	1.38375	1.14576	RASGRF1;NF1
Transport of vitamins, nucleosides, and related molecules	2/31	0.436915	0.745406	1.38375	1.14576	SLC33A1;SLC27A6
BMP signaling and regulation	1/12	0.442418	0.745518	1.82383	1.48734	SMAD6
ERK inactivation	1/12	0.442418	0.745518	1.82383	1.48734	PPP2R1A
Gamma-aminobutyric acid receptor life cycle	1/12	0.442418	0.745518	1.82383	1.48734	NSF
Phosphatidylethanolamine biosynthesis	1/12	0.442418	0.745518	1.82383	1.48734	LPIN2
Phospholipase C epsilon pathway	1/12	0.442418	0.745518	1.82383	1.48734	ADCY1
Rab GTPases mark targets in the endocytotic machinery	1/12	0.442418	0.745518	1.82383	1.48734	RAB7A
Resolution of AP sites via the single-nucleotide replacement pathway	1/12	0.442418	0.745518	1.82383	1.48734	MBD4
SRF and microRNAs in smooth muscle differentiation and proliferation	1/12	0.442418	0.745518	1.82383	1.48734	MEF2D
Insulin signaling pathway	14/277	0.444753	0.748251	1.06845	0.865695	MAP3K3;EXOC7;GAB1;PRKX;PIK3R1;RHOF;FOXO3;PHKA2;CRKL;MAPK13;DOK1;TBC1D4;EXOC4;PRKCQ
Metapathway biotransformation	9/174	0.445404	0.748251	1.09468	0.885346	CYP2C9;CYP2C8;CYP2B6;AKR1B10;CYP2U1;CHST11;CYP11B1;UGT2B28;GSTM5
Interleukin-2 receptor beta chain in T cell activation	3/52	0.451554	0.75552	1.22843	0.976679	PIK3R1;CFLAR;CRKL
Hypothetical network for drug addiction	2/32	0.453174	0.75552	1.33755	1.05864	ADCY1;GRIA4
Pancreatic beta-cell development regulation	2/32	0.453174	0.75552	1.33755	1.05864	PAX6;RBPJ
Sphingolipid de novo biosynthesis	2/32	0.453174	0.75552	1.33755	1.05864	SGMS1;VAPA
Syndecan 4 pathway	2/32	0.453174	0.75552	1.33755	1.05864	ITGA5;FGFR1
Adenylate cyclase inhibitory pathway	1/13	0.468919	0.761866	1.67176	1.26607	ADCY1
Advanced glycosylation endproduct receptor signaling	1/13	0.468919	0.761866	1.67176	1.26607	PRKCSH
Angiotensin-converting enzyme 2 regulation of heart function	1/13	0.468919	0.761866	1.67176	1.26607	COL4A6
CBL-mediated ligand-induced downregulation of EGF receptors	1/13	0.468919	0.761866	1.67176	1.26607	CSF1R
Double stranded RNA-induced gene expression	1/13	0.468919	0.761866	1.67176	1.26607	NFKB1
Ghrelin-mediated regulation of food intake and energy homeostasis	1/13	0.468919	0.761866	1.67176	1.26607	IGFBP5
HIV life cycle early phase	1/13	0.468919	0.761866	1.67176	1.26607	LIG1
Organic cation/anion/zwitterion transport	1/13	0.468919	0.761866	1.67176	1.26607	SLC22A18
Platelet adhesion to exposed collagen	1/13	0.468919	0.761866	1.67176	1.26607	COL1A1
Signal attenuation	1/13	0.468919	0.761866	1.67176	1.26607	DOK1
Signal regulatory protein (SIRP) family interactions	1/13	0.468919	0.761866	1.67176	1.26607	CD47
Sulfur metabolism	1/13	0.468919	0.761866	1.67176	1.26607	CHST11
E2F-mediated regulation of DNA replication	2/33	0.469161	0.761866	1.29434	0.979566	PPP2R1A;PPP2R3B
Fluoropyrimidine activity	2/33	0.469161	0.761866	1.29434	0.979566	ABCC4;CES2
Glycoprotein VI-mediated activation cascade	2/33	0.469161	0.761866	1.29434	0.979566	COL1A1;PIK3R1
Syndecan 2 pathway	2/33	0.469161	0.761866	1.29434	0.979566	NF1;ITGA5
Seven transmembrane receptor signaling through beta-arrestin	4/74	0.469482	0.761866	1.14648	0.866884	MAP3K3;PDE7A;NFKB1;MAPK13
Wnt/calcium/cyclic GMP pathway	4/74	0.469482	0.761866	1.14648	0.866884	WNT5B;WNT7B;PRKCQ;NFATC4
Arginine and proline metabolism	3/54	0.476404	0.769683	1.18014	0.875058	ALDH4A1;GATM;GLS2
Binding of chemokines to chemokine receptors	3/54	0.476404	0.769683	1.18014	0.875058	CCL22;CCR6;CXCL16
Non-small cell lung cancer	3/54	0.476404	0.769683	1.18014	0.875058	PIK3R1;FOXO3;FHIT
Prolactin activation of MAPK signaling	4/75	0.479924	0.772216	1.13027	0.829765	STAT1;PXN;PIK3R1;NFKB1
M phase pathway	5/96	0.482046	0.772216	1.10233	0.804388	PPP2R1A;NDE1;NUP43;BUB3;CKAP5
Cell cycle checkpoints	6/117	0.483478	0.772216	1.08446	0.78813	PSMD13;PSMD2;PSME1;RAD17;ATM;BUB3
Cysteine and methionine metabolism	2/34	0.484865	0.772216	1.25382	0.907625	IL4I1;MTAP
Ephrin receptor A forward pathway	2/34	0.484865	0.772216	1.25382	0.907625	BLK;CRKL
HIF-2-alpha transcription factor network	2/34	0.484865	0.772216	1.25382	0.907625	SP1;HIF1AN
VEGF signaling pathway	4/76	0.490285	0.772216	1.11452	0.794393	PXN;PIK3R1;MAPK13;NFATC4
Adhesion and diapedesis of lymphocytes	1/14	0.494162	0.772216	1.54308	1.08771	CD34
CARM1 transcriptional regulation by protein methylation	1/14	0.494162	0.772216	1.54308	1.08771	NCOA3
DCC-mediated attractive signaling	1/14	0.494162	0.772216	1.54308	1.08771	DCC
Glycogen breakdown (glycogenolysis)	1/14	0.494162	0.772216	1.54308	1.08771	PHKA2
Glycosphingolipid biosynthesis: globo series	1/14	0.494162	0.772216	1.54308	1.08771	ST8SIA1
HIV-1 early elongation complex formation	1/14	0.494162	0.772216	1.54308	1.08771	ERCC3
Hyaluronan metabolism	1/14	0.494162	0.772216	1.54308	1.08771	CD44
Non-homologous end-joining (NHEJ) pathway	1/14	0.494162	0.772216	1.54308	1.08771	POLM
Platelet amyloid precursor protein pathway	1/14	0.494162	0.772216	1.54308	1.08771	COL4A6
Polyamine metabolism	1/14	0.494162	0.772216	1.54308	1.08771	MTAP
Retrograde neurotrophin signaling	1/14	0.494162	0.772216	1.54308	1.08771	AP2M1
S1P/S1P4 pathway	1/14	0.494162	0.772216	1.54308	1.08771	GNA12
Sema3A-plexin repulsion signaling by inhibiting integrin adhesion	1/14	0.494162	0.772216	1.54308	1.08771	NRP1
T cell receptor/Ras pathway	1/14	0.494162	0.772216	1.54308	1.08771	PTPN7
TRAF3-dependent IRF activation pathway	1/14	0.494162	0.772216	1.54308	1.08771	IRF3
Viral messenger RNA biosynthesis	1/14	0.494162	0.772216	1.54308	1.08771	POLR2D
PIK3C1/AKT pathway	2/35	0.500276	0.777781	1.21577	0.842034	TBC1D4;FOXO3
Prion diseases	2/35	0.500276	0.777781	1.21577	0.842034	C7;PRKX
fMLP induced chemokine gene expression in HMC-1 cells	2/35	0.500276	0.777781	1.21577	0.842034	NFKB1;NFATC4
Complement cascade	4/77	0.500559	0.777781	1.09919	0.760673	IGLV1-51;C7;IGKV1-5;MASP1
Granule cell survival pathway	5/99	0.509322	0.784099	1.06698	0.719866	KCNV1;MAP3K3;PARP1;MAPT;ADCY1
Phosphatidylinositol signaling system	4/78	0.510742	0.784099	1.08428	0.728517	INPP5E;PIP4K2A;PIP4K2B;PIK3R1
Inositol phosphate metabolism	3/57	0.512657	0.784099	1.1144	0.744582	INPP5E;PIP4K2A;PIP4K2B
Mechanism of gene regulation by peroxisome proliferators via PPAR-alpha	3/57	0.512657	0.784099	1.1144	0.744582	NCOR1;SP1;PIK3R1
GM-CSF-mediated signaling events	2/36	0.515387	0.784099	1.17995	0.782112	STAT1;PIK3R1
Neurotransmitter release cycle	2/36	0.515387	0.784099	1.17995	0.782112	GLS2;DNAJC5
Phospholipids as signaling intermediaries	2/36	0.515387	0.784099	1.17995	0.782112	ADCY1;PIK3R1
Arf6 vesicle-mediated transport	1/15	0.518206	0.784099	1.43279	0.941889	TIAM1
BMP signaling pathway in stem cells	1/15	0.518206	0.784099	1.43279	0.941889	MSX1
Biogenic amine biosynthesis	1/15	0.518206	0.784099	1.43279	0.941889	PAH
Coagulation intrinsic pathway	1/15	0.518206	0.784099	1.43279	0.941889	PRCP
Cytochrome P450 metabolism of endogenous sterols	1/15	0.518206	0.784099	1.43279	0.941889	CYP11B1
Eicosanoid ligand-binding G-protein coupled receptors	1/15	0.518206	0.784099	1.43279	0.941889	PTGFR
Interleukin-17 signaling pathway	1/15	0.518206	0.784099	1.43279	0.941889	CD34
Lagging strand processive biosynthesis	1/15	0.518206	0.784099	1.43279	0.941889	LIG1
Messenger RNA decay by 5' to 3' exoribonuclease	1/15	0.518206	0.784099	1.43279	0.941889	DCP1A
Mu-calpain pathway	1/15	0.518206	0.784099	1.43279	0.941889	PXN
TRAF6-mediated induction of TAK1 complex	1/15	0.518206	0.784099	1.43279	0.941889	TICAM2
TrkA receptor signaling pathway	1/15	0.518206	0.784099	1.43279	0.941889	PIK3R1
Purine metabolism	8/164	0.520561	0.786578	1.02858	0.671507	PKM;RRM2B;POLR2D;AMPD1;AMPD3;ADCY1;PDE7A;FHIT
Autodegradation of Cdh1 by Cdh1-APC/C	3/58	0.524443	0.790407	1.09408	0.706138	PSMD13;PSMD2;PSME1
Pancreatic secretion	5/101	0.527178	0.790407	1.04464	0.668798	PNLIPRP1;CELA2B;FXYD2;ATP1A2;ADCY1
PI3K/AKT activation	2/37	0.530192	0.790407	1.14617	0.727265	PIK3R1;FOXO3
Signaling by ERBB2	5/102	0.535999	0.790407	1.03382	0.644714	NRG3;GAB1;PIK3R1;ADCY1;FOXO3
Acetylation and deacetylation of RelA in the nucleus	1/16	0.541108	0.790407	1.3372	0.821221	NFKB1
Amino acid biosynthesis and interconversion (transamination)	1/16	0.541108	0.790407	1.3372	0.821221	GLS2
B cell survival pathway	1/16	0.541108	0.790407	1.3372	0.821221	PIK3R1
CRMPs in Sema3A signaling	1/16	0.541108	0.790407	1.3372	0.821221	NRP1
Cell-extracellular matrix interactions	1/16	0.541108	0.790407	1.3372	0.821221	PXN
Control of cell cycle and breast tumor growth by estrogen-responsive protein Efp	1/16	0.541108	0.790407	1.3372	0.821221	ESR1
DNA-PK pathway in nonhomologous end joining	1/16	0.541108	0.790407	1.3372	0.821221	POLM
Gap-filling DNA repair biosynthesis and ligation in global genomic nucleotide excision repair	1/16	0.541108	0.790407	1.3372	0.821221	LIG1
Glutamate neurotransmitter release cycle	1/16	0.541108	0.790407	1.3372	0.821221	GLS2
LPA4-mediated signaling events	1/16	0.541108	0.790407	1.3372	0.821221	ADCY1
N-glycan precursor substrate biosynthesis	1/16	0.541108	0.790407	1.3372	0.821221	PMM2
Other semaphorin interactions	1/16	0.541108	0.790407	1.3372	0.821221	PLXND1
PI3K subunit p85 role in regulation of actin organization and cell migration	1/16	0.541108	0.790407	1.3372	0.821221	PIK3R1
Rap1 signaling	1/16	0.541108	0.790407	1.3372	0.821221	RAPGEF4
Riboflavin metabolism	1/16	0.541108	0.790407	1.3372	0.821221	MTMR2
Selenium metabolism and selenoproteins	1/16	0.541108	0.790407	1.3372	0.821221	NFKB1
Serotonin receptor 2 and ELK-SRF/GATA4 signaling	1/16	0.541108	0.790407	1.3372	0.821221	RASGRF1
Sonic Hedgehog (Shh) pathway	1/16	0.541108	0.790407	1.3372	0.821221	GLI2
Sprouty regulation of FGF signaling	1/16	0.541108	0.790407	1.3372	0.821221	PPP2R1A
TGF-beta receptor signaling in EMT (epithelial to mesenchymal transition)	1/16	0.541108	0.790407	1.3372	0.821221	TGFBR2
p75 neurotrophin receptor signaling via NF-kB	1/16	0.541108	0.790407	1.3372	0.821221	NFKB1
Cyclin D-associated events in G1	2/38	0.544685	0.79255	1.11428	0.676975	PPP2R1A;PPP2R3B
Trefoil factor initiation of mucosal healing	2/38	0.544685	0.79255	1.11428	0.676975	CTNNB1;PIK3R1
Chromosome maintenance	5/103	0.544743	0.79255	1.02322	0.621544	UBE2I;LIG1;STAG3;POT1;SYNE1
RAGE pathway	3/60	0.547533	0.795555	1.05558	0.635808	MMP1;TNFSF11;ITGA5
Integration of energy metabolism	6/125	0.548403	0.795765	1.01113	0.607429	PPP2R1A;CTNNB1;PAX6;FFAR1;ADCY1;RAPGEF4
APC/C-mediated degradation of cell cycle proteins	4/82	0.550479	0.796808	1.02846	0.613955	PSMD13;PSMD2;PSME1;BUB3
Focal adhesion	11/233	0.551962	0.796808	0.993524	0.590427	COL1A1;BLK;PXN;RASGRF1;COL6A1;COL4A6;CTNNB1;PIK3R1;ITGA5;CRKL;BIRC3
Clathrin derived vesicle budding	3/61	0.558829	0.796808	1.03732	0.603631	TPD52;TGOLN2;DNAJC6
Glucose metabolism	3/61	0.558829	0.796808	1.03732	0.603631	PPP2R1A;SLC25A12;PHKA2
Licensing factor removal from origins	3/61	0.558829	0.796808	1.03732	0.603631	PSMD13;PSMD2;PSME1
Angiotensin II-mediated activation of JNK pathway via Pyk2-dependent signaling	2/39	0.558864	0.796808	1.0841	0.630785	MEF2D;CRKL
Aurora B signaling	2/39	0.558864	0.796808	1.0841	0.630785	KLHL9;TACC1
Fibroblast growth factor receptor pathway	5/105	0.561992	0.796808	1.00265	0.577792	GAB1;PRKCQ;PIK3R1;FGFR1;MAPK13
ABCA transporters in lipid homeostasis	1/17	0.562923	0.796808	1.25356	0.720309	ABCA6
Activation of BH3-only proteins	1/17	0.562923	0.796808	1.25356	0.720309	BMF
Beta-arrestin-dependent recruitment of Src kinases in GPCR signaling	1/17	0.562923	0.796808	1.25356	0.720309	ADCY1
Branched-chain amino acid catabolism	1/17	0.562923	0.796808	1.25356	0.720309	IVD
Cadmium-induced DNA biosynthesis and proliferation in macrophages	1/17	0.562923	0.796808	1.25356	0.720309	NFKB1
Cells and molecules involved in local acute inflammatory response	1/17	0.562923	0.796808	1.25356	0.720309	C7
Energy-dependent regulation of mTOR by LKB1-AMPK	1/17	0.562923	0.796808	1.25356	0.720309	CAB39L
HIV-1 elongation complex formation in the absence of HIV-1 Tat	1/17	0.562923	0.796808	1.25356	0.720309	ERCC3
Platelet sensitization by LDL	1/17	0.562923	0.796808	1.25356	0.720309	PPP2R1A
Renin-angiotensin system	1/17	0.562923	0.796808	1.25356	0.720309	ANPEP
Unblocking of NMDA receptor, glutamate binding and activation	1/17	0.562923	0.796808	1.25356	0.720309	GRIA4
Negative regulation of FGFR signaling	2/40	0.572724	0.808595	1.05552	0.588294	PPP2R1A;FGFR1
PAC1 receptor pathway	2/40	0.572724	0.808595	1.05552	0.588294	PRKCQ;ADCY1
Cell cycle	21/453	0.577837	0.81231	0.974211	0.534319	CEP57;UBE2I;LIN37;NUMA1;LIG1;PSMD13;NDE1;PPP2R3B;CKAP5;SYNE1;STAG3;PPP2R1A;PSMD2;CNTRL;PSME1;RAD17;POT1;TUBGCP6;ATM;NUP43;BUB3
Cell-cell communication	6/129	0.579459	0.81231	0.978038	0.533676	DCC;PXN;CTNNB1;PIK3R1;CD47;MAPK13
Amino acid metabolism	9/195	0.583106	0.81231	0.970004	0.523208	ALDH4A1;MTAP;GATM;PSMD13;GLS2;PSMD2;PAH;IVD;PSME1
Activated AMPK stimulation of fatty-acid oxidation in muscle	1/18	0.583702	0.81231	1.17976	0.63514	CAB39L
Botulinum neurotoxicity	1/18	0.583702	0.81231	1.17976	0.63514	STX16
Downregulation of MTA-3 in ER-negative breast tumors	1/18	0.583702	0.81231	1.17976	0.63514	ESR1
PKA activation in glucagon signaling	1/18	0.583702	0.81231	1.17976	0.63514	ADCY1
Phosphatidylcholine biosynthesis	1/18	0.583702	0.81231	1.17976	0.63514	LPIN2
TNFR2 signaling pathway	1/18	0.583702	0.81231	1.17976	0.63514	NFKB1
Tie2 signaling	1/18	0.583702	0.81231	1.17976	0.63514	PIK3R1
Alpha-M beta-2 integrin signaling	2/41	0.586265	0.81231	1.0284	0.549149	BLK;NFKB1
ERBB1 internalization pathway	2/41	0.586265	0.81231	1.0284	0.549149	PIK3R1;EPS15
Insulin biosynthesis and processing	2/41	0.586265	0.81231	1.0284	0.549149	EXOC7;EXOC4
Plasma membrane estrogen receptor signaling	2/41	0.586265	0.81231	1.0284	0.549149	PIK3R1;ESR1
G alpha i pathway	5/108	0.587232	0.81231	0.973288	0.518116	MAP3K3;RGS1;PRKCQ;ADCY1;MAPK13
Post-translational protein modification	9/196	0.589295	0.81231	0.964766	0.510196	GALNT11;ST6GAL1;GALNT13;PRKCSH;EDEM1;MGAT4A;PMM2;ST3GAL4;GAS6
Angiotensin II-stimulated signaling through G-proteins and beta-arrestin	3/64	0.591671	0.81231	0.986151	0.517536	MAP3K3;PRKCQ;MAPK13
Collagen biosynthesis and modifying enzymes	3/64	0.591671	0.81231	0.986151	0.517536	COL1A1;COL6A1;COL4A6
Signaling by insulin receptor	5/109	0.595467	0.81231	0.963879	0.499684	DOK1;CAB39L;GAB1;PIK3R1;FGFR1
BMP receptor signaling	2/42	0.599485	0.81231	1.00264	0.513034	SMAD6;SMAD7
Eukaryotic transcription initiation	2/42	0.599485	0.81231	1.00264	0.513034	ERCC3;TAF6
VEGF, hypoxia, and angiogenesis	2/42	0.599485	0.81231	1.00264	0.513034	PXN;PIK3R1
Phagosome	7/154	0.60135	0.81231	0.954552	0.485464	SEC61A1;ITGA5;HLA-DOA;PLA2R1;FCGR2B;HLA-DOB;RAB7A
Interleukin-12-mediated signaling events	3/65	0.602261	0.81231	0.970195	0.491951	STAT1;NFKB1;RAB7A
Alpha-linolenic acid metabolism	1/19	0.603494	0.81231	1.11416	0.562671	ACOX3
Class C GPCRs (metabotropic glutamate and pheromone receptors)	1/19	0.603494	0.81231	1.11416	0.562671	GRM7
Destabilization of mRNA by butyrate response factor 1 (BRF1)	1/19	0.603494	0.81231	1.11416	0.562671	DCP1A
G-protein-independent seven transmembrane receptor signaling	1/19	0.603494	0.81231	1.11416	0.562671	MAPK13
GABA biosynthesis, release, reuptake and degradation	1/19	0.603494	0.81231	1.11416	0.562671	DNAJC5
Glycosaminoglycan degradation	1/19	0.603494	0.81231	1.11416	0.562671	SGSH
Inhibition of T cell receptor signaling by activated Csk	1/19	0.603494	0.81231	1.11416	0.562671	ADCY1
Lissencephaly gene (LIS1) in neuronal migration and development	1/19	0.603494	0.81231	1.11416	0.562671	DCX
MAL role in Rho-mediated activation of SRF	1/19	0.603494	0.81231	1.11416	0.562671	LIMK1
Ras activation upon calcium influx through NMDA receptor	1/19	0.603494	0.81231	1.11416	0.562671	RASGRF1
Signaling by NODAL	1/19	0.603494	0.81231	1.11416	0.562671	FOXO3
Small ligand GPCRs	1/19	0.603494	0.81231	1.11416	0.562671	PTGFR
TP53 network	1/19	0.603494	0.81231	1.11416	0.562671	ATM
Tob role in T-cell activation	1/19	0.603494	0.81231	1.11416	0.562671	TGFBR2
Integrin signaling pathway	7/155	0.608196	0.815652	0.948053	0.471427	MAP3K3;PXN;ASAP1;RHOF;ARHGAP26;CRKL;MAPK13
Myometrial relaxation and contraction pathways	7/155	0.608196	0.815652	0.948053	0.471427	RYR1;IGFBP5;RGS1;SP1;PRKCQ;ADCY1;NFKB1
Epidermal growth factor receptor (EGFR) pathway	5/111	0.611657	0.815652	0.945592	0.464837	GAB1;PRKCQ;PIK3R1;RHOF;MAPK13
G2/M checkpoints	2/43	0.612384	0.815652	0.978131	0.479672	RAD17;ATM
Mitotic prometaphase	2/43	0.612384	0.815652	0.978131	0.479672	NDE1;CKAP5
Type 1 diabetes mellitus	2/43	0.612384	0.815652	0.978131	0.479672	HLA-DOA;HLA-DOB
Endochondral ossification	3/66	0.612668	0.815652	0.954744	0.46776	CHST11;STAT1;FGFR1
Retinoblastoma protein regulation	3/66	0.612668	0.815652	0.954744	0.46776	BRD2;PPP2R3B;SMARCA4
Thyroid-stimulating hormone signaling pathway	3/66	0.612668	0.815652	0.954744	0.46776	STAT1;GNA12;PIK3R1
4-1BB-dependent immune response	1/20	0.622345	0.817144	1.05546	0.500562	NFKB1
Cell differentiation pathway	1/20	0.622345	0.817144	1.05546	0.500562	MEF2D
Chondroitin sulfate biosynthesis	1/20	0.622345	0.817144	1.05546	0.500562	CHST11
GATA3-mediated activation of Th2 cytokine expression	1/20	0.622345	0.817144	1.05546	0.500562	ADCY1
Gene expression regulation in pancreatic beta cells	1/20	0.622345	0.817144	1.05546	0.500562	PAX6
Golgi-associated vesicle biogenesis	1/20	0.622345	0.817144	1.05546	0.500562	DNAJC6
Heparan sulfate/heparin glycosaminoglycan (HS-GAG) degradation	1/20	0.622345	0.817144	1.05546	0.500562	SGSH
Interleukin-3 regulation of hematopoietic cells	1/20	0.622345	0.817144	1.05546	0.500562	FCER2
Nerve growth factor (NGF) pathway	1/20	0.622345	0.817144	1.05546	0.500562	PIK3R1
Skeletal muscle hypertrophy is regulated via AKT/mTOR pathway	1/20	0.622345	0.817144	1.05546	0.500562	PIK3R1
Urea cycle and metabolism of amino groups	1/20	0.622345	0.817144	1.05546	0.500562	GATM
T cell receptor signaling in naive CD4+ T cells	3/67	0.62289	0.817144	0.939777	0.444876	DBNL;PRKCQ;PAG1
Mitotic G1-G1/S phases	6/135	0.623923	0.817144	0.932253	0.43977	LIN37;PPP2R1A;PSMD13;PSMD2;PSME1;PPP2R3B
ERBB2/ERBB3 signaling events	2/44	0.624963	0.817144	0.954792	0.448813	PIK3R1;NFATC4
Valine, leucine and isoleucine degradation	2/44	0.624963	0.817144	0.954792	0.448813	IL4I1;IVD
Oocyte meiosis	5/113	0.627465	0.818465	0.927984	0.432503	STAG3;PPP2R1A;PGR;PRKX;ADCY1
mTOR signaling pathway	5/113	0.627465	0.818465	0.927984	0.432503	YY1;RRN3;CAB39L;PXN;PIK3R1
NGF signaling via TRKA from the plasma membrane	6/136	0.631066	0.819616	0.925033	0.425834	PPP2R1A;PIK3R1;ADCY1;FOXO3;AP2M1;MAPK13
AMPK signaling	3/68	0.632927	0.819616	0.92527	0.423219	LEPR;PIK3R1;CAMKK2
Epithelial cell signaling in Helicobacter pylori infection	3/68	0.632927	0.819616	0.92527	0.423219	ADAM17;NFKB1;MAPK13
G alpha (z) signaling events	2/45	0.637222	0.819616	0.932539	0.420236	PRKCQ;ADCY1
HNF3B pathway	2/45	0.637222	0.819616	0.932539	0.420236	SP1;NF1
Interleukin-3 signaling pathway	2/45	0.637222	0.819616	0.932539	0.420236	PIK3R1;CRKL
Interleukin-3, interleukin-5, and GM-CSF signaling	2/45	0.637222	0.819616	0.932539	0.420236	PIK3R1;CRKL
Adrenergic pathway	6/137	0.638129	0.819616	0.917923	0.412344	RGS1;PRKCQ;ADCY1;PDE7A;PHKA2;MAPK13
Biosynthesis of unsaturated fatty acids	1/21	0.640302	0.819616	1.00263	0.44699	ACOX3
CD28-dependent PI3K/Akt signaling	1/21	0.640302	0.819616	1.00263	0.44699	PIK3R1
ChREBP regulation by carbohydrates and cAMP	1/21	0.640302	0.819616	1.00263	0.44699	ADCY1
IGF1 signaling pathway	1/21	0.640302	0.819616	1.00263	0.44699	PIK3R1
Inactivation of APC/C via direct inhibition of the APC/C complex	1/21	0.640302	0.819616	1.00263	0.44699	BUB3
Oxidative stress-induced gene expression via Nrf2	1/21	0.640302	0.819616	1.00263	0.44699	FXYD2
Y branching of actin filaments	1/21	0.640302	0.819616	1.00263	0.44699	WASF2
p38 MK2 pathway	1/21	0.640302	0.819616	1.00263	0.44699	ETV1
Platelet activation, signaling and aggregation	9/205	0.642935	0.822028	0.920026	0.406386	COL1A1;ABCC4;F2R;GNA12;P2RY1;PRKCQ;PIK3R1;GAS6;RAPGEF4
[truncated: 239 more rows]

## Sheet: KEGG
Term	Overlap	P-value	Adjusted p-value	Odds Ratio	Combined Score	Genes
[truncated: 293 more rows]

## Sheet: GO Biolocical Processes
Term	Overlap	P-value	Adjusted p-value	Odds Ratio	Combined Score	Genes
[truncated: 3,323 more rows]

[truncated: 2 more sheets: GO Cellular Compartments, GO Molecular Function]
