# Supplementary material for: Transcriptome of Subcutaneous Adipose Tissue reflect Membrane Dysfunction and Impaired Oxidative Processes in T2D across Heterogenous Populations
Source: Research Square preprint supplement (doi:10.21203/rs.3.rs-7053974/v1), 2025-11-14
Supplement: Supplementary file 3 [file 4c4181b821f8adab5d27e694.docx]

## Legends of supplementary tables

**Table S1a**. Cohorts 1 and 2. Genes negatively associated with T2D in GEM-PLS with Enrichment analyses.

**Table S1b**. Cohorts 1 and 2. Genes positively associated with T2D in GEM-PLS.

**Table S2a**. Cohort 3. Genes negatively associated with T2D in GEM-PLS.

**Table S2b**. Cohort 3. Genes positively associated with T2D in GEM-PLS.

**Table S3a**. Cohorts 1, 2 and 3. Genes negatively associated with T2D in GEM-PLS of cohort 1 and 2, and in PLS of cohort 3.

**Table S3b**. Cohorts 1, 2 and 3. Genes positively associated with T2D in GEM-PLS of cohort 1 and 2, and in PLS of cohort 3.

**Table S4a**. Cohorts 1. Genes downregulated by bariatric surgery by ANOVA.

**Table S4b**. Cohorts 1. Genes upregulated by bariatric surgery by ANOVA.

**Table S5a**. Cohort 1. Genes negatively associated to T2D in GEM-PLS of cohort 1 and 2 and upregulated by bariatric surgery in cohort 1 by ANOVA

**Table S5b**. Cohort 1. Genes positively associated to T2D in GEM-PLS of cohort 1 and 2 and downregulated by bariatric surgery in cohort 1 by ANOVA
