# Supplementary material for: Transcriptome of Subcutaneous Adipose Tissue reflect Membrane Dysfunction and Impaired Oxidative Processes in T2D across Heterogenous Populations
Source: Research Square preprint supplement (doi:10.21203/rs.3.rs-7053974/v1), 2025-11-14
Supplement: Supplementary file 4 [file 4c6df17532f643e69b417542.xlsx]

## Sheet: Gene and protein names
Gene symbols	Association ID	Ensemble ID	Protein names
ABCC13	ILMN_1709092	ENSG00000243064	ATP binding cassette subfamily C member 13 (pseudogene)
ABCC13	ILMN_1709092	ENSG00000291052	ATP binding cassette subfamily C member 13 (pseudogene)
ABCC2	ILMN_1676278	ENSG00000023839	ATP binding cassette subfamily C member 2
ACAP1	ILMN_1808395	ENSG00000072818	ArfGAP with coiled-coil, ankyrin repeat and PH domains 1
ACSL5	ILMN_1678517	ENSG00000197142	acyl-CoA synthetase long chain family member 5
ACSS1	ILMN_1752269	ENSG00000154930	acyl-CoA synthetase short chain family member 1
ACTA1	ILMN_2125869	ENSG00000143632	actin alpha 1, skeletal muscle
ACTA2	ILMN_1671703	ENSG00000107796	actin alpha 2, smooth muscle
ACTBL2	ILMN_2139989	ENSG00000169067	actin beta like 2
ACTL6A	ILMN_1749297	ENSG00000136518	actin like 6A
ACTL6A	ILMN_2328280	ENSG00000136518	actin like 6A
ACVR1B	ILMN_1766723	ENSG00000135503	activin A receptor type 1B
ACVR2A	ILMN_2152711	ENSG00000121989	activin A receptor type 2A
ADAM23	ILMN_2060086	ENSG00000114948	ADAM metallopeptidase domain 23
ADAM28	ILMN_1802100	ENSG00000042980	ADAM metallopeptidase domain 28
ADAMTS7	ILMN_2211790	ENSG00000136378	ADAM metallopeptidase with thrombospondin type 1 motif 7
ADAMTSL2	ILMN_1721495	ENSG00000197859	ADAMTS like 2
ADARB1	ILMN_1697628	ENSG00000197381	adenosine deaminase RNA specific B1
ADARB1	ILMN_1679797	ENSG00000197381	adenosine deaminase RNA specific B1
ADCY1	ILMN_2120555	ENSG00000164742	adenylate cyclase 1
ADCY3	ILMN_1676893	ENSG00000138031	adenylate cyclase 3
ADCY6	ILMN_1685156	ENSG00000174233	adenylate cyclase 6
ADGRF1	ILMN_2241124	ENSG00000153292	adhesion G protein-coupled receptor F1
ADGRF4	ILMN_1684653	ENSG00000153294	adhesion G protein-coupled receptor F4
ADGRL3	ILMN_1692623	ENSG00000150471	adhesion G protein-coupled receptor L3
ADORA1	ILMN_2373444	ENSG00000163485	adenosine A1 receptor
ADPRHL1	ILMN_1795788	ENSG00000153531	ADP-ribosylhydrolase like 1
AFAP1	ILMN_1701998	ENSG00000196526	actin filament associated protein 1
AFAP1L2	ILMN_2404917	ENSG00000169129	actin filament associated protein 1 like 2
AGBL4	ILMN_2196642	ENSG00000186094	AGBL carboxypeptidase 4
AGBL5	ILMN_2290776	ENSG00000084693	AGBL carboxypeptidase 5
AKR1A1	ILMN_1728047	ENSG00000117448	aldo-keto reductase family 1 member A1
ALDH3A1	ILMN_1702503	ENSG00000108602	aldehyde dehydrogenase 3 family member A1
ALG8	ILMN_2365686	ENSG00000159063	ALG8 alpha-1,3-glucosyltransferase
ALS2CL	ILMN_1702322	ENSG00000178038	ALS2 C-terminal like
AMACR	ILMN_2367172	ENSG00000242110	alpha-methylacyl-CoA racemase
AMELY	ILMN_1727258	ENSG00000099721	amelogenin Y-linked
AMFR	ILMN_1723116	ENSG00000159461	autocrine motility factor receptor
AMMECR1	ILMN_1779374	ENSG00000101935	AMMECR nuclear protein 1
AMPD3	ILMN_1731223	ENSG00000133805	adenosine monophosphate deaminase 3
ANAPC5	ILMN_1723177	ENSG00000089053	anaphase promoting complex subunit 5
ANKDD1A	ILMN_1813139	ENSG00000166839	ankyrin repeat and death domain containing 1A
ANKHD1-EIF4EBP3	ILMN_1766560	ENSG00000254996	ANKHD1-EIF4EBP3 readthrough
ANKRD16	ILMN_1659156	ENSG00000134461	ankyrin repeat domain 16
ANKRD30BL	ILMN_1801641	ENSG00000163046	ankyrin repeat domain 30B like
ANKRD30BP2	ILMN_1801641	ENSG00000224309	ankyrin repeat domain 30B pseudogene 2
ANKRD36	ILMN_2280568	ENSG00000135976	ankyrin repeat domain 36
ANKRD36C	ILMN_1811117	ENSG00000174501	ankyrin repeat domain 36C
ANO9	ILMN_1798679	ENSG00000185101	anoctamin 9
AP1S1	ILMN_2316173	ENSG00000106367	adaptor related protein complex 1 subunit sigma 1
AP2B1	ILMN_1681998	ENSG00000006125	adaptor related protein complex 2 subunit beta 1
AP4E1	ILMN_1754531	ENSG00000081014	adaptor related protein complex 4 subunit epsilon 1
APEX1	ILMN_1661886	ENSG00000100823	apurinic/apyrimidinic endodeoxyribonuclease 1
APRT	ILMN_1726410	ENSG00000198931	adenine phosphoribosyltransferase
ARF5	ILMN_1752340	ENSG00000004059	ADP ribosylation factor 5
ARL3	ILMN_1780444	ENSG00000138175	ADP ribosylation factor like GTPase 3
ARL9	ILMN_1777691	ENSG00000196503	ADP ribosylation factor like GTPase 9
ARMC7	ILMN_1797298	ENSG00000125449	armadillo repeat containing 7
ARTN	ILMN_1773295	ENSG00000117407	artemin
ASB6	ILMN_1806705	ENSG00000148331	ankyrin repeat and SOCS box containing 6
ASTN2	ILMN_1797283	ENSG00000148219	astrotactin 2
ATP5F1D	ILMN_1679178	ENSG00000099624	ATP synthase F1 subunit delta
ATP5IF1	ILMN_1685978	ENSG00000130770	ATP synthase inhibitory factor subunit 1
ATP6V1G2-DDX39B	ILMN_1686626	ENSG00000254870	ATP6V1G2-DDX39B readthrough (NMD candidate)
AVIL	ILMN_1674265	ENSG00000135407	advillin
AZIN1	ILMN_1656682	ENSG00000155096	antizyme inhibitor 1
B3GALT6	ILMN_1739749	ENSG00000176022	beta-1,3-galactosyltransferase 6
B3GAT2	ILMN_1774208	ENSG00000112309	beta-1,3-glucuronyltransferase 2
B3GLCT	ILMN_1764813	ENSG00000187676	beta 3-glucosyltransferase
B4GALT4	ILMN_1661500	ENSG00000121578	beta-1,4-galactosyltransferase 4
BCDIN3D	ILMN_1796113	ENSG00000186666	BCDIN3 domain containing RNA methyltransferase
BCL2L12	ILMN_2396982	ENSG00000126453	BCL2 like 12
BCOR	ILMN_1773117	ENSG00000183337	BCL6 corepressor
BCOR	ILMN_1676241	ENSG00000183337	BCL6 corepressor
BDH2	ILMN_1673360	ENSG00000164039	3-hydroxybutyrate dehydrogenase 2
BFSP1	ILMN_1712608	ENSG00000125864	beaded filament structural protein 1
BLM	ILMN_1709484	ENSG00000197299	BLM RecQ like helicase
BOC	ILMN_1803956	ENSG00000144857	BOC cell adhesion associated, oncogene regulated
BRD4	ILMN_1736981	ENSG00000141867	bromodomain containing 4
BSCL2	ILMN_1697054	ENSG00000168000	BSCL2 lipid droplet biogenesis associated, seipin
BTN2A1	ILMN_1783392	ENSG00000112763	butyrophilin subfamily 2 member A1
BUB1B	ILMN_1797307	ENSG00000156970	BUB1 mitotic checkpoint serine/threonine kinase B
BUB1B-PAK6	ILMN_1797307	ENSG00000259288	BUB1B-PAK6 readthrough
C12orf57	ILMN_1812191	ENSG00000111678	chromosome 12 open reading frame 57
C17orf58	ILMN_1700515	ENSG00000186665	chromosome 17 open reading frame 58
C17orf58	ILMN_2398926	ENSG00000186665	chromosome 17 open reading frame 58
C1orf35	ILMN_1790202	ENSG00000143793	chromosome 1 open reading frame 35
C1QTNF3-AMACR	ILMN_2367172	ENSG00000273294	C1QTNF3-AMACR readthrough (NMD candidate)
C1QTNF5	ILMN_1744487	ENSG00000223953	C1q and TNF related 5
C3orf70	ILMN_2135339	ENSG00000187068	chromosome 3 open reading frame 70
C7orf50	ILMN_1718336	ENSG00000146540	chromosome 7 open reading frame 50
CACNA1H	ILMN_1671263	ENSG00000196557	calcium voltage-gated channel subunit alpha1 H
CACNA1I	ILMN_2300664	ENSG00000100346	calcium voltage-gated channel subunit alpha1 I
CACNB2	ILMN_2406106	ENSG00000165995	calcium voltage-gated channel auxiliary subunit beta 2
CALCA	ILMN_1807034	ENSG00000110680	calcitonin related polypeptide alpha
CALCOCO2	ILMN_1755504	ENSG00000136436	calcium binding and coiled-coil domain 2
CAMK1D	ILMN_1795561	ENSG00000183049	calcium/calmodulin dependent protein kinase ID
CAPN10	ILMN_1769755	ENSG00000142330	calpain 10
CARD19	ILMN_1659189	ENSG00000165233	caspase recruitment domain family member 19
CASP2	ILMN_2296057	ENSG00000106144	caspase 2
CASP2	ILMN_1736568	ENSG00000106144	caspase 2
CASP2	ILMN_2410540	ENSG00000106144	caspase 2
CAST	ILMN_1783627	ENSG00000153113	calpastatin
CASZ1	ILMN_2256953	ENSG00000130940	castor zinc finger 1
CBLN2	ILMN_1796069	ENSG00000141668	cerebellin 2 precursor
CBR4	ILMN_1813400	ENSG00000145439	carbonyl reductase 4
CBX6	ILMN_1691930	ENSG00000183741	chromobox 6
CCDC115	ILMN_1730347	ENSG00000136710	coiled-coil domain containing 115
CCDC136	ILMN_1706935	ENSG00000128596	coiled-coil domain containing 136
CCDC149	ILMN_1792276	ENSG00000181982	coiled-coil domain containing 149
CCDC167	ILMN_1651987	ENSG00000198937	coiled-coil domain containing 167
CCDC66	ILMN_1683533	ENSG00000180376	coiled-coil domain containing 66
CCDC77	ILMN_2101375	ENSG00000120647	coiled-coil domain containing 77
CCL19	ILMN_1769129	ENSG00000172724	C-C motif chemokine ligand 19
CCL21	ILMN_1677505	ENSG00000137077	C-C motif chemokine ligand 21
CCNB2	ILMN_1801939	ENSG00000157456	cyclin B2
CD3D	ILMN_2261416	ENSG00000167286	CD3 delta subunit of T-cell receptor complex
CD40	ILMN_2367818	ENSG00000101017	CD40 molecule
CD47	ILMN_1771333	ENSG00000196776	CD47 molecule
CDAN1	ILMN_1659727	ENSG00000140326	codanin 1
CDC25B	ILMN_2338323	ENSG00000101224	cell division cycle 25B
CDC42EP5	ILMN_1774982	ENSG00000167617	CDC42 effector protein 5
CDH3	ILMN_1704294	ENSG00000062038	cadherin 3
CDK18	ILMN_2389218	ENSG00000117266	cyclin dependent kinase 18
CDK5RAP1	ILMN_1812289	ENSG00000101391	CDK5 regulatory subunit associated protein 1
CDS1	ILMN_1801476	ENSG00000163624	CDP-diacylglycerol synthase 1
CELF6	ILMN_1656045	ENSG00000140488	CUGBP Elav-like family member 6
CEMIP	ILMN_1813704	ENSG00000103888	cell migration inducing hyaluronidase 1
CENPF	ILMN_1664516	ENSG00000117724	centromere protein F
CENPX	ILMN_1769634	ENSG00000169689	centromere protein X
CEP135	ILMN_1693766	ENSG00000174799	centrosomal protein 135
CEP15	ILMN_2224486	ENSG00000114405	centrosomal protein 15
CEP170B	ILMN_1664960	ENSG00000099814	centrosomal protein 170B
CEP44	ILMN_2213199	ENSG00000164118	centrosomal protein 44
CERS3	ILMN_1743142	ENSG00000154227	ceramide synthase 3
CFAP20DC	ILMN_1697761	ENSG00000163689	CFAP20 domain containing
CFAP65	ILMN_2306935	ENSG00000181378	cilia and flagella associated protein 65
CGB7	ILMN_2083578	ENSG00000196337	chorionic gonadotropin subunit beta 7
CHD4	ILMN_1658411	ENSG00000111642	chromodomain helicase DNA binding protein 4
CHRNA10	ILMN_1776314	ENSG00000129749	cholinergic receptor nicotinic alpha 10 subunit
CHRNG	ILMN_1784633	ENSG00000196811	cholinergic receptor nicotinic gamma subunit
CIAO1	ILMN_2048793	ENSG00000144021	cytosolic iron-sulfur assembly component 1
CKLF-CMTM1	ILMN_2328363	ENSG00000254788	CKLF-CMTM1 readthrough
CLASRP	ILMN_2146566	ENSG00000104859	CLK4 associating serine/arginine rich protein
CLCN6	ILMN_1741594	ENSG00000011021	chloride voltage-gated channel 6
CLDN10	ILMN_1737096	ENSG00000134873	claudin 10
CLDN10	ILMN_1721818	ENSG00000134873	claudin 10
CLEC4GP1	ILMN_1740502	ENSG00000268297	C-type lectin domain family 4 member G pseudogene 1
CLK2	ILMN_1787109	ENSG00000176444	CDC like kinase 2
CLPSL2	ILMN_2054121	ENSG00000196748	colipase like 2
CMTM1	ILMN_2328363	ENSG00000089505	CKLF like MARVEL transmembrane domain containing 1
CNOT6	ILMN_2136177	ENSG00000113300	CCR4-NOT transcription complex subunit 6
CNTN1	ILMN_1661852	ENSG00000018236	contactin 1
CNTNAP1	ILMN_1692398	ENSG00000108797	contactin associated protein 1
CNTNAP2	ILMN_1690223	ENSG00000174469	contactin associated protein 2
CNTRL	ILMN_1758778	ENSG00000119397	centriolin
COA3	ILMN_2064898	ENSG00000183978	cytochrome c oxidase assembly factor 3
COG5	ILMN_2399877	ENSG00000164597	component of oligomeric golgi complex 5
COL4A5	ILMN_1742534	ENSG00000188153	collagen type IV alpha 5 chain
COL4A5	ILMN_2375360	ENSG00000188153	collagen type IV alpha 5 chain
COL4A6	ILMN_1675857	ENSG00000197565	collagen type IV alpha 6 chain
COLGALT2	ILMN_1736742	ENSG00000198756	collagen beta(1-O)galactosyltransferase 2
COMMD3	ILMN_1690392	ENSG00000148444	COMM domain containing 3
COPS7A	ILMN_1758412	ENSG00000111652	COP9 signalosome subunit 7A
COPZ1	ILMN_1728535	ENSG00000111481	COPI coat complex subunit zeta 1
COQ3	ILMN_1801378	ENSG00000132423	coenzyme Q3, methyltransferase
CPSF6	ILMN_1795454	ENSG00000111605	cleavage and polyadenylation specific factor 6
CREB5	ILMN_1744441	ENSG00000146592	cAMP responsive element binding protein 5
CRELD2	ILMN_1748707	ENSG00000184164	cysteine rich with EGF like domains 2
CRTAC1	ILMN_1658384	ENSG00000095713	cartilage acidic protein 1
CS	ILMN_1709775	ENSG00000062485	citrate synthase
CSRP1	ILMN_1811921	ENSG00000159176	cysteine and glycine rich protein 1
CTPS2	ILMN_2392356	ENSG00000047230	CTP synthase 2
CUTA	ILMN_1712390	ENSG00000112514	cutA divalent cation tolerance homolog
CXCL10	ILMN_1791759	ENSG00000169245	C-X-C motif chemokine ligand 10
CYB561	ILMN_1771179	ENSG00000008283	cytochrome b561
CYB561	ILMN_2378376	ENSG00000008283	cytochrome b561
CYFIP2	ILMN_2354478	ENSG00000055163	cytoplasmic FMR1 interacting protein 2
CYP19A1	ILMN_2387860	ENSG00000137869	cytochrome P450 family 19 subfamily A member 1
CYP8B1	ILMN_1669802	ENSG00000180432	cytochrome P450 family 8 subfamily B member 1
CYTIP	ILMN_2092041	ENSG00000115165	cytohesin 1 interacting protein
DACT1	ILMN_2250344	ENSG00000165617	dishevelled binding antagonist of beta catenin 1
DACT3	ILMN_1733851	ENSG00000197380	dishevelled binding antagonist of beta catenin 3
DAD1	ILMN_1731619	ENSG00000129562	defender against cell death 1
DCAF12	ILMN_1786328	ENSG00000198876	DDB1 and CUL4 associated factor 12
DCAF7	ILMN_1682264	ENSG00000136485	DDB1 and CUL4 associated factor 7
DDIT3	ILMN_1676984	ENSG00000175197	DNA damage inducible transcript 3
DDX39B	ILMN_1686626	ENSG00000198563	DExD-box helicase 39B
DEFA4	ILMN_1753347	ENSG00000164821	defensin alpha 4
DEFB105A	ILMN_1722505	ENSG00000186562	defensin beta 105A
DEFB105B	ILMN_1722505	ENSG00000186599	defensin beta 105B
DENND2B	ILMN_2350183	ENSG00000166444	DENN domain containing 2B
DENND6B	ILMN_1659029	ENSG00000205593	DENN domain containing 6B
DGUOK	ILMN_1743432	ENSG00000114956	deoxyguanosine kinase
DHCR7	ILMN_2165867	ENSG00000172893	7-dehydrocholesterol reductase
DIDO1	ILMN_1763605	ENSG00000101191	death inducer-obliterator 1
DIP2A	ILMN_1729272	ENSG00000160305	disco interacting protein 2 homolog A
DISC1	ILMN_1676632	ENSG00000162946	DISC1 scaffold protein
DKK3	ILMN_1815673	ENSG00000050165	dickkopf WNT signaling pathway inhibitor 3
DKK3	ILMN_2398159	ENSG00000050165	dickkopf WNT signaling pathway inhibitor 3
DMAC1	ILMN_1769409	ENSG00000137038	distal membrane arm assembly component 1
DMBT1	ILMN_2410612	ENSG00000187908	deleted in malignant brain tumors 1
DNAH1	ILMN_1685052	ENSG00000114841	dynein axonemal heavy chain 1
DNAJC12	ILMN_2311020	ENSG00000108176	DnaJ heat shock protein family (Hsp40) member C12
DOCK9	ILMN_1773413	ENSG00000088387	dedicator of cytokinesis 9
DOP1A	ILMN_1739156	ENSG00000083097	DOP1 leucine zipper like protein A
DPRX	ILMN_1653158	ENSG00000204595	divergent-paired related homeobox
DPYSL2	ILMN_1672503	ENSG00000092964	dihydropyrimidinase like 2
DRAM1	ILMN_1669376	ENSG00000136048	DNA damage regulated autophagy modulator 1
DSCAML1	ILMN_2075962	ENSG00000177103	DS cell adhesion molecule like 1
DSE	ILMN_2283001	ENSG00000111817	dermatan sulfate epimerase
DTX2P1-UPK3BP1-PMS2P11	ILMN_1787931	ENSG00000265479	DTX2P1-UPK3BP1-PMS2P11 readthrough, transcribed pseudogene
DTX3	ILMN_1658677	ENSG00000178498	deltex E3 ubiquitin ligase 3
DUT	ILMN_1732688	ENSG00000128951	deoxyuridine triphosphatase
DXO	ILMN_1726990	ENSG00000204348	decapping exoribonuclease
DYNC1H1	ILMN_1780302	ENSG00000197102	dynein cytoplasmic 1 heavy chain 1
E2F2	ILMN_1777233	ENSG00000007968	E2F transcription factor 2
EARS2	ILMN_1758750	ENSG00000103356	glutamyl-tRNA synthetase 2, mitochondrial
EBF2	ILMN_2110919	ENSG00000221818	EBF transcription factor 2
ECPAS	ILMN_2261882	ENSG00000136813	Ecm29 proteasome adaptor and scaffold
ECRG4	ILMN_1676822	ENSG00000119147	ECRG4 augurin precursor
EFS	ILMN_1702105	ENSG00000100842	embryonal Fyn-associated substrate
EI24	ILMN_1669394	ENSG00000149547	EI24 autophagy associated transmembrane protein
ENDOG	ILMN_1722309	ENSG00000167136	endonuclease G
ENO2	ILMN_1765796	ENSG00000111674	enolase 2
ENO3	ILMN_1678904	ENSG00000108515	enolase 3
ENTREP1	ILMN_2179717	ENSG00000135063	endosomal transmembrane epsin interactor 1
EOMES	ILMN_1760509	ENSG00000163508	eomesodermin
EPHA1	ILMN_1664265	ENSG00000146904	EPH receptor A1
EPHB3	ILMN_1741346	ENSG00000182580	EPH receptor B3
EPM2AIP1	ILMN_1682658	ENSG00000178567	EPM2A interacting protein 1
EPRS1	ILMN_1783695	ENSG00000136628	glutamyl-prolyl-tRNA synthetase 1
ERCC2	ILMN_1815859	ENSG00000104884	ERCC excision repair 2, TFIIH core complex helicase subunit
ETV5	ILMN_1739222	ENSG00000244405	ETS variant transcription factor 5
EXOSC10	ILMN_1711189	ENSG00000171824	exosome component 10
EZH2	ILMN_2364529	ENSG00000106462	enhancer of zeste 2 polycomb repressive complex 2 subunit
FABP6	ILMN_2392261	ENSG00000170231	fatty acid binding protein 6
FAM124A	ILMN_1674827	ENSG00000150510	family with sequence similarity 124 member A
FAM13C	ILMN_2409055	ENSG00000148541	family with sequence similarity 13 member C
FAM167A	ILMN_1687213	ENSG00000154319	family with sequence similarity 167 member A
FAM220A	ILMN_1717219	ENSG00000178397	family with sequence similarity 220 member A
FAM220CP	ILMN_1717219	ENSG00000213612	family with sequence similarity 220 member C, pseudogene
FAM24A	ILMN_1783969	ENSG00000203795	family with sequence similarity 24 member A
FBLIM1	ILMN_2353143	ENSG00000162458	filamin binding LIM protein 1
FBXO9	ILMN_1667120	ENSG00000112146	F-box protein 9
FBXW11	ILMN_2394571	ENSG00000072803	F-box and WD repeat domain containing 11
FEZ1	ILMN_1779071	ENSG00000149557	fasciculation and elongation protein zeta 1
FGD5	ILMN_2104141	ENSG00000154783	FYVE, RhoGEF and PH domain containing 5
FGF12	ILMN_1810283	ENSG00000114279	fibroblast growth factor 12
FGF18	ILMN_1693483	ENSG00000156427	fibroblast growth factor 18
FGF4	ILMN_1677456	ENSG00000075388	fibroblast growth factor 4
FGF7	ILMN_1731240	ENSG00000140285	fibroblast growth factor 7
FIBP	ILMN_1657797	ENSG00000172500	FGF1 intracellular binding protein
FKBP1B	ILMN_2303955	ENSG00000119782	FKBP prolyl isomerase 1B
FKBP2	ILMN_1674337	ENSG00000173486	FKBP prolyl isomerase 2
FKTN	ILMN_1784156	ENSG00000106692	fukutin
FLNB	ILMN_1664922	ENSG00000136068	filamin B
FMNL3	ILMN_1657955	ENSG00000161791	formin like 3
FMNL3	ILMN_2395214	ENSG00000161791	formin like 3
FNBP1	ILMN_1797342	ENSG00000187239	formin binding protein 1
FNDC5	ILMN_1761084	ENSG00000160097	fibronectin type III domain containing 5
FPGS	ILMN_1713948	ENSG00000136877	folylpolyglutamate synthase
FRA10AC1	ILMN_1672711	ENSG00000148690	FRA10A associated CGG repeat 1
FSCN2	ILMN_1713247	ENSG00000186765	fascin actin-bundling protein 2, retinal
FSCN3	ILMN_1752340	ENSG00000106328	fascin actin-bundling protein 3
FTMT	ILMN_1702498	ENSG00000181867	ferritin mitochondrial
FUT4	ILMN_1792072	ENSG00000196371	fucosyltransferase 4
FXN	ILMN_1774826	ENSG00000165060	frataxin
FXYD2	ILMN_2289593	ENSG00000137731	FXYD domain containing ion transport regulator 2
FYN	ILMN_1686555	ENSG00000010810	FYN proto-oncogene, Src family tyrosine kinase
FYN	ILMN_2249920	ENSG00000010810	FYN proto-oncogene, Src family tyrosine kinase
FZD2	ILMN_1653711	ENSG00000180340	frizzled class receptor 2
G2E3	ILMN_1680643	ENSG00000092140	G2/M-phase specific E3 ubiquitin protein ligase
GABBR1	ILMN_2395375	ENSG00000204681	gamma-aminobutyric acid type B receptor subunit 1
GAL3ST4	ILMN_1693452	ENSG00000197093	galactose-3-O-sulfotransferase 4
GALK1	ILMN_1803194	ENSG00000108479	galactokinase 1
GALNT10	ILMN_1681984	ENSG00000164574	polypeptide N-acetylgalactosaminyltransferase 10
GAS2L1	ILMN_1724059	ENSG00000185340	growth arrest specific 2 like 1
GATA3	ILMN_2406656	ENSG00000107485	GATA binding protein 3
GCHFR	ILMN_1694780	ENSG00000137880	GTP cyclohydrolase I feedback regulator
GDPGP1	ILMN_1810855	ENSG00000183208	GDP-D-glucose phosphorylase 1
GEMIN8	ILMN_2364088	ENSG00000046647	gem nuclear organelle associated protein 8
Gene names	Association ID	Ensemble ID	Protein names
GFRA4	ILMN_1779047	ENSG00000125861	GDNF family receptor alpha 4
GGTA1	ILMN_2212780	ENSG00000204136	glycoprotein alpha-galactosyltransferase 1 (inactive)
GID8	ILMN_1755909	ENSG00000101193	GID complex subunit 8 homolog
GIGYF2	ILMN_1750718	ENSG00000204120	GRB10 interacting GYF protein 2
GINS2	ILMN_1809590	ENSG00000131153	GINS complex subunit 2
GIPC1	ILMN_2342903	ENSG00000123159	GIPC PDZ domain containing family member 1
GJC2	ILMN_1723048	ENSG00000198835	gap junction protein gamma 2
GLCE	ILMN_1714349	ENSG00000138604	glucuronic acid epimerase
GLIS2	ILMN_1710985	ENSG00000126603	GLIS family zinc finger 2
GLYATL1	ILMN_1769032	ENSG00000166840	glycine-N-acyltransferase like 1
GMPPA	ILMN_1804476	ENSG00000144591	GDP-mannose pyrophosphorylase A
GMPPB	ILMN_2412927	ENSG00000173540	GDP-mannose pyrophosphorylase B
GNB1	ILMN_1760320	ENSG00000078369	G protein subunit beta 1
GOLGA3	ILMN_1733511	ENSG00000090615	golgin A3
GOSR2	ILMN_1722812	ENSG00000108433	golgi SNAP receptor complex member 2
GPM6A	ILMN_1716869	ENSG00000150625	glycoprotein M6A
GPR161	ILMN_1773940	ENSG00000143147	G protein-coupled receptor 161
GPR39	ILMN_1688768	ENSG00000183840	G protein-coupled receptor 39
GPRIN2	ILMN_1803217	ENSG00000204175	G protein regulated inducer of neurite outgrowth 2
GPSM2	ILMN_2139816	ENSG00000121957	G protein signaling modulator 2
GRHL3	ILMN_1782141	ENSG00000158055	grainyhead like transcription factor 3
GRIA3	ILMN_1782043	ENSG00000125675	glutamate ionotropic receptor AMPA type subunit 3
GRIA4	ILMN_2322100	ENSG00000152578	glutamate ionotropic receptor AMPA type subunit 4
GRIK1	ILMN_1773114	ENSG00000171189	glutamate ionotropic receptor kainate type subunit 1
GRIPAP1	ILMN_1719857	ENSG00000068400	GRIP1 associated protein 1
GRM2	ILMN_1693604	ENSG00000164082	glutamate metabotropic receptor 2
GTF2A1	ILMN_1732040	ENSG00000165417	general transcription factor IIA subunit 1
GTPBP3	ILMN_1748894	ENSG00000130299	GTP binding protein 3, mitochondrial
GUCY1A1	ILMN_2131177	ENSG00000164116	guanylate cyclase 1 soluble subunit alpha 1
GUK1	ILMN_1758398	ENSG00000143774	guanylate kinase 1
GYG1	ILMN_2230862	ENSG00000163754	glycogenin 1
GYPC	ILMN_1668039	ENSG00000136732	glycophorin C (Gerbich blood group)
GYPC	ILMN_1682332	ENSG00000136732	glycophorin C (Gerbich blood group)
HAND2	ILMN_2064902	ENSG00000164107	heart and neural crest derivatives expressed 2
HBD	ILMN_1815527	ENSG00000223609	hemoglobin subunit delta
HCRTR2	ILMN_1678065	ENSG00000137252	hypocretin receptor 2
HDAC3	ILMN_1772455	ENSG00000171720	histone deacetylase 3
HDGFL2	ILMN_2325978	ENSG00000167674	HDGF like 2
HELQ	ILMN_1720440	ENSG00000163312	helicase, POLQ like
HEPH	ILMN_1714523	ENSG00000089472	hephaestin
HERC1	ILMN_1786211	ENSG00000103657	HECT and RLD domain containing E3 ubiquitin protein ligase family member 1
HEY2	ILMN_1682034	ENSG00000135547	hes related family bHLH transcription factor with YRPW motif 2
HEYL	ILMN_1654324	ENSG00000163909	hes related family bHLH transcription factor with YRPW motif like
HGF	ILMN_1757838	ENSG00000019991	hepatocyte growth factor
HMOX2	ILMN_1658807	ENSG00000103415	heme oxygenase 2
HNRNPUL1	ILMN_1690268	ENSG00000105323	heterogeneous nuclear ribonucleoprotein U like 1
HOMER3	ILMN_1811579	ENSG00000051128	homer scaffold protein 3
HOPX	ILMN_2316236	ENSG00000171476	HOP homeobox
HOXA2	ILMN_2107068	ENSG00000105996	homeobox A2
HOXA4	ILMN_1677018	ENSG00000197576	homeobox A4
HOXB7	ILMN_1702125	ENSG00000260027	homeobox B7
HOXD1	ILMN_1717381	ENSG00000128645	homeobox D1
HRNR	ILMN_1687510	ENSG00000197915	hornerin
HS3ST4	ILMN_1665998	ENSG00000182601	heparan sulfate-glucosamine 3-sulfotransferase 4
HS6ST2	ILMN_2298755	ENSG00000171004	heparan sulfate 6-O-sulfotransferase 2
HSD11B2	ILMN_1813350	ENSG00000176387	hydroxysteroid 11-beta dehydrogenase 2
HSD17B2	ILMN_1808713	ENSG00000086696	hydroxysteroid 17-beta dehydrogenase 2
HSF2	ILMN_1800311	ENSG00000025156	heat shock transcription factor 2
HSPA2	ILMN_2153916	ENSG00000126803	heat shock protein family A (Hsp70) member 2
HSPA5	ILMN_1773865	ENSG00000044574	heat shock protein family A (Hsp70) member 5
HSPA8	ILMN_1686367	ENSG00000109971	heat shock protein family A (Hsp70) member 8
HTR3A	ILMN_1681492	ENSG00000166736	5-hydroxytryptamine receptor 3A
ICA1	ILMN_2365569	ENSG00000003147	islet cell autoantigen 1
ICA1	ILMN_1814787	ENSG00000003147	islet cell autoantigen 1
ICAM4	ILMN_1681296	ENSG00000105371	intercellular adhesion molecule 4 (Landsteiner-Wiener blood group)
ID3	ILMN_1732296	ENSG00000117318	inhibitor of DNA binding 3
IDH3G	ILMN_1802706	ENSG00000067829	isocitrate dehydrogenase (NAD(+)) 3 non-catalytic subunit gamma
IER5L	ILMN_1755620	ENSG00000188483	immediate early response 5 like
IFIT1B	ILMN_1759155	ENSG00000204010	interferon induced protein with tetratricopeptide repeats 1B
IFNA10	ILMN_1769988	ENSG00000186803	interferon alpha 10
IFNA17	ILMN_1652376	ENSG00000234829	interferon alpha 17
IFNA4	ILMN_1652376	ENSG00000236637	interferon alpha 4
IFRD1	ILMN_1687390	ENSG00000006652	interferon related developmental regulator 1
IGSF3	ILMN_1704353	ENSG00000143061	immunoglobulin superfamily member 3
IL32	ILMN_1778010	ENSG00000008517	interleukin 32
ILK	ILMN_2364376	ENSG00000166333	integrin linked kinase
IP6K1	ILMN_2412927	ENSG00000176095	inositol hexakisphosphate kinase 1
IP6K2	ILMN_2328835	ENSG00000068745	inositol hexakisphosphate kinase 2
IPO13	ILMN_1651229	ENSG00000117408	importin 13
IPO9	ILMN_1723117	ENSG00000198700	importin 9
IQCB1	ILMN_2316104	ENSG00000173226	IQ motif containing B1
IRAG1	ILMN_1766157	ENSG00000072952	inositol 1,4,5-triphosphate receptor associated 1
IRAK1	ILMN_2379130	ENSG00000184216	interleukin 1 receptor associated kinase 1
ITGAV	ILMN_2169439	ENSG00000138448	integrin subunit alpha V
ITGB3BP	ILMN_1692790	ENSG00000142856	integrin subunit beta 3 binding protein
ITPR1	ILMN_1789505	ENSG00000150995	inositol 1,4,5-trisphosphate receptor type 1
ITPR3	ILMN_1815500	ENSG00000096433	inositol 1,4,5-trisphosphate receptor type 3
JAG1	ILMN_1691376	ENSG00000101384	jagged canonical Notch ligand 1
JMJD6	ILMN_1666068	ENSG00000070495	jumonji domain containing 6, arginine demethylase and lysine hydroxylase
JMJD7-PLA2G4B	ILMN_1697629	ENSG00000168970	JMJD7-PLA2G4B readthrough
JPH1	ILMN_1693985	ENSG00000104369	junctophilin 1
KAT2A	ILMN_1782247	ENSG00000108773	lysine acetyltransferase 2A
KAZALD1	ILMN_1684755	ENSG00000107821	Kazal type serine peptidase inhibitor domain 1
KBTBD12	ILMN_1713523	ENSG00000187715	kelch repeat and BTB domain containing 12
KCNA5	ILMN_1790508	ENSG00000130037	potassium voltage-gated channel subfamily A member 5
KCNG1	ILMN_2293363	ENSG00000026559	potassium voltage-gated channel modifier subfamily G member 1
KCNH1	ILMN_1745529	ENSG00000143473	potassium voltage-gated channel subfamily H member 1
KCNH8	ILMN_1775348	ENSG00000183960	potassium voltage-gated channel subfamily H member 8
KCNJ16	ILMN_1813741	ENSG00000153822	potassium inwardly rectifying channel subfamily J member 16
KCNK17	ILMN_1717702	ENSG00000124780	potassium two pore domain channel subfamily K member 17
KCNMB1	ILMN_1652065	ENSG00000145936	potassium calcium-activated channel subfamily M regulatory beta subunit 1
KIF17	ILMN_1666625	ENSG00000117245	kinesin family member 17
KIF20B	ILMN_1712452	ENSG00000138182	kinesin family member 20B
KIF2C	ILMN_1685916	ENSG00000142945	kinesin family member 2C
KIF3A	ILMN_1653385	ENSG00000131437	kinesin family member 3A
KIF5C	ILMN_2212999	ENSG00000168280	kinesin family member 5C
KIRREL2	ILMN_2382245	ENSG00000126259	kirre like nephrin family adhesion molecule 2
KIAA1143	ILMN_2043360	ENSG00000163807	KIAA1143
KIAA1143P1	ILMN_2043360	ENSG00000259086	KIAA1143 pseudogene 1
KLF13	ILMN_1679929	ENSG00000169926	KLF transcription factor 13
KLK15	ILMN_2260715	ENSG00000174562	kallikrein related peptidase 15
KMT2A	ILMN_1668683	ENSG00000118058	lysine methyltransferase 2A
KMT2E	ILMN_1783606	ENSG00000005483	lysine methyltransferase 2E (inactive)
KRT222	ILMN_1801090	ENSG00000213424	keratin 222
KRTAP4-7	ILMN_1718202	ENSG00000240871	keratin associated protein 4-7
KRTAP5-2	ILMN_1802360	ENSG00000205867	keratin associated protein 5-2
LAGE3	ILMN_1708151	ENSG00000196976	L antigen family member 3
LARGE1	ILMN_1662038	ENSG00000133424	LARGE xylosyl- and glucuronyltransferase 1
LBH	ILMN_2315979	ENSG00000213626	LBH regulator of WNT signaling pathway
LCE3A	ILMN_1756522	ENSG00000185962	late cornified envelope 3A
LCMT1	ILMN_2336186	ENSG00000205629	leucine carboxyl methyltransferase 1
LCMT1	ILMN_2312709	ENSG00000205629	leucine carboxyl methyltransferase 1
LGALS8	ILMN_2266214	ENSG00000116977	galectin 8
LGI1	ILMN_2171023	ENSG00000108231	leucine rich glioma inactivated 1
LINGO1	ILMN_1756755	ENSG00000169783	leucine rich repeat and Ig domain containing 1
LRRC17	ILMN_2406815	ENSG00000128606	leucine rich repeat containing 17
LRRC20	ILMN_2408938	ENSG00000172731	leucine rich repeat containing 20
LRRC37A6P	ILMN_1786771	ENSG00000230445	leucine rich repeat containing 37 member A6, pseudogene
LRRC37A9P	ILMN_1786361	ENSG00000271013	leucine rich repeat containing 37 member A9, pseudogene
LRRC45	ILMN_1754827	ENSG00000169683	leucine rich repeat containing 45
LRRC74B	ILMN_1684704	ENSG00000187905	leucine rich repeat containing 74B
LRRN4CL	ILMN_1697054	ENSG00000177363	LRRN4 C-terminal like
LSAMP	ILMN_1739154	ENSG00000185565	limbic system associated membrane protein
LTO1	ILMN_1762549	ENSG00000149716	LTO1 maturation factor of ABCE1
MAGEA6	ILMN_2372681	ENSG00000197172	MAGE family member A6
MAGEB4	ILMN_1808418	ENSG00000120289	MAGE family member B4
MAGED2	ILMN_1684984	ENSG00000102316	MAGE family member D2
MAGEE2	ILMN_1707066	ENSG00000186675	MAGE family member E2
MAMLD1	ILMN_1680856	ENSG00000013619	mastermind like domain containing 1
MAP4K1	ILMN_1665943	ENSG00000104814	mitogen-activated protein kinase kinase kinase kinase 1
MAPK11	ILMN_1735361	ENSG00000185386	mitogen-activated protein kinase 11
MAPKBP1	ILMN_1658261	ENSG00000137802	mitogen-activated protein kinase binding protein 1
MARCHF4	ILMN_1789991	ENSG00000144583	membrane associated ring-CH-type finger 4
MARCHF8	ILMN_2336335	ENSG00000165406	membrane associated ring-CH-type finger 8
MARS2	ILMN_2136423	ENSG00000247626	methionyl-tRNA synthetase 2, mitochondrial
MARVELD2	ILMN_2293744	ENSG00000152939	MARVEL domain containing 2
MB	ILMN_2364864	ENSG00000198125	myoglobin
MBD1	ILMN_1683595	ENSG00000141644	methyl-CpG binding domain protein 1
MDC1	ILMN_1814122	ENSG00000137337	mediator of DNA damage checkpoint 1
MED12	ILMN_1793386	ENSG00000184634	mediator complex subunit 12
MED17	ILMN_1730329	ENSG00000042429	mediator complex subunit 17
MED29	ILMN_1728360	ENSG00000063322	mediator complex subunit 29
MEG8	ILMN_1722632	ENSG00000225746	maternally expressed 8, small nucleolar RNA host gene
MEOX1	ILMN_1657145	ENSG00000005102	mesenchyme homeobox 1
METTL13	ILMN_1790575	ENSG00000010165	methyltransferase 13, eEF1A lysine and N-terminal methyltransferase
METTL16	ILMN_1790896	ENSG00000127804	methyltransferase 16, N6-methyladenosine
MEX3D	ILMN_2162465	ENSG00000181588	mex-3 RNA binding family member D
MFRP	ILMN_1744487	ENSG00000235718	membrane frizzled-related protein
MFSD2B	ILMN_2303955	ENSG00000205639	MFSD2 lysolipid transporter B, sphingolipid
MGAT4B	ILMN_1796106	ENSG00000161013	alpha-1,3-mannosyl-glycoprotein 4-beta-N-acetylglucosaminyltransferase B
MICAL2	ILMN_1785141	ENSG00000133816	microtubule associated monooxygenase, calponin and LIM domain containing 2
MICOS13	ILMN_1765684	ENSG00000174917	mitochondrial contact site and cristae organizing system subunit 13
MIPEP	ILMN_1669070	ENSG00000027001	mitochondrial intermediate peptidase
MIPOL1	ILMN_1710684	ENSG00000151338	mirror-image polydactyly 1
MIR1229	ILMN_1796106	ENSG00000221394	microRNA 1229
MIR1914	ILMN_2050255	ENSG00000284433	microRNA 1914
MIR646HG	ILMN_1657398	ENSG00000228340	MIR646 host gene
MIR661	ILMN_1709256	ENSG00000207574	microRNA 661
MIR6822	ILMN_1715332	ENSG00000284158	microRNA 6822
MIR6881	ILMN_1756312	ENSG00000277391	microRNA 6881
MIR7704	ILMN_1717381	ENSG00000283880	microRNA 7704
MIR99AHG	ILMN_2283814	ENSG00000215386	mir-99a-let-7c cluster host gene
MKNK1	ILMN_1725738	ENSG00000079277	MAPK interacting serine/threonine kinase 1
MLC1	ILMN_1690589	ENSG00000100427	modulator of VRAC current 1
MLH3	ILMN_1693107	ENSG00000119684	mutL homolog 3
MLLT11	ILMN_1759097	ENSG00000213190	MLLT11 transcription factor 7 cofactor
MMRN1	ILMN_1660114	ENSG00000138722	multimerin 1
MMS19	ILMN_2174394	ENSG00000155229	MMS19 homolog, cytosolic iron-sulfur assembly component
MOCOS	ILMN_1673522	ENSG00000075643	molybdenum cofactor sulfurase
MOXD1	ILMN_1761788	ENSG00000079931	monooxygenase DBH like 1
MRE11	ILMN_1658636	ENSG00000020922	MRE11 homolog, double strand break repair nuclease
MRPL24	ILMN_1695576	ENSG00000143314	mitochondrial ribosomal protein L24
MSMO1	ILMN_1720889	ENSG00000052802	methylsterol monooxygenase 1
MSX2P1	ILMN_2197647	ENSG00000229590	msh homeobox 2 pseudogene 1
MTHFD1L	ILMN_1772521	ENSG00000120254	methylenetetrahydrofolate dehydrogenase (NADP+ dependent) 1 like
MTHFR	ILMN_1734830	ENSG00000177000	methylenetetrahydrofolate reductase
MTMR11	ILMN_1769299	ENSG00000014914	myotubularin related protein 11
MTMR4	ILMN_1771019	ENSG00000108389	myotubularin related protein 4
MTUS1	ILMN_1685044	ENSG00000129422	microtubule associated scaffold protein 1
MUC1	ILMN_1756992	ENSG00000185499	mucin 1, cell surface associated
MYH11	ILMN_1660086	ENSG00000133392	myosin heavy chain 11
MYH9	ILMN_2087702	ENSG00000100345	myosin heavy chain 9
MYL9	ILMN_1675062	ENSG00000101335	myosin light chain 9
MYO18A	ILMN_2330806	ENSG00000196535	myosin XVIIIA
MYO1C	ILMN_2250820	ENSG00000197879	myosin IC
MYO9A	ILMN_2173919	ENSG00000066933	myosin IXA
MYOM3	ILMN_1719581	ENSG00000142661	myomesin 3
MYOZ3	ILMN_1774350	ENSG00000164591	myozenin 3
NABP2	ILMN_1704672	ENSG00000139579	nucleic acid binding protein 2
NACA	ILMN_2167616	ENSG00000196531	nascent polypeptide associated complex subunit alpha
NAGK	ILMN_1716547	ENSG00000124357	N-acetylglucosamine kinase
NAT1	ILMN_1743055	ENSG00000171428	N-acetyltransferase 1
NCALD	ILMN_1788538	ENSG00000104490	neurocalcin delta
NCALD	ILMN_2343097	ENSG00000104490	neurocalcin delta
NCDN	ILMN_1704354	ENSG00000020129	neurochondrin
NCKAP5	ILMN_2253822	ENSG00000176771	NCK associated protein 5
NDUFB7	ILMN_1813604	ENSG00000099795	NADH:ubiquinone oxidoreductase subunit B7
NECAP2	ILMN_1749011	ENSG00000157191	NECAP endocytosis associated 2
NEFM	ILMN_2215989	ENSG00000104722	neurofilament medium chain
NES	ILMN_1738147	ENSG00000132688	nestin
NFKB2	ILMN_1799062	ENSG00000077150	nuclear factor kappa B subunit 2
NHERF2	ILMN_1765833	ENSG00000065054	NHERF family PDZ scaffold protein 2
NKX2-2	ILMN_1692280	ENSG00000125820	NK2 homeobox 2
NMUR1	ILMN_1729287	ENSG00000171596	neuromedin U receptor 1
NOP56	ILMN_2209515	ENSG00000101361	NOP56 ribonucleoprotein
NPAS2	ILMN_1765558	ENSG00000170485	neuronal PAS domain protein 2
NPNT	ILMN_1735762	ENSG00000168743	nephronectin
NPRL2	ILMN_2191568	ENSG00000114388	NPR2 like, GATOR1 complex subunit
NPTN	ILMN_2336982	ENSG00000156642	neuroplastin
NR2F2	ILMN_2094360	ENSG00000185551	nuclear receptor subfamily 2 group F member 2
NRF1	ILMN_1656017	ENSG00000106459	nuclear respiratory factor 1
NRSN2	ILMN_1770911	ENSG00000125841	neurensin 2
NRXN1	ILMN_1781398	ENSG00000179915	neurexin 1
NRXN2	ILMN_1763047	ENSG00000110076	neurexin 2
NTNG1	ILMN_2189371	ENSG00000162631	netrin G1
NUP133	ILMN_1751338	ENSG00000069248	nucleoporin 133
NUP205	ILMN_1673962	ENSG00000155561	nucleoporin 205
NUP62	ILMN_1738681	ENSG00000213024	nucleoporin 62
NXPE3	ILMN_1814924	ENSG00000144815	neurexophilin and PC-esterase domain family member 3
NAALADL1	ILMN_1770963	ENSG00000168060	N-acetylated alpha-linked acidic dipeptidase like 1
OCIAD2	ILMN_1772286	ENSG00000145247	OCIA domain containing 2
ODAPH	ILMN_1794239	ENSG00000174792	odontogenesis associated phosphoprotein
OLFML2A	ILMN_1761425	ENSG00000185585	olfactomedin like 2A
OR2A1	ILMN_2074432	ENSG00000221970	olfactory receptor family 2 subfamily A member 1
OR2A12	ILMN_1704859	ENSG00000221858	olfactory receptor family 2 subfamily A member 12
OR2A14	ILMN_2074432	ENSG00000221938	olfactory receptor family 2 subfamily A member 14
OR2A42	ILMN_2074432	ENSG00000212807	olfactory receptor family 2 subfamily A member 42
OR4D1	ILMN_2197647	ENSG00000141194	olfactory receptor family 4 subfamily D member 1
OR5AC2	ILMN_1787849	ENSG00000196578	olfactory receptor family 5 subfamily AC member 2
OR8B2	ILMN_1815849	ENSG00000284680	olfactory receptor family 8 subfamily B member 2
ORAI1	ILMN_1724148	ENSG00000276045	ORAI calcium release-activated calcium modulator 1
ORC4	ILMN_1740083	ENSG00000115947	origin recognition complex subunit 4
OSBPL2	ILMN_2349124	ENSG00000130703	oxysterol binding protein like 2
OSBPL5	ILMN_2307032	ENSG00000021762	oxysterol binding protein like 5
OSGEP	ILMN_1753393	ENSG00000092094	O-sialoglycoprotein endopeptidase
P4HA2	ILMN_2280135	ENSG00000072682	prolyl 4-hydroxylase subunit alpha 2
PABPC1L2A	ILMN_1745409	ENSG00000186288	poly(A) binding protein cytoplasmic 1 like 2A
PAFAH1B3	ILMN_1748093	ENSG00000079462	platelet activating factor acetylhydrolase 1b catalytic subunit 3
PAGE5	ILMN_2363141	ENSG00000158639	PAGE family member 5
PAN2	ILMN_1658373	ENSG00000135473	poly(A) specific ribonuclease subunit PAN2
PAXX	ILMN_1761138	ENSG00000148362	PAXX non-homologous end joining factor
PCDHA9	ILMN_1784316	ENSG00000204961	protocadherin alpha 9
PCDHB13	ILMN_1766950	ENSG00000187372	protocadherin beta 13
PCDHGA1	ILMN_2251961	ENSG00000204956	protocadherin gamma subfamily A, 1
PCDHGA10	ILMN_2251961	ENSG00000253846	protocadherin gamma subfamily A, 10
PCDHGA11	ILMN_2251961	ENSG00000253873	protocadherin gamma subfamily A, 11
PCDHGA12	ILMN_2251961	ENSG00000253159	protocadherin gamma subfamily A, 12
PCDHGA2	ILMN_2251961	ENSG00000081853	protocadherin gamma subfamily A, 2
PCDHGA3	ILMN_2251961	ENSG00000254245	protocadherin gamma subfamily A, 3
PCDHGA4	ILMN_2251961	ENSG00000262576	protocadherin gamma subfamily A, 4
PCDHGA5	ILMN_2251961	ENSG00000253485	protocadherin gamma subfamily A, 5
PCDHGA6	ILMN_2251961	ENSG00000253731	protocadherin gamma subfamily A, 6
PCDHGA7	ILMN_2251961	ENSG00000253537	protocadherin gamma subfamily A, 7
PCDHGA8	ILMN_2251961	ENSG00000253767	protocadherin gamma subfamily A, 8
PCDHGA9	ILMN_2251961	ENSG00000261934	protocadherin gamma subfamily A, 9
PCDHGB1	ILMN_2251961	ENSG00000254221	protocadherin gamma subfamily B, 1
PCDHGB2	ILMN_2251961	ENSG00000253910	protocadherin gamma subfamily B, 2
PCDHGB3	ILMN_2251961	ENSG00000262209	protocadherin gamma subfamily B, 3
PCDHGB4	ILMN_2251961	ENSG00000253953	protocadherin gamma subfamily B, 4
PCDHGB5	ILMN_2251961	ENSG00000276547	protocadherin gamma subfamily B, 5
PCDHGB6	ILMN_2251961	ENSG00000253305	protocadherin gamma subfamily B, 6
PCDHGB7	ILMN_2251961	ENSG00000254122	protocadherin gamma subfamily B, 7
PCDHGC3	ILMN_2251961	ENSG00000240184	protocadherin gamma subfamily C, 3
PCDHGC4	ILMN_2251961	ENSG00000242419	protocadherin gamma subfamily C, 4
PCDHGC5	ILMN_2251961	ENSG00000240764	protocadherin gamma subfamily C, 5
PCF11	ILMN_1798602	ENSG00000165494	PCF11 cleavage and polyadenylation factor subunit
PCGF2	ILMN_1809859	ENSG00000277258	polycomb group ring finger 2
PCNA	ILMN_1706958	ENSG00000132646	proliferating cell nuclear antigen
PCSK1	ILMN_2081813	ENSG00000175426	proprotein convertase subtilisin/kexin type 1
PDE4D	ILMN_1791483	ENSG00000113448	phosphodiesterase 4D
PDE5A	ILMN_1810836	ENSG00000138735	phosphodiesterase 5A
PDE6A	ILMN_2195319	ENSG00000132915	phosphodiesterase 6A
PDGFRB	ILMN_1815057	ENSG00000113721	platelet derived growth factor receptor beta
PDIK1L	ILMN_1806328	ENSG00000175087	PDLIM1 interacting kinase 1 like
PEAK3	ILMN_1674926	ENSG00000188305	PEAK family member 3
PFAS	ILMN_1755862	ENSG00000178921	phosphoribosylformylglycinamidine synthase
PGBD1	ILMN_1791949	ENSG00000137338	piggyBac transposable element derived 1
PGLS	ILMN_1797005	ENSG00000130313	6-phosphogluconolactonase
PHF1	ILMN_2385866	ENSG00000112511	PHD finger protein 1
PI4KA	ILMN_1655177	ENSG00000241973	phosphatidylinositol 4-kinase alpha
PIBF1	ILMN_2227473	ENSG00000083535	progesterone immunomodulatory binding factor 1
PIGU	ILMN_1738263	ENSG00000101464	phosphatidylinositol glycan anchor biosynthesis class U
PITHD1	ILMN_1784207	ENSG00000057757	PITH domain containing 1
PLA1A	ILMN_1792506	ENSG00000144837	phospholipase A1 member A
PLA2G4B	ILMN_1697629	ENSG00000243708	phospholipase A2 group IVB
PLA2G4C	ILMN_1810191	ENSG00000105499	phospholipase A2 group IVC
PLA2R1	ILMN_1683016	ENSG00000153246	phospholipase A2 receptor 1
PLCB4	ILMN_2397294	ENSG00000101333	phospholipase C beta 4
PLEC	ILMN_1709256	ENSG00000178209	plectin
PLEC	ILMN_1744268	ENSG00000178209	plectin
PLEKHA1	ILMN_1662839	ENSG00000107679	pleckstrin homology domain containing A1
PLEKHG4	ILMN_1736242	ENSG00000196155	pleckstrin homology and RhoGEF domain containing G4
PLPP6	ILMN_1802628	ENSG00000205808	phospholipid phosphatase 6
PMP22	ILMN_1785646	ENSG00000109099	peripheral myelin protein 22
PNMT	ILMN_1710027	ENSG00000141744	phenylethanolamine N-methyltransferase
POGLUT2	ILMN_1712505	ENSG00000134901	protein O-glucosyltransferase 2
POGLUT3	ILMN_1651557	ENSG00000178202	protein O-glucosyltransferase 3
POLA2	ILMN_1696713	ENSG00000014138	DNA polymerase alpha 2, accessory subunit
PORCN	ILMN_2337058	ENSG00000102312	porcupine O-acyltransferase
PPIL1	ILMN_2054392	ENSG00000137168	peptidylprolyl isomerase like 1
PPIL2	ILMN_1729690	ENSG00000100023	peptidylprolyl isomerase like 2
PPIP5K1	ILMN_2333766	ENSG00000168781	diphosphoinositol pentakisphosphate kinase 1
PPP1R14B	ILMN_1659888	ENSG00000173457	protein phosphatase 1 regulatory inhibitor subunit 14B
PRDX5	ILMN_1815024	ENSG00000126432	peroxiredoxin 5
PRELID2	ILMN_1668986	ENSG00000186314	PRELI domain containing 2
PRKAB1	ILMN_1793522	ENSG00000111725	protein kinase AMP-activated non-catalytic subunit beta 1
PRKCA	ILMN_1771800	ENSG00000154229	protein kinase C alpha
PRKCH	ILMN_1780898	ENSG00000027075	protein kinase C eta
PRKAA1	ILMN_1783889	ENSG00000132356	protein kinase AMP-activated catalytic subunit alpha 1
PRPF3	ILMN_1715392	ENSG00000117360	pre-mRNA processing factor 3
PRPH	ILMN_1723678	ENSG00000135406	peripherin
PRRX2	ILMN_1790338	ENSG00000167157	paired related homeobox 2
PRSS22	ILMN_1776925	ENSG00000005001	serine protease 22
PRUNE2	ILMN_1810628	ENSG00000106772	prune homolog 2 with BCH domain
PSMA4	ILMN_2198376	ENSG00000041357	proteasome 20S subunit alpha 4
PSME1	ILMN_1806017	ENSG00000092010	proteasome activator subunit 1
PTCRA	ILMN_2091920	ENSG00000171611	pre T cell antigen receptor alpha
PTGFR	ILMN_1813341	ENSG00000122420	prostaglandin F receptor
PTGFR	ILMN_2395652	ENSG00000122420	prostaglandin F receptor
PTMS	ILMN_1721046	ENSG00000159335	parathymosin
PTP4A3	ILMN_2359710	ENSG00000184489	protein tyrosine phosphatase 4A3
PTPRB	ILMN_1672102	ENSG00000127329	protein tyrosine phosphatase receptor type B
PTPRD	ILMN_2315789	ENSG00000153707	protein tyrosine phosphatase receptor type D
PTPRN2	ILMN_1728844	ENSG00000155093	protein tyrosine phosphatase receptor type N2
PTPRR	ILMN_1679051	ENSG00000153233	protein tyrosine phosphatase receptor type R
PYCARD	ILMN_1698766	ENSG00000103490	PYD and CARD domain containing
PYCR1	ILMN_2395092	ENSG00000183010	pyrroline-5-carboxylate reductase 1
PYHIN1	ILMN_1742026	ENSG00000163564	pyrin and HIN domain family member 1
PYHIN1	ILMN_1669447	ENSG00000163564	pyrin and HIN domain family member 1
RAB22A	ILMN_1786976	ENSG00000124209	RAB22A, member RAS oncogene family
RAB34	ILMN_1810486	ENSG00000109113	RAB34, member RAS oncogene family
RAB5B	ILMN_1752582	ENSG00000111540	RAB5B, member RAS oncogene family
RAB8A	ILMN_1760858	ENSG00000167461	RAB8A, member RAS oncogene family
RAD51B	ILMN_1802392	ENSG00000182185	RAD51 paralog B
RAI14	ILMN_1682139	ENSG00000039560	retinoic acid induced 14
RALGPS1	ILMN_1674135	ENSG00000136828	Ral GEF with PH domain and SH3 binding motif 1
RALY	ILMN_2403994	ENSG00000125970	RALY heterogeneous nuclear ribonucleoprotein
RANBP10	ILMN_1667306	ENSG00000141084	RAN binding protein 10
RAP2B	ILMN_2229839	ENSG00000181467	RAP2B, member of RAS oncogene family
RASA1	ILMN_1725312	ENSG00000145715	RAS p21 protein activator 1
RASA4	ILMN_1694404	ENSG00000105808	RAS p21 protein activator 4
RASA4B	ILMN_1694404	ENSG00000170667	RAS p21 protein activator 4B
RASAL2	ILMN_1813701	ENSG00000075391	RAS protein activator like 2
RASEF	ILMN_1779517	ENSG00000165105	RAS and EF-hand domain containing
RASSF1	ILMN_1734205	ENSG00000068028	Ras association domain family member 1
RBM23	ILMN_2363106	ENSG00000100461	RNA binding motif protein 23
RBM33	ILMN_1747968	ENSG00000184863	RNA binding motif protein 33
RBM39	ILMN_1696935	ENSG00000131051	RNA binding motif protein 39
RBM41	ILMN_2108366	ENSG00000089682	RNA binding motif protein 41
RBM45	ILMN_1680378	ENSG00000155636	RNA binding motif protein 45
RBM5	ILMN_1786893	ENSG00000003756	RNA binding motif protein 5
RBMS2	ILMN_1755411	ENSG00000076067	RNA binding motif single stranded interacting protein 2
RBSN	ILMN_1799890	ENSG00000131381	rabenosyn, RAB effector
RBX1	ILMN_1666670	ENSG00000100387	ring-box 1
RCAN2	ILMN_2120210	ENSG00000172348	regulator of calcineurin 2
RCCD1	ILMN_2409318	ENSG00000166965	RCC1 domain containing 1
RDM1	ILMN_1786361	ENSG00000278023	RAD52 motif containing 1
RECQL4	ILMN_1703092	ENSG00000160957	RecQ like helicase 4
RERG	ILMN_1746359	ENSG00000134533	RAS like estrogen regulated growth inhibitor
RFX5	ILMN_1741200	ENSG00000143390	regulatory factor X5
RFX7	ILMN_1762803	ENSG00000181827	regulatory factor X7
RGS9	ILMN_1754468	ENSG00000108370	regulator of G protein signaling 9
RHO	ILMN_1803871	ENSG00000163914	rhodopsin
RHOA	ILMN_1781290	ENSG00000067560	ras homolog family member A
RIC8A	ILMN_1770733	ENSG00000177963	RIC8 guanine nucleotide exchange factor A
RIPK2	ILMN_1758939	ENSG00000104312	receptor interacting serine/threonine kinase 2
RIPPLY3	ILMN_1709257	ENSG00000183145	ripply transcriptional repressor 3
RN7SL535P	ILMN_2296057	ENSG00000239419	RNA, 7SL, cytoplasmic 535, pseudogene
RNF139	ILMN_1811787	ENSG00000170881	ring finger protein 139
RNU1-125P	ILMN_1778010	ENSG00000252561	RNA, U1 small nuclear 125, pseudogene
RNU6-1132P	ILMN_1801641	ENSG00000239108	RNA, U6 small nuclear 1132, pseudogene
RNU6-343P	ILMN_1755411	ENSG00000201579	RNA, U6 small nuclear 343, pseudogene
RNU6-614P	ILMN_1801641	ENSG00000207097	RNA, U6 small nuclear 614, pseudogene
RNU6-721P	ILMN_1801641	ENSG00000222087	RNA, U6 small nuclear 721, pseudogene
RNU7-1	ILMN_1812191	ENSG00000238923	RNA, U7 small nuclear 1
RPA2	ILMN_1753582	ENSG00000117748	replication protein A2
RPAP2	ILMN_1657754	ENSG00000122484	RNA polymerase II associated protein 2
RPE	ILMN_1791523	ENSG00000197713	ribulose-5-phosphate-3-epimerase
RPL13	ILMN_1709039	ENSG00000167526	ribosomal protein L13
RPS6KA2	ILMN_1702501	ENSG00000071242	ribosomal protein S6 kinase A2
RYR3	ILMN_1796455	ENSG00000198838	ryanodine receptor 3
S100A4	ILMN_1684306	ENSG00000196154	S100 calcium binding protein A4
S1PR3	ILMN_1794672	ENSG00000213694	sphingosine-1-phosphate receptor 3
SAE1	ILMN_1657204	ENSG00000142230	SUMO1 activating enzyme subunit 1
SAGSIN1	ILMN_1717219	ENSG00000286075	salivary gland specific protein SAGSIN1
SAYSD1	ILMN_1716728	ENSG00000112167	SAYSVFN motif domain containing 1
SCARA3	ILMN_1723358	ENSG00000168077	scavenger receptor class A member 3
SCGB1D2	ILMN_1714536	ENSG00000124935	secretoglobin family 1D member 2
SCLY	ILMN_1722742	ENSG00000132330	selenocysteine lyase
SCNN1A	ILMN_1713995	ENSG00000111319	sodium channel epithelial 1 subunit alpha
SCO2	ILMN_1701621	ENSG00000284194	synthesis of cytochrome C oxidase 2
SCRN1	ILMN_1756439	ENSG00000136193	secernin 1
SDF2L1	ILMN_1749213	ENSG00000128228	stromal cell derived factor 2 like 1
SEC23B	ILMN_2366246	ENSG00000101310	SEC23 homolog B, COPII coat complex component
SEC24C	ILMN_1706758	ENSG00000176986	SEC24 homolog C, COPII coat complex component
SEC31A	ILMN_2399896	ENSG00000138674	SEC31 homolog A, COPII coat complex component
SECISBP2	ILMN_1736481	ENSG00000187742	SECIS binding protein 2
SEMA6C	ILMN_1813503	ENSG00000143434	semaphorin 6C
SEMA7A	ILMN_1756312	ENSG00000138623	semaphorin 7A (John Milton Hagen blood group)
SEPHS1	ILMN_2176768	ENSG00000086475	selenophosphate synthetase 1
SERPINE2	ILMN_1655595	ENSG00000135919	serpin family E member 2
SETBP1	ILMN_1720513	ENSG00000152217	SET binding protein 1
SFMBT1	ILMN_1752321	ENSG00000163935	Scm like with four mbt domains 1
SH3PXD2A	ILMN_1743103	ENSG00000107957	SH3 and PX domains 2A
SIRT6	ILMN_1654246	ENSG00000077463	sirtuin 6
SLAMF6	ILMN_2196078	ENSG00000162739	SLAM family member 6
SLC22A10	ILMN_1772557	ENSG00000184999	solute carrier family 22 member 10
SLC22A2	ILMN_2334193	ENSG00000112499	solute carrier family 22 member 2
SLC22A9	ILMN_2232339	ENSG00000149742	solute carrier family 22 member 9
SLC25A39	ILMN_1743911	ENSG00000013306	solute carrier family 25 member 39
SLC25A52	ILMN_2186078	ENSG00000141437	solute carrier family 25 member 52
SLC26A10P	ILMN_1755016	ENSG00000135502	solute carrier family 26 member 10, pseudogene
SLC30A3	ILMN_1805807	ENSG00000115194	solute carrier family 30 member 3
SLC34A1	ILMN_1659991	ENSG00000131183	solute carrier family 34 member 1
SLC35B1	ILMN_1727840	ENSG00000121073	solute carrier family 35 member B1
SLC37A4	ILMN_1678678	ENSG00000137700	solute carrier family 37 member 4
SLC44A1	ILMN_1700695	ENSG00000070214	solute carrier family 44 member 1
SLC6A1	ILMN_2171588	ENSG00000157103	solute carrier family 6 member 1
SLC7A2	ILMN_1781400	ENSG00000003989	solute carrier family 7 member 2
SLC7A5P1	ILMN_2234515	ENSG00000260727	solute carrier family 7 member 5 pseudogene 1
SLC7A5P2	ILMN_2234515	ENSG00000258186	solute carrier family 7 member 5 pseudogene 2
SLF2	ILMN_1710207	ENSG00000119906	SMC5-SMC6 complex localization factor 2
SLITRK2	ILMN_1684016	ENSG00000185985	SLIT and NTRK like family member 2
SMAGP	ILMN_2380243	ENSG00000170545	small cell adhesion glycoprotein
SMARCC2	ILMN_1791770	ENSG00000139613	SWI/SNF related, matrix associated, actin dependent regulator of chromatin subfamily c member 2
SNAP25	ILMN_2408080	ENSG00000132639	synaptosome associated protein 25
SNCA	ILMN_1766165	ENSG00000145335	synuclein alpha
SNCA	ILMN_1701933	ENSG00000145335	synuclein alpha
SND1	ILMN_1655961	ENSG00000197157	staphylococcal nuclease and tudor domain containing 1
SND1-IT1	ILMN_1655961	ENSG00000279078	SND1 intronic transcript 1
SNHG14	ILMN_2107655	ENSG00000224078	small nucleolar RNA host gene 14
SNORA51	ILMN_2209515	ENSG00000271798	small nucleolar RNA, H/ACA box 51
SNORD116-2	ILMN_2107655	ENSG00000207001	small nucleolar RNA, C/D box 116-2
SNORD116-6	ILMN_2107655	ENSG00000207442	small nucleolar RNA, C/D box 116-6
SNORD14C	ILMN_1686367	ENSG00000202252	small nucleolar RNA, C/D box 14C
SNORD14D	ILMN_1686367	ENSG00000207118	small nucleolar RNA, C/D box 14D
SNORD14E	ILMN_1686367	ENSG00000200879	small nucleolar RNA, C/D box 14E
SNORD56	ILMN_2209515	ENSG00000229686	small nucleolar RNA, C/D box 56
SNORD86	ILMN_2209515	ENSG00000212498	small nucleolar RNA, C/D box 86
SNUPN	ILMN_1733932	ENSG00000169371	snurportin 1
SNX5	ILMN_1709772	ENSG00000089006	sorting nexin 5
SOCS5	ILMN_2350970	ENSG00000171150	suppressor of cytokine signaling 5
SOCS7	ILMN_1753683	ENSG00000274211	suppressor of cytokine signaling 7
SON	ILMN_2247664	ENSG00000159140	SON DNA and RNA binding protein
SORBS2	ILMN_2407879	ENSG00000154556	sorbin and SH3 domain containing 2
SORBS3	ILMN_1789338	ENSG00000120896	sorbin and SH3 domain containing 3
SOX30	ILMN_1702430	ENSG00000039600	SRY-box transcription factor 30
SP4	ILMN_2145997	ENSG00000105866	Sp4 transcription factor
SPAG16	ILMN_1742135	ENSG00000144451	sperm associated antigen 16
SPAG8	ILMN_2354222	ENSG00000137098	sperm associated antigen 8
SPESP1	ILMN_2231906	ENSG00000258484	sperm equatorial segment protein 1
SPG7	ILMN_1709039	ENSG00000197912	SPG7 matrix AAA peptidase subunit, paraplegin
SPG7	ILMN_1754529	ENSG00000197912	SPG7 matrix AAA peptidase subunit, paraplegin
SPIC	ILMN_2191940	ENSG00000166211	Spi-C transcription factor
SPIN4	ILMN_1684563	ENSG00000186767	spindlin family member 4
STMN1	ILMN_1745593	ENSG00000117632	stathmin 1
STT3A	ILMN_1746090	ENSG00000134910	STT3 oligosaccharyltransferase complex catalytic subunit A
SUCLG2	ILMN_1652379	ENSG00000172340	succinate-CoA ligase GDP-forming subunit beta
SUGP2	ILMN_1689007	ENSG00000064607	SURP and G-patch domain containing 2
SUGP2	ILMN_1711270	ENSG00000064607	SURP and G-patch domain containing 2
SULT1A1	ILMN_1716367	ENSG00000196502	sulfotransferase family 1A member 1
SULT1A2	ILMN_1716367	ENSG00000197165	sulfotransferase family 1A member 2
SV2C	ILMN_1724352	ENSG00000122012	synaptic vesicle glycoprotein 2C
SYMPK	ILMN_1802089	ENSG00000125755	symplekin scaffold protein
SYN3	ILMN_2282019	ENSG00000185666	synapsin III
TAF1	ILMN_2346358	ENSG00000147133	TATA-box binding protein associated factor 1
TAF7L	ILMN_1755638	ENSG00000102387	TATA-box binding protein associated factor 7 like
TAFAZZIN	ILMN_2358733	ENSG00000102125	tafazzin, phospholipid-lysophospholipid transacylase
TAPBP	ILMN_1742450	ENSG00000231925	TAP binding protein
TARBP2	ILMN_2310253	ENSG00000139546	TARBP2 subunit of RISC loading complex
TAS2R14	ILMN_1801349	ENSG00000212127	taste 2 receptor member 14
TBC1D26	ILMN_1707741	ENSG00000214946	TBC1 domain family member 26
TBC1D3B	ILMN_2167397	ENSG00000274808	TBC1 domain family member 3B
TBC1D3F	ILMN_2167397	ENSG00000275954	TBC1 domain family member 3F
TBC1D3P2	ILMN_2167397	ENSG00000290800	TBC1 domain family member 3 pseudogene 2
TBC1D7	ILMN_1661622	ENSG00000145979	TBC1 domain family member 7
TBCD	ILMN_1795400	ENSG00000141556	tubulin folding cofactor D
TBP	ILMN_1697117	ENSG00000112592	TATA-box binding protein
TBX4	ILMN_1745827	ENSG00000121075	T-box transcription factor 4
TBXA2R	ILMN_1794840	ENSG00000006638	thromboxane A2 receptor
TCERG1L	ILMN_1809095	ENSG00000176769	transcription elongation regulator 1 like
TCF20	ILMN_2368068	ENSG00000100207	transcription factor 20
TCF7L1	ILMN_1733841	ENSG00000152284	transcription factor 7 like 1
TCTN3	ILMN_1795563	ENSG00000119977	tectonic family member 3
TDRD6	ILMN_1660261	ENSG00000180113	tudor domain containing 6
TENT5C	ILMN_1713266	ENSG00000183508	terminal nucleotidyltransferase 5C
TEP1	ILMN_1770682	ENSG00000129566	telomerase associated protein 1
TFB1M	ILMN_1733562	ENSG00000029639	transcription factor B1, mitochondrial
THYN1	ILMN_1740345	ENSG00000151500	thymocyte nuclear protein 1
TJAP1	ILMN_1743763	ENSG00000137221	tight junction associated protein 1
TLK1	ILMN_1811029	ENSG00000198586	tousled like kinase 1
TLR7	ILMN_1677827	ENSG00000196664	toll like receptor 7
TM7SF3	ILMN_1803995	ENSG00000064115	transmembrane 7 superfamily member 3
TMEFF2	ILMN_1730645	ENSG00000144339	transmembrane protein with EGF like and two follistatin like domains 2
TMEM119	ILMN_1738116	ENSG00000183160	transmembrane protein 119
TMEM39B	ILMN_2212714	ENSG00000121775	transmembrane protein 39B
TMPRSS6	ILMN_1725014	ENSG00000187045	transmembrane serine protease 6
TNF	ILMN_1728106	ENSG00000232810	tumor necrosis factor
TNFAIP2	ILMN_1727689	ENSG00000185215	TNF alpha induced protein 2
TNFRSF18	ILMN_1743100	ENSG00000186891	TNF receptor superfamily member 18
TNNC1	ILMN_1809842	ENSG00000114854	troponin C1, slow skeletal and cardiac type
TOMM40L	ILMN_2065606	ENSG00000158882	translocase of outer mitochondrial membrane 40 like
TP53	ILMN_1779356	ENSG00000141510	tumor protein p53
TPGS1	ILMN_2199298	ENSG00000141933	tubulin polyglutamylase complex subunit 1
TPM2	ILMN_1757604	ENSG00000198467	tropomyosin 2
TPM2	ILMN_1789196	ENSG00000198467	tropomyosin 2
TPR	ILMN_1730999	ENSG00000047410	translocated promoter region, nuclear basket protein
TRAK1	ILMN_2399174	ENSG00000182606	trafficking kinesin protein 1
TRAK2	ILMN_1781691	ENSG00000115993	trafficking kinesin protein 2
TRAPPC2L	ILMN_1747058	ENSG00000167515	trafficking protein particle complex subunit 2L
TRIM25	ILMN_1813625	ENSG00000121060	tripartite motif containing 25
TRIM36	ILMN_1724350	ENSG00000152503	tripartite motif containing 36
TRIM38	ILMN_1697971	ENSG00000112343	tripartite motif containing 38
TRIM39	ILMN_2413517	ENSG00000204599	tripartite motif containing 39
TRIM43	ILMN_1784230	ENSG00000144015	tripartite motif containing 43
TRIM69	ILMN_1813430	ENSG00000185880	tripartite motif containing 69
TRIM72	ILMN_1720717	ENSG00000177238	tripartite motif containing 72
TRNAU1AP	ILMN_1732722	ENSG00000180098	tRNA selenocysteine 1 associated protein 1
TRO	ILMN_2409642	ENSG00000067445	trophinin
TRO	ILMN_2295518	ENSG00000067445	trophinin
TRPC4AP	ILMN_2402806	ENSG00000100991	transient receptor potential cation channel subfamily C member 4 associated protein
TRPV1	ILMN_1813568	ENSG00000196689	transient receptor potential cation channel subfamily V member 1
TSGA10	ILMN_1674645	ENSG00000135951	testis specific 10
TSR1	ILMN_2092232	ENSG00000167721	TSR1 ribosome maturation factor
TTC21A	ILMN_1715332	ENSG00000168026	tetratricopeptide repeat domain 21A
TTC31	ILMN_1696375	ENSG00000115282	tetratricopeptide repeat domain 31
TTC5	ILMN_1706455	ENSG00000136319	tetratricopeptide repeat domain 5
TTL	ILMN_1764043	ENSG00000114999	tubulin tyrosine ligase
TTLL2	ILMN_2201905	ENSG00000120440	tubulin tyrosine ligase like 2
TUBA1B	ILMN_1800261	ENSG00000123416	tubulin alpha 1b
TUBB	ILMN_2101885	ENSG00000196230	tubulin beta class I
U6	ILMN_1801641	ENSG00000276183	U6 spliceosomal RNA
UBAC1	ILMN_1807044	ENSG00000130560	UBA domain containing 1
UBE2F-SCLY	ILMN_1722742	ENSG00000258984	UBE2F-SCLY readthrough (NMD candidate)
UBE2Q2P13	ILMN_2320480	ENSG00000290760	UBE2Q2 pseudogene 13
UBE2T	ILMN_1711470	ENSG00000077152	ubiquitin conjugating enzyme E2 T
UCKL1	ILMN_2050255	ENSG00000198276	uridine-cytidine kinase 1 like 1
UQCC2	ILMN_1790461	ENSG00000137288	ubiquinol-cytochrome c reductase complex assembly factor 2
UQCR11	ILMN_1745049	ENSG00000127540	ubiquinol-cytochrome c reductase, complex III subunit XI
USP20	ILMN_1771642	ENSG00000136878	ubiquitin specific peptidase 20
USP29	ILMN_1682795	ENSG00000131864	ubiquitin specific peptidase 29
USP37	ILMN_1686319	ENSG00000135913	ubiquitin specific peptidase 37
USP48	ILMN_2285141	ENSG00000090686	ubiquitin specific peptidase 48
USP5	ILMN_1671494	ENSG00000111667	ubiquitin specific peptidase 5
USP54	ILMN_1738971	ENSG00000166348	ubiquitin specific peptidase 54
UVSSA	ILMN_2140700	ENSG00000163945	UV stimulated scaffold protein A
VASH2	ILMN_1692698	ENSG00000143494	vasohibin 2
VCX	ILMN_1684886	ENSG00000182583	variable charge X-linked
VCX	ILMN_2378845	ENSG00000182583	variable charge X-linked
VCX2	ILMN_2378845	ENSG00000177504	variable charge X-linked 2
VCX3A	ILMN_2378845	ENSG00000169059	variable charge X-linked 3A
VILL	ILMN_1778650	ENSG00000136059	villin like
VOPP1	ILMN_2226955	ENSG00000154978	VOPP1 WW domain binding protein
VPS13A	ILMN_2414826	ENSG00000197969	vacuolar protein sorting 13 homolog A
VPS13D	ILMN_1656840	ENSG00000048707	vacuolar protein sorting 13 homolog D
VPS26C	ILMN_1717099	ENSG00000157538	VPS26 endosomal protein sorting factor C
VPS35	ILMN_1761721	ENSG00000069329	VPS35 retromer complex component
WDR1	ILMN_1780036	ENSG00000071127	WD repeat domain 1
WDR1	ILMN_1675844	ENSG00000071127	WD repeat domain 1
WDR48	ILMN_1762103	ENSG00000114742	WD repeat domain 48
WT1	ILMN_2366967	ENSG00000184937	WT1 transcription factor
YJEFN3	ILMN_1658679	ENSG00000250067	YjeF N-terminal domain containing 3
YJU2B	ILMN_1758633	ENSG00000104957	YJU2 splicing factor homolog B
YTHDC1	ILMN_1670878	ENSG00000083896	YTH N6-methyladenosine RNA binding protein C1
YWHAB	ILMN_1694385	ENSG00000166913	tyrosine 3-monooxygenase/tryptophan 5-monooxygenase activation protein beta
ZBED2	ILMN_1651365	ENSG00000177494	zinc finger BED-type containing 2
ZBTB10	ILMN_1673222	ENSG00000205189	zinc finger and BTB domain containing 10
ZCCHC17	ILMN_1761844	ENSG00000121766	zinc finger CCHC-type containing 17
ZDHHC14	ILMN_2309926	ENSG00000175048	zinc finger DHHC-type palmitoyltransferase 14
ZDHHC8	ILMN_1789492	ENSG00000099904	zinc finger DHHC-type palmitoyltransferase 8
ZFAND2B	ILMN_1653718	ENSG00000158552	zinc finger AN1-type containing 2B
ZFP30	ILMN_1742976	ENSG00000120784	ZFP30 zinc finger protein
ZMYM1	ILMN_1702763	ENSG00000197056	zinc finger MYM-type containing 1
ZMYM3	ILMN_2244004	ENSG00000147130	zinc finger MYM-type containing 3
ZNF10	ILMN_1763208	ENSG00000256223	zinc finger protein 10
ZNF114	ILMN_2164290	ENSG00000178150	zinc finger protein 114
ZNF133	ILMN_2174081	ENSG00000125846	zinc finger protein 133
ZNF141	ILMN_1694203	ENSG00000131127	zinc finger protein 141
ZNF236	ILMN_1790918	ENSG00000130856	zinc finger protein 236
ZNF248	ILMN_1662192	ENSG00000198105	zinc finger protein 248
ZNF250	ILMN_1757230	ENSG00000196150	zinc finger protein 250
ZNF280C	ILMN_2061310	ENSG00000056277	zinc finger protein 280C
ZNF286A-TBC1D26	ILMN_1707741	ENSG00000255104	ZNF286A-TBC1D26 readthrough (NMD candidate)
ZNF287	ILMN_1693597	ENSG00000141040	zinc finger protein 287
ZNF30	ILMN_1728230	ENSG00000168661	zinc finger protein 30
ZNF329	ILMN_1689059	ENSG00000181894	zinc finger protein 329
ZNF333	ILMN_2209299	ENSG00000160961	zinc finger protein 333
ZNF337	ILMN_1663160	ENSG00000130684	zinc finger protein 337
ZNF419	ILMN_1680693	ENSG00000105136	zinc finger protein 419
ZNF423	ILMN_2154950	ENSG00000102935	zinc finger protein 423
ZNF451	ILMN_1753567	ENSG00000112200	zinc finger protein 451
ZNF462	ILMN_1686679	ENSG00000148143	zinc finger protein 462
ZNF512	ILMN_1730824	ENSG00000243943	zinc finger protein 512
ZNF540	ILMN_1681846	ENSG00000171817	zinc finger protein 540
ZNF585A	ILMN_1737211	ENSG00000196967	zinc finger protein 585A
ZNF585B	ILMN_2178775	ENSG00000245680	zinc finger protein 585B
ZNF606	ILMN_1681829	ENSG00000166704	zinc finger protein 606
ZNF613	ILMN_1671895	ENSG00000176024	zinc finger protein 613
ZNF616	ILMN_1719219	ENSG00000204611	zinc finger protein 616
ZNF671	ILMN_1713454	ENSG00000083814	zinc finger protein 671
ZNF684	ILMN_1751393	ENSG00000117010	zinc finger protein 684
ZNF688	ILMN_1812877	ENSG00000229809	zinc finger protein 688
ZNF700	ILMN_2068435	ENSG00000196757	zinc finger protein 700
ZNF74	ILMN_2383871	ENSG00000185252	zinc finger protein 74
ZNF789	ILMN_1797853	ENSG00000198556	zinc finger protein 789
ZNF805	ILMN_2225348	ENSG00000204524	zinc finger protein 805
ZNF831	ILMN_1658016	ENSG00000124203	zinc finger protein 831
ZSCAN31	ILMN_1655748	ENSG00000235109	zinc finger and SCAN domain containing 31
ZSWIM3	ILMN_2283196	ENSG00000132801	zinc finger SWIM-type containing 3
ZSWIM8	ILMN_1669433	ENSG00000214655	zinc finger SWIM-type containing 8
ZWILCH	ILMN_1700378	ENSG00000174442	zwilch kinetochore protein
ZWILCH	ILMN_2374633	ENSG00000174442	zwilch kinetochore protein
AARS1	ILMN_1662364	ENSG00000090861	alanyl-tRNA synthetase 1
	ILMN_1811787	ENSG00000253106	novel transcript, antisense to TATDN1
	ILMN_1786771	ENSG00000293149	novel transcript
	ILMN_1675258	ENSG00000284627	RNA binding protein, fox-1 homolog 1 (RBFOX1) pseudogene
	ILMN_1675258	ENSG00000284687	RNA binding protein, fox-1 homolog (C. elegans) 1 (RBFOX1) pseudogene
	ILMN_2083578	ENSG00000283251	novel pseudogene
	ILMN_2083578	ENSG00000283663	novel transcript
	ILMN_1676984	ENSG00000285133	novel protein
	ILMN_1716367	ENSG00000293550	novel transcript
	ILMN_1658679	ENSG00000258674	novel protein
	ILMN_1801641	ENSG00000290522	novel transcript
	ILMN_1801641	ENSG00000290568	novel transcript
	ILMN_1801641	ENSG00000215512	ankyrin repeat domain 30A (ANKRD30A) pseudogene
	ILMN_1801641	ENSG00000268486	ankyrin repeat domain 30B (ANKRD30B) pseudogene
	ILMN_1801641	ENSG00000290438	novel transcript
	ILMN_2225348	ENSG00000268713	novel transcript
	ILMN_2090351	ENSG00000285764	novel transcript
	ILMN_1674337	ENSG00000286264	novel protein
	ILMN_1757147	ENSG00000291024	novel transcript
	ILMN_1798602	ENSG00000254676	novel transcript, sense overlapping PCF11
	ILMN_1656045	ENSG00000260729	novel protein
	ILMN_2247664	ENSG00000231700	pseudogene similar to part of SON DNA binding protein (SON)
	ILMN_1716547	ENSG00000233870	pseudogene similar to part of N-acetylglucosamine kinase (NAGK)
	ILMN_1694404	ENSG00000205236	novel protein, UPK3BL-RASA4 readthrough
	ILMN_1709775	ENSG00000144785	novel protein
	ILMN_1755016	ENSG00000287908	novel protein
	ILMN_1755016	ENSG00000293429	novel transcript
	ILMN_2320480	ENSG00000259363	novel transcript
	ILMN_1706958	ENSG00000212517	None
	ILMN_2068435	ENSG00000267179	novel protein
	ILMN_1761721	ENSG00000261131	novel transcript
	ILMN_1733932	ENSG00000260269	novel transcript
	ILMN_1677018	ENSG00000273433	novel transcript

## Sheet: Unique Genes
ABCC13
ABCC2
ACAP1
ACSL5
ACSS1
ACTA1
ACTA2
ACTBL2
ACTL6A
ACVR1B
ACVR2A
ADAM23
ADAM28
ADAMTS7
ADAMTSL2
ADARB1
ADCY1
ADCY3
ADCY6
ADGRF1
ADGRF4
ADGRL3
ADORA1
ADPRHL1
AFAP1
AFAP1L2
AGBL4
AGBL5
AKR1A1
ALDH3A1
ALG8
ALS2CL
AMACR
AMELY
AMFR
AMMECR1
AMPD3
ANAPC5
ANKDD1A
ANKHD1-EIF4EBP3
ANKRD16
ANKRD30BL
ANKRD30BP2
ANKRD36
ANKRD36C
ANO9
AP1S1
AP2B1
AP4E1
APEX1
APRT
ARF5
ARL3
ARL9
ARMC7
ARTN
ASB6
ASTN2
ATP5F1D
ATP5IF1
ATP6V1G2-DDX39B
AVIL
AZIN1
B3GALT6
B3GAT2
B3GLCT
B4GALT4
BCDIN3D
BCL2L12
BCOR
BDH2
BFSP1
BLM
BOC
BRD4
BSCL2
BTN2A1
BUB1B
BUB1B-PAK6
C12orf57
C17orf58
C1orf35
C1QTNF3-AMACR
C1QTNF5
C3orf70
C7orf50
CACNA1H
CACNA1I
CACNB2
CALCA
CALCOCO2
CAMK1D
CAPN10
CARD19
CASP2
CAST
CASZ1
CBLN2
CBR4
CBX6
CCDC115
CCDC136
CCDC149
CCDC167
CCDC66
CCDC77
CCL19
CCL21
CCNB2
CD3D
CD40
CD47
CDAN1
CDC25B
CDC42EP5
CDH3
CDK18
CDK5RAP1
CDS1
CELF6
CEMIP
CENPF
CENPX
CEP135
CEP15
CEP170B
CEP44
CERS3
CFAP20DC
CFAP65
CGB7
CHD4
CHRNA10
CHRNG
CIAO1
CKLF-CMTM1
CLASRP
CLCN6
CLDN10
CLEC4GP1
CLK2
CLPSL2
CMTM1
CNOT6
CNTN1
CNTNAP1
CNTNAP2
CNTRL
COA3
COG5
COL4A5
COL4A6
COLGALT2
COMMD3
COPS7A
COPZ1
COQ3
CPSF6
CREB5
CRELD2
CRTAC1
CS
CSRP1
CTPS2
CUTA
CXCL10
CYB561
CYFIP2
CYP19A1
CYP8B1
CYTIP
DACT1
DACT3
DAD1
DCAF12
DCAF7
DDIT3
DDX39B
DEFA4
DEFB105A
DEFB105B
DENND2B
DENND6B
DGUOK
DHCR7
DIDO1
DIP2A
DISC1
DKK3
DMAC1
DMBT1
DNAH1
DNAJC12
DOCK9
DOP1A
DPRX
DPYSL2
DRAM1
DSCAML1
DSE
DTX2P1-UPK3BP1-PMS2P11
DTX3
DUT
DXO
DYNC1H1
E2F2
EARS2
EBF2
ECPAS
ECRG4
EFS
EI24
ENDOG
ENO2
ENO3
ENTREP1
EOMES
EPHA1
EPHB3
EPM2AIP1
EPRS1
ERCC2
ETV5
EXOSC10
EZH2
FABP6
FAM124A
FAM13C
FAM167A
FAM220A
FAM220CP
FAM24A
FBLIM1
FBXO9
FBXW11
FEZ1
FGD5
FGF12
FGF18
FGF4
FGF7
FIBP
FKBP1B
FKBP2
FKTN
FLNB
FMNL3
FNBP1
FNDC5
FPGS
FRA10AC1
FSCN2
FSCN3
FTMT
FUT4
FXN
FXYD2
FYN
FZD2
G2E3
GABBR1
GAL3ST4
GALK1
GALNT10
GAS2L1
GATA3
GCHFR
GDPGP1
GEMIN8
GFRA4
GGTA1
GID8
GIGYF2
GINS2
GIPC1
GJC2
GLCE
GLIS2
GLYATL1
GMPPA
GMPPB
GNB1
GOLGA3
GOSR2
GPM6A
GPR161
GPR39
GPRIN2
GPSM2
GRHL3
GRIA3
GRIA4
GRIK1
GRIPAP1
GRM2
GTF2A1
GTPBP3
GUCY1A1
GUK1
GYG1
GYPC
HAND2
HBD
HCRTR2
HDAC3
HDGFL2
HELQ
HEPH
HERC1
HEY2
HEYL
HGF
HMOX2
HNRNPUL1
HOMER3
HOPX
HOXA2
HOXA4
HOXB7
HOXD1
HRNR
HS3ST4
HS6ST2
HSD11B2
HSD17B2
HSF2
HSPA2
HSPA5
HSPA8
HTR3A
ICA1
ICAM4
ID3
IDH3G
IER5L
IFIT1B
IFNA10
IFNA17
IFNA4
IFRD1
IGSF3
IL32
ILK
IP6K1
IP6K2
IPO13
IPO9
IQCB1
IRAG1
IRAK1
ITGAV
ITGB3BP
ITPR1
ITPR3
JAG1
JMJD6
JMJD7-PLA2G4B
JPH1
KAT2A
KAZALD1
KBTBD12
KCNA5
KCNG1
KCNH1
KCNH8
KCNJ16
KCNK17
KCNMB1
KIF17
KIF20B
KIF2C
KIF3A
KIF5C
KIRREL2
KIAA1143
KIAA1143P1
KLF13
KLK15
KMT2A
KMT2E
KRT222
KRTAP4-7
KRTAP5-2
LAGE3
LARGE1
LBH
LCE3A
LCMT1
LGALS8
LGI1
LINGO1
LRRC17
LRRC20
LRRC37A6P
LRRC37A9P
LRRC45
LRRC74B
LRRN4CL
LSAMP
LTO1
MAGEA6
MAGEB4
MAGED2
MAGEE2
MAMLD1
MAP4K1
MAPK11
MAPKBP1
MARCHF4
MARCHF8
MARS2
MARVELD2
MB
MBD1
MDC1
MED12
MED17
MED29
MEG8
MEOX1
METTL13
METTL16
MEX3D
MFRP
MFSD2B
MGAT4B
MICAL2
MICOS13
MIPEP
MIPOL1
MIR1229
MIR1914
MIR646HG
MIR661
MIR6822
MIR6881
MIR7704
MIR99AHG
MKNK1
MLC1
MLH3
MLLT11
MMRN1
MMS19
MOCOS
MOXD1
MRE11
MRPL24
MSMO1
MSX2P1
MTHFD1L
MTHFR
MTMR11
MTMR4
MTUS1
MUC1
MYH11
MYH9
MYL9
MYO18A
MYO1C
MYO9A
MYOM3
MYOZ3
NABP2
NACA
NAGK
NAT1
NCALD
NCDN
NCKAP5
NDUFB7
NECAP2
NEFM
NES
NFKB2
NHERF2
NKX2-2
NMUR1
NOP56
NPAS2
NPNT
NPRL2
NPTN
NR2F2
NRF1
NRSN2
NRXN1
NRXN2
NTNG1
NUP133
NUP205
NUP62
NXPE3
NAALADL1
OCIAD2
ODAPH
OLFML2A
OR2A1
OR2A12
OR2A14
OR2A42
OR4D1
OR5AC2
OR8B2
ORAI1
ORC4
OSBPL2
OSBPL5
OSGEP
P4HA2
PABPC1L2A
PAFAH1B3
PAGE5
PAN2
PAXX
PCDHA9
PCDHB13
PCDHGA1
PCDHGA10
PCDHGA11
PCDHGA12
PCDHGA2
PCDHGA3
PCDHGA4
PCDHGA5
PCDHGA6
PCDHGA7
PCDHGA8
PCDHGA9
PCDHGB1
PCDHGB2
PCDHGB3
PCDHGB4
PCDHGB5
PCDHGB6
PCDHGB7
PCDHGC3
PCDHGC4
PCDHGC5
PCF11
PCGF2
PCNA
PCSK1
PDE4D
PDE5A
PDE6A
PDGFRB
PDIK1L
PEAK3
PFAS
PGBD1
PGLS
PHF1
PI4KA
PIBF1
PIGU
PITHD1
PLA1A
PLA2G4B
PLA2G4C
PLA2R1
PLCB4
PLEC
PLEKHA1
PLEKHG4
PLPP6
PMP22
PNMT
POGLUT2
POGLUT3
POLA2
PORCN
PPIL1
PPIL2
PPIP5K1
PPP1R14B
PRDX5
PRELID2
PRKAB1
PRKCA
PRKCH
PRKAA1
PRPF3
PRPH
PRRX2
PRSS22
PRUNE2
PSMA4
PSME1
PTCRA
PTGFR
PTMS
PTP4A3
PTPRB
PTPRD
PTPRN2
PTPRR
PYCARD
PYCR1
PYHIN1
RAB22A
RAB34
RAB5B
RAB8A
RAD51B
RAI14
RALGPS1
RALY
RANBP10
RAP2B
RASA1
RASA4
RASA4B
RASAL2
RASEF
RASSF1
RBM23
RBM33
RBM39
RBM41
RBM45
RBM5
RBMS2
RBSN
RBX1
RCAN2
RCCD1
RDM1
RECQL4
RERG
RFX5
RFX7
RGS9
RHO
RHOA
RIC8A
RIPK2
RIPPLY3
RN7SL535P
RNF139
RNU1-125P
RNU6-1132P
RNU6-343P
RNU6-614P
RNU6-721P
RNU7-1
RPA2
RPAP2
RPE
RPL13
RPS6KA2
RYR3
S100A4
S1PR3
SAE1
SAGSIN1
SAYSD1
SCARA3
SCGB1D2
SCLY
SCNN1A
SCO2
SCRN1
SDF2L1
SEC23B
SEC24C
SEC31A
SECISBP2
SEMA6C
SEMA7A
SEPHS1
SERPINE2
SETBP1
SFMBT1
SH3PXD2A
SIRT6
SLAMF6
SLC22A10
SLC22A2
SLC22A9
SLC25A39
SLC25A52
SLC26A10P
SLC30A3
SLC34A1
SLC35B1
SLC37A4
SLC44A1
SLC6A1
SLC7A2
SLC7A5P1
SLC7A5P2
SLF2
SLITRK2
SMAGP
SMARCC2
SNAP25
SNCA
SND1
SND1-IT1
SNHG14
SNORA51
SNORD116-2
SNORD116-6
SNORD14C
SNORD14D
SNORD14E
SNORD56
SNORD86
SNUPN
SNX5
SOCS5
SOCS7
SON
SORBS2
SORBS3
SOX30
SP4
SPAG16
SPAG8
SPESP1
SPG7
SPIC
SPIN4
STMN1
STT3A
SUCLG2
SUGP2
SULT1A1
SULT1A2
SV2C
SYMPK
SYN3
TAF1
TAF7L
TAFAZZIN
TAPBP
TARBP2
TAS2R14
TBC1D26
TBC1D3B
TBC1D3F
TBC1D3P2
TBC1D7
TBCD
TBP
TBX4
TBXA2R
TCERG1L
TCF20
TCF7L1
TCTN3
TDRD6
TENT5C
TEP1
TFB1M
THYN1
TJAP1
TLK1
TLR7
TM7SF3
TMEFF2
TMEM119
TMEM39B
TMPRSS6
TNF
TNFAIP2
TNFRSF18
TNNC1
TOMM40L
TP53
TPGS1
TPM2
TPR
TRAK1
TRAK2
TRAPPC2L
TRIM25
TRIM36
TRIM38
TRIM39
TRIM43
TRIM69
TRIM72
TRNAU1AP
TRO
TRPC4AP
TRPV1
TSGA10
TSR1
TTC21A
TTC31
TTC5
TTL
TTLL2
TUBA1B
TUBB
U6
UBAC1
UBE2F-SCLY
UBE2Q2P13
UBE2T
UCKL1
UQCC2
UQCR11
USP20
USP29
USP37
USP48
USP5
USP54
UVSSA
VASH2
VCX
VCX2
VCX3A
VILL
VOPP1
VPS13A
VPS13D
VPS26C
VPS35
WDR1
WDR48
WT1
YJEFN3
YJU2B
YTHDC1
YWHAB
ZBED2
ZBTB10
ZCCHC17
ZDHHC14
ZDHHC8
ZFAND2B
ZFP30
ZMYM1
ZMYM3
ZNF10
ZNF114
ZNF133
ZNF141
ZNF236
ZNF248
ZNF250
ZNF280C
ZNF286A-TBC1D26
ZNF287
ZNF30
ZNF329
ZNF333
ZNF337
ZNF419
ZNF423
ZNF451
ZNF462
ZNF512
ZNF540
ZNF585A
ZNF585B
ZNF606
ZNF613
ZNF616
ZNF671
ZNF684
ZNF688
ZNF700
ZNF74
ZNF789
ZNF805
ZNF831
ZSCAN31
ZSWIM3
ZSWIM8
ZWILCH
AARS1

## Sheet: Reactome
Term	Overlap	P-value	Adjusted p-value	Odds Ratio	Combined Score	Genes
Smooth Muscle Contraction R-HSA-445355	9/43	8.45535e-05	0.060012	5.82139	54.5938	ACTA2;TRIM72;GUCY1A1;TPM2;MYH11;PDE5A;SORBS3;MYL9;CACNA1H
Neuronal System R-HSA-112316	34/386	9.53328e-05	0.060012	2.15078	19.9122	KCNG1;SNAP25;PRKAA1;SLC22A2;NRXN1;NRXN2;KCNA5;GRIK1;ADCY1;SLC6A1;KIF17;ADCY6;NCALD;CHRNG;SLITRK2;KCNMB1;RPS6KA2;NPTN;HOMER3;GRIA3;KCNH1;GRIA4;HSPA8;KCNH8;KCNJ16;PRKCA;HTR3A;KCNK17;AP2B1;SYN3;PRKAB1;PTPRD;CACNB2;GNB1
Muscle Contraction R-HSA-397014	21/196	0.000148586	0.0623566	2.65626	23.4132	TRIM72;GUCY1A1;NPRL2;TPM2;ITPR1;PRKCA;KCNA5;ITPR3;KCNK17;SORBS3;RYR3;CACNA1H;ACTA2;CACNB2;FXYD2;FKBP1B;ORAI1;MYH11;PDE5A;MYL9;FGF12
EPHA-mediated Growth Cone Collapse R-HSA-3928663	5/15	0.000333159	0.0878105	10.9593	87.7498	MYH9;FYN;MYH11;MYL9;RHOA
Carboxyterminal Post-Translational Modifications Of Tubulin R-HSA-8955332	8/41	0.000348731	0.0878105	5.32552	42.3976	AGBL5;AGBL4;TUBA1B;TTLL2;TUBB;VASH2;TPGS1;TTL
Transmission Across Chemical Synapses R-HSA-112315	23/246	0.000542682	0.113873	2.28258	17.1627	HSPA8;SNAP25;PRKAA1;SLC22A2;KCNJ16;PRKCA;GRIK1;HTR3A;ADCY1;AP2B1;SLC6A1;SYN3;PRKAB1;KIF17;ADCY6;NCALD;CACNB2;CHRNG;RPS6KA2;GNB1;NPTN;GRIA3;GRIA4
Nitric Oxide Stimulates Guanylate Cyclase R-HSA-392154	5/21	0.00181348	0.326168	6.84741	43.2243	GUCY1A1;KCNMB1;IRAG1;ITPR1;PDE5A
Factors Involved In Megakaryocyte Development And Platelet Production R-HSA-983231	14/136	0.00261782	0.351083	2.52658	15.0216	IFNA4;DOCK9;IFNA17;PRKCA;GATA3;HBD;RBSN;RAD51B;KIF5C;KIF3A;KIF2C;KIF20B;TP53;IFNA10
Neurotransmitter Receptors And Postsynaptic Signal Transmission R-HSA-112314	17/182	0.00276026	0.351083	2.27122	13.383	PRKAA1;KCNJ16;PRKCA;GRIK1;HTR3A;ADCY1;AP2B1;PRKAB1;KIF17;ADCY6;NCALD;CHRNG;RPS6KA2;GNB1;NPTN;GRIA3;GRIA4
Nucleotide Salvage R-HSA-8956321	5/23	0.00278859	0.351083	6.08595	35.7989	DGUOK;SCO2;AMPD3;APRT;UCKL1
cGMP Effects R-HSA-418457	4/15	0.0034011	0.389271	7.96085	45.2467	KCNMB1;IRAG1;ITPR1;PDE5A
NOTCH3 Intracellular Domain Regulates Transcription R-HSA-9013508	5/25	0.00409516	0.42965	5.47678	30.1111	PTCRA;HEYL;KAT2A;HEY2;MAMLD1
Trafficking Of GluR2-containing AMPA Receptors R-HSA-416993	4/17	0.00553016	0.472169	6.7354	35.0075	PRKCA;AP2B1;GRIA3;GRIA4
FCGR3A-mediated IL10 Synthesis R-HSA-9664323	6/38	0.00580436	0.472169	4.10972	21.1615	ITPR1;ITPR3;FYN;PRKCA;ADCY1;ADCY6
Ion Homeostasis R-HSA-5578775	7/50	0.00586715	0.472169	3.57017	18.3449	FXYD2;FKBP1B;ITPR1;ORAI1;PRKCA;ITPR3;RYR3
Regulation Of TP53 Activity Thru Phosphorylation R-HSA-6804756	10/90	0.00600056	0.472169	2.74553	14.0459	TAF7L;MAPK11;BLM;PRKAA1;MRE11;TBP;ARTN;PRKAB1;TP53;TAF1
SARS-CoV-2 Activates/Modulates Innate And Adaptive Immune Responses R-HSA-9705671	12/121	0.00688846	0.474931	2.41998	12.0464	IFNA4;NUP205;IRAK1;NUP133;RIPK2;IFNA17;TPR;NUP62;TRIM25;TLR7;SEC24C;IFNA10
Gene Expression (Transcription) R-HSA-74160	83/1449	0.00726228	0.474931	1.35887	6.6925	ZNF133;MDC1;MRE11;ZNF250;YWHAB;PHF1;CHD4;MED17;MED12;TAF7L;ZFP30;ZNF606;PCF11;HEY2;NUP62;CASP2;ZNF248;ZNF688;ZNF684;ZNF287;SMARCC2;TBP;NUP133;TNFRSF18;ACTL6A;ZNF10;PRKCA;PRKAB1;RBX1;KAT2A;PSMA4;DDX39B;SCO2;DDIT3;HAND2;PSME1;ANAPC5;MYL9;TP53;ZNF114;KMT2E;ZNF671;GTF2A1;BLM;PRKAA1;NUP205;PCNA;HDAC3;KMT2A;GATA3;RPAP2;PRDX5;IRAK1;TPR;SYMPK;ZNF700;ZNF585B;ZNF585A;ZNF540;CBX6;TCF7L1;JAG1;CPSF6;PCGF2;BCD…
Metabolism Of Carbohydrates R-HSA-71387	22/285	0.00752845	0.474931	1.8452	9.02128	NUP205;CEMIP;NUP133;GLCE;RPE;B3GAT2;AKR1A1;PRKCA;B3GALT6;ENO2;ENO3;HS3ST4;HS6ST2;FUT4;TPR;DSE;NUP62;PGLS;SLC37A4;GYG1;B4GALT4;GALK1
RHO GTPases Activate ROCKs R-HSA-5627117	4/19	0.00840078	0.474931	5.83673	27.8963	MYH9;MYH11;MYL9;RHOA
RHO GTPases Activate CIT R-HSA-5625900	4/19	0.00840078	0.474931	5.83673	27.8963	MYH9;MYH11;MYL9;RHOA
HCMV Early Events R-HSA-9609690	10/96	0.00936968	0.474931	2.55318	11.924	PCSK1;DYNC1H1;NUP205;DUT;HDAC3;NUP133;KCNH8;NUP62;TPR;EZH2
Cardiac Conduction R-HSA-5576891	12/126	0.0094102	0.474931	2.31323	10.7935	CACNB2;NPRL2;FXYD2;FKBP1B;ITPR1;ORAI1;PRKCA;ITPR3;KCNA5;KCNK17;FGF12;RYR3
NOTCH4 Intracellular Domain Regulates Transcription R-HSA-9013695	4/20	0.0101428	0.474931	5.47165	25.1203	ACTA2;KAT2A;HEY2;MAMLD1
Sema4D Induced Cell Migration And Growth-Cone Collapse R-HSA-416572	4/20	0.0101428	0.474931	5.47165	25.1203	MYH9;MYH11;MYL9;RHOA
Disease R-HSA-1643685	96/1736	0.0103691	0.474931	1.31037	5.98696	CYFIP2;SNAP25;PCSK1;IFNA4;PIGU;WDR48;MRE11;YWHAB;CHD4;ZDHHC8;FGF4;TAF7L;PYCARD;FGF7;HEPH;HEY2;CNTRL;NUP62;ADAMTSL2;MYO18A;TRIM25;AP1S1;LARGE1;SLC37A4;GYG1;ADAMTS7;PDGFRB;GPR39;ALG8;TBP;ABCC2;NUP133;RIPK2;IFNA17;KCNH8;SLC34A1;TUBB;PRKCA;SND1;CDC25B;RBX1;APRT;RAD51B;KAT2A;PSMA4;DAD1;PSME1;MYH9;ANAPC5;TLR7;GEMIN8;TP53;IFNA10;GTF2A1;BLM;CALCA;NUP205;HDAC3;B3GLCT;ITPR1;ITPR3;ADCY1;TRAK1;CYP19A1;ADCY6;…
Activation Of Phototransduction Cascade R-HSA-2485179	3/11	0.0106438	0.474931	8.20152	37.2577	GNB1;RHO;PDE6A
RNA Polymerase II Transcription R-HSA-73857	75/1312	0.0109425	0.474931	1.35217	6.10517	ZNF133;MDC1;MRE11;ZNF250;YWHAB;CHD4;MED17;MED12;TAF7L;ZFP30;ZNF606;PCF11;HEY2;CASP2;ZNF248;ZNF688;ZNF684;ZNF287;SMARCC2;TBP;TNFRSF18;ACTL6A;ZNF10;PRKCA;PRKAB1;RBX1;KAT2A;PSMA4;DDX39B;SCO2;DDIT3;HAND2;PSME1;ANAPC5;MYL9;TP53;ZNF114;KMT2E;ZNF671;GTF2A1;BLM;PRKAA1;PCNA;HDAC3;KMT2A;GATA3;RPAP2;PRDX5;IRAK1;SYMPK;ZNF700;ZNF585B;ZNF585A;ZNF540;CBX6;TCF7L1;JAG1;CPSF6;PCGF2;MAPK11;CNOT6;ZNF419;ARTN;TTC5;ZN…
Citric Acid Cycle (TCA Cycle) R-HSA-71403	4/21	0.0121026	0.474931	5.14952	22.7317	CS;PCDHGA5;IDH3G;SUCLG2
Constitutive Signaling By NOTCH1 HD+PEST Domain Mutants R-HSA-2894862	7/58	0.0130797	0.474931	3.00888	13.0486	HEYL;KAT2A;HDAC3;JAG1;HEY2;MAMLD1;RBX1
Cytosolic Iron-Sulfur Cluster Assembly R-HSA-2564830	3/12	0.013735	0.474931	7.28986	31.2575	ERCC2;MMS19;CIAO1
Acyl Chain Remodelling Of PS R-HSA-1482801	4/22	0.0142892	0.474931	4.86318	20.66	OSBPL5;PLA2G4B;PLA2R1;PLA1A
G2/M Transition R-HSA-69275	15/182	0.0143454	0.474931	1.97521	8.38345	DYNC1H1;CEP135;FBXW11;TUBB;PRKCA;CDC25B;RBX1;CCNB2;CENPF;PSMA4;CNTRL;PSME1;TP53;LCMT1;RAB8A
Generic Transcription Pathway R-HSA-212436	68/1190	0.0150947	0.474931	1.34854	5.65498	ZNF133;MDC1;MRE11;ZNF250;YWHAB;CHD4;MED17;MED12;TAF7L;ZFP30;ZNF606;HEY2;CASP2;ZNF248;ZNF688;ZNF684;ZNF287;SMARCC2;TBP;TNFRSF18;ACTL6A;ZNF10;PRKCA;PRKAB1;RBX1;KAT2A;PSMA4;SCO2;DDIT3;HAND2;PSME1;ANAPC5;MYL9;TP53;ZNF114;KMT2E;ZNF671;BLM;PRKAA1;PCNA;HDAC3;KMT2A;GATA3;PRDX5;IRAK1;ZNF700;ZNF585B;ZNF585A;ZNF540;CBX6;TCF7L1;JAG1;PCGF2;MAPK11;CNOT6;ZNF419;ARTN;TTC5;ZNF616;ZNF30;ZNF74;ERCC2;ZNF613;ZNF337;M…
Activation Of NMDA Receptors And Postsynaptic Events R-HSA-442755	8/74	0.0155328	0.474931	2.65816	11.0707	PRKAA1;RPS6KA2;PRKCA;ADCY1;KIF17;PRKAB1;GRIA3;GRIA4
Signaling By NOTCH1 R-HSA-1980143	8/74	0.0155328	0.474931	2.65816	11.0707	HEYL;KAT2A;HDAC3;JAG1;HEY2;CNTN1;MAMLD1;RBX1
Mitotic G2-G2/M Phases R-HSA-453274	15/184	0.0157113	0.474931	1.95163	8.10586	DYNC1H1;CEP135;FBXW11;TUBB;PRKCA;CDC25B;RBX1;CCNB2;CENPF;PSMA4;CNTRL;PSME1;TP53;LCMT1;RAB8A
PLC Beta Mediated Events R-HSA-112043	6/47	0.0162065	0.474931	3.20607	13.2165	PLCB4;ITPR1;ITPR3;PRKCA;ADCY1;ADCY6
PI-3K cascade:FGFR2 R-HSA-5654695	4/23	0.0167103	0.474931	4.60698	18.8505	PIGU;FGF7;FGF18;FGF4
Ca2+ Pathway R-HSA-4086398	7/61	0.0169661	0.474931	2.84127	11.5826	TCF7L1;FZD2;GNB1;ITPR1;PRKCA;ITPR3;PDE6A
Signaling By FGFR In Disease R-HSA-1226099	7/61	0.0169661	0.474931	2.84127	11.5826	PIGU;FGF7;CPSF6;CNTRL;FGF18;MYO18A;FGF4
Purine Salvage R-HSA-74217	3/13	0.0172823	0.474931	6.56053	26.6231	DGUOK;AMPD3;APRT
Acetylcholine Inhibits Contraction Of Outer Hair Cells R-HSA-9667769	2/5	0.0175808	0.474931	14.5676	58.867	KCNMB1;CHRNA10
RHOT1 GTPase Cycle R-HSA-9013425	2/5	0.0175808	0.474931	14.5676	58.867	TRAK1;TRAK2
Synthesis Of GDP-mannose R-HSA-446205	2/5	0.0175808	0.474931	14.5676	58.867	GMPPB;GMPPA
NOTCH1 Intracellular Domain Regulates Transcription R-HSA-2122947	6/48	0.0178555	0.474931	3.12957	12.5979	HEYL;KAT2A;HDAC3;HEY2;MAMLD1;RBX1
Toll Like Receptor 9 (TLR9) Cascade R-HSA-168138	10/106	0.017966	0.474931	2.28602	9.18814	MAPK11;IRAK1;FBXW11;RIPK2;RPS6KA2;KCNH8;TLR7;TP53;RBSN;NFKB2
Impaired BRCA2 Binding To PALB2 R-HSA-9709603	4/24	0.019373	0.474931	4.3764	17.26	RAD51B;BLM;MRE11;ARTN
Sema4D In Semaphorin Signaling R-HSA-400685	4/24	0.019373	0.474931	4.3764	17.26	MYH9;MYH11;MYL9;RHOA
Nuclear Pore Complex (NPC) Disassembly R-HSA-3301854	5/36	0.0195683	0.474931	3.53137	13.8919	CCNB2;NUP205;NUP133;NUP62;TPR
Signaling By FGFR1 In Disease R-HSA-5655302	5/36	0.0195683	0.474931	3.53137	13.8919	PIGU;CPSF6;CNTRL;MYO18A;FGF4
Signaling By NOTCH3 R-HSA-9012852	6/49	0.0196159	0.474931	3.05663	12.0169	PTCRA;HEYL;KAT2A;JAG1;HEY2;MAMLD1
RUNX3 Regulates NOTCH Signaling R-HSA-8941856	3/14	0.0212912	0.4995	5.9638	22.9574	KAT2A;JAG1;MAMLD1
Semaphorin Interactions R-HSA-373755	7/64	0.0216037	0.4995	2.69131	10.3209	SEMA7A;DPYSL2;MYH9;FYN;MYH11;MYL9;RHOA
NCAM1 Interactions R-HSA-419037	5/37	0.0218333	0.4995	3.42084	13.0824	CACNB2;ARTN;COL4A5;CACNA1H;GFRA4
Defective HDR Thru Homologous Recombination (HRR) Due To BRCA1 Loss-Of-Function R-HSA-9701192	4/25	0.0222831	0.4995	4.16778	15.854	RAD51B;BLM;MRE11;ARTN
Metabolism Of Nucleotides R-HSA-15869	9/95	0.0234861	0.4995	2.29521	8.61013	DGUOK;DUT;GUK1;SCO2;CTPS2;AMPD3;PFAS;APRT;UCKL1
Regulation Of HSF1-mediated Heat Shock Response R-HSA-3371453	8/81	0.0254477	0.4995	2.40238	8.81946	HSPA8;NUP205;NUP133;HSPA5;NUP62;TPR;COL4A6;HSPA2
Signaling By NOTCH4 R-HSA-9013694	8/81	0.0254477	0.4995	2.40238	8.81946	ACTA2;KAT2A;PSMA4;JAG1;HEY2;PSME1;MAMLD1;RBX1
G-protein Mediated Events R-HSA-112040	6/52	0.0255952	0.4995	2.85684	10.4713	PLCB4;ITPR1;PRKCA;ITPR3;ADCY1;ADCY6
Metabolism Of Non-Coding RNA R-HSA-194441	6/52	0.0255952	0.4995	2.85684	10.4713	NUP205;NUP133;NUP62;TPR;GEMIN8;SNUPN
Estrogen Biosynthesis R-HSA-193144	2/6	0.0256106	0.4995	10.9251	40.0379	HSD17B2;CYP19A1
Sensing Of DNA Double Strand Breaks R-HSA-5693548	2/6	0.0256106	0.4995	10.9251	40.0379	MRE11;ARTN
Elevation Of Cytosolic Ca2+ Levels R-HSA-139853	3/15	0.0257638	0.4995	5.46653	20.0009	ITPR1;ORAI1;ITPR3
DAG And IP3 Signaling R-HSA-1489509	5/39	0.0268577	0.4995	3.21927	11.6448	ITPR1;ITPR3;PRKCA;ADCY1;ADCY6
Nuclear Envelope Breakdown R-HSA-2980766	6/53	0.0278302	0.4995	2.79591	10.0139	CCNB2;NUP205;NUP133;NUP62;TPR;PRKCA
Nucleotide-binding Domain, Leucine Rich Repeat Containing NLR Signaling Pathways R-HSA-168643	6/53	0.0278302	0.4995	2.79591	10.0139	PYCARD;MAPK11;IRAK1;RIPK2;CASP2;NFKB2
Resolution Of D-loop Structures Thru Synthesis-Dependent Strand Annealing (SDSA) R-HSA-5693554	4/27	0.0288641	0.4995	3.80497	13.4892	RAD51B;BLM;MRE11;ARTN
Platelet Homeostasis R-HSA-418346	8/83	0.0289442	0.4995	2.33807	8.28236	GUCY1A1;KCNMB1;GNB1;IRAG1;ITPR1;ORAI1;PDE5A;ITPR3
PKA Activation In Glucagon Signaling R-HSA-164378	3/16	0.0306987	0.4995	5.04577	17.5771	PRKCA;ADCY1;ADCY6
Glycolysis R-HSA-70171	7/69	0.031165	0.4995	2.47362	8.57965	NUP205;NUP133;NUP62;TPR;PRKCA;ENO2;ENO3
Cell Cycle R-HSA-1640170	39/654	0.0325051	0.4995	1.40057	4.79885	MDC1;DIDO1;NUP205;BLM;MRE11;PCNA;ZWILCH;YWHAB;BUB1B;ORC4;CCNB2;TUBA1B;TPR;CNTRL;NUP62;E2F2;LCMT1;RAB8A;DYNC1H1;GINS2;CEP135;CENPX;NUP133;FBXW11;TUBB;PRKCA;HSPA2;MLH3;CDC25B;RBX1;CENPF;POLA2;PSMA4;ARTN;PSME1;ANAPC5;KIF2C;TP53;ITGB3BP
Antigen Presentation: Folding, Assembly, Peptide Loading Of Class I MHC R-HSA-983170	4/28	0.0325419	0.4995	3.64624	12.4892	HSPA5;SEC24C;SEC31A;TAPBP
TRAF6 Mediated IRF7 Activation R-HSA-933541	4/28	0.0325419	0.4995	3.64624	12.4892	IFNA4;IFNA17;TRIM25;IFNA10
Hemostasis R-HSA-109582	35/576	0.0327014	0.4995	1.42775	4.88338	IFNA4;SERPINE2;WDR1;GYPC;DOCK9;ITPR1;ITPR3;GATA3;HBD;TBXA2R;KIF5C;KIF3A;KCNMB1;ITGAV;FYN;GUCY1A1;PRKCH;PPIL2;HSPA5;IFNA17;IRAG1;PRKCA;RBSN;RHOA;RAD51B;MMRN1;GNB1;ORAI1;MAGED2;KIF2C;PDE5A;CD47;KIF20B;TP53;IFNA10
TRAF6 Mediated Induction Of NFkB And MAP Kinases Upon TLR7/8 Or 9 Activation R-HSA-975138	9/101	0.0332218	0.4995	2.14485	7.30224	MAPK11;IRAK1;FBXW11;RIPK2;RPS6KA2;KCNH8;TLR7;TP53;NFKB2
Diseases Of Signal Transduction By Growth Factor Receptors And Second Messengers R-HSA-5663202	27/424	0.0342815	0.4995	1.4983	5.05399	PIGU;WDR48;HDAC3;YWHAB;TRAK1;FGF4;FGF7;PORCN;HEY2;TPR;CNTRL;MYO18A;FYN;SEC31A;PDGFRB;JAG1;CPSF6;SND1;RBX1;HEYL;CLCN6;KAT2A;PSMA4;FGF18;PSME1;MYH9;MAMLD1
Organelle Biogenesis And Maintenance R-HSA-1852241	19/275	0.034476	0.4995	1.63203	5.49586	IQCB1;DYNC1H1;CEP135;HDAC3;TUBB;ARL3;PRKCA;MICOS13;NRF1;TFB1M;PRKAB1;KIF17;ATP5F1D;MAPK11;TCTN3;KIF3A;CNTRL;RHO;RAB8A
HDL Assembly R-HSA-8963896	2/7	0.0348247	0.4995	8.73966	29.3428	PRKCA;ZDHHC8
Neurofascin Interactions R-HSA-447043	2/7	0.0348247	0.4995	8.73966	29.3428	CNTNAP1;CNTN1
RHOT2 GTPase Cycle R-HSA-9013419	2/7	0.0348247	0.4995	8.73966	29.3428	TRAK1;TRAK2
MyD88 Dependent Cascade Initiated On Endosome R-HSA-975155	9/102	0.0350798	0.4995	2.12167	7.10789	MAPK11;IRAK1;FBXW11;RIPK2;RPS6KA2;KCNH8;TLR7;TP53;NFKB2
Glucagon-like Peptide-1 (GLP1) Regulates Insulin Secretion R-HSA-381676	5/42	0.0356775	0.4995	2.95779	9.85899	GNB1;ITPR1;ITPR3;PRKCA;ADCY6
Transport Of Mature mRNA Derived From An Intronless Transcript R-HSA-159231	5/42	0.0356775	0.4995	2.95779	9.85899	NUP205;NUP133;NUP62;TPR;SYMPK
SARS-CoV Infections R-HSA-9679506	24/369	0.0358398	0.4995	1.53141	5.09761	IFNA4;NUP205;NUP133;RIPK2;YWHAB;TUBB;IFNA17;CHD4;ZDHHC8;AP2B1;RBX1;IRAK1;DAD1;FXYD2;TPR;NUP62;MGAT4B;STT3A;TRIM25;TLR7;GEMIN8;SEC24C;BRD4;IFNA10
Activated Point Mutants Of FGFR2 R-HSA-2033519	3/17	0.036092	0.4995	4.68511	15.5625	FGF7;FGF18;FGF4
Metabolism Of Folate And Pterines R-HSA-196757	3/17	0.036092	0.4995	4.68511	15.5625	MTHFD1L;FPGS;MTHFR
PKA Activation R-HSA-163615	3/17	0.036092	0.4995	4.68511	15.5625	PRKCA;ADCY1;ADCY6
Signaling By Cytosolic FGFR1 Fusion Mutants R-HSA-1839117	3/17	0.036092	0.4995	4.68511	15.5625	CPSF6;CNTRL;MYO18A
Downstream Signaling Of Activated FGFR2 R-HSA-5654696	4/29	0.036481	0.4995	3.50021	11.5891	PIGU;FGF7;FGF18;FGF4
Regulation Of PLK1 Activity At G2/M Transition R-HSA-2565942	8/87	0.0369011	0.4995	2.21922	7.32236	CCNB2;DYNC1H1;CEP135;FBXW11;TUBB;CNTRL;PRKCA;RAB8A
Toll Like Receptor 7/8 (TLR7/8) Cascade R-HSA-168181	9/103	0.0370079	0.4995	2.09899	6.91959	MAPK11;IRAK1;FBXW11;RIPK2;RPS6KA2;KCNH8;TLR7;TP53;NFKB2
NCAM Signaling For Neurite Out-Growth R-HSA-375165	6/57	0.0380416	0.4995	2.57608	8.42139	CACNB2;ARTN;COL4A5;FYN;CACNA1H;GFRA4
Transport Of Mature mRNAs Derived From Intronless Transcripts R-HSA-159234	5/43	0.0389696	0.4995	2.8798	9.34487	NUP205;NUP133;NUP62;TPR;SYMPK
Opioid Signaling R-HSA-111885	8/88	0.0390989	0.4995	2.19137	7.10368	PLCB4;PDE4D;GNB1;ITPR1;PRKCA;ITPR3;ADCY1;ADCY6
Metabolism R-HSA-1430728	106/2049	0.0396309	0.4995	1.21563	3.92423	MSMO1;ENO2;ENO3;HS6ST2;PPIP5K1;FPGS;GYG1;SECISBP2;GLCE;ACSL5;PRKCA;CACNB2;PLPP6;ALDH3A1;SCO2;PSME1;SUCLG2;PLA2R1;PLA1A;NUP205;CEMIP;NPRL2;ITPR1;ITPR3;NRF1;MTMR4;CYP19A1;NPAS2;FUT4;CIAO1;SULT1A1;HSD11B2;DGUOK;TPR;IP6K1;HMOX2;SULT1A2;IP6K2;GLYATL1;OSBPL5;OSBPL2;MTHFR;PYCR1;B3GALT6;AZIN1;UCKL1;CS;COQ3;AMACR;EPRS1;GNB1;PI4KA;MMS19;DHCR7;GALK1;SNAP25;DIDO1;SLC44A1;PFAS;MED17;MED12;GUK1;DSE;NUP62;PGLS;…
HCMV Infection R-HSA-9609646	10/121	0.0401039	0.4995	1.97554	6.35389	PCSK1;DYNC1H1;NUP205;DUT;HDAC3;NUP133;KCNH8;TPR;NUP62;EZH2
FGFR1 Mutant Receptor Activation R-HSA-1839124	4/30	0.0406826	0.4995	3.36541	10.7759	CPSF6;CNTRL;MYO18A;FGF4
Glucose Metabolism R-HSA-70326	8/89	0.0413823	0.4995	2.1642	6.89277	NUP205;NUP133;NUP62;TPR;PRKCA;ENO2;SLC37A4;ENO3
PI-3K cascade:FGFR3 R-HSA-5654710	3/18	0.041937	0.4995	4.37254	13.8679	PIGU;FGF18;FGF4
Phospholipase C-mediated Cascade; FGFR2 R-HSA-5654221	3/18	0.041937	0.4995	4.37254	13.8679	FGF7;FGF18;FGF4
VEGFR2 Mediated Cell Proliferation R-HSA-5218921	3/18	0.041937	0.4995	4.37254	13.8679	ITPR1;ITPR3;PRKCA
Regulation Of TP53 Activity R-HSA-5633007	12/157	0.0437929	0.4995	1.81571	5.68007	TAF7L;MAPK11;BLM;PRKAA1;MRE11;TBP;ARTN;TTC5;CHD4;PRKAB1;TP53;TAF1
Axonal Growth Inhibition (RHOA Activation) R-HSA-193634	2/8	0.045104	0.4995	7.28267	22.5674	LINGO1;RHOA
Miro GTPase Cycle R-HSA-9715370	2/8	0.045104	0.4995	7.28267	22.5674	TRAK1;TRAK2
Antigen Activates B Cell Receptor Leading To Second Messenger Generation R-HSA-983695	4/31	0.045147	0.4995	3.24059	10.0388	ITPR1;ORAI1;ITPR3;FYN
Glutamate Binding, Activation Of AMPA Receptors And Synaptic Plasticity R-HSA-399721	4/31	0.045147	0.4995	3.24059	10.0388	PRKCA;AP2B1;GRIA3;GRIA4
Sensory Processing Of Sound R-HSA-9659379	7/75	0.045942	0.4995	2.25465	6.94516	SNAP25;CACNB2;KCNMB1;MYH9;CHRNA10;FSCN2;KIF20B
SUMOylation Of DNA Replication Proteins R-HSA-4615885	5/45	0.0460921	0.4995	2.73552	8.41751	NUP205;PCNA;NUP133;NUP62;TPR
EPH-Ephrin Signaling R-HSA-2682334	8/91	0.0462105	0.4995	2.11183	6.49293	MYH9;FYN;MYH11;AP2B1;EPHA1;MYL9;RHOA;EPHB3
Beta-catenin Independent WNT Signaling R-HSA-3858494	11/142	0.0480868	0.4995	1.84151	5.58852	TCF7L1;FZD2;PSMA4;GNB1;PSME1;ITPR1;PRKCA;ITPR3;PDE6A;AP2B1;RHOA
GABA Synthesis, Release, Reuptake And Degradation R-HSA-888590	3/19	0.0482251	0.4995	4.09904	12.4278	HSPA8;SNAP25;SLC6A1
PKA-mediated Phosphorylation Of CREB R-HSA-111931	3/19	0.0482251	0.4995	4.09904	12.4278	PRKCA;ADCY1;ADCY6
Activated TAK1 Mediates P38 MAPK Activation R-HSA-450302	3/19	0.0482251	0.4995	4.09904	12.4278	MAPK11;IRAK1;RIPK2
SUMOylation Of DNA Damage Response And Repair Proteins R-HSA-3108214	7/76	0.048775	0.4995	2.22186	6.7112	MDC1;BLM;NUP205;NUP133;PCGF2;NUP62;TPR
Defective TPR May Confer Susceptibility Towards Thyroid Papillary Carcinoma (TPC) R-HSA-5619107	4/32	0.0498735	0.4995	3.12469	9.36866	NUP205;NUP133;NUP62;TPR
Glucagon Signaling In Metabolic Regulation R-HSA-163359	4/32	0.0498735	0.4995	3.12469	9.36866	GNB1;PRKCA;ADCY1;ADCY6
Inactivation, Recovery And Regulation Of Phototransduction Cascade R-HSA-2514859	4/32	0.0498735	0.4995	3.12469	9.36866	GNB1;RHO;PRKCA;PDE6A
HIV Transcription Initiation R-HSA-167161	5/46	0.0499245	0.4995	2.66866	7.99863	TAF7L;GTF2A1;TBP;ERCC2;TAF1
SARS-CoV-2-host Interactions R-HSA-9705683	14/196	0.0503143	0.4995	1.6883	5.04711	IFNA4;NUP205;NUP133;RIPK2;YWHAB;IFNA17;IRAK1;TPR;NUP62;TRIM25;TLR7;GEMIN8;SEC24C;IFNA10
Infectious Disease R-HSA-5663205	53/961	0.0507396	0.4995	1.2903	3.84646	CYFIP2;SNAP25;PCSK1;IFNA4;YWHAB;CHD4;ZDHHC8;TAF7L;PYCARD;NUP62;TRIM25;AP1S1;GPR39;TBP;NUP133;RIPK2;IFNA17;KCNH8;TUBB;PRKCA;RBX1;PSMA4;DAD1;PSME1;MYH9;TLR7;GEMIN8;IFNA10;GTF2A1;CALCA;NUP205;HDAC3;ITPR1;ITPR3;ADCY1;ADCY6;SV2C;IRAK1;TPR;FYN;BRD4;DYNC1H1;DUT;AP2B1;NFKB2;FXYD2;GNB1;ERCC2;MGAT4B;STT3A;SEC24C;EZH2;TAF1
VEGFA-VEGFR2 Pathway R-HSA-4420097	8/93	0.051393	0.4995	2.06192	6.12031	CYFIP2;MAPK11;ITPR1;ITGAV;PRKCA;ITPR3;FYN;RHOA
Regulation Of Insulin Secretion R-HSA-422356	7/77	0.0517166	0.4995	2.19	6.48673	SNAP25;CACNB2;GNB1;ITPR1;PRKCA;ITPR3;ADCY6
Cell Cycle Checkpoints R-HSA-69620	18/271	0.0532302	0.4995	1.5629	4.58418	MDC1;DYNC1H1;BLM;MRE11;NUP133;ZWILCH;YWHAB;BUB1B;CCNB2;ORC4;CENPF;PSMA4;ARTN;PSME1;KIF2C;ANAPC5;TP53;ITGB3BP
MAP Kinase Activation R-HSA-450294	6/62	0.0537942	0.4995	2.34546	6.85481	MAPK11;IRAK1;FBXW11;RIPK2;RPS6KA2;KCNH8
G Alpha (Z) Signaling Events R-HSA-418597	5/47	0.0539386	0.4995	2.60499	7.60632	PRKCH;GNB1;PRKCA;ADCY1;ADCY6
SUMOylation Of RNA Binding Proteins R-HSA-4570464	5/47	0.0539386	0.4995	2.60499	7.60632	NUP205;NUP133;PCGF2;NUP62;TPR
NOD1/2 Signaling Pathway R-HSA-168638	4/33	0.0548611	0.4995	3.01679	8.75759	MAPK11;IRAK1;RIPK2;CASP2
Resolution Of D-loop Structures Thru Holliday Junction Intermediates R-HSA-5693568	4/33	0.0548611	0.4995	3.01679	8.75759	RAD51B;BLM;MRE11;ARTN
Phototransduction Cascade R-HSA-2514856	4/33	0.0548611	0.4995	3.01679	8.75759	GNB1;RHO;PRKCA;PDE6A
FGFR2 Ligand Binding And Activation R-HSA-190241	3/20	0.0549455	0.4995	3.85772	11.1928	FGF7;FGF18;FGF4
PI-3K cascade:FGFR4 R-HSA-5654720	3/20	0.0549455	0.4995	3.85772	11.1928	PIGU;FGF18;FGF4
Processing Of Intronless Pre-mRNAs R-HSA-77595	3/20	0.0549455	0.4995	3.85772	11.1928	CPSF6;PCF11;SYMPK
Post-translational Protein Modification R-HSA-597592	73/1383	0.0561463	0.4995	1.23462	3.55545	MDC1;PIGU;USP37;WDR48;TPGS1;RAB22A;DCAF7;GALNT10;GMPPB;TUBA1B;NUP62;ADAMTSL2;GMPPA;TRIM25;LARGE1;RAB8A;FBXO9;ADAMTS7;ALG8;USP48;TRAPPC2L;NUP133;USP5;RIPK2;FBXW11;COG5;TUBB;ACTL6A;VASH2;COMMD3;COPZ1;RHOA;RBX1;KAT2A;PSMA4;DAD1;RAB34;PSME1;TP53;ARF5;B4GALT4;BLM;NUP205;RAB5B;PCNA;GOSR2;B3GLCT;COPS7A;GATA3;TTL;MUC1;RNF139;TPR;SOCS5;SEC31A;DYNC1H1;HSPA8;USP20;MBD1;PCGF2;AMFR;LSAMP;NFKB2;AGBL5;AGBL4;NAG…
ATF6 (ATF6-alpha) Activates Chaperone Genes R-HSA-381183	2/9	0.0563376	0.4995	6.24196	17.9543	HSPA5;DDIT3
Activation Of Ca-permeable Kainate Receptor R-HSA-451308	2/9	0.0563376	0.4995	6.24196	17.9543	GRIK1;NCALD
Adenylate Cyclase Activating Pathway R-HSA-170660	2/9	0.0563376	0.4995	6.24196	17.9543	ADCY1;ADCY6
Hydrolysis Of LPC R-HSA-1483115	2/9	0.0563376	0.4995	6.24196	17.9543	PLA2G4B;PLA2G4C
Lipophagy R-HSA-9613354	2/9	0.0563376	0.4995	6.24196	17.9543	HSPA8;PRKAB1
Prostanoid Ligand Receptors R-HSA-391908	2/9	0.0563376	0.4995	6.24196	17.9543	PTGFR;TBXA2R
TRAF6 Mediated IRF7 Activation In TLR7/8 Or 9 Signaling R-HSA-975110	2/9	0.0563376	0.4995	6.24196	17.9543	IRAK1;TLR7
p75NTR Regulates Axonogenesis R-HSA-193697	2/9	0.0563376	0.4995	6.24196	17.9543	LINGO1;RHOA
MyD88 Cascade Initiated On Plasma Membrane R-HSA-975871	8/96	0.059844	0.51132	1.99132	5.60758	MAPK11;IRAK1;FBXW11;RIPK2;RPS6KA2;KCNH8;TP53;NFKB2
Protein Folding R-HSA-391251	8/96	0.059844	0.51132	1.99132	5.60758	NOP56;TUBA1B;HDAC3;TUBB;GNB1;TBCD;TP53;DCAF7
Host Interactions Of HIV Factors R-HSA-162909	10/130	0.059918	0.51132	1.82651	5.14122	NUP205;PSMA4;NUP133;TPR;NUP62;PSME1;AP1S1;FYN;AP2B1;RBX1
Negative Regulation Of FGFR2 Signaling R-HSA-5654727	4/34	0.0601075	0.51132	2.91607	8.1989	FGF7;MKNK1;FGF18;FGF4
Nuclear Import Of Rev Protein R-HSA-180746	4/34	0.0601075	0.51132	2.91607	8.1989	NUP205;NUP133;NUP62;TPR
Resolution Of D-Loop Structures R-HSA-5693537	4/34	0.0601075	0.51132	2.91607	8.1989	RAD51B;BLM;MRE11;ARTN
RHO GTPases Activate PAKs R-HSA-5627123	3/21	0.062086	0.515611	3.64321	10.1253	MYH9;MYH11;MYL9
Signaling By FGFR3 In Disease R-HSA-5655332	3/21	0.062086	0.515611	3.64321	10.1253	PIGU;FGF18;FGF4
Synaptic Adhesion-Like Molecules R-HSA-8849932	3/21	0.062086	0.515611	3.64321	10.1253	PTPRD;GRIA3;GRIA4
Anchoring Of Basal Body To Plasma Membrane R-HSA-5620912	8/97	0.0628439	0.515611	1.96884	5.44798	IQCB1;DYNC1H1;CEP135;TCTN3;TUBB;CNTRL;PRKCA;RAB8A
Signaling By NOTCH R-HSA-157118	14/203	0.0636135	0.515611	1.62517	4.47722	PTCRA;JAG1;HDAC3;SIRT6;RBX1;ACTA2;HEYL;KAT2A;PSMA4;HEY2;PSME1;CNTN1;TP53;MAMLD1
Signaling By NTRKs R-HSA-166520	10/132	0.0650542	0.515611	1.79638	4.90866	MAPK11;PIGU;YWHAB;RPS6KA2;KCNH8;ID3;CHD4;FYN;AP2B1;RHOA
NEP/NS2 Interacts With Cellular Export Machinery R-HSA-168333	4/35	0.06561	0.515611	2.82186	7.68682	NUP205;NUP133;NUP62;TPR
Rev-mediated Nuclear Export Of HIV RNA R-HSA-165054	4/35	0.06561	0.515611	2.82186	7.68682	NUP205;NUP133;NUP62;TPR
SUMOylation Of SUMOylation Proteins R-HSA-4085377	4/35	0.06561	0.515611	2.82186	7.68682	NUP205;NUP133;NUP62;TPR
Transport Of Ribonucleoproteins Into Host Nucleus R-HSA-168271	4/35	0.06561	0.515611	2.82186	7.68682	NUP205;NUP133;NUP62;TPR
Transport Of SLBP Independent Mature mRNA R-HSA-159227	4/35	0.06561	0.515611	2.82186	7.68682	NUP205;NUP133;NUP62;TPR
Vpr-mediated Nuclear Import Of PICs R-HSA-180910	4/35	0.06561	0.515611	2.82186	7.68682	NUP205;NUP133;NUP62;TPR
Hedgehog Off State R-HSA-5610787	8/98	0.0659359	0.515611	1.94686	5.29365	PSMA4;KIF3A;GPR161;PSME1;PRKCA;ADCY1;ADCY6;RBX1
Neurotransmitter Release Cycle R-HSA-112310	5/50	0.0670692	0.515693	2.43094	6.56847	SNAP25;HSPA8;SLC22A2;SLC6A1;SYN3
Abacavir ADME R-HSA-2161522	2/10	0.0684222	0.515693	5.46143	14.6479	GUK1;SLC22A2
Activation Of AMPK Downstream Of NMDARs R-HSA-9619483	2/10	0.0684222	0.515693	5.46143	14.6479	PRKAA1;PRKAB1
Activation Of PPARGC1A (PGC-1alpha) By Phosphorylation R-HSA-2151209	2/10	0.0684222	0.515693	5.46143	14.6479	MAPK11;PRKAB1
Neurotoxicity Of Clostridium Toxins R-HSA-168799	2/10	0.0684222	0.515693	5.46143	14.6479	SNAP25;SV2C
Synthesis Of Pyrophosphates In Cytosol R-HSA-1855167	2/10	0.0684222	0.515693	5.46143	14.6479	PPIP5K1;IP6K1
Cellular Response To Heat Stress R-HSA-3371556	8/99	0.0691205	0.515693	1.92537	5.14439	HSPA8;NUP205;HSPA5;NUP133;TPR;NUP62;COL4A6;HSPA2
ERK/MAPK Targets R-HSA-198753	3/22	0.0696329	0.515693	3.45128	9.19601	MAPK11;KCNH8;RPS6KA2
SHC-mediated cascade:FGFR2 R-HSA-5654699	3/22	0.0696329	0.515693	3.45128	9.19601	FGF7;FGF18;FGF4
Export Of Viral Ribonucleoproteins From Nucleus R-HSA-168274	4/36	0.0713652	0.521369	2.73353	7.21638	NUP205;NUP133;NUP62;TPR
Transport Of SLBP Dependant Mature mRNA R-HSA-159230	4/36	0.0713652	0.521369	2.73353	7.21638	NUP205;NUP133;NUP62;TPR
Translocation Of SLC2A4 (GLUT4) To Plasma Membrane R-HSA-1445148	5/51	0.0718069	0.521369	2.37797	6.26303	YWHAB;KIF3A;MYH9;PRKAB1;RAB8A
Asparagine N-linked Glycosylation R-HSA-446203	18/282	0.0720558	0.521369	1.4969	3.93733	DYNC1H1;ALG8;TRAPPC2L;COG5;GOSR2;AMFR;COPZ1;GMPPB;NAGK;RNF139;DAD1;GMPPA;MGAT4B;STT3A;SEC24C;ARF5;B4GALT4;SEC31A
Metabolism Of Steroids R-HSA-8957322	11/153	0.0738111	0.528238	1.69787	4.42508	PLPP6;HSD11B2;AMACR;FABP6;OSBPL2;HSD17B2;MSMO1;DHCR7;CYP19A1;CYP8B1;SEC24C
SARS-CoV-2 Infection R-HSA-9694516	18/283	0.0739638	0.528238	1.49118	3.88329	IFNA4;NUP205;NUP133;RIPK2;YWHAB;IFNA17;ZDHHC8;IRAK1;DAD1;TPR;NUP62;MGAT4B;STT3A;TRIM25;TLR7;GEMIN8;SEC24C;IFNA10
Axon Guidance R-HSA-422475	30/519	0.0757343	0.528238	1.34969	3.48292	PIGU;SEMA7A;CNTNAP1;CACNA1H;DPYSL2;RPS6KA2;ZSWIM8;HOXA2;ITGAV;FYN;MYH11;EPHB3;HSPA8;PRKCA;AP2B1;RHOA;RBX1;GFRA4;BUB1B-PAK6;CACNB2;MAPK11;PSMA4;ARTN;PSME1;CNTN1;COL4A5;MYH9;EPHA1;MYL9;DSCAML1
Interactions Of Rev With Host Cellular Proteins R-HSA-177243	4/37	0.0773691	0.528238	2.65056	6.78323	NUP205;NUP133;NUP62;TPR
Post-chaperonin Tubulin Folding Pathway R-HSA-389977	3/23	0.0775713	0.528238	3.27855	8.3818	TUBA1B;TUBB;TBCD
RHO GTPases Activate Formins R-HSA-5663220	9/119	0.0780527	0.528238	1.79218	4.57071	FMNL3;DYNC1H1;CENPF;NUP133;ZWILCH;BUB1B;KIF2C;RHOA;ITGB3BP
Potassium Channels R-HSA-1296071	8/102	0.0792304	0.528238	1.86362	4.72502	KCNG1;KCNH8;KCNMB1;GNB1;KCNJ16;KCNA5;KCNK17;KCNH1
Signaling By VEGF R-HSA-194138	8/102	0.0792304	0.528238	1.86362	4.72502	CYFIP2;MAPK11;ITPR1;PRKCA;ITPR3;ITGAV;FYN;RHOA
HIV Infection R-HSA-162906	15/229	0.0797664	0.528238	1.53758	3.88802	GTF2A1;NUP205;TBP;NUP133;AP2B1;RBX1;TAF7L;PSMA4;TPR;NUP62;ERCC2;PSME1;AP1S1;FYN;TAF1
ATF6 (ATF6-alpha) Activates Chaperones R-HSA-381033	2/11	0.0812619	0.528238	4.85435	12.1848	HSPA5;DDIT3
CLEC7A (Dectin-1) Induces NFAT Activation R-HSA-5607763	2/11	0.0812619	0.528238	4.85435	12.1848	ITPR1;ITPR3
DSCAM Interactions R-HSA-376172	2/11	0.0812619	0.528238	4.85435	12.1848	MAPK11;DSCAML1
Pyrimidine Salvage R-HSA-73614	2/11	0.0812619	0.528238	4.85435	12.1848	SCO2;UCKL1
Regulation Of Signaling By NODAL R-HSA-1433617	2/11	0.0812619	0.528238	4.85435	12.1848	ACVR1B;ACVR2A
WNT5A-dependent Internalization Of FZD2, FZD5 And ROR2 R-HSA-5140745	2/11	0.0812619	0.528238	4.85435	12.1848	FZD2;AP2B1
Intracellular Signaling By Second Messengers R-HSA-9006925	19/306	0.0814424	0.528238	1.45336	3.64482	PDGFRB;PIGU;CBX6;HDAC3;ITPR1;PRKCA;ITPR3;CHD4;ADCY1;ADCY6;FGF4;FGF7;PSMA4;IRAK1;FGF18;PSME1;FYN;TP53;EZH2
SUMOylation R-HSA-2990846	12/174	0.0814823	0.528238	1.62372	4.07127	MDC1;BLM;NUP205;PCNA;NUP133;MBD1;PCGF2;TPR;NUP62;SAE1;TP53;NFKB2
Cell Cycle, Mitotic R-HSA-69278	30/523	0.0815979	0.528238	1.33846	3.3541	NUP205;PCNA;ZWILCH;BUB1B;ORC4;CCNB2;TUBA1B;TPR;CNTRL;NUP62;E2F2;LCMT1;RAB8A;DYNC1H1;GINS2;CEP135;NUP133;FBXW11;TUBB;PRKCA;CDC25B;RBX1;CENPF;POLA2;PSMA4;PSME1;ANAPC5;KIF2C;TP53;ITGB3BP
Interleukin-17 Signaling R-HSA-448424	6/69	0.0816135	0.528238	2.08409	5.22222	MAPK11;IRAK1;FBXW11;RIPK2;RPS6KA2;KCNH8
Heparan Sulfate/Heparin (HS-GAG) Metabolism R-HSA-1638091	5/53	0.081816	0.528238	2.27865	5.70409	GLCE;B3GAT2;B3GALT6;HS3ST4;HS6ST2
Sensory Processing Of Sound By Outer Hair Cells Of Cochlea R-HSA-9662361	5/53	0.081816	0.528238	2.27865	5.70409	KCNMB1;MYH9;CHRNA10;FSCN2;KIF20B
Toll Like Receptor 3 (TLR3) Cascade R-HSA-168164	8/103	0.082786	0.531686	1.84391	4.5941	MAPK11;IRAK1;FBXW11;RIPK2;RPS6KA2;KCNH8;TP53;NFKB2
Association Of TriC/CCT With Target Proteins During Biosynthesis R-HSA-390471	4/38	0.083617	0.531686	2.57247	6.3836	NOP56;HDAC3;TP53;DCAF7
Interactions Of Vpr With Host Cellular Proteins R-HSA-176033	4/38	0.083617	0.531686	2.57247	6.3836	NUP205;NUP133;NUP62;TPR
Downstream Signaling Of Activated FGFR3 R-HSA-5654708	3/24	0.0858853	0.539873	3.12226	7.66435	PIGU;FGF18;FGF4
FRS-mediated FGFR2 Signaling R-HSA-5654700	3/24	0.0858853	0.539873	3.12226	7.66435	FGF7;FGF18;FGF4
MHC Class II Antigen Presentation R-HSA-2132295	8/104	0.0864342	0.539873	1.82461	4.46732	DYNC1H1;KIF5C;KIF3A;AP1S1;KIF2C;AP2B1;SEC24C;SEC31A
Mitotic Anaphase R-HSA-68882	15/232	0.0867849	0.539873	1.51609	3.7058	DYNC1H1;NUP205;NUP133;ZWILCH;TUBB;BUB1B;CCNB2;TUBA1B;CENPF;PSMA4;NUP62;PSME1;KIF2C;ANAPC5;ITGB3BP
Pyruvate Metabolism And Citric Acid (TCA) Cycle R-HSA-71406	5/54	0.087084	0.539873	2.23203	5.44811	CS;PLPP6;PCDHGA5;IDH3G;SUCLG2
Mitotic Metaphase And Anaphase R-HSA-2555396	15/233	0.0892091	0.539873	1.50905	3.64703	DYNC1H1;NUP205;NUP133;ZWILCH;TUBB;BUB1B;CCNB2;TUBA1B;CENPF;PSMA4;NUP62;PSME1;KIF2C;ANAPC5;ITGB3BP
Ovarian Tumor Domain Proteases R-HSA-5689896	4/39	0.0901038	0.539873	2.49884	6.01419	RIPK2;TRIM25;TP53;RHOA
SUMOylation Of Ubiquitinylation Proteins R-HSA-3232142	4/39	0.0901038	0.539873	2.49884	6.01419	NUP205;NUP133;NUP62;TPR
Signaling By FGFR3 R-HSA-5654741	4/39	0.0901038	0.539873	2.49884	6.01419	PIGU;MKNK1;FGF18;FGF4
Integration Of Energy Metabolism R-HSA-163685	8/105	0.0901749	0.539873	1.8057	4.34453	CACNB2;SNAP25;GNB1;ITPR1;PRKCA;ITPR3;ADCY1;ADCY6
tRNA Processing R-HSA-72306	8/105	0.0901749	0.539873	1.8057	4.34453	NUP205;EPRS1;NUP133;TPR;NUP62;LAGE3;OSGEP;GTPBP3
Protein-protein Interactions At Synapses R-HSA-6794362	7/88	0.0913612	0.539873	1.8915	4.52624	PTPRD;SLITRK2;NRXN1;NRXN2;HOMER3;GRIA3;GRIA4
C-type Lectin Receptors (CLRs) R-HSA-5621481	10/141	0.0915838	0.539873	1.67217	3.99732	PYCARD;MUC1;PSMA4;FBXW11;PSME1;ITPR1;PRKCA;ITPR3;FYN;NFKB2
G Alpha (I) Signaling Events R-HSA-418594	19/312	0.0939164	0.539873	1.42314	3.36624	GPSM2;CCL21;PDE4D;ITPR1;TAS2R14;PRKCA;ITPR3;ADCY1;ADCY6;CXCL10;GRM2;CNOT6;PLCB4;GNB1;RHO;ADORA1;NMUR1;S1PR3;CCL19
Resolution Of Sister Chromatid Cohesion R-HSA-2500257	8/106	0.0940077	0.539873	1.78718	4.22558	CCNB2;DYNC1H1;CENPF;NUP133;ZWILCH;BUB1B;KIF2C;ITGB3BP
Cyclin A/B1/B2 Associated Events During G2/M Transition R-HSA-69273	3/25	0.0945584	0.539873	2.98019	7.02888	CCNB2;LCMT1;CDC25B
Regulation Of IFNA/IFNB Signaling R-HSA-912694	3/25	0.0945584	0.539873	2.98019	7.02888	IFNA4;IFNA17;IFNA10
CREB1 Phosphorylation Thru Activation Of Adenylate Cyclase R-HSA-442720	2/12	0.0947673	0.539873	4.36869	10.2941	PRKCA;ADCY1
Disorders Of Developmental Biology R-HSA-9675151	2/12	0.0947673	0.539873	4.36869	10.2941	HDAC3;PRKCA
FGFR3 Mutant Receptor Activation R-HSA-2033514	2/12	0.0947673	0.539873	4.36869	10.2941	FGF18;FGF4
HDR Thru MMEJ (alt-NHEJ) R-HSA-5685939	2/12	0.0947673	0.539873	4.36869	10.2941	MRE11;ARTN
PECAM1 Interactions R-HSA-210990	2/12	0.0947673	0.539873	4.36869	10.2941	FYN;ITGAV
TP53 Regulates Transcription Of Caspase Activators And Caspases R-HSA-6803207	2/12	0.0947673	0.539873	4.36869	10.2941	CASP2;TP53
Mitochondrial Biogenesis R-HSA-1592230	7/89	0.0956276	0.541783	1.86833	4.38553	MAPK11;HDAC3;MICOS13;NRF1;TFB1M;PRKAB1;ATP5F1D
Presynaptic Phase Of Homologous DNA Pairing And Strand Exchange R-HSA-5693616	4/40	0.0968238	0.541783	2.4293	5.67208	RAD51B;BLM;MRE11;ARTN
RET Signaling R-HSA-8853659	4/40	0.0968238	0.541783	2.4293	5.67208	PIGU;ARTN;PRKCA;GFRA4
Signaling By FGFR4 R-HSA-5654743	4/40	0.0968238	0.541783	2.4293	5.67208	PIGU;MKNK1;FGF18;FGF4
MyD88-independent TLR4 Cascade R-HSA-166166	8/107	0.0979322	0.54556	1.76904	4.11032	MAPK11;IRAK1;FBXW11;RIPK2;RPS6KA2;KCNH8;TP53;NFKB2
Chaperonin-mediated Protein Folding R-HSA-390466	7/90	0.100003	0.55464	1.84573	4.2499	NOP56;TUBA1B;HDAC3;TUBB;GNB1;TP53;DCAF7
Attenuation Phase R-HSA-3371568	3/26	0.103573	0.559177	2.85046	6.46336	HSPA8;COL4A6;HSPA2
Cholesterol Biosynthesis R-HSA-191273	3/26	0.103573	0.559177	2.85046	6.46336	PLPP6;MSMO1;DHCR7
Downstream Signaling Of Activated FGFR4 R-HSA-5654716	3/26	0.103573	0.559177	2.85046	6.46336	PIGU;FGF18;FGF4
Platelet Calcium Homeostasis R-HSA-418360	3/26	0.103573	0.559177	2.85046	6.46336	ITPR1;ORAI1;ITPR3
Defective Homologous Recombination Repair (HRR) Due To BRCA2 Loss Of Function R-HSA-9701190	4/41	0.103771	0.559177	2.36352	5.35471	RAD51B;BLM;MRE11;ARTN
SUMOylation Of Chromatin Organization Proteins R-HSA-4551638	5/57	0.103914	0.559177	2.10292	4.76143	NUP205;NUP133;PCGF2;NUP62;TPR
Activation Of HOX Genes During Differentiation R-HSA-5619507	7/91	0.104485	0.559177	1.82366	4.11911	CNOT6;HDAC3;HOXD1;PCGF2;HOXA2;HOXA4;EZH2
Adenylate Cyclase Inhibitory Pathway R-HSA-170670	2/13	0.108855	0.559177	3.97132	8.80734	ADCY1;ADCY6
FGFR2c Ligand Binding And Activation R-HSA-190375	2/13	0.108855	0.559177	3.97132	8.80734	FGF18;FGF4
FGFR3 Ligand Binding And Activation R-HSA-190239	2/13	0.108855	0.559177	3.97132	8.80734	FGF18;FGF4
FGFRL1 Modulation Of FGFR1 Signaling R-HSA-5658623	2/13	0.108855	0.559177	3.97132	8.80734	FGF18;FGF4
Phospholipase C-mediated Cascade; FGFR3 R-HSA-5654227	2/13	0.108855	0.559177	3.97132	8.80734	FGF18;FGF4
p75NTR Recruits Signaling Complexes R-HSA-209543	2/13	0.108855	0.559177	3.97132	8.80734	IRAK1;RIPK2
Mitotic Spindle Checkpoint R-HSA-69618	8/110	0.110251	0.559177	1.71674	3.78539	DYNC1H1;CENPF;NUP133;ZWILCH;BUB1B;ANAPC5;KIF2C;ITGB3BP
ISG15 Antiviral Mechanism R-HSA-1169408	6/75	0.11075	0.559177	1.90226	4.18588	NUP205;NUP133;NUP62;TPR;TRIM25;FLNB
Nuclear Envelope (NE) Reassembly R-HSA-2995410	6/75	0.11075	0.559177	1.90226	4.18588	CCNB2;TUBA1B;NUP205;NUP133;TUBB;NUP62
Activation Of GABAB Receptors R-HSA-991365	4/42	0.110939	0.559177	2.3012	5.05983	GNB1;KCNJ16;ADCY1;ADCY6
Kinesins R-HSA-983189	4/42	0.110939	0.559177	2.3012	5.05983	KIF3A;KIF5C;KIF2C;KIF20B
NS1 Mediated Effects On Host Pathways R-HSA-168276	4/42	0.110939	0.559177	2.3012	5.05983	NUP205;NUP133;NUP62;TPR
Signaling By FGFR2 In Disease R-HSA-5655253	4/42	0.110939	0.559177	2.3012	5.05983	PIGU;FGF7;FGF18;FGF4
Vasopressin Regulates Renal Water Homeostasis Via Aquaporins R-HSA-432040	4/42	0.110939	0.559177	2.3012	5.05983	GNB1;PRKCA;ADCY1;ADCY6
tRNA Aminoacylation R-HSA-379724	4/42	0.110939	0.559177	2.3012	5.05983	AARS1;EPRS1;MARS2;EARS2
Acyl Chain Remodelling Of PC R-HSA-1482788	3/27	0.112912	0.559177	2.73155	5.95792	PLA2G4B;PLA2G4C;PLA2R1
Effects Of PIP2 Hydrolysis R-HSA-114508	3/27	0.112912	0.559177	2.73155	5.95792	PRKCH;ITPR1;ITPR3
Postmitotic Nuclear Pore Complex (NPC) Reformation R-HSA-9615933	3/27	0.112912	0.559177	2.73155	5.95792	NUP205;NUP133;NUP62
Role Of Nef In HIV-1 Replication And Disease Pathogenesis R-HSA-164952	3/27	0.112912	0.559177	2.73155	5.95792	AP1S1;FYN;AP2B1
Unattached Kinetochores Signal Amplification Via A MAD2 Inhibitory Signal R-HSA-141444	7/93	0.11377	0.559177	1.78106	3.87128	DYNC1H1;CENPF;NUP133;ZWILCH;BUB1B;KIF2C;ITGB3BP
GABA Receptor Activation R-HSA-977443	5/59	0.11596	0.559177	2.02483	4.36251	GNB1;NPTN;KCNJ16;ADCY1;ADCY6
G2/M Checkpoints R-HSA-69481	10/148	0.1161	0.559177	1.58676	3.41679	MDC1;CCNB2;ORC4;BLM;MRE11;PSMA4;ARTN;YWHAB;PSME1;TP53
Cilium Assembly R-HSA-5617833	12/186	0.117604	0.559177	1.51078	3.23372	IQCB1;DYNC1H1;CEP135;KIF3A;TCTN3;ARL3;TUBB;CNTRL;RHO;PRKCA;KIF17;RAB8A
Mitotic Prometaphase R-HSA-68877	12/186	0.117604	0.559177	1.51078	3.23372	CCNB2;DYNC1H1;CENPF;CEP135;NUP133;ZWILCH;TUBB;CNTRL;BUB1B;PRKCA;KIF2C;ITGB3BP
GPER1 Signaling R-HSA-9634597	4/43	0.11832	0.559177	2.24208	4.7854	GNB1;PRKCA;ADCY1;ADCY6
Homologous DNA Pairing And Strand Exchange R-HSA-5693579	4/43	0.11832	0.559177	2.24208	4.7854	RAD51B;BLM;MRE11;ARTN
Voltage Gated Potassium Channels R-HSA-1296072	4/43	0.11832	0.559177	2.24208	4.7854	KCNG1;KCNH8;KCNA5;KCNH1
Golgi-to-ER Retrograde Transport R-HSA-8856688	8/112	0.118912	0.559177	1.68354	3.58489	DYNC1H1;KIF5C;KIF3A;KIF2C;KIF20B;PAFAH1B3;COPZ1;ARF5
MyD88:MAL(TIRAP) Cascade Initiated On Plasma Membrane R-HSA-166058	8/112	0.118912	0.559177	1.68354	3.58489	MAPK11;IRAK1;FBXW11;RIPK2;RPS6KA2;KCNH8;TP53;NFKB2
Nervous System Development R-HSA-9675108	30/545	0.119343	0.559177	1.27977	2.72047	PIGU;SEMA7A;CNTNAP1;CACNA1H;DPYSL2;RPS6KA2;ZSWIM8;HOXA2;ITGAV;FYN;MYH11;EPHB3;HSPA8;PRKCA;AP2B1;RHOA;RBX1;GFRA4;BUB1B-PAK6;CACNB2;MAPK11;PSMA4;ARTN;PSME1;CNTN1;COL4A5;MYH9;EPHA1;MYL9;DSCAML1
SUMO E3 Ligases SUMOylate Target Proteins R-HSA-3108232	11/168	0.120799	0.559177	1.53444	3.24325	MDC1;BLM;NUP205;PCNA;NUP133;MBD1;PCGF2;TPR;NUP62;TP53;NFKB2
G2/M DNA Damage Checkpoint R-HSA-69473	6/77	0.1215	0.559177	1.84848	3.8963	MDC1;BLM;MRE11;YWHAB;ARTN;TP53
Adrenaline,noradrenaline Inhibits Insulin Secretion R-HSA-400042	3/28	0.122556	0.559177	2.62215	5.50438	CACNB2;GNB1;ADCY6
Interconversion Of Nucleotide Di- And Triphosphates R-HSA-499943	3/28	0.122556	0.559177	2.62215	5.50438	DUT;GUK1;CTPS2
Notch-HLH Transcription Pathway R-HSA-350054	3/28	0.122556	0.559177	2.62215	5.50438	KAT2A;HDAC3;MAMLD1
Recycling Pathway Of L1 R-HSA-437239	3/28	0.122556	0.559177	2.62215	5.50438	DPYSL2;RPS6KA2;AP2B1
FGFR4 Ligand Binding And Activation R-HSA-190322	2/14	0.12345	0.559177	3.64019	7.615	FGF18;FGF4
LGI-ADAM Interactions R-HSA-5682910	2/14	0.12345	0.559177	3.64019	7.615	LGI1;ADAM23
Leading Strand Synthesis R-HSA-69109	2/14	0.12345	0.559177	3.64019	7.615	POLA2;PCNA
Pentose Phosphate Pathway R-HSA-71336	2/14	0.12345	0.559177	3.64019	7.615	RPE;PGLS
Removal Of Flap Intermediate R-HSA-69166	2/14	0.12345	0.559177	3.64019	7.615	POLA2;PCNA
Synthesis Of Bile Acids And Bile Salts Via 24-Hydroxycholesterol R-HSA-193775	2/14	0.12345	0.559177	3.64019	7.615	AMACR;CYP8B1
Transcriptional Regulation By RUNX3 R-HSA-8878159	7/95	0.123472	0.559177	1.7404	3.64047	KAT2A;TCF7L1;PSMA4;JAG1;PSME1;TP53;MAMLD1
P75 NTR Receptor-Mediated Signaling R-HSA-193704	7/95	0.123472	0.559177	1.7404	3.64047	LINGO1;HDAC3;IRAK1;RIPK2;CASP2;RHOA;ITGB3BP
PI3K Cascade R-HSA-109704	4/44	0.125908	0.564298	2.18591	4.52965	PIGU;FGF7;FGF18;FGF4
COPI-dependent Golgi-to-ER Retrograde Traffic R-HSA-6811434	6/78	0.127061	0.564298	1.82271	3.76041	KIF5C;KIF3A;KIF2C;KIF20B;COPZ1;ARF5
Constitutive Signaling By Aberrant PI3K In Cancer R-HSA-2219530	6/78	0.127061	0.564298	1.82271	3.76041	PDGFRB;PIGU;FGF7;FGF18;FYN;FGF4
Developmental Biology R-HSA-1266738	55/1073	0.127889	0.564298	1.18999	2.44731	PIGU;CNTNAP1;TNF;MED17;MED12;DPYSL2;RPS6KA2;BOC;HOXA2;KRTAP5-2;ITGAV;EPHB3;HOXA4;EOMES;PRKCA;MED29;RHOA;RBX1;GFRA4;CACNB2;KAT2A;PSMA4;PSME1;COL4A5;MYH9;EPHA1;MYL9;DSCAML1;SEMA7A;HDAC3;KMT2A;HOXD1;ACVR1B;CACNA1H;LCE3A;ADAM23;ZSWIM8;FYN;MYH11;NKX2-2;LGI1;HSPA8;TCF7L1;PCGF2;NR2F2;AP2B1;ACVR2A;BUB1B-PAK6;MAPK11;CNOT6;WT1;ARTN;CNTN1;MAMLD1;EZH2
Interleukin-1 Signaling R-HSA-9020702	8/114	0.127924	0.564298	1.65161	3.39623	PSMA4;IRAK1;FBXW11;RIPK2;PSME1;TP53;RBX1;NFKB2
Signaling By NTRK1 (TRKA) R-HSA-187037	8/114	0.127924	0.564298	1.65161	3.39623	MAPK11;YWHAB;RPS6KA2;KCNH8;ID3;CHD4;AP2B1;RHOA
Nuclear Events (Kinase And Transcription Factor Activation) R-HSA-198725	5/61	0.128637	0.564298	1.95231	4.00372	MAPK11;RPS6KA2;KCNH8;ID3;CHD4
Post NMDA Receptor Activation Events R-HSA-438064	5/61	0.128637	0.564298	1.95231	4.00372	PRKAA1;RPS6KA2;PRKCA;ADCY1;PRKAB1
Regulation Of PTEN Gene Transcription R-HSA-8943724	5/61	0.128637	0.564298	1.95231	4.00372	CBX6;HDAC3;CHD4;TP53;EZH2
Activation Of Kainate Receptors Upon Glutamate Binding R-HSA-451326	3/29	0.132488	0.568655	2.52117	5.09594	GNB1;GRIK1;NCALD
Acyl Chain Remodelling Of PE R-HSA-1482839	3/29	0.132488	0.568655	2.52117	5.09594	PLA2G4B;PLA2G4C;PLA2R1
Myogenesis R-HSA-525793	3/29	0.132488	0.568655	2.52117	5.09594	MAPK11;TCF7L1;BOC
Negative Regulation Of FGFR3 Signaling R-HSA-5654732	3/29	0.132488	0.568655	2.52117	5.09594	MKNK1;FGF18;FGF4
Processing Of Capped Intronless Pre-mRNA R-HSA-75067	3/29	0.132488	0.568655	2.52117	5.09594	CPSF6;PCF11;SYMPK
EML4 And NUDC In Mitotic Spindle Formation R-HSA-9648025	7/97	0.133581	0.568655	1.70155	3.42529	DYNC1H1;CENPF;NUP133;ZWILCH;BUB1B;KIF2C;ITGB3BP
Potential Therapeutics For SARS R-HSA-9679191	7/97	0.133581	0.568655	1.70155	3.42529	FXYD2;TUBB;CHD4;TLR7;AP2B1;RBX1;BRD4
Bile Acid And Bile Salt Metabolism R-HSA-194068	4/45	0.133695	0.568655	2.13248	4.29097	AMACR;FABP6;OSBPL2;CYP8B1
TAK1-dependent IKK And NF-kappa-B Activation R-HSA-445989	4/45	0.133695	0.568655	2.13248	4.29097	IRAK1;RIPK2;TP53;NFKB2
RHO GTPase Effectors R-HSA-195258	16/269	0.13471	0.569752	1.38602	2.77845	CYFIP2;DYNC1H1;NUP133;ZWILCH;YWHAB;BUB1B;PRKCA;RHOA;FMNL3;MAPK11;CENPF;MYH9;KIF2C;MYH11;MYL9;ITGB3BP
RHO GTPases Activate PKNs R-HSA-5625740	5/62	0.135202	0.569752	1.91795	3.8378	YWHAB;MYH9;MYH11;MYL9;RHOA
DNA Repair R-HSA-73894	18/310	0.138389	0.569752	1.35136	2.67256	MDC1;BLM;WDR48;PCNA;MRE11;CENPX;ACTL6A;COPS7A;SIRT6;RBX1;RAD51B;ARTN;APEX1;UBE2T;UVSSA;ERCC2;TRIM25;TP53
Eicosanoid Ligand-Binding Receptors R-HSA-391903	2/15	0.138478	0.569752	3.36	6.64286	PTGFR;TBXA2R
Glycogen Storage Diseases R-HSA-3229121	2/15	0.138478	0.569752	3.36	6.64286	SLC37A4;GYG1
N-Glycan Antennae Elongation R-HSA-975577	2/15	0.138478	0.569752	3.36	6.64286	MGAT4B;B4GALT4
Phospholipase C-mediated Cascade; FGFR4 R-HSA-5654228	2/15	0.138478	0.569752	3.36	6.64286	FGF18;FGF4
Processive Synthesis On Lagging Strand R-HSA-69183	2/15	0.138478	0.569752	3.36	6.64286	POLA2;PCNA
Signaling By Activin R-HSA-1502540	2/15	0.138478	0.569752	3.36	6.64286	ACVR1B;ACVR2A
WNT5A-dependent Internalization Of FZD4 R-HSA-5099900	2/15	0.138478	0.569752	3.36	6.64286	PRKCA;AP2B1
Signaling By Hedgehog R-HSA-5358351	9/135	0.139138	0.570601	1.56328	3.08325	PSMA4;KIF3A;GPR161;BOC;PSME1;PRKCA;ADCY1;ADCY6;RBX1
RNA Polymerase I Transcription Initiation R-HSA-73762	4/46	0.141673	0.574863	2.0816	4.06793	KAT2A;TBP;ERCC2;CHD4
Signaling By Rho GTPases, Miro GTPases And RHOBTB3 R-HSA-9716542	35/660	0.141887	0.574863	1.23027	2.40238	CYFIP2;ZWILCH;DOCK9;YWHAB;BUB1B;RASAL2;TRAK1;TRAK2;GOLGA3;TUBA1B;FGD5;SH3PXD2A;MYH11;HMOX2;IL32;PLEKHG4;DYNC1H1;JAG1;NUP133;FNBP1;CCDC115;PRKCA;MYO9A;RHOA;BUB1B-PAK6;FMNL3;MAPK11;CENPF;DDX39B;CDC42EP5;MYH9;KIF2C;PDE5A;MYL9;ITGB3BP
HS-GAG Biosynthesis R-HSA-2022928	3/30	0.142688	0.574863	2.42766	4.72688	GLCE;HS3ST4;HS6ST2
MAPK Targets/ Nuclear Events Mediated By MAP Kinases R-HSA-450282	3/30	0.142688	0.574863	2.42766	4.72688	MAPK11;RPS6KA2;KCNH8
Recognition Of DNA Damage By PCNA-containing Replication Complex R-HSA-110314	3/30	0.142688	0.574863	2.42766	4.72688	PCNA;WDR48;RBX1
Late Phase Of HIV Life Cycle R-HSA-162599	9/136	0.143601	0.574863	1.55089	3.00984	TAF7L;GTF2A1;NUP205;TBP;NUP133;TPR;NUP62;ERCC2;TAF1
CLEC7A (Dectin-1) Signaling R-HSA-5607764	7/99	0.144085	0.574863	1.66438	3.22449	PYCARD;PSMA4;FBXW11;PSME1;ITPR1;ITPR3;NFKB2
L1CAM Interactions R-HSA-373760	7/99	0.144085	0.574863	1.66438	3.22449	HSPA8;CNTNAP1;DPYSL2;RPS6KA2;CNTN1;ITGAV;AP2B1
TP53 Regulates Metabolic Genes R-HSA-5628897	6/81	0.144461	0.574863	1.74953	3.38489	PRKAA1;PRDX5;YWHAB;SCO2;PRKAB1;TP53
Membrane Trafficking R-HSA-199991	32/599	0.144948	0.574863	1.23935	2.39366	RAB5B;YWHAB;GOSR2;AP4E1;COPS7A;CD3D;GJC2;ALS2CL;KIF5C;KIF3A;AP1S1;SNX5;RAB8A;SEC31A;DYNC1H1;HSPA8;TRAPPC2L;FNBP1;COG5;DENND2B;AP2B1;PRKAB1;COPZ1;NECAP2;TBC1D7;MYH9;KIF2C;DENND6B;KIF20B;PAFAH1B3;SEC24C;ARF5
Transcriptional Regulation By TP53 R-HSA-3700989	20/354	0.148975	0.574863	1.31282	2.49959	MDC1;BLM;PRKAA1;PCNA;MRE11;TBP;YWHAB;CHD4;PRKAB1;TAF7L;MAPK11;PRDX5;CNOT6;SCO2;ARTN;TTC5;ERCC2;CASP2;TP53;TAF1
Stimuli-sensing Channels R-HSA-2672351	7/100	0.149481	0.574863	1.6464	3.12912	CLCN6;SCNN1A;FKBP1B;ANO9;TRPV1;TRPC4AP;RYR3
TNFR2 Non-Canonical NF-kB Pathway R-HSA-5668541	7/100	0.149481	0.574863	1.6464	3.12912	CD40;PSMA4;FBXW11;TNFRSF18;PSME1;TNF;NFKB2
IRS-mediated Signaling R-HSA-112399	4/47	0.149834	0.574863	2.03309	3.85925	PIGU;FGF7;FGF18;FGF4
PKMTs Methylate Histone Lysines R-HSA-3214841	4/47	0.149834	0.574863	2.03309	3.85925	KMT2E;KMT2A;NFKB2;EZH2
Sensory Perception Of Taste R-HSA-9717189	4/47	0.149834	0.574863	2.03309	3.85925	GNB1;SCNN1A;TAS2R14;ITPR3
Viral Messenger RNA Synthesis R-HSA-168325	4/47	0.149834	0.574863	2.03309	3.85925	NUP205;NUP133;NUP62;TPR
Synthesis Of DNA R-HSA-69239	8/119	0.151934	0.574863	1.57679	2.97117	ORC4;GINS2;POLA2;PSMA4;PCNA;PSME1;ANAPC5;RBX1
DNA Strand Elongation R-HSA-69190	3/31	0.153139	0.574863	2.34084	4.39237	GINS2;POLA2;PCNA
Negative Regulation Of FGFR4 Signaling R-HSA-5654733	3/31	0.153139	0.574863	2.34084	4.39237	MKNK1;FGF18;FGF4
CRMPs In Sema3A Signaling R-HSA-399956	2/16	0.153875	0.574863	3.11984	5.83913	DPYSL2;FYN
Cell-extracellular Matrix Interactions R-HSA-446353	2/16	0.153875	0.574863	3.11984	5.83913	FBLIM1;ILK
Heme Degradation R-HSA-189483	2/16	0.153875	0.574863	3.11984	5.83913	ABCC2;HMOX2
Plasma Lipoprotein Assembly R-HSA-8963898	2/16	0.153875	0.574863	3.11984	5.83913	PRKCA;ZDHHC8
Polo-like Kinase Mediated Events R-HSA-156711	2/16	0.153875	0.574863	3.11984	5.83913	CCNB2;CENPF
Rap1 Signaling R-HSA-392517	2/16	0.153875	0.574863	3.11984	5.83913	YWHAB;PRKCA
Regulation Of KIT Signaling R-HSA-1433559	2/16	0.153875	0.574863	3.11984	5.83913	PRKCA;FYN
Regulation Of Gene Expression In Late Stage (Branching Morphogenesis) Pancreatic Bud Precursor Cells R-HSA-210744	2/16	0.153875	0.574863	3.11984	5.83913	KAT2A;MAMLD1
NLRP3 Inflammasome R-HSA-844456	2/16	0.153875	0.574863	3.11984	5.83913	PYCARD;NFKB2
p75NTR Signals Via NF-kB R-HSA-193639	2/16	0.153875	0.574863	3.11984	5.83913	IRAK1;RIPK2
Regulation Of RAS By GAPs R-HSA-5658442	5/65	0.155755	0.578887	1.82177	3.38753	PSMA4;RASA4;PSME1;RASAL2;RBX1
Antiviral Mechanism By IFN-stimulated Genes R-HSA-1169410	6/83	0.156633	0.578887	1.70391	3.15879	NUP205;NUP133;NUP62;TPR;TRIM25;FLNB
Transport Of Mature Transcript To Cytoplasm R-HSA-72202	6/83	0.156633	0.578887	1.70391	3.15879	NUP205;NUP133;DDX39B;NUP62;TPR;SYMPK
Glycosaminoglycan Metabolism R-HSA-1630316	8/120	0.156981	0.578887	1.56263	2.89342	CEMIP;GLCE;B3GAT2;DSE;B3GALT6;HS3ST4;HS6ST2;B4GALT4
DNA Damage Bypass R-HSA-73893	4/48	0.158171	0.578887	1.98677	3.66377	PCNA;WDR48;TRIM25;RBX1
IRE1alpha Activates Chaperones R-HSA-381070	4/48	0.158171	0.578887	1.98677	3.66377	HSPA5;GOSR2;PLA2G4B;SEC31A
Inositol Phosphate Metabolism R-HSA-1483249	4/48	0.158171	0.578887	1.98677	3.66377	PLCB4;PPIP5K1;IP6K1;IP6K2
Transcriptional Regulation Of White Adipocyte Differentiation R-HSA-381340	6/84	0.162883	0.594386	1.68197	3.05232	MED12;HDAC3;NR2F2;TNF;MED29;MED17
Gluconeogenesis R-HSA-70263	3/32	0.163822	0.594386	2.26	4.08829	ENO2;SLC37A4;ENO3
Signaling By NOTCH2 R-HSA-1980145	3/32	0.163822	0.594386	2.26	4.08829	JAG1;CNTN1;MAMLD1
EPH-ephrin Mediated Repulsion Of Cells R-HSA-3928665	4/49	0.166674	0.59955	1.94252	3.48045	FYN;AP2B1;EPHA1;EPHB3
Signaling By ERBB2 R-HSA-1227986	4/49	0.166674	0.59955	1.94252	3.48045	PIGU;PRKCA;FYN;RHOA
Signaling By FGFR1 R-HSA-5654736	4/49	0.166674	0.59955	1.94252	3.48045	PIGU;MKNK1;FGF18;FGF4
Hedgehog On State R-HSA-5632684	6/85	0.169237	0.601657	1.6606	2.94998	PSMA4;KIF3A;GPR161;BOC;PSME1;RBX1
Acyl Chain Remodelling Of PI R-HSA-1482922	2/17	0.16958	0.601657	2.9117	5.16661	PLA2G4C;PLA2R1
Gastrin-CREB Signaling Pathway Via PKC And MAPK R-HSA-881907	2/17	0.16958	0.601657	2.9117	5.16661	RPS6KA2;PRKCA
SHC-mediated cascade:FGFR3 R-HSA-5654704	2/17	0.16958	0.601657	2.9117	5.16661	FGF18;FGF4
HDR Thru Homologous Recombination (HRR) R-HSA-5685942	5/67	0.170127	0.601657	1.76282	3.12232	RAD51B;BLM;MRE11;PCNA;ARTN
Sensory Processing Of Sound By Inner Hair Cells Of Cochlea R-HSA-9662360	5/67	0.170127	0.601657	1.76282	3.12232	SNAP25;CACNB2;KCNMB1;MYH9;FSCN2
CaM Pathway R-HSA-111997	3/33	0.174718	0.611488	2.18455	3.81113	PRKCA;ADCY1;ADCY6
FGFR2 Mutant Receptor Activation R-HSA-1839126	3/33	0.174718	0.611488	2.18455	3.81113	FGF7;FGF18;FGF4
Telomere C-strand (Lagging Strand) Synthesis R-HSA-174417	3/33	0.174718	0.611488	2.18455	3.81113	BLM;POLA2;PCNA
Toll-like Receptor Cascades R-HSA-168898	10/162	0.174857	0.611488	1.43955	2.51028	MAPK11;IRAK1;FBXW11;RIPK2;RPS6KA2;KCNH8;TLR7;TP53;RBSN;NFKB2
Aquaporin-mediated Transport R-HSA-445717	4/50	0.175335	0.611488	1.90019	3.30834	GNB1;PRKCA;ADCY1;ADCY6
PI5P, PP2A And IER3 Regulate PI3K/AKT Signaling R-HSA-6811558	7/106	0.183749	0.614849	1.54613	2.61943	PDGFRB;FGF7;PIGU;IRAK1;FGF18;FYN;FGF4
Diseases Of DNA Repair R-HSA-9675135	4/51	0.184146	0.614849	1.85967	3.1466	RAD51B;BLM;MRE11;ARTN
IRS-related Events Triggered By IGF1R R-HSA-2428928	4/51	0.184146	0.614849	1.85967	3.1466	PIGU;FGF7;FGF18;FGF4
Transport To Golgi And Subsequent Modification R-HSA-948021	10/164	0.184228	0.614849	1.42071	2.40324	DYNC1H1;TRAPPC2L;COG5;GOSR2;MGAT4B;SEC24C;COPZ1;ARF5;B4GALT4;SEC31A
Diseases Associated With O-glycosylation Of Proteins R-HSA-3906995	5/69	0.184991	0.614849	1.70755	2.8814	MUC1;ADAMTSL2;B3GLCT;LARGE1;ADAMTS7
Loss Of Nlp From Mitotic Centrosomes R-HSA-380259	5/69	0.184991	0.614849	1.70755	2.8814	DYNC1H1;CEP135;TUBB;CNTRL;PRKCA
Transcription Of HIV Genome R-HSA-167172	5/69	0.184991	0.614849	1.70755	2.8814	TAF7L;GTF2A1;TBP;ERCC2;TAF1
Activation Of SMO R-HSA-5635838	2/18	0.185535	0.614849	2.72957	4.598	KIF3A;BOC
Acyl Chain Remodelling Of PG R-HSA-1482925	2/18	0.185535	0.614849	2.72957	4.598	PLA2G4B;PLA2R1
Ephrin Signaling R-HSA-3928664	2/18	0.185535	0.614849	2.72957	4.598	FYN;EPHB3
JNK (c-Jun Kinases) Phosphorylation And Activation Mediated By Activated Human TAK1 R-HSA-450321	2/18	0.185535	0.614849	2.72957	4.598	IRAK1;RIPK2
Norepinephrine Neurotransmitter Release Cycle R-HSA-181430	2/18	0.185535	0.614849	2.72957	4.598	SNAP25;SLC22A2
Serotonin Neurotransmitter Release Cycle R-HSA-181429	2/18	0.185535	0.614849	2.72957	4.598	SNAP25;SYN3
TP53 Regulates Transcription Of Genes Involved In G2 Cell Cycle Arrest R-HSA-6804114	2/18	0.185535	0.614849	2.72957	4.598	PCNA;TP53
Lysosome Vesicle Biogenesis R-HSA-432720	3/34	0.185809	0.614849	2.11397	3.55789	HSPA8;AP4E1;AP1S1
Synthesis Of Bile Acids And Bile Salts R-HSA-192105	3/34	0.185809	0.614849	2.11397	3.55789	AMACR;OSBPL2;CYP8B1
Meiosis R-HSA-1500620	6/88	0.188898	0.614849	1.59959	2.6658	DIDO1;BLM;MRE11;ARTN;HSPA2;MLH3
PCP/CE Pathway R-HSA-4086400	6/88	0.188898	0.614849	1.59959	2.6658	PSMA4;FZD2;PSME1;PRKCA;AP2B1;RHOA
Regulation Of mRNA Stability By Proteins That Bind AU-rich Elements R-HSA-450531	6/88	0.188898	0.614849	1.59959	2.6658	HSPA8;MAPK11;PSMA4;YWHAB;PSME1;PRKCA
Anti-inflammatory Response Favoring Leishmania Infection R-HSA-9662851	10/165	0.188998	0.614849	1.41147	2.35153	GPR39;CALCA;GNB1;ITPR1;MYH9;PRKCA;ITPR3;FYN;ADCY1;ADCY6
Formation Of TC-NER Pre-Incision Complex R-HSA-6781823	4/52	0.193098	0.614849	1.82083	2.99446	UVSSA;ERCC2;COPS7A;RBX1
IGF1R Signaling Cascade R-HSA-2428924	4/52	0.193098	0.614849	1.82083	2.99446	PIGU;FGF7;FGF18;FGF4
RAB GEFs Exchange GTP For GDP On RABs R-HSA-8876198	6/89	0.19564	0.614849	1.58024	2.57812	RAB5B;TRAPPC2L;ALS2CL;DENND2B;DENND6B;RAB8A
Gene Silencing By RNA R-HSA-211000	7/108	0.195842	0.614849	1.51535	2.4707	NUP205;NUP133;TPR;NUP62;BCDIN3D;TDRD6;TARBP2
Ca-dependent Events R-HSA-111996	3/35	0.197078	0.614849	2.0478	3.32595	PRKCA;ADCY1;ADCY6
Impaired BRCA2 Binding To RAD51 R-HSA-9709570	3/35	0.197078	0.614849	2.0478	3.32595	BLM;MRE11;ARTN
Metabolism Of Steroid Hormones R-HSA-196071	3/35	0.197078	0.614849	2.0478	3.32595	HSD11B2;HSD17B2;CYP19A1
RUNX1 Interacts With Co-Factors Whose Precise Effect On RUNX1 Targets Is Not Known R-HSA-8939243	3/35	0.197078	0.614849	2.0478	3.32595	CBX6;SMARCC2;ACTL6A
Signaling By Rho GTPases R-HSA-194315	33/644	0.199769	0.614849	1.18463	1.90796	CYFIP2;ZWILCH;DOCK9;YWHAB;BUB1B;RASAL2;GOLGA3;TUBA1B;FGD5;SH3PXD2A;MYH11;HMOX2;IL32;PLEKHG4;DYNC1H1;JAG1;NUP133;FNBP1;CCDC115;PRKCA;MYO9A;RHOA;BUB1B-PAK6;FMNL3;MAPK11;CENPF;DDX39B;CDC42EP5;MYH9;KIF2C;PDE5A;MYL9;ITGB3BP
Abacavir Metabolism R-HSA-2161541	1/5	0.200865	0.614849	5.45634	8.7581	GUK1
Abacavir Transmembrane Transport R-HSA-2161517	1/5	0.200865	0.614849	5.45634	8.7581	SLC22A2
Activation Of NOXA And Translocation To Mitochondria R-HSA-111448	1/5	0.200865	0.614849	5.45634	8.7581	TP53
Disinhibition Of SNARE Formation R-HSA-114516	1/5	0.200865	0.614849	5.45634	8.7581	PRKCA
FBXW7 Mutants And NOTCH1 In Cancer R-HSA-2644605	1/5	0.200865	0.614849	5.45634	8.7581	RBX1
Formation Of Xylulose-5-Phosphate R-HSA-5661270	1/5	0.200865	0.614849	5.45634	8.7581	AKR1A1
G2/M DNA Replication Checkpoint R-HSA-69478	1/5	0.200865	0.614849	5.45634	8.7581	CCNB2
MET Activates PTPN11 R-HSA-8865999	1/5	0.200865	0.614849	5.45634	8.7581	PIGU
PKA-mediated Phosphorylation Of Key Metabolic Factors R-HSA-163358	1/5	0.200865	0.614849	5.45634	8.7581	PRKCA
Reelin Signaling Pathway R-HSA-8866376	1/5	0.200865	0.614849	5.45634	8.7581	FYN
Regulation Of Gene Expression In Endocrine-Committed (NEUROG3+) Progenitor Cells R-HSA-210746	1/5	0.200865	0.614849	5.45634	8.7581	NKX2-2
Sodium-coupled Phosphate Cotransporters R-HSA-427652	1/5	0.200865	0.614849	5.45634	8.7581	SLC34A1
Synthesis Of PIPs At ER Membrane R-HSA-1483248	1/5	0.200865	0.614849	5.45634	8.7581	PI4KA
Toxicity Of Botulinum Toxin Type D (botD) R-HSA-5250955	1/5	0.200865	0.614849	5.45634	8.7581	SV2C
Toxicity Of Botulinum Toxin Type F (botF) R-HSA-5250981	1/5	0.200865	0.614849	5.45634	8.7581	SV2C
FRS-mediated FGFR3 Signaling R-HSA-5654706	2/19	0.201689	0.614849	2.56887	4.11284	FGF18;FGF4
Metabolism Of Cofactors R-HSA-8978934	2/19	0.201689	0.614849	2.56887	4.11284	GCHFR;COQ3
Na+/Cl- Dependent Neurotransmitter Transporters R-HSA-442660	2/19	0.201689	0.614849	2.56887	4.11284	SLC22A2;SLC6A1
Processive Synthesis On C-strand Of Telomere R-HSA-174414	2/19	0.201689	0.614849	2.56887	4.11284	BLM;PCNA
Regulation Of TP53 Activity Thru Methylation R-HSA-6804760	2/19	0.201689	0.614849	2.56887	4.11284	TTC5;TP53
SHC-mediated cascade:FGFR4 R-HSA-5654719	2/19	0.201689	0.614849	2.56887	4.11284	FGF18;FGF4
Signaling By B Cell Receptor (BCR) R-HSA-983705	7/109	0.202003	0.614849	1.50042	2.39987	PSMA4;FBXW11;PSME1;ITPR1;ORAI1;ITPR3;FYN
Insulin Receptor Signaling Cascade R-HSA-74751	4/53	0.202182	0.614849	1.78358	2.8512	PIGU;FGF7;FGF18;FGF4
Signaling By Type 1 Insulin-like Growth Factor 1 Receptor (IGF1R) R-HSA-2404192	4/53	0.202182	0.614849	1.78358	2.8512	PIGU;FGF7;FGF18;FGF4
HIV Life Cycle R-HSA-162587	9/149	0.207762	0.628014	1.40592	2.20921	TAF7L;GTF2A1;NUP205;TBP;NUP133;TPR;NUP62;ERCC2;TAF1
AURKA Activation By TPX2 R-HSA-8854518	5/72	0.208123	0.628014	1.63084	2.55981	DYNC1H1;CEP135;TUBB;CNTRL;PRKCA
Signaling By FGFR2 R-HSA-5654738	5/72	0.208123	0.628014	1.63084	2.55981	PIGU;FGF7;MKNK1;FGF18;FGF4
HSF1-dependent Transactivation R-HSA-3371571	3/36	0.208507	0.628014	1.98565	3.11307	HSPA8;COL4A6;HSPA2
Separation Of Sister Chromatids R-HSA-2467813	10/170	0.213644	0.634653	1.367	2.10988	DYNC1H1;CENPF;PSMA4;NUP133;ZWILCH;PSME1;BUB1B;ANAPC5;KIF2C;ITGB3BP
CD209 (DC-SIGN) Signaling R-HSA-5621575	2/20	0.217994	0.634653	2.42603	3.69555	PRKCA;FYN
Lagging Strand Synthesis R-HSA-69186	2/20	0.217994	0.634653	2.42603	3.69555	POLA2;PCNA
Nef-mediated Downmodulation Of Cell Surface Receptors By Recruitment To Clathrin Adapters R-HSA-164938	2/20	0.217994	0.634653	2.42603	3.69555	AP1S1;AP2B1
Receptor-type Tyrosine-Protein Phosphatases R-HSA-388844	2/20	0.217994	0.634653	2.42603	3.69555	PTPRD;SLITRK2
Syndecan Interactions R-HSA-3000170	2/20	0.217994	0.634653	2.42603	3.69555	PRKCA;ITGAV
DNA Damage Recognition In GG-NER R-HSA-5696394	3/37	0.220078	0.634653	1.92714	2.91726	ACTL6A;COPS7A;RBX1
Defective B3GALTL Causes PpS R-HSA-5083635	3/37	0.220078	0.634653	1.92714	2.91726	ADAMTSL2;B3GLCT;ADAMTS7
HDR Thru Single Strand Annealing (SSA) R-HSA-5685938	3/37	0.220078	0.634653	1.92714	2.91726	BLM;MRE11;ARTN
Degradation Of DVL R-HSA-4641258	4/55	0.220713	0.634653	1.71345	2.58884	PSMA4;PSME1;DACT1;RBX1
Golgi Associated Vesicle Biogenesis R-HSA-432722	4/55	0.220713	0.634653	1.71345	2.58884	HSPA8;AP4E1;AP1S1;SNX5
Signaling By ALK Fusions And Activated Point Mutants R-HSA-9725370	4/55	0.220713	0.634653	1.71345	2.58884	TPR;MYH9;RBX1;SEC31A
G Alpha (Q) Signaling Events R-HSA-416476	12/212	0.221674	0.634653	1.31258	1.97746	PTGFR;GPR39;PRKCH;PLCB4;RIPK2;TBXA2R;RPS6KA2;GNB1;ITPR1;PRKCA;ITPR3;NMUR1
RNA Polymerase II Transcribes snRNA Genes R-HSA-6807505	5/74	0.22404	0.634653	1.5834	2.36865	GTF2A1;TBP;PCF11;NABP2;RPAP2
Transport Of Mature mRNA Derived From An Intron-Containing Transcript R-HSA-159236	5/74	0.22404	0.634653	1.5834	2.36865	NUP205;NUP133;DDX39B;NUP62;TPR
Negative Regulation Of PI3K/AKT Network R-HSA-199418	7/113	0.227363	0.634653	1.44349	2.13811	PDGFRB;FGF7;PIGU;IRAK1;FGF18;FYN;FGF4
ER To Golgi Anterograde Transport R-HSA-199977	8/133	0.229135	0.634653	1.39916	2.06159	DYNC1H1;TRAPPC2L;COG5;GOSR2;SEC24C;COPZ1;ARF5;SEC31A
Chemokine Receptors Bind Chemokines R-HSA-380108	4/56	0.230142	0.634653	1.68041	2.46862	CXCL10;CNOT6;CCL21;CCL19
Meiotic Recombination R-HSA-912446	4/56	0.230142	0.634653	1.68041	2.46862	BLM;MRE11;ARTN;MLH3
Fanconi Anemia Pathway R-HSA-6783310	3/38	0.231774	0.634653	1.87198	2.73683	WDR48;CENPX;UBE2T
HSP90 Chaperone Cycle For Steroid Hormone Receptors (SHR) In Presence Of Ligand R-HSA-3371497	3/38	0.231774	0.634653	1.87198	2.73683	DYNC1H1;HSPA8;HSPA2
O-glycosylation Of TSR Domain-Containing Proteins R-HSA-5173214	3/38	0.231774	0.634653	1.87198	2.73683	ADAMTSL2;B3GLCT;ADAMTS7
HDR Thru Homologous Recombination (HRR) Or Single Strand Annealing (SSA) R-HSA-5693567	7/114	0.233869	0.634653	1.42993	2.07768	RAD51B;MDC1;BLM;MRE11;PCNA;ARTN;SIRT6
ER Quality Control Compartment (ERQC) R-HSA-901032	2/21	0.234405	0.634653	2.29823	3.33404	RNF139;AMFR
FRS-mediated FGFR4 Signaling R-HSA-5654712	2/21	0.234405	0.634653	2.29823	3.33404	FGF18;FGF4
Inactivation Of APC/C Via Direct Inhibition Of APC/C Complex R-HSA-141430	2/21	0.234405	0.634653	2.29823	3.33404	BUB1B;ANAPC5
Inflammasomes R-HSA-622312	2/21	0.234405	0.634653	2.29823	3.33404	PYCARD;NFKB2
Mitochondrial tRNA Aminoacylation R-HSA-379726	2/21	0.234405	0.634653	2.29823	3.33404	MARS2;EARS2
NOTCH2 Activation And Transmission Of Signal To Nucleus R-HSA-2979096	2/21	0.234405	0.634653	2.29823	3.33404	JAG1;CNTN1
PCNA-Dependent Long Patch Base Excision Repair R-HSA-5651801	2/21	0.234405	0.634653	2.29823	3.33404	PCNA;APEX1
PI-3K cascade:FGFR1 R-HSA-5654689	2/21	0.234405	0.634653	2.29823	3.33404	PIGU;FGF4
Synthesis, Secretion, And Inactivation Of Glucagon-like Peptide-1 (GLP-1) R-HSA-381771	2/21	0.234405	0.634653	2.29823	3.33404	PCSK1;GNB1
TP53 Regulates Transcription Of Additional Cell Cycle Genes With Uncertain Roles In P53 Pathway R-HSA-6804115	2/21	0.234405	0.634653	2.29823	3.33404	CNOT6;TP53
Unblocking Of NMDA Receptors, Glutamate Binding And Activation R-HSA-438066	2/21	0.234405	0.634653	2.29823	3.33404	GRIA3;GRIA4
VxPx Cargo-Targeting To Cilium R-HSA-5620916	2/21	0.234405	0.634653	2.29823	3.33404	RHO;RAB8A
Activated NTRK2 Signals Thru FYN R-HSA-9032500	1/6	0.235915	0.634653	4.36484	6.30406	FYN
Activated NTRK2 Signals Thru PI3K R-HSA-9028335	1/6	0.235915	0.634653	4.36484	6.30406	PIGU
Acyl Chain Remodeling Of CL R-HSA-1482798	1/6	0.235915	0.634653	4.36484	6.30406	TAFAZZIN
CLEC7A/inflammasome Pathway R-HSA-5660668	1/6	0.235915	0.634653	4.36484	6.30406	PYCARD
Choline Catabolism R-HSA-6798163	1/6	0.235915	0.634653	4.36484	6.30406	SLC44A1
Conjugation Of Benzoate With Glycine R-HSA-177135	1/6	0.235915	0.634653	4.36484	6.30406	GLYATL1
FLT3 Signaling Thru SRC Family Kinases R-HSA-9706374	1/6	0.235915	0.634653	4.36484	6.30406	FYN
MET Activates PI3K/AKT Signaling R-HSA-8851907	1/6	0.235915	0.634653	4.36484	6.30406	PIGU
Molybdenum Cofactor Biosynthesis R-HSA-947581	1/6	0.235915	0.634653	4.36484	6.30406	MOCOS
NADE Modulates Death Signaling R-HSA-205025	1/6	0.235915	0.634653	4.36484	6.30406	CASP2
SUMO Is Transferred From E1 To E2 (UBE2I, UBC9) R-HSA-3065678	1/6	0.235915	0.634653	4.36484	6.30406	SAE1
Sensory Perception Of Salty Taste R-HSA-9730628	1/6	0.235915	0.634653	4.36484	6.30406	SCNN1A
TNFR1-mediated Ceramide Production R-HSA-5626978	1/6	0.235915	0.634653	4.36484	6.30406	TNF
p75NTR Negatively Regulates Cell Cycle Via SC1 R-HSA-193670	1/6	0.235915	0.634653	4.36484	6.30406	HDAC3
rRNA Modification In Mitochondrion R-HSA-6793080	1/6	0.235915	0.634653	4.36484	6.30406	TFB1M
Vesicle-mediated Transport R-HSA-5653656	32/637	0.23701	0.636237	1.15913	1.66875	RAB5B;YWHAB;GOSR2;AP4E1;COPS7A;CD3D;GJC2;ALS2CL;KIF5C;KIF3A;AP1S1;SNX5;RAB8A;SEC31A;DYNC1H1;HSPA8;TRAPPC2L;FNBP1;COG5;DENND2B;AP2B1;PRKAB1;COPZ1;NECAP2;TBC1D7;MYH9;KIF2C;DENND6B;KIF20B;PAFAH1B3;SEC24C;ARF5
Cytokine Signaling In Immune System R-HSA-1280215	35/702	0.238453	0.63875	1.15019	1.64888	SNAP25;IFNA4;NUP205;CD40;GATA3;TNF;MUC1;IRAK1;RPS6KA2;TPR;NUP62;TRIM25;FLNB;FYN;CCL19;IP6K2;SOCS5;IL32;HSPA8;NUP133;RIPK2;FBXW11;IFNA17;KCNH8;TNFRSF18;PRKCA;RBX1;NFKB2;CXCL10;MAPK11;PSMA4;PSME1;TRIM38;TP53;IFNA10
tRNA Processing In Nucleus R-HSA-6784531	4/57	0.239669	0.640643	1.64862	2.35505	NUP205;NUP133;NUP62;TPR
NGF-stimulated Transcription R-HSA-9031628	3/39	0.24358	0.649719	1.81989	2.57025	KCNH8;ID3;CHD4
Signal Transduction R-HSA-162582	115/2465	0.248274	0.655313	1.07717	1.50074	CYFIP2;ZWILCH;BUB1B;TNF;FGF4;GOLGA3;FGF7;RPS6KA2;STMN1;ADORA1;VPS35;PDGFRB;PRKCH;FNBP1;KCNH8;TAS2R14;PRKCA;PRKAB1;RBX1;DDX39B;GPR161;PSME1;COL4A5;MYL9;TP53;PTGFR;CALCA;ITPR1;ITPR3;GATA3;RASAL2;MTMR4;PORCN;IRAK1;KIF3A;TBXA2R;MYH11;HMOX2;CBX6;JAG1;FZD2;CXCL10;CNOT6;ARTN;FGF18;GNB1;RANBP10;CNTN1;ID3;NMUR1;EZH2;GPSM2;PIGU;YWHAB;DOCK9;CHD4;GRM2;TUBA1B;SH3PXD2A;HEY2;BOC;CASP2;ITGAV;DACT1;PTCRA;GPR39;PL…
Transcription-Coupled Nucleotide Excision Repair (TC-NER) R-HSA-6781827	5/77	0.248557	0.655313	1.51719	2.11205	PCNA;UVSSA;ERCC2;COPS7A;RBX1
Late SARS-CoV-2 Infection Events R-HSA-9772573	4/58	0.249284	0.655313	1.61801	2.24767	DAD1;MGAT4B;STT3A;ZDHHC8
Metabolism Of Polyamines R-HSA-351202	4/58	0.249284	0.655313	1.61801	2.24767	PSMA4;NPRL2;PSME1;AZIN1
NIK To Noncanonical NF-kB Signaling R-HSA-5676590	4/58	0.249284	0.655313	1.61801	2.24767	PSMA4;FBXW11;PSME1;NFKB2
mRNA 3-End Processing R-HSA-72187	4/58	0.249284	0.655313	1.61801	2.24767	CPSF6;DDX39B;PCF11;SYMPK
Cytosolic Sulfonation Of Small Molecules R-HSA-156584	2/22	0.250883	0.655313	2.1832	3.01886	SULT1A1;SULT1A2
E2F Mediated Regulation Of DNA Replication R-HSA-113510	2/22	0.250883	0.655313	2.1832	3.01886	ORC4;POLA2
Nephrin Family Interactions R-HSA-373753	2/22	0.250883	0.655313	2.1832	3.01886	KIRREL2;FYN
Signaling By NODAL R-HSA-1181150	2/22	0.250883	0.655313	2.1832	3.01886	ACVR1B;ACVR2A
Degradation Of GLI1 By Proteasome R-HSA-5610780	4/59	0.258981	0.657816	1.5885	2.14607	PSMA4;PSME1;PRKCA;RBX1
Degradation Of GLI2 By Proteasome R-HSA-5610783	4/59	0.258981	0.657816	1.5885	2.14607	PSMA4;PSME1;PRKCA;RBX1
GLI3 Is Processed To GLI3R By Proteasome R-HSA-5610785	4/59	0.258981	0.657816	1.5885	2.14607	PSMA4;PSME1;PRKCA;RBX1
Role Of GTSE1 In G2/M Progression After G2 Checkpoint R-HSA-8852276	4/59	0.258981	0.657816	1.5885	2.14607	CCNB2;PSMA4;PSME1;TP53
Interferon Signaling R-HSA-913531	11/200	0.26313	0.657816	1.27249	1.69891	IFNA4;NUP205;NUP133;IFNA17;TPR;NUP62;TRIM25;FLNB;TRIM38;IFNA10;IP6K2
Processing Of Capped Intron-Containing Pre-mRNA R-HSA-72203	13/242	0.26541	0.657816	1.24142	1.64671	HSPA8;NUP205;PPIL1;CPSF6;NUP133;DDX39B;HNRNPUL1;PCF11;PRPF3;TPR;NUP62;SYMPK;RBM5
Death Receptor Signaling R-HSA-73887	8/139	0.265857	0.657816	1.33466	1.76815	LINGO1;HDAC3;IRAK1;RIPK2;CASP2;TNF;RHOA;ITGB3BP
Homology Directed Repair R-HSA-5693538	7/119	0.267257	0.657816	1.36573	1.80214	RAD51B;MDC1;BLM;MRE11;PCNA;ARTN;SIRT6
SLC Transporter Disorders R-HSA-5619102	6/99	0.267372	0.657816	1.40958	1.8594	NUP205;HEPH;NUP133;SLC34A1;TPR;NUP62
Dopamine Neurotransmitter Release Cycle R-HSA-212676	2/23	0.267388	0.657816	2.07913	2.74248	SNAP25;SYN3
Signaling By NTRK2 (TRKB) R-HSA-9006115	2/23	0.267388	0.657816	2.07913	2.74248	PIGU;FYN
Triglyceride Catabolism R-HSA-163560	2/23	0.267388	0.657816	2.07913	2.74248	FABP6;PRKCA
Dual Incision In GG-NER R-HSA-5696400	3/41	0.267456	0.657816	1.72393	2.27351	PCNA;ERCC2;RBX1
MTOR Signaling R-HSA-165159	3/41	0.267456	0.657816	1.72393	2.27351	PRKAA1;YWHAB;PRKAB1
Non-integrin membrane-ECM Interactions R-HSA-3000171	3/41	0.267456	0.657816	1.72393	2.27351	NRXN1;ITGAV;PRKCA
Regulation Of Beta-Cell Development R-HSA-186712	3/41	0.267456	0.657816	1.72393	2.27351	KAT2A;MAMLD1;NKX2-2
Sensory Perception Of Sweet, Bitter, And Umami (Glutamate) Taste R-HSA-9717207	3/41	0.267456	0.657816	1.72393	2.27351	GNB1;TAS2R14;ITPR3
Recruitment And ATM-mediated Phosphorylation Of Repair And Signal Proteins At DNA Double Strand Breaks R-HSA-5693565	4/60	0.268749	0.657816	1.56006	2.04988	MDC1;MRE11;ARTN;TP53
ARMS-mediated Activation R-HSA-170984	1/7	0.26943	0.657816	3.63718	4.76996	YWHAB
Activation Of NIMA Kinases NEK9, NEK6, NEK7 R-HSA-2980767	1/7	0.26943	0.657816	3.63718	4.76996	CCNB2
Attachment Of GPI Anchor To uPAR R-HSA-162791	1/7	0.26943	0.657816	3.63718	4.76996	PIGU
CREB Phosphorylation R-HSA-199920	1/7	0.26943	0.657816	3.63718	4.76996	RPS6KA2
Constitutive Signaling By NOTCH1 t(7;9)(NOTCH1:M1580 K2555) Translocation Mutant R-HSA-2660826	1/7	0.26943	0.657816	3.63718	4.76996	JAG1
DEx/H-box Helicases Activate Type I IFN And Inflammatory Cytokines Production R-HSA-3134963	1/7	0.26943	0.657816	3.63718	4.76996	NFKB2
FGFR3b Ligand Binding And Activation R-HSA-190371	1/7	0.26943	0.657816	3.63718	4.76996	FGF18
GLI Proteins Bind Promoters Of Hh Responsive Genes To Promote Transcription R-HSA-5635851	1/7	0.26943	0.657816	3.63718	4.76996	BOC
Highly Sodium Permeable Postsynaptic Acetylcholine Nicotinic Receptors R-HSA-629587	1/7	0.26943	0.657816	3.63718	4.76996	CHRNG
IkBA Variant Leads To EDA-ID R-HSA-5603029	1/7	0.26943	0.657816	3.63718	4.76996	NFKB2
Loss Of MECP2 Binding Ability To NCoR/SMRT Complex R-HSA-9022537	1/7	0.26943	0.657816	3.63718	4.76996	HDAC3
Nef Mediated CD8 Down-regulation R-HSA-182218	1/7	0.26943	0.657816	3.63718	4.76996	AP2B1
RSK Activation R-HSA-444257	1/7	0.26943	0.657816	3.63718	4.76996	RPS6KA2
RUNX3 Regulates CDKN1A Transcription R-HSA-8941855	1/7	0.26943	0.657816	3.63718	4.76996	TP53
Zinc Efflux And Compartmentalization By SLC30 Family R-HSA-435368	1/7	0.26943	0.657816	3.63718	4.76996	SLC30A3
Intra-Golgi And Retrograde Golgi-to-ER Traffic R-HSA-6811442	10/181	0.271953	0.657816	1.27832	1.66454	DYNC1H1;KIF5C;COG5;KIF3A;GOSR2;KIF2C;KIF20B;PAFAH1B3;COPZ1;ARF5
Toll Like Receptor 4 (TLR4) Cascade R-HSA-166016	8/140	0.272142	0.657816	1.32448	1.72372	MAPK11;IRAK1;FBXW11;RIPK2;RPS6KA2;KCNH8;TP53;NFKB2
COPI-mediated Anterograde Transport R-HSA-6807878	5/80	0.273714	0.657816	1.45627	1.88685	DYNC1H1;COG5;GOSR2;COPZ1;ARF5
Processing Of DNA Double-Strand Break Ends R-HSA-5693607	5/80	0.273714	0.657816	1.45627	1.88685	MDC1;BLM;MRE11;ARTN;SIRT6
RNA Polymerase II Pre-transcription Events R-HSA-674695	5/80	0.273714	0.657816	1.45627	1.88685	TAF7L;GTF2A1;TBP;ERCC2;TAF1
Recruitment Of NuMA To Mitotic Centrosomes R-HSA-380320	5/80	0.273714	0.657816	1.45627	1.88685	DYNC1H1;CEP135;TUBB;CNTRL;PRKCA
Cell-Cell Communication R-HSA-1500931	7/120	0.274089	0.657816	1.35358	1.75194	CLDN10;KIRREL2;FBLIM1;ILK;FYN;CD47;PLEC
S Phase R-HSA-69242	9/161	0.275386	0.657816	1.2941	1.66886	ORC4;GINS2;POLA2;PSMA4;PCNA;PSME1;ANAPC5;CDC25B;RBX1
DNA Double Strand Break Response R-HSA-5693606	4/61	0.278582	0.657816	1.53261	1.95874	MDC1;MRE11;ARTN;TP53
Dectin-1 Mediated Noncanonical NF-kB Signaling R-HSA-5607761	4/61	0.278582	0.657816	1.53261	1.95874	PSMA4;FBXW11;PSME1;NFKB2
tRNA Modification In Nucleus And Cytosol R-HSA-6782315	3/42	0.279496	0.657816	1.67963	2.14114	EPRS1;LAGE3;OSGEP
Centrosome Maturation R-HSA-380287	5/81	0.282218	0.657816	1.43703	1.81796	DYNC1H1;CEP135;TUBB;CNTRL;PRKCA
DDX58/IFIH1-mediated Induction Of Interferon-Alpha/Beta R-HSA-168928	5/81	0.282218	0.657816	1.43703	1.81796	IFNA4;IFNA17;TRIM25;IFNA10;NFKB2
Cytosolic tRNA Aminoacylation R-HSA-379716	2/24	0.283889	0.657816	1.98452	2.49885	AARS1;EPRS1
DARPP-32 Events R-HSA-180024	2/24	0.283889	0.657816	1.98452	2.49885	PDE4D;PRKCA
Defective Intrinsic Pathway For Apoptosis R-HSA-9734009	2/24	0.283889	0.657816	1.98452	2.49885	TP53;CDC25B
Incretin Synthesis, Secretion, And Inactivation R-HSA-400508	2/24	0.283889	0.657816	1.98452	2.49885	PCSK1;GNB1
MicroRNA (miRNA) Biogenesis R-HSA-203927	2/24	0.283889	0.657816	1.98452	2.49885	BCDIN3D;TARBP2
Other Interleukin Signaling R-HSA-449836	2/24	0.283889	0.657816	1.98452	2.49885	IL32;SNAP25
RHO GTPases Activate NADPH Oxidases R-HSA-5668599	2/24	0.283889	0.657816	1.98452	2.49885	MAPK11;PRKCA
RUNX2 Regulates Osteoblast Differentiation R-HSA-8940973	2/24	0.283889	0.657816	1.98452	2.49885	HDAC3;HEY2
Synthesis Of Bile Acids And Bile Salts Via 7Alpha-Hydroxycholesterol R-HSA-193368	2/24	0.283889	0.657816	1.98452	2.49885	AMACR;CYP8B1
Thromboxane Signaling Thru TP Receptor R-HSA-428930	2/24	0.283889	0.657816	1.98452	2.49885	TBXA2R;GNB1
Transcriptional Regulation By RUNX1 R-HSA-8878171	11/204	0.284041	0.657816	1.24586	1.56808	KMT2E;CBX6;TCF7L1;SMARCC2;PSMA4;KMT2A;TNFRSF18;ACTL6A;PSME1;GATA3;MYL9
Citric Acid (TCA) Cycle And Respiratory Electron Transport R-HSA-1428517	9/163	0.287248	0.657816	1.27716	1.59315	CS;PLPP6;PCDHGA5;NDUFB7;SCO2;IDH3G;SUCLG2;UQCR11;ATP5F1D
Rab Regulation Of Trafficking R-HSA-9007101	7/122	0.287883	0.657816	1.3299	1.65599	RAB5B;TRAPPC2L;ALS2CL;DENND2B;TBC1D7;DENND6B;RAB8A
Pre-NOTCH Transcription And Translation R-HSA-1912408	4/62	0.28847	0.657816	1.5061	1.87233	KAT2A;SIRT6;TP53;MAMLD1
RAB Geranylgeranylation R-HSA-8873719	4/62	0.28847	0.657816	1.5061	1.87233	RAB5B;RAB34;RAB22A;RAB8A
Signaling By BRAF And RAF1 Fusions R-HSA-6802952	4/62	0.28847	0.657816	1.5061	1.87233	CLCN6;YWHAB;TRAK1;SND1
PIP3 Activates AKT Signaling R-HSA-1257604	14/268	0.288701	0.657816	1.20513	1.4972	PDGFRB;PIGU;CBX6;HDAC3;CHD4;FGF4;FGF7;PSMA4;IRAK1;FGF18;PSME1;FYN;TP53;EZH2
Metabolism Of Proteins R-HSA-392499	88/1890	0.289108	0.657816	1.07207	1.33039	MDC1;PCSK1;PIGU;USP37;WDR48;TPGS1;RAB22A;DCAF7;GALNT10;GMPPB;TUBA1B;DMBT1;KIF5C;NUP62;ADAMTSL2;GMPPA;TRIM25;LARGE1;EARS2;RAB8A;FBXO9;ADAMTS7;ALG8;USP48;TRAPPC2L;NUP133;USP5;RIPK2;FBXW11;COG5;SLC34A1;TUBB;MARS2;ACTL6A;VASH2;COMMD3;COPZ1;RHOA;RBX1;KAT2A;PSMA4;DAD1;RAB34;PSME1;TP53;ARF5;B4GALT4;BLM;AARS1;CALCA;NUP205;RAB5B;PCNA;HDAC3;GOSR2;B3GLCT;COPS7A;GATA3;TTL;MUC1;RNF139;TPR;SOCS5;SEC31A;SNCA;NO…
Leishmania Infection R-HSA-9658195	13/247	0.289255	0.657816	1.21457	1.50661	CYFIP2;GPR39;CALCA;ITPR1;PRKCA;ITPR3;ADCY1;ADCY6;NFKB2;PYCARD;GNB1;MYH9;FYN
Global Genome Nucleotide Excision Repair (GG-NER) R-HSA-5696399	5/82	0.290771	0.657816	1.4183	1.7519	PCNA;ACTL6A;ERCC2;COPS7A;RBX1
Diseases Of Glycosylation R-HSA-3781865	8/143	0.291234	0.657816	1.29484	1.59735	ALG8;MUC1;ADAMTSL2;B3GLCT;B3GALT6;LARGE1;GALK1;ADAMTS7
Cellular Senescence R-HSA-2559583	9/165	0.299243	0.657816	1.26066	1.52098	MAPK11;CBX6;MRE11;ARTN;RPS6KA2;E2F2;ANAPC5;TP53;EZH2
Cell Recruitment (Pro-Inflammatory Response) R-HSA-9664424	2/25	0.300352	0.657816	1.89814	2.28308	PYCARD;NFKB2
G Beta:Gamma Signaling Thru PI3Kgamma R-HSA-392451	2/25	0.300352	0.657816	1.89814	2.28308	GNB1;RHOA
Polymerase Switching On C-strand Of Telomere R-HSA-174411	2/25	0.300352	0.657816	1.89814	2.28308	POLA2;PCNA
Resolution Of AP Sites Via Multiple-Nucleotide Patch Replacement Pathway R-HSA-110373	2/25	0.300352	0.657816	1.89814	2.28308	PCNA;APEX1
TRAF6 Mediated NF-kB Activation R-HSA-933542	2/25	0.300352	0.657816	1.89814	2.28308	TRIM25;NFKB2
TRP Channels R-HSA-3295583	2/25	0.300352	0.657816	1.89814	2.28308	TRPV1;TRPC4AP
Alpha-defensins R-HSA-1462054	1/8	0.301477	0.657816	3.11742	3.73797	DEFA4
Binding Of TCF/LEF:CTNNB1 To Target Gene Promoters R-HSA-4411364	1/8	0.301477	0.657816	3.11742	3.73797	TCF7L1
CDC6 Association With ORC:origin Complex R-HSA-68689	1/8	0.301477	0.657816	3.11742	3.73797	ORC4
Ca2+ Activated K+ Channels R-HSA-1296052	1/8	0.301477	0.657816	3.11742	3.73797	KCNMB1
Conjugation Of Salicylate With Glycine R-HSA-177128	1/8	0.301477	0.657816	3.11742	3.73797	GLYATL1
Cross-presentation Of Particulate Exogenous Antigens (Phagosomes) R-HSA-1236973	1/8	0.301477	0.657816	3.11742	3.73797	ITGAV
DNA Replication Initiation R-HSA-68952	1/8	0.301477	0.657816	3.11742	3.73797	POLA2
EGFR Transactivation By Gastrin R-HSA-2179392	1/8	0.301477	0.657816	3.11742	3.73797	PRKCA
Gain-of-function MRAS Complexes Activate RAF Signaling R-HSA-9726842	1/8	0.301477	0.657816	3.11742	3.73797	YWHAB
Ligand-receptor Interactions R-HSA-5632681	1/8	0.301477	0.657816	3.11742	3.73797	BOC
Metabolism Of Ingested SeMet, Sec, MeSec Into H2Se R-HSA-2408508	1/8	0.301477	0.657816	3.11742	3.73797	SCLY
Myoclonic Epilepsy Of Lafora R-HSA-3785653	1/8	0.301477	0.657816	3.11742	3.73797	GYG1
Nef Mediated CD4 Down-regulation R-HSA-167590	1/8	0.301477	0.657816	3.11742	3.73797	AP2B1
Nef And Signal Transduction R-HSA-164944	1/8	0.301477	0.657816	3.11742	3.73797	FYN
POLB-Dependent Long Patch Base Excision Repair R-HSA-110362	1/8	0.301477	0.657816	3.11742	3.73797	APEX1
ROBO Receptors Bind AKAP5 R-HSA-9010642	1/8	0.301477	0.657816	3.11742	3.73797	PRKCA
RUNX3 Regulates WNT Signaling R-HSA-8951430	1/8	0.301477	0.657816	3.11742	3.73797	TCF7L1
Sema4D Mediated Inhibition Of Cell Attachment And Migration R-HSA-416550	1/8	0.301477	0.657816	3.11742	3.73797	RHOA
Synthesis Of Ketone Bodies R-HSA-77111	1/8	0.301477	0.657816	3.11742	3.73797	BDH2
Synthesis Of UDP-N-acetyl-glucosamine R-HSA-446210	1/8	0.301477	0.657816	3.11742	3.73797	NAGK
Ubiquinol Biosynthesis R-HSA-2142789	1/8	0.301477	0.657816	3.11742	3.73797	COQ3
Gap-filling DNA Repair Synthesis And Ligation In TC-NER R-HSA-6782210	4/64	0.308382	0.669839	1.45575	1.71256	PCNA;UVSSA;ERCC2;RBX1
Signaling By WNT R-HSA-195721	15/294	0.310436	0.669839	1.17531	1.37485	TCF7L1;FZD2;ITPR1;PRKCA;ITPR3;AP2B1;RHOA;RBX1;PORCN;PSMA4;GNB1;PSME1;VPS35;PDE6A;DACT1
M Phase R-HSA-68886	19/380	0.31082	0.669839	1.1509	1.34488	DYNC1H1;NUP205;CEP135;NUP133;ZWILCH;TUBB;BUB1B;PRKCA;CCNB2;TUBA1B;CENPF;PSMA4;CNTRL;TPR;NUP62;PSME1;KIF2C;ANAPC5;ITGB3BP
PI3K/AKT Signaling In Cancer R-HSA-2219528	6/105	0.313188	0.669839	1.32373	1.53679	PDGFRB;FGF7;PIGU;FGF18;FYN;FGF4
Interleukin-10 Signaling R-HSA-6783783	3/45	0.31585	0.669839	1.55941	1.7972	CXCL10;CCL19;TNF
TBC/RABGAPs R-HSA-8854214	3/45	0.31585	0.669839	1.55941	1.7972	RAB5B;TBC1D7;RAB8A
GAG Synthesis Requires Tetrasaccharide Linker Sequence R-HSA-1971475	2/26	0.31675	0.669839	1.81895	2.09114	B3GAT2;B3GALT6
APC-Cdc20 Mediated Degradation Of Nek2A R-HSA-179409	2/26	0.31675	0.669839	1.81895	2.09114	BUB1B;ANAPC5
Calnexin/calreticulin Cycle R-HSA-901042	2/26	0.31675	0.669839	1.81895	2.09114	RNF139;AMFR
Formation Of Tubulin Folding Intermediates By CCT/TriC R-HSA-389960	2/26	0.31675	0.669839	1.81895	2.09114	TUBA1B;TUBB
Metal Ion SLC Transporters R-HSA-425410	2/26	0.31675	0.669839	1.81895	2.09114	HEPH;SLC30A3
N-glycan Antennae Elongation In medial/trans-Golgi R-HSA-975576	2/26	0.31675	0.669839	1.81895	2.09114	MGAT4B;B4GALT4
Role Of Phospholipids In Phagocytosis R-HSA-2029485	2/26	0.31675	0.669839	1.81895	2.09114	ITPR1;ITPR3
WNT Ligand Biogenesis And Trafficking R-HSA-3238698	2/26	0.31675	0.669839	1.81895	2.09114	PORCN;VPS35
Dual Incision In TC-NER R-HSA-6782135	4/65	0.31839	0.669839	1.43181	1.63867	PCNA;UVSSA;ERCC2;RBX1
Mitochondrial Protein Import R-HSA-1268020	4/65	0.31839	0.669839	1.43181	1.63867	CS;TAFAZZIN;IDH3G;FXN
Glycerophospholipid Biosynthesis R-HSA-1483206	7/127	0.323011	0.669839	1.27415	1.43988	OSBPL5;SLC44A1;TAFAZZIN;PLA2G4B;PLA2G4C;PLA2R1;PLA1A
Adaptive Immune System R-HSA-1280218	35/733	0.324817	0.669839	1.09726	1.23386	CD40;YWHAB;ITPR1;ITPR3;ICAM4;CD3D;HERC1;KIF5C;KIF3A;AP1S1;TRIM69;ITGAV;FYN;SLAMF6;FBXO9;SEC31A;DYNC1H1;HSPA5;RIPK2;BTN2A1;FBXW11;PRKCA;AP2B1;UBAC1;RBX1;TAPBP;PSMA4;TRIM39;PSME1;ASB6;ORAI1;TRIM36;ANAPC5;KIF2C;SEC24C
Signaling By FGFR R-HSA-190236	5/86	0.325384	0.669839	1.34797	1.51343	PIGU;FGF7;MKNK1;FGF18;FGF4
Transport Of Bile Salts And Organic Acids, Metal Ions And Amine Compounds R-HSA-425366	5/86	0.325384	0.669839	1.34797	1.51343	SLC44A1;HEPH;SLC30A3;SLC22A2;SLC6A1
XBP1(S) Activates Chaperone Genes R-HSA-381038	3/46	0.328002	0.669839	1.52307	1.69782	GOSR2;PLA2G4B;SEC31A
COPII-mediated Vesicle Transport R-HSA-204005	4/66	0.328424	0.669839	1.40864	1.56845	TRAPPC2L;GOSR2;SEC24C;SEC31A
Interleukin-4 And Interleukin-13 Signaling R-HSA-6785807	6/107	0.328749	0.669839	1.29738	1.44329	HSPA8;MUC1;GATA3;TNF;TP53;SOCS5
O-linked Glycosylation R-HSA-5173105	6/107	0.328749	0.669839	1.29738	1.44329	MUC1;ADAMTSL2;B3GLCT;LARGE1;GALNT10;ADAMTS7
DNA Double-Strand Break Repair R-HSA-5693532	8/149	0.330305	0.669839	1.23935	1.37287	RAD51B;MDC1;BLM;MRE11;PCNA;ARTN;SIRT6;TP53
Activation Of PUMA And Translocation To Mitochondria R-HSA-139915	1/9	0.33212	0.669839	2.7276	3.00652	TP53
Amino Acid Conjugation R-HSA-156587	1/9	0.33212	0.669839	2.7276	3.00652	GLYATL1
Atorvastatin ADME R-HSA-9754706	1/9	0.33212	0.669839	2.7276	3.00652	ABCC2
Beta-oxidation Of pristanoyl-CoA R-HSA-389887	1/9	0.33212	0.669839	2.7276	3.00652	AMACR
CD163 Mediating An Anti-Inflammatory Response R-HSA-9662834	1/9	0.33212	0.669839	2.7276	3.00652	MYH9
CHL1 Interactions R-HSA-447041	1/9	0.33212	0.669839	2.7276	3.00652	HSPA8
Displacement Of DNA Glycosylase By APEX1 R-HSA-110357	1/9	0.33212	0.669839	2.7276	3.00652	APEX1
E2F-enabled Inhibition Of Pre-Replication Complex Formation R-HSA-113507	1/9	0.33212	0.669839	2.7276	3.00652	ORC4
Interleukin-1 Processing R-HSA-448706	1/9	0.33212	0.669839	2.7276	3.00652	NFKB2
MET Activates RAS Signaling R-HSA-8851805	1/9	0.33212	0.669839	2.7276	3.00652	RANBP10
MET Receptor Recycling R-HSA-8875656	1/9	0.33212	0.669839	2.7276	3.00652	PIGU
NR1H2 And NR1H3 Regulate Gene Expression To Control Bile Acid Homeostasis R-HSA-9623433	1/9	0.33212	0.669839	2.7276	3.00652	FABP6
Opsins R-HSA-419771	1/9	0.33212	0.669839	2.7276	3.00652	RHO
PI3K/AKT Activation R-HSA-198203	1/9	0.33212	0.669839	2.7276	3.00652	RHOA
PI5P Regulates TP53 Acetylation R-HSA-6811555	1/9	0.33212	0.669839	2.7276	3.00652	TP53
POU5F1 (OCT4), SOX2, NANOG Repress Genes Related To Differentiation R-HSA-2892245	1/9	0.33212	0.669839	2.7276	3.00652	EOMES
Phase 3 - Rapid Repolarisation R-HSA-5576890	1/9	0.33212	0.669839	2.7276	3.00652	KCNA5
Processing And Activation Of SUMO R-HSA-3215018	1/9	0.33212	0.669839	2.7276	3.00652	SAE1
RHO GTPases Activate Rhotekin And Rhophilins R-HSA-5666185	1/9	0.33212	0.669839	2.7276	3.00652	RHOA
Small Interfering RNA (siRNA) Biogenesis R-HSA-426486	1/9	0.33212	0.669839	2.7276	3.00652	TARBP2
Type I Hemidesmosome Assembly R-HSA-446107	1/9	0.33212	0.669839	2.7276	3.00652	PLEC
tRNA Modification In Mitochondrion R-HSA-6787450	1/9	0.33212	0.669839	2.7276	3.00652	GTPBP3
Endogenous Sterols R-HSA-211976	2/27	0.333057	0.669839	1.7461	1.91974	CYP19A1;CYP8B1
Insulin Processing R-HSA-264876	2/27	0.333057	0.669839	1.7461	1.91974	PCSK1;KIF5C
Fcgamma Receptor (FCGR) Dependent Phagocytosis R-HSA-2029480	5/87	0.334112	0.670889	1.33146	1.45966	CYFIP2;ITPR1;MYH9;ITPR3;FYN
Nucleotide Excision Repair R-HSA-5696398	6/108	0.336567	0.674742	1.2846	1.39887	PCNA;UVSSA;ACTL6A;ERCC2;COPS7A;RBX1
Collagen Biosynthesis And Modifying Enzymes R-HSA-1650814	4/67	0.338474	0.67596	1.38621	1.50169	COLGALT2;P4HA2;COL4A6;COL4A5
RNA Polymerase II Transcription Termination R-HSA-73856	4/67	0.338474	0.67596	1.38621	1.50169	CPSF6;DDX39B;PCF11;SYMPK
Signaling By Receptor Tyrosine Kinases R-HSA-9006934	24/496	0.338785	0.67596	1.11179	1.20339	CYFIP2;PDGFRB;PIGU;HDAC3;YWHAB;KCNH8;ITPR1;PRKCA;ITPR3;CHD4;AP2B1;RHOA;FGF4;MAPK11;FGF7;RPS6KA2;MKNK1;STMN1;FGF18;RANBP10;ID3;COL4A5;ITGAV;FYN
Deubiquitination R-HSA-5688426	14/279	0.340894	0.679092	1.15443	1.24238	USP37;USP48;WDR48;USP5;USP20;RIPK2;ACTL6A;GATA3;RHOA;KAT2A;PSMA4;PSME1;TRIM25;TP53
Signaling By Interleukins R-HSA-449147	22/453	0.341495	0.679213	1.11593	1.19898	IL32;SNAP25;HSPA8;RIPK2;FBXW11;KCNH8;PRKCA;GATA3;TNF;RBX1;NFKB2;CXCL10;MAPK11;MUC1;PSMA4;IRAK1;RPS6KA2;PSME1;FYN;CCL19;TP53;SOCS5
Metabolism Of Porphyrins R-HSA-189445	2/28	0.34925	0.685426	1.67886	1.7661	ABCC2;HMOX2
Paracetamol ADME R-HSA-9753281	2/28	0.34925	0.685426	1.67886	1.7661	SULT1A1;ABCC2
Interleukin-1 Family Signaling R-HSA-446652	8/152	0.350168	0.685426	1.21334	1.2732	PSMA4;IRAK1;FBXW11;RIPK2;PSME1;TP53;RBX1;NFKB2
Unfolded Protein Response (UPR) R-HSA-381119	5/89	0.351623	0.685426	1.29963	1.35836	HSPA5;PLA2G4B;DDIT3;GOSR2;SEC31A
Orc1 Removal From Chromatin R-HSA-68949	4/69	0.358599	0.685426	1.34341	1.37774	ORC4;PSMA4;PSME1;RBX1
Collagen Formation R-HSA-1474290	5/90	0.360397	0.685426	1.28427	1.31066	COLGALT2;P4HA2;COL4A6;COL4A5;PLEC
Switching Of Origins To A Post-Replicative State R-HSA-69052	5/90	0.360397	0.685426	1.28427	1.31066	ORC4;PSMA4;PSME1;ANAPC5;RBX1
Acetylcholine Regulates Insulin Secretion R-HSA-399997	1/10	0.361419	0.685426	2.4244	2.46736	PRKCA
Activation Of AP-1 Family Of Transcription Factors R-HSA-450341	1/10	0.361419	0.685426	2.4244	2.46736	MAPK11
Calcitonin-like Ligand Receptors R-HSA-419812	1/10	0.361419	0.685426	2.4244	2.46736	CALCA
Condensation Of Prometaphase Chromosomes R-HSA-2514853	1/10	0.361419	0.685426	2.4244	2.46736	CCNB2
FGFR2b Ligand Binding And Activation R-HSA-190377	1/10	0.361419	0.685426	2.4244	2.46736	FGF7
Glucocorticoid Biosynthesis R-HSA-194002	1/10	0.361419	0.685426	2.4244	2.46736	HSD11B2
HuR (ELAVL1) Binds And Stabilizes mRNA R-HSA-450520	1/10	0.361419	0.685426	2.4244	2.46736	PRKCA
IRAK1 Recruits IKK Complex R-HSA-937039	1/10	0.361419	0.685426	2.4244	2.46736	IRAK1
Ketone Body Metabolism R-HSA-74182	1/10	0.361419	0.685426	2.4244	2.46736	BDH2
Nef Mediated Downregulation Of MHC Class I Complex Cell Surface Expression R-HSA-164940	1/10	0.361419	0.685426	2.4244	2.46736	AP1S1
Neurotransmitter Clearance R-HSA-112311	1/10	0.361419	0.685426	2.4244	2.46736	SLC22A2
Organic Cation Transport R-HSA-549127	1/10	0.361419	0.685426	2.4244	2.46736	SLC22A2
Purine Ribonucleoside Monophosphate Biosynthesis R-HSA-73817	1/10	0.361419	0.685426	2.4244	2.46736	PFAS
RHO GTPases Activate KTN1 R-HSA-5625970	1/10	0.361419	0.685426	2.4244	2.46736	RHOA
RUNX1 And FOXP3 Control Development Of Regulatory T Lymphocytes (Tregs) R-HSA-8877330	1/10	0.361419	0.685426	2.4244	2.46736	TNFRSF18
STAT3 Nuclear Events Downstream Of ALK Signaling R-HSA-9701898	1/10	0.361419	0.685426	2.4244	2.46736	HDAC3
Signaling By FGFR4 In Disease R-HSA-5655291	1/10	0.361419	0.685426	2.4244	2.46736	PIGU
Tetrahydrobiopterin (BH4) Synthesis, Recycling, Salvage And Regulation R-HSA-1474151	1/10	0.361419	0.685426	2.4244	2.46736	GCHFR
Thyroxine Biosynthesis R-HSA-209968	1/10	0.361419	0.685426	2.4244	2.46736	DIDO1
mRNA Editing R-HSA-75072	1/10	0.361419	0.685426	2.4244	2.46736	ADARB1
rRNA Processing In Mitochondrion R-HSA-8868766	1/10	0.361419	0.685426	2.4244	2.46736	TFB1M
Netrin-1 Signaling R-HSA-373752	3/49	0.364387	0.685426	1.42352	1.43709	MAPK11;FYN;DSCAML1
TP53 Regulates Transcription Of Cell Cycle Genes R-HSA-6791312	3/49	0.364387	0.685426	1.42352	1.43709	CNOT6;PCNA;TP53
Activation Of G Protein Gated Potassium Channels R-HSA-1296041	2/29	0.365306	0.685426	1.61659	1.62794	GNB1;KCNJ16
Cristae Formation R-HSA-8949613	2/29	0.365306	0.685426	1.61659	1.62794	MICOS13;ATP5F1D
Dectin-2 Family R-HSA-5621480	2/29	0.365306	0.685426	1.61659	1.62794	MUC1;FYN
Energy Dependent Regulation Of mTOR By LKB1-AMPK R-HSA-380972	2/29	0.365306	0.685426	1.61659	1.62794	PRKAA1;PRKAB1
FCERI Mediated Ca+2 Mobilization R-HSA-2871809	2/29	0.365306	0.685426	1.61659	1.62794	ITPR1;ITPR3
Regulation Of TP53 Activity Thru Acetylation R-HSA-6804758	2/29	0.365306	0.685426	1.61659	1.62794	CHD4;TP53
Surfactant Metabolism R-HSA-5683826	2/29	0.365306	0.685426	1.61659	1.62794	DMBT1;SLC34A1
Uptake And Actions Of Bacterial Toxins R-HSA-5339562	2/29	0.365306	0.685426	1.61659	1.62794	SNAP25;SV2C
Disorders Of Transmembrane Transporters R-HSA-5619115	9/176	0.366979	0.68754	1.17694	1.17982	NUP205;ABCC2;PSMA4;HEPH;NUP133;SLC34A1;TPR;NUP62;PSME1
Mitotic Prophase R-HSA-68875	6/112	0.368011	0.688448	1.23586	1.23542	CCNB2;NUP205;NUP133;TPR;NUP62;PRKCA
HCMV Late Events R-HSA-9610379	5/91	0.369176	0.689604	1.26927	1.2648	PCSK1;NUP205;NUP133;NUP62;TPR
DNA Replication R-HSA-69306	8/155	0.370173	0.690441	1.18839	1.181	ORC4;GINS2;POLA2;PSMA4;PCNA;PSME1;ANAPC5;RBX1
Reproduction R-HSA-1474165	6/113	0.375897	0.696994	1.22425	1.19785	DIDO1;BLM;MRE11;ARTN;HSPA2;MLH3
Cargo Trafficking To Periciliary Membrane R-HSA-5620920	3/50	0.376454	0.696994	1.39315	1.36105	ARL3;RHO;RAB8A
Chondroitin Sulfate/Dermatan Sulfate Metabolism R-HSA-1793185	3/50	0.376454	0.696994	1.39315	1.36105	B3GAT2;DSE;B3GALT6
Extension Of Telomeres R-HSA-180786	3/50	0.376454	0.696994	1.39315	1.36105	BLM;POLA2;PCNA
Regulation Of Ornithine Decarboxylase (ODC) R-HSA-350562	3/50	0.376454	0.696994	1.39315	1.36105	PSMA4;PSME1;AZIN1
Diseases Of Programmed Cell Death R-HSA-9645723	4/71	0.378711	0.697438	1.30317	1.26536	POLA2;TP53;CDC25B;EZH2
trans-Golgi Network Vesicle Budding R-HSA-199992	4/71	0.378711	0.697438	1.30317	1.26536	HSPA8;AP4E1;AP1S1;SNX5
Activation Of BH3-only Proteins R-HSA-114452	2/30	0.381208	0.697438	1.55878	1.5033	YWHAB;TP53
Downstream Signaling Of Activated FGFR1 R-HSA-5654687	2/30	0.381208	0.697438	1.55878	1.5033	PIGU;FGF4
RNA Polymerase I Transcription Termination R-HSA-73863	2/30	0.381208	0.697438	1.55878	1.5033	TBP;ERCC2
Synthesis Of Active Ubiquitin: Roles Of E1 And E2 Enzymes R-HSA-8866652	2/30	0.381208	0.697438	1.55878	1.5033	USP5;UBE2T
Transcriptional Regulation Of Pluripotent Stem Cells R-HSA-452723	2/30	0.381208	0.697438	1.55878	1.5033	EOMES;EPHA1
Oxidative Stress Induced Senescence R-HSA-2559580	5/93	0.386735	0.697438	1.24029	1.17829	MAPK11;CBX6;E2F2;TP53;EZH2
Ub-specific Processing Proteases R-HSA-5689880	10/201	0.387345	0.697438	1.14326	1.08431	KAT2A;USP37;USP48;WDR48;PSMA4;USP5;USP20;PSME1;GATA3;TP53
Autodegradation Of E3 Ubiquitin Ligase COP1 R-HSA-349425	3/51	0.388473	0.697438	1.36406	1.28976	PSMA4;PSME1;TP53
GSK3B And BTRC:CUL1-mediated-degradation Of NFE2L2 R-HSA-9762114	3/51	0.388473	0.697438	1.36406	1.28976	PSMA4;PSME1;RBX1
Nonhomologous End-Joining (NHEJ) R-HSA-5693571	3/51	0.388473	0.697438	1.36406	1.28976	MDC1;MRE11;ARTN
Cdc20:Phospho-APC/C Mediated Degradation Of Cyclin A R-HSA-174184	4/72	0.388746	0.697438	1.28394	1.21311	PSMA4;PSME1;BUB1B;ANAPC5
Interferon Alpha/Beta Signaling R-HSA-909733	4/72	0.388746	0.697438	1.28394	1.21311	IFNA4;IFNA17;IFNA10;IP6K2
Dermatan Sulfate Biosynthesis R-HSA-2022923	1/11	0.389435	0.697438	2.18185	2.05761	DSE
Ethanol Oxidation R-HSA-71384	1/11	0.389435	0.697438	2.18185	2.05761	ACSS1
MET Activates RAP1 And RAC1 R-HSA-8875555	1/11	0.389435	0.697438	2.18185	2.05761	PIGU
NOTCH4 Activation And Transmission Of Signal To Nucleus R-HSA-9013700	1/11	0.389435	0.697438	2.18185	2.05761	JAG1
Regulation Of BACH1 Activity R-HSA-9708530	1/11	0.389435	0.697438	2.18185	2.05761	RBX1
SUMOylation Of Immune Response Proteins R-HSA-4755510	1/11	0.389435	0.697438	2.18185	2.05761	NFKB2
Signaling By Activated Point Mutants Of FGFR1 R-HSA-1839122	1/11	0.389435	0.697438	2.18185	2.05761	FGF4
Synthesis Of PIPs At Late Endosome Membrane R-HSA-1660517	1/11	0.389435	0.697438	2.18185	2.05761	MTMR4
Unwinding Of DNA R-HSA-176974	1/11	0.389435	0.697438	2.18185	2.05761	GINS2
Metabolism Of RNA R-HSA-8953854	31/666	0.391674	0.699632	1.06686	0.999995	NUP205;YWHAB;ADARB1;TFB1M;LAGE3;OSGEP;EXOSC10;PCF11;TPR;NUP62;SYMPK;RBM5;NOP56;HSPA8;PPIL1;CPSF6;NUP133;PRKCA;SNUPN;GTPBP3;MAPK11;CNOT6;PSMA4;DDX39B;EPRS1;HNRNPUL1;PRPF3;ERCC2;PSME1;TSR1;GEMIN8
Downstream TCR Signaling R-HSA-202424	5/94	0.395506	0.699632	1.22629	1.13749	PSMA4;FBXW11;RIPK2;PSME1;CD3D
Activated NOTCH1 Transmits Signal To Nucleus R-HSA-2122948	2/31	0.396936	0.699632	1.50495	1.39054	JAG1;CNTN1
RUNX2 Regulates Bone Development R-HSA-8941326	2/31	0.396936	0.699632	1.50495	1.39054	HDAC3;HEY2
Regulation Of MECP2 Expression And Activity R-HSA-9022692	2/31	0.396936	0.699632	1.50495	1.39054	HDAC3;PRKCA
Sealing Of Nuclear Envelope (NE) By ESCRT-III R-HSA-9668328	2/31	0.396936	0.699632	1.50495	1.39054	TUBA1B;TUBB
APC:Cdc20 Mediated Degradation Of Cell Cycle Proteins Before Cycle Checkpoint Satisfied R-HSA-179419	4/73	0.398758	0.699632	1.26527	1.16329	PSMA4;PSME1;BUB1B;ANAPC5
Epigenetic Regulation Of Gene Expression R-HSA-212165	6/116	0.399567	0.699632	1.19067	1.09229	KAT2A;TBP;PHF1;ERCC2;CHD4;EZH2
PPARA Activates Gene Expression R-HSA-1989781	6/116	0.399567	0.699632	1.19067	1.09229	MED12;HDAC3;NRF1;NPAS2;MED29;MED17
Diseases Of Metabolism R-HSA-5668914	12/247	0.399919	0.699632	1.11502	1.02191	ALG8;MUC1;ADAMTSL2;B3GLCT;B3GALT6;LARGE1;SLC37A4;GYG1;CYP19A1;APRT;GALK1;ADAMTS7
Regulation Of Apoptosis R-HSA-169911	3/52	0.400435	0.699632	1.33615	1.22285	MED12;PSMA4;PSME1
Transcriptional Activation Of Mitochondrial Biogenesis R-HSA-2151201	3/52	0.400435	0.699632	1.33615	1.22285	HDAC3;NRF1;TFB1M
Drug ADME R-HSA-9748784	5/95	0.404266	0.699632	1.2126	1.09823	SULT1A1;ABCC2;GLYATL1;GUK1;SLC22A2
PTEN Regulation R-HSA-6807070	7/139	0.409324	0.699632	1.15758	1.03401	CBX6;PSMA4;HDAC3;PSME1;CHD4;TP53;EZH2
RAF/MAP Kinase Cascade R-HSA-5673001	13/271	0.410243	0.699632	1.10019	0.980274	PDGFRB;YWHAB;RASAL2;GFRA4;FGF4;RBX1;FGF7;PSMA4;ARTN;RASA4;FGF18;PSME1;FYN
Negative Regulation Of NOTCH4 Signaling R-HSA-9604323	3/53	0.41233	0.699632	1.30936	1.16	PSMA4;PSME1;RBX1
Vif-mediated Degradation Of APOBEC3G R-HSA-180585	3/53	0.41233	0.699632	1.30936	1.16	PSMA4;PSME1;RBX1
Activation Of Pre-Replicative Complex R-HSA-68962	2/32	0.412477	0.699632	1.4547	1.28825	ORC4;POLA2
Cargo Concentration In ER R-HSA-5694530	2/32	0.412477	0.699632	1.4547	1.28825	GOSR2;SEC24C
G-protein Beta:Gamma Signaling R-HSA-397795	2/32	0.412477	0.699632	1.4547	1.28825	GNB1;RHOA
GPVI-mediated Activation Cascade R-HSA-114604	2/32	0.412477	0.699632	1.4547	1.28825	FYN;RHOA
PERK Regulates Gene Expression R-HSA-381042	2/32	0.412477	0.699632	1.4547	1.28825	HSPA5;DDIT3
Phase 0 - Rapid Depolarisation R-HSA-5576892	2/32	0.412477	0.699632	1.4547	1.28825	CACNB2;FGF12
Termination Of Translesion DNA Synthesis R-HSA-5656169	2/32	0.412477	0.699632	1.4547	1.28825	PCNA;TRIM25
Regulation Of Lipid Metabolism By PPARalpha R-HSA-400206	6/118	0.415323	0.699632	1.16928	1.02745	MED12;HDAC3;NRF1;NPAS2;MED29;MED17
Activation Of RAC1 R-HSA-428540	1/12	0.416223	0.699632	1.9834	1.73851	BUB1B-PAK6
Butyrophilin (BTN) Family Interactions R-HSA-8851680	1/12	0.416223	0.699632	1.9834	1.73851	BTN2A1
CD28 Dependent Vav1 Pathway R-HSA-389359	1/12	0.416223	0.699632	1.9834	1.73851	FYN
Caspase-mediated Cleavage Of Cytoskeletal Proteins R-HSA-264870	1/12	0.416223	0.699632	1.9834	1.73851	PLEC
Eicosanoids R-HSA-211979	1/12	0.416223	0.699632	1.9834	1.73851	CYP8B1
Erythropoietin Activates Phosphoinositide-3-kinase (PI3K) R-HSA-9027276	1/12	0.416223	0.699632	1.9834	1.73851	PIGU
FGFR1c Ligand Binding And Activation R-HSA-190373	1/12	0.416223	0.699632	1.9834	1.73851	FGF4
Frs2-mediated Activation R-HSA-170968	1/12	0.416223	0.699632	1.9834	1.73851	YWHAB
NOTCH2 Intracellular Domain Regulates Transcription R-HSA-2197563	1/12	0.416223	0.699632	1.9834	1.73851	MAMLD1
POU5F1 (OCT4), SOX2, NANOG Activate Genes Related To Proliferation R-HSA-2892247	1/12	0.416223	0.699632	1.9834	1.73851	EPHA1
Peptide Hormone Biosynthesis R-HSA-209952	1/12	0.416223	0.699632	1.9834	1.73851	PCSK1
Platelet Adhesion To Exposed Collagen R-HSA-75892	1/12	0.416223	0.699632	1.9834	1.73851	FYN
Presynaptic Depolarization And Calcium Channel Opening R-HSA-112308	1/12	0.416223	0.699632	1.9834	1.73851	CACNB2
Presynaptic Nicotinic Acetylcholine Receptors R-HSA-622323	1/12	0.416223	0.699632	1.9834	1.73851	CHRNG
Pyrimidine Catabolism R-HSA-73621	1/12	0.416223	0.699632	1.9834	1.73851	SCO2
Regulation Of Glycolysis By Fructose 2,6-Bisphosphate Metabolism R-HSA-9634600	1/12	0.416223	0.699632	1.9834	1.73851	PRKCA
Regulation Of Localization Of FOXO Transcription Factors R-HSA-9614399	1/12	0.416223	0.699632	1.9834	1.73851	YWHAB
TP53 Regulates Transcription Of Death Receptors And Ligands R-HSA-6803211	1/12	0.416223	0.699632	1.9834	1.73851	TP53
Tandem Pore Domain Potassium Channels R-HSA-1296346	1/12	0.416223	0.699632	1.9834	1.73851	KCNK17
Telomere C-strand Synthesis Initiation R-HSA-174430	1/12	0.416223	0.699632	1.9834	1.73851	POLA2
p38MAPK Events R-HSA-171007	1/12	0.416223	0.699632	1.9834	1.73851	MAPK11
APC/C:Cdc20 Mediated Degradation Of Mitotic Proteins R-HSA-176409	4/75	0.418691	0.702843	1.2295	1.07043	PSMA4;PSME1;BUB1B;ANAPC5
Transcriptional Regulation By RUNX2 R-HSA-8878166	6/119	0.423185	0.705904	1.15888	0.99657	PSMA4;HDAC3;HAND2;HEY2;PSME1;RBX1
MAPK Family Signaling Cascades R-HSA-5683057	15/318	0.423418	0.705904	1.08084	0.928869	PDGFRB;YWHAB;PRKCA;RASAL2;GFRA4;FGF4;RBX1;FGF7;PSMA4;ARTN;CDC42EP5;RASA4;FGF18;PSME1;FYN
AUF1 (hnRNP D0) Binds And Destabilizes mRNA R-HSA-450408	3/54	0.42415	0.705904	1.28362	1.10092	HSPA8;PSMA4;PSME1
FBXL7 Down-Regulates AURKA During Mitotic Entry And In Early Mitosis R-HSA-8854050	3/54	0.42415	0.705904	1.28362	1.10092	PSMA4;PSME1;RBX1
Cooperation Of Prefoldin And TriC/CCT In Actin And Tubulin Folding R-HSA-389958	2/33	0.427817	0.705904	1.40771	1.19523	TUBA1B;TUBB
Diseases Of Carbohydrate Metabolism R-HSA-5663084	2/33	0.427817	0.705904	1.40771	1.19523	SLC37A4;GYG1
Negative Regulation Of FGFR1 Signaling R-HSA-5654726	2/33	0.427817	0.705904	1.40771	1.19523	MKNK1;FGF4
Oncogene Induced Senescence R-HSA-2559585	2/33	0.427817	0.705904	1.40771	1.19523	E2F2;TP53
Signal Amplification R-HSA-392518	2/33	0.427817	0.705904	1.40771	1.19523	TBXA2R;GNB1
Signaling To ERKs R-HSA-187687	2/33	0.427817	0.705904	1.40771	1.19523	MAPK11;YWHAB
Activation Of APC/C And APC/C:Cdc20 Mediated Degradation Of Mitotic Proteins R-HSA-176814	4/76	0.428602	0.705904	1.21236	1.02714	PSMA4;PSME1;BUB1B;ANAPC5
Transcriptional Regulation By Small RNAs R-HSA-5578749	4/76	0.428602	0.705904	1.21236	1.02714	NUP205;NUP133;NUP62;TPR
Phospholipid Metabolism R-HSA-1483257	10/208	0.428894	0.705904	1.10243	0.933258	SLC44A1;PLEKHA1;OSBPL5;TAFAZZIN;PLA2G4B;PLA2G4C;PI4KA;MTMR4;PLA2R1;PLA1A
RUNX1 Regulates Transcription Of Genes Involved In Differentiation Of HSCs R-HSA-8939236	5/98	0.430434	0.705904	1.1733	0.989047	TCF7L1;PSMA4;KMT2A;PSME1;GATA3
Clathrin-mediated Endocytosis R-HSA-8856828	7/142	0.430961	0.705904	1.13168	0.95258	HSPA8;RAB5B;NECAP2;FNBP1;COPS7A;AP2B1;CD3D
Platelet Activation, Signaling And Aggregation R-HSA-76002	12/254	0.437614	0.705904	1.08237	0.894487	PRKCH;HSPA5;WDR1;MMRN1;TBXA2R;GNB1;ITPR1;PRKCA;MAGED2;ITPR3;FYN;RHOA
Biosynthesis Of N-glycan Precursor (Dolichol LLO) And Transfer To Protein R-HSA-446193	4/77	0.438467	0.705904	1.19569	0.98581	GMPPB;ALG8;NAGK;GMPPA
Signaling By Insulin Receptor R-HSA-74752	4/77	0.438467	0.705904	1.19569	0.98581	PIGU;FGF7;FGF18;FGF4
MAPK1/MAPK3 Signaling R-HSA-5684996	13/277	0.44122	0.705904	1.07484	0.879448	PDGFRB;YWHAB;RASAL2;GFRA4;FGF4;RBX1;FGF7;PSMA4;ARTN;RASA4;FGF18;PSME1;FYN
Chk1/Chk2(Cds1) Mediated Inactivation Of Cyclin B:Cdk1 Complex R-HSA-75035	1/13	0.441837	0.705904	1.81802	1.48498	YWHAB
Dissolution Of Fibrin Clot R-HSA-75205	1/13	0.441837	0.705904	1.81802	1.48498	SERPINE2
FCGR Activation R-HSA-2029481	1/13	0.441837	0.705904	1.81802	1.48498	FYN
Glutamate And Glutamine Metabolism R-HSA-8964539	1/13	0.441837	0.705904	1.81802	1.48498	PYCR1
Glycogen Synthesis R-HSA-3322077	1/13	0.441837	0.705904	1.81802	1.48498	GYG1
IRF3-mediated Induction Of Type I IFN R-HSA-3270619	1/13	0.441837	0.705904	1.81802	1.48498	MRE11
Inhibition Of Replication Initiation Of Damaged DNA By RB1/E2F1 R-HSA-113501	1/13	0.441837	0.705904	1.81802	1.48498	POLA2
Mitochondrial Iron-Sulfur Cluster Biogenesis R-HSA-1362409	1/13	0.441837	0.705904	1.81802	1.48498	FXN
NF-kB Activation Thru FADD/RIP-1 Pathway Mediated By Caspase-8 And -10 R-HSA-933543	1/13	0.441837	0.705904	1.81802	1.48498	TRIM25
NF-kB Is Activated And Signals Survival R-HSA-209560	1/13	0.441837	0.705904	1.81802	1.48498	IRAK1
Nucleotide Biosynthesis R-HSA-8956320	1/13	0.441837	0.705904	1.81802	1.48498	PFAS
PTK6 Regulates RHO GTPases, RAS GTPase And MAP Kinases R-HSA-8849471	1/13	0.441837	0.705904	1.81802	1.48498	RHOA
SARS-CoV-2 Targets Host Intracellular Signaling And Regulatory Pathways R-HSA-9755779	1/13	0.441837	0.705904	1.81802	1.48498	YWHAB
Signal Regulatory Protein Family Interactions R-HSA-391160	1/13	0.441837	0.705904	1.81802	1.48498	CD47
Synthesis, Secretion, And Inactivation Of Glucose-dependent Insulinotropic Polypeptide (GIP) R-HSA-400511	1/13	0.441837	0.705904	1.81802	1.48498	PCSK1
TNFR1-induced Proapoptotic Signaling R-HSA-5357786	1/13	0.441837	0.705904	1.81802	1.48498	TNF
Trafficking And Processing Of Endosomal TLR R-HSA-1679131	1/13	0.441837	0.705904	1.81802	1.48498	TLR7
Transcriptional Regulation Of Testis Differentiation R-HSA-9690406	1/13	0.441837	0.705904	1.81802	1.48498	WT1
COPI-independent Golgi-to-ER Retrograde Traffic R-HSA-6811436	2/34	0.442942	0.705904	1.36364	1.11044	DYNC1H1;PAFAH1B3
EPHB-mediated Forward Signaling R-HSA-3928662	2/34	0.442942	0.705904	1.36364	1.11044	FYN;RHOA
Transcriptional Regulation By E2F6 R-HSA-8953750	2/34	0.442942	0.705904	1.36364	1.11044	PCGF2;EZH2
Stabilization Of P53 R-HSA-69541	3/56	0.447533	0.710816	1.23505	0.992986	PSMA4;PSME1;TP53
Oncogenic MAPK Signaling R-HSA-6802957	4/78	0.448283	0.710816	1.17947	0.946324	CLCN6;YWHAB;TRAK1;SND1
Pre-NOTCH Expression And Processing R-HSA-1912422	4/78	0.448283	0.710816	1.17947	0.946324	KAT2A;SIRT6;TP53;MAMLD1
RNA Polymerase I Promoter Clearance R-HSA-73854	4/78	0.448283	0.710816	1.17947	0.946324	KAT2A;TBP;ERCC2;CHD4
Inwardly Rectifying K+ Channels R-HSA-1296065	2/35	0.457843	0.717735	1.32225	1.03298	GNB1;KCNJ16
N-glycan Trimming In ER And Calnexin/Calreticulin Cycle R-HSA-532668	2/35	0.457843	0.717735	1.32225	1.03298	RNF139;AMFR
RHOBTB GTPase Cycle R-HSA-9706574	2/35	0.457843	0.717735	1.32225	1.03298	DDX39B;PDE5A
RNA Polymerase I Transcription R-HSA-73864	4/79	0.458044	0.717735	1.16368	0.908591	KAT2A;TBP;ERCC2;CHD4
Cytoprotection By HMOX1 R-HSA-9707564	3/57	0.459081	0.717735	1.21212	0.943666	HDAC3;SCO2;HMOX2
Neurexins And Neuroligins R-HSA-6794361	3/57	0.459081	0.717735	1.21212	0.943666	NRXN1;NRXN2;HOMER3
Acetylcholine Binding And Downstream Events R-HSA-181431	1/14	0.466328	0.717735	1.67808	1.28015	CHRNG
Constitutive Signaling By EGFRvIII R-HSA-5637810	1/14	0.466328	0.717735	1.67808	1.28015	PIGU
DCC Mediated Attractive Signaling R-HSA-418885	1/14	0.466328	0.717735	1.67808	1.28015	FYN
Glycogen Breakdown (Glycogenolysis) R-HSA-70221	1/14	0.466328	0.717735	1.67808	1.28015	GYG1
Golgi Cisternae Pericentriolar Stack Reorganization R-HSA-162658	1/14	0.466328	0.717735	1.67808	1.28015	CCNB2
Lysosphingolipid And LPA Receptors R-HSA-419408	1/14	0.466328	0.717735	1.67808	1.28015	S1PR3
Mismatch Repair (MMR) Directed By MSH2:MSH3 (MutSbeta) R-HSA-5358606	1/14	0.466328	0.717735	1.67808	1.28015	PCNA
Mismatch Repair (MMR) Directed By MSH2:MSH6 (MutSalpha) R-HSA-5358565	1/14	0.466328	0.717735	1.67808	1.28015	PCNA
Physiological Factors R-HSA-5578768	1/14	0.466328	0.717735	1.67808	1.28015	NPRL2
Prolonged ERK Activation Events R-HSA-169893	1/14	0.466328	0.717735	1.67808	1.28015	YWHAB
Regulation Of TP53 Activity Thru Association With Co-factors R-HSA-6804759	1/14	0.466328	0.717735	1.67808	1.28015	TP53
Repression Of WNT Target Genes R-HSA-4641265	1/14	0.466328	0.717735	1.67808	1.28015	TCF7L1
Response To Metal Ions R-HSA-5660526	1/14	0.466328	0.717735	1.67808	1.28015	CSRP1
Retrograde Neurotrophin Signaling R-HSA-177504	1/14	0.466328	0.717735	1.67808	1.28015	AP2B1
Role Of LAT2/NTAL/LAB On Calcium Mobilization R-HSA-2730905	1/14	0.466328	0.717735	1.67808	1.28015	FYN
SEMA3A-Plexin Repulsion Signaling By Inhibiting Integrin Adhesion R-HSA-399955	1/14	0.466328	0.717735	1.67808	1.28015	FYN
TP53 Regulates Transcription Of Genes Involved In G1 Cell Cycle Arrest R-HSA-6804116	1/14	0.466328	0.717735	1.67808	1.28015	TP53
TP53 Regulates Transcription Of Additional Cell Death Genes With Uncertain Roles In P53-Dependent Apoptosis R-HSA-6803205	1/14	0.466328	0.717735	1.67808	1.28015	TP53
Regulation Of APC/C Activators Between G1/S And Early Anaphase R-HSA-176408	4/80	0.467745	0.719037	1.14831	0.872522	PSMA4;PSME1;BUB1B;ANAPC5
RHO GTPase Cycle R-HSA-9012999	20/441	0.47113	0.723356	1.0367	0.780247	CYFIP2;IL32;PLEKHG4;JAG1;FNBP1;CCDC115;DOCK9;RASAL2;MYO9A;RHOA;BUB1B-PAK6;FMNL3;GOLGA3;TUBA1B;FGD5;DDX39B;SH3PXD2A;CDC42EP5;PDE5A;HMOX2
Aberrant Regulation Of Mitotic Cell Cycle Due To RB1 Defects R-HSA-9687139	2/36	0.47251	0.72371	1.28329	0.962082	E2F2;ANAPC5
RHOH GTPase Cycle R-HSA-9013407	2/36	0.47251	0.72371	1.28329	0.962082	TUBA1B;BUB1B-PAK6
CDC42 GTPase Cycle R-HSA-9013148	7/149	0.480936	0.732292	1.0755	0.787287	FMNL3;PLEKHG4;SH3PXD2A;FNBP1;DOCK9;CDC42EP5;BUB1B-PAK6
Iron Uptake And Transport R-HSA-917937	3/59	0.481857	0.732292	1.1687	0.853279	HEPH;FTMT;HMOX2
Innate Immune System R-HSA-168249	46/1035	0.48434	0.732292	1.01497	0.735823	CYFIP2;SNAP25;IFNA4;DEFB105A;RAB5B;MRE11;ITPR1;ITPR3;PYCARD;PRDX5;MUC1;IRAK1;RPS6KA2;TRIM25;CASP2;ITGAV;FYN;GYG1;HMOX2;DYNC1H1;HSPA8;PTPRN2;RIPK2;FBXW11;IFNA17;KCNH8;DEFA4;TUBB;COMMD3;PRKCA;AMPD3;RBSN;RHOA;HRNR;NFKB2;APRT;MAPK11;PTPRB;PSMA4;RAP2B;PSME1;MYH9;TLR7;CD47;TP53;IFNA10
Fatty acyl-CoA Biosynthesis R-HSA-75105	2/37	0.486934	0.732292	1.24656	0.897059	ACSL5;CBR4
RHOV GTPase Cycle R-HSA-9013424	2/37	0.486934	0.732292	1.24656	0.897059	MYO9A;BUB1B-PAK6
Triglyceride Metabolism R-HSA-8979227	2/37	0.486934	0.732292	1.24656	0.897059	FABP6;PRKCA
Activation Of BAD And Translocation To Mitochondria R-HSA-111447	1/15	0.489746	0.732292	1.55814	1.11231	YWHAB
Constitutive Signaling By NOTCH1 HD Domain Mutants R-HSA-2691232	1/15	0.489746	0.732292	1.55814	1.11231	JAG1
Depolymerisation Of Nuclear Lamina R-HSA-4419969	1/15	0.489746	0.732292	1.55814	1.11231	PRKCA
Diseases Associated With Glycosylation Precursor Biosynthesis R-HSA-5609975	1/15	0.489746	0.732292	1.55814	1.11231	GALK1
ERBB2 Regulates Cell Motility R-HSA-6785631	1/15	0.489746	0.732292	1.55814	1.11231	RHOA
Mismatch Repair R-HSA-5358508	1/15	0.489746	0.732292	1.55814	1.11231	PCNA
Organic Cation/Anion/Zwitterion Transport R-HSA-549132	1/15	0.489746	0.732292	1.55814	1.11231	SLC22A2
Phase 2 - Plateau Phase R-HSA-5576893	1/15	0.489746	0.732292	1.55814	1.11231	CACNB2
Prolactin Receptor Signaling R-HSA-1170546	1/15	0.489746	0.732292	1.55814	1.11231	RBX1
Response Of EIF2AK1 (HRI) To Heme Deficiency R-HSA-9648895	1/15	0.489746	0.732292	1.55814	1.11231	DDIT3
Signaling By ERBB2 ECD Mutants R-HSA-9665348	1/15	0.489746	0.732292	1.55814	1.11231	PIGU
Synthesis Of Prostaglandins (PG) And Thromboxanes (TX) R-HSA-2162123	1/15	0.489746	0.732292	1.55814	1.11231	CYP8B1
Synthesis Of Bile Acids And Bile Salts Via 27-Hydroxycholesterol R-HSA-193807	1/15	0.489746	0.732292	1.55814	1.11231	CYP8B1
TRAF3-dependent IRF Activation Pathway R-HSA-918233	1/15	0.489746	0.732292	1.55814	1.11231	TRIM25
Class I MHC Mediated Antigen Processing And Presentation R-HSA-983169	17/378	0.492697	0.73465	1.02736	0.727228	HSPA5;FBXW11;UBAC1;RBX1;TAPBP;PSMA4;HERC1;TRIM39;PSME1;ASB6;TRIM69;TRIM36;ANAPC5;ITGAV;SEC24C;FBXO9;SEC31A
FCGR3A-mediated Phagocytosis R-HSA-9664422	3/60	0.493074	0.73465	1.14814	0.811846	CYFIP2;MYH9;FYN
Transcriptional Regulation By MECP2 R-HSA-8986944	3/60	0.493074	0.73465	1.14814	0.811846	HDAC3;IRAK1;PRKCA
Diseases Of Mitotic Cell Cycle R-HSA-9675126	2/38	0.50111	0.737679	1.21187	0.837319	E2F2;ANAPC5
Resolution Of Abasic Sites (AP Sites) R-HSA-73933	2/38	0.50111	0.737679	1.21187	0.837319	PCNA;APEX1
Ion Channel Transport R-HSA-983712	8/175	0.503242	0.737679	1.04496	0.717559	CLCN6;FXYD2;SCNN1A;FKBP1B;ANO9;TRPV1;TRPC4AP;RYR3
DNA Damage/Telomere Stress Induced Senescence R-HSA-2559586	3/61	0.504168	0.737679	1.12828	0.772701	MRE11;ARTN;TP53
Selective Autophagy R-HSA-9663891	3/61	0.504168	0.737679	1.12828	0.772701	DYNC1H1;HSPA8;PRKAB1
Degradation Of Beta-Catenin By Destruction Complex R-HSA-195253	4/84	0.505873	0.737679	1.09066	0.743255	TCF7L1;PSMA4;PSME1;RBX1
Fc Epsilon Receptor (FCERI) Signaling R-HSA-2454202	6/130	0.508101	0.737679	1.05546	0.714626	PSMA4;FBXW11;PSME1;ITPR1;ITPR3;FYN
G Alpha (S) Signaling Events R-HSA-418555	7/153	0.508962	0.737679	1.04581	0.706323	GPR39;CALCA;PDE4D;GNB1;PRKCA;ADCY1;ADCY6
FGFR1 Ligand Binding And Activation R-HSA-190242	1/16	0.512137	0.737679	1.45419	0.973086	FGF4
FOXO-mediated Transcription Of Cell Death Genes R-HSA-9614657	1/16	0.512137	0.737679	1.45419	0.973086	DDIT3
Formation Of ATP By Chemiosmotic Coupling R-HSA-163210	1/16	0.512137	0.737679	1.45419	0.973086	ATP5F1D
Gap Junction Assembly R-HSA-190861	1/16	0.512137	0.737679	1.45419	0.973086	GJC2
Hyaluronan Metabolism R-HSA-2142845	1/16	0.512137	0.737679	1.45419	0.973086	CEMIP
MAP3K8 (TPL2)-dependent MAPK1/3 Activation R-HSA-5684264	1/16	0.512137	0.737679	1.45419	0.973086	FBXW11
NRIF Signals Cell Death From Nucleus R-HSA-205043	1/16	0.512137	0.737679	1.45419	0.973086	ITGB3BP
Nucleotide-like (Purinergic) Receptors R-HSA-418038	1/16	0.512137	0.737679	1.45419	0.973086	ADORA1
PI3K Events In ERBB2 Signaling R-HSA-1963642	1/16	0.512137	0.737679	1.45419	0.973086	PIGU
Phospholipase C-mediated Cascade: FGFR1 R-HSA-5654219	1/16	0.512137	0.737679	1.45419	0.973086	FGF4
Processing Of SMDT1 R-HSA-8949664	1/16	0.512137	0.737679	1.45419	0.973086	SPG7
Regulation Of Pyruvate Dehydrogenase (PDH) Complex R-HSA-204174	1/16	0.512137	0.737679	1.45419	0.973086	PLPP6
STING Mediated Induction Of Host Immune Responses R-HSA-1834941	1/16	0.512137	0.737679	1.45419	0.973086	MRE11
SUMOylation Of DNA Methylation Proteins R-HSA-4655427	1/16	0.512137	0.737679	1.45419	0.973086	PCGF2
Sema3A PAK Dependent Axon Repulsion R-HSA-399954	1/16	0.512137	0.737679	1.45419	0.973086	FYN
Spry Regulation Of FGF Signaling R-HSA-1295596	1/16	0.512137	0.737679	1.45419	0.973086	MKNK1
Synthesis Of PIPs At Early Endosome Membrane R-HSA-1660516	1/16	0.512137	0.737679	1.45419	0.973086	MTMR4
TGF-beta Receptor Signaling In EMT (Epithelial To Mesenchymal Transition) R-HSA-2173791	1/16	0.512137	0.737679	1.45419	0.973086	RHOA
Translesion Synthesis By REV1 R-HSA-110312	1/16	0.512137	0.737679	1.45419	0.973086	PCNA
VLDLR Internalisation And Degradation R-HSA-8866427	1/16	0.512137	0.737679	1.45419	0.973086	AP2B1
Extracellular Matrix Organization R-HSA-1474244	13/291	0.512828	0.737679	1.01995	0.68114	COLGALT2;TMPRSS6;NRXN1;ICAM4;PRKCA;SH3PXD2A;P4HA2;CAPN10;COL4A6;COL4A5;ITGAV;CD47;PLEC
Synthesis Of PA R-HSA-1483166	2/39	0.515031	0.737679	1.17906	0.782339	PLA2G4B;PLA2R1
Transcriptional Regulation By VENTX R-HSA-8853884	2/39	0.515031	0.737679	1.17906	0.782339	ANAPC5;TP53
Translesion Synthesis By Y Family DNA Polymerases Bypasses Lesions On DNA Template R-HSA-110313	2/39	0.515031	0.737679	1.17906	0.782339	PCNA;TRIM25
Asymmetric Localization Of PCP Proteins R-HSA-4608870	3/62	0.515136	0.737679	1.1091	0.735696	PSMA4;FZD2;PSME1
TP53 Regulates Transcription Of DNA Repair Genes R-HSA-6796648	3/62	0.515136	0.737679	1.1091	0.735696	MDC1;ERCC2;TP53
ADORA2B Mediated Anti-Inflammatory Cytokine Production R-HSA-9660821	6/131	0.515614	0.737679	1.04696	0.693505	GPR39;CALCA;GNB1;PRKCA;ADCY1;ADCY6
Cell Junction Organization R-HSA-446728	4/86	0.524476	0.743213	1.06395	0.686628	CLDN10;FBLIM1;ILK;PLEC
Autodegradation Of Cdh1 By Cdh1:APC/C R-HSA-174084	3/63	0.525972	0.743213	1.09056	0.700693	PSMA4;PSME1;ANAPC5
Synthesis Of Substrates In N-glycan Biosythesis R-HSA-446219	3/63	0.525972	0.743213	1.09056	0.700693	GMPPB;NAGK;GMPPA
Immune System R-HSA-168256	85/1943	0.526884	0.743213	0.997274	0.639028	CYFIP2;SNAP25;IFNA4;CD40;DEFB105A;MRE11;YWHAB;ICAM4;CD3D;TNF;PYCARD;HERC1;KIF5C;RPS6KA2;NUP62;TRIM69;TRIM25;AP1S1;CASP2;ITGAV;GYG1;FBXO9;NUP133;RIPK2;FBXW11;IFNA17;KCNH8;TNFRSF18;TUBB;COMMD3;PRKCA;AMPD3;RBSN;RHOA;RBX1;APRT;TAPBP;PSMA4;RAP2B;PSME1;ORAI1;MYH9;ANAPC5;KIF2C;TLR7;CD47;TP53;IFNA10;NUP205;RAB5B;ITPR1;ITPR3;GATA3;PRDX5;MUC1;IRAK1;KIF3A;TPR;FLNB;FYN;SLAMF6;CCL19;HMOX2;IP6K2;SOCS5;SEC31A;I…
Class C/3 (Metabotropic Glutamate/Pheromone Receptors) R-HSA-420499	2/40	0.528691	0.743213	1.14797	0.73166	GRM2;TAS2R14
Aberrant Regulation Of Mitotic G1/S Transition In Cancer Due To RB1 Defects R-HSA-9659787	1/17	0.533547	0.743213	1.36323	0.85639	E2F2
Acetylcholine Neurotransmitter Release Cycle R-HSA-264642	1/17	0.533547	0.743213	1.36323	0.85639	SNAP25
Butyrate Response Factor 1 Binds And Destabilizes mRNA R-HSA-450385	1/17	0.533547	0.743213	1.36323	0.85639	YWHAB
Formation Of Senescence-Associated Heterochromatin Foci (SAHF) R-HSA-2559584	1/17	0.533547	0.743213	1.36323	0.85639	TP53
GAB1 Signalosome R-HSA-180292	1/17	0.533547	0.743213	1.36323	0.85639	PIGU
Gastrulation R-HSA-9758941	1/17	0.533547	0.743213	1.36323	0.85639	EOMES
KSRP (KHSRP) Binds And Destabilizes mRNA R-HSA-450604	1/17	0.533547	0.743213	1.36323	0.85639	MAPK11
Protein Methylation R-HSA-8876725	1/17	0.533547	0.743213	1.36323	0.85639	HSPA8
RIP-mediated NFkB Activation Via ZBP1 R-HSA-1810476	1/17	0.533547	0.743213	1.36323	0.85639	NFKB2
Removal Of Flap Intermediate From C-strand R-HSA-174437	1/17	0.533547	0.743213	1.36323	0.85639	PCNA
Synthesis Of PIPs At Golgi Membrane R-HSA-1660514	1/17	0.533547	0.743213	1.36323	0.85639	PI4KA
TNF Receptor Superfamily (TNFSF) Members Mediating Non-Canonical NF-kB Pathway R-HSA-5676594	1/17	0.533547	0.743213	1.36323	0.85639	CD40
Translesion Synthesis By POLI R-HSA-5656121	1/17	0.533547	0.743213	1.36323	0.85639	PCNA
Translesion Synthesis By POLK R-HSA-5655862	1/17	0.533547	0.743213	1.36323	0.85639	PCNA
Translocation Of ZAP-70 To Immunological Synapse R-HSA-202430	1/17	0.533547	0.743213	1.36323	0.85639	CD3D
Tristetraprolin (TTP, ZFP36) Binds And Destabilizes mRNA R-HSA-450513	1/17	0.533547	0.743213	1.36323	0.85639	YWHAB
Zinc Transporters R-HSA-435354	1/17	0.533547	0.743213	1.36323	0.85639	SLC30A3
Metabolism Of Lipids R-HSA-556833	32/732	0.533554	0.743213	0.99668	0.62611	HDAC3;SLC44A1;TAFAZZIN;MSMO1;NRF1;MTMR4;CYP19A1;NPAS2;MED17;MED12;HSD11B2;HSD17B2;CBR4;CERS3;OSBPL5;PLEKHA1;PLA2G4B;OSBPL2;PLA2G4C;ACSL5;PRKCA;CYP8B1;MED29;PLPP6;BDH2;AMACR;FABP6;PI4KA;DHCR7;PLA2R1;SEC24C;PLA1A
APC/C-mediated Degradation Of Cell Cycle Proteins R-HSA-174143	4/87	0.53365	0.743213	1.05108	0.660093	PSMA4;PSME1;BUB1B;ANAPC5
Oxygen-dependent Proline Hydroxylation Of Hypoxia-inducible Factor Alpha R-HSA-1234176	3/64	0.536673	0.746598	1.07263	0.667566	PSMA4;PSME1;RBX1
GPCR Downstream Signaling R-HSA-388396	27/619	0.539829	0.75016	0.99431	0.612995	PTGFR;GPSM2;CALCA;ITPR1;ITPR3;ADCY1;ADCY6;GRM2;TBXA2R;RPS6KA2;RHO;ADORA1;S1PR3;CCL19;GPR39;PRKCH;CCL21;RIPK2;PDE4D;TAS2R14;PRKCA;RHOA;CXCL10;CNOT6;PLCB4;GNB1;NMUR1
mRNA Splicing - Major Pathway R-HSA-72163	8/181	0.541735	0.751639	1.0084	0.618128	HSPA8;PPIL1;CPSF6;HNRNPUL1;PCF11;PRPF3;SYMPK;RBM5
Intraflagellar Transport R-HSA-5620924	2/41	0.542088	0.751639	1.11848	0.684873	KIF3A;KIF17
Cellular Responses To Stimuli R-HSA-8953897	32/736	0.546313	0.75488	0.990802	0.599002	NUP205;MRE11;HDAC3;NPRL2;GOSR2;NPAS2;PRDX5;CSRP1;RPS6KA2;TPR;NUP62;E2F2;HMOX2;SEC31A;DYNC1H1;HSPA8;CBX6;HSPA5;NUP133;PLA2G4B;HSPA2;RBX1;MAPK11;PSMA4;SCO2;ARTN;DDIT3;PSME1;COL4A6;ANAPC5;TP53;EZH2
p53-Dependent G1 DNA Damage Response R-HSA-69563	3/65	0.547235	0.75488	1.05527	0.636198	PSMA4;PSME1;TP53
Constitutive Signaling By Ligand-Responsive EGFR Cancer Variants R-HSA-1236382	1/18	0.554019	0.75488	1.28297	0.757667	PIGU
Defective GALNT12 Causes CRCS1 R-HSA-5083636	1/18	0.554019	0.75488	1.28297	0.757667	MUC1
Defective GALNT3 Causes HFTC R-HSA-5083625	1/18	0.554019	0.75488	1.28297	0.757667	MUC1
G Beta:Gamma Signaling Thru BTK R-HSA-8964315	1/18	0.554019	0.75488	1.28297	0.757667	GNB1
LDL Clearance R-HSA-8964038	1/18	0.554019	0.75488	1.28297	0.757667	AP2B1
Lewis Blood Group Biosynthesis R-HSA-9037629	1/18	0.554019	0.75488	1.28297	0.757667	FUT4
Metabolism Of Amine-Derived Hormones R-HSA-209776	1/18	0.554019	0.75488	1.28297	0.757667	DIDO1
Recycling Of Bile Acids And Salts R-HSA-159418	1/18	0.554019	0.75488	1.28297	0.757667	FABP6
Regulation Of NF-kappa B Signaling R-HSA-9758274	1/18	0.554019	0.75488	1.28297	0.757667	TP53
Regulation Of Signaling By CBL R-HSA-912631	1/18	0.554019	0.75488	1.28297	0.757667	FYN
Signaling By FLT3 Fusion Proteins R-HSA-9703465	1/18	0.554019	0.75488	1.28297	0.757667	MYO18A
Defective Pyroptosis R-HSA-9710421	2/42	0.555217	0.75488	1.09046	0.64162	POLA2;EZH2
Formation Of Incision Complex In GG-NER R-HSA-5696395	2/42	0.555217	0.75488	1.09046	0.64162	ERCC2;RBX1
Intra-Golgi Traffic R-HSA-6811438	2/42	0.555217	0.75488	1.09046	0.64162	COG5;GOSR2
PRC2 Methylates Histones And DNA R-HSA-212300	2/42	0.555217	0.75488	1.09046	0.64162	PHF1;EZH2
Signaling By SCF-KIT R-HSA-1433557	2/42	0.555217	0.75488	1.09046	0.64162	FYN;PRKCA
Activation Of NF-kappaB In B Cells R-HSA-1169091	3/66	0.557655	0.755745	1.03847	0.60648	PSMA4;FBXW11;PSME1
Integrin Cell Surface Interactions R-HSA-216083	3/66	0.557655	0.755745	1.03847	0.60648	ICAM4;ITGAV;CD47
RUNX1 Regulates Genes Involved In Megakaryocyte Differentiation And Platelet Function R-HSA-8936459	3/66	0.557655	0.755745	1.03847	0.60648	KMT2E;KMT2A;MYL9
MAPK6/MAPK4 Signaling R-HSA-5687128	4/90	0.560628	0.758957	1.01425	0.586946	PSMA4;CDC42EP5;PSME1;PRKCA
APC/C:Cdc20 Mediated Degradation Of Securin R-HSA-174154	3/67	0.567929	0.760161	1.02219	0.578311	PSMA4;PSME1;ANAPC5
G1/S DNA Damage Checkpoints R-HSA-69615	3/67	0.567929	0.760161	1.02219	0.578311	PSMA4;PSME1;TP53
Defensins R-HSA-1461973	2/43	0.568078	0.760161	1.0638	0.601579	DEFB105A;DEFA4
RND2 GTPase Cycle R-HSA-9696270	2/43	0.568078	0.760161	1.0638	0.601579	GOLGA3;FNBP1
SUMOylation Of Transcription Cofactors R-HSA-3899300	2/43	0.568078	0.760161	1.0638	0.601579	MBD1;PCGF2
Signaling By ROBO Receptors R-HSA-376176	9/209	0.569996	0.760161	0.981031	0.551463	PSMA4;PSME1;ZSWIM8;HOXA2;COL4A5;PRKCA;RHOA;BUB1B-PAK6;RBX1
Defective C1GALT1C1 Causes TNPS R-HSA-5083632	1/19	0.573592	0.760161	1.21163	0.673468	MUC1
Initiation Of Nuclear Envelope (NE) Reformation R-HSA-2995383	1/19	0.573592	0.760161	1.21163	0.673468	CCNB2
Nicotinamide Salvaging R-HSA-197264	1/19	0.573592	0.760161	1.21163	0.673468	CYP8B1
Nuclear Events Stimulated By ALK Signaling In Cancer R-HSA-9725371	1/19	0.573592	0.760161	1.21163	0.673468	RBX1
Other Semaphorin Interactions R-HSA-416700	1/19	0.573592	0.760161	1.21163	0.673468	SEMA7A
Phase 4 - Resting Membrane Potential R-HSA-5576886	1/19	0.573592	0.760161	1.21163	0.673468	KCNK17
Prostacyclin Signaling Thru Prostacyclin Receptor R-HSA-392851	1/19	0.573592	0.760161	1.21163	0.673468	GNB1
SUMOylation Of Transcription Factors R-HSA-3232118	1/19	0.573592	0.760161	1.21163	0.673468	TP53
Signaling By KIT In Disease R-HSA-9669938	1/19	0.573592	0.760161	1.21163	0.673468	FYN
Signaling By PDGFR In Disease R-HSA-9671555	1/19	0.573592	0.760161	1.21163	0.673468	WDR48
Signaling To RAS R-HSA-167044	1/19	0.573592	0.760161	1.21163	0.673468	MAPK11
Synthesis, Secretion, And Deacylation Of Ghrelin R-HSA-422085	1/19	0.573592	0.760161	1.21163	0.673468	PCSK1
Transcription Of E2F Targets Under Negative Control By DREAM Complex R-HSA-1362277	1/19	0.573592	0.760161	1.21163	0.673468	PCNA
Translesion Synthesis By POLH R-HSA-110320	1/19	0.573592	0.760161	1.21163	0.673468	PCNA
Cellular Responses To Stress R-HSA-2262752	31/722	0.575146	0.761418	0.97743	0.540647	NUP205;MRE11;HDAC3;NPRL2;GOSR2;NPAS2;PRDX5;RPS6KA2;TPR;NUP62;E2F2;HMOX2;SEC31A;DYNC1H1;HSPA8;CBX6;HSPA5;NUP133;PLA2G4B;HSPA2;RBX1;MAPK11;PSMA4;SCO2;ARTN;DDIT3;PSME1;COL4A6;ANAPC5;TP53;EZH2
TCR Signaling R-HSA-202403	5/116	0.57931	0.76311	0.982106	0.536148	PSMA4;FBXW11;RIPK2;PSME1;CD3D
Neutrophil Degranulation R-HSA-6798695	20/468	0.57989	0.76311	0.972818	0.530105	SNAP25;DYNC1H1;HSPA8;RAB5B;PTPRN2;DEFA4;TUBB;COMMD3;AMPD3;RHOA;HRNR;APRT;PYCARD;PRDX5;PTPRB;RAP2B;ITGAV;CD47;GYG1;HMOX2
Aspirin ADME R-HSA-9749641	2/44	0.580667	0.76311	1.03842	0.564464	ABCC2;GLYATL1
Collagen Chain Trimerization R-HSA-8948216	2/44	0.580667	0.76311	1.03842	0.564464	COL4A6;COL4A5
Interleukin-3, Interleukin-5 And GM-CSF Signaling R-HSA-512988	2/44	0.580667	0.76311	1.03842	0.564464	FYN;PRKCA
TGF-beta Receptor Signaling Activates SMADs R-HSA-2173789	2/44	0.580667	0.76311	1.03842	0.564464	ITGAV;MTMR4
TP53 Regulates Transcription Of Cell Death Genes R-HSA-5633008	2/44	0.580667	0.76311	1.03842	0.564464	CASP2;TP53
mRNA Splicing R-HSA-72172	8/189	0.591112	0.766409	0.963424	0.506521	HSPA8;PPIL1;CPSF6;HNRNPUL1;PCF11;PRPF3;SYMPK;RBM5
Aberrant Regulation Of Mitotic Exit In Cancer Due To RB1 Defects R-HSA-9687136	1/20	0.592308	0.766409	1.1478	0.601136	ANAPC5
Chaperone Mediated Autophagy R-HSA-9613829	1/20	0.592308	0.766409	1.1478	0.601136	HSPA8
Conversion From APC/C:Cdc20 To APC/C:Cdh1 In Late Anaphase R-HSA-176407	1/20	0.592308	0.766409	1.1478	0.601136	ANAPC5
Defective B3GALT6 Causes EDSP2 And SEMDJL1 R-HSA-4420332	1/20	0.592308	0.766409	1.1478	0.601136	B3GALT6
Diseases Associated With N-glycosylation Of Proteins R-HSA-3781860	1/20	0.592308	0.766409	1.1478	0.601136	ALG8
G Beta:Gamma Signaling Thru CDC42 R-HSA-8964616	1/20	0.592308	0.766409	1.1478	0.601136	GNB1
G Beta:Gamma Signaling Thru PLC Beta R-HSA-418217	1/20	0.592308	0.766409	1.1478	0.601136	GNB1
Phosphorylation Of CD3 And TCR Zeta Chains R-HSA-202427	1/20	0.592308	0.766409	1.1478	0.601136	CD3D
Phosphorylation Of APC/C R-HSA-176412	1/20	0.592308	0.766409	1.1478	0.601136	ANAPC5
Regulation Of Gene Expression In Beta Cells R-HSA-210745	1/20	0.592308	0.766409	1.1478	0.601136	NKX2-2
SHC-mediated cascade:FGFR1 R-HSA-5654688	1/20	0.592308	0.766409	1.1478	0.601136	FGF4
Signal Transduction By L1 R-HSA-445144	1/20	0.592308	0.766409	1.1478	0.601136	ITGAV
Signaling By Hippo R-HSA-2028269	1/20	0.592308	0.766409	1.1478	0.601136	YWHAB
TP53 Regulates Transcription Of Genes Involved In Cytochrome C Release R-HSA-6803204	1/20	0.592308	0.766409	1.1478	0.601136	TP53
Heme Signaling R-HSA-9707616	2/45	0.592984	0.766495	1.01422	0.530019	HDAC3;NPAS2
Chromosome Maintenance R-HSA-73886	5/118	0.594578	0.767314	0.964622	0.50151	BLM;POLA2;PCNA;CENPX;ITGB3BP
Neddylation R-HSA-8951664	10/237	0.594836	0.767314	0.960119	0.498752	PSMA4;FBXW11;PSME1;ASB6;COMMD3;COPS7A;DCAF7;FBXO9;RBX1;SOCS5
Chromatin Modifying Enzymes R-HSA-3247509	10/238	0.600185	0.773422	0.955857	0.487981	KMT2E;KAT2A;SMARCC2;HDAC3;KMT2A;ACTL6A;CHD4;JMJD6;EZH2;NFKB2
Signaling By TGFB Family Members R-HSA-9006936	5/119	0.602096	0.77509	0.95611	0.485072	ITGAV;MTMR4;ACVR1B;RHOA;ACVR2A
NR1H2 And NR1H3-mediated Signaling R-HSA-9024446	2/46	0.605028	0.777577	0.991117	0.498017	HDAC3;FABP6
Plasma Lipoprotein Assembly, Remodeling, And Clearance R-HSA-174824	3/71	0.607521	0.777577	0.961856	0.479359	PRKCA;ZDHHC8;AP2B1
Azathioprine ADME R-HSA-9748787	1/21	0.610203	0.777577	1.09035	0.538595	GUK1
CTLA4 Inhibitory Signaling R-HSA-389513	1/21	0.610203	0.777577	1.09035	0.538595	FYN
Deregulated CDK5 Triggers Neurodegenerative Pathways In Alzheimers Disease Models R-HSA-8862803	1/21	0.610203	0.777577	1.09035	0.538595	CDC25B
Intrinsic Pathway Of Fibrin Clot Formation R-HSA-140837	1/21	0.610203	0.777577	1.09035	0.538595	SERPINE2
PD-1 Signaling R-HSA-389948	1/21	0.610203	0.777577	1.09035	0.538595	CD3D
Presynaptic Function Of Kainate Receptors R-HSA-500657	1/21	0.610203	0.777577	1.09035	0.538595	GNB1
SHC1 Events In ERBB2 Signaling R-HSA-1250196	1/21	0.610203	0.777577	1.09035	0.538595	PRKCA
ZBP1(DAI) Mediated Induction Of Type I IFNs R-HSA-1606322	1/21	0.610203	0.777577	1.09035	0.538595	NFKB2
CDK-mediated Phosphorylation And Removal Of Cdc6 R-HSA-69017	3/72	0.617033	0.784691	0.947866	0.457661	PSMA4;PSME1;ANAPC5
Regulation Of RUNX2 Expression And Activity R-HSA-8939902	3/72	0.617033	0.784691	0.947866	0.457661	PSMA4;PSME1;RBX1
Metabolism Of Water-Soluble Vitamins And Cofactors R-HSA-196849	5/122	0.624164	0.78827	0.931448	0.439031	MTHFD1L;FPGS;MOCOS;MTHFR;CYP8B1
APC/C:Cdh1 Mediated Degradation Of Cdc20 And APC/C:Cdh1 Targets In Late Mitosis/Early G1 R-HSA-174178	3/73	0.626387	0.78827	0.934276	0.437042	PSMA4;PSME1;ANAPC5
Cellular Response To Hypoxia R-HSA-1234174	3/73	0.626387	0.78827	0.934276	0.437042	PSMA4;PSME1;RBX1
Extra-nuclear Estrogen Signaling R-HSA-9009391	3/73	0.626387	0.78827	0.934276	0.437042	KCNH8;GNB1;S1PR3
ADP Signaling Thru P2Y Purinoceptor 12 R-HSA-392170	1/22	0.627314	0.78827	1.03838	0.484204	GNB1
Blood Group Systems Biosynthesis R-HSA-9033658	1/22	0.627314	0.78827	1.03838	0.484204	FUT4
Common Pathway Of Fibrin Clot Formation R-HSA-140875	1/22	0.627314	0.78827	1.03838	0.484204	SERPINE2
FRS-mediated FGFR1 Signaling R-HSA-5654693	1/22	0.627314	0.78827	1.03838	0.484204	FGF4
Laminin Interactions R-HSA-3000157	1/22	0.627314	0.78827	1.03838	0.484204	ITGAV
Mitochondrial Calcium Ion Transport R-HSA-8949215	1/22	0.627314	0.78827	1.03838	0.484204	SPG7
Visual Phototransduction R-HSA-2187338	4/98	0.628167	0.78827	0.927543	0.43126	GNB1;RHO;PRKCA;PDE6A
Cross-presentation Of Soluble Exogenous Antigens (Endosomes) R-HSA-1236978	2/48	0.628301	0.78827	0.947925	0.440534	PSMA4;PSME1
Mitotic G1 Phase And G1/S Transition R-HSA-453279	6/147	0.628613	0.78827	0.927376	0.430525	ORC4;POLA2;PSMA4;PCNA;PSME1;E2F2
RHOA GTPase Cycle R-HSA-8980692	6/147	0.628613	0.78827	0.927376	0.430525	FMNL3;PLEKHG4;CCDC115;MYO9A;HMOX2;RHOA
Positive Epigenetic Regulation Of rRNA Expression R-HSA-5250913	3/74	0.635584	0.796219	0.921069	0.417439	KAT2A;TBP;CHD4
RMTs Methylate Histone Arginines R-HSA-3214858	2/49	0.639532	0.799574	0.927708	0.414703	SMARCC2;ACTL6A
Regulation Of Activated PAK-2p34 By Proteasome Mediated Degradation R-HSA-211733	2/49	0.639532	0.799574	0.927708	0.414703	PSMA4;PSME1
CD28 Dependent PI3K/Akt Signaling R-HSA-389357	1/23	0.643674	0.800776	0.991127	0.436654	FYN
Glutamate Neurotransmitter Release Cycle R-HSA-210500	1/23	0.643674	0.800776	0.991127	0.436654	SNAP25
RHOBTB1 GTPase Cycle R-HSA-9013422	1/23	0.643674	0.800776	0.991127	0.436654	PDE5A
RHOBTB2 GTPase Cycle R-HSA-9013418	1/23	0.643674	0.800776	0.991127	0.436654	DDX39B
Canonical Retinoid Cycle In Rods (Twilight Vision) R-HSA-2453902	1/23	0.643674	0.800776	0.991127	0.436654	RHO
Protein Ubiquitination R-HSA-8852135	3/76	0.653498	0.810551	0.89574	0.381062	PCNA;USP5;UBE2T
DNA Replication Pre-Initiation R-HSA-69002	5/127	0.659266	0.810551	0.893038	0.372065	ORC4;POLA2;PSMA4;PSME1;ANAPC5
APC/C:Cdc20 Mediated Degradation Of Cyclin B R-HSA-174048	1/24	0.659317	0.810551	0.947985	0.394884	ANAPC5
Aggrephagy R-HSA-9646399	1/24	0.659317	0.810551	0.947985	0.394884	DYNC1H1
Estrogen-dependent Nuclear Events Downstream Of ESR-membrane Signaling R-HSA-9634638	1/24	0.659317	0.810551	0.947985	0.394884	KCNH8
G-protein Activation R-HSA-202040	1/24	0.659317	0.810551	0.947985	0.394884	GNB1
Glycogen Metabolism R-HSA-8982491	1/24	0.659317	0.810551	0.947985	0.394884	GYG1
Signaling By EGFR In Cancer R-HSA-1643713	1/24	0.659317	0.810551	0.947985	0.394884	PIGU
Signaling By ERBB2 KD Mutants R-HSA-9664565	1/24	0.659317	0.810551	0.947985	0.394884	PIGU
Signaling By Erythropoietin R-HSA-9006335	1/24	0.659317	0.810551	0.947985	0.394884	PIGU
Synthesis Of Very Long-Chain Fatty acyl-CoAs R-HSA-75876	1/24	0.659317	0.810551	0.947985	0.394884	ACSL5
mTORC1-mediated Signaling R-HSA-166208	1/24	0.659317	0.810551	0.947985	0.394884	YWHAB
Ubiquitin Mediated Degradation Of Phosphorylated Cdc25A R-HSA-69601	2/51	0.661188	0.810551	0.889749	0.368104	PSMA4;PSME1
Ubiquitin-dependent Degradation Of Cyclin D R-HSA-75815	2/51	0.661188	0.810551	0.889749	0.368104	PSMA4;PSME1
Vpu Mediated Degradation Of CD4 R-HSA-180534	2/51	0.661188	0.810551	0.889749	0.368104	PSMA4;PSME1
ABC Transporter Disorders R-HSA-5619084	3/77	0.662216	0.811021	0.883589	0.364184	ABCC2;PSMA4;PSME1
FCERI Mediated NF-kB Activation R-HSA-2871837	3/78	0.670773	0.812355	0.871762	0.348116	PSMA4;FBXW11;PSME1
G Alpha (12/13) Signaling Events R-HSA-416482	3/78	0.670773	0.812355	0.871762	0.348116	TBXA2R;GNB1;RHOA
Nuclear Events Mediated By NFE2L2 R-HSA-9759194	3/78	0.670773	0.812355	0.871762	0.348116	PSMA4;PSME1;RBX1
Signaling By PDGF R-HSA-186797	2/52	0.671618	0.812355	0.871909	0.347077	PDGFRB;COL4A5
G1/S Transition R-HSA-69206	5/129	0.6727	0.812355	0.878542	0.348304	ORC4;POLA2;PSMA4;PCNA;PSME1
Antigen processing-Cross Presentation R-HSA-1236975	4/104	0.674243	0.812355	0.871615	0.343559	PSMA4;PSME1;ITGAV;TAPBP
Cargo Recognition For Clathrin-Mediated Endocytosis R-HSA-8856825	4/104	0.674243	0.812355	0.871615	0.343559	NECAP2;COPS7A;AP2B1;CD3D
Phase I - Functionalization Of Compounds R-HSA-211945	4/104	0.674243	0.812355	0.871615	0.343559	ALDH3A1;ACSS1;CYP19A1;CYP8B1
ADP Signaling Thru P2Y Purinoceptor 1 R-HSA-418592	1/25	0.674274	0.812355	0.908438	0.358033	GNB1
Assembly And Cell Surface Presentation Of NMDA Receptors R-HSA-9609736	1/25	0.674274	0.812355	0.908438	0.358033	KIF17
Basigin Interactions R-HSA-210991	1/25	0.674274	0.812355	0.908438	0.358033	PPIL2
Deadenylation Of mRNA R-HSA-429947	1/25	0.674274	0.812355	0.908438	0.358033	CNOT6
Gap Junction Trafficking R-HSA-190828	1/25	0.674274	0.812355	0.908438	0.358033	GJC2
Gap-filling DNA Repair Synthesis And Ligation In GG-NER R-HSA-5696397	1/25	0.674274	0.812355	0.908438	0.358033	PCNA
NOTCH3 Activation And Transmission Of Signal To Nucleus R-HSA-9013507	1/25	0.674274	0.812355	0.908438	0.358033	JAG1
Signaling By ERBB2 In Cancer R-HSA-1227990	1/25	0.674274	0.812355	0.908438	0.358033	PIGU
Termination Of O-glycan Biosynthesis R-HSA-977068	1/25	0.674274	0.812355	0.908438	0.358033	MUC1
Downstream Signaling Events Of B Cell Receptor (BCR) R-HSA-1168372	3/79	0.67917	0.816827	0.860246	0.332815	PSMA4;FBXW11;PSME1
Response To Elevated Platelet Cytosolic Ca2+ R-HSA-76005	5/130	0.679283	0.816827	0.871468	0.337011	HSPA5;WDR1;MMRN1;PRKCA;MAGED2
Deposition Of New CENPA-containing Nucleosomes At Centromere R-HSA-606279	2/53	0.681786	0.819054	0.854768	0.327409	CENPX;ITGB3BP
Downregulation Of TGF-beta Receptor Signaling R-HSA-2173788	1/26	0.688575	0.820777	0.872055	0.325391	MTMR4
HDMs Demethylate Histones R-HSA-3214842	1/26	0.688575	0.820777	0.872055	0.325391	JMJD6
Pyroptosis R-HSA-5620971	1/26	0.688575	0.820777	0.872055	0.325391	TP53
RNA Polymerase III Transcription Initiation From Type 2 Promoter R-HSA-76066	1/26	0.688575	0.820777	0.872055	0.325391	TBP
Signaling By ALK R-HSA-201556	1/26	0.688575	0.820777	0.872055	0.325391	HDAC3
Synthesis Of IP3 And IP4 In Cytosol R-HSA-1855204	1/26	0.688575	0.820777	0.872055	0.325391	PLCB4
TNFR1-induced NFkappaB Signaling Pathway R-HSA-5357956	1/26	0.688575	0.820777	0.872055	0.325391	TNF
Signaling By GPCR R-HSA-372790	28/689	0.68919	0.820777	0.921144	0.342886	PTGFR;GPSM2;CALCA;ITPR1;ITPR3;ADCY1;ADCY6;GRM2;TBXA2R;RPS6KA2;RHO;ADORA1;S1PR3;CCL19;GPR39;PRKCH;FZD2;CCL21;RIPK2;PDE4D;TAS2R14;PRKCA;RHOA;CXCL10;CNOT6;PLCB4;GNB1;NMUR1
Cellular Response To Chemical Stress R-HSA-9711123	7/182	0.690827	0.820777	0.871172	0.322217	PRDX5;PSMA4;HDAC3;SCO2;PSME1;HMOX2;RBX1
Degradation Of AXIN R-HSA-4641257	2/54	0.691695	0.820777	0.838286	0.309	PSMA4;PSME1
RHOJ GTPase Cycle R-HSA-9013409	2/54	0.691695	0.820777	0.838286	0.309	FMNL3;FNBP1
Regulation Of RUNX3 Expression And Activity R-HSA-8941858	2/54	0.691695	0.820777	0.838286	0.309	PSMA4;PSME1
SCF-beta-TrCP Mediated Degradation Of Emi1 R-HSA-174113	2/54	0.691695	0.820777	0.838286	0.309	PSMA4;PSME1
Phase II - Conjugation Of Compounds R-HSA-156580	4/107	0.695744	0.82092	0.846095	0.306941	SULT1A1;GLYATL1;AKR1A1;SULT1A2
Antigen Processing: Ubiquitination And Proteasome Degradation R-HSA-983168	12/307	0.698969	0.82092	0.885416	0.317111	PSMA4;HERC1;TRIM39;FBXW11;PSME1;ASB6;TRIM69;TRIM36;ANAPC5;UBAC1;FBXO9;RBX1
Hh Mutants Are Degraded By ERAD R-HSA-5362768	2/55	0.701348	0.82092	0.822426	0.291756	PSMA4;PSME1
Intrinsic Pathway For Apoptosis R-HSA-109606	2/55	0.701348	0.82092	0.822426	0.291756	YWHAB;TP53
Regulation Of Cholesterol Biosynthesis By SREBP (SREBF) R-HSA-1655829	2/55	0.701348	0.82092	0.822426	0.291756	DHCR7;SEC24C
ATF4 Activates Genes In Response To Endoplasmic Reticulum Stress R-HSA-380994	1/27	0.702248	0.82092	0.83847	0.296373	DDIT3
BMAL1:CLOCK,NPAS2 Activates Circadian Gene Expression R-HSA-1368108	1/27	0.702248	0.82092	0.83847	0.296373	NPAS2
CREB1 Phosphorylation Thru NMDA Receptor-Mediated Activation Of RAS Signaling R-HSA-442742	1/27	0.702248	0.82092	0.83847	0.296373	RPS6KA2
FLT3 Signaling In Disease R-HSA-9682385	1/27	0.702248	0.82092	0.83847	0.296373	MYO18A
G0 And Early G1 R-HSA-1538133	1/27	0.702248	0.82092	0.83847	0.296373	PCNA
Gap Junction Trafficking And Regulation R-HSA-157858	1/27	0.702248	0.82092	0.83847	0.296373	GJC2
RNA Pol II CTD Phosphorylation And Interaction With CE R-HSA-77075	1/27	0.702248	0.82092	0.83847	0.296373	ERCC2
RNA Polymerase III Transcription Initiation From Type 1 Promoter R-HSA-76061	1/27	0.702248	0.82092	0.83847	0.296373	TBP
RNA Polymerase III Transcription Initiation From Type 3 Promoter R-HSA-76071	1/27	0.702248	0.82092	0.83847	0.296373	TBP
Signaling By BMP R-HSA-201451	1/27	0.702248	0.82092	0.83847	0.296373	ACVR2A
Synthesis Of PC R-HSA-1483191	1/27	0.702248	0.82092	0.83847	0.296373	SLC44A1
PI Metabolism R-HSA-1483255	3/82	0.703404	0.821508	0.827448	0.291116	PLEKHA1;PI4KA;MTMR4
Cell Surface Interactions At Vascular Wall R-HSA-202733	5/134	0.704725	0.822288	0.844268	0.29545	PPIL2;GYPC;ITGAV;FYN;CD47
Metabolism Of Vitamins And Cofactors R-HSA-196854	7/186	0.71217	0.829273	0.851525	0.28904	GCHFR;COQ3;MTHFD1L;FPGS;MOCOS;MTHFR;CYP8B1
DAP12 Signaling R-HSA-2424491	1/28	0.715322	0.829273	0.807374	0.270488	FYN
Downstream Signal Transduction R-HSA-186763	1/28	0.715322	0.829273	0.807374	0.270488	PDGFRB
Keratan Sulfate Biosynthesis R-HSA-2022854	1/28	0.715322	0.829273	0.807374	0.270488	B4GALT4
MET Promotes Cell Motility R-HSA-8875878	1/28	0.715322	0.829273	0.807374	0.270488	PIGU
Molecules Associated With Elastic Fibres R-HSA-2129379	1/28	0.715322	0.829273	0.807374	0.270488	ITGAV
Prefoldin Mediated Transfer Of Substrate To CCT/TriC R-HSA-389957	1/28	0.715322	0.829273	0.807374	0.270488	TUBB
Assembly Of Pre-Replicative Complex R-HSA-68867	4/110	0.71621	0.829539	0.822019	0.274375	ORC4;PSMA4;PSME1;ANAPC5
Cyclin A:Cdk2-associated Events At S Phase Entry R-HSA-69656	3/84	0.718768	0.831737	0.806933	0.266462	PSMA4;PSME1;CDC25B
Assembly Of Collagen Fibrils And Other Multimeric Structures R-HSA-2022090	2/57	0.719901	0.832282	0.792436	0.260428	COL4A5;PLEC
Disassembly Of Destruction Complex And Recruitment Of AXIN To Membrane R-HSA-4641262	1/29	0.727823	0.836067	0.778498	0.247327	FZD2
G1/S-Specific Transcription R-HSA-69205	1/29	0.727823	0.836067	0.778498	0.247327	PCNA
HSF1 Activation R-HSA-3371511	1/29	0.727823	0.836067	0.778498	0.247327	COL4A6
PIWI-interacting RNA (piRNA) Biogenesis R-HSA-5601884	1/29	0.727823	0.836067	0.778498	0.247327	TDRD6
Peroxisomal Lipid Metabolism R-HSA-390918	1/29	0.727823	0.836067	0.778498	0.247327	AMACR
TNFs Bind Their Physiological Receptors R-HSA-5669034	1/29	0.727823	0.836067	0.778498	0.247327	TNFRSF18
mRNA Capping R-HSA-72086	1/29	0.727823	0.836067	0.778498	0.247327	ERCC2
Hh Mutants Abrogate Ligand Secretion R-HSA-5387390	2/58	0.728807	0.836216	0.778245	0.246195	PSMA4;PSME1
Respiratory Electron Transport, ATP Synthesis By Chemiosmotic Coupling, Heat Production By Uncoupling Proteins R-HSA-163200	4/112	0.729281	0.836216	0.806712	0.254675	NDUFB7;SCO2;UQCR11;ATP5F1D
Transport Of Small Molecules R-HSA-382551	28/706	0.736169	0.841774	0.897221	0.274815	SLC44A1;SLC22A2;ADCY1;ZDHHC8;SPG7;SLC6A1;ADCY6;SLC7A2;RYR3;FTMT;HEPH;MB;HMOX2;ABCC2;SLC30A3;SLC34A1;ANO9;PRKCA;AP2B1;TRPV1;TRPC4AP;CLCN6;PSMA4;FXYD2;FKBP1B;SCNN1A;GNB1;PSME1
B-WICH Complex Positively Regulates rRNA Expression R-HSA-5250924	2/59	0.737472	0.841774	0.764551	0.232827	KAT2A;TBP
O-linked Glycosylation Of Mucins R-HSA-913709	2/59	0.737472	0.841774	0.764551	0.232827	MUC1;GALNT10
RNA Polymerase I Promoter Escape R-HSA-73772	2/59	0.737472	0.841774	0.764551	0.232827	TBP;ERCC2
SCF(Skp2)-mediated Degradation Of P27/P21 R-HSA-187577	2/59	0.737472	0.841774	0.764551	0.232827	PSMA4;PSME1
Tight Junction Interactions R-HSA-420029	1/30	0.739775	0.843638	0.751614	0.226543	CLDN10
Macroautophagy R-HSA-1632852	4/114	0.741897	0.845292	0.791961	0.236436	HSPA8;DYNC1H1;PRKAA1;PRKAB1
Biological Oxidations R-HSA-211859	8/218	0.744723	0.846024	0.829108	0.244374	SULT1A1;ALDH3A1;GLYATL1;AKR1A1;ACSS1;CYP8B1;CYP19A1;SULT1A2
Regulation Of Expression Of SLITs And ROBOs R-HSA-9010553	6/167	0.745776	0.846024	0.811318	0.237984	PSMA4;PSME1;ZSWIM8;HOXA2;COL4A5;RBX1
Defective CFTR Causes Cystic Fibrosis R-HSA-5678895	2/60	0.745899	0.846024	0.75133	0.220264	PSMA4;PSME1
HDACs Deacetylate Histones R-HSA-3214815	2/60	0.745899	0.846024	0.75133	0.220264	HDAC3;CHD4
Meiotic Synapsis R-HSA-1221632	2/60	0.745899	0.846024	0.75133	0.220264	DIDO1;HSPA2
Diseases Associated With TLR Signaling Cascade R-HSA-5602358	1/31	0.751203	0.848981	0.726522	0.207843	NFKB2
Late Endosomal Microautophagy R-HSA-9615710	1/31	0.751203	0.848981	0.726522	0.207843	HSPA8
Nicotinate Metabolism R-HSA-196807	1/31	0.751203	0.848981	0.726522	0.207843	CYP8B1
Pyruvate Metabolism R-HSA-70268	1/31	0.751203	0.848981	0.726522	0.207843	PLPP6
ER-Phagosome Pathway R-HSA-1236974	3/89	0.754464	0.851138	0.759819	0.214077	PSMA4;PSME1;TAPBP
Peptide Hormone Metabolism R-HSA-2980736	3/89	0.754464	0.851138	0.759819	0.214077	PCSK1;KIF5C;GNB1
Respiratory Electron Transport R-HSA-611105	3/90	0.761148	0.855188	0.751046	0.204981	NDUFB7;SCO2;UQCR11
Regulation Of Actin Dynamics For Phagocytic Cup Formation R-HSA-2029482	2/62	0.762059	0.855188	0.72621	0.197334	CYFIP2;MYH9
Generation Of Second Messenger Molecules R-HSA-202433	1/32	0.76213	0.855188	0.703049	0.190975	CD3D
Nuclear Signaling By ERBB4 R-HSA-1251985	1/32	0.76213	0.855188	0.703049	0.190975	STMN1
RAF Activation R-HSA-5673000	1/32	0.76213	0.855188	0.703049	0.190975	YWHAB
Thrombin Signaling Thru Proteinase Activated Receptors (PARs) R-HSA-456926	1/32	0.76213	0.855188	0.703049	0.190975	GNB1
Signaling By TGF-beta Receptor Complex R-HSA-170834	3/91	0.767684	0.859253	0.742472	0.196293	ITGAV;MTMR4;RHOA
Cytosolic Sensors Of Pathogen-Associated DNA R-HSA-1834949	2/63	0.769799	0.859253	0.714267	0.18687	MRE11;NFKB2
Signaling By MET R-HSA-6806834	2/63	0.769799	0.859253	0.714267	0.18687	PIGU;RANBP10
Amino Acid Transport Across Plasma Membrane R-HSA-352230	1/33	0.772577	0.859253	0.681043	0.175725	SLC7A2
Formation Of Early Elongation Complex R-HSA-113418	1/33	0.772577	0.859253	0.681043	0.175725	ERCC2
Glucagon-type Ligand Receptors R-HSA-420092	1/33	0.772577	0.859253	0.681043	0.175725	GNB1
Keratan Sulfate/Keratin Metabolism R-HSA-1638074	1/33	0.772577	0.859253	0.681043	0.175725	B4GALT4
Signaling By WNT In Cancer R-HSA-4791275	1/33	0.772577	0.859253	0.681043	0.175725	PORCN
Signaling By High-Kinase Activity BRAF Mutants R-HSA-6802948	1/33	0.772577	0.859253	0.681043	0.175725	YWHAB
Striated Muscle Contraction R-HSA-390522	1/33	0.772577	0.859253	0.681043	0.175725	TPM2
Class B/2 (Secretin Family Receptors) R-HSA-373080	3/92	0.774073	0.859399	0.734091	0.187993	CALCA;FZD2;GNB1
Telomere Maintenance R-HSA-157579	3/92	0.774073	0.859399	0.734091	0.187993	BLM;POLA2;PCNA
Class A/1 (Rhodopsin-like Receptors) R-HSA-373076	12/327	0.775506	0.860231	0.828318	0.210591	PTGFR;GPR39;CXCL10;CNOT6;CCL21;RIPK2;TBXA2R;RHO;ADORA1;NMUR1;S1PR3;CCL19
Hedgehog Ligand Biogenesis R-HSA-5358346	2/64	0.777319	0.861483	0.70271	0.177015	PSMA4;PSME1
CD28 Co-Stimulation R-HSA-389356	1/34	0.782566	0.865014	0.660371	0.161908	FYN
Detoxification Of Reactive Oxygen Species R-HSA-3299685	1/34	0.782566	0.865014	0.660371	0.161908	PRDX5
Metabolic Disorders Of Biological Oxidation Enzymes R-HSA-5579029	1/34	0.782566	0.865014	0.660371	0.161908	CYP19A1
Cytochrome P450 - Arranged By Substrate Type R-HSA-211897	2/65	0.784624	0.865768	0.691519	0.167729	CYP19A1;CYP8B1
FOXO-mediated Transcription R-HSA-9614085	2/65	0.784624	0.865768	0.691519	0.167729	YWHAB;DDIT3
Beta Defensins R-HSA-1461957	1/35	0.792116	0.86834	0.640915	0.149363	DEFB105A
Negative Regulators Of DDX58/IFIH1 Signaling R-HSA-936440	1/35	0.792116	0.86834	0.640915	0.149363	TRIM25
Nucleotide Catabolism R-HSA-8956319	1/35	0.792116	0.86834	0.640915	0.149363	SCO2
Plasma Lipoprotein Clearance R-HSA-8964043	1/35	0.792116	0.86834	0.640915	0.149363	AP2B1
RNA Polymerase III Transcription Initiation R-HSA-76046	1/35	0.792116	0.86834	0.640915	0.149363	TBP
Regulation Of TNFR1 Signaling R-HSA-5357905	1/35	0.792116	0.86834	0.640915	0.149363	TNF
UCH Proteinases R-HSA-5689603	3/95	0.79238	0.86834	0.710041	0.165237	PSMA4;ACTL6A;PSME1
GPCR Ligand Binding R-HSA-500792	17/458	0.793059	0.86834	0.837404	0.194158	GPR39;PTGFR;CALCA;FZD2;CCL21;RIPK2;TAS2R14;CXCL10;GRM2;CNOT6;TBXA2R;GNB1;RHO;ADORA1;NMUR1;S1PR3;CCL19
Immunoregulatory Interactions Between A Lymphoid And A non-Lymphoid Cell R-HSA-198933	4/123	0.793162	0.86834	0.731718	0.169559	CD40;ICAM4;SLAMF6;CD3D
Apoptosis R-HSA-109581	6/178	0.79766	0.871132	0.758991	0.171587	MED12;PSMA4;YWHAB;PSME1;TP53;PLEC
RAC1 GTPase Cycle R-HSA-9013149	6/178	0.79766	0.871132	0.758991	0.171587	CYFIP2;PLEKHG4;FGD5;JAG1;DOCK9;BUB1B-PAK6
Regulation Of PTEN Stability And Activity R-HSA-8948751	2/67	0.798602	0.871132	0.670171	0.150716	PSMA4;PSME1
Activation Of ATR In Response To Replication Stress R-HSA-176187	1/36	0.801248	0.871132	0.62257	0.137952	ORC4
Glutathione Conjugation R-HSA-156590	1/36	0.801248	0.871132	0.62257	0.137952	AKR1A1
NR1H3 And NR1H2 Regulate Gene Expression Linked To Cholesterol Transport And Efflux R-HSA-9029569	1/36	0.801248	0.871132	0.62257	0.137952	HDAC3
RHO GTPases Activate WASPs And WAVEs R-HSA-5663213	1/36	0.801248	0.871132	0.62257	0.137952	CYFIP2
Regulation Of TP53 Degradation R-HSA-6804757	1/36	0.801248	0.871132	0.62257	0.137952	TP53
Platelet Degranulation R-HSA-114608	4/125	0.803371	0.872687	0.719548	0.157537	HSPA5;WDR1;MMRN1;MAGED2
Costimulation By CD28 Family R-HSA-388841	2/68	0.805285	0.874012	0.659983	0.142925	FYN;CD3D
Cooperation Of PDCL (PhLP1) And TRiC/CCT In G-protein Beta Folding R-HSA-6814122	1/37	0.809979	0.874583	0.605245	0.127553	GNB1
FLT3 Signaling R-HSA-9607240	1/37	0.809979	0.874583	0.605245	0.127553	FYN
Formation Of Fibrin Clot (Clotting Cascade) R-HSA-140877	1/37	0.809979	0.874583	0.605245	0.127553	SERPINE2
MAP2K And MAPK Activation R-HSA-5674135	1/37	0.809979	0.874583	0.605245	0.127553	YWHAB
Regulation Of TP53 Expression And Degradation R-HSA-6806003	1/37	0.809979	0.874583	0.605245	0.127553	TP53
SIRT1 Negatively Regulates rRNA Expression R-HSA-427359	1/37	0.809979	0.874583	0.605245	0.127553	TBP
Circadian Clock R-HSA-400253	2/69	0.811771	0.875766	0.650098	0.13557	HDAC3;NPAS2
Autophagy R-HSA-9612973	4/128	0.817914	0.879824	0.702029	0.141106	HSPA8;DYNC1H1;PRKAA1;PRKAB1
Apoptotic Cleavage Of Cellular Proteins R-HSA-111465	1/38	0.818327	0.879824	0.588856	0.118062	PLEC
Assembly Of ORC Complex At Origin Of Replication R-HSA-68616	1/38	0.818327	0.879824	0.588856	0.118062	ORC4
Signaling By RAF1 Mutants R-HSA-9656223	1/38	0.818327	0.879824	0.588856	0.118062	YWHAB
KEAP1-NFE2L2 Pathway R-HSA-9755511	3/100	0.820135	0.881015	0.673264	0.133499	PSMA4;PSME1;RBX1
Elastic Fibre Formation R-HSA-1566948	1/39	0.826308	0.88689	0.57333	0.109384	ITGAV
Base Excision Repair R-HSA-73884	2/72	0.830083	0.889679	0.622139	0.115861	PCNA;APEX1
ABC-family Proteins Mediated Transport R-HSA-382556	3/102	0.83032	0.889679	0.659594	0.122648	ABCC2;PSMA4;PSME1
Collagen Degradation R-HSA-1442490	1/40	0.833939	0.891282	0.5586	0.101439	TMPRSS6
Diseases Associated With Glycosaminoglycan Metabolism R-HSA-3560782	1/40	0.833939	0.891282	0.5586	0.101439	B3GALT6
RNA Polymerase III Abortive And Retractive Initiation R-HSA-749476	1/40	0.833939	0.891282	0.5586	0.101439	TBP
RHOC GTPase Cycle R-HSA-9013106	2/73	0.835821	0.892535	0.613344	0.109998	FMNL3;RHOA
ESR-mediated Signaling R-HSA-8939211	6/188	0.837379	0.893441	0.71691	0.127236	GTF2A1;TBP;KCNH8;GNB1;S1PR3;GATA3
Negative Regulation Of MAPK Pathway R-HSA-5675221	1/41	0.841236	0.89468	0.544606	0.0941533	YWHAB
Paradoxical Activation Of RAF Signaling By Kinase Inactive BRAF R-HSA-6802955	1/41	0.841236	0.89468	0.544606	0.0941533	YWHAB
Cell Death Signaling Via NRAGE, NRIF And NADE R-HSA-204998	2/74	0.841383	0.89468	0.604794	0.104453	CASP2;ITGB3BP
NoRC Negatively Regulates rRNA Expression R-HSA-427413	2/74	0.841383	0.89468	0.604794	0.104453	TBP;ERCC2
Activation Of Gene Expression By SREBF (SREBP) R-HSA-2426168	1/42	0.848212	0.898905	0.531295	0.0874644	DHCR7
Deactivation Of Beta-Catenin Transactivating Complex R-HSA-3769402	1/42	0.848212	0.898905	0.531295	0.0874644	TCF7L1
RND1 GTPase Cycle R-HSA-9696273	1/42	0.848212	0.898905	0.531295	0.0874644	RASAL2
RND3 GTPase Cycle R-HSA-9696264	1/42	0.848212	0.898905	0.531295	0.0874644	RASAL2
Protein Localization R-HSA-9609507	5/164	0.850806	0.900895	0.68389	0.110497	CS;AMACR;TAFAZZIN;IDH3G;FXN
DAP12 Interactions R-HSA-2172127	1/43	0.854882	0.903691	0.518618	0.0813153	FYN
Formation Of HIV-1 Elongation Complex Containing HIV-1 Tat R-HSA-167200	1/43	0.854882	0.903691	0.518618	0.0813153	ERCC2
Influenza Viral RNA Transcription And Replication R-HSA-168273	4/137	0.856303	0.904434	0.654213	0.101489	NUP205;NUP133;TPR;NUP62
Negative Epigenetic Regulation Of rRNA Expression R-HSA-5250941	2/77	0.857058	0.904473	0.58051	0.0895433	TBP;ERCC2
Sphingolipid De Novo Biosynthesis R-HSA-1660661	1/44	0.861259	0.907385	0.506531	0.0756556	CERS3
TNF Signaling R-HSA-75893	1/44	0.861259	0.907385	0.506531	0.0756556	TNF
Peptide Ligand-Binding Receptors R-HSA-375276	6/196	0.864419	0.909953	0.686434	0.100012	CXCL10;CNOT6;CCL21;RIPK2;NMUR1;CCL19
Amyloid Fiber Formation R-HSA-977225	2/79	0.866708	0.91076	0.565373	0.0808781	CALCA;SNCA
ERCC6 (CSB) And EHMT2 (G9a) Positively Regulate rRNA Expression R-HSA-427389	1/45	0.867356	0.91076	0.494993	0.0704404	CHD4
Formation Of HIV Elongation Complex In Absence Of HIV Tat R-HSA-167152	1/45	0.867356	0.91076	0.494993	0.0704404	ERCC2
TCF Dependent Signaling In Response To WNT R-HSA-201681	6/198	0.870566	0.913368	0.679212	0.0941471	TCF7L1;FZD2;PSMA4;PSME1;RBX1;DACT1
Senescence-Associated Secretory Phenotype (SASP) R-HSA-2559582	2/81	0.875757	0.91805	0.551002	0.0730995	RPS6KA2;ANAPC5
Cyclin D Associated Events In G1 R-HSA-69231	1/47	0.878759	0.919665	0.473422	0.0611873	E2F2
SARS-CoV-2 Modulates Host Translation Machinery R-HSA-9754678	1/47	0.878759	0.919665	0.473422	0.0611873	GEMIN8
Cyclin E Associated Events During G1/S Transition R-HSA-69202	2/82	0.880066	0.920268	0.544086	0.0695116	PSMA4;PSME1
Selenoamino Acid Metabolism R-HSA-2408522	3/114	0.881558	0.921063	0.587915	0.0741155	EPRS1;SECISBP2;SCLY
Retrograde Transport At Trans-Golgi-Network R-HSA-6811440	1/48	0.884088	0.922941	0.463325	0.0570811	COG5
Signaling By Nuclear Receptors R-HSA-9006931	8/260	0.887858	0.926109	0.689389	0.081998	GTF2A1;TBP;HDAC3;FABP6;KCNH8;GNB1;S1PR3;GATA3
Signaling By EGFR R-HSA-177929	1/49	0.889183	0.926723	0.453648	0.0532822	PIGU
Programmed Cell Death R-HSA-5357801	6/208	0.897907	0.933562	0.645247	0.0694856	MED12;PSMA4;YWHAB;PSME1;TP53;PLEC
Estrogen-dependent Gene Expression R-HSA-9018519	3/119	0.898494	0.933562	0.562426	0.0601994	GTF2A1;TBP;GATA3
Complex I Biogenesis R-HSA-6799198	1/51	0.898711	0.933562	0.435457	0.046504	NDUFB7
Synthesis Of PIPs At Plasma Membrane R-HSA-1660499	1/51	0.898711	0.933562	0.435457	0.046504	PLEKHA1
Apoptotic Execution Phase R-HSA-75153	1/52	0.903164	0.935871	0.426896	0.0434799	PLEC
RHOD GTPase Cycle R-HSA-9013405	1/52	0.903164	0.935871	0.426896	0.0434799	BUB1B-PAK6
Signaling By Non-Receptor Tyrosine Kinases R-HSA-9006927	1/52	0.903164	0.935871	0.426896	0.0434799	RHOA
Antimicrobial Peptides R-HSA-6803157	2/89	0.906561	0.937848	0.500125	0.0490605	DEFB105A;DEFA4
Interferon Gamma Signaling R-HSA-877300	2/89	0.906561	0.937848	0.500125	0.0490605	TRIM25;TRIM38
Ion Transport By P-type ATPases R-HSA-936837	1/53	0.907421	0.937967	0.418664	0.0406726	FXYD2
Amino Acids Regulate mTORC1 R-HSA-9639288	1/55	0.915383	0.944645	0.403116	0.0356406	NPRL2
ECM Proteoglycans R-HSA-3000178	1/55	0.915383	0.944645	0.403116	0.0356406	ITGAV
Post-translational Modification: Synthesis Of GPI-anchored Proteins R-HSA-163125	2/92	0.91615	0.944646	0.483378	0.0423319	PIGU;LSAMP
Influenza Infection R-HSA-168255	4/157	0.917602	0.944646	0.568096	0.0488512	NUP205;NUP133;TPR;NUP62
Deadenylation-dependent mRNA Decay R-HSA-429914	1/56	0.919104	0.944646	0.395766	0.0333854	CNOT6
E3 Ubiquitin Ligases Ubiquitinate Target Proteins R-HSA-8866654	1/56	0.919104	0.944646	0.395766	0.0333854	PCNA
RAC3 GTPase Cycle R-HSA-9013423	2/93	0.919135	0.944646	0.478041	0.0403093	IL32;JAG1
SLC-mediated Transmembrane Transport R-HSA-425407	7/247	0.920184	0.944952	0.633051	0.0526585	SLC44A1;SLC30A3;HEPH;SLC34A1;SLC22A2;SLC6A1;SLC7A2
Regulated Necrosis R-HSA-5218859	1/57	0.922661	0.945953	0.388678	0.0312861	TP53
Signaling By ERBB4 R-HSA-1236394	1/57	0.922661	0.945953	0.388678	0.0312861	STMN1
Formation Of RNA Pol II Elongation Complex R-HSA-112382	1/58	0.926062	0.948667	0.381839	0.0293308	ERCC2
Arachidonic Acid Metabolism R-HSA-2142753	1/59	0.929313	0.94968	0.375236	0.0275083	CYP8B1
RHOQ GTPase Cycle R-HSA-9013406	1/59	0.929313	0.94968	0.375236	0.0275083	FNBP1
Transcriptional Regulation Of Granulopoiesis R-HSA-9616222	1/59	0.929313	0.94968	0.375236	0.0275083	KMT2A
Formation Of beta-catenin:TCF Transactivating Complex R-HSA-201722	1/60	0.932422	0.951312	0.368857	0.0258089	TCF7L1
rRNA Modification In Nucleus And Cytosol R-HSA-6790901	1/60	0.932422	0.951312	0.368857	0.0258089	NOP56
Cell-cell Junction Organization R-HSA-421270	1/61	0.935394	0.953572	0.36269	0.0242231	CLDN10
Sensory Perception R-HSA-9709957	20/616	0.938726	0.956194	0.725451	0.0458713	OR2A1;SNAP25;OR4D1;TAS2R14;PRKCA;ITPR3;CACNB2;OR5AC2;KCNMB1;SCNN1A;GNB1;RHO;OR2A12;CHRNA10;MYH9;OR8B2;FSCN2;PDE6A;KIF20B;OR2A14
Peroxisomal Protein Import R-HSA-9033241	1/63	0.940952	0.957687	0.350954	0.02136	AMACR
Transport Of Inorganic Cations/Anions And Amino Acids/Oligopeptides R-HSA-425393	2/104	0.945993	0.962039	0.426241	0.0236651	SLC34A1;SLC7A2
Fatty Acid Metabolism R-HSA-8978868	4/173	0.94853	0.963841	0.513878	0.0271545	AMACR;ACSL5;CYP8B1;CBR4
HATs Acetylate Histones R-HSA-3214847	2/106	0.949859	0.964414	0.418	0.0215025	KAT2A;ACTL6A
RHOB GTPase Cycle R-HSA-9013026	1/69	0.954921	0.968241	0.319887	0.0147552	MYO9A
Degradation Of Extracellular Matrix R-HSA-1474228	2/109	0.955167	0.968241	0.406216	0.0186326	TMPRSS6;CAPN10
Metabolism Of Amino Acids And Derivatives R-HSA-71291	10/364	0.96048	0.972843	0.611531	0.0246585	DIDO1;PSMA4;EPRS1;SLC44A1;SECISBP2;NPRL2;PSME1;PYCR1;SCLY;AZIN1
Formation Of Cornified Envelope R-HSA-6809371	1/74	0.964004	0.975628	0.297898	0.0109208	LCE3A
Mitochondrial Translation Elongation R-HSA-5389840	1/82	0.97489	0.984271	0.268363	0.00682474	MRPL24
Mitochondrial Translation Initiation R-HSA-5368286	1/82	0.97489	0.984271	0.268363	0.00682474	MRPL24
Mitochondrial Translation Termination R-HSA-5419276	1/82	0.97489	0.984271	0.268363	0.00682474	MRPL24
rRNA Processing R-HSA-72312	4/199	0.976981	0.985592	0.44475	0.0103574	NOP56;EXOSC10;TSR1;TFB1M
Mitochondrial Translation R-HSA-5368287	1/88	0.980835	0.988688	0.249777	0.0048335	MRPL24
Sphingolipid Metabolism R-HSA-428157	1/89	0.981679	0.988747	0.246926	0.00456593	CERS3
Selenocysteine Synthesis R-HSA-2408557	1/90	0.982486	0.988769	0.244138	0.00431381	SECISBP2
Major Pathway Of rRNA Processing In Nucleolus And Cytosol R-HSA-6791226	3/179	0.986335	0.991849	0.36952	0.00508448	NOP56;EXOSC10;TSR1
Response Of EIF2AK4 (GCN2) To Amino Acid Deficiency R-HSA-9633012	1/98	0.987785	0.992515	0.223909	0.00275181	DDIT3
rRNA Processing In Nucleus And Cytosol R-HSA-8868773	3/189	0.99042	0.994369	0.349469	0.00336397	NOP56;EXOSC10;TSR1
Cellular Response To Starvation R-HSA-9711097	2/153	0.991758	0.994919	0.287183	0.00237669	DDIT3;NPRL2
Translation R-HSA-72766	5/281	0.994914	0.99729	0.391549	0.00199662	AARS1;EPRS1;MARS2;MRPL24;EARS2
Olfactory Signaling Pathway R-HSA-381753	7/401	0.998929	0.999572	0.38247	0.000409851	OR2A1;OR4D1;OR5AC2;GNB1;OR2A12;OR8B2;OR2A14
Keratinization R-HSA-6805567	2/208	0.999095	0.999572	0.209897	0.000189946	LCE3A;KRTAP5-2
Expression And Translocation Of Olfactory Receptors R-HSA-9752946	6/393	0.999572	0.999572	0.333502	0.000142716	OR2A1;OR4D1;OR5AC2;OR2A12;OR8B2;OR2A14

## Sheet: WikiPathway
Term	Overlap	P-value	AdjustedpP-value	Odds Ratio	Combined Score	Genes
MAPK Signaling WP382	25/246	8.63756e-05	0.0519117	2.50967	23.4825	PTPRR;TNF;CACNA1H;FGF4;CACNA1I;FGF7;MKNK1;STMN1;FLNB;MAP4K1;PDGFRB;HSPA8;PLA2G4B;PLA2G4C;PRKCA;HSPA2;CDC25B;NFKB2;CACNB2;MAPK11;DDIT3;RASA1;FGF18;TP53;FGF12
PKC Gamma Calcium Signaling In Ataxia WP4760	6/22	0.000284885	0.0856081	8.22632	67.1549	PLCB4;ITPR1;HOMER3;RYR3;GRIA3;GRIA4
Myometrial Relaxation And Contraction Pathways WP289	16/156	0.00139777	0.274924	2.51973	16.5619	GUCY1A1;CALCA;PRKCH;YWHAB;PDE4D;ITPR1;ADCY3;PRKCA;ITPR3;ADCY1;RYR3;ADCY6;ACTA2;ACTA1;GNB1;RGS9
MFAP5 Mediated Ovarian Cancer Cell Motility And Invasiveness WP3301	4/13	0.00191081	0.274924	9.73094	60.9179	TNNC1;ITPR3;ITGAV;RYR3
DNA IR Double Strand Breaks And Cellular Response Via ATM WP3959	8/55	0.0025899	0.274924	3.73645	22.2548	MDC1;RASSF1;BLM;MRE11;PCNA;ACTL6A;NABP2;TP53
Thermogenesis WP4321	12/108	0.00274492	0.274924	2.74957	16.217	MAPK11;PRKAA1;SMARCC2;RPS6KA2;ACTL6A;ACSL5;ADCY3;SIRT6;ADCY1;PRKAB1;ADCY6;CREB5
ADHD And Autism ASD Pathways WP5420	28/370	0.00370925	0.274924	1.8111	10.1366	PNMT;CNTNAP2;SNAP25;CNTNAP1;PRKAA1;NRXN1;NRXN2;KCNA5;SLC6A1;TNF;DGUOK;GRM2;MTHFD1L;HOMER3;GRIA3;GRIA4;PDGFRB;GABBR1;MOCOS;AKR1A1;MTHFR;PRKCA;SORBS2;RHOA;APRT;SLC25A39;CNTN1;ADGRL3
Pentose Phosphate Pathway In Senescent Cells WP5043	3/8	0.00398679	0.274924	13.1245	72.5097	RPE;PGLS;TP53
Primary Focal Segmental Glomerulosclerosis FSGS WP2572	9/72	0.00411699	0.274924	3.13693	17.23	KIRREL2;PCNA;JAG1;WT1;ILK;MYH9;COL4A5;ITGAV;FYN
Calcium Regulation In Cardiac Cells WP536	14/151	0.00667692	0.401283	2.24818	11.2613	PRKCH;YWHAB;ITPR1;ADCY3;PRKCA;ITPR3;ADCY1;RYR3;ADCY6;GJC2;FXYD2;GNB1;ORAI1;RGS9
Phosphodiesterases In Neuronal Function WP4222	7/54	0.00894999	0.457047	3.26564	15.4011	GUCY1A1;PDE4D;ADCY3;PDE5A;ADCY1;PDE6A;ADCY6
Sterol Regulatory Element Binding Proteins SREBP Signaling WP1982	8/69	0.0104177	0.457047	2.87679	13.1304	PRKAA1;RNF139;AMFR;ACSS1;PRKAB1;SEC23B;SEC24C;SEC31A
White Fat Cell Differentiation WP4149	5/32	0.0120609	0.457047	4.05539	17.9158	TCF7L1;DDIT3;GATA3;NR2F2;ZNF423
Acute Viral Myocarditis WP4298	9/85	0.012066	0.457047	2.59858	11.4789	PYCARD;PTCRA;ENDOG;RASA1;ILK;CASP2;FYN;TNF;NFKB2
Axon Guidance WP5289	8/72	0.0133068	0.457047	2.74151	11.8419	SEMA6C;SEMA7A;DPYSL2;RASA1;BOC;ILK;PRKCA;FYN
Sildenafil Treatment WP5294	4/22	0.0142892	0.457047	4.86318	20.66	GUCY1A1;PDE4D;PDE5A;NRF1
Envelope Proteins And Potential Roles In EDMD Physiopathology WP4535	6/46	0.0146657	0.457047	3.28639	13.876	TAFAZZIN;ADCY3;ADCY1;ADCY6;RHOA;PLEC
Ras Signaling WP4223	15/184	0.0157113	0.457047	1.95163	8.10586	PDGFRB;RAB5B;RASA4B;PLA2G4B;PLA2G4C;PRKCA;RASAL2;RHOA;BUB1B-PAK6;RASSF1;RASA4;JMJD7-PLA2G4B;RASA1;GNB1;PLA1A
Purine Metabolism And Related Disorders WP4224	4/23	0.0167103	0.457047	4.60698	18.8505	DGUOK;MOCOS;PFAS;APRT
Unfolded Protein Response WP4925	4/23	0.0167103	0.457047	4.60698	18.8505	HSPA5;DDIT3;CASP2;TP53
Male Steroid Hormones In Cardiomyocyte Energy Metabolism WP5320	3/13	0.0172823	0.457047	6.56053	26.6231	SULT1A1;HSD17B2;CYP19A1
Pleural Mesothelioma WP5087	29/437	0.0179638	0.457047	1.56867	6.30511	PRKAA1;YWHAB;ITPR3;FGF4;FGF7;PORCN;RASSF1;CDH3;MKNK1;ITGAV;MAP4K1;PDGFRB;TCF7L1;FZD2;HGF;PRKAB1;BUB1B-PAK6;ACTA2;CXCL10;ACTA1;PLCB4;DDIT3;FGF18;COL4A6;COL4A5;CD47;TP53;FGF12;EZH2
Joubert Syndrome WP4656	8/76	0.0180165	0.457047	2.57971	10.3613	MRE11;TCTN3;ARL3;PDE6A;ZNF423;PIBF1;RAB8A;RHOA
G Protein Signaling WP35	9/91	0.0182515	0.457047	2.40768	9.63917	PRKCH;PDE4D;GNB1;ITPR1;ADCY3;PRKCA;ADCY1;RHOA;ADCY6
Effects Of MFN2 Mutation WP5443	4/24	0.019373	0.465727	4.3764	17.26	DYNC1H1;TRAK1;TP53;SNCA
Androgen Receptor Network In Prostate Cancer WP2263	10/109	0.0214195	0.495119	2.2164	8.51862	MAP4K1;BLM;MRE11;SMARCC2;HGF;RASA1;ACTL6A;HSD17B2;TP53;CDC25B
Toll Like Receptor Signaling WP75	9/95	0.0234861	0.513065	2.29521	8.61013	IFNA4;MAPK11;CXCL10;CD40;IRAK1;IFNA17;TLR7;TNF;IFNA10
Striated Muscle Contraction Pathway WP383	5/38	0.0242619	0.513065	3.317	12.3354	ACTA2;ACTA1;TNNC1;TPM2;MYL9
DNA IR Damage And Cellular Response Via ATR WP4016	8/81	0.0254477	0.513065	2.40238	8.81946	RECQL4;MDC1;MRE11;SMARCC2;PCNA;RPA2;TP53;CLK2
Arylamine Metabolism WP694	2/6	0.0256106	0.513065	10.9251	40.0379	SULT1A1;SULT1A2
Hippo Signaling Regulation WP4540	9/98	0.0280582	0.543967	2.2175	7.92416	PDGFRB;PRKAA1;TCF7L1;CDH3;PRKCH;PLCB4;PRKCA;PRKAB1;RHOA
ATM Signaling WP2516	5/40	0.0296237	0.556371	3.12713	11.0049	MDC1;MRE11;TLK1;CASP2;TP53
Major Receptors Targeted By Epinephrine And Norepinephrine WP4589	3/16	0.0306987	0.559089	5.04577	17.5771	ADCY3;ADCY1;ADCY6
Glycosaminoglycan Synthesis In Fibroblasts WP5395	5/41	0.0325629	0.562182	3.04011	10.4111	B3GAT2;GLCE;DSE;B3GALT6;HS6ST2
Pentose Phosphate Metabolism WP134	2/7	0.0348247	0.562182	8.73966	29.3428	RPE;PGLS
Amplification And Expansion Of Oncogenic Pathways WP3678	3/17	0.036092	0.562182	4.68511	15.5625	TCF7L1;JAG1;CYTIP
NRXN1 Deletion Syndrome WP5398	3/17	0.036092	0.562182	4.68511	15.5625	NRXN1;GRIA3;GRIA4
22Q11 2 Copy Number Variation Syndrome WP4657	10/119	0.0364056	0.562182	2.012	6.66582	ACTA2;HDAC3;NPRL2;HAND2;LRRC74B;ZNF74;PI4KA;ZDHHC8;TP53;RBX1
Disorders Of Bile Acid Synthesis And Biliary Transport WP5176	4/29	0.036481	0.562182	3.50021	11.5891	ABCC2;AMACR;FABP6;CYP8B1
N Glycan Biosynthesis WP5153	6/57	0.0380416	0.564739	2.57608	8.42139	GMPPB;ALG8;DAD1;GMPPA;MGAT4B;STT3A
Ectoderm Differentiation WP2858	11/138	0.0404819	0.564739	1.89991	6.09282	PAN2;PTPRB;TCF7L1;BOC;PI4KA;FYN;NR2F2;BCOR;GAS2L1;YJU2B;SNCA
TCA Cycle Aka Krebs Or Citric Acid Cycle WP78	3/18	0.041937	0.564739	4.37254	13.8679	CS;IDH3G;SUCLG2
Vasopressin Regulated Water Reabsorption WP5085	5/44	0.0424407	0.564739	2.80581	8.86537	DYNC1H1;RAB5B;ADCY3;ADCY6;CREB5
Extrafollicular And Follicular B Cell Activation By SARS CoV 2 WP5218	7/74	0.0432166	0.564739	2.28842	7.18914	PTCRA;HSPA8;CD40;CCL21;TLR7;CCL19;TNF
Burn Wound Healing WP5055	7/74	0.0432166	0.564739	2.28842	7.18914	PDGFRB;KRT222;ACTA1;HGF;TNF;TP53;BRD4
Markers Of Kidney Cell Lineage WP5236	6/59	0.0439361	0.564739	2.47861	7.7457	PDGFRB;ACTA2;FGF7;JAG1;WT1;AP2B1
Neuroinflammation And Glutamatergic Signaling WP5083	11/140	0.0441721	0.564739	1.87026	5.83457	GRM2;PLCB4;ADCY3;PRKCA;GRIK1;ADCY1;DISC1;TNF;GRIA3;GRIA4;NFKB2
ApoE And miR 146 In Inflammation And Atherosclerosis WP3926	2/8	0.045104	0.564739	7.28267	22.5674	IRAK1;NFKB2
Small Ligand GPCRs WP247	3/19	0.0482251	0.586276	4.09904	12.4278	PTGFR;TBXA2R;S1PR3
Non Genomic Actions Of 1 25 Dihydroxyvitamin D3 WP4341	7/76	0.048775	0.586276	2.22186	6.7112	MAPK11;CD40;PRKCH;PLCB4;PRKCA;TNF;NFKB2
Prion Disease Pathway WP3995	4/32	0.0498735	0.587726	3.12469	9.36866	TBP;HSPA5;RFX5;FYN
Fluoropyrimidine Activity WP1601	4/33	0.0548611	0.604623	3.01679	8.75759	FPGS;ERCC2;MTHFR;TP53
Hereditary Leiomyomatosis And Renal Cell Carcinoma Pathway WP4206	3/20	0.0549455	0.604623	3.85772	11.1928	PRKAA1;PRKAB1;TP53
Lung Pathology Of COVID 19 WP5146	3/20	0.0549455	0.604623	3.85772	11.1928	CXCL10;TLR7;TNF
Altered Glycosylation Of MUC1 In Tumor Microenvironment WP4480	2/9	0.0563376	0.604623	6.24196	17.9543	MUC1;TNF
Acetaminophen In Analgesia And Antipyresis WP5444	2/9	0.0563376	0.604623	6.24196	17.9543	TRPV1;CACNA1H
Microtubule Cytoskeleton Regulation WP2038	5/48	0.0581343	0.61296	2.54427	7.23845	DPYSL2;STMN1;RHO;PRKCA;KIF2C
G1 To S Cell Cycle Control WP45	6/64	0.061053	0.621895	2.26434	6.33113	ORC4;POLA2;PCNA;E2F2;RPA2;TP53
VEGFA VEGFR2 Signaling WP3888	26/430	0.0619124	0.621895	1.41561	3.93829	PRKAA1;HBD;GIGYF2;FGD5;CSRP1;MKNK1;FLNB;ITGAV;FYN;MYH11;BRD4;RBM39;JAG1;SDF2L1;FBXW11;MICAL2;PRKCA;SND1;RHOA;FMNL3;MYO1C;EPRS1;P4HA2;GIPC1;RCAN2;MYH9
17P13 3 YWHAE Copy Number Variation WP5376	3/21	0.062086	0.621895	3.64321	10.1253	DYNC1H1;YWHAB;DISC1
Leptin And Adiponectin WP3934	2/10	0.0684222	0.628173	5.46143	14.6479	PRKAA1;PRKAB1
Hippo YAP Signaling WP4537	3/22	0.0696329	0.628173	3.45128	9.19601	MAP4K1;CXCL10;RASSF1
Osteoblast Differentiation And Related Diseases WP4787	9/118	0.0749029	0.628173	1.80871	4.68739	MAPK11;FGF7;PRKCH;JAG1;FZD2;FGF18;HEY2;PRKCA;FGF4
Measles Virus Infection WP4630	10/136	0.0761511	0.628173	1.73898	4.47794	HSPA8;IFNA4;IRAK1;IFNA17;TLR7;HSPA2;TP53;CD3D;IFNA10;NFKB2
Breast Cancer Pathway WP4262	11/154	0.0765123	0.628173	1.68591	4.33331	HEYL;FGF7;TCF7L1;MRE11;FZD2;FGF18;HEY2;E2F2;TP53;FGF4;NFKB2
Netrin UNC5B Signaling WP4747	5/52	0.076723	0.628173	2.32725	5.97534	PRKCA;FYN;TNF;TP53;RHOA
miRNA Role In Immune Response In Sepsis WP4329	4/37	0.0773691	0.628173	2.65056	6.78323	IRAK1;TLR7;TNF;NFKB2
Interferon Mediated Signaling WP4558	4/37	0.0773691	0.628173	2.65056	6.78323	IFNA4;IFNA17;PRKCA;IFNA10
FGF23 Signaling In Hypophosphatemic Rickets Related Disorders WP4790	3/23	0.0775713	0.628173	3.27855	8.3818	SLC34A1;ORAI1;NFKB2
Ebstein Barr Virus LMP1 Signaling WP262	3/23	0.0775713	0.628173	3.27855	8.3818	IRAK1;TNF;NFKB2
LDL Influence On CD14 And TLR4 WP5272	3/23	0.0775713	0.628173	3.27855	8.3818	MAPK11;NFKB2;CREB5
NRF2 ARE Regulation WP4357	3/23	0.0775713	0.628173	3.27855	8.3818	PRKCA;FYN;RBX1
SMC1 SMC3 Role In DNA Damage Cornelia De Lange Syndrome WP5118	2/11	0.0812619	0.628173	4.85435	12.1848	MDC1;MRE11
PAFAH1B1 Copy Number Variation WP5409	2/11	0.0812619	0.628173	4.85435	12.1848	DYNC1H1;PAFAH1B3
Glycolysis In Senescence WP5049	2/11	0.0812619	0.628173	4.85435	12.1848	PRKAA1;TP53
Cell Cycle WP179	9/120	0.0812821	0.628173	1.77594	4.4573	ORC4;CCNB2;PCNA;YWHAB;E2F2;ANAPC5;TP53;RBX1;CDC25B
Urotensin II Mediated Signaling WP5158	6/69	0.0816135	0.628173	2.08409	5.22222	ACTA2;PCNA;DDIT3;HSPA2;TNF;RHOA
Amyotrophic Lateral Sclerosis ALS WP2447	4/38	0.083617	0.628173	2.57247	6.3836	NEFM;TNF;TP53;PRPH
Parkinson 39 S Disease Pathway WP2371	4/38	0.083617	0.628173	2.57247	6.3836	MAPK11;EPRS1;CASP2;SNCA
Sleep Regulation WP3591	4/38	0.083617	0.628173	2.57247	6.3836	CACNA1I;ADORA1;NPAS2;HCRTR2
7Q11 23 Copy Number Variation Syndrome WP4932	8/104	0.0864342	0.637057	1.82461	4.46732	SNAP25;PCNA;HDAC3;MYO1C;NUP62;HSPA2;ATP5F1D;BRD4
Retinoblastoma Gene In Cancer WP2446	7/87	0.0872039	0.637057	1.91524	4.67225	CCNB2;PCNA;STMN1;E2F2;RPA2;TP53;CDC25B
Fragile X Syndrome WP4549	9/122	0.0879795	0.637057	1.74432	4.23984	CYFIP2;MKNK1;TBC1D7;ITPR1;PRKCA;FYN;AP2B1;SLC6A1;TARBP2
Parkin Ubiquitin Proteasomal System Pathway WP2359	6/71	0.0907943	0.649611	2.01975	4.8457	HSPA8;TUBA1B;HSPA5;TUBB;HSPA2;SNCA
Pathogenic Escherichia Coli Infection WP2272	5/55	0.0925246	0.654203	2.18727	5.20632	TUBA1B;TUBB;PRKCA;FYN;RHOA
Enterohepatic Circulation Of Bile Acids WP5396	2/12	0.0947673	0.654657	4.36869	10.2941	ABCC2;FABP6
PtdIns 4 5 P2 In Cytokinesis Pathway WP5199	2/12	0.0947673	0.654657	4.36869	10.2941	AFAP1;RHOA
Catabolism Of Skeletal Muscle In Cachexia WP5474	4/40	0.0968238	0.661262	2.4293	5.67208	MAPK11;TNF;ACVR2A;NFKB2
IL18 Signaling WP4754	5/56	0.0981355	0.66269	2.14427	4.97772	PRKAA1;IRAK1;PRKCA;TNF;TP53
MECP2 And Associated Rett Syndrome WP3584	6/73	0.10051	0.667573	1.95925	4.50137	CSRP1;GRIA3;FGF4;GRIA4;TAF1;EZH2
Common Pathways Underlying Drug Addiction WP2636	4/41	0.103771	0.667573	2.36352	5.35471	PRKCA;ADCY1;GRIA3;GRIA4
Amino Acid Metabolism WP3925	7/91	0.104485	0.667573	1.82366	4.11911	PNMT;CS;EPRS1;P4HA2;MARS2;PYCR1;ACSS1
Affected Pathways In Duchenne Muscular Dystrophy WP5356	6/74	0.105566	0.667573	1.93034	4.34021	CACNB2;PRKAA1;ITPR1;ORAI1;ITPR3;TNF
Cytosolic DNA Sensing Pathway WP4655	6/74	0.105566	0.667573	1.93034	4.34021	PYCARD;IFNA4;CXCL10;IFNA17;TRIM25;IFNA10
Cell Type Dependent Selectivity Of CCK2R Signaling WP3679	2/13	0.108855	0.667573	3.97132	8.80734	ITPR1;RYR3
Transcriptional Cascade Regulating Adipogenesis WP4211	2/13	0.108855	0.667573	3.97132	8.80734	DDIT3;GATA3
Disorders Of Galactose Metabolism WP5173	2/13	0.108855	0.667573	3.97132	8.80734	GYG1;GALK1
Purine Metabolism WP4792	2/13	0.108855	0.667573	3.97132	8.80734	DGUOK;APRT
DNA Replication WP466	4/42	0.110939	0.669652	2.3012	5.05983	ORC4;POLA2;PCNA;RPA2
7 Oxo C And 7 Beta HC Pathways WP5064	3/27	0.112912	0.669652	2.73155	5.95792	HSD11B2;AMACR;DHCR7
Gastric Cancer Network 1 WP2361	3/27	0.112912	0.669652	2.73155	5.95792	CENPF;ACTL6A;KIF20B
Fibrin Complement Receptor 3 Signaling WP4136	4/43	0.11832	0.669652	2.24208	4.7854	CXCL10;IRAK1;TNF;RHOA
10Q11 21Q11 23 Copy Number Variation Syndrome WP5352	5/60	0.122221	0.669652	1.98791	4.17842	SMARCC2;PCNA;MYO1C;UVSSA;SIRT6
Interactions Immune Cells And miRNAs In Tumor Microenvironment WP4559	3/28	0.122556	0.669652	2.62215	5.50438	CXCL10;TLR7;NFKB2
T Cell Receptor And Co Stimulatory Signaling WP2583	3/28	0.122556	0.669652	2.62215	5.50438	RASA1;FYN;PRKCA
Dravet Syndrome WP5200	3/28	0.122556	0.669652	2.62215	5.50438	MAPK11;PRKCA;TNF
IL19 Signaling WP5422	3/28	0.122556	0.669652	2.62215	5.50438	ACTA2;TNF;SOCS5
Sulfatase And Aromatase Pathway WP5368	2/14	0.12345	0.669652	3.64019	7.615	HSD17B2;CYP19A1
Osteoblast Signaling WP322	2/14	0.12345	0.669652	3.64019	7.615	PDGFRB;ITGAV
Renin Angiotensin Aldosterone System RAAS WP4756	4/44	0.125908	0.669652	2.18591	4.52965	CAMK1D;ITPR1;ITPR3;CREB5
Nucleotide Excision Repair WP4753	4/44	0.125908	0.669652	2.18591	4.52965	PCNA;ERCC2;RPA2;RBX1
Integrated Cancer Pathway WP1971	4/44	0.125908	0.669652	2.18591	4.52965	BLM;MRE11;TP53;CDC25B
Notch Signaling WP268	4/44	0.125908	0.669652	2.18591	4.52965	PTCRA;KAT2A;JAG1;DTX3
Hepatitis B Infection WP4666	10/151	0.127628	0.672846	1.55276	3.19656	IFNA4;MAPK11;PCNA;IRAK1;YWHAB;IFNA17;PRKCA;TNF;IFNA10;CREB5
PDGFR Beta Pathway WP3972	3/29	0.132488	0.679014	2.52117	5.09594	PDGFRB;RASA1;PRKCA
Biosynth Of Tetrahydrobiopterin And Phenylalanine Catabolism WP4156	2/15	0.138478	0.679014	3.36	6.64286	PNMT;DNAJC12
GPCRs Class C Metabotropic Glutamate Pheromone WP501	2/15	0.138478	0.679014	3.36	6.64286	GRM2;GABBR1
COVID 19 Adverse Outcome Pathway WP4891	2/15	0.138478	0.679014	3.36	6.64286	CXCL10;TNF
Cholesterol Biosynthesis Pathway WP197	2/15	0.138478	0.679014	3.36	6.64286	MSMO1;DHCR7
Rubinstein Taybi Syndrome 1 WP5367	2/15	0.138478	0.679014	3.36	6.64286	PCNA;NPAS2
Chronic Hyperglycemia Impairment Of Neuron Function WP5283	4/46	0.141673	0.679014	2.0816	4.06793	SNAP25;PRKCH;PRKCA;TRPV1
Mechanoreg And Pathology Of YAP TAZ Hippo And Non Hippo Mechs WP4534	4/47	0.149834	0.679014	2.03309	3.85925	MAP4K1;ACTA2;ACTA1;BUB1B-PAK6
ATM Signaling In Development And Disease WP3878	4/47	0.149834	0.679014	2.03309	3.85925	MDC1;MAPK11;MRE11;TP53
Selenium Metabolism And Selenoproteins WP28	4/47	0.149834	0.679014	2.03309	3.85925	SECISBP2;TRNAU1AP;SCLY;SEPHS1
Toll Like Receptor Signaling Related To MyD88 WP3858	3/31	0.153139	0.679014	2.34084	4.39237	IRAK1;TLR7;NFKB2
Eicosanoid Metabolism Via Cyclooxygenases COX WP4719	3/31	0.153139	0.679014	2.34084	4.39237	PTGFR;TBXA2R;PLA2G4B
Tumor Suppressor Activity Of SMARCB1 WP4204	3/31	0.153139	0.679014	2.34084	4.39237	SMARCC2;ACTL6A;EZH2
SARS Coronavirus And Innate Immunity WP4912	3/31	0.153139	0.679014	2.34084	4.39237	IFNA4;IFNA17;IFNA10
GABA Receptor Signaling WP4159	3/31	0.153139	0.679014	2.34084	4.39237	GABBR1;AP2B1;SLC6A1
TCA Cycle And Deficiency Of Pyruvate Dehydrogenase Complex PDHc WP2453	2/16	0.153875	0.679014	3.11984	5.83913	CS;SUCLG2
Classcl Pathway Steroidogenesis W Glucocort Mineralocort Metab WP4523	2/16	0.153875	0.679014	3.11984	5.83913	HSD11B2;CYP19A1
SREBF And miR33 In Cholesterol And Lipid Homeostasis WP2011	2/16	0.153875	0.679014	3.11984	5.83913	PRKAA1;SIRT6
Airway Smooth Muscle Cell Contraction WP4962	2/16	0.153875	0.679014	3.11984	5.83913	ITPR3;RHOA
8Q11 23 RB1CC1 Copy Number Variation WP5412	2/16	0.153875	0.679014	3.11984	5.83913	TNF;TP53
Sulfation Biotransformation Reaction WP692	2/16	0.153875	0.679014	3.11984	5.83913	SULT1A1;SULT1A2
Mitochondrial Complex III Assembly WP4921	2/16	0.153875	0.679014	3.11984	5.83913	UQCC2;UQCR11
DNA Repair Pathways Full Network WP4946	8/120	0.156981	0.679014	1.56263	2.89342	MRE11;WDR48;PCNA;CENPX;APEX1;ERCC2;RPA2;RBX1
Energy Metabolism WP1541	4/48	0.158171	0.679014	1.98677	3.66377	PRKAA1;NRF1;TFB1M;PRKAB1
1P36 Copy Number Variation Syndrome WP5345	7/102	0.160551	0.679014	1.61157	2.94779	HSPA8;TNFRSF18;GNB1;TRIM25;B3GALT6;RBX1;DKK3
Prader Willi And Angelman Syndrome WP3998	7/102	0.160551	0.679014	1.61157	2.94779	PCSK1;NUP205;NUP133;FEZ1;TPR;NUP62;TP53
Endoderm Differentiation WP2853	9/140	0.162163	0.679014	1.50322	2.73458	EOMES;ZNF462;TCF7L1;SFMBT1;RFX7;SP4;NABP2;DIP2A;EZH2
Development And Heterogeneity Of The ILC Family WP3893	3/32	0.163822	0.679014	2.26	4.08829	EOMES;GATA3;TNF
2Q11 2 Copy Number Variation Syndrome WP5221	3/32	0.163822	0.679014	2.26	4.08829	MMS19;RHOA;CIAO1
Metabolic Pathways Of Fibroblasts WP5312	3/32	0.163822	0.679014	2.26	4.08829	P4HA2;PYCR1;RHOA
13Q12 12 Copy Number Variation WP5406	3/32	0.163822	0.679014	2.26	4.08829	MIPEP;LINGO1;RHOA
Insulin Signaling WP481	10/160	0.165716	0.68216	1.4589	2.62234	MAP4K1;SNAP25;MAPK11;PRKAA1;PRKCH;MYO1C;KIF3A;RPS6KA2;PRKCA;GYG1
Platelet Mediated Interactions W Vascular And Circulating Cells WP4462	2/17	0.16958	0.685101	2.9117	5.16661	CD40;TLR7
MAP3K1 Role In Promoting And Blocking Gonadal Determination WP4872	2/17	0.16958	0.685101	2.9117	5.16661	MAPK11;RHOA
Resistin As A Regulator Of Inflammation WP4481	3/33	0.174718	0.685101	2.18455	3.81113	PLCB4;ITPR1;TNF
Prostaglandin Signaling WP5088	3/33	0.174718	0.685101	2.18455	3.81113	PYCARD;CXCL10;TNF
Photodynamic Therapy Induced AP 1 Survival Signaling WP3611	4/50	0.175335	0.685101	1.90019	3.30834	MAPK11;FGF7;TNF;TP53
Oxysterols Derived From Cholesterol WP4545	4/51	0.184146	0.685101	1.85967	3.1466	HSD11B2;AMACR;DHCR7;CYP8B1
miRNA Regulation Of DNA Damage Response WP1530	5/69	0.184991	0.685101	1.70755	2.8814	CCNB2;MRE11;TLK1;RPA2;TP53
DNA Damage Response WP707	5/69	0.184991	0.685101	1.70755	2.8814	CCNB2;MRE11;TLK1;RPA2;TP53
MFAP5 Effect On Permeability And Motility Of Endothelial Cells WP4560	2/18	0.185535	0.685101	2.72957	4.598	ITPR1;ITGAV
Genes Associated With The Development Of Rheumatoid Arthritis WP5033	2/18	0.185535	0.685101	2.72957	4.598	CD40;ITGAV
Interactions Between LOXL4 And Oxidative Stress Pathway WP3670	2/18	0.185535	0.685101	2.72957	4.598	FGF7;NRF1
Congenital Generalized Lipodystrophy WP5101	2/18	0.185535	0.685101	2.72957	4.598	BSCL2;FYN
MYD88 Distinct Input Output Pathway WP3877	2/18	0.185535	0.685101	2.72957	4.598	IRAK1;TLR7
Cholesterol Synthesis Disorders WP5193	2/18	0.185535	0.685101	2.72957	4.598	MSMO1;DHCR7
Ulcerative Colitis Signaling WP5174	2/18	0.185535	0.685101	2.72957	4.598	GATA3;TNF
Fatty Acid Transporters WP5061	2/18	0.185535	0.685101	2.72957	4.598	FABP6;ACSL5
Hepatocyte Growth Factor Receptor Signaling WP313	3/34	0.185809	0.685101	2.11397	3.55789	MAP4K1;HGF;RASA1
T Cell Activation SARS CoV 2 WP5098	6/88	0.188898	0.692241	1.59959	2.6658	ITPR1;FYN;CCL19;CD3D;TNF;TP53
Macrophage Stimulating Protein MSP Signaling WP5353	7/108	0.195842	0.704739	1.51535	2.4707	PDGFRB;ACTA2;CXCL10;PCNA;KLK15;TNF;TP53
Wnt B Catenin Signaling Inhibitors Current Past Clinical Trials WP5442	1/5	0.200865	0.704739	5.45634	8.7581	PORCN
GLP 1 Secretion From Intestine To Portal Vein WP5446	1/5	0.200865	0.704739	5.45634	8.7581	PCSK1
Proline And Hydroxyproline Pathways WP5026	1/5	0.200865	0.704739	5.45634	8.7581	PYCR1
LTF Danger Signal Response Pathway WP4478	2/19	0.201689	0.704739	2.56887	4.11284	IRAK1;TNF
Overview Of Nanoparticle Effects WP3287	2/19	0.201689	0.704739	2.56887	4.11284	CDH3;TNF
Mitochondrial Gene Expression WP391	2/19	0.201689	0.704739	2.56887	4.11284	NRF1;TFB1M
KCNQ2 Related Epilepsies WP5360	2/19	0.201689	0.704739	2.56887	4.11284	ITPR1;PRKCA
Host Pathogen Interaction Of Human Coronaviruses MAPK Signaling WP4877	3/36	0.208507	0.719099	1.98565	3.11307	MAPK11;RPS6KA2;DDIT3
Target Of Rapamycin Signaling WP1471	3/36	0.208507	0.719099	1.98565	3.11307	PRKAA1;PRKCA;PRKAB1
P53 Transcriptional Gene Network WP4963	6/91	0.209388	0.719099	1.54289	2.41241	PRKAA1;PCNA;DRAM1;SCO2;TNF;PRKAB1
15Q13 3 Copy Number Variation Syndrome WP4942	2/20	0.217994	0.736036	2.42603	3.69555	KLF13;FYN
Lipid Metabolism In Senescent Cells WP5149	2/20	0.217994	0.736036	2.42603	3.69555	PLA2G4C;TP53
Hypertrophy Model WP516	2/20	0.217994	0.736036	2.42603	3.69555	WDR1;IFRD1
Melatonin Metabolism And Effects WP3298	3/37	0.220078	0.73892	1.92714	2.91726	SULT1A1;IRAK1;PRKCA
Cell Lineage Map For Neuronal Differentiation WP5417	8/132	0.223198	0.745232	1.41052	2.11535	SNAP25;GABBR1;HOMER3;NEFM;SLC6A1;NES;FUT4;FGF4
Cancer Pathways WP5434	26/507	0.231597	0.746237	1.18411	1.73206	IFNA4;ADCY3;ADCY1;ADCY6;RASSF1;HEY2;TPR;E2F2;ITGAV;PDGFRB;TCF7L1;JAG1;FZD2;IFNA17;HGF;PRKCA;RHOA;RBX1;NFKB2;HEYL;PLCB4;GNB1;COL4A6;COL4A5;TP53;IFNA10
Nucleotide Excision Repair In Xeroderma Pigmentosum WP5114	5/75	0.232133	0.746237	1.5607	2.27932	PCNA;UVSSA;ERCC2;RPA2;RBX1
T Cell Receptor Signaling WP69	5/75	0.232133	0.746237	1.5607	2.27932	MAP4K1;RIPK2;ITPR1;FYN;CD3D
Host Pathogen Interaction Of Human CoVs Apoptosis WP4864	2/21	0.234405	0.746237	2.29823	3.33404	MAPK11;TNF
Mir 124 Predicted Interactions W Cll Cycle And Differentiation WP3595	1/6	0.235915	0.746237	4.36484	6.30406	PRKAA1
GLP 1 From Intestine And Pancreas Role In Glucose Homeostasis WP5452	1/6	0.235915	0.746237	4.36484	6.30406	PCSK1
lncRNA Mediated Mechanisms Of Therapeutic Resistance WP3672	1/6	0.235915	0.746237	4.36484	6.30406	TP53
Fluoroacetic Acid Toxicity WP4966	1/6	0.235915	0.746237	4.36484	6.30406	CS
Metastatic Brain Tumor WP2249	1/6	0.235915	0.746237	4.36484	6.30406	TP53
miRNA Biogenesis WP2338	1/6	0.235915	0.746237	4.36484	6.30406	TARBP2
Proximal Tubule Transport WP4917	4/57	0.239669	0.754141	1.64862	2.35505	ABCC2;SLC34A1;SLC22A2;FXYD2
Kisspeptin Kisspeptin Receptor System In The Ovary WP4871	3/39	0.24358	0.754949	1.81989	2.57025	PRKCH;PLCB4;PRKCA
Smith Magenis And Potocki Lupski Syndrome Copy Number Variation WP5381	9/156	0.246403	0.754949	1.33847	1.87492	BLM;PRKAA1;COPS7A;TNF;PRKAB1;TP53;RAB8A;RHOA;ETV5
2Q37 Copy Number Variation Syndrome WP5224	8/136	0.247273	0.754949	1.36615	1.90888	CALCA;CAPN10;ILK;SCLY;DISC1;TNF;TP53;ARF5
Thyroid Stimulating Hormone TSH Signaling WP2032	4/58	0.249284	0.754949	1.61801	2.24767	PDE4D;APEX1;GNB1;ADCY3
Pre Implantation Embryo WP3527	4/58	0.249284	0.754949	1.61801	2.24767	TCF7L1;DPRX;DDIT3;GATA3
NAD Metab In Oncogene Induced And Mt Dysfunction Senescence WP5046	2/22	0.250883	0.754949	2.1832	3.01886	PRKAA1;TP53
Neural Crest Cell Migration During Development WP4564	3/40	0.255479	0.754949	1.77061	2.4162	RHOA;EPHB3;BUB1B-PAK6
PDGF Pathway WP2526	3/40	0.255479	0.754949	1.77061	2.4162	PDGFRB;RASA1;RHOA
Focal Adhesion WP306	11/199	0.257985	0.754949	1.27933	1.73331	PDGFRB;HGF;COL4A6;ILK;PRKCA;FLNB;ITGAV;FYN;MYL9;RHOA;BUB1B-PAK6
Spinal Cord Injury WP2431	7/119	0.267257	0.754949	1.36573	1.80214	CXCL10;APEX1;PRKCA;CD47;TNF;TP53;RHOA
Photodynamic Therapy Induced NFE2L2 NRF2 Survival Signaling WP3612	2/23	0.267388	0.754949	2.07913	2.74248	MAPK11;ABCC2
Post COVID Neuroinflammation WP5485	2/23	0.267388	0.754949	2.07913	2.74248	TLR7;TNF
DNA Mismatch Repair WP531	2/23	0.267388	0.754949	2.07913	2.74248	PCNA;RPA2
Nucleotide Binding Oligomerization Domain NOD Pathway WP1433	3/41	0.267456	0.754949	1.72393	2.27351	PYCARD;ACAP1;RIPK2
Circadian Rhythm Genes WP3594	11/201	0.26831	0.754949	1.26573	1.66521	PRKAA1;HDAC3;KMT2A;FBXW11;ADORA1;ID3;ADCY1;TP53;NPAS2;HCRTR2;EZH2
Novel Intracellular Components Of RIG I Like Receptor Pathway WP3865	4/60	0.268749	0.754949	1.56006	2.04988	MAPK11;CXCL10;TRIM25;TNF
DDX1 As A Regulatory Component Of The Drosha Microprocessor WP2942	1/7	0.26943	0.754949	3.63718	4.76996	MRE11
Cholesterol Biosynthesis With Skeletal Dysplasias WP4804	1/7	0.26943	0.754949	3.63718	4.76996	DHCR7
Activation Of NLRP3 Inflammasome By SARS CoV 2 WP4876	1/7	0.26943	0.754949	3.63718	4.76996	PYCARD
Hypothetical Craniofacial Development Pathway WP3655	1/7	0.26943	0.754949	3.63718	4.76996	RHOA
Nanomaterial Induced Inflammasome Activation WP3890	1/7	0.26943	0.754949	3.63718	4.76996	PYCARD
Hfe Effect On Hepcidin Production WP3924	1/7	0.26943	0.754949	3.63718	4.76996	TMPRSS6
Hippo Merlin Signaling Dysregulation WP4541	7/120	0.274089	0.754949	1.35358	1.75194	PDGFRB;CXCL10;CDH3;PLCB4;ITGAV;RBX1;BUB1B-PAK6
17Q12 Copy Number Variation Syndrome WP5287	6/100	0.274897	0.754949	1.39451	1.80081	PNMT;RDM1;TBC1D3B;PCGF2;AP2B1;SOCS7
Splicing Factor NOVA Regulated Synaptic Proteins WP4148	3/42	0.279496	0.754949	1.67963	2.14114	NTNG1;PLCB4;NCDN
Metabolic Reprogramming In Pancreatic Cancer WP5220	3/42	0.279496	0.754949	1.67963	2.14114	CS;RPE;TP53
Eukaryotic Transcription Initiation WP405	3/42	0.279496	0.754949	1.67963	2.14114	TBP;ERCC2;ILK
Integrin Mediated Cell Adhesion WP185	6/101	0.282471	0.754949	1.37976	1.74426	CAPN10;RHO;ILK;ITGAV;FYN;BUB1B-PAK6
Wnt Signaling And Pluripotency WP399	6/101	0.282471	0.754949	1.37976	1.74426	TCF7L1;PRKCH;FZD2;PRKCA;TP53;RHOA
Physiological And Pathological Hypertrophy Of The Heart WP1528	2/24	0.283889	0.754949	1.98452	2.49885	MAPK11;RHOA
miRNA Regulation Of P53 Pathway In Prostate Cancer WP3982	2/24	0.283889	0.754949	1.98452	2.49885	EI24;TP53
Kynurenine Pathway And Links To Cell Senescence WP5044	2/24	0.283889	0.754949	1.98452	2.49885	TNF;TP53
Hippocampal Synaptogenesis And Neurogenesis WP5231	2/24	0.283889	0.754949	1.98452	2.49885	NRXN1;PRKCA
Estrogen Metabolism WP5276	2/24	0.283889	0.754949	1.98452	2.49885	HSD17B2;CYP19A1
Fas Ligand Pathway And Stress Induction Of Heat Shock Proteins WP314	3/43	0.291584	0.754949	1.63756	2.01817	ACTA1;RIPK2;TNF
Neural Crest Cell Migration In Cancer WP4565	3/43	0.291584	0.754949	1.63756	2.01817	RHOA;EPHB3;BUB1B-PAK6
Hedgehog Signaling WP4249	3/43	0.291584	0.754949	1.63756	2.01817	KIF3A;GPR161;BOC
Lung Fibrosis WP3624	4/63	0.298406	0.754949	1.4805	1.79037	FGF7;CALCA;HGF;TNF
4 Hydroxytamoxifen DEX And Retinoic Acids Regulation Of P27 WP3879	2/25	0.300352	0.754949	1.89814	2.28308	PRKAA1;MKNK1
Relationship Between Inflammation COX 2 And EGFR WP4483	2/25	0.300352	0.754949	1.89814	2.28308	CYP19A1;PLA1A
Glycosylation And Related Congenital Defects WP4521	2/25	0.300352	0.754949	1.89814	2.28308	GMPPB;ALG8
Mammalian Disorder Of Sexual Development WP4842	2/25	0.300352	0.754949	1.89814	2.28308	MAPK11;WT1
Thyroxine Thyroid Hormone Production WP1981	2/25	0.300352	0.754949	1.89814	2.28308	PRKAA1;PRKCA
NIPBL Role In DNA Damage Cornelia De Lange Syndrome WP5119	1/8	0.301477	0.754949	3.11742	3.73797	MDC1
Dual Hijack Model Of Vif In HIV Infection WP3300	1/8	0.301477	0.754949	3.11742	3.73797	RBX1
ROS In COVID 19 Endothelial Dysfunction WP5258	1/8	0.301477	0.754949	3.11742	3.73797	TNF
Hijack Of Ubiquitination By SARS CoV 2 WP4860	1/8	0.301477	0.754949	3.11742	3.73797	RBX1
Caloric Restriction And Aging WP4191	1/8	0.301477	0.754949	3.11742	3.73797	TP53
Effects Of Nitric Oxide WP1995	1/8	0.301477	0.754949	3.11742	3.73797	MB
Genes Controlling Nephrogenesis WP4823	3/44	0.303707	0.757377	1.59753	1.90377	PDGFRB;WT1;ILK
Polycystic Kidney Disease Pathway WP2571	5/84	0.308008	0.764929	1.38224	1.62777	PRKAA1;FZD2;TNF;PRKAB1;ADCY6
PI3K Akt Signaling WP4172	17/338	0.315262	0.770716	1.15784	1.33656	PDGFRB;IFNA4;PRKAA1;IFNA17;HGF;PRKCA;FGF4;FGF7;GNB1;FGF18;COL4A6;COL4A5;ITGAV;TP53;FGF12;IFNA10;CREB5
Prostaglandin Synthesis And Regulation WP98	3/45	0.31585	0.770716	1.55941	1.7972	PTGFR;HSD11B2;TBXA2R
Nephrotic Syndrome WP4758	3/45	0.31585	0.770716	1.55941	1.7972	WT1;MYH9;COL4A5
SARS CoV 2 Mt Chronic Ox Stress And Endothelial Dysfunction WP5183	2/26	0.31675	0.770716	1.81895	2.09114	SIRT6;TNF
PPAR Alpha Pathway WP2878	2/26	0.31675	0.770716	1.81895	2.09114	KLK15;CYP8B1
Endoplasmic Reticulum Stress Response In Coronavirus Infection WP4861	3/46	0.328002	0.772539	1.52307	1.69782	PPP1R14B;HSPA5;DDIT3
SARS CoV 2 Innate Immunity Evasion And Cell Immune Response WP5039	4/66	0.328424	0.772539	1.40864	1.56845	CXCL10;TRIM25;TLR7;TNF
Physico Chemical Features And Toxicity Associated Pathways WP3680	4/66	0.328424	0.772539	1.40864	1.56845	ACTA1;FZD2;NEFM;RHOA
Histone Modifications WP2369	4/66	0.328424	0.772539	1.40864	1.56845	KMT2E;SETBP1;KMT2A;EZH2
Folate Alcohol And Cancer Pathway Hypotheses WP1589	1/9	0.33212	0.772539	2.7276	3.00652	MTHFR
Nod Like Receptor NLR Signaling WP288	1/9	0.33212	0.772539	2.7276	3.00652	CD40
Benzo A Pyrene Metabolism WP696	1/9	0.33212	0.772539	2.7276	3.00652	AKR1A1
Methylation Pathways WP704	1/9	0.33212	0.772539	2.7276	3.00652	PNMT
FGFR3 Signal Chondrocyte Proliferation Terminal Differentiation WP4767	2/27	0.333057	0.772539	1.7461	1.91974	MAPK11;FGF18
Photodynamic Therapy Induced Unfolded Protein Response WP3613	2/27	0.333057	0.772539	1.7461	1.91974	HSPA5;DDIT3
1Q21 1 Copy Number Variation Syndrome WP4905	2/27	0.333057	0.772539	1.7461	1.91974	PRKAA1;PRKAB1
Regulation Of Actin Cytoskeleton WP51	8/150	0.336907	0.772539	1.23055	1.33878	CYFIP2;PDGFRB;FGF7;FGF18;FGF12;RHOA;FGF4;BUB1B-PAK6
Overview Of Proinflammatory And Profibrotic Mediators WP5095	7/129	0.337261	0.772539	1.25313	1.36202	CXCL10;IFNA4;CCL21;IFNA17;CCL19;TNF;IFNA10
RAC1 PAK1 P38 MMP2 Pathway WP3303	4/68	0.348535	0.772539	1.36448	1.43818	MAPK11;RASA1;STMN1;TP53
PPAR Signaling WP3942	4/68	0.348535	0.772539	1.36448	1.43818	FABP6;ILK;ACSL5;CYP8B1
TLR4 Signaling And Tolerance WP3851	2/28	0.34925	0.772539	1.67886	1.7661	IRAK1;TNF
Exercise Induced Circadian Regulation WP410	3/48	0.352282	0.772539	1.45523	1.51827	HSPA8;PSMA4;AZIN1
IL26 Signaling WP5347	3/48	0.352282	0.772539	1.45523	1.51827	ACTA2;DDIT3;TNF
Folate Metabolism WP176	4/69	0.358599	0.772539	1.34341	1.37774	MTHFR;TNF;TP53;NFKB2
Allograft Rejection WP2328	5/90	0.360397	0.772539	1.28427	1.31066	CD40;TUBA1B;CCL21;CCL19;TNF
mRNA Vaccine Activation Of Dendritic Cell And Induction IFN1 WP5187	1/10	0.361419	0.772539	2.4244	2.46736	TLR7
Mammary Gland Development Pathway Involution Stage 4 Of 4 WP2815	1/10	0.361419	0.772539	2.4244	2.46736	TP53
Arsenic Metabolism And Reactive Oxygen Species Generation WP5233	1/10	0.361419	0.772539	2.4244	2.46736	COA3
Interleukin 1 Induced Activation Of NF kB WP3656	1/10	0.361419	0.772539	2.4244	2.46736	IRAK1
SARS CoV 2 And COVID 19 Pathway WP4846	1/10	0.361419	0.772539	2.4244	2.46736	TLR7
Neurotransmitter Disorders WP4220	1/10	0.361419	0.772539	2.4244	2.46736	PNMT
TCA Cycle In Senescence WP5050	1/10	0.361419	0.772539	2.4244	2.46736	TP53
Vitamin D Metabolism WP1531	1/10	0.361419	0.772539	2.4244	2.46736	DHCR7
Steroid Biosynthesis WP496	1/10	0.361419	0.772539	2.4244	2.46736	HSD17B2
Interleukin 1 IL 1 Structural Pathway WP2637	3/49	0.364387	0.772539	1.42352	1.43709	MAPK11;IRAK1;MKNK1
Phosphoinositides Metabolism WP4971	3/49	0.364387	0.772539	1.42352	1.43709	PLCB4;MTMR11;MTMR4
RAS And Bradykinin Pathways In COVID 19 WP4969	2/29	0.365306	0.772539	1.61659	1.62794	TNF;RHOA
Cannabinoid Receptor Signaling WP3869	2/29	0.365306	0.772539	1.61659	1.62794	MAPK11;ADCY1
Lipid Metabolism Pathway WP3965	2/29	0.365306	0.772539	1.61659	1.62794	PRKAA1;PRKAB1
One Carbon Metabolism WP241	2/29	0.365306	0.772539	1.61659	1.62794	MTHFD1L;MTHFR
Kleefstra Syndrome WP5351	2/29	0.365306	0.772539	1.61659	1.62794	SMARCC2;ACTL6A
Wnt Signaling WP428	6/113	0.375897	0.772539	1.22425	1.19785	PORCN;TCF7L1;FZD2;PLCB4;PRKCA;RHOA
Leptin Signaling WP2034	4/71	0.378711	0.772539	1.30317	1.26536	PRKAA1;FYN;SOCS7;RHOA
GPR143 In Melanocytes And Retinal Pigment Epithelium Cells WP4941	2/30	0.381208	0.772539	1.55878	1.5033	PLCB4;ITPR1
Oligodendrocyte Differentiation Leading To Myelin For CNS WP4304	2/30	0.381208	0.772539	1.55878	1.5033	TNF;NKX2-2
Matrix Metalloproteinases WP129	2/30	0.381208	0.772539	1.55878	1.5033	TCF20;TNF
GDNF RET Signaling Axis WP4830	2/30	0.381208	0.772539	1.55878	1.5033	WT1;GATA3
Autophagy WP4923	2/30	0.381208	0.772539	1.55878	1.5033	PRKAA1;PRKAB1
Sudden Infant Death Syndrome SIDS Susceptibility Pathways WP706	8/157	0.383561	0.772539	1.17231	1.12337	SNAP25;YWHAB;MBD1;HTR3A;GATA3;TNF;NKX2-2;NFKB2
Synaptic Vesicle Pathway WP2267	3/51	0.388473	0.772539	1.36406	1.28976	SNAP25;AP2B1;SYN3
Non Small Cell Lung Cancer WP4255	4/72	0.388746	0.772539	1.28394	1.21311	RASSF1;E2F2;PRKCA;TP53
Induction Of Autophagy And TLR Signaling By Graphene Oxide WP5336	1/11	0.389435	0.772539	2.18185	2.05761	TNF
Neolacto Series Sphingolipid Metabolism WP5302	1/11	0.389435	0.772539	2.18185	2.05761	B4GALT4
Inclusion Body Myositis WP5120	1/11	0.389435	0.772539	2.18185	2.05761	NFKB2
NPHP1 Deletion Syndrome WP5399	1/11	0.389435	0.772539	2.18185	2.05761	FLNB
IDO Metabolic Pathway WP5414	1/11	0.389435	0.772539	2.18185	2.05761	TNF
Nucleotide GPCRs WP80	1/11	0.389435	0.772539	2.18185	2.05761	ADORA1
ATR Signaling WP3875	1/11	0.389435	0.772539	2.18185	2.05761	RPA2
Antiviral And Anti-Inflam Effects Of Nrf2 On SARS CoV 2 Pathway WP5113	2/31	0.396936	0.772539	1.50495	1.39054	GUCY1A1;TNF
Prostaglandin And Leukotriene Metabolism In Senescence WP5122	2/31	0.396936	0.772539	1.50495	1.39054	MAPK11;ADCY3
miRNA Regulation Of Prostate Cancer Signaling WP3981	2/31	0.396936	0.772539	1.50495	1.39054	PDGFRB;TP53
Constitutive Androstane Receptor Pathway WP2875	2/31	0.396936	0.772539	1.50495	1.39054	SULT1A1;ABCC2
Ethanol Effects On Histone Modifications WP3996	2/31	0.396936	0.772539	1.50495	1.39054	HDAC3;MTHFR
Gastric Cancer Network 2 WP2363	2/31	0.396936	0.772539	1.50495	1.39054	UBE2T;TP53
Base Excision Repair WP4752	2/31	0.396936	0.772539	1.50495	1.39054	PCNA;APEX1
EGF EGFR Signaling WP437	8/159	0.396972	0.772539	1.15666	1.06863	MAP4K1;PTPRR;PCNA;RPS6KA2;RASA1;STMN1;PRKCA;AP2B1
Epithelial To Mesenchymal Transition In Colorectal Cancer WP4239	8/160	0.40368	0.772539	1.14899	1.04229	CLDN10;MAPK11;JAG1;FZD2;COL4A6;COL4A5;TP53;EZH2
Small Cell Lung Cancer WP4658	5/95	0.404266	0.772539	1.2126	1.09823	COL4A6;COL4A5;E2F2;ITGAV;TP53
Embryonic Stem Cell Pluripotency Pathways WP3931	6/117	0.40745	0.772539	1.17988	1.05934	PDGFRB;FGF7;FZD2;FGF18;FGF12;FGF4
Metapathway Biotransformation Phase I And II WP702	9/183	0.410919	0.772539	1.12917	1.00424	SULT1A1;GLYATL1;AKR1A1;CYP19A1;CYP8B1;HS3ST4;HS6ST2;GAL3ST4;SULT1A2
Apoptosis Related Network Due To Altered Notch3 Ovarian Cancer WP2864	3/53	0.41233	0.772539	1.30936	1.16	HSPA5;RIPK2;TNF
Regucalcin In Proximal Tubule Epithelial Kidney Cells WP4838	2/32	0.412477	0.772539	1.4547	1.28825	ACTA2;CALCA
Endothelin Pathways WP2197	2/32	0.412477	0.772539	1.4547	1.28825	CALCA;PRKCA
Monoamine Transport WP727	2/32	0.412477	0.772539	1.4547	1.28825	SLC6A1;TNF
Nanoparticle Triggered Regulated Necrosis WP2513	1/12	0.416223	0.772539	1.9834	1.73851	TNF
Irinotecan Pathway WP229	1/12	0.416223	0.772539	1.9834	1.73851	ABCC2
Spina Bifida WP5150	1/12	0.416223	0.772539	1.9834	1.73851	MTHFR
Ciliopathies WP4803	9/184	0.417206	0.772539	1.12266	0.9814	IQCB1;CENPF;TCTN3;GPR161;ARL3;ZNF423;PIBF1;ADCY6;GLIS2
Vitamin B12 Metabolism WP1533	3/54	0.42415	0.772539	1.28362	1.10092	MTHFR;TNF;NFKB2
Nuclear Receptors In Lipid Metabolism And Toxicity WP299	2/33	0.427817	0.772539	1.40771	1.19523	ABCC2;CYP8B1
Type I Collagen Synthesis Osteogenesis Imperfecta WP4786	2/33	0.427817	0.772539	1.40771	1.19523	P4HA2;ITPR1
FBXL10 Enhancement Of MAP ERK Signaling In DLBCL WP4553	2/33	0.427817	0.772539	1.40771	1.19523	BCOR;EZH2
Disruption Of Postsynaptic Signaling By CNV WP4875	2/33	0.427817	0.772539	1.40771	1.19523	NRXN1;NRXN2
Mitochondrial Immune Response To SARS CoV 2 WP5038	2/33	0.427817	0.772539	1.40771	1.19523	TLR7;NFKB2
Cardiomyocyte Signaling Converging On Titin WP5344	2/33	0.427817	0.772539	1.40771	1.19523	NUP62;PRKCA
Signal Transduction Through IL1R WP4496	2/33	0.427817	0.772539	1.40771	1.19523	IRAK1;TNF
Alpha 6 Beta 4 Signaling WP244	2/33	0.427817	0.772539	1.40771	1.19523	PRKCA;RHOA
BDNF TrkB Signaling WP3676	2/33	0.427817	0.772539	1.40771	1.19523	MKNK1;ADCY1
Cardiac Hypertrophic Response WP2795	3/55	0.435887	0.772539	1.25887	1.04533	MAP4K1;PRKCA;TNF
Chemokine Signaling WP3929	8/165	0.43718	0.772539	1.11211	0.920169	CXCL10;PLCB4;CCL21;GNB1;ADCY3;ADCY1;CCL19;ADCY6
Genes Targeted By miRNAs In Adipocytes WP1992	1/13	0.441837	0.772539	1.81802	1.48498	HAND2
Homologous Recombination WP186	1/13	0.441837	0.772539	1.81802	1.48498	MRE11
Osteopontin Signaling WP1434	1/13	0.441837	0.772539	1.81802	1.48498	ITGAV
Krebs Cycle Disorders WP4236	1/13	0.441837	0.772539	1.81802	1.48498	SUCLG2
Prostaglandin And Leukotriene Metabolism In Senescence WP5321	2/34	0.442942	0.772539	1.36364	1.11044	MAPK11;ADCY3
Leukocyte Intrinsic Hippo Pathway Functions WP4542	2/34	0.442942	0.772539	1.36364	1.11044	TAFAZZIN;RHOA
11P11 2 Copy Number Variation Syndrome WP5348	3/56	0.447533	0.772539	1.23505	0.992986	NRXN1;TP53;B4GALT4
Regulatory Circuits Of STAT3 Signaling WP4538	4/78	0.448283	0.772539	1.17947	0.946324	PDGFRB;PTPRD;MAPK11;STMN1
Mesodermal Commitment Pathway WP2857	7/145	0.452492	0.772539	1.1069	0.877759	EOMES;ZNF462;TCF7L1;NABP2;DIP2A;GATA3;ACVR2A
Male Infertility WP4673	7/145	0.452492	0.772539	1.1069	0.877759	ERCC2;MTHFR;VCX;TNF;RGS9;ETV5;MLH3
Neural Crest Differentiation WP2064	5/101	0.456359	0.772539	1.13646	0.891523	TCF7L1;HDAC3;HEY2;PMP22;NFKB2
Photodynamic Therapy Induced NF kB Survival Signaling WP3617	2/35	0.457843	0.772539	1.32225	1.03298	TNF;NFKB2
Fatty Acids And Lipoproteins Transport In Hepatocytes WP5323	2/35	0.457843	0.772539	1.32225	1.03298	OSBPL5;ACSL5
Influence Of Laminopathies On Wnt Signaling WP4844	2/35	0.457843	0.772539	1.32225	1.03298	TCF7L1;TARBP2
P38 MAPK Signaling WP400	2/35	0.457843	0.772539	1.32225	1.03298	MKNK1;DDIT3
Neurogenesis Regulation In The Olfactory Epithelium WP5265	3/57	0.459081	0.772539	1.21212	0.943666	MRE11;JAG1;DISC1
Abnormal Ca Handling And Effects On Muscle Contraction In DMD WP5343	1/14	0.466328	0.772539	1.67808	1.28015	PLA2G4B
Regulation Sister Chromatid Sep At Meta-Anaphase Transition WP4240	1/14	0.466328	0.772539	1.67808	1.28015	BUB1B
Mod Of PI3K Akt mTOR Signaling By Bioactive Sphingolipids WP5192	1/14	0.466328	0.772539	1.67808	1.28015	S1PR3
H19 Rb E2F1 And CDK Beta Catenin In Colorectal Cancer WP3969	1/14	0.466328	0.772539	1.67808	1.28015	JAG1
Codeine And Morphine Metabolism WP1604	1/14	0.466328	0.772539	1.67808	1.28015	ABCC2
Mineralocorticoid Biosynthesis WP5279	1/14	0.466328	0.772539	1.67808	1.28015	HSD11B2
Glucocorticoid Biosynthesis WP5280	1/14	0.466328	0.772539	1.67808	1.28015	HSD11B2
Somatic Sex Determination WP4814	1/14	0.466328	0.772539	1.67808	1.28015	WT1
mRNA Processing WP411	6/125	0.46995	0.772539	1.1001	0.830715	RBM39;PRPF3;CLASRP;SUGP2;RBM5;CLK2
Primary Ovarian Insufficiency WP5316	8/170	0.470438	0.772539	1.0775	0.812531	RECQL4;CNTNAP2;PCSK1;BLM;HELQ;WT1;TNF;CYP19A1
TGF Beta Receptor Signaling In Skeletal Dysplasias WP4816	3/58	0.470525	0.772539	1.19001	0.89716	ADAMTSL2;ZNF423;TNF
15Q11Q13 Copy Number Variation WP5407	3/58	0.470525	0.772539	1.19001	0.89716	KLF13;GJC2;SLF2
Vitamin D Sensitive Calcium Signaling In Depression WP4698	2/36	0.47251	0.772539	1.28329	0.962082	ITPR1;ITPR3
Factors And Pathways Affecting IGF1 Akt Signaling WP3850	2/36	0.47251	0.772539	1.28329	0.962082	ILK;PRKAB1
Enterocyte Cholesterol Metabolism WP5333	2/36	0.47251	0.772539	1.28329	0.962082	MSMO1;DHCR7
Wnt Signaling In Kidney Disease WP4150	2/36	0.47251	0.772539	1.28329	0.962082	FZD2;RHOA
Alzheimer 39 S Disease And miRNA Effects WP2059	12/261	0.475174	0.772539	1.05155	0.782432	TUBA1B;FZD2;PLCB4;PSMA4;KIF5C;DDIT3;TUBB;ITPR1;ITPR3;TNF;RYR3;SNCA
Alzheimer 39 S Disease WP5124	12/261	0.475174	0.772539	1.05155	0.782432	TUBA1B;FZD2;PLCB4;PSMA4;KIF5C;DDIT3;TUBB;ITPR1;ITPR3;TNF;RYR3;SNCA
Genes Related To Primary Cilium Development Based On CRISPR WP4536	5/104	0.481944	0.772539	1.10184	0.804267	KIF3A;TCTN3;ARL3;PIBF1;CEP44
Effect Of Progerin On Genes Involved In Progeria WP4320	2/37	0.486934	0.772539	1.24656	0.897059	CHD4;TP53
Thymic Stromal Lymphopoietin TSLP Signaling WP2203	2/37	0.486934	0.772539	1.24656	0.897059	FYN;NFKB2
Serotonin HTR1 Group And FOS Pathway WP722	2/37	0.486934	0.772539	1.24656	0.897059	ITPR1;RHOA
Neovascularization Processes WP4331	2/37	0.486934	0.772539	1.24656	0.897059	JAG1;NFKB2
Glioblastoma Signaling WP2261	4/82	0.486953	0.772539	1.11875	0.805038	PDGFRB;PRKCH;PRKCA;TP53
Mammary Gland Development Pathway Embryonic Development Stg 1/4 WP2813	1/15	0.489746	0.772539	1.55814	1.11231	TNF
Transcriptional Activation By NRF2 In Response To Phytochemicals WP3	1/15	0.489746	0.772539	1.55814	1.11231	PRKCA
RIOK1 And RIOK2 In EGFR And PI3K Mediated Tumorigenesis WP3873	1/15	0.489746	0.772539	1.55814	1.11231	TP53
Pro Survival Signaling Of Neuroprotectin D1 WP5182	1/15	0.489746	0.772539	1.55814	1.11231	TNF
miRNAs Involved In DNA Damage Response WP1545	1/15	0.489746	0.772539	1.55814	1.11231	TP53
Omega 3 Omega 6 Fatty Acid Synthesis WP4723	1/15	0.489746	0.772539	1.55814	1.11231	PLA2G4B
Iron Sulfur Cluster Biogenesis WP5152	1/15	0.489746	0.772539	1.55814	1.11231	FXN
Biogenic Amine Synthesis WP550	1/15	0.489746	0.772539	1.55814	1.11231	PNMT
GPR40 Pathway WP3958	1/15	0.489746	0.772539	1.55814	1.11231	ITPR3
Development Of Ureteric Derived Collecting System WP5053	3/60	0.493074	0.775752	1.14814	0.811846	WT1;ILK;GATA3
mBDNF And proBDNF Regulation Of GABA Neurotransmission WP4829	2/38	0.50111	0.784289	1.21187	0.837319	AP2B1;RHOA
TNF Related Weak Inducer Of Apoptosis TWEAK Signaling WP2036	2/38	0.50111	0.784289	1.21187	0.837319	TNF;NFKB2
Modulators Of TCR Signaling And T Cell Activation WP5072	3/61	0.504168	0.787026	1.12828	0.772701	MAP4K1;FIBP;CD3D
Interactome Of Polycomb Repressive Complex 2 PRC2 WP2916	1/16	0.512137	0.789909	1.45419	0.973086	EZH2
2Q21 1 Copy Number Variation Syndrome WP5223	1/16	0.512137	0.789909	1.45419	0.973086	RHOA
NAD Metabolism WP3644	1/16	0.512137	0.789909	1.45419	0.973086	SIRT6
ID Signaling WP53	1/16	0.512137	0.789909	1.45419	0.973086	ID3
Ovarian Infertility WP34	2/39	0.515031	0.789909	1.17906	0.782339	TBP;CYP19A1
T Cell Antigen Receptor TCR Pathway During Staph A. Infection WP3863	3/62	0.515136	0.789909	1.1091	0.735696	FYN;CD3D;TNF
ncRNAs In Wnt Signaling In Hepatocellular Carcinoma WP4336	4/85	0.515216	0.789909	1.07714	0.714329	PORCN;TCF7L1;FZD2;EZH2
Selenium Micronutrient Network WP15	4/86	0.524476	0.795687	1.06395	0.686628	PRDX5;MTHFR;TNF;NFKB2
Endometrial Cancer WP4155	3/63	0.525972	0.795687	1.09056	0.700693	TCF7L1;ILK;TP53
Oxidative Damage Response WP3941	2/40	0.528691	0.795687	1.14797	0.73166	PCNA;TNF
Bladder Cancer WP2828	2/40	0.528691	0.795687	1.14797	0.73166	RASSF1;TP53
Regulation Of Wnt B Catenin Signaling Small Molecule Compounds WP3664	1/17	0.533547	0.795687	1.36323	0.85639	DKK3
Cells And Molecules Involved In Acute Inflammatory Response WP4493	1/17	0.533547	0.795687	1.36323	0.85639	TNF
Involvement Of Secretase In Neurodegenerative Diseases WP5372	1/17	0.533547	0.795687	1.36323	0.85639	SNCA
NOTCH1 Regulation Of Endothelial Cell Calcification WP3413	1/17	0.533547	0.795687	1.36323	0.85639	JAG1
Drug Induction Of Bile Acid Pathway WP2289	1/17	0.533547	0.795687	1.36323	0.85639	ABCC2
Iron Metabolism Disorders WP5172	1/17	0.533547	0.795687	1.36323	0.85639	HEPH
Serotonin And Anxiety WP3947	1/17	0.533547	0.795687	1.36323	0.85639	TRPV1
Orexin Receptor Pathway WP5094	4/88	0.542735	0.804062	1.03851	0.634669	PRKAA1;PRKCA;TNF;HCRTR2
Pathways Affected In Adenoid Cystic Carcinoma WP3651	3/65	0.547235	0.804062	1.05527	0.636198	TLK1;BCOR;TP53
Ferroptosis WP4313	3/65	0.547235	0.804062	1.05527	0.636198	FTMT;ACSL5;TP53
HDAC6 Interactions In The Central Nervous System WP5426	5/112	0.547887	0.804062	1.01903	0.61314	HSPA8;CNOT6;TUBB;MYH9;SNCA
Apoptosis Modulation And Signaling WP1772	4/89	0.551728	0.804062	1.02624	0.610303	ENDOG;IRAK1;CASP2;TP53
Pancreatic Adenocarcinoma Pathway WP4263	4/89	0.551728	0.804062	1.02624	0.610303	E2F2;TP53;RHOA;BUB1B-PAK6
Exosome Biogenesis Inhib And Secretion Manumycin A CRPC Cells WP4301	1/18	0.554019	0.804062	1.28297	0.757667	RAB5B
Transcription Co Factors SKI And SKIL Protein Partners WP4533	1/18	0.554019	0.804062	1.28297	0.757667	HDAC3
Proteoglycan Biosynthesis WP4784	1/18	0.554019	0.804062	1.28297	0.757667	B3GALT6
Estrogen Metabolism WP697	1/18	0.554019	0.804062	1.28297	0.757667	SULT1A1
Nephrogenesis WP5052	1/18	0.554019	0.804062	1.28297	0.757667	JAG1
Metabolic Reprogramming In Colon Cancer WP4290	2/42	0.555217	0.804062	1.09046	0.64162	PYCR1;SUCLG2
AMP Activated Protein Kinase Signaling WP1403	3/67	0.567929	0.81032	1.02219	0.578311	PRKAA1;PRKAB1;TP53
Cholesterol Biosynthesis Pathway In Hepatocytes WP5329	2/43	0.568078	0.81032	1.0638	0.601579	PLPP6;MSMO1
Inflammatory Bowel Disease Signaling WP5198	2/43	0.568078	0.81032	1.0638	0.601579	GATA3;TNF
Gastrin Signaling WP4659	5/115	0.571563	0.81032	0.991086	0.554395	PRKCH;JAG1;PRKCA;FYN;RHOA
Extracellular Vesicles In The Crosstalk Of Cardiac Cells WP4300	1/19	0.573592	0.81032	1.21163	0.673468	SORBS2
Disorders Of Folate Metabolism And Transport WP4259	1/19	0.573592	0.81032	1.21163	0.673468	MTHFR
Farnesoid X Receptor Pathway WP2879	1/19	0.573592	0.81032	1.21163	0.673468	CYP8B1
Apoptosis Modulation By HSP70 WP384	1/19	0.573592	0.81032	1.21163	0.673468	CASP2
TP53 Network WP1742	1/19	0.573592	0.81032	1.21163	0.673468	TP53
Cholestasis WP5238	1/19	0.573592	0.81032	1.21163	0.673468	ABCC2
Corticotropin Releasing Hormone Signaling WP2355	4/92	0.578133	0.81032	0.991097	0.543072	GNB1;PRKCA;RHOA;CACNA1H
Heart Development WP1591	2/44	0.580667	0.81032	1.03842	0.564464	HAND2;HEY2
Thyroid Hormones And Peripheral Downstream Signaling Effects WP4746	4/93	0.586735	0.81032	0.979909	0.522469	ADCY3;ITGAV;SIRT6;TP53
lncRNA In Canonical Wnt Signaling And Colorectal Cancer WP4258	4/93	0.586735	0.81032	0.979909	0.522469	PORCN;TCF7L1;FZD2;EZH2
Serotonin Receptor 2 And ELK SRF GATA4 Signaling WP732	1/20	0.592308	0.81032	1.1478	0.601136	ITPR1
Autophagy In Pancreatic Ductal Adenocarcinoma WP5331	1/20	0.592308	0.81032	1.1478	0.601136	TP53
Imatinib And Chronic Myeloid Leukemia WP3640	1/20	0.592308	0.81032	1.1478	0.601136	PDGFRB
Cell Differentiation Expanded Index WP2023	1/20	0.592308	0.81032	1.1478	0.601136	EZH2
Nanomaterial Induced Apoptosis WP2507	1/20	0.592308	0.81032	1.1478	0.601136	ENDOG
IL7 Signaling WP205	1/20	0.592308	0.81032	1.1478	0.601136	FYN
Aryl Hydrocarbon Receptor Pathway WP2873	2/45	0.592984	0.81032	1.01422	0.530019	ALDH3A1;TNF
Glycolysis And Gluconeogenesis WP534	2/45	0.592984	0.81032	1.01422	0.530019	ENO2;ENO3
Glucocorticoid Receptor Pathway WP2880	3/70	0.597853	0.81032	0.976263	0.5022	ADGRF4;SCNN1A;NFKB2
Ciliary Landscape WP4352	9/215	0.60418	0.81032	0.952155	0.479775	IQCB1;DYNC1H1;NUP133;GID8;RANBP10;COPS7A;NEFM;DCAF7;RAB8A
Translation Inhibitors In Chronically Activated PDGFRA Cells WP4566	2/46	0.605028	0.81032	0.991117	0.498017	RPS6KA2;PRKCA
Phosphatidyl Inositol Phosphate Pathway WP5411	2/46	0.605028	0.81032	0.991117	0.498017	PLCB4;PI4KA
NO cGMP PKG Mediated Neuroprotection WP4008	2/46	0.605028	0.81032	0.991117	0.498017	GUCY1A1;TNF
Pathogenesis Of SARS CoV 2 Mediated By Nsp9 Nsp10 Complex WP4884	1/21	0.610203	0.81032	1.09035	0.538595	FYN
Metabolism Of Sphingolipids In ER And Golgi Apparatus WP4142	1/21	0.610203	0.81032	1.09035	0.538595	CERS3
STING Pathway In Kawasaki Like Disease And COVID 19 WP4961	1/21	0.610203	0.81032	1.09035	0.538595	ITPR1
Urea Cycle And Metabolism Of Amino Groups WP497	1/21	0.610203	0.81032	1.09035	0.538595	PYCR1
Nicotine Effect On Dopaminergic Neurons WP1602	1/21	0.610203	0.81032	1.09035	0.538595	GNB1
GNAQ Pathways In Port Wine Stain WP5437	1/21	0.610203	0.81032	1.09035	0.538595	RHOA
Glycosphingolipid Metabolism WP5292	1/21	0.610203	0.81032	1.09035	0.538595	B4GALT4
Type II Diabetes Mellitus WP1584	1/21	0.610203	0.81032	1.09035	0.538595	TNF
Tamoxifen Metabolism WP691	1/21	0.610203	0.81032	1.09035	0.538595	SULT1A1
FOXA2 Pathway WP5066	1/21	0.610203	0.81032	1.09035	0.538595	ABCC2
Cholesterol Metab With Bloch And Kandutsch Russell Pathways WP4718	2/47	0.616801	0.81032	0.969041	0.46825	MSMO1;DHCR7
Wnt Signaling WP363	2/47	0.616801	0.81032	0.969041	0.46825	PRKCA;RHOA
Cholesterol Metabolism WP5304	3/72	0.617033	0.81032	0.947866	0.457661	OSBPL5;MSMO1;DHCR7
Chromosomal And Microsatellite Instability In Colorectal Cancer WP4216	3/73	0.626387	0.81032	0.934276	0.437042	TCF7L1;TP53;RHOA
Head And Neck Squamous Cell Carcinoma WP4674	3/73	0.626387	0.81032	0.934276	0.437042	PRKAA1;TP53;NFKB2
Transcription Factor Regulation In Adipogenesis WP3599	1/22	0.627314	0.81032	1.03838	0.484204	TNF
Synthesis Of Ceramides And 1 Deoxyceramides WP5194	1/22	0.627314	0.81032	1.03838	0.484204	CERS3
Glycerolipids And Glycerophospholipids WP4722	1/22	0.627314	0.81032	1.03838	0.484204	CDS1
Vitamin D In Inflammatory Diseases WP4482	1/22	0.627314	0.81032	1.03838	0.484204	TNF
Familial Hyperlipidemia Type 4 WP5111	1/22	0.627314	0.81032	1.03838	0.484204	ACSS1
NAD Biosynthetic Pathways WP3645	1/22	0.627314	0.81032	1.03838	0.484204	SIRT6
Fatty Acid Biosynthesis WP357	1/22	0.627314	0.81032	1.03838	0.484204	ACSL5
Pluripotent Stem Cell Differentiation Pathway WP2848	2/48	0.628301	0.81032	0.947925	0.440534	HGF;FGF4
Omega 6 Fatty Acids In Senescence WP5424	2/48	0.628301	0.81032	0.947925	0.440534	MAPK11;TP53
Arrhythmogenic Right Ventricular Cardiomyopathy WP2118	3/74	0.635584	0.816135	0.921069	0.417439	CACNB2;TCF7L1;ITGAV
16P11 2 Proximal Deletion Syndrome WP4949	3/74	0.635584	0.816135	0.921069	0.417439	PCNA;HDAC3;TP53
Hepatitis C And Hepatocellular Carcinoma WP3646	2/49	0.639532	0.816135	0.927708	0.414703	E2F2;TP53
IL3 Signaling WP286	2/49	0.639532	0.816135	0.927708	0.414703	YWHAB;FYN
Roles Of Ceramides In Development Of Insulin Resistance WP5181	1/23	0.643674	0.816135	0.991127	0.436654	TNF
Cancer Immunotherapy By PD 1 Blockade WP4585	1/23	0.643674	0.816135	0.991127	0.436654	CD3D
Eicosanoid Synthesis WP167	1/23	0.643674	0.816135	0.991127	0.436654	PLA2G4B
Estrogen Signaling WP712	1/23	0.643674	0.816135	0.991127	0.436654	GNB1
Synaptic Signaling Associated With Autism Spectrum Disorder WP4539	2/50	0.650493	0.821316	0.908333	0.390605	PRKAA1;PRKAB1
IL4 Signaling WP395	2/50	0.650493	0.821316	0.908333	0.390605	MAPK11;SOCS5
Regulation Of Apoptosis By Parathyroid Hormone Related Protein WP3872	1/24	0.659317	0.822094	0.947985	0.394884	BCL2L12
Follicle Stimulating Hormone FSH Signaling WP2035	1/24	0.659317	0.822094	0.947985	0.394884	PRKCA
Urea Cycle And Associated Pathways WP4595	1/24	0.659317	0.822094	0.947985	0.394884	PYCR1
IL1 And Megakaryocytes In Obesity WP2865	1/24	0.659317	0.822094	0.947985	0.394884	IRAK1
GPCRs Class B Secretin Like WP334	1/24	0.659317	0.822094	0.947985	0.394884	ADGRL3
MTHFR Deficiency WP4288	1/24	0.659317	0.822094	0.947985	0.394884	MTHFR
Nonalcoholic Fatty Liver Disease WP4396	6/154	0.672925	0.82869	0.883188	0.34985	PRKAA1;NDUFB7;DDIT3;UQCR11;TNF;PRKAB1
NF1 Copy Number Variation Syndrome WP5366	4/104	0.674243	0.82869	0.871615	0.343559	WDR48;PCNA;TUBB;RHOA
Differentiation Of White And Brown Adipocyte WP2895	1/25	0.674274	0.82869	0.908438	0.358033	ZNF423
S1P Receptor Signal Transduction WP26	1/25	0.674274	0.82869	0.908438	0.358033	S1PR3
Network Map Of SARS CoV 2 Signaling WP5115	10/254	0.68079	0.82869	0.892422	0.343138	TRO;CCNB2;HSPA8;CXCL10;CCL21;IRAK1;FYN;HBD;TNF;NFKB2
Electron Transport Chain OXPHOS System In Mitochondria WP111	4/105	0.681525	0.82869	0.86294	0.33087	ATP5IF1;NDUFB7;UQCR11;ATP5F1D
NRP1 Triggered Signaling In Pancreatic Cancer WP5144	2/53	0.681786	0.82869	0.854768	0.327409	HGF;NFKB2
Kit Receptor Signaling WP304	2/53	0.681786	0.82869	0.854768	0.327409	PRKCA;FYN
Focal Adhesion PI3K Akt mTOR Signaling WP3932	12/303	0.681927	0.82869	0.897777	0.343698	PDGFRB;FGF7;PRKAA1;HGF;GNB1;FGF18;COL4A6;ITGAV;FGF12;RAB8A;FGF4;CREB5
Adipogenesis WP236	5/131	0.685778	0.82869	0.864506	0.326092	BSCL2;DDIT3;ID3;GATA3;TNF
Warburg Effect Mod By Deubiquitinating Enzymes And Substrates WP5216	1/26	0.688575	0.82869	0.872055	0.325391	USP37
Cell Interactions Of The Pancreatic Cancer Microenvironment WP5284	1/26	0.688575	0.82869	0.872055	0.325391	CXCL10
Growth Factors And Hormones In Beta Cell Proliferation WP5385	1/26	0.688575	0.82869	0.872055	0.325391	RASSF1
Sphingolipid Metabolism Integrated Pathway WP4726	1/26	0.688575	0.82869	0.872055	0.325391	CERS3
Cytokines And Inflammatory Response WP530	1/26	0.688575	0.82869	0.872055	0.325391	TNF
EPO Receptor Signaling WP581	1/26	0.688575	0.82869	0.872055	0.325391	RASA1
TGF Beta Receptor Signaling WP560	2/54	0.691695	0.82869	0.838286	0.309	ZNF423;TNF
Notch Signaling WP61	2/54	0.691695	0.82869	0.838286	0.309	JAG1;HEY2
Angiopoietin Like Protein 8 Regulatory Pathway WP3915	5/132	0.692184	0.82869	0.857654	0.315534	MAP4K1;MAPK11;PRKAA1;RPS6KA2;PRKAB1
TGF Beta Signaling Pathway WP366	5/132	0.692184	0.82869	0.857654	0.315534	MAP4K1;CCNB2;TP53;RHOA;RBX1
Overlap Between Signal Transduction Pathways LMNA Laminopathies WP4879	2/55	0.701348	0.829136	0.822426	0.291756	TCF7L1;TARBP2
Hematopoietic SC Differentiation WP2849	2/55	0.701348	0.829136	0.822426	0.291756	MUC1;ACVR1B
Intracellular Trafficking Proteins Involved In CMT Neuropathy WP4856	1/27	0.702248	0.829136	0.83847	0.296373	PMP22
Intraflagellar Transport Proteins Binding To Dynein WP4532	1/27	0.702248	0.829136	0.83847	0.296373	DYNC1H1
Canonical And Non Canonical Notch Signaling WP3845	1/27	0.702248	0.829136	0.83847	0.296373	JAG1
Sphingolipid Metabolism Overview WP4725	1/27	0.702248	0.829136	0.83847	0.296373	CERS3
DNA Damage Response Only ATM Dependent WP710	4/109	0.709503	0.829136	0.829891	0.284811	TCF7L1;TP53;RHOA;NFKB2
5Q35 Copy Number Variation WP5380	4/109	0.709503	0.829136	0.829891	0.284811	PTPRN2;TPM2;SLC34A1;SNCA
Mitochondrial Complex I Assembly Model OXPHOS System WP4324	2/56	0.710749	0.829136	0.807153	0.275591	NDUFB7;DMAC1
Oncostatin M Signaling WP2374	2/56	0.710749	0.829136	0.807153	0.275591	PRKCH;PRKCA
MicroRNAs In Cardiomyocyte Hypertrophy WP1544	3/83	0.711165	0.829136	0.817062	0.278496	FZD2;TNF;RHOA
Interactions Of Natural Killer Cells In Pancreatic Cancer WP5092	1/28	0.715322	0.829136	0.807374	0.270488	TNF
Nanoparticle Mediated Activation Of Receptor Signaling WP2643	1/28	0.715322	0.829136	0.807374	0.270488	MAPK11
Eicosanoid Metabolism Via Lipooxygenases LOX WP4721	1/28	0.715322	0.829136	0.807374	0.270488	TRPV1
Angiotensin II Receptor Type 1 Pathway WP5036	1/28	0.715322	0.829136	0.807374	0.270488	ACTA2
Sphingolipid Metabolism In Senescence WP5121	1/28	0.715322	0.829136	0.807374	0.270488	PRKCA
Primary Ovarian Insufficiency WP5461	5/136	0.716906	0.829136	0.831291	0.276663	RECQL4;BLM;HELQ;WT1;CYP19A1
EGFR Tyrosine Kinase Inhibitor Resistance WP4806	3/84	0.718768	0.829136	0.806933	0.266462	PDGFRB;HGF;PRKCA
Apoptosis WP254	3/84	0.718768	0.829136	0.806933	0.266462	CASP2;TNF;TP53
Brain Derived Neurotrophic Factor BDNF Signaling WP2380	5/137	0.722861	0.832259	0.82495	0.267728	LINGO1;PRKAA1;DPYSL2;FYN;GRIA3
Clear Cell Renal Cell Carcinoma Pathways WP4018	3/85	0.726216	0.833184	0.79705	0.254983	PDGFRB;ENO2;ENO3
Extracellular Vesicle Mediated Signaling In Recipient Cells WP2870	1/29	0.727823	0.833184	0.778498	0.247327	HGF
Statin Inhibition Of Cholesterol Production WP430	1/29	0.727823	0.833184	0.778498	0.247327	ACSS1
MET In Type 1 Papillary Renal Cell Carcinoma WP4205	2/59	0.737472	0.836706	0.764551	0.232827	HGF;BUB1B-PAK6
Familial Partial Lipodystrophy WP5102	1/30	0.739775	0.836706	0.751614	0.226543	GATA3
Inflammatory Response Pathway WP453	1/30	0.739775	0.836706	0.751614	0.226543	CD40
Dopaminergic Neurogenesis WP2855	1/30	0.739775	0.836706	0.751614	0.226543	NKX2-2
Sphingolipid Pathway WP1422	1/30	0.739775	0.836706	0.751614	0.226543	CERS3
Hair Follicle Development Cytodifferentiation Stage 3 Of 3 WP2840	3/87	0.740645	0.836706	0.777991	0.233579	S100A4;GATA3;DKK3
Androgen Receptor Signaling WP138	3/87	0.740645	0.836706	0.777991	0.233579	RHOA;ETV5;BUB1B-PAK6
2Q13 Copy Number Variation Syndrome WP5222	2/60	0.745899	0.839486	0.75133	0.220264	GATA3;TTL
Oxidative Phosphorylation WP623	2/60	0.745899	0.839486	0.75133	0.220264	NDUFB7;ATP5F1D
Bardet Biedl Syndrome WP5234	3/88	0.74763	0.839861	0.768798	0.223603	IQCB1;GPR161;ARL3
Type I Interferon Induction And Signaling SARS CoV 2 Infection WP4868	1/31	0.751203	0.8423	0.726522	0.207843	TLR7
TNF Alpha Signaling WP231	3/89	0.754464	0.843536	0.759819	0.214077	FBXW11;TNF;NFKB2
ErbB Signaling WP673	3/90	0.761148	0.843536	0.751046	0.204981	PRKCA;TP53;BUB1B-PAK6
DYRK1A Involvement Regarding Cell Prolif In Brain Development WP5180	2/62	0.762059	0.843536	0.72621	0.197334	TP53;DCAF7
TYROBP Causal Network In Microglia WP3945	2/62	0.762059	0.843536	0.72621	0.197334	PYCARD;GAL3ST4
Proteasome Degradation WP183	2/62	0.762059	0.843536	0.72621	0.197334	PSMA4;PSME1
Initiation Of Transcription And Translation Elongation HIV1 LTR WP3414	1/32	0.76213	0.843536	0.703049	0.190975	HDAC3
Pregnane X Receptor Pathway WP2876	1/32	0.76213	0.843536	0.703049	0.190975	ABCC2
GPCRs Other WP117	3/91	0.767684	0.845754	0.742472	0.196293	PTGFR;OR5AC2;ADGRL3
Endochondral Ossification With Skeletal Dysplasias WP4808	2/63	0.769799	0.845754	0.714267	0.18687	KIF3A;FGF18
Oxidation By Cytochrome P450 WP43	2/63	0.769799	0.845754	0.714267	0.18687	CYP19A1;CYP8B1
Endochondral Ossification WP474	2/63	0.769799	0.845754	0.714267	0.18687	KIF3A;FGF18
Mammary Gland Development Pregnancy And Lactation Stage 3 Of 4 WP2817	1/33	0.772577	0.845754	0.681043	0.175725	ORAI1
Host Pathogen Interaction Of Human CoV Interferon Induction WP4880	1/33	0.772577	0.845754	0.681043	0.175725	TLR7
Metabolic Epileptic Disorders WP5355	3/92	0.774073	0.845851	0.734091	0.187993	ENO2;ENO3;SLC7A2
Effect Of Omega 3 PUFA On Huntington 39 S Disease Pathways WP5470	4/120	0.777056	0.845903	0.75076	0.189374	PRKAA1;ITPR1;DHCR7;PRKAB1
Type 2 Papillary Renal Cell Carcinoma WP4241	1/34	0.782566	0.845903	0.660371	0.161908	RBX1
Mitochondrial Complex IV Assembly WP4922	1/34	0.782566	0.845903	0.660371	0.161908	COA3
Fatty Acid Beta Oxidation WP143	1/34	0.782566	0.845903	0.660371	0.161908	ACSL5
Purinergic Signaling WP4900	1/34	0.782566	0.845903	0.660371	0.161908	ADORA1
Alstrom Syndrome WP5202	1/34	0.782566	0.845903	0.660371	0.161908	GPR161
AGE RAGE Pathway WP2324	2/66	0.791716	0.853441	0.680679	0.158974	PRKCA;RHOA
Complement System WP2806	3/95	0.79238	0.853441	0.710041	0.165237	CD40;FKBP2;PRKCA
Zinc Homeostasis WP3529	1/36	0.801248	0.861449	0.62257	0.137952	SLC30A3
Melanoma WP4685	2/68	0.805285	0.863494	0.659983	0.142925	E2F2;TP53
Photodynamic Therapy Induced HIF 1 Survival Signaling WP3614	1/37	0.809979	0.863494	0.605245	0.127553	TP53
Genetic Causes Of Porto Sinusoidal Vascular Disease WP5269	1/37	0.809979	0.863494	0.605245	0.127553	DGUOK
IL2 Signaling WP49	1/37	0.809979	0.863494	0.605245	0.127553	FYN
Trans Sulfuration One Carbon Metabolism And Related Pathways WP2525	2/69	0.811771	0.863494	0.650098	0.13557	MTHFD1L;MTHFR
Th17 Cell Differentiation Pathway WP5130	2/69	0.811771	0.863494	0.650098	0.13557	GATA3;CD3D
Nuclear Receptors Meta Pathway WP2882	11/314	0.816538	0.864349	0.788954	0.159906	SULT1A1;ALDH3A1;ABCC2;HGF;ADGRF4;SCNN1A;KLK15;SLC6A1;CYP8B1;TNF;NFKB2
Type II Interferon Signaling WP619	1/38	0.818327	0.864349	0.588856	0.118062	CXCL10
Nuclear Receptors WP170	1/38	0.818327	0.864349	0.588856	0.118062	NR2F2
G13 Signaling WP524	1/38	0.818327	0.864349	0.588856	0.118062	RHOA
Ebola Virus Infection In Host WP4217	4/129	0.822561	0.867297	0.696376	0.136025	ITGAV;FLNB;RHOA;NFKB2
Immune Infiltration In Pancreatic Cancer WP5285	1/39	0.826308	0.869722	0.57333	0.109384	TNF
Glycogen Synthesis And Degradation WP500	1/40	0.833939	0.87622	0.5586	0.101439	GYG1
Prolactin Signaling WP2037	2/74	0.841383	0.882498	0.604794	0.104453	RPS6KA2;FYN
Vitamin A And Carotenoid Metabolism WP716	1/43	0.854882	0.895094	0.518618	0.0813153	SULT1A1
Neurodegeneration W Brain Fe Accumulation NBIA Subtypes Pathway WP4577	1/44	0.861259	0.897082	0.506531	0.0756556	PRKAA1
Perturbations Host Cell Autophagy Induced By SARS CoV 2 Prots WP4936	1/44	0.861259	0.897082	0.506531	0.0756556	CALCOCO2
IL11 Signaling WP2332	1/44	0.861259	0.897082	0.506531	0.0756556	FYN
15Q25 Copy Number Variation WP5408	1/45	0.867356	0.900145	0.494993	0.0704404	ITPR1
TROP2 Regulatory Signaling WP5300	1/45	0.867356	0.900145	0.494993	0.0704404	PRKCA
NRF2 Pathway WP2884	4/141	0.871022	0.900145	0.634978	0.0876827	ALDH3A1;ABCC2;HGF;SLC6A1
Clock Controlled Autophagy In Bone Metabolism WP5205	2/80	0.871306	0.900145	0.558095	0.0768844	CALCA;NPAS2
T Cell Modulation In Pancreatic Cancer WP5078	1/46	0.873185	0.900145	0.483968	0.0656296	CD40
Aryl Hydrocarbon Receptor Pathway WP2586	1/46	0.873185	0.900145	0.483968	0.0656296	TNF
Cytokine Cytokine Receptor Interaction WP5473	8/255	0.875362	0.900844	0.703531	0.0936523	CXCL10;CD40;CCL21;TNFRSF18;CCL19;ACVR1B;TNF;ACVR2A
Rett Syndrome WP4312	1/48	0.884088	0.908111	0.463325	0.0570811	CHD4
GPCRs Class A Rhodopsin Like WP455	8/259	0.885446	0.908111	0.692173	0.0842124	PTGFR;GPR39;TBXA2R;GPR161;RHO;ADORA1;NMUR1;HCRTR2
Osteoarthritic Chondrocyte Hypertrophy WP5373	1/50	0.894054	0.91382	0.444367	0.0497643	PRKCA
RANKL RANK Signaling WP2018	1/50	0.894054	0.91382	0.444367	0.0497643	NFKB2
Copper Homeostasis WP3286	1/51	0.898711	0.917021	0.435457	0.046504	TP53
Cytoplasmic Ribosomal Proteins WP477	2/88	0.903143	0.919982	0.505967	0.0515448	RPS6KA2;RPL13
8P23 1 Copy Number Variation Syndrome WP5346	1/54	0.911491	0.923788	0.410744	0.0380648	FAM167A
Interferon Type I Signaling WP585	1/54	0.911491	0.923788	0.410744	0.0380648	FYN
IL1 Signaling WP195	1/54	0.911491	0.923788	0.410744	0.0380648	IRAK1
B Cell Receptor Signaling WP23	2/92	0.91615	0.926946	0.483378	0.0423319	MAP4K1;FYN
10Q22Q23 Copy Number Variation WP5402	1/62	0.938236	0.946107	0.356726	0.0227428	BUB1B
TAR Syndrome WP5362	1/62	0.938236	0.946107	0.356726	0.0227428	CD3D
Acute Myeloid Leukemia WP5293	1/68	0.952847	0.959231	0.324678	0.0156824	TCF7L1
Senescence Associated Secretory Phenotype SASP WP3391	2/113	0.961414	0.966237	0.391495	0.0154054	RPS6KA2;ANAPC5
Vitamin D Receptor Pathway WP2877	4/186	0.965383	0.968606	0.476845	0.0167994	CD40;HSD17B2;S100A4;TRAK1
Complement System In Neuronal Development And Plasticity WP5090	1/106	0.991482	0.992888	0.206762	0.00176866	ITGAV
CAMKK2 Pathway WP4874	1/110	0.992888	0.992888	0.199133	0.00142137	TNF

## Sheet: BioPlanet
Term	Overlap	P-value	Adjusted p-value	Odds Ratio	Combined Score	Genes
MAPK signaling pathway	30/314	5.65753e-05	0.0621763	2.34951	22.9781	PTPRR;ACVR1B;TNF;CACNA1H;FGF4;CACNA1I;FGF7;RPS6KA2;MKNK1;STMN1;CASP2;FLNB;MAP4K1;PDGFRB;HSPA8;PRKCH;HSPA5;PLA2G4B;PRKCA;HSPA2;CDC25B;NFKB2;CACNB2;MAPK11;DDIT3;JMJD7-PLA2G4B;RASA1;FGF18;TP53;FGF12
Vascular smooth muscle contraction	15/116	0.000166865	0.087956	3.27732	28.5072	PRKCH;PLA2G4B;ITPR1;ADCY3;PRKCA;ITPR3;ADCY1;RHOA;ADCY6;ACTA2;PLCB4;KCNMB1;JMJD7-PLA2G4B;MYH11;MYL9
Transmission across chemical synapses	20/190	0.000268033	0.087956	2.60183	21.3985	HSPA8;SNAP25;GABBR1;SLC22A2;ADCY3;KCNJ16;PRKCA;GRIK1;ADCY1;AP2B1;SLC6A1;SYN3;ADCY6;NCALD;CACNB2;CHRNG;RPS6KA2;GNB1;GRIA3;GRIA4
Neuronal system	26/283	0.000320131	0.087956	2.2428	18.0473	KCNG1;SNAP25;SLC22A2;ADCY3;GRIK1;KCNA5;ADCY1;SLC6A1;ADCY6;NCALD;CHRNG;RPS6KA2;KCNMB1;GRIA3;KCNH1;GRIA4;HSPA8;GABBR1;KCNH8;KCNJ16;PRKCA;KCNK17;AP2B1;SYN3;CACNB2;GNB1
Phospholipase C-mediated cascade	9/54	0.000518094	0.113877	4.39585	33.2562	FGF7;FGF18;ITPR1;ADCY3;PRKCA;ITPR3;ADCY1;ADCY6;FGF4
cAMP cell motility pathway inferred from amoeba model	10/67	0.000640488	0.117316	3.85803	28.3692	CYFIP2;ACTA2;ACTA1;PLCB4;PDE4D;ITPR1;PDE5A;ITPR3;CCL19;PDE6A
Signaling by FGFR in disease	14/128	0.00147632	0.212851	2.70503	17.6319	CPSF6;YWHAB;ITPR1;ADCY3;PRKCA;ITPR3;ADCY1;ADCY6;FGF4;FGF7;MKNK1;FGF18;CNTRL;MYO18A
Pancreatic secretion	12/101	0.00154941	0.212851	2.96692	19.1956	PLCB4;FXYD2;PLA2G4B;JMJD7-PLA2G4B;ITPR1;ADCY3;PRKCA;ITPR3;ADCY1;RAB8A;RHOA;ADCY6
Smooth muscle contraction	5/22	0.00226307	0.276346	6.44428	39.2523	ACTA2;TPM2;MYH11;SORBS3;MYL9
Arylamine metabolism	3/7	0.0025754	0.282075	16.4065	97.8112	SULT1A1;NAT1;SULT1A2
G-protein-mediated events	7/44	0.00282332	0.282075	4.15042	24.3623	PLCB4;ITPR1;ADCY3;ITPR3;PRKCA;ADCY1;ADCY6
Myometrial relaxation and contraction pathways	15/155	0.00341418	0.312682	2.3595	13.4016	CALCA;PRKCH;YWHAB;PDE4D;ITPR1;ADCY3;PRKCA;ITPR3;ADCY1;RYR3;ADCY6;ACTA2;ACTA1;GNB1;RGS9
Chromatin remodeling by nuclear receptors to facilitate initiation of transcription in carcinoma cells	3/8	0.00398679	0.337037	13.1245	72.5097	GTF2A1;HDAC3;TBP
GluR2-containing AMPA receptor trafficking	4/16	0.00437908	0.341672	7.29706	39.6297	PRKCA;AP2B1;GRIA3;GRIA4
Salivary secretion	10/89	0.00554574	0.341672	2.78043	14.4436	PLCB4;DMBT1;FXYD2;ITPR1;ADCY3;PRKCA;ITPR3;ADCY1;RYR3;ADCY6
Elevation of cytosolic calcium levels	3/9	0.00578638	0.341672	10.9365	56.3476	ITPR1;ORAI1;ITPR3
EGFR interaction with phospholipase C-gamma	6/38	0.00580436	0.341672	4.10972	21.1615	ITPR1;ADCY3;ITPR3;PRKCA;ADCY1;ADCY6
Signaling events mediated by HDAC class II	6/38	0.00580436	0.341672	4.10972	21.1615	TUBA1B;HDAC3;YWHAB;NUP62;GNB1;BCOR
Gap junction pathway	10/90	0.00600056	0.341672	2.74553	14.0459	PDGFRB;TUBA1B;PLCB4;TUBB;ITPR1;ADCY3;PRKCA;ITPR3;ADCY1;ADCY6
Developmental biology	30/420	0.00621787	0.341672	1.7013	8.64315	SEMA7A;CNTNAP1;HDAC3;YWHAB;ACVR1B;TNF;CACNA1H;MED17;MED12;CACNA1I;DPYSL2;RPS6KA2;BOC;ITGAV;FYN;MYH11;NKX2-2;NR2F2;AP2B1;MED29;RHOA;ACVR2A;GFRA4;CACNB2;MAPK11;ARTN;CNTN1;COL4A5;MYH9;MYL9
Angiotensin II-stimulated signaling through G-proteins and beta-arrestin	8/64	0.00667141	0.349137	3.13447	15.7035	MAPK11;PRKCH;PLCB4;ITPR1;ORAI1;PRKCA;ITPR3;RHOA
Adrenergic pathway	13/137	0.0072594	0.358137	2.30536	11.355	PRKCH;PDE4D;ITPR1;ADCY3;PRKCA;ITPR3;ADCY1;ADCY6;MAPK11;PLCB4;PDE5A;PDE6A;RGS9
PAC1 receptor pathway	6/40	0.00749513	0.358137	3.86756	18.9259	PRKCH;PLCB4;ADCY3;PRKCA;ADCY1;ADCY6
Opioid signaling	9/80	0.00823659	0.364467	2.78231	13.3528	PLCB4;PDE4D;GNB1;ITPR1;ADCY3;PRKCA;ITPR3;ADCY1;ADCY6
Axon guidance	24/325	0.0091743	0.364467	1.75939	8.2539	NTNG1;SEMA6C;SEMA7A;CNTNAP1;YWHAB;AP2B1;RHOA;CACNA1H;GFRA4;CACNB2;CACNA1I;ARTN;DPYSL2;RPS6KA2;RASA1;CNTN1;COL4A5;MYH9;MYH11;ITGAV;FYN;EPHA1;MYL9;EPHB3
CD8/T cell receptor downstream pathway	8/68	0.00956682	0.364467	2.92489	13.5992	EOMES;IFNA4;IFNA17;TNFRSF18;PRKCA;CD3D;TNF;IFNA10
Oocyte meiosis	11/113	0.0107962	0.364467	2.36869	10.7267	CCNB2;FBXW11;YWHAB;RPS6KA2;ITPR1;ADCY3;ANAPC5;ITPR3;ADCY1;ADCY6;RBX1
Thromboxane A2 receptor signaling	7/56	0.0108732	0.364467	3.13202	14.1613	MAPK11;PRKCH;TBXA2R;GNB1;PRKCA;FYN;RHOA
NCAM signaling for neurite out-growth	8/70	0.0113233	0.364467	2.83025	12.682	CACNB2;CACNA1I;YWHAB;ARTN;COL4A5;FYN;CACNA1H;GFRA4
Signaling events mediated by VEGFR1 and VEGFR2	8/70	0.0113233	0.364467	2.83025	12.682	MAPK11;PRKAA1;FBXW11;ITGAV;PRKCA;FYN;PRKAB1;RHOA
NCAM1 interactions	6/44	0.011895	0.364467	3.45973	15.3323	CACNA1I;CACNB2;ARTN;COL4A5;CACNA1H;GFRA4
Asparagine N-linked glycosylation	9/85	0.012066	0.364467	2.59858	11.4789	GMPPB;ALG8;DAD1;GMPPA;MGAT4B;STT3A;SEC24C;B4GALT4;SEC31A
Melanoma	8/71	0.0122857	0.364467	2.78518	12.2529	PDGFRB;FGF7;HGF;FGF18;E2F2;TP53;FGF12;FGF4
Mitochondrial pathway of apoptosis: multidomain Bcl-2 family	8/71	0.0122857	0.364467	2.78518	12.2529	ENDOG;PRKCH;CAPN10;ITPR1;PRKCA;ITPR3;HSPA2;TP53
Dilated cardiomyopathy	10/100	0.0123128	0.364467	2.43919	10.7254	CACNB2;PRKAA1;TPM2;TNNC1;ADCY3;ITGAV;ADCY1;TNF;PRKAB1;ADCY6
GnRH signaling pathway	10/101	0.0131468	0.364467	2.41226	10.4489	MAPK11;PLCB4;PLA2G4B;JMJD7-PLA2G4B;ITPR1;ADCY3;PRKCA;ITPR3;ADCY1;ADCY6
G alpha (z) signaling events	6/45	0.0132297	0.364467	3.37084	14.5799	PRKCH;GNB1;ADCY3;PRKCA;ADCY1;ADCY6
Signaling by FGFR mutants	6/45	0.0132297	0.364467	3.37084	14.5799	FGF7;CPSF6;CNTRL;FGF18;MYO18A;FGF4
Calcium regulation in the cardiac cell	13/149	0.0141242	0.364467	2.10062	8.94836	PRKCH;YWHAB;ITPR1;ADCY3;PRKCA;ITPR3;ADCY1;RYR3;ADCY6;GJC2;FXYD2;GNB1;RGS9
RNA polymerase II promoter escape	4/22	0.0142892	0.364467	4.86318	20.66	GTF2A1;TBP;ERCC2;TAF1
Signaling by NOTCH1	8/73	0.0143885	0.364467	2.69919	11.4482	HEYL;KAT2A;HDAC3;JAG1;HEY2;CNTN1;MAMLD1;RBX1
Metabolism	89/1615	0.0145112	0.364467	1.30241	5.51289	PNMT;PCSK1;PIGU;MSMO1;ENO2;ENO3;PFAS;HS6ST2;GALNT10;MED17;MED12;GMPPB;GUK1;DSE;NUP62;FPGS;GMPPA;PGLS;SEPHS1;GYG1;EARS2;CERS3;ALG8;NUP133;PLA2G4B;GLCE;AKR1A1;ACSL5;CTPS2;AMPD3;MED29;APRT;GCHFR;CACNB2;ALDH3A1;BDH2;PLCB4;DAD1;JMJD7-PLA2G4B;SUCLG2;PAFAH1B3;B4GALT4;CDS1;NUP205;NDUFB7;HDAC3;RPE;ITPR1;ADCY3;ITPR3;UQCR11;NRF1;ADCY1;MTMR4;CYP19A1;NPAS2;FUT4;ADCY6;HSD11B2;DGUOK;MTHFD1L;HSD17B2;ACSS1;HMOX2;…
Gastric acid secretion	8/74	0.0155328	0.364467	2.65816	11.0707	PLCB4;ITPR1;ADCY3;KCNJ16;PRKCA;ITPR3;ADCY1;ADCY6
Seven transmembrane receptor signaling through beta-arrestin	8/74	0.0155328	0.364467	2.65816	11.0707	ACTA2;ACTA1;MAPK11;PDE4D;PDE5A;PDE6A;RHOA;NFKB2
Carbohydrate metabolism	18/235	0.0157639	0.364467	1.82566	7.57654	NUP205;NUP133;GLCE;RPE;B3GAT2;B3GALT6;ENO2;ENO3;HS3ST4;HS6ST2;TPR;DSE;NUP62;PGLS;SLC37A4;GYG1;B4GALT4;GALK1
Regulation of transcription by NOTCH1 intracellular domain	6/47	0.0162065	0.364467	3.20607	13.2165	HEYL;KAT2A;HDAC3;HEY2;MAMLD1;RBX1
T cell receptor regulation of apoptosis	38/603	0.0162934	0.364467	1.48766	6.1247	FKBP2;NDUFB7;SERPINE2;EI24;PRUNE2;ILK;GATA3;TNF;PYCARD;BCL2L12;CCNB2;MKNK1;ADORA1;CASP2;LGALS8;MAP4K1;HSPA8;HSPA5;MBD1;TNFRSF18;TUBB;MTHFR;TAS2R14;HSPA2;CS;CXCL10;CENPF;SON;AMACR;MMRN1;DAD1;DDIT3;ERCC2;PSME1;S100A4;TLR7;PLA2R1;EPHA1
Visual signal transduction: rods	4/23	0.0167103	0.364467	4.60698	18.8505	GNB1;RHO;PDE6A;RGS9
Adenylate cyclase inhibitory pathway	3/13	0.0172823	0.364467	6.56053	26.6231	ADCY3;ADCY1;ADCY6
Purine salvage	3/13	0.0172823	0.364467	6.56053	26.6231	DGUOK;AMPD3;APRT
CREB phosphorylation through the activation of adenylate cyclase	2/5	0.0175808	0.364467	14.5676	58.867	ADCY3;ADCY1
Cyclin B2-mediated events	2/5	0.0175808	0.364467	14.5676	58.867	CCNB2;CDC25B
GDP-mannose biosynthesis	2/5	0.0175808	0.364467	14.5676	58.867	GMPPB;GMPPA
Signaling by NGF	17/221	0.0179083	0.364467	1.83324	7.37418	LINGO1;HDAC3;RIPK2;YWHAB;ITPR1;ADCY3;PRKCA;ITPR3;ADCY1;AP2B1;RHOA;ADCY6;MAPK11;IRAK1;RPS6KA2;CASP2;ITGB3BP
Neurotransmitter release cycle	5/36	0.0195683	0.378208	3.53137	13.8919	SNAP25;HSPA8;SLC22A2;SLC6A1;SYN3
Phospholipids as signaling intermediaries	5/36	0.0195683	0.378208	3.53137	13.8919	GNB1;ITGAV;PRKCA;ADCY1;RHOA
Muscle contraction	6/49	0.0196159	0.378208	3.05663	12.0169	ACTA2;TNNC1;TPM2;MYH11;MYL9;SORBS3
Visual signal transduction	3/14	0.0212912	0.399913	5.9638	22.9574	GNB1;RHO;PDE6A
Factors involved in megakaryocyte development and platelet production	11/125	0.0215772	0.399913	2.11802	8.12496	RAD51B;IFNA4;KIF5C;KIF3A;DOCK9;IFNA17;KIF2C;GATA3;HBD;TP53;IFNA10
Activation of NMDA receptor upon glutamate binding and postsynaptic events	5/37	0.0218333	0.399913	3.42084	13.0824	RPS6KA2;ADCY3;ADCY1;GRIA3;GRIA4
FSH regulation of apoptosis	19/263	0.0232045	0.404491	1.71339	6.44818	CEP135;TUBB;TPM2;ITPR1;ILK;MSMO1;RASAL2;CYP19A1;JMJD6;ACTA2;ACTA1;WT1;P4HA2;GNB1;TLK1;S100A4;DHCR7;TP53;PLA1A
G-protein signaling pathways	9/95	0.0234861	0.404491	2.29521	8.61013	PRKCH;PDE4D;GNB1;ITPR1;ADCY3;PRKCA;ADCY1;RHOA;ADCY6
Striated muscle contraction	5/38	0.0242619	0.404491	3.317	12.3354	ACTA2;ACTA1;TNNC1;TPM2;MYL9
Hemostasis pathway	30/468	0.0247943	0.404491	1.51097	5.58628	IFNA4;WDR1;DOCK9;ITPR1;ITPR3;GATA3;HBD;TBXA2R;KIF5C;KIF3A;KCNMB1;ITGAV;FYN;PDE6A;PRKCH;PPIL2;HSPA5;IFNA17;HGF;PRKCA;RHOA;RAD51B;MMRN1;GNB1;ORAI1;KIF2C;PDE5A;CD47;TP53;IFNA10
Semaphorin interactions	7/66	0.0251432	0.404491	2.59981	9.57552	SEMA7A;DPYSL2;MYH9;FYN;MYH11;MYL9;RHOA
Glycosaminoglycan biosynthesis: heparan sulfate	4/26	0.0254455	0.404491	3.97813	14.6046	B3GAT2;GLCE;B3GALT6;HS6ST2
Selenoamino acid metabolism	4/26	0.0254455	0.404491	3.97813	14.6046	MARS2;SCLY;SEPHS1;LCMT1
G beta-gamma signaling through PI3K gamma	2/6	0.0256106	0.404491	10.9251	40.0379	GNB1;RHOA
TGF-beta regulation of extracellular matrix	35/565	0.0256486	0.404491	1.45824	5.34193	MIPEP;CNTNAP1;PTPRR;GYPC;TNFAIP2;MTMR4;FUT4;FGF7;DPYSL2;STMN1;E2F2;FYN;DACT1;TCF7L1;JAG1;BTN2A1;HGF;PLA2G4C;PCDHGC3;ZNF10;MICAL2;NR2F2;ETV5;CDC25B;ACTA2;HEYL;ACTA1;BFSP1;HAND2;FKBP1B;FGF18;MYH9;PDE5A;PLA2R1;EPHA1
Lagging strand processive biosynthesis	3/15	0.0257638	0.404491	5.46653	20.0009	POLA2;PCNA;RPA2
Amyotrophic lateral sclerosis (ALS)	6/53	0.0278302	0.424797	2.79591	10.0139	MAPK11;NEFM;TNF;TP53;TOMM40L;PRPH
GABA A and B receptor activation	6/53	0.0278302	0.424797	2.79591	10.0139	GABBR1;GNB1;ADCY3;KCNJ16;ADCY1;ADCY6
Potassium channels	9/99	0.0297121	0.445474	2.19274	7.71012	KCNG1;GABBR1;KCNH8;KCNMB1;GNB1;KCNJ16;KCNA5;KCNK17;KCNH1
Control of cell cycle and breast tumor growth by estrogen-responsive protein Efp	3/16	0.0306987	0.445474	5.04577	17.5771	CCNB2;TRIM25;TP53
LPA4-mediated signaling events	3/16	0.0306987	0.445474	5.04577	17.5771	ADCY3;ADCY1;ADCY6
Nitric oxide stimulation of guanylate cyclase	4/28	0.0325419	0.445474	3.64624	12.4892	KCNMB1;ITPR1;PDE5A;PDE6A
G alpha q pathway	7/70	0.0333696	0.445474	2.43423	8.27664	PRKCH;ITPR1;ORAI1;PRKCA;ITPR3;RGS9;NFKB2
Long-term depression	7/70	0.0333696	0.445474	2.43423	8.27664	PLCB4;PLA2G4B;JMJD7-PLA2G4B;ITPR1;PRKCA;ITPR3;GRIA3
Nucleotide metabolism	7/70	0.0333696	0.445474	2.43423	8.27664	DGUOK;DUT;GUK1;CTPS2;AMPD3;PFAS;APRT
Progesterone-mediated oocyte maturation	8/86	0.034788	0.445474	2.24779	7.54918	CCNB2;MAPK11;RPS6KA2;ADCY3;ANAPC5;ADCY1;ADCY6;CDC25B
Neurofascin interactions	2/7	0.0348247	0.445474	8.73966	29.3428	CNTNAP1;CNTN1
Spermatogenesis regulation by CREM	2/7	0.0348247	0.445474	8.73966	29.3428	ADCY1;KIF17
TNF-alpha effects on cytokine activity, cell motility, and apoptosis	11/135	0.0353562	0.445474	1.94618	6.50469	CXCL10;CD40;JAG1;FNBP1;RIPK2;HGF;ITPR1;TNFAIP2;EPHA1;TNF;NFKB2
RIG-I-like receptor signaling pathway	7/71	0.0356757	0.445474	2.39607	7.98678	IFNA4;CXCL10;MAPK11;IFNA17;TRIM25;TNF;IFNA10
Hexose transport	5/42	0.0356775	0.445474	2.95779	9.85899	NUP205;NUP133;NUP62;TPR;SLC37A4
Chromatin remodeling by hSWI/SNF ATP-dependent complexes	3/17	0.036092	0.445474	4.68511	15.5625	GTF2A1;SMARCC2;TBP
TAK1-mediated activation of p38 MAPK	3/17	0.036092	0.445474	4.68511	15.5625	MAPK11;IRAK1;RIPK2
Phototransduction	4/29	0.036481	0.445474	3.50021	11.5891	GNB1;RHO;PDE6A;RGS9
S1P/S1P3 pathway	4/29	0.036481	0.445474	3.50021	11.5891	PDGFRB;ITGAV;S1PR3;RHOA
Sema4D in semaphorin signaling	4/29	0.036481	0.445474	3.50021	11.5891	MYH9;MYH11;MYL9;RHOA
NGF signaling via TRKA from the plasma membrane	11/136	0.0370111	0.44698	1.93051	6.36401	MAPK11;YWHAB;RPS6KA2;ITPR1;ADCY3;PRKCA;ITPR3;ADCY1;AP2B1;RHOA;ADCY6
Beta-3 integrin cell surface interactions	5/43	0.0389696	0.465517	2.8798	9.34487	PDGFRB;COL4A6;COL4A5;ITGAV;CD47
Glutamate binding and activation of AMPA receptors and synaptic plasticity	4/30	0.0406826	0.470634	3.36541	10.7759	PRKCA;AP2B1;GRIA3;GRIA4
Signaling by FGFR1 mutants	4/30	0.0406826	0.470634	3.36541	10.7759	CPSF6;CNTRL;MYO18A;FGF4
TRAF6-mediated IRF7 activation	4/30	0.0406826	0.470634	3.36541	10.7759	IFNA4;IFNA17;TRIM25;IFNA10
PKA activation in glucagon signaling	3/18	0.041937	0.475942	4.37254	13.8679	ADCY3;ADCY1;ADCY6
Signaling by PDGF	10/122	0.0420464	0.475942	1.9578	6.20423	PDGFRB;YWHAB;RASA1;ITPR1;COL4A5;ADCY3;PRKCA;ITPR3;ADCY1;ADCY6
Vasopressin-regulated water reabsorption	5/44	0.0424407	0.475942	2.80581	8.86537	DYNC1H1;RAB5B;ADCY3;ADCY6;CREB5
Wnt/calcium/cyclic GMP pathway	7/74	0.0432166	0.479748	2.28842	7.18914	PRKCH;PLCB4;FZD2;ITPR1;PRKCA;ITPR3;PDE6A
Folate and pterine metabolism	2/8	0.045104	0.481714	7.28267	22.5674	FPGS;MTHFR
Hydrolysis of lysophosphatidylcholine (LPC)	2/8	0.045104	0.481714	7.28267	22.5674	PLA2G4B;PLA2G4C
Support of platelet aggregation by Eph kinases and ephrins	2/8	0.045104	0.481714	7.28267	22.5674	ACTA1;FYN
DNA strand elongation	4/31	0.045147	0.481714	3.24059	10.0388	GINS2;POLA2;PCNA;RPA2
G alpha i pathway	9/108	0.0477346	0.482123	1.99246	6.06126	MAPK11;PRKCH;ITPR1;ADCY3;PRKCA;ITPR3;ADCY1;RGS9;ADCY6
GABA biosynthesis, release, reuptake and degradation	3/19	0.0482251	0.482123	4.09904	12.4278	HSPA8;SNAP25;SLC6A1
Platelet calcium homeostasis	3/19	0.0482251	0.482123	4.09904	12.4278	ITPR1;ORAI1;ITPR3
Signaling by FGFR1 fusion mutants	3/19	0.0482251	0.482123	4.09904	12.4278	CPSF6;CNTRL;MYO18A
Small ligand GPCRs	3/19	0.0482251	0.482123	4.09904	12.4278	PTGFR;TBXA2R;S1PR3
Telomeres, telomerase, cellular aging, and immortality	3/19	0.0482251	0.482123	4.09904	12.4278	TEP1;PRKCA;TP53
Integration of energy metabolism	10/125	0.0482561	0.482123	1.90642	5.77881	CACNB2;PCSK1;SNAP25;GNB1;ITPR1;ADCY3;PRKCA;ITPR3;ADCY1;ADCY6
Hypothetical network for drug addiction	4/32	0.0498735	0.491004	3.12469	9.36866	ACTA1;ADCY1;GRIA3;GRIA4
Calcium signaling pathway	13/178	0.0500386	0.491004	1.72877	5.17761	PDGFRB;PTGFR;TNNC1;ITPR1;ADCY3;PRKCA;ITPR3;ADCY1;CACNA1H;RYR3;CACNA1I;PLCB4;TBXA2R
Nucleotide-binding domain, leucine rich repeat containing receptor (NLR) signaling pathways	5/47	0.0539386	0.515132	2.60499	7.60632	PYCARD;MAPK11;IRAK1;RIPK2;CASP2
Fluoropyrimidine activity	4/33	0.0548611	0.515132	3.01679	8.75759	FPGS;ERCC2;MTHFR;TP53
Glucagon signaling in metabolic regulation	4/33	0.0548611	0.515132	3.01679	8.75759	GNB1;ADCY3;ADCY1;ADCY6
HIV factor interactions with host	10/128	0.055053	0.515132	1.85766	5.38622	NUP205;PSMA4;NUP133;TPR;NUP62;PSME1;AP1S1;FYN;AP2B1;RBX1
Axonogenesis regulation by p75 neurotrophin receptor	2/9	0.0563376	0.515132	6.24196	17.9543	LINGO1;RHOA
COPII-mediated vesicle transport	2/9	0.0563376	0.515132	6.24196	17.9543	SEC24C;SEC31A
Prostanoid ligand receptors	2/9	0.0563376	0.515132	6.24196	17.9543	PTGFR;TBXA2R
Rapid glucocorticoid receptor pathway	2/9	0.0563376	0.515132	6.24196	17.9543	MAPK11;GNB1
Purine metabolism	12/164	0.0574502	0.515132	1.73146	4.94649	DGUOK;POLA2;GUK1;PDE4D;ADCY3;PDE5A;AMPD3;ADCY1;PDE6A;PFAS;ADCY6;APRT
Cell-cell communication	10/129	0.0574518	0.515132	1.84195	5.26211	CLDN10;MAPK11;CDH3;KIRREL2;FBLIM1;ILK;FYN;CD47;DSCAML1;PLEC
HIV infection	14/200	0.0576536	0.515132	1.65164	4.71263	GTF2A1;NUP205;TBP;NUP133;AP2B1;RBX1;PSMA4;TPR;NUP62;ERCC2;PSME1;AP1S1;FYN;TAF1
Endothelins	6/64	0.061053	0.522195	2.26434	6.33113	PRKCH;ADCY3;PRKCA;ADCY1;RHOA;ADCY6
ChREBP regulation by carbohydrates and cAMP	3/21	0.062086	0.522195	3.64321	10.1253	PRKAA1;ADCY1;PRKAB1
Oxidative stress-induced gene expression via Nrf2	3/21	0.062086	0.522195	3.64321	10.1253	FXYD2;PRKCA;HMOX2
S1P/S1P1 pathway	3/21	0.062086	0.522195	3.64321	10.1253	PDGFRB;ITGAV;RHOA
p38 MK2 pathway	3/21	0.062086	0.522195	3.64321	10.1253	MAPK11;YWHAB;CDC25B
Messenger RNA processing	14/203	0.0636135	0.522195	1.62517	4.47722	RBM39;NUP205;NUP133;ADARB1;CLK2;HNRNPUL1;PCF11;PRPF3;TPR;NUP62;ERCC2;CLASRP;SUGP2;RBM5
Antigen processing and presentation	7/81	0.0645812	0.522195	2.07119	5.6747	HSPA8;HSPA5;RFX5;PSME1;HSPA2;TNF;TAPBP
Autophagy regulation	4/35	0.06561	0.522195	2.82186	7.68682	IFNA4;PRKAA1;IFNA17;IFNA10
Basal transcription factors	4/35	0.06561	0.522195	2.82186	7.68682	TAF7L;GTF2A1;TBP;TAF1
Cell cycle	27/453	0.0665715	0.522195	1.39414	3.7774	DIDO1;HDAC3;PCNA;ZWILCH;YWHAB;BUB1B;ORC4;CCNB2;CNTRL;E2F2;DYNC1H1;GINS2;CEP135;NUP133;TUBB;RPA2;HSPA2;CDC25B;RBX1;CENPF;POLA2;PSMA4;PSME1;ANAPC5;KIF2C;TP53;ITGB3BP
Non-coding RNA metabolism	5/50	0.0670692	0.522195	2.43094	6.56847	NUP205;NUP133;NUP62;TPR;SNUPN
Platelet homeostasis	7/82	0.0680741	0.522195	2.04346	5.49111	KCNMB1;GNB1;ITPR1;ORAI1;PDE5A;ITPR3;PDE6A
Disease	38/674	0.0681258	0.522195	1.31653	3.53673	SNAP25;GTF2A1;PCSK1;NUP205;CALCA;YWHAB;GOSR2;ITPR1;ADCY3;ITPR3;ADCY1;ADCY6;FGF4;FGF7;MKNK1;TPR;CNTRL;NUP62;MYO18A;AP1S1;RPL13;FYN;SEC31A;SNCA;CPSF6;TBP;HSPA5;NUP133;PLA2G4B;PRKCA;AP2B1;RBX1;PSMA4;DDIT3;FGF18;ERCC2;PSME1;TAF1
Abacavir transport and metabolism	2/10	0.0684222	0.522195	5.46143	14.6479	GUK1;SLC22A2
Activation of Src by protein tyrosine phosphatase alpha	2/10	0.0684222	0.522195	5.46143	14.6479	PRKCA;CDC25B
Activation of calcium-permeable kainate receptor	2/10	0.0684222	0.522195	5.46143	14.6479	GRIK1;NCALD
Bile acid and bile salt biosynthesis via 24-hydroxycholesterol	2/10	0.0684222	0.522195	5.46143	14.6479	AMACR;CYP8B1
Bile acids and bile salt biosynthesis	2/10	0.0684222	0.522195	5.46143	14.6479	AMACR;CYP8B1
NODAL signaling regulation	2/10	0.0684222	0.522195	5.46143	14.6479	ACVR1B;ACVR2A
Rheb GTPase activity by AMPK regulation	2/10	0.0684222	0.522195	5.46143	14.6479	PRKAA1;PRKAB1
TRAF6-mediated IRF7 activation in TLR7/8 or 9 signaling	2/10	0.0684222	0.522195	5.46143	14.6479	IRAK1;TLR7
Epstein-Barr virus LMP1 signaling	3/22	0.0696329	0.524154	3.45128	9.19601	IRAK1;TNF;NFKB2
Glycosaminoglycan biosynthesis: chondroitin sulfate	3/22	0.0696329	0.524154	3.45128	9.19601	B3GAT2;DSE;B3GALT6
Transport to the Golgi and subsequent modification	4/36	0.0713652	0.532404	2.73353	7.21638	MGAT4B;SEC24C;B4GALT4;SEC31A
Malaria	5/51	0.0718069	0.532404	2.37797	6.26303	CD40;GYPC;HGF;HBD;TNF
DNA replication	14/207	0.0721821	0.532404	1.59115	4.18243	GINS2;PCNA;NUP133;ZWILCH;RPA2;BUB1B;ORC4;POLA2;CENPF;PSMA4;PSME1;E2F2;KIF2C;ITGB3BP
G1 to S cell cycle control	6/67	0.0729767	0.534676	2.15264	5.63479	ORC4;POLA2;PCNA;E2F2;RPA2;TP53
Heparan sulfate/heparin glycosaminoglycan (HS-GAG) metabolism	5/52	0.076723	0.534771	2.32725	5.97534	GLCE;B3GAT2;B3GALT6;HS3ST4;HS6ST2
Taste transduction	5/52	0.076723	0.534771	2.32725	5.97534	SCNN1A;GNB1;TAS2R14;ITPR3;ADCY6
Collagen binding in corneal epithelia mediated by Erk and PI-3 Kinase	3/23	0.0775713	0.534771	3.27855	8.3818	MLC1;FYN;RHOA
FGFR ligand binding and activation	3/23	0.0775713	0.534771	3.27855	8.3818	FGF7;FGF18;FGF4
Mismatch repair	3/23	0.0775713	0.534771	3.27855	8.3818	PCNA;RPA2;MLH3
Modulation of interferon signaling by chaperones	3/23	0.0775713	0.534771	3.27855	8.3818	WT1;TNF;TP53
Signaling events mediated by PRL	3/23	0.0775713	0.534771	3.27855	8.3818	PTP4A3;TUBA1B;RHOA
Signaling by NOTCH	9/119	0.0780527	0.534771	1.79218	4.57071	HEYL;KAT2A;JAG1;HDAC3;HEY2;CNTN1;TP53;MAMLD1;RBX1
NOD signaling pathway	7/85	0.0792196	0.534771	1.96456	4.9812	PYCARD;MAPK11;ACAP1;IRAK1;RIPK2;CASP2;TNF
Signaling by ERBB2	8/102	0.0792304	0.534771	1.86362	4.72502	YWHAB;ITPR1;ADCY3;PRKCA;ITPR3;FYN;ADCY1;ADCY6
Bone mineralization regulation	2/11	0.0812619	0.534771	4.85435	12.1848	COL4A6;COL4A5
CDC6 association with the ORC-origin complex	2/11	0.0812619	0.534771	4.85435	12.1848	ORC4;E2F2
Down syndrome cell adhesion molecule (DSCAM) interactions	2/11	0.0812619	0.534771	4.85435	12.1848	MAPK11;DSCAML1
Norepinephrine neurotransmitter release cycle	2/11	0.0812619	0.534771	4.85435	12.1848	SNAP25;SLC22A2
Reversal of insulin resistance by leptin	2/11	0.0812619	0.534771	4.85435	12.1848	PRKAA1;PRKAB1
Telomerase protein component gene hTERT transcriptional regulation	2/11	0.0812619	0.534771	4.85435	12.1848	WT1;TP53
Vitamin C in the brain	2/11	0.0812619	0.534771	4.85435	12.1848	COL4A6;COL4A5
MHC class II antigen presentation	8/103	0.082786	0.534824	1.84391	4.5941	DYNC1H1;KIF5C;KIF3A;AP1S1;KIF2C;AP2B1;SEC24C;SEC31A
Signaling of hepatocyte growth factor receptor	4/38	0.083617	0.534824	2.57247	6.3836	MAP4K1;ACTA1;HGF;RASA1
Transport of mature mRNAs derived from intronless transcripts	4/38	0.083617	0.534824	2.57247	6.3836	NUP205;NUP133;NUP62;TPR
p38 alpha/beta MAPK downstream pathway	4/38	0.083617	0.534824	2.57247	6.3836	MAPK11;MKNK1;DDIT3;TP53
Wnt signaling pathway	15/231	0.0844031	0.534824	1.52319	3.76555	TCF7L1;PRKCH;FZD2;TBP;FBXW11;PRKCA;RHOA;DKK3;SOX30;RBX1;PORCN;PLCB4;DACT3;TP53;DACT1
Notch signaling pathway	9/121	0.084591	0.534824	1.75999	4.34704	PTCRA;HEYL;KAT2A;JAG1;HEY2;CNTN1;DTX3;GATA3;TNF
SREBP signaling	3/24	0.0858853	0.534824	3.12226	7.66435	SEC23B;SEC24C;SEC31A
TAK1 activates NF-kappaB by phosphorylation and activation of IKK complex	3/24	0.0858853	0.534824	3.12226	7.66435	IRAK1;RIPK2;NFKB2
Antiviral mechanism by interferon-stimulated genes	6/70	0.0861364	0.534824	2.05141	5.0297	NUP205;NUP133;NUP62;TPR;TRIM25;FLNB
Long-term potentiation	6/70	0.0861364	0.534824	2.05141	5.0297	PLCB4;RPS6KA2;ITPR1;PRKCA;ITPR3;ADCY1
Aurora B signaling	4/39	0.0901038	0.547526	2.49884	6.01419	RASA1;STMN1;KIF2C;RHOA
FRS2-mediated cascade	4/39	0.0901038	0.547526	2.49884	6.01419	FGF7;YWHAB;FGF18;FGF4
HIV-1 transcription initiation	4/39	0.0901038	0.547526	2.49884	6.01419	GTF2A1;TBP;ERCC2;TAF1
Fibroblast growth factor receptor pathway	8/105	0.0901749	0.547526	1.8057	4.34453	MAPK11;FGF7;PRKCH;RPS6KA2;FGF18;PRKCA;FGF12;FGF4
Interferon alpha signaling regulation	3/25	0.0945584	0.5488	2.98019	7.02888	IFNA4;IFNA17;IFNA10
PIP2 hydrolysis	3/25	0.0945584	0.5488	2.98019	7.02888	PRKCH;ITPR1;ITPR3
Activation of chaperones by ATF6 alpha	2/12	0.0947673	0.5488	4.36869	10.2941	HSPA5;DDIT3
Dopamine neurotransmitter release cycle	2/12	0.0947673	0.5488	4.36869	10.2941	SNAP25;SYN3
FGFR3 ligand binding and activation	2/12	0.0947673	0.5488	4.36869	10.2941	FGF18;FGF4
Phospholipase C epsilon pathway	2/12	0.0947673	0.5488	4.36869	10.2941	RAP2B;ADCY1
Platelet endothelial cell adhesion molecule 1 (PECAM1) interactions	2/12	0.0947673	0.5488	4.36869	10.2941	FYN;ITGAV
Rab GTPases mark targets in the endocytotic machinery	2/12	0.0947673	0.5488	4.36869	10.2941	ACTA1;RAB8A
Toll-like receptor signaling pathway regulation	10/142	0.094879	0.5488	1.65941	3.90817	CXCL10;IFNA4;MAPK11;CD40;IRAK1;IFNA17;TLR7;TNF;IFNA10;NFKB2
Negative regulation of FGFR signaling	4/40	0.0968238	0.557117	2.4293	5.67208	FGF7;MKNK1;FGF18;FGF4
Cytosolic DNA-sensing pathway	5/56	0.0981355	0.561723	2.14427	4.97772	PYCARD;IFNA4;CXCL10;IFNA17;IFNA10
G alpha (i) signaling events	13/199	0.099281	0.565336	1.53189	3.53836	GABBR1;CCL21;ADCY3;ADCY1;ADCY6;CXCL10;GNB1;RHO;ADORA1;NMUR1;S1PR3;CCL19;RGS9
Thymic stromal lymphopoietin (TSLP) pathway	7/90	0.100003	0.56651	1.84573	4.2499	CXCL10;CD40;PSMA4;JAG1;SLC44A1;PSME1;CCL19
CARM1 and regulation of the estrogen receptor	3/26	0.103573	0.576774	2.85046	6.46336	GTF2A1;HDAC3;TBP
Steroid biosynthesis	3/26	0.103573	0.576774	2.85046	6.46336	HSD17B2;MSMO1;DHCR7
FOXM1 transcription factor network	4/41	0.103771	0.576774	2.36352	5.35471	CCNB2;CENPF;ETV5;CDC25B
Pathogenic Escherichia coli infection	5/57	0.103914	0.576774	2.10292	4.76143	TUBA1B;TUBB;PRKCA;FYN;RHOA
Integrins in angiogenesis	6/74	0.105566	0.582999	1.93034	4.34021	COL4A6;PI4KA;ILK;COL4A5;ITGAV;RHOA
Angiotensin-converting enzyme 2 regulation of heart function	2/13	0.108855	0.583572	3.97132	8.80734	COL4A6;COL4A5
Cytosolic sulfonation of small molecules	2/13	0.108855	0.583572	3.97132	8.80734	SULT1A1;SULT1A2
FGFR4 ligand binding and activation	2/13	0.108855	0.583572	3.97132	8.80734	FGF18;FGF4
Lck and Fyn tyrosine kinases in initiation of T cell receptor activation	2/13	0.108855	0.583572	3.97132	8.80734	FYN;CD3D
NICD trafficking to the nucleus	2/13	0.108855	0.583572	3.97132	8.80734	KAT2A;MAMLD1
Sulfur metabolism	2/13	0.108855	0.583572	3.97132	8.80734	SULT1A1;SULT1A2
Immune system signaling by interferons, interleukins, prolactin, and growth hormones	17/280	0.110564	0.587732	1.41754	3.12166	IFNA4;NUP205;NUP133;RIPK2;YWHAB;HGF;IFNA17;RBX1;NFKB2;IRAK1;TPR;NUP62;TRIM25;FLNB;FYN;IFNA10;IP6K2
Aldosterone-regulated sodium reabsorption	4/42	0.110939	0.587732	2.3012	5.05983	HSD11B2;FXYD2;SCNN1A;PRKCA
Bile acid and bile salt metabolism	3/27	0.112912	0.587732	2.73155	5.95792	AMACR;FABP6;CYP8B1
Cell cycle: G2/M checkpoint	3/27	0.112912	0.587732	2.73155	5.95792	PI4KA;TP53;CDC25B
Kinesins	3/27	0.112912	0.587732	2.73155	5.95792	KIF3A;KIF5C;KIF2C
Mammalian calpain regulation of cell motility	3/27	0.112912	0.587732	2.73155	5.95792	CAST;ACTA1;MLC1
Protein processing in the endoplasmic reticulum	11/166	0.113737	0.587732	1.55441	3.37908	HSPA8;HSPA5;DAD1;DDIT3;AMFR;STT3A;HSPA2;SEC23B;SEC24C;RBX1;SEC31A
PDGFB signaling pathway	9/129	0.11391	0.587732	1.64196	3.56692	CYFIP2;PDGFRB;ACTA2;YWHAB;RASA1;PRKCA;ITGAV;FYN;RHOA
Signaling by EGFR in cancer	8/111	0.114537	0.588208	1.69998	3.68361	YWHAB;ITPR1;ADCY3;PRKCA;ITPR3;ADCY1;AP2B1;ADCY6
Insulin secretion regulation by glucagon-like peptide-1	4/43	0.11832	0.602008	2.24208	4.7854	GNB1;ITPR1;ITPR3;ADCY6
Voltage-gated potassium channels	4/43	0.11832	0.602008	2.24208	4.7854	KCNG1;KCNH8;KCNA5;KCNH1
S phase	8/112	0.118912	0.602231	1.68354	3.58489	ORC4;GINS2;POLA2;PSMA4;PCNA;PSME1;RPA2;CDC25B
Transcriptional regulation of white adipocyte differentiation	6/77	0.1215	0.605674	1.84848	3.8963	MED12;HDAC3;NR2F2;TNF;MED29;MED17
Extension of telomeres	3/28	0.122556	0.605674	2.62215	5.50438	POLA2;PCNA;RPA2
Nef in HIV-1 replication and disease pathogenesis	3/28	0.122556	0.605674	2.62215	5.50438	AP1S1;FYN;AP2B1
Recycling pathway of cell adhesion molecule L1	3/28	0.122556	0.605674	2.62215	5.50438	DPYSL2;RPS6KA2;AP2B1
Leading strand biosynthesis	2/14	0.12345	0.605674	3.64019	7.615	POLA2;PCNA
Osteoblast signaling	2/14	0.12345	0.605674	3.64019	7.615	PDGFRB;ITGAV
Platelet amyloid precursor protein pathway	2/14	0.12345	0.605674	3.64019	7.615	COL4A6;COL4A5
Gastrin pathway	4/44	0.125908	0.61227	2.18591	4.52965	CALCA;JAG1;HGF;ITGAV
Interactions of HIV Vpr protein with host cellular proteins	4/44	0.125908	0.61227	2.18591	4.52965	NUP205;NUP133;NUP62;TPR
Phosphatidylinositol signaling system	6/78	0.127061	0.615156	1.82271	3.76041	CDS1;PLCB4;ITPR1;PI4KA;PRKCA;ITPR3
Cell adhesion molecules (CAMs)	9/133	0.130429	0.618611	1.58866	3.23599	CNTNAP2;CLDN10;CD40;CNTNAP1;CDH3;NRXN1;CNTN1;NRXN2;ITGAV
Tight junction	9/133	0.130429	0.618611	1.58866	3.23599	CLDN10;PRKCH;SYMPK;MYH9;PRKCA;MYH11;MYL9;TJAP1;RHOA
Amine compound SLC transporters	3/29	0.132488	0.618611	2.52117	5.09594	SLC44A1;SLC22A2;SLC6A1
Homologous recombination	3/29	0.132488	0.618611	2.52117	5.09594	RAD51B;BLM;RPA2
Inhibition of insulin secretion by adrenaline/noradrenaline	3/29	0.132488	0.618611	2.52117	5.09594	CACNB2;GNB1;ADCY6
Thyroid cancer	3/29	0.132488	0.618611	2.52117	5.09594	TCF7L1;TPR;TP53
Fas signaling pathway	8/115	0.132559	0.618611	1.63608	3.30609	ACTA2;ACTA1;MAPK11;RIPK2;CD47;TP53;NFKB2;PLEC
Fc epsilon receptor I signaling pathway	6/79	0.132744	0.618611	1.79765	3.63006	MAPK11;PLA2G4B;JMJD7-PLA2G4B;PRKCA;FYN;TNF
Amino sugar and nucleotide sugar metabolism	4/45	0.133695	0.618611	2.13248	4.29097	GMPPB;NAGK;GMPPA;GALK1
Integrin-linked kinase signaling	4/45	0.133695	0.618611	2.13248	4.29097	PPP1R14B;NACA;ILK;MYL9
Signaling events mediated by focal adhesion kinase	5/62	0.135202	0.618611	1.91795	3.8378	ACTA1;RASA1;ITGAV;FYN;RHOA
Association of licensing factors with the pre-replicative complex	2/15	0.138478	0.618611	3.36	6.64286	ORC4;E2F2
Bile acid and bile salt biosynthesis via 7-alpha-hydroxycholesterol	2/15	0.138478	0.618611	3.36	6.64286	AMACR;CYP8B1
Cyclin A/B1-associated events during G2/M transition	2/15	0.138478	0.618611	3.36	6.64286	CCNB2;CDC25B
Cytochrome P450 metabolism of endogenous sterols	2/15	0.138478	0.618611	3.36	6.64286	CYP19A1;CYP8B1
Eicosanoid ligand-binding G-protein coupled receptors	2/15	0.138478	0.618611	3.36	6.64286	PTGFR;TBXA2R
Mechanisms of transcriptional repression by DNA methylation	2/15	0.138478	0.618611	3.36	6.64286	MBD1;CHD4
Mu-calpain pathway	2/15	0.138478	0.618611	3.36	6.64286	ACTA1;RHOA
Stress induction of HSP regulation	2/15	0.138478	0.618611	3.36	6.64286	ACTA1;TNF
Polo-like kinase 1 (PLK1) pathway	4/46	0.141673	0.618611	2.0816	4.06793	FBXW11;BUB1B;RHOA;CDC25B
Cell cycle checkpoints	8/117	0.142082	0.618611	1.6059	3.13367	CCNB2;ORC4;PSMA4;PSME1;BUB1B;RPA2;ANAPC5;TP53
Activation of kainate receptors upon glutamate binding	3/30	0.142688	0.618611	2.42766	4.72688	GNB1;GRIK1;NCALD
Activation of the pre-replicative complex	3/30	0.142688	0.618611	2.42766	4.72688	ORC4;POLA2;RPA2
Biosynthesis of the N-glycan precursor (dolichol lipid-linked oligosaccharide, LLO) and transfer to a nascent protein	3/30	0.142688	0.618611	2.42766	4.72688	GMPPB;ALG8;GMPPA
Heparan sulfate/heparin glycosaminoglycan (HS-GAG) biosynthesis	3/30	0.142688	0.618611	2.42766	4.72688	GLCE;HS3ST4;HS6ST2
MicroRNAs in muscle cell differentiation	3/30	0.142688	0.618611	2.42766	4.72688	PRKCH;PRKCA;EZH2
HIV life cycle	8/118	0.146967	0.618611	1.59121	3.05122	GTF2A1;NUP205;TBP;NUP133;TPR;NUP62;ERCC2;TAF1
LKB1 signaling events	4/47	0.149834	0.618611	2.03309	3.85925	PRKAA1;YWHAB;PRKAB1;TP53
Alpha-V beta-3 integrin/OPN pathway	3/31	0.153139	0.618611	2.34084	4.39237	ILK;ITGAV;RHOA
Inwardly rectifying potassium channels	3/31	0.153139	0.618611	2.34084	4.39237	GABBR1;GNB1;KCNJ16
Ras family activation regulation	3/31	0.153139	0.618611	2.34084	4.39237	RASA4;RASA1;PRKCA
Stathmin and breast cancer resistance to antimicrotubule agents	3/31	0.153139	0.618611	2.34084	4.39237	HSPA5;STMN1;CD3D
Post-translational protein modification	12/196	0.153691	0.618611	1.42792	2.67422	GMPPB;ALG8;PIGU;MUC1;DAD1;GMPPA;MGAT4B;STT3A;SEC24C;GALNT10;B4GALT4;SEC31A
Acetylation and deacetylation of RelA in the nucleus	2/16	0.153875	0.618611	3.11984	5.83913	HDAC3;TNF
CRMPs in Sema3A signaling	2/16	0.153875	0.618611	3.11984	5.83913	DPYSL2;FYN
Cell-extracellular matrix interactions	2/16	0.153875	0.618611	3.11984	5.83913	FBLIM1;ILK
Gap-filling DNA repair biosynthesis and ligation in global genomic nucleotide excision repair	2/16	0.153875	0.618611	3.11984	5.83913	PCNA;RPA2
Glyoxylate and dicarboxylate metabolism	2/16	0.153875	0.618611	3.11984	5.83913	CS;MTHFD1L
JNK (c-Jun kinases) phosphorylation and activation mediated by activated human TAK1	2/16	0.153875	0.618611	3.11984	5.83913	IRAK1;RIPK2
KIT signaling regulation	2/16	0.153875	0.618611	3.11984	5.83913	PRKCA;FYN
N-glycan precursor substrate biosynthesis	2/16	0.153875	0.618611	3.11984	5.83913	GMPPB;GMPPA
Primary bile acid biosynthesis	2/16	0.153875	0.618611	3.11984	5.83913	AMACR;CYP8B1
Rb tumor suppressor/checkpoint signaling in response to DNA damage	2/16	0.153875	0.618611	3.11984	5.83913	TP53;CDC25B
SREBF and miR-33 in cholesterol and lipid homeostasis	2/16	0.153875	0.618611	3.11984	5.83913	PRKAA1;SIRT6
Selenium metabolism and selenoproteins	2/16	0.153875	0.618611	3.11984	5.83913	TRNAU1AP;SCLY
p75 neurotrophin receptor signaling via NF-kB	2/16	0.153875	0.618611	3.11984	5.83913	IRAK1;RIPK2
Melanogenesis	7/101	0.15497	0.618611	1.6288	3.03693	TCF7L1;FZD2;PLCB4;ADCY3;PRKCA;ADCY1;ADCY6
LPA receptor mediated events	5/65	0.155755	0.618611	1.82177	3.38753	GNB1;ADCY3;ADCY1;RHOA;ADCY6
Generic transcription pathway	21/377	0.156433	0.618611	1.29327	2.39919	ZNF287;ZNF133;ZNF540;ZNF141;ZNF250;ZNF10;MED17;MED12;KAT2A;ZNF606;ZNF419;ZNF616;ZNF30;ZNF613;ZNF337;ZNF248;ZNF585B;ZNF114;MAMLD1;ZNF333;ZNF585A
G alpha s pathway	8/120	0.156981	0.618611	1.56263	2.89342	MAPK11;PDE4D;ADCY3;PDE5A;ADCY1;PDE6A;RGS9;ADCY6
ATM pathway	4/48	0.158171	0.618611	1.98677	3.66377	MDC1;BLM;YWHAB;TP53
Activation of chaperones by IRE1 alpha	4/48	0.158171	0.618611	1.98677	3.66377	HSPA5;GOSR2;PLA2G4B;SEC31A
Energy metabolism	4/48	0.158171	0.618611	1.98677	3.66377	PRKAA1;NRF1;TFB1M;PRKAB1
N-glycan biosynthesis	4/48	0.158171	0.618611	1.98677	3.66377	ALG8;DAD1;MGAT4B;STT3A
Retinoblastoma protein regulation	5/66	0.162877	0.634758	1.79181	3.25171	MAPK11;TBP;HDAC3;E2F2;TAF1
Syndecan 4 pathway	3/32	0.163822	0.636185	2.26	4.08829	GIPC1;PRKCA;RHOA
Activation of BH3-only proteins	2/17	0.16958	0.638121	2.9117	5.16661	YWHAB;TP53
Cadmium-induced DNA biosynthesis and proliferation in macrophages	2/17	0.16958	0.638121	2.9117	5.16661	PRKCA;TNF
Dendritic cells in regulating TH1 and TH2 development	2/17	0.16958	0.638121	2.9117	5.16661	CD40;TLR7
Energy-dependent regulation of mTOR by LKB1-AMPK	2/17	0.16958	0.638121	2.9117	5.16661	PRKAA1;PRKAB1
Post-chaperonin tubulin folding pathway	2/17	0.16958	0.638121	2.9117	5.16661	TUBA1B;TBCD
Sulfation biotransformation reaction	2/17	0.16958	0.638121	2.9117	5.16661	SULT1A1;SULT1A2
Synaptic proteins at the synaptic junction	2/17	0.16958	0.638121	2.9117	5.16661	ACTA1;GUK1
Unblocking of NMDA receptor, glutamate binding and activation	2/17	0.16958	0.638121	2.9117	5.16661	GRIA3;GRIA4
G alpha 13 pathway	5/67	0.170127	0.638121	1.76282	3.12232	PRKCH;TBXA2R;PRKCA;RHOA;NFKB2
T cell receptor signaling in naive CD4+ T cells	5/67	0.170127	0.638121	1.76282	3.12232	MAP4K1;ORAI1;PRKCA;FYN;CD3D
E2F-mediated regulation of DNA replication	3/33	0.174718	0.642192	2.18455	3.81113	ORC4;POLA2;PCNA
Global genomic nucleotide excision repair (GG-NER)	3/33	0.174718	0.642192	2.18455	3.81113	PCNA;ERCC2;RPA2
Aquaporin-mediated transport	4/50	0.175335	0.642192	1.90019	3.30834	GNB1;ADCY3;ADCY1;ADCY6
mRNA stability regulation by proteins that bind AU-rich elements	6/86	0.175693	0.642192	1.63975	2.85156	HSPA8;MAPK11;PSMA4;YWHAB;PSME1;PRKCA
p75 neurotrophin receptor-mediated signaling	8/124	0.177936	0.642192	1.50843	2.60406	LINGO1;HDAC3;IRAK1;RIPK2;CASP2;TP53;RHOA;ITGB3BP
Mitotic G2-G2/M phases	6/87	0.182248	0.642192	1.61942	2.75689	CCNB2;DYNC1H1;CEP135;TUBB;CNTRL;CDC25B
Type I interferon (interferon-alpha/beta) pathway	4/51	0.184146	0.642192	1.85967	3.1466	PTPRD;PTPRR;PTP4A3;PTPRB
Pathways in cancer	18/325	0.184785	0.642192	1.28431	2.16863	PDGFRB;TCF7L1;FZD2;HGF;PRKCA;RHOA;FGF4;RBX1;NFKB2;RASSF1;FGF7;TPR;FGF18;COL4A6;E2F2;ITGAV;TP53;FGF12
Activated AMPK stimulation of fatty-acid oxidation in muscle	2/18	0.185535	0.642192	2.72957	4.598	PRKAA1;PRKAB1
Nucleotide di- and triphosphate biosynthesis and interconversion	2/18	0.185535	0.642192	2.72957	4.598	GUK1;CTPS2
Sodium/chloride-dependent neurotransmitter transporters	2/18	0.185535	0.642192	2.72957	4.598	SLC22A2;SLC6A1
Transcriptional activity regulation by PML	2/18	0.185535	0.642192	2.72957	4.598	TNF;TP53
EGF receptor transactivation by GPCRs in cardiac hypertrophy	3/34	0.185809	0.642192	2.11397	3.55789	GNB1;PRKCA;RHOA
Ephrin receptor A forward pathway	3/34	0.185809	0.642192	2.11397	3.55789	FYN;EPHA1;RHOA
Interleukin-7 interactions in immune response	3/34	0.185809	0.642192	2.11397	3.55789	CDK18;CXCL10;CCL19
TOR signaling	3/34	0.185809	0.642192	2.11397	3.55789	PRKAA1;PRKCA;PRKAB1
DNA replication pre-Initiation	6/88	0.188898	0.642192	1.59959	2.6658	ORC4;POLA2;PSMA4;PSME1;E2F2;RPA2
Platelet activation, signaling and aggregation	12/205	0.190501	0.642192	1.36069	2.25615	PRKCH;HSPA5;WDR1;MMRN1;TBXA2R;HGF;GNB1;ITPR1;PRKCA;ITPR3;FYN;RHOA
Signaling events mediated by HDAC class I	5/70	0.192595	0.642192	1.68119	2.7692	HDAC3;NUP62;CHD4;SIRT6;TNF
Autoimmune thyroid disease	4/52	0.193098	0.642192	1.82083	2.99446	IFNA4;CD40;IFNA17;IFNA10
Gastrin-CREB signaling pathway via PKC and MAPK	12/206	0.194826	0.642192	1.3536	2.21402	PTGFR;PRKCH;PLCB4;TBXA2R;YWHAB;RPS6KA2;GNB1;ITPR1;PRKCA;ITPR3;NMUR1;HCRTR2
Ether lipid metabolism	3/35	0.197078	0.642192	2.0478	3.32595	PLA2G4B;JMJD7-PLA2G4B;PAFAH1B3
Integrated cancer pathway	3/35	0.197078	0.642192	2.0478	3.32595	BLM;TP53;CDC25B
MEF2D role in T cell apoptosis	3/35	0.197078	0.642192	2.0478	3.32595	FYN;PRKCA;CD3D
Primary immunodeficiency	3/35	0.197078	0.642192	2.0478	3.32595	CD40;RFX5;CD3D
Signal transduction by L1	3/35	0.197078	0.642192	2.0478	3.32595	RPS6KA2;ITGAV;AP2B1
ATM-mediated phosphorylation of repair proteins	1/5	0.200865	0.642192	5.45634	8.7581	MDC1
Abacavir metabolism	1/5	0.200865	0.642192	5.45634	8.7581	GUK1
Abacavir transmembrane transport	1/5	0.200865	0.642192	5.45634	8.7581	SLC22A2
Activation of NOXA and translocation to mitochondria	1/5	0.200865	0.642192	5.45634	8.7581	TP53
Axonal growth stimulation	1/5	0.200865	0.642192	5.45634	8.7581	RHOA
Blockade of neurotransmitter release by botulinum toxin	1/5	0.200865	0.642192	5.45634	8.7581	SNAP25
Disinhibition of SNARE formation	1/5	0.200865	0.642192	5.45634	8.7581	PRKCA
Flap intermediate removal from the telomere lagging strand (C-strand)	1/5	0.200865	0.642192	5.45634	8.7581	RPA2
Folate-alcohol and cancer pathway	1/5	0.200865	0.642192	5.45634	8.7581	MTHFR
Gene expression regulation in endocrine-committed (NEUROG3+) progenitor cells	1/5	0.200865	0.642192	5.45634	8.7581	NKX2-2
Heme degradation	1/5	0.200865	0.642192	5.45634	8.7581	HMOX2
Ion channel and phorbal esters signaling pathway	1/5	0.200865	0.642192	5.45634	8.7581	PRKCA
Nifedipine activity	1/5	0.200865	0.642192	5.45634	8.7581	PCNA
Phospholipase C delta-1 interactions in phospholipid-associated cell signaling	1/5	0.200865	0.642192	5.45634	8.7581	PRKCA
Polo-like kinase 3 (PLK3) pathway	1/5	0.200865	0.642192	5.45634	8.7581	TP53
Sodium-coupled phosphate cotransporters	1/5	0.200865	0.642192	5.45634	8.7581	SLC34A1
Alpha-linolenic acid metabolism	2/19	0.201689	0.642192	2.56887	4.11284	PLA2G4B;JMJD7-PLA2G4B
Class C GPCRs (metabotropic glutamate and pheromone receptors)	2/19	0.201689	0.642192	2.56887	4.11284	GRM2;GABBR1
ER-associated degradation (ERAD) pathway	2/19	0.201689	0.642192	2.56887	4.11284	SAE1;RBX1
Hypoxic and oxygen homeostasis regulation of HIF-1-alpha	2/19	0.201689	0.642192	2.56887	4.11284	TP53;RBX1
Inhibition of T cell receptor signaling by activated Csk	2/19	0.201689	0.642192	2.56887	4.11284	ADCY1;CD3D
MAL role in Rho-mediated activation of SRF	2/19	0.201689	0.642192	2.56887	4.11284	ACTA1;RHOA
Mitochondrial gene expression	2/19	0.201689	0.642192	2.56887	4.11284	NRF1;TFB1M
Resolution of abasic sites (AP sites)	2/19	0.201689	0.642192	2.56887	4.11284	PCNA;APEX1
Signaling by NODAL	2/19	0.201689	0.642192	2.56887	4.11284	ACVR1B;ACVR2A
Signaling by interleukins	7/109	0.202003	0.642192	1.50042	2.39987	IRAK1;YWHAB;RIPK2;HGF;FYN;RBX1;NFKB2
Thrombin signaling through protease-activated receptors	4/53	0.202182	0.642192	1.78358	2.8512	GNB1;PRKCA;ADCY1;RHOA
Interferon signaling	10/168	0.203631	0.644928	1.38445	2.20328	IFNA4;NUP205;NUP133;IFNA17;TPR;NUP62;TRIM25;FLNB;IFNA10;IP6K2
Oncostatin M	17/311	0.207607	0.655632	1.26599	1.99028	ABCC2;CCL21;HSPA5;TNNC1;HGF;ACSL5;HTR3A;AMPD3;MLLT11;HSD11B2;PLCB4;EXOSC10;CDH3;HSD17B2;ITGAV;TP53;EPHB3
Glycosaminoglycan metabolism	7/110	0.208239	0.655744	1.48577	2.33128	GLCE;B3GAT2;DSE;B3GALT6;HS3ST4;HS6ST2;B4GALT4
Non-small cell lung cancer	4/54	0.21139	0.663765	1.74781	2.71619	RASSF1;E2F2;PRKCA;TP53
Epidermal growth factor receptor (EGFR) pathway	7/111	0.214546	0.665708	1.47141	2.26484	ACTA2;ACTA1;MAPK11;PRKCH;RPS6KA2;PRKCA;RHOA
Myc repressed pathway	5/73	0.216035	0.665708	1.60677	2.46207	PDGFRB;TMEFF2;TBP;HDAC3;DDIT3
Acute myocardial infarction	2/20	0.217994	0.665708	2.42603	3.69555	COL4A6;COL4A5
Apoptotic signaling in response to DNA damage	2/20	0.217994	0.665708	2.42603	3.69555	PRKCA;TP53
Dual incision reaction in GG-NER	2/20	0.217994	0.665708	2.42603	3.69555	ERCC2;RPA2
GATA3-mediated activation of Th2 cytokine expression	2/20	0.217994	0.665708	2.42603	3.69555	ADCY1;GATA3
Hypertrophy pathway	2/20	0.217994	0.665708	2.42603	3.69555	WDR1;IFRD1
N-glycan antennae elongation in the medial/trans-Golgi	2/20	0.217994	0.665708	2.42603	3.69555	MGAT4B;B4GALT4
Sprouty regulation of tyrosine kinase signals	2/20	0.217994	0.665708	2.42603	3.69555	PTPRB;RASA1
Calcineurin-dependent NFAT signaling role in lymphocytes	4/55	0.220713	0.665708	1.71345	2.58884	PRKCH;YWHAB;RCAN2;PRKCA
T cell receptor signaling in naive CD8+ T cells	4/55	0.220713	0.665708	1.71345	2.58884	ORAI1;PRKCA;FYN;CD3D
Transport of mature transcript to cytoplasm	4/55	0.220713	0.665708	1.71345	2.58884	NUP205;NUP133;NUP62;TPR
EGFR1 pathway	9/152	0.224017	0.665708	1.3762	2.05885	NOP56;HSD11B2;FGF7;NUP205;HGF;TUBB;BUB1B;ZNF10;ID3
mTOR signaling pathway	7/113	0.227363	0.665708	1.44349	2.13811	PRKAA1;FBXW11;YWHAB;RPS6KA2;MKNK1;PRKCA;RHOA
Membrane trafficking	8/133	0.229135	0.665708	1.39916	2.06159	HSPA8;GJC2;AP4E1;AP1S1;SEC24C;SNX5;COPZ1;SEC31A
L1CAM interactions	6/94	0.230616	0.665708	1.49006	2.18592	CNTNAP1;DPYSL2;RPS6KA2;CNTN1;ITGAV;AP2B1
Glycolysis and gluconeogenesis	5/75	0.232133	0.665708	1.5607	2.27932	ALDH3A1;AKR1A1;ENO2;ACSS1;ENO3
Metapathway biotransformation	10/174	0.23425	0.665708	1.33338	1.93522	SULT1A1;GLYATL1;NAT1;AKR1A1;CYP19A1;CYP8B1;HS3ST4;HS6ST2;GAL3ST4;SULT1A2
E-cadherin keratinocyte pathway	2/21	0.234405	0.665708	2.29823	3.33404	FYN;RHOA
Inactivation of APC/C via direct inhibition of the APC/C complex	2/21	0.234405	0.665708	2.29823	3.33404	BUB1B;ANAPC5
Mitochondrial tRNA aminoacylation	2/21	0.234405	0.665708	2.29823	3.33404	MARS2;EARS2
PKC-catalyzed phosphorylation of inhibitory phosphoprotein of myosin phosphatase	2/21	0.234405	0.665708	2.29823	3.33404	GNB1;PRKCA
ADP signalling through P2Y purinoceptor 1	1/6	0.235915	0.665708	4.36484	6.30406	GNB1
Alternative NF-kappaB pathway	1/6	0.235915	0.665708	4.36484	6.30406	NFKB2
Assembly of the ORC complex at the origin of replication	1/6	0.235915	0.665708	4.36484	6.30406	ORC4
Basic mechanisms of SUMOylation	1/6	0.235915	0.665708	4.36484	6.30406	SAE1
Bile acid and bile salt biosynthesis via 27-hydroxycholesterol	1/6	0.235915	0.665708	4.36484	6.30406	CYP8B1
Cell cycle negative regulation by p75 neurotrophin receptor	1/6	0.235915	0.665708	4.36484	6.30406	HDAC3
DNA replication initiation	1/6	0.235915	0.665708	4.36484	6.30406	POLA2
FGFR2b ligand binding and activation	1/6	0.235915	0.665708	4.36484	6.30406	FGF7
MSP/RON receptor signaling pathway	1/6	0.235915	0.665708	4.36484	6.30406	TNF
Molybdenum cofactor biosynthesis	1/6	0.235915	0.665708	4.36484	6.30406	MOCOS
NADE-dependent death signaling	1/6	0.235915	0.665708	4.36484	6.30406	CASP2
NF-kappaB activation	1/6	0.235915	0.665708	4.36484	6.30406	IRAK1
Neurotransmitter clearance in the synaptic cleft	1/6	0.235915	0.665708	4.36484	6.30406	SLC22A2
PDGF genes and receptors	1/6	0.235915	0.665708	4.36484	6.30406	PDGFRB
Pyrimidine biosynthesis	1/6	0.235915	0.665708	4.36484	6.30406	DUT
RSK activation	1/6	0.235915	0.665708	4.36484	6.30406	RPS6KA2
Small interfering RNA (siRNA) biogenesis	1/6	0.235915	0.665708	4.36484	6.30406	TARBP2
Insulin signaling pathway	15/277	0.236239	0.665708	1.2527	1.80754	MAP4K1;SNAP25;PRKAA1;PRKCH;PRKCA;PRKAB1;TNF;RHOA;MAPK11;MYO1C;KIF3A;RPS6KA2;RASA1;MKNK1;GYG1
RIG-I/MDA5-mediated induction of interferon-alpha/beta pathways	5/76	0.240306	0.674917	1.53864	2.19385	IFNA4;IFNA17;TRIM25;IFNA10;NFKB2
Integrin signaling pathway	9/155	0.240735	0.674917	1.34771	1.91922	ACTA2;ACTA1;MAPK11;CAPN10;MLC1;ILK;FYN;RHOA;ITGB3BP
Signaling events regulated by Ret tyrosine kinase	3/39	0.24358	0.679428	1.81989	2.57025	RASA1;PRKCA;RHOA
Tricarboxylic acid (TCA) cycle	3/39	0.24358	0.679428	1.81989	2.57025	CS;IDH3G;SUCLG2
M phase pathway	6/96	0.24513	0.682019	1.45679	2.0482	CENPF;NUP133;ZWILCH;BUB1B;KIF2C;ITGB3BP
Nucleotide excision repair	4/58	0.249284	0.683843	1.61801	2.24767	PCNA;ERCC2;RPA2;RBX1
CCR3 signaling in eosinophils	2/22	0.250883	0.683843	2.1832	3.01886	PRKCA;RHOA
Double-strand break repair	2/22	0.250883	0.683843	2.1832	3.01886	MDC1;RPA2
Nephrin interactions	2/22	0.250883	0.683843	2.1832	3.01886	KIRREL2;FYN
TRAF6 mediated NF-kB activation	2/22	0.250883	0.683843	2.1832	3.01886	TRIM25;NFKB2
Pyruvate metabolism and citric acid (TCA) cycle	3/40	0.255479	0.683843	1.77061	2.4162	CS;IDH3G;SUCLG2
BDNF signaling pathway	14/261	0.25688	0.683843	1.23974	1.68499	HSPA8;IGSF3;HSPA5;WDR1;TUBB;HGF;ICA1;GATA3;JMJD6;CENPF;P4HA2;DDIT3;MYH9;S100A4
RNA degradation	4/59	0.258981	0.683843	1.5885	2.14607	CNOT6;EXOSC10;ENO2;ENO3
Wnt signaling pathway and pluripotency	6/98	0.2599	0.683843	1.42497	1.92009	TCF7L1;PRKCH;FZD2;PRKCA;TP53;RHOA
Unfolded protein response	5/79	0.265266	0.683843	1.47603	1.95872	HSPA5;PLA2G4B;DDIT3;GOSR2;SEC31A
Granule cell survival pathway	6/99	0.267372	0.683843	1.40958	1.8594	PLCB4;ADCY3;KCNK17;ADCY1;ADCY6;CREB5
CREB transcription factor and its extracellular signals	2/23	0.267388	0.683843	2.07913	2.74248	PRKCA;ADCY1
Deadenylation of mRNA	2/23	0.267388	0.683843	2.07913	2.74248	PAN2;CNOT6
Eicosanoid metabolism	2/23	0.267388	0.683843	2.07913	2.74248	PTGFR;TBXA2R
Hypoxia and p53 in the cardiovascular system	2/23	0.267388	0.683843	2.07913	2.74248	TP53;TAF1
Progesterone-initiated oocyte maturation	2/23	0.267388	0.683843	2.07913	2.74248	ACTA1;ADCY1
Th1/Th2 differentiation pathway	2/23	0.267388	0.683843	2.07913	2.74248	CD40;GATA3
Alpha-M beta-2 integrin signaling	3/41	0.267456	0.683843	1.72393	2.27351	FYN;TNF;RHOA
Bioactive peptide-induced signaling pathway	3/41	0.267456	0.683843	1.72393	2.27351	GNB1;FYN;PRKCA
Insulin biosynthesis and processing	3/41	0.267456	0.683843	1.72393	2.27351	PCSK1;SNAP25;NKX2-2
Plasma membrane estrogen receptor signaling	3/41	0.267456	0.683843	1.72393	2.27351	MAPK11;GNB1;RHOA
Tyrosine metabolism	3/41	0.267456	0.683843	1.72393	2.27351	PNMT;ALDH3A1;LCMT1
Selenium pathway	4/60	0.268749	0.683843	1.56006	2.04988	PRDX5;MTHFR;TNF;NFKB2
Activation of PKC through G-protein coupled receptors	1/7	0.26943	0.683843	3.63718	4.76996	PRKCA
Attachment of GPI anchor to uPAR	1/7	0.26943	0.683843	3.63718	4.76996	PIGU
BAD activation and translocation to mitochondria	1/7	0.26943	0.683843	3.63718	4.76996	YWHAB
CREB phosphorylation	1/7	0.26943	0.683843	3.63718	4.76996	RPS6KA2
Caffeine metabolism	1/7	0.26943	0.683843	3.63718	4.76996	NAT1
FGFR3b ligand binding and activation	1/7	0.26943	0.683843	3.63718	4.76996	FGF18
FXR and LXR regulation of cholesterol metabolism	1/7	0.26943	0.683843	3.63718	4.76996	FABP6
Gamma-secretase-mediated ErbB4 signaling pathway	1/7	0.26943	0.683843	3.63718	4.76996	PRKCA
Highly sodium permeable acetylcholine nicotinic receptors	1/7	0.26943	0.683843	3.63718	4.76996	CHRNG
Homologous DNA pairing and strand exchange	1/7	0.26943	0.683843	3.63718	4.76996	RPA2
Interleukin-1 processing	1/7	0.26943	0.683843	3.63718	4.76996	NFKB2
MEK activation	1/7	0.26943	0.683843	3.63718	4.76996	YWHAB
Nef-mediated CD8 downregulation	1/7	0.26943	0.683843	3.63718	4.76996	AP2B1
Ubiquinone and other terpenoid-quinone biosynthesis	1/7	0.26943	0.683843	3.63718	4.76996	COQ3
Zinc efflux and compartmentalization by the SLC30 family	1/7	0.26943	0.683843	3.63718	4.76996	SLC30A3
Immune system	48/998	0.271977	0.688715	1.10762	1.44216	IFNA4;CD40;DEFB105A;NUP205;YWHAB;ITPR1;ICAM4;ITPR3;CD3D;PYCARD;IRAK1;KIF5C;KIF3A;RPS6KA2;NUP62;TPR;TRIM25;AP1S1;CASP2;FLNB;ITGAV;FYN;IP6K2;SEC31A;DYNC1H1;NUP133;HSPA5;RIPK2;FBXW11;IFNA17;DEFA4;HGF;AP2B1;RBX1;NFKB2;TAPBP;MAPK11;PSMA4;PSME1;ASB6;ORAI1;TRIM36;ANAPC5;KIF2C;TLR7;SAE1;SEC24C;IFNA10
Cardiac muscle contraction	5/80	0.273714	0.688822	1.45627	1.88685	CACNB2;TNNC1;TPM2;FXYD2;UQCR11
Clathrin derived vesicle budding	4/61	0.278582	0.688822	1.53261	1.95874	HSPA8;AP4E1;AP1S1;SNX5
HIV genome transcription	4/61	0.278582	0.688822	1.53261	1.95874	GTF2A1;TBP;ERCC2;TAF1
Licensing factor removal from origins	4/61	0.278582	0.688822	1.53261	1.95874	ORC4;PSMA4;PSME1;AZIN1
Bladder cancer	3/42	0.279496	0.688822	1.67963	2.14114	RASSF1;E2F2;TP53
Eukaryotic transcription initiation	3/42	0.279496	0.688822	1.67963	2.14114	TBP;ERCC2;ILK
Urokinase-type plasminogen activator (uPA) and uPAR-mediated signaling	3/42	0.279496	0.688822	1.67963	2.14114	PDGFRB;HGF;ITGAV
Cholesterol biosynthesis	2/24	0.283889	0.688822	1.98452	2.49885	MSMO1;DHCR7
Endogenous Toll-like receptor signaling	2/24	0.283889	0.688822	1.98452	2.49885	IRAK1;RHOA
Lysosome vesicle biogenesis	2/24	0.283889	0.688822	1.98452	2.49885	HSPA8;AP1S1
NF-kappaB signaling pathway	2/24	0.283889	0.688822	1.98452	2.49885	IRAK1;TNF
Circadian rhythm	4/62	0.28847	0.688822	1.5061	1.87233	HDAC3;FBXW11;NPAS2;RBX1
Huntington's disease	10/184	0.288657	0.688822	1.25608	1.5607	DNAH1;TBP;PLCB4;NDUFB7;ITPR1;UQCR11;NRF1;AP2B1;TP53;CREB5
Regular glucocorticoid receptor pathway	5/82	0.290771	0.688822	1.4183	1.7519	MAPK11;SMARCC2;TBP;GATA3;TP53
G2/M checkpoints	3/43	0.291584	0.688822	1.63756	2.01817	CCNB2;ORC4;RPA2
PI3K class IB pathway in neutrophils	3/43	0.291584	0.688822	1.63756	2.01817	PRKCH;PRKCA;RHOA
Porphyrin and chlorophyll metabolism	3/43	0.291584	0.688822	1.63756	2.01817	FTMT;EARS2;HMOX2
Type 1 diabetes mellitus	3/43	0.291584	0.688822	1.63756	2.01817	PTPRN2;ICA1;TNF
Interleukin-5 regulation of apoptosis	8/144	0.297671	0.688822	1.28525	1.55742	IRAK1;WT1;FEZ1;MKNK1;ITPR1;HSPA2;CCL19;NFKB2
Chromosome maintenance	6/103	0.297753	0.688822	1.35117	1.63693	DIDO1;POLA2;PCNA;RPA2;HSPA2;ITGB3BP
Folate metabolism	4/63	0.298406	0.688822	1.4805	1.79037	MTHFR;TNF;TP53;NFKB2
Meiosis	5/83	0.29937	0.688822	1.40004	1.68855	DIDO1;BLM;RPA2;HSPA2;MLH3
Response to elevated platelet cytosolic calcium	5/83	0.29937	0.688822	1.40004	1.68855	WDR1;MMRN1;HSPA5;HGF;PRKCA
T cell signal transduction	5/83	0.29937	0.688822	1.40004	1.68855	MAPK11;PRKCH;PRKCA;CD3D;NFKB2
APC/C- and Cdc20-mediated degradation of Nek2A	2/25	0.300352	0.688822	1.89814	2.28308	BUB1B;ANAPC5
C-Myc pathway	2/25	0.300352	0.688822	1.89814	2.28308	KAT2A;ACTL6A
Ck1/Cdk5 regulation by type 1 glutamate receptors	2/25	0.300352	0.688822	1.89814	2.28308	GNB1;ADCY1
Metal ion solute carrier family (SLC) transporters	2/25	0.300352	0.688822	1.89814	2.28308	HEPH;SLC30A3
TPO signaling pathway	2/25	0.300352	0.688822	1.89814	2.28308	RASA1;PRKCA
Beta-oxidation of pristanoyl-CoA	1/8	0.301477	0.688822	3.11742	3.73797	AMACR
Binding of orexin and neuropeptides FF and QRFP to their receptors	1/8	0.301477	0.688822	3.11742	3.73797	HCRTR2
Bystander B cell activation	1/8	0.301477	0.688822	3.11742	3.73797	CD40
Codeine and morphine metabolism	1/8	0.301477	0.688822	3.11742	3.73797	ABCC2
Cross-presentation of particulate exogenous antigens (phagosomes)	1/8	0.301477	0.688822	3.11742	3.73797	ITGAV
Glucocorticoid and mineralcorticoid metabolism	1/8	0.301477	0.688822	3.11742	3.73797	HSD11B2
Glycogen biosynthesis	1/8	0.301477	0.688822	3.11742	3.73797	GYG1
Lysosphingolipid and lysophosphatidic acid (LPA) G-protein coupled receptors	1/8	0.301477	0.688822	3.11742	3.73797	S1PR3
NOD-like receptor (NLR) proteins	1/8	0.301477	0.688822	3.11742	3.73797	CD40
Nef-induced signal transduction	1/8	0.301477	0.688822	3.11742	3.73797	FYN
Organic cation transport	1/8	0.301477	0.688822	3.11742	3.73797	SLC22A2
RNA polymerase II C-terminal domain phosphorylation and interaction with capping enzyme	1/8	0.301477	0.688822	3.11742	3.73797	ERCC2
Recruitment of repair and signaling proteins to double-strand breaks	1/8	0.301477	0.688822	3.11742	3.73797	MDC1
Sema4D-mediated inhibition of cell attachment and migration	1/8	0.301477	0.688822	3.11742	3.73797	RHOA
Shuttle for transfer of acetyl groups from mitochondria to the cytosol	1/8	0.301477	0.688822	3.11742	3.73797	CS
Stabilization of mRNA by HuR	1/8	0.301477	0.688822	3.11742	3.73797	PRKCA
TSP1-induced apoptosis in microvascular endothelial cell	1/8	0.301477	0.688822	3.11742	3.73797	FYN
Visceral fat deposits and the metabolic syndrome	1/8	0.301477	0.688822	3.11742	3.73797	TNF
Chagas disease	6/104	0.305453	0.690623	1.33731	1.58599	MAPK11;PLCB4;IRAK1;ADCY1;TNF;CD3D
Gene expression	46/968	0.305736	0.690623	1.09275	1.29495	ZNF133;GTF2A1;NUP205;ZNF250;YWHAB;ADARB1;MED17;MED12;ZNF606;PCF11;NUP62;TPR;RPL13;ZNF248;ZNF585B;EARS2;RBM5;ZNF585A;ZNF287;ZNF540;HSPA8;TBP;ZNF141;NUP133;MARS2;ZNF10;PRKCA;SNUPN;TARBP2;PAN2;MAPK11;KAT2A;CNOT6;PSMA4;HNRNPUL1;ZNF419;ZNF616;ZNF30;ERCC2;PSME1;ZNF613;ZNF337;MAMLD1;ZNF114;ZNF333;TAF1
Neuroactive ligand-receptor interaction	14/272	0.307411	0.690623	1.18619	1.39919	PTGFR;GABBR1;GRIK1;TRPV1;HCRTR2;GRM2;CHRNG;TBXA2R;ADORA1;CHRNA10;NMUR1;S1PR3;GRIA3;GRIA4
Cell junction organization	5/84	0.308008	0.690623	1.38224	1.62777	CLDN10;CDH3;FBLIM1;ILK;PLEC
Interferon alpha/beta signaling	4/64	0.308382	0.690623	1.45575	1.71256	IFNA4;IFNA17;IFNA10;IP6K2
Amoebiasis	6/105	0.313188	0.690623	1.32373	1.53679	RAB5B;PLCB4;COL4A6;PRKCA;ADCY1;TNF
DNA repair	6/105	0.313188	0.690623	1.32373	1.53679	MDC1;PCNA;UBE2T;APEX1;ERCC2;RPA2
Neurotrophin signaling pathway	7/126	0.315923	0.690623	1.28492	1.48056	MAPK11;IRAK1;YWHAB;RIPK2;RPS6KA2;TP53;RHOA
TGF-beta regulation of skeletal system development	5/85	0.316681	0.690623	1.36489	1.56944	ID3;TNF;RHOA;ACVR2A;RBX1
Acyl chain remodelling of phosphatidylcholine	2/26	0.31675	0.690623	1.81895	2.09114	PLA2G4B;PLA2G4C
Interleukin-27-mediated signaling events	2/26	0.31675	0.690623	1.81895	2.09114	GATA3;TNF
Physiological and pathological hypertrophy of the heart	2/26	0.31675	0.690623	1.81895	2.09114	MAPK11;RHOA
TGF-beta signaling in development	2/26	0.31675	0.690623	1.81895	2.09114	ACVR1B;ACVR2A
Tetrasaccharide linker sequence formation in glycosaminoglycan biosynthesis	2/26	0.31675	0.690623	1.81895	2.09114	B3GAT2;B3GALT6
Glioma	4/65	0.31839	0.690623	1.43181	1.63867	PDGFRB;E2F2;PRKCA;TP53
Interleukin-12-mediated signaling events	4/65	0.31839	0.690623	1.43181	1.63867	EOMES;RIPK2;CD3D;NFKB2
Antigen-activated B-cell receptor generation of second messengers	11/211	0.321715	0.690623	1.20181	1.36296	MAP4K1;MAPK11;CD40;PRKCH;RASA1;ITPR1;ORAI1;PRKCA;ITPR3;FYN;NFKB2
Alzheimer's disease	9/169	0.323577	0.690623	1.22888	1.38657	PLCB4;NDUFB7;ITPR1;ITPR3;UQCR11;TNF;TP53;RYR3;SNCA
Alpha-6 beta-1 and alpha-6 beta-4 integrin signaling	3/46	0.328002	0.690623	1.52307	1.69782	YWHAB;PMP22;PRKCA
Syndecan 1 pathway	3/46	0.328002	0.690623	1.52307	1.69782	HGF;COL4A6;COL4A5
Beta-1 integrin cell surface interactions	4/66	0.328424	0.690623	1.40864	1.56845	COL4A6;COL4A5;ITGAV;NPNT
Destabilization of mRNA by AUF1 (hnRNP D0)	4/66	0.328424	0.690623	1.40864	1.56845	HSPA8;PSMA4;PSME1;RBX1
Thyroid-stimulating hormone signaling pathway	4/66	0.328424	0.690623	1.40864	1.56845	PDE4D;APEX1;GNB1;ADCY3
Antigen presentation: folding, assembly, and peptide loading of class I MHC proteins	13/255	0.328635	0.690623	1.17392	1.30635	HSPA5;FBXW11;RBX1;TAPBP;PSMA4;PSME1;ASB6;TRIM36;ANAPC5;ITGAV;SAE1;SEC24C;SEC31A
Alpha defensins	1/9	0.33212	0.690623	2.7276	3.00652	DEFA4
Alpha-4 beta-7 integrin signaling	1/9	0.33212	0.690623	2.7276	3.00652	RHOA
Benzo(a)pyrene metabolism	1/9	0.33212	0.690623	2.7276	3.00652	AKR1A1
Calcium-activated potassium channels	1/9	0.33212	0.690623	2.7276	3.00652	KCNMB1
EGFR transactivation by gastrin	1/9	0.33212	0.690623	2.7276	3.00652	PRKCA
HIV-induced T cell apoptosis	1/9	0.33212	0.690623	2.7276	3.00652	CD3D
Ketone body biosynthesis and degradation	1/9	0.33212	0.690623	2.7276	3.00652	BDH2
Nef-mediated CD4 downregulation	1/9	0.33212	0.690623	2.7276	3.00652	AP2B1
Nitric oxide effects	1/9	0.33212	0.690623	2.7276	3.00652	MB
Opsins	1/9	0.33212	0.690623	2.7276	3.00652	RHO
PI3K/AKT signalling	1/9	0.33212	0.690623	2.7276	3.00652	RHOA
Tat-mediated elongation of the HIV-1 transcript	1/9	0.33212	0.690623	2.7276	3.00652	ERCC2
Type I hemidesmosome assembly	1/9	0.33212	0.690623	2.7276	3.00652	PLEC
Control of gene expression by vitamin D receptor	2/27	0.333057	0.690623	1.7461	1.91974	SMARCC2;ACTL6A
FSH signaling pathway	2/27	0.333057	0.690623	1.7461	1.91974	PRKCA;CYP19A1
Glycolysis	2/27	0.333057	0.690623	1.7461	1.91974	ENO2;ENO3
Glycosphingolipid biosynthesis: lacto and neolacto series	2/27	0.333057	0.690623	1.7461	1.91974	FUT4;B4GALT4
Pentose phosphate pathway	2/27	0.333057	0.690623	1.7461	1.91974	RPE;PGLS
Proteins and DNA sequences in cardicac structures	2/27	0.333057	0.690623	1.7461	1.91974	JAG1;HAND2
RORA activates circadian expression	2/27	0.333057	0.690623	1.7461	1.91974	HDAC3;NPAS2
Rev-mediated nuclear export of HIV-1 RNA	2/27	0.333057	0.690623	1.7461	1.91974	NUP205;TPR
TNF/stress-related signaling	2/27	0.333057	0.690623	1.7461	1.91974	CASP2;TNF
TWEAK regulation of gene expression	2/27	0.333057	0.690623	1.7461	1.91974	CXCL10;TNF
VEGFR1 pathway	2/27	0.333057	0.690623	1.7461	1.91974	RASA1;PRKCA
eIF4E and p70 S6 kinase regulation	2/27	0.333057	0.690623	1.7461	1.91974	MKNK1;PRKCA
Adipocytokine signaling pathway	4/67	0.338474	0.700533	1.38621	1.50169	PRKAA1;ACSL5;TNF;PRKAB1
HIF-1 degradation in normoxia	5/88	0.34286	0.708277	1.31535	1.408	MAPK11;PSMA4;USP20;APEX1;PSME1
Signaling by insulin receptor	6/109	0.344406	0.710135	1.27206	1.35593	FGF7;PRKAA1;YWHAB;FGF18;PRKAB1;FGF4
G-protein beta-gamma signalling	2/28	0.34925	0.713105	1.67886	1.7661	GNB1;RHOA
PERK-regulated gene expression	2/28	0.34925	0.713105	1.67886	1.7661	HSPA5;DDIT3
PKB-mediated events	2/28	0.34925	0.713105	1.67886	1.7661	PRKAA1;PRKAB1
Prostate cancer	5/89	0.351623	0.713105	1.29963	1.35836	PDGFRB;TCF7L1;E2F2;TP53;CREB5
Chondroitin sulfate/dermatan sulfate metabolism	3/48	0.352282	0.713105	1.45523	1.51827	B3GAT2;DSE;B3GALT6
Diurnally regulated genes with circadian orthologs	3/48	0.352282	0.713105	1.45523	1.51827	HSPA8;PSMA4;AZIN1
PPAR signaling pathway	4/69	0.358599	0.713105	1.34341	1.37774	FABP6;ILK;ACSL5;CYP8B1
Activation of the AP-1 family of transcription factors	1/10	0.361419	0.713105	2.4244	2.46736	MAPK11
Apoptotic DNA fragmentation and tissue homeostasis	1/10	0.361419	0.713105	2.4244	2.46736	ENDOG
COPI-mediated vesicle transport	1/10	0.361419	0.713105	2.4244	2.46736	COPZ1
Calcitonin-like ligand receptors	1/10	0.361419	0.713105	2.4244	2.46736	CALCA
Cdc25 and Chk1 regulatory pathway in response to DNA damage	1/10	0.361419	0.713105	2.4244	2.46736	CDC25B
Dermatan sulfate biosynthesis	1/10	0.361419	0.713105	2.4244	2.46736	DSE
E2F-enabled inhibition of pre-replication complex formation	1/10	0.361419	0.713105	2.4244	2.46736	ORC4
Ethanol oxidation	1/10	0.361419	0.713105	2.4244	2.46736	ACSS1
Free radical-induced apoptosis	1/10	0.361419	0.713105	2.4244	2.46736	TNF
IKK complex recruitment by IRAK1	1/10	0.361419	0.713105	2.4244	2.46736	IRAK1
Insulin secretion regulation by acetylcholine	1/10	0.361419	0.713105	2.4244	2.46736	PRKCA
Nef-mediated downregulation of MHC class I complex cell surface expression	1/10	0.361419	0.713105	2.4244	2.46736	AP1S1
Netrin mediated repulsion signals	1/10	0.361419	0.713105	2.4244	2.46736	FYN
PIP biosynthesis at the late endosome membrane	1/10	0.361419	0.713105	2.4244	2.46736	MTMR4
Phospholipase C signaling pathway	1/10	0.361419	0.713105	2.4244	2.46736	PRKCA
Splicing regulation through Sam68	1/10	0.361419	0.713105	2.4244	2.46736	RASA1
Tetrahydrobiopterin (BH4) biosynthesis, recycling, salvage and regulation	1/10	0.361419	0.713105	2.4244	2.46736	GCHFR
Angiopoietin receptor Tie2-mediated signaling	3/49	0.364387	0.713618	1.42352	1.43709	RASA1;FYN;TNF
BARD1 signaling events	2/29	0.365306	0.713618	1.61659	1.62794	PCNA;TP53
CDO in myogenesis	2/29	0.365306	0.713618	1.61659	1.62794	MAPK11;BOC
Histidine metabolism	2/29	0.365306	0.713618	1.61659	1.62794	ALDH3A1;LCMT1
Matrix metalloproteinases	2/29	0.365306	0.713618	1.61659	1.62794	TCF20;TNF
Lipid metabolism regulation by peroxisome proliferator-activated receptor alpha (PPAR-alpha)	6/112	0.368011	0.713618	1.23586	1.23542	MED12;HDAC3;NRF1;NPAS2;MED29;MED17
MicroRNA regulation of DNA damage response	4/70	0.36866	0.713618	1.32299	1.32019	CCNB2;TLK1;RPA2;TP53
Neural crest differentiation	5/91	0.369176	0.713618	1.26927	1.2648	TCF7L1;HDAC3;HEY2;PMP22;NFKB2
Viral myocarditis	4/71	0.378711	0.713618	1.30317	1.26536	CD40;MYH9;FYN;MYH11
Cytokine-cytokine receptor interaction	13/265	0.379361	0.713618	1.12674	1.09211	PDGFRB;IFNA4;CD40;CCL21;HGF;IFNA17;TNFRSF18;ACVR1B;TNF;ACVR2A;CXCL10;CCL19;IFNA10
Mitotic G1-G1/S phases	7/135	0.380419	0.713618	1.19401	1.15399	ORC4;POLA2;PSMA4;PCNA;PSME1;E2F2;RPA2
Apoptosis intrinsic pathway	2/30	0.381208	0.713618	1.55878	1.5033	YWHAB;TP53
Asthma	2/30	0.381208	0.713618	1.55878	1.5033	CD40;TNF
Interferon-beta enhancer pathway	2/30	0.381208	0.713618	1.55878	1.5033	GTF2A1;SMARCC2
Nectin adhesion pathway	2/30	0.381208	0.713618	1.55878	1.5033	PDGFRB;ITGAV
Nuclear events mediated by MAP kinases	2/30	0.381208	0.713618	1.55878	1.5033	MAPK11;RPS6KA2
PDGFA signaling pathway	2/30	0.381208	0.713618	1.55878	1.5033	RASA1;PRKCA
Retinoic acid receptor-mediated signaling	2/30	0.381208	0.713618	1.55878	1.5033	HDAC3;PRKCA
Signaling pathway from G-protein families	2/30	0.381208	0.713618	1.55878	1.5033	PRKCA;ADCY1
TNFR1 signaling pathway	2/30	0.381208	0.713618	1.55878	1.5033	CASP2;TNF
Tumor necrosis factor (TNF) pathway	2/30	0.381208	0.713618	1.55878	1.5033	TNF;NFKB2
p38-alpha and p38-beta regulation	2/30	0.381208	0.713618	1.55878	1.5033	MAPK11;FYN
Metabolism of vitamins and cofactors	3/51	0.388473	0.713618	1.36406	1.28976	FPGS;MOCOS;MTHFR
Myocyte adrenergic pathway	4/72	0.388746	0.713618	1.28394	1.21311	PLA2G4B;PLA2G4C;ITPR1;RYR3
Acetylcholine neurotransmitter release cycle	1/11	0.389435	0.713618	2.18185	2.05761	SNAP25
Attenuation of GPCR signaling	1/11	0.389435	0.713618	2.18185	2.05761	PRKCA
B lymphocyte cell surface molecules	1/11	0.389435	0.713618	2.18185	2.05761	CD40
BTG family proteins and cell cycle regulation	1/11	0.389435	0.713618	2.18185	2.05761	TP53
CD28-dependent Vav1 pathway	1/11	0.389435	0.713618	2.18185	2.05761	FYN
Cystic fibrosis transmembrane conductance regulator (CFTR) and beta 2 adrenergic receptor (b2AR) pathway	1/11	0.389435	0.713618	2.18185	2.05761	ADCY1
Folate biosynthesis	1/11	0.389435	0.713618	2.18185	2.05761	FPGS
Glypican-3 pathway	1/11	0.389435	0.713618	2.18185	2.05761	FGF7
Mechanism of protein import into the nucleus	1/11	0.389435	0.713618	2.18185	2.05761	NUP62
Methylation	1/11	0.389435	0.713618	2.18185	2.05761	PNMT
Purine ribonucleoside monophosphate biosynthesis	1/11	0.389435	0.713618	2.18185	2.05761	PFAS
Recycling of bile acids and salts	1/11	0.389435	0.713618	2.18185	2.05761	FABP6
SUMOylation as a mechanism to modulate CtBP-dependent gene responses	1/11	0.389435	0.713618	2.18185	2.05761	SAE1
Signaling by activated point mutants of FGFR1	1/11	0.389435	0.713618	2.18185	2.05761	FGF4
Sonic Hedgehog (SHH) receptor PTCH1 regulation of cell cycle	1/11	0.389435	0.713618	2.18185	2.05761	CDC25B
Stress fiber formation mediated by Rho-selective guanine exchange factor AKAP13	1/11	0.389435	0.713618	2.18185	2.05761	RHOA
Unwinding of DNA	1/11	0.389435	0.713618	2.18185	2.05761	GINS2
p38 gamma/delta MAPK pathway	1/11	0.389435	0.713618	2.18185	2.05761	STMN1
Diabetes pathways	7/137	0.394872	0.713618	1.17552	1.09228	PCSK1;SNAP25;HSPA5;DDIT3;PLA2G4B;GOSR2;SEC31A
Activated NOTCH1 signaling in the nucleus	2/31	0.396936	0.713618	1.50495	1.39054	JAG1;CNTN1
Alpha-6 beta-4 integrin signaling pathway	2/31	0.396936	0.713618	1.50495	1.39054	PRKCA;RHOA
CD40/CD40L signaling	2/31	0.396936	0.713618	1.50495	1.39054	MAPK11;CD40
Gluconeogenesis	2/31	0.396936	0.713618	1.50495	1.39054	ENO2;ENO3
NF-kappaB activation by non-typeable Hemophilus influenzae	2/31	0.396936	0.713618	1.50495	1.39054	MAPK11;TNF
One-carbon metabolism	2/31	0.396936	0.713618	1.50495	1.39054	MTHFD1L;MTHFR
Prostaglandin biosynthesis and regulation	2/31	0.396936	0.713618	1.50495	1.39054	PTGFR;HSD11B2
Signal amplification	2/31	0.396936	0.713618	1.50495	1.39054	TBXA2R;GNB1
CXCR4 signaling pathway	6/116	0.399567	0.713618	1.19067	1.09229	GNB1;PRKCA;ITGAV;FYN;CD3D;RHOA
Endometrial cancer	3/52	0.400435	0.713618	1.33615	1.22285	TCF7L1;ILK;TP53
Mitochondrial protein import	3/52	0.400435	0.713618	1.33615	1.22285	CS;IDH3G;FXN
Signaling events mediated by PTP1B	3/52	0.400435	0.713618	1.33615	1.22285	PDGFRB;FYN;RHOA
Vitamin B12 metabolism	3/52	0.400435	0.713618	1.33615	1.22285	MTHFR;TNF;NFKB2
Capped intron-containing pre-mRNA processing	7/138	0.402099	0.713618	1.16648	1.06273	NUP205;HNRNPUL1;NUP133;PCF11;TPR;NUP62;RBM5
Adherens junction cell adhesion	4/74	0.408742	0.713618	1.24713	1.11577	TCF7L1;PTPRB;FYN;RHOA
RANKL regulation of apoptosis and immune response	4/74	0.408742	0.713618	1.24713	1.11577	PYCARD;ADORA1;TNF;SNCA
T cell receptor signaling pathway	7/139	0.409324	0.713618	1.15758	1.03401	MAPK11;RASA1;PRKCA;FYN;TNF;CD3D;RHOA
p53 signaling pathway	7/139	0.409324	0.713618	1.15758	1.03401	PYCARD;KAT2A;PCNA;HGF;E2F2;PRKAB1;TP53
PI3K pathway	3/53	0.41233	0.713618	1.30936	1.16	PRKCH;RPS6KA2;PRKCA
Protein folding	3/53	0.41233	0.713618	1.30936	1.16	NOP56;TUBA1B;TBCD
Alpha-synuclein signaling	2/32	0.412477	0.713618	1.4547	1.28825	FYN;SNCA
Netrin-mediated signaling events	2/32	0.412477	0.713618	1.4547	1.28825	FYN;RHOA
Prothrombin activation intrinsic pathway	2/32	0.412477	0.713618	1.4547	1.28825	COL4A6;COL4A5
Serotonin HTR1 group and FOS pathway	2/32	0.412477	0.713618	1.4547	1.28825	ITPR1;RHOA
Transport of glucose and other sugars, bile salts and organic acids, metal ions and amine compounds	5/96	0.413009	0.713618	1.19921	1.06045	SLC44A1;HEPH;SLC30A3;SLC22A2;SLC6A1
Adaptive immune system	28/606	0.415091	0.713618	1.05816	0.930391	CD40;YWHAB;ITPR1;ITPR3;ICAM4;CD3D;KIF5C;KIF3A;AP1S1;ITGAV;FYN;SEC31A;DYNC1H1;HSPA5;RIPK2;FBXW11;AP2B1;RBX1;TAPBP;PSMA4;PSME1;ASB6;ORAI1;TRIM36;ANAPC5;KIF2C;SAE1;SEC24C
p53 activity regulation	6/118	0.415323	0.713618	1.16928	1.02745	CCNB2;RASSF1;PCNA;TTC5;EI24;TP53
Beta-arrestins in GPCR desensitization	1/12	0.416223	0.713618	1.9834	1.73851	ADCY1
Caspase-mediated cleavage of cytoskeletal proteins	1/12	0.416223	0.713618	1.9834	1.73851	PLEC
Granzyme A-mediated apoptosis pathway	1/12	0.416223	0.713618	1.9834	1.73851	APEX1
Inhibition of replication initiation of damaged DNA by RB1/E2F1	1/12	0.416223	0.713618	1.9834	1.73851	POLA2
NF-kappaB activation through FADD/RIP-1 pathway	1/12	0.416223	0.713618	1.9834	1.73851	TRIM25
Nucleotide G-protein coupled receptors (GPCRs)	1/12	0.416223	0.713618	1.9834	1.73851	ADORA1
Opening of calcium channels triggered by depolarization of the presynaptic terminal	1/12	0.416223	0.713618	1.9834	1.73851	CACNB2
Parkin role in the ubiquitin-proteasomal pathway	1/12	0.416223	0.713618	1.9834	1.73851	SNCA
Peptide hormone biosynthesis	1/12	0.416223	0.713618	1.9834	1.73851	PCSK1
Resolution of AP sites via the single-nucleotide replacement pathway	1/12	0.416223	0.713618	1.9834	1.73851	APEX1
SODD/TNFR1 signaling pathway	1/12	0.416223	0.713618	1.9834	1.73851	TNF
Salmonella infection	1/12	0.416223	0.713618	1.9834	1.73851	ACTA1
Tandem pore domain potassium channels	1/12	0.416223	0.713618	1.9834	1.73851	KCNK17
Toll-like receptor endosomal trafficking and processing	1/12	0.416223	0.713618	1.9834	1.73851	TLR7
SLC-mediated transmembrane transport	12/251	0.421456	0.720817	1.09613	0.947097	NUP205;SLC44A1;SLC30A3;HEPH;NUP133;SLC34A1;SLC22A2;TPR;NUP62;SLC6A1;SLC37A4;SLC7A2
Mitochondrial pathway of apoptosis: BH3-only Bcl-2 family	5/97	0.421733	0.720817	1.18612	1.02407	PRKCH;CAPN10;CASP2;PRKCA;CD47
EGF/EGFR signaling pathway	7/141	0.423757	0.721581	1.14019	0.978959	MAP4K1;PCNA;RPS6KA2;RASA1;STMN1;PRKCA;AP2B1
Binding of chemokines to chemokine receptors	3/54	0.42415	0.721581	1.28362	1.10092	CXCL10;CCL21;CCL19
Meiotic recombination	3/54	0.42415	0.721581	1.28362	1.10092	BLM;RPA2;MLH3
Glycoprotein VI-mediated activation cascade	2/33	0.427817	0.724454	1.40771	1.19523	FYN;RHOA
Propanoate metabolism	2/33	0.427817	0.724454	1.40771	1.19523	SUCLG2;ACSS1
Syndecan 2 pathway	2/33	0.427817	0.724454	1.40771	1.19523	RASA1;RHOA
VEGF signaling pathway	4/76	0.428602	0.724666	1.21236	1.02714	MAPK11;PLA2G4B;JMJD7-PLA2G4B;PRKCA
Transmembrane transport of small molecules	20/432	0.433976	0.727643	1.05986	0.884736	NUP205;ABCC2;SLC44A1;SLC30A3;NUP133;SLC34A1;SLC22A2;ADCY3;HTR3A;ADCY1;SLC6A1;ADCY6;SLC7A2;HEPH;FXYD2;TPR;GNB1;NUP62;SLC37A4;HMOX2
Basal cell carcinoma	3/55	0.435887	0.727643	1.25887	1.04533	TCF7L1;FZD2;TP53
CBL-mediated ligand-induced downregulation of EGF receptors	1/13	0.441837	0.727643	1.81802	1.48498	PRKCA
CTL mediated immune response against target cells	1/13	0.441837	0.727643	1.81802	1.48498	CD3D
Death receptor signaling	1/13	0.441837	0.727643	1.81802	1.48498	TNF
Double stranded RNA-induced gene expression	1/13	0.441837	0.727643	1.81802	1.48498	TP53
Glucose-dependent insulinotropic polypeptide (GIP) biosynthesis, secretion, and inactivation	1/13	0.441837	0.727643	1.81802	1.48498	PCSK1
Irinotecan pathway	1/13	0.441837	0.727643	1.81802	1.48498	ABCC2
Keap1-Nrf2 pathway	1/13	0.441837	0.727643	1.81802	1.48498	PRKCA
Organic cation/anion/zwitterion transport	1/13	0.441837	0.727643	1.81802	1.48498	SLC22A2
PIP biosynthesis at the early endosome membrane	1/13	0.441837	0.727643	1.81802	1.48498	MTMR4
Platelet adhesion to exposed collagen	1/13	0.441837	0.727643	1.81802	1.48498	FYN
Signal regulatory protein (SIRP) family interactions	1/13	0.441837	0.727643	1.81802	1.48498	CD47
T helper cell surface molecules	1/13	0.441837	0.727643	1.81802	1.48498	CD3D
p27 phosphorylation regulation during cell cycle progression	1/13	0.441837	0.727643	1.81802	1.48498	RBX1
Fructose and mannose metabolism	2/34	0.442942	0.727643	1.36364	1.11044	GMPPB;GMPPA
HIF-2-alpha transcription factor network	2/34	0.442942	0.727643	1.36364	1.11044	APEX1;FXN
Monoamine transport	2/34	0.442942	0.727643	1.36364	1.11044	SLC6A1;TNF
Nuclear receptors in lipid metabolism and toxicity	2/34	0.442942	0.727643	1.36364	1.11044	ABCC2;CYP8B1
Steroid hormone biosynthesis	3/56	0.447533	0.733183	1.23505	0.992986	HSD11B2;HSD17B2;CYP19A1
Integrin-mediated cell adhesion	5/100	0.44775	0.733183	1.14848	0.922825	CAPN10;RHO;ILK;ITGAV;FYN
Chemokine signaling pathway	9/189	0.448582	0.733183	1.09119	0.874764	CXCL10;PLCB4;CCL21;GNB1;ADCY3;ADCY1;CCL19;RHOA;ADCY6
RNA polymerase II transcription	5/101	0.456359	0.733183	1.13646	0.891523	GTF2A1;TBP;PCF11;ERCC2;TAF1
Arf6 signal transduction regulation	2/35	0.457843	0.733183	1.32225	1.03298	ACAP1;HGF
Base excision repair	2/35	0.457843	0.733183	1.32225	1.03298	PCNA;APEX1
Interleukin-7 signaling pathway	2/35	0.457843	0.733183	1.32225	1.03298	HGF;FYN
Linoleic acid metabolism	2/35	0.457843	0.733183	1.32225	1.03298	PLA2G4B;JMJD7-PLA2G4B
Prion diseases	2/35	0.457843	0.733183	1.32225	1.03298	HSPA5;FYN
Antigen processing: cross presentation	4/79	0.458044	0.733183	1.16368	0.908591	PSMA4;PSME1;ITGAV;TAPBP
p73 transcription factor network	4/79	0.458044	0.733183	1.16368	0.908591	MAPK11;WT1;HEY2;CASP2
Keratinocyte differentiation	3/57	0.459081	0.733183	1.21212	0.943666	PRKCH;PRKCA;TNF
Mechanism of gene regulation by peroxisome proliferators via PPAR-alpha	3/57	0.459081	0.733183	1.21212	0.943666	DUT;PRKCA;TNF
PI3K cascade	3/57	0.459081	0.733183	1.21212	0.943666	FGF7;FGF18;FGF4
Pre-NOTCH expression and processing	3/57	0.459081	0.733183	1.21212	0.943666	KAT2A;TP53;MAMLD1
Interleukin-2 signaling pathway	38/847	0.465978	0.733183	1.02531	0.782947	SNAP25;BLM;PTPRR;PCNA;YWHAB;GATA3;TNF;MEOX1;GALNT10;RNF139;ZBED2;E2F2;TLK1;FLNB;FYN;CYTIP;FKTN;NOP56;EOMES;PTPRN2;KLF13;VPS13A;TBCD;HTR3A;PRKCA;TRPV1;SORBS3;RHOA;CDC25B;GCHFR;MAPK11;ALDH3A1;TRIM39;RASA1;ID3;S100A4;EZH2;TAF1
Acetylcholine binding and downstream events	1/14	0.466328	0.733183	1.67808	1.28015	CHRNG
DCC-mediated attractive signaling	1/14	0.466328	0.733183	1.67808	1.28015	FYN
Glycogen breakdown (glycogenolysis)	1/14	0.466328	0.733183	1.67808	1.28015	GYG1
HIV-1 early elongation complex formation	1/14	0.466328	0.733183	1.67808	1.28015	ERCC2
Initiation of the second proteolytic cleavage of Notch receptor by receptor-ligand binding	1/14	0.466328	0.733183	1.67808	1.28015	JAG1
Intronless pre-mRNA processing	1/14	0.466328	0.733183	1.67808	1.28015	PCF11
Porphyrin metabolism	1/14	0.466328	0.733183	1.67808	1.28015	HMOX2
Retrograde neurotrophin signaling	1/14	0.466328	0.733183	1.67808	1.28015	AP2B1
S1P/S1P4 pathway	1/14	0.466328	0.733183	1.67808	1.28015	RHOA
Sema3A-plexin repulsion signaling by inhibiting integrin adhesion	1/14	0.466328	0.733183	1.67808	1.28015	FYN
Signaling by NOTCH2	1/14	0.466328	0.733183	1.67808	1.28015	JAG1
T cell receptor/JNK pathway	1/14	0.466328	0.733183	1.67808	1.28015	MAP4K1
T cell receptor/Ras pathway	1/14	0.466328	0.733183	1.67808	1.28015	PRKCA
TRAF3-dependent IRF activation pathway	1/14	0.466328	0.733183	1.67808	1.28015	TRIM25
Nuclear beta-catenin signaling and target gene transcription regulation	4/80	0.467745	0.73436	1.14831	0.872522	MED12;TCF7L1;YWHAB;FGF4
G alpha (s) signaling events	6/125	0.46995	0.735536	1.1001	0.830715	CALCA;PDE4D;GNB1;ADCY3;ADCY1;ADCY6
Autodegradation of Cdh1 by Cdh1-APC/C	3/58	0.470525	0.735536	1.19001	0.89716	PSMA4;PSME1;ANAPC5
HIV-1 Nef as negative effector of Fas and TNF	3/58	0.470525	0.735536	1.19001	0.89716	RASA1;CASP2;TNF
PI3K/PLC/TRK pathway	2/36	0.47251	0.735536	1.28329	0.962082	YWHAB;TRPV1
SNARE interactions in vesicular transport	2/36	0.47251	0.735536	1.28329	0.962082	SNAP25;GOSR2
Signaling to ERKs	2/36	0.47251	0.735536	1.28329	0.962082	MAPK11;YWHAB
MAP kinase signaling pathway	4/81	0.477383	0.74207	1.13334	0.83803	MAP4K1;MAPK11;RPS6KA2;MKNK1
ATF2 transcription factor network	3/59	0.481857	0.742387	1.1687	0.853279	MAPK11;DDIT3;PRKCA
Caspase cascade in apoptosis	3/59	0.481857	0.742387	1.1687	0.853279	ACTA1;CASP2;TNF
Telomere maintenance	3/59	0.481857	0.742387	1.1687	0.853279	POLA2;PCNA;RPA2
Allograft rejection	2/37	0.486934	0.742387	1.24656	0.897059	CD40;TNF
APC/C-mediated degradation of cell cycle proteins	4/82	0.486953	0.742387	1.11875	0.805038	PSMA4;PSME1;BUB1B;ANAPC5
ATR activation in response to replication stress	1/15	0.489746	0.742387	1.55814	1.11231	RPA2
Adhesion and diapedesis of granulocytes	1/15	0.489746	0.742387	1.55814	1.11231	TNF
Arf6 vesicle-mediated transport	1/15	0.489746	0.742387	1.55814	1.11231	RHOA
BMP signaling pathway in stem cells	1/15	0.489746	0.742387	1.55814	1.11231	ACVR2A
Biogenic amine biosynthesis	1/15	0.489746	0.742387	1.55814	1.11231	PNMT
Glycosaminoglycan biosynthesis: keratan sulfate	1/15	0.489746	0.742387	1.55814	1.11231	B4GALT4
Glycosylation of mammalian N-linked oligosaccarides	1/15	0.489746	0.742387	1.55814	1.11231	FUT4
Interleukin-17 signaling pathway	1/15	0.489746	0.742387	1.55814	1.11231	CD3D
PRC2 complex long-term gene silencing through modification of histone tails	1/15	0.489746	0.742387	1.55814	1.11231	EZH2
Prolactin receptor signaling pathway	1/15	0.489746	0.742387	1.55814	1.11231	RBX1
Sema3A/PAK-dependent axon repulsion	1/15	0.489746	0.742387	1.55814	1.11231	FYN
Signaling to p38 via RIT and RIN	1/15	0.489746	0.742387	1.55814	1.11231	YWHAB
TrkA receptor signaling pathway	1/15	0.489746	0.742387	1.55814	1.11231	PRKCA
Ephrin receptor B forward pathway	3/60	0.493074	0.743073	1.14814	0.811846	RASA1;FYN;EPHB3
Neurotrophic factor-mediated Trk receptor signaling	3/60	0.493074	0.743073	1.14814	0.811846	RASA1;GIPC1;RHOA
Signaling by the B cell receptor (BCR)	7/151	0.495009	0.743073	1.06045	0.745686	PSMA4;FBXW11;PSME1;ITPR1;ORAI1;ITPR3;FYN
BMAL1-CLOCK/NPAS2 activates circadian expression	2/38	0.50111	0.743073	1.21187	0.837319	HDAC3;NPAS2
Signal transduction through IL-1R	2/38	0.50111	0.743073	1.21187	0.837319	IRAK1;TNF
FGF signaling pathway	3/61	0.504168	0.743073	1.12828	0.772701	HGF;FGF18;FGF4
Glucose metabolism	3/61	0.504168	0.743073	1.12828	0.772701	ENO2;ENO3;GYG1
Leptin signaling pathway	3/61	0.504168	0.743073	1.12828	0.772701	FYN;SOCS7;RHOA
Signal transduction	45/1020	0.505639	0.743073	1.00673	0.686521	OR2A1;CALCA;HDAC3;ITPR1;ADCY3;ICAM4;ITPR3;ADCY1;MTMR4;ADCY6;FGF4;GRM2;FGF7;IRAK1;MKNK1;HEY2;ADORA1;CASP2;ITGAV;FYN;CCL19;GPR39;LINGO1;OR4D1;GABBR1;JAG1;FZD2;CCL21;AP2B1;MYO9A;HCRTR2;ACVR2A;HEYL;CXCL10;MAPK11;KAT2A;FGF18;GNB1;CNTN1;OR2A12;COL4A5;NMUR1;MAMLD1;ITGB3BP;OR2A14
Differentiation pathway in PC12 cells	4/84	0.505873	0.743073	1.09066	0.743255	PLCB4;ADCY3;ADCY1;ADCY6
ECM-receptor interaction	4/84	0.505873	0.743073	1.09066	0.743255	SV2C;COL4A6;ITGAV;CD47
Small cell lung cancer	4/84	0.505873	0.743073	1.09066	0.743255	COL4A6;E2F2;ITGAV;TP53
Jak-STAT signaling pathway	9/199	0.510433	0.743073	1.03321	0.694829	PTPRD;IFNA4;PTPRR;PTPRB;PTP4A3;IFNA17;SOCS7;IFNA10;SOCS5
Acyl chain remodelling of phosphatidylinositol	1/16	0.512137	0.743073	1.45419	0.973086	PLA2G4C
Amine-derived hormones	1/16	0.512137	0.743073	1.45419	0.973086	PNMT
Amino acid biosynthesis and interconversion (transamination)	1/16	0.512137	0.743073	1.45419	0.973086	PYCR1
CD40L signaling pathway	1/16	0.512137	0.743073	1.45419	0.973086	CD40
Cell death signaling by NRIF in the nucleus	1/16	0.512137	0.743073	1.45419	0.973086	ITGB3BP
Ghrelin biosynthesis, secretion, and deacylation	1/16	0.512137	0.743073	1.45419	0.973086	PCSK1
Glutamate neurotransmitter release cycle	1/16	0.512137	0.743073	1.45419	0.973086	SNAP25
Inhibition of platelet activation by aspirin	1/16	0.512137	0.743073	1.45419	0.973086	PRKCA
Inhibitor of DNA binding (ID) signaling pathway	1/16	0.512137	0.743073	1.45419	0.973086	ID3
Interleukin-10 anti-inflammatory signaling pathway	1/16	0.512137	0.743073	1.45419	0.973086	TNF
Nucleotide-like (purinergic) G-protein coupled receptors	1/16	0.512137	0.743073	1.45419	0.973086	ADORA1
Other semaphorin interactions	1/16	0.512137	0.743073	1.45419	0.973086	SEMA7A
PI3K subunit p85 role in regulation of actin organization and cell migration	1/16	0.512137	0.743073	1.45419	0.973086	RHOA
Protein kinase A (PKA) at the centrosome	1/16	0.512137	0.743073	1.45419	0.973086	RHOA
Rap1 signaling	1/16	0.512137	0.743073	1.45419	0.973086	YWHAB
Serotonin receptor 2 and ELK-SRF/GATA4 signaling	1/16	0.512137	0.743073	1.45419	0.973086	ITPR1
Sprouty regulation of FGF signaling	1/16	0.512137	0.743073	1.45419	0.973086	MKNK1
TGF-beta receptor signaling in EMT (epithelial to mesenchymal transition)	1/16	0.512137	0.743073	1.45419	0.973086	RHOA
E-cadherin nascent AJ-like junctions pathway	2/39	0.515031	0.743073	1.17906	0.782339	CYFIP2;RHOA
FAS pathway and stress induction of heat shock protein regulation	2/39	0.515031	0.743073	1.17906	0.782339	RIPK2;TNF
Iron uptake and transport	2/39	0.515031	0.743073	1.17906	0.782339	HEPH;HMOX2
Colorectal cancer	3/62	0.515136	0.743073	1.1091	0.735696	TCF7L1;TP53;RHOA
Shigellosis	3/62	0.515136	0.743073	1.1091	0.735696	MAPK11;FBXW11;RIPK2
C-Myb transcription factor network	4/85	0.515216	0.743073	1.07714	0.714329	PTCRA;HSPA8;GATA3;SND1
Glycerophospholipid biosynthesis	4/86	0.524476	0.747585	1.06395	0.686628	CDS1;SLC44A1;PLA2G4B;PLA2G4C
Acyl chain remodelling of phosphatidylglycerol	1/17	0.533547	0.747585	1.36323	0.85639	PLA2G4B
Acyl chain remodelling of phosphatidylserine	1/17	0.533547	0.747585	1.36323	0.85639	PLA2G4B
Beta-arrestin-dependent recruitment of Src kinases in GPCR signaling	1/17	0.533547	0.747585	1.36323	0.85639	ADCY1
Cell to cell adhesion signaling	1/17	0.533547	0.747585	1.36323	0.85639	ACTA1
Cells and molecules involved in local acute inflammatory response	1/17	0.533547	0.747585	1.36323	0.85639	TNF
Destabilization of mRNA by KSRP	1/17	0.533547	0.747585	1.36323	0.85639	MAPK11
Estrogen metabolism	1/17	0.533547	0.747585	1.36323	0.85639	SULT1A1
G1/S-specific transcription	1/17	0.533547	0.747585	1.36323	0.85639	PCNA
HIV-1 elongation complex formation in the absence of HIV-1 Tat	1/17	0.533547	0.747585	1.36323	0.85639	ERCC2
Inflammasomes	1/17	0.533547	0.747585	1.36323	0.85639	PYCARD
Integrin beta-5 pathway	1/17	0.533547	0.747585	1.36323	0.85639	ITGAV
Ion channel function in vascular endothelium	1/17	0.533547	0.747585	1.36323	0.85639	ADCY1
NO2-dependent IL-12 pathway in NK cells	1/17	0.533547	0.747585	1.36323	0.85639	CD3D
Nitric oxide metabolism	1/17	0.533547	0.747585	1.36323	0.85639	GCHFR
PIP biosynthesis at the Golgi membrane	1/17	0.533547	0.747585	1.36323	0.85639	PI4KA
Phenylalanine metabolism	1/17	0.533547	0.747585	1.36323	0.85639	ALDH3A1
SHC-related events	1/17	0.533547	0.747585	1.36323	0.85639	YWHAB
SHC1 events in EGFR signaling	1/17	0.533547	0.747585	1.36323	0.85639	YWHAB
SUMOylation by RanBP2 regulates transcriptional repression	1/17	0.533547	0.747585	1.36323	0.85639	NUP62
Syndecan 3 pathway	1/17	0.533547	0.747585	1.36323	0.85639	FYN
Zinc transporters	1/17	0.533547	0.747585	1.36323	0.85639	SLC30A3
Actin cytoskeleton regulation	10/226	0.533989	0.747585	1.0096	0.633403	CYFIP2;PDGFRB;FGF7;FGF18;MYH9;ITGAV;MYL9;FGF12;RHOA;FGF4
Collagen biosynthesis and modifying enzymes	3/64	0.536673	0.749433	1.07263	0.667566	COLGALT2;COL4A6;COL4A5
Ubiquitin-mediated degradation of phosphorylated Cdc25A	3/64	0.536673	0.749433	1.07263	0.667566	PSMA4;PSME1;AZIN1
Innate immune system	14/319	0.537476	0.749602	1.0009	0.62143	IFNA4;DEFB105A;RIPK2;IFNA17;DEFA4;NFKB2;PYCARD;MAPK11;IRAK1;RPS6KA2;TRIM25;CASP2;TLR7;IFNA10
ERK1/ERK2 MAPK pathway	3/65	0.547235	0.762245	1.05527	0.636198	PTPRR;RPS6KA2;MKNK1
Toll receptor cascades	7/159	0.549965	0.76273	1.00421	0.600418	MAPK11;IRAK1;RIPK2;RPS6KA2;UBE2T;TLR7;NFKB2
Ubiquitin-mediated proteolysis	6/136	0.552473	0.76273	1.00643	0.597166	PPIL2;HERC1;FBXW11;ANAPC5;SAE1;RBX1
Botulinum neurotoxicity	1/18	0.554019	0.76273	1.28297	0.757667	SNAP25
CBL signaling regulation	1/18	0.554019	0.76273	1.28297	0.757667	FYN
CDK regulation of DNA replication	1/18	0.554019	0.76273	1.28297	0.757667	ORC4
Fatty acyl-CoA biosynthesis	1/18	0.554019	0.76273	1.28297	0.757667	ACSL5
Nicotinic acetylcholine receptor role in the regulation of apoptosis	1/18	0.554019	0.76273	1.28297	0.757667	CHRNG
Pertussis toxin-insensitive CCR5 signaling in macrophage	1/18	0.554019	0.76273	1.28297	0.757667	PRKCA
Phosphatidylcholine biosynthesis	1/18	0.554019	0.76273	1.28297	0.757667	SLC44A1
Signaling events mediated by T cell protein tyrosine phosphatase (TC-PTP)	2/42	0.555217	0.76273	1.09046	0.64162	PDGFRB;HGF
VEGF, hypoxia, and angiogenesis	2/42	0.555217	0.76273	1.09046	0.64162	ACTA1;PRKCA
Natural killer cell-mediated cytotoxicity	6/137	0.559691	0.767916	0.998694	0.579612	IFNA4;IFNA17;PRKCA;FYN;TNF;IFNA10
TGF-beta signaling pathway	8/185	0.566733	0.769248	0.985404	0.559579	MAP4K1;CCNB2;MAPK11;ZNF423;TNF;TP53;RHOA;RBX1
SIDS susceptibility pathways	3/67	0.567929	0.769248	1.02219	0.578311	GATA3;TNF;NKX2-2
Telomerase regulation	3/67	0.567929	0.769248	1.02219	0.578311	BLM;WT1;NR2F2
Mitotic prometaphase	2/43	0.568078	0.769248	1.0638	0.601579	CENPF;KIF2C
Protein metabolism	19/442	0.56904	0.769248	0.978966	0.551945	NOP56;PIGU;ALG8;IDH3G;TBCD;GALNT10;CS;GMPPB;TUBA1B;MUC1;DAD1;MGAT4B;GMPPA;STT3A;RPL13;FXN;SEC24C;B4GALT4;SEC31A
Focal adhesion	10/233	0.573118	0.769248	0.977547	0.544166	PDGFRB;HGF;COL4A6;ILK;PRKCA;FLNB;ITGAV;FYN;MYL9;RHOA
Apoptosis modulation by HSP70	1/19	0.573592	0.769248	1.21163	0.673468	CASP2
Calcineurin in effects in keratinocyte differentiation	1/19	0.573592	0.769248	1.21163	0.673468	PRKCA
Cell cycle progression regulation by PLK3	1/19	0.573592	0.769248	1.21163	0.673468	TP53
Destabilization of mRNA by butyrate response factor 1 (BRF1)	1/19	0.573592	0.769248	1.21163	0.673468	YWHAB
FRS2-mediated activation	1/19	0.573592	0.769248	1.21163	0.673468	YWHAB
G-protein-independent seven transmembrane receptor signaling	1/19	0.573592	0.769248	1.21163	0.673468	MAPK11
Gap junction assembly	1/19	0.573592	0.769248	1.21163	0.673468	GJC2
Lissencephaly gene (LIS1) in neuronal migration and development	1/19	0.573592	0.769248	1.21163	0.673468	DNAH1
PTEN-dependent cell cycle arrest and apoptosis	1/19	0.573592	0.769248	1.21163	0.673468	ILK
TP53 network	1/19	0.573592	0.769248	1.21163	0.673468	TP53
Tamoxifen metabolism	1/19	0.573592	0.769248	1.21163	0.673468	SULT1A1
Tob role in T-cell activation	1/19	0.573592	0.769248	1.21163	0.673468	CD3D
Biological oxidations	6/139	0.573961	0.769248	0.983573	0.546074	SULT1A1;NAT1;ACSS1;CYP19A1;CYP8B1;SULT1A2
AMPK signaling	3/68	0.578055	0.77191	1.00641	0.551598	PRKAA1;PRKAB1;TP53
Activation of NF-kappaB in B cells	3/68	0.578055	0.77191	1.00641	0.551598	PSMA4;FBXW11;PSME1
Messenger RNA splicing: major pathway	3/68	0.578055	0.77191	1.00641	0.551598	HNRNPUL1;PCF11;RBM5
Heart development	2/44	0.580667	0.774457	1.03842	0.564464	HAND2;HEY2
Leukocyte transendothelial migration	5/117	0.586983	0.77582	0.973286	0.518528	CLDN10;MAPK11;PRKCA;MYL9;RHOA
Tricarboxylic acid (TCA) cycle and respiratory electron transport	5/117	0.586983	0.77582	0.973286	0.518528	CS;NDUFB7;IDH3G;SUCLG2;UQCR11
NFAT involvement in hypertrophy of the heart	3/69	0.58803	0.77582	0.991107	0.526255	ACTA1;HAND2;TNF
Phase I of biological oxidations: functionalization of compounds	3/69	0.58803	0.77582	0.991107	0.526255	ACSS1;CYP19A1;CYP8B1
Cell differentiation pathway	1/20	0.592308	0.77582	1.1478	0.601136	EZH2
Estrogen receptor signaling pathway	1/20	0.592308	0.77582	1.1478	0.601136	GNB1
Gene expression regulation in pancreatic beta cells	1/20	0.592308	0.77582	1.1478	0.601136	NKX2-2
Golgi-associated vesicle biogenesis	1/20	0.592308	0.77582	1.1478	0.601136	HSPA8
Interleukin-3 regulation of hematopoietic cells	1/20	0.592308	0.77582	1.1478	0.601136	TNF
Peroxisomal lipid metabolism	1/20	0.592308	0.77582	1.1478	0.601136	AMACR
Signaling by Hippo	1/20	0.592308	0.77582	1.1478	0.601136	YWHAB
Urea cycle and metabolism of amino groups	1/20	0.592308	0.77582	1.1478	0.601136	PYCR1
Defensins	2/45	0.592984	0.77582	1.01422	0.530019	DEFB105A;DEFA4
Interleukin-12/STAT4 pathway	2/45	0.592984	0.77582	1.01422	0.530019	CD3D;ETV5
RhoA signaling pathway	2/45	0.592984	0.77582	1.01422	0.530019	ACTA1;RHOA
Wnt interactions in lipid metabolism and immune response	2/45	0.592984	0.77582	1.01422	0.530019	IL32;CDC25B
Prolactin regulation of apoptosis	5/118	0.594578	0.776915	0.964622	0.50151	PSMA4;HSPA5;WT1;SOCS7;RBX1
Cell surface interactions at the vascular wall	4/94	0.595234	0.776915	0.96897	0.502702	PPIL2;ITGAV;FYN;CD47
Hedgehog signaling pathway	3/70	0.597853	0.779407	0.976263	0.5022	FBXW11;KIF3A;BOC
Transfer RNA aminoacylation	2/46	0.605028	0.784343	0.991117	0.498017	MARS2;EARS2
Phase II of biological oxidations: conjugation	3/71	0.607521	0.784343	0.961856	0.479359	SULT1A1;NAT1;SULT1A2
APC/C activator regulation between G1/S and early anaphase	1/21	0.610203	0.784343	1.09035	0.538595	ANAPC5
CD28-dependent PI3K/Akt signaling	1/21	0.610203	0.784343	1.09035	0.538595	FYN
Cytosolic sensors of pathogen-associated DNA	1/21	0.610203	0.784343	1.09035	0.538595	NFKB2
IGF1 signaling pathway	1/21	0.610203	0.784343	1.09035	0.538595	RASA1
Mitochondrial role in apoptotic signaling	1/21	0.610203	0.784343	1.09035	0.538595	ENDOG
Nicotine activity on dopaminergic neurons	1/21	0.610203	0.784343	1.09035	0.538595	GNB1
Presynaptic function of kainate receptors	1/21	0.610203	0.784343	1.09035	0.538595	GNB1
Prion pathway	1/21	0.610203	0.784343	1.09035	0.538595	HSPA5
T cell activation co-stimulatory signal	1/21	0.610203	0.784343	1.09035	0.538595	CD3D
Y branching of actin filaments	1/21	0.610203	0.784343	1.09035	0.538595	ACTA1
Actions of nitric oxide in the heart	2/47	0.616801	0.78851	0.969041	0.46825	ACTA1;GNB1
Delta Np63 pathway	2/47	0.616801	0.78851	0.969041	0.46825	CCNB2;TCF7L1
Regulation of NFAT transcription factors	2/47	0.616801	0.78851	0.969041	0.46825	GATA3;TNF
Cyclin A-Cdk2-associated events at S phase entry	3/72	0.617033	0.78851	0.947866	0.457661	PSMA4;PSME1;CDC25B
Leishmaniasis	3/72	0.617033	0.78851	0.947866	0.457661	MAPK11;IRAK1;TNF
Degradation of beta-catenin by the destruction complex	3/73	0.626387	0.796094	0.934276	0.437042	PSMA4;PSME1;RBX1
BRCA1, BRCA2 and ATR roles in cancer susceptibility	1/22	0.627314	0.796094	1.03838	0.484204	TP53
CTLA4 inhibitory signaling	1/22	0.627314	0.796094	1.03838	0.484204	FYN
Fanconi anemia pathway	1/22	0.627314	0.796094	1.03838	0.484204	UBE2T
Nitric oxide signaling pathway	1/22	0.627314	0.796094	1.03838	0.484204	PRKCA
T cell receptor downstream signaling	1/22	0.627314	0.796094	1.03838	0.484204	RIPK2
Fatty acid, triacylglycerol, and ketone body metabolism	7/173	0.639215	0.803218	0.918841	0.411194	MED12;HDAC3;ACSL5;NRF1;NPAS2;MED29;MED17
Arf6 integrin-mediated signaling pathway	2/49	0.639532	0.803218	0.927708	0.414703	ACAP1;ITGAV
Deadenylation-dependent mRNA decay	2/49	0.639532	0.803218	0.927708	0.414703	PAN2;CNOT6
G alpha 12 pathway	2/49	0.639532	0.803218	0.927708	0.414703	MAPK11;RHOA
BAD phosphorylation mediated by IGF1R signaling	1/23	0.643674	0.803218	0.991127	0.436654	ADCY1
Incretin biosynthesis, secretion, and inactivation	1/23	0.643674	0.803218	0.991127	0.436654	PCSK1
Interleukin-11 pathway	1/23	0.643674	0.803218	0.991127	0.436654	MUC1
Mitochondrial pathway of apoptosis: antiapoptotic Bcl-2 family	1/23	0.643674	0.803218	0.991127	0.436654	MAPK11
Post-elongation processing of intronless pre-mRNA	1/23	0.643674	0.803218	0.991127	0.436654	PCF11
Proximal tubule bicarbonate reclamation	1/23	0.643674	0.803218	0.991127	0.436654	FXYD2
Rho cell motility signaling pathway	1/23	0.643674	0.803218	0.991127	0.436654	RHOA
Signaling by bone morphogenetic protein (BMP)	1/23	0.643674	0.803218	0.991127	0.436654	ACVR2A
Signaling events mediated by the hedgehog family	1/23	0.643674	0.803218	0.991127	0.436654	BOC
Visual signal transduction: cones	1/23	0.643674	0.803218	0.991127	0.436654	RGS9
Pyrimidine metabolism	4/100	0.643976	0.803218	0.908123	0.399659	POLA2;DUT;CTPS2;UCKL1
Arrhythmogenic right ventricular cardiomyopathy (ARVC)	3/75	0.644621	0.803218	0.908228	0.398797	CACNB2;TCF7L1;ITGAV
Interleukin-1 signaling pathway	5/125	0.645483	0.803381	0.908018	0.397491	MAPK11;IRAK1;RIPK2;UBE2T;RBX1
Phosphatidylinositol metabolism	2/50	0.650493	0.808702	0.908333	0.390605	PI4KA;MTMR4
Lipid and lipoprotein metabolism	20/489	0.658212	0.813231	0.928214	0.388206	CERS3;CDS1;HDAC3;SLC44A1;PLA2G4B;PLA2G4C;ACSL5;MSMO1;NRF1;MTMR4;CYP19A1;CYP8B1;MED29;NPAS2;MED17;MED12;AMACR;FABP6;PI4KA;DHCR7
Spliceosome	5/127	0.659266	0.813231	0.893038	0.372065	HSPA8;PPIL1;DDX39B;PRPF3;HSPA2
Plexin D1 signaling	1/24	0.659317	0.813231	0.947985	0.394884	ITGAV
Proteasome complex	1/24	0.659317	0.813231	0.947985	0.394884	PSMA4
Protein export	1/24	0.659317	0.813231	0.947985	0.394884	HSPA5
Signal transduction of S1P receptor	1/24	0.659317	0.813231	0.947985	0.394884	S1PR3
Tumor suppressor Arf inhibits ribosomal biogenesis	1/24	0.659317	0.813231	0.947985	0.394884	TP53
Integrated breast cancer pathway	6/152	0.660616	0.813421	0.895381	0.371209	BLM;TPR;RHO;TP53;CYP19A1;CDC25B
Amyloids	2/51	0.661188	0.813421	0.889749	0.368104	CALCA;SNCA
G alpha (12/13) signaling events	3/77	0.662216	0.813421	0.883589	0.364184	TBXA2R;GNB1;RHOA
Apoptosis regulation	3/78	0.670773	0.813421	0.871762	0.348116	PSMA4;PSME1;TP53
Peroxisome	3/78	0.670773	0.813421	0.871762	0.348116	PRDX5;AMACR;ACSL5
Signaling by SCF-KIT	3/78	0.670773	0.813421	0.871762	0.348116	YWHAB;PRKCA;FYN
Drug metabolism: other enzymes	2/52	0.671618	0.813421	0.871909	0.347077	NAT1;UCKL1
Phagosome	6/154	0.672925	0.813421	0.883188	0.34985	DYNC1H1;RAB5B;TUBA1B;TUBB;ITGAV;PLA2R1
Basigin interactions	1/25	0.674274	0.813421	0.908438	0.358033	PPIL2
Cellular response to hypoxia	1/25	0.674274	0.813421	0.908438	0.358033	RBX1
DARPP-32 events	1/25	0.674274	0.813421	0.908438	0.358033	PDE4D
Fatty acid biosynthesis	1/25	0.674274	0.813421	0.908438	0.358033	ACSL5
G0 and early G1 pathway	1/25	0.674274	0.813421	0.908438	0.358033	PCNA
IGF1 receptor signaling through beta-arrestin	1/25	0.674274	0.813421	0.908438	0.358033	MAPK11
Ligand-gated ion channel transport	1/25	0.674274	0.813421	0.908438	0.358033	HTR3A
Maturity onset diabetes of the young	1/25	0.674274	0.813421	0.908438	0.358033	NKX2-2
Phosphoinositides and their downstream targets	1/25	0.674274	0.813421	0.908438	0.358033	JAG1
RNA polymerase I transcription initiation	1/25	0.674274	0.813421	0.908438	0.358033	ERCC2
Regulatory RNA pathways	1/25	0.674274	0.813421	0.908438	0.358033	TARBP2
SHC1 events in ERBB2 signaling	1/25	0.674274	0.813421	0.908438	0.358033	YWHAB
Glycerophospholipid metabolism	3/79	0.67917	0.817533	0.860246	0.332815	CDS1;PLA2G4B;JMJD7-PLA2G4B
Signaling events mediated by hepatocyte growth factor receptor (c-Met)	3/79	0.67917	0.817533	0.860246	0.332815	HGF;RANBP10;RHOA
Apoptosis modulation and signaling	3/80	0.687407	0.819874	0.84903	0.31824	ENDOG;IRAK1;CASP2
ALK1 pathway	1/26	0.688575	0.819874	0.872055	0.325391	ACVR2A
Estrogen receptor transcription factor targets	1/26	0.688575	0.819874	0.872055	0.325391	HDAC3
Fibroblast growth factor 1	1/26	0.688575	0.819874	0.872055	0.325391	S1PR3
Galactose metabolism	1/26	0.688575	0.819874	0.872055	0.325391	GALK1
Integrin family cell surface interactions	1/26	0.688575	0.819874	0.872055	0.325391	ITGAV
RXR/VDR pathway	1/26	0.688575	0.819874	0.872055	0.325391	TNF
Ras signaling pathway	1/26	0.688575	0.819874	0.872055	0.325391	RHOA
Segmentation clock	1/26	0.688575	0.819874	0.872055	0.325391	HEY2
Termination of O-glycan biosynthesis	1/26	0.688575	0.819874	0.872055	0.325391	MUC1
Arginine and proline metabolism	2/54	0.691695	0.822698	0.838286	0.309	P4HA2;PYCR1
Adipogenesis	5/133	0.698499	0.826307	0.850908	0.305324	BSCL2;DDIT3;ID3;GATA3;TNF
Meiotic synapsis	2/55	0.701348	0.826307	0.822426	0.291756	DIDO1;HSPA2
Vibrio cholerae infection	2/55	0.701348	0.826307	0.822426	0.291756	ADCY3;PRKCA
ADP signalling through P2Y purinoceptor 12	1/27	0.702248	0.826307	0.83847	0.296373	GNB1
BAD phosphorylation regulation	1/27	0.702248	0.826307	0.83847	0.296373	ADCY1
CTCF pathway	1/27	0.702248	0.826307	0.83847	0.296373	TP53
Cooperation of prefoldin and TriC/CCT in actin and tubulin folding	1/27	0.702248	0.826307	0.83847	0.296373	TUBA1B
EGFR downregulation	1/27	0.702248	0.826307	0.83847	0.296373	AP2B1
Insulin regulation of blood glucose	1/27	0.702248	0.826307	0.83847	0.296373	YWHAB
RNA polymerase III transcription initiation from type 2 promoter	1/27	0.702248	0.826307	0.83847	0.296373	TBP
SMAD2/3 nuclear pathway	3/82	0.703404	0.826782	0.827448	0.291116	HSPA8;KAT2A;GATA3
Cell cycle: G1/S checkpoint	1/28	0.715322	0.834543	0.807374	0.270488	TP53
Dual incision reaction in TC-NER	1/28	0.715322	0.834543	0.807374	0.270488	ERCC2
G-protein activation	1/28	0.715322	0.834543	0.807374	0.270488	GNB1
Messenger RNA capping	1/28	0.715322	0.834543	0.807374	0.270488	ERCC2
Phosphatidic acid biosynthesis	1/28	0.715322	0.834543	0.807374	0.270488	PLA2G4B
RNA polymerase III transcription initiation From type 3 promoter	1/28	0.715322	0.834543	0.807374	0.270488	TBP
TGF-beta receptor activation of SMADs	1/28	0.715322	0.834543	0.807374	0.270488	MTMR4
Leptin influence on immune response	4/110	0.71621	0.834693	0.822019	0.274375	CCL19;TNF;CD3D;SNCA
GPCR ligand binding	16/410	0.719369	0.834945	0.883355	0.29096	GPR39;PTGFR;GABBR1;CALCA;FZD2;CCL21;HCRTR2;CXCL10;GRM2;TBXA2R;GNB1;RHO;ADORA1;NMUR1;S1PR3;CCL19
Inositol phosphate metabolism	2/57	0.719901	0.834945	0.792436	0.260428	PLCB4;PI4KA
SHP2 signaling	2/57	0.719901	0.834945	0.792436	0.260428	PDGFRB;RHOA
Integrin cell surface interactions	3/85	0.726216	0.834945	0.79705	0.254983	COL4A5;ICAM4;ITGAV
MicroRNAs in cardiomyocyte hypertrophy	3/85	0.726216	0.834945	0.79705	0.254983	FZD2;TNF;RHOA
Myc active pathway	3/85	0.726216	0.834945	0.79705	0.254983	KAT2A;ACTL6A;TP53
Adherens junction actin cytoskeletal organization	1/29	0.727823	0.834945	0.778498	0.247327	CDH3
Association of TriC/CCT with target proteins during biosynthesis	1/29	0.727823	0.834945	0.778498	0.247327	NOP56
Influence of Ras and Rho proteins on G1 to S transition	1/29	0.727823	0.834945	0.778498	0.247327	RHOA
Integrin beta-2 pathway	1/29	0.727823	0.834945	0.778498	0.247327	ICAM4
Pentose and glucuronate interconversions	1/29	0.727823	0.834945	0.778498	0.247327	RPE
Post-translational modification: biosynthesis of GPI-anchored proteins	1/29	0.727823	0.834945	0.778498	0.247327	PIGU
Reelin signaling pathway	1/29	0.727823	0.834945	0.778498	0.247327	FYN
Statin pathway	1/29	0.727823	0.834945	0.778498	0.247327	ACSS1
T cell receptor calcium pathway	1/29	0.727823	0.834945	0.778498	0.247327	RCAN2
Arachidonic acid metabolism	2/58	0.728807	0.835202	0.778245	0.246195	PLA2G4B;JMJD7-PLA2G4B
Interleukin-4 regulation of apoptosis	10/267	0.738559	0.839889	0.846696	0.256595	HSPA8;JAG1;RIPK2;MTHFR;ID3;CASP2;GATA3;TNF;NPAS2;DACT1
Apoptosis	9/242	0.739017	0.839889	0.840618	0.254232	ENDOG;PSMA4;IRAK1;YWHAB;PSME1;CASP2;TP53;TNF;PLEC
Butanoate metabolism	1/30	0.739775	0.839889	0.751614	0.226543	BDH2
CDC42 activity regulation	1/30	0.739775	0.839889	0.751614	0.226543	DOCK9
Gap junction trafficking and regulation	1/30	0.739775	0.839889	0.751614	0.226543	GJC2
Inflammatory response pathway	1/30	0.739775	0.839889	0.751614	0.226543	CD40
O-glycan biosynthesis	1/30	0.739775	0.839889	0.751614	0.226543	GALNT10
Ovarian infertility genes	1/30	0.739775	0.839889	0.751614	0.226543	CYP19A1
Tight junction interactions	1/30	0.739775	0.839889	0.751614	0.226543	CLDN10
RAGE pathway	2/60	0.745899	0.845968	0.75133	0.220264	ID3;TNF
Amino acid transport across the plasma membrane	1/31	0.751203	0.847704	0.726522	0.207843	SLC7A2
CD28 co-stimulation	1/31	0.751203	0.847704	0.726522	0.207843	FYN
Keratan sulfate/keratin metabolism	1/31	0.751203	0.847704	0.726522	0.207843	B4GALT4
PD-1 signaling	1/31	0.751203	0.847704	0.726522	0.207843	CD3D
Influenza infection	5/142	0.751286	0.847704	0.794633	0.22724	NUP205;NUP133;TPR;NUP62;RPL13
Cytochrome P450 pathway	2/61	0.754093	0.849128	0.738557	0.20845	CYP19A1;CYP8B1
Ion channel transport	2/61	0.754093	0.849128	0.738557	0.20845	FXYD2;HTR3A
Pancreatic beta-cell development regulation	1/32	0.76213	0.856422	0.703049	0.190975	NKX2-2
Sphingolipid de novo biosynthesis	1/32	0.76213	0.856422	0.703049	0.190975	CERS3
O-linked glycosylation of mucins	2/63	0.769799	0.863275	0.714267	0.18687	MUC1;GALNT10
Proteasome degradation	2/63	0.769799	0.863275	0.714267	0.18687	PSMA4;PSME1
Glucagon-type ligand receptors	1/33	0.772577	0.864625	0.681043	0.175725	GNB1
Negative regulators of RIG-I/MDA5 signaling	1/33	0.772577	0.864625	0.681043	0.175725	TRIM25
Interleukin-1 regulation of extracellular matrix	4/120	0.777056	0.867283	0.75076	0.189374	TNFAIP2;NR2F2;AMPD3;TNF
MAPK cascade role in angiogenesis	2/64	0.777319	0.867283	0.70271	0.177015	MAPK11;PRKCA
Validated nuclear estrogen receptor alpha network	2/64	0.777319	0.867283	0.70271	0.177015	PCNA;HSF2
Extracellular matrix organization	3/93	0.780318	0.867669	0.725896	0.180062	COLGALT2;COL4A6;COL4A5
EPO receptor signaling	1/34	0.782566	0.867669	0.660371	0.161908	RASA1
Fatty acid beta oxidation	1/34	0.782566	0.867669	0.660371	0.161908	ACSL5
Induction of apoptosis through DR3 and DR4/5 death receptors	1/34	0.782566	0.867669	0.660371	0.161908	ACTA1
MAPK/TRK pathway	1/34	0.782566	0.867669	0.660371	0.161908	TRPV1
N-cadherin signaling events	1/34	0.782566	0.867669	0.660371	0.161908	RHOA
Endocytosis	7/201	0.783192	0.867669	0.785063	0.191852	HSPA8;RAB5B;ACAP1;AP2B1;HSPA2;RAB22A;RHOA
Endochondral ossification	2/66	0.791716	0.872571	0.680679	0.158974	KIF3A;FGF18
Signaling by TGF-beta receptor complex	2/66	0.791716	0.872571	0.680679	0.158974	MTMR4;RHOA
Cytokines and inflammatory response	1/35	0.792116	0.872571	0.640915	0.149363	TNF
EGF receptor (ErbB1) signaling pathway	1/35	0.792116	0.872571	0.640915	0.149363	RASA1
PIK3C1/AKT pathway	1/35	0.792116	0.872571	0.640915	0.149363	YWHAB
Class B GPCRs (secretin family receptors)	3/95	0.79238	0.872571	0.710041	0.165237	CALCA;FZD2;GNB1
Phospholipid metabolism	7/205	0.799741	0.877938	0.769041	0.171856	CDS1;CERS3;SLC44A1;PLA2G4B;PLA2G4C;PI4KA;MTMR4
Generation of second messenger molecules	1/36	0.801248	0.877938	0.62257	0.137952	CD3D
Glycogen metabolism	1/36	0.801248	0.877938	0.62257	0.137952	GYG1
Ion transport by P-type ATPases	1/36	0.801248	0.877938	0.62257	0.137952	FXYD2
Steroid hormone, vitamin A, and vitamin D metabolism	1/36	0.801248	0.877938	0.62257	0.137952	CYP19A1
Downstream signaling events Of B cell receptor (BCR)	3/98	0.809434	0.884858	0.687511	0.145353	PSMA4;FBXW11;PSME1
Interleukin-23-mediated signaling events	1/37	0.809979	0.884858	0.605245	0.127553	TNF
PI3K/AKT activation	1/37	0.809979	0.884858	0.605245	0.127553	RHOA
Senescence and autophagy	3/99	0.81485	0.88605	0.680313	0.139295	KMT2A;TP53;CDC25B
AP-1 transcription factor network	2/70	0.818062	0.88605	0.640504	0.128624	ACTA1;TP53
Pancreatic cancer	2/70	0.818062	0.88605	0.640504	0.128624	E2F2;TP53
Renal cell carcinoma	2/70	0.818062	0.88605	0.640504	0.128624	HGF;RBX1
Cyclin D-associated events in G1	1/38	0.818327	0.88605	0.588856	0.118062	E2F2
ERBB4 signaling events	1/38	0.818327	0.88605	0.588856	0.118062	FYN
Nuclear receptors	1/38	0.818327	0.88605	0.588856	0.118062	NR2F2
Trefoil factor initiation of mucosal healing	1/38	0.818327	0.88605	0.588856	0.118062	RHOA
Triglyceride biosynthesis	1/38	0.818327	0.88605	0.588856	0.118062	ACSL5
Bacterial invasion of epithelial cells	2/71	0.824165	0.890307	0.631188	0.122062	ILK;RHOA
TNF-alpha signaling pathway	3/101	0.825291	0.890307	0.666359	0.127954	FBXW11;TNF;NFKB2
Angiotensin II-mediated activation of JNK pathway via Pyk2-dependent signaling	1/39	0.826308	0.890307	0.57333	0.109384	PRKCA
G13 signaling pathway	1/39	0.826308	0.890307	0.57333	0.109384	RHOA
Vitamin A and carotenoid metabolism	1/39	0.826308	0.890307	0.57333	0.109384	SULT1A1
Costimulation by the CD28 family	2/72	0.830083	0.893498	0.622139	0.115861	FYN;CD3D
Nuclear signaling by ErbB4	1/40	0.833939	0.896771	0.5586	0.101439	RBX1
Chronic myeloid leukemia	2/73	0.835821	0.897915	0.613344	0.109998	E2F2;TP53
Interleukin-4 signaling pathway	3/104	0.840005	0.901248	0.646464	0.112709	MAPK11;GATA3;SOCS5
Graft-versus-host disease	1/41	0.841236	0.901248	0.544606	0.0941533	TNF
E2F transcription factor network	2/74	0.841383	0.901248	0.604794	0.104453	KAT2A;E2F2
Prolactin activation of MAPK signaling	2/75	0.846774	0.905034	0.596477	0.0992071	RPS6KA2;FYN
Fatty acid metabolism	1/42	0.848212	0.905034	0.531295	0.0874644	ACSL5
Netrin-1 signaling	1/42	0.848212	0.905034	0.531295	0.0874644	FYN
TWEAK signaling pathway	1/42	0.848212	0.905034	0.531295	0.0874644	NFKB2
ERBB1 downstream pathway	3/106	0.84921	0.905219	0.633845	0.103602	CYFIP2;YWHAB;PRKCA
Cell differentiation by G alpha (i/o) pathway inferred from mouse Neuro2A model	1/43	0.854882	0.908622	0.518618	0.0813153	ILK
Cleavage of growing transcript in the termination region	1/43	0.854882	0.908622	0.518618	0.0813153	PCF11
Growth hormone receptor signaling	1/43	0.854882	0.908622	0.518618	0.0813153	PRKCA
Mitochondrial pathway of apoptosis: caspases	2/77	0.857058	0.910055	0.58051	0.0895433	CAPN10;HSPA2
Amino acid metabolism	6/195	0.861256	0.911872	0.690103	0.103076	PNMT;PCSK1;PSMA4;PSME1;PYCR1;AZIN1
HNF3A pathway	1/44	0.861259	0.911872	0.506531	0.0756556	NR2F2
Lysine degradation	1/44	0.861259	0.911872	0.506531	0.0756556	COLGALT2
Deposition of new CENP-A-containing nucleosomes at the centromere	1/45	0.867356	0.914802	0.494993	0.0704404	ITGB3BP
Interleukin-3 signaling pathway	1/45	0.867356	0.914802	0.494993	0.0704404	FYN
Interleukin-3, interleukin-5, and GM-CSF signaling	1/45	0.867356	0.914802	0.494993	0.0704404	FYN
RNA polymerase III transcription	1/45	0.867356	0.914802	0.494993	0.0704404	TBP
Class A GPCRs (rhodopsin-like)	8/253	0.870053	0.916768	0.709349	0.0987419	PTGFR;GPR39;TBXA2R;GPR161;RHO;ADORA1;NMUR1;HCRTR2
RhoA activity regulation	1/46	0.873185	0.919186	0.483968	0.0656296	RHOA
Respiratory electron transport, ATP biosynthesis by chemiosmotic coupling, and heat production by uncoupling proteins	2/81	0.875757	0.921011	0.551002	0.0730995	NDUFB7;UQCR11
ABC transporters	1/47	0.878759	0.922403	0.473422	0.0611873	ABCC2
Agrin in postsynaptic differentiation	1/47	0.878759	0.922403	0.473422	0.0611873	ACTA1
ATM-dependent DNA damage response	2/82	0.880066	0.922893	0.544086	0.0695116	TP53;RHOA
HES/HEY pathway	1/48	0.884088	0.923586	0.463325	0.0570811	HEY2
Intestinal immune network for IgA production	1/48	0.884088	0.923586	0.463325	0.0570811	CD40
Post-translational regulation of adherens junction stability and disassembly	1/48	0.884088	0.923586	0.463325	0.0570811	FYN
Presenilin action in Notch and Wnt signaling	1/48	0.884088	0.923586	0.463325	0.0570811	FBXW11
Amino acid and oligopeptide SLC transporters	1/49	0.889183	0.92539	0.453648	0.0532822	SLC7A2
Ceramide signaling pathway	1/49	0.889183	0.92539	0.453648	0.0532822	TNF
FoxO family signaling	1/49	0.889183	0.92539	0.453648	0.0532822	YWHAB
Glycerolipid metabolism	1/49	0.889183	0.92539	0.453648	0.0532822	AKR1A1
Type 2 diabetes mellitus	1/50	0.894054	0.928701	0.444367	0.0497643	TNF
Type II interferon signaling (interferon-gamma)	1/50	0.894054	0.928701	0.444367	0.0497643	CXCL10
Immunoregulatory interactions between a lymphoid and a non-lymphoid cell	3/119	0.898494	0.931123	0.562426	0.0601994	CD40;ICAM4;CD3D
Transcription	5/181	0.902867	0.931123	0.617279	0.0630732	GTF2A1;TBP;PCF11;ERCC2;TAF1
Androgen receptor signaling, proteolysis, and transcription regulation	2/88	0.903143	0.931123	0.505967	0.0515448	ETV5;RHOA
Hematopoietic cell lineage	2/88	0.903143	0.931123	0.505967	0.0515448	CD3D;TNF
Apoptotic execution phase	1/52	0.903164	0.931123	0.426896	0.0434799	PLEC
Interleukin-2 receptor beta chain in T cell activation	1/52	0.903164	0.931123	0.426896	0.0434799	PCNA
Pyruvate metabolism	1/52	0.903164	0.931123	0.426896	0.0434799	ACSS1
Signaling events mediated by stem cell factor receptor (c-Kit)	1/52	0.903164	0.931123	0.426896	0.0434799	MAP4K1
JNK/MAPK pathway	1/53	0.907421	0.934635	0.418664	0.0406726	TP53
Kit receptor signaling pathway	1/54	0.911491	0.937071	0.410744	0.0380648	PRKCA
RANKL signaling pathway	1/54	0.911491	0.937071	0.410744	0.0380648	NFKB2
RNA polymerase I transcription	1/55	0.915383	0.939315	0.403116	0.0356406	ERCC2
TAp63 pathway	1/55	0.915383	0.939315	0.403116	0.0356406	JAG1
Signaling by ERBB4	2/93	0.919135	0.942285	0.478041	0.0403093	YWHAB;RBX1
ERBB signaling pathway	2/94	0.92202	0.94326	0.47282	0.0383873	PRKCA;TP53
Fc gamma receptor-mediated phagocytosis	2/94	0.92202	0.94326	0.47282	0.0383873	PLA2G4B;PRKCA
Acute myeloid leukemia	1/57	0.922661	0.94326	0.388678	0.0312861	TCF7L1
RNA polymerase I, RNA polymerase III, and mitochondrial transcription	2/95	0.924808	0.9437	0.467711	0.0365604	TBP;ERCC2
Transport of inorganic cations/anions and amino acids/oligopeptides	2/95	0.924808	0.9437	0.467711	0.0365604	SLC34A1;SLC7A2
Tryptophan metabolism	1/58	0.926062	0.944102	0.381839	0.0293308	CYP19A1
Peptide G-protein coupled receptors	5/192	0.927428	0.944619	0.580631	0.0437447	CXCL10;CCL21;NMUR1;CCL19;HCRTR2
TSH regulation of gene expression	2/97	0.930105	0.946073	0.457817	0.0331726	ADCY3;S100A4
Parkinson's disease	3/131	0.930577	0.946073	0.509377	0.0366497	NDUFB7;UQCR11;SNCA
Natural killer cell receptor signaling pathway	1/60	0.932422	0.947072	0.368857	0.0258089	MAPK11
Signaling by GPCR	34/977	0.936725	0.950564	0.777559	0.0508256	OR2A1;PTGFR;CALCA;YWHAB;ITPR1;ADCY3;ITPR3;ADCY1;ADCY6;GRM2;TBXA2R;RPS6KA2;ADORA1;RHO;S1PR3;CCL19;RGS9;GPR39;OR4D1;GABBR1;PRKCH;FZD2;CCL21;PDE4D;PRKCA;HCRTR2;RHOA;CXCL10;PLCB4;OR5AC2;GNB1;OR2A12;NMUR1;OR2A14
Electron transport chain	2/105	0.94796	0.961078	0.42208	0.0225572	NDUFB7;UQCR11
Epithelial cell signaling in Helicobacter pylori infection	1/68	0.952847	0.964874	0.324678	0.0156824	MAPK11
Cytoplasmic ribosomal proteins	2/108	0.953461	0.964874	0.41007	0.0195427	RPS6KA2;RPL13
Interleukin-6 signaling pathway	1/71	0.958801	0.968495	0.310714	0.0130723	MAPK11
Rac1 cell motility signaling pathway	1/71	0.958801	0.968495	0.310714	0.0130723	CYFIP2
Sphingolipid metabolism	1/72	0.960614	0.969435	0.306322	0.0123088	CERS3
Cap-dependent translation initiation	1/73	0.962347	0.970293	0.302052	0.0115927	RPL13
Lysosome	2/121	0.971494	0.978618	0.365023	0.0105564	AP4E1;AP1S1
Rho GTPase cycle	2/123	0.973586	0.979827	0.358952	0.00960865	MYO9A;RHOA
Drug metabolism: cytochrome P450	1/83	0.975995	0.981353	0.265077	0.00644073	ALDH3A1
Non-class A, B, C GPCRs	1/86	0.979028	0.983503	0.255681	0.00541905	PTGFR
Oxidative phosphorylation	2/136	0.983981	0.987575	0.323906	0.00523073	NDUFB7;UQCR11
Systemic lupus erythematosus	2/139	0.985742	0.98844	0.316763	0.00454896	CD40;TNF
Influenza viral RNA transcription and replication	1/125	0.996383	0.9982	0.174906	0.000633723	RPL13
Olfactory transduction	8/432	0.998793	0.99888	0.405997	0.000490166	OR2A1;OR4D1;OR5AC2;GNB1;ADCY3;OR2A12;OR2A42;OR2A14
Translation	1/151	0.99888	0.99888	0.144391	0.000161793	RPL13

## Sheet: KEGG
Term	Overlap	P-value	Adjusted p-value	Odds Ratio	Combined Score	Genes
Vascular smooth muscle contraction	20/133	1.40325e-06	0.000404135	3.92602	52.9099	GUCY1A1;CALCA;PRKCH;PLA2G4B;PLA2G4C;IRAG1;ITPR1;ADCY3;PRKCA;ITPR3;ADCY1;RHOA;ADCY6;ACTA2;PLCB4;KCNMB1;JMJD7-PLA2G4B;MYH9;MYH11;MYL9
Glutamatergic synapse	16/114	3.74735e-05	0.00539619	3.60758	36.768	PLA2G4B;PLA2G4C;ITPR1;ADCY3;PRKCA;ITPR3;GRIK1;ADCY1;ADCY6;GRM2;PLCB4;JMJD7-PLA2G4B;GNB1;HOMER3;GRIA3;GRIA4
Circadian entrainment	14/97	8.28895e-05	0.00751518	3.7214	34.9737	GUCY1A1;ITPR1;ADCY3;PRKCA;ITPR3;ADCY1;CACNA1H;RYR3;ADCY6;CACNA1I;PLCB4;GNB1;GRIA3;GRIA4
MAPK signaling pathway	28/294	0.000104377	0.00751518	2.33798	21.4334	PTPRR;TNF;CACNA1H;FGF4;CACNA1I;FGF7;IRAK1;RPS6KA2;MKNK1;STMN1;FLNB;MAP4K1;PDGFRB;HSPA8;HGF;PLA2G4B;PLA2G4C;PRKCA;HSPA2;CDC25B;NFKB2;CACNB2;MAPK11;DDIT3;JMJD7-PLA2G4B;RASA1;FGF18;TP53
Oxytocin signaling pathway	18/154	0.000145609	0.00838707	2.92548	25.8454	GUCY1A1;PRKAA1;CAMK1D;PLA2G4B;PLA2G4C;ITPR1;ADCY3;PRKCA;ITPR3;ADCY1;PRKAB1;RYR3;RHOA;ADCY6;CACNB2;PLCB4;JMJD7-PLA2G4B;MYL9
Inflammatory mediator regulation of transient receptor potential (TRP) channels	13/98	0.000346356	0.0143839	3.37002	26.8524	PRKCH;PLA2G4B;PLA2G4C;ITPR1;ADCY3;PRKCA;ITPR3;TRPV1;ADCY1;ADCY6;MAPK11;PLCB4;JMJD7-PLA2G4B
Platelet activation	15/124	0.000349608	0.0143839	3.03551	24.1587	GUCY1A1;PLA2G4B;PLA2G4C;ITPR1;ADCY3;ITPR3;ADCY1;RHOA;ADCY6;MAPK11;PLCB4;TBXA2R;JMJD7-PLA2G4B;ORAI1;FYN
Cortisol synthesis and secretion	10/65	0.000500248	0.0180089	3.99874	30.3921	CACNA1I;PLCB4;ITPR1;ORAI1;ADCY3;ITPR3;ADCY1;ADCY6;CACNA1H;CREB5
Parathyroid hormone synthesis, secretion and action	13/106	0.00074398	0.0238074	3.07883	22.1783	SLC34A1;PDE4D;ITPR1;ADCY3;PRKCA;ITPR3;GATA3;ADCY1;RHOA;ADCY6;PLCB4;NACA;CREB5
Long-term depression	9/60	0.00113956	0.0311489	3.87747	26.2781	GUCY1A1;PLCB4;PLA2G4B;JMJD7-PLA2G4B;PLA2G4C;ITPR1;PRKCA;ITPR3;GRIA3
Aldosterone synthesis and secretion	12/98	0.00118972	0.0311489	3.0709	20.6795	CACNA1I;CAMK1D;PLCB4;ITPR1;ORAI1;ADCY3;PRKCA;ITPR3;ADCY1;CACNA1H;ADCY6;CREB5
Thyroid hormone synthesis	10/75	0.00156307	0.032663	3.38178	21.85	PLCB4;HSPA5;FXYD2;ITPR1;ADCY3;PRKCA;ITPR3;ADCY1;ADCY6;CREB5
Ovarian steroidogenesis	8/51	0.00157961	0.032663	4.08489	26.3499	PLA2G4B;JMJD7-PLA2G4B;PLA2G4C;HSD17B2;ADCY3;ADCY1;CYP19A1;ADCY6
Gap junction	11/88	0.00158779	0.032663	3.14187	20.2506	PDGFRB;TUBA1B;GUCY1A1;PLCB4;TUBB;ITPR1;ADCY3;PRKCA;ITPR3;ADCY1;ADCY6
GnRH signaling pathway	11/93	0.00248251	0.0446852	2.94952	17.6926	MAPK11;PLCB4;PLA2G4B;JMJD7-PLA2G4B;PLA2G4C;ITPR1;ADCY3;PRKCA;ITPR3;ADCY1;ADCY6
Salivary secretion	11/93	0.00248251	0.0446852	2.94952	17.6926	GUCY1A1;PLCB4;DMBT1;FXYD2;ITPR1;ADCY3;PRKCA;ITPR3;ADCY1;RYR3;ADCY6
Insulin secretion	10/86	0.00434104	0.0735423	2.89064	15.724	SNAP25;PLCB4;KCNMB1;FXYD2;ADCY3;PRKCA;ITPR3;ADCY1;ADCY6;CREB5
Human cytomegalovirus infection	19/225	0.0049467	0.0791472	2.03353	10.7961	IFNA4;IFNA17;ITPR1;ADCY3;PRKCA;ITPR3;ADCY1;TNF;RHOA;ADCY6;TAPBP;MAPK11;PLCB4;GNB1;E2F2;ITGAV;TP53;IFNA10;CREB5
cGMP-PKG signaling pathway	15/167	0.00680158	0.0983409	2.17185	10.8389	GUCY1A1;IRAG1;ITPR1;ADCY3;ITPR3;ADCY1;RHOA;ADCY6;PLCB4;KCNMB1;FXYD2;ADORA1;PDE5A;MYL9;CREB5
Ras signaling pathway	19/232	0.00682923	0.0983409	1.96598	9.80343	PDGFRB;RAB5B;RASA4B;HGF;PLA2G4B;PLA2G4C;PRKCA;RASAL2;RHOA;BUB1B-PAK6;FGF4;RASSF1;FGF7;RASA4;JMJD7-PLA2G4B;RASA1;FGF18;GNB1;PLA1A
Apelin signaling pathway	13/137	0.0072594	0.0995575	2.30536	11.355	PRKAA1;JAG1;ITPR1;ADCY3;ITPR3;NRF1;ADCY1;PRKAB1;RYR3;ADCY6;ACTA2;PLCB4;GNB1
Cushing syndrome	14/155	0.00834697	0.109269	2.18394	10.452	TCF7L1;FZD2;KMT2A;ITPR1;ADCY3;ITPR3;ADCY1;CACNA1H;ADCY6;CACNA1I;PLCB4;ORAI1;E2F2;CREB5
Calcium signaling pathway	19/240	0.00965456	0.119849	1.89401	8.78881	PDGFRB;PTGFR;CAMK1D;TNNC1;HGF;ITPR1;ADCY3;PRKCA;ITPR3;ADCY1;RYR3;CACNA1H;FGF4;CACNA1I;FGF7;PLCB4;TBXA2R;FGF18;ORAI1
Phosphatidylinositol signaling system	10/97	0.010049	0.119849	2.5237	11.6097	CDS1;PLCB4;PPIP5K1;ITPR1;PI4KA;PRKCA;ITPR3;MTMR4;IP6K1;IP6K2
Circadian rhythm	5/31	0.0105483	0.119849	4.21158	19.1702	PRKAA1;FBXW11;PRKAB1;NPAS2;RBX1
Oocyte meiosis	12/129	0.0112359	0.119849	2.25356	10.1154	CCNB2;MAPK11;FBXW11;YWHAB;RPS6KA2;ITPR1;ADCY3;ANAPC5;ITPR3;ADCY1;ADCY6;RBX1
Purine metabolism	12/129	0.0112359	0.119849	2.25356	10.1154	DGUOK;GUCY1A1;GUK1;PDE4D;ADCY3;PDE5A;AMPD3;ADCY1;PDE6A;PFAS;ADCY6;APRT
Human immunodeficiency virus 1 infection	17/212	0.012327	0.126792	1.91876	8.4348	IFNA4;FBXW11;IFNA17;ITPR1;PRKCA;ITPR3;CD3D;TNF;BUB1B-PAK6;RBX1;TAPBP;CCNB2;MAPK11;IRAK1;GNB1;AP1S1;IFNA10
Phospholipase D signaling pathway	13/148	0.0134108	0.130273	2.11629	9.12479	PDGFRB;PTGFR;PLA2G4B;PLA2G4C;ADCY3;PRKCA;ADCY1;RHOA;ADCY6;GRM2;PLCB4;JMJD7-PLA2G4B;FYN
Lipid and atherosclerosis	17/215	0.0140092	0.130273	1.88939	8.06398	IFNA4;HSPA8;CD40;HSPA5;IFNA17;ITPR1;PRKCA;HSPA2;TNF;RHOA;PYCARD;MAPK11;PLCB4;IRAK1;DDIT3;TP53;IFNA10
Pancreatic secretion	10/102	0.0140225	0.130273	2.38591	10.1809	PLCB4;FXYD2;ITPR1;ADCY3;PRKCA;ITPR3;ADCY1;RAB8A;RHOA;ADCY6
Mannose type O-glycan biosynthesis	4/23	0.0167103	0.150393	4.60698	18.8505	B3GAT2;LARGE1;FUT4;FKTN
Gastric acid secretion	8/76	0.0180165	0.157235	2.57971	10.3613	PLCB4;ITPR1;ADCY3;KCNJ16;PRKCA;ITPR3;ADCY1;ADCY6
GnRH secretion	7/64	0.0216037	0.182996	2.69131	10.3209	CACNA1I;GABBR1;PLCB4;ITPR1;PRKCA;ITPR3;CACNA1H
Relaxin signaling pathway	11/129	0.0265075	0.213945	2.04579	7.42688	ACTA2;MAPK11;PLCB4;GNB1;COL4A6;COL4A5;ADCY3;PRKCA;ADCY1;ADCY6;CREB5
Cholinergic synapse	10/113	0.0267432	0.213945	2.12988	7.71329	PLCB4;GNB1;ITPR1;ADCY3;PRKCA;ITPR3;FYN;ADCY1;ADCY6;CREB5
Fc epsilon RI signaling pathway	7/68	0.0290602	0.219927	2.5143	8.89657	MAPK11;PLA2G4B;JMJD7-PLA2G4B;PLA2G4C;PRKCA;FYN;TNF
Axon guidance	14/182	0.0297534	0.219927	1.83034	6.4333	NTNG1;SEMA6C;SEMA7A;ILK;PRKCA;RHOA;BUB1B-PAK6;DPYSL2;RASA1;BOC;FYN;EPHA1;MYL9;EPHB3
Retrograde endocannabinoid signaling	12/148	0.0297818	0.219927	1.93679	6.80561	MAPK11;PLCB4;NDUFB7;GNB1;ITPR1;ADCY3;PRKCA;ITPR3;ADCY1;GRIA3;ADCY6;GRIA4
Renin secretion	7/69	0.031165	0.224388	2.47362	8.57965	GUCY1A1;PLCB4;ADORA1;ITPR1;ORAI1;ITPR3;ADCY6
Phototransduction	4/28	0.0325419	0.227931	3.64624	12.4892	GNB1;RHO;PDE6A;RGS9
RIG-I-like receptor signaling pathway	7/70	0.0333696	0.227931	2.43423	8.27664	IFNA4;CXCL10;MAPK11;IFNA17;TRIM25;TNF;IFNA10
Longevity regulating pathway	9/102	0.0350798	0.227931	2.12167	7.10789	HSPA8;PRKAA1;ADCY3;HSPA2;ADCY1;PRKAB1;TP53;ADCY6;CREB5
Tight junction	13/169	0.0353378	0.227931	1.82938	6.11525	PRKAA1;PCNA;PRKAB1;TJAP1;RHOA;CLDN10;TUBA1B;MARVELD2;SYMPK;MYH9;MYH11;MYL9;RAB8A
Selenocompound metabolism	3/17	0.036092	0.227931	4.68511	15.5625	MARS2;SCLY;SEPHS1
Sphingolipid signaling pathway	10/119	0.0364056	0.227931	2.012	6.66582	CERS3;MAPK11;PLCB4;ADORA1;PRKCA;FYN;S1PR3;TNF;TP53;RHOA
Melanoma	7/72	0.0380846	0.229267	2.35908	7.70934	PDGFRB;FGF7;HGF;FGF18;E2F2;TP53;FGF4
Porphyrin and chlorophyll metabolism	5/43	0.0389696	0.229267	2.8798	9.34487	HEPH;EPRS1;FXN;EARS2;HMOX2
Toll-like receptor signaling pathway	9/104	0.0390073	0.229267	2.07679	6.73712	CXCL10;IFNA4;MAPK11;CD40;IRAK1;IFNA17;TLR7;TNF;IFNA10
Thyroid hormone signaling pathway	10/121	0.0401039	0.230998	1.97554	6.35389	MED12;KAT2A;PLCB4;HDAC3;FXYD2;RCAN2;PRKCA;ITGAV;TP53;MED17
GABAergic synapse	8/89	0.0413823	0.233688	2.1642	6.89277	GABBR1;GNB1;ADCY3;PRKCA;ADCY1;SLC6A1;ADCY6;TRAK2
Vasopressin-regulated water reabsorption	5/44	0.0424407	0.235056	2.80581	8.86537	DYNC1H1;RAB5B;ADCY3;ADCY6;CREB5
Notch signaling pathway	6/59	0.0439361	0.237654	2.47861	7.7457	PTCRA;HEYL;KAT2A;JAG1;HEY2;DTX3
Basal transcription factors	5/45	0.0460921	0.237654	2.73552	8.41751	TAF7L;GTF2A1;TBP;ERCC2;TAF1
Cell cycle	10/124	0.0461218	0.237654	1.92325	5.91681	CCNB2;ORC4;PCNA;YWHAB;BUB1B;E2F2;ANAPC5;TP53;CDC25B;RBX1
Morphine addiction	8/91	0.0462105	0.237654	2.11183	6.49293	GABBR1;PDE4D;GNB1;ADORA1;ADCY3;PRKCA;ADCY1;ADCY6
Herpes simplex virus 1 infection	30/498	0.0497079	0.24801	1.41185	4.23779	ZNF133;ZNF671;IFNA4;ZNF250;TNF;ZFP30;ZNF805;IRAK1;ZNF606;ZNF700;ZNF248;ZNF688;ZNF585B;ZNF684;ZNF585A;ZNF540;ZNF141;IFNA17;ZNF10;TAPBP;ZNF419;ZNF616;ZNF30;ZNF74;ZNF613;ZNF337;ZNF114;TP53;ZNF333;IFNA10
Thermogenesis	16/232	0.0499464	0.24801	1.62662	4.87466	COA3;PRKAA1;SMARCC2;NDUFB7;ACTL6A;ACSL5;ADCY3;SIRT6;UQCR11;ADCY1;PRKAB1;ATP5F1D;ADCY6;MAPK11;RPS6KA2;CREB5
Pathogenic Escherichia coli infection	14/197	0.052085	0.254245	1.67898	4.96119	CYFIP2;TUBB;TNF;RHOA;PYCARD;CLDN10;MAPK11;TUBA1B;MYO1C;IRAK1;MYH9;MYH11;FYN;SEC24C
Hepatitis B	12/162	0.0532895	0.25579	1.75473	5.14489	IFNA4;MAPK11;PCNA;IRAK1;YWHAB;IFNA17;E2F2;PRKCA;TNF;TP53;IFNA10;CREB5
Antigen processing and presentation	7/78	0.0547674	0.258574	2.15904	6.27128	HSPA8;HSPA5;RFX5;PSME1;HSPA2;TNF;TAPBP
Prion disease	18/273	0.0563641	0.26182	1.55048	4.45905	HSPA8;NDUFB7;HSPA5;TUBB;ITPR1;UQCR11;ITPR3;HSPA2;ATP5F1D;TNF;RYR3;MAPK11;TUBA1B;PSMA4;KIF5C;DDIT3;FYN;CREB5
Breast cancer	11/147	0.0588845	0.263314	1.77334	5.02242	HEYL;FGF7;TCF7L1;FZD2;JAG1;FGF18;HEY2;E2F2;TP53;FGF4;NFKB2
Human T-cell leukemia virus 1 infection	15/219	0.0590835	0.263314	1.61381	4.56515	CD40;TBP;ADCY3;BUB1B;ADCY1;CD3D;TNF;ADCY6;NFKB2;CCNB2;KAT2A;E2F2;ANAPC5;TP53;CREB5
Dilated cardiomyopathy	8/96	0.059844	0.263314	1.99132	5.60758	CACNB2;TNNC1;TPM2;ADCY3;ITGAV;ADCY1;TNF;ADCY6
Serotonergic synapse	9/113	0.0603428	0.263314	1.89617	5.3239	PLCB4;PLA2G4B;JMJD7-PLA2G4B;GNB1;PLA2G4C;ITPR1;PRKCA;ITPR3;HTR3A
Dopaminergic synapse	10/132	0.0650542	0.279636	1.79638	4.90866	MAPK11;PLCB4;KIF5C;GNB1;ITPR1;PRKCA;ITPR3;GRIA3;GRIA4;CREB5
Adrenergic signaling in cardiomyocytes	11/150	0.066075	0.279847	1.73479	4.71337	CACNB2;MAPK11;PLCB4;TPM2;FXYD2;TNNC1;ADCY3;PRKCA;ADCY1;ADCY6;CREB5
Progesterone-mediated oocyte maturation	8/100	0.0723976	0.300247	1.90434	4.99999	CCNB2;MAPK11;RPS6KA2;ADCY3;ANAPC5;ADCY1;ADCY6;CDC25B
Long-term potentiation	6/67	0.0729767	0.300247	2.15264	5.63479	PLCB4;RPS6KA2;ITPR1;PRKCA;ITPR3;ADCY1
Shigellosis	16/246	0.0757859	0.301021	1.52648	3.93807	CAST;FNBP1;RIPK2;FBXW11;CALCOCO2;ITPR1;ILK;ITPR3;TNF;RHOA;RBX1;PYCARD;MAPK11;PLCB4;MYL9;TP53
Aldosterone-regulated sodium reabsorption	4/37	0.0773691	0.301021	2.65056	6.78323	HSD11B2;FXYD2;SCNN1A;PRKCA
Mismatch repair	3/23	0.0775713	0.301021	3.27855	8.3818	PCNA;RPA2;MLH3
Growth hormone synthesis, secretion and action	9/119	0.0780527	0.301021	1.79218	4.57071	MAPK11;PLCB4;ITPR1;ADCY3;PRKCA;ITPR3;ADCY1;ADCY6;CREB5
Estrogen signaling pathway	10/137	0.0790985	0.301021	1.7252	4.37694	HSPA8;GABBR1;PLCB4;ITPR1;ADCY3;ITPR3;HSPA2;ADCY1;ADCY6;CREB5
Amyotrophic lateral sclerosis	22/364	0.0809355	0.301021	1.41302	3.55248	NUP205;DNAH1;NDUFB7;HSPA5;NUP133;TUBB;UQCR11;ITPR3;ATP5F1D;TNF;TOMM40L;MAPK11;TUBA1B;PSMA4;KIF5C;DDIT3;TPR;NUP62;NEFM;TP53;RAB8A;PRPH
Endocrine and other factor-regulated calcium reabsorption	5/53	0.081816	0.301021	2.27865	5.70409	PLCB4;FXYD2;PRKCA;AP2B1;ADCY6
Glycosaminoglycan biosynthesis	5/53	0.081816	0.301021	2.27865	5.70409	GLCE;DSE;B3GALT6;HS6ST2;B4GALT4
Taste transduction	7/86	0.0831566	0.301021	1.93959	4.82382	GABBR1;PLCB4;SCNN1A;TAS2R14;HTR3A;ITPR3;ADCY6
Primary immunodeficiency	4/38	0.083617	0.301021	2.57247	6.3836	CD40;RFX5;ORAI1;CD3D
Fanconi anemia pathway	5/54	0.087084	0.309632	2.23203	5.44811	BLM;WDR48;CENPX;UBE2T;RPA2
alpha-Linolenic acid metabolism	3/25	0.0945584	0.331672	2.98019	7.02888	PLA2G4B;JMJD7-PLA2G4B;PLA2G4C
Non-small cell lung cancer	6/72	0.0955861	0.331672	1.98904	4.66973	RASSF1;KIF5C;HGF;E2F2;PRKCA;TP53
Hypertrophic cardiomyopathy	7/90	0.100003	0.342866	1.84573	4.2499	CACNB2;PRKAA1;TNNC1;TPM2;ITGAV;TNF;PRKAB1
NOD-like receptor signaling pathway	12/181	0.101584	0.34399	1.55589	3.55812	PYCARD;IFNA4;MAPK11;PLCB4;RIPK2;IFNA17;DEFA4;ITPR1;ITPR3;TNF;RHOA;IFNA10
[truncated: 203 more rows]

## Sheet: GO Biological Processes
Term	Overlap	P-value	Adjusted p-value	Odds Ratio	Combined Score	Genes
[truncated: 3,034 more rows]

[truncated: 2 more sheets: GO Cellular Compartments, GO Molecular Functions]
