# Supplementary material for: Transcriptome of Subcutaneous Adipose Tissue reflect Membrane Dysfunction and Impaired Oxidative Processes in T2D across Heterogenous Populations
Source: Research Square preprint supplement (doi:10.21203/rs.3.rs-7053974/v1), 2025-11-14
Supplement: Supplementary file 5 [file 546becc26818cb6a35dea517.xlsx]

## Sheet: Elevated after BS
Gene symbols	Association ID	Ensemble ID	Protein names
	ILMN_2393144	ENSG00000256028	novel transcript
ABCA1	ILMN_1766054	ENSG00000165029	ATP binding cassette subfamily A member 1
ABCA10	ILMN_2070570	ENSG00000154263	ATP binding cassette subfamily A member 10
ABCA11P	ILMN_2070570	ENSG00000251595	ATP binding cassette subfamily A member 11, pseudogene
ABCA11P	ILMN_2070570	ENSG00000293360	ATP binding cassette subfamily A member 11, pseudogene
ABCB1	ILMN_2094875	ENSG00000085563	ATP binding cassette subfamily B member 1
ABCB10	ILMN_1665730	ENSG00000135776	ATP binding cassette subfamily B member 10
ABCB11	ILMN_2232066	ENSG00000073734	ATP binding cassette subfamily B member 11
ABCB7	ILMN_1687840	ENSG00000131269	ATP binding cassette subfamily B member 7
ABCB9	ILMN_2343048	ENSG00000150967	ATP binding cassette subfamily B member 9
ABCB9	ILMN_2343047	ENSG00000150967	ATP binding cassette subfamily B member 9
ABCC5	ILMN_1706531	ENSG00000114770	ATP binding cassette subfamily C member 5
ABCC9	ILMN_1751453	ENSG00000069431	ATP binding cassette subfamily C member 9
ABCC9	ILMN_2366473	ENSG00000069431	ATP binding cassette subfamily C member 9
ABCD1	ILMN_1772189	ENSG00000101986	ATP binding cassette subfamily D member 1
ABCG1	ILMN_1794782	ENSG00000160179	ATP binding cassette subfamily G member 1
ABCG1	ILMN_1658176	ENSG00000160179	ATP binding cassette subfamily G member 1
ABCG1	ILMN_2329927	ENSG00000160179	ATP binding cassette subfamily G member 1
ABHD10	ILMN_1770031	ENSG00000144827	abhydrolase domain containing 10, depalmitoylase
ABHD12	ILMN_2245305	ENSG00000100997	abhydrolase domain containing 12, lysophospholipase
ABHD14A	ILMN_1794213	ENSG00000248487	abhydrolase domain containing 14A
ABHD18	ILMN_1761963	ENSG00000164074	abhydrolase domain containing 18
ABHD8	ILMN_1712707	ENSG00000127220	abhydrolase domain containing 8
ABI1	ILMN_2329958	ENSG00000136754	abl interactor 1
ABRAXAS2	ILMN_1762615	ENSG00000165660	abraxas 2, BRISC complex subunit
ACAD8	ILMN_2225595	ENSG00000151498	acyl-CoA dehydrogenase family member 8
ACAP2	ILMN_2088825	ENSG00000114331	ArfGAP with coiled-coil, ankyrin repeat and PH domains 2
ACAT1	ILMN_1800008	ENSG00000075239	acetyl-CoA acetyltransferase 1
ACBD6	ILMN_1684271	ENSG00000230124	acyl-CoA binding domain containing 6
ACD	ILMN_1716480	ENSG00000102977	ACD shelterin complex subunit and telomerase recruitment factor
ACIN1	ILMN_1699636	ENSG00000100813	apoptotic chromatin condensation inducer 1
ACKR4	ILMN_2331922	ENSG00000129048	atypical chemokine receptor 4
ACKR4	ILMN_1781769	ENSG00000129048	atypical chemokine receptor 4
ACOX2	ILMN_1685703	ENSG00000168306	acyl-CoA oxidase 2
ACP1	ILMN_1669633	ENSG00000143727	acid phosphatase 1
ACP2	ILMN_2104830	ENSG00000134575	acid phosphatase 2, lysosomal
ACP6	ILMN_2234343	ENSG00000162836	acid phosphatase 6, lysophosphatidic
ACSM5	ILMN_2070792	ENSG00000183549	acyl-CoA synthetase medium chain family member 5
ACSS1	ILMN_1752269	ENSG00000154930	acyl-CoA synthetase short chain family member 1
ACSS2	ILMN_2336595	ENSG00000131069	acyl-CoA synthetase short chain family member 2
ACSS2	ILMN_1714197	ENSG00000131069	acyl-CoA synthetase short chain family member 2
ACTA2	ILMN_1671703	ENSG00000107796	actin alpha 2, smooth muscle
ACTG1P4	ILMN_2094262	ENSG00000236085	actin gamma 1 pseudogene 4
ACTL6A	ILMN_1749297	ENSG00000136518	actin like 6A
ACTL6A	ILMN_2328280	ENSG00000136518	actin like 6A
ACTMAP	ILMN_1729546	ENSG00000188493	actin maturation protease
ACTR10	ILMN_1798254	ENSG00000131966	actin related protein 10
ACTR1B	ILMN_1695821	ENSG00000115073	actin related protein 1B
ACTR5	ILMN_1652594	ENSG00000101442	actin related protein 5
ACTR6	ILMN_1697585	ENSG00000075089	actin related protein 6
ACTR8	ILMN_1689162	ENSG00000113812	actin related protein 8
ACVR1	ILMN_1760490	ENSG00000115170	activin A receptor type 1
ACVR2A	ILMN_2152711	ENSG00000121989	activin A receptor type 2A
ACVRL1	ILMN_1807493	ENSG00000139567	activin A receptor like type 1
ACYP1	ILMN_1694233	ENSG00000119640	acylphosphatase 1
ADAM28	ILMN_1802100	ENSG00000042980	ADAM metallopeptidase domain 28
ADAMTS5	ILMN_1681886	ENSG00000154736	ADAM metallopeptidase with thrombospondin type 1 motif 5
ADAMTS6	ILMN_1767362	ENSG00000049192	ADAM metallopeptidase with thrombospondin type 1 motif 6
ADAMTSL1	ILMN_1722621	ENSG00000178031	ADAMTS like 1
ADAMTSL1	ILMN_1705250	ENSG00000178031	ADAMTS like 1
ADAP2	ILMN_1763000	ENSG00000184060	ArfGAP with dual PH domains 2
ADCK2	ILMN_1663132	ENSG00000133597	aarF domain containing kinase 2
ADCY3	ILMN_1676893	ENSG00000138031	adenylate cyclase 3
ADD1	ILMN_1759252	ENSG00000087274	adducin 1
ADD3	ILMN_1787378	ENSG00000148700	adducin 3
ADD3	ILMN_2311278	ENSG00000148700	adducin 3
ADD3	ILMN_1814526	ENSG00000148700	adducin 3
ADGRG2	ILMN_2349071	ENSG00000173698	adhesion G protein-coupled receptor G2
ADGRG2	ILMN_1751885	ENSG00000173698	adhesion G protein-coupled receptor G2
ADGRG5	ILMN_1666902	ENSG00000159618	adhesion G protein-coupled receptor G5
ADGRL2	ILMN_1697548	ENSG00000117114	adhesion G protein-coupled receptor L2
ADH1A	ILMN_1764309	ENSG00000187758	alcohol dehydrogenase 1A (class I), alpha polypeptide
ADH1B	ILMN_1811598	ENSG00000196616	alcohol dehydrogenase 1B (class I), beta polypeptide
ADHFE1	ILMN_2363634	ENSG00000147576	alcohol dehydrogenase iron containing 1
ADHFE1	ILMN_1702858	ENSG00000147576	alcohol dehydrogenase iron containing 1
ADISSP	ILMN_1697363	ENSG00000101220	adipose secreted signaling protein
ADNP	ILMN_1657993	ENSG00000101126	activity dependent neuroprotector homeobox
ADORA3	ILMN_1730710	ENSG00000282608	adenosine A3 receptor
ADRA1B	ILMN_1679754	ENSG00000170214	adrenoceptor alpha 1B
ADSL	ILMN_1790757	ENSG00000239900	adenylosuccinate lyase
ADSS1	ILMN_1720235	ENSG00000185100	adenylosuccinate synthase 1
ADSS2	ILMN_2092664	ENSG00000035687	adenylosuccinate synthase 2
AEBP1	ILMN_1736178	ENSG00000106624	AE binding protein 1
AGAP3	ILMN_1795918	ENSG00000133612	ArfGAP with GTPase domain, ankyrin repeat and PH domain 3
AGAP4	ILMN_2189007	ENSG00000188234	ArfGAP with GTPase domain, ankyrin repeat and PH domain 4
AGAP6	ILMN_2209578	ENSG00000204149	ArfGAP with GTPase domain, ankyrin repeat and PH domain 6
AGBL5	ILMN_2290776	ENSG00000084693	AGBL carboxypeptidase 5
AGGF1	ILMN_2064917	ENSG00000164252	angiogenic factor with G-patch and FHA domains 1
AGO1	ILMN_1671326	ENSG00000092847	argonaute RISC component 1
AGTR1	ILMN_2341343	ENSG00000144891	angiotensin II receptor type 1
AGTR1	ILMN_1814327	ENSG00000144891	angiotensin II receptor type 1
AHI1	ILMN_1791006	ENSG00000135541	Abelson helper integration site 1
AHSA2P	ILMN_1798308	ENSG00000173209	activator of HSP90 ATPase homolog 2, pseudogene
AHSA2P	ILMN_1798308	ENSG00000293434	activator of HSP90 ATPase homolog 2, pseudogene
AIP	ILMN_2103841	ENSG00000110711	aryl hydrocarbon receptor interacting protein
AJM1	ILMN_1676611	ENSG00000232434	apical junction component 1 homolog
AKAP11	ILMN_2293758	ENSG00000023516	A-kinase anchoring protein 11
AKIP1	ILMN_1788356	ENSG00000166452	A-kinase interacting protein 1
AKIP1	ILMN_2359029	ENSG00000166452	A-kinase interacting protein 1
AKIP1	ILMN_1752988	ENSG00000166452	A-kinase interacting protein 1
AKR1A1	ILMN_2380771	ENSG00000117448	aldo-keto reductase family 1 member A1
AKR1A1	ILMN_1728047	ENSG00000117448	aldo-keto reductase family 1 member A1
AKR1B1	ILMN_1701731	ENSG00000085662	aldo-keto reductase family 1 member B
ALDH3B1	ILMN_1728662	ENSG00000006534	aldehyde dehydrogenase 3 family member B1
ALDH7A1	ILMN_1687508	ENSG00000164904	aldehyde dehydrogenase 7 family member A1
ALDH7A1P1	ILMN_1687508	ENSG00000251400	aldehyde dehydrogenase 7 family member A1 pseudogene 1
ALG3	ILMN_1711886	ENSG00000214160	ALG3 alpha-1,3- mannosyltransferase
ALG5	ILMN_1664449	ENSG00000120697	ALG5 dolichyl-phosphate beta-glucosyltransferase
ALK	ILMN_1753135	ENSG00000171094	ALK receptor tyrosine kinase
ALKBH3	ILMN_2134062	ENSG00000166199	alkB homolog 3, alpha-ketoglutarate dependent dioxygenase
ALKBH4	ILMN_1805673	ENSG00000160993	alkB homolog 4, lysine demethylase
ALKBH5	ILMN_1657283	ENSG00000091542	alkB homolog 5, RNA demethylase
ALKBH7	ILMN_1761764	ENSG00000125652	alkB homolog 7
ALKBH8	ILMN_1779190	ENSG00000137760	alkB homolog 8, tRNA methyltransferase
ALPK2	ILMN_1811238	ENSG00000198796	alpha kinase 2
ALS2	ILMN_1750256	ENSG00000003393	alsin Rho guanine nucleotide exchange factor ALS2
ALX1	ILMN_1724540	ENSG00000180318	ALX homeobox 1
AMACR	ILMN_1759670	ENSG00000242110	alpha-methylacyl-CoA racemase
AMACR	ILMN_2367172	ENSG00000242110	alpha-methylacyl-CoA racemase
AMDHD2	ILMN_1695759	ENSG00000162066	amidohydrolase domain containing 2
AMER1	ILMN_1750051	ENSG00000184675	APC membrane recruitment protein 1
AMHR2	ILMN_1736412	ENSG00000135409	anti-Mullerian hormone receptor type 2
AMMECR1	ILMN_1670506	ENSG00000101935	AMMECR nuclear protein 1
AMMECR1	ILMN_1779374	ENSG00000101935	AMMECR nuclear protein 1
AMT	ILMN_1665331	ENSG00000145020	aminomethyltransferase
AMY1A	ILMN_2094262	ENSG00000237763	amylase alpha 1A
AMY1B	ILMN_2094262	ENSG00000174876	amylase alpha 1B
AMY1C	ILMN_2094262	ENSG00000187733	amylase alpha 1C
AMY2A	ILMN_2094262	ENSG00000243480	amylase alpha 2A
AMY2B	ILMN_2073157	ENSG00000240038	amylase alpha 2B
AMY2B	ILMN_2094262	ENSG00000240038	amylase alpha 2B
ANAPC1	ILMN_1804812	ENSG00000153107	anaphase promoting complex subunit 1
ANAPC16	ILMN_1738955	ENSG00000166295	anaphase promoting complex subunit 16
ANAPC1P2	ILMN_2278433	ENSG00000231259	ANAPC1 pseudogene 2
ANAPC1P2	ILMN_2278433	ENSG00000285793	ANAPC1 pseudogene 2
ANAPC1P4	ILMN_2278433	ENSG00000234231	ANAPC1 pseudogene 4
ANAPC4	ILMN_1802973	ENSG00000053900	anaphase promoting complex subunit 4
ANAPC5	ILMN_1723177	ENSG00000089053	anaphase promoting complex subunit 5
ANG	ILMN_2294978	ENSG00000214274	angiogenin
ANG	ILMN_1776602	ENSG00000214274	angiogenin
ANG	ILMN_2408572	ENSG00000214274	angiogenin
ANG	ILMN_1760727	ENSG00000214274	angiogenin
ANG	ILMN_2239408	ENSG00000214274	angiogenin
ANGEL2	ILMN_1736340	ENSG00000174606	angel homolog 2
ANKAR	ILMN_2112829	ENSG00000151687	ankyrin and armadillo repeat containing
ANKFY1	ILMN_1801464	ENSG00000185722	ankyrin repeat and FYVE domain containing 1
ANKFY1	ILMN_1794470	ENSG00000185722	ankyrin repeat and FYVE domain containing 1
ANKHD1-EIF4EBP3	ILMN_1766560	ENSG00000254996	ANKHD1-EIF4EBP3 readthrough
ANKMY2	ILMN_1784292	ENSG00000106524	ankyrin repeat and MYND domain containing 2
ANKRA2	ILMN_2185563	ENSG00000164331	ankyrin repeat family A member 2
ANKRD12	ILMN_1661833	ENSG00000101745	ankyrin repeat domain 12
ANKRD16	ILMN_1659156	ENSG00000134461	ankyrin repeat domain 16
ANKRD16	ILMN_2353431	ENSG00000134461	ankyrin repeat domain 16
ANKRD36C	ILMN_1811117	ENSG00000174501	ankyrin repeat domain 36C
ANKRD40CL	ILMN_1710619	ENSG00000167117	ANKRD40 C-terminal like
ANKRD49	ILMN_1669259	ENSG00000168876	ankyrin repeat domain 49
ANKRD50	ILMN_2226304	ENSG00000151458	ankyrin repeat domain containing 50
ANKRD6	ILMN_2178587	ENSG00000135299	ankyrin repeat domain 6
ANKS1A	ILMN_1813669	ENSG00000064999	ankyrin repeat and sterile alpha motif domain containing 1A
ANKZF1	ILMN_1677487	ENSG00000163516	ankyrin repeat and zinc finger peptidyl tRNA hydrolase 1
ANP32AP1	ILMN_2056002	ENSG00000259516	acidic nuclear phosphoprotein 32 family member A pseudogene 1
ANP32B	ILMN_1684293	ENSG00000136938	acidic nuclear phosphoprotein 32 family member B
ANTXR1	ILMN_2387995	ENSG00000169604	ANTXR cell adhesion molecule 1
ANTXR1	ILMN_1670379	ENSG00000169604	ANTXR cell adhesion molecule 1
ANXA11	ILMN_2380494	ENSG00000122359	annexin A11
ANXA2R	ILMN_2098616	ENSG00000177721	annexin A2 receptor
ANXA7	ILMN_1703791	ENSG00000138279	annexin A7
AP1S1	ILMN_1712806	ENSG00000106367	adaptor related protein complex 1 subunit sigma 1
AP2B1	ILMN_2331735	ENSG00000006125	adaptor related protein complex 2 subunit beta 1
AP2B1	ILMN_1681998	ENSG00000006125	adaptor related protein complex 2 subunit beta 1
AP2S1	ILMN_1809957	ENSG00000042753	adaptor related protein complex 2 subunit sigma 1
AP3M2	ILMN_1676946	ENSG00000070718	adaptor related protein complex 3 subunit mu 2
AP4B1	ILMN_1669377	ENSG00000134262	adaptor related protein complex 4 subunit beta 1
APBB3	ILMN_1740772	ENSG00000113108	amyloid beta precursor protein binding family B member 3
APBB3	ILMN_2320513	ENSG00000113108	amyloid beta precursor protein binding family B member 3
APEH	ILMN_1718023	ENSG00000164062	acylaminoacyl-peptide hydrolase
APEX1	ILMN_1661886	ENSG00000100823	apurinic/apyrimidinic endodeoxyribonuclease 1
APEX1	ILMN_2319344	ENSG00000100823	apurinic/apyrimidinic endodeoxyribonuclease 1
APH1A	ILMN_2398388	ENSG00000117362	aph-1 homolog A, gamma-secretase subunit
APH1A	ILMN_1658472	ENSG00000117362	aph-1 homolog A, gamma-secretase subunit
API5	ILMN_1815051	ENSG00000166181	apoptosis inhibitor 5
APMAP	ILMN_1674394	ENSG00000101474	adipocyte plasma membrane associated protein
APOBEC3C	ILMN_1675684	ENSG00000244509	apolipoprotein B mRNA editing enzyme catalytic subunit 3C
APOC1	ILMN_1789007	ENSG00000130208	apolipoprotein C1
APOE	ILMN_1740938	ENSG00000130203	apolipoprotein E
APOM	ILMN_1731941	ENSG00000204444	apolipoprotein M
APPBP2	ILMN_2149766	ENSG00000062725	amyloid beta precursor protein binding protein 2
APPL2	ILMN_1765076	ENSG00000136044	adaptor protein, phosphotyrosine interacting with PH domain and leucine zipper 2
APRT	ILMN_1726410	ENSG00000198931	adenine phosphoribosyltransferase
APTX	ILMN_1726752	ENSG00000137074	aprataxin
APTX	ILMN_2317348	ENSG00000137074	aprataxin
ARAP1	ILMN_1772233	ENSG00000186635	ArfGAP with RhoGAP domain, ankyrin repeat and PH domain 1
ARF5	ILMN_1752340	ENSG00000004059	ADP ribosylation factor 5
ARFGAP1	ILMN_2406873	ENSG00000101199	ADP ribosylation factor GTPase activating protein 1
ARFGAP1	ILMN_1675709	ENSG00000101199	ADP ribosylation factor GTPase activating protein 1
ARFGAP2	ILMN_1769250	ENSG00000149182	ADP ribosylation factor GTPase activating protein 2
ARHGAP1	ILMN_1732060	ENSG00000175220	Rho GTPase activating protein 1
ARHGAP12	ILMN_2101810	ENSG00000165322	Rho GTPase activating protein 12
ARHGAP19	ILMN_1688953	ENSG00000213390	Rho GTPase activating protein 19
ARHGAP24	ILMN_2352633	ENSG00000138639	Rho GTPase activating protein 24
ARHGAP24	ILMN_1765876	ENSG00000138639	Rho GTPase activating protein 24
ARHGAP24	ILMN_1775441	ENSG00000138639	Rho GTPase activating protein 24
ARHGAP28	ILMN_2290204	ENSG00000088756	Rho GTPase activating protein 28
ARHGAP32	ILMN_1722726	ENSG00000134909	Rho GTPase activating protein 32
ARHGAP33	ILMN_1678781	ENSG00000004777	Rho GTPase activating protein 33
ARHGEF18	ILMN_1664016	ENSG00000104880	Rho/Rac guanine nucleotide exchange factor 18
ARHGEF25	ILMN_2388965	ENSG00000240771	Rho guanine nucleotide exchange factor 25
ARHGEF7	ILMN_1796912	ENSG00000102606	Rho guanine nucleotide exchange factor 7
ARHGEF9	ILMN_1779370	ENSG00000131089	Cdc42 guanine nucleotide exchange factor 9
ARID2	ILMN_2182335	ENSG00000189079	AT-rich interaction domain 2
ARID3A	ILMN_1670130	ENSG00000116017	AT-rich interaction domain 3A
ARID4A	ILMN_1810229	ENSG00000032219	AT-rich interaction domain 4A
ARL1	ILMN_1813091	ENSG00000120805	ADP ribosylation factor like GTPase 1
ARL10	ILMN_1774334	ENSG00000175414	ADP ribosylation factor like GTPase 10
ARL2BP	ILMN_1755391	ENSG00000102931	ADP ribosylation factor like GTPase 2 binding protein
ARL3	ILMN_1780444	ENSG00000138175	ADP ribosylation factor like GTPase 3
ARL6IP1	ILMN_2255310	ENSG00000170540	ADP ribosylation factor like GTPase 6 interacting protein 1
ARL6IP4	ILMN_2393144	ENSG00000182196	ADP ribosylation factor like GTPase 6 interacting protein 4
ARL6IP5	ILMN_1769810	ENSG00000144746	ADP ribosylation factor like GTPase 6 interacting protein 5
ARMC1	ILMN_1722066	ENSG00000104442	armadillo repeat containing 1
ARMC7	ILMN_1797298	ENSG00000125449	armadillo repeat containing 7
ARMCX2	ILMN_1785170	ENSG00000184867	armadillo repeat containing X-linked 2
ARMCX5	ILMN_1741156	ENSG00000125962	armadillo repeat containing X-linked 5
ARMCX5-GPRASP2	ILMN_1708131	ENSG00000286237	ARMCX5-GPRASP2 readthrough
ARMCX6	ILMN_2414533	ENSG00000198960	armadillo repeat containing X-linked 6
ARMCX7P	ILMN_2414533	ENSG00000204072	armadillo repeat containing X-linked 7, pseudogene
ARNT	ILMN_2347314	ENSG00000143437	aryl hydrocarbon receptor nuclear translocator
ARPC1A	ILMN_1759915	ENSG00000241685	actin related protein 2/3 complex subunit 1A
ARPC5	ILMN_1768394	ENSG00000162704	actin related protein 2/3 complex subunit 5
ARPIN	ILMN_2189406	ENSG00000242498	actin related protein 2/3 complex inhibitor
ARRB1	ILMN_2325168	ENSG00000137486	arrestin beta 1
ARRB1	ILMN_1730620	ENSG00000137486	arrestin beta 1
ARRDC1-AS1	ILMN_1799320	ENSG00000203993	ARRDC1 antisense RNA 1
ARRDC2	ILMN_1715181	ENSG00000105643	arrestin domain containing 2
ARRDC2	ILMN_1655612	ENSG00000105643	arrestin domain containing 2
ARSD	ILMN_1684873	ENSG00000006756	arylsulfatase D
ASAP3	ILMN_1685441	ENSG00000088280	ArfGAP with SH3 domain, ankyrin repeat and PH domain 3
ASB1	ILMN_1683096	ENSG00000065802	ankyrin repeat and SOCS box containing 1
ASB13	ILMN_1654385	ENSG00000196372	ankyrin repeat and SOCS box containing 13
ASB3	ILMN_2358783	ENSG00000115239	ankyrin repeat and SOCS box containing 3
ASB8	ILMN_2173740	ENSG00000177981	ankyrin repeat and SOCS box containing 8
ASCL2	ILMN_1723412	ENSG00000183734	achaete-scute family bHLH transcription factor 2
ASF1A	ILMN_1714737	ENSG00000111875	anti-silencing function 1A histone chaperone
ASH2L	ILMN_1666933	ENSG00000129691	ASH2 like, histone lysine methyltransferase complex subunit
ASIC1	ILMN_1769694	ENSG00000110881	acid sensing ion channel subunit 1
ASIC4	ILMN_2287535	ENSG00000072182	acid sensing ion channel subunit family member 4
ASIP	ILMN_1791647	ENSG00000101440	agouti signaling protein
ASTE1	ILMN_1803813	ENSG00000034533	asteroid homolog 1
ATG12	ILMN_2188204	ENSG00000145782	autophagy related 12
ATG14	ILMN_1678808	ENSG00000126775	autophagy related 14
ATG5	ILMN_1718265	ENSG00000057663	autophagy related 5
ATL1	ILMN_2381476	ENSG00000198513	atlastin GTPase 1
ATM	ILMN_2370825	ENSG00000149311	ATM serine/threonine kinase
ATOH8	ILMN_1654065	ENSG00000168874	atonal bHLH transcription factor 8
ATP5F1A	ILMN_1764494	ENSG00000152234	ATP synthase F1 subunit alpha
ATP5F1A	ILMN_2341363	ENSG00000152234	ATP synthase F1 subunit alpha
ATP5F1D	ILMN_1679178	ENSG00000099624	ATP synthase F1 subunit delta
ATP5F1D	ILMN_1653599	ENSG00000099624	ATP synthase F1 subunit delta
ATP5IF1	ILMN_1727332	ENSG00000130770	ATP synthase inhibitory factor subunit 1
ATP5IF1	ILMN_1685978	ENSG00000130770	ATP synthase inhibitory factor subunit 1
ATP5MC2	ILMN_1660577	ENSG00000135390	ATP synthase membrane subunit c locus 2
ATP5ME	ILMN_1772506	ENSG00000169020	ATP synthase membrane subunit e
ATP5ME	ILMN_1726603	ENSG00000169020	ATP synthase membrane subunit e
ATP5MG	ILMN_2079285	ENSG00000167283	ATP synthase membrane subunit g
ATP5MJ	ILMN_1652722	ENSG00000156411	ATP synthase membrane subunit j
ATP5PB	ILMN_1721989	ENSG00000116459	ATP synthase peripheral stalk-membrane subunit b
ATP5PD	ILMN_1666372	ENSG00000167863	ATP synthase peripheral stalk subunit d
ATP5PD	ILMN_1794912	ENSG00000167863	ATP synthase peripheral stalk subunit d
ATP5PO	ILMN_1791332	ENSG00000241837	ATP synthase peripheral stalk subunit OSCP
ATP6AP1	ILMN_1697694	ENSG00000071553	ATPase H+ transporting accessory protein 1
ATP6AP1L	ILMN_1755990	ENSG00000205464	ATPase H+ transporting accessory protein 1 like (pseudogene)
ATP6V0A1	ILMN_1752579	ENSG00000033627	ATPase H+ transporting V0 subunit a1
ATP6V1C1	ILMN_1659801	ENSG00000155097	ATPase H+ transporting V1 subunit C1
ATP6V1E1	ILMN_2339779	ENSG00000131100	ATPase H+ transporting V1 subunit E1
ATP6V1G1	ILMN_1784523	ENSG00000136888	ATPase H+ transporting V1 subunit G1
ATP6V1G2-DDX39B	ILMN_1686626	ENSG00000254870	ATP6V1G2-DDX39B readthrough (NMD candidate)
ATP8B2	ILMN_1782057	ENSG00000143515	ATPase phospholipid transporting 8B2
ATP8B4	ILMN_1783956	ENSG00000104043	ATPase phospholipid transporting 8B4 (putative)
ATPAF1	ILMN_2395055	ENSG00000123472	ATP synthase mitochondrial F1 complex assembly factor 1
ATRAID	ILMN_2386016	ENSG00000138085	all-trans retinoic acid induced differentiation factor
ATRAID	ILMN_1774584	ENSG00000138085	all-trans retinoic acid induced differentiation factor
ATRN	ILMN_2355586	ENSG00000088812	attractin
ATXN1	ILMN_2153332	ENSG00000124788	ataxin 1
ATXN3	ILMN_2393497	ENSG00000066427	ataxin 3
AUTS2	ILMN_1749081	ENSG00000158321	activator of transcription and developmental regulator AUTS2
AXIN2	ILMN_1724480	ENSG00000168646	axin 2
AZGP1	ILMN_1797154	ENSG00000160862	alpha-2-glycoprotein 1, zinc-binding
AZIN1	ILMN_1656682	ENSG00000155096	antizyme inhibitor 1
B3GALNT1	ILMN_1787595	ENSG00000169255	beta-1,3-N-acetylgalactosaminyltransferase 1 (globoside blood group)
B3GALNT1	ILMN_2325347	ENSG00000169255	beta-1,3-N-acetylgalactosaminyltransferase 1 (globoside blood group)
B3GALT5	ILMN_1800713	ENSG00000183778	beta-1,3-galactosyltransferase 5
B4GALNT4	ILMN_1796663	ENSG00000182272	beta-1,4-N-acetyl-galactosaminyltransferase 4
BABAM1	ILMN_1806937	ENSG00000105393	BRISC and BRCA1 A complex member 1
BACE1	ILMN_2320349	ENSG00000186318	beta-secretase 1
BAG6	ILMN_2390416	ENSG00000204463	BAG cochaperone 6
BAIAP2-DT	ILMN_1758642	ENSG00000226137	BAIAP2 divergent transcript
BAZ2B	ILMN_1720850	ENSG00000123636	bromodomain adjacent to zinc finger domain 2B
BBS1	ILMN_1800590	ENSG00000174483	Bardet-Biedl syndrome 1
BBS12	ILMN_2166972	ENSG00000181004	Bardet-Biedl syndrome 12
BBS2	ILMN_2230035	ENSG00000125124	Bardet-Biedl syndrome 2
BBS4	ILMN_1762466	ENSG00000140463	Bardet-Biedl syndrome 4
BCAT2	ILMN_1695110	ENSG00000105552	branched chain amino acid transaminase 2
BCDIN3D	ILMN_1796113	ENSG00000186666	BCDIN3 domain containing RNA methyltransferase
BCKDHA	ILMN_1735979	ENSG00000248098	branched chain keto acid dehydrogenase E1 subunit alpha
BCL2L12	ILMN_2396982	ENSG00000126453	BCL2 like 12
BCL7C	ILMN_2371147	ENSG00000099385	BAF chromatin remodeling complex subunit BCL7C
BCL9	ILMN_1704452	ENSG00000116128	BCL9 transcription coactivator
BCO1	ILMN_1814686	ENSG00000135697	beta-carotene oxygenase 1
BCS1L	ILMN_1738529	ENSG00000074582	BCS1 homolog, ubiquinol-cytochrome c reductase complex chaperone
BEND5	ILMN_1675024	ENSG00000162373	BEN domain containing 5
BEND6	ILMN_1706969	ENSG00000151917	BEN domain containing 6
BET1	ILMN_1684042	ENSG00000105829	Bet1 golgi vesicular membrane trafficking protein
BET1L	ILMN_2060652	ENSG00000177951	Bet1 golgi vesicular membrane trafficking protein like
BEX4	ILMN_1804798	ENSG00000102409	brain expressed X-linked 4
BEX4	ILMN_2351638	ENSG00000102409	brain expressed X-linked 4
BHLHA15	ILMN_1673590	ENSG00000180535	basic helix-loop-helix family member a15
BHLHE22	ILMN_1699585	ENSG00000180828	basic helix-loop-helix family member e22
BICRAL	ILMN_1696127	ENSG00000112624	BICRA like chromatin remodeling complex associated protein
BIN1	ILMN_2309245	ENSG00000136717	bridging integrator 1
BIN1	ILMN_1674160	ENSG00000136717	bridging integrator 1
BIRC6	ILMN_1801605	ENSG00000115760	baculoviral IAP repeat containing 6
BIVM	ILMN_2214098	ENSG00000134897	basic, immunoglobulin-like variable motif containing
BIVM-ERCC5	ILMN_1795495	ENSG00000270181	BIVM-ERCC5 readthrough
BLMH	ILMN_1721921	ENSG00000108578	bleomycin hydrolase
BLOC1S1	ILMN_2157510	ENSG00000135441	biogenesis of lysosomal organelles complex 1 subunit 1
BLOC1S5	ILMN_1776352	ENSG00000188428	biogenesis of lysosomal organelles complex 1 subunit 5
BLVRA	ILMN_1691436	ENSG00000106605	biliverdin reductase A
BMF	ILMN_2308338	ENSG00000104081	Bcl2 modifying factor
BMF	ILMN_1695354	ENSG00000104081	Bcl2 modifying factor
BMI1	ILMN_1700915	ENSG00000168283	BMI1 proto-oncogene, polycomb ring finger
BMP7	ILMN_1741566	ENSG00000101144	bone morphogenetic protein 7
BNC2	ILMN_1656373	ENSG00000173068	basonuclin 2
BNIPL	ILMN_1728914	ENSG00000163141	BCL2 interacting protein like
BOC	ILMN_1803956	ENSG00000144857	BOC cell adhesion associated, oncogene regulated
BORCS6	ILMN_2225746	ENSG00000196544	BLOC-1 related complex subunit 6
BRAT1	ILMN_1804498	ENSG00000106009	BRCA1 associated ATM activator 1
BRCA2	ILMN_1677794	ENSG00000139618	BRCA2 DNA repair associated
BRCC3	ILMN_1697546	ENSG00000185515	BRCA1/BRCA2-containing complex subunit 3
BRCC3P1	ILMN_1697546	ENSG00000251667	BRCA1/BRCA2-containing complex subunit 3 pseudogene 1
BRD3	ILMN_1785635	ENSG00000169925	bromodomain containing 3
BRD7	ILMN_2082810	ENSG00000166164	bromodomain containing 7
BRD8	ILMN_2349600	ENSG00000112983	bromodomain containing 8
BRD9	ILMN_1651405	ENSG00000028310	bromodomain containing 9
BRF2	ILMN_1665554	ENSG00000104221	BRF2 RNA polymerase III transcription initiation factor subunit
BRI3	ILMN_1781580	ENSG00000164713	brain protein I3
BRINP3	ILMN_2092589	ENSG00000162670	BMP/retinoic acid inducible neural specific 3
BRK1	ILMN_1764500	ENSG00000254999	BRICK1 subunit of SCAR/WAVE actin nucleating complex
BRWD1	ILMN_1673518	ENSG00000185658	bromodomain and WD repeat domain containing 1
BSCL2	ILMN_1697054	ENSG00000168000	BSCL2 lipid droplet biogenesis associated, seipin
BSCL2	ILMN_1774596	ENSG00000168000	BSCL2 lipid droplet biogenesis associated, seipin
BSDC1	ILMN_1734483	ENSG00000160058	BSD domain containing 1
BTBD7	ILMN_1687743	ENSG00000011114	BTB domain containing 7
BTF3	ILMN_2245676	ENSG00000145741	basic transcription factor 3
BTF3	ILMN_1659762	ENSG00000145741	basic transcription factor 3
BTF3	ILMN_2319414	ENSG00000145741	basic transcription factor 3
BTN2A1	ILMN_2364852	ENSG00000112763	butyrophilin subfamily 2 member A1
BTN2A2	ILMN_1752758	ENSG00000124508	butyrophilin subfamily 2 member A2
BTN3A1	ILMN_1802708	ENSG00000026950	butyrophilin subfamily 3 member A1
BUB3	ILMN_1693145	ENSG00000154473	BUB3 mitotic checkpoint protein
BUD13	ILMN_1749210	ENSG00000137656	BUD13 homolog
C10orf88	ILMN_1775423	ENSG00000119965	chromosome 10 open reading frame 88
C11orf24	ILMN_1808163	ENSG00000171067	chromosome 11 open reading frame 24
C11orf54	ILMN_2213297	ENSG00000182919	chromosome 11 open reading frame 54
C11orf68	ILMN_1757847	ENSG00000175573	chromosome 11 open reading frame 68
C12orf57	ILMN_1812191	ENSG00000111678	chromosome 12 open reading frame 57
C12orf76	ILMN_2152429	ENSG00000174456	chromosome 12 open reading frame 76
C14orf28	ILMN_1807031	ENSG00000179476	chromosome 14 open reading frame 28
C14orf93	ILMN_1724897	ENSG00000100802	chromosome 14 open reading frame 93
C15orf40	ILMN_1660585	ENSG00000169609	chromosome 15 open reading frame 40
C17orf49	ILMN_1763688	ENSG00000258315	chromosome 17 open reading frame 49
C17orf49	ILMN_1715698	ENSG00000258315	chromosome 17 open reading frame 49
C17orf58	ILMN_1688997	ENSG00000186665	chromosome 17 open reading frame 58
C17orf58	ILMN_1700515	ENSG00000186665	chromosome 17 open reading frame 58
C17orf58	ILMN_2398926	ENSG00000186665	chromosome 17 open reading frame 58
C18orf21	ILMN_1805998	ENSG00000141428	chromosome 18 open reading frame 21
C18orf54	ILMN_2169089	ENSG00000166845	chromosome 18 open reading frame 54
C19orf25	ILMN_1655225	ENSG00000119559	chromosome 19 open reading frame 25
C19orf44	ILMN_1801572	ENSG00000105072	chromosome 19 open reading frame 44
C19orf48P	ILMN_1759184	ENSG00000167747	chromosome 19 open reading frame 48, pseudogene
C19orf48P	ILMN_1759184	ENSG00000293495	multidrug resistance-related protein
C19orf53	ILMN_1671374	ENSG00000104979	chromosome 19 open reading frame 53
C1orf21	ILMN_1797735	ENSG00000116667	chromosome 1 open reading frame 21
C1orf35	ILMN_1790202	ENSG00000143793	chromosome 1 open reading frame 35
C1orf50	ILMN_1801941	ENSG00000164008	chromosome 1 open reading frame 50
C1orf74	ILMN_1786470	ENSG00000162757	chromosome 1 open reading frame 74
C1QTNF3	ILMN_1768925	ENSG00000082196	C1q and TNF related 3
C1QTNF3	ILMN_1804604	ENSG00000082196	C1q and TNF related 3
C1QTNF3-AMACR	ILMN_2367172	ENSG00000273294	C1QTNF3-AMACR readthrough (NMD candidate)
C1QTNF4	ILMN_2195462	ENSG00000172247	C1q and TNF related 4
C1QTNF6	ILMN_2361181	ENSG00000133466	C1q and TNF related 6
C1QTNF6	ILMN_1729288	ENSG00000133466	C1q and TNF related 6
C1R	ILMN_1677198	ENSG00000159403	complement C1r
C2CD5	ILMN_1682572	ENSG00000111731	C2 calcium dependent domain containing 5
C3orf18	ILMN_1728581	ENSG00000088543	chromosome 3 open reading frame 18
C3orf70	ILMN_2135339	ENSG00000187068	chromosome 3 open reading frame 70
C4orf46	ILMN_1792712	ENSG00000205208	chromosome 4 open reading frame 46
C5	ILMN_1746819	ENSG00000106804	complement C5
C5orf15	ILMN_1695917	ENSG00000113583	chromosome 5 open reading frame 15
C6	ILMN_1688242	ENSG00000039537	complement C6
C6orf136	ILMN_1813236	ENSG00000204564	chromosome 6 open reading frame 136
C6orf47	ILMN_1795286	ENSG00000204439	chromosome 6 open reading frame 47
C6orf58	ILMN_1754920	ENSG00000184530	chromosome 6 open reading frame 58
C7	ILMN_1687848	ENSG00000112936	complement C7
C7orf50	ILMN_1718336	ENSG00000146540	chromosome 7 open reading frame 50
C8orf44	ILMN_1792242	ENSG00000288596	chromosome 8 putative open reading frame 44
C8orf48	ILMN_1784408	ENSG00000164743	chromosome 8 open reading frame 48
C8orf58	ILMN_1764320	ENSG00000241852	chromosome 8 open reading frame 58
C8orf82	ILMN_1693862	ENSG00000213563	chromosome 8 open reading frame 82
C9orf78	ILMN_1697166	ENSG00000136819	chromosome 9 open reading frame 78
C9orf85	ILMN_1806758	ENSG00000155621	chromosome 9 open reading frame 85
CA11	ILMN_1743219	ENSG00000063180	carbonic anhydrase 11
CA12	ILMN_2382942	ENSG00000074410	carbonic anhydrase 12
CA12	ILMN_1720998	ENSG00000074410	carbonic anhydrase 12
CA3	ILMN_2176450	ENSG00000164879	carbonic anhydrase 3
CABIN1	ILMN_1814044	ENSG00000099991	calcineurin binding protein 1
CABLES1	ILMN_1653001	ENSG00000134508	Cdk5 and Abl enzyme substrate 1
CABLES2	ILMN_1762407	ENSG00000149679	Cdk5 and Abl enzyme substrate 2
CACNA2D3	ILMN_1754076	ENSG00000157445	calcium voltage-gated channel auxiliary subunit alpha2delta 3
CACNA2D4	ILMN_1696317	ENSG00000151062	calcium voltage-gated channel auxiliary subunit alpha2delta 4
CAD	ILMN_1810992	ENSG00000084774	carbamoyl-phosphate synthetase 2, aspartate transcarbamylase, and dihydroorotase
CALHM2	ILMN_1766200	ENSG00000138172	calcium homeostasis modulator family member 2
CALM3	ILMN_1666385	ENSG00000160014	calmodulin 3
CALML4	ILMN_1815707	ENSG00000129007	calmodulin like 4
CAMSAP1	ILMN_1811957	ENSG00000130559	calmodulin regulated spectrin associated protein 1
CAPG	ILMN_1655821	ENSG00000042493	capping actin protein, gelsolin like
CAPN1	ILMN_1705261	ENSG00000014216	calpain 1
CAPN3	ILMN_1687971	ENSG00000092529	calpain 3
CAPN3	ILMN_2332691	ENSG00000092529	calpain 3
CAPN5	ILMN_1737089	ENSG00000149260	calpain 5
CAPS	ILMN_1757660	ENSG00000105519	calcyphosine
CARF	ILMN_1663897	ENSG00000138380	calcium responsive transcription factor
CARM1	ILMN_1680134	ENSG00000142453	coactivator associated arginine methyltransferase 1
CARMIL1	ILMN_1736730	ENSG00000079691	capping protein regulator and myosin 1 linker 1
CASP2	ILMN_1736568	ENSG00000106144	caspase 2
CASP2	ILMN_2410540	ENSG00000106144	caspase 2
CASP6	ILMN_2367113	ENSG00000138794	caspase 6
CAVIN3	ILMN_1793476	ENSG00000170955	caveolae associated protein 3
CBFA2T2	ILMN_1752404	ENSG00000078699	CBFA2/RUNX1 partner transcriptional co-repressor 2
CBFA2T2	ILMN_2331062	ENSG00000078699	CBFA2/RUNX1 partner transcriptional co-repressor 2
CBLN3	ILMN_2053829	ENSG00000139899	cerebellin 3 precursor
CBR1	ILMN_1809003	ENSG00000159228	carbonyl reductase 1
CBR3	ILMN_1652237	ENSG00000159231	carbonyl reductase 3
CBR4	ILMN_1813400	ENSG00000145439	carbonyl reductase 4
CBS	ILMN_1804735	ENSG00000160200	cystathionine beta-synthase
CBX6	ILMN_1691930	ENSG00000183741	chromobox 6
CBX7	ILMN_1657361	ENSG00000100307	chromobox 7
CBY1	ILMN_1730879	ENSG00000100211	chibby family member 1, beta catenin antagonist
CCAR2	ILMN_1804789	ENSG00000158941	cell cycle and apoptosis regulator 2
CCDC112	ILMN_1761101	ENSG00000164221	coiled-coil domain containing 112
CCDC115	ILMN_1730347	ENSG00000136710	coiled-coil domain containing 115
CCDC12	ILMN_1725071	ENSG00000160799	coiled-coil domain containing 12
CCDC121	ILMN_2183772	ENSG00000176714	coiled-coil domain containing 121
CCDC136	ILMN_1706935	ENSG00000128596	coiled-coil domain containing 136
CCDC14	ILMN_1677239	ENSG00000175455	coiled-coil domain containing 14
CCDC154	ILMN_1694731	ENSG00000197599	coiled-coil domain containing 154
CCDC174	ILMN_1750144	ENSG00000154781	coiled-coil domain containing 174
CCDC191	ILMN_2095273	ENSG00000163617	coiled-coil domain containing 191
CCDC25	ILMN_1789266	ENSG00000147419	coiled-coil domain containing 25
CCDC28A	ILMN_1798659	ENSG00000024862	coiled-coil domain containing 28A
CCDC28B	ILMN_2099586	ENSG00000160050	coiled-coil domain containing 28B
CCDC51	ILMN_1799579	ENSG00000164051	coiled-coil domain containing 51
CCDC6	ILMN_1745904	ENSG00000108091	coiled-coil domain containing 6
CCDC66	ILMN_1683533	ENSG00000180376	coiled-coil domain containing 66
CCDC71	ILMN_1768433	ENSG00000177352	coiled-coil domain containing 71
CCDC77	ILMN_2101375	ENSG00000120647	coiled-coil domain containing 77
CCDC8	ILMN_1760314	ENSG00000169515	coiled-coil domain containing 8
CCDC88A	ILMN_1811050	ENSG00000115355	coiled-coil domain containing 88A
CCDC97	ILMN_1801600	ENSG00000142039	coiled-coil domain containing 97
CCL23	ILMN_1686109	ENSG00000274736	C-C motif chemokine ligand 23
CCNB1IP1	ILMN_1714386	ENSG00000100814	cyclin B1 interacting protein 1
CCNB1IP1	ILMN_1752394	ENSG00000100814	cyclin B1 interacting protein 1
CCNB1IP1	ILMN_2347349	ENSG00000100814	cyclin B1 interacting protein 1
CCNF	ILMN_1773119	ENSG00000162063	cyclin F
CCNG1	ILMN_1694491	ENSG00000113328	cyclin G1
CCNI	ILMN_1691942	ENSG00000118816	cyclin I
CCNQ	ILMN_1770623	ENSG00000262919	cyclin Q
CCP110	ILMN_1773200	ENSG00000103540	centriolar coiled-coil protein 110
CCS	ILMN_1766797	ENSG00000173992	copper chaperone for superoxide dismutase
CCSAP	ILMN_1699217	ENSG00000154429	centriole, cilia and spindle associated protein
CCT6B	ILMN_1699610	ENSG00000132141	chaperonin containing TCP1 subunit 6B
CD1C	ILMN_1654210	ENSG00000158481	CD1c molecule
CD2	ILMN_1695025	ENSG00000116824	CD2 molecule
CD24	ILMN_2060413	ENSG00000272398	CD24 molecule
CD24P4	ILMN_2060413	ENSG00000185275	CD24 molecule pseudogene 4
CD276	ILMN_2365307	ENSG00000103855	CD276 molecule
CD2BP2	ILMN_1796244	ENSG00000169217	CD2 cytoplasmic tail binding protein 2
CD34	ILMN_2257587	ENSG00000174059	CD34 molecule
CD34	ILMN_1732799	ENSG00000174059	CD34 molecule
CD34	ILMN_2341229	ENSG00000174059	CD34 molecule
CD3D	ILMN_2325837	ENSG00000167286	CD3 delta subunit of T-cell receptor complex
CD3G	ILMN_1717197	ENSG00000160654	CD3 gamma subunit of T-cell receptor complex
CD47	ILMN_1771333	ENSG00000196776	CD47 molecule
CD47	ILMN_2356991	ENSG00000196776	CD47 molecule
CD63	ILMN_1753468	ENSG00000135404	CD63 molecule
CD70	ILMN_1760247	ENSG00000125726	CD70 molecule
CD99	ILMN_2056032	ENSG00000002586	CD99 molecule (Xg blood group)
CD99	ILMN_2056032	ENSG00000292348	CD99 molecule (Xg blood group)
CD99L2	ILMN_2388142	ENSG00000102181	CD99 molecule like 2
CDAN1	ILMN_1659727	ENSG00000140326	codanin 1
CDC14A	ILMN_1655983	ENSG00000079335	cell division cycle 14A
CDC16	ILMN_1727389	ENSG00000130177	cell division cycle 16
CDC16	ILMN_2339796	ENSG00000130177	cell division cycle 16
CDC16	ILMN_2256765	ENSG00000130177	cell division cycle 16
CDC23	ILMN_1799688	ENSG00000094880	cell division cycle 23
CDC40	ILMN_1737651	ENSG00000168438	cell division cycle 40
CDC42SE2	ILMN_2313926	ENSG00000158985	CDC42 small effector 2
CDCA7L	ILMN_2230683	ENSG00000164649	cell division cycle associated 7 like
CDH11	ILMN_1672611	ENSG00000140937	cadherin 11
CDHR3	ILMN_1809817	ENSG00000128536	cadherin related family member 3
CDK10	ILMN_1741459	ENSG00000185324	cyclin dependent kinase 10
CDK13	ILMN_1778557	ENSG00000065883	cyclin dependent kinase 13
CDK14	ILMN_2171295	ENSG00000058091	cyclin dependent kinase 14
CDK15	ILMN_2216008	ENSG00000138395	cyclin dependent kinase 15
CDK19	ILMN_1676891	ENSG00000155111	cyclin dependent kinase 19
CDK4	ILMN_1689001	ENSG00000135446	cyclin dependent kinase 4
CDK5RAP1	ILMN_1711023	ENSG00000101391	CDK5 regulatory subunit associated protein 1
CDK5RAP3	ILMN_1812557	ENSG00000108465	CDK5 regulatory subunit associated protein 3
CDKN1B	ILMN_2196347	ENSG00000111276	cyclin dependent kinase inhibitor 1B
CDKN1C	ILMN_1718565	ENSG00000129757	cyclin dependent kinase inhibitor 1C
CDKN2C	ILMN_1656415	ENSG00000123080	cyclin dependent kinase inhibitor 2C
CDNF	ILMN_1687291	ENSG00000185267	cerebral dopamine neurotrophic factor
CDPF1	ILMN_1660379	ENSG00000205643	cysteine rich DPF motif domain containing 1
CDPF1	ILMN_2325112	ENSG00000205643	cysteine rich DPF motif domain containing 1
CDS1	ILMN_1801476	ENSG00000163624	CDP-diacylglycerol synthase 1
CEBPA	ILMN_1715715	ENSG00000245848	CCAAT enhancer binding protein alpha
CELF2	ILMN_2400947	ENSG00000048740	CUGBP Elav-like family member 2
CELF6	ILMN_1656045	ENSG00000140488	CUGBP Elav-like family member 6
CENATAC	ILMN_1709227	ENSG00000186166	centrosomal AT-AC splicing factor
CENPB	ILMN_1664028	ENSG00000125817	centromere protein B
CENPJ	ILMN_1661776	ENSG00000151849	centromere protein J
CENPQ	ILMN_1670769	ENSG00000031691	centromere protein Q
CENPW	ILMN_1763907	ENSG00000203760	centromere protein W
CENPX	ILMN_1769634	ENSG00000169689	centromere protein X
CEP131	ILMN_1746206	ENSG00000141577	centrosomal protein 131
CEP162	ILMN_1781174	ENSG00000135315	centrosomal protein 162
CEP192	ILMN_1703754	ENSG00000101639	centrosomal protein 192
CEP44	ILMN_2213199	ENSG00000164118	centrosomal protein 44
CEP57	ILMN_1791568	ENSG00000166037	centrosomal protein 57
CEP57L1	ILMN_1734766	ENSG00000183137	centrosomal protein 57 like 1
CEP83	ILMN_1799113	ENSG00000173588	centrosomal protein 83
CEP95	ILMN_1686135	ENSG00000258890	centrosomal protein 95
CEPT1	ILMN_2356838	ENSG00000134255	choline/ethanolamine phosphotransferase 1
CERK	ILMN_2388975	ENSG00000100422	ceramide kinase
CERK	ILMN_1767475	ENSG00000100422	ceramide kinase
CETP	ILMN_2098013	ENSG00000087237	cholesteryl ester transfer protein
CFAP410	ILMN_1758806	ENSG00000160226	cilia and flagella associated protein 410
CFAP61	ILMN_1684629	ENSG00000089101	cilia and flagella associated protein 61
CFAP68	ILMN_2128967	ENSG00000137720	cilia and flagella associated protein 68
CGGBP1	ILMN_1752631	ENSG00000163320	CGG triplet repeat binding protein 1
CHAMP1	ILMN_1729976	ENSG00000198824	chromosome alignment maintaining phosphoprotein 1
CHCHD6	ILMN_1785161	ENSG00000159685	coiled-coil-helix-coiled-coil-helix domain containing 6
CHD8	ILMN_1806122	ENSG00000100888	chromodomain helicase DNA binding protein 8
CHD9	ILMN_1762972	ENSG00000177200	chromodomain helicase DNA binding protein 9
CHEK2	ILMN_2395236	ENSG00000183765	checkpoint kinase 2
CHKA	ILMN_1691151	ENSG00000110721	choline kinase alpha
CHKA	ILMN_1658504	ENSG00000110721	choline kinase alpha
CHKB	ILMN_2331205	ENSG00000100288	choline kinase beta
CHKB-CPT1B	ILMN_2331205	ENSG00000254413	CHKB-CPT1B readthrough (NMD candidate)
CHMP2A	ILMN_1671893	ENSG00000130724	charged multivesicular body protein 2A
CHMP6	ILMN_1731609	ENSG00000176108	charged multivesicular body protein 6
CHODL	ILMN_1726575	ENSG00000154645	chondrolectin
CHP1	ILMN_1779401	ENSG00000187446	calcineurin like EF-hand protein 1
CHRNA1	ILMN_2268969	ENSG00000138435	cholinergic receptor nicotinic alpha 1 subunit
CHRNB1	ILMN_1741131	ENSG00000170175	cholinergic receptor nicotinic beta 1 subunit
CHST12	ILMN_1735058	ENSG00000136213	carbohydrate sulfotransferase 12
CHST14	ILMN_1743340	ENSG00000169105	carbohydrate sulfotransferase 14
CIAO1	ILMN_2048793	ENSG00000144021	cytosolic iron-sulfur assembly component 1
CIAO2A	ILMN_2367428	ENSG00000166797	cytosolic iron-sulfur assembly component 2A
CIAO2A	ILMN_1761981	ENSG00000166797	cytosolic iron-sulfur assembly component 2A
CIB1	ILMN_1684205	ENSG00000185043	calcium and integrin binding 1
CIDEA	ILMN_2390318	ENSG00000176194	cell death inducing DFFA like effector a
CIDEB	ILMN_1668910	ENSG00000136305	cell death inducing DFFA like effector b
CIPC	ILMN_2097858	ENSG00000198894	CLOCK interacting pacemaker
CIR1	ILMN_1671516	ENSG00000138433	corepressor interacting with RBPJ, CIR1
CIRBP	ILMN_1674661	ENSG00000099622	cold inducible RNA binding protein
CISD2	ILMN_1796397	ENSG00000145354	CDGSH iron sulfur domain 2
CITED2	ILMN_1663092	ENSG00000164442	Cbp/p300 interacting transactivator with Glu/Asp rich carboxy-terminal domain 2
CKAP2	ILMN_2181060	ENSG00000136108	cytoskeleton associated protein 2
CKAP5	ILMN_1748770	ENSG00000175216	cytoskeleton associated protein 5
CKB	ILMN_1671478	ENSG00000166165	creatine kinase B
CKS1B	ILMN_2041046	ENSG00000173207	CDC28 protein kinase regulatory subunit 1B
CKS1BP2	ILMN_2041046	ENSG00000225976	CDC28 protein kinase regulatory subunit 1B pseudogene 2
CKS1BP3	ILMN_2041046	ENSG00000268942	CDC28 protein kinase regulatory subunit 1B pseudogene 3
CLCN6	ILMN_1763036	ENSG00000011021	chloride voltage-gated channel 6
CLCN6	ILMN_1741594	ENSG00000011021	chloride voltage-gated channel 6
CLCN7	ILMN_1694731	ENSG00000103249	chloride voltage-gated channel 7
CLDN12	ILMN_1787657	ENSG00000157224	claudin 12
CLDN23	ILMN_1725338	ENSG00000253958	claudin 23
CLDN3	ILMN_1723042	ENSG00000165215	claudin 3
CLEC11A	ILMN_1807359	ENSG00000105472	C-type lectin domain containing 11A
CLEC2B	ILMN_1784608	ENSG00000110852	C-type lectin domain family 2 member B
CLEC2D	ILMN_1711702	ENSG00000069493	C-type lectin domain family 2 member D
CLEC3B	ILMN_1682176	ENSG00000163815	C-type lectin domain family 3 member B
CLEC4GP1	ILMN_1740502	ENSG00000268297	C-type lectin domain family 4 member G pseudogene 1
CLK2	ILMN_2362911	ENSG00000176444	CDC like kinase 2
CLK2	ILMN_1787109	ENSG00000176444	CDC like kinase 2
CLK4	ILMN_1695853	ENSG00000113240	CDC like kinase 4
CLN5	ILMN_1778203	ENSG00000102805	CLN5 intracellular trafficking protein
CLNS1A	ILMN_1736814	ENSG00000074201	chloride nucleotide-sensitive channel 1A
CLPX	ILMN_1709894	ENSG00000166855	caseinolytic mitochondrial matrix peptidase chaperone subunit X
CLSTN1	ILMN_2415179	ENSG00000171603	calsyntenin 1
CLTA	ILMN_1695420	ENSG00000122705	clathrin light chain A
CLU	ILMN_1798298	ENSG00000120885	clusterin
CMA1	ILMN_1770772	ENSG00000092009	chymase 1
CMAS	ILMN_2125374	ENSG00000111726	cytidine monophosphate N-acetylneuraminic acid synthetase
CMKLR1	ILMN_1673030	ENSG00000174600	chemerin chemokine-like receptor 1
CMSS1	ILMN_2215545	ENSG00000184220	cms1 ribosomal small subunit homolog
CMTM3	ILMN_2370208	ENSG00000140931	CKLF like MARVEL transmembrane domain containing 3
CMTM3	ILMN_1705442	ENSG00000140931	CKLF like MARVEL transmembrane domain containing 3
CMTR2	ILMN_1814573	ENSG00000180917	cap methyltransferase 2
CNIH3	ILMN_1749071	ENSG00000143786	cornichon family AMPA receptor auxiliary protein 3
CNN2	ILMN_1770290	ENSG00000064666	calponin 2
CNNM3	ILMN_1662328	ENSG00000168763	cyclin and CBS domain divalent metal cation transport mediator 3
CNOT1	ILMN_1669206	ENSG00000125107	CCR4-NOT transcription complex subunit 1
CNOT10	ILMN_2078334	ENSG00000182973	CCR4-NOT transcription complex subunit 10
CNOT11	ILMN_1708906	ENSG00000158435	CCR4-NOT transcription complex subunit 11
CNOT6	ILMN_2136177	ENSG00000113300	CCR4-NOT transcription complex subunit 6
CNOT7	ILMN_1715886	ENSG00000198791	CCR4-NOT transcription complex subunit 7
CNOT7P2	ILMN_1715886	ENSG00000232185	CCR4-NOT transcription complex subunit 7 pseudogene 2
CNPPD1	ILMN_1795419	ENSG00000115649	cyclin Pas1/PHO80 domain containing 1
CNPY2	ILMN_2123402	ENSG00000257727	canopy FGF signaling regulator 2
CNPY4	ILMN_2252408	ENSG00000166997	canopy FGF signaling regulator 4
CNRIP1	ILMN_2182148	ENSG00000119865	cannabinoid receptor interacting protein 1
CNTN1	ILMN_2400407	ENSG00000018236	contactin 1
COA3	ILMN_2064898	ENSG00000183978	cytochrome c oxidase assembly factor 3
COA5	ILMN_1683065	ENSG00000183513	cytochrome c oxidase assembly factor 5
COASY	ILMN_2352326	ENSG00000068120	Coenzyme A synthase
COASY	ILMN_1753498	ENSG00000068120	Coenzyme A synthase
COG1	ILMN_1791873	ENSG00000166685	component of oligomeric golgi complex 1
COG2	ILMN_1776993	ENSG00000135775	component of oligomeric golgi complex 2
COG3	ILMN_2129715	ENSG00000136152	component of oligomeric golgi complex 3
COIL	ILMN_1688034	ENSG00000121058	coilin
COL13A1	ILMN_2311052	ENSG00000197467	collagen type XIII alpha 1 chain
COL1A1	ILMN_1701308	ENSG00000108821	collagen type I alpha 1 chain
COL1A2	ILMN_2104356	ENSG00000164692	collagen type I alpha 2 chain
COL3A1	ILMN_1773079	ENSG00000168542	collagen type III alpha 1 chain
COL5A1	ILMN_1706505	ENSG00000130635	collagen type V alpha 1 chain
COL6A1	ILMN_1732151	ENSG00000142156	collagen type VI alpha 1 chain
COL6A2	ILMN_1783909	ENSG00000142173	collagen type VI alpha 2 chain
COL6A3	ILMN_2307861	ENSG00000163359	collagen type VI alpha 3 chain
COL6A3	ILMN_1706643	ENSG00000163359	collagen type VI alpha 3 chain
COLCA1	ILMN_1727178	ENSG00000196167	colorectal cancer associated 1
COLEC12	ILMN_1689088	ENSG00000158270	collectin subfamily member 12
COLGALT1	ILMN_1727043	ENSG00000130309	collagen beta(1-O)galactosyltransferase 1
COLQ	ILMN_2329114	ENSG00000206561	collagen like tail subunit of asymmetric acetylcholinesterase
COLQ	ILMN_1695991	ENSG00000206561	collagen like tail subunit of asymmetric acetylcholinesterase
COMMD1	ILMN_1761242	ENSG00000173163	copper metabolism domain containing 1
COMMD3	ILMN_1690392	ENSG00000148444	COMM domain containing 3
COMMD3-BMI1	ILMN_1700915	ENSG00000269897	COMMD3-BMI1 readthrough
COMMD6	ILMN_1777378	ENSG00000188243	COMM domain containing 6
COMMD9	ILMN_1808821	ENSG00000110442	COMM domain containing 9
COMTD1	ILMN_1736752	ENSG00000165644	catechol-O-methyltransferase domain containing 1
COP1	ILMN_2408001	ENSG00000143207	COP1 E3 ubiquitin ligase
COPE	ILMN_1738103	ENSG00000105669	COPI coat complex subunit epsilon
COPS4	ILMN_1726755	ENSG00000138663	COP9 signalosome subunit 4
COPS6	ILMN_1764431	ENSG00000168090	COP9 signalosome subunit 6
COPS7A	ILMN_1758412	ENSG00000111652	COP9 signalosome subunit 7A
COPS7B	ILMN_1784785	ENSG00000144524	COP9 signalosome subunit 7B
COPZ1	ILMN_1728535	ENSG00000111481	COPI coat complex subunit zeta 1
COQ10A	ILMN_1666364	ENSG00000135469	coenzyme Q10A
COQ2	ILMN_1756572	ENSG00000173085	coenzyme Q2, polyprenyltransferase
COQ3	ILMN_1801378	ENSG00000132423	coenzyme Q3, methyltransferase
COQ5	ILMN_1770936	ENSG00000110871	coenzyme Q5, methyltransferase
COQ7	ILMN_1689070	ENSG00000167186	coenzyme Q7, hydroxylase
COQ8A	ILMN_1731064	ENSG00000163050	coenzyme Q8A
CORO1B	ILMN_1672417	ENSG00000172725	coronin 1B
CORO1B	ILMN_1653708	ENSG00000172725	coronin 1B
CORO2B	ILMN_2084836	ENSG00000103647	coronin 2B
CORO6	ILMN_1813386	ENSG00000167549	coronin 6
COX11	ILMN_1666280	ENSG00000166260	cytochrome c oxidase copper chaperone COX11
COX14	ILMN_1804656	ENSG00000178449	cytochrome c oxidase assembly factor COX14
COX16	ILMN_1706305	ENSG00000133983	cytochrome c oxidase assembly factor COX16
COX19	ILMN_1656656	ENSG00000240230	cytochrome c oxidase assembly factor COX19
COX20	ILMN_1808584	ENSG00000203667	cytochrome c oxidase assembly factor COX20
COX4I1	ILMN_1652207	ENSG00000131143	cytochrome c oxidase subunit 4I1
COX5B	ILMN_1663512	ENSG00000135940	cytochrome c oxidase subunit 5B
COX6C	ILMN_1654151	ENSG00000164919	cytochrome c oxidase subunit 6C
COX7A2	ILMN_1701293	ENSG00000112695	cytochrome c oxidase subunit 7A2
COX7C	ILMN_1798189	ENSG00000127184	cytochrome c oxidase subunit 7C
COX8A	ILMN_1809495	ENSG00000176340	cytochrome c oxidase subunit 8A
CPA3	ILMN_1766551	ENSG00000163751	carboxypeptidase A3
CPE	ILMN_1731374	ENSG00000109472	carboxypeptidase E
CPEB1	ILMN_1693345	ENSG00000214575	cytoplasmic polyadenylation element binding protein 1
CPEB1	ILMN_2369603	ENSG00000214575	cytoplasmic polyadenylation element binding protein 1
CPLX2	ILMN_1722695	ENSG00000145920	complexin 2
CPNE1	ILMN_1670841	ENSG00000214078	copine 1
CPNE3	ILMN_1773576	ENSG00000085719	copine 3
CPQ	ILMN_2058795	ENSG00000104324	carboxypeptidase Q
CPSF1	ILMN_1654545	ENSG00000071894	cleavage and polyadenylation specific factor 1
CPSF2	ILMN_2144116	ENSG00000165934	cleavage and polyadenylation specific factor 2
CPSF3	ILMN_2087528	ENSG00000119203	cleavage and polyadenylation specific factor 3
CPTP	ILMN_2234310	ENSG00000224051	ceramide-1-phosphate transfer protein
CPXM1	ILMN_1712046	ENSG00000088882	carboxypeptidase X, M14 family member 1
CPZ	ILMN_1705258	ENSG00000109625	carboxypeptidase Z
CPZ	ILMN_1690945	ENSG00000109625	carboxypeptidase Z
CRABP2	ILMN_1690170	ENSG00000143320	cellular retinoic acid binding protein 2
CRAMP1	ILMN_1660551	ENSG00000007545	cramped chromatin regulator homolog 1
CREBZF	ILMN_1784847	ENSG00000137504	CREB/ATF bZIP transcription factor
CRELD1	ILMN_1798790	ENSG00000163703	cysteine rich with EGF like domains 1
CRELD2	ILMN_1748707	ENSG00000184164	cysteine rich with EGF like domains 2
CRNKL1	ILMN_1768640	ENSG00000101343	crooked neck pre-mRNA splicing factor 1
CROT	ILMN_1693090	ENSG00000005469	carnitine O-octanoyltransferase
CRTC2	ILMN_1657771	ENSG00000160741	CREB regulated transcription coactivator 2
CRYGS	ILMN_1792597	ENSG00000213139	crystallin gamma S
CRYL1	ILMN_1714397	ENSG00000165475	crystallin lambda 1
CRYM	ILMN_1779241	ENSG00000103316	crystallin mu
CRYZ	ILMN_1672389	ENSG00000116791	crystallin zeta
CS	ILMN_1706057	ENSG00000062485	citrate synthase
CSE1L	ILMN_1665797	ENSG00000124207	chromosome segregation 1 like
CSE1L	ILMN_1706238	ENSG00000124207	chromosome segregation 1 like
CSNK1G1	ILMN_1704713	ENSG00000169118	casein kinase 1 gamma 1
CSNK2A2	ILMN_1723843	ENSG00000070770	casein kinase 2 alpha 2
CSNK2B	ILMN_1800461	ENSG00000204435	casein kinase 2 beta
CSTF3	ILMN_1806951	ENSG00000176102	cleavage stimulation factor subunit 3
CTBP1	ILMN_1719158	ENSG00000159692	C-terminal binding protein 1
CTDNEP1	ILMN_2133638	ENSG00000175826	CTD nuclear envelope phosphatase 1
CTDSP1	ILMN_1728163	ENSG00000144579	CTD small phosphatase 1
CTDSP2	ILMN_1692962	ENSG00000175215	CTD small phosphatase 2
CTDSPL	ILMN_2392189	ENSG00000144677	CTD small phosphatase like
CTDSPL2	ILMN_2077758	ENSG00000137770	CTD small phosphatase like 2
CTHRC1	ILMN_2117508	ENSG00000164932	collagen triple helix repeat containing 1
CTNNBIP1	ILMN_2381168	ENSG00000178585	catenin beta interacting protein 1
CTNNBL1	ILMN_2063925	ENSG00000132792	catenin beta like 1
CTNS	ILMN_2290808	ENSG00000040531	cystinosin, lysosomal cystine transporter
CTPS2	ILMN_2392356	ENSG00000047230	CTP synthase 2
CTPS2	ILMN_2392352	ENSG00000047230	CTP synthase 2
CTSG	ILMN_1680424	ENSG00000100448	cathepsin G
CTSH	ILMN_1752451	ENSG00000103811	cathepsin H
CTSH	ILMN_2390853	ENSG00000103811	cathepsin H
CTSK	ILMN_1758895	ENSG00000143387	cathepsin K
CTSO	ILMN_1769633	ENSG00000256043	cathepsin O
CTXN1	ILMN_1759766	ENSG00000178531	cortexin 1
CUBN	ILMN_1755203	ENSG00000107611	cubilin
CUL2	ILMN_1669252	ENSG00000108094	cullin 2
CUL3	ILMN_1653670	ENSG00000036257	cullin 3
CUL4B	ILMN_2385161	ENSG00000158290	cullin 4B
CUL5	ILMN_2176955	ENSG00000166266	cullin 5
CUL7	ILMN_1672393	ENSG00000044090	cullin 7
CUL9	ILMN_1806010	ENSG00000112659	cullin 9
CUTA	ILMN_1712390	ENSG00000112514	cutA divalent cation tolerance homolog
CUTA	ILMN_2311989	ENSG00000112514	cutA divalent cation tolerance homolog
CWC15	ILMN_1713482	ENSG00000150316	CWC15 spliceosome associated protein homolog
CWF19L1	ILMN_1651886	ENSG00000095485	CWF19 like cell cycle control factor 1
CWF19L2	ILMN_1668498	ENSG00000152404	CWF19 like cell cycle control factor 2
CX3CR1	ILMN_2088437	ENSG00000168329	C-X3-C motif chemokine receptor 1
CXCL12	ILMN_1791447	ENSG00000107562	C-X-C motif chemokine ligand 12
CXCL12	ILMN_1689111	ENSG00000107562	C-X-C motif chemokine ligand 12
CXCR6	ILMN_1674640	ENSG00000172215	C-X-C motif chemokine receptor 6
CXXC1	ILMN_1691276	ENSG00000154832	CXXC finger protein 1
CXXC5	ILMN_1745256	ENSG00000171604	CXXC finger protein 5
CYC1	ILMN_1815115	ENSG00000179091	cytochrome c1
CYGB	ILMN_1758128	ENSG00000161544	cytoglobin
CYP27A1	ILMN_1704985	ENSG00000135929	cytochrome P450 family 27 subfamily A member 1
CYP27C1	ILMN_1657749	ENSG00000186684	cytochrome P450 family 27 subfamily C member 1
CYP2E1	ILMN_1665437	ENSG00000130649	cytochrome P450 family 2 subfamily E member 1
CYP2R1	ILMN_2119774	ENSG00000186104	cytochrome P450 family 2 subfamily R member 1
CYP3A5	ILMN_1810942	ENSG00000106258	cytochrome P450 family 3 subfamily A member 5
CYP4F12	ILMN_1809384	ENSG00000186204	cytochrome P450 family 4 subfamily F member 12
CYP4V2	ILMN_2054607	ENSG00000145476	cytochrome P450 family 4 subfamily V member 2
CYREN	ILMN_1740903	ENSG00000122783	cell cycle regulator of NHEJ
CZIB	ILMN_2082130	ENSG00000162384	CXXC motif containing zinc binding protein
D2HGDH	ILMN_2206272	ENSG00000180902	D-2-hydroxyglutarate dehydrogenase
DAB2	ILMN_2128428	ENSG00000153071	DAB adaptor protein 2
DACT2	ILMN_1691790	ENSG00000164488	dishevelled binding antagonist of beta catenin 2
DAD1	ILMN_1731619	ENSG00000129562	defender against cell death 1
DAPK2	ILMN_1791847	ENSG00000035664	death associated protein kinase 2
DARS1	ILMN_1813836	ENSG00000115866	aspartyl-tRNA synthetase 1
DBN1	ILMN_1769926	ENSG00000113758	drebrin 1
DBNL	ILMN_1698307	ENSG00000136279	drebrin like
DBP	ILMN_1715555	ENSG00000105516	D-box binding PAR bZIP transcription factor
DBR1	ILMN_2226314	ENSG00000138231	debranching RNA lariats 1
DBT	ILMN_1714990	ENSG00000137992	dihydrolipoamide branched chain transacylase E2
DCAF11	ILMN_2389376	ENSG00000100897	DDB1 and CUL4 associated factor 11
DCAF15	ILMN_2192620	ENSG00000132017	DDB1 and CUL4 associated factor 15
DCAF16	ILMN_1753440	ENSG00000163257	DDB1 and CUL4 associated factor 16
DCAF5	ILMN_1735402	ENSG00000139990	DDB1 and CUL4 associated factor 5
DCAF6	ILMN_1698985	ENSG00000143164	DDB1 and CUL4 associated factor 6
DCAF7	ILMN_1682264	ENSG00000136485	DDB1 and CUL4 associated factor 7
DCANP1	ILMN_1701911	ENSG00000251380	dendritic cell associated nuclear protein 1
DCDC1	ILMN_2209671	ENSG00000170959	doublecortin domain containing 1
DCLK1	ILMN_2165354	ENSG00000133083	doublecortin like kinase 1
DCLRE1A	ILMN_1734096	ENSG00000198924	DNA cross-link repair 1A
DCLRE1C	ILMN_1754211	ENSG00000152457	DNA cross-link repair 1C
DCN	ILMN_2347145	ENSG00000011465	decorin
DCN	ILMN_1683194	ENSG00000011465	decorin
DCP1B	ILMN_1743992	ENSG00000151065	decapping mRNA 1B
DCP2	ILMN_1669905	ENSG00000172795	decapping mRNA 2
DCTD	ILMN_2415011	ENSG00000129187	dCMP deaminase
DCTD	ILMN_1802456	ENSG00000129187	dCMP deaminase
DCTN1	ILMN_2412807	ENSG00000204843	dynactin subunit 1
DCTN2	ILMN_1662232	ENSG00000175203	dynactin subunit 2
DCTN3	ILMN_1786984	ENSG00000137100	dynactin subunit 3
DCTN3	ILMN_1762281	ENSG00000137100	dynactin subunit 3
DCUN1D2	ILMN_1692706	ENSG00000150401	defective in cullin neddylation 1 domain containing 2
DCXR	ILMN_1681437	ENSG00000169738	dicarbonyl and L-xylulose reductase
DDB1	ILMN_1775937	ENSG00000167986	damage specific DNA binding protein 1
DDIT4L	ILMN_1696537	ENSG00000145358	DNA damage inducible transcript 4 like
DDOST	ILMN_1734231	ENSG00000244038	dolichyl-diphosphooligosaccharide--protein glycosyltransferase non-catalytic subunit
DDX17	ILMN_1774513	ENSG00000100201	DEAD-box helicase 17
DDX19B	ILMN_2381841	ENSG00000157349	DEAD-box helicase 19B
DDX39B	ILMN_1686626	ENSG00000198563	DExD-box helicase 39B
DDX42	ILMN_1695983	ENSG00000198231	DEAD-box helicase 42
DDX46	ILMN_1727001	ENSG00000145833	DEAD-box helicase 46
DDX50	ILMN_1712320	ENSG00000107625	DExD-box helicase 50
DECR1	ILMN_1720838	ENSG00000104325	2,4-dienoyl-CoA reductase 1
DEFB119	ILMN_1725640	ENSG00000180483	defensin beta 119
DELE1	ILMN_1762990	ENSG00000081791	DAP3 binding cell death enhancer 1
DENND11	ILMN_2355033	ENSG00000257093	DENN domain containing 11
DENND2A	ILMN_1666503	ENSG00000146966	DENN domain containing 2A
DENND2B	ILMN_1686988	ENSG00000166444	DENN domain containing 2B
DENND2B	ILMN_2350183	ENSG00000166444	DENN domain containing 2B
DENND2B	ILMN_1773470	ENSG00000166444	DENN domain containing 2B
DENND2D	ILMN_1707088	ENSG00000162777	DENN domain containing 2D
DENND4C	ILMN_1669599	ENSG00000137145	DENN domain containing 4C
DENND6A	ILMN_1713178	ENSG00000174839	DENN domain containing 6A
DENND6B	ILMN_1659029	ENSG00000205593	DENN domain containing 6B
DENR	ILMN_2168952	ENSG00000139726	density regulated re-initiation and release factor
DEPDC1	ILMN_2222567	ENSG00000024526	DEP domain containing 1
DEPDC7	ILMN_1718152	ENSG00000121690	DEP domain containing 7
DERA	ILMN_1811551	ENSG00000023697	deoxyribose-phosphate aldolase
DERL2	ILMN_1761969	ENSG00000072849	derlin 2
DET1	ILMN_2145423	ENSG00000140543	DET1 partner of COP1 E3 ubiquitin ligase
DEXI	ILMN_1738866	ENSG00000182108	Dexi homolog
DFFB	ILMN_1678962	ENSG00000169598	DNA fragmentation factor subunit beta
DGCR2	ILMN_1713301	ENSG00000070413	DiGeorge syndrome critical region gene 2
DGKZ	ILMN_2349393	ENSG00000149091	diacylglycerol kinase zeta
DGKZ	ILMN_2261876	ENSG00000149091	diacylglycerol kinase zeta
DGUOK	ILMN_1743432	ENSG00000114956	deoxyguanosine kinase
DGUOK	ILMN_2312897	ENSG00000114956	deoxyguanosine kinase
DHFR2	ILMN_2078659	ENSG00000178700	dihydrofolate reductase 2
DHPS	ILMN_2326997	ENSG00000095059	deoxyhypusine synthase
DHRS1	ILMN_1807206	ENSG00000157379	dehydrogenase/reductase 1
DHRS12	ILMN_1719915	ENSG00000102796	dehydrogenase/reductase 12
DHRS3	ILMN_1752478	ENSG00000162496	dehydrogenase/reductase 3
DHRS4	ILMN_2185884	ENSG00000157326	dehydrogenase/reductase 4
DHRS7	ILMN_1807455	ENSG00000100612	dehydrogenase/reductase 7
DHRSX	ILMN_1704139	ENSG00000169084	dehydrogenase/reductase X-linked
DHRSX	ILMN_1704139	ENSG00000292338	dehydrogenase/reductase X-linked
DHX16	ILMN_1716922	ENSG00000204560	DEAH-box helicase 16
DHX35	ILMN_1733667	ENSG00000101452	DEAH-box helicase 35
DHX40	ILMN_2248589	ENSG00000108406	DEAH-box helicase 40
DHX58	ILMN_1678422	ENSG00000108771	DExH-box helicase 58
DIABLO	ILMN_2310589	ENSG00000184047	diablo IAP-binding mitochondrial protein
DIDO1	ILMN_1812934	ENSG00000101191	death inducer-obliterator 1
DIDO1	ILMN_1763605	ENSG00000101191	death inducer-obliterator 1
DIP2B	ILMN_2180352	ENSG00000066084	disco interacting protein 2 homolog B
DISP1	ILMN_1695745	ENSG00000154309	dispatched RND transporter family member 1
DMAC1	ILMN_1769409	ENSG00000137038	distal membrane arm assembly component 1
DMAC2	ILMN_1809027	ENSG00000105341	distal membrane arm assembly component 2
DMAP1	ILMN_2328813	ENSG00000178028	DNA methyltransferase 1 associated protein 1
DMAP1	ILMN_1773885	ENSG00000178028	DNA methyltransferase 1 associated protein 1
DMTF1	ILMN_2119486	ENSG00000135164	cyclin D binding myb like transcription factor 1
DNAH1	ILMN_1685052	ENSG00000114841	dynein axonemal heavy chain 1
DNAJA3	ILMN_1662334	ENSG00000103423	DnaJ heat shock protein family (Hsp40) member A3
DNAJB2	ILMN_2390974	ENSG00000135924	DnaJ heat shock protein family (Hsp40) member B2
DNAJC10	ILMN_2151541	ENSG00000077232	DnaJ heat shock protein family (Hsp40) member C10
DNAJC13	ILMN_1752281	ENSG00000138246	DnaJ heat shock protein family (Hsp40) member C13
DNAJC17	ILMN_1703573	ENSG00000104129	DnaJ heat shock protein family (Hsp40) member C17
DNAJC19	ILMN_1742109	ENSG00000205981	DnaJ heat shock protein family (Hsp40) member C19
DNAJC30	ILMN_1771824	ENSG00000176410	DnaJ heat shock protein family (Hsp40) member C30
DNAJC7	ILMN_1663616	ENSG00000168259	DnaJ heat shock protein family (Hsp40) member C7
DNAJC8	ILMN_1698258	ENSG00000126698	DnaJ heat shock protein family (Hsp40) member C8
DNAJC9	ILMN_1799516	ENSG00000213551	DnaJ heat shock protein family (Hsp40) member C9
DNAL4	ILMN_1801845	ENSG00000100246	dynein axonemal light chain 4
DNASE1L2	ILMN_1720287	ENSG00000167968	deoxyribonuclease 1 like 2
DNM1	ILMN_1805200	ENSG00000106976	dynamin 1
DOCK1	ILMN_1715789	ENSG00000150760	dedicator of cytokinesis 1
DOK4	ILMN_1774261	ENSG00000125170	docking protein 4
DOLK	ILMN_1753627	ENSG00000175283	dolichol kinase
DOP1A	ILMN_1739156	ENSG00000083097	DOP1 leucine zipper like protein A
DPCD	ILMN_2047112	ENSG00000166171	deleted in primary ciliary dyskinesia homolog (mouse)
DPF2	ILMN_1734317	ENSG00000133884	double PHD fingers 2
DPH5	ILMN_1770048	ENSG00000117543	diphthamide biosynthesis 5
DPH6	ILMN_2140207	ENSG00000134146	diphthamine biosynthesis 6
DPM3	ILMN_2402674	ENSG00000179085	dolichyl-phosphate mannosyltransferase subunit 3, regulatory
DPP4	ILMN_1692535	ENSG00000197635	dipeptidyl peptidase 4
DPP7	ILMN_1811328	ENSG00000176978	dipeptidyl peptidase 7
DPP7	ILMN_2252309	ENSG00000176978	dipeptidyl peptidase 7
DPYD	ILMN_1795715	ENSG00000188641	dihydropyrimidine dehydrogenase
DPYSL2	ILMN_1672503	ENSG00000092964	dihydropyrimidinase like 2
DPYSL3	ILMN_1679262	ENSG00000113657	dihydropyrimidinase like 3
DR1	ILMN_1759983	ENSG00000117505	down-regulator of transcription 1
DRAM1	ILMN_1669376	ENSG00000136048	DNA damage regulated autophagy modulator 1
DRD4	ILMN_2112915	ENSG00000069696	dopamine receptor D4
DRG1	ILMN_1658259	ENSG00000185721	developmentally regulated GTP binding protein 1
DRG2	ILMN_1810531	ENSG00000108591	developmentally regulated GTP binding protein 2
DSN1	ILMN_1715905	ENSG00000149636	DSN1 component of MIS12 kinetochore complex
DTD1	ILMN_1774432	ENSG00000125821	D-aminoacyl-tRNA deacylase 1
DTNB	ILMN_1798819	ENSG00000138101	dystrobrevin beta
DTX2P1-UPK3BP1-PMS2P11	ILMN_1787931	ENSG00000265479	DTX2P1-UPK3BP1-PMS2P11 readthrough, transcribed pseudogene
DTX3	ILMN_1658677	ENSG00000178498	deltex E3 ubiquitin ligase 3
DUS2	ILMN_1811650	ENSG00000167264	dihydrouridine synthase 2
DUS4L	ILMN_1776858	ENSG00000105865	dihydrouridine synthase 4 like
DUSP12	ILMN_1767892	ENSG00000081721	dual specificity phosphatase 12
DUT	ILMN_2374778	ENSG00000128951	deoxyuridine triphosphatase
DUT	ILMN_1732688	ENSG00000128951	deoxyuridine triphosphatase
DVL2	ILMN_1652163	ENSG00000004975	dishevelled segment polarity protein 2
DXO	ILMN_1726990	ENSG00000204348	decapping exoribonuclease
DYM	ILMN_1680130	ENSG00000141627	dymeclin
DYNAP	ILMN_1746670	ENSG00000178690	dynactin associated protein
DYNC1I2	ILMN_1773847	ENSG00000077380	dynein cytoplasmic 1 intermediate chain 2
DYNC2H1	ILMN_2343310	ENSG00000187240	dynein cytoplasmic 2 heavy chain 1
DYNC2I1	ILMN_1793290	ENSG00000126870	dynein 2 intermediate chain 1
DYNLRB1	ILMN_2157435	ENSG00000125971	dynein light chain roadblock-type 1
DYRK1B	ILMN_1696991	ENSG00000105204	dual specificity tyrosine phosphorylation regulated kinase 1B
DYRK2	ILMN_2374244	ENSG00000127334	dual specificity tyrosine phosphorylation regulated kinase 2
DYRK4	ILMN_1681269	ENSG00000010219	dual specificity tyrosine phosphorylation regulated kinase 4
E4F1	ILMN_1720287	ENSG00000167967	E4F transcription factor 1
EAF1-AS1	ILMN_1695991	ENSG00000249786	EAF1 antisense RNA 1
EARS2	ILMN_1758750	ENSG00000103356	glutamyl-tRNA synthetase 2, mitochondrial
EBAG9	ILMN_1791896	ENSG00000147654	estrogen receptor binding site associated antigen 9
EBF1	ILMN_1778681	ENSG00000164330	EBF transcription factor 1
EBF3	ILMN_1707232	ENSG00000108001	EBF transcription factor 3
EBP	ILMN_2073604	ENSG00000147155	EBP cholestenol delta-isomerase
ECHDC2	ILMN_1671568	ENSG00000121310	enoyl-CoA hydratase domain containing 2
ECI1	ILMN_2049303	ENSG00000167969	enoyl-CoA delta isomerase 1
ECI2	ILMN_1761131	ENSG00000198721	enoyl-CoA delta isomerase 2
ECM1	ILMN_2329735	ENSG00000143369	extracellular matrix protein 1
ECPAS	ILMN_2261882	ENSG00000136813	Ecm29 proteasome adaptor and scaffold
ECSIT	ILMN_2233604	ENSG00000130159	ECSIT signaling integrator
EDA	ILMN_2381655	ENSG00000158813	ectodysplasin A
EDA	ILMN_1709975	ENSG00000158813	ectodysplasin A
EDC3	ILMN_1724581	ENSG00000179151	enhancer of mRNA decapping 3
EDF1	ILMN_2246894	ENSG00000107223	endothelial differentiation related factor 1
EDF1	ILMN_1726169	ENSG00000107223	endothelial differentiation related factor 1
EDNRA	ILMN_1796629	ENSG00000151617	endothelin receptor type A
EDRF1	ILMN_1791656	ENSG00000107938	erythroid differentiation regulatory factor 1
EEF1AKMT3	ILMN_1723846	ENSG00000123427	EEF1A lysine methyltransferase 3
EEF1B2	ILMN_2318725	ENSG00000114942	eukaryotic translation elongation factor 1 beta 2
EEF1B2	ILMN_1694587	ENSG00000114942	eukaryotic translation elongation factor 1 beta 2
EEF1B2P6	ILMN_2318725	ENSG00000213261	eukaryotic translation elongation factor 1 beta 2 pseudogene 6
EEF1D	ILMN_2408039	ENSG00000104529	eukaryotic translation elongation factor 1 delta
EEF1G	ILMN_2262288	ENSG00000254772	eukaryotic translation elongation factor 1 gamma
EEF2	ILMN_1738383	ENSG00000167658	eukaryotic translation elongation factor 2
EEF2K	ILMN_1789171	ENSG00000103319	eukaryotic elongation factor 2 kinase
EEIG1	ILMN_2401779	ENSG00000167106	estrogen-induced osteoclastogenesis regulator 1
EEIG1	ILMN_1745112	ENSG00000167106	estrogen-induced osteoclastogenesis regulator 1
EFEMP2	ILMN_1653203	ENSG00000172638	EGF containing fibulin extracellular matrix protein 2
EFHC1	ILMN_1755051	ENSG00000096093	EF-hand domain containing 1
EFNB1	ILMN_1654563	ENSG00000090776	ephrin B1
EFS	ILMN_1702105	ENSG00000100842	embryonal Fyn-associated substrate
EGFR	ILMN_1798975	ENSG00000146648	epidermal growth factor receptor
EI24	ILMN_1669394	ENSG00000149547	EI24 autophagy associated transmembrane protein
EID1	ILMN_1775269	ENSG00000255302	EP300 interacting inhibitor of differentiation 1
EIF2A	ILMN_1733305	ENSG00000144895	eukaryotic translation initiation factor 2A
EIF2B1	ILMN_1753716	ENSG00000111361	eukaryotic translation initiation factor 2B subunit alpha
EIF2B4	ILMN_1687430	ENSG00000115211	eukaryotic translation initiation factor 2B subunit delta
EIF2B4	ILMN_2356672	ENSG00000115211	eukaryotic translation initiation factor 2B subunit delta
EIF2D	ILMN_1712487	ENSG00000143486	eukaryotic translation initiation factor 2D
EIF2S3	ILMN_1665717	ENSG00000130741	eukaryotic translation initiation factor 2 subunit gamma
EIF3D	ILMN_1739847	ENSG00000100353	eukaryotic translation initiation factor 3 subunit D
EIF3E	ILMN_1739257	ENSG00000104408	eukaryotic translation initiation factor 3 subunit E
EIF3EP1	ILMN_1739257	ENSG00000234882	EIF3E pseudogene 1
EIF3F	ILMN_1694398	ENSG00000175390	eukaryotic translation initiation factor 3 subunit F
EIF3G	ILMN_1689446	ENSG00000130811	eukaryotic translation initiation factor 3 subunit G
EIF3H	ILMN_1683660	ENSG00000147677	eukaryotic translation initiation factor 3 subunit H
EIF3K	ILMN_1694057	ENSG00000178982	eukaryotic translation initiation factor 3 subunit K
EIF3L	ILMN_1762725	ENSG00000100129	eukaryotic translation initiation factor 3 subunit L
EIF4A2	ILMN_1685722	ENSG00000156976	eukaryotic translation initiation factor 4A2
EIF4B	ILMN_1655497	ENSG00000063046	eukaryotic translation initiation factor 4B
EIF4BP6	ILMN_1655497	ENSG00000197258	eukaryotic translation initiation factor 4B pseudogene 6
EIF4EBP1	ILMN_1767324	ENSG00000187840	eukaryotic translation initiation factor 4E binding protein 1
EIF4EBP2	ILMN_1728083	ENSG00000148730	eukaryotic translation initiation factor 4E binding protein 2
EIF4ENIF1	ILMN_1794967	ENSG00000184708	eukaryotic translation initiation factor 4E nuclear import factor 1
ELANE	ILMN_1706635	ENSG00000197561	elastase, neutrophil expressed
ELF2	ILMN_1691559	ENSG00000109381	E74 like ETS transcription factor 2
ELF2	ILMN_1772486	ENSG00000109381	E74 like ETS transcription factor 2
ELMO2	ILMN_2317730	ENSG00000062598	engulfment and cell motility 2
ELOB	ILMN_1733927	ENSG00000103363	elongin B
ELOF1	ILMN_1723185	ENSG00000130165	elongation factor 1
ELOVL4	ILMN_1737965	ENSG00000118402	ELOVL fatty acid elongase 4
ELOVL6	ILMN_2111187	ENSG00000170522	ELOVL fatty acid elongase 6
ELP2	ILMN_1709132	ENSG00000134759	elongator acetyltransferase complex subunit 2
ELP3	ILMN_1744068	ENSG00000134014	elongator acetyltransferase complex subunit 3
EMC4	ILMN_1798874	ENSG00000128463	ER membrane protein complex subunit 4
EMC9	ILMN_1755677	ENSG00000100908	ER membrane protein complex subunit 9
EMILIN1	ILMN_1711439	ENSG00000138080	elastin microfibril interfacer 1
EMX2	ILMN_2187746	ENSG00000170370	empty spiracles homeobox 2
ENAH	ILMN_1716552	ENSG00000154380	ENAH actin regulator
ENDOV	ILMN_1678705	ENSG00000173818	endonuclease V
ENKD1	ILMN_1787324	ENSG00000124074	enkurin domain containing 1
ENO2	ILMN_1765796	ENSG00000111674	enolase 2
ENOPH1	ILMN_1711878	ENSG00000145293	enolase-phosphatase 1
ENOX2	ILMN_2415911	ENSG00000165675	ecto-NOX disulfide-thiol exchanger 2
ENTPD8	ILMN_2298988	ENSG00000188833	ectonucleoside triphosphate diphosphohydrolase 8
EOMES	ILMN_1760509	ENSG00000163508	eomesodermin
EP400	ILMN_1673023	ENSG00000183495	E1A binding protein p400
EPG5	ILMN_1762608	ENSG00000152223	ectopic P-granules 5 autophagy tethering factor
EPM2AIP1	ILMN_1682658	ENSG00000178567	EPM2A interacting protein 1
EPN1	ILMN_1772981	ENSG00000063245	epsin 1
EPRS1	ILMN_1783695	ENSG00000136628	glutamyl-prolyl-tRNA synthetase 1
EPS15	ILMN_1665357	ENSG00000085832	epidermal growth factor receptor pathway substrate 15
ERAL1	ILMN_1718706	ENSG00000132591	Era like 12S mitochondrial rRNA chaperone 1
ERCC1	ILMN_2277676	ENSG00000012061	ERCC excision repair 1, endonuclease non-catalytic subunit
ERCC2	ILMN_1815859	ENSG00000104884	ERCC excision repair 2, TFIIH core complex helicase subunit
ERCC3	ILMN_1740216	ENSG00000163161	ERCC excision repair 3, TFIIH core complex helicase subunit
ERCC5	ILMN_1795495	ENSG00000134899	ERCC excision repair 5, endonuclease
ERCC6	ILMN_1737416	ENSG00000225830	ERCC excision repair 6, chromatin remodeling factor
ERCC6L2	ILMN_1753190	ENSG00000182150	ERCC excision repair 6 like 2
ERGIC3	ILMN_2359456	ENSG00000125991	ERGIC and golgi 3
ERGIC3	ILMN_2359453	ENSG00000125991	ERGIC and golgi 3
ERH	ILMN_1781795	ENSG00000100632	ERH mRNA splicing and mitosis factor
ERLEC1	ILMN_1724376	ENSG00000068912	endoplasmic reticulum lectin 1
ERMARD	ILMN_1657064	ENSG00000130023	ER membrane associated RNA degradation
ERP27	ILMN_1655261	ENSG00000139055	endoplasmic reticulum protein 27
ERP29	ILMN_2323048	ENSG00000089248	endoplasmic reticulum protein 29
ERP44	ILMN_2115379	ENSG00000023318	endoplasmic reticulum protein 44
ESCO1	ILMN_1682233	ENSG00000141446	establishment of sister chromatid cohesion N-acetyltransferase 1
ESD	ILMN_1669818	ENSG00000139684	esterase D
ESR1	ILMN_1678535	ENSG00000091831	estrogen receptor 1
ETV5	ILMN_1739222	ENSG00000244405	ETS variant transcription factor 5
ETAA1	ILMN_1780996	ENSG00000143971	ETAA1 activator of ATR kinase
EVL	ILMN_1730622	ENSG00000196405	Enah/Vasp-like
EWSR1	ILMN_1727041	ENSG00000182944	EWS RNA binding protein 1
EXOC1	ILMN_2347807	ENSG00000090989	exocyst complex component 1
EXOSC1	ILMN_2396648	ENSG00000171311	exosome component 1
EXOSC10	ILMN_2402168	ENSG00000171824	exosome component 10
EXOSC10	ILMN_1670796	ENSG00000171824	exosome component 10
EXOSC10	ILMN_1711189	ENSG00000171824	exosome component 10
EXOSC7	ILMN_1682176	ENSG00000075914	exosome component 7
EXOSC7	ILMN_2055477	ENSG00000075914	exosome component 7
EXOSC8	ILMN_1756162	ENSG00000120699	exosome component 8
EXPH5	ILMN_1712066	ENSG00000110723	exophilin 5
F10	ILMN_1670708	ENSG00000126218	coagulation factor X
F8A1	ILMN_1790249	ENSG00000288722	coagulation factor VIII associated 1
FAM104B	ILMN_1705848	ENSG00000182518	family with sequence similarity 104 member B
FAM111A	ILMN_1778845	ENSG00000166801	FAM111 trypsin like peptidase A
FAM111A	ILMN_2410038	ENSG00000166801	FAM111 trypsin like peptidase A
FAM117A	ILMN_1745533	ENSG00000121104	family with sequence similarity 117 member A
FAM117B	ILMN_1739942	ENSG00000138439	family with sequence similarity 117 member B
FAM120A	ILMN_2163306	ENSG00000048828	family with sequence similarity 120A
FAM124B	ILMN_1749878	ENSG00000124019	family with sequence similarity 124 member B
FAM133B	ILMN_1777745	ENSG00000234545	family with sequence similarity 133 member B
FAM136A	ILMN_1655307	ENSG00000035141	family with sequence similarity 136 member A
FAM13A	ILMN_2401253	ENSG00000138640	family with sequence similarity 13 member A
FAM13B	ILMN_1673478	ENSG00000031003	family with sequence similarity 13 member B
FAM13C	ILMN_2409055	ENSG00000148541	family with sequence similarity 13 member C
FAM13C	ILMN_1752343	ENSG00000148541	family with sequence similarity 13 member C
FAM153CP	ILMN_2053546	ENSG00000204677	family with sequence similarity 153 member C, pseudogene
FAM161A	ILMN_2120072	ENSG00000170264	FAM161 centrosomal protein A
FAM172A	ILMN_1654542	ENSG00000113391	family with sequence similarity 172 member A
FAM174B	ILMN_1652797	ENSG00000185442	family with sequence similarity 174 member B
FAM181B	ILMN_1735502	ENSG00000182103	family with sequence similarity 181 member B
FAM200C	ILMN_1727553	ENSG00000221886	family with sequence similarity 200 member C
FAM210B	ILMN_1708016	ENSG00000124098	family with sequence similarity 210 member B
FAM217B	ILMN_1718712	ENSG00000196227	family with sequence similarity 217 member B
FAM219B	ILMN_1657744	ENSG00000178761	family with sequence similarity 219 member B
FAM220A	ILMN_1717219	ENSG00000178397	family with sequence similarity 220 member A
FAM220CP	ILMN_1717219	ENSG00000213612	family with sequence similarity 220 member C, pseudogene
FAM24B	ILMN_2140799	ENSG00000213185	family with sequence similarity 24 member B
FAM3A	ILMN_1808356	ENSG00000071889	FAM3 metabolism regulating signaling molecule A
FAM50A	ILMN_1725130	ENSG00000071859	family with sequence similarity 50 member A
FAM50B	ILMN_2153466	ENSG00000145945	family with sequence similarity 50 member B
FAM76B	ILMN_2130514	ENSG00000077458	family with sequence similarity 76 member B
FAM83E	ILMN_2230624	ENSG00000105523	family with sequence similarity 83 member E
FAM8A1	ILMN_1807448	ENSG00000137414	family with sequence similarity 8 member A1
FAM98C	ILMN_1771870	ENSG00000130244	family with sequence similarity 98 member C
FANCE	ILMN_2043452	ENSG00000112039	FA complementation group E
FANCG	ILMN_1758728	ENSG00000221829	FA complementation group G
FAP	ILMN_2232854	ENSG00000078098	fibroblast activation protein alpha
FASLG	ILMN_1781824	ENSG00000117560	Fas ligand
FASTK	ILMN_1664098	ENSG00000164896	Fas activated serine/threonine kinase
FASTK	ILMN_2407464	ENSG00000164896	Fas activated serine/threonine kinase
FAU	ILMN_1664614	ENSG00000149806	FAU ubiquitin like and ribosomal protein S30 fusion
FAXDC2	ILMN_1728742	ENSG00000170271	fatty acid hydroxylase domain containing 2
FBH1	ILMN_1729430	ENSG00000134452	F-box DNA helicase 1
FBL	ILMN_1719205	ENSG00000105202	fibrillarin
FBLN1	ILMN_1700541	ENSG00000077942	fibulin 1
FBLN1	ILMN_1672536	ENSG00000077942	fibulin 1
FBLN7	ILMN_1735743	ENSG00000144152	fibulin 7
FBXL14	ILMN_1767441	ENSG00000171823	F-box and leucine rich repeat protein 14
FBXL15	ILMN_1663379	ENSG00000107872	F-box and leucine rich repeat protein 15
FBXL4	ILMN_1671393	ENSG00000112234	F-box and leucine rich repeat protein 4
FBXO17	ILMN_2368535	ENSG00000269190	F-box protein 17
FBXO21	ILMN_2358647	ENSG00000135108	F-box protein 21
FBXO21	ILMN_1745887	ENSG00000135108	F-box protein 21
FBXO31	ILMN_1771139	ENSG00000103264	F-box protein 31
FBXO4	ILMN_1656691	ENSG00000151876	F-box protein 4
FBXW8	ILMN_2342793	ENSG00000174989	F-box and WD repeat domain containing 8
FCGR2A	ILMN_1706523	ENSG00000143226	Fc gamma receptor IIa
FCGRT	ILMN_1705302	ENSG00000104870	Fc gamma receptor and transporter
FCHO2	ILMN_1670322	ENSG00000157107	FCH and mu domain containing endocytic adaptor 2
FCRLB	ILMN_1782015	ENSG00000162746	Fc receptor like B
FCSK	ILMN_1704195	ENSG00000157353	fucose kinase
FECH	ILMN_1774091	ENSG00000066926	ferrochelatase
FGD1	ILMN_1764314	ENSG00000102302	FYVE, RhoGEF and PH domain containing 1
FGF7	ILMN_1731240	ENSG00000140285	fibroblast growth factor 7
FGFBP2	ILMN_1761945	ENSG00000137441	fibroblast growth factor binding protein 2
FGG	ILMN_1703188	ENSG00000171557	fibrinogen gamma chain
FHDC1	ILMN_1699206	ENSG00000137460	FH2 domain containing 1
FHIP2A	ILMN_1752927	ENSG00000151553	FHF complex subunit HOOK interacting protein 2A
FHOD3	ILMN_1761322	ENSG00000134775	formin homology 2 domain containing 3
FIBP	ILMN_1657797	ENSG00000172500	FGF1 intracellular binding protein
FIG4	ILMN_1800889	ENSG00000112367	FIG4 phosphoinositide 5-phosphatase
FIGNL1	ILMN_1778152	ENSG00000132436	fidgetin like 1
FIRRM	ILMN_1727540	ENSG00000000460	FIGNL1 interacting regulator of recombination and mitosis
FKBP10	ILMN_1659905	ENSG00000141756	FKBP prolyl isomerase 10
FKBP2	ILMN_1674337	ENSG00000173486	FKBP prolyl isomerase 2
FKBP7	ILMN_1717737	ENSG00000079150	FKBP prolyl isomerase 7
FKBP9P1	ILMN_2089977	ENSG00000176826	FKBP prolyl isomerase 9 pseudogene 1
FKBP9P1	ILMN_2089977	ENSG00000291029	FKBP prolyl isomerase 9 pseudogene 1
FLRT2	ILMN_1769615	ENSG00000185070	fibronectin leucine rich transmembrane protein 2
FLT3LG	ILMN_2091412	ENSG00000090554	fms related receptor tyrosine kinase 3 ligand
FLYWCH1	ILMN_1690035	ENSG00000059122	FLYWCH-type zinc finger 1
FMO1	ILMN_1684401	ENSG00000010932	flavin containing dimethylaniline monoxygenase 1
FMO4	ILMN_1677885	ENSG00000076258	flavin containing dimethylaniline monoxygenase 4
FNBP1	ILMN_1797342	ENSG00000187239	formin binding protein 1
FNDC1	ILMN_2163873	ENSG00000164694	fibronectin type III domain containing 1
FNDC5	ILMN_1761084	ENSG00000160097	fibronectin type III domain containing 5
FOLR2	ILMN_1745963	ENSG00000165457	folate receptor beta
FOXJ2	ILMN_1731648	ENSG00000065970	forkhead box J2
FOXJ3	ILMN_2128668	ENSG00000198815	forkhead box J3
FOXK1	ILMN_2082244	ENSG00000164916	forkhead box K1
FOXN2	ILMN_1736510	ENSG00000170802	forkhead box N2
FOXRED1	ILMN_1762312	ENSG00000110074	FAD dependent oxidoreductase domain containing 1
FOXRED2	ILMN_2130635	ENSG00000100350	FAD dependent oxidoreductase domain containing 2
FPGT	ILMN_1727878	ENSG00000254685	fucose-1-phosphate guanylyltransferase
FRA10AC1	ILMN_1765480	ENSG00000148690	FRA10A associated CGG repeat 1
FRAS1	ILMN_1806667	ENSG00000138759	Fraser extracellular matrix complex subunit 1
FRG1	ILMN_1734696	ENSG00000109536	FSHD region gene 1
FRMD6	ILMN_1769282	ENSG00000139926	FERM domain containing 6
FRMD6	ILMN_2330787	ENSG00000139926	FERM domain containing 6
FRS3	ILMN_1772605	ENSG00000137218	fibroblast growth factor receptor substrate 3
FSCN1	ILMN_1808707	ENSG00000075618	fascin actin-bundling protein 1
FSCN3	ILMN_1752340	ENSG00000106328	fascin actin-bundling protein 3
FSTL1	ILMN_2201678	ENSG00000163430	follistatin like 1
FUCA1	ILMN_1752728	ENSG00000179163	alpha-L-fucosidase 1
FUNDC1	ILMN_1728540	ENSG00000069509	FUN14 domain containing 1
FUOM	ILMN_1704785	ENSG00000148803	fucose mutarotase
FUT10	ILMN_2163906	ENSG00000172728	fucosyltransferase 10
FUT4	ILMN_1792072	ENSG00000196371	fucosyltransferase 4
FUT8	ILMN_1741422	ENSG00000033170	fucosyltransferase 8
FXYD1	ILMN_2345292	ENSG00000266964	FXYD domain containing ion transport regulator 1
FXYD1	ILMN_1789463	ENSG00000266964	FXYD domain containing ion transport regulator 1
FYN	ILMN_2249920	ENSG00000010810	FYN proto-oncogene, Src family tyrosine kinase
FZD2	ILMN_1653711	ENSG00000180340	frizzled class receptor 2
FAAP100	ILMN_1711823	ENSG00000185504	FA core complex associated protein 100
GAB3	ILMN_1805979	ENSG00000160219	GRB2 associated binding protein 3
GABARAP	ILMN_2050109	ENSG00000170296	GABA type A receptor-associated protein
GABRE	ILMN_1784706	ENSG00000102287	gamma-aminobutyric acid type A receptor subunit epsilon
GALC	ILMN_1799744	ENSG00000054983	galactosylceramidase
GALK2	ILMN_1723124	ENSG00000156958	galactokinase 2
GALM	ILMN_1671482	ENSG00000143891	galactose mutarotase
GALNT11	ILMN_1651819	ENSG00000178234	polypeptide N-acetylgalactosaminyltransferase 11
GALNT12	ILMN_1735157	ENSG00000119514	polypeptide N-acetylgalactosaminyltransferase 12
GALNT16	ILMN_2077952	ENSG00000100626	polypeptide N-acetylgalactosaminyltransferase 16
GALNT6	ILMN_1677574	ENSG00000139629	polypeptide N-acetylgalactosaminyltransferase 6
GALT	ILMN_1706005	ENSG00000213930	galactose-1-phosphate uridylyltransferase
GALT	ILMN_1657475	ENSG00000213930	galactose-1-phosphate uridylyltransferase
GAMT	ILMN_1756469	ENSG00000130005	guanidinoacetate N-methyltransferase
GARNL3	ILMN_1779347	ENSG00000136895	GTPase activating Rap/RanGAP domain like 3
GAS1	ILMN_2062701	ENSG00000180447	growth arrest specific 1
GAS6	ILMN_1784749	ENSG00000183087	growth arrest specific 6
GAS6	ILMN_1779558	ENSG00000183087	growth arrest specific 6
GAS7	ILMN_1745994	ENSG00000007237	growth arrest specific 7
GATA2	ILMN_2102670	ENSG00000179348	GATA binding protein 2
GATA3	ILMN_2406656	ENSG00000107485	GATA binding protein 3
GATAD1	ILMN_1710863	ENSG00000157259	GATA zinc finger domain containing 1
GATD1	ILMN_1752197	ENSG00000177225	glutamine amidotransferase class 1 domain containing 1
GATD3	ILMN_1737588	ENSG00000160221	glutamine amidotransferase class 1 domain containing 3
GATM	ILMN_1729180	ENSG00000171766	glycine amidinotransferase
GBP2	ILMN_1774077	ENSG00000162645	guanylate binding protein 2
GCHFR	ILMN_1694780	ENSG00000137880	GTP cyclohydrolase I feedback regulator
GDE1	ILMN_1728698	ENSG00000006007	glycerophosphodiester phosphodiesterase 1
GDI2	ILMN_1754178	ENSG00000057608	GDP dissociation inhibitor 2
GEMIN2	ILMN_2344002	ENSG00000092208	gem nuclear organelle associated protein 2
GEMIN6	ILMN_1707484	ENSG00000152147	gem nuclear organelle associated protein 6
GEMIN8	ILMN_2364088	ENSG00000046647	gem nuclear organelle associated protein 8
GFRA1	ILMN_2334359	ENSG00000151892	GDNF family receptor alpha 1
GFRA1	ILMN_1725678	ENSG00000151892	GDNF family receptor alpha 1
GFRA2	ILMN_1656300	ENSG00000168546	GDNF family receptor alpha 2
GGA2	ILMN_1686152	ENSG00000103365	golgi associated, gamma adaptin ear containing, ARF binding protein 2
GGA3	ILMN_1675982	ENSG00000125447	golgi associated, gamma adaptin ear containing, ARF binding protein 3
GGA3	ILMN_2402972	ENSG00000125447	golgi associated, gamma adaptin ear containing, ARF binding protein 3
GGNBP2	ILMN_1725620	ENSG00000278311	gametogenetin binding protein 2
GHDC	ILMN_1746378	ENSG00000167925	GH3 domain containing
GHITM	ILMN_1728467	ENSG00000165678	growth hormone inducible transmembrane protein
GHRL	ILMN_1696380	ENSG00000157017	ghrelin and obestatin prepropeptide
GID8	ILMN_1755909	ENSG00000101193	GID complex subunit 8 homolog
GIGYF1	ILMN_1815639	ENSG00000146830	GRB10 interacting GYF protein 1
GIMAP1	ILMN_1757186	ENSG00000213203	GTPase, IMAP family member 1
GIMAP2	ILMN_2135272	ENSG00000106560	GTPase, IMAP family member 2
GIMAP4	ILMN_1748473	ENSG00000133574	GTPase, IMAP family member 4
GIMAP8	ILMN_1747305	ENSG00000171115	GTPase, IMAP family member 8
GIN1	ILMN_1814622	ENSG00000145723	gypsy retrotransposon integrase 1
GINS3	ILMN_1754272	ENSG00000181938	GINS complex subunit 3
GLE1	ILMN_1754912	ENSG00000119392	GLE1 RNA export mediator
GLG1	ILMN_1772261	ENSG00000090863	golgi glycoprotein 1
GLI2	ILMN_1727577	ENSG00000074047	GLI family zinc finger 2
GLI3	ILMN_1771962	ENSG00000106571	GLI family zinc finger 3
GLIS3	ILMN_2402600	ENSG00000107249	GLIS family zinc finger 3
GLMN	ILMN_1739397	ENSG00000174842	glomulin, FKBP associated protein
GLMP	ILMN_1698243	ENSG00000198715	glycosylated lysosomal membrane protein
GLOD4	ILMN_1738656	ENSG00000167699	glyoxalase domain containing 4
GLT8D1	ILMN_2386891	ENSG00000016864	glycosyltransferase 8 domain containing 1
GLT8D1	ILMN_1713290	ENSG00000016864	glycosyltransferase 8 domain containing 1
GLT8D2	ILMN_1802654	ENSG00000120820	glycosyltransferase 8 domain containing 2
GLYCTK	ILMN_1791222	ENSG00000168237	glycerate kinase
GMNN	ILMN_1720114	ENSG00000112312	geminin DNA replication inhibitor
GMPR2	ILMN_1677919	ENSG00000100938	guanosine monophosphate reductase 2
GMPR2	ILMN_2365595	ENSG00000100938	guanosine monophosphate reductase 2
GNAI2	ILMN_1775762	ENSG00000114353	G protein subunit alpha i2
GNPAT	ILMN_1699859	ENSG00000116906	glyceronephosphate O-acyltransferase
GNPDA1	ILMN_1784709	ENSG00000113552	glucosamine-6-phosphate deaminase 1
GNPTG	ILMN_1764230	ENSG00000090581	N-acetylglucosamine-1-phosphate transferase subunit gamma
GNRH1	ILMN_1745991	ENSG00000147437	gonadotropin releasing hormone 1
GOLGA2	ILMN_1738821	ENSG00000167110	golgin A2
GOLGA7	ILMN_1778673	ENSG00000147533	golgin A7
GOLPH3L	ILMN_1706764	ENSG00000143457	golgi phosphoprotein 3 like
GON4L	ILMN_1661138	ENSG00000116580	gon-4 like
GOPC	ILMN_2388585	ENSG00000047932	golgi associated PDZ and coiled-coil motif containing
GOT2	ILMN_1801348	ENSG00000125166	glutamic-oxaloacetic transaminase 2
GPATCH1	ILMN_1655625	ENSG00000076650	G-patch domain containing 1
GPATCH3	ILMN_1686929	ENSG00000198746	G-patch domain containing 3
GPATCH8	ILMN_1764617	ENSG00000186566	G-patch domain containing 8
GPC4	ILMN_1789502	ENSG00000076716	glypican 4
GPD1L	ILMN_1694106	ENSG00000152642	glycerol-3-phosphate dehydrogenase 1 like
GPHN	ILMN_1677962	ENSG00000171723	gephyrin
GPM6A	ILMN_1716869	ENSG00000150625	glycoprotein M6A
GPN1	ILMN_1772719	ENSG00000198522	GPN-loop GTPase 1
GPNMB	ILMN_2407389	ENSG00000136235	glycoprotein nmb
GPNMB	ILMN_1801205	ENSG00000136235	glycoprotein nmb
GPR78	ILMN_1705258	ENSG00000155269	G protein-coupled receptor 78
GPR78	ILMN_1690945	ENSG00000155269	G protein-coupled receptor 78
GPRASP2	ILMN_1754727	ENSG00000158301	G protein-coupled receptor associated sorting protein 2
GPRASP3	ILMN_1708131	ENSG00000198908	G protein-coupled receptor associated sorting protein family member 3
GPRC5B	ILMN_1786034	ENSG00000167191	G protein-coupled receptor class C group 5 member B
GPS1	ILMN_2309228	ENSG00000169727	G protein pathway suppressor 1
GPS1	ILMN_1795876	ENSG00000169727	G protein pathway suppressor 1
GPSM2	ILMN_2139816	ENSG00000121957	G protein signaling modulator 2
GPX7	ILMN_1726030	ENSG00000116157	glutathione peroxidase 7
GPX8	ILMN_1767665	ENSG00000164294	glutathione peroxidase 8 (putative)
GRAMD2B	ILMN_2065690	ENSG00000155324	GRAM domain containing 2B
GRAP	ILMN_2264011	ENSG00000154016	GRB2 related adaptor protein
GRIN1	ILMN_2321301	ENSG00000176884	glutamate ionotropic receptor NMDA type subunit 1
GRK5	ILMN_2096719	ENSG00000198873	G protein-coupled receptor kinase 5
GRN	ILMN_1811702	ENSG00000030582	granulin precursor
GRPEL2	ILMN_1721138	ENSG00000164284	GrpE like 2, mitochondrial
GRSF1	ILMN_1806601	ENSG00000132463	G-rich RNA sequence binding factor 1
GSC	ILMN_1655849	ENSG00000133937	goosecoid homeobox
GSDMB	ILMN_2347193	ENSG00000073605	gasdermin B
GSDMB	ILMN_1666206	ENSG00000073605	gasdermin B
GSDME	ILMN_1670145	ENSG00000105928	gasdermin E
GSPT2	ILMN_1730101	ENSG00000189369	G1 to S phase transition 2
GSTA4	ILMN_1771964	ENSG00000170899	glutathione S-transferase alpha 4
GSTP1	ILMN_1679809	ENSG00000084207	glutathione S-transferase pi 1
GTF2H4	ILMN_1800308	ENSG00000213780	general transcription factor IIH subunit 4
GTF3C2	ILMN_2356574	ENSG00000115207	general transcription factor IIIC subunit 2
GTF3C2	ILMN_1746457	ENSG00000115207	general transcription factor IIIC subunit 2
GTF3C3	ILMN_1789508	ENSG00000119041	general transcription factor IIIC subunit 3
GTF3C5	ILMN_1723895	ENSG00000148308	general transcription factor IIIC subunit 5
GTPBP3	ILMN_1748894	ENSG00000130299	GTP binding protein 3, mitochondrial
GUCA1B	ILMN_2211728	ENSG00000112599	guanylate cyclase activator 1B
GUK1	ILMN_1758398	ENSG00000143774	guanylate kinase 1
GUSB	ILMN_1669878	ENSG00000169919	glucuronidase beta
GUSBP13	ILMN_1662483	ENSG00000198237	GUSB pseudogene 13
GUSBP14	ILMN_1662483	ENSG00000253816	GUSB pseudogene 14
GUSBP15	ILMN_1662483	ENSG00000196302	GUSB pseudogene 15
GUSBP16	ILMN_1662483	ENSG00000253366	GUSB pseudogene 16
GUSBP17	ILMN_2133534	ENSG00000235558	GUSB pseudogene 17
GUSBP18	ILMN_1662483	ENSG00000215158	GUSB pseudogene 18
GUSBP3	ILMN_2133534	ENSG00000253203	GUSB pseudogene 3
GUSBP3	ILMN_1662483	ENSG00000253203	GUSB pseudogene 3
GYPC	ILMN_1668039	ENSG00000136732	glycophorin C (Gerbich blood group)
GYPC	ILMN_1682332	ENSG00000136732	glycophorin C (Gerbich blood group)
GZMA	ILMN_1779324	ENSG00000145649	granzyme A
GZMH	ILMN_1731233	ENSG00000100450	granzyme H
H1-0	ILMN_1757467	ENSG00000189060	H1.0 linker histone
H1-10	ILMN_1773964	ENSG00000184897	H1.10 linker histone
H2AJ	ILMN_2253065	ENSG00000246705	H2A.J histone
H2BC11	ILMN_1658702	ENSG00000124635	H2B clustered histone 11
H2BC14	ILMN_1736820	ENSG00000273703	H2B clustered histone 14
H4C3	ILMN_2075334	ENSG00000197061	H4 clustered histone 3
HADH	ILMN_1719906	ENSG00000138796	hydroxyacyl-CoA dehydrogenase
HAND2	ILMN_2064902	ENSG00000164107	heart and neural crest derivatives expressed 2
HARS1	ILMN_1763523	ENSG00000170445	histidyl-tRNA synthetase 1
HARS2	ILMN_1715113	ENSG00000112855	histidyl-tRNA synthetase 2, mitochondrial
HAUS4	ILMN_1771003	ENSG00000092036	HAUS augmin like complex subunit 4
HCFC1	ILMN_1732705	ENSG00000172534	host cell factor C1
HCFC1R1	ILMN_1757877	ENSG00000103145	host cell factor C1 regulator 1
HCFC1R1	ILMN_2318568	ENSG00000103145	host cell factor C1 regulator 1
HCRTR2	ILMN_1678065	ENSG00000137252	hypocretin receptor 2
HDAC2	ILMN_1767747	ENSG00000196591	histone deacetylase 2
HDAC3	ILMN_1772455	ENSG00000171720	histone deacetylase 3
HDAC4	ILMN_1764396	ENSG00000068024	histone deacetylase 4
HDDC2	ILMN_1753745	ENSG00000111906	HD domain containing 2
HDDC3	ILMN_1781638	ENSG00000184508	HD domain containing 3
HDGFL2	ILMN_1681927	ENSG00000167674	HDGF like 2
HDGFL2	ILMN_2325978	ENSG00000167674	HDGF like 2
HDHD2	ILMN_1702265	ENSG00000167220	haloacid dehalogenase like hydrolase domain containing 2
HDHD5	ILMN_1654690	ENSG00000069998	haloacid dehalogenase like hydrolase domain containing 5
HEATR5B	ILMN_2187487	ENSG00000008869	HEAT repeat containing 5B
HEATR6	ILMN_1791106	ENSG00000068097	HEAT repeat containing 6
HECTD2	ILMN_1668876	ENSG00000165338	HECT domain E3 ubiquitin protein ligase 2
HECTD2	ILMN_1726636	ENSG00000165338	HECT domain E3 ubiquitin protein ligase 2
HECTD3	ILMN_1656902	ENSG00000126107	HECT domain E3 ubiquitin protein ligase 3
HELQ	ILMN_1720440	ENSG00000163312	helicase, POLQ like
HEPH	ILMN_1714523	ENSG00000089472	hephaestin
HERC2	ILMN_1813475	ENSG00000128731	HECT and RLD domain containing E3 ubiquitin protein ligase 2
HERC2P4	ILMN_2058327	ENSG00000230267	HERC2 pseudogene 4
HERC2P5	ILMN_2058327	ENSG00000260644	HERC2 pseudogene 5
HERC2P8	ILMN_2058327	ENSG00000261599	HERC2 pseudogene 8
HERC4	ILMN_1770665	ENSG00000148634	HECT and RLD domain containing E3 ubiquitin protein ligase 4
HES2	ILMN_2094266	ENSG00000069812	hes family bHLH transcription factor 2
HESX1	ILMN_1742929	ENSG00000163666	HESX homeobox 1
HEXB	ILMN_1806692	ENSG00000049860	hexosaminidase subunit beta
HEXIM2	ILMN_1701006	ENSG00000168517	HEXIM P-TEFb complex subunit 2
HHEX	ILMN_1762712	ENSG00000152804	hematopoietically expressed homeobox
HIBADH	ILMN_1804150	ENSG00000106049	3-hydroxyisobutyrate dehydrogenase
HID1	ILMN_1654013	ENSG00000167861	HID1 domain containing
HIGD2A	ILMN_1774334	ENSG00000146066	HIG1 hypoxia inducible domain family member 2A
HIPK1	ILMN_1727532	ENSG00000163349	homeodomain interacting protein kinase 1
HIRIP3	ILMN_1678037	ENSG00000149929	HIRA interacting protein 3
HLA-DMA	ILMN_1695311	ENSG00000204257	major histocompatibility complex, class II, DM alpha
HLA-DMB	ILMN_1761733	ENSG00000242574	major histocompatibility complex, class II, DM beta
HLF	ILMN_1722829	ENSG00000108924	HLF transcription factor, PAR bZIP family member
HMG20A	ILMN_1678290	ENSG00000140382	high mobility group 20A
HMGB1	ILMN_2231242	ENSG00000189403	high mobility group box 1
HMGB2	ILMN_2219712	ENSG00000164104	high mobility group box 2
HMGCL	ILMN_2122420	ENSG00000117305	3-hydroxy-3-methylglutaryl-CoA lyase
HMGN1	ILMN_2151579	ENSG00000205581	high mobility group nucleosome binding domain 1
HMGN4	ILMN_1700518	ENSG00000182952	high mobility group nucleosomal binding domain 4
HNMT	ILMN_1713685	ENSG00000150540	histamine N-methyltransferase
HNMT	ILMN_2284744	ENSG00000150540	histamine N-methyltransferase
HNMT	ILMN_1790881	ENSG00000150540	histamine N-methyltransferase
HNMT	ILMN_1751789	ENSG00000150540	histamine N-methyltransferase
HNRNPA0	ILMN_1753279	ENSG00000177733	heterogeneous nuclear ribonucleoprotein A0
HNRNPA1L2	ILMN_2387742	ENSG00000139675	heterogeneous nuclear ribonucleoprotein A1 like 2
HNRNPA1P10	ILMN_2220283	ENSG00000214223	heterogeneous nuclear ribonucleoprotein A1 pseudogene 10
HNRNPD	ILMN_2321451	ENSG00000138668	heterogeneous nuclear ribonucleoprotein D
HNRNPDL	ILMN_1730572	ENSG00000152795	heterogeneous nuclear ribonucleoprotein D like
HNRNPUL1	ILMN_2395728	ENSG00000105323	heterogeneous nuclear ribonucleoprotein U like 1
HNRNPUL1	ILMN_1690268	ENSG00000105323	heterogeneous nuclear ribonucleoprotein U like 1
HNRNPUL2	ILMN_2072091	ENSG00000214753	heterogeneous nuclear ribonucleoprotein U like 2
HNRNPUL2-BSCL2	ILMN_1774596	ENSG00000234857	HNRNPUL2-BSCL2 readthrough (NMD candidate)
HOXA2	ILMN_2107068	ENSG00000105996	homeobox A2
HOXA3	ILMN_1760647	ENSG00000105997	homeobox A3
HOXA4	ILMN_1677018	ENSG00000197576	homeobox A4
HOXA5	ILMN_1753613	ENSG00000106004	homeobox A5
HOXA6	ILMN_1815570	ENSG00000106006	homeobox A6
HOXA9	ILMN_1702479	ENSG00000078399	homeobox A9
HOXA9	ILMN_1739582	ENSG00000078399	homeobox A9
HOXB2	ILMN_1810274	ENSG00000173917	homeobox B2
HOXB3	ILMN_1689874	ENSG00000120093	homeobox B3
HOXB5	ILMN_1674908	ENSG00000120075	homeobox B5
HOXB7	ILMN_1702125	ENSG00000260027	homeobox B7
HOXB8	ILMN_1798496	ENSG00000120068	homeobox B8
HOXC10	ILMN_1725899	ENSG00000180818	homeobox C10
HOXC4	ILMN_1719975	ENSG00000198353	homeobox C4
HOXC6	ILMN_2396039	ENSG00000197757	homeobox C6
HOXC6	ILMN_1794492	ENSG00000197757	homeobox C6
HOXC9	ILMN_1718898	ENSG00000180806	homeobox C9
HOXD12	ILMN_1783500	ENSG00000170178	homeobox D12
HOXD3	ILMN_1798076	ENSG00000128652	homeobox D3
HPF1	ILMN_1698677	ENSG00000056050	histone PARylation factor 1
HPGD	ILMN_2166457	ENSG00000164120	15-hydroxyprostaglandin dehydrogenase
HPS3	ILMN_1762224	ENSG00000163755	HPS3 biogenesis of lysosomal organelles complex 2 subunit 1
HPS6	ILMN_1718537	ENSG00000166189	HPS6 biogenesis of lysosomal organelles complex 2 subunit 3
HRK	ILMN_2193706	ENSG00000135116	harakiri, BCL2 interacting protein
HROB	ILMN_1776490	ENSG00000125319	homologous recombination factor with OB-fold
HS3ST2	ILMN_1712475	ENSG00000122254	heparan sulfate-glucosamine 3-sulfotransferase 2
HSCB	ILMN_2184789	ENSG00000100209	HscB mitochondrial iron-sulfur cluster cochaperone
HSD11B2	ILMN_1813350	ENSG00000176387	hydroxysteroid 11-beta dehydrogenase 2
HSD17B14	ILMN_1809483	ENSG00000087076	hydroxysteroid 17-beta dehydrogenase 14
HSD17B7	ILMN_1728048	ENSG00000132196	hydroxysteroid 17-beta dehydrogenase 7
HSD17B7P2	ILMN_1728048	ENSG00000099251	hydroxysteroid 17-beta dehydrogenase 7 pseudogene 2
HSD17B7P2	ILMN_1728048	ENSG00000290439	hydroxysteroid 17-beta dehydrogenase 7 pseudogene 2
HSD17B8	ILMN_1715324	ENSG00000204228	hydroxysteroid 17-beta dehydrogenase 8
HSF2	ILMN_1800311	ENSG00000025156	heat shock transcription factor 2
HSF4	ILMN_2399827	ENSG00000102878	heat shock transcription factor 4
HSPA12B	ILMN_1676897	ENSG00000132622	heat shock protein family A (Hsp70) member 12B
HSPBAP1	ILMN_1797031	ENSG00000169087	HSPB1 associated protein 1
HTR1B	ILMN_1814206	ENSG00000135312	5-hydroxytryptamine receptor 1B
HTRA2	ILMN_1785574	ENSG00000115317	HtrA serine peptidase 2
HYI	ILMN_1706660	ENSG00000178922	hydroxypyruvate isomerase (putative)
IARS2	ILMN_1671207	ENSG00000067704	isoleucyl-tRNA synthetase 2, mitochondrial
IBTK	ILMN_1675669	ENSG00000005700	inhibitor of Bruton tyrosine kinase
ICE2	ILMN_2346460	ENSG00000128915	interactor of little elongation complex ELL subunit 2
ID1	ILMN_1665832	ENSG00000125968	inhibitor of DNA binding 1
ID1	ILMN_1664861	ENSG00000125968	inhibitor of DNA binding 1
IDH2	ILMN_1751753	ENSG00000182054	isocitrate dehydrogenase (NADP(+)) 2
IDH3B	ILMN_1721669	ENSG00000101365	isocitrate dehydrogenase (NAD(+)) 3 non-catalytic subunit beta
IDH3B	ILMN_2373632	ENSG00000101365	isocitrate dehydrogenase (NAD(+)) 3 non-catalytic subunit beta
IDH3G	ILMN_1802706	ENSG00000067829	isocitrate dehydrogenase (NAD(+)) 3 non-catalytic subunit gamma
IER3IP1	ILMN_1763539	ENSG00000134049	immediate early response 3 interacting protein 1
IFFO1	ILMN_1790917	ENSG00000010295	intermediate filament family orphan 1
IFFO1	ILMN_2348268	ENSG00000010295	intermediate filament family orphan 1
IFI27L2	ILMN_1740319	ENSG00000119632	interferon alpha inducible protein 27 like 2
IFT122	ILMN_2366177	ENSG00000163913	intraflagellar transport 122
IFT122	ILMN_1742379	ENSG00000163913	intraflagellar transport 122
IFT172	ILMN_1784178	ENSG00000138002	intraflagellar transport 172
IFT25	ILMN_1681340	ENSG00000081870	intraflagellar transport 25
IFT52	ILMN_2063500	ENSG00000101052	intraflagellar transport 52
IFT74	ILMN_1777449	ENSG00000096872	intraflagellar transport 74
IFT88	ILMN_1666560	ENSG00000032742	intraflagellar transport 88
IGBP1	ILMN_1717165	ENSG00000089289	immunoglobulin binding protein 1
IGDCC4	ILMN_2139396	ENSG00000103742	immunoglobulin superfamily DCC subclass member 4
IGF1	ILMN_2056087	ENSG00000017427	insulin like growth factor 1
IGF1R	ILMN_1744023	ENSG00000140443	insulin like growth factor 1 receptor
IGF2BP3	ILMN_1807423	ENSG00000136231	insulin like growth factor 2 mRNA binding protein 3
IGFBP4	ILMN_1665865	ENSG00000141753	insulin like growth factor binding protein 4
IGFBP5	ILMN_2132982	ENSG00000115461	insulin like growth factor binding protein 5
IGIP	ILMN_1685854	ENSG00000182700	IgA inducing protein
IGLL1	ILMN_2393765	ENSG00000128322	immunoglobulin lambda like polypeptide 1
IGSF10	ILMN_1682100	ENSG00000152580	immunoglobulin superfamily member 10
IGSF3	ILMN_2396546	ENSG00000143061	immunoglobulin superfamily member 3
IGSF3	ILMN_1704353	ENSG00000143061	immunoglobulin superfamily member 3
IHO1	ILMN_1722863	ENSG00000173421	interactor of HORMAD1 1
IK	ILMN_1699362	ENSG00000113141	IK cytokine
IL10RA	ILMN_1652825	ENSG00000110324	interleukin 10 receptor subunit alpha
IL11RA	ILMN_1720024	ENSG00000137070	interleukin 11 receptor subunit alpha
IL11RA	ILMN_1664912	ENSG00000137070	interleukin 11 receptor subunit alpha
IL13RA1	ILMN_1768505	ENSG00000131724	interleukin 13 receptor subunit alpha 1
IL16	ILMN_1813572	ENSG00000172349	interleukin 16
IL17RC	ILMN_1798790	ENSG00000163702	interleukin 17 receptor C
IL17RD	ILMN_1728663	ENSG00000144730	interleukin 17 receptor D
IL18BP	ILMN_1742318	ENSG00000137496	interleukin 18 binding protein
IL18BP	ILMN_2356031	ENSG00000137496	interleukin 18 binding protein
IL2RB	ILMN_1684349	ENSG00000100385	interleukin 2 receptor subunit beta
ILK	ILMN_2364376	ENSG00000166333	integrin linked kinase
ILVBL	ILMN_1759419	ENSG00000105135	ilvB acetolactate synthase like
ILVBL	ILMN_1769451	ENSG00000105135	ilvB acetolactate synthase like
IMP3	ILMN_1733696	ENSG00000177971	IMP U3 small nucleolar ribonucleoprotein 3
IMPACT	ILMN_2043845	ENSG00000154059	impact RWD domain protein
IMPDH2	ILMN_1705737	ENSG00000178035	inosine monophosphate dehydrogenase 2
INCENP	ILMN_2355738	ENSG00000149503	inner centromere protein
ING4	ILMN_1809141	ENSG00000111653	inhibitor of growth family member 4
INKA1	ILMN_1690454	ENSG00000185614	inka box actin regulator 1
INO80B	ILMN_1779040	ENSG00000115274	INO80 complex subunit B
INO80B-WBP1	ILMN_2093231	ENSG00000274049	INO80B-WBP1 readthrough (NMD candidate)
INPP5B	ILMN_1810116	ENSG00000204084	inositol polyphosphate-5-phosphatase B
INPPL1	ILMN_1728426	ENSG00000165458	inositol polyphosphate phosphatase like 1
INSIG2	ILMN_1676629	ENSG00000125629	insulin induced gene 2
INTS1	ILMN_2317463	ENSG00000164880	integrator complex subunit 1
INTS10	ILMN_1679483	ENSG00000104613	integrator complex subunit 10
INTS11	ILMN_1718013	ENSG00000127054	integrator complex subunit 11
INTS4	ILMN_1660844	ENSG00000149262	integrator complex subunit 4
INTS8	ILMN_1759084	ENSG00000164941	integrator complex subunit 8
IP6K1	ILMN_2392286	ENSG00000176095	inositol hexakisphosphate kinase 1
IP6K1	ILMN_1700231	ENSG00000176095	inositol hexakisphosphate kinase 1
IPO9	ILMN_1723117	ENSG00000198700	importin 9
IQCC	ILMN_1774589	ENSG00000160051	IQ motif containing C
IQCK	ILMN_2081883	ENSG00000174628	IQ motif containing K
IRF2BP1	ILMN_1751171	ENSG00000170604	interferon regulatory factor 2 binding protein 1
IRF2BP2	ILMN_2394561	ENSG00000168264	interferon regulatory factor 2 binding protein 2
IRF6	ILMN_1786470	ENSG00000117595	interferon regulatory factor 6
IRS1	ILMN_1759232	ENSG00000169047	insulin receptor substrate 1
IRX3	ILMN_1811468	ENSG00000177508	iroquois homeobox 3
IRX5	ILMN_2140559	ENSG00000176842	iroquois homeobox 5
ISCA2	ILMN_2136635	ENSG00000165898	iron-sulfur cluster assembly 2
ISCU	ILMN_1735432	ENSG00000136003	iron-sulfur cluster assembly enzyme
ISCU	ILMN_2409062	ENSG00000136003	iron-sulfur cluster assembly enzyme
ISLR	ILMN_1673609	ENSG00000129009	immunoglobulin superfamily containing leucine rich repeat
ISLR	ILMN_1747593	ENSG00000129009	immunoglobulin superfamily containing leucine rich repeat
IST1	ILMN_1740351	ENSG00000182149	IST1 factor associated with ESCRT-III
ITCH	ILMN_1752283	ENSG00000078747	itchy E3 ubiquitin protein ligase
ITGA11	ILMN_2406084	ENSG00000137809	integrin subunit alpha 11
ITGA11	ILMN_1651343	ENSG00000137809	integrin subunit alpha 11
ITM2C	ILMN_1680453	ENSG00000135916	integral membrane protein 2C
ITM2C	ILMN_2366041	ENSG00000135916	integral membrane protein 2C
ITPA	ILMN_1718334	ENSG00000125877	inosine triphosphatase
IZUMO1R	ILMN_2279217	ENSG00000183560	IZUMO1 receptor, JUNO
IZUMO4	ILMN_2400546	ENSG00000099840	IZUMO family member 4
JADE1	ILMN_1736015	ENSG00000077684	jade family PHD finger 1
JADE2	ILMN_1795285	ENSG00000043143	jade family PHD finger 2
JAM3	ILMN_1769575	ENSG00000166086	junctional adhesion molecule 3
JCHAIN	ILMN_2105441	ENSG00000132465	joining chain of multimeric IgA and IgM
JMJD7-PLA2G4B	ILMN_1697629	ENSG00000168970	JMJD7-PLA2G4B readthrough
JMJD8	ILMN_1687921	ENSG00000161999	jumonji domain containing 8
JRK	ILMN_1661307	ENSG00000234616	Jrk helix-turn-helix protein
JTB	ILMN_2206716	ENSG00000143543	jumping translocation breakpoint
JUP	ILMN_1733811	ENSG00000173801	junction plakoglobin
KANSL1	ILMN_2200636	ENSG00000120071	KAT8 regulatory NSL complex subunit 1
KANSL3	ILMN_1745217	ENSG00000114982	KAT8 regulatory NSL complex subunit 3
KARS1	ILMN_1777584	ENSG00000065427	lysyl-tRNA synthetase 1
KAT2A	ILMN_1782247	ENSG00000108773	lysine acetyltransferase 2A
KAT8	ILMN_1804679	ENSG00000103510	lysine acetyltransferase 8
KAZALD1	ILMN_1684755	ENSG00000107821	Kazal type serine peptidase inhibitor domain 1
KBTBD3	ILMN_1769382	ENSG00000182359	kelch repeat and BTB domain containing 3
KBTBD6	ILMN_2049063	ENSG00000165572	kelch repeat and BTB domain containing 6
KBTBD7	ILMN_2044293	ENSG00000120696	kelch repeat and BTB domain containing 7
KCNF1	ILMN_1671392	ENSG00000162975	potassium voltage-gated channel modifier subfamily F member 1
KCNJ8	ILMN_1735779	ENSG00000121361	potassium inwardly rectifying channel subfamily J member 8
KCNMA1	ILMN_2297765	ENSG00000156113	potassium calcium-activated channel subfamily M alpha 1
KCNMB4	ILMN_1727466	ENSG00000135643	potassium calcium-activated channel subfamily M regulatory beta subunit 4
KCNRG	ILMN_1688938	ENSG00000198553	potassium channel regulator
KCTD18	ILMN_2150187	ENSG00000155729	potassium channel tetramerization domain containing 18
KCTD2	ILMN_1718900	ENSG00000180901	potassium channel tetramerization domain containing 2
KCTD21	ILMN_1809708	ENSG00000188997	potassium channel tetramerization domain containing 21
KCTD3	ILMN_2134555	ENSG00000136636	potassium channel tetramerization domain containing 3
KCTD7	ILMN_1769207	ENSG00000243335	potassium channel tetramerization domain containing 7
KDELR1	ILMN_2130411	ENSG00000105438	KDEL endoplasmic reticulum protein retention receptor 1
KDM1A	ILMN_1813840	ENSG00000004487	lysine demethylase 1A
KDM3A	ILMN_1722532	ENSG00000115548	lysine demethylase 3A
KDM3B	ILMN_1706539	ENSG00000120733	lysine demethylase 3B
KDM5B	ILMN_1755727	ENSG00000117139	lysine demethylase 5B
KHDC1-AS1	ILMN_1739257	ENSG00000229852	KHDC1 antisense RNA 1
KHDC4	ILMN_1670752	ENSG00000132680	KH domain containing 4, pre-mRNA splicing factor
KHDRBS1	ILMN_2076640	ENSG00000121774	KH RNA binding domain containing, signal transduction associated 1
KHNYN	ILMN_1654392	ENSG00000100441	KH and NYN domain containing
KIDINS220	ILMN_1679232	ENSG00000134313	kinase D interacting substrate 220
KIF20B	ILMN_1712452	ENSG00000138182	kinesin family member 20B
KIZ	ILMN_1779536	ENSG00000088970	kizuna centrosomal protein
KIAA1191	ILMN_2376133	ENSG00000122203	KIAA1191
KIAA1328	ILMN_1745389	ENSG00000150477	KIAA1328
KIAA2013	ILMN_1803483	ENSG00000116685	KIAA2013
KL	ILMN_2352077	ENSG00000133116	klotho
KLF12	ILMN_1762801	ENSG00000118922	KLF transcription factor 12
KLF12	ILMN_1714444	ENSG00000118922	KLF transcription factor 12
KLHDC2	ILMN_1741204	ENSG00000165516	kelch domain containing 2
KLHDC3	ILMN_1730940	ENSG00000124702	kelch domain containing 3
KLHDC9	ILMN_1701918	ENSG00000162755	kelch domain containing 9
KLHL12	ILMN_2164081	ENSG00000117153	kelch like family member 12
KLHL13	ILMN_2140510	ENSG00000003096	kelch like family member 13
KLHL22	ILMN_1705390	ENSG00000099910	kelch like family member 22
KLHL28	ILMN_1693401	ENSG00000179454	kelch like family member 28
KLHL3	ILMN_1770641	ENSG00000146021	kelch like family member 3
KLHL4	ILMN_1701700	ENSG00000102271	kelch like family member 4
KLHL41	ILMN_2218604	ENSG00000239474	kelch like family member 41
KLHL42	ILMN_1727134	ENSG00000087448	kelch like family member 42
KLHL7	ILMN_1674458	ENSG00000122550	kelch like family member 7
KLHL8	ILMN_2189222	ENSG00000145332	kelch like family member 8
KLHL9	ILMN_1664466	ENSG00000198642	kelch like family member 9
KLK4	ILMN_1792363	ENSG00000167749	kallikrein related peptidase 4
KLRA1P	ILMN_1795431	ENSG00000256667	killer cell lectin like receptor A1, pseudogene
KLRB1	ILMN_2079655	ENSG00000111796	killer cell lectin like receptor B1
KLRD1	ILMN_1797988	ENSG00000134539	killer cell lectin like receptor D1
KLRF1	ILMN_2055781	ENSG00000150045	killer cell lectin like receptor F1
KMT2A	ILMN_1679003	ENSG00000118058	lysine methyltransferase 2A
KMT2A	ILMN_1668683	ENSG00000118058	lysine methyltransferase 2A
KNOP1	ILMN_1783712	ENSG00000103550	lysine rich nucleolar protein 1
KNTC1	ILMN_1732516	ENSG00000184445	kinetochore associated 1
KPNA5	ILMN_1669700	ENSG00000196911	karyopherin subunit alpha 5
KRBOX4	ILMN_1710768	ENSG00000147121	KRAB box domain containing 4
KRCC1	ILMN_2091375	ENSG00000172086	lysine rich coiled-coil 1
KRIT1	ILMN_2323413	ENSG00000001631	KRIT1 ankyrin repeat containing
KRT222	ILMN_1801090	ENSG00000213424	keratin 222
KRTCAP2	ILMN_1658802	ENSG00000163463	keratinocyte associated protein 2
KYAT3	ILMN_1778371	ENSG00000137944	kynurenine aminotransferase 3
L3MBTL1	ILMN_1658277	ENSG00000185513	L3MBTL histone methyl-lysine binding protein 1
L3MBTL1	ILMN_1774258	ENSG00000185513	L3MBTL histone methyl-lysine binding protein 1
L3MBTL2	ILMN_2336109	ENSG00000100395	L3MBTL histone methyl-lysine binding protein 2
L3MBTL3	ILMN_1727495	ENSG00000198945	L3MBTL histone methyl-lysine binding protein 3
LAGE3	ILMN_1708151	ENSG00000196976	L antigen family member 3
LAMP3	ILMN_2170814	ENSG00000078081	lysosomal associated membrane protein 3
LAMTOR1	ILMN_1815878	ENSG00000149357	late endosomal/lysosomal adaptor, MAPK and MTOR activator 1
LAMTOR3	ILMN_1659415	ENSG00000109270	late endosomal/lysosomal adaptor, MAPK and MTOR activator 3
LARGE1	ILMN_2408430	ENSG00000133424	LARGE xylosyl- and glucuronyltransferase 1
LARGE1	ILMN_1662038	ENSG00000133424	LARGE xylosyl- and glucuronyltransferase 1
LAS1L	ILMN_1774890	ENSG00000001497	LAS1 like ribosome biogenesis factor
LAT	ILMN_2404625	ENSG00000213658	linker for activation of T cells
LAT	ILMN_1691539	ENSG00000213658	linker for activation of T cells
LBX2	ILMN_1808731	ENSG00000179528	ladybird homeobox 2
LCMT1	ILMN_2336186	ENSG00000205629	leucine carboxyl methyltransferase 1
LCMT1	ILMN_2312709	ENSG00000205629	leucine carboxyl methyltransferase 1
LDHD	ILMN_2407346	ENSG00000166816	lactate dehydrogenase D
LEAP2	ILMN_2124361	ENSG00000164406	liver enriched antimicrobial peptide 2
LEMD2	ILMN_1680860	ENSG00000161904	LEM domain nuclear envelope protein 2
LETMD1	ILMN_1754149	ENSG00000050426	LETM1 domain containing 1
LGALS3	ILMN_1803788	ENSG00000131981	galectin 3
LHFPL6	ILMN_1767448	ENSG00000183722	LHFPL tetraspan subfamily member 6
LIAS	ILMN_2393341	ENSG00000121897	lipoic acid synthetase
LIAS	ILMN_1736077	ENSG00000121897	lipoic acid synthetase
LIG1	ILMN_1706779	ENSG00000105486	DNA ligase 1
LIME1	ILMN_2183687	ENSG00000203896	Lck interacting transmembrane adaptor 1
LIN37	ILMN_1656886	ENSG00000267796	lin-37 DREAM MuvB core complex component
LIN54	ILMN_1724062	ENSG00000189308	lin-54 DREAM MuvB core complex component
LIN9	ILMN_2137084	ENSG00000183814	lin-9 DREAM MuvB core complex component
LINC00173	ILMN_1732143	ENSG00000196668	long intergenic non-protein coding RNA 173
LINC01011	ILMN_2138622	ENSG00000244041	long intergenic non-protein coding RNA 1011
LINC01089	ILMN_2098947	ENSG00000212694	long intergenic non-protein coding RNA 1089
LINC01618	ILMN_2148469	ENSG00000250302	long intergenic non-protein coding RNA 1618
LINC02802	ILMN_2355225	ENSG00000232527	long intergenic non-protein coding RNA 2802
LINC02875	ILMN_1783682	ENSG00000187013	long intergenic non-protein coding RNA 2875
LINC02897	ILMN_1666825	ENSG00000221953	long intergenic non-protein coding RNA 2897
LINC02913	ILMN_1777477	ENSG00000179082	long intergenic non-protein coding RNA 2913
LIPC	ILMN_2218002	ENSG00000166035	lipase C, hepatic type
LIPT1	ILMN_2343105	ENSG00000144182	lipoyltransferase 1
LLGL1	ILMN_1798212	ENSG00000131899	LLGL scribble cell polarity complex component 1
LMAN2L	ILMN_1755221	ENSG00000114988	lectin, mannose binding 2 like
LMF2	ILMN_1716056	ENSG00000100258	lipase maturation factor 2
LMO3	ILMN_1764231	ENSG00000048540	LIM domain only 3
LMO3	ILMN_1813295	ENSG00000048540	LIM domain only 3
LMTK2	ILMN_1673590	ENSG00000164715	lemur tyrosine kinase 2
LMX1A	ILMN_1671898	ENSG00000162761	LIM homeobox transcription factor 1 alpha
LNPK	ILMN_2055760	ENSG00000144320	lunapark, ER junction formation factor
LOXL1	ILMN_1734950	ENSG00000129038	lysyl oxidase like 1
LPAR1	ILMN_1701441	ENSG00000198121	lysophosphatidic acid receptor 1
LPAR4	ILMN_1670692	ENSG00000147145	lysophosphatidic acid receptor 4
LPAR5	ILMN_2044453	ENSG00000184574	lysophosphatidic acid receptor 5
LPP	ILMN_1651254	ENSG00000145012	LIM domain containing preferred translocation partner in lipoma
LRATD2	ILMN_1670807	ENSG00000168672	LRAT domain containing 2
LRIG1	ILMN_2128795	ENSG00000144749	leucine rich repeats and immunoglobulin like domains 1
LRIG2	ILMN_1654099	ENSG00000198799	leucine rich repeats and immunoglobulin like domains 2
LRIG3	ILMN_2075757	ENSG00000139263	leucine rich repeats and immunoglobulin like domains 3
LRP3	ILMN_2127605	ENSG00000130881	LDL receptor related protein 3
LRPAP1	ILMN_1660341	ENSG00000163956	LDL receptor related protein associated protein 1
LRPPRC	ILMN_1662417	ENSG00000138095	leucine rich pentatricopeptide repeat containing
LRRC14	ILMN_1678998	ENSG00000160959	leucine rich repeat containing 14
LRRC17	ILMN_2406815	ENSG00000128606	leucine rich repeat containing 17
LRRC17	ILMN_1652826	ENSG00000128606	leucine rich repeat containing 17
LRRC20	ILMN_1690523	ENSG00000172731	leucine rich repeat containing 20
LRRC37B	ILMN_1777895	ENSG00000185158	leucine rich repeat containing 37B
LRRC47	ILMN_1668484	ENSG00000130764	leucine rich repeat containing 47
LRRC75B	ILMN_1737255	ENSG00000178026	leucine rich repeat containing 75B
LRRC8D	ILMN_1763409	ENSG00000171492	leucine rich repeat containing 8 VRAC subunit D
LRRCC1	ILMN_2384807	ENSG00000133739	leucine rich repeat and coiled-coil centrosomal protein 1
LRRN4CL	ILMN_1697054	ENSG00000177363	LRRN4 C-terminal like
LRRTM2	ILMN_1748245	ENSG00000146006	leucine rich repeat transmembrane neuronal 2
LRTM1	ILMN_1800302	ENSG00000144771	leucine rich repeats and transmembrane domains 1
LSAMP	ILMN_1739154	ENSG00000185565	limbic system associated membrane protein
LSM14A	ILMN_2079803	ENSG00000257103	LSM14A mRNA processing body assembly factor
LSM2	ILMN_2070300	ENSG00000204392	LSM2 homolog, U6 small nuclear RNA and mRNA degradation associated
LSM7	ILMN_1678165	ENSG00000130332	LSM7 homolog, U6 small nuclear RNA and mRNA degradation associated
LSP1	ILMN_1798779	ENSG00000130592	lymphocyte specific protein 1
LSP1	ILMN_2355225	ENSG00000130592	lymphocyte specific protein 1
LSP1P4	ILMN_2355225	ENSG00000143429	LSP1 pseudogene 4
LSP1P5	ILMN_2355225	ENSG00000288905	LSP1 pseudogene 5
LSP1P5	ILMN_2355225	ENSG00000291150	LSP1 pseudogene 5
LSS	ILMN_1715024	ENSG00000160285	lanosterol synthase
LTA4H	ILMN_1690342	ENSG00000111144	leukotriene A4 hydrolase
LTO1	ILMN_1762549	ENSG00000149716	LTO1 maturation factor of ABCE1
LUC7L3	ILMN_2299072	ENSG00000108848	LUC7 like 3 pre-mRNA splicing factor
LUC7L3	ILMN_1728180	ENSG00000108848	LUC7 like 3 pre-mRNA splicing factor
LURAP1	ILMN_1742738	ENSG00000171357	leucine rich adaptor protein 1
LURAP1L	ILMN_1701361	ENSG00000153714	leucine rich adaptor protein 1 like
LYPLAL1	ILMN_2142117	ENSG00000143353	lysophospholipase like 1
LYRM4	ILMN_1740927	ENSG00000214113	LYR motif containing 4
LYSMD4	ILMN_2159859	ENSG00000183060	LysM domain containing 4
LZTS2	ILMN_1763524	ENSG00000107816	leucine zipper tumor suppressor 2
MACROD1	ILMN_1740960	ENSG00000133315	mono-ADP ribosylhydrolase 1
MADD	ILMN_1743583	ENSG00000110514	MAP kinase activating death domain
MADD	ILMN_2328224	ENSG00000110514	MAP kinase activating death domain
MAF	ILMN_1722206	ENSG00000178573	MAF bZIP transcription factor
MAF	ILMN_1719543	ENSG00000178573	MAF bZIP transcription factor
MAGED2	ILMN_1683576	ENSG00000102316	MAGE family member D2
MAGEE1	ILMN_2205032	ENSG00000198934	MAGE family member E1
MAGEF1	ILMN_1730202	ENSG00000177383	MAGE family member F1
MAN1B1	ILMN_1771957	ENSG00000177239	mannosidase alpha class 1B member 1
MAN1C1	ILMN_1713807	ENSG00000117643	mannosidase alpha class 1C member 1
MAN2B1	ILMN_1759341	ENSG00000104774	mannosidase alpha class 2B member 1
MANBAL	ILMN_2395926	ENSG00000101363	mannosidase beta like
MANBAL	ILMN_1673944	ENSG00000101363	mannosidase beta like
MAP1A	ILMN_1701558	ENSG00000166963	microtubule associated protein 1A
MAP2K4	ILMN_2100689	ENSG00000065559	mitogen-activated protein kinase kinase 4
MAP2K5	ILMN_2391891	ENSG00000137764	mitogen-activated protein kinase kinase 5
MAP2K5	ILMN_1718129	ENSG00000137764	mitogen-activated protein kinase kinase 5
MAP3K4	ILMN_1678087	ENSG00000085511	mitogen-activated protein kinase kinase kinase 4
MAP4K1	ILMN_1665943	ENSG00000104814	mitogen-activated protein kinase kinase kinase kinase 1
MAP6D1	ILMN_1688464	ENSG00000180834	MAP6 domain containing 1
MAPKAPK5-AS1	ILMN_1798957	ENSG00000234608	MAPKAPK5 antisense RNA 1
MARCKS	ILMN_1807042	ENSG00000277443	myristoylated alanine rich protein kinase C substrate
MARF1	ILMN_1793371	ENSG00000166783	meiosis regulator and mRNA stability factor 1
MAT1A	ILMN_1767657	ENSG00000151224	methionine adenosyltransferase 1A
MAT2B	ILMN_1673960	ENSG00000038274	methionine adenosyltransferase 2 non-catalytic beta subunit
MAT2B	ILMN_1811367	ENSG00000038274	methionine adenosyltransferase 2 non-catalytic beta subunit
MATR3	ILMN_1815107	ENSG00000015479	matrin 3
MATR3	ILMN_1815107	ENSG00000280987	matrin 3
MATR3P1	ILMN_1815107	ENSG00000225858	MATR3 pseudogene 1
MAU2	ILMN_1685631	ENSG00000129933	MAU2 sister chromatid cohesion factor
MBIP	ILMN_2106818	ENSG00000151332	MAP3K12 binding inhibitory protein 1
MBLAC2	ILMN_2193752	ENSG00000176055	metallo-beta-lactamase domain containing 2
MBP	ILMN_1672660	ENSG00000197971	myelin basic protein
MC1R	ILMN_1814971	ENSG00000258839	melanocortin 1 receptor
MCEE	ILMN_1735347	ENSG00000124370	methylmalonyl-CoA epimerase
MCM2	ILMN_1681503	ENSG00000073111	minichromosome maintenance complex component 2
MCM3	ILMN_2224143	ENSG00000112118	minichromosome maintenance complex component 3
MCM3AP	ILMN_1784766	ENSG00000160294	minichromosome maintenance complex component 3 associated protein
MCM4	ILMN_2412860	ENSG00000104738	minichromosome maintenance complex component 4
MCM6	ILMN_1798654	ENSG00000076003	minichromosome maintenance complex component 6
MCM7	ILMN_1663195	ENSG00000166508	minichromosome maintenance complex component 7
MCM8	ILMN_2407124	ENSG00000125885	minichromosome maintenance 8 homologous recombination repair factor
MCOLN3	ILMN_2046611	ENSG00000055732	mucolipin TRP cation channel 3
MCRIP1	ILMN_1733799	ENSG00000225663	MAPK regulated corepressor interacting protein 1
MCRS1	ILMN_1784227	ENSG00000187778	microspherule protein 1
MDC1	ILMN_1814122	ENSG00000137337	mediator of DNA damage checkpoint 1
MDH2	ILMN_2079004	ENSG00000146701	malate dehydrogenase 2
MDK	ILMN_2349393	ENSG00000110492	midkine
MDK	ILMN_2261876	ENSG00000110492	midkine
MDM1	ILMN_1736460	ENSG00000111554	Mdm1 nuclear protein
MDP1	ILMN_1662263	ENSG00000213920	magnesium dependent phosphatase 1
MEA1	ILMN_1727073	ENSG00000124733	male-enhanced antigen 1
MED16	ILMN_1790782	ENSG00000175221	mediator complex subunit 16
MED16	ILMN_1800451	ENSG00000175221	mediator complex subunit 16
MED18	ILMN_1788528	ENSG00000130772	mediator complex subunit 18
MED22	ILMN_1697218	ENSG00000148297	mediator complex subunit 22
MED23	ILMN_1690999	ENSG00000112282	mediator complex subunit 23
MED29	ILMN_1728360	ENSG00000063322	mediator complex subunit 29
MED30	ILMN_1671603	ENSG00000164758	mediator complex subunit 30
MED9	ILMN_1794108	ENSG00000141026	mediator complex subunit 9
MEF2C	ILMN_1742544	ENSG00000081189	myocyte enhancer factor 2C
MEF2D	ILMN_1763228	ENSG00000116604	myocyte enhancer factor 2D
MEG3	ILMN_2061435	ENSG00000214548	maternally expressed 3
MEIS2	ILMN_1695945	ENSG00000134138	Meis homeobox 2
MEN1	ILMN_2340877	ENSG00000133895	menin 1
MEOX2	ILMN_1777263	ENSG00000106511	mesenchyme homeobox 2
MESP1	ILMN_1806603	ENSG00000166823	mesoderm posterior bHLH transcription factor 1
METAP1	ILMN_1785795	ENSG00000164024	methionyl aminopeptidase 1
METTL13	ILMN_2343624	ENSG00000010165	methyltransferase 13, eEF1A lysine and N-terminal methyltransferase
METTL17	ILMN_2276811	ENSG00000165792	methyltransferase like 17
METTL18	ILMN_2121189	ENSG00000171806	methyltransferase 18, RPL3 N3-histidine
METTL25	ILMN_1745497	ENSG00000127720	methyltransferase like 25
METTL3	ILMN_1655635	ENSG00000165819	methyltransferase 3, N6-adenosine-methyltransferase complex catalytic subunit
METTL4	ILMN_1738173	ENSG00000101574	methyltransferase 4, N6-adenosine
MEX3B	ILMN_1658989	ENSG00000183496	mex-3 RNA binding family member B
MFAP4	ILMN_1766914	ENSG00000166482	microfibril associated protein 4
MFSD5	ILMN_1702065	ENSG00000182544	major facilitator superfamily domain containing 5
MGA	ILMN_2372379	ENSG00000174197	MAX dimerization protein MGA
MGAT4B	ILMN_1796106	ENSG00000161013	alpha-1,3-mannosyl-glycoprotein 4-beta-N-acetylglucosaminyltransferase B
MGME1	ILMN_2176251	ENSG00000125871	mitochondrial genome maintenance exonuclease 1
MIA2	ILMN_1690880	ENSG00000150527	MIA SH3 domain ER export factor 2
MIB1	ILMN_1788832	ENSG00000101752	MIB E3 ubiquitin protein ligase 1
MIEF1	ILMN_1793203	ENSG00000100335	mitochondrial elongation factor 1
MIF4GD	ILMN_1743806	ENSG00000125457	MIF4G domain containing
MIIP	ILMN_1783843	ENSG00000116691	migration and invasion inhibitory protein
MINAR1	ILMN_1692394	ENSG00000169330	membrane integral NOTCH2 associated receptor 1
MINDY3	ILMN_1725594	ENSG00000148481	MINDY lysine 48 deubiquitinase 3
MIOS	ILMN_1680644	ENSG00000164654	meiosis regulator for oocyte development
MIPEP	ILMN_1669070	ENSG00000027001	mitochondrial intermediate peptidase
MIPOL1	ILMN_1710684	ENSG00000151338	mirror-image polydactyly 1
MIR106B	ILMN_1663195	ENSG00000208036	microRNA 106b
MIR1225	ILMN_2339028	ENSG00000221656	microRNA 1225
MIR1227	ILMN_1697701	ENSG00000221411	microRNA 1227
MIR1229	ILMN_1796106	ENSG00000221394	microRNA 1229
MIR186	ILMN_1662383	ENSG00000207721	microRNA 186
MIR1914	ILMN_2050255	ENSG00000284433	microRNA 1914
MIR198	ILMN_2201678	ENSG00000284121	microRNA 198
MIR25	ILMN_1663195	ENSG00000207547	microRNA 25
MIR33B	ILMN_2328986	ENSG00000207839	microRNA 33b
MIR33B	ILMN_1663035	ENSG00000207839	microRNA 33b
MIR3942	ILMN_2140207	ENSG00000265102	microRNA 3942
MIR4647	ILMN_1789001	ENSG00000284427	microRNA 4647
MIR4653	ILMN_1712806	ENSG00000264425	microRNA 4653
MIR4680	ILMN_2396272	ENSG00000284482	microRNA 4680
MIR4721	ILMN_1738369	ENSG00000283845	microRNA 4721
MIR4723	ILMN_1748481	ENSG00000284532	microRNA 4723
MIR4750	ILMN_1756542	ENSG00000284394	microRNA 4750
MIR4771-1	ILMN_1804812	ENSG00000264793	microRNA 4771-1
MIR4771-2	ILMN_1804812	ENSG00000266063	microRNA 4771-2
MIR5193	ILMN_1794612	ENSG00000283726	microRNA 5193
MIR6514	ILMN_2263144	ENSG00000274066	microRNA 6514
MIR6736	ILMN_1814966	ENSG00000278549	microRNA 6736
MIR6745	ILMN_1682957	ENSG00000275208	microRNA 6745
MIR6748	ILMN_1733757	ENSG00000284535	microRNA 6748
MIR6752	ILMN_2103841	ENSG00000276769	microRNA 6752
MIR6759	ILMN_1689001	ENSG00000283621	microRNA 6759
MIR6777	ILMN_2328986	ENSG00000274111	microRNA 6777
MIR6777	ILMN_1663035	ENSG00000274111	microRNA 6777
MIR6782	ILMN_1806946	ENSG00000275107	microRNA 6782
MIR6785	ILMN_2059211	ENSG00000284595	microRNA 6785
MIR6812	ILMN_1738759	ENSG00000273555	microRNA 6812
MIR6833	ILMN_2044927	ENSG00000277264	microRNA 6833
MIR6834	ILMN_1661490	ENSG00000284064	microRNA 6834
MIR6838	ILMN_1716973	ENSG00000283969	microRNA 6838
MIR6850	ILMN_1764721	ENSG00000283764	microRNA 6850
MIR6858	ILMN_1725130	ENSG00000276350	microRNA 6858
MIR7111	ILMN_2154566	ENSG00000276712	microRNA 7111
MIR93	ILMN_1663195	ENSG00000207757	microRNA 93
MIR939	ILMN_1654545	ENSG00000284310	microRNA 939
MIR99AHG	ILMN_2283814	ENSG00000215386	mir-99a-let-7c cluster host gene
MIS18BP1	ILMN_1666208	ENSG00000129534	MIS18 binding protein 1
MITD1	ILMN_1677133	ENSG00000158411	microtubule interacting and trafficking domain containing 1
MITF	ILMN_2304186	ENSG00000187098	melanocyte inducing transcription factor
MIX23	ILMN_1686920	ENSG00000160124	mitochondrial matrix import factor 23
MKKS	ILMN_1718718	ENSG00000125863	MKKS centrosomal shuttling protein
MKLN1	ILMN_1742578	ENSG00000128585	muskelin 1
MKRN1	ILMN_1671583	ENSG00000133606	makorin ring finger protein 1
MKX	ILMN_1681780	ENSG00000150051	mohawk homeobox
MLH1	ILMN_1788363	ENSG00000076242	mutL homolog 1
MLLT10	ILMN_2399310	ENSG00000078403	MLLT10 histone lysine methyltransferase DOT1L cofactor
MLST8	ILMN_1789240	ENSG00000167965	MTOR associated protein, LST8 homolog
MMAB	ILMN_1689156	ENSG00000139428	metabolism of cobalamin associated B
MMP11	ILMN_1655915	ENSG00000099953	matrix metallopeptidase 11
MMP14	ILMN_1774739	ENSG00000157227	matrix metallopeptidase 14
MMP2	ILMN_1762106	ENSG00000087245	matrix metallopeptidase 2
MMP23A	ILMN_2317701	ENSG00000215914	matrix metallopeptidase 23A (pseudogene)
MMP23B	ILMN_2317701	ENSG00000189409	matrix metallopeptidase 23B
MMP27	ILMN_1679694	ENSG00000137675	matrix metallopeptidase 27
MMS19	ILMN_2174394	ENSG00000155229	MMS19 homolog, cytosolic iron-sulfur assembly component
MNS1	ILMN_2157240	ENSG00000138587	meiosis specific nuclear structural 1
MOB3B	ILMN_1717046	ENSG00000120162	MOB kinase activator 3B
MOCOS	ILMN_1673522	ENSG00000075643	molybdenum cofactor sulfurase
MOCS1	ILMN_2323801	ENSG00000124615	molybdenum cofactor synthesis 1
MOGAT1	ILMN_1765971	ENSG00000124003	monoacylglycerol O-acyltransferase 1
MOSPD3	ILMN_2356909	ENSG00000106330	motile sperm domain containing 3
MOSPD3	ILMN_1805345	ENSG00000106330	motile sperm domain containing 3
MOV10	ILMN_1725700	ENSG00000155363	Mov10 RISC complex RNA helicase
MPC1	ILMN_2226324	ENSG00000060762	mitochondrial pyruvate carrier 1
MPHOSPH8	ILMN_2054213	ENSG00000196199	M-phase phosphoprotein 8
MPPE1	ILMN_1776515	ENSG00000154889	metallophosphoesterase 1
MPST	ILMN_1764596	ENSG00000128309	mercaptopyruvate sulfurtransferase
MPV17	ILMN_2356574	ENSG00000115204	mitochondrial inner membrane protein MPV17
MPV17	ILMN_1746457	ENSG00000115204	mitochondrial inner membrane protein MPV17
MPZL1	ILMN_2386008	ENSG00000197965	myelin protein zero like 1
MRC2	ILMN_1783946	ENSG00000011028	mannose receptor C type 2
MRFAP1L1	ILMN_1689774	ENSG00000178988	Morf4 family associated protein 1 like 1
MRFAP1L2	ILMN_1797181	ENSG00000170846	Morf4 family associated protein 1 like 2
MRGBP	ILMN_1790136	ENSG00000101189	MRG domain binding protein
MRI1	ILMN_2410965	ENSG00000037757	methylthioribose-1-phosphate isomerase 1
MRI1	ILMN_1732089	ENSG00000037757	methylthioribose-1-phosphate isomerase 1
MRM2	ILMN_1815933	ENSG00000122687	mitochondrial rRNA methyltransferase 2
MRNIP	ILMN_2409879	ENSG00000161010	MRN complex interacting protein
MRPL1	ILMN_2076658	ENSG00000169288	mitochondrial ribosomal protein L1
MRPL11	ILMN_2316540	ENSG00000174547	mitochondrial ribosomal protein L11
MRPL11	ILMN_1690371	ENSG00000174547	mitochondrial ribosomal protein L11
MRPL16	ILMN_1730685	ENSG00000166902	mitochondrial ribosomal protein L16
MRPL2	ILMN_1763264	ENSG00000112651	mitochondrial ribosomal protein L2
MRPL21	ILMN_1744835	ENSG00000197345	mitochondrial ribosomal protein L21
MRPL21	ILMN_2348050	ENSG00000197345	mitochondrial ribosomal protein L21
MRPL22	ILMN_1748819	ENSG00000082515	mitochondrial ribosomal protein L22
MRPL23	ILMN_1806123	ENSG00000214026	mitochondrial ribosomal protein L23
MRPL30	ILMN_1766154	ENSG00000185414	mitochondrial ribosomal protein L30
MRPL35	ILMN_1812777	ENSG00000132313	mitochondrial ribosomal protein L35
MRPL37	ILMN_2041327	ENSG00000116221	mitochondrial ribosomal protein L37
MRPL38	ILMN_1719656	ENSG00000204316	mitochondrial ribosomal protein L38
MRPL40	ILMN_1687403	ENSG00000185608	mitochondrial ribosomal protein L40
MRPL43	ILMN_2258774	ENSG00000055950	mitochondrial ribosomal protein L43
MRPL43	ILMN_1652147	ENSG00000055950	mitochondrial ribosomal protein L43
MRPL45	ILMN_1748650	ENSG00000278845	mitochondrial ribosomal protein L45
MRPL48	ILMN_1773369	ENSG00000175581	mitochondrial ribosomal protein L48
MRPL49	ILMN_1681324	ENSG00000149792	mitochondrial ribosomal protein L49
MRPL51	ILMN_2097421	ENSG00000111639	mitochondrial ribosomal protein L51
MRPL55	ILMN_1813817	ENSG00000162910	mitochondrial ribosomal protein L55
MRPL55	ILMN_1799289	ENSG00000162910	mitochondrial ribosomal protein L55
MRPL55	ILMN_2348090	ENSG00000162910	mitochondrial ribosomal protein L55
MRPL9	ILMN_1773716	ENSG00000143436	mitochondrial ribosomal protein L9
MRPS10	ILMN_1663664	ENSG00000048544	mitochondrial ribosomal protein S10
MRPS18A	ILMN_1730391	ENSG00000096080	mitochondrial ribosomal protein S18A
MRPS18B	ILMN_2121282	ENSG00000204568	mitochondrial ribosomal protein S18B
MRPS21	ILMN_1655765	ENSG00000266472	mitochondrial ribosomal protein S21
MRPS22	ILMN_1655377	ENSG00000175110	mitochondrial ribosomal protein S22
MRPS24	ILMN_1802553	ENSG00000062582	mitochondrial ribosomal protein S24
MRPS27	ILMN_2138435	ENSG00000113048	mitochondrial ribosomal protein S27
MRPS31	ILMN_1654552	ENSG00000102738	mitochondrial ribosomal protein S31
MRPS31P5	ILMN_2090567	ENSG00000291010	mitochondrial ribosomal protein S31 pseudogene 5
MRPS33	ILMN_1772722	ENSG00000090263	mitochondrial ribosomal protein S33
MRPS34	ILMN_1669456	ENSG00000074071	mitochondrial ribosomal protein S34
MRPS5	ILMN_1760441	ENSG00000144029	mitochondrial ribosomal protein S5
MRPS9	ILMN_1813207	ENSG00000135972	mitochondrial ribosomal protein S9
MRRF	ILMN_1680675	ENSG00000148187	mitochondrial ribosome recycling factor
MRS2	ILMN_1778677	ENSG00000124532	magnesium transporter MRS2
MS4A2	ILMN_1806721	ENSG00000149534	membrane spanning 4-domains A2
MSANTD4	ILMN_1801124	ENSG00000170903	Myb/SANT DNA binding domain containing 4 with coiled-coils
MSH5	ILMN_2134765	ENSG00000204410	mutS homolog 5
MSH5-SAPCD1	ILMN_2134765	ENSG00000255152	MSH5-SAPCD1 readthrough (NMD candidate)
MSMP	ILMN_2115135	ENSG00000215183	microseminoprotein, prostate associated
MTA1	ILMN_1671911	ENSG00000182979	metastasis associated 1
MTA3	ILMN_1768751	ENSG00000057935	metastasis associated 1 family member 3
MTBP	ILMN_1660222	ENSG00000172167	MDM2 binding protein
MTCH1	ILMN_1703006	ENSG00000137409	mitochondrial carrier 1
MTIF2	ILMN_1765520	ENSG00000085760	mitochondrial translational initiation factor 2
MTMR11	ILMN_1769299	ENSG00000014914	myotubularin related protein 11
MTMR14	ILMN_2297864	ENSG00000163719	myotubularin related protein 14
MTMR14	ILMN_2410262	ENSG00000163719	myotubularin related protein 14
MTMR14	ILMN_1659240	ENSG00000163719	myotubularin related protein 14
MTMR4	ILMN_1771019	ENSG00000108389	myotubularin related protein 4
MTREX	ILMN_1651513	ENSG00000039123	Mtr4 exosome RNA helicase
MTRFR	ILMN_1667510	ENSG00000130921	mitochondrial translation release factor in rescue
MTSS1	ILMN_2073289	ENSG00000170873	MTSS I-BAR domain containing 1
MTX3	ILMN_1679071	ENSG00000177034	metaxin 3
MUTYH	ILMN_1714438	ENSG00000132781	mutY DNA glycosylase
MVB12A	ILMN_2121207	ENSG00000141971	multivesicular body subunit 12A
MXD3	ILMN_1711904	ENSG00000213347	MAX dimerization protein 3
MXD4	ILMN_1756541	ENSG00000123933	MAX dimerization protein 4
MXI1	ILMN_1670570	ENSG00000119950	MAX interactor 1, dimerization protein
MYB	ILMN_1711894	ENSG00000118513	MYB proto-oncogene, transcription factor
MYCBP2	ILMN_1811972	ENSG00000005810	MYC binding protein 2
MYCN	ILMN_2219767	ENSG00000134323	MYCN proto-oncogene, bHLH transcription factor
MYG1	ILMN_1777765	ENSG00000139637	MYG1 exonuclease
MYH10	ILMN_1815154	ENSG00000133026	myosin heavy chain 10
MYL1	ILMN_1655894	ENSG00000168530	myosin light chain 1
MYL12B	ILMN_1654016	ENSG00000118680	myosin light chain 12B
MYL6B	ILMN_1713450	ENSG00000196465	myosin light chain 6B
MYLIP	ILMN_1656111	ENSG00000007944	myosin regulatory light chain interacting protein
MYO1D	ILMN_1805999	ENSG00000176658	myosin ID
MYO5B	ILMN_2341548	ENSG00000167306	myosin VB
MYO7A	ILMN_1811719	ENSG00000137474	myosin VIIA
MYO9A	ILMN_2173919	ENSG00000066933	myosin IXA
N4BP2L2	ILMN_1797893	ENSG00000244754	NEDD4 binding protein 2 like 2
N6AMT1	ILMN_2315569	ENSG00000156239	N-6 adenine-specific DNA methyltransferase 1
NABP2	ILMN_1704672	ENSG00000139579	nucleic acid binding protein 2
NACA	ILMN_2167616	ENSG00000196531	nascent polypeptide associated complex subunit alpha
NAE1	ILMN_1689665	ENSG00000159593	NEDD8 activating enzyme E1 subunit 1
NAGK	ILMN_1716547	ENSG00000124357	N-acetylglucosamine kinase
NAGLU	ILMN_1694980	ENSG00000108784	N-acetyl-alpha-glucosaminidase
NAP1L1	ILMN_2408815	ENSG00000187109	nucleosome assembly protein 1 like 1
NAP1L3	ILMN_1785406	ENSG00000186310	nucleosome assembly protein 1 like 3
NAP1L4	ILMN_1804327	ENSG00000205531	nucleosome assembly protein 1 like 4
NAPB	ILMN_2181125	ENSG00000125814	NSF attachment protein beta
NAPRT	ILMN_1710752	ENSG00000147813	nicotinate phosphoribosyltransferase
NARS1	ILMN_1732216	ENSG00000134440	asparaginyl-tRNA synthetase 1
NASP	ILMN_2348975	ENSG00000132780	nuclear autoantigenic sperm protein
NAV1	ILMN_1703374	ENSG00000134369	neuron navigator 1
NBAS	ILMN_1686392	ENSG00000151779	NBAS subunit of NRZ tethering complex
NBN	ILMN_2358041	ENSG00000104320	nibrin
NBPF1	ILMN_2410421	ENSG00000219481	NBPF member 1
NBPF1	ILMN_2295987	ENSG00000219481	NBPF member 1
NBPF11	ILMN_2177090	ENSG00000263956	NBPF member 11
NBPF26	ILMN_2204664	ENSG00000273136	NBPF member 26
NBPF2P	ILMN_2265995	ENSG00000227001	NBPF member 2, pseudogene
NBPF3	ILMN_2265995	ENSG00000142794	NBPF member 3
NBPF8	ILMN_2204664	ENSG00000270231	NBPF member 8
NCAL1	ILMN_2278433	ENSG00000284879	NK cell activity associated lncRNA 1
NCALD	ILMN_1788538	ENSG00000104490	neurocalcin delta
NCALD	ILMN_2343097	ENSG00000104490	neurocalcin delta
NCAPD2	ILMN_1775008	ENSG00000010292	non-SMC condensin I complex subunit D2
NCAPH2	ILMN_1715908	ENSG00000025770	non-SMC condensin II complex subunit H2
NCK1	ILMN_1698001	ENSG00000158092	NCK adaptor protein 1
NCOA1	ILMN_1669033	ENSG00000084676	nuclear receptor coactivator 1
NCOR2	ILMN_2340052	ENSG00000196498	nuclear receptor corepressor 2
NCR3	ILMN_2044471	ENSG00000204475	natural cytotoxicity triggering receptor 3
NDN	ILMN_1692058	ENSG00000182636	necdin, MAGE family member
NDUFA11	ILMN_2175712	ENSG00000174886	NADH:ubiquinone oxidoreductase subunit A11
NDUFA12	ILMN_1737738	ENSG00000184752	NADH:ubiquinone oxidoreductase subunit A12
NDUFA13	ILMN_1767139	ENSG00000186010	NADH:ubiquinone oxidoreductase subunit A13
NDUFA4	ILMN_1751258	ENSG00000189043	NDUFA4 mitochondrial complex associated
NDUFA5	ILMN_1759973	ENSG00000128609	NADH:ubiquinone oxidoreductase subunit A5
NDUFA5P12	ILMN_1759973	ENSG00000248531	NADH:ubiquinone oxidoreductase subunit A5 pseudogene 12
NDUFA9	ILMN_1760741	ENSG00000139180	NADH:ubiquinone oxidoreductase subunit A9
NDUFA9P1	ILMN_1760741	ENSG00000237406	NADH:ubiquinone oxidoreductase subunit A9 pseudogene 1
NDUFAF2	ILMN_1682857	ENSG00000164182	NADH:ubiquinone oxidoreductase complex assembly factor 2
NDUFAF3	ILMN_2354515	ENSG00000178057	NADH:ubiquinone oxidoreductase complex assembly factor 3
NDUFB10	ILMN_1811754	ENSG00000140990	NADH:ubiquinone oxidoreductase subunit B10
NDUFB11	ILMN_1749709	ENSG00000147123	NADH:ubiquinone oxidoreductase subunit B11
NDUFB6	ILMN_2369924	ENSG00000165264	NADH:ubiquinone oxidoreductase subunit B6
NDUFB7	ILMN_1813604	ENSG00000099795	NADH:ubiquinone oxidoreductase subunit B7
NDUFB8	ILMN_1661170	ENSG00000166136	NADH:ubiquinone oxidoreductase subunit B8
NDUFS3	ILMN_1756355	ENSG00000213619	NADH:ubiquinone oxidoreductase core subunit S3
NDUFS4	ILMN_1812312	ENSG00000164258	NADH:ubiquinone oxidoreductase subunit S4
NDUFS5	ILMN_1776104	ENSG00000168653	NADH:ubiquinone oxidoreductase subunit S5
NDUFS7	ILMN_1669966	ENSG00000115286	NADH:ubiquinone oxidoreductase core subunit S7
NDUFS8	ILMN_1794132	ENSG00000110717	NADH:ubiquinone oxidoreductase core subunit S8
NDUFV1	ILMN_1786718	ENSG00000167792	NADH:ubiquinone oxidoreductase core subunit V1
NDUFV2	ILMN_2086417	ENSG00000178127	NADH:ubiquinone oxidoreductase core subunit V2
NDUFV3	ILMN_1765500	ENSG00000160194	NADH:ubiquinone oxidoreductase subunit V3
NECAP2	ILMN_1749011	ENSG00000157191	NECAP endocytosis associated 2
NECTIN3	ILMN_2188521	ENSG00000177707	nectin cell adhesion molecule 3
NEDD8-MDP1	ILMN_1662263	ENSG00000255526	NEDD8-MDP1 readthrough
NEK1	ILMN_2162234	ENSG00000137601	NIMA related kinase 1
NEK11	ILMN_1788149	ENSG00000114670	NIMA related kinase 11
NEK3	ILMN_1695020	ENSG00000136098	NIMA related kinase 3
NELFB	ILMN_2399328	ENSG00000188986	negative elongation factor complex member B
NELFB	ILMN_1742432	ENSG00000188986	negative elongation factor complex member B
NELFCD	ILMN_1663954	ENSG00000101158	negative elongation factor complex member C/D
NEMP1	ILMN_2131336	ENSG00000166881	nuclear envelope integral membrane protein 1
NENF	ILMN_2142554	ENSG00000117691	neudesin neurotrophic factor
NEPRO	ILMN_2331658	ENSG00000163608	nucleolus and neural progenitor protein
NEURL4	ILMN_2407811	ENSG00000215041	neuralized E3 ubiquitin protein ligase 4
NFATC2IP	ILMN_2379080	ENSG00000176953	nuclear factor of activated T cells 2 interacting protein
NFATC3	ILMN_1800976	ENSG00000072736	nuclear factor of activated T cells 3
NFATC3	ILMN_2360028	ENSG00000072736	nuclear factor of activated T cells 3
NFIA	ILMN_1758049	ENSG00000162599	nuclear factor I A
NFIB	ILMN_1778991	ENSG00000147862	nuclear factor I B
NFIX	ILMN_1694325	ENSG00000008441	nuclear factor I X
NFU1	ILMN_2406468	ENSG00000169599	NFU1 iron-sulfur cluster scaffold
NFX1	ILMN_1804610	ENSG00000086102	nuclear transcription factor, X-box binding 1
NFX1	ILMN_1744959	ENSG00000086102	nuclear transcription factor, X-box binding 1
NFXL1	ILMN_1682197	ENSG00000170448	nuclear transcription factor, X-box binding like 1
NFYB	ILMN_1668726	ENSG00000120837	nuclear transcription factor Y subunit beta
NFYC	ILMN_1810488	ENSG00000066136	nuclear transcription factor Y subunit gamma
NIF3L1	ILMN_1777066	ENSG00000196290	NGG1 interacting factor 3 like 1
NINL	ILMN_1789094	ENSG00000101004	ninein like
NIPBL	ILMN_2264625	ENSG00000164190	NIPBL cohesin loading factor
NIPSNAP2	ILMN_1778611	ENSG00000146729	nipsnap homolog 2
NISCH	ILMN_1735827	ENSG00000010322	nischarin
NIT2	ILMN_2200503	ENSG00000114021	nitrilase family member 2
NKAPD1	ILMN_1728965	ENSG00000150776	NKAP domain containing 1
NKG7	ILMN_1682993	ENSG00000105374	natural killer cell granule protein 7
NKTR	ILMN_1721621	ENSG00000114857	natural killer cell triggering receptor
NKTR	ILMN_2330994	ENSG00000114857	natural killer cell triggering receptor
NLRP14	ILMN_1782651	ENSG00000158077	NLR family pyrin domain containing 14
NME3	ILMN_1669456	ENSG00000103024	NME/NM23 nucleoside diphosphate kinase 3
NME6	ILMN_2229032	ENSG00000172113	NME/NM23 nucleoside diphosphate kinase 6
NMRAL1	ILMN_1709814	ENSG00000153406	NmrA like redox sensor 1
NMT1	ILMN_1762678	ENSG00000136448	N-myristoyltransferase 1
NOA1	ILMN_1665066	ENSG00000084092	nitric oxide associated 1
NOL12	ILMN_2151368	ENSG00000273899	nucleolar protein 12
NOL7	ILMN_1803853	ENSG00000225921	nucleolar protein 7
NONO	ILMN_2052790	ENSG00000147140	non-POU domain containing octamer binding
NOP53	ILMN_1703565	ENSG00000105373	NOP53 ribosome biogenesis factor
NOSIP	ILMN_1759436	ENSG00000142546	nitric oxide synthase interacting protein
NOXA1	ILMN_1799589	ENSG00000188747	NADPH oxidase activator 1
NPAT	ILMN_2120965	ENSG00000149308	nuclear protein, coactivator of histone transcription
NPEPPS	ILMN_2116127	ENSG00000141279	aminopeptidase puromycin sensitive
NPHP3	ILMN_1730539	ENSG00000113971	nephrocystin 3
NPM1P7	ILMN_1711702	ENSG00000213443	nucleophosmin 1 pseudogene 7
NPM3	ILMN_2110252	ENSG00000107833	nucleophosmin/nucleoplasmin 3
NPR2	ILMN_1808898	ENSG00000159899	natriuretic peptide receptor 2
NPRL2	ILMN_2191568	ENSG00000114388	NPR2 like, GATOR1 complex subunit
NPRL3	ILMN_2369580	ENSG00000103148	NPR3 like, GATOR1 complex subunit
NPTN	ILMN_2336982	ENSG00000156642	neuroplastin
NR1H3	ILMN_1814022	ENSG00000025434	nuclear receptor subfamily 1 group H member 3
NR2C1	ILMN_1728983	ENSG00000120798	nuclear receptor subfamily 2 group C member 1
NR2F2	ILMN_2094360	ENSG00000185551	nuclear receptor subfamily 2 group F member 2
NR3C1	ILMN_2389347	ENSG00000113580	nuclear receptor subfamily 3 group C member 1
NR3C2	ILMN_2210934	ENSG00000151623	nuclear receptor subfamily 3 group C member 2
NRDC	ILMN_1800897	ENSG00000078618	nardilysin convertase
NRDE2	ILMN_1740165	ENSG00000119720	NRDE-2, necessary for RNA interference, domain containing
NRDE2	ILMN_2374076	ENSG00000119720	NRDE-2, necessary for RNA interference, domain containing
[truncated: 1,890 more rows]

## Sheet: Elevated after BS Unique Genes
ABCA1
ABCA10
ABCA11P
ABCB1
ABCB10
ABCB11
ABCB7
ABCB9
ABCC5
ABCC9
ABCD1
ABCG1
ABHD10
ABHD12
ABHD14A
ABHD18
ABHD8
ABI1
ABRAXAS2
ACAD8
ACAP2
ACAT1
ACBD6
ACD
ACIN1
ACKR4
ACOX2
ACP1
ACP2
ACP6
ACSM5
ACSS1
ACSS2
ACTA2
ACTG1P4
ACTL6A
ACTMAP
ACTR10
ACTR1B
ACTR5
ACTR6
ACTR8
ACVR1
ACVR2A
ACVRL1
ACYP1
ADAM28
ADAMTS5
ADAMTS6
ADAMTSL1
ADAP2
ADCK2
ADCY3
ADD1
ADD3
ADGRG2
ADGRG5
ADGRL2
ADH1A
ADH1B
ADHFE1
ADISSP
ADNP
ADORA3
ADRA1B
ADSL
ADSS1
ADSS2
AEBP1
AGAP3
AGAP4
AGAP6
AGBL5
AGGF1
AGO1
AGTR1
AHI1
AHSA2P
AIP
AJM1
AKAP11
AKIP1
AKR1A1
AKR1B1
ALDH3B1
ALDH7A1
ALDH7A1P1
ALG3
ALG5
ALK
ALKBH3
ALKBH4
ALKBH5
ALKBH7
ALKBH8
ALPK2
ALS2
ALX1
AMACR
AMDHD2
AMER1
AMHR2
AMMECR1
AMT
AMY1A
AMY1B
AMY1C
AMY2A
AMY2B
ANAPC1
ANAPC16
ANAPC1P2
ANAPC1P4
ANAPC4
ANAPC5
ANG
ANGEL2
ANKAR
ANKFY1
ANKHD1-EIF4EBP3
ANKMY2
ANKRA2
ANKRD12
ANKRD16
ANKRD36C
ANKRD40CL
ANKRD49
ANKRD50
ANKRD6
ANKS1A
ANKZF1
ANP32AP1
ANP32B
ANTXR1
ANXA11
ANXA2R
ANXA7
AP1S1
AP2B1
AP2S1
AP3M2
AP4B1
APBB3
APEH
APEX1
APH1A
API5
APMAP
APOBEC3C
APOC1
APOE
APOM
APPBP2
APPL2
APRT
APTX
ARAP1
ARF5
ARFGAP1
ARFGAP2
ARHGAP1
ARHGAP12
ARHGAP19
ARHGAP24
ARHGAP28
ARHGAP32
ARHGAP33
ARHGEF18
ARHGEF25
ARHGEF7
ARHGEF9
ARID2
ARID3A
ARID4A
ARL1
ARL10
ARL2BP
ARL3
ARL6IP1
ARL6IP4
ARL6IP5
ARMC1
ARMC7
ARMCX2
ARMCX5
ARMCX5-GPRASP2
ARMCX6
ARMCX7P
ARNT
ARPC1A
ARPC5
ARPIN
ARRB1
ARRDC1-AS1
ARRDC2
ARSD
ASAP3
ASB1
ASB13
ASB3
ASB8
ASCL2
ASF1A
ASH2L
ASIC1
ASIC4
ASIP
ASTE1
ATG12
ATG14
ATG5
ATL1
ATM
ATOH8
ATP5F1A
ATP5F1D
ATP5IF1
ATP5MC2
ATP5ME
ATP5MG
ATP5MJ
ATP5PB
ATP5PD
ATP5PO
ATP6AP1
ATP6AP1L
ATP6V0A1
ATP6V1C1
ATP6V1E1
ATP6V1G1
ATP6V1G2-DDX39B
ATP8B2
ATP8B4
ATPAF1
ATRAID
ATRN
ATXN1
ATXN3
AUTS2
AXIN2
AZGP1
AZIN1
B3GALNT1
B3GALT5
B4GALNT4
BABAM1
BACE1
BAG6
BAIAP2-DT
BAZ2B
BBS1
BBS12
BBS2
BBS4
BCAT2
BCDIN3D
BCKDHA
BCL2L12
BCL7C
BCL9
BCO1
BCS1L
BEND5
BEND6
BET1
BET1L
BEX4
BHLHA15
BHLHE22
BICRAL
BIN1
BIRC6
BIVM
BIVM-ERCC5
BLMH
BLOC1S1
BLOC1S5
BLVRA
BMF
BMI1
BMP7
BNC2
BNIPL
BOC
BORCS6
BRAT1
BRCA2
BRCC3
BRCC3P1
BRD3
BRD7
BRD8
BRD9
BRF2
BRI3
BRINP3
BRK1
BRWD1
BSCL2
BSDC1
BTBD7
BTF3
BTN2A1
BTN2A2
BTN3A1
BUB3
BUD13
C10orf88
C11orf24
C11orf54
C11orf68
C12orf57
C12orf76
C14orf28
C14orf93
C15orf40
C17orf49
C17orf58
C18orf21
C18orf54
C19orf25
C19orf44
C19orf48P
C19orf53
C1orf21
C1orf35
C1orf50
C1orf74
C1QTNF3
C1QTNF3-AMACR
C1QTNF4
C1QTNF6
C1R
C2CD5
C3orf18
C3orf70
C4orf46
C5
C5orf15
C6
C6orf136
C6orf47
C6orf58
C7
C7orf50
C8orf44
C8orf48
C8orf58
C8orf82
C9orf78
C9orf85
CA11
CA12
CA3
CABIN1
CABLES1
CABLES2
CACNA2D3
CACNA2D4
CAD
CALHM2
CALM3
CALML4
CAMSAP1
CAPG
CAPN1
CAPN3
CAPN5
CAPS
CARF
CARM1
CARMIL1
CASP2
CASP6
CAVIN3
CBFA2T2
CBLN3
CBR1
CBR3
CBR4
CBS
CBX6
CBX7
CBY1
CCAR2
CCDC112
CCDC115
CCDC12
CCDC121
CCDC136
CCDC14
CCDC154
CCDC174
CCDC191
CCDC25
CCDC28A
CCDC28B
CCDC51
CCDC6
CCDC66
CCDC71
CCDC77
CCDC8
CCDC88A
CCDC97
CCL23
CCNB1IP1
CCNF
CCNG1
CCNI
CCNQ
CCP110
CCS
CCSAP
CCT6B
CD1C
CD2
CD24
CD24P4
CD276
CD2BP2
CD34
CD3D
CD3G
CD47
CD63
CD70
CD99
CD99L2
CDAN1
CDC14A
CDC16
CDC23
CDC40
CDC42SE2
CDCA7L
CDH11
CDHR3
CDK10
CDK13
CDK14
CDK15
CDK19
CDK4
CDK5RAP1
CDK5RAP3
CDKN1B
CDKN1C
CDKN2C
CDNF
CDPF1
CDS1
CEBPA
CELF2
CELF6
CENATAC
CENPB
CENPJ
CENPQ
CENPW
CENPX
CEP131
CEP162
CEP192
CEP44
CEP57
CEP57L1
CEP83
CEP95
CEPT1
CERK
CETP
CFAP410
CFAP61
CFAP68
CGGBP1
CHAMP1
CHCHD6
CHD8
CHD9
CHEK2
CHKA
CHKB
CHKB-CPT1B
CHMP2A
CHMP6
CHODL
CHP1
CHRNA1
CHRNB1
CHST12
CHST14
CIAO1
CIAO2A
CIB1
CIDEA
CIDEB
CIPC
CIR1
CIRBP
CISD2
CITED2
CKAP2
CKAP5
CKB
CKS1B
CKS1BP2
CKS1BP3
CLCN6
CLCN7
CLDN12
CLDN23
CLDN3
CLEC11A
CLEC2B
CLEC2D
CLEC3B
CLEC4GP1
CLK2
CLK4
CLN5
CLNS1A
CLPX
CLSTN1
CLTA
CLU
CMA1
CMAS
CMKLR1
CMSS1
CMTM3
CMTR2
CNIH3
CNN2
CNNM3
CNOT1
CNOT10
CNOT11
CNOT6
CNOT7
CNOT7P2
CNPPD1
CNPY2
CNPY4
CNRIP1
CNTN1
COA3
COA5
COASY
COG1
COG2
COG3
COIL
COL13A1
COL1A1
COL1A2
COL3A1
COL5A1
COL6A1
COL6A2
COL6A3
COLCA1
COLEC12
COLGALT1
COLQ
COMMD1
COMMD3
COMMD3-BMI1
COMMD6
COMMD9
COMTD1
COP1
COPE
COPS4
COPS6
COPS7A
COPS7B
COPZ1
COQ10A
COQ2
COQ3
COQ5
COQ7
COQ8A
CORO1B
CORO2B
CORO6
COX11
COX14
COX16
COX19
COX20
COX4I1
COX5B
COX6C
COX7A2
COX7C
COX8A
CPA3
CPE
CPEB1
CPLX2
CPNE1
CPNE3
CPQ
CPSF1
CPSF2
CPSF3
CPTP
CPXM1
CPZ
CRABP2
CRAMP1
CREBZF
CRELD1
CRELD2
CRNKL1
CROT
CRTC2
CRYGS
CRYL1
CRYM
CRYZ
CS
CSE1L
CSNK1G1
CSNK2A2
CSNK2B
CSTF3
CTBP1
CTDNEP1
CTDSP1
CTDSP2
CTDSPL
CTDSPL2
CTHRC1
CTNNBIP1
CTNNBL1
CTNS
CTPS2
CTSG
CTSH
CTSK
CTSO
CTXN1
CUBN
CUL2
CUL3
CUL4B
CUL5
CUL7
CUL9
CUTA
CWC15
CWF19L1
CWF19L2
CX3CR1
CXCL12
CXCR6
CXXC1
CXXC5
CYC1
CYGB
CYP27A1
CYP27C1
CYP2E1
CYP2R1
CYP3A5
CYP4F12
CYP4V2
CYREN
CZIB
D2HGDH
DAB2
DACT2
DAD1
DAPK2
DARS1
DBN1
DBNL
DBP
DBR1
DBT
DCAF11
DCAF15
DCAF16
DCAF5
DCAF6
DCAF7
DCANP1
DCDC1
DCLK1
DCLRE1A
DCLRE1C
DCN
DCP1B
DCP2
DCTD
DCTN1
DCTN2
DCTN3
DCUN1D2
DCXR
DDB1
DDIT4L
DDOST
DDX17
DDX19B
DDX39B
DDX42
DDX46
DDX50
DECR1
DEFB119
DELE1
DENND11
DENND2A
DENND2B
DENND2D
DENND4C
DENND6A
DENND6B
DENR
DEPDC1
DEPDC7
DERA
DERL2
DET1
DEXI
DFFB
DGCR2
DGKZ
DGUOK
DHFR2
DHPS
DHRS1
DHRS12
DHRS3
DHRS4
DHRS7
DHRSX
DHX16
DHX35
DHX40
DHX58
DIABLO
DIDO1
DIP2B
DISP1
DMAC1
DMAC2
DMAP1
DMTF1
DNAH1
DNAJA3
DNAJB2
DNAJC10
DNAJC13
DNAJC17
DNAJC19
DNAJC30
DNAJC7
DNAJC8
DNAJC9
DNAL4
DNASE1L2
DNM1
DOCK1
DOK4
DOLK
DOP1A
DPCD
DPF2
DPH5
DPH6
DPM3
DPP4
DPP7
DPYD
DPYSL2
DPYSL3
DR1
DRAM1
DRD4
DRG1
DRG2
DSN1
DTD1
DTNB
DTX2P1-UPK3BP1-PMS2P11
DTX3
DUS2
DUS4L
DUSP12
DUT
DVL2
DXO
DYM
DYNAP
DYNC1I2
DYNC2H1
DYNC2I1
DYNLRB1
DYRK1B
DYRK2
DYRK4
E4F1
EAF1-AS1
EARS2
EBAG9
EBF1
EBF3
EBP
ECHDC2
ECI1
ECI2
ECM1
ECPAS
ECSIT
EDA
EDC3
EDF1
EDNRA
EDRF1
EEF1AKMT3
EEF1B2
EEF1B2P6
EEF1D
EEF1G
EEF2
EEF2K
EEIG1
EFEMP2
EFHC1
EFNB1
EFS
EGFR
EI24
EID1
EIF2A
EIF2B1
EIF2B4
EIF2D
EIF2S3
EIF3D
EIF3E
EIF3EP1
EIF3F
EIF3G
EIF3H
EIF3K
EIF3L
EIF4A2
EIF4B
EIF4BP6
EIF4EBP1
EIF4EBP2
EIF4ENIF1
ELANE
ELF2
ELMO2
ELOB
ELOF1
ELOVL4
ELOVL6
ELP2
ELP3
EMC4
EMC9
EMILIN1
EMX2
ENAH
ENDOV
ENKD1
ENO2
ENOPH1
ENOX2
ENTPD8
EOMES
EP400
EPG5
EPM2AIP1
EPN1
EPRS1
EPS15
ERAL1
ERCC1
ERCC2
ERCC3
ERCC5
ERCC6
ERCC6L2
ERGIC3
ERH
ERLEC1
ERMARD
ERP27
ERP29
ERP44
ESCO1
ESD
ESR1
ETV5
ETAA1
EVL
EWSR1
EXOC1
EXOSC1
EXOSC10
EXOSC7
EXOSC8
EXPH5
F10
F8A1
FAM104B
FAM111A
FAM117A
FAM117B
FAM120A
FAM124B
FAM133B
FAM136A
FAM13A
FAM13B
FAM13C
FAM153CP
FAM161A
FAM172A
FAM174B
FAM181B
FAM200C
FAM210B
FAM217B
FAM219B
FAM220A
FAM220CP
FAM24B
FAM3A
FAM50A
FAM50B
FAM76B
FAM83E
FAM8A1
FAM98C
FANCE
FANCG
FAP
FASLG
FASTK
FAU
FAXDC2
FBH1
FBL
FBLN1
FBLN7
FBXL14
FBXL15
FBXL4
FBXO17
FBXO21
FBXO31
FBXO4
FBXW8
FCGR2A
FCGRT
FCHO2
FCRLB
FCSK
FECH
FGD1
FGF7
FGFBP2
FGG
FHDC1
FHIP2A
FHOD3
FIBP
FIG4
FIGNL1
FIRRM
FKBP10
FKBP2
FKBP7
FKBP9P1
FLRT2
FLT3LG
FLYWCH1
FMO1
FMO4
FNBP1
FNDC1
FNDC5
FOLR2
FOXJ2
FOXJ3
FOXK1
FOXN2
FOXRED1
FOXRED2
FPGT
FRA10AC1
FRAS1
FRG1
FRMD6
FRS3
FSCN1
FSCN3
FSTL1
FUCA1
FUNDC1
FUOM
FUT10
FUT4
FUT8
FXYD1
FYN
FZD2
FAAP100
GAB3
GABARAP
GABRE
GALC
GALK2
GALM
GALNT11
GALNT12
GALNT16
GALNT6
GALT
GAMT
GARNL3
GAS1
GAS6
GAS7
GATA2
GATA3
GATAD1
GATD1
GATD3
GATM
GBP2
GCHFR
GDE1
GDI2
GEMIN2
GEMIN6
GEMIN8
GFRA1
GFRA2
GGA2
GGA3
GGNBP2
GHDC
GHITM
GHRL
GID8
GIGYF1
GIMAP1
GIMAP2
GIMAP4
GIMAP8
GIN1
GINS3
GLE1
GLG1
GLI2
GLI3
GLIS3
GLMN
GLMP
GLOD4
GLT8D1
GLT8D2
GLYCTK
GMNN
GMPR2
GNAI2
GNPAT
GNPDA1
GNPTG
GNRH1
GOLGA2
GOLGA7
GOLPH3L
GON4L
GOPC
GOT2
GPATCH1
GPATCH3
GPATCH8
GPC4
GPD1L
GPHN
GPM6A
GPN1
GPNMB
GPR78
GPRASP2
GPRASP3
GPRC5B
GPS1
GPSM2
GPX7
GPX8
GRAMD2B
GRAP
GRIN1
GRK5
GRN
GRPEL2
GRSF1
GSC
GSDMB
GSDME
GSPT2
GSTA4
GSTP1
GTF2H4
GTF3C2
GTF3C3
GTF3C5
GTPBP3
GUCA1B
GUK1
GUSB
GUSBP13
GUSBP14
GUSBP15
GUSBP16
GUSBP17
GUSBP18
GUSBP3
GYPC
GZMA
GZMH
H1-0
H1-10
H2AJ
H2BC11
H2BC14
H4C3
HADH
HAND2
HARS1
HARS2
HAUS4
HCFC1
HCFC1R1
HCRTR2
HDAC2
HDAC3
HDAC4
HDDC2
HDDC3
HDGFL2
HDHD2
HDHD5
HEATR5B
HEATR6
HECTD2
HECTD3
HELQ
HEPH
HERC2
HERC2P4
HERC2P5
HERC2P8
HERC4
HES2
HESX1
HEXB
HEXIM2
HHEX
HIBADH
HID1
HIGD2A
HIPK1
HIRIP3
HLA-DMA
HLA-DMB
HLF
HMG20A
HMGB1
HMGB2
HMGCL
HMGN1
HMGN4
HNMT
HNRNPA0
HNRNPA1L2
HNRNPA1P10
HNRNPD
HNRNPDL
HNRNPUL1
HNRNPUL2
HNRNPUL2-BSCL2
HOXA2
HOXA3
HOXA4
HOXA5
HOXA6
HOXA9
HOXB2
HOXB3
HOXB5
HOXB7
HOXB8
HOXC10
HOXC4
HOXC6
HOXC9
HOXD12
HOXD3
HPF1
HPGD
HPS3
HPS6
HRK
HROB
HS3ST2
HSCB
HSD11B2
HSD17B14
HSD17B7
HSD17B7P2
HSD17B8
HSF2
HSF4
HSPA12B
HSPBAP1
HTR1B
HTRA2
HYI
IARS2
IBTK
ICE2
ID1
IDH2
IDH3B
IDH3G
IER3IP1
IFFO1
IFI27L2
IFT122
IFT172
IFT25
IFT52
IFT74
IFT88
IGBP1
IGDCC4
IGF1
IGF1R
IGF2BP3
IGFBP4
IGFBP5
IGIP
IGLL1
IGSF10
IGSF3
IHO1
IK
IL10RA
IL11RA
IL13RA1
IL16
IL17RC
IL17RD
IL18BP
IL2RB
ILK
ILVBL
IMP3
IMPACT
IMPDH2
INCENP
ING4
INKA1
INO80B
INO80B-WBP1
INPP5B
INPPL1
INSIG2
INTS1
INTS10
INTS11
INTS4
INTS8
IP6K1
IPO9
IQCC
IQCK
IRF2BP1
IRF2BP2
IRF6
IRS1
IRX3
IRX5
ISCA2
ISCU
ISLR
IST1
ITCH
ITGA11
ITM2C
ITPA
IZUMO1R
IZUMO4
JADE1
JADE2
JAM3
JCHAIN
JMJD7-PLA2G4B
JMJD8
JRK
JTB
JUP
KANSL1
KANSL3
KARS1
KAT2A
KAT8
KAZALD1
KBTBD3
KBTBD6
KBTBD7
KCNF1
KCNJ8
KCNMA1
KCNMB4
KCNRG
KCTD18
KCTD2
KCTD21
KCTD3
KCTD7
KDELR1
KDM1A
KDM3A
KDM3B
KDM5B
KHDC1-AS1
KHDC4
KHDRBS1
KHNYN
KIDINS220
KIF20B
KIZ
KIAA1191
KIAA1328
KIAA2013
KL
KLF12
KLHDC2
KLHDC3
KLHDC9
KLHL12
KLHL13
KLHL22
KLHL28
KLHL3
KLHL4
KLHL41
KLHL42
KLHL7
KLHL8
KLHL9
KLK4
KLRA1P
KLRB1
KLRD1
KLRF1
KMT2A
KNOP1
KNTC1
KPNA5
KRBOX4
KRCC1
KRIT1
KRT222
KRTCAP2
KYAT3
L3MBTL1
L3MBTL2
L3MBTL3
LAGE3
LAMP3
LAMTOR1
LAMTOR3
LARGE1
LAS1L
LAT
LBX2
LCMT1
LDHD
LEAP2
LEMD2
LETMD1
LGALS3
LHFPL6
LIAS
LIG1
LIME1
LIN37
LIN54
LIN9
LINC00173
LINC01011
LINC01089
LINC01618
LINC02802
LINC02875
LINC02897
LINC02913
LIPC
LIPT1
LLGL1
LMAN2L
LMF2
LMO3
LMTK2
LMX1A
LNPK
LOXL1
LPAR1
LPAR4
LPAR5
LPP
LRATD2
LRIG1
LRIG2
LRIG3
LRP3
LRPAP1
LRPPRC
LRRC14
LRRC17
LRRC20
LRRC37B
LRRC47
LRRC75B
LRRC8D
LRRCC1
LRRN4CL
LRRTM2
LRTM1
LSAMP
LSM14A
LSM2
LSM7
LSP1
LSP1P4
LSP1P5
LSS
LTA4H
LTO1
LUC7L3
LURAP1
LURAP1L
LYPLAL1
LYRM4
LYSMD4
LZTS2
MACROD1
MADD
MAF
MAGED2
MAGEE1
MAGEF1
MAN1B1
MAN1C1
MAN2B1
MANBAL
MAP1A
MAP2K4
MAP2K5
MAP3K4
MAP4K1
MAP6D1
MAPKAPK5-AS1
MARCKS
MARF1
MAT1A
MAT2B
MATR3
MATR3P1
MAU2
MBIP
MBLAC2
MBP
MC1R
MCEE
MCM2
MCM3
MCM3AP
MCM4
MCM6
MCM7
MCM8
MCOLN3
MCRIP1
MCRS1
MDC1
MDH2
MDK
MDM1
MDP1
MEA1
MED16
MED18
MED22
MED23
MED29
MED30
MED9
MEF2C
MEF2D
MEG3
MEIS2
MEN1
MEOX2
MESP1
METAP1
METTL13
METTL17
METTL18
METTL25
METTL3
METTL4
MEX3B
MFAP4
MFSD5
MGA
MGAT4B
MGME1
MIA2
MIB1
MIEF1
MIF4GD
MIIP
MINAR1
MINDY3
MIOS
MIPEP
MIPOL1
MIR106B
MIR1225
MIR1227
MIR1229
MIR186
MIR1914
MIR198
MIR25
MIR33B
MIR3942
MIR4647
MIR4653
MIR4680
MIR4721
MIR4723
MIR4750
MIR4771-1
MIR4771-2
MIR5193
MIR6514
MIR6736
MIR6745
MIR6748
MIR6752
MIR6759
MIR6777
MIR6782
MIR6785
MIR6812
MIR6833
MIR6834
MIR6838
MIR6850
MIR6858
MIR7111
MIR93
MIR939
MIR99AHG
MIS18BP1
MITD1
MITF
MIX23
MKKS
MKLN1
MKRN1
MKX
MLH1
MLLT10
MLST8
MMAB
MMP11
MMP14
MMP2
MMP23A
MMP23B
MMP27
MMS19
MNS1
MOB3B
MOCOS
MOCS1
MOGAT1
MOSPD3
MOV10
MPC1
MPHOSPH8
MPPE1
MPST
MPV17
MPZL1
MRC2
MRFAP1L1
MRFAP1L2
MRGBP
MRI1
MRM2
MRNIP
MRPL1
MRPL11
MRPL16
MRPL2
MRPL21
MRPL22
MRPL23
MRPL30
MRPL35
MRPL37
MRPL38
MRPL40
MRPL43
MRPL45
MRPL48
MRPL49
MRPL51
MRPL55
MRPL9
MRPS10
MRPS18A
MRPS18B
MRPS21
MRPS22
MRPS24
MRPS27
MRPS31
MRPS31P5
MRPS33
MRPS34
MRPS5
MRPS9
MRRF
MRS2
MS4A2
MSANTD4
MSH5
MSH5-SAPCD1
MSMP
MTA1
MTA3
MTBP
MTCH1
MTIF2
MTMR11
MTMR14
MTMR4
MTREX
MTRFR
MTSS1
MTX3
MUTYH
MVB12A
MXD3
MXD4
MXI1
MYB
MYCBP2
MYCN
MYG1
MYH10
MYL1
MYL12B
MYL6B
MYLIP
MYO1D
MYO5B
MYO7A
MYO9A
N4BP2L2
N6AMT1
NABP2
NACA
NAE1
NAGK
NAGLU
NAP1L1
NAP1L3
NAP1L4
NAPB
NAPRT
NARS1
NASP
NAV1
NBAS
NBN
NBPF1
NBPF11
NBPF26
NBPF2P
NBPF3
NBPF8
NCAL1
NCALD
NCAPD2
NCAPH2
NCK1
NCOA1
NCOR2
NCR3
NDN
NDUFA11
NDUFA12
NDUFA13
NDUFA4
NDUFA5
NDUFA5P12
NDUFA9
NDUFA9P1
NDUFAF2
NDUFAF3
NDUFB10
NDUFB11
NDUFB6
NDUFB7
NDUFB8
NDUFS3
NDUFS4
NDUFS5
NDUFS7
NDUFS8
NDUFV1
NDUFV2
NDUFV3
NECAP2
NECTIN3
NEDD8-MDP1
NEK1
NEK11
NEK3
NELFB
NELFCD
NEMP1
NENF
NEPRO
NEURL4
NFATC2IP
NFATC3
NFIA
NFIB
NFIX
NFU1
NFX1
NFXL1
NFYB
NFYC
NIF3L1
NINL
NIPBL
NIPSNAP2
NISCH
NIT2
NKAPD1
NKG7
NKTR
NLRP14
NME3
NME6
NMRAL1
NMT1
NOA1
NOL12
NOL7
None
NONO
NOP53
NOSIP
NOXA1
NPAT
NPEPPS
NPHP3
NPM1P7
NPM3
NPR2
NPRL2
NPRL3
NPTN
NR1H3
NR2C1
NR2F2
NR3C1
NR3C2
NRDC
NRDE2
NREP
NRROS
NRSN2
NSA2
NSD1
NSD3
NSFL1C
NSL1
NSMCE1
NSMCE2
NSUN5
NSUN5P1
NSUN5P2
NT5C
NT5C1B-RDH14
NT5DC2
NT5E
NTAN1
NTN4
NUCB2
NUDC
NUDCD3
NUDT1
NUDT11
NUDT18
NUDT2
NUDT22
NUMA1
NUP133
NUP37
NUP42
NUP43
NUP62
NUP85
NUPR1
NVL
NXF1
NXPH3
NAA16
NAA80
NAALAD2
OARD1
OBI1
OCIAD1
ODAD4
OGFOD3
OGG1
OGN
OGT
OLFM4
OLFML1
OLFML3
OR10Q1
ORAI3
ORC2
ORC3
ORC4
ORC5
ORMDL3
OSBPL2
OSBPL3
OSBPL5
OSBPL7
OSGEP
OSGEPL1
OSR2
OTUB1
OXA1L
OXLD1
OXR1
P2RX4
P2RX7
P2RY6
P3H1
P3H3
P3H4
P4HA2
P4HTM
PABPC5
PACSIN3
PAFAH1B1
PAGR1
PAK6-AS1
PALB2
PAN3
PANK2
PAOX
PAPLN
PAPSS1
PAQR7
PAQR8
PARK7
PARL
PARN
PARP11
PARP16
PARP2
PARP4
PARPBP
PATZ1
PAX8
PAXIP1
PCBD1
PCBD2
PCBP2
PCDH18
PCDH7
PCDHB12
PCDHB4
PCGF1
PCGF2
PCID2
PCIF1
PCK2
PCM1
PCMT1
PCMTD1
PCMTD2
PCNA
PCNP
PCNX4
PDCD4
PDCD6
PDE1A
PDE1B
PDE5A
PDE7A
PDE7B
PDGFB
PDGFD
PDGFRA
PDGFRB
PDGFRL
PDHB
PDIA5
PDIK1L
PDK2
PDLIM7
PDP1
PDPK1
PDPR
PDS5B
PDXP
PDZRN4
PEAR1
PEG10
PEX1
PEX11B
PEX16
PFDN5
PFDN6
PGAP3
PGBD1
PGLS
PGPEP1
PGRMC1
PHAF1
PHB2
PHC1
PHETA2
PHF12
PHF2
PHF20L1
PHF3
PHIP
PHKA2
PHKG2
PHLDA3
PHPT1
PHYH
PIAS1
PIAS3
PIAS4
PIBF1
PIDD1
PIEZO2
PIGC
PIGM
PIGT
PIGU
PIH1D1
PIK3IP1
PIK3R1
PIK3R2
PIN1
PIN4
PINK1-AS
PIP4P2
PITX2
PIWIL2
PJA2
PKD1
PKD1L2
PKIA
[truncated: 1,355 more rows]

## Sheet: Elevated after BS Bioplanet
Term	Overlap	P-value	Adjusted P-value	Odds Ratio	Combined Score	Genes
Gene expression	310/968	4.33218e-33	5.83978e-30	2.47449	184.397	EIF4A2;RPL4;RPL5;RPL30;ZNF175;RPL3;RPL31;RPL8;RPL9;RPL7;RPS15;RPS14;RPS17;PSMD4;SNRPD2;RPL18A;RPS19;ZNF607;PPP2R1A;ZNF606;ZSCAN32;RPL36;RPL38;RPS11;RPL39;RPS10;EARS2;RPS13;RPS12;ZNF17;ZNF287;ZNF18;RPL21;ZNF160;ZFP2;RPL22;METTL3;ZNF10;PRKCA;CDC40;SRRM1;PPA2;XRN1;CLNS1A;PSME1;CD2BP2;RPL24;RPL27;RPL26;UBA52;ZNF398;CSTF3;ZNF20;SUPT4H1;ZNF25;GSPT2;NUP85;PCBP2;SSR1;PSMF1;ZNF266;ZNF264;TNFSF13;UPF3B;UPF…
Translation	86/151	3.51611e-29	2.36986e-26	6.71296	439.817	EIF4A2;RPL4;RPL5;RPL30;TRAM1;RPL3;RPL31;RPLP1;RPL10A;RPL8;RPL9;RPL7;EEF1B2;RPS15;RPS4X;RPS14;RPL7A;SEC61A1;RPS17;RPL18A;RPS19;RPL36AL;SEC61G;RPL36;RPL38;RPS11;EIF2B1;RPL39;RPS10;RPS13;RPS12;RPS9;RPL21;SSR4;RPS5;SSR2;RPL22;RPS6;RPL13A;RPSA;RPS3A;DDOST;SRP9;EEF1G;EEF1D;RPL24;RPL27;RPL26;UBA52;RPL12;RPL11;RPL36A;GSPT2;RPS15A;EIF4EBP1;RPL14;RPS3;SSR1;RPL13;RPS2;RPL18;RPL17;SEC11A;EIF4B;RPL19;EIF2B4;R…
Cytoplasmic ribosomal proteins	67/108	4.79916e-26	2.15642e-23	8.25525	481.271	RPL4;RPL5;RPL30;RPL3;RPL31;RPLP1;RPL10A;RPL8;RPL9;RPL7;RPS15;RPS4X;RPS14;RPL7A;RPS17;RPL18A;RPS19;RPS6KA2;RPL36;RPL38;RPS11;RPL39;RPS10;RPS13;RPS12;RPS9;RPL21;RPS5;RPL22;RPS6;RPL13A;RPL9P7;RPSA;RPS3A;RPL24;RPL27;RPL26;UBA52;RPL12;RPL11;RPL36A;RPS15A;RPL14;RPS3;RPL13;RPS2;RPL18;RPL17;RPL19;RPL35A;RPL23A;RPS25;RPS28;RPS27;EIF3K;RPS29;RPL27A;RPS6KB2;EIF3G;EIF3H;EIF3E;EIF3F;FAU;GRSF1;RPS21;EIF3D;RPS24
Influenza viral RNA transcription and replication	68/125	8.00463e-22	2.69756e-19	6.02264	292.561	RPL4;RPL5;RPL30;RPL3;RPL31;RPLP1;RPL10A;RPL8;RPL9;RPL7;SMG6;RPS15;RPS4X;RPS14;RPL7A;RPS17;RPL18A;RPS19;PPP2R1A;RPL36;RPL38;RPS11;RPL39;RPS10;RPS13;RPS12;UPF2;RPS9;RPL21;RPS5;RPL22;RPS6;RPL13A;RPSA;RPS3A;RPL24;RPL27;RPL26;UBA52;RPL12;RPL11;RPL36A;GSPT2;RPS15A;POLR2B;RPL14;RPS3;POLR2F;RPL13;POLR2G;RPS2;POLR2I;RPL18;RPL17;RPL19;UPF3B;RPL35A;UPF3A;RPL23A;RPS25;RPS28;RPS27;RPS29;RPL27A;FAU;GRSF1;RPS21…
Influenza infection	69/142	1.45538e-18	3.9237e-16	4.76861	195.853	RPL4;RPL5;RPL30;RPL3;RPL31;RPLP1;CLTA;RPL10A;RPL8;RPL9;RPL7;RPS15;RPS4X;RPS14;RPL7A;RPS17;XPO1;RPL18A;RPS19;NUP62;RPL36;RPL38;RPS11;RPL39;RPS10;RPS13;RPS12;RPS9;RPL21;NUP133;RPS5;RPL22;RPS6;RPL13A;RPSA;RPS3A;RPL24;RPL27;RPL26;UBA52;RPL12;RPL11;RPL36A;RPS15A;NUP85;POLR2B;RPL14;RPS3;POLR2F;RPL13;NUP43;POLR2G;RPS2;POLR2I;RPL18;RPL17;RPL19;RPL35A;RPL23A;RPS25;RPS28;RPS27;RPS29;RPL27A;FAU;GRSF1;RPS21;…
Cap-dependent translation initiation	42/73	3.51738e-15	7.90238e-13	6.79669	226.201	EIF4A2;RPL4;RPL5;RPL30;RPL3;RPL31;RPLP1;RPL12;RPL11;RPL36A;RPL10A;RPL8;RPL9;RPL7;RPL7A;RPL18A;RPL36;RPL14;RPL13;RPL38;RPL18;RPL39;RPL17;EIF4B;RPL19;RPL21;RPL22;RPL13A;RPL35A;RPL23A;EIF2S3;EIF3K;RPL27A;EIF3G;RPL24;EIF3H;RPL27;EIF3E;RPL26;EIF3F;UBA52;EIF3D
Activation of mRNA upon binding of the cap-binding complex and eIFs, and subsequent binding to 43S	34/57	3.47612e-13	6.69402e-11	7.40155	212.333	EIF4A2;RPS15;RPS4X;RPS14;RPS17;RPS15A;RPS19;EIF4EBP1;RPS3;RPS2;RPS11;RPS10;RPS13;EIF4B;RPS12;RPS9;RPS5;RPS6;RPS3A;RPSA;RPS25;RPS28;EIF2S3;RPS27;EIF3K;RPS29;EIF3G;EIF3H;EIF3E;EIF3F;FAU;EIF3D;RPS21;RPS24
Protein metabolism	134/442	7.90143e-13	1.33139e-10	2.20748	61.5149	RPL4;EIF4A2;GALNT12;RPL5;GALNT11;RPL30;RPL3;GALNT16;RPL31;RPL8;RPL10A;RPL9;TOMM20;RPL7;TOMM22;RPS15;EEF1B2;RPS14;RPS17;RPL18A;RPS19;RPL36;FBXO4;PMPCB;RPL38;RPS11;RPL39;RPS10;RPS13;RPS12;RPS9;RPL21;RPS5;RPL22;RPS6;ALG5;ALG3;RPSA;BCS1L;DPM3;RPL24;RPL27;RPL26;UBA52;GSPT2;FUT8;GRPEL2;LDHD;EIF4EBP1;SSR1;CYC1;ARSD;SEC31A;DNAJC19;EIF2B4;PMM1;DOLK;TBCB;TBCA;EEF2;CS;RPS25;RPS28;COQ2;RPS27;EIF2S3;RPS29;RPL…
Generic transcription pathway	106/377	1.89606e-08	2.83988e-06	1.97198	35.0635	ZNF573;ZNF175;RORC;RORA;NR3C1;NR3C2;ZNF607;ZNF606;ZSCAN32;ZNF205;ZNF446;ZFP37;ZNF564;MEN1;ZNF17;ZNF287;ZNF320;ZNF441;ZNF18;ZNF561;ZNF160;ZFP2;ZNF10;TBL1XR1;ZNF439;ZNF559;ZNF558;ZNF555;UBA52;ZNF433;ZNF311;ZNF398;ZNF431;ZNF20;ZNF25;MED30;ZKSCAN7;ZNF429;ZKSCAN3;ZNF425;ZKSCAN4;ZNF543;ZNF266;ZNF540;ZNF264;SMAD4;ZNF34;ESR1;ZFP69;SP1;ZNF419;ZNF30;ZNF658;ZNF415;ZNF135;ZNF133;ZNF254;ZNF493;ZNF250;THRA;CHD…
Disease	166/674	7.97097e-08	1.07449e-05	1.65415	27.0369	RPL4;RPL5;RPL30;RPL3;RPL31;RPL8;RPL10A;RPL9;RPL7;RPS15;RPS14;FGF7;RPS17;PSMD4;RPL18A;RPS19;PPP2R1A;RPL36;AP1S1;RPL38;ATP6V1E1;RPS11;RPL39;RPS10;RPS13;RPS12;RPS9;SUPT16H;ATP6V1G1;RPL21;IGFBP5;LIG1;IGFBP4;RPS5;RPL22;RPS6;PRKCA;RPSA;FRS3;PDIA5;RBX1;PSME1;RPL24;RPL27;RPL26;UBA52;VPS28;PSMD10;CUL7;CUL5;PDE1B;PDE1A;SUPT4H1;PIK3R1;NUP85;SSR1;PSMF1;ATP6V1C1;ATP6V0A1;SEC31A;KL;KLHDC3;XRCC6;XRCC5;IGF1;RPS2…
Tricarboxylic acid (TCA) cycle and respiratory electron transport	42/117	4.49782e-07	5.51188e-05	2.80186	40.9478	NDUFA13;NDUFB8;NDUFB7;NDUFA11;NDUFB10;NDUFB6;NDUFA12;NDUFB11;COX4I1;UQCR11;PDHB;UQCR10;COX5B;COX7C;UQCRH;PDPR;IDH3B;D2HGDH;CYC1;NDUFV3;NDUFV2;NDUFV1;PDK2;COX8A;NDUFA9;NDUFA5;IDH3G;MDH2;NDUFA4;ADHFE1;IDH2;SDHD;COX6C;CS;PDP1;NDUFS8;NDUFS7;NDUFS5;NDUFS4;UQCRC1;NDUFS3;SUCLG2
DNA repair	38/105	1.2376e-06	0.000139023	2.83565	38.5715	MDC1;PCNA;OGG1;XPC;BRCA2;ALKBH3;POLR2B;USP1;POLR2F;POLR2G;NBN;POLR2I;MUTYH;RFC5;XRCC6;RFC4;LIG1;RFC1;XRCC5;REV1;XRCC1;RPA2;FANCE;PALB2;GTF2H4;FANCG;DDB1;XAB2;RAD51;ERCC3;TDP1;APEX1;ERCC1;ERCC2;ATM;ERCC5;ERCC6;UBA52
RNA polymerase III transcription	21/45	2.95299e-06	0.000306202	4.36371	55.5618	GTF3C2;GTF3C3;NFIX;BRF2;POU2F1;TBP;GTF3C5;POLR3GL;NONO;NR3C1;POLR3A;NFIA;POLR3B;NFIB;POLR3C;SNAPC4;POLR1D;POLR2F;MATR3;POLR3H;POLR3K
Respiratory electron transport, ATP biosynthesis by chemiosmotic coupling, and heat production by uncoupling proteins	30/81	9.30226e-06	0.000895675	2.93675	34.023	NDUFA13;NDUFB8;NDUFB7;NDUFA11;NDUFB10;NDUFB6;NDUFA12;NDUFB11;COX4I1;UQCR11;UQCR10;COX5B;COX7C;UQCRH;CYC1;NDUFV3;NDUFV2;NDUFV1;COX8A;NDUFA9;NDUFA5;NDUFA4;SDHD;COX6C;NDUFS8;NDUFS7;NDUFS5;NDUFS4;NDUFS3;UQCRC1
DNA replication	59/207	1.60899e-05	0.00144595	1.99603	22.0308	CDKN1B;MCM7;ZWILCH;MCM8;GMNN;PPP1CC;XPO1;PSMD4;PPP2R1A;KNTC1;SPDL1;RFC5;NUDC;RFC4;LIG1;NUP133;RFC1;PPP2R5D;CKAP5;PSMA4;INCENP;ZW10;PSME1;MCM3;MCM4;MCM6;UBA52;PAFAH1B1;MCM2;PSMD10;RNASEH2B;PCNA;RNASEH2A;PRIM1;NSL1;PSMB6;ORC5;PSMB7;ORC4;DSN1;PSMB4;NUP85;ORC3;PSMB1;ORC2;NUP43;PSMF1;BUB3;RPA2;POLA1;POLA2;PSMC5;RPS27;STAG2;PSMC3;PSMC1;SSBP1;CENPQ;NUP37
DNA strand elongation	15/31	4.55079e-05	0.00383404	4.66925	46.6814	RFC5;PCNA;RFC4;MCM7;LIG1;RFC1;MCM8;PRIM1;RPA2;POLA1;POLA2;MCM3;MCM4;MCM6;MCM2
Cell cycle checkpoints	37/117	5.54413e-05	0.00439617	2.30985	22.637	PSMD10;CDKN1B;MCM7;MCM8;ORC5;PSMB6;ORC4;PSMB7;PSMB4;CDC23;PSMD4;CHEK2;ORC3;ORC2;PSMB1;PSMF1;BUB3;RFC5;RFC4;RPA2;PSMC5;PSMA4;PSMC3;PSMC1;CDC16;PSME1;MCM3;ANAPC4;MCM4;ANAPC5;ATM;RAD1;MCM6;UBA52;ANAPC1;RAD9A;MCM2
S phase	35/112	0.000113585	0.00850625	2.26917	20.6107	PSMD10;CDKN1B;PCNA;MCM7;MCM8;PRIM1;CKS1B;ORC5;PSMB6;ORC4;PSMB7;PSMB4;PSMD4;ORC3;ORC2;PSMB1;PSMF1;RFC5;RFC4;LIG1;RFC1;RPA2;POLA1;POLA2;PSMC5;PSMA4;PSMC3;CDK4;PSMC1;PSME1;MCM3;MCM4;MCM6;UBA52;MCM2
Activation of the pre-replicative complex	14/30	0.000133733	0.00921747	4.35666	38.86	MCM7;MCM8;PRIM1;RPA2;ORC5;ORC4;POLA1;POLA2;ORC3;ORC2;MCM3;MCM4;MCM6;MCM2
Messenger RNA processing	55/203	0.000136758	0.00921747	1.85845	16.5352	CELF2;SNRPD2;NUP62;DHX16;RBM17;SNRPN;PRMT2;NUP133;METTL3;CDC40;SRRM1;HNRNPUL1;NFX1;CD2BP2;SNRPE;SNRPF;DNAJC8;SNRNP200;SNRPA;SF3B5;SF3B2;SF3B3;RNMT;CSTF3;PRPF8;NXF1;NUP85;POLR2B;PCBP2;SPOP;POLR2F;NUP43;POLR2G;SNRPB2;POLR2I;HNRNPA0;SRPK2;SF3A3;SF3A2;RNGTT;CPSF1;CPSF3;NONO;CPSF2;UPF3B;GTF2H4;CLK4;CLK2;LSM2;LSM7;ERCC3;ERCC2;HNRNPD;SUGP1;NUP37
DNA replication pre-Initiation	29/88	0.00015251	0.00978969	2.45201	21.5489	PSMD10;CDKN1B;MCM7;MCM8;PRIM1;GMNN;ORC5;PSMB6;ORC4;PSMB7;PSMB4;PSMD4;ORC3;ORC2;PSMB1;PSMF1;RPA2;POLA1;POLA2;PSMC5;PSMA4;PSMC3;PSMC1;MCM3;PSME1;MCM4;MCM6;UBA52;MCM2
CDK regulation of DNA replication	10/18	0.000204973	0.0125593	6.21935	52.8186	ORC5;ORC4;CDKN1B;MCM7;ORC3;ORC2;MCM3;MCM4;MCM6;MCM2
Licensing factor removal from origins	22/61	0.000218806	0.012824	2.81154	23.6938	PSMD10;MCM7;GMNN;AZIN1;ORC5;PSMB6;ORC4;PSMB7;PSMB4;PSMC5;PSMA4;PSMD4;PSMC3;ORC3;PSMC1;PSMB1;MCM3;PSME1;MCM4;MCM6;PSMF1;MCM2
Nucleotide excision repair	21/58	0.000283686	0.0159337	2.8283	23.1006	RFC5;RFC4;PCNA;LIG1;RFC1;RPA2;XPC;GTF2H4;RBX1;DDB1;XAB2;ERCC3;POLR2B;ERCC1;ERCC2;POLR2F;POLR2G;ERCC5;ERCC6;POLR2I;CUL4B
G2/M checkpoints	17/43	0.000320122	0.017261	3.25649	26.2044	RFC5;RFC4;MCM7;MCM8;RPA2;ORC5;ORC4;CHEK2;ORC3;ORC2;MCM3;MCM4;ATM;RAD1;MCM6;MCM2;RAD9A
Spliceosome	37/127	0.000356679	0.0184924	2.05196	16.2899	SF3B5;RBM25;SF3B2;SF3B3;DDX46;DDX42;USP39;PRPF8;PQBP1;SNRPD2;DHX16;SNRPB2;CTNNBL1;SF3A3;RBM17;SF3A2;CCDC12;CWC15;PLRG1;CRNKL1;CDC40;LSM2;XAB2;LSM7;DDX39B;SYF2;PPIE;ACIN1;PPIH;SNRPE;PRPF31;SNRPF;SNRNP200;SNRPC;HNRNPA1L2;SNRPA;SRSF8
Capped intron-containing pre-mRNA processing	39/138	0.000492613	0.0245941	1.96637	14.9755	SF3B5;SF3B2;SF3B3;CSTF3;PRPF8;NXF1;SNRPD2;NUP85;POLR2B;PCBP2;NUP62;POLR2F;NUP43;POLR2G;SNRPB2;POLR2I;HNRNPA0;SF3A3;SF3A2;CPSF1;NUP133;CPSF3;METTL3;CPSF2;UPF3B;CDC40;SRRM1;LSM2;HNRNPUL1;NFX1;HNRNPD;CD2BP2;SNRPE;SNRPF;DNAJC8;SNRNP200;SNRPA;SUGP1;NUP37
RNA polymerase III transcription termination	11/23	0.000542642	0.0261243	4.56112	34.2954	NFIX;POLR3A;NFIA;POLR3B;POLR3GL;NFIB;POLR3C;POLR1D;POLR2F;POLR3H;POLR3K
Cell cycle	103/453	0.000566896	0.0263509	1.47514	11.0272	ZWILCH;GMNN;CCP110;CDC14A;PPP1CC;CDC23;PSMD4;PPP2R1A;PTTG2;CHEK2;KNTC1;MEN1;LIG1;CEP131;RBX1;ZW10;PSME1;ANAPC4;ANAPC5;UBA52;ANAPC1;PSMD10;TUBGCP2;ORC5;ORC4;DSN1;NUP85;ORC3;ORC2;CEP192;PSMF1;PLK4;ACD;SMAD4;UBE2I;POLA1;POLA2;RPS27;STAG2;CDK4;CDC16;TUBGCP6;ATM;RAD9A;CDKN1C;CEP57;LIN54;DIDO1;CDKN1B;MCM7;NUMA1;MCM8;CKS1B;PCM1;XPO1;MIS18BP1;SPDL1;NINL;RFC5;NUDC;RFC4;RFC1;NUP133;TUBB;PPP2R5D;CKAP5;RBL2;…
Deadenylation-dependent mRNA decay	18/49	0.000618996	0.0278135	2.89191	21.3637	EIF4A2;PARN;CNOT10;EDC3;LSM2;EXOSC7;CNOT6;LSM7;CNOT7;PAN3;XRN1;CNOT1;CNOT11;EXOSC8;DCP2;EIF4B;EXOSC1;DCP1B
RNA polymerase III transcription initiation from type 2 promoter	12/27	0.000699758	0.0304282	3.98109	28.9217	GTF3C2;GTF3C3;TBP;POLR3A;GTF3C5;POLR3B;POLR3GL;POLR3C;POLR1D;POLR2F;POLR3H;POLR3K
Pyrimidine metabolism	30/100	0.000727713	0.0306549	2.13718	15.4424	PRIM1;NUDT2;NT5C;NT5E;POLR2B;POLR2F;POLR2G;POLR2I;DUT;RRM1;POLR3GL;TXNRD2;CAD;ENTPD8;CTPS2;NME3;UCKL1;DCTD;POLA1;POLA2;UCK1;POLR3A;NME6;POLR3B;POLR3C;DPYD;POLR1D;POLR3H;POLR3K;ITPA
Translation factors	18/50	0.000817255	0.0333836	2.80137	19.9165	EIF4A2;EIF2B4;EEF2;GSPT2;EEF1B2;EEF1G;EEF2K;EIF2S3;EEF1D;EIF4EBP1;EIF3G;EIF4EBP2;EIF3H;EIF3E;EIF3F;EIF2B1;EIF3D;EIF4B
RNA polymerase III transcription initiation From type 3 promoter	12/28	0.00103907	0.041196	3.73205	25.637	BRF2;POU2F1;TBP;POLR3A;POLR3B;POLR3GL;POLR3C;SNAPC4;POLR1D;POLR2F;POLR3H;POLR3K
Transcription	47/181	0.00109508	0.0421761	1.75129	11.9384	GTF3C2;GTF3C3;NFIX;GTF3C5;RNMT;CSTF3;SUPT4H1;POLR2B;TAF1C;SNAPC4;UBTF;POLR2F;NELFB;POLR2G;NELFCD;POLR2I;SUPT16H;POU2F1;TBP;BRF2;RNGTT;CPSF1;POLR3GL;CPSF3;CPSF2;UPF3B;SSRP1;POLRMT;GTF2H4;CDC40;SRRM1;POLR3A;ERCC3;NFIA;POLR3B;NFX1;NFIB;POLR3C;ERCC2;POLR1D;SNRPE;POLR3H;TAF6;SNRPF;ERCC6;TAF4;POLR3K
Mitotic G1-G1/S phases	37/135	0.00125609	0.0470336	1.88354	12.5816	PSMD10;LIN54;CDKN1B;PCNA;MCM7;LIN37;MCM8;PRIM1;LIN9;CKS1B;ORC5;PSMB6;ORC4;PSMB7;PSMB4;PSMD4;PPP2R1A;ORC3;ORC2;PSMB1;PSMF1;CDKN2C;RPA2;RBL2;POLA1;POLA2;PSMC5;PSMA4;PSMC3;CDK4;PSMC1;PSME1;MCM3;MCM4;MCM6;UBA52;MCM2
Double-strand break repair	10/22	0.00158317	0.0576788	4.14524	26.7298	MDC1;XRCC6;RAD51;LIG1;XRCC5;TDP1;RPA2;ATM;NBN;BRCA2
Global genomic nucleotide excision repair (GG-NER)	13/33	0.00165678	0.0587721	3.23463	20.7109	RFC5;PCNA;RFC4;LIG1;RFC1;RPA2;XPC;GTF2H4;DDB1;ERCC3;ERCC1;ERCC2;ERCC5
HIV infection	50/200	0.00188131	0.0650259	1.66425	10.4444	PSIP1;XPO1;PSMD4;NUP62;AP1S1;NELFB;NELFCD;RAC1;SUPT16H;TBP;LIG1;NUP133;VPS37D;RBX1;PSMA4;PSME1;UBA52;VPS28;PSMD10;CUL5;RNMT;SUPT4H1;PSMB6;PSMB7;PSMB4;NUP85;POLR2B;PSMB1;AP2S1;POLR2F;FYN;NUP43;POLR2G;PSMF1;POLR2I;XRCC6;RNGTT;XRCC5;AP2B1;SSRP1;GTF2H4;PSMC5;PSMC3;ERCC3;PSMC1;ERCC2;NMT1;TAF6;TAF4;NUP37
DNA-PK pathway in nonhomologous end joining	8/16	0.0022284	0.0748096	4.9725	30.3645	XRCC6;DCLRE1C;POLM;XRCC5;CSNK2A2;CSNK2B;POLL;APTX
TOR signaling	13/34	0.00227537	0.0748096	3.08042	18.7462	PRKAA1;PRKAB2;PRKAG1;DDIT4L;PRKCA;TSC1;PRKAB1;RRAGA;RRAGB;EIF4EBP1;MLST8;ULK1;RAC1
RORA activates circadian expression	11/27	0.002727	0.0872601	3.42002	20.1937	NCOA1;SREBF1;HDAC3;SMARCD3;RXRA;CHD9;TBL1XR1;CARM1;RORA;PPARA;PPARGC1A
Huntington's disease	46/184	0.00278352	0.0872601	1.66344	9.78776	DNAH1;HDAC2;NDUFB8;NDUFB7;NDUFB10;DCTN2;NDUFB6;DCTN1;COX4I1;CLTA;COX7A2;UQCR11;UQCR10;COX5B;COX7C;UQCRH;SIN3A;POLR2B;AP2S1;POLR2F;POLR2G;CYC1;NDUFV3;NDUFV2;POLR2I;NDUFV1;PPARGC1A;COX8A;NDUFA9;TBP;NDUFA5;NDUFA4;SDHD;AP2B1;COX6C;GRIN1;NDUFS8;NDUFS7;SP1;NDUFS5;NDUFS4;UQCRC1;VDAC3;NDUFS3;TAF4;DNAL4
Skeletal muscle hypertrophy is regulated via AKT/mTOR pathway	9/20	0.0029539	0.0904968	4.0689	23.6998	EIF2S3;PDPK1;RPS6;INPPL1;EIF4EBP1;IGF1;PIK3R1;PDK2;IGF1R
Transcriptional regulation of white adipocyte differentiation	23/77	0.0030606	0.0916819	2.12157	12.2821	NCOA1;SREBF1;CEBPA;CDK19;HDAC3;SMARCD3;CHD9;EBF1;MED9;NR2F2;MED16;MED18;MED29;MED23;NCOR2;MED22;RXRA;MED30;TBL1XR1;CDK4;CARM1;PPARA;PPARGC1A
Dual incision reaction in TC-NER	11/28	0.0038192	0.109538	3.21865	17.9205	XAB2;ERCC3;POLR2B;ERCC1;ERCC2;POLR2F;POLR2G;ERCC5;ERCC6;POLR2I;GTF2H4
PKB-mediated events	11/28	0.0038192	0.109538	3.21865	17.9205	PRKAA1;PRKAB2;EEF2K;STRADA;RPS6;PRKAG1;EIF4EBP1;MLST8;TSC1;PRKAB1;EIF4B
Leading strand biosynthesis	7/14	0.00424517	0.119218	4.97132	27.1532	RFC5;POLA1;POLA2;PCNA;RFC4;RFC1;PRIM1
Androgen receptor signaling, proteolysis, and transcription regulation	25/88	0.00434014	0.119398	1.97674	10.7531	KDM1A;TGFB1I1;UBE3A;PIK3R2;PARK7;PIK3R1;EGFR;PRDX1;BMF;RAC1;PATZ1;NCOA1;PIAS4;SMARCE1;PIAS3;SMAD4;UBE2I;ETV5;PIAS1;NCOR2;SP1;CARM1;ZNF318;GAS6;RAD9A
Chromatin remodeling by nuclear receptors to facilitate initiation of transcription in carcinoma cells	5/8	0.00473026	0.12072	8.28257	44.343	NCOA1;NCOR2;HDAC3;RXRA;TBP
RNA polymerase II C-terminal domain phosphorylation and interaction with capping enzyme	5/8	0.00473026	0.12072	8.28257	44.343	RNGTT;ERCC3;RNMT;ERCC2;GTF2H4
ALK2 pathway	6/11	0.0047464	0.12072	5.96452	31.9124	ACVR1;SMAD4;AMHR2;TLX2;BMP7;SMAD5
Unwinding of DNA	6/11	0.0047464	0.12072	5.96452	31.9124	MCM7;MCM8;MCM3;MCM4;MCM6;MCM2
Oxidative phosphorylation	35/136	0.00513361	0.12582	1.72745	9.10704	NDUFB8;NDUFB7;NDUFA11;NDUFB10;NDUFB6;COX4I1;COX7A2;UQCR11;UQCR10;COX5B;COX7C;UQCRH;COX11;CYC1;NDUFV3;ATP6V1E1;NDUFV2;NDUFV1;ATP6V1C1;ATP6V0A1;COX8A;NDUFA9;ATP6V1G1;ATP6AP1;NDUFA5;NDUFA4;SDHD;COX6C;NDUFS8;PPA2;NDUFS7;NDUFS5;NDUFS4;UQCRC1;NDUFS3
Ubiquitin-mediated proteolysis	35/136	0.00513361	0.12582	1.72745	9.10704	DET1;CUL7;CUL5;UBA7;CUL3;CUL2;UBE2L6;UBE3A;KLHL13;RCHY1;HERC4;CDC23;HERC2;FBXO4;VHL;PIAS4;PIAS3;UBE2I;FBXW8;UBE2E3;SYVN1;UBE4B;PIAS1;RBX1;DDB1;KLHL9;ITCH;CDC16;ANAPC4;ANAPC5;BIRC6;SAE1;TRIM32;ANAPC1;CUL4B
RNA polymerase	11/29	0.00523379	0.125985	3.03965	15.9661	POLR3A;POLR3B;POLR2B;POLR3GL;POLR3C;POLR1D;POLR2F;POLR2G;POLR3H;POLR2I;POLR3K
HIV life cycle	31/118	0.00589667	0.139451	1.7756	9.11483	RNMT;SUPT4H1;PSIP1;XPO1;NUP85;POLR2B;NUP62;POLR2F;NELFB;NUP43;POLR2G;NELFCD;POLR2I;SUPT16H;XRCC6;TBP;RNGTT;LIG1;NUP133;XRCC5;VPS37D;SSRP1;GTF2H4;ERCC3;ERCC2;NMT1;TAF6;TAF4;UBA52;VPS28;NUP37
BRCA1, BRCA2 and ATR roles in cancer susceptibility	9/22	0.00636364	0.1479	3.4425	17.4092	RAD51;CHEK2;ATM;RAD1;NBN;BRCA2;FANCE;FANCG;RAD9A
Eukaryotic transcription initiation	14/42	0.00665939	0.150331	2.48772	12.4678	TBP;ILK;GTF2H4;ERCC3;POLR3B;POLR2B;ERCC2;POLR1D;POLR2F;POLR2G;POLR3H;TAF6;POLR2I;POLR3K
CARM1 and regulation of the estrogen receptor	10/26	0.00683436	0.150331	3.10818	15.4967	HDAC4;NCOR2;HDAC2;MEF2C;HDAC3;TBP;CARM1;PHB2;PPARGC1A;ESR1
Estrogen receptor transcription factor targets	10/26	0.00683436	0.150331	3.10818	15.4967	NCOA1;NCOR2;TAF6L;HDAC3;CTBP1;CARM1;DBT;PHB2;PPARGC1A;ESR1
Electron transport chain	28/105	0.00691434	0.150331	1.81151	9.01075	NDUFB8;NDUFB7;NDUFB10;NDUFB6;NDUFA12;COX4I1;COX7A2;UQCR11;UQCR10;COX5B;COX7C;UQCRH;COX11;NDUFV3;NDUFV2;NDUFV1;COX8A;NDUFA9;NDUFA5;NDUFA4;SDHD;COX6C;NDUFS8;NDUFS7;NDUFS5;NDUFS4;UQCRC1;NDUFS3
RNA polymerase II transcription	27/101	0.00762489	0.163148	1.81742	8.86233	RNMT;CSTF3;SUPT4H1;POLR2B;POLR2F;NELFB;POLR2G;NELFCD;POLR2I;SUPT16H;TBP;RNGTT;CPSF1;CPSF3;CPSF2;UPF3B;SSRP1;GTF2H4;CDC40;SRRM1;ERCC3;NFX1;ERCC2;SNRPE;TAF6;SNRPF;TAF4
Antigen presentation: folding, assembly, and peptide loading of class I MHC proteins	58/255	0.00807878	0.170159	1.46931	7.0799	DET1;UBE2L6;UBE3A;MRC2;TRIM9;NPEPPS;SEC61A1;CDC23;HERC2;PSMD4;SEC61G;FBXO4;FBXW8;UBE2E3;FBXO17;PJA2;RBX1;PSMA4;PSME1;ANAPC4;ANAPC5;UBA52;ANAPC1;PSMD10;CUL7;RNF34;CUL5;UBA7;CUL3;CUL2;ASB13;KLHL13;RCHY1;PSMB6;PSMB7;PSMB4;HECTD3;PSMB1;PSMF1;VHL;SEC31A;RNF25;KLHL9;SPSB2;ITCH;PSMC5;PSMC3;PSMC1;ASB8;CDC16;MKRN1;BLMH;SAE1;ASB3;SEC24C;TRIM32;RNF220;ASB1
Assembly of the ORC complex at the origin of replication	4/6	0.00889223	0.17876	9.93672	46.9269	ORC5;ORC4;ORC3;ORC2
PDGF genes and receptors	4/6	0.00889223	0.17876	9.93672	46.9269	PDGFRB;PDGFRA;PDGFD;PDGFB
Deadenylation of mRNA	9/23	0.00892226	0.17876	3.19641	15.0845	EIF4A2;CNOT6;CNOT7;PAN3;CNOT1;CNOT11;PARN;CNOT10;EIF4B
Parkinson's disease	33/131	0.00901756	0.17876	1.67789	7.9005	NDUFB8;NDUFB7;NDUFB10;UBA7;NDUFB6;COX4I1;HTRA2;UBE2L6;COX7A2;UQCR11;PARK7;UQCR10;COX5B;COX7C;UQCRH;CYC1;NDUFV3;NDUFV2;NDUFV1;SLC18A2;COX8A;NDUFA9;NDUFA5;NDUFA4;SDHD;COX6C;NDUFS8;NDUFS7;NDUFS5;NDUFS4;UQCRC1;VDAC3;NDUFS3
Androgen receptor proteolysis and transcription regulation	18/61	0.00942204	0.184071	2.08336	9.71826	PIAS4;VAV3;PIAS3;SVIL;KDM3A;XRCC6;UBE2I;KDM1A;XRCC5;TGFB1I1;UBE3A;PIAS1;CTDSP1;CTDSP2;PRDX1;CARM1;ZNF318;PATZ1
mTOR signaling pathway	29/113	0.0105897	0.203927	1.71965	7.82075	EIF4A2;PRKAA1;IRS1;POLDIP3;PIK3R2;PIK3R1;PLD1;EEF2K;RPS6KA2;EIF4EBP1;MLST8;RAC1;PPARGC1A;PDK2;EIF4B;SREBF1;PDPK1;STRADA;RPS6;PRKCA;TSC1;PPP2R5D;IGF1;EEF2;RRAGA;RRAGB;RPS6KB2;PDCD4;ULK1
Pyruvate metabolism and citric acid (TCA) cycle	13/40	0.0110534	0.20986	2.39501	10.7896	IDH3G;MDH2;ADHFE1;IDH2;PDHB;SDHD;CS;PDP1;PDPR;IDH3B;SUCLG2;D2HGDH;PDK2
Circadian rhythm	18/62	0.011243	0.210494	2.03589	9.13709	NCOA1;SREBF1;MEF2C;HDAC3;SMARCD3;CHD9;RORC;RORA;NR3C1;RBX1;DBP;RXRA;TBL1XR1;CARM1;PPARA;UBA52;MEF2D;PPARGC1A
Dual incision reaction in GG-NER	8/20	0.0116368	0.211978	3.31421	14.7601	DDB1;ERCC3;ERCC1;ERCC2;RPA2;XPC;ERCC5;GTF2H4
RNA polymerase III abortive and retractive initiation	8/20	0.0116368	0.211978	3.31421	14.7601	NFIX;POU2F1;POLR3A;NFIA;POLR3B;NFIB;POLR2F;POLR3H
Telomerase regulation	19/67	0.0121625	0.212013	1.97003	8.68663	HDAC2;ACD;XRCC6;CDKN1B;PARP2;XRCC5;UBE3A;NR2F2;ESR1;EGFR;SMG6;SIN3A;SP1;SP3;ATM;RAD1;NBN;RBBP7;RAD9A
RNA polymerase I, RNA polymerase III, and mitochondrial transcription	25/95	0.0122304	0.212013	1.77831	7.83138	GTF3C2;GTF3C3;NFIX;GTF3C5;TAF1C;SNAPC4;UBTF;POLR2F;TBP;BRF2;POU2F1;POLR3GL;POLRMT;GTF2H4;POLR3A;ERCC3;NFIA;POLR3B;NFIB;POLR3C;ERCC2;POLR1D;POLR3H;ERCC6;POLR3K
Autodegradation of Cdh1 by Cdh1-APC/C	17/58	0.0122621	0.212013	2.06323	9.08077	PSMD10;PSMB6;PSMB7;PSMB4;PSMC5;CDC23;PSMA4;PSMD4;PSMC3;PSMC1;PSMB1;CDC16;PSME1;ANAPC4;ANAPC5;PSMF1;ANAPC1
Endosomal sorting complex required for transport (ESCRT) pathway	10/28	0.0122678	0.212013	2.76249	12.1571	VPS4B;VTA1;CHMP2A;VPS37D;SNF8;CHMP6;VPS36;UBA52;VPS25;VPS28
mRNA stability regulation by proteins that bind AU-rich elements	23/86	0.0130186	0.22214	1.81751	7.89048	PSMD10;TNFSF13;PARN;PRKCA;EXOSC7;PSMB6;PSMB7;PSMB4;PSMC5;XPO1;PSMA4;PSMD4;XRN1;PSMC3;PSMC1;EXOSC8;PSMB1;PSME1;HNRNPD;PSMF1;UBA52;DCP2;EXOSC1
RNA degradation	17/59	0.0145996	0.246004	2.01398	8.51263	ZCCHC7;PARN;CNOT10;ENO2;EDC3;LSM2;EXOSC7;CNOT6;LSM7;EXOSC10;CNOT7;XRN1;CNOT1;EXOSC8;DCP2;EXOSC1;DCP1B
E2F-enabled inhibition of pre-replication complex formation	5/10	0.0158445	0.259368	4.96895	20.5959	ORC5;ORC4;MCM8;ORC3;ORC2
Rheb GTPase activity by AMPK regulation	5/10	0.0158445	0.259368	4.96895	20.5959	PRKAA1;PRKAB2;PRKAG1;TSC1;PRKAB1
BARD1 signaling events	10/29	0.01597	0.259368	2.61694	10.8264	XRCC6;PCNA;RAD51;XRCC5;EWSR1;ATM;NBN;TOPBP1;FANCE;FANCG
Messenger RNA splicing: minor pathway	13/42	0.0169372	0.271801	2.22957	9.09274	SF3B5;SF3B2;SF3B3;PRPF8;LSM2;SNRPD2;POLR2B;POLR2F;POLR2G;SNRPE;SNRPF;POLR2I;SNRNP200
TGF-beta regulation of extracellular matrix	114/565	0.0177356	0.275301	1.26347	5.09453	RPL5;CCNF;NUDT2;HNMT;LGALS3;FGF7;HMGN4;RPL18A;DPYSL2;ARL6IP5;TNFSF10;PDGFRA;FBXW8;NSMCE1;ZNF10;PDGFRL;PDIA5;OXA1L;RBP1;AGTR1;SKAP1;ABCG1;ZNF395;CRABP2;CUL5;GYPC;CTBP1;PDE1A;LPAR1;FBLN1;AEBP1;PIK3R1;MTMR4;FUT4;DPP4;C6;C7;GRK5;PDGFD;EIF4EBP1;SSR1;APOE;ZNF148;PCK2;B3GALNT1;ZNF142;JUP;BTN2A1;IDH2;NR2F2;IGF1;COL1A1;COL1A2;TNFSF4;ITGA11;OGN;CDC16;CDKN1C;MIPEP;SRPX;CITED2;CELF2;SUV39H1;SLC40A1;TNFAIP2;A…
Telomerase RNA component gene hTERC transcriptional regulation	4/7	0.0180039	0.275301	6.62408	26.61	NFYB;SP1;NFYC;SP3
Ubiquinone and other terpenoid-quinone biosynthesis	4/7	0.0180039	0.275301	6.62408	26.61	COQ3;COQ2;COQ7;COQ5
BMAL1-CLOCK/NPAS2 activates circadian expression	12/38	0.0181764	0.275301	2.29526	9.19857	NCOA1;HDAC3;SMARCD3;DBP;RXRA;CHD9;TBL1XR1;CARM1;RORA;NR3C1;PPARA;PPARGC1A
Signaling events mediated by HDAC class II	12/38	0.0181764	0.275301	2.29526	9.19857	HDAC4;NCOR2;MEF2C;HDAC3;XPO1;UBE2I;NUP62;RFXANK;GATA2;NR3C1;ANKRA2;ESR1
HIV-1 early elongation complex formation	6/14	0.0196016	0.287207	3.72715	14.6557	ERCC3;ERCC2;SUPT4H1;NELFB;NELFCD;GTF2H4
MAP kinase inactivation of SMRT corepressor	6/14	0.0196016	0.287207	3.72715	14.6557	NCOR2;MAP2K4;RXRA;THRA;RAC1;EGFR
Non-homologous end-joining (NHEJ) pathway	6/14	0.0196016	0.287207	3.72715	14.6557	XRCC6;DCLRE1C;POLM;XRCC5;TDP1;POLL
HIV genome transcription	17/61	0.0203025	0.294277	1.92221	7.49087	SUPT16H;TBP;RNGTT;RNMT;SUPT4H1;SSRP1;GTF2H4;ERCC3;POLR2B;ERCC2;POLR2F;NELFB;POLR2G;TAF6;NELFCD;POLR2I;TAF4
Mitochondrial protein import	15/52	0.0208059	0.298366	2.01659	7.80926	DNAJC19;IDH3G;TIMM22;HSCB;BCS1L;TOMM20;TOMM22;CS;COQ2;SAMM50;GRPEL2;LDHD;PMPCB;CYC1;TOMM6
Destabilization of mRNA by AUF1 (hnRNP D0)	18/66	0.0214616	0.304528	1.86578	7.16739	PSMD10;CUL5;RBX1;MRC2;PSMB6;PSMB7;PSMB4;PSMC5;PSMA4;PSMD4;PSMC3;CDK4;PSMC1;PSMB1;PSME1;HNRNPD;PSMF1;UBA52
G1 to S cell cycle control	18/67	0.0248775	0.345156	1.8276	6.75075	CDKN1C;CDKN1B;PCNA;CDKN2C;MCM7;PRIM1;RPA2;ORC5;ORC4;POLA2;CDK4;ORC3;ORC2;MCM3;MCM4;ATM;MCM6;MCM2
CDC6 association with the ORC-origin complex	5/11	0.025093	0.345156	4.14054	15.2586	ORC5;ORC4;MCM8;ORC3;ORC2
Mammalian target of rapamycin complex 1 (mTORC1)-mediated signaling	5/11	0.025093	0.345156	4.14054	15.2586	EEF2K;RPS6;EIF4EBP1;MLST8;EIF4B
EGFR downregulation	9/27	0.0272673	0.364258	2.4855	8.95294	SH3KBP1;AP2S1;CLTA;AP2B1;ARHGEF7;EPS15;UBA52;EGFR;EPN1
Association of licensing factors with the pre-replicative complex	6/15	0.0281243	0.364258	3.31282	11.8305	ORC5;ORC4;ORC3;GMNN;ORC2;UBA52
Lagging strand processive biosynthesis	6/15	0.0281243	0.364258	3.31282	11.8305	POLA1;POLA2;PCNA;LIG1;PRIM1;RPA2
Messenger RNA decay by 5' to 3' exoribonuclease	6/15	0.0281243	0.364258	3.31282	11.8305	LSM7;XRN1;DCP2;EDC3;LSM2;DCP1B
Spliceosomal assembly	6/15	0.0281243	0.364258	3.31282	11.8305	SNRPD2;SNRPB2;SNRPE;SNRPF;SNRPC;SNRPA
Mismatch repair	8/23	0.0284235	0.364258	2.65089	9.43859	RFC5;PCNA;RFC4;LIG1;RFC1;RPA2;SSBP1;MLH1
Signaling events mediated by the hedgehog family	8/23	0.0284235	0.364258	2.65089	9.43859	LRPAP1;STIL;SMO;BOC;GAS1;PIK3R1;DISP1;GLI2
PTEN-dependent cell cycle arrest and apoptosis	7/19	0.0288977	0.364258	2.89906	10.2743	CDKN1B;PDPK1;ILK;FASLG;PIK3R1;EGFR;PDK2
Diabetes pathways	32/137	0.0289136	0.364258	1.51748	5.3771	SNAP25;CUL7;DCTN1;CXXC1;PARN;ADD1;EXOSC7;EXOSC8;SSR1;CTSG;IGF2BP3;SEC11A;EXOSC1;SEC31A;KLHDC3;IGFBP5;IGFBP4;NFYB;MMP2;PLA2G4B;NFYC;SYVN1;IGF1;PDIA5;ARFGAP1;SPCS1;CTDSP2;CPE;GHRL;DCP2;VAMP2;EXOC1
Digestion of dietary carbohydrate	4/8	0.0312776	0.38681	4.96776	17.2126	AMY2A;AMY1A;AMY2B;AMY1B
S6K1 signaling	4/8	0.0312776	0.38681	4.96776	17.2126	EEF2K;RPS6;MLST8;EIF4B
Ubiquitin-mediated degradation of phosphorylated Cdc25A	17/64	0.0318525	0.390337	1.79919	6.20116	PSMD10;AZIN1;CKS1B;PSMB6;PSMB7;PSMB4;PSMC5;PSMA4;PSMD4;PSMC3;CHEK2;PSMC1;PSMB1;PSME1;ATM;PSMF1;UBA52
FOXM1 transcription factor network	12/41	0.0327548	0.39721	2.05745	7.03382	CDK4;SP1;CHEK2;MMP2;NFATC3;XRCC1;GAS1;BRCA2;ESR1;CENPB;ETV5;CKS1B
Purine metabolism	37/164	0.0330027	0.39721	1.4509	4.94925	PRPS2;PDE1B;NPR2;PDE1A;GMPR2;PRIM1;NUDT2;ADCY3;PAPSS1;NT5C;DGUOK;NT5E;GUK1;POLR2B;POLR2F;POLR2G;POLR2I;ADSL;RRM1;POLR3GL;ENTPD8;NME3;APRT;POLA1;POLA2;POLR3A;NME6;POLR3B;POLR3C;IMPDH2;POLR1D;PDE5A;POLR3H;PDE7B;PDE7A;POLR3K;ITPA
Extension of telomeres	9/28	0.0343723	0.406437	2.35454	7.936	RFC5;POLA1;POLA2;PCNA;RFC4;LIG1;RFC1;PRIM1;RPA2
Messenger RNA capping	9/28	0.0343723	0.406437	2.35454	7.936	RNGTT;ERCC3;RNMT;POLR2B;ERCC2;POLR2F;POLR2G;POLR2I;GTF2H4
ATM-mediated phosphorylation of repair proteins	3/5	0.0360751	0.412112	7.45031	24.7511	MDC1;ATM;NBN
Blockade of neurotransmitter release by botulinum toxin	3/5	0.0360751	0.412112	7.45031	24.7511	CHRNA1;SNAP25;VAMP2
Coenzyme A biosynthesis	3/5	0.0360751	0.412112	7.45031	24.7511	PANK2;PPCS;COASY
Phospholipase C delta-1 interactions in phospholipid-associated cell signaling	3/5	0.0360751	0.412112	7.45031	24.7511	PRKCA;ADRA1B;PLCD1
Peroxisomal lipid metabolism	7/20	0.0381921	0.428341	2.6759	8.73715	GNPAT;PHYH;AMACR;ACOX2;CROT;ABCD1;SLC27A2
Gap-filling DNA repair biosynthesis and ligation in global genomic nucleotide excision repair	6/16	0.0387667	0.428341	2.98136	9.69	RFC5;PCNA;RFC4;LIG1;RFC1;RPA2
SREBF and miR-33 in cholesterol and lipid homeostasis	6/16	0.0387667	0.428341	2.98136	9.69	ABCA1;SREBF1;PRKAA1;NR1H3;PPARA;PPARGC1A
Selenium metabolism and selenoproteins	6/16	0.0387667	0.428341	2.98136	9.69	SEPSECS;RPL30;SARS2;FBXO17;SP3;TRNAU1AP
E2F-mediated regulation of DNA replication	10/33	0.0392135	0.429755	2.1613	6.99988	ORC5;ORC4;POLA1;POLA2;PCNA;MCM8;PPP2R1A;PRIM1;ORC3;ORC2
Regulatory RNA pathways	8/25	0.0460813	0.500948	2.33874	7.19711	POLR2B;AGO1;POLR2F;POLR2G;POLR2I;TARBP2;TNRC6A;TNRC6B
Lipid metabolism regulation by peroxisome proliferator-activated receptor alpha (PPAR-alpha)	26/112	0.0484665	0.507691	1.50436	4.55352	SLC27A1;HDAC3;SMARCD3;CHD9;RORA;MED16;MED18;RXRA;MED30;SIN3A;PPARGC1A;ABCA1;NCOA1;SREBF1;CDK19;NFYB;NFYC;MED9;MED29;MED23;NCOR2;MED22;TBL1XR1;CARM1;RGL1;PPARA
Inhibition of matrix metalloproteinases	4/9	0.0489568	0.507691	3.97397	11.9887	MMP14;MMP2;TIMP2;RECK
Polyadenylation of mRNA	4/9	0.0489568	0.507691	3.97397	11.9887	CPSF1;CPSF3;CSTF3;CPSF2
APC/C-mediated degradation of cell cycle proteins	20/82	0.04918	0.507691	1.60458	4.83343	PSMD10;CDC14A;PSMB6;PSMB7;PSMB4;PSMC5;CDC23;PSMA4;PSMD4;PSMC3;PSMC1;PSMB1;CDC16;PSME1;ANAPC4;ANAPC5;BUB3;PSMF1;UBA52;ANAPC1
Inactivation of APC/C via direct inhibition of the APC/C complex	7/21	0.0492455	0.507691	2.48461	7.48101	CDC23;CDC16;ANAPC4;ANAPC5;BUB3;CDC14A;ANAPC1
Mitochondrial tRNA aminoacylation	7/21	0.0492455	0.507691	2.48461	7.48101	RARS2;SARS2;PPA2;IARS2;VARS2;HARS2;EARS2
Mitotic G2-G2/M phases	21/87	0.0493379	0.507691	1.58279	4.76273	CEP57;PLK4;DYNC1I2;NUMA1;DCTN2;DCTN1;TUBGCP2;TUBB;SSNA1;CEP131;DCTN3;CCP110;CKAP5;PCM1;XPO1;PPP2R1A;CENPJ;TUBGCP6;CEP192;NINL;PAFAH1B1
Tricarboxylic acid (TCA) cycle	11/39	0.0512648	0.519616	1.95289	5.80154	CS;PDP1;IDH3G;MDH2;IDH2;IDH3B;SUCLG2;PDHB;SDHD;PDK2;PCK2
Branched-chain amino acid catabolism	6/17	0.0516532	0.519616	2.71017	8.03077	ACAD8;BCKDHA;HIBADH;DBT;ACAT1;BCAT2
Energy-dependent regulation of mTOR by LKB1-AMPK	6/17	0.0516532	0.519616	2.71017	8.03077	PRKAA1;PRKAB2;STRADA;PRKAG1;TSC1;PRKAB1
CBL-mediated ligand-induced downregulation of EGF receptors	5/13	0.0522982	0.522208	3.10503	9.1623	PDGFRA;SH3GLB2;SH3KBP1;PRKCA;EGFR
Messenger RNA splicing: major pathway	17/68	0.0539622	0.534861	1.65768	4.83954	SF3B5;CPSF1;CSTF3;CPSF3;CPSF2;UPF3B;CDC40;SRRM1;HNRNPUL1;PCBP2;HNRNPD;CD2BP2;SNRPB2;DNAJC8;SNRPA;HNRNPA0;SUGP1
Peroxisome	19/78	0.0548157	0.536607	1.60167	4.6509	PEX16;PHYH;ECI2;PEX11B;IDH2;CROT;PEX1;DHRS4;GNPAT;HMGCL;PRDX5;AMACR;ACOX2;PRDX1;PXMP4;MPV17;ABCD1;SLC27A2;PAOX
HIF-1 degradation in normoxia	21/88	0.0549346	0.536607	1.55908	4.52384	PSMD10;SETD2;ARNT;SAT2;PSMB6;PSMB7;PSMB4;PSMC5;PSMA4;MTA1;PSMD4;PSMC3;APEX1;PSMC1;PSMB1;ID1;PSME1;PSMG3;PSMF1;VHL;PSMG2
Base excision repair	10/35	0.0568433	0.542164	1.98816	5.70096	PCNA;PARP4;LIG1;PARP2;OGG1;APEX1;XRCC1;POLL;HMGB1;MUTYH
MEF2D role in T cell apoptosis	10/35	0.0568433	0.542164	1.98816	5.70096	ZAP70;HDAC2;CD3G;FYN;PRKCA;CALM3;CD3D;MEF2D;LAT;CABIN1
ALK1 pathway	8/26	0.0571123	0.542164	2.20867	6.32285	ACVRL1;ACVR1;SMAD4;TLX2;CSNK2B;ID1;SMAD5;ACVR2A
RXR/VDR pathway	8/26	0.0571123	0.542164	2.20867	6.32285	ABCA1;NCOA1;NCOR2;SREBF1;RXRA;THRA;NR1H3;PPARA
Metabolism	294/1615	0.0587449	0.553764	1.11461	3.15942	PANK2;CMAS;CERK;ECI1;XYLT2;ACSM5;ENO2;LIPC;ATP6V1E1;SEPHS1;PDK2;EARS2;GAMT;CUBN;ATP6V1G1;ALG5;ALG3;MED9;PHKA2;CYP27A1;GNPAT;UQCRC1;SUCLG2;CYP2E1;ALDH7A1;PTGES;CDS1;CETP;LIPT1;ABCB1;SHMT2;PIK3R2;PLA2G5;PIK3R1;LIAS;MTMR4;INPP5B;HSD11B2;DGUOK;PPCS;NUP85;CHST12;RDH16;ST3GAL5;ST3GAL6;LTA4H;APOE;CHST14;ARSD;ATP6V1C1;DECR1;PCK2;ATP6V0A1;ABCA1;B3GALNT1;CDK19;CHKB;PMM1;CHKA;TGDS;ADHFE1;CS;POLA1;POLA2;UCK1…
Unfolded protein response	19/79	0.0612572	0.572294	1.57488	4.39813	KLHDC3;CUL7;DCTN1;NFYB;PLA2G4B;NFYC;CXXC1;PARN;SYVN1;ARFGAP1;PDIA5;ADD1;EXOSC7;CTDSP2;EXOSC8;SSR1;DCP2;EXOSC1;SEC31A
Fanconi anemia pathway	7/22	0.0621279	0.572294	2.31883	6.44302	USP1;ATM;BRCA2;FANCE;PALB2;UBA52;FANCG
DNA replication initiation	3/6	0.0632581	0.572294	4.96658	13.7104	POLA1;POLA2;PRIM1
Molybdenum cofactor biosynthesis	3/6	0.0632581	0.572294	4.96658	13.7104	MOCOS;MOCS1;GPHN
Multi-drug resistance factors	3/6	0.0632581	0.572294	4.96658	13.7104	ABCB1;GSTP1;ABCB11
Pyrimidine biosynthesis	3/6	0.0632581	0.572294	4.96658	13.7104	DCTD;DUT;CAD
EGF/EGFR signaling pathway	31/141	0.0641155	0.576184	1.40239	3.85247	SH3GL3;NDUFA13;RALA;PCNA;SH3KBP1;INPPL1;TWIST1;PIK3R2;PIK3R1;PLD1;EGFR;RPS6KA2;AP2S1;RAC1;EPS15;MAP3K4;MAP2K5;NCK1;MAP4K1;VAV3;PIAS3;PDPK1;PRKCA;AP2B1;DNM1;EPN1;ITCH;SP1;RASA1;ABI1;STAMBP
Lysosome	27/121	0.0686029	0.612428	1.429	3.8289	SCARB2;CD63;HEXB;CLTA;ABCB9;CLN5;AP3M2;GGA2;CTSO;GGA3;NAGLU;LAMP3;CTSK;AP1S1;CTSH;ACP2;CTSG;GUSB;ATP6V0A1;ATP6AP1;FUCA1;CTNS;AP4B1;PLA2G15;GALC;GNPTG;MAN2B1
Control of gene expression by vitamin D receptor	8/27	0.0696786	0.613786	2.0923	5.5736	NCOA1;SMARCE1;TOP2B;SUPT16H;RXRA;SMARCC2;CARM1;ACTL6A
DCC-mediated attractive signaling	5/14	0.070463	0.613786	2.75986	7.32099	TRIO;FYN;RAC1;DOCK1;NCK1
Retrograde neurotrophin signaling	5/14	0.070463	0.613786	2.75986	7.32099	AP2S1;CLTA;AP2B1;DNAL4;DNM1
Apoptotic DNA fragmentation and tissue homeostasis	4/10	0.0710317	0.613786	3.31144	8.75754	DFFB;TOP2B;HMGB2;HMGB1
Ethanol oxidation	4/10	0.0710317	0.613786	3.31144	8.75754	ACSS2;ADH1B;ADH1A;ACSS1
Endocytosis	42/201	0.0725091	0.618839	1.31493	3.45044	SH3GL3;RAB5B;SH3KBP1;VPS4B;ASAP3;CLTA;ARRB1;PLD1;RAB22A;EGFR;IGF1R;GRK5;PSD3;AP2S1;MVB12A;RAB11FIP2;VPS36;EPS15;PDGFRA;SH3GLB2;RAB4A;VTA1;VPS37D;IZUMO1R;SNF8;AP2B1;ARAP1;ARFGAP1;DNM1;EPN1;ARFGAP2;ITCH;ACAP2;DAB2;IL2RB;CHMP2A;STAMBP;CHMP6;FOLR2;VPS25;VPS28;RAB7A
Alzheimer's disease	36/169	0.0725346	0.618839	1.3471	3.53438	NDUFB8;NDUFB7;NDUFB10;NDUFB6;COX4I1;COX7A2;UQCR11;UQCR10;COX5B;COX7C;UQCRH;APH1A;PPP3R1;CHP1;CAPN1;APOE;CYC1;NAE1;NDUFV3;NDUFV2;NDUFV1;COX8A;NDUFA9;NDUFA5;NDUFA4;SDHD;COX6C;GRIN1;BACE1;NDUFS8;NDUFS7;NDUFS5;NDUFS4;UQCRC1;NDUFS3;CALM3
M phase pathway	22/96	0.0735676	0.623705	1.47863	3.85857	NUDC;NUP133;ZWILCH;PPP2R5D;CKAP5;NSL1;PPP1CC;DSN1;XPO1;RPS27;STAG2;PPP2R1A;INCENP;NUP85;ZW10;KNTC1;NUP43;SPDL1;BUB3;CENPQ;PAFAH1B1;NUP37
Mitochondrial pathway of apoptosis: BH3-only Bcl-2 family	22/97	0.0806947	0.679853	1.45883	3.672	HRK;SPHK2;CSNK2A2;PRKCA;ARHGAP24;PPP3R1;CTSO;CTSK;CAPN5;CSNK2B;NOXA1;RPS6KB2;VDAC3;NMT1;CAPN3;CASP2;CTSH;BMF;CTSG;CAPN1;CD47;RAD9A
Calcineurin in effects in keratinocyte differentiation	6/19	0.084367	0.691684	2.29294	5.66948	MARCKS;SP1;SP3;NFATC3;PRKCA;CALM3
ER-associated degradation (ERAD) pathway	6/19	0.084367	0.691684	2.29294	5.66948	SEC61A1;UBE2I;MAN1C1;MAN2B1;SAE1;RBX1
Resolution of abasic sites (AP sites)	6/19	0.084367	0.691684	2.29294	5.66948	PCNA;LIG1;OGG1;APEX1;XRCC1;MUTYH
Telomeres, telomerase, cellular aging, and immortality	6/19	0.084367	0.691684	2.29294	5.66948	XRCC6;XRCC5;PPP2R5D;PRKCA;EGFR;IGF1R
Pyruvate metabolism	13/52	0.0846646	0.691684	1.65689	4.09096	ACSS2;MDH2;AKR1B1;ACYP1;PDHB;ACAT1;PDP1;PDPR;LDHD;ACSS1;ALDH7A1;PDK2;PCK2
Glycoprotein VI-mediated activation cascade	9/33	0.0885686	0.697535	1.86345	4.51697	VAV3;COL1A1;COL1A2;PDPK1;PIK3R2;FYN;PIK3R1;RAC1;LAT
Negative regulators of RIG-I/MDA5 signaling	9/33	0.0885686	0.697535	1.86345	4.51697	RNF135;ITCH;UBA7;PCBP2;PIN1;UBE2L6;UBA52;ATG12;ATG5
Bile acid and bile salt biosynthesis via 7-alpha-hydroxycholesterol	5/15	0.0916324	0.697535	2.48373	5.93603	CYP27A1;AMACR;ACOX2;ABCB11;SLC27A2
HDL-mediated lipid transport	5/15	0.0916324	0.697535	2.48373	5.93603	ABCA1;CETP;CUBN;APOE;ABCG1
PRC2 complex long-term gene silencing through modification of histone tails	5/15	0.0916324	0.697535	2.48373	5.93603	HDAC2;PHC1;RING1;RBBP7;BMI1
Transport of mature mRNAs derived from intronless transcripts	10/38	0.0917907	0.697535	1.77482	4.23871	NXF1;XPO1;CPSF1;NUP133;NUP85;CPSF3;NUP62;CPSF2;NUP43;NUP37
Proteasome complex	7/24	0.0934812	0.697535	2.04578	4.84849	PSMB6;PSMB7;PSMB4;PSMA4;PSMD4;PSMB1;UBE3A
Degradation of beta-catenin by the destruction complex	17/73	0.094252	0.697535	1.50921	3.56444	AMER1;PSMD10;PPP2R5D;RBX1;PSMB6;PSMB7;PSMB4;PSMC5;PSMA4;PSMD4;PSMC3;PPP2R1A;PSMC1;PSMB1;PSME1;PSMF1;UBA52
Fatty acid, triacylglycerol, and ketone body metabolism	36/173	0.0948188	0.697535	1.30745	3.08008	SLC27A1;HDAC3;SMARCD3;CHD9;ECI1;RORA;MED16;MED18;ACAT1;HMGCL;MCEE;RXRA;MED30;SIN3A;HADH;PPARGC1A;DECR1;ABCA1;NCOA1;SREBF1;PRKAB2;CDK19;ELOVL4;NFYB;NFYC;MED9;ELOVL6;MED29;MED23;NCOR2;MED22;TBL1XR1;CARM1;GPD1L;RGL1;PPARA
Activation of chaperones by IRE1 alpha	12/48	0.095129	0.697535	1.65669	3.8974	KLHDC3;CUL7;DCTN1;PLA2G4B;CTDSP2;CXXC1;SYVN1;SSR1;ADD1;ARFGAP1;PDIA5;SEC31A
Energy metabolism	12/48	0.095129	0.697535	1.65669	3.8974	NCOA1;PRKAA1;PPP3R1;MEF2C;PRKAB2;RXRA;PRKAG1;TFB1M;PPARA;MEF2D;PPARGC1A;PRKAB1
Androgen receptor regulation of biosynthesis and transcription	13/53	0.0957375	0.697535	1.61537	3.78989	NCOA1;SMARCE1;MAP2K4;CEBPA;POU2F1;NR3C1;GATA2;RCHY1;NR2C1;SMARCA2;RXRA;APPBP2;CARM1
Creatine metabolism	3/7	0.0971987	0.697535	3.72471	8.68229	GAMT;GATM;CKB
FXR and LXR regulation of cholesterol metabolism	3/7	0.0971987	0.697535	3.72471	8.68229	ABCA1;RXRA;NR1H3
Homologous DNA pairing and strand exchange	3/7	0.0971987	0.697535	3.72471	8.68229	RAD51;RPA2;BRCA2
Phosphatidylglycerol biosynthesis	3/7	0.0971987	0.697535	3.72471	8.68229	PLD6;PLD1;PLD3
Post-transcriptional silencing by small RNAs	3/7	0.0971987	0.697535	3.72471	8.68229	AGO1;TNRC6A;TNRC6B
Terminal pathway of complement	3/7	0.0971987	0.697535	3.72471	8.68229	C5;C6;C7
Reversal of insulin resistance by leptin	4/11	0.0972824	0.697535	2.83821	6.61342	PRKAA1;PRKAB2;PRKAG1;PRKAB1
SUMOylation as a mechanism to modulate CtBP-dependent gene responses	4/11	0.0972824	0.697535	2.83821	6.61342	UBE2I;CTBP1;UBE3A;SAE1
TGF-beta signaling in gastrointestinal stem cells	4/11	0.0972824	0.697535	2.83821	6.61342	ACVRL1;SMAD4;SMAD5;SPTBN1
Valine, leucine and isoleucine biosynthesis	4/11	0.0972824	0.697535	2.83821	6.61342	IARS2;PDHB;VARS2;BCAT2
Vitamin B5 (pantothenate) metabolism	4/11	0.0972824	0.697535	2.83821	6.61342	PANK2;PPCS;AASDHPPT;COASY
T cell receptor calcium pathway	8/29	0.0994765	0.709494	1.89281	4.36828	PPP3R1;POU2F1;RCAN2;NFATC3;CHP1;FASLG;CALM3;CABIN1
Aurora B signaling	10/39	0.105765	0.746447	1.71352	3.84947	KLHL9;PPP1CC;INCENP;CUL3;RASA1;PPP2R5D;NCAPD2;KLHL13;SMC4;SMC2
HIV-1 transcription initiation	10/39	0.105765	0.746447	1.71352	3.84947	TBP;ERCC3;POLR2B;ERCC2;POLR2F;POLR2G;TAF6;POLR2I;TAF4;GTF2H4
C-Myb transcription factor network	19/85	0.110828	0.777633	1.43119	3.1483	PIAS3;CEBPA;CDKN1B;UBE2I;CLTA;YEATS4;GATA3;SMARCA2;MAF;COL1A2;CASP6;SIN3A;SP1;MYB;MCM4;TAB1;CD34;ZFPM1;ELANE
APC/C- and Cdc20-mediated degradation of Nek2A	7/25	0.111915	0.777633	1.93201	4.23114	CDC23;CDC16;ANAPC4;ANAPC5;BUB3;UBA52;ANAPC1
RNA polymerase I transcription initiation	7/25	0.111915	0.777633	1.93201	4.23114	ERCC3;TAF1C;ERCC2;UBTF;POLR1D;ERCC6;GTF2H4
Nuclear beta-catenin signaling and target gene transcription regulation	18/80	0.112759	0.77948	1.44326	3.14992	TCF7L2;HDAC2;TCF7L1;TRRAP;CTBP1;CHD8;MMP2;CTNNBIP1;CBY1;MITF;AXIN2;BCL9;XPO1;INCENP;TBL1XR1;SP5;TNIK;PITX2
Pantothenate and CoA biosynthesis	5/16	0.115662	0.795473	2.2578	4.87025	PANK2;PPCS;DPYD;COASY;BCAT2
Activation of matrix metalloproteinases	8/30	0.116678	0.798383	1.80666	3.88133	MMP11;MMP14;CMA1;MMP2;TIMP2;CTSG;TPSAB1;ELANE
HIV factor interactions with host	27/128	0.11781	0.80206	1.3294	2.84317	PSMD10;CUL5;PSIP1;PSMB6;PSMB7;PSMB4;XPO1;PSMD4;NUP85;NUP62;PSMB1;AP2S1;AP1S1;FYN;NUP43;PSMF1;RAC1;NUP133;AP2B1;RBX1;PSMC5;PSMA4;PSMC3;PSMC1;PSME1;UBA52;NUP37
Transport of mature transcript to cytoplasm	13/55	0.120408	0.81563	1.53826	3.2563	NUP133;CPSF1;CPSF3;CPSF2;UPF3B;CDC40;SRRM1;NXF1;NFX1;NUP85;NUP62;NUP43;NUP37
Non-coding RNA metabolism	12/50	0.121135	0.816452	1.56931	3.31257	SNRPD2;NUP133;NUP85;GEMIN2;CLNS1A;NUP62;GEMIN6;SNRPE;NUP43;SNRPF;SNUPN;NUP37
Assembly of HIV virion	4/12	0.127328	0.837259	2.48328	5.11802	NMT1;VPS37D;UBA52;VPS28
Granzyme A-mediated apoptosis pathway	4/12	0.127328	0.837259	2.48328	5.11802	DFFB;APEX1;GZMA;HMGB2
Inhibition of replication initiation of damaged DNA by RB1/E2F1	4/12	0.127328	0.837259	2.48328	5.11802	POLA1;POLA2;PPP2R1A;PRIM1
Pyruvate dehydrogenase (PDH) complex regulation	4/12	0.127328	0.837259	2.48328	5.11802	PDP1;PDPR;PDHB;PDK2
Resolution of AP sites via the single-nucleotide replacement pathway	4/12	0.127328	0.837259	2.48328	5.11802	APEX1;OGG1;XRCC1;MUTYH
Selenoamino acid metabolism	7/26	0.132105	0.859793	1.83022	3.70465	CBS;MAT2B;MAT1A;TRMT11;SEPHS1;LCMT1;PAPSS1
YAP1- and WWTR1 (TAZ)-stimulated gene expression	7/26	0.132105	0.859793	1.83022	3.70465	NCOA1;SMARCD3;RXRA;CHD9;TBL1XR1;CARM1;PPARA
SMAD2/3 nuclear pathway	18/82	0.134524	0.859793	1.39799	2.80438	NCOA1;PIAS4;PIAS3;MEF2C;HDAC2;SMAD4;CTBP1;GATA3;NR3C1;ESR1;KAT2A;COL1A2;SIN3A;CDK4;SP1;GSC;SP3;RBBP7
Beta-oxidation of pristanoyl-CoA	3/8	0.136751	0.859793	2.97959	5.92816	AMACR;ACOX2;CROT
Integration of provirus	3/8	0.136751	0.859793	2.97959	5.92816	XRCC6;XRCC5;PSIP1
Recruitment of repair and signaling proteins to double-strand breaks	3/8	0.136751	0.859793	2.97959	5.92816	MDC1;ATM;NBN
Recycling of eIF2-GDP complex	3/8	0.136751	0.859793	2.97959	5.92816	EIF2B4;EIF2S3;EIF2B1
Stabilization of mRNA by HuR	3/8	0.136751	0.859793	2.97959	5.92816	XPO1;TNFSF13;PRKCA
Vitamin D biosynthesis	3/8	0.136751	0.859793	2.97959	5.92816	CYP27A1;RXRA;CYP2R1
ERBB1 internalization pathway	10/41	0.137133	0.859793	1.60277	3.1844	SH3KBP1;LRIG1;PIK3R2;PIK3R1;STAMBP;ARHGEF7;EPS15;EGFR;DNM1;EPN1
Cyclin A-Cdk2-associated events at S phase entry	16/72	0.140264	0.864255	1.42001	2.78922	PSMD10;CDKN1B;CKS1B;PSMB6;PSMB7;PSMB4;PSMC5;PSMA4;PSMD4;PSMC3;CDK4;PSMC1;PSMB1;PSME1;PSMF1;UBA52
Chromatin remodeling by hSWI/SNF ATP-dependent complexes	5/17	0.142333	0.864255	2.06952	4.03472	SMARCE1;SMARCB1;SMARCC2;TBP;NR3C1
Destabilization of mRNA by KSRP	5/17	0.142333	0.864255	2.06952	4.03472	EXOSC7;EXOSC8;PARN;DCP2;EXOSC1
Endocytotic role of NDK, phosphins and dynamin	5/17	0.142333	0.864255	2.06952	4.03472	BIN1;CALM3;EPS15;DNM1;EPN1
HIV-1 elongation complex formation in the absence of HIV-1 Tat	5/17	0.142333	0.864255	2.06952	4.03472	SUPT16H;ERCC3;ERCC2;SSRP1;GTF2H4
Insulin-like growth factor (IGF) activity regulation by insulin-like growth factor binding proteins (IGFBPs)	5/17	0.142333	0.864255	2.06952	4.03472	IGFBP5;IGFBP4;MMP2;CTSG;IGF1
SUMOylation by RanBP2 regulates transcriptional repression	5/17	0.142333	0.864255	2.06952	4.03472	HDAC4;UBE2I;XPO1;NUP62;PIAS1
Apoptosis regulation	17/78	0.149702	0.903387	1.38509	2.63044	PSMD10;CDKN1B;DAPK2;PSMB6;PSMB7;PSMB4;PSMC5;PSMA4;PSMD4;PSMC3;CHEK2;PSMC1;PSMB1;PSME1;ATM;PSMF1;UBA52
RNA polymerase II promoter escape	6/22	0.150118	0.903387	1.86268	3.53226	TBP;ERCC3;ERCC2;TAF6;TAF4;GTF2H4
ABC transporters	11/47	0.152831	0.915628	1.51818	2.85178	ABCA1;ABCA10;ABCB1;ABCB10;ABCB7;ABCC5;ABCC9;ABCB9;ABCB11;ABCD1;ABCG1
eIF4E and p70 S6 kinase regulation	7/27	0.153954	0.918274	1.7386	3.2531	EIF4A2;IRS1;PDPK1;EIF4EBP1;PRKCA;PIK3R1;PDK2
AMPK signaling	15/68	0.156667	0.930342	1.40645	2.60704	SREBF1;CRTC2;PRKAB2;PRKAA1;STRADA;PRKAG1;TSC1;PIK3R2;PIK3R1;ADRA1B;EEF2;PRKAB1;EEF2K;RPS6KB2;EIF4EBP1
Advanced glycosylation endproduct receptor signaling	4/13	0.160674	0.937615	2.20723	4.03565	LGALS3;PRKCSH;HMGB1;DDOST
Ghrelin-mediated regulation of food intake and energy homeostasis	4/13	0.160674	0.937615	2.20723	4.03565	IGFBP5;IGFBP4;GHRL;IGF1
HIV life cycle early phase	4/13	0.160674	0.937615	2.20723	4.03565	XRCC6;LIG1;XRCC5;PSIP1
Lck and Fyn tyrosine kinases in initiation of T cell receptor activation	4/13	0.160674	0.937615	2.20723	4.03565	ZAP70;CD3G;FYN;CD3D
Signaling by PDGF	25/122	0.162537	0.944399	1.28123	2.32779	CDKN1B;PDE1B;PDE1A;PDGFB;ADCY3;PIK3R2;PIK3R1;THBS2;THBS3;PDGFD;MLST8;NCK1;PDGFRB;PDGFRA;PDPK1;PRKCA;COL1A1;COL3A1;COL1A2;COL5A1;COL6A2;RASA1;COL6A1;RPS6KB2;COL6A3
Membrane trafficking	27/133	0.163759	0.947415	1.26631	2.29121	VPS4B;CLTA;ARRB1;SNX2;BLOC1S1;AP1S1;VPS36;SNX5;SEC31A;TBC1D8B;VTA1;VPS37D;SNF8;PUM1;AP4B1;ARFGAP1;COPZ1;DNM1;DAB2;CHMP2A;CHMP6;UBA52;VPS25;SEC24C;VPS28;COPE;VAMP2
N-glycan biosynthesis	11/48	0.169986	0.979234	1.47706	2.61741	FUT8;DPM3;DAD1;ALG5;MGAT4B;MAN1C1;STT3A;ALG3;DOLK;MAN1B1;DDOST
Activated AMPK stimulation of fatty-acid oxidation in muscle	5/18	0.171364	0.982976	1.91021	3.36955	PRKAA1;PRKAB2;STRADA;PRKAG1;PRKAB1
Cleavage of growing transcript in the termination region	10/43	0.172817	0.985181	1.50546	2.64286	CPSF1;NFX1;CSTF3;CPSF3;CPSF2;UPF3B;SNRPE;SNRPF;CDC40;SRRM1
Rho GTPase cycle	25/123	0.173211	0.985181	1.26808	2.22325	TRIO;FAM13B;FAM13A;GDI2;ARHGAP19;ARHGAP1;PIK3R2;FGD1;ARHGAP12;INPP5B;SYDE1;RHOT2;RHOT1;SRGAP3;RAC1;VAV3;ARHGEF18;ARHGAP28;ARAP1;MYO9A;ARHGAP24;ARHGAP32;ARHGEF9;DEPDC7;ARHGEF7
Nuclear receptors	9/38	0.175186	0.992231	1.5417	2.6855	RXRA;THRA;RORC;NR1H3;RORA;NR2F2;NR3C1;PPARA;ESR1
Post-elongation processing of intronless pre-mRNA	6/23	0.175969	0.992493	1.753	3.04576	CPSF1;CPSF3;CSTF3;CPSF2;SNRPE;SNRPF
PERK-regulated gene expression	7/28	0.177338	0.993936	1.65571	2.86388	EXOSC7;NFYB;NFYC;EXOSC8;PARN;EXOSC1;DCP2
Activation of pro-caspase 8	3/9	0.180649	0.993936	2.48284	4.24864	TNFSF10;FASLG;TRAF2
HIV-induced T cell apoptosis	3/9	0.180649	0.993936	2.48284	4.24864	CD3G;FASLG;CD3D
Heme biosynthesis	3/9	0.180649	0.993936	2.48284	4.24864	FECH;UROD;PPOX
PPAR-gamma coactivator role in obesity and thermogenesis	3/9	0.180649	0.993936	2.48284	4.24864	NCOA1;RXRA;PPARGC1A
Tat-mediated elongation of the HIV-1 transcript	3/9	0.180649	0.993936	2.48284	4.24864	ERCC3;ERCC2;GTF2H4
Hedgehog signaling pathway	15/70	0.185802	0.999995	1.35514	2.2808	WNT5B;IFT172;BMP7;GLI3;GLI2;DISP1;IFT88;SMO;SIN3A;STK36;RAB23;BOC;GAS1;SOX9;CSNK1G1
Nucleotide metabolism	15/70	0.185802	0.999995	1.35514	2.2808	ADSL;DUT;RRM1;GMPR2;CAD;CTPS2;APRT;DCTD;NT5C;DGUOK;NT5E;UCK1;GUK1;IMPDH2;DPYD
HNF3A pathway	10/44	0.192143	0.999995	1.46109	2.41009	CDKN1B;POU2F1;SFTPA2;NFIA;NFIB;SP1;NDUFV3;NR2F2;SFTPA1;ESR1
Valine, leucine and isoleucine degradation	10/44	0.192143	0.999995	1.46109	2.41009	ACAD8;BCKDHA;HMGCL;MCEE;HIBADH;DBT;HADH;ALDH7A1;ACAT1;BCAT2
Signaling events regulated by Ret tyrosine kinase	9/39	0.196013	0.999995	1.49022	2.42843	DOK4;IRS1;RASA1;GFRA1;PRKCA;PIK3R1;RAC1;PDLIM7;NCK1
Intronless pre-mRNA processing	4/14	0.196759	0.999995	1.98639	3.22942	CPSF1;CPSF3;CSTF3;CPSF2
Osteoblast signaling	4/14	0.196759	0.999995	1.98639	3.22942	PDGFRB;COL1A1;PDGFRA;PDGFB
Porphyrin metabolism	4/14	0.196759	0.999995	1.98639	3.22942	FECH;UROD;PPOX;BLVRA
T cell receptor/JNK pathway	4/14	0.196759	0.999995	1.98639	3.22942	MAP4K1;MAP2K4;DBNL;LAT
Viral messenger RNA biosynthesis	4/14	0.196759	0.999995	1.98639	3.22942	POLR2B;POLR2F;POLR2G;POLR2I
2-LTR circle formation	2/5	0.198224	0.999995	3.31006	5.35686	XRCC6;XRCC5
Abacavir metabolism	2/5	0.198224	0.999995	3.31006	5.35686	GUK1;ADH1A
Catalytic cycle of mammalian FMOs	2/5	0.198224	0.999995	3.31006	5.35686	FMO1;FMO4
Folate-alcohol and cancer pathway	2/5	0.198224	0.999995	3.31006	5.35686	CBS;CYP2E1
Ketone body metabolism	2/5	0.198224	0.999995	3.31006	5.35686	HMGCL;ACAT1
HIF-2-alpha transcription factor network	8/34	0.199442	0.999995	1.52835	2.46405	MMP14;CITED2;SP1;APEX1;TWIST1;ARNT;EIF3E;VHL
Homologous recombination	7/29	0.202113	0.999995	1.58036	2.52688	TOP3B;RAD51;RPA2;ATM;NBN;SSBP1;BRCA2
Matrix metalloproteinases	7/29	0.202113	0.999995	1.58036	2.52688	MMP11;MMP14;MMP27;MMP2;MMP23B;TIMP2;TCF20
Skeletal myogenesis control by HDAC and calcium/calmodulin-dependent kinase (CaMK)	7/29	0.202113	0.999995	1.58036	2.52688	MEF2C;CALM3;PIK3R1;IGF1;MEF2D;CABIN1;IGF1R
Destabilization of mRNA by butyrate response factor 1 (BRF1)	5/19	0.202435	0.999995	1.77366	2.83314	EXOSC7;XRN1;EXOSC8;DCP2;EXOSC1
IGF-1 receptor and longevity	5/19	0.202435	0.999995	1.77366	2.83314	IRS1;PDPK1;IGF1;PIK3R1;IGF1R
Mitochondrial gene expression	5/19	0.202435	0.999995	1.77366	2.83314	SP1;POLRMT;TFB1M;PPARGC1A;HCFC1
Protein export	6/24	0.203465	0.999995	1.65552	2.63602	OXA1L;SEC61A1;SPCS1;SEC61G;SEC11A;SRP9
Sulfur amino acid metabolism	6/24	0.203465	0.999995	1.65552	2.63602	CBS;MRI1;MAT1A;MAT2B;SUOX;ENOPH1
Thyroid-stimulating hormone signaling pathway	14/66	0.207251	0.999995	1.33761	2.10516	CDKN1B;PDPK1;RPS6;ADCY3;PIK3R2;PIK3R1;PLD1;IGF1R;GNAI2;MYL12B;RBL2;PAX8;CDK4;APEX1
Signal transduction by L1	8/35	0.22314	0.999995	1.47165	2.20741	RPS6KA2;CSNK2A2;CSNK2B;AP2S1;CLTA;RAC1;AP2B1;EGFR
Adipogenesis	26/133	0.22492	0.999995	1.20758	1.80172	CEBPA;IRS1;ASIP;TWIST1;RORA;GATA3;NR3C1;GATA2;RXRA;NDN;PPARGC1A;MEF2D;PCK2;NCOA1;SREBF1;MEF2C;PTGIS;WNT5B;EBF1;NR1H3;IGF1;BSCL2;NCOR2;RBL2;SP1;PPARA
Abacavir transport and metabolism	3/10	0.227627	0.999995	2.12802	3.14957	ABCB1;GUK1;ADH1A
Bile acid and bile salt biosynthesis via 24-hydroxycholesterol	3/10	0.227627	0.999995	2.12802	3.14957	CYP27A1;AMACR;SLC27A2
Bile acids and bile salt biosynthesis	3/10	0.227627	0.999995	2.12802	3.14957	CYP27A1;AMACR;SLC27A2
COPI-mediated vesicle transport	3/10	0.227627	0.999995	2.12802	3.14957	ARFGAP1;COPE;COPZ1
Dermatan sulfate biosynthesis	3/10	0.227627	0.999995	2.12802	3.14957	UST;CHST14;DCN
Fanconi anemia pathway regulation	3/10	0.227627	0.999995	2.12802	3.14957	USP1;ATM;UBA52
Gap junction degradation	3/10	0.227627	0.999995	2.12802	3.14957	DAB2;CLTA;DNM1
Phospholipase C signaling pathway	3/10	0.227627	0.999995	2.12802	3.14957	PDPK1;PRKCA;PIK3R1
Ghrelin pathway	6/25	0.232375	0.999995	1.56829	2.28877	ABCA1;SREBF1;NR1H3;ABCG1;ACAT1;ATG5
ATR activation in response to replication stress	4/15	0.234987	0.999995	1.8057	2.61506	RFC5;RFC4;RPA2;RAD1
BMP signaling pathway in stem cells	4/15	0.234987	0.999995	1.8057	2.61506	ACVR1;SMAD4;SMAD5;ACVR2A
Interleukin-17 signaling pathway	4/15	0.234987	0.999995	1.8057	2.61506	CD2;CD3G;CD3D;CD34
Mechanism of gene regulation by peroxisome proliferators via PPAR-alpha	12/57	0.238925	0.999995	1.32464	1.89636	NCOA1;NCOR2;DUT;RXRA;CITED2;SP1;NR1H3;PRKCA;PIK3R1;PPARA;PPARGC1A;MRPL11
Antigen processing: cross presentation	16/79	0.242813	0.999995	1.2617	1.78589	PSMD10;MRC2;PSMB6;SEC61A1;PSMB7;PSMB4;PSMC5;PSMA4;PSMD4;PSMC3;SEC61G;PSMC1;PSMB1;PSME1;PSMF1;UBA52
SNARE interactions in vesicular transport	8/36	0.247798	0.999995	1.41901	1.97972	SNAP25;SNAP47;STX19;STX18;VAMP1;BET1L;VAMP2;BET1
E2F transcription factor network	15/74	0.251037	0.999995	1.26296	1.74561	CEBPA;RRM1;CDKN1B;CDKN2C;TRRAP;XRCC1;SMARCA2;UXT;RBL2;POLA1;KAT2A;SP1;MCM3;ATM;TOPBP1
Integrins in angiogenesis	15/74	0.251037	0.999995	1.26296	1.74561	VAV3;CDKN1B;COL13A1;IRS1;ILK;PIK3R1;IGF1R;COL1A1;COL3A1;COL1A2;COL5A1;COL6A2;COL6A1;COL6A3;RAC1
Prostaglandin biosynthesis and regulation	7/31	0.255169	0.999995	1.44849	1.97838	PTGFR;HSD11B2;EDNRA;PTGIS;HPGD;PTGS1;PTGDR
LKB1 signaling events	10/47	0.25519	0.999995	1.34238	1.83335	CRTC2;PRKAA1;SMAD4;SMARCD3;STRADA;PRKAG1;MLST8;TSC1;ESR1;PRKAB1
TGF-beta signaling in development	6/26	0.262456	0.999995	1.48978	1.99284	ACVRL1;ACVR1;SMAD4;SMAD5;SPTBN1;ACVR2A
Urokinase-type plasminogen activator (uPA) and uPAR-mediated signaling	9/42	0.263987	0.999995	1.3545	1.80401	PDGFRB;PDGFD;FGG;KLK4;CTSG;RAC1;DOCK1;EGFR;ELANE
Basic mechanisms of SUMOylation	2/6	0.265707	0.999995	2.4824	3.29007	UBE2I;SAE1
Cell cycle negative regulation by p75 neurotrophin receptor	2/6	0.265707	0.999995	2.4824	3.29007	HDAC2;HDAC3
Methionine salvage pathway	2/6	0.265707	0.999995	2.4824	3.29007	MRI1;ENOPH1
Mitochondrial beta-oxidation of unsaturated fatty acids	2/6	0.265707	0.999995	2.4824	3.29007	ECI1;DECR1
Pregnenolone biosynthesis	2/6	0.265707	0.999995	2.4824	3.29007	STARD5;AKR1B1
RSK activation	2/6	0.265707	0.999995	2.4824	3.29007	PDPK1;RPS6KA2
Signaling by EGFR	2/6	0.265707	0.999995	2.4824	3.29007	LRIG1;EGFR
Small interfering RNA (siRNA) biogenesis	2/6	0.265707	0.999995	2.4824	3.29007	AGO1;TARBP2
eIF4E release	2/6	0.265707	0.999995	2.4824	3.29007	EIF4EBP1;MLST8
Validated nuclear estrogen receptor alpha network	13/64	0.268961	0.999995	1.26612	1.66265	DDX17;NCOA1;HDAC4;SMAD4;PCNA;AXIN2;PHB2;ESR1;NCOR2;MTA1;HSF2;NDUFV3;EBAG9
APC/C activator regulation between G1/S and early anaphase	5/21	0.26928	0.999995	1.55177	2.03593	CDC23;CDC16;ANAPC4;ANAPC5;ANAPC1
CD28-dependent PI3K/Akt signaling	5/21	0.26928	0.999995	1.55177	2.03593	PDPK1;MLST8;PIK3R2;FYN;PIK3R1
ChREBP regulation by carbohydrates and cAMP	5/21	0.26928	0.999995	1.55177	2.03593	PRKAA1;PRKAB2;PRKAG1;PPP2R5D;PRKAB1
E-cadherin keratinocyte pathway	5/21	0.26928	0.999995	1.55177	2.03593	JUP;FYN;PIK3R1;RAC1;EGFR
IGF1 signaling pathway	5/21	0.26928	0.999995	1.55177	2.03593	IRS1;RASA1;IGF1;PIK3R1;IGF1R
Ghrelin biosynthesis, secretion, and deacylation	4/16	0.274762	0.999995	1.65512	2.13817	SPCS1;GHRL;IGF1;SEC11A
Glyoxylate and dicarboxylate metabolism	4/16	0.274762	0.999995	1.65512	2.13817	CS;MDH2;GLYCTK;HYI
Inhibitor of DNA binding (ID) signaling pathway	4/16	0.274762	0.999995	1.65512	2.13817	RBL2;SREBF1;PAX8;ID1
N-glycan precursor substrate biosynthesis	4/16	0.274762	0.999995	1.65512	2.13817	DPM3;PMM1;ALG5;DOLK
PI3K subunit p85 role in regulation of actin organization and cell migration	4/16	0.274762	0.999995	1.65512	2.13817	PDGFRA;ARPC1A;PIK3R1;RAC1
Riboflavin metabolism	4/16	0.274762	0.999995	1.65512	2.13817	ACP6;ACP2;PHPT1;ACP1
Sonic Hedgehog (Shh) pathway	4/16	0.274762	0.999995	1.65512	2.13817	SMO;DYRK1B;GLI3;GLI2
Alternative complement pathway	3/11	0.276507	0.999995	1.86191	2.39352	C5;C6;C7
Gamma-carboxylation, transport, and amino-terminal cleavage of proteins	3/11	0.276507	0.999995	1.86191	2.39352	VKORC1;F10;GAS6
Messenger RNA decay by 3' to 5' exoribonuclease	3/11	0.276507	0.999995	1.86191	2.39352	EXOSC7;EXOSC8;EXOSC1
Methylation	3/11	0.276507	0.999995	1.86191	2.39352	MAT1A;MAT2B;HNMT
Norepinephrine neurotransmitter release cycle	3/11	0.276507	0.999995	1.86191	2.39352	SNAP25;SLC18A2;VAMP2
Recruitment of NuMA to mitotic centrosomes	3/11	0.276507	0.999995	1.86191	2.39352	NUMA1;TUBGCP2;TUBGCP6
Telomerase protein component gene hTERT transcriptional regulation	3/11	0.276507	0.999995	1.86191	2.39352	SP1;SP3;ESR1
Post-translational regulation of adherens junction stability and disassembly	10/48	0.277612	0.999995	1.30698	1.67493	JUP;CABLES1;FYN;GFRA1;RAC1;ZBTB33;RIN2;EGFR;IGF1R;RAB7A
Signaling by insulin receptor	21/109	0.277698	0.999995	1.18552	1.51891	KL;ATP6V1G1;PRKAB2;PRKAA1;IRS1;PDPK1;STRADA;RPS6;PRKAG1;TSC1;PIK3R2;PIK3R1;PRKAB1;FGF7;EEF2K;EIF4EBP1;MLST8;ATP6V1E1;ATP6V1C1;EIF4B;ATP6V0A1
MicroRNA regulation of DNA damage response	14/70	0.278217	0.999995	1.24177	1.58866	CDKN1B;MCM7;RFC1;RPA2;PIDD1;RAD51;CDK4;CHEK2;CCNG1;TLK1;ATM;RAD1;NBN;RAD9A
Signaling events mediated by HDAC class I	14/70	0.278217	0.999995	1.24177	1.58866	HDAC4;HDAC2;HDAC3;UBE2I;SIRT4;SIRT5;GATA2;NR2C1;NCOR2;XPO1;SIN3A;NUP62;RBBP7;ZFPM1
Glycine, serine and threonine metabolism	7/32	0.283095	0.999995	1.39046	1.75473	GAMT;GATM;SHMT2;CBS;GLYCTK;AMT;ALDH7A1
Mitotic prometaphase	9/43	0.28812	0.999995	1.31459	1.63584	PPP1CC;NUDC;XPO1;RPS27;STAG2;INCENP;SPDL1;CKAP5;PAFAH1B1
CTCF pathway	6/27	0.293457	0.999995	1.41876	1.73943	TGFBR3;SMAD4;CDKN1B;PPP2R5D;PIK3R1;SMAD5
VEGFR1 pathway	6/27	0.293457	0.999995	1.41876	1.73943	PDPK1;RASA1;PRKCA;CALM3;PIK3R1;NCK1
RAC1 activity regulation	8/38	0.299435	0.999995	1.32425	1.59686	VAV3;TRIO;ARHGEF25;ABI1;ARHGAP1;RAC1;ARHGEF7;DOCK1
Nephrin interactions	5/22	0.304328	0.999995	1.4604	1.73737	PIK3R2;FYN;PIK3R1;SPTBN1;NCK1
Smooth muscle contraction	5/22	0.304328	0.999995	1.4604	1.73737	ACTA2;TPM1;MYL6B;SORBS3;MYL12B
Mitochondrial pathway of apoptosis: caspases	15/77	0.304872	0.999995	1.20163	1.42738	DIABLO;CAD;AIP;TRAF2;COMMD1;GSPT2;UACA;CASP6;CAPN5;CAPN3;ACIN1;BIRC6;CAPN1;CYC1;TAB1
Wnt signaling pathway	42/231	0.30728	0.999995	1.1042	1.30295	CTBP1;TSHZ1;CHD8;TSHZ2;CBY1;ARRB1;PRICKLE1;PPP3R1;PPP2R1A;SOX18;SOX15;DVL2;DACT2;CHP1;SOX9;RAC1;SOX4;ANKRD6;TCF7L2;SMAD4;TCF7L1;FZD2;TBP;WNT5B;CSNK2A2;CTNNBIP1;NFATC3;PRKCA;RPSA;TSC1;PPP2R5D;AXIN2;RBX1;VANGL1;BCL9;VANGL2;TBL1XR1;CSNK2B;PIN1;TAB1;PAFAH1B1;CSNK1G1
Retinoblastoma protein regulation	13/66	0.3084	0.999995	1.21819	1.43303	CEBPA;MEF2C;CDKN1B;SMARCB1;TBP;HDAC3;CTBP1;SUV39H1;MITF;MYL1;CDK4;GSC;UBTF
Lysine degradation	9/44	0.3128	0.999995	1.27695	1.48406	SETD2;SETDB1;SUV39H1;NSD1;SETDB2;HADH;COLGALT1;ALDH7A1;ACAT1
NCAM1 interactions	9/44	0.3128	0.999995	1.27695	1.48406	COL1A1;COL3A1;COL1A2;COL5A1;COL6A2;COL6A1;COL6A3;GFRA1;GFRA2
ACE inhibitor pathway	4/17	0.315509	0.999995	1.52772	1.76232	CMA1;AGTR1;CTSG;NR3C2
Eukaryotic protein translation	4/17	0.315509	0.999995	1.52772	1.76232	EIF4A2;EEF2K;EIF2S3;EEF2
Renin-angiotensin system	4/17	0.315509	0.999995	1.52772	1.76232	CPA3;CMA1;AGTR1;CTSG
Synaptic proteins at the synaptic junction	4/17	0.315509	0.999995	1.52772	1.76232	GUK1;ADD1;SPTBN1;GRIN1
Syndecan 3 pathway	4/17	0.315509	0.999995	1.52772	1.76232	APH1A;FYN;PTN;EGFR
Nitric oxide stimulation of guanylate cyclase	6/28	0.325125	0.999995	1.35419	1.52149	PDE1B;PDE1A;KCNMA1;KCNMB4;PRKG2;PDE5A
PTM: gamma carboxylation, hypusine formation and arylsulfatase activation	6/28	0.325125	0.999995	1.35419	1.52149	VKORC1;F10;DHPS;ARSD;GAS6;SUMF2
Recycling pathway of cell adhesion molecule L1	6/28	0.325125	0.999995	1.35419	1.52149	DPYSL2;RPS6KA2;AP2S1;CLTA;AP2B1;DNM1
Angiotensin II-mediated activation of JNK pathway via Pyk2-dependent signaling	8/39	0.326124	0.999995	1.28145	1.43584	MAP2K4;MEF2C;AGTR1;PRKCA;CALM3;RAC1;MEF2D;EGFR
E-cadherin nascent AJ-like junctions pathway	8/39	0.326124	0.999995	1.28145	1.43584	ENAH;JUP;CSNK2A2;ABI1;CSNK2B;PIK3R1;RAC1;WASF2
Beta-arrestins in GPCR desensitization	3/12	0.326233	0.999995	1.65493	1.85376	ARRB1;PPARA;DNM1
Caspase-mediated cleavage of cytoskeletal proteins	3/12	0.326233	0.999995	1.65493	1.85376	DBNL;CASP6;ADD1
Dopamine neurotransmitter release cycle	3/12	0.326233	0.999995	1.65493	1.85376	SNAP25;SLC18A2;VAMP2
Gamma-aminobutyric acid receptor life cycle	3/12	0.326233	0.999995	1.65493	1.85376	DNM1;GABARAP;GPHN
Nucleotide G-protein coupled receptors (GPCRs)	3/12	0.326233	0.999995	1.65493	1.85376	P2RY6;ADORA3;LPAR4
Phosphatidylethanolamine biosynthesis	3/12	0.326233	0.999995	1.65493	1.85376	CHKB;CHKA;CEPT1
Pyrimidine catabolism	3/12	0.326233	0.999995	1.65493	1.85376	NT5C;NT5E;DPYD
Toll-like receptor endosomal trafficking and processing	3/12	0.326233	0.999995	1.65493	1.85376	UNC93B1;CTSK;TLR7
Prolactin regulation of apoptosis	22/118	0.328186	0.999995	1.13827	1.26823	SRRM2;SMARCE1;DCTN3;VPS37D;BHLHA15;IGF1;N4BP2L2;UQCRH;RBX1;MYL12B;TM9SF2;OXA1L;MRPL40;PSMA4;MYB;UBTD1;ZSCAN26;LRIG3;TNIK;SSBP1;ALDH7A1;PCMTD1
Anandamide metabolism	2/7	0.333111	0.999995	1.9858	2.18295	PLD1;PLD3
Arachidonate epoxygenase/epoxide hydrolase pathway	2/7	0.333111	0.999995	1.9858	2.18295	COX8A;GSTP1
Attachment of GPI anchor to uPAR	2/7	0.333111	0.999995	1.9858	2.18295	PIGU;PIGT
Nef-mediated CD8 downregulation	2/7	0.333111	0.999995	1.9858	2.18295	AP2S1;AP2B1
PP2A-mediated dephosphorylation of key metabolic factors	2/7	0.333111	0.999995	1.9858	2.18295	PPP2R1A;PPP2R5D
Phase I of biological oxidations: non-cytochrome P450 enzymes	2/7	0.333111	0.999995	1.9858	2.18295	PON3;ESD
Vitamin D (calciferol) metabolism	2/7	0.333111	0.999995	1.9858	2.18295	CUBN;CYP2R1
Amino sugar and nucleotide sugar metabolism	9/45	0.337908	0.999995	1.24141	1.3469	CMAS;GALT;GNPDA1;NAGK;PMM1;HEXB;AMDHD2;FPGT;GALK2
Cysteine and methionine metabolism	7/34	0.340808	0.999995	1.28731	1.38571	MPST;CBS;GOT2;MAT2B;MAT1A;ENOPH1;TRDMT1
Fatty acid beta oxidation	7/34	0.340808	0.999995	1.28731	1.38571	ACSS2;LIPC;CHKB;ECI1;HADH;ACAT1;DECR1
Nuclear receptors in lipid metabolism and toxicity	7/34	0.340808	0.999995	1.28731	1.38571	ABCA1;ABCB1;NR1H3;CYP2E1;ABCB11;PPARA;ABCG1
Nuclear receptor transcription pathway	10/51	0.347783	0.999995	1.21112	1.27916	RXRA;THRA;RORC;NR1H3;RORA;NR3C1;PPARA;NR2C1;ESR1;NR3C2
TGF-beta regulation of skeletal system development	16/85	0.34832	0.999995	1.15157	1.21449	ACVR1;SMAD4;AMHR2;THBS2;BMP7;SMAD5;DCN;ACVR2A;RBX1;THBS3;RBL2;PPP2R1A;SP1;ID1;RPS6KB2;PITX2
Activation of NF-kappaB in B cells	13/68	0.349222	0.999995	1.17375	1.23484	PSMD10;PSMB6;PSMB7;PSMB4;PSMC5;PSMA4;PSMD4;PSMC3;PSMC1;PSMB1;PSME1;PSMF1;UBA52
Corticosteroids and cardioprotection	4/18	0.356693	0.999995	1.41851	1.46231	PDPK1;CALM3;PIK3R1;NR3C1
Effect of METS on macrophage differentiation	4/18	0.356693	0.999995	1.41851	1.46231	NCOR2;RBL2;HDAC2;SIN3A
Nicotinic acetylcholine receptor role in the regulation of apoptosis	4/18	0.356693	0.999995	1.41851	1.46231	CHRNB1;PDPK1;FASLG;PIK3R1
Phosphatidylcholine biosynthesis	4/18	0.356693	0.999995	1.41851	1.46231	CHKB;CHKA;SLC44A1;CEPT1
Lipoprotein metabolism	6/29	0.357216	0.999995	1.29523	1.33333	ABCA1;CETP;CUBN;LIPC;APOE;ABCG1
Statin pathway	6/29	0.357216	0.999995	1.29523	1.33333	ABCA1;CETP;LIPC;APOC1;APOE;ACSS1
Cardiac muscle contraction	15/80	0.361568	0.999995	1.14597	1.1658	COX8A;COX4I1;TPM1;CACNA2D3;COX7A2;UQCR11;CACNA2D4;UQCR10;COX5B;COX6C;COX7C;UQCRH;SLC9A6;UQCRC1;CYC1
MHC class II antigen presentation	19/103	0.363116	0.999995	1.12329	1.13793	DYNC2H1;DYNC1I2;DCTN2;DCTN1;DCTN3;CLTA;AP2B1;DNM1;CTSO;HLA-DMA;ACTR1B;HLA-DMB;CTSK;AP2S1;AP1S1;CTSH;SEC24C;SEC31A;RAB7A
Proteasome degradation	12/63	0.36355	0.999995	1.16837	1.18221	PSMD10;PSMB6;PSMB7;PSMB4;PSMC5;PSMA4;PSMD4;UBA7;PSMC3;PSMC1;PSMB1;PSME1
Phase I of biological oxidations: functionalization of compounds	13/69	0.369996	0.999995	1.15272	1.14611	PTGIS;ACSS2;ADH1B;ADH1A;FMO1;CYP3A5;CYP4F12;PTGS1;CYP27A1;CYP2R1;CYP2E1;ACSS1;PAOX
Activation of DNA fragmentation factor	3/13	0.375901	0.999995	1.48935	1.45722	DFFB;HMGB2;HMGB1
CTL mediated immune response against target cells	3/13	0.375901	0.999995	1.48935	1.45722	CD3G;FASLG;CD3D
Death receptor signaling	3/13	0.375901	0.999995	1.48935	1.45722	TNFSF10;FASLG;TRAF2
Glucose-dependent insulinotropic polypeptide (GIP) biosynthesis, secretion, and inactivation	3/13	0.375901	0.999995	1.48935	1.45722	DPP4;SPCS1;SEC11A
Platelet adhesion to exposed collagen	3/13	0.375901	0.999995	1.48935	1.45722	COL1A1;COL1A2;FYN
Purine salvage	3/13	0.375901	0.999995	1.48935	1.45722	DGUOK;GMPR2;APRT
Sulfur metabolism	3/13	0.375901	0.999995	1.48935	1.45722	CHST12;SUOX;PAPSS1
T helper cell surface molecules	3/13	0.375901	0.999995	1.48935	1.45722	CD2;CD3G;CD3D
p27 phosphorylation regulation during cell cycle progression	3/13	0.375901	0.999995	1.48935	1.45722	CDKN1B;CKS1B;RBX1
Cholesterol biosynthesis	5/24	0.375909	0.999995	1.30652	1.27831	SREBF1;EBP;HSD17B7;LSS;TM7SF2
Lysosome vesicle biogenesis	5/24	0.375909	0.999995	1.30652	1.27831	BLOC1S1;CLTA;AP1S1;ARRB1;VAMP2
Ras-independent pathway in NK cell-mediated cytotoxicity	5/24	0.375909	0.999995	1.30652	1.27831	CD2;KLRD1;PIK3R1;RAC1;LAT
SREBP signaling	5/24	0.375909	0.999995	1.30652	1.27831	SREBF1;INSIG2;SP1;SEC24C;SEC31A
Tumor suppressor Arf inhibits ribosomal biogenesis	5/24	0.375909	0.999995	1.30652	1.27831	POLR1D;TWIST1;ATM;PIK3R1;RAC1
Downstream signaling events Of B cell receptor (BCR)	18/98	0.376063	0.999995	1.11731	1.09273	PSMD10;CDKN1B;PDPK1;RASGRP1;PSMB6;PSMB7;PSMB4;PSMC5;PSMA4;PSMD4;PSMC3;PSMC1;PSMB1;RPS6KB2;PSME1;MLST8;PSMF1;UBA52
Arachidonic acid metabolism	11/58	0.379073	0.999995	1.16209	1.12726	CBR1;PTGIS;PLA2G4B;JMJD7-PLA2G4B;GPX7;CYP2E1;PLA2G5;LTA4H;PTGES;PTGS1;CBR3
Insulin biosynthesis and processing	8/41	0.380517	0.999995	1.20364	1.16299	SNAP25;SPCS1;CPE;SEC11A;DDOST;SRP9;VAMP2;EXOC1
CDC42 activity regulation	6/30	0.389491	0.999995	1.24119	1.17034	VAV3;ARHGEF9;ARHGEF25;ARHGAP1;ARHGEF7;FGD1
Inflammatory response pathway	6/30	0.389491	0.999995	1.24119	1.17034	COL1A1;ZAP70;COL3A1;COL1A2;IL2RB;THBS3
Interferon-beta enhancer pathway	6/30	0.389491	0.999995	1.24119	1.17034	SMARCE1;SMARCB1;SMARCC2;HMGB1;IRF6;NR3C1
PDGFA signaling pathway	6/30	0.389491	0.999995	1.24119	1.17034	MAP2K4;PDGFRA;RASA1;PRKCA;PIK3R1;EGFR
Retinoic acid receptor-mediated signaling	6/30	0.389491	0.999995	1.24119	1.17034	NCOA1;NCOR2;HDAC3;RXRA;RBP1;PRKCA
Extracellular matrix organization	17/93	0.38977	0.999995	1.11071	1.04651	COL13A1;CMA1;MMP2;COL1A1;MMP11;MMP14;COL3A1;COL1A2;COL5A1;COL6A2;COL6A1;TIMP2;COL6A3;CTSG;TPSAB1;COLGALT1;ELANE
Eicosanoid biosynthesis	4/19	0.397829	0.999995	1.32386	1.22025	PTGIS;LTA4H;PTGS1;PTGES
Hypoxic and oxygen homeostasis regulation of HIF-1-alpha	4/19	0.397829	0.999995	1.32386	1.22025	CUL2;ARNT;VHL;RBX1
Lissencephaly gene (LIS1) in neuronal migration and development	4/19	0.397829	0.999995	1.32386	1.22025	DNAH1;DCTN1;DCTN3;PAFAH1B1
STAT3 pathway	4/19	0.397829	0.999995	1.32386	1.22025	PIAS3;SLTM;AGTR1;RAC1
Tob role in T-cell activation	4/19	0.397829	0.999995	1.32386	1.22025	TGFBR3;SMAD4;CD3G;CD3D
BRCA1-dependent ubiquitin ligase activity	2/8	0.398564	0.999995	1.65473	1.52217	FANCE;FANCG
Downregulation of ERBB4 signaling	2/8	0.398564	0.999995	1.65473	1.52217	ITCH;UBA52
Hydrolysis of lysophosphatidylcholine (LPC)	2/8	0.398564	0.999995	1.65473	1.52217	PLA2G4B;PLBD1
Mechanism of acetaminophen activity and toxicity	2/8	0.398564	0.999995	1.65473	1.52217	CYP2E1;PTGS1
Nef-induced signal transduction	2/8	0.398564	0.999995	1.65473	1.52217	FYN;RAC1
Proepithelin conversion to epithelin and wound repair control	2/8	0.398564	0.999995	1.65473	1.52217	GRN;ELANE
TSP1-induced apoptosis in microvascular endothelial cell	2/8	0.398564	0.999995	1.65473	1.52217	GZMA;FYN
Transport of nucleotide sugars	2/8	0.398564	0.999995	1.65473	1.52217	SLC35B2;SLC35D2
Visceral fat deposits and the metabolic syndrome	2/8	0.398564	0.999995	1.65473	1.52217	RXRA;NR3C1
Generation of second messenger molecules	7/36	0.399776	0.999995	1.19839	1.09874	ENAH;ZAP70;CD3G;EVL;CD3D;LAT;NCK1
Caspase cascade in apoptosis	11/59	0.402056	0.999995	1.13781	1.03673	PIDD1;DFFB;SREBF1;NUMA1;CASP6;DIABLO;MADD;TNFSF10;CASP2;FASLG;TRAF2
Integrated breast cancer pathway	27/152	0.404175	0.999995	1.0726	0.971675	GRN;RALA;CERK;IRS1;MYCBP2;PIK3R2;BRCA2;EGFR;NUP85;CHEK2;RAC1;SMAD4;RALGAPA1;USP21;TSC1;ERAL1;ESR1;CCNB1IP1;PIAS1;RAD51;CDK4;SP1;PKIA;NOXA1;ATM;TAB1;FAU
Aldosterone-regulated sodium reabsorption	8/42	0.407936	0.999995	1.16817	1.04744	HSD11B2;IRS1;PDPK1;PIK3R2;PRKCA;PIK3R1;IGF1;NR3C2
BMP receptor signaling	8/42	0.407936	0.999995	1.16817	1.04744	SMAD4;CTDSP1;CTDSP2;CTDSPL;TAB1;RGMB;BMP7;SMAD5
Netrin-1 signaling	8/42	0.407936	0.999995	1.16817	1.04744	TRIO;TRPC1;NTN4;FYN;RAC1;RGMB;DOCK1;NCK1
VEGF, hypoxia, and angiogenesis	8/42	0.407936	0.999995	1.16817	1.04744	EIF2B4;EIF2S3;PDPK1;ARNT;PRKCA;PIK3R1;VHL;EIF2B1
Fc gamma receptor-mediated phagocytosis	17/94	0.407979	0.999995	1.09622	0.982805	VAV3;SPHK2;PLA2G4B;ARPC1A;ASAP3;PRKCA;PIK3R2;PIK3R1;ARPC5;PLD1;DNM1;MARCKS;FCGR2A;RPS6KB2;RAC1;WASF2;LAT
C-Myc pathway	5/25	0.411793	0.999995	1.24112	1.10116	KAT2A;TRRAP;ACTL6A;PIN1;SUPT3H
Cellular response to hypoxia	5/25	0.411793	0.999995	1.24112	1.10116	CUL2;ARNT;VHL;UBA52;RBX1
G0 and early G1 pathway	5/25	0.411793	0.999995	1.24112	1.10116	RBL2;LIN54;PCNA;LIN37;LIN9
ERBB1 downstream pathway	19/106	0.414432	0.999995	1.08436	0.955152	MAP2K4;MEF2C;RALA;PDPK1;RPS6;BRK1;PRKCA;PIK3R2;PIK3R1;ARPC5;PLD1;EGFR;PPP2R1A;ABI1;MLST8;CALM3;RAC1;WASF2;MAP2K5
ATM pathway	9/48	0.414628	0.999995	1.14571	1.00865	MDC1;DCLRE1C;RAD51;CTBP1;CHEK2;UIMC1;ATM;NBN;RAD9A
HES/HEY pathway	9/48	0.414628	0.999995	1.14571	1.00865	NCOA1;NCOR2;CDKN1B;KDM1A;CTBP1;MYB;ID1;TWIST1;ARNT
Activated NOTCH1 signaling in the nucleus	6/31	0.421728	0.999995	1.19147	1.02871	APH1A;ITCH;CNTN1;ARRB1;UBA52;MIB1
Alpha-6 beta-4 integrin signaling pathway	6/31	0.421728	0.999995	1.19147	1.02871	IRS1;EIF4EBP1;PIK3R2;PRKCA;PIK3R1;RAC1
CD28 co-stimulation	6/31	0.421728	0.999995	1.19147	1.02871	PDPK1;MLST8;PIK3R2;FYN;PIK3R1;RAC1
Lipid and lipoprotein metabolism	84/489	0.422452	0.999995	1.03012	0.887635	SLC27A1;CERK;SLC44A1;CHD9;HEXB;MTMR14;ECI1;INPPL1;AKR1B1;RORA;CROT;MED16;MED18;TM7SF2;PPP1CC;MCEE;LIPC;SIN3A;CYP2R1;HADH;ABCD1;NCOA1;TPTE2;CUBN;SREBF1;PRKAB2;PHYH;STARD5;ELOVL4;SPHK2;PLA2G4B;MED9;ELOVL6;LSS;MED29;SUMF2;MED23;NCOR2;CYP27A1;MED22;GNPAT;ACOX2;TBL1XR1;PLBD1;PPARA;SLC27A2;ABCG1;CDS1;CETP;HDAC3;SMARCD3;PIK3R2;PLA2G5;PIK3R1;PLD6;MTMR4;ABCB11;HSD17B7;PLD1;PLD3;ACAT1;HMGCL;EBP;RXRA;MED30;…
Glycogen breakdown (glycogenolysis)	3/14	0.424757	0.999995	1.35387	1.15923	PYGB;PHKG2;PHKA2
Glycosphingolipid biosynthesis: globo series	3/14	0.424757	0.999995	1.35387	1.15923	B3GALNT1;HEXB;B3GALT5
Hyaluronan metabolism	3/14	0.424757	0.999995	1.35387	1.15923	ABCC5;HEXB;GUSB
Lectin-induced complement pathway	3/14	0.424757	0.999995	1.35387	1.15923	C5;C6;C7
Polyamine metabolism	3/14	0.424757	0.999995	1.35387	1.15923	MRI1;ENOPH1;PAOX
ALK in cardiac myocytes	7/37	0.429293	0.999995	1.15837	0.979537	ACVR1;TGFBR3;MEF2C;SMAD4;RFC1;BMP7;SMAD5
PI3K/AKT activation	7/37	0.429293	0.999995	1.15837	0.979537	CDKN1B;IRS1;PDPK1;RPS6KB2;MLST8;PIK3R2;PIK3R1
Endochondral ossification	12/66	0.4293	0.999995	1.10326	0.932919	CDKN1C;HDAC4;ADAMTS5;MEF2C;IFT88;THRA;CALM3;SOX9;IGF1;BMP7;GLI3;IGF1R
Protein processing in the endoplasmic reticulum	29/166	0.436309	0.999995	1.05101	0.871711	TRAM1;PRKCSH;DERL2;RNF5;DNAJB2;ATXN3;SEC61A1;ERLEC1;SEC61G;MAN1C1;SSR1;CAPN1;UBXN6;SEC31A;SSR4;UBE2E3;SSR2;SYVN1;UBE4B;TRAF2;DDOST;RBX1;NSFL1C;DAD1;DNAJC10;ERP29;STT3A;MAN1B1;SEC24C
Golgi-associated vesicle biogenesis	4/20	0.438487	0.999995	1.24104	1.02315	BLOC1S1;CLTA;ARRB1;PUM1
Heparan sulfate/heparin glycosaminoglycan (HS-GAG) degradation	4/20	0.438487	0.999995	1.24104	1.02315	NAGLU;SDC2;GPC4;GUSB
G alpha 12 pathway	9/49	0.440289	0.999995	1.117	0.916299	VAV3;MAP2K4;MEF2C;PLD6;PLD1;MEF2D;MAP3K4;PLD3;MAP2K5
Basal cell carcinoma	10/55	0.444484	0.999995	1.1032	0.894524	TCF7L2;TCF7L1;FZD2;WNT5B;SMO;STK36;DVL2;AXIN2;GLI3;GLI2
Vibrio cholerae infection	10/55	0.444484	0.999995	1.1032	0.894524	SEC61A1;ATP6V1G1;ATP6AP1;KDELR1;SEC61G;ADCY3;PRKCA;ATP6V1E1;ATP6V1C1;ATP6V0A1
ERBB2 role in signal transduction and oncology	5/26	0.447349	0.999995	1.18194	0.950776	PDPK1;CARM1;PIK3R1;ESR1;EGFR
Fibroblast growth factor 1	5/26	0.447349	0.999995	1.18194	0.950776	CEBPA;EDNRA;MMP14;IGF1;IGF1R
PGC-1a regulation	5/26	0.447349	0.999995	1.18194	0.950776	MEF2C;CALM3;PPARA;MEF2D;PPARGC1A
Ras signaling pathway	5/26	0.447349	0.999995	1.18194	0.950776	RALA;PDPK1;PIK3R1;RAC1;PLD1
Leptin signaling pathway	11/61	0.448096	0.999995	1.09217	0.876736	NCOA1;KHDRBS1;IRS1;SP1;RPS6;PIK3R2;FYN;RAC1;PIK3R1;ESR1;SH2B1
Netrin-mediated signaling events	6/32	0.45372	0.999995	1.14557	0.905318	TRIO;FYN;PIK3R1;RAC1;DOCK1;NCK1
Signaling by Robo receptor	6/32	0.45372	0.999995	1.14557	0.905318	ENAH;ROBO3;EVL;RAC1;SRGAP3;NCK1
Signaling by NOTCH1	13/73	0.454056	0.999995	1.07562	0.849236	HDAC4;HDAC2;HDAC3;ARRB1;RBX1;MIB1;NCOR2;APH1A;KAT2A;ITCH;TBL1XR1;CNTN1;UBA52
Cyclin D-associated events in G1	7/38	0.458615	0.999995	1.12094	0.873818	RBL2;CDKN1B;CDKN2C;PPP2R1A;CDK4;UBA52;CKS1B
p38 alpha/beta MAPK downstream pathway	7/38	0.458615	0.999995	1.12094	0.873818	MEF2C;CSNK2A2;CSNK2B;EIF4EBP1;MITF;PPARGC1A;ESR1
Asparagine N-linked glycosylation	15/85	0.458831	0.999995	1.06379	0.828772	PMM1;PRKCSH;ALG5;ALG3;DOLK;DDOST;DPM3;FUT8;DAD1;MGAT4B;MAN1C1;STT3A;MAN1B1;SEC24C;SEC31A
COPII-mediated vesicle transport	2/9	0.460825	0.999995	1.41826	1.09878	SEC24C;SEC31A
Calcium-activated potassium channels	2/9	0.460825	0.999995	1.41826	1.09878	KCNMA1;KCNMB4
EGFR transactivation by gastrin	2/9	0.460825	0.999995	1.41826	1.09878	PRKCA;EGFR
G2/M DNA damage checkpoint	2/9	0.460825	0.999995	1.41826	1.09878	CHEK2;ATM
Inactivation of Cdc42 and Rac	2/9	0.460825	0.999995	1.41826	1.09878	RAC1;SRGAP3
Ketone body biosynthesis and degradation	2/9	0.460825	0.999995	1.41826	1.09878	HMGCL;ACAT1
Nef-mediated CD4 downregulation	2/9	0.460825	0.999995	1.41826	1.09878	AP2S1;AP2B1
PI3K/AKT signalling	2/9	0.460825	0.999995	1.41826	1.09878	PDPK1;MLST8
Prostanoid ligand receptors	2/9	0.460825	0.999995	1.41826	1.09878	PTGFR;PTGDR
West Nile virus infection	2/9	0.460825	0.999995	1.41826	1.09878	TIAL1;CASP6
AKAP95 role in mitosis and chromosome dynamics	3/15	0.4722	0.999995	1.24097	0.931168	PRKAG1;PPP2R5D;NCAPD2
Coagulation intrinsic pathway	3/15	0.4722	0.999995	1.24097	0.931168	F10;SERPING1;PRCP
Fatty acid omega oxidation	3/15	0.4722	0.999995	1.24097	0.931168	ADH1B;ADH1A;CYP2E1
Glycosphingolipid biosynthesis: ganglio series	3/15	0.4722	0.999995	1.24097	0.931168	HEXB;ST3GAL5;ST6GALNAC6
Glycosylation of mammalian N-linked oligosaccarides	3/15	0.4722	0.999995	1.24097	0.931168	MAN1C1;MAN2B1;FUT4
Mechanisms of transcriptional repression by DNA methylation	3/15	0.4722	0.999995	1.24097	0.931168	HDAC2;SIN3A;RBBP7
TRAF6-mediated induction of TAK1 complex	3/15	0.4722	0.999995	1.24097	0.931168	TICAM2;TAB1;UBA52
TrkA receptor signaling pathway	3/15	0.4722	0.999995	1.24097	0.931168	PDPK1;PRKCA;PIK3R1
Validated nuclear estrogen receptor beta network	3/15	0.4722	0.999995	1.24097	0.931168	NCOA1;SMARCE1;SMARCB1
S1P/S1P1 pathway	4/21	0.478301	0.999995	1.16797	0.861397	PDGFRB;PDGFB;RAC1;GNAI2
Y branching of actin filaments	4/21	0.478301	0.999995	1.16797	0.861397	ARPC1A;RAC1;WASF2;NCK1
Bile acid and bile salt metabolism	5/27	0.482324	0.999995	1.12815	0.822579	CYP27A1;AMACR;ACOX2;ABCB11;SLC27A2
ERK5 role in neuronal survival pathway	5/27	0.482324	0.999995	1.12815	0.822579	MEF2C;PDPK1;PIK3R1;MEF2D;MAP2K5
Proteins and DNA sequences in cardicac structures	5/27	0.482324	0.999995	1.12815	0.822579	MEF2C;SMARCD3;HAND2;NFATC3;PITX2
Propanoate metabolism	6/33	0.48528	0.999995	1.10308	0.79756	MCEE;ACSS2;SUCLG2;ACSS1;ALDH7A1;ACAT1
Vitamin A and carotenoid metabolism	7/39	0.487598	0.999995	1.08584	0.779921	RXRA;CRABP2;ADH1A;RBP1;CYP2E1;BCO1;DHRS3
Metabolism of vitamins and cofactors	9/51	0.491107	0.999995	1.06368	0.756374	SLC23A2;PANK2;PPCS;NAPRT;MOCOS;MOCS1;GPHN;COASY;AASDHPPT
PPAR signaling pathway	12/69	0.494831	0.999995	1.04501	0.735205	CYP27A1;SLC27A1;RXRA;ACOX2;PDPK1;SCD5;ILK;SLC27A6;NR1H3;PPARA;SLC27A2;PCK2
Glycolysis and gluconeogenesis	13/75	0.495829	0.999995	1.04079	0.730143	ACSS2;ADH1B;MDH2;ADH1A;GOT2;AKR1A1;PDHB;ENO2;ALDH3B1;GALM;ACSS1;ALDH7A1;PCK2
Signaling by EGFR in cancer	19/111	0.500431	0.999995	1.02512	0.709672	CDKN1B;PDE1B;SH3KBP1;PDPK1;PDE1A;CLTA;ADCY3;PRKCA;PIK3R1;AP2B1;EPN1;EGFR;RPS6KB2;MLST8;AP2S1;LRIG1;ARHGEF7;UBA52;EPS15
Syndecan 1 pathway	8/46	0.516061	0.999995	1.04496	0.69127	COL1A1;COL3A1;COL1A2;COL13A1;COL5A1;COL6A2;COL6A1;COL6A3
Transfer RNA aminoacylation	8/46	0.516061	0.999995	1.04496	0.69127	RARS2;SEPSECS;SARS2;PPA2;IARS2;VARS2;HARS2;EARS2
Endometrial cancer	9/52	0.516075	0.999995	1.03888	0.687222	TCF7L2;TCF7L1;PDPK1;ILK;PIK3R2;AXIN2;PIK3R1;MLH1;EGFR
Signaling events mediated by PTP1B	9/52	0.516075	0.999995	1.03888	0.687222	PDGFRB;FCGR2A;IRS1;PDGFB;FYN;CAPN1;PIK3R1;EGFR;LAT
AP-1 transcription factor network	12/70	0.516328	0.999995	1.02693	0.678814	TCF7L2;CDKN1B;MAF;COL1A2;DMTF1;SP1;MYB;TRIP6;NFATC3;NR3C1;GATA2;ESR1
Antiviral mechanism by interferon-stimulated genes	12/70	0.516328	0.999995	1.02693	0.678814	EIF4A2;PPM1B;NUP133;UBA7;NUP85;NUP62;PIN1;UBE2L6;NUP43;KPNA5;UBA52;NUP37
NCAM signaling for neurite out-growth	12/70	0.516328	0.999995	1.02693	0.678814	COL1A1;COL3A1;COL1A2;COL5A1;PTPRA;COL6A2;COL6A1;COL6A3;GFRA1;FYN;GFRA2;SPTBN1
Nef in HIV-1 replication and disease pathogenesis	5/28	0.516498	0.999995	1.07904	0.712902	AP2S1;AP1S1;FYN;RAC1;AP2B1
Phosphatidic acid biosynthesis	5/28	0.516498	0.999995	1.07904	0.712902	GNPAT;PLA2G4B;PLA2G5;GPD1L;PLD1
TGF-beta receptor activation of SMADs	5/28	0.516498	0.999995	1.07904	0.712902	PPP1CC;SMAD4;XPO1;MTMR4;UBA52
TRAIL signaling pathway	5/28	0.516498	0.999995	1.07904	0.712902	MAP2K4;TNFSF10;PIK3R2;TRAF2;PIK3R1
CTLA4 inhibitory signaling	4/22	0.516961	0.999995	1.10302	0.727757	PDPK1;PPP2R1A;PPP2R5D;FYN
Glycosaminoglycan biosynthesis: chondroitin sulfate	4/22	0.516961	0.999995	1.10302	0.727757	CHST12;UST;XYLT2;CHST14
B cell survival pathway	3/16	0.517763	0.999995	1.14544	0.753976	PDPK1;DPF2;PIK3R1
CRMPs in Sema3A signaling	3/16	0.517763	0.999995	1.14544	0.753976	DPYSL2;DPYSL3;FYN
GluR2-containing AMPA receptor trafficking	3/16	0.517763	0.999995	1.14544	0.753976	AP2S1;PRKCA;AP2B1
Glutamate neurotransmitter release cycle	3/16	0.517763	0.999995	1.14544	0.753976	SNAP25;SLC17A7;VAMP2
Nucleotide-like (purinergic) G-protein coupled receptors	3/16	0.517763	0.999995	1.14544	0.753976	P2RY6;ADORA3;LPAR4
Other glycan degradation	3/16	0.517763	0.999995	1.14544	0.753976	FUCA1;HEXB;MAN2B1
Primary bile acid biosynthesis	3/16	0.517763	0.999995	1.14544	0.753976	CYP27A1;AMACR;ACOX2
Protein kinase A (PKA) at the centrosome	3/16	0.517763	0.999995	1.14544	0.753976	NUP85;PRKAG1;PPP2R5D
NGF signaling via TRKA from the plasma membrane	23/136	0.518131	0.999995	1.01024	0.664263	MEF2C;RALA;CDKN1B;IRS1;PDE1B;PDPK1;KIDINS220;PDE1A;CLTA;ADCY3;PRKCA;PIK3R2;PPP2R5D;PIK3R1;AP2B1;DNM1;PPP2R1A;RPS6KA2;RPS6KB2;MLST8;AP2S1;DNAL4;MAP2K5
Activation of Src by protein tyrosine phosphatase alpha	2/10	0.519125	0.999995	1.2409	0.813548	PTPRA;PRKCA
Deregulation of CDK5 in Alzheimer's disease	2/10	0.519125	0.999995	1.2409	0.813548	PPP2R5D;CAPN1
Electron transport reaction in mitochondria	2/10	0.519125	0.999995	1.2409	0.813548	UQCRC1;SDHD
Ganglio sphingolipid metabolism	2/10	0.519125	0.999995	1.2409	0.813548	ST3GAL5;ST6GALNAC6
IRAK2-mediated activation of TAK1 complex	2/10	0.519125	0.999995	1.2409	0.813548	TAB1;UBA52
Insulin secretion regulation by acetylcholine	2/10	0.519125	0.999995	1.2409	0.813548	MARCKS;PRKCA
PIP biosynthesis at the late endosome membrane	2/10	0.519125	0.999995	1.2409	0.813548	FIG4;MTMR4
Purine catabolism	2/10	0.519125	0.999995	1.2409	0.813548	NT5C;NT5E
Signal-dependent regulation of myogenesis by corepressor MITR	2/10	0.519125	0.999995	1.2409	0.813548	MEF2C;MEF2D
Splicing regulation through Sam68	2/10	0.519125	0.999995	1.2409	0.813548	KHDRBS1;RASA1
Tetrahydrobiopterin (BH4) biosynthesis, recycling, salvage and regulation	2/10	0.519125	0.999995	1.2409	0.813548	GCHFR;PRKG2
T cell signal transduction	14/83	0.536235	0.999995	1.00702	0.627557	VAV3;MAP2K4;NFATC3;CD3G;PRKCA;CD3D;RASGRP1;ZAP70;PPP3R1;PRDX1;MAP3K4;MAP2K5;LAT;NCK1
Melanoma	12/71	0.537556	0.999995	1.00946	0.626596	PDGFRB;PDGFRA;FGF7;CDK4;PDGFD;PDGFB;MITF;PIK3R2;PIK3R1;IGF1;EGFR;IGF1R
Glioma	11/65	0.538401	0.999995	1.01102	0.625977	PDGFRB;PDGFRA;CDK4;PDGFB;PRKCA;PIK3R2;CALM3;PIK3R1;IGF1;EGFR;IGF1R
Telomere maintenance	10/59	0.539411	0.999995	1.0129	0.625241	RFC5;POLA1;ACD;POLA2;RFC4;PCNA;LIG1;RFC1;PRIM1;RPA2
Regulation of NFAT transcription factors	8/47	0.542137	0.999995	1.0181	0.623318	ITCH;POU2F1;MAF;CDK4;NFATC3;FASLG;CALM3;GATA3
Regulation of transcription by NOTCH1 intracellular domain	8/47	0.542137	0.999995	1.0181	0.623318	HDAC4;NCOR2;HDAC2;KAT2A;HDAC3;TBL1XR1;UBA52;RBX1
Ether lipid metabolism	6/35	0.546448	0.999995	1.02688	0.620562	PLA2G4B;JMJD7-PLA2G4B;PLA2G5;CEPT1;PLD1;PAFAH1B1
Interleukin-2/PI3K pathway	6/35	0.546448	0.999995	1.02688	0.620562	MYB;RPS6;IL2RB;CALM3;PIK3R1;RAC1
Linoleic acid metabolism	6/35	0.546448	0.999995	1.02688	0.620562	PLA2G4B;JMJD7-PLA2G4B;PLA2G5;CYP2E1;CYP3A5;ABCD1
ADP-ribosylation factor	5/29	0.549682	0.999995	1.03402	0.618771	KDELR1;ARHGAP1;CLTA;ARAP1;ARFGAP1
Histidine metabolism	5/29	0.549682	0.999995	1.03402	0.618771	ALDH3B1;TRMT11;HNMT;LCMT1;ALDH7A1
Influence of Ras and Rho proteins on G1 to S transition	5/29	0.549682	0.999995	1.03402	0.618771	CDKN1B;PDPK1;CDK4;PIK3R1;RAC1
Post-translational modification: biosynthesis of GPI-anchored proteins	5/29	0.549682	0.999995	1.03402	0.618771	PIGC;PIGU;DPM3;PIGT;PIGM
Thyroid cancer	5/29	0.549682	0.999995	1.03402	0.618771	TCF7L2;TCF7L1;RXRA;PAX8;CCDC6
Angiogenesis	4/23	0.55422	0.999995	1.0449	0.616694	PDGFRA;PDGFB;TIMP2;ARNT
CREB transcription factor and its extracellular signals	4/23	0.55422	0.999995	1.0449	0.616694	PDPK1;PRKCA;PIK3R1;RAC1
Downregulation of SMAD2/3-SMAD4 transcriptional activity	4/23	0.55422	0.999995	1.0449	0.616694	NCOR2;SMAD4;UBA52;TRIM33
Eicosanoid metabolism	4/23	0.55422	0.999995	1.0449	0.616694	PTGFR;PTGIS;PTGS1;PTGES
Incretin biosynthesis, secretion, and inactivation	4/23	0.55422	0.999995	1.0449	0.616694	DPP4;TCF7L2;SPCS1;SEC11A
Mitochondrial fatty acid beta-oxidation	4/23	0.55422	0.999995	1.0449	0.616694	MCEE;ECI1;HADH;DECR1
Signaling by bone morphogenetic protein (BMP)	4/23	0.55422	0.999995	1.0449	0.616694	SMAD4;FSTL1;SMAD5;ACVR2A
Beta-1 integrin cell surface interactions	11/66	0.560221	0.999995	0.992582	0.575125	COL1A1;COL3A1;COL1A2;COL5A1;MDK;COL6A2;FGG;COL6A1;ITGA11;COL6A3;THBS2
HIF-1 transcriptional activity in hypoxia	11/66	0.560221	0.999995	0.992582	0.575125	NCOA1;NT5E;SMAD4;ABCB1;CXCL12;FECH;CITED2;SP1;ARNT;RORA;GATA2
ABCA transporters in lipid homeostasis	3/17	0.561103	0.999995	1.06356	0.614582	ABCA10;ABCD1;ABCG1
Apoptotic cleavage of cellular proteins	3/17	0.561103	0.999995	1.06356	0.614582	STK24;CASP6;ACIN1
Atypical NF-kappaB pathway	3/17	0.561103	0.999995	1.06356	0.614582	CSNK2A2;CSNK2B;PIK3R1
Beta-catenin phosphorylation cascade	3/17	0.561103	0.999995	1.06356	0.614582	AMER1;PPP2R1A;PPP2R5D
Cells and molecules involved in local acute inflammatory response	3/17	0.561103	0.999995	1.06356	0.614582	C5;C6;C7
Complement activation, classical pathway	3/17	0.561103	0.999995	1.06356	0.614582	C5;C6;C7
NO2-dependent IL-12 pathway in NK cells	3/17	0.561103	0.999995	1.06356	0.614582	CD2;CD3G;CD3D
Nitric oxide metabolism	3/17	0.561103	0.999995	1.06356	0.614582	GCHFR;NOSIP;PRKG2
Osteoclast signaling	3/17	0.561103	0.999995	1.06356	0.614582	ATP6V1G1;CTSK;PDGFB
Ephrin receptor B forward pathway	10/60	0.562276	0.999995	0.992584	0.571493	MAP2K4;EFNB1;RASA1;FGG;FYN;RAC1;PIK3R1;PTPN13;DNM1;NCK1
Apoptosis	40/242	0.567219	0.999995	0.98257	0.557126	HRK;PSMD10;DIABLO;HMGB2;PIK3R2;FASLG;PIK3R1;HMGB1;ADD1;IGF1R;PSMB6;PSMB7;PPP3R1;PSMB4;PSMD4;CASP6;PSMB1;TNFSF10;CHP1;CASP2;BMF;PSMF1;CAPN1;DFFB;MAP2K4;DBNL;DAPK2;TRAF2;IGF1;PSMC5;PSMA4;PSMC3;STK24;PSMC1;PSME1;NMT1;ACIN1;ATM;IRF6;UBA52
Diurnally regulated genes with circadian orthologs	8/48	0.567639	0.999995	0.992588	0.562072	SF3A3;PURA;HLA-DMA;PSMA4;PPP1R3C;GSTP1;GFRA1;AZIN1
Fatty acid metabolism	7/42	0.571239	0.999995	0.99259	0.555798	ADH1B;ADH1A;ECI1;ECI2;HADH;ALDH7A1;ACAT1
Signaling events mediated by T cell protein tyrosine phosphatase (TC-PTP)	7/42	0.571239	0.999995	0.99259	0.555798	PDGFRB;RAB4A;PDGFB;PIK3R2;PIK3R1;EGFR;PIAS1
Acetylcholine neurotransmitter release cycle	2/11	0.57304	0.999995	1.10296	0.614126	SNAP25;VAMP2
Attenuation of GPCR signaling	2/11	0.57304	0.999995	1.10296	0.614126	ARRB1;PRKCA
CD28-dependent Vav1 pathway	2/11	0.57304	0.999995	1.10296	0.614126	FYN;RAC1
Erythropoietin-mediated neuroprotection through NF-kB	2/11	0.57304	0.999995	1.10296	0.614126	ARNT;GRIN1
Glypican-3 pathway	2/11	0.57304	0.999995	1.10296	0.614126	FGF7;MDK
Keratan sulfate degradation	2/11	0.57304	0.999995	1.10296	0.614126	HEXB;OGN
Purine ribonucleoside monophosphate biosynthesis	2/11	0.57304	0.999995	1.10296	0.614126	ADSL;IMPDH2
SLBP-dependent processing of replication-dependent histone pre-mRNAs	2/11	0.57304	0.999995	1.10296	0.614126	SNRPE;SNRPF
Stress fiber formation mediated by Rho-selective guanine exchange factor AKAP13	2/11	0.57304	0.999995	1.10296	0.614126	LPAR1;PRKAG1
Myc active pathway	14/85	0.574701	0.999995	0.978536	0.542016	SMAD4;TRRAP;ACTL6A;CAD;RPL11;BMI1;SUPT3H;KAT2A;MTA1;CDK4;PEG10;UBTF;NDUFAF2;NBN
Glycogen metabolism	6/36	0.575782	0.999995	0.992593	0.547938	PYGB;PPP2R1A;PHKG2;PPP2R5D;CALM3;PHKA2
Steroid hormone, vitamin A, and vitamin D metabolism	6/36	0.575782	0.999995	0.992593	0.547938	CUBN;STARD5;SRD5A1;CYP2R1;AKR1B1;BCO1
Myc repressed pathway	12/73	0.579003	0.999995	0.976249	0.533469	PDGFRB;CEBPA;SMAD4;CDKN1B;TBP;HDAC3;COL1A2;NFYB;SP1;NFYC;CLU;MXD4
T cell receptor signaling in naive CD4+ T cells	11/67	0.581625	0.999995	0.974798	0.528272	MAP4K1;ZAP70;DBNL;PDPK1;CD3G;PRKCA;FYN;CD3D;RASGRP1;LAT;NCK1
Biosynthesis of the N-glycan precursor (dolichol lipid-linked oligosaccharide, LLO) and transfer to a nascent protein	5/30	0.58172	0.999995	0.992595	0.537754	DPM3;PMM1;ALG5;ALG3;DOLK
Butanoate metabolism	5/30	0.58172	0.999995	0.992595	0.537754	HMGCL;ACSM5;PDHB;HADH;ACAT1
Ovarian infertility genes	5/30	0.58172	0.999995	0.992595	0.537754	CDKN1B;CDK4;MSH5;ATM;MLH1
TNFR1 signaling pathway	5/30	0.58172	0.999995	0.992595	0.537754	DFFB;MAP2K4;MADD;CASP2;TRAF2
p38-alpha and p38-beta regulation	5/30	0.58172	0.999995	0.992595	0.537754	MAP2K4;RALA;FYN;RAC1;TAB1
Amino acid metabolism	32/195	0.583693	0.999995	0.97409	0.524431	PSMD10;HIBADH;MRI1;MAT2B;ACAT1;PSMB6;PSMB7;PSMB4;PSMD4;CBS;PSMB1;DBT;PCBD1;PSMF1;CKB;ENOPH1;GAMT;ACAD8;BCKDHA;GOT2;MAT1A;SUOX;AZIN1;GATM;PSMC5;PSMA4;PSMC3;PSMC1;PSME1;ALDH7A1;BCAT2;PAOX
Clathrin derived vesicle budding	10/61	0.584664	0.999995	0.973063	0.522261	TBC1D8B;SNX2;BLOC1S1;CLTA;AP1S1;ARRB1;PUM1;AP4B1;VAMP2;SNX5
Calcineurin-dependent NFAT signaling role in lymphocytes	9/55	0.588232	0.999995	0.97095	0.515219	PPP3R1;XPO1;RCAN2;NFATC3;CHP1;PRKCA;CALM3;MEF2D;CABIN1
Angiopoietin receptor Tie2-mediated signaling	8/49	0.592488	0.999995	0.96832	0.506843	ELF2;MMP2;RASA1;AGTR1;FYN;RAC1;PIK3R1;NCK1
Muscle contraction	8/49	0.592488	0.999995	0.96832	0.506843	ACTA2;MYL1;TNNC2;TPM1;MYL6B;SORBS3;MYL12B;TTN
Apoptosis modulation and signaling	13/80	0.596118	0.999995	0.962832	0.498089	HRK;DFFB;DIABLO;HTRA2;FASLG;PTPN13;PIDD1;CASP6;MADD;TNFSF10;CASP2;BIRC6;BMF
Beta-3 integrin cell surface interactions	7/43	0.597668	0.999995	0.96496	0.496685	PDGFRB;COL1A1;COL1A2;FGG;PDGFB;HMGB1;CD47
Porphyrin and chlorophyll metabolism	7/43	0.597668	0.999995	0.96496	0.496685	FECH;UROD;MMAB;PPOX;GUSB;EARS2;BLVRA
AMPK inhibition of chREBP transcriptional activation activity	1/5	0.600647	0.999995	1.24083	0.632509	PRKAB2
APOBEC3G-mediated resistance to HIV-1 infection	1/5	0.600647	0.999995	1.24083	0.632509	PSIP1
Abacavir transmembrane transport	1/5	0.600647	0.999995	1.24083	0.632509	ABCB1
Activation of RAS in B cells	1/5	0.600647	0.999995	1.24083	0.632509	RASGRP1
Beta-oxidation of lauroyl-CoA to decanoyl-CoA	1/5	0.600647	0.999995	1.24083	0.632509	HADH
CREB phosphorylation through the activation of adenylate cyclase	1/5	0.600647	0.999995	1.24083	0.632509	ADCY3
Cytochrome P450 metabolism of eicosanoids	1/5	0.600647	0.999995	1.24083	0.632509	PTGIS
Disinhibition of SNARE formation	1/5	0.600647	0.999995	1.24083	0.632509	PRKCA
Dopamine receptors	1/5	0.600647	0.999995	1.24083	0.632509	DRD4
Extrinsic pathway	1/5	0.600647	0.999995	1.24083	0.632509	F10
FasL/CD95L signaling	1/5	0.600647	0.999995	1.24083	0.632509	FASLG
Flap intermediate removal from the telomere lagging strand (C-strand)	1/5	0.600647	0.999995	1.24083	0.632509	RPA2
G-protein signaling through tubby proteins	1/5	0.600647	0.999995	1.24083	0.632509	TUB
GDP-mannose biosynthesis	1/5	0.600647	0.999995	1.24083	0.632509	PMM1
Heme degradation	1/5	0.600647	0.999995	1.24083	0.632509	BLVRA
Insulin receptor substrate (IRS) activation	1/5	0.600647	0.999995	1.24083	0.632509	IRS1
Ion channel and phorbal esters signaling pathway	1/5	0.600647	0.999995	1.24083	0.632509	PRKCA
N-glycan trimming and elongation in the cis-Golgi	1/5	0.600647	0.999995	1.24083	0.632509	MAN1C1
Neuroregulin receptor degredation protein-1 controls ErbB3 receptor recycling	1/5	0.600647	0.999995	1.24083	0.632509	EGFR
Nifedipine activity	1/5	0.600647	0.999995	1.24083	0.632509	PCNA
Phenylalanine, tyrosine and tryptophan biosynthesis	1/5	0.600647	0.999995	1.24083	0.632509	GOT2
Polo-like kinase 3 (PLK3) pathway	1/5	0.600647	0.999995	1.24083	0.632509	CHEK2
Sodium-coupled phosphate cotransporters	1/5	0.600647	0.999995	1.24083	0.632509	SLC34A1
Sulfide oxidation to sulfate	1/5	0.600647	0.999995	1.24083	0.632509	SUOX
Botulinum neurotoxicity	3/18	0.601984	0.999995	0.992599	0.503768	SNAP25;VAMP1;VAMP2
CBL signaling regulation	3/18	0.601984	0.999995	0.992599	0.503768	PIK3R2;FYN;PIK3R1
Downregulation of MTA-3 in ER-negative breast tumors	3/18	0.601984	0.999995	0.992599	0.503768	MTA1;ESR1;MTA3
Human cytomegalovirus and MAP kinase pathways	3/18	0.601984	0.999995	0.992599	0.503768	PDPK1;SP1;PIK3R1
Nucleotide di- and triphosphate biosynthesis and interconversion	3/18	0.601984	0.999995	0.992599	0.503768	RRM1;GUK1;CTPS2
Pertussis toxin-insensitive CCR5 signaling in macrophage	3/18	0.601984	0.999995	0.992599	0.503768	CXCL12;PRKCA;CALM3
FRA pathway	6/37	0.604134	0.999995	0.960516	0.48406	COL1A2;DMTF1;SP1;MMP2;NFATC3;DCN
Pathways in cancer	53/325	0.61217	0.999995	0.966532	0.47432	CDKN1B;FASLG;BRCA2;GLI3;GLI2;IGF1R;CKS1B;FGF7;RAC1;PDGFRB;PIAS4;PDGFRA;PIAS3;WNT5B;DAPK2;MMP2;FLT3LG;ARNT;PRKCA;MITF;TRAF2;AXIN2;PIAS1;RBX1;PAX8;SMO;TRAF5;CEBPA;HDAC2;RALA;CTBP1;GSTP1;CUL2;PDGFB;PIK3R2;PIK3R1;PLD1;EGFR;RXRA;STK36;DVL2;VHL;RUNX1T1;TCF7L2;SMAD4;TCF7L1;FZD2;JUP;IGF1;MLH1;RAD51;CDK4;CCDC6
Alpha-V beta-3 integrin/OPN pathway	5/31	0.612488	0.999995	0.954361	0.467853	VAV3;MMP2;ILK;PIK3R1;RAC1
Ras family activation regulation	5/31	0.612488	0.999995	0.954361	0.467853	LGALS3;RASA1;PRKCA;CALM3;RASGRP1
Prolactin activation of MAPK signaling	12/75	0.618806	0.999995	0.945143	0.453633	PIAS3;ZAP70;IRS1;RPS6KA2;RPS6;EIF4EBP1;SIRPA;PIK3R2;FYN;NEK3;RAC1;PIK3R1
Activation of chaperones by ATF6 alpha	2/12	0.622401	0.999995	0.992601	0.470662	NFYB;NFYC
ERK inactivation	2/12	0.622401	0.999995	0.992601	0.470662	PPP2R1A;PPP2R5D
Facilitative sodium-independent glucose transporters	2/12	0.622401	0.999995	0.992601	0.470662	SLC2A10;SLC2A12
Rab GTPases mark targets in the endocytotic machinery	2/12	0.622401	0.999995	0.992601	0.470662	RAB4A;RAB7A
Reversible hydration of carbon dioxide	2/12	0.622401	0.999995	0.992601	0.470662	CA12;CA3
SODD/TNFR1 signaling pathway	2/12	0.622401	0.999995	0.992601	0.470662	MADD;TRAF2
SRF and microRNAs in smooth muscle differentiation and proliferation	2/12	0.622401	0.999995	0.992601	0.470662	MEF2C;MEF2D
Salmonella infection	2/12	0.622401	0.999995	0.992601	0.470662	ARPC1A;RAC1
Interactions of HIV Vpr protein with host cellular proteins	7/44	0.623231	0.999995	0.938824	0.443912	XPO1;NUP133;NUP85;NUP62;PSIP1;NUP43;NUP37
Vasopressin-regulated water reabsorption	7/44	0.623231	0.999995	0.938824	0.443912	DYNC2H1;DYNC1I2;RAB5B;DCTN2;DCTN1;ADCY3;VAMP2
DARPP-32 events	4/25	0.623804	0.999995	0.945274	0.446093	PPP3R1;PPP2R1A;PPP2R5D;CALM3
Fatty acid biosynthesis	4/25	0.623804	0.999995	0.945274	0.446093	ACSS2;ECHDC2;HADH;DECR1
Signaling by NOTCH	19/119	0.630925	0.999995	0.942651	0.434156	HDAC4;HDAC2;HDAC3;ARRB1;RFNG;RBX1;MIB1;APH1A;NCOR2;MOV10;KAT2A;ITCH;TBL1XR1;AGO1;CNTN1;ST3GAL6;UBA52;TNRC6A;TNRC6B
Acute myeloid leukemia	9/57	0.633387	0.999995	0.930381	0.424881	CEBPA;TCF7L2;TCF7L1;JUP;RPS6KB2;EIF4EBP1;PIK3R2;PIK3R1;RUNX1T1
SHP2 signaling	9/57	0.633387	0.999995	0.930381	0.424881	PDGFRB;IRS1;SDC2;IL2RB;PDGFB;PIK3R1;FRS3;EGFR;IGF1R
Oocyte meiosis	18/113	0.633659	0.999995	0.940042	0.428889	ADCY3;PPP2R5D;IGF1;IGF1R;RBX1;PPP1CC;PPP3R1;CPEB1;CDC23;PPP2R1A;PTTG2;RPS6KA2;CDC16;CHP1;ANAPC4;ANAPC5;CALM3;ANAPC1
RIG-I/MDA5-mediated induction of interferon-alpha/beta pathways	12/76	0.637997	0.999995	0.930319	0.418105	RNF135;ITCH;UBA7;DHX58;PCBP2;PIN1;UBE2L6;TRAF2;HMGB1;UBA52;ATG12;ATG5
Alpha-linolenic acid metabolism	3/19	0.640264	0.999995	0.930506	0.41489	PLA2G4B;JMJD7-PLA2G4B;PLA2G5
Cell cycle progression regulation by PLK3	3/19	0.640264	0.999995	0.930506	0.41489	CASP6;CHEK2;ATM
Glycosaminoglycan degradation	3/19	0.640264	0.999995	0.930506	0.41489	NAGLU;HEXB;GUSB
Inhibition of T cell receptor signaling by activated Csk	3/19	0.640264	0.999995	0.930506	0.41489	ZAP70;CD3G;CD3D
Signaling by constitutively active EGFR	3/19	0.640264	0.999995	0.930506	0.41489	PIK3R1;UBA52;EGFR
Small ligand GPCRs	3/19	0.640264	0.999995	0.930506	0.41489	PTGFR;LPAR1;PTGDR
Tamoxifen metabolism	3/19	0.640264	0.999995	0.930506	0.41489	FMO1;CYP2E1;CYP3A5
Alpha-synuclein signaling	5/32	0.641889	0.999995	0.918959	0.407411	GRK5;FYN;PPP2R5D;PARK7;PLD1
Prostate cancer	14/89	0.647397	0.999995	0.926124	0.402675	PDGFRB;PDGFRA;TCF7L2;TCF7L1;CDKN1B;PDPK1;GSTP1;PDGFB;PIK3R2;PIK3R1;IGF1;EGFR;IGF1R;PDGFD
Integrin-linked kinase signaling	7/45	0.647866	0.999995	0.914063	0.396769	XPO1;NACA;ILK;ELMO2;RAC1;ARHGEF7;CKAP5
T cell receptor signaling pathway	22/139	0.652192	0.999995	0.932778	0.398685	VAV3;MAP2K4;NFATC3;ARHGAP1;PRKCA;PIK3R2;CD3G;PIK3R1;ARAP1;RASGRP1;CD3D;ARFGAP1;ZAP70;PPP3R1;CDK4;RASA1;CHP1;CALM3;FYN;RAC1;LAT;NCK1
Steroid biosynthesis	4/26	0.655887	0.999995	0.902252	0.380541	EBP;HSD17B7;LSS;TM7SF2
G13 signaling pathway	6/39	0.657569	0.999995	0.902194	0.378205	RTKN;MYL1;PIK3R2;CALM3;RAC1;MAP3K4
GAB1 signalosome	6/39	0.657569	0.999995	0.902194	0.378205	CDKN1B;PDPK1;RPS6KB2;MLST8;PIK3R1;EGFR
Iron uptake and transport	6/39	0.657569	0.999995	0.902194	0.378205	ATP6V1G1;HEPH;SLC40A1;ATP6V1E1;ATP6V1C1;ATP6V0A1
Notch signaling pathway	19/121	0.660955	0.999995	0.924056	0.382623	HDAC2;KDM1A;RING1;CTBP1;PIK3R2;DTX3;GATA3;PIK3R1;RFNG;DNM1;MIB1;APH1A;NCOR2;KAT2A;ITCH;DVL2;CNTN1;CIR1;EPS15
Rac1 cell motility signaling pathway	11/71	0.662194	0.999995	0.909592	0.374931	MAP2K4;PDGFRA;TRIO;ABI1;NOXA1;BRK1;RAC1;PIK3R1;ARPC5;PLD1;WASF2
Apoptotic execution phase	8/52	0.662493	0.999995	0.902136	0.37145	DFFB;DBNL;STK24;CASP6;HMGB2;ACIN1;HMGB1;ADD1
Vitamin B12 metabolism	8/52	0.662493	0.999995	0.902136	0.37145	ABCA1;CUBN;MCEE;SHMT2;CBS;MMAB;MAT1A;APOE
Fas signaling pathway	18/115	0.664342	0.999995	0.920548	0.376466	MAP2K4;RFC1;DIABLO;PDPK1;PDCD6;CAD;NFATC3;PIK3R2;FASLG;TRAF2;PIK3R1;PTPN13;EGFR;ACTA2;SLTM;CYC1;CD47;CSNK1G1
Adenylate cyclase inhibitory pathway	2/13	0.667219	0.999995	0.902311	0.365108	ADCY3;GNAI2
Alpha-hemoglobin stabilizing enzyme (AHSP) pathway	2/13	0.667219	0.999995	0.902311	0.365108	FECH;UROD
Angiotensin-converting enzyme 2 regulation of heart function	2/13	0.667219	0.999995	0.902311	0.365108	CMA1;AGTR1
Arylsulfatase activation	2/13	0.667219	0.999995	0.902311	0.365108	ARSD;SUMF2
Chondroitin sulfate/dermatan sulfate degradation	2/13	0.667219	0.999995	0.902311	0.365108	HEXB;DCN
Keap1-Nrf2 pathway	2/13	0.667219	0.999995	0.902311	0.365108	MAF;PRKCA
N-glycan trimming in the ER and calnexin/calreticulin cycle	2/13	0.667219	0.999995	0.902311	0.365108	PRKCSH;MAN1B1
PIP biosynthesis at the early endosome membrane	2/13	0.667219	0.999995	0.902311	0.365108	FIG4;MTMR4
Signal regulatory protein (SIRP) family interactions	2/13	0.667219	0.999995	0.902311	0.365108	SIRPA;CD47
TACI and BCMA stimulation of B cell immune responses	2/13	0.667219	0.999995	0.902311	0.365108	TNFSF13;TRAF2
Activation of C3 and C5	1/6	0.667635	0.999995	0.992604	0.401025	C5
Beta-oxidation of very long chain fatty acids	1/6	0.667635	0.999995	0.992604	0.401025	ABCD1
Bile acid and bile salt biosynthesis via 27-hydroxycholesterol	1/6	0.667635	0.999995	0.992604	0.401025	CYP27A1
Cytochrome P450 metabolism of vitamins	1/6	0.667635	0.999995	0.992604	0.401025	CYP2R1
ER quality control compartment (ERQC)	1/6	0.667635	0.999995	0.992604	0.401025	MAN1B1
FGFR2b ligand binding and activation	1/6	0.667635	0.999995	0.992604	0.401025	FGF7
Fas signaling pathway in hepatocytes	1/6	0.667635	0.999995	0.992604	0.401025	EGFR
G beta-gamma signaling through PI3K gamma	1/6	0.667635	0.999995	0.992604	0.401025	PDPK1
Interleukin-1-beta (IL-1b) processing pathway	1/6	0.667635	0.999995	0.992604	0.401025	P2RX7
Klotho-mediated ligand binding	1/6	0.667635	0.999995	0.992604	0.401025	KL
Low-density lipoprotein (LDL) pathway during atherogenesis	1/6	0.667635	0.999995	0.992604	0.401025	ACAT1
NADE-dependent death signaling	1/6	0.667635	0.999995	0.992604	0.401025	CASP2
Small leucine-rich proteoglycan (SLRP) molecules	1/6	0.667635	0.999995	0.992604	0.401025	DCN
Vitamin B6 metabolism	1/6	0.667635	0.999995	0.992604	0.401025	PDXP
LPA receptor mediated events	10/65	0.66848	0.999995	0.902077	0.36331	MMP2;TRIP6;LPAR1;ADCY3;RAC1;LPAR4;PIK3R1;ADRA1B;EGFR;GNAI2
Fluoropyrimidine activity	5/33	0.669855	0.999995	0.886085	0.355049	RRM1;UCK1;ABCC5;DPYD;ERCC2
Polo-like kinase 1 (PLK1) pathway	7/46	0.671523	0.999995	0.890572	0.354632	GOLGA2;NUDC;STAG2;PPP2R1A;INCENP;NINL;KIZ
Chromosome maintenance	16/103	0.672008	0.999995	0.912323	0.362635	RFC5;DIDO1;ACD;UBE2I;RFC4;PCNA;LIG1;RFC1;PRIM1;RPA2;POLA1;POLA2;STAG2;MIS18BP1;RBBP7;CENPQ
Adaptive immune system	98/606	0.672343	0.999995	0.956154	0.379581	UBE2L6;UBE3A;NPEPPS;CDC23;HERC2;PSMD4;PPP2R1A;FBXO4;AP1S1;DYNC2H1;FBXW8;UBE2E3;FBXO17;RBX1;PSME1;ANAPC4;ANAPC5;UBA52;ANAPC1;PSMD10;CUL7;CUL5;UBA7;CUL3;CUL2;PIK3R2;PIK3R1;KLHL13;RASGRP1;TNFRSF14;PSMF1;SEC31A;CDC16;MKRN1;BLMH;KLRD1;SAE1;LAT;RNF220;DET1;CDKN1B;SH3KBP1;CLTA;CD3G;CD3D;MRC2;TRIM9;SEC61A1;CTSO;ACTR1B;CTSK;SEC61G;MLST8;CTSH;RAC1;CD34;NCK1;PDPK1;TRPC1;PPP2R5D;DNM1;PJA2;ENAH;ZAP70;PSMA4;EV…
Signaling by NGF	35/221	0.672959	0.999995	0.933206	0.369615	HDAC2;RALA;TRIO;CDKN1B;HDAC3;PDE1B;IRS1;PDE1A;CLTA;ADCY3;PIK3R2;PIK3R1;FGD1;APH1A;PPP2R1A;RPS6KA2;AP2S1;MLST8;CASP2;RAC1;MAP2K5;VAV3;MEF2C;KIDINS220;PDPK1;ARHGEF18;PRKCA;PPP2R5D;AP2B1;DNM1;ARHGEF9;RPS6KB2;ARHGEF7;UBA52;DNAL4
ATF2 transcription factor network	9/59	0.675716	0.999995	0.893058	0.350064	HRK;PDGFRA;POU2F1;CDK4;MMP2;CUL3;PRKCA;PPARGC1A;ESR1
Apoptotic signaling in response to DNA damage	3/20	0.675871	0.999995	0.875718	0.343065	CASP6;PRKCA;ATM
Cell differentiation pathway	3/20	0.675871	0.999995	0.875718	0.343065	MEF2C;TLX2;MEF2D
Sprouty regulation of tyrosine kinase signals	3/20	0.675871	0.999995	0.875718	0.343065	SH3KBP1;RASA1;EGFR
Urea cycle and metabolism of amino groups	3/20	0.675871	0.999995	0.875718	0.343065	GAMT;GATM;CKB
Insulin signaling pathway	44/277	0.678864	0.999995	0.93639	0.362696	PYGB;SNAP25;PRKAA1;IRS1;PRKAG1;INPPL1;RORC;PIK3R2;PIK3R1;IGF1R;PPP1CC;RHOT2;RHOT1;RPS6KA2;PHKG2;EIF4EBP1;RAC1;EIF2B1;PPARGC1A;MAP3K4;MAP2K5;PCK2;NCK1;MAP4K1;SREBF1;MAP2K4;EIF2B4;PRKAB2;RAB4A;PDPK1;RPS6;PRKCA;TSC1;PHKA2;PRKAB1;ARHGAP33;PPP1R3C;PTPRA;RASA1;RPS6KB2;CALM3;SGK3;VAMP2;EXOC1
Costimulation by the CD28 family	11/72	0.680899	0.999995	0.894627	0.343841	PPP2R1A;PDPK1;MLST8;CD3G;PPP2R5D;PIK3R2;FYN;TNFRSF14;RAC1;PIK3R1;CD3D
Neural crest differentiation	14/91	0.681174	0.999995	0.90196	0.346296	HDAC4;HDAC2;TCF7L1;HDAC3;TWIST1;MITF;AXIN2;BMP7;MYB;ID1;DVL2;PMP22;MBP;SOX9
JNK/MAPK pathway	8/53	0.684157	0.999995	0.882035	0.334793	MAP2K4;MEF2C;NFATC3;RAC1;TAB1;MEF2D;MAP3K4;MAP2K5
BAD phosphorylation regulation	4/27	0.686071	0.999995	0.862972	0.325145	PDPK1;PIK3R1;IGF1;IGF1R
Collecting duct acid secretion	4/27	0.686071	0.999995	0.862972	0.325145	ATP6V1G1;ATP6V1E1;ATP6V1C1;ATP6V0A1
FSH signaling pathway	4/27	0.686071	0.999995	0.862972	0.325145	RPS6;RPS6KB2;EIF4EBP1;PRKCA
Insulin regulation of blood glucose	4/27	0.686071	0.999995	0.862972	0.325145	PPP1CC;ASIP;CALM3;VAMP2
Signaling by TGF-beta receptor complex	10/66	0.687812	0.999995	0.885915	0.331545	NCOR2;PPP1CC;SMAD4;XPO1;SP1;ARHGEF18;MTMR4;UBA52;TRIM33;MEN1
Fc epsilon receptor I signaling pathway	12/79	0.692372	0.999995	0.888502	0.326641	VAV3;MAP2K4;PLA2G4B;JMJD7-PLA2G4B;PRKCA;PIK3R2;FYN;RAC1;PIK3R1;PLA2G5;MS4A2;LAT
Glycerophospholipid metabolism	12/79	0.692372	0.999995	0.888502	0.326641	PLA2G15;CDS1;GNPAT;CHKB;CHKA;PLA2G4B;JMJD7-PLA2G4B;PLA2G5;CEPT1;GPD1L;PLD1;DGKZ
p73 transcription factor network	12/79	0.692372	0.999995	0.888502	0.326641	ITCH;RAD51;BIN1;SP1;CASP2;PIN1;UBE4B;BUB3;BRCA2;RCHY1;PFDN5;DCP1B
Fructose and mannose metabolism	5/34	0.696341	0.999995	0.855479	0.309612	PMM1;FPGT;SORD;AKR1B1;PHPT1
Induction of apoptosis through DR3 and DR4/5 death receptors	5/34	0.696341	0.999995	0.855479	0.309612	DFFB;CASP6;TNFSF12;TNFSF10;TRAF2
N-cadherin signaling events	5/34	0.696341	0.999995	0.855479	0.309612	JUP;DCTN1;CALM3;PIK3R1;RAC1
Epidermal growth factor receptor (EGFR) pathway	17/111	0.697869	0.999995	0.897047	0.32269	VAV3;MAP2K4;PDPK1;PRKCA;PIK3R2;PIK3R1;EGFR;ACTA2;RHOT2;RHOT1;EEF2K;RPS6KA2;TCEAL1;RPS6KB2;RAC1;MAP2K5;NCK1
Glycerophospholipid biosynthesis	13/86	0.703042	0.999995	0.883375	0.311247	CDS1;CHKB;SLC44A1;CHKA;PLA2G4B;PLA2G5;PLD6;PLD1;PLD3;GNPAT;PLBD1;CEPT1;GPD1L
Progesterone-mediated oocyte maturation	13/86	0.703042	0.999995	0.883375	0.311247	ADCY3;PIK3R2;PIK3R1;IGF1;IGF1R;GNAI2;CPEB1;CDC23;RPS6KA2;CDC16;ANAPC4;ANAPC5;ANAPC1
Meiotic recombination	8/54	0.70493	0.999995	0.862808	0.301687	RAD51;CDK4;MSH5;RPA2;ATM;NBN;BRCA2;MLH1
RANKL signaling pathway	8/54	0.70493	0.999995	0.862808	0.301687	CTSK;TRAF5;MITF;TRAF2;PIK3R2;RAC1;PIK3R1;TAB1
Transcriptional activity of SMAD2/SMAD3-SMAD4 heterotrimer	6/41	0.706277	0.999995	0.850538	0.295772	NCOR2;SMAD4;SP1;UBA52;TRIM33;MEN1
Tyrosine metabolism	6/41	0.706277	0.999995	0.850538	0.295772	ADH1B;ADH1A;ALDH3B1;GOT2;TRMT11;LCMT1
Adipocytokine signaling pathway	10/67	0.706441	0.999995	0.87032	0.30245	PRKAB2;PRKAA1;RXRA;IRS1;PRKAG1;TRAF2;PPARA;PRKAB1;PPARGC1A;PCK2
G alpha 13 pathway	10/67	0.706441	0.999995	0.87032	0.30245	MAP2K4;PDPK1;LPAR1;ARHGEF18;PRKCA;PLD6;ARHGEF7;PLD1;PHKA2;PLD3
cAMP cell motility pathway inferred from amoeba model	10/67	0.706441	0.999995	0.87032	0.30245	RPS4X;ACTA2;AMY2A;PDE1B;PDE1A;BRK1;PDE5A;PDE7B;PDE7A;PLCD1
AKT phosphorylation of cytosolic targets	2/14	0.70763	0.999995	0.827068	0.286029	CDKN1B;PDPK1
Activation of Rac	2/14	0.70763	0.999995	0.827068	0.286029	RAC1;NCK1
CARM1 transcriptional regulation by protein methylation	2/14	0.70763	0.999995	0.827068	0.286029	RXRA;CARM1
Coagulation common pathway	2/14	0.70763	0.999995	0.827068	0.286029	F10;FGG
Interleukin-6 regulation of target genes	2/14	0.70763	0.999995	0.827068	0.286029	ABCC5;DCN
Sema3A-plexin repulsion signaling by inhibiting integrin adhesion	2/14	0.70763	0.999995	0.827068	0.286029	FYN;RAC1
p53 activity regulation	18/118	0.707675	0.999995	0.89277	0.308694	RPL5;DYRK2;PCNA;CSE1L;EI24;RPL11;IGF1;RCHY1;PIDD1;CDK4;TTC5;CHEK2;CCNG1;KAT8;PIN1;E4F1;ATM;CSNK1G1
Mitochondrial role in apoptotic signaling	3/21	0.708799	0.999995	0.827017	0.284645	DFFB;DIABLO;CASP6
T cell activation co-stimulatory signal	3/21	0.708799	0.999995	0.827017	0.284645	CD3G;PIK3R1;CD3D
Cell cycle: G1/S checkpoint	4/28	0.714333	0.999995	0.826965	0.278196	SMAD4;CDKN1B;CDK4;ATM
Interleukin receptor SHC signaling	4/28	0.714333	0.999995	0.826965	0.278196	IL2RB;INPPL1;PIK3R2;PIK3R1
Glucose metabolism	9/61	0.714958	0.999995	0.858606	0.288089	PYGB;PPP2R1A;MDH2;PHKG2;GOT2;PPP2R5D;ENO2;PHKA2;PCK2
Chondroitin sulfate/dermatan sulfate metabolism	7/48	0.715767	0.999995	0.847027	0.283246	CHST12;HEXB;SDC2;UST;CHST14;GPC4;DCN
Lipid digestion, mobilization, and transport	7/48	0.715767	0.999995	0.847027	0.283246	ABCA1;CETP;PPP1CC;CUBN;LIPC;APOE;ABCG1
Adherens junction cell adhesion	11/74	0.716412	0.999995	0.866122	0.288852	TCF7L2;SMAD4;TCF7L1;CSNK2A2;CSNK2B;FYN;RAC1;ACP1;WASF2;EGFR;IGF1R
Arf6 signal transduction regulation	5/35	0.721323	0.999995	0.826914	0.270126	ACAP2;AGTR1;ARRB1;EGFR;NCK1
Autophagy regulation	5/35	0.721323	0.999995	0.826914	0.270126	PRKAA1;ULK1;GABARAP;ATG12;ATG5
Basal transcription factors	5/35	0.721323	0.999995	0.826914	0.270126	TAF6L;TBP;TAF6;TAF4;GTF2H4
EGF receptor (ErbB1) signaling pathway	5/35	0.721323	0.999995	0.826914	0.270126	RASA1;PIK3R2;PIK3R1;EGFR;NCK1
Primary immunodeficiency	5/35	0.721323	0.999995	0.826914	0.270126	ZAP70;DCLRE1C;IGLL1;RFXANK;CD3D
Acetylcholine biosynthesis	1/7	0.72339	0.999995	0.82712	0.267828	CHKA
Activation of PKC through G-protein coupled receptors	1/7	0.72339	0.999995	0.82712	0.267828	PRKCA
Apoptotic factor-mediated response	1/7	0.72339	0.999995	0.82712	0.267828	DIABLO
BAD activation and translocation to mitochondria	1/7	0.72339	0.999995	0.82712	0.267828	PPP3R1
CREB phosphorylation	1/7	0.72339	0.999995	0.82712	0.267828	RPS6KA2
Cyanoamino acid metabolism	1/7	0.72339	0.999995	0.82712	0.267828	SHMT2
FYVE-finger proteins in vesicle transport	1/7	0.72339	0.999995	0.82712	0.267828	EGFR
Gamma-secretase-mediated ErbB4 signaling pathway	1/7	0.72339	0.999995	0.82712	0.267828	PRKCA
Internal ribosome entry pathway	1/7	0.72339	0.999995	0.82712	0.267828	EIF4A2
Neurofascin interactions	1/7	0.72339	0.999995	0.82712	0.267828	CNTN1
PELP1 modulation of estrogen receptor activity	1/7	0.72339	0.999995	0.82712	0.267828	ESR1
SARS coronavirus protease	1/7	0.72339	0.999995	0.82712	0.267828	FBL
Spermatogenesis regulation by CREM	1/7	0.72339	0.999995	0.82712	0.267828	XPO1
Vitamin A uptake in enterocytes	1/7	0.72339	0.999995	0.82712	0.267828	BCO1
T cell receptor signaling in naive CD8+ T cells	8/55	0.724793	0.999995	0.8444	0.271786	ZAP70;PDPK1;CD3G;PRKCA;FYN;CD3D;RASGRP1;LAT
Signaling by the B cell receptor (BCR)	23/151	0.726421	0.999995	0.891047	0.284801	PSMD10;CDKN1B;SH3KBP1;PDPK1;TRPC1;PIK3R1;RASGRP1;PSMB6;PSMB7;PSMB4;PSMC5;PSMA4;PSMD4;PSMC3;PSMC1;PSMB1;RPS6KB2;PSME1;MLST8;FYN;PSMF1;UBA52;NCK1
Hexose transport	6/42	0.728783	0.999995	0.826862	0.261602	NUP133;NUP85;NUP62;NUP43;SLC37A4;NUP37
Signaling events mediated by focal adhesion kinase	9/62	0.733372	0.999995	0.842356	0.261216	MAP2K4;MMP14;RASA1;FYN;RAC1;PIK3R1;ARHGEF7;DOCK1;NCK1
Arf6 integrin-mediated signaling pathway	7/49	0.736314	0.999995	0.82681	0.253086	RALA;BIN1;ITGA11;AGTR1;CPE;PLD1;EXOC1
AKT signaling pathway	3/22	0.73909	0.999995	0.783442	0.236863	PDPK1;FASLG;PIK3R1
Nitric oxide signaling pathway	3/22	0.73909	0.999995	0.783442	0.236863	PRKCA;CALM3;GRIN1
TRAF6 mediated NF-kB activation	3/22	0.73909	0.999995	0.783442	0.236863	RNF135;TRAF2;HMGB1
IGF1 pathway	4/29	0.740678	0.999995	0.793839	0.238302	IRS1;PDPK1;PIK3R1;IGF1R
Integrin beta-2 pathway	4/29	0.740678	0.999995	0.793839	0.238302	FCGR2A;F10;FGG;JAM3
Pentose and glucuronate interconversions	4/29	0.740678	0.999995	0.793839	0.238302	DCXR;AKR1B1;CRYL1;GUSB
Reelin signaling pathway	4/29	0.740678	0.999995	0.793839	0.238302	LRPAP1;FYN;PIK3R1;PAFAH1B1
S1P/S1P3 pathway	4/29	0.740678	0.999995	0.793839	0.238302	PDGFRB;PDGFB;RAC1;GNAI2
Transferrin endocytosis and recycling	4/29	0.740678	0.999995	0.793839	0.238302	ATP6V1G1;ATP6V1E1;ATP6V1C1;ATP6V0A1
ATM-dependent DNA damage response	12/82	0.741532	0.999995	0.850269	0.254262	RBL2;SMAD4;CDKN1B;WNT5B;IRS1;DVL2;FASLG;ATM;HMGB1;RAC1;MAP3K4;PCK2
Activation of IRF3/IRF7 mediated by TBK1/IKK epsilon	2/15	0.74385	0.999995	0.763402	0.225903	TICAM2;UBA52
Arf6 vesicle-mediated transport	2/15	0.74385	0.999995	0.763402	0.225903	RAC1;PLD1
Cytochrome P450 metabolism of xenobiotics	2/15	0.74385	0.999995	0.763402	0.225903	CYP2E1;CYP3A5
Eicosanoid ligand-binding G-protein coupled receptors	2/15	0.74385	0.999995	0.763402	0.225903	PTGFR;PTGDR
Extrinsic prothrombin activation pathway	2/15	0.74385	0.999995	0.763402	0.225903	F10;FGG
Mu-calpain pathway	2/15	0.74385	0.999995	0.763402	0.225903	CAPN1;RAC1
Prolactin receptor signaling pathway	2/15	0.74385	0.999995	0.763402	0.225903	RBX1;SH2B1
Sema3A/PAK-dependent axon repulsion	2/15	0.74385	0.999995	0.763402	0.225903	FYN;RAC1
Phospholipids as signaling intermediaries	5/36	0.744798	0.999995	0.800191	0.235771	PDGFRA;PDPK1;PRKCA;PIK3R1;RAC1
Transport to the Golgi and subsequent modification	5/36	0.744798	0.999995	0.800191	0.235771	FUT8;MGAT4B;MAN1C1;SEC24C;SEC31A
VEGF signaling pathway	11/76	0.749297	0.999995	0.83937	0.242259	PPP3R1;SPHK2;PLA2G4B;JMJD7-PLA2G4B;NFATC3;CHP1;PRKCA;PIK3R2;RAC1;PIK3R1;PLA2G5
Cell differentiation by G alpha (i/o) pathway inferred from mouse Neuro2A model	6/43	0.750045	0.999995	0.804466	0.231382	MAP2K4;RALA;ILK;HTR1B;RASGRP1;MAP2K5
Phosphatidylinositol metabolism	7/50	0.755799	0.999995	0.807533	0.226093	TPTE2;FIG4;MTMR14;INPPL1;PIK3R2;PIK3R1;MTMR4
Meiosis	12/83	0.756702	0.999995	0.838243	0.23369	DIDO1;ACD;UBE2I;RAD51;STAG2;CDK4;MSH5;RPA2;ATM;NBN;BRCA2;MLH1
G alpha q pathway	10/70	0.757971	0.999995	0.826655	0.229075	GRK5;PDPK1;AGTR1;PRKCA;RGS12;PLD6;ADRA1B;PLD1;PHKA2;PLD3
Pancreatic cancer	10/70	0.757971	0.999995	0.826655	0.229075	RALA;SMAD4;RAD51;CDK4;PIK3R2;RAC1;PIK3R1;BRCA2;PLD1;EGFR
Phagosome	23/154	0.760694	0.999995	0.870483	0.238099	DYNC2H1;COLEC12;DYNC1I2;ATP6V1G1;RAB5B;ATP6AP1;C1R;TUBB;STX18;THBS2;THBS3;MRC2;SEC61A1;HLA-DMA;HLA-DMB;FCGR2A;SEC61G;RAC1;SFTPA1;ATP6V1E1;ATP6V1C1;ATP6V0A1;RAB7A
Keratinocyte differentiation	8/57	0.761752	0.999995	0.809837	0.220385	MAP2K4;CEBPA;SP1;FASLG;PPP2R5D;PRKCA;TRAF2;EGFR
Apoptosis intrinsic pathway	4/30	0.765132	0.999995	0.763261	0.20433	PPP3R1;DIABLO;NMT1;BMF
Interleukin-2/STAT5 pathway	4/30	0.765132	0.999995	0.763261	0.20433	SP1;IL2RB;FASLG;PIK3R1
Nectin adhesion pathway	4/30	0.765132	0.999995	0.763261	0.20433	PDGFRB;PDGFB;PIK3R1;RAC1
Nuclear events mediated by MAP kinases	4/30	0.765132	0.999995	0.763261	0.20433	MEF2C;PPP2R1A;RPS6KA2;PPP2R5D
O-glycan biosynthesis	4/30	0.765132	0.999995	0.763261	0.20433	GALNT12;GALNT11;GALNT6;GALNT16
Latent infection of Homo sapiens with Mycobacterium tuberculosis	5/37	0.766776	0.999995	0.775138	0.205846	ATP6V1G1;ATP6V1E1;FGD1;ATP6V1C1;ATP6V0A1
BAD phosphorylation mediated by IGF1R signaling	3/23	0.76682	0.999995	0.744226	0.197594	IRS1;PIK3R1;IGF1R
Blood clotting cascade	3/23	0.76682	0.999995	0.744226	0.197594	F8A1;F10;FGG
Cyclins and cell cycle regulation	3/23	0.76682	0.999995	0.744226	0.197594	CDKN1B;CDKN2C;CDK4
Interleukin-11 pathway	3/23	0.76682	0.999995	0.744226	0.197594	IL11RA;MMP23B;HOXA6
Nitrogen metabolism	3/23	0.76682	0.999995	0.744226	0.197594	CA12;CA3;AMT
PDGFB signaling pathway	19/129	0.766974	0.999995	0.856437	0.227214	PDGFRB;MAP2K4;RAB4A;PDGFB;BRK1;PRKCA;PIK3R2;PIK3R1;ARPC5;ARAP1;ACTA2;PPP2R1A;RASA1;ABI1;PIN1;FYN;RAC1;WASF2;NCK1
Angiotensin II-stimulated signaling through G-proteins and beta-arrestin	9/64	0.767739	0.999995	0.811627	0.214517	MAP2K4;GRK5;PLCL2;AGTR1;ARRB1;PRKCA;MAP3K4;MAP2K5;PLCD1
Collagen biosynthesis and modifying enzymes	9/64	0.767739	0.999995	0.811627	0.214517	COL1A1;COL3A1;COL1A2;COL13A1;COL5A1;COL6A2;COL6A1;COL6A3;COLGALT1
MAPK cascade role in angiogenesis	9/64	0.767739	0.999995	0.811627	0.214517	MAP2K4;MMP14;PDPK1;MMP2;TIMP2;PRKCA;RAC1;VHL;NCK1
Binding of RNA by insulin-like growth factor 2 mRNA binding proteins (IGF2BPs/IMPs/VICKZs)	1/8	0.769793	0.999995	0.708917	0.185477	IGF2BP3
Binding of orexin and neuropeptides FF and QRFP to their receptors	1/8	0.769793	0.999995	0.708917	0.185477	HCRTR2
Bystander B cell activation	1/8	0.769793	0.999995	0.708917	0.185477	FASLG
Codeine and morphine metabolism	1/8	0.769793	0.999995	0.708917	0.185477	ABCB1
Cytoskeletal remodeling regulation and cell spreading by IPP complex components	1/8	0.769793	0.999995	0.708917	0.185477	RSU1
Degradation of cysteine and homocysteine	1/8	0.769793	0.999995	0.708917	0.185477	SUOX
Fatty acid elongation in mitochondria	1/8	0.769793	0.999995	0.708917	0.185477	HADH
Formyl peptide interaction with formyl peptide receptors	1/8	0.769793	0.999995	0.708917	0.185477	CCL23
Glucocorticoid and mineralcorticoid metabolism	1/8	0.769793	0.999995	0.708917	0.185477	HSD11B2
Import of palmitoyl-CoA into the mitochondrial matrix	1/8	0.769793	0.999995	0.708917	0.185477	PRKAB2
Lysine catabolism	1/8	0.769793	0.999995	0.708917	0.185477	ALDH7A1
Lysosphingolipid and lysophosphatidic acid (LPA) G-protein coupled receptors	1/8	0.769793	0.999995	0.708917	0.185477	LPAR1
Mitochondrial beta-oxidation of saturated fatty acids	1/8	0.769793	0.999995	0.708917	0.185477	HADH
Mitotic metaphase/anaphase transition	1/8	0.769793	0.999995	0.708917	0.185477	STAG2
Nicotinate metabolism	1/8	0.769793	0.999995	0.708917	0.185477	NAPRT
SREBP control of lipid biosynthesis	1/8	0.769793	0.999995	0.708917	0.185477	SREBF1
Sema4D-mediated inhibition of cell attachment and migration	1/8	0.769793	0.999995	0.708917	0.185477	RAC1
Shuttle for transfer of acetyl groups from mitochondria to the cytosol	1/8	0.769793	0.999995	0.708917	0.185477	CS
Support of platelet aggregation by Eph kinases and ephrins	1/8	0.769793	0.999995	0.708917	0.185477	FYN
Thiamine metabolism	1/8	0.769793	0.999995	0.708917	0.185477	PHPT1
Transcription factor regulation of microRNAs related to cardiac hypertrophy	1/8	0.769793	0.999995	0.708917	0.185477	PPP3R1
Vitamin C (ascorbate) metabolism	1/8	0.769793	0.999995	0.708917	0.185477	SLC23A2
PI3K events in ERBB2 signaling	6/44	0.770069	0.999995	0.783248	0.204644	CDKN1B;PDPK1;RPS6KB2;MLST8;PIK3R1;EGFR
ECM-receptor interaction	12/84	0.771256	0.999995	0.826551	0.214685	COL1A1;COL3A1;COL1A2;COL5A1;COL6A2;SDC2;COL6A1;ITGA11;COL6A3;CD47;THBS2;THBS3
Bacterial invasion of epithelial cells	10/71	0.773672	0.999995	0.813054	0.208636	ARPC1A;CLTA;ILK;PIK3R2;RAC1;PIK3R1;ARPC5;DOCK1;WASF2;DNM1
Acyl chain remodelling of phosphatidylinositol	2/16	0.776148	0.999995	0.708831	0.179626	PLBD1;PLA2G5
Cell death signaling by NRIF in the nucleus	2/16	0.776148	0.999995	0.708831	0.179626	APH1A;UBA52
Cell-extracellular matrix interactions	2/16	0.776148	0.999995	0.708831	0.179626	ILK;RSU1
Control of cell cycle and breast tumor growth by estrogen-responsive protein Efp	2/16	0.776148	0.999995	0.708831	0.179626	CDK4;ESR1
Hypoxia-inducible factor in the cardivascular system	2/16	0.776148	0.999995	0.708831	0.179626	ARNT;VHL
Inhibition of platelet activation by aspirin	2/16	0.776148	0.999995	0.708831	0.179626	PRKCA;PTGS1
Interleukin-10 anti-inflammatory signaling pathway	2/16	0.776148	0.999995	0.708831	0.179626	IL10RA;BLVRA
Interleukin-9 signaling pathway	2/16	0.776148	0.999995	0.708831	0.179626	PIK3R2;PIK3R1
JNK (c-Jun kinases) phosphorylation and activation mediated by activated human TAK1	2/16	0.776148	0.999995	0.708831	0.179626	MAP2K4;TAB1
KIT signaling regulation	2/16	0.776148	0.999995	0.708831	0.179626	PRKCA;FYN
LPA4-mediated signaling events	2/16	0.776148	0.999995	0.708831	0.179626	ADCY3;LPAR4
Rb tumor suppressor/checkpoint signaling in response to DNA damage	2/16	0.776148	0.999995	0.708831	0.179626	CDK4;ATM
Sprouty regulation of FGF signaling	2/16	0.776148	0.999995	0.708831	0.179626	PPP2R1A;UBA52
TGF-beta receptor signaling in EMT (epithelial to mesenchymal transition)	2/16	0.776148	0.999995	0.708831	0.179626	ARHGEF18;UBA52
Signaling by SCF-KIT	11/78	0.779499	0.999995	0.814216	0.202825	CDKN1B;PDPK1;CMA1;RPS6KB2;MLST8;PRKCA;PIK3R2;FYN;RAC1;PIK3R1;GRAP
Developmental biology	65/420	0.781675	0.999995	0.90692	0.223389	ROBO3;TRIO;CHD9;CLTA;MED16;MED18;DPYSL2;RPS6KA2;DPYSL3;BOC;RAC1;NCK1;NCOA1;SREBF1;MEF2C;TRPC1;CSNK2A2;EBF1;MED9;GFRA1;RGMB;GFRA2;MED29;DNM1;MED23;NCOR2;ENAH;MED22;TBL1XR1;COL6A2;CSNK2B;COL6A1;COL6A3;EVL;PPARA;DOCK1;CEBPA;HDAC3;SMARCD3;NTN4;EGFR;MYL12B;RXRA;MED30;AP2S1;FYN;SRGAP3;PPARGC1A;MEF2D;MYH10;SPTBN1;CDK19;SMAD4;NR2F2;AP2B1;ACVR2A;COL1A1;COL3A1;COL1A2;COL5A1;CDK4;PTPRA;CARM1;CNTN1;CD24
Interleukin-12-mediated signaling events	9/65	0.783691	0.999995	0.797085	0.194281	EOMES;PPP3R1;SPHK2;GZMA;IL2RB;CD3G;FASLG;CD3D;RAB7A
MicroRNAs in cardiomyocyte hypertrophy	12/85	0.785192	0.999995	0.815179	0.197133	HDAC4;MAP2K4;FZD2;PDPK1;PIK3R2;CALM3;RAC1;PIK3R1;IGF1;TAB1;MAP2K5;IGF1R
EGFR interaction with phospholipase C-gamma	5/38	0.787285	0.999995	0.751604	0.179758	PDE1B;PDE1A;ADCY3;PRKCA;EGFR
ERBB4 signaling events	5/38	0.787285	0.999995	0.751604	0.179758	ITCH;LRIG1;PIK3R2;FYN;PIK3R1
Glycosphingolipid metabolism	5/38	0.787285	0.999995	0.751604	0.179758	GALC;CERK;HEXB;ARSD;SUMF2
Striated muscle contraction	5/38	0.787285	0.999995	0.751604	0.179758	ACTA2;MYL1;TNNC2;TPM1;TTN
Gluconeogenesis	4/31	0.787746	0.999995	0.734947	0.175343	MDH2;GOT2;ENO2;PCK2
One-carbon metabolism	4/31	0.787746	0.999995	0.734947	0.175343	SHMT2;AMT;MAT2B;MAT1A
Transport of vitamins, nucleosides, and related molecules	4/31	0.787746	0.999995	0.734947	0.175343	SLC35B2;SLC27A1;SLC35D2;SLC27A6
Myocyte adrenergic pathway	10/72	0.788635	0.999995	0.799892	0.189936	PPP3R1;GRK5;PLA2G4B;ARRB1;RAC1;ADRA1B;PITX2;ALDH7A1;GNAI2;GRIN1
Drug metabolism: other enzymes	7/52	0.791608	0.999995	0.77155	0.180303	UCK1;IMPDH2;DPYD;GUSB;CYP3A5;ITPA;UCKL1
Dorso-ventral axis formation	3/24	0.792097	0.999995	0.708744	0.165188	PIWIL2;CPEB1;EGFR
Endogenous Toll-like receptor signaling	3/24	0.792097	0.999995	0.708744	0.165188	HMGB1;SFTPA1;TIRAP
Triacylglyceride biosynthesis	3/24	0.792097	0.999995	0.708744	0.165188	GNPAT;LIPC;MOGAT1
Signaling events mediated by hepatocyte growth factor receptor (c-Met)	11/79	0.793593	0.999995	0.802194	0.185455	MAP2K4;SH3KBP1;PDPK1;INPPL1;MLST8;EIF4EBP1;RAC1;PIK3R1;RIN2;EPS15;NCK1
Senescence and autophagy	14/99	0.796123	0.999995	0.816675	0.186203	CDKN1B;IGFBP5;KMT2A;IGF1;BMI1;GABARAP;IGF1R;COL1A1;MMP14;MLST8;COMMD3-BMI1;ULK1;SLC39A3;ATG5
Post-translational protein modification	29/196	0.797689	0.999995	0.860638	0.194536	GALNT12;GALNT11;PIGU;PIGT;GALNT16;PRKCSH;FUT8;MAN1C1;ARSD;SEC31A;VKORC1;GALNT6;PMM1;F10;ALG5;DHPS;ALG3;DOLK;SUMF2;DDOST;PIGC;DPM3;DAD1;MGAT4B;STT3A;PIGM;MAN1B1;GAS6;SEC24C
Signaling by ERBB4	13/93	0.803365	0.999995	0.805739	0.176414	CDKN1B;PDPK1;PIK3R1;ESR1;EGFR;RBX1;APH1A;ITCH;CXCL12;RPS6KB2;MLST8;UBA52;SH2B1
Carbohydrate metabolism	35/235	0.804432	0.999995	0.867144	0.188707	PRPS2;PYGB;GALT;AMY2A;AMY2B;SDC2;HEXB;ENO2;NAGLU;PPP2R1A;CHST12;NUP85;NUP62;PHKG2;ST3GAL6;NUP43;CHST14;GPC4;PGLS;GUSB;SLC37A4;PCK2;NUP133;MDH2;AMY1A;AMY1B;ABCC5;GOT2;PPP2R5D;PHKA2;DCN;HS3ST2;OGN;UST;NUP37
Activation of BH3-only proteins	2/17	0.80482	0.999995	0.661535	0.143643	PPP3R1;BMF
Acyl chain remodelling of phosphatidylglycerol	2/17	0.80482	0.999995	0.661535	0.143643	PLA2G4B;PLA2G5
Acyl chain remodelling of phosphatidylserine	2/17	0.80482	0.999995	0.661535	0.143643	PLA2G4B;PLA2G5
Beta-arrestin-dependent recruitment of Src kinases in GPCR signaling	2/17	0.80482	0.999995	0.661535	0.143643	ARRB1;DNM1
Chylomicron-mediated lipid transport	2/17	0.80482	0.999995	0.661535	0.143643	LIPC;APOE
Dendritic cells in regulating TH1 and TH2 development	2/17	0.80482	0.999995	0.661535	0.143643	CD2;TLR7
G1/S-specific transcription	2/17	0.80482	0.999995	0.661535	0.143643	POLA1;PCNA
Glycosylphosphatidylinositol (GPI) biosynthesis	2/17	0.80482	0.999995	0.661535	0.143643	PIGC;PIGM
PIP biosynthesis at the Golgi membrane	2/17	0.80482	0.999995	0.661535	0.143643	TPTE2;FIG4
Phenylalanine metabolism	2/17	0.80482	0.999995	0.661535	0.143643	ALDH3B1;GOT2
Platelet sensitization by LDL	2/17	0.80482	0.999995	0.661535	0.143643	PPP2R1A;PPP2R5D
Post-chaperonin tubulin folding pathway	2/17	0.80482	0.999995	0.661535	0.143643	TBCB;TBCA
SHC1 events in EGFR signaling	2/17	0.80482	0.999995	0.661535	0.143643	IRS1;EGFR
FAS pathway and stress induction of heat shock protein regulation	5/39	0.806361	0.999995	0.729454	0.156996	DFFB;MAP2K4;CASP6;FASLG;PTPN13
Alpha-6 beta-1 and alpha-6 beta-4 integrin signaling	6/46	0.806471	0.999995	0.743996	0.160024	RXRA;PMP22;PRKCA;PIK3R1;RAC1;EGFR
RhoA activity regulation	6/46	0.806471	0.999995	0.743996	0.160024	VAV3;CDKN1B;TRIO;ARHGEF25;ARHGEF18;ARAP1
Protein folding	7/53	0.807959	0.999995	0.754732	0.160942	VBP1;USP11;FBXO4;TBCB;TBCA;PFDN5;PFDN6
Starch and sucrose metabolism	7/53	0.807959	0.999995	0.754732	0.160942	PYGB;AMY2A;AMY2B;AMY1A;AMY1B;AMY1C;GUSB
AKT phosphorylation of nuclear targets	1/9	0.808414	0.999995	0.620265	0.131919	RPS6KB2
Adrenoceptors	1/9	0.808414	0.999995	0.620265	0.131919	ADRA1B
Benzo(a)pyrene metabolism	1/9	0.808414	0.999995	0.620265	0.131919	AKR1A1
Calcium/calmodulin-dependent protein kinase activation	1/9	0.808414	0.999995	0.620265	0.131919	CALM3
Gene expression regulation by hypoxia-inducible factor	1/9	0.808414	0.999995	0.620265	0.131919	ARNT
Phenylalanine and tyrosine catabolism	1/9	0.808414	0.999995	0.620265	0.131919	PCBD1
Pyrimidine salvage reactions	1/9	0.808414	0.999995	0.620265	0.131919	UCK1
Sodium/calcium exchangers	1/9	0.808414	0.999995	0.620265	0.131919	SLC8A3
Sodium/proton exchangers	1/9	0.808414	0.999995	0.620265	0.131919	SLC9A6
Alanine, aspartate and glutamate metabolism	4/32	0.808583	0.999995	0.708657	0.15057	ADSL;CAD;GOT2;NIT2
Fibrin clot formation (clotting cascade)	4/32	0.808583	0.999995	0.708657	0.15057	F10;FGG;SERPING1;PRCP
Hypothetical network for drug addiction	4/32	0.808583	0.999995	0.708657	0.15057	NISCH;KRIT1;DRD4;GRIN1
Prothrombin activation intrinsic pathway	4/32	0.808583	0.999995	0.708657	0.15057	F10;FGG;SERPING1;PRCP
Serotonin HTR1 group and FOS pathway	4/32	0.808583	0.999995	0.708657	0.15057	PDPK1;HTR1B;RASGRP1;GNAI2
Syndecan 4 pathway	4/32	0.808583	0.999995	0.708657	0.15057	CXCL12;MDK;PRKCA;RAC1
BDNF signaling pathway	39/261	0.809184	0.999995	0.870376	0.184284	ABCB1;CRABP2;IGSF3;NUMA1;TWF2;GATA3;GATA2;ADD3;CLU;PTGS1;PSMB4;RIMS3;C7;PEG10;DPYSL3;SSR1;EIF4B;JAM3;DDX17;PDGFRA;PNISR;IGFBP5;ATP6AP1;IGFBP4;TUBB;RPS6;RPSA;CBFA2T2;GPRC5B;MARCKS;CXCL12;NFIB;P4HA2;CARM1;CDH11;PPIE;ADNP;ROR2;NUCB2
RAGE pathway	8/60	0.810296	0.999995	0.762978	0.160497	BACE1;CDKN1B;ID1;PDGFB;IGF1;BMP7;ABCG1;PTGES
Basigin interactions	3/25	0.815046	0.999995	0.676487	0.138349	SPN;SLC7A8;SLC7A10
IGF1 receptor signaling through beta-arrestin	3/25	0.815046	0.999995	0.676487	0.138349	ARRB1;IGF1;IGF1R
Metal ion solute carrier family (SLC) transporters	3/25	0.815046	0.999995	0.676487	0.138349	HEPH;SLC40A1;SLC39A3
TPO signaling pathway	3/25	0.815046	0.999995	0.676487	0.138349	RASA1;PRKCA;PIK3R1
Cell surface interactions at the vascular wall	13/94	0.815431	0.999995	0.795744	0.162362	PIK3R2;PIK3R1;SLC7A10;SPN;CD2;COL1A1;COL1A2;SLC7A8;SIRPA;FYN;CD47;GAS6;JAM3
L1CAM interactions	13/94	0.815431	0.999995	0.795744	0.162362	CSNK2A2;CLTA;AP2B1;DNM1;EGFR;DPYSL2;RPS6KA2;CSNK2B;AP2S1;CNTN1;RAC1;CD24;SPTBN1
Seven transmembrane receptor signaling through beta-arrestin	10/74	0.816375	0.999995	0.774802	0.157193	ACTA2;MAP2K4;GRK5;PDE1B;PDE1A;PDE5A;PDE7B;PDE7A;MAP3K4;MAP2K5
Arginine and proline metabolism	7/54	0.823304	0.999995	0.738629	0.143611	GAMT;GATM;P4HA2;GOT2;SAT2;CKB;ALDH7A1
Non-small cell lung cancer	7/54	0.823304	0.999995	0.738629	0.143611	RXRA;PDPK1;CDK4;PRKCA;PIK3R2;PIK3R1;EGFR
Nuclear signaling by ErbB4	5/40	0.82405	0.999995	0.70857	0.137125	APH1A;CXCL12;ESR1;SH2B1;RBX1
CD8/T cell receptor downstream pathway	9/68	0.826715	0.999995	0.756419	0.143943	EOMES;PPP3R1;IL2RB;NFATC3;CD3G;FASLG;PRKCA;CALM3;CD3D
Epithelial cell signaling in Helicobacter pylori infection	9/68	0.826715	0.999995	0.756419	0.143943	MAP2K4;ATP6V1G1;ATP6AP1;RAC1;ATP6V1E1;EGFR;ATP6V1C1;ATP6V0A1;JAM3
PIP biosynthesis at the plasma membrane	4/33	0.827718	0.999995	0.684179	0.129366	MTMR14;INPPL1;PIK3R2;PIK3R1
Fatty acyl-CoA biosynthesis	2/18	0.830175	0.999995	0.620152	0.115422	ELOVL4;ELOVL6
Pre-NOTCH processing in Golgi	2/18	0.830175	0.999995	0.620152	0.115422	ST3GAL6;RFNG
Tie2 signaling	2/18	0.830175	0.999995	0.620152	0.115422	PIK3R2;PIK3R1
Transcriptional activity regulation by PML	2/18	0.830175	0.999995	0.620152	0.115422	UBE2I;FASLG
Acyl chain remodelling of phosphatidylcholine	3/26	0.835806	0.999995	0.647036	0.116052	PLA2G4B;PLBD1;PLA2G5
Galactose metabolism	3/26	0.835806	0.999995	0.647036	0.116052	GALT;AKR1B1;GALK2
Tetrasaccharide linker sequence formation in glycosaminoglycan biosynthesis	3/26	0.835806	0.999995	0.647036	0.116052	SDC2;GPC4;DCN
RNA polymerase I transcription	7/55	0.83767	0.999995	0.723197	0.128101	ERCC3;TAF1C;ERCC2;UBTF;POLR1D;ERCC6;GTF2H4
TAp63 pathway	7/55	0.83767	0.999995	0.723197	0.128101	ITCH;SMARCD3;SP1;OGG1;CABLES1;SSRP1;DHRS3
Colorectal cancer	8/62	0.838214	0.999995	0.734631	0.129649	TCF7L2;SMAD4;TCF7L1;PIK3R2;RAC1;AXIN2;PIK3R1;MLH1
Fc epsilon receptor I signaling in mast cells	5/41	0.840408	0.999995	0.688846	0.119768	MAP2K4;NFATC3;CALM3;PIK3R1;MS4A2
Plasma membrane estrogen receptor signaling	5/41	0.840408	0.999995	0.688846	0.119768	MMP2;PIK3R1;ESR1;GNAI2;IGF1R
Activation of calcium-permeable kainate receptor	1/10	0.840557	0.999995	0.551314	0.0957579	NCALD
Androgen biosynthesis	1/10	0.840557	0.999995	0.551314	0.0957579	SRD5A1
Cdc25 and Chk1 regulatory pathway in response to DNA damage	1/10	0.840557	0.999995	0.551314	0.0957579	ATM
DCC role in regulating apoptosis	1/10	0.840557	0.999995	0.551314	0.0957579	DAPK2
Glycoprotein 1b-IX-V activation signaling	1/10	0.840557	0.999995	0.551314	0.0957579	PIK3R1
IKK complex recruitment mediated by RIP1	1/10	0.840557	0.999995	0.551314	0.0957579	TICAM2
Interferon-alpha signaling pathway	1/10	0.840557	0.999995	0.551314	0.0957579	ST13
NODAL signaling regulation	1/10	0.840557	0.999995	0.551314	0.0957579	ACVR2A
Nef-mediated downregulation of MHC class I complex cell surface expression	1/10	0.840557	0.999995	0.551314	0.0957579	AP1S1
Netrin mediated repulsion signals	1/10	0.840557	0.999995	0.551314	0.0957579	FYN
Ran role in mitotic spindle regulation	1/10	0.840557	0.999995	0.551314	0.0957579	NUMA1
Reduction of cytosolic calcium levels	1/10	0.840557	0.999995	0.551314	0.0957579	SLC8A3
Second messenger role in netrin-1 signaling	1/10	0.840557	0.999995	0.551314	0.0957579	TRPC1
TRAF6-mediated IRF7 activation in TLR7/8 or 9 signaling	1/10	0.840557	0.999995	0.551314	0.0957579	TLR7
Zinc influx into cells by the SLC39 gene family	1/10	0.840557	0.999995	0.551314	0.0957579	SLC39A3
Gap junction pathway	12/90	0.845787	0.999995	0.762694	0.127742	PDGFRB;PDGFRA;TUBB;PDGFD;LPAR1;PDGFB;PRKG2;ADCY3;PRKCA;EGFR;MAP2K5;GNAI2
Interleukin-4 regulation of apoptosis	39/267	0.850085	0.999995	0.847162	0.137595	MCM7;CITED2;PDGFB;ABHD8;UBE2L6;GATA3;CD1C;MED16;RASGRP1;EGFR;ENOX2;EDNRA;ATXN1;LRRTM2;SNAPC4;TNFSF10;TIMP2;CASP2;ALX1;GBP2;CCDC71;IL13RA1;CCL23;IL10RA;GZMA;PCDH7;NKG7;ZDHHC17;ARHGAP32;MAF;CLEC2B;MCM3;GAS1;MCM4;CYP2E1;TNIK;MCM6;GAS6;MCM2
Cytosolic DNA-sensing pathway	7/56	0.851089	0.999995	0.708396	0.11422	POLR3A;POLR3B;POLR3GL;POLR3C;POLR1D;POLR3H;POLR3K
Thromboxane A2 receptor signaling	7/56	0.851089	0.999995	0.708396	0.11422	PRKCA;FYN;RAC1;DNM1;EGFR;PTGDR;GNAI2
Long-term depression	9/70	0.85152	0.999995	0.73153	0.11758	PPP2R1A;PLA2G4B;JMJD7-PLA2G4B;PRKG2;PRKCA;PLA2G5;IGF1;IGF1R;GNAI2
Signaling events mediated by VEGFR1 and VEGFR2	9/70	0.85152	0.999995	0.73153	0.11758	PRKAA1;PDPK1;PRKAG1;PRKCA;FYN;CALM3;PIK3R1;PRKAB1;NCK1
FoxO family signaling	6/49	0.85243	0.999995	0.691965	0.110482	RBL2;RALA;CDKN1B;XPO1;FASLG;CSNK1G1
Glycerolipid metabolism	6/49	0.85243	0.999995	0.691965	0.110482	LIPC;GLYCTK;AKR1A1;AKR1B1;DGKZ;ALDH7A1
Apoptosis modulation by HSP70	2/19	0.852517	0.999995	0.583638	0.0931262	CASP6;CASP2
GABA biosynthesis, release, reuptake and degradation	2/19	0.852517	0.999995	0.583638	0.0931262	SNAP25;VAMP2
Ras activation upon calcium influx through NMDA receptor	2/19	0.852517	0.999995	0.583638	0.0931262	CALM3;GRIN1
Signaling by NODAL	2/19	0.852517	0.999995	0.583638	0.0931262	SMAD4;ACVR2A
TP53 network	2/19	0.852517	0.999995	0.583638	0.0931262	TNFSF10;ATM
G alpha (12/13) signaling events	10/77	0.852699	0.999995	0.739975	0.117914	VAV3;ARHGEF9;TRIO;ARHGEF18;PIK3R2;RAC1;PIK3R1;ADRA1B;ARHGEF7;FGD1
Small cell lung cancer	11/84	0.854281	0.999995	0.747024	0.117652	PIAS4;PIAS3;CDKN1B;RXRA;CDK4;TRAF5;TRAF2;PIK3R2;PIK3R1;CKS1B;PIAS1
Cooperation of prefoldin and TriC/CCT in actin and tubulin folding	3/27	0.854522	0.999995	0.620039	0.0974778	VBP1;PFDN5;PFDN6
Glycolysis	3/27	0.854522	0.999995	0.620039	0.0974778	PPP2R1A;PPP2R5D;ENO2
Glycosphingolipid biosynthesis: lacto and neolacto series	3/27	0.854522	0.999995	0.620039	0.0974778	ST3GAL6;B3GALT5;FUT4
Mammalian calpain regulation of cell motility	3/27	0.854522	0.999995	0.620039	0.0974778	CAPN1;RAC1;EGFR
Pentose phosphate pathway	3/27	0.854522	0.999995	0.620039	0.0974778	PRPS2;PGLS;DERA
Rev-mediated nuclear export of HIV-1 RNA	3/27	0.854522	0.999995	0.620039	0.0974778	XPO1;NUP85;NUP43
TNF/stress-related signaling	3/27	0.854522	0.999995	0.620039	0.0974778	MAP2K4;CASP2;TRAF2
TWEAK regulation of gene expression	3/27	0.854522	0.999995	0.620039	0.0974778	COL1A1;CXCL12;TNFSF12
T cell receptor regulation of apoptosis	92/603	0.856997	0.999995	0.890537	0.137428	RBM25;CDKN1B;NUDT2;ILK;FASLG;CD3G;LSP1;HMGB1;RPL10A;BMI1;BRCA2;NR3C1;CLU;SPN;RPL7A;RPS14;FBL;SEC61A1;FCGRT;CASP6;MYB;TNFRSF8;CASP2;RAC1;ATP6V1E1;HMGN1;MAP4K1;IGFBP5;VBP1;TUBB;MMP2;RPL13A;NME3;VEZF1;RPS3A;ZDHHC17;RRAGA;PAX8;NME6;EWSR1;DAD1;TRAF5;PSME1;TRIM13;CD2BP2;TLR7;SNRPC;PTGES;FKBP2;HDAC2;ABCB1;NDUFB7;GPS1;GSTP1;EI24;PRUNE2;COPS7B;GATA3;PRPF8;RASGRP1;MRPL11;GNAI2;BCL2L12;PRDX4;TAF1C;PRDX1;RPL…
Calcium signaling pathway	25/178	0.860576	0.999995	0.809533	0.121554	PTGFR;PDE1B;PDE1A;ADCY3;ADRA1B;EGFR;EDNRA;PPP3R1;PHKG2;CHP1;PDGFRB;PDGFRA;SPHK2;TRPC1;TNNC2;PRKCA;PHKA2;GRIN1;P2RX7;SLC8A3;P2RX4;AGTR1;VDAC3;CALM3;PLCD1
Integrated cancer pathway	4/35	0.861224	0.999995	0.639961	0.095611	CDK4;CHEK2;NOXA1;ATM
Interleukin-7 signaling pathway	4/35	0.861224	0.999995	0.639961	0.095611	CDKN1B;PIK3R2;FYN;PIK3R1
Prion diseases	4/35	0.861224	0.999995	0.639961	0.095611	C5;C6;C7;FYN
Interleukin-6 signaling pathway	9/71	0.862821	0.999995	0.719688	0.106189	NCOA1;MAP2K4;PIAS3;FGG;MITF;PIK3R2;RAC1;PIK3R1;PIAS1
Mitochondrial pathway of apoptosis: multidomain Bcl-2 family	9/71	0.862821	0.999995	0.719688	0.106189	UBL4A;XRCC6;DAPK2;CAPN5;CAPN3;HTRA2;PRKCA;PARK7;CAPN1
PI3K cascade	7/57	0.863597	0.999995	0.694186	0.101802	KL;FGF7;CDKN1B;PDPK1;RPS6KB2;MLST8;PIK3R1
Pathogenic Escherichia coli infection	7/57	0.863597	0.999995	0.694186	0.101802	TUBB;ARPC1A;PRKCA;FYN;ARPC5;TLR5;NCK1
Pre-NOTCH expression and processing	7/57	0.863597	0.999995	0.694186	0.101802	MOV10;KAT2A;AGO1;ST3GAL6;RFNG;TNRC6A;TNRC6B
TGF-beta signaling pathway	26/185	0.863788	0.999995	0.810092	0.11862	TGFB1I1;PIK3R2;PIK3R1;STAMBPL1;DACT2;RAC1;ZNF423;SPTBN1;EIF2A;MAP4K1;MAP2K4;TRAP1;MEF2C;SMAD4;UBE2I;PDPK1;SMAD5;PIAS1;RBX1;RBL2;TGFBR3;DAB2;ITCH;SP1;DYNLRB1;TAB1
p53 signaling pathway	19/139	0.864862	0.999995	0.784593	0.113911	HDAC2;PCNA;TRRAP;NFYB;CSE1L;MMP2;NFYC;ARID3A;RCHY1;MLH1;PRKAB1;EGFR;PIDD1;KAT2A;SP1;CASP6;CARM1;TP53INP1;CCNG1
Alpha-linolenic (omega3) and linoleic (omega6) acid metabolism	1/11	0.867309	0.999995	0.496153	0.0706323	ABCD1
Down syndrome cell adhesion molecule (DSCAM) interactions	1/11	0.867309	0.999995	0.496153	0.0706323	RAC1
Hormone ligand-binding G-protein coupled receptors	1/11	0.867309	0.999995	0.496153	0.0706323	GNRH1
Mechanism of protein import into the nucleus	1/11	0.867309	0.999995	0.496153	0.0706323	NUP62
Notch receptor processing	1/11	0.867309	0.999995	0.496153	0.0706323	APH1A
Recycling of bile acids and salts	1/11	0.867309	0.999995	0.496153	0.0706323	ABCB11
Regulated proteolysis of p75 neurotrophin receptor	1/11	0.867309	0.999995	0.496153	0.0706323	APH1A
Serotonin transporter activity	1/11	0.867309	0.999995	0.496153	0.0706323	TGFB1I1
Sonic Hedgehog (SHH) receptor PTCH1 regulation of cell cycle	1/11	0.867309	0.999995	0.496153	0.0706323	XPO1
Vitamin C in the brain	1/11	0.867309	0.999995	0.496153	0.0706323	SLC23A2
eIF2 regulation	1/11	0.867309	0.999995	0.496153	0.0706323	EIF2S3
p38 gamma/delta MAPK pathway	1/11	0.867309	0.999995	0.496153	0.0706323	EEF2K
Type 1 diabetes mellitus	5/43	0.869366	0.999995	0.652512	0.0913456	HLA-DMA;HLA-DMB;PTPRN2;CPE;FASLG
Multi-step regulation of transcription by PITX2	3/28	0.871345	0.999995	0.595201	0.0819694	TRRAP;PPP2R5D;PITX2
Acute myocardial infarction	2/20	0.872145	0.999995	0.55118	0.0754015	F10;FGG
Chondroitin sulfate biosynthesis	2/20	0.872145	0.999995	0.55118	0.0754015	CHST12;DCN
Estrogen receptor signaling pathway	2/20	0.872145	0.999995	0.55118	0.0754015	SP1;ESR1
GATA3-mediated activation of Th2 cytokine expression	2/20	0.872145	0.999995	0.55118	0.0754015	MAF;GATA3
ID regulation of gene expression	2/20	0.872145	0.999995	0.55118	0.0754015	MMP2;ARFGAP2
N-glycan antennae elongation in the medial/trans-Golgi	2/20	0.872145	0.999995	0.55118	0.0754015	FUT8;MGAT4B
ERK1/ERK2 MAPK pathway	8/65	0.873887	0.999995	0.69584	0.0938024	PDGFRA;EEF2K;RPS6KA2;RPS6KB2;EIF4EBP1;PPP2R5D;EGFR;IGF1R
HIV-1 Nef as negative effector of Fas and TNF	7/58	0.875229	0.999995	0.680533	0.0906943	DFFB;NUMA1;CASP6;RASA1;CASP2;FASLG;TRAF2
Tryptophan metabolism	7/58	0.875229	0.999995	0.680533	0.0906943	RNF25;UBE3A;CYP2E1;HADH;ALDH7A1;CYP4F12;ACAT1
Neurotransmitter release cycle	4/36	0.875777	0.999995	0.619925	0.0822294	SNAP25;SLC17A7;SLC18A2;VAMP2
Integrin-mediated cell adhesion	13/100	0.876512	0.999995	0.740597	0.0976142	VAV3;PDPK1;ILK;PIK3R2;CAPN5;ITGA11;CAPN3;FYN;CAPN1;RAC1;ARHGEF7;DOCK1;MAP2K5
Glutathione metabolism	6/51	0.877791	0.999995	0.661131	0.0861765	RRM1;GSTA4;GSTP1;IDH2;GPX7;TXNDC12
G-protein-mediated events	5/44	0.882097	0.999995	0.635743	0.0797561	PDE1B;PDE1A;ADCY3;PRKCA;GNAI2
Heart development	5/44	0.882097	0.999995	0.635743	0.0797561	MEF2C;SMAD4;HAND2;NFATC3;PITX2
GnRH signaling pathway	13/101	0.884918	0.999995	0.732137	0.089511	MAP2K4;MMP2;PLA2G4B;ADCY3;PRKCA;PLA2G5;PLD1;EGFR;MMP14;JMJD7-PLA2G4B;GNRH1;CALM3;MAP3K4
CDO in myogenesis	3/29	0.886422	0.999995	0.572275	0.0689946	MEF2C;BOC;MEF2D
Phototransduction	3/29	0.886422	0.999995	0.572275	0.0689946	GUCA1B;ARRB1;CALM3
Sema4D in semaphorin signaling	3/29	0.886422	0.999995	0.572275	0.0689946	RAC1;MYH10;MYL12B
Activation of NMDA receptor upon glutamate binding and postsynaptic events	4/37	0.888989	0.999995	0.601104	0.0707321	PDPK1;RPS6KA2;ADCY3;GRIN1
Heparan sulfate/heparin glycosaminoglycan (HS-GAG) metabolism	6/52	0.889032	0.999995	0.64672	0.0760685	NAGLU;SDC2;GPC4;GUSB;DCN;HS3ST2
Interleukin-2 receptor beta chain in T cell activation	6/52	0.889032	0.999995	0.64672	0.0760685	PCNA;IRS1;PDPK1;IL2RB;FASLG;PIK3R1
Biosynthesis of unsaturated fatty acids	2/21	0.889339	0.999995	0.522139	0.0612349	SCD5;ELOVL6
Nicotine activity on dopaminergic neurons	2/21	0.889339	0.999995	0.522139	0.0612349	DRD4;SLC18A2
Oxidative stress-induced gene expression via Nrf2	2/21	0.889339	0.999995	0.522139	0.0612349	PRKCA;CRYZ
PKC-catalyzed phosphorylation of inhibitory phosphoprotein of myosin phosphatase	2/21	0.889339	0.999995	0.522139	0.0612349	TRIO;PRKCA
Alanine and aspartate metabolism	1/12	0.889573	0.999995	0.451021	0.0527755	GOT2
BMP signaling and regulation	1/12	0.889573	0.999995	0.451021	0.0527755	SMAD4
GABA (A) receptor activation	1/12	0.889573	0.999995	0.451021	0.0527755	ARHGEF9
Hormone-sensitive lipase (HSL)-mediated triacylglycerol hydrolysis	1/12	0.889573	0.999995	0.451021	0.0527755	PPP1CC
Iron metabolism in placenta	1/12	0.889573	0.999995	0.451021	0.0527755	SLC40A1
NF-kappaB activation through FADD/RIP-1 pathway	1/12	0.889573	0.999995	0.451021	0.0527755	RNF135
Opening of calcium channels triggered by depolarization of the presynaptic terminal	1/12	0.889573	0.999995	0.451021	0.0527755	CACNA2D3
Parkin role in the ubiquitin-proteasomal pathway	1/12	0.889573	0.999995	0.451021	0.0527755	UBE2L6
Phospholipase C epsilon pathway	1/12	0.889573	0.999995	0.451021	0.0527755	RAP2B
Platelet endothelial cell adhesion molecule 1 (PECAM1) interactions	1/12	0.889573	0.999995	0.451021	0.0527755	FYN
Serotonin receptors	1/12	0.889573	0.999995	0.451021	0.0527755	HTR1B
MAP kinase signaling pathway	10/81	0.892017	0.999995	0.698118	0.0797743	MAP4K1;MAP2K4;CEBPA;SP1;RPS6KA2;RPS6KB2;TRAF2;RAC1;MAP3K4;MAP2K5
RANKL regulation of apoptosis and immune response	9/74	0.892612	0.999995	0.686347	0.0779712	ZNF33A;CD70;CDK4;CTSK;CIDEB;XRCC1;THBS2;RPL17;ESR1
Signaling by ERBB2	13/102	0.892856	0.999995	0.723867	0.0820355	CDKN1B;CUL5;PDE1B;PDPK1;PDE1A;ADCY3;PRKCA;PIK3R1;EGFR;RPS6KB2;MLST8;FYN;UBA52
Interleukin-3, interleukin-5, and GM-CSF signaling	5/45	0.89375	0.999995	0.619812	0.0696228	IL2RB;INPPL1;PIK3R2;FYN;PIK3R1
Wnt interactions in lipid metabolism and immune response	5/45	0.89375	0.999995	0.619812	0.0696228	UBE2I;GPNMB;RBP1;APOE;AXIN2
CXCR4 signaling pathway	15/116	0.894754	0.999995	0.735902	0.0818372	PDPK1;VPS4B;PRKCA;PIK3R2;CD3G;PIK3R1;CD3D;DNM1;GNAI2;ITCH;CXCL12;ITGA11;MLST8;FYN;RAC1
Vascular smooth muscle contraction	15/116	0.894754	0.999995	0.735902	0.0818372	NPR2;PLA2G4B;ADCY3;PRKCA;MYL6B;PLA2G5;ADRA1B;ACTA2;PPP1CC;EDNRA;JMJD7-PLA2G4B;KCNMA1;AGTR1;KCNMB4;CALM3
Neurotrophic factor-mediated Trk receptor signaling	7/60	0.896029	0.999995	0.654774	0.071883	RASA1;DNAJA3;RAC1;PIK3R1;FRS3;DOCK1;DNM1
Amyotrophic lateral sclerosis (ALS)	6/53	0.899382	0.999995	0.632922	0.06712	PPP3R1;CCS;ALS2;CHP1;RAC1;GRIN1
PI3K pathway	6/53	0.899382	0.999995	0.632922	0.06712	IRS1;PDPK1;RPS6KA2;RPS6KB2;PRKCA;PIK3R1
Asthma	3/30	0.899899	0.999995	0.551046	0.0581205	HLA-DMA;HLA-DMB;MS4A2
Gap junction trafficking and regulation	3/30	0.899899	0.999995	0.551046	0.0581205	DAB2;CLTA;DNM1
Glutamate binding and activation of AMPA receptors and synaptic plasticity	3/30	0.899899	0.999995	0.551046	0.0581205	AP2S1;PRKCA;AP2B1
Heparan sulfate/heparin glycosaminoglycan (HS-GAG) biosynthesis	3/30	0.899899	0.999995	0.551046	0.0581205	SDC2;GPC4;HS3ST2
Inactivation of GSK3 by Akt causes accumulation of beta-catenin in alveolar macrophages	3/30	0.899899	0.999995	0.551046	0.0581205	PDPK1;PPP2R5D;PIK3R1
MicroRNAs in muscle cell differentiation	3/30	0.899899	0.999995	0.551046	0.0581205	MEF2C;PRKCA;MEF2D
Signaling pathway from G-protein families	3/30	0.899899	0.999995	0.551046	0.0581205	NFATC3;PRKCA;CALM3
Tight junction interactions	3/30	0.899899	0.999995	0.551046	0.0581205	CLDN3;CLDN23;CLDN12
Signaling of hepatocyte growth factor receptor	4/38	0.900954	0.999995	0.583389	0.060848	MAP4K1;RASA1;PIK3R1;DOCK1
Trefoil factor initiation of mucosal healing	4/38	0.900954	0.999995	0.583389	0.060848	CASP6;PDPK1;PIK3R1;EGFR
p75 neurotrophin receptor-mediated signaling	16/124	0.902672	0.999995	0.733995	0.0751581	VAV3;HDAC2;TRIO;HDAC3;DIABLO;ARHGEF18;PIK3R1;FGD1;APH1A;ARHGEF9;CASP6;NDN;CASP2;RAC1;ARHGEF7;UBA52
Beta-alanine metabolism	2/22	0.904364	0.999995	0.496002	0.04986	DPYD;ALDH7A1
CCR3 signaling in eosinophils	2/22	0.904364	0.999995	0.496002	0.04986	PRKCA;DECR1
Cytochrome P450 pathway	7/61	0.905277	0.999995	0.64261	0.0639491	CYP27A1;CYP27C1;CYP4V2;CYP2R1;CYP2E1;CYP3A5;CYP4F12
Interleukin-4 signaling pathway	13/104	0.907392	0.999995	0.707872	0.0687911	CEBPA;IRS1;PDPK1;PIK3R2;GATA3;PIK3R1;COL1A1;COL1A2;SP1;MYB;RPS6KB2;IL13RA1;SOCS5
EGFR1 pathway	20/152	0.907495	0.999995	0.750486	0.072848	IGBP1;ADSL;GRN;TUBB;CAD;ARHGAP1;ZNF10;FASLG;ESR1;EGFR;HSD11B2;FGF7;PIK3IP1;CDK4;CDC16;MCM3;CTSH;LUC7L3;GABRE;PDE7A
Cytosolic sulfonation of small molecules	1/13	0.908103	0.999995	0.413411	0.039852	PAPSS1
Downregulation of ERBB2-ERBB3 signaling	1/13	0.908103	0.999995	0.413411	0.039852	UBA52
Interleukin-22 soluble receptor signaling pathway	1/13	0.908103	0.999995	0.413411	0.039852	IL10RA
Irinotecan pathway	1/13	0.908103	0.999995	0.413411	0.039852	CYP3A5
Melanocyte development and pigmentation pathway	1/13	0.908103	0.999995	0.413411	0.039852	MITF
NICD trafficking to the nucleus	1/13	0.908103	0.999995	0.413411	0.039852	KAT2A
Organic anion transporters	1/13	0.908103	0.999995	0.413411	0.039852	SLC17A7
PI3K class IB pathway	1/13	0.908103	0.999995	0.413411	0.039852	PDPK1
Signal attenuation	1/13	0.908103	0.999995	0.413411	0.039852	IRS1
Phospholipase C-mediated cascade	6/54	0.908891	0.999995	0.619698	0.0591996	KL;FGF7;PDE1B;PDE1A;ADCY3;PRKCA
Biological oxidations	18/139	0.910883	0.999995	0.73689	0.0687821	PTGIS;ACSS2;ADH1B;ADH1A;GSTP1;FMO1;MAT1A;MAT2B;CYP4F12;CYP3A5;PAPSS1;PTGS1;CYP27A1;GSTA4;CYP2R1;CYP2E1;ACSS1;PAOX
Amino acid transport across the plasma membrane	3/31	0.911915	0.999995	0.531334	0.0489935	SLC7A8;SLC43A1;SLC7A10
Keratan sulfate/keratin metabolism	3/31	0.911915	0.999995	0.531334	0.0489935	HEXB;OGN;ST3GAL6
PD-1 signaling	3/31	0.911915	0.999995	0.531334	0.0489935	ZAP70;CD3G;CD3D
Stathmin and breast cancer resistance to antimicrotubule agents	3/31	0.911915	0.999995	0.531334	0.0489935	CD2;CD3G;CD3D
Actions of nitric oxide in the heart	5/47	0.914095	0.999995	0.590226	0.0530146	CHRNA1;PDPK1;PRKG2;CALM3;PIK3R1
Agrin in postsynaptic differentiation	5/47	0.914095	0.999995	0.590226	0.0530146	CHRNA1;SP1;RAC1;ARHGEF7;EGFR
Delta Np63 pathway	5/47	0.914095	0.999995	0.590226	0.0530146	TCF7L1;ITCH;COL5A1;ATM;BRCA2
Interleukin-2 signaling pathway	128/847	0.915516	0.999995	0.878923	0.0775806	GALNT11;ARL6IP1;IRS1;NDUFA12;ECI1;INPPL1;RORA;NR3C1;SMC4;TM7SF2;TIAL1;MYB;TNFSF10;CPA3;PIAS4;EOMES;PIAS3;STARD5;RPL21;RPS6;LMTK2;FLT3LG;PRKCA;MYCN;TMX1;WDFY1;KLRF1;HOXB3;FAM8A1;ABCB1;PIK3R2;GATA3;PIK3R1;RASGRP1;DPP4;GRK5;CHST12;BMF;TNFRSF14;NDUFV2;TRAP1;PTPRN2;SRD5A1;ST13;FUCA1;NFATC3;NKG7;DNAJC13;TRPV1;SMAD5;MLLT10;COL1A2;PKIA;KLRD1;BRWD1;DNAL4;LAT;MXD4;RERE;SNAP25;CDKN1B;NUMA1;CITED2;NVL;DDX42;…
Collagen binding in corneal epithelia mediated by Erk and PI-3 Kinase	2/23	0.917463	0.999995	0.472355	0.0406901	FYN;PIK3R1
FGFR ligand binding and activation	2/23	0.917463	0.999995	0.472355	0.0406901	KL;FGF7
Hypoxia and p53 in the cardiovascular system	2/23	0.917463	0.999995	0.472355	0.0406901	ABCB1;ATM
Progesterone-initiated oocyte maturation	2/23	0.917463	0.999995	0.472355	0.0406901	PAQR7;PIN1
Complement and coagulation cascades	8/70	0.91883	0.999995	0.639531	0.0541387	C5;C6;C7;F10;C1R;FGG;SERPING1;SERPINA5
Renal cell carcinoma	8/70	0.91883	0.999995	0.639531	0.0541387	CUL2;PDGFB;ARNT;PIK3R2;RAC1;PIK3R1;VHL;RBX1
Negative regulation of FGFR signaling	4/40	0.921511	0.999995	0.550912	0.045032	KL;FGF7;PPP2R1A;UBA52
PAC1 receptor pathway	4/40	0.921511	0.999995	0.550912	0.045032	PLCL2;ADCY3;PRKCA;PLCD1
Integrin signaling pathway	20/155	0.923419	0.999995	0.733675	0.0584533	MAP2K4;LRPAP1;RALA;ARPC1A;ILK;ARPC5;MYL12B;ACTA2;RHOT2;RHOT1;CAPN5;TSPAN4;CAPN3;FYN;CAPN1;RAC1;ARHGEF7;DOCK1;MAP3K4;MAP2K5
Acetylcholine binding and downstream events	1/14	0.923524	0.999995	0.381587	0.0303587	CHRNA1
Adhesion and diapedesis of lymphocytes	1/14	0.923524	0.999995	0.381587	0.0303587	CD34
Initiation of the second proteolytic cleavage of Notch receptor by receptor-ligand binding	1/14	0.923524	0.999995	0.381587	0.0303587	UBA52
Interferon gamma signaling regulation	1/14	0.923524	0.999995	0.381587	0.0303587	PIAS1
S1P/S1P4 pathway	1/14	0.923524	0.999995	0.381587	0.0303587	GNAI2
Signaling by NOTCH2	1/14	0.923524	0.999995	0.381587	0.0303587	APH1A
T cell receptor/Ras pathway	1/14	0.923524	0.999995	0.381587	0.0303587	PRKCA
TRAF3-dependent IRF activation pathway	1/14	0.923524	0.999995	0.381587	0.0303587	RNF135
Visual signal transduction	1/14	0.923524	0.999995	0.381587	0.0303587	ARRB1
Phosphatidylinositol signaling system	9/78	0.923774	0.999995	0.646403	0.0512521	CDS1;INPP5B;INPPL1;PRKCA;PIK3R2;CALM3;PIK3R1;DGKZ;PLCD1
Dilated cardiomyopathy	12/100	0.926568	0.999995	0.675616	0.0515281	PRKAB2;PRKAA1;SGCD;TPM1;ITGA11;CACNA2D3;PRKAG1;ADCY3;CACNA2D4;IGF1;PRKAB1;TTN
Inhibition of cellular proliferation by Gleevec	2/24	0.92886	0.999995	0.450857	0.0332721	MAP2K4;PIK3R1
Nicotinate and nicotinamide metabolism	2/24	0.92886	0.999995	0.450857	0.0332721	NT5C;NT5E
Signal transduction of S1P receptor	2/24	0.92886	0.999995	0.450857	0.0332721	SPHK2;GNAI2
TAK1 activates NF-kappaB by phosphorylation and activation of IKK complex	2/24	0.92886	0.999995	0.450857	0.0332721	HMGB1;TAB1
Endothelins	7/64	0.928907	0.999995	0.608678	0.0448879	EDNRA;COL3A1;COL1A2;ADCY3;PRKCA;RAC1;GNAI2
Alpha-M beta-2 integrin signaling	4/41	0.930279	0.999995	0.53599	0.0387366	MMP2;FYN;HMGB1;JAM3
Bioactive peptide-induced signaling pathway	4/41	0.930279	0.999995	0.53599	0.0387366	FYN;PRKCA;CALM3;PIK3R1
Graft-versus-host disease	4/41	0.930279	0.999995	0.53599	0.0387366	HLA-DMA;HLA-DMB;FASLG;KLRD1
Syndecan 2 pathway	3/33	0.932093	0.999995	0.495852	0.0348696	SDC2;MMP2;RASA1
Melanogenesis	12/101	0.932183	0.999995	0.667985	0.0469099	TCF7L2;TCF7L1;FZD2;MC1R;WNT5B;ASIP;DVL2;ADCY3;MITF;PRKCA;CALM3;GNAI2
Retinol metabolism	7/65	0.935548	0.999995	0.598148	0.0398506	ADH1B;ADH1A;RDH16;BCO1;CYP3A5;DHRS3;DHRS4
Adhesion and diapedesis of granulocytes	1/15	0.936357	0.999995	0.35431	0.0232987	C5
Cyclin A/B1-associated events during G2/M transition	1/15	0.936357	0.999995	0.35431	0.0232987	XPO1
Cytochrome P450 metabolism of endogenous sterols	1/15	0.936357	0.999995	0.35431	0.0232987	CYP27A1
Erythrocyte differentiation pathway	1/15	0.936357	0.999995	0.35431	0.0232987	IGF1
Fibrinolysis pathway	1/15	0.936357	0.999995	0.35431	0.0232987	FGG
Glycosaminoglycan biosynthesis: keratan sulfate	1/15	0.936357	0.999995	0.35431	0.0232987	FUT8
Stress induction of HSP regulation	1/15	0.936357	0.999995	0.35431	0.0232987	FASLG
Terpenoid backbone biosynthesis	1/15	0.936357	0.999995	0.35431	0.0232987	ACAT1
Bladder cancer	4/42	0.938151	0.999995	0.521854	0.0333174	CDK4;DAPK2;MMP2;EGFR
TWEAK signaling pathway	4/42	0.938151	0.999995	0.521854	0.0333174	TNFSF12;TRAF5;TRAF2;RAC1
Focal adhesion	31/233	0.938291	0.999995	0.759429	0.0483722	PDGFB;TESK2;ILK;PIK3R2;PIK3R1;THBS2;EGFR;MYL12B;IGF1R;THBS3;PPP1CC;PDGFD;FYN;RAC1;CAPN1;MAP2K5;VAV3;PDGFRB;PDGFRA;PDPK1;PRKCA;IGF1;COL1A1;COL3A1;COL1A2;COL5A1;COL6A2;ITGA11;COL6A1;COL6A3;DOCK1
Alpha-9 beta-1 integrin pathway	2/25	0.938757	0.999995	0.431229	0.0272532	RAC1;PAOX
Glutathione conjugation	2/25	0.938757	0.999995	0.431229	0.0272532	GSTA4;GSTP1
Maturity onset diabetes of the young	2/25	0.938757	0.999995	0.431229	0.0272532	HHEX;BHLHA15
PIP2 hydrolysis	2/25	0.938757	0.999995	0.431229	0.0272532	RASGRP1;DGKZ
Phosphoinositides and their downstream targets	2/25	0.938757	0.999995	0.431229	0.0272532	PDPK1;RAC1
EGF receptor transactivation by GPCRs in cardiac hypertrophy	3/34	0.940499	0.999995	0.479828	0.0294351	EDNRA;PRKCA;EGFR
MAPK/TRK pathway	3/34	0.940499	0.999995	0.479828	0.0294351	MEF2C;TRPV1;MAP2K5
Toll receptor cascades	20/159	0.941047	0.999995	0.71239	0.0432863	MAP2K4;MEF2C;TICAM2;UBE2I;UNC93B1;UBE2E3;UBE2L6;PPP2R5D;HMGB1;ECSIT;DNM1;TIRAP;PPP2R1A;RPS6KA2;CTSK;TLR7;TAB1;PPARA;TLR5;UBA52
Glycosaminoglycan metabolism	13/110	0.941499	0.999995	0.663845	0.0400178	SDC2;HEXB;ABCC5;DCN;HS3ST2;NAGLU;CHST12;OGN;UST;ST3GAL6;CHST14;GPC4;GUSB
Malaria	5/51	0.944751	0.999995	0.538772	0.0306203	GYPC;KLRB1;SDC2;THBS2;THBS3
Type I interferon (interferon-alpha/beta) pathway	5/51	0.944751	0.999995	0.538772	0.0306203	PTPRT;PTPRD;PTPRA;PTPRO;PTPN13
Salivary secretion	10/89	0.944913	0.999995	0.62712	0.035534	AMY1A;AMY1B;AMY1C;KCNMA1;PRKG2;ADCY3;PRKCA;CALM3;ADRA1B;VAMP2
Growth hormone receptor signaling	4/43	0.945206	0.999995	0.508442	0.0286521	IRS1;PRKCA;PIK3R1;SH2B1
Platelet homeostasis	9/82	0.946821	0.999995	0.610836	0.0333791	SLC8A3;PPP2R1A;PDE1B;PDE1A;KCNMA1;PRKG2;KCNMB4;PPP2R5D;PDE5A
Regular glucocorticoid receptor pathway	9/82	0.946821	0.999995	0.610836	0.0333791	NCOA1;HDAC2;SMARCC2;TBP;POU2F1;FGG;GATA3;NR3C1;PCK2
Acetylation and deacetylation of RelA in the nucleus	1/16	0.947038	0.999995	0.330669	0.0179938	HDAC3
Amino acid biosynthesis and interconversion (transamination)	1/16	0.947038	0.999995	0.330669	0.0179938	GOT2
Rap1 signaling	1/16	0.947038	0.999995	0.330669	0.0179938	RASGRP1
Serotonin receptor 2 and ELK-SRF/GATA4 signaling	1/16	0.947038	0.999995	0.330669	0.0179938	RASGRP1
p75 neurotrophin receptor signaling via NF-kB	1/16	0.947038	0.999995	0.330669	0.0179938	UBA52
SIDS susceptibility pathways	7/67	0.947207	0.999995	0.57814	0.031357	SP1;CDCA7L;RORA;GATA3;NR3C1;GATA2;PPARGC1A
Glycosaminoglycan biosynthesis: heparan sulfate	2/26	0.947336	0.999995	0.413236	0.0223567	XYLT2;HS3ST2
Interleukin-9 regulation of target genes	2/26	0.947336	0.999995	0.413236	0.0223567	CITED2;GZMA
Physiological and pathological hypertrophy of the heart	2/26	0.947336	0.999995	0.413236	0.0223567	CALM3;RAC1
PIK3C1/AKT pathway	3/35	0.947931	0.999995	0.464805	0.024855	CDKN1B;PDPK1;MLST8
fMLP induced chemokine gene expression in HMC-1 cells	3/35	0.947931	0.999995	0.464805	0.024855	NFATC3;CALM3;RAC1
Thymic stromal lymphopoietin (TSLP) pathway	10/90	0.949586	0.999995	0.619243	0.0320328	PSMB4;PSMC5;PSMA4;SLC44A1;PDCD6;LAMP3;TNFSF4;PSMB1;PSME1;CD276
Signaling events mediated by stem cell factor receptor (c-Kit)	5/52	0.950679	0.999995	0.527277	0.0266691	MAP4K1;PDPK1;PTPRO;MITF;PIK3R1
Natural killer cell receptor signaling pathway	6/60	0.951108	0.999995	0.550644	0.0276024	VAV3;MAP2K4;RAC1;MAP3K4;MAP2K5;LAT
Selenium pathway	6/60	0.951108	0.999995	0.550644	0.0276024	ABCA1;PRDX5;PRDX4;CBS;PRDX1;PTGS1
Fibroblast growth factor receptor pathway	12/105	0.951111	0.999995	0.6391	0.0320347	MAP2K4;FGF7;EEF2K;PDPK1;RPS6KA2;SDC2;TCEAL1;RPS6KB2;PRKCA;PIK3R2;PIK3R1;MAP2K5
ERBB2/ERBB3 signaling events	4/44	0.951517	0.999995	0.495701	0.0246354	CHRNA1;PIK3R2;PIK3R1;RAC1
Drug metabolism: cytochrome P450	9/83	0.951523	0.999995	0.602545	0.0299416	GSTA4;ADH1B;ADH1A;GSTP1;ALDH3B1;FMO1;CYP2E1;FMO4;CYP3A5
Response to elevated platelet cytosolic calcium	9/83	0.951523	0.999995	0.602545	0.0299416	CD63;FGG;PDGFB;SERPING1;PRKCA;IGF1;GAS6;CLU;TTN
Wnt signaling pathway and pluripotency	11/98	0.952346	0.999995	0.626284	0.0305797	TCF7L2;TCF7L1;FZD2;WNT5B;PPP2R1A;CTBP1;DVL2;PRKCA;ZBTB33;AXIN2;PAFAH1B1
G alpha s pathway	14/120	0.953268	0.999995	0.65405	0.0313023	MAP2K4;PYGB;PDE1B;PDE1A;ADCY3;PHKA2;GRK5;PHKG2;PDE5A;RGS12;PDE7B;PDE7A;MAP3K4;MAP2K5
Axon guidance	44/325	0.953329	0.999995	0.774166	0.0370017	ROBO3;TRIO;NTN4;CLTA;EGFR;MYL12B;GNAI2;EFNB1;PPP3R1;DPYSL2;RPS6KA2;DPYSL3;AP2S1;CHP1;FYN;RAC1;SRGAP3;MYH10;SPTBN1;NCK1;TRPC1;CSNK2A2;NFATC3;GFRA1;AP2B1;RGMB;GFRA2;DNM1;COL1A1;ENAH;COL3A1;COL1A2;CXCL12;COL5A1;PTPRA;COL6A2;RASA1;CSNK2B;COL6A1;CNTN1;COL6A3;EVL;CD24;DOCK1
PI3K/PLC/TRK pathway	3/36	0.95449	0.999995	0.450693	0.0209924	PDPK1;PIK3R1;TRPV1
Cell cycle: G2/M checkpoint	2/27	0.954761	0.999995	0.396683	0.0183641	CHEK2;ATM
Oxidative stress	2/27	0.954761	0.999995	0.396683	0.0183641	NFIX;SP1
Cadmium-induced DNA biosynthesis and proliferation in macrophages	1/17	0.955926	0.999995	0.309984	0.0139723	PRKCA
Estrogen metabolism	1/17	0.955926	0.999995	0.309984	0.0139723	ARSD
GRB2-SOS provides linkage to MAPK signaling for integrins	1/17	0.955926	0.999995	0.309984	0.0139723	FGG
Inflammasomes	1/17	0.955926	0.999995	0.309984	0.0139723	P2RX7
Sulfation biotransformation reaction	1/17	0.955926	0.999995	0.309984	0.0139723	PAPSS1
TAK1-mediated activation of p38 MAPK	1/17	0.955926	0.999995	0.309984	0.0139723	TAB1
Unblocking of NMDA receptor, glutamate binding and activation	1/17	0.955926	0.999995	0.309984	0.0139723	GRIN1
Zinc transporters	1/17	0.955926	0.999995	0.309984	0.0139723	SLC39A3
Signaling by FGFR in disease	15/128	0.956213	0.999995	0.657276	0.0294291	KL;CDKN1B;PDE1B;PDPK1;PDE1A;ADCY3;PRKCA;PIK3R1;IL17RD;FRS3;FGF7;PPP2R1A;RPS6KB2;MLST8;UBA52
Phospholipid metabolism	26/205	0.95645	0.999995	0.718706	0.0320013	CDS1;CERK;SLC44A1;HEXB;MTMR14;INPPL1;PIK3R2;PIK3R1;PLA2G5;PLD6;MTMR4;PLD1;PLD3;CEPT1;ARSD;TPTE2;CHKB;CHKA;SPHK2;PLA2G4B;SUMF2;FIG4;GALC;GNPAT;PLBD1;GPD1L
NFAT involvement in hypertrophy of the heart	7/69	0.956946	0.999995	0.559422	0.0246191	MEF2C;PDPK1;HAND2;NFATC3;CALM3;PIK3R1;IGF1
HNF3B pathway	4/45	0.957152	0.999995	0.483582	0.0211774	CEBPA;SP1;NR3C1;HADH
Interleukin-12/STAT4 pathway	4/45	0.957152	0.999995	0.483582	0.0211774	PPP3R1;CD3G;CD3D;ETV5
RhoA signaling pathway	4/45	0.957152	0.999995	0.483582	0.0211774	MAP2K4;CDKN1B;PKN2;PLD1
Cell-cell communication	15/129	0.959508	0.999995	0.651471	0.0269283	JUP;ILK;PIK3R2;PIK3R1;CLDN3;CLDN23;CDH11;CLDN12;SIRPA;FYN;RSU1;RAC1;CD47;SPTBN1;NCK1
Allograft rejection	3/37	0.96027	0.999995	0.437411	0.0177332	HLA-DMA;HLA-DMB;FASLG
Platelet aggregation (plug formation)	3/37	0.96027	0.999995	0.437411	0.0177332	PDPK1;FGG;RASGRP1
Shigellosis	6/62	0.96064	0.999995	0.530914	0.0213193	ARPC1A;RAC1;ARPC5;DOCK1;WASF2;ATG5
Kit receptor signaling pathway	5/54	0.960832	0.999995	0.505695	0.0202056	RPS6;MITF;PRKCA;PIK3R2;PIK3R1
CDC42 signaling events	7/70	0.961181	0.999995	0.55051	0.0217959	ENAH;MAP2K4;RAC1;PIK3R1;ARPC5;ARHGEF7;PLD1
Long-term potentiation	7/70	0.961181	0.999995	0.55051	0.0217959	PPP1CC;PPP3R1;RPS6KA2;CHP1;PRKCA;CALM3;GRIN1
PKA activation in glucagon signaling	1/18	0.963323	0.999995	0.291732	0.0109008	ADCY3
Serotonin receptor 4/6/7 and NR3C signaling	1/18	0.963323	0.999995	0.291732	0.0109008	NR3C1
Sodium/chloride-dependent neurotransmitter transporters	1/18	0.963323	0.999995	0.291732	0.0109008	SLC18A2
TNFR2 signaling pathway	1/18	0.963323	0.999995	0.291732	0.0109008	TRAF2
Pancreatic secretion	11/101	0.963395	0.999995	0.605298	0.0225726	CPA3;AMY2A;AMY2B;PLA2G4B;TRPC1;JMJD7-PLA2G4B;KCNMA1;ADCY3;PRKCA;PLA2G5;RAC1
FSH regulation of apoptosis	34/263	0.964496	0.999995	0.734174	0.0265403	CDKN1C;CX3CR1;SDC2;GEMIN2;ARPC1A;GDE1;ARHGAP1;ILK;CLU;PPP3R1;PGRMC1;GRK5;PPP2R1A;ARL6IP5;ZBED1;TLK1;ACP2;APOE;HOXC6;RAB4A;IGFBP5;KIDINS220;IGFBP4;TUBB;TPM1;PHKA2;ESR1;ACTA2;GPRC5B;DAB2;P4HA2;CPE;PPIH;CDK14
Folate metabolism	6/63	0.964741	0.999995	0.521568	0.0187219	ABCA1;SHMT2;CBS;IZUMO1R;MAT1A;FOLR2
Triglyceride biosynthesis	3/38	0.965354	0.999995	0.424888	0.0149819	ELOVL4;ELOVL6;GPD1L
Nucleotide-binding domain, leucine rich repeat containing receptor (NLR) signaling pathways	4/47	0.96665	0.999995	0.461034	0.0156379	P2RX7;ITCH;CASP2;TAB1
Adherens junction actin cytoskeletal organization	2/29	0.966715	0.999995	0.367254	0.0124322	JUP;CDH11
Amine compound SLC transporters	2/29	0.966715	0.999995	0.367254	0.0124322	SLC44A1;SLC18A2
Association of TriC/CCT with target proteins during biosynthesis	2/29	0.966715	0.999995	0.367254	0.0124322	USP11;FBXO4
Leukocyte transendothelial migration	13/117	0.967071	0.999995	0.618902	0.020723	VAV3;MMP2;PRKCA;PIK3R2;PIK3R1;MYL12B;GNAI2;CLDN3;CXCL12;CLDN23;RAC1;CD99;JAM3
Leptin influence on immune response	12/110	0.968146	0.999995	0.606309	0.0196275	ABCA1;COL1A1;CX3CR1;AZGP1;COL1A2;TNFSF12;MMP2;TNFSF10;TNFRSF8;IL16;CD3D;ACAT1
Steroid hormone biosynthesis	5/56	0.969032	0.999995	0.485805	0.0152824	HSD11B2;SRD5A1;HSD17B7;CYP3A5;HSD17B8
Opioid signaling	8/80	0.969079	0.999995	0.550375	0.0172868	PPP3R1;PPP2R1A;PDE1B;PDE1A;ADCY3;PPP2R5D;PRKCA;GNAI2
Class C GPCRs (metabotropic glutamate and pheromone receptors)	1/19	0.969479	0.999995	0.275508	0.00853967	GPRC5B
FRS2-mediated activation	1/19	0.969479	0.999995	0.275508	0.00853967	KIDINS220
G-protein-independent seven transmembrane receptor signaling	1/19	0.969479	0.999995	0.275508	0.00853967	GRK5
MAL role in Rho-mediated activation of SRF	1/19	0.969479	0.999995	0.275508	0.00853967	RAC1
Platelet calcium homeostasis	1/19	0.969479	0.999995	0.275508	0.00853967	SLC8A3
Signaling by FGFR1 fusion mutants	1/19	0.969479	0.999995	0.275508	0.00853967	PIK3R1
FRS2-mediated cascade	3/39	0.969819	0.999995	0.413061	0.0126584	KL;FGF7;FRS3
Intestinal immune network for IgA production	4/48	0.970625	0.999995	0.450529	0.0134325	HLA-DMA;HLA-DMB;CXCL12;TNFSF13
Presenilin action in Notch and Wnt signaling	4/48	0.970625	0.999995	0.450529	0.0134325	APH1A;CTBP1;PPP2R5D;TAB1
TRAF6-mediated IRF7 activation	2/30	0.971487	0.999995	0.354117	0.0102435	RNF135;TRAF2
Tumor necrosis factor (TNF) pathway	2/30	0.971487	0.999995	0.354117	0.0102435	MAP2K4;TRAF2
Chronic myeloid leukemia	7/73	0.971718	0.999995	0.525391	0.0150733	HDAC2;SMAD4;CDKN1B;CTBP1;CDK4;PIK3R2;PIK3R1
Antigen processing and presentation	8/81	0.972077	0.999995	0.542803	0.0153724	PSMB6;HLA-DMA;HLA-DMB;NFYB;NFYC;PSME1;RFXANK;KLRD1
TSH regulation of gene expression	10/97	0.973579	0.999995	0.569179	0.0152406	MEF2C;PAX8;ID1;SORD;ADCY3;PIK3R1;HMGB1;CKB;GFRA2;PPIC
Amino acid and oligopeptide SLC transporters	4/49	0.974154	0.999995	0.440491	0.0115348	SLC7A8;SLC43A1;SLC17A7;SLC7A10
Ceramide signaling pathway	4/49	0.974154	0.999995	0.440491	0.0115348	MAP2K4;SPHK2;MADD;TRAF2
Interleukin-5 signaling pathway	4/49	0.974154	0.999995	0.440491	0.0115348	RPS6;RPS6KB2;PIK3R2;PIK3R1
Toll-like receptor signaling pathway regulation	16/142	0.974424	0.999995	0.628453	0.0162823	RNF31;MAP2K4;TICAM2;SFTPA2;TMED7-TICAM2;PIK3R2;PIK3R1;TIRAP;CTSK;MLST8;SARM1;TLR7;TAB1;RAC1;SFTPA1;TLR5
Amoebiasis	11/105	0.974554	0.999995	0.579401	0.0149345	COL1A1;RAB5B;COL3A1;COL1A2;COL5A1;PRKCA;PIK3R2;CTSG;PIK3R1;SERPINB6;RAB7A
Wnt/calcium/cyclic GMP pathway	7/74	0.9746	0.999995	0.517518	0.0133145	PPP3R1;FZD2;WNT5B;PLCL2;NFATC3;PRKCA;PLCD1
4-1BB-dependent immune response	1/20	0.974602	0.999995	0.260992	0.00671425	TRAF2
Hypertrophy pathway	1/20	0.974602	0.999995	0.260992	0.00671425	EIF4EBP1
Nerve growth factor (NGF) pathway	1/20	0.974602	0.999995	0.260992	0.00671425	PIK3R1
Signaling by Hippo	1/20	0.974602	0.999995	0.260992	0.00671425	DVL2
Semaphorin interactions	6/66	0.97481	0.999995	0.4954	0.0126391	DPYSL2;DPYSL3;FYN;RAC1;MYH10;MYL12B
CD40/CD40L signaling	2/31	0.975596	0.999995	0.341885	0.00844692	MAP2K4;TRAF2
Inwardly rectifying potassium channels	2/31	0.975596	0.999995	0.341885	0.00844692	KCNJ8;ABCC9
NF-kappaB activation by non-typeable Hemophilus influenzae	2/31	0.975596	0.999995	0.341885	0.00844692	SMAD4;NR3C1
Arrhythmogenic right ventricular cardiomyopathy (ARVC)	7/75	0.97721	0.999995	0.509877	0.0117544	TCF7L2;TCF7L1;SGCD;JUP;ITGA11;CACNA2D3;CACNA2D4
Granule cell survival pathway	10/99	0.978202	0.999995	0.556321	0.0122608	MAP2K4;MYCN;PLAGL1;PLCL2;ADCY3;POLR2G;CYC1;MAP3K4;MAP2K5;PLCD1
Cytosolic sensors of pathogen-associated DNA	1/21	0.978865	0.999995	0.247927	0.00529604	HMGB1
Prion pathway	1/21	0.978865	0.999995	0.247927	0.00529604	RPSA
p38 MK2 pathway	1/21	0.978865	0.999995	0.247927	0.00529604	LSP1
Natural killer cell-mediated cytotoxicity	15/137	0.978903	0.999995	0.608457	0.0129737	VAV3;NFATC3;PRKCA;PIK3R2;FASLG;PIK3R1;ZAP70;PPP3R1;NCR3;TNFSF10;CHP1;KLRD1;FYN;RAC1;LAT
Amine ligand-binding G-protein coupled receptors	3/42	0.980168	0.999995	0.381218	0.00763619	HTR1B;ADRA1B;DRD4
Epstein-Barr virus LMP1 signaling	1/22	0.982413	0.999995	0.236107	0.00418938	PDLIM7
T cell receptor downstream signaling	1/22	0.982413	0.999995	0.236107	0.00418938	PDPK1
PI3K class IB pathway in neutrophils	3/43	0.98279	0.999995	0.371665	0.00645188	PRKCA;RAC1;PLD1
FGF signaling pathway	5/61	0.983088	0.999995	0.442296	0.00754387	KL;PDPK1;SDC2;PIK3R1;IL17RD
ERBB signaling pathway	9/94	0.98352	0.999995	0.524221	0.00871106	MAP2K4;CDKN1B;RPS6KB2;EIF4EBP1;PRKCA;PIK3R2;PIK3R1;EGFR;NCK1
Integration of energy metabolism	13/125	0.9837	0.999995	0.574416	0.00943992	SNAP25;TCF7L2;PRKAB2;ADCY3;PRKCA;PPP2R5D;GNAI2;DPP4;MARCKS;SPCS1;PPP2R1A;SEC11A;VAMP2
Cell adhesion molecules (CAMs)	14/133	0.984351	0.999995	0.582142	0.009182	SDC2;GLG1;SPN;CD2;HLA-DMA;CLDN3;HLA-DMB;CLDN23;CNTN1;CD34;CD99;MPZL1;CD276;JAM3
EPO receptor signaling	2/34	0.984767	0.999995	0.309778	0.00475514	IRS1;RASA1
Ephrin receptor A forward pathway	2/34	0.984767	0.999995	0.309778	0.00475514	VAV3;FYN
Interleukin-7 interactions in immune response	2/34	0.984767	0.999995	0.309778	0.00475514	CXCL12;FASTK
Monoamine transport	2/34	0.984767	0.999995	0.309778	0.00475514	RBL2;TGFB1I1
Gastrin pathway	3/44	0.985079	0.999995	0.362578	0.00545091	SREBF1;CTNNBIP1;LAMTOR3
G-protein signaling pathways	9/95	0.985136	0.999995	0.518094	0.00775889	AKAP11;PDE1B;PDE1A;ADCY3;PRKCA;CALM3;PDE7B;PDE7A;GNAI2
Modulation of interferon signaling by chaperones	1/23	0.985365	0.999995	0.225361	0.0033225	DNAJA3
Proximal tubule bicarbonate reclamation	1/23	0.985365	0.999995	0.225361	0.0033225	PCK2
Rho cell motility signaling pathway	1/23	0.985365	0.999995	0.225361	0.0033225	ARHGAP1
Signaling events mediated by PRL	1/23	0.985365	0.999995	0.225361	0.0033225	RAC1
Th1/Th2 differentiation pathway	1/23	0.985365	0.999995	0.225361	0.0033225	GATA3
Visual signal transduction: cones	1/23	0.985365	0.999995	0.225361	0.0033225	GUCA1B
Visual signal transduction: rods	1/23	0.985365	0.999995	0.225361	0.0033225	GUCA1B
Viral myocarditis	6/71	0.985887	0.999995	0.457155	0.00649785	HLA-DMA;SGCD;HLA-DMB;FYN;RAC1;MYH10
Binding of chemokines to chemokine receptors	4/54	0.986565	0.999995	0.396322	0.00536088	CX3CR1;CXCL12;ACKR4;CXCR6
Hematopoietic cell lineage	8/88	0.986657	0.999995	0.495099	0.00665067	CD2;IL11RA;FLT3LG;CD3G;CD1C;CD24;CD3D;CD34
Deposition of new CENP-A-containing nucleosomes at the centromere	3/45	0.987073	0.999995	0.353924	0.00460486	MIS18BP1;RBBP7;CENPQ
G alpha (z) signaling events	3/45	0.987073	0.999995	0.353924	0.00460486	ADCY3;PRKCA;GNAI2
Sphingolipid metabolism	6/72	0.987464	0.999995	0.450201	0.00567941	GALC;CERK;SPHK2;HEXB;ARSD;SUMF2
NF-kappaB signaling pathway	1/24	0.987822	0.999995	0.21555	0.00264111	TAB1
Plexin D1 signaling	1/24	0.987822	0.999995	0.21555	0.00264111	ITGA11
Meiotic synapsis	4/55	0.988244	0.999995	0.388528	0.00459468	DIDO1;ACD;UBE2I;STAG2
Ion transport by P-type ATPases	2/36	0.988912	0.999995	0.29152	0.00325049	ATP8B4;ATP8B2
Signaling to ERKs	2/36	0.988912	0.999995	0.29152	0.00325049	RALA;KIDINS220
Adrenergic pathway	14/137	0.989086	0.999995	0.563074	0.00617935	PDE1B;PDE1A;PLCL2;AKR1B1;ADCY3;PRKCA;PHKA2;EGFR;GRK5;PDE5A;RGS12;PDE7B;PDE7A;PLCD1
Ck1/Cdk5 regulation by type 1 glutamate receptors	1/25	0.989866	0.999995	0.206556	0.00210388	PPP2R5D
Ligand-gated ion channel transport	1/25	0.989866	0.999995	0.206556	0.00210388	ARHGEF9
SHC1 events in ERBB2 signaling	1/25	0.989866	0.999995	0.206556	0.00210388	EGFR
Immune system	141/998	0.991272	0.999995	0.808504	0.00708794	EIF4A2;IRS1;INPPL1;UBE2L6;UBE3A;LGALS3;NPEPPS;CDC23;HERC2;PSMD4;PPP2R1A;RPS6KA2;DHX58;FBXO4;AP1S1;KPNA5;DYNC2H1;MAP2K4;MEF2C;TICAM2;DEFB119;FBXW8;UBE2E3;FBXO17;ATG12;PIAS1;RBX1;PSME1;ANAPC4;ANAPC5;UBA52;ANAPC1;PSMD10;CUL7;UBA7;CUL5;CUL3;CUL2;PIK3R2;PIK3R1;KLHL13;RASGRP1;C5;C6;C7;NUP85;PCBP2;TNFRSF14;PSMF1;ATG5;SEC31A;CDC16;MKRN1;PIN1;BLMH;KLRD1;TAB1;SAE1;LAT;RNF220;DET1;CDKN1B;PRKCSH;SH3KBP1;CLTA…
Ascorbate and aldarate metabolism	1/26	0.991567	0.999995	0.198282	0.00167913	ALDH7A1
Inhibition of activated T cell apoptosis by neuropeptides VIP and PACAP	1/26	0.991567	0.999995	0.198282	0.00167913	CALM3
Integrin family cell surface interactions	1/26	0.991567	0.999995	0.198282	0.00167913	ITGA11
Interaction between L1-type proteins and ankyrins	1/26	0.991567	0.999995	0.198282	0.00167913	SPTBN1
Interleukin-27-mediated signaling events	1/26	0.991567	0.999995	0.198282	0.00167913	GATA3
Cell junction organization	7/84	0.991736	0.999995	0.450037	0.00373458	CLDN3;JUP;CLDN23;CDH11;CLDN12;ILK;RSU1
Differentiation pathway in PC12 cells	7/84	0.991736	0.999995	0.450037	0.00373458	MAP2K4;PLCL2;ADCY3;MAP3K4;MAP2K5;PLCD1;SH2B1
Signal transduction through IL-1R	2/38	0.991948	0.999995	0.275292	0.00222558	TAB1;ECSIT
TNF-alpha signaling pathway	9/101	0.992123	0.999995	0.484129	0.00382859	MAP2K4;TRAP1;DIABLO;MADD;TRAF2;PTPRCAP;TNIK;TAB1;RAC1
Factors involved in megakaryocyte development and platelet production	12/125	0.992144	0.999995	0.525349	0.00414338	HDAC2;KDM1A;SIN3A;MYB;CABLES1;GATA3;RAC1;GATA2;ZFPM1;DOCK1;CABLES2;SH2B1
Tight junction	13/133	0.992284	0.999995	0.535863	0.00415095	CSNK2A2;PRKCA;TJAP1;MYL12B;GNAI2;CLDN3;PPP2R1A;CDK4;CSNK2B;CLDN23;MYH10;LLGL1;JAM3
Integrin cell surface interactions	7/85	0.992646	0.999995	0.44424	0.00327904	COL1A1;COL1A2;PDPK1;FGG;ITGA11;RASGRP1;JAM3
ADP signalling through P2Y purinoceptor 12	1/27	0.992983	0.999995	0.190644	0.00134248	GNAI2
Aquaporin-mediated transport	3/50	0.993763	0.999995	0.316177	0.00197809	MYO5B;ADCY3;RAB11FIP2
Type 2 diabetes mellitus	3/50	0.993763	0.999995	0.316177	0.00197809	IRS1;PIK3R2;PIK3R1
Actin cytoskeleton regulation	25/226	0.993996	0.999995	0.614418	0.00370007	ARPC1A;PDGFB;BRK1;PIK3R2;PIK3R1;EGFR;FGD1;MYL12B;PPP1CC;FGF7;PDGFD;RAC1;MYH10;WASF2;VAV3;PDGFRB;PDGFRA;RASSF7;ARPC5;SSH3;ENAH;MYL1;ITGA11;ARHGEF7;DOCK1
G-protein activation	1/28	0.994161	0.999995	0.183572	0.00107504	GNAI2
G-protein beta-gamma signalling	1/28	0.994161	0.999995	0.183572	0.00107504	PDPK1
Platelet activation, signaling and aggregation	22/205	0.994495	0.999995	0.593985	0.00327912	VAV3;CD63;PDPK1;FGG;PDGFB;PRKCA;PIK3R2;ARRB1;PIK3R1;IGF1;CLU;DGKZ;RASGRP1;GNAI2;TTN;COL1A1;COL1A2;SERPING1;FYN;RAC1;GAS6;LAT
MAPK signaling pathway	37/314	0.994729	0.999995	0.659172	0.00348347	RALA;PDGFB;ARRB1;FASLG;PLA2G5;ECSIT;RASGRP1;EGFR;PPP3R1;FGF7;EEF2K;CASP6;RPS6KA2;EIF4EBP1;CHP1;CASP2;MBP;RAC1;MEF2D;MAP3K4;MAP2K5;HMGN1;MAP4K1;PDGFRB;MAP2K4;PDGFRA;MEF2C;PLA2G4B;CACNA2D3;PRKCA;TRAF2;CACNA2D4;PPM1B;JMJD7-PLA2G4B;RASA1;TAB1;LAMTOR3
Inhibition of insulin secretion by adrenaline/noradrenaline	1/29	0.995141	0.999995	0.177006	0.000862157	GNAI2
Phase II of biological oxidations: conjugation	5/71	0.995272	0.999995	0.375055	0.00177752	GSTA4;GSTP1;MAT1A;MAT2B;PAPSS1
RIG-I-like receptor signaling pathway	5/71	0.995272	0.999995	0.375055	0.00177752	DHX58;PIN1;TRAF2;ATG12;ATG5
Autoimmune thyroid disease	3/52	0.995363	0.999995	0.303236	0.00140952	HLA-DMA;HLA-DMB;FASLG
Taste transduction	3/52	0.995363	0.999995	0.303236	0.00140952	TAS2R20;TAS2R10;PDE1A
Activation of kainate receptors upon glutamate binding	1/30	0.995957	0.999995	0.170892	0.000692374	NCALD
Signaling by FGFR1 mutants	1/30	0.995957	0.999995	0.170892	0.000692374	PIK3R1
GABA A and B receptor activation	3/53	0.996005	0.999995	0.297153	0.00118958	ARHGEF9;ADCY3;GNAI2
Thrombin signaling through protease-activated receptors	3/53	0.996005	0.999995	0.297153	0.00118958	ARRB1;PRKCA;PIK3R1
O-linked glycosylation of mucins	4/63	0.996069	0.999995	0.335684	0.00132204	GALNT12;GALNT11;GALNT6;GALNT16
RNA polymerase I promoter opening	1/31	0.996635	0.999995	0.165185	0.000556734	UBTF
Signal amplification	1/31	0.996635	0.999995	0.165185	0.000556734	GNAI2
Metapathway biotransformation	17/174	0.996982	0.999995	0.535041	0.00161722	GSTP1;AKR1A1;AKR1B1;FMO1;HNMT;FMO4;CYP4F12;CYP3A5;HS3ST2;CYP27A1;CYP27C1;GSTA4;CHST12;CYP4V2;CYP2R1;CYP2E1;CHST14
Packaging of telomere ends	1/32	0.9972	0.999995	0.159847	0.000448198	ACD
Sphingolipid de novo biosynthesis	1/32	0.9972	0.999995	0.159847	0.000448198	SPHK2
Gastrin-CREB signaling pathway via PKC and MAPK	21/206	0.997322	0.999995	0.56062	0.00150352	PTGFR;CCL23;TRIO;ARHGEF25;LPAR1;PRKCA;PIK3R2;LPAR4;PIK3R1;ADRA1B;DGKZ;RASGRP1;EGFR;HCRTR2;EDNRA;P2RY6;GRK5;RPS6KA2;AGTR1;GNRH1;GHRL
Interleukin-3 signaling pathway	2/45	0.997414	0.999995	0.23038	0.000596576	FYN;PIK3R1
Signaling by FGFR mutants	2/45	0.997414	0.999995	0.23038	0.000596576	FGF7;PIK3R1
NOD signaling pathway	6/85	0.997491	0.999995	0.375822	0.000944062	COPS6;ITCH;TRIP6;CASP2;RAC1;TAB1
Glucagon signaling in metabolic regulation	1/33	0.99767	0.999995	0.154843	0.000361222	ADCY3
Innate immune system	36/319	0.997763	0.999995	0.627339	0.00140463	UBA7;PRKCSH;C1R;UNC93B1;UBE2L6;HMGB1;ECSIT;RNF135;LGALS3;C5;C6;C7;PPP2R1A;RPS6KA2;CTSK;DHX58;PCBP2;CASP2;ATG5;MAP2K4;MEF2C;DEFB119;TICAM2;PPP2R5D;TRAF2;ATG12;DDOST;DNM1;TIRAP;P2RX7;ITCH;PIN1;TLR7;TAB1;TLR5;UBA52
Transport of inorganic cations/anions and amino acids/oligopeptides	7/95	0.997794	0.999995	0.393521	0.000869058	SLC8A3;SLC7A8;SLC9A6;SLC34A1;SLC43A1;SLC17A7;SLC7A10
Inositol phosphate metabolism	3/57	0.997811	0.999995	0.275075	0.000602692	INPP5B;INPPL1;PLCD1
Chagas disease	8/104	0.99785	0.999995	0.412184	0.000887017	MAP2K4;PPP2R1A;PIK3R2;CD3G;FASLG;PIK3R1;CD3D;GNAI2
Transport of glucose and other sugars, bile salts and organic acids, metal ions and amine compounds	7/96	0.998051	0.999995	0.389076	0.000759073	SLC44A1;HEPH;SLC2A10;SLC2A12;SLC40A1;SLC18A2;SLC39A3
Myometrial relaxation and contraction pathways	14/155	0.998085	0.999995	0.490657	0.000940709	IGFBP5;IGFBP4;LPAR1;ADCY3;PRKCA;ARRB1;DGKZ;CNN2;ACTA2;GRK5;SP1;PKIA;CALM3;PLCD1
Antigen-activated B-cell receptor generation of second messengers	21/211	0.998279	0.999995	0.545701	0.000939975	MAP4K1;VAV3;MEF2C;SH3KBP1;PDPK1;TRPC1;NFATC3;PRKCA;PIK3R2;FASLG;PIK3R1;PPP3R1;IBTK;PRDX1;RASA1;CHP1;CALM3;FYN;RAC1;MEF2D;NCK1
Cytokines and inflammatory response	1/35	0.998386	0.999995	0.145717	0.000235356	IL16
Interleukin-1 signaling pathway	10/125	0.998618	0.999995	0.429868	0.000594312	MAP2K4;TICAM2;UBE2I;UBE2E3;UBE2L6;PIK3R2;PIK3R1;TAB1;ECSIT;RBX1
GM-CSF-mediated signaling events	1/36	0.998657	0.999995	0.141545	0.00019025	PIK3R1
G alpha i pathway	8/108	0.998671	0.999995	0.395601	0.000525921	MAP2K4;GRK5;ADCY3;PRKCA;RGS12;MAP3K4;MAP2K5;EGFR
Neurotrophin signaling pathway	10/126	0.998767	0.999995	0.426136	0.000525562	IRS1;KIDINS220;RPS6KA2;PIK3R2;CALM3;FASLG;PIK3R1;RAC1;MAP2K5;SH2B1
Ion channel transport	3/61	0.99881	0.999995	0.256043	0.000304755	ARHGEF9;ATP8B4;ATP8B2
Signaling by interleukins	8/109	0.998824	0.999995	0.39166	0.000461022	MAP2K4;IL2RB;INPPL1;PIK3R2;FYN;PIK3R1;TAB1;RBX1
TNF-alpha effects on cytokine activity, cell motility, and apoptosis	11/135	0.998837	0.999995	0.438427	0.000510396	CXCL12;CRABP2;FNBP1;CD70;DBT;TNFSF10;PDGFB;TNFAIP2;PPARA;ABCG1;CMKLR1
Interferon signaling	15/168	0.99884	0.999995	0.484265	0.000561834	EIF4A2;UBA7;NUP133;UBE2L6;PIAS1;PPM1B;NUP85;NUP62;PIN1;NUP43;KPNA5;IRF6;GBP2;UBA52;NUP37
Interleukin-23-mediated signaling events	1/37	0.998882	0.999995	0.137605	0.000153927	PIK3R1
Leishmaniasis	4/72	0.998908	0.999995	0.291097	0.000318118	HLA-DMA;HLA-DMB;FCGR2A;TAB1
Interleukin-1 regulation of extracellular matrix	9/120	0.999096	0.999995	0.4008	0.000362623	MMP11;COL1A2;C1R;ID1;TNFAIP2;AKR1B1;NR2F2;DCN;PTGES
Gastric acid secretion	4/74	0.999183	0.999995	0.282746	0.000231176	ADCY3;PRKCA;CALM3;GNAI2
Non-class A, B, C GPCRs	5/86	0.999381	0.999995	0.305324	0.000189027	PTGFR;EDNRA;SMO;ADORA3;DRD4
Complement cascade	4/77	0.999473	0.999995	0.271077	0.000143026	C5;C6;C7;C1R
Interferon-gamma signaling pathway	6/97	0.999481	0.999995	0.326027	0.000169396	PIAS4;CALM3;PIK3R1;IRF6;GBP2;PIAS1
G alpha (s) signaling events	9/125	0.999504	0.999995	0.383408	0.000190228	MC1R;PDE1B;PDE1A;ADCY3;PTH2R;PDE7B;PDE7A;PTGDR;GNAI2
Cytokine-cytokine receptor interaction	26/265	0.999569	0.999995	0.536317	0.000230942	CX3CR1;EDA;AMHR2;PDGFB;FASLG;CXCR6;EGFR;TNFSF10;TNFRSF8;TNFRSF14;IL13RA1;ACVR1;PDGFRB;PDGFRA;CCL23;CD70;IL11RA;TNFSF12;IL10RA;TNFSF13;FLT3LG;BMP7;ACVR2A;CXCL12;TNFSF4;IL2RB
SLC-mediated transmembrane transport	24/251	0.999624	0.999995	0.5213	0.000196154	SLC35B2;SLC27A1;SLC44A1;NUP133;SLC2A10;SLC34A1;SLC35D2;SLC2A12;SLC43A1;SLC40A1;SLC7A10;SLC8A3;SLC7A8;SLC9A6;HEPH;NUP85;NUP62;SLC27A6;SLC17A7;NUP43;SLC37A4;SLC18A2;SLC39A3;NUP37
Voltage-gated potassium channels	1/43	0.999627	0.999995	0.117904	4.39453e-05	KCNF1
Transmission across chemical synapses	16/190	0.999722	0.999995	0.453765	0.000126305	CHRNA1;SNAP25;PDPK1;CACNA2D3;ADCY3;PRKCA;AP2B1;NCALD;GNAI2;GRIN1;ARHGEF9;RPS6KA2;AP2S1;SLC17A7;SLC18A2;VAMP2
Defensins	1/45	0.999741	0.999995	0.112532	2.91291e-05	DEFB119
Oncostatin M	31/311	0.999778	0.999995	0.545275	0.000120947	ECM1;CDKN1B;CRABP2;MCM7;IRS1;C1R;TULP3;EGFR;CKS1B;HSD11B2;HOXA9;EXOSC10;TCEAL3;CBS;TIMP2;CTSH;IL13RA1;MMP2;TPM1;RNASE4;ESR1;COL1A1;P2RX7;COL1A2;CXCL12;RRAGB;CDH11;BLMH;DNASE1L2;SLC27A2;RECK
Hemostasis pathway	51/468	0.999879	0.999995	0.600921	7.24687e-05	KDM1A;ARRB1;SLC7A10;CLU;SPN;SIN3A;PPP2R1A;MYB;PRKG2;SIRPA;RAC1;VAV3;PDPK1;FGG;PRKCA;PPP2R5D;DGKZ;SLC7A8;KCNMA1;SERPING1;PDE5A;CD47;GAS6;ZFPM1;DOCK1;CD63;HDAC2;PDE1B;PDE1A;PDGFB;PRCP;PIK3R2;GATA3;PIK3R1;GATA2;RASGRP1;TTN;GNAI2;KCNMB4;FYN;JAM3;SH2B1;F10;CABLES1;IGF1;CABLES2;COL1A1;SLC8A3;CD2;COL1A2;LAT
Neuroactive ligand-receptor interaction	25/272	0.999887	0.999995	0.498594	5.62399e-05	CHRNA1;PTGFR;THRA;LPAR1;LPAR4;NR3C1;ADRA1B;EDNRA;P2RY6;ADORA3;CTSG;GABRE;DRD4;PTGDR;CHRNB1;GZMA;HTR1B;PTH2R;TRPV1;HCRTR2;GRIN1;P2RX7;MC1R;P2RX4;AGTR1
Interferon alpha/beta signaling	2/64	0.999889	0.999995	0.159597	1.77542e-05	IRF6;GBP2
Potassium channels	5/99	0.9999	0.999995	0.262892	2.62186e-05	KCNF1;KCNJ8;KCNMA1;KCNMB4;ABCC9
Systemic lupus erythematosus	9/139	0.999911	0.999995	0.341828	3.05518e-05	C5;HLA-DMA;C6;HLA-DMB;FCGR2A;C7;C1R;CTSG;ELANE
Immune system signaling by interferons, interleukins, prolactin, and growth hormones	25/280	0.999945	0.999995	0.482716	2.63991e-05	EIF4A2;UBA7;IRS1;INPPL1;UBE2L6;PIK3R2;PIK3R1;NUP85;NUP62;FYN;NUP43;KPNA5;GBP2;SH2B1;MAP2K4;NUP133;PIAS1;RBX1;PPM1B;IL2RB;PIN1;TAB1;IRF6;UBA52;NUP37
Jak-STAT signaling pathway	15/199	0.999956	0.999995	0.40192	1.7849e-05	PTPRT;PIAS4;PIAS3;IL11RA;IL10RA;PTPRO;PIK3R2;PIK3R1;PTPN13;PIAS1;PTPRD;PTPRA;IL2RB;IL13RA1;SOCS5
Calcium regulation in the cardiac cell	9/149	0.999973	0.999995	0.31722	8.7216e-06	SLC8A3;GRK5;PKIA;ADCY3;PRKCA;CALM3;ARRB1;ADRA1B;GNAI2
Transmembrane transport of small molecules	42/432	0.999985	0.999995	0.528577	7.73946e-06	SLC35B2;SLC27A1;ABCB1;SLC44A1;ABCB7;SLC35D2;SLC43A1;SLC40A1;ADCY3;SLC7A10;HEPH;NUP85;NUP62;SLC17A7;NUP43;SLC37A4;ATP6V1E1;RAB11FIP2;ABCD1;SLC18A2;ATP6V1C1;SLC39A3;ATP6V0A1;ATP8B4;ATP6V1G1;ATP8B2;NUP133;SLC2A10;SLC34A1;ABCC5;SLC2A12;ABCC9;SLC8A3;ABCA10;ARHGEF9;ABCB10;SLC7A8;SLC9A6;MYO5B;SLC27A6;ABCG1;NUP37
Chemokine signaling pathway	12/189	0.99999	0.999995	0.334094	3.26466e-06	VAV3;CX3CR1;CCL23;CXCL12;GRK5;ADCY3;PIK3R2;ARRB1;PIK3R1;RAC1;CXCR6;GNAI2
Class B GPCRs (secretin family receptors)	3/95	0.999991	0.999995	0.161088	1.43706e-06	FZD2;SMO;PTH2R
Peptide G-protein coupled receptors	12/192	0.999992	0.999995	0.328466	2.68392e-06	CX3CR1;PYY;EDNRA;C5;CCL23;CXCL12;MC1R;AGTR1;ACKR4;GHRL;CXCR6;HCRTR2
Neuronal system	22/283	0.999992	0.999995	0.414499	3.30546e-06	CHRNA1;KCNF1;SNAP25;KCNJ8;PDPK1;CACNA2D3;ADCY3;PRKCA;ABCC9;AP2B1;NCALD;GNAI2;GRIN1;ARHGEF9;RPS6KA2;KCNMA1;AP2S1;KCNMB4;VAMP1;SLC17A7;SLC18A2;VAMP2
Signal transduction	103/1020	0.999993	0.999995	0.543441	4.01407e-06	FAM13B;IRS1;FAM13A;FGF7;EDNRA;ADORA3;ATP6V1E1;MEN1;MEF2C;ATP6V1G1;FRS3;DGKZ;AGTR1;CUL5;ARHGEF25;LPAR1;ARHGAP19;LPAR4;MTMR4;ARHGAP12;APH1A;INPP5B;C5;GRK5;EIF4EBP1;DVL2;ATP6V1C1;DRD4;MAP2K5;ATP6V0A1;KL;FZD2;HTR1B;ARHGAP28;ESR1;ARHGAP24;COL1A1;MOV10;ARHGAP32;COL1A2;CXCL12;MC1R;COL5A1;AGO1;ITGA11;CNTN1;GNRH1;GRAP;DNAL4;CDKN1B;GDI2;ARHGAP1;CLTA;ARRB1;ADRA1B;EEF2K;MLST8;CASP2;NCK1;FGG;ARHGEF18;ARAP1;OR…
Signaling by GPCR	53/977	0.999993	0.999995	0.273191	1.99732e-06	TRIO;ADRA1B;EDNRA;PPP2R1A;ADORA3;RPS6KA2;RAC1;PTGDR;VAV3;PDPK1;ARHGEF18;PTH2R;PRKCA;PPP2R5D;OR10Q1;DGKZ;ARHGEF9;SMO;AGTR1;ARHGEF7;CX3CR1;PTGFR;ARHGEF25;PDE1B;PDE1A;LPAR1;ADCY3;PIK3R2;LPAR4;PIK3R1;CXCR6;RASGRP1;EGFR;FGD1;GNAI2;C5;PPP3R1;P2RY6;GRK5;DRD4;CCL23;FZD2;HTR1B;HCRTR2;PYY;CXCL12;MC1R;ACKR4;GNRH1;GHRL;RGS12;PDE7B;PDE7A
Interleukin-5 regulation of apoptosis	7/144	0.999993	0.999995	0.252024	1.81786e-06	TRAP1;PSMB4;CLEC2B;FUCA1;TAB1;SRI;CD24
G alpha (i) signaling events	12/199	0.999994	0.999995	0.316036	1.94463e-06	PYY;C5;CCL23;CXCL12;ADORA3;LPAR1;ADCY3;HTR1B;RGS12;CXCR6;DRD4;GNAI2
Olfactory transduction	5/432	0.999994	0.999995	0.0567089	3.36668e-07	GUCA1B;ADCY3;PRKG2;CALM3;OR10Q1
GPCR ligand binding	25/410	0.999994	0.999995	0.317185	1.85637e-06	CX3CR1;PTGFR;LPAR1;LPAR4;CXCR6;ADRA1B;C5;P2RY6;EDNRA;ADORA3;DRD4;PTGDR;CCL23;FZD2;HTR1B;PTH2R;HCRTR2;PYY;CXCL12;MC1R;SMO;AGTR1;ACKR4;GNRH1;GHRL
Class A GPCRs (rhodopsin-like)	15/253	0.999995	0.999995	0.309709	1.5958e-06	CX3CR1;PTGFR;HTR1B;LPAR4;ADRA1B;HCRTR2;EDNRA;P2RY6;LPAR5;ADORA3;AGTR1;ACKR4;DRD4;CMKLR1;PTGDR
Immunoregulatory interactions between a lymphoid and a non-lymphoid cell	4/119	0.999995	0.999995	0.171639	8.26148e-07	KLRD1;CD3G;CD3D;CD34
