# Supplementary material for: Transcriptome of Subcutaneous Adipose Tissue reflect Membrane Dysfunction and Impaired Oxidative Processes in T2D across Heterogenous Populations
Source: Research Square preprint supplement (doi:10.21203/rs.3.rs-7053974/v1), 2025-11-14
Supplement: Supplementary file 6 [file 958c39e6826c6d06e7842ef2.xlsx]

## Sheet: Gene symbols and names
copy	PC1	PC2	input	target	description
ACTA1	0.0415641	-0.0123851	ILMN_2125869	ENSG00000143632	actin alpha 1, skeletal muscle
ACVR1B	0.0801628	0.0380571	ILMN_1763916	ENSG00000135503	activin A receptor type 1B
ACVR1B	0.0801628	0.0380571	ILMN_1766723	ENSG00000135503	activin A receptor type 1B
ACVR1B	0.0801628	0.0380571	ILMN_2243308	ENSG00000135503	activin A receptor type 1B
ACVR1B	0.0801628	0.0380571	ILMN_1786544	ENSG00000135503	activin A receptor type 1B
ADAM23	0.0582325	-0.011454	ILMN_2060086	ENSG00000114948	ADAM metallopeptidase domain 23
ADAMTSL2	0.0755992	0.00383462	ILMN_1721495	ENSG00000197859	ADAMTS like 2
ADARB1	0.00711545	-0.0134835	ILMN_1679797	ENSG00000197381	adenosine deaminase RNA specific B1
ADARB1	0.00711545	-0.0134835	ILMN_2319326	ENSG00000197381	adenosine deaminase RNA specific B1
ADARB1	0.00711545	-0.0134835	ILMN_1697628	ENSG00000197381	adenosine deaminase RNA specific B1
ADARB1	0.00711545	-0.0134835	ILMN_1657442	ENSG00000197381	adenosine deaminase RNA specific B1
ANKDD1A	0.0700038	0.0277425	ILMN_1813139	ENSG00000166839	ankyrin repeat and death domain containing 1A
AVIL	0.0561	-0.0187897	ILMN_1674265	ENSG00000135407	advillin
BCL2L12	0.00979962	-0.0772412	ILMN_2396982	ENSG00000126453	BCL2 like 12
BCL2L12	0.00979962	-0.0772412	ILMN_1752953	ENSG00000126453	BCL2 like 12
BCL2L12	0.00979962	-0.0772412	ILMN_1731193	ENSG00000126453	BCL2 like 12
BCOR	0.0696382	0.00904486	ILMN_1712161	ENSG00000183337	BCL6 corepressor
BCOR	0.0696382	0.00904486	ILMN_1676241	ENSG00000183337	BCL6 corepressor
BCOR	0.0696382	0.00904486	ILMN_1773117	ENSG00000183337	BCL6 corepressor
C1QTNF5	0.0520664	-0.0301025	ILMN_1724355	ENSG00000223953	C1q and TNF related 5
C1QTNF5	0.0520664	-0.0301025	ILMN_1744487	ENSG00000223953	C1q and TNF related 5
CARD19	0.0811392	-0.027235	ILMN_1659189	ENSG00000165233	caspase recruitment domain family member 19
CBLN2	0.052214	-0.0182206	ILMN_1796069	ENSG00000141668	cerebellin 2 precursor
CHRNA10	0.0394027	0.00399262	ILMN_1776314	ENSG00000129749	cholinergic receptor nicotinic alpha 10 subunit
EZH2	0.0715632	-0.0381321	ILMN_1708105	ENSG00000106462	enhancer of zeste 2 polycomb repressive complex 2 subunit
EZH2	0.0715632	-0.0381321	ILMN_2364529	ENSG00000106462	enhancer of zeste 2 polycomb repressive complex 2 subunit
EZH2	0.0715632	-0.0381321	ILMN_1652913	ENSG00000106462	enhancer of zeste 2 polycomb repressive complex 2 subunit
FAM124A	0.0130685	0.0380863	ILMN_1674827	ENSG00000150510	family with sequence similarity 124 member A
FGF18	0.0679328	0.0278494	ILMN_1797030	ENSG00000156427	fibroblast growth factor 18
FGF18	0.0679328	0.0278494	ILMN_1693483	ENSG00000156427	fibroblast growth factor 18
FMNL3	0.0276007	-0.0317541	ILMN_1692678	ENSG00000161791	formin like 3
FMNL3	0.0276007	-0.0317541	ILMN_1657955	ENSG00000161791	formin like 3
FMNL3	0.0276007	-0.0317541	ILMN_2395214	ENSG00000161791	formin like 3
FTMT	0.0349773	-0.0133381	ILMN_1702498	ENSG00000181867	ferritin mitochondrial
GYG1	0.0568424	-0.0218814	ILMN_2230862	ENSG00000163754	glycogenin 1
HBD	0.0819141	0.0146941	ILMN_1815527	ENSG00000223609	hemoglobin subunit delta
HEYL	0.0633518	0.0124303	ILMN_1654324	ENSG00000163909	hes related family bHLH transcription factor with YRPW motif like
HSPA5	0.0597332	-0.0533666	ILMN_1773865	ENSG00000044574	heat shock protein family A (Hsp70) member 5
HSPA8	0.0826	0.0164052	ILMN_1686367	ENSG00000109971	heat shock protein family A (Hsp70) member 8
HSPA8	0.0826	0.0164052	ILMN_2413084	ENSG00000109971	heat shock protein family A (Hsp70) member 8
ICAM4	0.0637453	-0.0159761	ILMN_1681296	ENSG00000105371	intercellular adhesion molecule 4 (Landsteiner-Wiener blood group)
ICAM4	0.0637453	-0.0159761	ILMN_2393067	ENSG00000105371	intercellular adhesion molecule 4 (Landsteiner-Wiener blood group)
ICAM4	0.0637453	-0.0159761	ILMN_1734660	ENSG00000105371	intercellular adhesion molecule 4 (Landsteiner-Wiener blood group)
ID3	0.0286537	0.0374842	ILMN_1732296	ENSG00000117318	inhibitor of DNA binding 3
IFIT1B	0.0435603	0.0346062	ILMN_1759155	ENSG00000204010	interferon induced protein with tetratricopeptide repeats 1B
IFRD1	0.0569154	0.0507708	ILMN_1687390	ENSG00000006652	interferon related developmental regulator 1
IFRD1	0.0569154	0.0507708	ILMN_1667561	ENSG00000006652	interferon related developmental regulator 1
IRAK1	0.0604533	-0.0112873	ILMN_2379130	ENSG00000184216	interleukin 1 receptor associated kinase 1
ITGAV	0.0781545	0.000333589	ILMN_2169439	ENSG00000138448	integrin subunit alpha V
ITPR1	0.0493832	0.0329554	ILMN_1789505	ENSG00000150995	inositol 1,4,5-trisphosphate receptor type 1
JPH1	0.0367847	-0.0084631	ILMN_1693985	ENSG00000104369	junctophilin 1
MAGEA6	0.024558	0.0166367	ILMN_2372681	ENSG00000197172	MAGE family member A6
MARS2	0.0767945	0.0181525	ILMN_2136423	ENSG00000247626	methionyl-tRNA synthetase 2, mitochondrial
MEG8	0.051856	-0.00619714	ILMN_1722632	ENSG00000225746	maternally expressed 8, small nucleolar RNA host gene
MFRP	0.0520664	-0.0301025	ILMN_1744487	ENSG00000235718	membrane frizzled-related protein
MFRP	0.0520664	-0.0301025	ILMN_1724355	ENSG00000235718	membrane frizzled-related protein
MSMO1	0.0497412	0.0298142	ILMN_2402499	ENSG00000052802	methylsterol monooxygenase 1
MSMO1	0.0497412	0.0298142	ILMN_1720889	ENSG00000052802	methylsterol monooxygenase 1
MSMO1	0.0497412	0.0298142	ILMN_1689842	ENSG00000052802	methylsterol monooxygenase 1
MUC1	0.08342	7.41226e-05	ILMN_1677314	ENSG00000185499	mucin 1, cell surface associated
MUC1	0.08342	7.41226e-05	ILMN_1756992	ENSG00000185499	mucin 1, cell surface associated
MUC1	0.08342	7.41226e-05	ILMN_2371911	ENSG00000185499	mucin 1, cell surface associated
NAT1	0.0442289	0.0320631	ILMN_1688071	ENSG00000171428	N-acetyltransferase 1
NAT1	0.0442289	0.0320631	ILMN_1743055	ENSG00000171428	N-acetyltransferase 1
NFKB2	0.0807804	-0.010077	ILMN_2390859	ENSG00000077150	nuclear factor kappa B subunit 2
NFKB2	0.0807804	-0.010077	ILMN_1799062	ENSG00000077150	nuclear factor kappa B subunit 2
NFKB2	0.0807804	-0.010077	ILMN_2247868	ENSG00000077150	nuclear factor kappa B subunit 2
NOP56	0.080696	0.00498354	ILMN_2209515	ENSG00000101361	NOP56 ribonucleoprotein
NOP56	0.080696	0.00498354	ILMN_2044832	ENSG00000101361	NOP56 ribonucleoprotein
PDE4D	0.0797698	0.00353216	ILMN_1791483	ENSG00000113448	phosphodiesterase 4D
PLA1A	0.0315663	0.0442919	ILMN_1792506	ENSG00000144837	phospholipase A1 member A
PPIL1	0.0611097	0.0180404	ILMN_2054392	ENSG00000137168	peptidylprolyl isomerase like 1
PTPRB	0.0514033	0.0289929	ILMN_1672102	ENSG00000127329	protein tyrosine phosphatase receptor type B
RBM39	0.0516164	0.0189787	ILMN_1696935	ENSG00000131051	RNA binding motif protein 39
RBM39	0.0516164	0.0189787	ILMN_2411963	ENSG00000131051	RNA binding motif protein 39
RIPK2	0.0756355	-0.0675209	ILMN_1758939	ENSG00000104312	receptor interacting serine/threonine kinase 2
SCO2	0.0963752	0.0142406	ILMN_1701621	ENSG00000284194	synthesis of cytochrome C oxidase 2
SEC23B	0.0679501	-0.02876	ILMN_1657483	ENSG00000101310	SEC23 homolog B, COPII coat complex component
SEC23B	0.0679501	-0.02876	ILMN_2366246	ENSG00000101310	SEC23 homolog B, COPII coat complex component
SLC25A39	0.0352514	0.00301211	ILMN_1743911	ENSG00000013306	solute carrier family 25 member 39
SNCA	0.0762856	-0.053691	ILMN_1701933	ENSG00000145335	synuclein alpha
SNCA	0.0762856	-0.053691	ILMN_1766165	ENSG00000145335	synuclein alpha
SNORD14D	0.0826	0.0164052	ILMN_2413084	ENSG00000207118	small nucleolar RNA, C/D box 14D
SNORD14D	0.0826	0.0164052	ILMN_1686367	ENSG00000207118	small nucleolar RNA, C/D box 14D
SNORD14E	0.0826	0.0164052	ILMN_2413084	ENSG00000200879	small nucleolar RNA, C/D box 14E
SNORD14E	0.0826	0.0164052	ILMN_1686367	ENSG00000200879	small nucleolar RNA, C/D box 14E
SNORD56	0.080696	0.00498354	ILMN_2209515	ENSG00000229686	small nucleolar RNA, C/D box 56
SNORD56	0.080696	0.00498354	ILMN_2044832	ENSG00000229686	small nucleolar RNA, C/D box 56
SNORD86	0.0892728	-0.00891937	ILMN_2209515	ENSG00000212498	small nucleolar RNA, C/D box 86
TBC1D7	0.0261762	0.0399251	ILMN_1661622	ENSG00000145979	TBC1 domain family member 7
TCTN3	0.0259119	0.0562079	ILMN_1795563	ENSG00000119977	tectonic family member 3
TCTN3	0.0259119	0.0562079	ILMN_1768077	ENSG00000119977	tectonic family member 3
TCTN3	0.0259119	0.0562079	ILMN_1678652	ENSG00000119977	tectonic family member 3
TENT5C	0.0623966	-0.0836268	ILMN_1713266	ENSG00000183508	terminal nucleotidyltransferase 5C
TNF	0.0812616	-0.0360276	ILMN_1728106	ENSG00000232810	tumor necrosis factor
TNFAIP2	0.00526596	-0.115052	ILMN_1727689	ENSG00000185215	TNF alpha induced protein 2
TNFRSF18	0.0436297	-0.0438836	ILMN_2349633	ENSG00000186891	TNF receptor superfamily member 18
TNFRSF18	0.0436297	-0.0438836	ILMN_1743100	ENSG00000186891	TNF receptor superfamily member 18
TOMM40L	0.0378405	0.0504905	ILMN_2065606	ENSG00000158882	translocase of outer mitochondrial membrane 40 like
TRAK1	0.0528927	0.0193309	ILMN_2289924	ENSG00000182606	trafficking kinesin protein 1
TRAK1	0.0528927	0.0193309	ILMN_2399174	ENSG00000182606	trafficking kinesin protein 1
TRAK1	0.0528927	0.0193309	ILMN_1782069	ENSG00000182606	trafficking kinesin protein 1
TRIM36	0.0308931	-0.0323115	ILMN_1668453	ENSG00000152503	tripartite motif containing 36
TRIM36	0.0308931	-0.0323115	ILMN_1674580	ENSG00000152503	tripartite motif containing 36
TRIM36	0.0308931	-0.0323115	ILMN_2361737	ENSG00000152503	tripartite motif containing 36
TRIM36	0.0308931	-0.0323115	ILMN_1724350	ENSG00000152503	tripartite motif containing 36
UBE2T	0.019043	0.0380091	ILMN_1711470	ENSG00000077152	ubiquitin conjugating enzyme E2 T
VOPP1	0.0675683	-0.00319266	ILMN_2226955	ENSG00000154978	VOPP1 WW domain binding protein
WDR1	0.060494	-0.0324901	ILMN_1780036	ENSG00000071127	WD repeat domain 1
WDR1	0.060494	-0.0324901	ILMN_1675844	ENSG00000071127	WD repeat domain 1

## Sheet: Unique Genes
ACTA1
ACVR1B
ADAM23
ADAMTSL2
ADARB1
ANKDD1A
AVIL
BCL2L12
BCOR
C1QTNF5
CARD19
CBLN2
CHRNA10
EZH2
FAM124A
FGF18
FMNL3
FTMT
GYG1
HBD
HEYL
HSPA5
HSPA8
ICAM4
ID3
IFIT1B
IFRD1
IRAK1
ITGAV
ITPR1
JPH1
MAGEA6
MARS2
MEG8
MFRP
MSMO1
MUC1
NAT1
NFKB2
NOP56
PDE4D
PLA1A
PPIL1
PTPRB
RBM39
RIPK2
SCO2
SEC23B
SLC25A39
SNCA
SNORD14D
SNORD14E
SNORD56
SNORD86
TBC1D7
TCTN3
TENT5C
TNF
TNFAIP2
TNFRSF18
TOMM40L
TRAK1
TRIM36
UBE2T
VOPP1
WDR1

## Sheet: Reactome
Term	Overlap	P-value	Adjusted P-value	Odds Ratio	Combined Score	Genes
TAK1-dependent IKK and NF-kappa-B Activation	3/45	0.0004411	0.0946534	22.5533	174.252	IRAK1;RIPK2;NFKB2
p75NTR Recruits Signalling Complexes	2/13	0.000817168	0.0946534	56.5994	402.403	IRAK1;RIPK2
Nucleotide-binding Domain, Leucine Rich Repeat Containing Receptor (NLR) Signaling Pathways	3/61	0.00107746	0.0946534	16.3186	111.507	IRAK1;RIPK2;NFKB2
p75NTR Signals via NF-kB	2/16	0.00124918	0.0946534	44.4643	297.256	IRAK1;RIPK2
JNK (c-Jun Kinases) Phosphorylation and Activation Mediated by Activated Human TAK1	2/22	0.00237417	0.0946534	31.1156	188.035	IRAK1;RIPK2
Activated TAK1 Mediates P38 MAPK Activation	2/23	0.00259476	0.0946534	29.6324	176.439	IRAK1;RIPK2
TNFR2 Non-Canonical NF-kB Pathway	3/88	0.00308369	0.0946534	11.1199	64.2911	TNFRSF18;TNF;NFKB2
Signaling by Interleukins	6/452	0.0037301	0.0946534	4.36951	24.4313	HSPA8;MUC1;IRAK1;RIPK2;TNF;NFKB2
Immune System	15/2150	0.00374703	0.0946534	2.45199	13.6988	HSPA8;HSPA5;RIPK2;TNFRSF18;ITPR1;ICAM4;TNF;NFKB2;MUC1;PTPRB;IRAK1;TRIM36;ITGAV;GYG1;SNCA
Cytokine Signaling in Immune System	8/776	0.0038991	0.0946534	3.44217	19.0937	HSPA8;MUC1;IRAK1;RIPK2;TNFRSF18;TNF;SNCA;NFKB2
MyD88 Cascade Initiated on Plasma Membrane	3/98	0.00417521	0.0946534	9.94436	54.4811	IRAK1;RIPK2;NFKB2
Toll Like Receptor 10 (TLR10) Cascade	3/98	0.00417521	0.0946534	9.94436	54.4811	IRAK1;RIPK2;NFKB2
Toll Like Receptor 5 (TLR5) Cascade	3/98	0.00417521	0.0946534	9.94436	54.4811	IRAK1;RIPK2;NFKB2
Interleukin-1 Signaling	3/102	0.00466951	0.0946534	9.54064	51.2018	IRAK1;RIPK2;NFKB2
TRAF6 Mediated Induction of NFkB and MAP Kinases Upon TLR7 8 or 9 Activation	3/102	0.00466951	0.0946534	9.54064	51.2018	IRAK1;RIPK2;NFKB2
Turbulent Flow Shear Stress Activates Signaling by PIEZO1 and Integrins in Endothelial Cells	2/31	0.00468871	0.0946534	21.4494	115.024	PDE4D;ITGAV
MyD88 Dependent Cascade Initiated on Endosome	3/103	0.00479837	0.0946534	9.44476	50.4301	IRAK1;RIPK2;NFKB2
Toll Like Receptor 3 (TLR3) Cascade	3/106	0.0051978	0.0946534	9.16828	48.2208	IRAK1;RIPK2;NFKB2
Toll Like Receptor 7 8 (TLR7 8) Cascade	3/107	0.00533526	0.0946534	9.07967	47.5177	IRAK1;RIPK2;NFKB2
MyD88-independent TLR4 Cascade	3/110	0.00576074	0.0946534	8.82377	45.5014	IRAK1;RIPK2;NFKB2
TRIF (TICAM1)-mediated TLR4 Signaling	3/110	0.00576074	0.0946534	8.82377	45.5014	IRAK1;RIPK2;NFKB2
Toll Like Receptor 9 (TLR9) Cascade	3/110	0.00576074	0.0946534	8.82377	45.5014	IRAK1;RIPK2;NFKB2
Interleukin-4 and Interleukin-13 Signaling	3/112	0.00605538	0.0946534	8.66099	44.23	HSPA8;MUC1;TNF
MyD88 MAL(TIRAP) Cascade Initiated on Plasma Membrane	3/115	0.00651402	0.0946534	8.42772	42.4235	IRAK1;RIPK2;NFKB2
Toll Like Receptor TLR6 TLR2 Cascade	3/115	0.00651402	0.0946534	8.42772	42.4235	IRAK1;RIPK2;NFKB2
NOD1 2 Signaling Pathway	2/37	0.00663056	0.0946534	17.767	89.1203	IRAK1;RIPK2
Toll Like Receptor 2 (TLR2) Cascade	3/118	0.00699286	0.0946534	8.20663	40.7284	IRAK1;RIPK2;NFKB2
Toll Like Receptor TLR1 TLR2 Cascade	3/118	0.00699286	0.0946534	8.20663	40.7284	IRAK1;RIPK2;NFKB2
C-type Lectin Receptors (CLRs)	3/131	0.00930636	0.121624	7.3683	34.462	MUC1;ITPR1;NFKB2
PKMTs Methylate Histone Lysines	2/46	0.0101099	0.127721	14.1264	64.9002	NFKB2;EZH2
Interleukin-1 Family Signaling	3/140	0.0111405	0.136201	6.88113	30.9456	IRAK1;RIPK2;NFKB2
Innate Immune System	9/1149	0.0127981	0.148548	2.60305	11.3453	HSPA8;MUC1;PTPRB;IRAK1;RIPK2;ITPR1;ITGAV;GYG1;NFKB2
Toll Like Receptor 4 (TLR4) Cascade	3/148	0.0129342	0.148548	6.49885	28.2562	IRAK1;RIPK2;NFKB2
Death Receptor Signaling	3/157	0.0151388	0.168754	6.11626	25.6302	IRAK1;RIPK2;TNF
Acetylcholine Inhibits Contraction of Outer Hair Cells	1/5	0.016393	0.172581	76.6538	315.117	CHRNA10
RHOT1 GTPase Cycle	1/5	0.016393	0.172581	76.6538	315.117	TRAK1
MAP Kinase Activation	2/63	0.0184048	0.188525	10.1808	40.6739	IRAK1;RIPK2
TNFR1-mediated Ceramide Production	1/6	0.0196397	0.189727	61.32	241	TNF
Toll-like Receptor Cascades	3/174	0.0198498	0.189727	5.50348	21.5712	IRAK1;RIPK2;NFKB2
Intracellular Signaling by Second Messengers	4/321	0.0215535	0.189727	3.99247	15.32	IRAK1;FGF18;ITPR1;EZH2
Respiratory Syncytial Virus Genome Transcription	1/7	0.0228758	0.189727	51.0974	193.03	HSPA8
FGFR3b Ligand Binding and Activation	1/7	0.0228758	0.189727	51.0974	193.03	FGF18
IkBA Variant Leads to EDA-ID	1/7	0.0228758	0.189727	51.0974	193.03	NFKB2
RHOT2 GTPase Cycle	1/7	0.0228758	0.189727	51.0974	193.03	TRAK1
DEx H-box Helicases Activate Type I IFN and Inflammatory Cytokines Production	1/7	0.0228758	0.189727	51.0974	193.03	NFKB2
Diseases Associated With O-glycosylation of Proteins	2/71	0.0230275	0.189727	8.99683	33.9276	MUC1;ADAMTSL2
Interleukin-17 Signaling	2/72	0.0236357	0.190494	8.86786	33.2101	IRAK1;RIPK2
Cross-presentation of Particulate Exogenous Antigens (Phagosomes)	1/8	0.0261014	0.190494	43.7956	159.668	ITGAV
Miro GTPase Cycle	1/8	0.0261014	0.190494	43.7956	159.668	TRAK1
PKR-mediated Signaling	2/80	0.0287345	0.190494	7.95513	28.238	HSPA8;SNCA
Myoclonic Epilepsy of Lafora	1/9	0.0293166	0.190494	38.3192	135.252	GYG1
CHL1 Interactions	1/9	0.0293166	0.190494	38.3192	135.252	HSPA8
Interleukin-1 Processing	1/9	0.0293166	0.190494	38.3192	135.252	NFKB2
Lipophagy	1/9	0.0293166	0.190494	38.3192	135.252	HSPA8
mRNA Splicing - Major Pathway	3/204	0.0299242	0.190494	4.67496	16.4048	HSPA8;RBM39;PPIL1
Regulation of HSF1-mediated Heat Shock Response	2/83	0.0307502	0.190494	7.65934	26.6687	HSPA8;HSPA5
Integrin Cell Surface Interactions	2/85	0.0321244	0.190494	7.47402	25.6967	ICAM4;ITGAV
mRNA Editing	1/10	0.0325213	0.190494	34.0598	116.684	ADARB1
ATF6 (ATF6-alpha) Activates Chaperone Genes	1/10	0.0325213	0.190494	34.0598	116.684	HSPA5
RUNX1 and FOXP3 Control the Development of Regulatory T Lymphocytes (Tregs)	1/10	0.0325213	0.190494	34.0598	116.684	TNFRSF18
Regulation of CDH11 Gene Transcription	1/10	0.0325213	0.190494	34.0598	116.684	HEYL
CLEC7A (Dectin-1) Signaling	2/87	0.0335225	0.190494	7.29743	24.7787	ITPR1;NFKB2
mRNA Splicing	3/215	0.0341805	0.190494	4.42992	14.9559	HSPA8;RBM39;PPIL1
Opioid Signalling	2/90	0.0356636	0.190494	7.04759	23.494	PDE4D;ITPR1
CLEC7A (Dectin-1) Induces NFAT Activation	1/11	0.0357155	0.190494	30.6523	102.139	ITPR1
Response of Endothelial Cells to Shear Stress	2/93	0.0378564	0.190494	6.81422	22.3094	PDE4D;ITGAV
Cellular Responses to Mechanical Stimuli	2/93	0.0378564	0.190494	6.81422	22.3094	PDE4D;ITGAV
ATF6 (ATF6-alpha) Activates Chaperones	1/12	0.0388994	0.190494	27.8643	90.4693	HSPA5
FGFR3 Mutant Receptor Activation	1/12	0.0388994	0.190494	27.8643	90.4693	FGF18
SUMOylation of Immune Response Proteins	1/12	0.0388994	0.190494	27.8643	90.4693	NFKB2
PECAM1 Interactions	1/12	0.0388994	0.190494	27.8643	90.4693	ITGAV
Signaling by Activated Point Mutants of FGFR3	1/12	0.0388994	0.190494	27.8643	90.4693	FGF18
Regulation of Signaling by NODAL	1/12	0.0388994	0.190494	27.8643	90.4693	ACVR1B
P75 NTR Receptor-Mediated Signalling	2/98	0.0416227	0.190494	6.45768	20.5297	IRAK1;RIPK2
NF-kB Is Activated and Signals Survival	1/13	0.0420729	0.190494	25.541	80.9229	IRAK1
FGFR2c Ligand Binding and Activation	1/13	0.0420729	0.190494	25.541	80.9229	FGF18
FGFR3 Ligand Binding and Activation	1/13	0.0420729	0.190494	25.541	80.9229	FGF18
FGFR3c Ligand Binding and Activation	1/13	0.0420729	0.190494	25.541	80.9229	FGF18
FGFRL1 Modulation of FGFR1 Signaling	1/13	0.0420729	0.190494	25.541	80.9229	FGF18
Phospholipase C-mediated Cascade; FGFR3	1/13	0.0420729	0.190494	25.541	80.9229	FGF18
TRAF6 Mediated IRF7 Activation in TLR7 8 or 9 Signaling	1/13	0.0420729	0.190494	25.541	80.9229	IRAK1
VEGFA-VEGFR2 Pathway	2/99	0.0423924	0.190494	6.39079	20.1999	ITPR1;ITGAV
Cellular Response to Heat Stress	2/101	0.0439476	0.190494	6.26105	19.5642	HSPA8;HSPA5
Disease	12/2131	0.0445204	0.190494	1.86828	5.81373	HSPA8;HEYL;MUC1;IRAK1;RIPK2;ADAMTSL2;FGF18;ITPR1;TRAK1;GYG1;NFKB2;EZH2
FGFR4 Ligand Binding and Activation	1/14	0.0452361	0.190494	23.5751	72.9853	FGF18
Glycogen Breakdown (Glycogenolysis)	1/14	0.0452361	0.190494	23.5751	72.9853	GYG1
Glycogen Synthesis	1/14	0.0452361	0.190494	23.5751	72.9853	GYG1
IRAK1 Recruits IKK Complex	1/14	0.0452361	0.190494	23.5751	72.9853	IRAK1
IRAK1 Recruits IKK Complex Upon TLR7 8 or 9 Stimulation	1/14	0.0452361	0.190494	23.5751	72.9853	IRAK1
LGI-ADAM Interactions	1/14	0.0452361	0.190494	23.5751	72.9853	ADAM23
Phospholipase C-mediated Cascade; FGFR4	1/15	0.0483891	0.201532	21.8901	66.2938	FGF18
Signaling by VEGF	2/108	0.0495549	0.203115	5.84552	17.5639	ITPR1;ITGAV
Elevation of Cytosolic Ca2+ Levels	1/16	0.0515317	0.203115	20.4297	60.5856	ITPR1
cGMP Effects	1/16	0.0515317	0.203115	20.4297	60.5856	ITPR1
Glycogen Storage Diseases	1/16	0.0515317	0.203115	20.4297	60.5856	GYG1
PI5P, PP2A and IER3 Regulate PI3K AKT Signaling	2/111	0.0520335	0.203115	5.68377	16.8005	IRAK1;FGF18
O-linked Glycosylation	2/114	0.0545558	0.203115	5.53069	16.0862	MUC1;ADAMTSL2
Activated Point Mutants of FGFR2	1/17	0.0546642	0.203115	19.1519	55.666	FGF18
Signaling by Activin	1/17	0.0546642	0.203115	19.1519	55.666	ACVR1B
Protein Methylation	1/17	0.0546642	0.203115	19.1519	55.666	HSPA8
RIP-mediated NFkB Activation via ZBP1	1/17	0.0546642	0.203115	19.1519	55.666	NFKB2
The NLRP3 Inflammasome	1/17	0.0546642	0.203115	19.1519	55.666	NFKB2
Platelet Activation, Signaling and Aggregation	3/262	0.0556757	0.203484	3.61739	10.4478	WDR1;HSPA5;ITPR1
Diseases of Metabolism	3/264	0.0567058	0.203484	3.58931	10.3009	MUC1;ADAMTSL2;GYG1
SHC-mediated Cascade FGFR3	1/18	0.0577864	0.203484	18.0244	51.3877	FGF18
PI-3K Cascade FGFR3	1/18	0.0577864	0.203484	18.0244	51.3877	FGF18
Phospholipase C-mediated Cascade; FGFR2	1/18	0.0577864	0.203484	18.0244	51.3877	FGF18
Negative Regulation of the PI3K AKT Network	2/118	0.057985	0.203484	5.3389	15.2029	IRAK1;FGF18
L1CAM Interactions	2/120	0.0597273	0.203834	5.24788	14.7884	HSPA8;ITGAV
GABA Synthesis, Release, Reuptake and Degradation	1/19	0.0608985	0.203834	17.0222	47.6375	HSPA8
Defective GALNT12 Causes CRCS1	1/19	0.0608985	0.203834	17.0222	47.6375	MUC1
Defective GALNT3 Causes HFTC	1/19	0.0608985	0.203834	17.0222	47.6375	MUC1
VEGFR2 Mediated Cell Proliferation	1/19	0.0608985	0.203834	17.0222	47.6375	ITPR1
Adaptive Immune System	6/854	0.0621796	0.203834	2.25071	6.25186	HSPA5;RIPK2;ITPR1;TRIM36;ICAM4;ITGAV
FGFR2 Ligand Binding and Activation	1/20	0.0640005	0.203834	16.1255	44.3268	FGF18
SHC-mediated Cascade FGFR4	1/20	0.0640005	0.203834	16.1255	44.3268	FGF18
FRS-mediated FGFR3 Signaling	1/20	0.0640005	0.203834	16.1255	44.3268	FGF18
PI-3K Cascade FGFR4	1/20	0.0640005	0.203834	16.1255	44.3268	FGF18
Defective C1GALT1C1 Causes TNPS	1/20	0.0640005	0.203834	16.1255	44.3268	MUC1
PIP3 Activates AKT Signaling	3/281	0.0658259	0.205065	3.36691	9.16049	IRAK1;FGF18;EZH2
Platelet Degranulation	2/128	0.0668734	0.205065	4.9127	13.2886	WDR1;HSPA5
ZBP1(DAI) Mediated Induction of Type I IFNs	1/21	0.0670924	0.205065	15.3185	41.3857	NFKB2
Signal Transduction by L1	1/21	0.0670924	0.205065	15.3185	41.3857	ITGAV
Mitochondrial tRNA Aminoacylation	1/21	0.0670924	0.205065	15.3185	41.3857	2002-03-01
Processing of Capped Intron-Containing Pre-mRNA	3/285	0.0680647	0.205631	3.31847	8.91772	HSPA8;RBM39;PPIL1
FRS-mediated FGFR4 Signaling	1/22	0.0701742	0.205631	14.5883	38.7578	FGF18
Acyl Chain Remodelling of PS	1/22	0.0701742	0.205631	14.5883	38.7578	PLA1A
Signaling by FGFR3 in Disease	1/22	0.0701742	0.205631	14.5883	38.7578	FGF18
Chaperone Mediated Autophagy	1/22	0.0701742	0.205631	14.5883	38.7578	HSPA8
Response to Elevated Platelet Cytosolic Ca2+	2/133	0.0714776	0.205631	4.724	12.4637	WDR1;HSPA5
Neutrophil Degranulation	4/478	0.0730737	0.205631	2.6487	6.92976	HSPA8;PTPRB;ITGAV;GYG1
SHC-mediated Cascade FGFR2	1/23	0.073246	0.205631	13.9245	36.3976	FGF18
Nitric Oxide Stimulates Guanylate Cyclase	1/23	0.073246	0.205631	13.9245	36.3976	ITPR1
PI-3K Cascade FGFR2	1/23	0.073246	0.205631	13.9245	36.3976	FGF18
Signaling by NODAL	1/23	0.073246	0.205631	13.9245	36.3976	ACVR1B
SARS-CoV-2 Activates Modulates Innate and Adaptive Immune Responses	2/138	0.0761824	0.208899	4.54917	11.7124	IRAK1;RIPK2
DARPP-32 Events	1/24	0.0763078	0.208899	13.3184	34.268	PDE4D
NOTCH3 Intracellular Domain Regulates Transcription	1/25	0.0793596	0.208899	12.7628	32.338	HEYL
FRS-mediated FGFR2 Signaling	1/25	0.0793596	0.208899	12.7628	32.338	FGF18
Glycogen Metabolism	1/25	0.0793596	0.208899	12.7628	32.338	GYG1
Inflammasomes	1/25	0.0793596	0.208899	12.7628	32.338	NFKB2
TRAF6 Mediated NF-kB Activation	1/25	0.0793596	0.208899	12.7628	32.338	NFKB2
Downstream Signaling of Activated FGFR3	1/25	0.0793596	0.208899	12.7628	32.338	FGF18
TNFR1-induced Proapoptotic Signaling	1/26	0.0824016	0.208899	12.2517	30.5821	TNF
Termination of O-glycan Biosynthesis	1/26	0.0824016	0.208899	12.2517	30.5821	MUC1
Signal Transduction	13/2613	0.0831774	0.208899	1.63528	4.06659	RIPK2;PDE4D;ITPR1;ACVR1B;TRAK1;TNF;FMNL3;HEYL;IRAK1;FGF18;ID3;ITGAV;EZH2
Hemostasis	5/707	0.0837206	0.208899	2.24557	5.56963	WDR1;HSPA5;ITPR1;ITGAV;HBD
Diseases of Glycosylation	2/146	0.0839082	0.208899	4.2947	10.6424	MUC1;ADAMTSL2
Attenuation Phase	1/27	0.0854336	0.208899	11.7799	28.9787	HSPA8
Cell Recruitment (Pro-Inflammatory Response)	1/27	0.0854336	0.208899	11.7799	28.9787	NFKB2
Syndecan Interactions	1/27	0.0854336	0.208899	11.7799	28.9787	ITGAV
Cholesterol Biosynthesis	1/27	0.0854336	0.208899	11.7799	28.9787	MSMO1
Purinergic Signaling in Leishmaniasis Infection	1/27	0.0854336	0.208899	11.7799	28.9787	NFKB2
Downstream Signaling of Activated FGFR4	1/27	0.0854336	0.208899	11.7799	28.9787	FGF18
Effects of PIP2 Hydrolysis	1/27	0.0854336	0.208899	11.7799	28.9787	ITPR1
Platelet Calcium Homeostasis	1/28	0.0884557	0.214902	11.343	27.5097	ITPR1
Negative Regulation of FGFR3 Signaling	1/29	0.091468	0.216996	10.9374	26.1596	FGF18
TNFs Bind Their Physiological Receptors	1/29	0.091468	0.216996	10.9374	26.1596	TNFRSF18
Respiratory Syncytial Virus (RSV) Genome Replication, Transcription and Translation	1/30	0.0944705	0.216996	10.5597	24.9152	HSPA8
Paracetamol ADME	1/30	0.0944705	0.216996	10.5597	24.9152	NAT1
Synthesis of Active Ubiquitin Roles of E1 and E2 Enzymes	1/30	0.0944705	0.216996	10.5597	24.9152	UBE2T
Dectin-2 Family	1/30	0.0944705	0.216996	10.5597	24.9152	MUC1
Laminin Interactions	1/30	0.0944705	0.216996	10.5597	24.9152	ITGAV
Regulation of CDH11 Expression and Function	1/30	0.0944705	0.216996	10.5597	24.9152	HEYL
Downstream Signaling of Activated FGFR2	1/30	0.0944705	0.216996	10.5597	24.9152	FGF18
Antiviral Mechanism by IFN-stimulated Genes	2/158	0.0959206	0.218999	3.96194	9.28772	HSPA8;SNCA
Negative Regulation of FGFR4 Signaling	1/31	0.0974633	0.219872	10.2072	23.7652	FGF18
Antigen Presentation Folding, Assembly and Peptide Loading of Class I MHC	1/31	0.0974633	0.219872	10.2072	23.7652	HSPA5
Signaling by TGFB Family Members	2/161	0.0989975	0.222012	3.8866	8.98838	ITGAV;ACVR1B
Signaling by Receptor Tyrosine Kinases	4/536	0.100769	0.223977	2.3529	5.39972	FGF18;ITPR1;ID3;ITGAV
FGFR2 Mutant Receptor Activation	1/33	0.10342	0.223977	9.56827	21.71	FGF18
PERK Regulates Gene Expression	1/33	0.10342	0.223977	9.56827	21.71	HSPA5
TNFR1-induced NF-kappa-B Signaling Pathway	1/33	0.10342	0.223977	9.56827	21.71	TNF
Regulation of Expression and Function of Type II Classical Cadherins	1/33	0.10342	0.223977	9.56827	21.71	HEYL
Regulation of Homotypic Cell-Cell Adhesion	1/33	0.10342	0.223977	9.56827	21.71	HEYL
Metabolism of RNA	5/761	0.106078	0.223996	2.07932	4.66513	NOP56;HSPA8;RBM39;PPIL1;ADARB1
Negative Regulation of FGFR2 Signaling	1/34	0.106383	0.223996	9.27786	20.789	FGF18
Late Endosomal Microautophagy	1/34	0.106383	0.223996	9.27786	20.789	HSPA8
Transcriptional Regulation by E2F6	1/34	0.106383	0.223996	9.27786	20.789	EZH2
Diseases of Carbohydrate Metabolism	1/34	0.106383	0.223996	9.27786	20.789	GYG1
Lysosome Vesicle Biogenesis	1/35	0.109337	0.226441	9.00452	19.9299	HSPA8
Diseases Associated With the TLR Signaling Cascade	1/35	0.109337	0.226441	9.00452	19.9299	NFKB2
Diseases of Immune System	1/35	0.109337	0.226441	9.00452	19.9299	NFKB2
Striated Muscle Contraction	1/36	0.112281	0.231275	8.74681	19.1271	ACTA1
Molecules Associated With Elastic Fibres	1/37	0.115216	0.234768	8.50342	18.3754	ITGAV
HSF1-dependent Transactivation	1/37	0.115216	0.234768	8.50342	18.3754	HSPA8
Fanconi Anemia Pathway	1/38	0.118141	0.238168	8.27318	17.6705	UBE2T
Defective B3GALTL Causes PpS	1/38	0.118141	0.238168	8.27318	17.6705	ADAMTSL2
NGF-stimulated Transcription	1/39	0.121057	0.238962	8.05506	17.0082	ID3
O-glycosylation of TSR Domain-Containing Proteins	1/39	0.121057	0.238962	8.05506	17.0082	ADAMTSL2
Association of TriC CCT With Target Proteins During Biosynthesis	1/39	0.121057	0.238962	8.05506	17.0082	NOP56
Ovarian Tumor Domain Proteases	1/39	0.121057	0.238962	8.05506	17.0082	RIPK2
Signaling by FGFR3	1/40	0.123963	0.242828	7.84813	16.3851	FGF18
Class I MHC Mediated Antigen Processing & Presentation	3/373	0.125375	0.242828	2.51789	5.22825	HSPA5;TRIM36;ITGAV
Signaling by FGFR4	1/41	0.12686	0.242828	7.65154	15.7979	FGF18
PRC2 Methylates Histones and DNA	1/41	0.12686	0.242828	7.65154	15.7979	EZH2
DAG and IP3 Signaling	1/41	0.12686	0.242828	7.65154	15.7979	ITPR1
Defective Pyroptosis	1/41	0.12686	0.242828	7.65154	15.7979	EZH2
AUF1 (hnRNP D0) Binds and Destabilizes mRNA	1/42	0.129747	0.244648	7.46454	15.2438	HSPA8
tRNA Aminoacylation	1/42	0.129747	0.244648	7.46454	15.2438	2002-03-01
Glucagon-like Peptide-1 (GLP1) Regulates Insulin Secretion	1/42	0.129747	0.244648	7.46454	15.2438	ITPR1
Signaling by FGFR2 in Disease	1/43	0.132625	0.248836	7.28645	14.7203	FGF18
Elastic Fibre Formation	1/44	0.135494	0.251726	7.11664	14.225	ITGAV
PI3K Cascade	1/44	0.135494	0.251726	7.11664	14.225	FGF18
TBC RABGAPs	1/45	0.138353	0.255784	6.95455	13.7557	TBC1D7
NIK-->noncanonical NF-kB Signaling	1/46	0.141203	0.25853	6.79966	13.3107	NFKB2
Interleukin-10 Signaling	1/46	0.141203	0.25853	6.79966	13.3107	TNF
TGF-beta Receptor Signaling Activates SMADs	1/47	0.144043	0.262463	6.65151	12.8882	ITGAV
Muscle Contraction	2/204	0.145771	0.262573	3.0526	5.87845	ACTA1;ITPR1
NOTCH1 Intracellular Domain Regulates Transcription	1/48	0.146874	0.262573	6.50966	12.4867	HEYL
IRS-mediated Signalling	1/48	0.146874	0.262573	6.50966	12.4867	FGF18
Complex IV Assembly	1/48	0.146874	0.262573	6.50966	12.4867	SCO2
PLC Beta Mediated Events	1/49	0.149697	0.263884	6.37372	12.1046	ITPR1
Signaling by NOTCH3	1/49	0.149697	0.263884	6.37372	12.1046	HEYL
Dectin-1 Mediated Noncanonical NF-kB Signaling	1/49	0.149697	0.263884	6.37372	12.1046	NFKB2
Regulation of TNFR1 Signaling	1/50	0.152509	0.267598	6.24333	11.7408	TNF
Neurotransmitter Release Cycle	1/51	0.155313	0.270017	6.11815	11.3939	HSPA8
IRE1alpha Activates Chaperones	1/51	0.155313	0.270017	6.11815	11.3939	HSPA5
Signaling by FGFR1	1/52	0.158108	0.272376	5.99789	11.063	FGF18
IRS-related Events Triggered by IGF1R	1/52	0.158108	0.272376	5.99789	11.063	FGF18
IGF1R Signaling Cascade	1/53	0.160893	0.274472	5.88225	10.747	FGF18
SARS-CoV-2-host Interactions	2/218	0.16186	0.274472	2.85272	5.19486	IRAK1;RIPK2
G-protein Mediated Events	1/54	0.16367	0.274472	5.77097	10.4449	ITPR1
Signaling by Type 1 Insulin-like Growth Factor 1 Receptor (IGF1R)	1/54	0.16367	0.274472	5.77097	10.4449	FGF18
Insulin Receptor Signalling Cascade	1/54	0.16367	0.274472	5.77097	10.4449	FGF18
Ion Homeostasis	1/54	0.16367	0.274472	5.77097	10.4449	ITPR1
Sensory Processing of Sound by Outer Hair Cells of the Cochlea	1/55	0.166437	0.276665	5.66382	10.156	CHRNA10
RHOJ GTPase Cycle	1/55	0.166437	0.276665	5.66382	10.156	FMNL3
Cellular Responses to Stimuli	5/887	0.168277	0.277597	1.77057	3.1554	HSPA8;HSPA5;PDE4D;ITGAV;EZH2
Golgi Associated Vesicle Biogenesis	1/56	0.169195	0.277597	5.56056	9.87946	HSPA8
HSP90 Chaperone Cycle for Steroid Hormone Receptors (SHR) in the Presence of Ligand	1/56	0.169195	0.277597	5.56056	9.87946	HSPA8
Signaling by NOTCH1 HD+PEST Domain Mutants in Cancer	1/58	0.174685	0.28017	5.36491	9.36054	HEYL
Signaling by NOTCH1 PEST Domain Mutants in Cancer	1/58	0.174685	0.28017	5.36491	9.36054	HEYL
Signaling by NOTCH1 in Cancer	1/58	0.174685	0.28017	5.36491	9.36054	HEYL
Constitutive Signaling by NOTCH1 HD+PEST Domain Mutants	1/58	0.174685	0.28017	5.36491	9.36054	HEYL
Constitutive Signaling by NOTCH1 PEST Domain Mutants	1/58	0.174685	0.28017	5.36491	9.36054	HEYL
Adherens Junctions Interactions	1/59	0.177416	0.28017	5.27215	9.11689	HEYL
Non-integrin membrane-ECM Interactions	1/59	0.177416	0.28017	5.27215	9.11689	ITGAV
TNF Signaling	1/59	0.177416	0.28017	5.27215	9.11689	TNF
Iron Uptake and Transport	1/59	0.177416	0.28017	5.27215	9.11689	FTMT
Nuclear Events (Kinase and Transcription Factor Activation)	1/61	0.182853	0.286369	5.0959	8.65831	ID3
Regulation of PTEN Gene Transcription	1/61	0.182853	0.286369	5.0959	8.65831	EZH2
Chromatin Modifying Enzymes	2/238	0.185367	0.286539	2.60832	4.3961	NFKB2;EZH2
Chromatin Organization	2/238	0.185367	0.286539	2.60832	4.3961	NFKB2;EZH2
Diseases of Signal Transduction by Growth Factor Receptors and Second Messengers	3/451	0.186517	0.286539	2.07122	3.47805	HEYL;FGF18;TRAK1
rRNA Modification in the Nucleus and Cytosol	1/63	0.188254	0.286539	4.93102	8.23463	NOP56
Signaling by FGFR in Disease	1/63	0.188254	0.286539	4.93102	8.23463	FGF18
Ca2+ Pathway	1/63	0.188254	0.286539	4.93102	8.23463	ITPR1
Transcriptional Regulation by MECP2	1/63	0.188254	0.286539	4.93102	8.23463	IRAK1
Cytosolic Sensors of Pathogen-Associated DNA	1/64	0.190941	0.289042	4.8525	8.03474	NFKB2
O-linked Glycosylation of Mucins	1/65	0.193619	0.289042	4.77644	7.84226	MUC1
Signaling by BRAF and RAF1 Fusions	1/65	0.193619	0.289042	4.77644	7.84226	TRAK1
Parasitic Infection Pathways	2/245	0.193711	0.289042	2.53228	4.15645	ITPR1;NFKB2
Leishmania Infection	2/245	0.193711	0.289042	2.53228	4.15645	ITPR1;NFKB2
trans-Golgi Network Vesicle Budding	1/72	0.212126	0.315277	4.30401	6.6737	HSPA8
Signaling by NOTCH1	1/74	0.217336	0.320507	4.18567	6.38864	HEYL
RHOC GTPase Cycle	1/74	0.217336	0.320507	4.18567	6.38864	FMNL3
Signaling by FGFR2	1/75	0.219928	0.323073	4.1289	6.25303	FGF18
ECM Proteoglycans	1/76	0.222512	0.324354	4.07364	6.12176	ITGAV
Regulation of mRNA Stability by Proteins That Bind AU-rich Elements	1/76	0.222512	0.324354	4.07364	6.12176	HSPA8
Sensory Processing of Sound	1/77	0.225088	0.325604	4.01984	5.99465	CHRNA10
Protein Ubiquitination	1/77	0.225088	0.325604	4.01984	5.99465	UBE2T
Diseases of Programmed Cell Death	1/78	0.227655	0.326822	3.96743	5.8715	EZH2
Regulation of Insulin Secretion	1/78	0.227655	0.326822	3.96743	5.8715	ITPR1
Amyloid Fiber Formation	1/80	0.232764	0.332896	3.8666	5.63647	SNCA
Interferon Signaling	2/280	0.236051	0.336328	2.20953	3.18992	HSPA8;SNCA
Oncogenic MAPK Signaling	1/82	0.23784	0.336348	3.77075	5.4154	TRAK1
Signaling by Insulin Receptor	1/82	0.23784	0.336348	3.77075	5.4154	FGF18
Metabolism of Proteins	9/2067	0.239132	0.336918	1.37149	1.96225	NOP56;HSPA8;MUC1;RIPK2;MARS2;UBE2T;ADAMTSL2;SNCA;NFKB2
Constitutive Signaling by Aberrant PI3K in Cancer	1/83	0.240365	0.337401	3.72458	5.30975	FGF18
Transcriptional Regulation of White Adipocyte Differentiation	1/84	0.242882	0.339677	3.67952	5.20718	TNF
TP53 Regulates Metabolic Genes	1/86	0.247892	0.344143	3.59258	5.01079	SCO2
DDX58 IFIH1-mediated Induction of Interferon-Alpha Beta	1/86	0.247892	0.344143	3.59258	5.01079	NFKB2
Platelet Homeostasis	1/87	0.250385	0.346335	3.55063	4.91675	ITPR1
Selective Autophagy	1/89	0.255346	0.351365	3.46958	4.73645	HSPA8
Activation of HOX Genes During Differentiation	1/91	0.260274	0.351365	3.39214	4.56588	EZH2
Activation of Anterior HOX Genes in Hindbrain Development During Early Embryogenesis	1/91	0.260274	0.351365	3.39214	4.56588	EZH2
Signaling by FGFR	1/91	0.260274	0.351365	3.39214	4.56588	FGF18
Chaperonin-mediated Protein Folding	1/91	0.260274	0.351365	3.39214	4.56588	NOP56
Downstream TCR Signaling	1/91	0.260274	0.351365	3.39214	4.56588	RIPK2
Extracellular Matrix Organization	2/300	0.260511	0.351365	2.05914	2.76978	ICAM4;ITGAV
Cell-cell Junction Organization	1/92	0.262727	0.352966	3.35469	4.48402	HEYL
Infectious Disease	6/1311	0.26356	0.352966	1.42751	1.90355	HSPA8;IRAK1;RIPK2;ITPR1;NFKB2;EZH2
Oxidative Stress Induced Senescence	1/94	0.267607	0.35587	3.28222	4.32673	EZH2
Signaling by TGF-beta Receptor Complex	1/94	0.267607	0.35587	3.28222	4.32673	ITGAV
Antigen Activates B Cell Receptor (BCR) Leading to Generation of Second Messengers	1/95	0.270035	0.356597	3.24714	4.25116	ITPR1
Unfolded Protein Response (UPR)	1/95	0.270035	0.356597	3.24714	4.25116	HSPA5
Antigen processing-Cross Presentation	1/96	0.272456	0.358544	3.21279	4.17753	ITGAV
Anchoring of the Basal Body to the Plasma Membrane	1/97	0.274868	0.359224	3.17917	4.10578	TCTN3
Protein Folding	1/97	0.274868	0.359224	3.17917	4.10578	NOP56
SARS-CoV-2 Infection	2/313	0.27644	0.360037	1.97176	2.53522	IRAK1;RIPK2
G Alpha (I) Signalling Events	2/316	0.280116	0.363575	1.95263	2.48482	PDE4D;ITPR1
Role of Phospholipids in Phagocytosis	1/107	0.298564	0.386197	2.87779	3.4786	ITPR1
Integration of Energy Metabolism	1/108	0.300891	0.387883	2.85075	3.42378	ITPR1
Drug ADME	1/109	0.303211	0.388164	2.82422	3.37022	NAT1
FCERI Mediated Ca+2 Mobilization	1/110	0.305523	0.388164	2.79817	3.31787	ITPR1
Adipogenesis	1/110	0.305523	0.388164	2.79817	3.31787	TNF
PI3K AKT Signaling in Cancer	1/110	0.305523	0.388164	2.79817	3.31787	FGF18
Developmental Biology	6/1385	0.30623	0.388164	1.34554	1.59234	HSPA8;ADAM23;ITGAV;ACVR1B;TNF;EZH2
Phase II - Conjugation of Compounds	1/111	0.307827	0.388888	2.77259	3.26671	NAT1
TCR Signaling	1/113	0.312413	0.393371	2.7228	3.16778	RIPK2
Signaling by NTRK1 (TRKA)	1/115	0.31697	0.397787	2.67476	3.07317	ID3
Cell Junction Organization	1/119	0.325993	0.407761	2.58357	2.89587	HEYL
FCGR3A-mediated IL10 Synthesis	1/121	0.330461	0.41199	2.54026	2.81274	ITPR1
Rab Regulation of Trafficking	1/123	0.3349	0.416154	2.49836	2.73302	TBC1D7
Glycerophospholipid Biosynthesis	1/128	0.34587	0.428381	2.39939	2.54742	PLA1A
Post-translational Protein Modification	6/1457	0.348949	0.430787	1.27381	1.34111	HSPA8;MUC1;RIPK2;UBE2T;ADAMTSL2;NFKB2
Cardiac Conduction	1/130	0.350208	0.430938	2.36196	2.47823	ITPR1
Respiratory Syncytial Virus Infection Pathway	1/133	0.356662	0.43725	2.30793	2.3794	HSPA8
Beta-catenin Independent WNT Signaling	1/134	0.358799	0.43725	2.29046	2.3477	ITPR1
Signaling by NTRKs	1/134	0.358799	0.43725	2.29046	2.3477	ID3
RHO GTPases Activate Formins	1/139	0.369381	0.448703	2.20691	2.19792	FMNL3
Macroautophagy	1/143	0.377722	0.457369	2.14431	2.0877	HSPA8
PTEN Regulation	1/145	0.381852	0.459434	2.11432	2.0355	EZH2
Clathrin-mediated Endocytosis	1/145	0.381852	0.459434	2.11432	2.0355	HSPA8
RHOA GTPase Cycle	1/149	0.390031	0.46779	2.05676	1.9365	FMNL3
CDC42 GTPase Cycle	1/155	0.402099	0.47814	1.97602	1.80027	FMNL3
Metabolism of Steroids	1/155	0.402099	0.47814	1.97602	1.80027	MSMO1
Cell-Cell Communication	1/157	0.40607	0.47814	1.95049	1.75784	HEYL
Respiratory Electron Transport	1/158	0.408045	0.47814	1.93797	1.73715	SCO2
Factors Involved in Megakaryocyte Development and Platelet Production	1/158	0.408045	0.47814	1.93797	1.73715	HBD
G Alpha (S) Signalling Events	1/158	0.408045	0.47814	1.93797	1.73715	PDE4D
Autophagy	1/158	0.408045	0.47814	1.93797	1.73715	HSPA8
Anti-inflammatory Response Favouring Leishmania Parasite Infection	1/159	0.410014	0.47814	1.92561	1.7168	ITPR1
Leishmania Parasite Growth and Survival	1/159	0.410014	0.47814	1.92561	1.7168	ITPR1
Signaling by the B Cell Receptor (BCR)	1/162	0.415883	0.483496	1.88944	1.6577	ITPR1
Cellular Senescence	1/167	0.425536	0.493205	1.83207	1.56533	EZH2
Fcgamma Receptor (FCGR) Dependent Phagocytosis	1/168	0.427448	0.493911	1.821	1.54771	ITPR1
SUMO E3 Ligases SUMOylate Target Proteins	1/170	0.431252	0.496792	1.79927	1.5133	NFKB2
SUMOylation	1/176	0.442517	0.507354	1.73705	1.41618	NFKB2
Viral Infection Pathways	4/1029	0.443098	0.507354	1.19018	0.968764	HSPA8;IRAK1;RIPK2;EZH2
Major Pathway of rRNA Processing in the Nucleolus and Cytosol	1/189	0.466176	0.532171	1.61588	1.23322	NOP56
Fc Epsilon Receptor (FCERI) Signaling	1/197	0.480241	0.546581	1.54929	1.13635	ITPR1
rRNA Processing in the Nucleus and Cytosol	1/199	0.4837	0.547544	1.53349	1.11376	NOP56
Cellular Responses to Stress	3/787	0.484087	0.547544	1.16314	0.843851	HSPA8;HSPA5;EZH2
Cilium Assembly	1/200	0.485421	0.547544	1.52571	1.10269	TCTN3
Transcriptional Regulation by RUNX1	1/202	0.488846	0.549771	1.51037	1.08098	TNFRSF18
SARS-CoV Infections	2/498	0.491879	0.551545	1.22467	0.868932	IRAK1;RIPK2
HCMV Early Events	1/205	0.493941	0.552224	1.48793	1.0495	EZH2
Signaling by NOTCH	1/209	0.500657	0.558086	1.45902	1.0094	HEYL
Phospholipid Metabolism	1/211	0.503982	0.560145	1.44498	0.990122	PLA1A
G Alpha (Q) Signalling Events	1/219	0.517066	0.573005	1.39139	0.917741	ITPR1
Biological Oxidations	1/222	0.521884	0.576659	1.37229	0.892417	NAT1
Immunoregulatory Interactions Between a Lymphoid and a non-Lymphoid Cell	1/223	0.523479	0.57674	1.36604	0.884182	ICAM4
Axon Guidance	2/541	0.53638	0.589241	1.12448	0.700451	HSPA8;ITGAV
Cell Surface Interactions at the Vascular Wall	1/233	0.539148	0.59057	1.3065	0.807108	ITGAV
rRNA Processing	1/237	0.545273	0.595558	1.28409	0.778763	NOP56
Nervous System Development	2/567	0.561998	0.612061	1.07129	0.617342	HSPA8;ITGAV
HCMV Infection	1/259	0.577553	0.626937	1.17329	0.644081	EZH2
Aerobic Respiration and Respiratory Electron Transport	1/260	0.578965	0.626937	1.1687	0.638708	SCO2
Generic Transcription Pathway	4/1230	0.584782	0.630903	0.984476	0.528187	IRAK1;SCO2;TNFRSF18;EZH2
RAF MAP Kinase Cascade	1/265	0.585958	0.630903	1.14627	0.612691	FGF18
Deubiquitination	1/268	0.590098	0.633239	1.13322	0.597735	RIPK2
Transmission Across Chemical Synapses	1/269	0.591469	0.633239	1.12893	0.592854	HSPA8
MAPK1 MAPK3 Signaling	1/271	0.594197	0.634369	1.12046	0.583246	FGF18
Signaling by WNT	1/287	0.615389	0.653547	1.05691	0.513131	ITPR1
Metabolism of Carbohydrates	1/290	0.61924	0.653547	1.04578	0.501204	GYG1
Epigenetic Regulation of Gene Expression	1/291	0.620515	0.653547	1.04212	0.497307	EZH2
RHO GTPase Effectors	1/291	0.620515	0.653547	1.04212	0.497307	FMNL3
GPCR Downstream Signalling	2/633	0.622508	0.653547	0.955973	0.45313	PDE4D;ITPR1
Membrane Trafficking	2/633	0.622508	0.653547	0.955973	0.45313	HSPA8;TBC1D7
Antigen Processing Ubiquitination & Proteasome Degradation	1/296	0.626827	0.655761	1.0242	0.478387	TRIM36
Organelle Biogenesis and Maintenance	1/297	0.628077	0.655761	1.02069	0.474714	TCTN3
Translation	1/302	0.634265	0.660402	1.00348	0.456871	2002-03-01
DNA Repair	1/312	0.646339	0.67113	0.970715	0.42365	UBE2T
MAPK Family Signaling Cascades	1/314	0.648706	0.671748	0.964414	0.417375	FGF18
RNA Polymerase II Transcription	4/1360	0.664973	0.686716	0.883909	0.360643	IRAK1;SCO2;TNFRSF18;EZH2
Signaling by Rho GTPases, Miro GTPases and RHOBTB3	2/688	0.667955	0.687921	0.876822	0.353828	FMNL3;TRAK1
Signaling by GPCR	2/706	0.68186	0.700339	0.853604	0.326871	PDE4D;ITPR1
Transcriptional Regulation by TP53	1/362	0.701063	0.718116	0.834136	0.29625	SCO2
Vesicle-mediated Transport	2/752	0.715282	0.730706	0.799333	0.26784	HSPA8;TBC1D7
Metabolism of Lipids	2/758	0.719422	0.732959	0.792741	0.261056	MSMO1;PLA1A
Metabolism	6/2181	0.739491	0.751386	0.816506	0.246416	NAT1;SCO2;ITPR1;MSMO1;GYG1;PLA1A
Neuronal System	1/411	0.746573	0.756554	0.732608	0.214113	HSPA8
RHO GTPase Cycle	1/450	0.777856	0.786153	0.667637	0.16772	FMNL3
Gene Expression (Transcription)	4/1615	0.790586	0.796894	0.733786	0.172425	IRAK1;SCO2;TNFRSF18;EZH2
Sensory Perception	1/640	0.883524	0.888211	0.464548	0.057528	CHRNA10
Signaling by Rho GTPases	1/672	0.895591	0.89796	0.44166	0.0487027	FMNL3
Transport of Small Molecules	1/724	0.912624	0.912624	0.408788	0.0373759	FTMT

## Sheet: WikiPathway
Term	Overlap	P-value	Adjusted P-value	Odds Ratio	Combined Score	Genes
Ebstein Barr Virus LMP1 Signaling WP262	3/23	5.79811e-05	0.0128718	47.4143	462.545	IRAK1;TNF;NFKB2
miRNA Role In Immune Response In Sepsis WP4329	3/37	0.000246125	0.0171133	27.8711	231.6	IRAK1;TNF;NFKB2
ApoE And miR 146 In Inflammation And Atherosclerosis WP3926	2/8	0.000296484	0.0171133	103.792	843.153	IRAK1;NFKB2
Altered Glycosylation Of MUC1 In Tumor Microenvironment WP4480	2/9	0.000380382	0.0171133	88.9598	700.499	MUC1;TNF
Fas Ligand Pathway And Stress Induction Of Heat Shock Proteins WP314	3/43	0.000385434	0.0171133	23.6833	186.178	ACTA1;RIPK2;TNF
Apoptosis Related Network Due To Altered Notch3 Ovarian Cancer WP2864	3/53	0.000714629	0.0264413	18.9371	137.176	HSPA5;RIPK2;TNF
Network Map Of SARS CoV 2 Signaling WP5115	5/254	0.00151047	0.0392663	6.48002	42.0899	HSPA8;IRAK1;HBD;TNF;NFKB2
MFAP5 Effect On Permeability And Motility Of Endothelial Cells WP4560	2/18	0.00158594	0.0392663	38.9023	250.787	ITPR1;ITGAV
Parkin Ubiquitin Proteasomal System Pathway WP2359	3/71	0.00167139	0.0392663	13.9118	88.9532	HSPA8;HSPA5;SNCA
LTF Danger Signal Response Pathway WP4478	2/19	0.00176875	0.0392663	36.6121	232.029	IRAK1;TNF
Hypertrophy Model WP516	2/20	0.0019611	0.0395786	34.5764	215.558	WDR1;IFRD1
Effects Of MFN2 Mutation WP5443	2/24	0.00282464	0.0522559	28.2841	166.01	TRAK1;SNCA
TLR4 Signaling And Tolerance WP3851	2/28	0.00383581	0.0655038	23.9279	133.12	IRAK1;TNF
Toll Like Receptor Signaling Related To MyD88 WP3858	2/31	0.00468871	0.0692302	21.4494	115.024	IRAK1;NFKB2
FBXL10 Enhancement Of MAP ERK Signaling In DLBCL WP4553	2/33	0.00530142	0.0692302	20.0635	105.128	BCOR;EZH2
Resistin As A Regulator Of Inflammation WP4481	2/33	0.00530142	0.0692302	20.0635	105.128	ITPR1;TNF
Signal Transduction Through IL1R WP4496	2/33	0.00530142	0.0692302	20.0635	105.128	IRAK1;TNF
Photodynamic Therapy Induced NF kB Survival Signaling WP3617	2/35	0.00594886	0.0733692	18.8456	96.5756	TNF;NFKB2
TNF Related Weak Inducer Of Apoptosis TWEAK Signaling WP2036	2/38	0.00698412	0.0816039	17.2726	85.7431	TNF;NFKB2
Catabolism Of Skeletal Muscle In Cachexia WP5474	2/40	0.00771634	0.0856514	16.3618	79.5908	TNF;NFKB2
MAPK Signaling WP382	4/246	0.00887135	0.0895731	5.2498	24.8049	HSPA8;FGF18;TNF;NFKB2
Fibrin Complement Receptor 3 Signaling WP4136	2/43	0.00887662	0.0895731	15.1623	71.632	IRAK1;TNF
Measles Virus Infection WP4630	3/136	0.0103015	0.0991248	7.08951	32.4378	HSPA8;IRAK1;NFKB2
Ectoderm Differentiation WP2858	3/138	0.0107162	0.0991248	6.98377	31.6784	PTPRB;BCOR;SNCA
Vitamin B12 Metabolism WP1533	2/54	0.0137438	0.11394	11.9483	51.2244	TNF;NFKB2
Hematopoietic SC Differentiation WP2849	2/55	0.0142324	0.11394	11.7223	49.8459	MUC1;ACVR1B
Breast Cancer Pathway WP4262	3/154	0.0143819	0.11394	6.23873	26.4633	HEYL;FGF18;NFKB2
IL18 Signaling WP4754	2/56	0.0147284	0.11394	11.5046	48.5263	IRAK1;TNF
Myometrial Relaxation And Contraction Pathways WP289	3/156	0.0148841	0.11394	6.15655	25.9035	ACTA1;PDE4D;ITPR1
TGF Beta Receptor Signaling In Skeletal Dysplasias WP4816	2/58	0.0157426	0.116495	11.0926	46.0498	ADAMTSL2;TNF
Folate Metabolism WP176	2/69	0.021831	0.156338	9.26632	35.4383	TNF;NFKB2
Extrafollicular And Follicular B Cell Activation By SARS CoV 2 WP5218	2/74	0.0248719	0.156804	8.62066	31.8449	HSPA8;TNF
Affected Pathways In Duchenne Muscular Dystrophy WP5356	2/74	0.0248719	0.156804	8.62066	31.8449	ITPR1;TNF
Burn Wound Healing WP5055	2/74	0.0248719	0.156804	8.62066	31.8449	ACTA1;TNF
T Cell Receptor Signaling WP69	2/75	0.0254997	0.156804	8.50214	31.1951	RIPK2;ITPR1
ROS In COVID 19 Endothelial Dysfunction WP5258	1/8	0.0261014	0.156804	43.7956	159.668	TNF
Non Genomic Actions Of 1 25 Dihydroxyvitamin D3 WP4341	2/76	0.026134	0.156804	8.38682	30.5659	TNF;NFKB2
Acute Viral Myocarditis WP4298	2/85	0.0321244	0.171879	7.47402	25.6967	TNF;NFKB2
Interleukin 1 Induced Activation Of NF kB WP3656	1/10	0.0325213	0.171879	34.0598	116.684	IRAK1
Selenium Micronutrient Network WP15	2/86	0.0328205	0.171879	7.38467	25.2312	TNF;NFKB2
T Cell Activation SARS CoV 2 WP5098	2/88	0.0342303	0.171879	7.21221	24.3386	ITPR1;TNF
TNF Alpha Signaling WP231	2/89	0.0349441	0.171879	7.12895	23.9106	TNF;NFKB2
Induction Of Autophagy And TLR Signaling By Graphene Oxide WP5336	1/11	0.0357155	0.171879	30.6523	102.139	TNF
Inclusion Body Myositis WP5120	1/11	0.0357155	0.171879	30.6523	102.139	NFKB2
IDO Metabolic Pathway WP5414	1/11	0.0357155	0.171879	30.6523	102.139	TNF
G Protein Signaling WP35	2/91	0.0363888	0.171879	6.96805	23.0886	PDE4D;ITPR1
P53 Transcriptional Gene Network WP4963	2/91	0.0363888	0.171879	6.96805	23.0886	SCO2;TNF
Nanoparticle Triggered Regulated Necrosis WP2513	1/12	0.0388994	0.172985	27.8643	90.4693	TNF
Toll Like Receptor Signaling WP75	2/95	0.0393464	0.172985	6.667	21.5701	IRAK1;TNF
MFAP5 Mediated Ovarian Cancer Cell Motility And Invasiveness WP3301	1/13	0.0420729	0.172985	25.541	80.9229	ITGAV
Osteopontin Signaling WP1434	1/13	0.0420729	0.172985	25.541	80.9229	ITGAV
Cell Type Dependent Selectivity Of CCK2R Signaling WP3679	1/13	0.0420729	0.172985	25.541	80.9229	ITPR1
Disorders Of Galactose Metabolism WP5173	1/13	0.0420729	0.172985	25.541	80.9229	GYG1
1P36 Copy Number Variation Syndrome WP5345	2/102	0.0447332	0.172985	6.19813	19.2578	HSPA8;TNFRSF18
Osteoblast Signaling WP322	1/14	0.0452361	0.172985	23.5751	72.9853	ITGAV
Mammary Gland Development Pathway Embryonic Development Stg 1/4 WP2813	1/15	0.0483891	0.172985	21.8901	66.2938	TNF
Pro Survival Signaling Of Neuroprotectin D1 WP5182	1/15	0.0483891	0.172985	21.8901	66.2938	TNF
COVID 19 Adverse Outcome Pathway WP4891	1/15	0.0483891	0.172985	21.8901	66.2938	TNF
Cholesterol Biosynthesis Pathway WP197	1/15	0.0483891	0.172985	21.8901	66.2938	MSMO1
Interactome Of Polycomb Repressive Complex 2 PRC2 WP2916	1/16	0.0515317	0.172985	20.4297	60.5856	EZH2
ID Signaling WP53	1/16	0.0515317	0.172985	20.4297	60.5856	ID3
8Q11 23 RB1CC1 Copy Number Variation WP5412	1/16	0.0515317	0.172985	20.4297	60.5856	TNF
Cytokine Cytokine Receptor Interaction WP5473	3/255	0.0521427	0.172985	3.7192	10.9857	TNFRSF18;ACVR1B;TNF
HDAC6 Interactions In The Central Nervous System WP5426	2/112	0.0528695	0.172985	5.63182	16.5571	HSPA8;SNCA
VEGFA VEGFR2 Signaling WP3888	4/430	0.0536072	0.172985	2.95441	8.64483	FMNL3;RBM39;ITGAV;HBD
Cells And Molecules Involved In Acute Inflammatory Response WP4493	1/17	0.0546642	0.172985	19.1519	55.666	TNF
Involvement Of Secretase In Neurodegenerative Diseases WP5372	1/17	0.0546642	0.172985	19.1519	55.666	SNCA
Alzheimer 39 S Disease WP5124	3/261	0.0551641	0.172985	3.6316	10.5223	ITPR1;TNF;SNCA
Alzheimer 39 S Disease And miRNA Effects WP2059	3/261	0.0551641	0.172985	3.6316	10.5223	ITPR1;TNF;SNCA
Pleural Mesothelioma WP5087	4/437	0.0562443	0.172985	2.90561	8.36249	ACTA1;FGF18;ITGAV;EZH2
Ulcerative Colitis Signaling WP5174	1/18	0.0577864	0.172985	18.0244	51.3877	TNF
Genes Associated With The Development Of Rheumatoid Arthritis WP5033	1/18	0.0577864	0.172985	18.0244	51.3877	ITGAV
MYD88 Distinct Input Output Pathway WP3877	1/18	0.0577864	0.172985	18.0244	51.3877	IRAK1
Cholesterol Synthesis Disorders WP5193	1/18	0.0577864	0.172985	18.0244	51.3877	MSMO1
KCNQ2 Related Epilepsies WP5360	1/19	0.0608985	0.172985	17.0222	47.6375	ITPR1
Overview Of Nanoparticle Effects WP3287	1/19	0.0608985	0.172985	17.0222	47.6375	TNF
Fragile X Syndrome WP4549	2/122	0.0614876	0.172985	5.1599	14.3905	TBC1D7;ITPR1
Lung Pathology Of COVID 19 WP5146	1/20	0.0640005	0.172985	16.1255	44.3268	TNF
Serotonin Receptor 2 And ELK SRF GATA4 Signaling WP732	1/20	0.0640005	0.172985	16.1255	44.3268	ITPR1
Cell Differentiation Expanded Index WP2023	1/20	0.0640005	0.172985	16.1255	44.3268	EZH2
Type II Diabetes Mellitus WP1584	1/21	0.0670924	0.172985	15.3185	41.3857	TNF
STING Pathway In Kawasaki Like Disease And COVID 19 WP4961	1/21	0.0670924	0.172985	15.3185	41.3857	ITPR1
Host Pathogen Interaction Of Human CoVs Apoptosis WP4864	1/21	0.0670924	0.172985	15.3185	41.3857	TNF
Ebola Virus Infection In Host WP4217	2/129	0.067786	0.172985	4.87377	13.1173	ITGAV;NFKB2
Adipogenesis WP236	2/131	0.0696236	0.172985	4.79772	12.7843	ID3;TNF
Sildenafil Treatment WP5294	1/22	0.0701742	0.172985	14.5883	38.7578	PDE4D
Transcription Factor Regulation In Adipogenesis WP3599	1/22	0.0701742	0.172985	14.5883	38.7578	TNF
PKC Gamma Calcium Signaling In Ataxia WP4760	1/22	0.0701742	0.172985	14.5883	38.7578	ITPR1
Vitamin D In Inflammatory Diseases WP4482	1/22	0.0701742	0.172985	14.5883	38.7578	TNF
Post COVID Neuroinflammation WP5485	1/23	0.073246	0.172985	13.9245	36.3976	TNF
FGF23 Signaling In Hypophosphatemic Rickets Related Disorders WP4790	1/23	0.073246	0.172985	13.9245	36.3976	NFKB2
Unfolded Protein Response WP4925	1/23	0.073246	0.172985	13.9245	36.3976	HSPA5
Roles Of Ceramides In Development Of Insulin Resistance WP5181	1/23	0.073246	0.172985	13.9245	36.3976	TNF
LDL Influence On CD14 And TLR4 WP5272	1/23	0.073246	0.172985	13.9245	36.3976	NFKB2
Regulation Of Apoptosis By Parathyroid Hormone Related Protein WP3872	1/24	0.0763078	0.174643	13.3184	34.268	BCL2L12
Kynurenine Pathway And Links To Cell Senescence WP5044	1/24	0.0763078	0.174643	13.3184	34.268	TNF
IL1 And Megakaryocytes In Obesity WP2865	1/24	0.0763078	0.174643	13.3184	34.268	IRAK1
Neuroinflammation And Glutamatergic Signaling WP5083	2/140	0.0780915	0.176901	4.48279	11.4306	TNF;NFKB2
Relationship Between Inflammation COX 2 And EGFR WP4483	1/25	0.0793596	0.177958	12.7628	32.338	PLA1A
SARS CoV 2 Mt Chronic Ox Stress And Endothelial Dysfunction WP5183	1/26	0.0824016	0.18112	12.2517	30.5821	TNF
Cytokines And Inflammatory Response WP530	1/26	0.0824016	0.18112	12.2517	30.5821	TNF
FGFR3 Signal Chondrocyte Proliferation Terminal Differentiation WP4767	1/27	0.0854336	0.182645	11.7799	28.9787	FGF18
Photodynamic Therapy Induced Unfolded Protein Response WP3613	1/27	0.0854336	0.182645	11.7799	28.9787	HSPA5
Interactions Immune Cells And miRNAs In Tumor Microenvironment WP4559	1/28	0.0884557	0.182645	11.343	27.5097	NFKB2
Interactions Of Natural Killer Cells In Pancreatic Cancer WP5092	1/28	0.0884557	0.182645	11.343	27.5097	TNF
Dravet Syndrome WP5200	1/28	0.0884557	0.182645	11.343	27.5097	TNF
IL19 Signaling WP5422	1/28	0.0884557	0.182645	11.343	27.5097	TNF
Hepatitis B Infection WP4666	2/151	0.0888541	0.182645	4.14954	10.045	IRAK1;TNF
RAS And Bradykinin Pathways In COVID 19 WP4969	1/29	0.091468	0.186293	10.9374	26.1596	TNF
GPR143 In Melanocytes And Retinal Pigment Epithelium Cells WP4941	1/30	0.0944705	0.186443	10.5597	24.9152	ITPR1
Matrix Metalloproteinases WP129	1/30	0.0944705	0.186443	10.5597	24.9152	TNF
Oligodendrocyte Differentiation Leading To Myelin For CNS WP4304	1/30	0.0944705	0.186443	10.5597	24.9152	TNF
Sudden Infant Death Syndrome SIDS Susceptibility Pathways WP706	2/157	0.0949013	0.186443	3.9877	9.39071	TNF;NFKB2
Antiviral And Anti-Inflam Effects Of Nrf2 On SARS CoV 2 Pathway WP5113	1/31	0.0974633	0.186524	10.2072	23.7652	TNF
Gastric Cancer Network 2 WP2363	1/31	0.0974633	0.186524	10.2072	23.7652	UBE2T
Tumor Suppressor Activity Of SMARCB1 WP4204	1/31	0.0974633	0.186524	10.2072	23.7652	EZH2
Prion Disease Pathway WP3995	1/32	0.100446	0.187387	9.87742	22.6996	HSPA5
Development And Heterogeneity Of The ILC Family WP3893	1/32	0.100446	0.187387	9.87742	22.6996	TNF
Monoamine Transport WP727	1/32	0.100446	0.187387	9.87742	22.6996	TNF
Prostaglandin Signaling WP5088	1/33	0.10342	0.18819	9.56827	21.71	TNF
Type I Collagen Synthesis Osteogenesis Imperfecta WP4786	1/33	0.10342	0.18819	9.56827	21.71	ITPR1
Mitochondrial Immune Response To SARS CoV 2 WP5038	1/33	0.10342	0.18819	9.56827	21.71	NFKB2
Vitamin D Sensitive Calcium Signaling In Depression WP4698	1/36	0.112281	0.199828	8.74681	19.1271	ITPR1
Enterocyte Cholesterol Metabolism WP5333	1/36	0.112281	0.199828	8.74681	19.1271	MSMO1
Neovascularization Processes WP4331	1/37	0.115216	0.199828	8.50342	18.3754	NFKB2
Thymic Stromal Lymphopoietin TSLP Signaling WP2203	1/37	0.115216	0.199828	8.50342	18.3754	NFKB2
Serotonin HTR1 Group And FOS Pathway WP722	1/37	0.115216	0.199828	8.50342	18.3754	ITPR1
Melatonin Metabolism And Effects WP3298	1/37	0.115216	0.199828	8.50342	18.3754	IRAK1
Striated Muscle Contraction Pathway WP383	1/38	0.118141	0.200209	8.27318	17.6705	ACTA1
Amyotrophic Lateral Sclerosis ALS WP2447	1/38	0.118141	0.200209	8.27318	17.6705	TNF
Parkinson 39 S Disease Pathway WP2371	1/38	0.118141	0.200209	8.27318	17.6705	SNCA
Immune Infiltration In Pancreatic Cancer WP5285	1/39	0.121057	0.203596	8.05506	17.0082	TNF
Oxidative Damage Response WP3941	1/40	0.123963	0.205372	7.84813	16.3851	TNF
Glycogen Synthesis And Degradation WP500	1/40	0.123963	0.205372	7.84813	16.3851	GYG1
Nucleotide Binding Oligomerization Domain NOD Pathway WP1433	1/41	0.12686	0.208614	7.65154	15.7979	RIPK2
Cholesterol Biosynthesis Pathway In Hepatocytes WP5329	1/43	0.132625	0.214911	7.28645	14.7203	MSMO1
Inflammatory Bowel Disease Signaling WP5198	1/43	0.132625	0.214911	7.28645	14.7203	TNF
Renin Angiotensin Aldosterone System RAAS WP4756	1/44	0.135494	0.217968	7.11664	14.225	ITPR1
15Q25 Copy Number Variation WP5408	1/45	0.138353	0.219024	6.95455	13.7557	ITPR1
Aryl Hydrocarbon Receptor Pathway WP2873	1/45	0.138353	0.219024	6.95455	13.7557	TNF
Endoplasmic Reticulum Stress Response In Coronavirus Infection WP4861	1/46	0.141203	0.219024	6.79966	13.3107	HSPA5
NO cGMP PKG Mediated Neuroprotection WP4008	1/46	0.141203	0.219024	6.79966	13.3107	TNF
Aryl Hydrocarbon Receptor Pathway WP2586	1/46	0.141203	0.219024	6.79966	13.3107	TNF
Circadian Rhythm Genes WP3594	2/201	0.142369	0.219024	3.09909	6.04115	ID3;EZH2
Mechanoreg And Pathology Of YAP TAZ Hippo And Non Hippo Mechs WP4534	1/47	0.144043	0.219024	6.65151	12.8882	ACTA1
Cholesterol Metab With Bloch And Kandutsch Russell Pathways WP4718	1/47	0.144043	0.219024	6.65151	12.8882	MSMO1
IL26 Signaling WP5347	1/48	0.146874	0.220312	6.50966	12.4867	TNF
Exercise Induced Circadian Regulation WP410	1/48	0.146874	0.220312	6.50966	12.4867	HSPA8
Interleukin 1 IL 1 Structural Pathway WP2637	1/49	0.149697	0.223038	6.37372	12.1046	IRAK1
Photodynamic Therapy Induced AP 1 Survival Signaling WP3611	1/50	0.152509	0.224219	6.24333	11.7408	TNF
RANKL RANK Signaling WP2018	1/50	0.152509	0.224219	6.24333	11.7408	NFKB2
Netrin UNC5B Signaling WP4747	1/52	0.158108	0.23092	5.99789	11.063	TNF
NRP1 Triggered Signaling In Pancreatic Cancer WP5144	1/53	0.160893	0.232914	5.88225	10.747	NFKB2
TGF Beta Receptor Signaling WP560	1/54	0.16367	0.232914	5.77097	10.4449	TNF
IL1 Signaling WP195	1/54	0.16367	0.232914	5.77097	10.4449	IRAK1
Phosphodiesterases In Neuronal Function WP4222	1/54	0.16367	0.232914	5.77097	10.4449	PDE4D
Cardiac Hypertrophic Response WP2795	1/55	0.166437	0.235344	5.66382	10.156	TNF
Thyroid Stimulating Hormone TSH Signaling WP2032	1/58	0.174685	0.245444	5.36491	9.36054	PDE4D
Novel Intracellular Components Of RIG I Like Receptor Pathway WP3865	1/60	0.180139	0.251515	5.18253	8.88299	TNF
T Cell Antigen Receptor TCR Pathway During Staph A. Infection WP3863	1/62	0.185558	0.256394	5.01211	8.44234	TNF
Endochondral Ossification WP474	1/63	0.188254	0.256394	4.93102	8.23463	FGF18
Endochondral Ossification With Skeletal Dysplasias WP4808	1/63	0.188254	0.256394	4.93102	8.23463	FGF18
Lung Fibrosis WP3624	1/63	0.188254	0.256394	4.93102	8.23463	TNF
Pathways Affected In Adenoid Cystic Carcinoma WP3651	1/65	0.193619	0.259382	4.77644	7.84226	BCOR
Ferroptosis WP4313	1/65	0.193619	0.259382	4.77644	7.84226	FTMT
SARS CoV 2 Innate Immunity Evasion And Cell Immune Response WP5039	1/66	0.196289	0.259382	4.70272	7.65682	TNF
Physico Chemical Features And Toxicity Associated Pathways WP3680	1/66	0.196289	0.259382	4.70272	7.65682	ACTA1
Histone Modifications WP2369	1/66	0.196289	0.259382	4.70272	7.65682	EZH2
Sterol Regulatory Element Binding Proteins SREBP Signaling WP1982	1/69	0.204246	0.266721	4.49457	7.13931	SEC23B
Urotensin II Mediated Signaling WP5158	1/69	0.204246	0.266721	4.49457	7.13931	TNF
Glucocorticoid Receptor Pathway WP2880	1/70	0.206881	0.268583	4.42921	6.97871	NFKB2
Cholesterol Metabolism WP5304	1/72	0.212126	0.272207	4.30401	6.6737	MSMO1
Primary Focal Segmental Glomerulosclerosis FSGS WP2572	1/72	0.212126	0.272207	4.30401	6.6737	ITGAV
Head And Neck Squamous Cell Carcinoma WP4674	1/73	0.214735	0.272407	4.24402	6.52879	NFKB2
MECP2 And Associated Rett Syndrome WP3584	1/73	0.214735	0.272407	4.24402	6.52879	EZH2
Arrhythmogenic Right Ventricular Cardiomyopathy WP2118	1/74	0.217336	0.274139	4.18567	6.38864	ITGAV
Joubert Syndrome WP4656	1/76	0.222512	0.279083	4.07364	6.12176	TCTN3
Cancer Pathways WP5434	3/507	0.234411	0.292355	1.83579	2.66314	HEYL;ITGAV;NFKB2
MicroRNAs In Cardiomyocyte Hypertrophy WP1544	1/83	0.240365	0.2979	3.72458	5.30975	TNF
Apoptosis WP254	1/84	0.242882	0.2979	3.67952	5.20718	TNF
Polycystic Kidney Disease Pathway WP2571	1/84	0.242882	0.2979	3.67952	5.20718	TNF
ncRNAs In Wnt Signaling In Hepatocellular Carcinoma WP4336	1/85	0.245391	0.299323	3.63553	5.10756	EZH2
Orexin Receptor Pathway WP5094	1/88	0.252869	0.306759	3.50964	4.82534	TNF
Apoptosis Modulation And Signaling WP1772	1/89	0.255346	0.30808	3.46958	4.73645	IRAK1
Allograft Rejection WP2328	1/90	0.257814	0.309377	3.43042	4.65	TNF
Amino Acid Metabolism WP3925	1/91	0.260274	0.31065	3.39214	4.56588	2002-03-01
Focal Adhesion PI3K Akt mTOR Signaling WP3932	2/303	0.264187	0.311471	2.03831	2.71319	FGF18;ITGAV
Thyroid Hormones And Peripheral Downstream Signaling Effects WP4746	1/93	0.265171	0.311471	3.31806	4.40433	ITGAV
lncRNA In Canonical Wnt Signaling And Colorectal Cancer WP4258	1/93	0.265171	0.311471	3.31806	4.40433	EZH2
Small Cell Lung Cancer WP4658	1/95	0.270035	0.315515	3.24714	4.25116	ITGAV
Nuclear Receptors Meta Pathway WP2882	2/314	0.277665	0.322731	1.96534	2.51827	TNF;NFKB2
Neural Crest Differentiation WP2064	1/101	0.28444	0.327179	3.05138	3.83631	NFKB2
Integrin Mediated Cell Adhesion WP185	1/101	0.28444	0.327179	3.05138	3.83631	ITGAV
Genes Related To Primary Cilium Development Based On CRISPR WP4536	1/104	0.291536	0.333614	2.96206	3.65101	TCTN3
Complement System In Neuronal Development And Plasticity WP5090	1/106	0.296229	0.337245	2.90535	3.53471	ITGAV
Macrophage Stimulating Protein MSP Signaling WP5353	1/108	0.300891	0.339963	2.85075	3.42378	TNF
5Q35 Copy Number Variation WP5380	1/109	0.303211	0.339963	2.82422	3.37022	SNCA
DNA Damage Response Only ATM Dependent WP710	1/109	0.303211	0.339963	2.82422	3.37022	NFKB2
CAMKK2 Pathway WP4874	1/110	0.305523	0.34079	2.79817	3.31787	TNF
PI3K Akt Signaling WP4172	2/338	0.307018	0.34079	1.82273	2.15237	FGF18;ITGAV
Embryonic Stem Cell Pluripotency Pathways WP3931	1/117	0.321496	0.355086	2.62838	2.98261	FGF18
Osteoblast Differentiation And Related Diseases WP4787	1/118	0.323749	0.35545	2.60579	2.93877	FGF18
Spinal Cord Injury WP2431	1/119	0.325993	0.35545	2.58357	2.89587	TNF
Effect Of Omega 3 PUFA On Huntington 39 S Disease Pathways WP5470	1/120	0.328231	0.35545	2.56173	2.85387	ITPR1
Hippo Merlin Signaling Dysregulation WP4541	1/120	0.328231	0.35545	2.56173	2.85387	ITGAV
mRNA Processing WP411	1/125	0.339309	0.365664	2.45782	2.65651	RBM39
ADHD And Autism ASD Pathways WP5420	2/370	0.345808	0.370866	1.66151	1.76432	SLC25A39;TNF
Overview Of Proinflammatory And Profibrotic Mediators WP5095	1/129	0.348042	0.371468	2.38053	2.51248	TNF
2Q37 Copy Number Variation Syndrome WP5224	1/136	0.363052	0.385635	2.2563	2.2861	TNF
Endoderm Differentiation WP2853	1/140	0.371476	0.392703	2.19092	2.16961	EZH2
Male Infertility WP4673	1/145	0.381852	0.401759	2.11432	2.0355	TNF
Regulation Of Actin Cytoskeleton WP51	1/150	0.392059	0.410552	2.04285	1.91281	FGF18
Calcium Regulation In Cardiac Cells WP536	1/151	0.39408	0.410731	2.02913	1.88953	ITPR1
Nonalcoholic Fatty Liver Disease WP4396	1/154	0.400104	0.415062	1.98904	1.82202	TNF
Smith Magenis And Potocki Lupski Syndrome Copy Number Variation WP5381	1/156	0.404088	0.417244	1.96318	1.77888	TNF
Epithelial To Mesenchymal Transition In Colorectal Cancer WP4239	1/160	0.411977	0.421469	1.9134	1.69678	EZH2
Insulin Signaling WP481	1/160	0.411977	0.421469	1.9134	1.69678	GYG1
Primary Ovarian Insufficiency WP5316	1/170	0.431252	0.439165	1.79927	1.5133	TNF
Ras Signaling WP4223	1/184	0.457196	0.461352	1.66045	1.29954	PLA1A
Ciliopathies WP4803	1/184	0.457196	0.461352	1.66045	1.29954	TCTN3
Vitamin D Receptor Pathway WP2877	1/186	0.460806	0.462891	1.64233	1.27244	TRAK1
Focal Adhesion WP306	1/199	0.4837	0.4837	1.53349	1.11376	ITGAV

## Sheet: BioPlanet
Term	Overlap	P-value	Adjusted P-value	Odds Ratio	Combined Score	Genes
Epstein-Barr virus LMP1 signaling	3/22	5.05374e-05	0.00930204	49.9123	493.772	IRAK1;TNF;NFKB2
TAK1 activates NF-kappaB by phosphorylation and activation of IKK complex	3/24	6.6108e-05	0.00930204	45.1542	434.574	IRAK1;RIPK2;NFKB2
TNF-alpha effects on cytokine activity, cell motility, and apoptosis	5/135	8.35513e-05	0.00930204	12.4868	117.251	RIPK2;TNFAIP2;ITPR1;TNF;NFKB2
MAPK signaling pathway	6/314	0.000588065	0.0491034	6.37208	47.3998	HSPA8;HSPA5;FGF18;ACVR1B;TNF;NFKB2
Stress induction of HSP regulation	2/15	0.00109536	0.0524788	47.887	326.43	ACTA1;TNF
JNK (c-Jun kinases) phosphorylation and activation mediated by activated human TAK1	2/16	0.00124918	0.0524788	44.4643	297.256	IRAK1;RIPK2
p75 neurotrophin receptor signaling via NF-kB	2/16	0.00124918	0.0524788	44.4643	297.256	IRAK1;RIPK2
TAK1-mediated activation of p38 MAPK	2/17	0.00141272	0.0524788	41.4979	272.319	IRAK1;RIPK2
cAMP cell motility pathway inferred from amoeba model	3/67	0.0014141	0.0524788	14.7842	97.0032	ACTA1;PDE4D;ITPR1
Seven transmembrane receptor signaling through beta-arrestin	3/74	0.00188236	0.0545841	13.3219	83.5982	ACTA1;PDE4D;NFKB2
Toll receptor cascades	4/159	0.00189021	0.0545841	8.23267	51.6276	IRAK1;RIPK2;UBE2T;NFKB2
Hypertrophy pathway	2/20	0.0019611	0.0545841	34.5764	215.558	WDR1;IFRD1
Antigen processing and presentation	3/81	0.0024372	0.0626174	12.1221	72.9375	HSPA8;HSPA5;TNF
NOD signaling pathway	3/85	0.0027951	0.0628954	11.5285	67.786	IRAK1;RIPK2;TNF
NF-kappaB signaling pathway	2/24	0.00282464	0.0628954	28.2841	166.01	IRAK1;TNF
Tumor necrosis factor (TNF) pathway	2/30	0.00439553	0.0917566	22.2165	120.573	TNF;NFKB2
Signaling by interleukins	3/109	0.00561672	0.110352	8.90746	46.1585	IRAK1;RIPK2;NFKB2
Fas signaling pathway	3/115	0.00651402	0.120871	8.42772	42.4235	ACTA1;RIPK2;NFKB2
Signal transduction through IL-1R	2/38	0.00698412	0.122679	17.2726	85.7431	IRAK1;TNF
FAS pathway and stress induction of heat shock protein regulation	2/39	0.00734606	0.122679	16.8049	82.5724	RIPK2;TNF
Interleukin-1 signaling pathway	3/125	0.00818993	0.130259	7.73302	37.156	IRAK1;RIPK2;UBE2T
Nucleotide-binding domain, leucine rich repeat containing receptor (NLR) signaling pathways	2/47	0.0105369	0.14577	13.8118	62.8834	IRAK1;RIPK2
FSH regulation of apoptosis	4/263	0.0111367	0.14577	4.90098	22.0422	ACTA1;ITPR1;MSMO1;PLA1A
Toll-like receptor signaling pathway regulation	3/142	0.0115744	0.14577	6.78143	30.2381	IRAK1;TNF;NFKB2
Interleukin-4 regulation of apoptosis	4/267	0.0117191	0.14577	4.82546	21.4566	HSPA8;RIPK2;ID3;TNF
Interleukin-5 regulation of apoptosis	3/144	0.012018	0.14577	6.68457	29.5548	IRAK1;ITPR1;NFKB2
Malaria	2/51	0.0123233	0.14577	12.6818	55.7524	HBD;TNF
Vitamin B12 metabolism	2/52	0.0127892	0.14577	12.4275	54.1734	TNF;NFKB2
Amyotrophic lateral sclerosis (ALS)	2/53	0.0132627	0.14577	12.1832	52.6656	TNF;TOMM40L
Phospholipase C-mediated cascade	2/54	0.0137438	0.14577	11.9483	51.2244	FGF18;ITPR1
Myometrial relaxation and contraction pathways	3/155	0.0146317	0.14577	6.19737	26.1812	ACTA1;PDE4D;ITPR1
Adaptive immune system	6/606	0.0147566	0.14577	3.22233	13.5856	HSPA5;RIPK2;ITPR1;TRIM36;ICAM4;ITGAV
Caspase cascade in apoptosis	2/59	0.0162607	0.14577	10.8975	44.8868	ACTA1;TNF
Immune system	8/998	0.0165574	0.14577	2.63936	10.8238	IRAK1;HSPA5;RIPK2;ITPR1;TRIM36;ICAM4;ITGAV;NFKB2
RAGE pathway	2/60	0.016786	0.14577	10.7091	43.7702	ID3;TNF
Selenium pathway	2/60	0.016786	0.14577	10.7091	43.7702	TNF;NFKB2
Protein processing in the endoplasmic reticulum	3/166	0.0175433	0.14577	5.77593	23.3525	HSPA8;HSPA5;SEC23B
Signaling events mediated by focal adhesion kinase	2/62	0.0178581	0.14577	10.351	41.666	ACTA1;ITGAV
Alzheimer's disease	3/169	0.0183895	0.14577	5.67068	22.6599	ITPR1;TNF;SNCA
Folate metabolism	2/63	0.0184048	0.14577	10.1808	40.6739	TNF;NFKB2
Hemostasis pathway	5/468	0.0190916	0.14577	3.44705	13.6452	WDR1;HSPA5;ITPR1;ITGAV;HBD
Interleukin-12-mediated signaling events	2/65	0.0195193	0.14577	9.85665	38.7992	RIPK2;NFKB2
Alternative NF-kappaB pathway	1/6	0.0196397	0.14577	61.32	241	NFKB2
MSP/RON receptor signaling pathway	1/6	0.0196397	0.14577	61.32	241	TNF
NF-kappaB activation	1/6	0.0196397	0.14577	61.32	241	IRAK1
CD8/T cell receptor downstream pathway	2/68	0.0212429	0.146933	9.4072	36.234	TNFRSF18;TNF
NFAT involvement in hypertrophy of the heart	2/69	0.021831	0.146933	9.26632	35.4383	ACTA1;TNF
G alpha q pathway	2/70	0.0224259	0.146933	9.1296	34.67	ITPR1;NFKB2
Arylamine metabolism	1/7	0.0228758	0.146933	51.0974	193.03	NAT1
Interleukin-1 processing	1/7	0.0228758	0.146933	51.0974	193.03	NFKB2
Caffeine metabolism	1/7	0.0228758	0.146933	51.0974	193.03	NAT1
FGFR3b ligand binding and activation	1/7	0.0228758	0.146933	51.0974	193.03	FGF18
Leishmaniasis	2/72	0.0236357	0.14895	8.86786	33.2101	IRAK1;TNF
RANKL regulation of apoptosis and immune response	2/74	0.0248719	0.150308	8.62066	31.8449	TNF;SNCA
Glycogen biosynthesis	1/8	0.0261014	0.150308	43.7956	159.668	GYG1
Support of platelet aggregation by Eph kinases and ephrins	1/8	0.0261014	0.150308	43.7956	159.668	ACTA1
Cross-presentation of particulate exogenous antigens (phagosomes)	1/8	0.0261014	0.150308	43.7956	159.668	ITGAV
Visceral fat deposits and the metabolic syndrome	1/8	0.0261014	0.150308	43.7956	159.668	TNF
Opioid signaling	2/80	0.0287345	0.159737	7.95513	28.238	PDE4D;ITPR1
Elevation of cytosolic calcium levels	1/9	0.0293166	0.159737	38.3192	135.252	ITPR1
Platelet activation, signaling and aggregation	3/205	0.0302988	0.159737	4.65158	16.2649	WDR1;HSPA5;ITPR1
Response to elevated platelet cytosolic calcium	2/83	0.0307502	0.159737	7.65934	26.6687	WDR1;HSPA5
Integrin cell surface interactions	2/85	0.0321244	0.159737	7.47402	25.6967	ICAM4;ITGAV
TGF-beta regulation of skeletal system development	2/85	0.0321244	0.159737	7.47402	25.6967	ID3;TNF
Free radical-induced apoptosis	1/10	0.0325213	0.159737	34.0598	116.684	TNF
IKK complex recruitment by IRAK1	1/10	0.0325213	0.159737	34.0598	116.684	IRAK1
TRAF6-mediated IRF7 activation in TLR7/8 or 9 signaling	1/10	0.0325213	0.159737	34.0598	116.684	IRAK1
NODAL signaling regulation	1/10	0.0325213	0.159737	34.0598	116.684	ACVR1B
Signaling by NGF	3/221	0.036628	0.170671	4.30668	14.242	IRAK1;RIPK2;ITPR1
Parkin role in the ubiquitin-proteasomal pathway	1/12	0.0388994	0.170671	27.8643	90.4693	SNCA
Platelet endothelial cell adhesion molecule 1 (PECAM1) interactions	1/12	0.0388994	0.170671	27.8643	90.4693	ITGAV
Activation of chaperones by ATF6 alpha	1/12	0.0388994	0.170671	27.8643	90.4693	HSPA5
Rab GTPases mark targets in the endocytotic machinery	1/12	0.0388994	0.170671	27.8643	90.4693	ACTA1
SODD/TNFR1 signaling pathway	1/12	0.0388994	0.170671	27.8643	90.4693	TNF
Salmonella infection	1/12	0.0388994	0.170671	27.8643	90.4693	ACTA1
FGFR3 ligand binding and activation	1/12	0.0388994	0.170671	27.8643	90.4693	FGF18
G-protein signaling pathways	2/95	0.0393464	0.170671	6.667	21.5701	PDE4D;ITPR1
Death receptor signaling	1/13	0.0420729	0.177878	25.541	80.9229	TNF
FGFR4 ligand binding and activation	1/13	0.0420729	0.177878	25.541	80.9229	FGF18
Dilated cardiomyopathy	2/100	0.0431674	0.180224	6.32526	19.8782	ITGAV;TNF
TNF-alpha signaling pathway	2/101	0.0439476	0.181216	6.26105	19.5642	TNF;NFKB2
Glycogen breakdown (glycogenolysis)	1/14	0.0452361	0.182035	23.5751	72.9853	GYG1
Osteoblast signaling	1/14	0.0452361	0.182035	23.5751	72.9853	ITGAV
Chagas disease	2/104	0.04632	0.183679	6.07598	18.6665	IRAK1;TNF
Adhesion and diapedesis of granulocytes	1/15	0.0483891	0.183679	21.8901	66.2938	TNF
Mu-calpain pathway	1/15	0.0483891	0.183679	21.8901	66.2938	ACTA1
PRC2 complex long-term gene silencing through modification of histone tails	1/15	0.0483891	0.183679	21.8901	66.2938	EZH2
T cell receptor regulation of apoptosis	5/603	0.0487078	0.183679	2.65036	8.00918	BCL2L12;HSPA8;HSPA5;TNFRSF18;TNF
Leptin influence on immune response	2/110	0.0512024	0.183679	5.73669	17.0493	TNF;SNCA
Acetylation and deacetylation of RelA in the nucleus	1/16	0.0515317	0.183679	20.4297	60.5856	TNF
Inhibitor of DNA binding (ID) signaling pathway	1/16	0.0515317	0.183679	20.4297	60.5856	ID3
Serotonin receptor 2 and ELK-SRF/GATA4 signaling	1/16	0.0515317	0.183679	20.4297	60.5856	ITPR1
Interleukin-10 anti-inflammatory signaling pathway	1/16	0.0515317	0.183679	20.4297	60.5856	TNF
Antigen presentation: folding, assembly, and peptide loading of class I MHC proteins	3/255	0.0521427	0.183679	3.7192	10.9857	HSPA5;TRIM36;ITGAV
Integrin beta-5 pathway	1/17	0.0546642	0.183679	19.1519	55.666	ITGAV
Cadmium-induced DNA biosynthesis and proliferation in macrophages	1/17	0.0546642	0.183679	19.1519	55.666	TNF
Cell to cell adhesion signaling	1/17	0.0546642	0.183679	19.1519	55.666	ACTA1
Cells and molecules involved in local acute inflammatory response	1/17	0.0546642	0.183679	19.1519	55.666	TNF
Synaptic proteins at the synaptic junction	1/17	0.0546642	0.183679	19.1519	55.666	ACTA1
BDNF signaling pathway	3/261	0.0551641	0.183679	3.6316	10.5223	HSPA8;WDR1;HSPA5
Cytokine-cytokine receptor interaction	3/265	0.0572243	0.183679	3.57543	10.2285	TNFRSF18;ACVR1B;TNF
Transcriptional activity regulation by PML	1/18	0.0577864	0.183679	18.0244	51.3877	TNF
Interleukin-1 regulation of extracellular matrix	2/120	0.0597273	0.183679	5.24788	14.7884	TNFAIP2;TNF
Notch signaling pathway	2/121	0.0606052	0.183679	5.20352	14.5874	HEYL;TNF
GABA biosynthesis, release, reuptake and degradation	1/19	0.0608985	0.183679	17.0222	47.6375	HSPA8
Platelet calcium homeostasis	1/19	0.0608985	0.183679	17.0222	47.6375	ITPR1
Signaling by NODAL	1/19	0.0608985	0.183679	17.0222	47.6375	ACVR1B
MAL role in Rho-mediated activation of SRF	1/19	0.0608985	0.183679	17.0222	47.6375	ACTA1
p75 neurotrophin receptor-mediated signaling	2/124	0.0632655	0.183679	5.0748	14.0085	IRAK1;RIPK2
Golgi-associated vesicle biogenesis	1/20	0.0640005	0.183679	16.1255	44.3268	HSPA8
Interleukin-3 regulation of hematopoietic cells	1/20	0.0640005	0.183679	16.1255	44.3268	TNF
Cell differentiation pathway	1/20	0.0640005	0.183679	16.1255	44.3268	EZH2
Sprouty regulation of tyrosine kinase signals	1/20	0.0640005	0.183679	16.1255	44.3268	PTPRB
Neurotrophin signaling pathway	2/126	0.0650609	0.183679	4.99244	13.6415	IRAK1;RIPK2
Immune system signaling by interferons, interleukins, prolactin, and growth hormones	3/280	0.0652716	0.183679	3.37923	9.2226	IRAK1;RIPK2;NFKB2
Spliceosome	2/127	0.0659651	0.183679	4.95225	13.4633	HSPA8;PPIL1
Signaling by FGFR in disease	2/128	0.0668734	0.183679	4.9127	13.2886	FGF18;ITPR1
Prion pathway	1/21	0.0670924	0.183679	15.3185	41.3857	HSPA5
S1P/S1P1 pathway	1/21	0.0670924	0.183679	15.3185	41.3857	ITGAV
Cytosolic sensors of pathogen-associated DNA	1/21	0.0670924	0.183679	15.3185	41.3857	NFKB2
Mitochondrial tRNA aminoacylation	1/21	0.0670924	0.183679	15.3185	41.3857	2002-03-01
Y branching of actin filaments	1/21	0.0670924	0.183679	15.3185	41.3857	ACTA1
T cell receptor downstream signaling	1/22	0.0701742	0.186035	14.5883	38.7578	RIPK2
TRAF6 mediated NF-kB activation	1/22	0.0701742	0.186035	14.5883	38.7578	NFKB2
Fanconi anemia pathway	1/22	0.0701742	0.186035	14.5883	38.7578	UBE2T
Adipogenesis	2/133	0.0714776	0.186035	4.724	12.4637	ID3;TNF
Progesterone-initiated oocyte maturation	1/23	0.073246	0.186035	13.9245	36.3976	ACTA1
Interleukin-11 pathway	1/23	0.073246	0.186035	13.9245	36.3976	MUC1
Modulation of interferon signaling by chaperones	1/23	0.073246	0.186035	13.9245	36.3976	TNF
FGFR ligand binding and activation	1/23	0.073246	0.186035	13.9245	36.3976	FGF18
Adrenergic pathway	2/137	0.0752336	0.186035	4.5831	11.8572	PDE4D;ITPR1
Plexin D1 signaling	1/24	0.0763078	0.186035	13.3184	34.268	ITGAV
Protein export	1/24	0.0763078	0.186035	13.3184	34.268	HSPA5
SREBP signaling	1/24	0.0763078	0.186035	13.3184	34.268	SEC23B
Cholesterol biosynthesis	1/24	0.0763078	0.186035	13.3184	34.268	MSMO1
Lysosome vesicle biogenesis	1/24	0.0763078	0.186035	13.3184	34.268	HSPA8
Endogenous Toll-like receptor signaling	1/24	0.0763078	0.186035	13.3184	34.268	IRAK1
DARPP-32 events	1/25	0.0793596	0.188508	12.7628	32.338	PDE4D
PIP2 hydrolysis	1/25	0.0793596	0.188508	12.7628	32.338	ITPR1
RXR/VDR pathway	1/26	0.0824016	0.188508	12.2517	30.5821	TNF
Selenoamino acid metabolism	1/26	0.0824016	0.188508	12.2517	30.5821	2002-03-01
Integrin family cell surface interactions	1/26	0.0824016	0.188508	12.2517	30.5821	ITGAV
Interleukin-27-mediated signaling events	1/26	0.0824016	0.188508	12.2517	30.5821	TNF
Steroid biosynthesis	1/26	0.0824016	0.188508	12.2517	30.5821	MSMO1
TGF-beta signaling in development	1/26	0.0824016	0.188508	12.2517	30.5821	ACVR1B
Termination of O-glycan biosynthesis	1/26	0.0824016	0.188508	12.2517	30.5821	MUC1
Mammalian calpain regulation of cell motility	1/27	0.0854336	0.191509	11.7799	28.9787	ACTA1
TNF/stress-related signaling	1/27	0.0854336	0.191509	11.7799	28.9787	TNF
TWEAK regulation of gene expression	1/27	0.0854336	0.191509	11.7799	28.9787	TNF
Nitric oxide stimulation of guanylate cyclase	1/28	0.0884557	0.19437	11.343	27.5097	ITPR1
PERK-regulated gene expression	1/28	0.0884557	0.19437	11.343	27.5097	HSPA5
Innate immune system	3/319	0.0884559	0.19437	2.9563	7.16977	IRAK1;RIPK2;NFKB2
EGFR1 pathway	2/152	0.0898537	0.194588	4.12167	9.93146	NOP56;ID3
Association of TriC/CCT with target proteins during biosynthesis	1/29	0.091468	0.194588	10.9374	26.1596	NOP56
S1P/S1P3 pathway	1/29	0.091468	0.194588	10.9374	26.1596	ITGAV
Integrin beta-2 pathway	1/29	0.091468	0.194588	10.9374	26.1596	ICAM4
Matrix metalloproteinases	1/29	0.091468	0.194588	10.9374	26.1596	TNF
Pathways in cancer	3/325	0.0922962	0.194773	2.90033	6.91076	FGF18;ITGAV;NFKB2
Asthma	1/30	0.0944705	0.194773	10.5597	24.9152	TNF
TNFR1 signaling pathway	1/30	0.0944705	0.194773	10.5597	24.9152	TNF
MicroRNAs in muscle cell differentiation	1/30	0.0944705	0.194773	10.5597	24.9152	EZH2
Nectin adhesion pathway	1/30	0.0944705	0.194773	10.5597	24.9152	ITGAV
Alpha-V beta-3 integrin/OPN pathway	1/31	0.0974633	0.197289	10.2072	23.7652	ITGAV
Stathmin and breast cancer resistance to antimicrotubule agents	1/31	0.0974633	0.197289	10.2072	23.7652	HSPA5
NF-kappaB activation by non-typeable Hemophilus influenzae	1/31	0.0974633	0.197289	10.2072	23.7652	TNF
Alpha-synuclein signaling	1/32	0.100446	0.199697	9.87742	22.6996	SNCA
Hypothetical network for drug addiction	1/32	0.100446	0.199697	9.87742	22.6996	ACTA1
Serotonin HTR1 group and FOS pathway	1/32	0.100446	0.199697	9.87742	22.6996	ITPR1
Induction of apoptosis through DR3 and DR4/5 death receptors	1/34	0.106383	0.209012	9.27786	20.789	ACTA1
Monoamine transport	1/34	0.106383	0.209012	9.27786	20.789	TNF
Prion diseases	1/35	0.109337	0.21109	9.00452	19.9299	HSPA5
Signal transduction by L1	1/35	0.109337	0.21109	9.00452	19.9299	ITGAV
Cytokines and inflammatory response	1/35	0.109337	0.21109	9.00452	19.9299	TNF
Phospholipids as signaling intermediaries	1/36	0.112281	0.213079	8.74681	19.1271	ITGAV
Glycogen metabolism	1/36	0.112281	0.213079	8.74681	19.1271	GYG1
Neurotransmitter release cycle	1/36	0.112281	0.213079	8.74681	19.1271	HSPA8
Allograft rejection	1/37	0.115216	0.215624	8.50342	18.3754	TNF
Interleukin-23-mediated signaling events	1/37	0.115216	0.215624	8.50342	18.3754	TNF
TGF-beta regulation of extracellular matrix	4/565	0.116217	0.215624	2.22793	4.79517	ACTA1;HEYL;FGF18;TNFAIP2
Signaling events mediated by HDAC class II	1/38	0.118141	0.215624	8.27318	17.6705	BCOR
Signaling of hepatocyte growth factor receptor	1/38	0.118141	0.215624	8.27318	17.6705	ACTA1
Striated muscle contraction	1/38	0.118141	0.215624	8.27318	17.6705	ACTA1
EGFR interaction with phospholipase C-gamma	1/38	0.118141	0.215624	8.27318	17.6705	ITPR1
Signal transduction	6/1020	0.119468	0.216861	1.86588	3.96444	HEYL;IRAK1;FGF18;ITPR1;ICAM4;ITGAV
FRS2-mediated cascade	1/39	0.121057	0.218557	8.05506	17.0082	FGF18
Negative regulation of FGFR signaling	1/40	0.123963	0.222601	7.84813	16.3851	FGF18
Alpha-M beta-2 integrin signaling	1/41	0.12686	0.225379	7.65154	15.7979	TNF
Graft-versus-host disease	1/41	0.12686	0.225379	7.65154	15.7979	TNF
TWEAK signaling pathway	1/42	0.129747	0.226888	7.46454	15.2438	NFKB2
Urokinase-type plasminogen activator (uPA) and uPAR-mediated signaling	1/42	0.129747	0.226888	7.46454	15.2438	ITGAV
VEGF, hypoxia, and angiogenesis	1/42	0.129747	0.226888	7.46454	15.2438	ACTA1
Porphyrin and chlorophyll metabolism	1/43	0.132625	0.227163	7.28645	14.7203	FTMT
Beta-3 integrin cell surface interactions	1/43	0.132625	0.227163	7.28645	14.7203	ITGAV
Insulin secretion regulation by glucagon-like peptide-1	1/43	0.132625	0.227163	7.28645	14.7203	ITPR1
Type 1 diabetes mellitus	1/43	0.132625	0.227163	7.28645	14.7203	TNF
G-protein-mediated events	1/44	0.135494	0.22972	7.11664	14.225	ITPR1
Gastrin pathway	1/44	0.135494	0.22972	7.11664	14.225	ITGAV
RhoA signaling pathway	1/45	0.138353	0.23221	6.95455	13.7557	ACTA1
Signaling by FGFR mutants	1/45	0.138353	0.23221	6.95455	13.7557	FGF18
Transfer RNA aminoacylation	1/46	0.141203	0.235649	6.79966	13.3107	2002-03-01
Actions of nitric oxide in the heart	1/47	0.144043	0.235649	6.65151	12.8882	ACTA1
Agrin in postsynaptic differentiation	1/47	0.144043	0.235649	6.65151	12.8882	ACTA1
Regulation of NFAT transcription factors	1/47	0.144043	0.235649	6.65151	12.8882	TNF
Regulation of transcription by NOTCH1 intracellular domain	1/47	0.144043	0.235649	6.65151	12.8882	HEYL
Messenger RNA processing	2/203	0.144635	0.235649	3.06794	5.93199	RBM39;ADARB1
Activation of chaperones by IRE1 alpha	1/48	0.146874	0.236986	6.50966	12.4867	HSPA5
Diurnally regulated genes with circadian orthologs	1/48	0.146874	0.236986	6.50966	12.4867	HSPA8
Angiopoietin receptor Tie2-mediated signaling	1/49	0.149697	0.238089	6.37372	12.1046	TNF
Arf6 integrin-mediated signaling pathway	1/49	0.149697	0.238089	6.37372	12.1046	ITGAV
Ceramide signaling pathway	1/49	0.149697	0.238089	6.37372	12.1046	TNF
Type 2 diabetes mellitus	1/50	0.152509	0.241413	6.24333	11.7408	TNF
Antigen-activated B-cell receptor generation of second messengers	2/211	0.153773	0.242265	2.94931	5.52193	ITPR1;NFKB2
Amyloids	1/51	0.155313	0.242405	6.11815	11.3939	SNCA
Type I interferon (interferon-alpha/beta) pathway	1/51	0.155313	0.242405	6.11815	11.3939	PTPRB
Drug metabolism: other enzymes	1/52	0.158108	0.245618	5.99789	11.063	NAT1
Protein folding	1/53	0.160893	0.248253	5.88225	10.747	NOP56
Developmental biology	3/420	0.16129	0.248253	2.22873	4.06644	ITGAV;ACVR1B;TNF
RANKL signaling pathway	1/54	0.16367	0.25076	5.77097	10.4449	NFKB2
Actin cytoskeleton regulation	2/226	0.171197	0.258691	2.74972	4.85309	FGF18;ITGAV
Keratinocyte differentiation	1/57	0.171945	0.258691	5.46099	9.61452	TNF
Mechanism of gene regulation by peroxisome proliferators via PPAR-alpha	1/57	0.171945	0.258691	5.46099	9.61452	TNF
PI3K cascade	1/57	0.171945	0.258691	5.46099	9.61452	FGF18
HIV-1 Nef as negative effector of Fas and TNF	1/58	0.174685	0.261636	5.36491	9.36054	TNF
Disease	4/674	0.182476	0.269043	1.85498	3.15558	HSPA5;FGF18;ITPR1;SNCA
Glucose metabolism	1/61	0.182853	0.269043	5.0959	8.65831	GYG1
Clathrin derived vesicle budding	1/61	0.182853	0.269043	5.0959	8.65831	HSPA8
FGF signaling pathway	1/61	0.182853	0.269043	5.0959	8.65831	FGF18
Shigellosis	1/62	0.185558	0.271826	5.01211	8.44234	RIPK2
O-linked glycosylation of mucins	1/63	0.188254	0.274571	4.93102	8.23463	MUC1
Apoptosis	2/242	0.190129	0.276079	2.56432	4.25691	IRAK1;TNF
Angiotensin II-stimulated signaling through G-proteins and beta-arrestin	1/64	0.190941	0.276079	4.8525	8.03474	ITPR1
Beta-1 integrin cell surface interactions	1/66	0.196289	0.278981	4.70272	7.65682	ITGAV
Destabilization of mRNA by AUF1 (hnRNP D0)	1/66	0.196289	0.278981	4.70272	7.65682	HSPA8
Thyroid-stimulating hormone signaling pathway	1/66	0.196289	0.278981	4.70272	7.65682	PDE4D
Endochondral ossification	1/66	0.196289	0.278981	4.70272	7.65682	FGF18
G alpha 13 pathway	1/67	0.19895	0.279199	4.63124	7.47806	NFKB2
Adipocytokine signaling pathway	1/67	0.19895	0.279199	4.63124	7.47806	TNF
SIDS susceptibility pathways	1/67	0.19895	0.279199	4.63124	7.47806	TNF
AP-1 transcription factor network	1/70	0.206881	0.283302	4.42921	6.97871	ACTA1
Signaling events mediated by HDAC class I	1/70	0.206881	0.283302	4.42921	6.97871	TNF
Signaling events mediated by VEGFR1 and VEGFR2	1/70	0.206881	0.283302	4.42921	6.97871	ITGAV
Long-term depression	1/70	0.206881	0.283302	4.42921	6.97871	ITPR1
Long-term potentiation	1/70	0.206881	0.283302	4.42921	6.97871	ITPR1
Phase II of biological oxidations: conjugation	1/71	0.209508	0.283302	4.36571	6.82359	NAT1
RIG-I-like receptor signaling pathway	1/71	0.209508	0.283302	4.36571	6.82359	TNF
Melanoma	1/71	0.209508	0.283302	4.36571	6.82359	FGF18
Mitochondrial pathway of apoptosis: multidomain Bcl-2 family	1/71	0.209508	0.283302	4.36571	6.82359	ITPR1
Myocyte adrenergic pathway	1/72	0.212126	0.285685	4.30401	6.6737	ITPR1
Signaling by NOTCH1	1/73	0.214735	0.286918	4.24402	6.52879	HEYL
Gastric acid secretion	1/74	0.217336	0.286918	4.18567	6.38864	ITPR1
Adherens junction cell adhesion	1/74	0.217336	0.286918	4.18567	6.38864	PTPRB
Integrins in angiogenesis	1/74	0.217336	0.286918	4.18567	6.38864	ITGAV
Wnt/calcium/cyclic GMP pathway	1/74	0.217336	0.286918	4.18567	6.38864	ITPR1
Arrhythmogenic right ventricular cardiomyopathy (ARVC)	1/75	0.219928	0.289197	4.1289	6.25303	ITGAV
RIG-I/MDA5-mediated induction of interferon-alpha/beta pathways	1/76	0.222512	0.291447	4.07364	6.12176	NFKB2
Transcriptional regulation of white adipocyte differentiation	1/77	0.225088	0.293669	4.01984	5.99465	TNF
Phosphatidylinositol signaling system	1/78	0.227655	0.295736	3.96743	5.8715	ITPR1
Antigen processing: cross presentation	1/79	0.230213	0.295736	3.91637	5.75216	ITGAV
Unfolded protein response	1/79	0.230213	0.295736	3.91637	5.75216	HSPA5
Fc epsilon receptor I signaling pathway	1/79	0.230213	0.295736	3.91637	5.75216	TNF
Insulin signaling pathway	2/277	0.232392	0.296729	2.23398	3.26011	TNF;GYG1
Apoptosis modulation and signaling	1/80	0.232764	0.296729	3.8666	5.63647	IRAK1
Platelet homeostasis	1/82	0.23784	0.300903	3.77075	5.4154	ITPR1
SMAD2/3 nuclear pathway	1/82	0.23784	0.300903	3.77075	5.4154	HSPA8
T cell signal transduction	1/83	0.240365	0.302951	3.72458	5.30975	NFKB2
Small cell lung cancer	1/84	0.242882	0.30383	3.67952	5.20718	ITGAV
ECM-receptor interaction	1/84	0.242882	0.30383	3.67952	5.20718	ITGAV
C-Myb transcription factor network	1/85	0.245391	0.304687	3.63553	5.10756	HSPA8
MicroRNAs in cardiomyocyte hypertrophy	1/85	0.245391	0.304687	3.63553	5.10756	TNF
mRNA stability regulation by proteins that bind AU-rich elements	1/86	0.247892	0.306652	3.59258	5.01079	HSPA8
Hematopoietic cell lineage	1/88	0.252869	0.311654	3.50964	4.82534	TNF
Salivary secretion	1/89	0.255346	0.31355	3.46958	4.73645	ITPR1
Gap junction pathway	1/90	0.257814	0.315421	3.43042	4.65	ITPR1
Neural crest differentiation	1/91	0.260274	0.317269	3.39214	4.56588	NFKB2
L1CAM interactions	1/94	0.267607	0.323843	3.28222	4.32673	ITGAV
Cell surface interactions at the vascular wall	1/94	0.267607	0.323843	3.28222	4.32673	ITGAV
Oncostatin M	2/311	0.27399	0.33037	1.98473	2.56956	HSPA5;ITGAV
Integrin-mediated cell adhesion	1/100	0.282059	0.338876	3.08236	3.90116	ITGAV
Pancreatic secretion	1/101	0.28444	0.339296	3.05138	3.83631	ITPR1
GnRH signaling pathway	1/101	0.28444	0.339296	3.05138	3.83631	ITPR1
Signaling by ERBB2	1/102	0.286813	0.340909	3.02102	3.77303	ITPR1
Amoebiasis	1/105	0.293887	0.345627	2.93343	3.59217	TNF
DNA repair	1/105	0.293887	0.345627	2.93343	3.59217	UBE2T
Fibroblast growth factor receptor pathway	1/105	0.293887	0.345627	2.93343	3.59217	FGF18
G alpha i pathway	1/108	0.300891	0.352623	2.85075	3.42378	ITPR1
Signaling by insulin receptor	1/109	0.303211	0.354099	2.82422	3.37022	FGF18
Interleukin-2 signaling pathway	4/847	0.305845	0.355759	1.46106	1.73089	NOP56;ID3;TNF;EZH2
Signaling by EGFR in cancer	1/111	0.307827	0.355759	2.77259	3.26671	ITPR1
Epidermal growth factor receptor (EGFR) pathway	1/111	0.307827	0.355759	2.77259	3.26671	ACTA1
Oocyte meiosis	1/113	0.312413	0.359814	2.7228	3.16778	ITPR1
CXCR4 signaling pathway	1/116	0.319237	0.365154	2.65137	3.02739	ITGAV
Vascular smooth muscle contraction	1/116	0.319237	0.365154	2.65137	3.02739	ITPR1
Prolactin regulation of apoptosis	1/118	0.323749	0.369051	2.60579	2.93877	HSPA5
Immunoregulatory interactions between a lymphoid and a non-lymphoid cell	1/119	0.325993	0.369091	2.58357	2.89587	ICAM4
Signaling by NOTCH	1/119	0.325993	0.369091	2.58357	2.89587	HEYL
G alpha s pathway	1/120	0.328231	0.370369	2.56173	2.85387	PDE4D
Signaling by PDGF	1/122	0.332684	0.37413	2.51914	2.77246	ITPR1
G alpha (s) signaling events	1/125	0.339309	0.377764	2.45782	2.65651	PDE4D
Integration of energy metabolism	1/125	0.339309	0.377764	2.45782	2.65651	ITPR1
Factors involved in megakaryocyte development and platelet production	1/125	0.339309	0.377764	2.45782	2.65651	HBD
PDGFB signaling pathway	1/129	0.348042	0.3862	2.38053	2.51248	ITGAV
Parkinson's disease	1/131	0.352366	0.389703	2.34367	2.44464	SNCA
Cell adhesion molecules (CAMs)	1/133	0.356662	0.391859	2.30793	2.3794	ITGAV
Membrane trafficking	1/133	0.356662	0.391859	2.30793	2.3794	HSPA8
NGF signaling via TRKA from the plasma membrane	1/136	0.363052	0.397285	2.2563	2.2861	ITPR1
Diabetes pathways	1/137	0.365169	0.397285	2.23959	2.25616	HSPA5
Natural killer cell-mediated cytotoxicity	1/137	0.365169	0.397285	2.23959	2.25616	TNF
Biological oxidations	1/139	0.369381	0.397978	2.20691	2.19792	NAT1
Systemic lupus erythematosus	1/139	0.369381	0.397978	2.20691	2.19792	TNF
T cell receptor signaling pathway	1/139	0.369381	0.397978	2.20691	2.19792	TNF
Calcium regulation in the cardiac cell	1/149	0.390031	0.418875	2.05676	1.9365	ITPR1
Signaling by the B cell receptor (BCR)	1/151	0.39408	0.421868	2.02913	1.88953	ITPR1
Phagosome	1/154	0.400104	0.426949	1.98904	1.82202	ITGAV
Integrin signaling pathway	1/155	0.402099	0.427711	1.97602	1.80027	ACTA1
Purine metabolism	1/164	0.419763	0.445082	1.86607	1.61987	PDE4D
Protein metabolism	2/442	0.430207	0.454712	1.38452	1.16782	NOP56;MUC1
Metapathway biotransformation	1/174	0.438787	0.462318	1.75731	1.44757	NAT1
Calcium signaling pathway	1/178	0.446223	0.468675	1.71725	1.38571	ITPR1
Huntington's disease	1/184	0.457196	0.478694	1.66045	1.29954	ITPR1
TGF-beta signaling pathway	1/185	0.459004	0.479085	1.65134	1.28589	TNF
Transmission across chemical synapses	1/190	0.467955	0.486906	1.60724	1.22051	HSPA8
Post-translational protein modification	1/196	0.478503	0.496336	1.55732	1.14789	MUC1
Jak-STAT signaling pathway	1/199	0.4837	0.500173	1.53349	1.11376	PTPRB
Endocytosis	1/201	0.487136	0.502172	1.518	1.09176	HSPA8
Gastrin-CREB signaling pathway via PKC and MAPK	1/206	0.495629	0.509354	1.4806	1.03928	ITPR1
Focal adhesion	1/233	0.539148	0.552379	1.3065	0.807108	ITGAV
Carbohydrate metabolism	1/235	0.542221	0.553828	1.2952	0.792769	GYG1
Neuroactive ligand-receptor interaction	1/272	0.595555	0.606449	1.11626	0.578517	CHRNA10
Neuronal system	1/283	0.610196	0.619469	1.07212	0.529602	HSPA8
Gene expression	3/968	0.625533	0.633115	0.936047	0.439148	HSPA8;MARS2;ADARB1
Axon guidance	1/325	0.66145	0.667445	0.931149	0.384864	ITGAV
Metabolism	4/1615	0.790586	0.795349	0.733786	0.172425	NAT1;ITPR1;MSMO1;GYG1
Lipid and lipoprotein metabolism	1/489	0.805329	0.807747	0.613052	0.132729	MSMO1
Signaling by GPCR	2/977	0.839445	0.839445	0.60766	0.106349	PDE4D;ITPR1

## Sheet: KEGG
Term	Overlap	P-value	Adjusted P-value	Odds Ratio	Combined Score	Genes
Lipid and atherosclerosis	5/215	0.000719036	0.0649921	7.69867	55.7199	HSPA8;IRAK1;HSPA5;ITPR1;TNF
Legionellosis	3/57	0.000884246	0.0649921	17.5309	123.256	HSPA8;TNF;NFKB2
Antigen processing and presentation	3/78	0.00218848	0.103517	12.6089	77.2238	HSPA8;HSPA5;TNF
MAPK signaling pathway	5/294	0.00285268	0.103517	5.57179	32.6479	HSPA8;IRAK1;FGF18;TNF;NFKB2
TGF-beta signaling pathway	3/94	0.00371425	0.103517	10.3836	58.1021	ID3;ACVR1B;TNF
C-type lectin receptor signaling pathway	3/104	0.00492936	0.103517	9.35078	49.6764	ITPR1;TNF;NFKB2
NF-kappa B signaling pathway	3/104	0.00492936	0.103517	9.35078	49.6764	IRAK1;TNF;NFKB2
Toxoplasmosis	3/112	0.00605538	0.111268	8.66099	44.23	HSPA8;IRAK1;TNF
Prion disease	4/273	0.012629	0.186712	4.71639	20.6189	HSPA8;HSPA5;ITPR1;TNF
Breast cancer	3/147	0.0127015	0.186712	6.54431	28.5727	HEYL;FGF18;NFKB2
Protein processing in endoplasmic reticulum	3/171	0.0189661	0.215591	5.60261	22.2149	HSPA8;HSPA5;SEC23B
Caffeine metabolism	1/6	0.0196397	0.215591	61.32	241	NAT1
Pathways of neurodegeneration	5/475	0.0202132	0.215591	3.39449	13.2433	HSPA5;ITPR1;TNF;TOMM40L;SNCA
Tuberculosis	3/180	0.0216845	0.215591	5.31531	20.3638	IRAK1;RIPK2;TNF
NOD-like receptor signaling pathway	3/181	0.0219991	0.215591	5.28518	20.1722	RIPK2;ITPR1;TNF
Thyroid hormone synthesis	2/75	0.0254997	0.21866	8.50214	31.1951	HSPA5;ITPR1
Pertussis	2/76	0.026134	0.21866	8.38682	30.5659	IRAK1;TNF
Leishmaniasis	2/77	0.0267746	0.21866	8.27458	29.9565	IRAK1;TNF
Epstein-Barr virus infection	3/202	0.0291826	0.222696	4.72242	16.6899	IRAK1;TNF;NFKB2
Proteoglycans in cancer	3/205	0.0302988	0.222696	4.65158	16.2649	ITPR1;ITGAV;TNF
Human immunodeficiency virus 1 infection	3/212	0.03299	0.23093	4.49419	15.3322	IRAK1;ITPR1;TNF
Hypertrophic cardiomyopathy	2/90	0.0356636	0.238297	7.04759	23.494	ITGAV;TNF
Human cytomegalovirus infection	3/225	0.0383087	0.241105	4.22823	13.7928	ITPR1;ITGAV;TNF
Dilated cardiomyopathy	2/96	0.0400997	0.241105	6.59574	21.2145	ITGAV;TNF
Chagas disease	2/102	0.0447332	0.241105	6.19813	19.2578	IRAK1;TNF
Toll-like receptor signaling pathway	2/104	0.04632	0.241105	6.07598	18.6665	IRAK1;TNF
Shigellosis	3/246	0.0477678	0.241105	3.85871	11.7359	RIPK2;ITPR1;TNF
Parathyroid hormone synthesis, secretion and action	2/106	0.0479273	0.241105	5.95853	18.1024	PDE4D;ITPR1
Salmonella infection	3/249	0.049205	0.241105	3.81107	11.478	IRAK1;RIPK2;TNF
Parkinson disease	3/249	0.049205	0.241105	3.81107	11.478	HSPA5;ITPR1;SNCA
Selenocompound metabolism	1/17	0.0546642	0.259214	19.1519	55.666	2002-03-01
Neurotrophin signaling pathway	2/119	0.0588539	0.27036	5.293	14.9935	IRAK1;RIPK2
Steroid biosynthesis	1/20	0.0640005	0.27685	16.1255	44.3268	MSMO1
Osteoclast differentiation	2/127	0.0659651	0.27685	4.95225	13.4633	TNF;NFKB2
Protein export	1/23	0.073246	0.27685	13.9245	36.3976	HSPA5
Cytokine-cytokine receptor interaction	3/295	0.0738127	0.27685	3.2032	8.34825	TNFRSF18;ACVR1B;TNF
Yersinia infection	2/137	0.0752336	0.27685	4.5831	11.8572	IRAK1;TNF
Estrogen signaling pathway	2/137	0.0752336	0.27685	4.5831	11.8572	HSPA8;ITPR1
Fluid shear stress and atherosclerosis	2/139	0.077135	0.27685	4.51574	11.5702	ITGAV;TNF
Measles	2/139	0.077135	0.27685	4.51574	11.5702	HSPA8;IRAK1
Apoptosis	2/142	0.0800157	0.27685	4.4183	11.1586	ITPR1;TNF
Signaling pathways regulating pluripotency of stem cells	2/143	0.0809833	0.27685	4.38675	11.0261	ID3;ACVR1B
Spinocerebellar ataxia	2/143	0.0809833	0.27685	4.38675	11.0261	NOP56;ITPR1
Spliceosome	2/150	0.087858	0.293526	4.17779	10.1605	HSPA8;PPIL1
mTOR signaling pathway	2/154	0.0918628	0.294086	4.06702	9.70985	TBC1D7;TNF
Hepatitis C	2/157	0.0949013	0.294086	3.9877	9.39071	IFIT1B;TNF
Human papillomavirus infection	3/331	0.0962055	0.294086	2.8464	6.66419	HEYL;ITGAV;TNF
Asthma	1/31	0.0974633	0.294086	10.2072	23.7652	TNF
Pathways in cancer	4/531	0.0982102	0.294086	2.37583	5.51347	HEYL;FGF18;ITGAV;NFKB2
Hepatitis B	2/162	0.100029	0.294086	3.86211	8.8917	IRAK1;TNF
Starch and sucrose metabolism	1/36	0.112281	0.323597	8.74681	19.1271	GYG1
African trypanosomiasis	1/37	0.115216	0.323597	8.50342	18.3754	TNF
Allograft rejection	1/38	0.118141	0.323597	8.27318	17.6705	TNF
Amyotrophic lateral sclerosis	3/364	0.118872	0.323597	2.58185	5.49858	HSPA5;TNF;TOMM40L
Alzheimer disease	3/369	0.122469	0.327327	2.54593	5.34618	ITPR1;TNF;SNCA
Ferroptosis	1/41	0.12686	0.333007	7.65154	15.7979	FTMT
Graft-versus-host disease	1/42	0.129747	0.334611	7.46454	15.2438	TNF
Type I diabetes mellitus	1/43	0.132625	0.336136	7.28645	14.7203	TNF
Pathogenic Escherichia coli infection	2/197	0.137862	0.343486	3.1633	6.26809	IRAK1;TNF
Type II diabetes mellitus	1/46	0.141203	0.345946	6.79966	13.3107	TNF
Malaria	1/50	0.152509	0.367523	6.24333	11.7408	TNF
Regulation of actin cytoskeleton	2/218	0.16186	0.375451	2.85272	5.19486	FGF18;ITGAV
Human T-cell leukemia virus 1 infection	2/219	0.163022	0.375451	2.83943	5.15035	TNF;NFKB2
Fanconi anemia pathway	1/54	0.16367	0.375451	5.77097	10.4449	UBE2T
Notch signaling pathway	1/59	0.177416	0.375451	5.27215	9.11689	HEYL
Coronavirus disease	2/232	0.178259	0.375451	2.67717	4.61683	IRAK1;TNF
Ras signaling pathway	2/232	0.178259	0.375451	2.67717	4.61683	FGF18;PLA1A
Long-term depression	1/60	0.180139	0.375451	5.18253	8.88299	ITPR1
Chemical carcinogenesis	2/239	0.186556	0.375451	2.59718	4.36073	NAT1;FGF18
Calcium signaling pathway	2/240	0.187746	0.375451	2.58613	4.32574	FGF18;ITPR1
Lysine degradation	1/63	0.188254	0.375451	4.93102	8.23463	EZH2
GnRH secretion	1/64	0.190941	0.375451	4.8525	8.03474	ITPR1
Cortisol synthesis and secretion	1/65	0.193619	0.375451	4.77644	7.84226	ITPR1
Inflammatory bowel disease	1/65	0.193619	0.375451	4.77644	7.84226	TNF
Aminoacyl-tRNA biosynthesis	1/66	0.196289	0.375451	4.70272	7.65682	2002-03-01
Long-term potentiation	1/67	0.19895	0.375451	4.63124	7.47806	ITPR1
Fc epsilon RI signaling pathway	1/68	0.201602	0.375451	4.56188	7.30566	TNF
Adipocytokine signaling pathway	1/69	0.204246	0.375451	4.49457	7.13931	TNF
Renin secretion	1/69	0.204246	0.375451	4.49457	7.13931	ITPR1
Central carbon metabolism in cancer	1/70	0.206881	0.375451	4.42921	6.97871	SCO2
RIG-I-like receptor signaling pathway	1/70	0.206881	0.375451	4.42921	6.97871	TNF
Adherens junction	1/71	0.209508	0.375581	4.36571	6.82359	PTPRB
Melanoma	1/72	0.212126	0.375692	4.30401	6.6737	FGF18
Gastric acid secretion	1/76	0.222512	0.389269	4.07364	6.12176	ITPR1
Arrhythmogenic right ventricular cardiomyopathy	1/77	0.225088	0.389269	4.01984	5.99465	ITGAV
ECM-receptor interaction	1/88	0.252869	0.405399	3.50964	4.82534	ITGAV
Gap junction	1/88	0.252869	0.405399	3.50964	4.82534	ITPR1
Morphine addiction	1/91	0.260274	0.405399	3.39214	4.56588	PDE4D
Small cell lung cancer	1/92	0.262727	0.405399	3.35469	4.48402	ITGAV
Salivary secretion	1/93	0.265171	0.405399	3.31806	4.40433	ITPR1
GnRH signaling pathway	1/93	0.265171	0.405399	3.31806	4.40433	ITPR1
Rheumatoid arthritis	1/93	0.265171	0.405399	3.31806	4.40433	TNF
IL-17 signaling pathway	1/94	0.267607	0.405399	3.28222	4.32673	TNF
Circadian entrainment	1/97	0.274868	0.405399	3.17917	4.10578	ITPR1
Phosphatidylinositol signaling system	1/97	0.274868	0.405399	3.17917	4.10578	ITPR1
Aldosterone synthesis and secretion	1/98	0.277273	0.405399	3.14623	4.03584	ITPR1
Glycerophospholipid metabolism	1/98	0.277273	0.405399	3.14623	4.03584	PLA1A
Inflammatory mediator regulation of TRP channels	1/98	0.277273	0.405399	3.14623	4.03584	ITPR1
Hematopoietic cell lineage	1/99	0.27967	0.405399	3.11397	3.96766	TNF
AGE-RAGE signaling pathway in diabetic complications	1/100	0.282059	0.405399	3.08236	3.90116	TNF
Viral protein interaction with cytokine and cytokine receptor	1/100	0.282059	0.405399	3.08236	3.90116	TNF
Amoebiasis	1/102	0.286813	0.405399	3.02102	3.77303	TNF
Longevity regulating pathway	1/102	0.286813	0.405399	3.02102	3.77303	HSPA8
Pancreatic secretion	1/102	0.286813	0.405399	3.02102	3.77303	ITPR1
T cell receptor signaling pathway	1/104	0.291536	0.405789	2.96206	3.65101	TNF
Glucagon signaling pathway	1/107	0.298564	0.405789	2.87779	3.4786	ITPR1
Drug metabolism	1/108	0.300891	0.405789	2.85075	3.42378	NAT1
Insulin resistance	1/108	0.300891	0.405789	2.85075	3.42378	TNF
Ribosome biogenesis in eukaryotes	1/108	0.300891	0.405789	2.85075	3.42378	NOP56
TNF signaling pathway	1/112	0.310124	0.409382	2.74747	3.21669	TNF
Serotonergic synapse	1/113	0.312413	0.409382	2.7228	3.16778	ITPR1
Cholinergic synapse	1/113	0.312413	0.409382	2.7228	3.16778	ITPR1
Glutamatergic synapse	1/114	0.314695	0.409382	2.69857	3.11995	ITPR1
Sphingolipid signaling pathway	1/119	0.325993	0.413729	2.58357	2.89587	TNF
Growth hormone synthesis, secretion and action	1/119	0.325993	0.413729	2.58357	2.89587	ITPR1
PI3K-Akt signaling pathway	2/354	0.32648	0.413729	1.73846	1.94601	FGF18;ITGAV
Thyroid hormone signaling pathway	1/121	0.330461	0.415195	2.54026	2.81274	ITGAV
Platelet activation	1/124	0.337108	0.419957	2.47792	2.69437	ITPR1
Oocyte meiosis	1/129	0.348042	0.42603	2.38053	2.51248	ITPR1
Purine metabolism	1/129	0.348042	0.42603	2.38053	2.51248	PDE4D
Natural killer cell mediated cytotoxicity	1/131	0.352366	0.42603	2.34367	2.44464	TNF
Dopaminergic synapse	1/132	0.354517	0.42603	2.32566	2.4117	ITPR1
Vascular smooth muscle contraction	1/133	0.356662	0.42603	2.30793	2.3794	ITPR1
Systemic lupus erythematosus	1/135	0.360929	0.42603	2.27325	2.31661	TNF
Apelin signaling pathway	1/137	0.365169	0.42603	2.23959	2.25616	ITPR1
Autophagy	1/137	0.365169	0.42603	2.23959	2.25616	ITPR1
Cell adhesion molecules	1/148	0.387996	0.443291	2.07085	1.9606	ITGAV
Retrograde endocannabinoid signaling	1/148	0.387996	0.443291	2.07085	1.9606	ITPR1
Gastric cancer	1/149	0.390031	0.443291	2.05676	1.9365	FGF18
Phagosome	1/152	0.396095	0.443291	2.01559	1.86664	ITGAV
Oxytocin signaling pathway	1/154	0.400104	0.443291	1.98904	1.82202	ITPR1
Cushing syndrome	1/155	0.402099	0.443291	1.97602	1.80027	ITPR1
Non-alcoholic fatty liver disease	1/155	0.402099	0.443291	1.97602	1.80027	TNF
Cellular senescence	1/156	0.404088	0.443291	1.96318	1.77888	ITPR1
Necroptosis	1/159	0.410014	0.44646	1.92561	1.7168	TNF
cGMP-PKG signaling pathway	1/167	0.425536	0.459954	1.83207	1.56533	ITPR1
Influenza A	1/172	0.435032	0.466786	1.77805	1.47993	TNF
Kaposi sarcoma-associated herpesvirus infection	1/193	0.473255	0.50412	1.58189	1.18345	ITPR1
Focal adhesion	1/201	0.487136	0.51281	1.518	1.09176	ITGAV
Viral carcinogenesis	1/203	0.49055	0.51281	1.50282	1.07035	NFKB2
Herpes simplex virus 1 infection	2/498	0.491879	0.51281	1.22467	0.868932	IRAK1;TNF
Rap1 signaling pathway	1/210	0.502323	0.52001	1.45197	0.999699	FGF18
cAMP signaling pathway	1/216	0.5122	0.526527	1.41102	0.94403	PDE4D
Endocytosis	1/252	0.567535	0.579358	1.20644	0.683389	HSPA8
Huntington disease	1/306	0.639143	0.647958	0.990113	0.443202	ITPR1
MicroRNAs in cancer	1/310	0.643956	0.648367	0.977097	0.430045	EZH2
Neuroactive ligand-receptor interaction	1/341	0.679177	0.679177	0.886606	0.343005	CHRNA10

## Sheet: Go.BP
Term	Overlap	P-value	Adjusted P-value	Odds Ratio	Combined Score	Genes
Canonical NF-kappaB Signal Transduction (GO:0007249)	3/36	0.000226703	0.0909391	28.7172	240.991	IRAK1;RIPK2;NFKB2
Cellular Response to Epinephrine Stimulus (GO:0071872)	2/8	0.000296484	0.0909391	103.792	843.153	PDE4D;SNCA
Import Into the Mitochondrion (GO:0170036)	3/43	0.000385434	0.0909391	23.6833	186.178	SLC25A39;ITPR1;TOMM40L
Negative Regulation of Lipid Localization (GO:1905953)	2/10	0.000474465	0.0909391	77.8359	595.703	ITGAV;TNF
Regulation of Leukocyte Adhesion to Vascular Endothelial Cell (GO:1904994)	2/12	0.000692924	0.0909391	62.2625	452.934	IRAK1;TNF
Regulation of Release of Sequestered Calcium Ion Into Cytosol (GO:0051279)	3/53	0.000714629	0.0909391	18.9371	137.176	PDE4D;JPH1;SNCA
Response to Iron Ion (GO:0010039)	2/13	0.000817168	0.0909391	56.5994	402.403	SLC25A39;SNCA
Positive Regulation of MAP Kinase Activity (GO:0043406)	3/66	0.00135396	0.117221	15.0197	99.2007	FGF18;TNF;EZH2
Positive Regulation of Leukocyte Adhesion to Vascular Endothelial Cell (GO:1904996)	2/17	0.00141272	0.117221	41.4979	272.319	IRAK1;TNF
Negative Regulation of Lipid Storage (GO:0010888)	2/19	0.00176875	0.117221	36.6121	232.029	ITGAV;TNF
Microglial Cell Activation (GO:0001774)	2/19	0.00176875	0.117221	36.6121	232.029	TNF;SNCA
Regulation of MAP Kinase Activity (GO:0043405)	3/73	0.00181029	0.117221	13.5129	85.3242	FGF18;TNF;EZH2
Positive Regulation of Protein Serine/Threonine Kinase Activity (GO:0071902)	3/75	0.0019562	0.117221	13.1362	81.9275	FGF18;TNF;EZH2
Negative Regulation of Cellular Component Organization (GO:0051129)	3/80	0.00235244	0.123299	12.2801	74.3232	HSPA8;HSPA5;TNF
ERK1 and ERK2 Cascade (GO:0070371)	2/22	0.00237417	0.123299	31.1156	188.035	RIPK2;ITGAV
Regulation of Lipid Storage (GO:0010883)	2/24	0.00282464	0.125614	28.2841	166.01	ITGAV;TNF
Negative Regulation of Intracellular Signal Transduction (GO:1902532)	5/297	0.00297968	0.125614	5.5137	32.0673	IRAK1;CARD19;TBC1D7;ITPR1;EZH2
Regulation of Protein Transport (GO:0051223)	2/25	0.00306375	0.125614	27.053	156.586	HSPA8;TNF
Chaperone Cofactor-Dependent Protein Refolding (GO:0051085)	2/25	0.00306375	0.125614	27.053	156.586	HSPA8;HSPA5
Positive Regulation of Cell Adhesion (GO:0045785)	3/92	0.00349604	0.136171	10.618	60.0566	TNFRSF18;ITGAV;TNF
Positive Regulation of Leukocyte Migration (GO:0002687)	2/28	0.00383581	0.14229	23.9279	133.12	TNFRSF18;TNF
Cell Surface Toll-Like Receptor Signaling Pathway (GO:0140895)	2/30	0.00439553	0.149694	22.2165	120.573	IRAK1;RIPK2
Negative Regulation of RNA Biosynthetic Process (GO:1902679)	6/470	0.0045089	0.149694	4.19612	22.6662	HSPA8;HEYL;ID3;BCOR;TNF;EZH2
Positive Regulation of Signaling (GO:0023056)	2/31	0.00468871	0.149694	21.4494	115.024	TNF;SNCA
Regulation of Macrophage Derived Foam Cell Differentiation (GO:0010743)	2/32	0.00499069	0.149694	20.7333	109.89	ITGAV;TNF
Positive Regulation of Cell Migration (GO:0030335)	5/344	0.00554456	0.149694	4.7379	24.6131	HSPA8;HSPA5;TNFRSF18;ACVR1B;EZH2
Negative Regulation of DNA-templated Transcription (GO:0045892)	9/1006	0.00558586	0.149694	2.99905	15.5576	HSPA8;HEYL;MUC1;ID3;BCOR;TNF;MAGEA6;SNCA;EZH2
Sarcomere Organization (GO:0045214)	2/34	0.00562082	0.149694	19.4355	100.701	FMNL3;WDR1
Macrophage Activation (GO:0042116)	2/35	0.00594886	0.149694	18.8456	96.5756	TNF;SNCA
Negative Regulation of Cell Differentiation (GO:0045596)	4/220	0.00602927	0.149694	5.88949	30.1019	ITGAV;ACVR1B;TNF;TENT5C
'De Novo' Post-Translational Protein Folding (GO:0051084)	2/36	0.00628546	0.149694	18.2904	92.7237	HSPA8;HSPA5
Regulation of Microtubule Cytoskeleton Organization (GO:0070507)	2/38	0.00698412	0.149694	17.2726	85.7431	TRIM36;SNCA
Negative Regulation of Transport (GO:0051051)	2/38	0.00698412	0.149694	17.2726	85.7431	ITGAV;SNCA
Negative Regulation of G Protein-Coupled Receptor Signaling Pathway (GO:0045744)	2/39	0.00734606	0.149694	16.8049	82.5724	PDE4D;SNCA
Regulation of Protein-Containing Complex Assembly (GO:0043254)	3/126	0.00837017	0.149694	7.66976	36.6851	HSPA8;HSPA5;TNF
Positive Regulation of Programmed Cell Death (GO:0043068)	4/248	0.00912058	0.149694	5.20624	24.4549	TCTN3;ITPR1;TNF;SNCA
Regulation of Microtubule-Based Process (GO:0032886)	2/44	0.00927967	0.149694	14.8006	69.2657	TRIM36;SNCA
Regulation of Nervous System Development (GO:0051960)	2/45	0.00969076	0.149694	14.4557	67.0249	HEYL;SCO2
Positive Regulation of Leukocyte Cell-Cell Adhesion (GO:1903039)	2/48	0.0109718	0.149694	13.5109	60.9668	IRAK1;TNF
Cellular Response to Starvation (GO:0009267)	3/141	0.0113562	0.149694	6.83092	30.5888	HSPA8;HSPA5;TBC1D7
Actin Polymerization or Depolymerization (GO:0008154)	2/49	0.0114145	0.149694	13.2227	59.1436	WDR1;AVIL
Positive Regulation of Transport (GO:0051050)	2/49	0.0114145	0.149694	13.2227	59.1436	TNF;SNCA
Regulation of Cell Adhesion (GO:0030155)	3/142	0.0115744	0.149694	6.78143	30.2381	TNFRSF18;ITGAV;TNF
Regulation of Canonical NF-kappaB Signal Transduction (GO:0043122)	4/270	0.0121686	0.149694	4.77031	21.0318	IRAK1;RIPK2;CARD19;TNF
Myofibril Assembly (GO:0030239)	2/51	0.0123233	0.149694	12.6818	55.7524	FMNL3;WDR1
Positive Regulation of Interleukin-1 Beta Production (GO:0032731)	2/56	0.0147284	0.149694	11.5046	48.5263	RIPK2;TNF
Positive Regulation of Protein Localization to Cell Periphery (GO:1904377)	2/57	0.0152318	0.149694	11.2949	47.262	TNF;SNCA
Regulation of Blood Vessel Endothelial Cell Migration (GO:0043535)	2/57	0.0152318	0.149694	11.2949	47.262	FGF18;TNF
Negative Regulation of Protein-Containing Complex Assembly (GO:0031333)	2/59	0.0162607	0.149694	10.8975	44.8868	HSPA8;HSPA5
Response to Interleukin-1 (GO:0070555)	2/59	0.0162607	0.149694	10.8975	44.8868	IRAK1;SNCA
Regulation of Endothelial Cell Chemotaxis to Fibroblast Growth Factor (GO:2000544)	1/5	0.016393	0.149694	76.6538	315.117	FGF18
Negative Regulation of Lipid Transport (GO:0032369)	1/5	0.016393	0.149694	76.6538	315.117	ITGAV
Regulation of Inositol Phosphate Biosynthetic Process (GO:0010919)	1/5	0.016393	0.149694	76.6538	315.117	SNCA
Negative Regulation of Morphogenesis of an Epithelium (GO:1905331)	1/5	0.016393	0.149694	76.6538	315.117	TNF
Adenosine to Inosine Editing (GO:0006382)	1/5	0.016393	0.149694	76.6538	315.117	ADARB1
Negative Regulation of Relaxation of Muscle (GO:1901078)	1/5	0.016393	0.149694	76.6538	315.117	PDE4D
Regulation of Relaxation of Cardiac Muscle (GO:1901897)	1/5	0.016393	0.149694	76.6538	315.117	PDE4D
Peptidyl-Proline Modification (GO:0018208)	1/5	0.016393	0.149694	76.6538	315.117	PPIL1
Regulation of Synaptic Vesicle Recycling (GO:1903421)	1/5	0.016393	0.149694	76.6538	315.117	SNCA
Regulation of Tooth Mineralization (GO:0070170)	1/5	0.016393	0.149694	76.6538	315.117	BCOR
Regulation of Transmission of Nerve Impulse (GO:0051969)	1/5	0.016393	0.149694	76.6538	315.117	SCO2
Regulation of Vitamin D Biosynthetic Process (GO:0060556)	1/5	0.016393	0.149694	76.6538	315.117	TNF
Chronic Inflammatory Response (GO:0002544)	1/5	0.016393	0.149694	76.6538	315.117	TNF
Dopamine Biosynthetic Process (GO:0042416)	1/5	0.016393	0.149694	76.6538	315.117	SNCA
Eating Behavior (GO:0042755)	1/5	0.016393	0.149694	76.6538	315.117	RIPK2
Embryonic Brain Development (GO:1990403)	1/5	0.016393	0.149694	76.6538	315.117	PPIL1
Positive Regulation of Fever Generation (GO:0031622)	1/5	0.016393	0.149694	76.6538	315.117	TNF
Toll-Like Receptor 2 Signaling Pathway (GO:0034134)	1/5	0.016393	0.149694	76.6538	315.117	RIPK2
Positive Regulation of Podosome Assembly (GO:0071803)	1/5	0.016393	0.149694	76.6538	315.117	TNF
Inflammatory Response to Wounding (GO:0090594)	1/5	0.016393	0.149694	76.6538	315.117	TNF
Protein Targeting to Vacuole Involved in Autophagy (GO:0071211)	1/5	0.016393	0.149694	76.6538	315.117	HSPA8
Negative Regulation of IRE1-mediated Unfolded Protein Response (GO:1903895)	1/5	0.016393	0.149694	76.6538	315.117	HSPA5
Negative Regulation of Calcium-Mediated Signaling (GO:0050849)	1/5	0.016393	0.149694	76.6538	315.117	ITPR1
Positive Regulation of Cellular Process (GO:0048522)	6/622	0.0165773	0.149694	3.13604	12.8569	FTMT;TNFRSF18;FGF18;ITGAV;TNF;EZH2
Negative Regulation of Protein Kinase Activity (GO:0006469)	2/60	0.016786	0.149694	10.7091	43.7702	ADARB1;SNCA
Regulation of Reactive Oxygen Species Metabolic Process (GO:2000377)	2/61	0.0173184	0.149694	10.527	42.6974	TNF;SNCA
Negative Regulation of Canonical NF-kappaB Signal Transduction (GO:0043124)	2/61	0.0173184	0.149694	10.527	42.6974	IRAK1;CARD19
Positive Regulation of Interleukin-1 Production (GO:0032732)	2/63	0.0184048	0.149694	10.1808	40.6739	RIPK2;TNF
Positive Regulation of Peptidyl-Tyrosine Phosphorylation (GO:0050731)	2/63	0.0184048	0.149694	10.1808	40.6739	RIPK2;TNFRSF18
Regulation of Endocytosis (GO:0030100)	2/65	0.0195193	0.149694	9.85665	38.7992	ITGAV;SNCA
Regulation of Extrinsic Apoptotic Signaling Pathway (GO:2001236)	2/65	0.0195193	0.149694	9.85665	38.7992	ITGAV;TNF
Negative Regulation of Autophagy (GO:0010507)	2/65	0.0195193	0.149694	9.85665	38.7992	MAGEA6;SNCA
Regulation of Digestive System Process (GO:0044058)	1/6	0.0196397	0.149694	61.32	241	SCO2
Regulation of Entry of Bacterium Into Host Cell (GO:2000535)	1/6	0.0196397	0.149694	61.32	241	ITGAV
Negative Regulation of Retinoic Acid Receptor Signaling Pathway (GO:0048387)	1/6	0.0196397	0.149694	61.32	241	EZH2
Regulation of Protein Depolymerization (GO:1901879)	1/6	0.0196397	0.149694	61.32	241	WDR1
Cellular Response to Iron Ion (GO:0071281)	1/6	0.0196397	0.149694	61.32	241	SLC25A39
Subtelomeric Heterochromatin Formation (GO:0031509)	1/6	0.0196397	0.149694	61.32	241	EZH2
Positive Regulation of Gliogenesis (GO:0014015)	1/6	0.0196397	0.149694	61.32	241	TNF
Synaptic Transmission, Dopaminergic (GO:0001963)	1/6	0.0196397	0.149694	61.32	241	SNCA
Positive Regulation of Interleukin-5 Production (GO:0032754)	1/6	0.0196397	0.149694	61.32	241	PDE4D
Toll-Like Receptor 9 Signaling Pathway (GO:0034162)	1/6	0.0196397	0.149694	61.32	241	IRAK1
Regulation of Calcidiol 1-Monooxygenase Activity (GO:0060558)	1/6	0.0196397	0.149694	61.32	241	TNF
Positive Regulation of Apoptotic Process (GO:0043065)	4/313	0.0198561	0.149694	4.0975	16.0591	TCTN3;ITPR1;TNF;SNCA
Regulation of Neurogenesis (GO:0050767)	2/66	0.0200869	0.149694	9.70215	37.9129	HEYL;TNF
Regulation of Viral Genome Replication (GO:0045069)	2/66	0.0200869	0.149694	9.70215	37.9129	ADARB1;TNF
Neurogenesis (GO:0022008)	2/67	0.0206615	0.149694	9.5524	37.0584	FGF18;TRAK1
Response to Molecule of Bacterial Origin (GO:0002237)	2/67	0.0206615	0.149694	9.5524	37.0584	IRAK1;SNCA
Regulation of Cell Migration (GO:0030334)	5/479	0.0208732	0.149694	3.36515	13.0207	HSPA8;HSPA5;FGF18;ADARB1;EZH2
Extrinsic Apoptotic Signaling Pathway (GO:0097191)	2/68	0.0212429	0.149694	9.4072	36.234	ITGAV;TNF
Positive Regulation of Type I Interferon Production (GO:0032481)	2/68	0.0212429	0.149694	9.4072	36.234	IRAK1;RIPK2
Positive Regulation of Cell Population Proliferation (GO:0008284)	5/484	0.021718	0.149694	3.32917	12.7494	FTMT;FGF18;ITGAV;TNF;EZH2
Cell Junction Organization (GO:0034330)	2/69	0.021831	0.149694	9.26632	35.4383	CBLN2;SNCA
Positive Regulation of Cytokine Production (GO:0001819)	4/325	0.0224346	0.149694	3.94192	14.968	IRAK1;RIPK2;PDE4D;TNF
Regulation of Dopamine Uptake Involved in Synaptic Transmission (GO:0051584)	1/7	0.0228758	0.149694	51.0974	193.03	SNCA
Regulatory ncRNA-mediated Heterochromatin Formation (GO:0031048)	1/7	0.0228758	0.149694	51.0974	193.03	EZH2
Positive Regulation of Inositol Phosphate Biosynthetic Process (GO:0060732)	1/7	0.0228758	0.149694	51.0974	193.03	SNCA
Positive Regulation of Protein K63-linked Ubiquitination (GO:1902523)	1/7	0.0228758	0.149694	51.0974	193.03	RIPK2
Positive Regulation of Steroid Biosynthetic Process (GO:0010893)	1/7	0.0228758	0.149694	51.0974	193.03	TNF
Interleukin-33-Mediated Signaling Pathway (GO:0038172)	1/7	0.0228758	0.149694	51.0974	193.03	IRAK1
Negative Regulation of Amyloid-Beta Clearance (GO:1900222)	1/7	0.0228758	0.149694	51.0974	193.03	TNF
Regulation of Chaperone-Mediated Autophagy (GO:1904714)	1/7	0.0228758	0.149694	51.0974	193.03	SNCA
Negative Regulation of Extrinsic Apoptotic Signaling Pathway (GO:2001237)	2/72	0.0236357	0.149694	8.86786	33.2101	ITGAV;TNF
Embryonic Organ Development (GO:0048568)	2/73	0.0242505	0.149694	8.74252	32.5162	PPIL1;TNF
Calcium Ion Transmembrane Import Into Cytosol (GO:0097553)	2/74	0.0248719	0.149694	8.62066	31.8449	ITPR1;JPH1
Negative Regulation of Apoptotic Signaling Pathway (GO:2001234)	2/74	0.0248719	0.149694	8.62066	31.8449	ITGAV;TNF
Regulation of Endoplasmic Reticulum Unfolded Protein Response (GO:1900101)	1/8	0.0261014	0.149694	43.7956	159.668	HSPA5
Regulation of Endothelial Cell Development (GO:1901550)	1/8	0.0261014	0.149694	43.7956	159.668	TNF
Regulation of Glial Cell Proliferation (GO:0060251)	1/8	0.0261014	0.149694	43.7956	159.668	TNF
Negative Regulation of Production of Molecular Mediator of Immune Response (GO:0002701)	1/8	0.0261014	0.149694	43.7956	159.668	TNF
Negative Regulation of Protein-Containing Complex Disassembly (GO:0043242)	1/8	0.0261014	0.149694	43.7956	159.668	TNF
Regulation of Nervous System Process (GO:0031644)	1/8	0.0261014	0.149694	43.7956	159.668	SCO2
Regulation of Podosome Assembly (GO:0071801)	1/8	0.0261014	0.149694	43.7956	159.668	TNF
Calcium Ion Transport Into Cytosol (GO:0060402)	1/8	0.0261014	0.149694	43.7956	159.668	JPH1
Nucleotide-Binding Oligomerization Domain Containing 2 Signaling Pathway (GO:0070431)	1/8	0.0261014	0.149694	43.7956	159.668	RIPK2
Phosphatidylserine Acyl-Chain Remodeling (GO:0036150)	1/8	0.0261014	0.149694	43.7956	159.668	PLA1A
Release of Sequestered Calcium Ion Into Cytosol by Endoplasmic Reticulum (GO:1903514)	1/8	0.0261014	0.149694	43.7956	159.668	ITPR1
Response to Magnesium Ion (GO:0032026)	1/8	0.0261014	0.149694	43.7956	159.668	SNCA
Positive Regulation of Chemokine (C-X-C Motif) Ligand 2 Production (GO:2000343)	1/8	0.0261014	0.149694	43.7956	159.668	TNF
Dopamine Uptake (GO:0090494)	1/8	0.0261014	0.149694	43.7956	159.668	SNCA
Epithelial to Mesenchymal Transition Involved in Endocardial Cushion Formation (GO:0003198)	1/8	0.0261014	0.149694	43.7956	159.668	HEYL
Positive Regulation of Lyase Activity (GO:0051349)	1/8	0.0261014	0.149694	43.7956	159.668	FTMT
Positive Regulation of Vesicle Fusion (GO:0031340)	1/8	0.0261014	0.149694	43.7956	159.668	SNCA
Maintenance of Synapse Structure (GO:0099558)	1/8	0.0261014	0.149694	43.7956	159.668	CBLN2
Negative Regulation of Supramolecular Fiber Organization (GO:1902904)	2/76	0.026134	0.149694	8.38682	30.5659	HSPA8;SNCA
Positive Regulation of Protein Ubiquitination (GO:0031398)	2/76	0.026134	0.149694	8.38682	30.5659	RIPK2;TBC1D7
Positive Regulation of Protein Modification by Small Protein Conjugation or Removal (GO:1903322)	2/79	0.028075	0.153114	8.05885	28.7933	RIPK2;TBC1D7
Regulation of Apoptotic Process (GO:0042981)	6/704	0.0283865	0.153114	2.75587	9.81599	BCL2L12;HSPA5;TCTN3;ITPR1;TNF;SNCA
Regulation of Cell Differentiation (GO:0045595)	3/201	0.0288156	0.153114	4.74651	16.8351	ACVR1B;TNF;TENT5C
SNARE Complex Assembly (GO:0035493)	1/9	0.0293166	0.153114	38.3192	135.252	SNCA
Nucleoside Metabolic Process (GO:0009116)	1/9	0.0293166	0.153114	38.3192	135.252	SCO2
Regulation of Vascular Wound Healing (GO:0061043)	1/9	0.0293166	0.153114	38.3192	135.252	TNF
Cellular Response to Muramyl Dipeptide (GO:0071225)	1/9	0.0293166	0.153114	38.3192	135.252	RIPK2
Glucan Biosynthetic Process (GO:0009250)	1/9	0.0293166	0.153114	38.3192	135.252	GYG1
Glycogen Biosynthetic Process (GO:0005978)	1/9	0.0293166	0.153114	38.3192	135.252	GYG1
Positive Regulation of Receptor Recycling (GO:0001921)	1/9	0.0293166	0.153114	38.3192	135.252	SNCA
Regulation of Actin Filament-Based Movement (GO:1903115)	1/9	0.0293166	0.153114	38.3192	135.252	PDE4D
Negative Regulation of PERK-mediated Unfolded Protein Response (GO:1903898)	1/9	0.0293166	0.153114	38.3192	135.252	HSPA5
Negative Regulation of Cell Adhesion Mediated by Integrin (GO:0033629)	1/9	0.0293166	0.153114	38.3192	135.252	MUC1
Intracellular Signaling Cassette (GO:0141124)	4/354	0.0294828	0.153114	3.60995	12.7213	IRAK1;RIPK2;PDE4D;NFKB2
Positive Regulation of Canonical NF-kappaB Signal Transduction (GO:0043123)	3/204	0.0299242	0.15412	4.67496	16.4048	IRAK1;RIPK2;TNF
Regulation of Interleukin-1 Beta Production (GO:0032651)	2/82	0.0300722	0.15412	7.75547	27.1764	RIPK2;TNF
Regulation of Transcription by RNA Polymerase II (GO:0006357)	13/2250	0.0306388	0.154617	1.94044	6.7634	HSPA5;RIPK2;TRAK1;TNF;NFKB2;BCL2L12;HEYL;MUC1;ID3;BCOR;MAGEA6;SNCA;EZH2
Protein Tetramerization (GO:0051262)	2/83	0.0307502	0.154617	7.65934	26.6687	ITPR1;SNCA
Negative Regulation of Cellular Process (GO:0048523)	5/531	0.0307646	0.154617	3.02437	10.529	ITGAV;ADARB1;ACVR1B;TNF;TENT5C
Actomyosin Structure Organization (GO:0031032)	2/85	0.0321244	0.156383	7.47402	25.6967	FMNL3;WDR1
Actin Filament Depolymerization (GO:0030042)	1/10	0.0325213	0.156383	34.0598	116.684	WDR1
Regulation of Mononuclear Cell Migration (GO:0071675)	1/10	0.0325213	0.156383	34.0598	116.684	TNF
Oxygen Transport (GO:0015671)	1/10	0.0325213	0.156383	34.0598	116.684	HBD
Response to Corticosteroid (GO:0031960)	1/10	0.0325213	0.156383	34.0598	116.684	TNF
Protein K27-linked Ubiquitination (GO:0044314)	1/10	0.0325213	0.156383	34.0598	116.684	UBE2T
- Reg of Adenylate Cyclase-Activating GPCR Sgnlng Pway (GO:0106072)	1/10	0.0325213	0.156383	34.0598	116.684	PDE4D
Negative Regulation of Transcription by RNA Polymerase II (GO:0000122)	6/732	0.0334445	0.157826	2.64573	8.98984	ID3;BCOR;TNF;MAGEA6;SNCA;EZH2
T Cell Receptor Signaling Pathway (GO:0050852)	2/88	0.0342303	0.157826	7.21221	24.3386	RIPK2;PDE4D
Regulation of Dopamine Secretion (GO:0014059)	1/11	0.0357155	0.157826	30.6523	102.139	SNCA
Negative Regulation of Exocytosis (GO:0045920)	1/11	0.0357155	0.157826	30.6523	102.139	SNCA
Negative Regulation of Heart Contraction (GO:0045822)	1/11	0.0357155	0.157826	30.6523	102.139	PDE4D
Regulation of Lipid Transport (GO:0032368)	1/11	0.0357155	0.157826	30.6523	102.139	ITGAV
Negative Regulation of Platelet-Derived Growth Factor Receptor Signaling Pathway (GO:0010642)	1/11	0.0357155	0.157826	30.6523	102.139	SNCA
Carbon Dioxide Transport (GO:0015670)	1/11	0.0357155	0.157826	30.6523	102.139	HBD
Catecholamine Biosynthetic Process (GO:0042423)	1/11	0.0357155	0.157826	30.6523	102.139	SNCA
Positive Regulation of Oxidoreductase Activity (GO:0051353)	1/11	0.0357155	0.157826	30.6523	102.139	FTMT
Protein K29-linked Ubiquitination (GO:0035519)	1/11	0.0357155	0.157826	30.6523	102.139	UBE2T
Maintenance of Protein Localization in Endoplasmic Reticulum (GO:0035437)	1/11	0.0357155	0.157826	30.6523	102.139	HSPA5
Regulation of Cell Communication by Electrical Coupling Involved in Cardiac Conduction (GO:1901844)	1/11	0.0357155	0.157826	30.6523	102.139	PDE4D
- Reg of Intrinsic Apoptotic Sgnlng Pway in Resp to DNA Damage by P53 Cls Mediator (GO:1902166)	1/12	0.0388994	0.157826	27.8643	90.4693	MUC1
Negative Regulation of Macrophage Derived Foam Cell Differentiation (GO:0010745)	1/12	0.0388994	0.157826	27.8643	90.4693	ITGAV
Negative Regulation of Microtubule Polymerization (GO:0031115)	1/12	0.0388994	0.157826	27.8643	90.4693	SNCA
Regulation of Interleukin-5 Production (GO:0032674)	1/12	0.0388994	0.157826	27.8643	90.4693	PDE4D
Negative Regulation of Transcription by Competitive Promoter Binding (GO:0010944)	1/12	0.0388994	0.157826	27.8643	90.4693	MUC1
Astrocyte Activation (GO:0048143)	1/12	0.0388994	0.157826	27.8643	90.4693	TNF
Regulation of Protein K63-linked Ubiquitination (GO:1900044)	1/12	0.0388994	0.157826	27.8643	90.4693	RIPK2
Calcium Import Into the Mitochondrion (GO:0036444)	1/12	0.0388994	0.157826	27.8643	90.4693	ITPR1
Positive Regulation of Neuroinflammatory Response (GO:0150078)	1/12	0.0388994	0.157826	27.8643	90.4693	TNF
Wound Healing, Spreading of Epidermal Cells (GO:0035313)	1/12	0.0388994	0.157826	27.8643	90.4693	ITGAV
Positive Regulation of Protein Localization to Cell Surface (GO:2000010)	1/12	0.0388994	0.157826	27.8643	90.4693	TNF
Post-Translational Protein Targeting to Endoplasmic Reticulum Membrane (GO:0006620)	1/12	0.0388994	0.157826	27.8643	90.4693	HSPA5
Mitochondrial Genome Maintenance (GO:0000002)	1/12	0.0388994	0.157826	27.8643	90.4693	SCO2
Regulation of PERK-mediated Unfolded Protein Response (GO:1903897)	1/12	0.0388994	0.157826	27.8643	90.4693	HSPA5
Regulation of SNARE Complex Assembly (GO:0035542)	1/12	0.0388994	0.157826	27.8643	90.4693	SNCA
Regulation of Actin Filament Depolymerization (GO:0030834)	1/12	0.0388994	0.157826	27.8643	90.4693	WDR1
Regulation of Adenylate Cyclase-Activating G Protein-Coupled Receptor Signaling Pathway (GO:0106070)	1/12	0.0388994	0.157826	27.8643	90.4693	PDE4D
Regulation of Cell Population Proliferation (GO:0042127)	6/769	0.0409863	0.159877	2.51258	8.02649	FTMT;FGF18;CHRNA10;ITGAV;ADARB1;EZH2
Positive Regulation of Hydrolase Activity (GO:0051345)	2/98	0.0416227	0.159877	6.45768	20.5297	TBC1D7;EZH2
MyD88-dependent Toll-Like Receptor Signaling Pathway (GO:0002755)	1/13	0.0420729	0.159877	25.541	80.9229	IRAK1
Reg of Intrinsic Apoptotic Sgnlng Pway in Resp to DNA Damage by P53 Cls Mediator (GO:1902165)	1/13	0.0420729	0.159877	25.541	80.9229	MUC1
Atrioventricular Valve Development (GO:0003171)	1/13	0.0420729	0.159877	25.541	80.9229	HEYL
Regulation of Retinoic Acid Receptor Signaling Pathway (GO:0048385)	1/13	0.0420729	0.159877	25.541	80.9229	EZH2
Response to Muramyl Dipeptide (GO:0032495)	1/13	0.0420729	0.159877	25.541	80.9229	RIPK2
Positive Regulation of Heterotypic Cell-Cell Adhesion (GO:0034116)	1/13	0.0420729	0.159877	25.541	80.9229	TNF
Positive Regulation of Protein Polyubiquitination (GO:1902916)	1/13	0.0420729	0.159877	25.541	80.9229	RIPK2
Mitotic G1 DNA Damage Checkpoint Signaling (GO:0031571)	1/13	0.0420729	0.159877	25.541	80.9229	MUC1
Reg of Calcium Ion Transmembrane Transport via High Voltage-Gated Calcium Channel (GO:1902514)	1/13	0.0420729	0.159877	25.541	80.9229	PDE4D
Negative Regulation of Bone Mineralization (GO:0030502)	1/13	0.0420729	0.159877	25.541	80.9229	BCOR
Regulation of Cell Communication by Electrical Coupling (GO:0010649)	1/13	0.0420729	0.159877	25.541	80.9229	PDE4D
Positive Regulation of Transcription by RNA Polymerase II (GO:0045944)	7/983	0.042715	0.161529	2.30456	7.26676	BCL2L12;HEYL;MUC1;HSPA5;RIPK2;TNF;NFKB2
Positive Regulation of Protein Localization (GO:1903829)	2/102	0.0447332	0.161647	6.19813	19.2578	TNF;SNCA
Regulation of Leukocyte Migration (GO:0002685)	1/14	0.0452361	0.161647	23.5751	72.9853	TNFRSF18
Regulation of Platelet-Derived Growth Factor Receptor Signaling Pathway (GO:0010640)	1/14	0.0452361	0.161647	23.5751	72.9853	SNCA
Positive Regulation of Acute Inflammatory Response (GO:0002675)	1/14	0.0452361	0.161647	23.5751	72.9853	TNF
Positive Regulation of Endothelial Cell Chemotaxis (GO:2001028)	1/14	0.0452361	0.161647	23.5751	72.9853	FGF18
Positive Regulation of Heart Rate (GO:0010460)	1/14	0.0452361	0.161647	23.5751	72.9853	PDE4D
Extrinsic Apoptotic Signaling Pathway in Absence of Ligand (GO:0097192)	1/14	0.0452361	0.161647	23.5751	72.9853	ITGAV
Positive Regulation of Protein-Containing Complex Disassembly (GO:0043243)	1/14	0.0452361	0.161647	23.5751	72.9853	TNF
Mitochondrion Distribution (GO:0048311)	1/14	0.0452361	0.161647	23.5751	72.9853	TRAK1
Mitotic G1/S Transition Checkpoint Signaling (GO:0044819)	1/14	0.0452361	0.161647	23.5751	72.9853	MUC1
Negative Regulation of Androgen Receptor Signaling Pathway (GO:0060766)	1/14	0.0452361	0.161647	23.5751	72.9853	HEYL
Regulation of Chemokine (C-X-C Motif) Ligand 2 Production (GO:2000341)	1/14	0.0452361	0.161647	23.5751	72.9853	TNF
Positive Regulation of NF-kappaB Transcription Factor Activity (GO:0051092)	2/105	0.0471211	0.163024	6.01669	18.3812	IRAK1;TNF
Positive Regulation of Protein-Containing Complex Assembly (GO:0031334)	2/105	0.0471211	0.163024	6.01669	18.3812	TNF;SNCA
Astrocyte Development (GO:0014002)	1/15	0.0483891	0.163024	21.8901	66.2938	TNF
Nucleotide-Binding Domain, Leucine Rich Repeat Containing Receptor Signaling Pathway (GO:0035872)	1/15	0.0483891	0.163024	21.8901	66.2938	RIPK2
Cardiac Myofibril Assembly (GO:0055003)	1/15	0.0483891	0.163024	21.8901	66.2938	FMNL3
Positive Regulation of Membrane Protein Ectodomain Proteolysis (GO:0051044)	1/15	0.0483891	0.163024	21.8901	66.2938	TNF
Gas Transport (GO:0015669)	1/15	0.0483891	0.163024	21.8901	66.2938	HBD
Protein K6-linked Ubiquitination (GO:0085020)	1/15	0.0483891	0.163024	21.8901	66.2938	UBE2T
Regulation of IRE1-mediated Unfolded Protein Response (GO:1903894)	1/15	0.0483891	0.163024	21.8901	66.2938	HSPA5
Regulation of Amyloid-Beta Clearance (GO:1900221)	1/15	0.0483891	0.163024	21.8901	66.2938	TNF
Negative Regulation of NLRP3 Inflammasome Complex Assembly (GO:1900226)	1/15	0.0483891	0.163024	21.8901	66.2938	HSPA8
Regulation of Catecholamine Secretion (GO:0050433)	1/15	0.0483891	0.163024	21.8901	66.2938	SNCA
Positive Regulation of Cell Motility (GO:2000147)	3/249	0.049205	0.163024	3.81107	11.478	HSPA8;HSPA5;EZH2
Negative Regulation of Cytokine Production Involved in Immune Response (GO:0002719)	1/16	0.0515317	0.163024	20.4297	60.5856	TNF
COPII-coated Vesicle Cargo Loading (GO:0090110)	1/16	0.0515317	0.163024	20.4297	60.5856	SEC23B
Regulation of Establishment of Endothelial Barrier (GO:1903140)	1/16	0.0515317	0.163024	20.4297	60.5856	TNF
Negative Regulation of Intrinsic Apoptotic Signaling Pathway by P53 Class Mediator (GO:1902254)	1/16	0.0515317	0.163024	20.4297	60.5856	MUC1
Negative Regulation of Signaling Receptor Activity (GO:2000272)	1/16	0.0515317	0.163024	20.4297	60.5856	TNF
Regulation of Presynapse Assembly (GO:1905606)	1/16	0.0515317	0.163024	20.4297	60.5856	SNCA
Regulation of Presynapse Organization (GO:0099174)	1/16	0.0515317	0.163024	20.4297	60.5856	SNCA
Base Conversion or Substitution Editing (GO:0016553)	1/16	0.0515317	0.163024	20.4297	60.5856	ADARB1
Regulation of Response to Cytokine Stimulus (GO:0060759)	1/16	0.0515317	0.163024	20.4297	60.5856	IRAK1
One-Carbon Compound Transport (GO:0019755)	1/16	0.0515317	0.163024	20.4297	60.5856	HBD
Regulation of Ryanodine-Sensitive Calcium-Release Channel Activity (GO:0060314)	1/16	0.0515317	0.163024	20.4297	60.5856	JPH1
Lipopolysaccharide-Mediated Signaling Pathway (GO:0031663)	1/16	0.0515317	0.163024	20.4297	60.5856	IRAK1
Mesenchyme Morphogenesis (GO:0072132)	1/16	0.0515317	0.163024	20.4297	60.5856	HEYL
Negative Regulation of Developmental Process (GO:0051093)	2/111	0.0520335	0.163024	5.68377	16.8005	ACVR1B;TENT5C
Positive Regulation of GTPase Activity (GO:0043547)	2/111	0.0520335	0.163024	5.68377	16.8005	TBC1D7;EZH2
Positive Regulation of Cellular Component Organization (GO:0051130)	2/111	0.0520335	0.163024	5.68377	16.8005	TNF;SNCA
Cellular Response to Metal Ion (GO:0071248)	2/112	0.0528695	0.163024	5.63182	16.5571	SLC25A39;SNCA
Regulation of Protein Ubiquitination (GO:0031396)	2/113	0.0537102	0.163024	5.5808	16.3191	RIPK2;TBC1D7
Antigen Receptor-Mediated Signaling Pathway (GO:0050851)	2/114	0.0545558	0.163024	5.53069	16.0862	RIPK2;PDE4D
Chemical Synaptic Transmission (GO:0007268)	3/260	0.0546548	0.163024	3.64591	10.5976	CHRNA10;CBLN2;SNCA
Actin Filament Capping (GO:0051693)	1/17	0.0546642	0.163024	19.1519	55.666	AVIL
Barbed-End Actin Filament Capping (GO:0051016)	1/17	0.0546642	0.163024	19.1519	55.666	AVIL
Regulation of Receptor Recycling (GO:0001919)	1/17	0.0546642	0.163024	19.1519	55.666	SNCA
Cell Junction Maintenance (GO:0034331)	1/17	0.0546642	0.163024	19.1519	55.666	CBLN2
Cellular Response to Copper Ion (GO:0071280)	1/17	0.0546642	0.163024	19.1519	55.666	SNCA
Cortical Actin Cytoskeleton Organization (GO:0030866)	1/17	0.0546642	0.163024	19.1519	55.666	FMNL3
Filopodium Assembly (GO:0046847)	1/17	0.0546642	0.163024	19.1519	55.666	FMNL3
Leukocyte Tethering or Rolling (GO:0050901)	1/17	0.0546642	0.163024	19.1519	55.666	TNF
Positive Regulation of Inflammatory Response (GO:0050729)	2/115	0.0554061	0.163024	5.48147	15.8583	TNF;SNCA
Protein Complex Oligomerization (GO:0051259)	2/116	0.0562611	0.163024	5.43311	15.6352	RIPK2;SNCA
Negative Regulation of Endoplasmic Reticulum Unfolded Protein Response (GO:1900102)	1/18	0.0577864	0.163024	18.0244	51.3877	HSPA5
Negative Regulation of Nervous System Development (GO:0051961)	1/18	0.0577864	0.163024	18.0244	51.3877	TNF
Regulation of Protein-Containing Complex Disassembly (GO:0043244)	1/18	0.0577864	0.163024	18.0244	51.3877	TNF
Positive Regulation of Amyloid-Beta Formation (GO:1902004)	1/18	0.0577864	0.163024	18.0244	51.3877	TNF
Positive Regulation of Cytokine Production Involved in Inflammatory Response (GO:1900017)	1/18	0.0577864	0.163024	18.0244	51.3877	TNF
Embryo Development Ending in Birth or Egg Hatching (GO:0009792)	1/18	0.0577864	0.163024	18.0244	51.3877	C1QTNF5
Synaptic Transmission, Cholinergic (GO:0007271)	1/18	0.0577864	0.163024	18.0244	51.3877	CHRNA10
Protein Import Into Mitochondrial Matrix (GO:0030150)	1/18	0.0577864	0.163024	18.0244	51.3877	TOMM40L
Mitochondrial Calcium Ion Transmembrane Transport (GO:0006851)	1/18	0.0577864	0.163024	18.0244	51.3877	ITPR1
Regulation of Activin Receptor Signaling Pathway (GO:0032925)	1/18	0.0577864	0.163024	18.0244	51.3877	ACVR1B
Regulation of Bicellular Tight Junction Assembly (GO:2000810)	1/18	0.0577864	0.163024	18.0244	51.3877	TNF
Regulation of Calcium Ion Transmembrane Transporter Activity (GO:1901019)	1/18	0.0577864	0.163024	18.0244	51.3877	JPH1
MAPK Cascade (GO:0000165)	2/119	0.0588539	0.163024	5.293	14.9935	RIPK2;ITGAV
Negative Regulation of Catabolic Process (GO:0009895)	2/120	0.0597273	0.163024	5.24788	14.7884	TNF;MAGEA6
Negative Regulation of Inflammasome-Mediated Signaling Pathway (GO:0141086)	1/19	0.0608985	0.163024	17.0222	47.6375	HSPA8
Negative Regulation of Lipid Catabolic Process (GO:0050995)	1/19	0.0608985	0.163024	17.0222	47.6375	TNF
Adrenergic Receptor Signaling Pathway (GO:0071875)	1/19	0.0608985	0.163024	17.0222	47.6375	PDE4D
Cardiac Epithelial to Mesenchymal Transition (GO:0060317)	1/19	0.0608985	0.163024	17.0222	47.6375	HEYL
Positive Regulation of Alcohol Biosynthetic Process (GO:1902932)	1/19	0.0608985	0.163024	17.0222	47.6375	SNCA
Positive Regulation of calcineurin-NFAT Signaling Cascade (GO:0070886)	1/19	0.0608985	0.163024	17.0222	47.6375	TNF
Positive Regulation of Calcineurin-Mediated Signaling (GO:0106058)	1/19	0.0608985	0.163024	17.0222	47.6375	TNF
Positive Regulation of Cell Cycle Phase Transition (GO:1901989)	1/19	0.0608985	0.163024	17.0222	47.6375	EZH2
Dopamine Metabolic Process (GO:0042417)	1/19	0.0608985	0.163024	17.0222	47.6375	SNCA
Embryonic Digestive Tract Development (GO:0048566)	1/19	0.0608985	0.163024	17.0222	47.6375	TNF
Endolysosomal Toll-Like Receptor Signaling Pathway (GO:0140894)	1/19	0.0608985	0.163024	17.0222	47.6375	IRAK1
Positive Regulation of Macrophage Derived Foam Cell Differentiation (GO:0010744)	1/19	0.0608985	0.163024	17.0222	47.6375	TNF
Leukocyte Adhesion to Vascular Endothelial Cell (GO:0061756)	1/19	0.0608985	0.163024	17.0222	47.6375	TNF
Protein Localization to Endoplasmic Reticulum (GO:0070972)	1/19	0.0608985	0.163024	17.0222	47.6375	HSPA5
Maintenance of Protein Localization in Organelle (GO:0072595)	1/19	0.0608985	0.163024	17.0222	47.6375	HSPA5
Pulmonary Valve Morphogenesis (GO:0003184)	1/19	0.0608985	0.163024	17.0222	47.6375	HEYL
Negative Regulation of DNA-binding Transcription Factor Activity (GO:0043433)	2/122	0.0614876	0.163464	5.1599	14.3905	HEYL;ID3
Response to Cytokine (GO:0034097)	2/123	0.0623743	0.163464	5.11699	14.1976	IRAK1;SNCA
Plasma Membrane Bounded Cell Projection Assembly (GO:0120031)	3/277	0.063622	0.163464	3.41675	9.41246	FMNL3;TCTN3;AVIL
Positive Regulation of Intracellular Signal Transduction (GO:1902533)	5/652	0.0638604	0.163464	2.44343	6.72202	IRAK1;RIPK2;FGF18;ITGAV;TNF
Atrioventricular Valve Morphogenesis (GO:0003181)	1/20	0.0640005	0.163464	16.1255	44.3268	HEYL
Cardiac Ventricle Development (GO:0003231)	1/20	0.0640005	0.163464	16.1255	44.3268	HEYL
Phosphatidylserine Metabolic Process (GO:0006658)	1/20	0.0640005	0.163464	16.1255	44.3268	PLA1A
Endocardial Cushion Morphogenesis (GO:0003203)	1/20	0.0640005	0.163464	16.1255	44.3268	HEYL
Positive Regulation of Monooxygenase Activity (GO:0032770)	1/20	0.0640005	0.163464	16.1255	44.3268	TNF
Positive Regulation of Osteoclast Differentiation (GO:0045672)	1/20	0.0640005	0.163464	16.1255	44.3268	TNF
Glycogen Metabolic Process (GO:0005977)	1/20	0.0640005	0.163464	16.1255	44.3268	GYG1
Hydrogen Peroxide Catabolic Process (GO:0042744)	1/20	0.0640005	0.163464	16.1255	44.3268	HBD
Interleukin-1-Mediated Signaling Pathway (GO:0070498)	1/20	0.0640005	0.163464	16.1255	44.3268	IRAK1
Presynaptic Endocytosis (GO:0140238)	1/20	0.0640005	0.163464	16.1255	44.3268	SNCA
Calcium Ion Transport (GO:0006816)	2/126	0.0650609	0.165629	4.99244	13.6415	ITPR1;ITGAV
RNA Biosynthetic Process (GO:0032774)	2/128	0.0668734	0.167516	4.9127	13.2886	RBM39;ADARB1
Negative Regulation of Cilium Assembly (GO:1902018)	1/21	0.0670924	0.167516	15.3185	41.3857	TBC1D7
Regulation of Neuroinflammatory Response (GO:0150077)	1/21	0.0670924	0.167516	15.3185	41.3857	TNF
Response to Copper Ion (GO:0046688)	1/21	0.0670924	0.167516	15.3185	41.3857	SNCA
Pulmonary Valve Development (GO:0003177)	1/21	0.0670924	0.167516	15.3185	41.3857	HEYL
Negative Regulation of Biomineral Tissue Development (GO:0070168)	1/21	0.0670924	0.167516	15.3185	41.3857	BCOR
Positive Regulation of Defense Response (GO:0031349)	2/130	0.0687028	0.17083	4.83545	12.9492	TNF;SNCA
Endocardial Cushion Development (GO:0003197)	1/22	0.0701742	0.17083	14.5883	38.7578	HEYL
Positive Regulation of Heart Contraction (GO:0045823)	1/22	0.0701742	0.17083	14.5883	38.7578	PDE4D
tRNA Aminoacylation (GO:0043039)	1/22	0.0701742	0.17083	14.5883	38.7578	2002-03-01
Positive Regulation of Interferon-Alpha Production (GO:0032727)	1/22	0.0701742	0.17083	14.5883	38.7578	RIPK2
Intracellular Protein Transmembrane Transport (GO:0065002)	1/22	0.0701742	0.17083	14.5883	38.7578	HSPA5
Regulation of Biosynthetic Process (GO:0009889)	1/22	0.0701742	0.17083	14.5883	38.7578	SNCA
Negative Regulation of Cell Development (GO:0010721)	1/22	0.0701742	0.17083	14.5883	38.7578	TNF
RNA Processing (GO:0006396)	3/291	0.0714879	0.171803	3.24835	8.56988	NOP56;RBM39;ADARB1
Negative Regulation of Apoptotic Process (GO:0043066)	4/475	0.0717632	0.171803	2.66598	7.02322	BCL2L12;HSPA5;TNF;SNCA
Regulation of GTPase Activity (GO:0043087)	2/134	0.0724107	0.171803	4.68797	12.3078	TBC1D7;EZH2
Regulation of Heterotypic Cell-Cell Adhesion (GO:0034114)	1/23	0.073246	0.171803	13.9245	36.3976	TNF
Positive Regulation of Amide Metabolic Process (GO:0034250)	1/23	0.073246	0.171803	13.9245	36.3976	TNF
Positive Regulation of Amyloid Precursor Protein Catabolic Process (GO:1902993)	1/23	0.073246	0.171803	13.9245	36.3976	TNF
Positive Regulation of Lamellipodium Assembly (GO:0010592)	1/23	0.073246	0.171803	13.9245	36.3976	AVIL
Positive Regulation of Phosphate Metabolic Process (GO:0045937)	1/23	0.073246	0.171803	13.9245	36.3976	SNCA
Positive Regulation of Tyrosine Phosphorylation of STAT Protein (GO:0042531)	1/23	0.073246	0.171803	13.9245	36.3976	TNFRSF18
Negative Regulation of Cell Junction Assembly (GO:1901889)	1/23	0.073246	0.171803	13.9245	36.3976	TNF
Nervous System Development (GO:0007399)	4/480	0.0739542	0.171803	2.6373	6.86834	ADAM23;FGF18;ACVR1B;TRAK1
Positive Regulation of Cell Differentiation (GO:0045597)	3/297	0.0749878	0.171803	3.18108	8.24037	HEYL;TNF;EZH2
Negative Regulation of Extrinsic Apoptotic Signaling Pathway in Absence of Ligand (GO:2001240)	1/24	0.0763078	0.171803	13.3184	34.268	TNF
Negative Regulation of Receptor-Mediated Endocytosis (GO:0048261)	1/24	0.0763078	0.171803	13.3184	34.268	ITGAV
Negative Regulation of Signal Transduction in Absence of Ligand (GO:1901099)	1/24	0.0763078	0.171803	13.3184	34.268	TNF
Apoptotic Cell Clearance (GO:0043277)	1/24	0.0763078	0.171803	13.3184	34.268	ITGAV
cAMP-mediated Signaling (GO:0019933)	1/24	0.0763078	0.171803	13.3184	34.268	PDE4D
Regulation of Release of Sequestered Calcium Ion Into Cytosol by Sarcoplasmic Reticulum (GO:0010880)	1/24	0.0763078	0.171803	13.3184	34.268	PDE4D
Cellular Response to Steroid Hormone Stimulus (GO:0071383)	1/24	0.0763078	0.171803	13.3184	34.268	HSPA8
Positive Regulation of JUN Kinase Activity (GO:0043507)	1/24	0.0763078	0.171803	13.3184	34.268	TNF
Secondary Alcohol Biosynthetic Process (GO:1902653)	1/24	0.0763078	0.171803	13.3184	34.268	MSMO1
Positive Regulation of Cell Communication (GO:0010647)	1/24	0.0763078	0.171803	13.3184	34.268	TNF
Endothelial Cell Development (GO:0001885)	1/24	0.0763078	0.171803	13.3184	34.268	PDE4D
Vesicle Transport Along Microtubule (GO:0047496)	1/24	0.0763078	0.171803	13.3184	34.268	TRAK1
Protein Targeting to Lysosome (GO:0006622)	1/24	0.0763078	0.171803	13.3184	34.268	HSPA8
Mitochondrial Cytochrome C Oxidase Assembly (GO:0033617)	1/24	0.0763078	0.171803	13.3184	34.268	SCO2
Regulation of Cytoskeleton Organization (GO:0051493)	2/139	0.077135	0.172685	4.51574	11.5702	TRIM36;SNCA
Protein Autophosphorylation (GO:0046777)	2/140	0.0780915	0.172685	4.48279	11.4306	IRAK1;ACVR1B
Negative Regulation of Intrinsic Apoptotic Signaling Pathway in Response to DNA Damage (GO:1902230)	1/25	0.0793596	0.172685	12.7628	32.338	MUC1
Negative Regulation of miRNA Transcription (GO:1902894)	1/25	0.0793596	0.172685	12.7628	32.338	TNF
Regulation of Membrane Protein Ectodomain Proteolysis (GO:0051043)	1/25	0.0793596	0.172685	12.7628	32.338	TNF
Activin Receptor Signaling Pathway (GO:0032924)	1/25	0.0793596	0.172685	12.7628	32.338	ACVR1B
Cardiac Muscle Cell Development (GO:0055013)	1/25	0.0793596	0.172685	12.7628	32.338	FMNL3
Response to Glucocorticoid (GO:0051384)	1/25	0.0793596	0.172685	12.7628	32.338	TNF
Cholesterol Biosynthetic Process (GO:0006695)	1/25	0.0793596	0.172685	12.7628	32.338	MSMO1
Steroid Biosynthetic Process (GO:0006694)	1/25	0.0793596	0.172685	12.7628	32.338	MSMO1
Vesicle Cytoskeletal Trafficking (GO:0099518)	1/25	0.0793596	0.172685	12.7628	32.338	TRAK1
Negative Chemotaxis (GO:0050919)	1/25	0.0793596	0.172685	12.7628	32.338	ITGAV
Protein Homooligomerization (GO:0051260)	2/143	0.0809833	0.175385	4.38675	11.0261	RIPK2;ITPR1
Synapse Organization (GO:0050808)	2/144	0.0819547	0.175385	4.35563	10.896	CBLN2;SNCA
Regulation of Lipid Catabolic Process (GO:0050994)	1/26	0.0824016	0.175385	12.2517	30.5821	TNF
Amyloid Fibril Formation (GO:1990000)	1/26	0.0824016	0.175385	12.2517	30.5821	SNCA
Positive Regulation of Interleukin-2 Production (GO:0032743)	1/26	0.0824016	0.175385	12.2517	30.5821	PDE4D
Protein Depolymerization (GO:0051261)	1/26	0.0824016	0.175385	12.2517	30.5821	WDR1
Regulation of Actin Polymerization or Depolymerization (GO:0008064)	1/26	0.0824016	0.175385	12.2517	30.5821	WDR1
Regulation of Cardiac Muscle Cell Contraction (GO:0086004)	1/26	0.0824016	0.175385	12.2517	30.5821	PDE4D
Regulation of Cytokine Production Involved in Immune Response (GO:0002718)	1/27	0.0854336	0.176532	11.7799	28.9787	TNF
Negative Regulation of miRNA Metabolic Process (GO:2000629)	1/27	0.0854336	0.176532	11.7799	28.9787	TNF
Regulation of Interferon-Alpha Production (GO:0032647)	1/27	0.0854336	0.176532	11.7799	28.9787	RIPK2
Negative Regulation of Neurogenesis (GO:0050768)	1/27	0.0854336	0.176532	11.7799	28.9787	TNF
Regulation of Myelination (GO:0031641)	1/27	0.0854336	0.176532	11.7799	28.9787	SCO2
Regulation of Protein Localization to Cell Periphery (GO:1904375)	1/27	0.0854336	0.176532	11.7799	28.9787	SNCA
Regulation of Reactive Oxygen Species Biosynthetic Process (GO:1903426)	1/27	0.0854336	0.176532	11.7799	28.9787	SNCA
Respiratory Chain Complex IV Assembly (GO:0008535)	1/27	0.0854336	0.176532	11.7799	28.9787	SCO2
Positive Regulation of Erythrocyte Differentiation (GO:0045648)	1/27	0.0854336	0.176532	11.7799	28.9787	ACVR1B
Wound Healing, Spreading of Cells (GO:0044319)	1/27	0.0854336	0.176532	11.7799	28.9787	ITGAV
Regulation of Cation Channel Activity (GO:2001257)	1/27	0.0854336	0.176532	11.7799	28.9787	JPH1
Regulation of Extrinsic Apoptotic Signaling Pathway in Absence of Ligand (GO:2001239)	1/28	0.0884557	0.177595	11.343	27.5097	TNF
Regulation of Lipid Biosynthetic Process (GO:0046890)	1/28	0.0884557	0.177595	11.343	27.5097	AVIL
Negative Regulation of Protein Polymerization (GO:0032272)	1/28	0.0884557	0.177595	11.343	27.5097	SNCA
Regulation of Tyrosine Phosphorylation of STAT Protein (GO:0042509)	1/28	0.0884557	0.177595	11.343	27.5097	TNFRSF18
Sterol Biosynthetic Process (GO:0016126)	1/28	0.0884557	0.177595	11.343	27.5097	MSMO1
Establishment of Endothelial Barrier (GO:0061028)	1/28	0.0884557	0.177595	11.343	27.5097	PDE4D
Toll-Like Receptor 4 Signaling Pathway (GO:0034142)	1/28	0.0884557	0.177595	11.343	27.5097	IRAK1
Ventricular Septum Morphogenesis (GO:0060412)	1/28	0.0884557	0.177595	11.343	27.5097	HEYL
Hydrogen Peroxide Metabolic Process (GO:0042743)	1/28	0.0884557	0.177595	11.343	27.5097	HBD
Positive Regulation of Viral Genome Replication (GO:0045070)	1/28	0.0884557	0.177595	11.343	27.5097	ADARB1
Regulation of Calcium Ion Transmembrane Transport (GO:1903169)	1/28	0.0884557	0.177595	11.343	27.5097	PDE4D
Negative Regulation of Wound Healing (GO:0061045)	1/29	0.091468	0.181769	10.9374	26.1596	TNF
Regulation of Supramolecular Fiber Organization (GO:1902903)	1/29	0.091468	0.181769	10.9374	26.1596	HSPA8
Synaptic Vesicle Endocytosis (GO:0048488)	1/29	0.091468	0.181769	10.9374	26.1596	SNCA
Regulation of Androgen Receptor Signaling Pathway (GO:0060765)	1/29	0.091468	0.181769	10.9374	26.1596	HEYL
Negative Regulation of Ossification (GO:0030279)	1/30	0.0944705	0.185372	10.5597	24.9152	BCOR
Positive Regulation of Catalytic Activity (GO:0043085)	1/30	0.0944705	0.185372	10.5597	24.9152	FTMT
Positive Regulation of Nitric Oxide Biosynthetic Process (GO:0045429)	1/30	0.0944705	0.185372	10.5597	24.9152	TNF
Heterotypic Cell-Cell Adhesion (GO:0034113)	1/30	0.0944705	0.185372	10.5597	24.9152	ITGAV
Intrinsic Apoptotic Signaling Pathway in Response to Endoplasmic Reticulum Stress (GO:0070059)	1/30	0.0944705	0.185372	10.5597	24.9152	ITPR1
Actin Filament Organization (GO:0007015)	2/158	0.0959206	0.187744	3.96194	9.28772	ACTA1;AVIL
Regulation of Cellular Component Organization (GO:0051128)	2/159	0.0969431	0.18793	3.9365	9.18635	HSPA8;TNF
Negative Regulation of Intracellular Steroid Hormone Receptor Signaling Pathway (GO:0033144)	1/31	0.0974633	0.18793	10.2072	23.7652	HEYL
Activation of GTPase Activity (GO:0090630)	1/31	0.0974633	0.18793	10.2072	23.7652	TBC1D7
Regulation of Protein Localization to Cell Surface (GO:2000008)	1/31	0.0974633	0.18793	10.2072	23.7652	TNF
Positive Regulation of Lamellipodium Organization (GO:1902745)	1/31	0.0974633	0.18793	10.2072	23.7652	AVIL
Positive Regulation of Nitric Oxide Metabolic Process (GO:1904407)	1/31	0.0974633	0.18793	10.2072	23.7652	TNF
Response to Lipopolysaccharide (GO:0032496)	2/161	0.0989975	0.189004	3.8866	8.98838	IRAK1;SNCA
Negative Regulation of Fat Cell Differentiation (GO:0045599)	1/32	0.100446	0.189004	9.87742	22.6996	TNF
DNA Damage Response, Signal Transduction by P53 Class Mediator (GO:0030330)	1/32	0.100446	0.189004	9.87742	22.6996	MUC1
Negative Regulation of Interleukin-6 Production (GO:0032715)	1/32	0.100446	0.189004	9.87742	22.6996	TNF
Regulation of Lamellipodium Assembly (GO:0010591)	1/32	0.100446	0.189004	9.87742	22.6996	AVIL
Response to Steroid Hormone (GO:0048545)	1/32	0.100446	0.189004	9.87742	22.6996	HSPA8
Endodermal Cell Differentiation (GO:0035987)	1/32	0.100446	0.189004	9.87742	22.6996	ITGAV
Extrinsic Apoptotic Signaling Pathway via Death Domain Receptors (GO:0008625)	1/32	0.100446	0.189004	9.87742	22.6996	TNF
Protein Transmembrane Import Into Intracellular Organelle (GO:0044743)	1/32	0.100446	0.189004	9.87742	22.6996	TOMM40L
Purine Ribonucleoside Triphosphate Metabolic Process (GO:0009205)	1/32	0.100446	0.189004	9.87742	22.6996	HSPA8
Positive Regulation of Response to External Stimulus (GO:0032103)	2/163	0.101064	0.189708	3.83793	8.79653	TNF;SNCA
Negative Regulation of Lipid Metabolic Process (GO:0045833)	1/33	0.10342	0.190909	9.56827	21.71	TNF
Cortical Cytoskeleton Organization (GO:0030865)	1/33	0.10342	0.190909	9.56827	21.71	FMNL3
Signal Release From Synapse (GO:0099643)	1/33	0.10342	0.190909	9.56827	21.71	SNCA
Positive Regulation of Interleukin-12 Production (GO:0032735)	1/33	0.10342	0.190909	9.56827	21.71	RIPK2
Regulation of Amyloid-Beta Formation (GO:1902003)	1/33	0.10342	0.190909	9.56827	21.71	TNF
Regulation of calcineurin-NFAT Signaling Cascade (GO:0070884)	1/33	0.10342	0.190909	9.56827	21.71	TNF
Regulation of Cell Adhesion Mediated by Integrin (GO:0033628)	1/33	0.10342	0.190909	9.56827	21.71	MUC1
JNK Cascade (GO:0007254)	1/34	0.106383	0.192279	9.27786	20.789	RIPK2
Negative Regulation of Microtubule Polymerization or Depolymerization (GO:0031111)	1/34	0.106383	0.192279	9.27786	20.789	SNCA
Positive Regulation of Carbohydrate Metabolic Process (GO:0045913)	1/34	0.106383	0.192279	9.27786	20.789	SNCA
Positive Regulation of Establishment of Protein Localization (GO:1904951)	1/34	0.106383	0.192279	9.27786	20.789	TNF
Synaptic Vesicle Recycling (GO:0036465)	1/34	0.106383	0.192279	9.27786	20.789	SNCA
Tumor Necrosis Factor-Mediated Signaling Pathway (GO:0033209)	1/34	0.106383	0.192279	9.27786	20.789	TNF
Regulation of JUN Kinase Activity (GO:0043506)	1/34	0.106383	0.192279	9.27786	20.789	TNF
Regulation of Cardiac Muscle Contraction (GO:0055117)	1/34	0.106383	0.192279	9.27786	20.789	PDE4D
Negative Regulation of Blood Vessel Endothelial Cell Migration (GO:0043537)	1/34	0.106383	0.192279	9.27786	20.789	TNF
Cellular Response to Nitrogen Compound (GO:1901699)	2/169	0.107336	0.193337	3.69891	8.2552	RIPK2;PDE4D
Neurotransmitter Secretion (GO:0007269)	1/35	0.109337	0.193337	9.00452	19.9299	SNCA
Cellular Response to cAMP (GO:0071320)	1/35	0.109337	0.193337	9.00452	19.9299	PDE4D
Smoothened Signaling Pathway (GO:0007224)	1/35	0.109337	0.193337	9.00452	19.9299	TCTN3
Substrate Adhesion-Dependent Cell Spreading (GO:0034446)	1/35	0.109337	0.193337	9.00452	19.9299	ITGAV
Toll-Like Receptor Signaling Pathway (GO:0002224)	1/35	0.109337	0.193337	9.00452	19.9299	IRAK1
Positive Regulation of Macromolecule Metabolic Process (GO:0010604)	1/35	0.109337	0.193337	9.00452	19.9299	SNCA
Positive Regulation of Mononuclear Cell Migration (GO:0071677)	1/35	0.109337	0.193337	9.00452	19.9299	TNF
RNA Splicing, via Transesterification Reactions With Bulged Adenosine as Nucleophile (GO:0000377)	2/171	0.10945	0.193337	3.65477	8.08541	HSPA8;PPIL1
Positive Regulation of Protein Phosphorylation (GO:0001934)	2/171	0.10945	0.193337	3.65477	8.08541	RIPK2;TNF
Regulation of Cytosolic Calcium Ion Concentration (GO:0051480)	1/36	0.112281	0.195239	8.74681	19.1271	ITPR1
Negative Regulation of Plasma Membrane Bounded Cell Projection Assembly (GO:0120033)	1/36	0.112281	0.195239	8.74681	19.1271	TBC1D7
Peptidyl-Threonine Phosphorylation (GO:0018107)	1/36	0.112281	0.195239	8.74681	19.1271	ACVR1B
Endoderm Formation (GO:0001706)	1/36	0.112281	0.195239	8.74681	19.1271	ITGAV
tRNA Aminoacylation for Protein Translation (GO:0006418)	1/36	0.112281	0.195239	8.74681	19.1271	2002-03-01
Establishment or Maintenance of Epithelial Cell Apical/Basal Polarity (GO:0045197)	1/36	0.112281	0.195239	8.74681	19.1271	WDR1
Positive Regulation of Release of Sequestered Calcium Ion Into Cytosol (GO:0051281)	1/36	0.112281	0.195239	8.74681	19.1271	SNCA
Positive Regulation of DNA-binding Transcription Factor Activity (GO:0051091)	2/174	0.112641	0.195429	3.59048	7.83998	IRAK1;TNF
Negative Regulation of Endothelial Cell Migration (GO:0010596)	1/37	0.115216	0.19726	8.50342	18.3754	TNF
Regulation of mRNA Processing (GO:0050684)	1/37	0.115216	0.19726	8.50342	18.3754	RBM39
Regulatory ncRNA-mediated Gene Silencing (GO:0031047)	1/37	0.115216	0.19726	8.50342	18.3754	EZH2
Positive Regulation of Interferon-Beta Production (GO:0032728)	1/37	0.115216	0.19726	8.50342	18.3754	RIPK2
Positive Regulation of Myeloid Cell Differentiation (GO:0045639)	1/37	0.115216	0.19726	8.50342	18.3754	ACVR1B
Regulation of Cellular Component Biogenesis (GO:0044087)	1/37	0.115216	0.19726	8.50342	18.3754	HSPA8
Positive Regulation of MAPK Cascade (GO:0043410)	3/362	0.117445	0.198345	2.5965	5.56114	FGF18;TNF;EZH2
COPII-coated Vesicle Budding (GO:0090114)	1/38	0.118141	0.198345	8.27318	17.6705	SEC23B
Regulation of Erythrocyte Differentiation (GO:0045646)	1/38	0.118141	0.198345	8.27318	17.6705	ACVR1B
Aortic Valve Morphogenesis (GO:0003180)	1/38	0.118141	0.198345	8.27318	17.6705	HEYL
Regulation of Sprouting Angiogenesis (GO:1903670)	1/38	0.118141	0.198345	8.27318	17.6705	FGF18
Regulation of Synapse Organization (GO:0050807)	1/38	0.118141	0.198345	8.27318	17.6705	TNF
Positive Regulation of Exocytosis (GO:0045921)	1/38	0.118141	0.198345	8.27318	17.6705	SNCA
Ventricular Septum Development (GO:0003281)	1/38	0.118141	0.198345	8.27318	17.6705	HEYL
Protein K11-linked Ubiquitination (GO:0070979)	1/38	0.118141	0.198345	8.27318	17.6705	UBE2T
Positive Regulation of Extrinsic Apoptotic Signaling Pathway (GO:2001238)	1/39	0.121057	0.202368	8.05506	17.0082	TNF
Positive Regulation of Neuron Apoptotic Process (GO:0043525)	1/39	0.121057	0.202368	8.05506	17.0082	TNF
Positive Regulation of Catabolic Process (GO:0009896)	2/183	0.122359	0.203729	3.41039	7.16455	TNF;SNCA
Regulation of Cytokine-Mediated Signaling Pathway (GO:0001959)	1/40	0.123963	0.203729	7.84813	16.3851	IRAK1
Negative Regulation of Sequestering of Calcium Ion (GO:0051283)	1/40	0.123963	0.203729	7.84813	16.3851	ITPR1
Constitutive Heterochromatin Formation (GO:0140719)	1/40	0.123963	0.203729	7.84813	16.3851	EZH2
Fibroblast Growth Factor Receptor Signaling Pathway (GO:0008543)	1/40	0.123963	0.203729	7.84813	16.3851	FGF18
Positive Regulation of Viral Process (GO:0048524)	1/40	0.123963	0.203729	7.84813	16.3851	ADARB1
Protein Monoubiquitination (GO:0006513)	1/40	0.123963	0.203729	7.84813	16.3851	UBE2T
Regulation of Apoptotic Signaling Pathway (GO:2001233)	1/40	0.123963	0.203729	7.84813	16.3851	TNF
Positive Regulation of DNA-templated Transcription (GO:0045893)	7/1274	0.125799	0.204604	1.74801	3.62374	BCL2L12;HEYL;MUC1;HSPA5;RIPK2;TNF;NFKB2
Negative Regulation of Kinase Activity (GO:0033673)	1/41	0.12686	0.204604	7.65154	15.7979	SNCA
RNA Stabilization (GO:0043489)	1/41	0.12686	0.204604	7.65154	15.7979	TENT5C
Negative Regulation of Secretion by Cell (GO:1903531)	1/41	0.12686	0.204604	7.65154	15.7979	SNCA
Aortic Valve Development (GO:0003176)	1/41	0.12686	0.204604	7.65154	15.7979	HEYL
Odontogenesis (GO:0042476)	1/41	0.12686	0.204604	7.65154	15.7979	BCOR
Organelle Transport Along Microtubule (GO:0072384)	1/41	0.12686	0.204604	7.65154	15.7979	TRAK1
Positive Regulation of Immune System Process (GO:0002684)	1/41	0.12686	0.204604	7.65154	15.7979	TNFRSF18
Visual System Development (GO:0150063)	1/41	0.12686	0.204604	7.65154	15.7979	SCO2
Anterograde Trans-Synaptic Signaling (GO:0098916)	2/189	0.128948	0.20499	3.29997	6.75946	CHRNA10;SNCA
Notch Signaling Pathway (GO:0007219)	1/42	0.129747	0.20499	7.46454	15.2438	HEYL
Cardiac Ventricle Morphogenesis (GO:0003208)	1/42	0.129747	0.20499	7.46454	15.2438	HEYL
Response to cAMP (GO:0051591)	1/42	0.129747	0.20499	7.46454	15.2438	PDE4D
Digestive Tract Development (GO:0048565)	1/42	0.129747	0.20499	7.46454	15.2438	TNF
Type I Interferon-Mediated Signaling Pathway (GO:0060337)	1/42	0.129747	0.20499	7.46454	15.2438	IRAK1
Positive Regulation of Neuron Differentiation (GO:0045666)	1/42	0.129747	0.20499	7.46454	15.2438	HEYL
Lipid Catabolic Process (GO:0016042)	1/42	0.129747	0.20499	7.46454	15.2438	PLA1A
Protein Destabilization (GO:0031648)	1/42	0.129747	0.20499	7.46454	15.2438	SNCA
Regulation of NLRP3 Inflammasome Complex Assembly (GO:1900225)	1/42	0.129747	0.20499	7.46454	15.2438	HSPA8
Negative Regulation of Programmed Cell Death (GO:0043069)	3/382	0.132006	0.20499	2.45697	4.97513	BCL2L12;HSPA5;SNCA
Generation of Neurons (GO:0048699)	2/192	0.132275	0.20499	3.24737	6.56902	RIPK2;ID3
Negative Regulation of mRNA Catabolic Process (GO:1902373)	1/43	0.132625	0.20499	7.28645	14.7203	TENT5C
Negative Regulation of Organelle Assembly (GO:1902116)	1/43	0.132625	0.20499	7.28645	14.7203	TBC1D7
Regulation of Peptidyl-Tyrosine Phosphorylation (GO:0050730)	1/43	0.132625	0.20499	7.28645	14.7203	RIPK2
Cellular Response to Glucose Starvation (GO:0042149)	1/43	0.132625	0.20499	7.28645	14.7203	HSPA5
Release of Sequestered Calcium Ion Into Cytosol (GO:0051209)	1/43	0.132625	0.20499	7.28645	14.7203	ITPR1
Cellular Response to Type I Interferon (GO:0071357)	1/43	0.132625	0.20499	7.28645	14.7203	IRAK1
Synaptic Vesicle Exocytosis (GO:0016079)	1/43	0.132625	0.20499	7.28645	14.7203	SNCA
Positive Regulation of Myeloid Leukocyte Differentiation (GO:0002763)	1/43	0.132625	0.20499	7.28645	14.7203	TNF
Regulation of Chemokine Production (GO:0032642)	1/43	0.132625	0.20499	7.28645	14.7203	TNF
Regulation of Ossification (GO:0030278)	1/44	0.135494	0.20696	7.11664	14.225	ACVR1B
Peptidyl-Threonine Modification (GO:0018210)	1/44	0.135494	0.20696	7.11664	14.225	ACVR1B
Response to Unfolded Protein (GO:0006986)	1/44	0.135494	0.20696	7.11664	14.225	HSPA8
Positive Regulation of Cell Cycle G1/S Phase Transition (GO:1902808)	1/44	0.135494	0.20696	7.11664	14.225	EZH2
Substantia Nigra Development (GO:0021762)	1/44	0.135494	0.20696	7.11664	14.225	HSPA5
Regulated Exocytosis (GO:0045055)	1/44	0.135494	0.20696	7.11664	14.225	SNCA
Response to Endoplasmic Reticulum Stress (GO:0034976)	2/196	0.13674	0.208455	3.17977	6.3267	HSPA5;ITPR1
Regulation of Nitric Oxide Biosynthetic Process (GO:0045428)	1/45	0.138353	0.209275	6.95455	13.7557	TNF
Positive Regulation of Calcium Ion Transmembrane Transport (GO:1904427)	1/45	0.138353	0.209275	6.95455	13.7557	SNCA
Synaptic Vesicle Cycle (GO:0099504)	1/45	0.138353	0.209275	6.95455	13.7557	SNCA
Establishment of Protein Localization to Mitochondrion (GO:0072655)	1/45	0.138353	0.209275	6.95455	13.7557	TOMM40L
Defense Response to Virus (GO:0051607)	2/198	0.138986	0.209825	3.147	6.21025	IFIT1B;TNF
Regulation of Osteoclast Differentiation (GO:0045670)	1/46	0.141203	0.21194	6.79966	13.3107	TNF
Regulation of Transport (GO:0051049)	1/46	0.141203	0.21194	6.79966	13.3107	SNCA
Regulation of Calcium-Mediated Signaling (GO:0050848)	1/46	0.141203	0.21194	6.79966	13.3107	ITPR1
Regulation of Endothelial Cell Apoptotic Process (GO:2000351)	1/47	0.144043	0.21455	6.65151	12.8882	TNF
Cell Surface Receptor Signaling Pathway via JAK-STAT (GO:0007259)	1/47	0.144043	0.21455	6.65151	12.8882	TNF
Cellular Response to Radiation (GO:0071478)	1/47	0.144043	0.21455	6.65151	12.8882	TNF
Positive Regulation of miRNA Transcription (GO:1902895)	1/47	0.144043	0.21455	6.65151	12.8882	TNF
Regulation of Exocytosis (GO:0017157)	1/48	0.146874	0.217519	6.50966	12.4867	SNCA
Negative Regulation of Viral Genome Replication (GO:0045071)	1/48	0.146874	0.217519	6.50966	12.4867	TNF
Endoplasmic Reticulum Unfolded Protein Response (GO:0030968)	1/48	0.146874	0.217519	6.50966	12.4867	HSPA5
Positive Regulation of Epithelial to Mesenchymal Transition (GO:0010718)	1/49	0.149697	0.220442	6.37372	12.1046	EZH2
Positive Regulation of Smooth Muscle Cell Proliferation (GO:0048661)	1/49	0.149697	0.220442	6.37372	12.1046	TNF
Negative Regulation of TORC1 Signaling (GO:1904262)	1/49	0.149697	0.220442	6.37372	12.1046	TBC1D7
Positive Regulation of Multicellular Organismal Process (GO:0051240)	3/407	0.151051	0.221651	2.30198	4.35106	ACVR1B;TNF;EZH2
Regulation of Interleukin-12 Production (GO:0032655)	1/50	0.152509	0.221651	6.24333	11.7408	RIPK2
Regulation of Interleukin-2 Production (GO:0032663)	1/50	0.152509	0.221651	6.24333	11.7408	PDE4D
Cognition (GO:0050890)	1/50	0.152509	0.221651	6.24333	11.7408	TNF
Positive Regulation of Blood Vessel Endothelial Cell Migration (GO:0043536)	1/50	0.152509	0.221651	6.24333	11.7408	FGF18
Positive Regulation of Cell-Cell Adhesion (GO:0022409)	1/50	0.152509	0.221651	6.24333	11.7408	TNF
Positive Regulation of Non-Canonical NF-kappaB Signal Transduction (GO:1901224)	1/50	0.152509	0.221651	6.24333	11.7408	TNF
mRNA Splicing, via Spliceosome (GO:0000398)	2/211	0.153773	0.223071	2.94931	5.52193	HSPA8;PPIL1
Regulation of Interferon-Beta Production (GO:0032648)	1/51	0.155313	0.224469	6.11815	11.3939	RIPK2
Epithelial to Mesenchymal Transition (GO:0001837)	1/51	0.155313	0.224469	6.11815	11.3939	HEYL
Regulation of Synaptic Transmission, Glutamatergic (GO:0051966)	1/52	0.158108	0.226825	5.99789	11.063	TNF
Signal Transduction by P53 Class Mediator (GO:0072331)	1/52	0.158108	0.226825	5.99789	11.063	MUC1
Positive Regulation of Proteolysis (GO:0045862)	1/52	0.158108	0.226825	5.99789	11.063	TNF
Regulation of Cell Development (GO:0060284)	1/52	0.158108	0.226825	5.99789	11.063	HEYL
Negative Regulation of Protein Catabolic Process (GO:0042177)	1/53	0.160893	0.228715	5.88225	10.747	SNCA
Regulation of Microtubule Polymerization (GO:0031113)	1/53	0.160893	0.228715	5.88225	10.747	SNCA
Cellular Response to Ionizing Radiation (GO:0071479)	1/53	0.160893	0.228715	5.88225	10.747	TNF
Positive Regulation of miRNA Metabolic Process (GO:2000630)	1/53	0.160893	0.228715	5.88225	10.747	TNF
Positive Regulation of Small GTPase Mediated Signal Transduction (GO:0051057)	1/53	0.160893	0.228715	5.88225	10.747	ITGAV
Apical Junction Assembly (GO:0043297)	1/54	0.16367	0.231395	5.77097	10.4449	WDR1
Regulation of Smooth Muscle Cell Proliferation (GO:0048660)	1/54	0.16367	0.231395	5.77097	10.4449	TNF
Positive Regulation of Chemokine Production (GO:0032722)	1/54	0.16367	0.231395	5.77097	10.4449	TNF
Regulation of Cytokine Production Involved in Inflammatory Response (GO:1900015)	1/55	0.166437	0.232356	5.66382	10.156	TNF
RNA Modification (GO:0009451)	1/55	0.166437	0.232356	5.66382	10.156	ADARB1
Regulation of Metabolic Process (GO:0019222)	1/55	0.166437	0.232356	5.66382	10.156	TNF
Regulation of Peptide Hormone Secretion (GO:0090276)	1/55	0.166437	0.232356	5.66382	10.156	TNF
Cell Surface Receptor Signaling Pathway via STAT (GO:0097696)	1/55	0.166437	0.232356	5.66382	10.156	TNF
Positive Regulation of Protein Localization to Plasma Membrane (GO:1903078)	1/55	0.166437	0.232356	5.66382	10.156	TNF
Interferon-Mediated Signaling Pathway (GO:0140888)	1/55	0.166437	0.232356	5.66382	10.156	IRAK1
Cellular Response to Fibroblast Growth Factor Stimulus (GO:0044344)	1/56	0.169195	0.235363	5.56056	9.87946	FGF18
Receptor Internalization (GO:0031623)	1/56	0.169195	0.235363	5.56056	9.87946	SNCA
mRNA Processing (GO:0006397)	2/226	0.171197	0.237491	2.74972	4.85309	HSPA8;PPIL1
Cellular Response to Interleukin-1 (GO:0071347)	1/57	0.171945	0.237491	5.46099	9.61452	IRAK1
Heart Morphogenesis (GO:0003007)	1/57	0.171945	0.237491	5.46099	9.61452	HEYL
mRNA Stabilization (GO:0048255)	1/57	0.171945	0.237491	5.46099	9.61452	TENT5C
Cellular Response to Unfolded Protein (GO:0034620)	1/58	0.174685	0.237901	5.36491	9.36054	HSPA5
Sterol Metabolic Process (GO:0016125)	1/58	0.174685	0.237901	5.36491	9.36054	MSMO1
Eye Development (GO:0001654)	1/58	0.174685	0.237901	5.36491	9.36054	SCO2
Intracellular Iron Ion Homeostasis (GO:0006879)	1/58	0.174685	0.237901	5.36491	9.36054	FTMT
Positive Regulation of Type II Interferon Production (GO:0032729)	1/58	0.174685	0.237901	5.36491	9.36054	PDE4D
Protein K63-linked Ubiquitination (GO:0070534)	1/58	0.174685	0.237901	5.36491	9.36054	UBE2T
Mesenchymal Cell Differentiation (GO:0048762)	1/58	0.174685	0.237901	5.36491	9.36054	HEYL
Purine Ribonucleotide Metabolic Process (GO:0009150)	1/58	0.174685	0.237901	5.36491	9.36054	HSPA8
Cilium Organization (GO:0044782)	2/230	0.1759	0.238721	2.70093	4.69379	TCTN3;AVIL
Regulation of Autophagy (GO:0010506)	2/230	0.1759	0.238721	2.70093	4.69379	ITPR1;MAGEA6
Protein Homotetramerization (GO:0051289)	1/59	0.177416	0.239528	5.27215	9.11689	ITPR1
Mitotic DNA Damage Checkpoint Signaling (GO:0044773)	1/59	0.177416	0.239528	5.27215	9.11689	MUC1
Regulation of Bone Mineralization (GO:0030500)	1/59	0.177416	0.239528	5.27215	9.11689	BCOR
Neuron Migration (GO:0001764)	1/60	0.180139	0.241945	5.18253	8.88299	RIPK2
Response to Type II Interferon (GO:0034341)	1/60	0.180139	0.241945	5.18253	8.88299	SNCA
Protein Targeting to Mitochondrion (GO:0006626)	1/60	0.180139	0.241945	5.18253	8.88299	TOMM40L
ATP Metabolic Process (GO:0046034)	1/62	0.185558	0.247516	5.01211	8.44234	HSPA8
Antiviral Innate Immune Response (GO:0140374)	1/62	0.185558	0.247516	5.01211	8.44234	TNF
Regulation of Phagocytosis (GO:0050764)	1/62	0.185558	0.247516	5.01211	8.44234	ITGAV
Mitotic Cytokinesis (GO:0000281)	1/62	0.185558	0.247516	5.01211	8.44234	TRIM36
Positive Regulation of Interleukin-8 Production (GO:0032757)	1/63	0.188254	0.250683	4.93102	8.23463	TNF
Regulation of Synapse Assembly (GO:0051963)	1/64	0.190941	0.253395	4.8525	8.03474	SNCA
Epigenetic Regulation of Gene Expression (GO:0040029)	1/64	0.190941	0.253395	4.8525	8.03474	EZH2
Negative Regulation of Multicellular Organismal Process (GO:0051241)	2/243	0.191322	0.253469	2.55355	4.22306	ACVR1B;TNF
Anterior/Posterior Pattern Specification (GO:0009952)	1/65	0.193619	0.254042	4.77644	7.84226	HEYL
Pattern Recognition Receptor Signaling Pathway (GO:0002221)	1/65	0.193619	0.254042	4.77644	7.84226	IRAK1
Positive Regulation of Organelle Assembly (GO:1902117)	1/65	0.193619	0.254042	4.77644	7.84226	TNF
Glycerophospholipid Metabolic Process (GO:0006650)	1/65	0.193619	0.254042	4.77644	7.84226	PLA1A
Protein Autoubiquitination (GO:0051865)	1/65	0.193619	0.254042	4.77644	7.84226	UBE2T
Positive Regulation of Developmental Process (GO:0051094)	2/245	0.193711	0.254042	2.53228	4.15645	ACVR1B;TNF
Cilium Assembly (GO:0060271)	2/247	0.196105	0.255274	2.51135	4.09126	TCTN3;AVIL
Regulation of miRNA Transcription (GO:1902893)	1/66	0.196289	0.255274	4.70272	7.65682	TNF
Negative Regulation of Viral Process (GO:0048525)	1/66	0.196289	0.255274	4.70272	7.65682	TNF
Regulation of Type I Interferon Production (GO:0032479)	1/66	0.196289	0.255274	4.70272	7.65682	IRAK1
Protein-Containing Complex Disassembly (GO:0032984)	1/66	0.196289	0.255274	4.70272	7.65682	HSPA8
Regulation of RNA Biosynthetic Process (GO:2001141)	3/465	0.198242	0.256593	2.00701	3.24788	ACVR1B;NFKB2;EZH2
Regulation of Inflammatory Response (GO:0050727)	2/249	0.198502	0.256593	2.49076	4.02745	TNF;SNCA
Regulation of Protein Serine/Threonine Kinase Activity (GO:0071900)	1/67	0.19895	0.256593	4.63124	7.47806	EZH2
Cell-Cell Junction Assembly (GO:0007043)	1/67	0.19895	0.256593	4.63124	7.47806	WDR1
Negative Regulation of Cell Adhesion (GO:0007162)	1/67	0.19895	0.256593	4.63124	7.47806	MUC1
Cholesterol Metabolic Process (GO:0008203)	1/68	0.201602	0.259156	4.56188	7.30566	MSMO1
Regulation of Cell Communication (GO:0010646)	1/68	0.201602	0.259156	4.56188	7.30566	SCO2
Cytokine-Mediated Signaling Pathway (GO:0019221)	2/255	0.205716	0.264008	2.43095	3.84396	IRAK1;TNF
Regulation of Heart Contraction (GO:0008016)	1/70	0.206881	0.264197	4.42921	6.97871	PDE4D
Positive Regulation of Apoptotic Signaling Pathway (GO:2001235)	1/70	0.206881	0.264197	4.42921	6.97871	TNF
Negative Regulation of TOR Signaling (GO:0032007)	1/70	0.206881	0.264197	4.42921	6.97871	TBC1D7
Phagocytosis (GO:0006909)	1/71	0.209508	0.266677	4.36571	6.82359	ITGAV
Response to Ionizing Radiation (GO:0010212)	1/71	0.209508	0.266677	4.36571	6.82359	TNF
Lipid Metabolic Process (GO:0006629)	2/259	0.210542	0.267557	2.39263	3.72788	MSMO1;PLA1A
Regulation of MAPK Cascade (GO:0043408)	2/260	0.211751	0.268655	2.38324	3.6996	FGF18;TNF
Inflammatory Response (GO:0006954)	2/261	0.21296	0.269749	2.37391	3.67162	RIPK2;TNF
Heterochromatin Formation (GO:0031507)	1/73	0.214735	0.271116	4.24402	6.52879	EZH2
Positive Regulation of Protein Transport (GO:0051222)	1/73	0.214735	0.271116	4.24402	6.52879	TNF
Sensory Organ Development (GO:0007423)	1/74	0.217336	0.273956	4.18567	6.38864	SCO2
Regulation of Fat Cell Differentiation (GO:0045598)	1/75	0.219928	0.276329	4.1289	6.25303	TNF
Positive Regulation of Secretion by Cell (GO:1903532)	1/75	0.219928	0.276329	4.1289	6.25303	SNCA
Regulation of Neuron Differentiation (GO:0045664)	1/76	0.222512	0.278677	4.07364	6.12176	HEYL
Positive Regulation of Protein Localization to Membrane (GO:1905477)	1/76	0.222512	0.278677	4.07364	6.12176	TNF
Regulation of Non-Canonical NF-kappaB Signal Transduction (GO:1901222)	1/77	0.225088	0.280999	4.01984	5.99465	TNF
Positive Regulation of Interleukin-6 Production (GO:0032755)	1/77	0.225088	0.280999	4.01984	5.99465	TNF
Regulation of Cell Cycle G1/S Phase Transition (GO:1902806)	1/79	0.230213	0.286938	3.91637	5.75216	EZH2
Negative Regulation of Signal Transduction (GO:0009968)	2/277	0.232392	0.288272	2.23398	3.26011	TNF;SNCA
Regulation of mRNA Stability (GO:0043488)	1/80	0.232764	0.288272	3.8666	5.63647	TENT5C
Signal Transduction in Response to DNA Damage (GO:0042770)	1/80	0.232764	0.288272	3.8666	5.63647	MUC1
Regulation of TOR Signaling (GO:0032006)	1/80	0.232764	0.288272	3.8666	5.63647	TBC1D7
Positive Regulation of JNK Cascade (GO:0046330)	1/81	0.235306	0.290496	3.81808	5.52426	TNF
Regulation of Catabolic Process (GO:0009894)	1/81	0.235306	0.290496	3.81808	5.52426	ITPR1
Regulation of Cilium Assembly (GO:1902017)	1/83	0.240365	0.294873	3.72458	5.30975	TBC1D7
Regulation of Interleukin-8 Production (GO:0032677)	1/83	0.240365	0.294873	3.72458	5.30975	TNF
Negative Regulation of Protein Phosphorylation (GO:0001933)	1/83	0.240365	0.294873	3.72458	5.30975	SNCA
Regulation of Protein Kinase Activity (GO:0045859)	1/83	0.240365	0.294873	3.72458	5.30975	SNCA
Cytoskeleton-Dependent Cytokinesis (GO:0061640)	1/84	0.242882	0.296096	3.67952	5.20718	TRIM36
Positive Regulation of Synaptic Transmission (GO:0050806)	1/84	0.242882	0.296096	3.67952	5.20718	TNF
+ Reg of Transmembrane Receptor Prot Serine/Threonine Kinase Sgnlng Pway (GO:0090100)	1/84	0.242882	0.296096	3.67952	5.20718	ACVR1B
Monoatomic Cation Homeostasis (GO:0055080)	1/84	0.242882	0.296096	3.67952	5.20718	SNCA
Negative Regulation of Transforming Growth Factor Beta Receptor Signaling Pathway (GO:0030512)	1/85	0.245391	0.297294	3.63553	5.10756	ADAMTSL2
Cell Morphogenesis Involved in Neuron Differentiation (GO:0048667)	1/85	0.245391	0.297294	3.63553	5.10756	RIPK2
Ribosomal Small Subunit Biogenesis (GO:0042274)	1/85	0.245391	0.297294	3.63553	5.10756	NOP56
Positive Regulation of Endocytosis (GO:0045807)	1/85	0.245391	0.297294	3.63553	5.10756	SNCA
Integrin-Mediated Signaling Pathway (GO:0007229)	1/86	0.247892	0.299857	3.59258	5.01079	ITGAV
Regulation of Endothelial Cell Proliferation (GO:0001936)	1/87	0.250385	0.301003	3.55063	4.91675	FGF18
Calcium Ion Transmembrane Transport (GO:0070588)	1/87	0.250385	0.301003	3.55063	4.91675	ITGAV
Cellular Response to Tumor Necrosis Factor (GO:0071356)	1/87	0.250385	0.301003	3.55063	4.91675	TNF
Positive Regulation of Biosynthetic Process (GO:0009891)	1/87	0.250385	0.301003	3.55063	4.91675	TNF
Regulation of Type II Interferon Production (GO:0032649)	1/88	0.252869	0.302589	3.50964	4.82534	PDE4D
Positive Regulation of Endothelial Cell Migration (GO:0010595)	1/88	0.252869	0.302589	3.50964	4.82534	FGF18
Positive Regulation of Protein Kinase Activity (GO:0045860)	1/88	0.252869	0.302589	3.50964	4.82534	EZH2
Cellular Response to Hormone Stimulus (GO:0032870)	1/89	0.255346	0.305083	3.46958	4.73645	HSPA8
Regulation of Protein Localization to Plasma Membrane (GO:1903076)	1/90	0.257814	0.306154	3.43042	4.65	TNF
Positive Regulation of Plasma Membrane Bounded Cell Projection Assembly (GO:0120034)	1/90	0.257814	0.306154	3.43042	4.65	AVIL
Protein Dephosphorylation (GO:0006470)	1/90	0.257814	0.306154	3.43042	4.65	PTPRB
Mitochondrial Respiratory Chain Complex Assembly (GO:0033108)	1/90	0.257814	0.306154	3.43042	4.65	SCO2
Regulation of Epithelial to Mesenchymal Transition (GO:0010717)	1/91	0.260274	0.307203	3.39214	4.56588	EZH2
ERAD Pathway (GO:0036503)	1/91	0.260274	0.307203	3.39214	4.56588	HSPA5
Protein K48-linked Ubiquitination (GO:0070936)	1/91	0.260274	0.307203	3.39214	4.56588	UBE2T
Protein O-linked Glycosylation (GO:0006493)	1/91	0.260274	0.307203	3.39214	4.56588	TRAK1
Sensory Perception of Mechanical Stimulus (GO:0050954)	1/92	0.262727	0.309436	3.35469	4.48402	WDR1
Regulation of Intracellular Signal Transduction (GO:1902531)	2/302	0.262961	0.309436	2.04521	2.73188	ITGAV;TNF
Regulation of Epithelial Cell Proliferation (GO:0050678)	1/93	0.265171	0.310162	3.31806	4.40433	FGF18
Regulation of Insulin Secretion (GO:0050796)	1/93	0.265171	0.310162	3.31806	4.40433	TNF
Positive Regulation of Cellular Component Biogenesis (GO:0044089)	1/93	0.265171	0.310162	3.31806	4.40433	TNF
Negative Regulation of Angiogenesis (GO:0016525)	1/93	0.265171	0.310162	3.31806	4.40433	TNF
Positive Regulation of Phosphorylation (GO:0042327)	1/94	0.267607	0.312543	3.28222	4.32673	TNF
Regulation of DNA-templated Transcription (GO:0006355)	9/2139	0.271014	0.316048	1.31979	1.7231	HSPA8;HEYL;ID3;BCOR;ACVR1B;TRAK1;TNF;NFKB2;EZH2
Sensory Perception of Sound (GO:0007605)	1/96	0.272456	0.317254	3.21279	4.17753	WDR1
Regulation of mRNA Splicing, via Spliceosome (GO:0048024)	1/97	0.274868	0.319109	3.17917	4.10578	RBM39
Regulation of TORC1 Signaling (GO:1903432)	1/97	0.274868	0.319109	3.17917	4.10578	TBC1D7
Positive Regulation of Protein Modification Process (GO:0031401)	1/98	0.277273	0.320944	3.14623	4.03584	TNF
rRNA Metabolic Process (GO:0016072)	1/98	0.277273	0.320944	3.14623	4.03584	NOP56
Regulation of Protein Secretion (GO:0050708)	1/99	0.27967	0.322282	3.11397	3.96766	TNF
Positive Regulation of Neuron Projection Development (GO:0010976)	1/99	0.27967	0.322282	3.11397	3.96766	AVIL
Positive Regulation of Protein Catabolic Process (GO:0045732)	1/99	0.27967	0.322282	3.11397	3.96766	TNF
Cellular Response to Chemical Stress (GO:0062197)	1/100	0.282059	0.324555	3.08236	3.90116	SNCA
Chromatin Organization (GO:0006325)	2/323	0.288687	0.331692	1.90937	2.37222	BCOR;EZH2
Regulation of RNA Splicing (GO:0043484)	1/104	0.291536	0.334473	2.96206	3.65101	RBM39
Calcium Ion Homeostasis (GO:0055074)	1/105	0.293887	0.336673	2.93343	3.59217	SNCA
Steroid Metabolic Process (GO:0008202)	1/106	0.296229	0.338858	2.90535	3.53471	MSMO1
Axon Development (GO:0061564)	1/107	0.298564	0.339535	2.87779	3.4786	RIPK2
Cell-Matrix Adhesion (GO:0007160)	1/107	0.298564	0.339535	2.87779	3.4786	ITGAV
Dephosphorylation (GO:0016311)	1/107	0.298564	0.339535	2.87779	3.4786	PTPRB
Protein Catabolic Process (GO:0030163)	1/107	0.298564	0.339535	2.87779	3.4786	HSPA8
Positive Regulation of Vasculature Development (GO:1904018)	1/109	0.303211	0.344316	2.82422	3.37022	FGF18
Negative Regulation of Gene Expression, Epigenetic (GO:0045814)	1/110	0.305523	0.345933	2.79817	3.31787	EZH2
rRNA Processing (GO:0006364)	1/110	0.305523	0.345933	2.79817	3.31787	NOP56
Supramolecular Fiber Organization (GO:0097435)	2/339	0.308237	0.3485	1.81723	2.13867	AVIL;SNCA
Mitotic Cell Cycle Phase Transition (GO:0044772)	1/113	0.312413	0.35271	2.7228	3.16778	ACVR1B
Regulation of Interleukin-6 Production (GO:0032675)	1/114	0.314695	0.353756	2.69857	3.11995	TNF
Transforming Growth Factor Beta Receptor Superfamily Signaling Pathway (GO:0141091)	1/114	0.314695	0.353756	2.69857	3.11995	ACVR1B
Regulation of Gene Expression (GO:0010468)	5/1127	0.314702	0.353756	1.3743	1.58887	ACTA1;ACVR1B;TNF;NFKB2;EZH2
Organelle Assembly (GO:0070925)	2/346	0.316763	0.35426	1.77961	2.04585	TCTN3;AVIL
Positive Regulation of Cell Projection Organization (GO:0031346)	1/115	0.31697	0.35426	2.67476	3.07317	AVIL
Intrinsic Apoptotic Signaling Pathway (GO:0097193)	1/115	0.31697	0.35426	2.67476	3.07317	ITPR1
Regulation of JNK Cascade (GO:0046328)	1/115	0.31697	0.35426	2.67476	3.07317	TNF
Cytoskeleton Organization (GO:0007010)	1/117	0.321496	0.358291	2.62838	2.98261	FMNL3
Modulation of Chemical Synaptic Transmission (GO:0050804)	1/117	0.321496	0.358291	2.62838	2.98261	TNF
Positive Regulation of Epithelial Cell Proliferation (GO:0050679)	1/118	0.323749	0.360286	2.60579	2.93877	TNF
Positive Regulation of Macromolecule Biosynthetic Process (GO:0010557)	2/355	0.327692	0.363715	1.73345	1.93397	ACTA1;TNF
Regulation of Transforming Growth Factor Beta Receptor Signaling Pathway (GO:0017015)	1/120	0.328231	0.363715	2.56173	2.85387	ADAMTSL2
Ribonucleoprotein Complex Biogenesis (GO:0022613)	1/120	0.328231	0.363715	2.56173	2.85387	NOP56
Cellular Response to Oxidative Stress (GO:0034599)	1/121	0.330461	0.365148	2.54026	2.81274	SNCA
Enzyme-Linked Receptor Protein Signaling Pathway (GO:0007167)	1/121	0.330461	0.365148	2.54026	2.81274	ACVR1B
- Reg of Transmembrane Receptor Prot Serine/Threonine Kinase Sgnlng Pway (GO:0090101)	1/122	0.332684	0.367084	2.51914	2.77246	ADAMTSL2
Negative Regulation of Gene Expression (GO:0010629)	2/364	0.338578	0.373058	1.68957	1.82981	TNF;EZH2
Cellular Response to Lipopolysaccharide (GO:0071222)	1/125	0.339309	0.373336	2.45782	2.65651	IRAK1
Positive Regulation of Angiogenesis (GO:0045766)	1/126	0.341503	0.374692	2.43803	2.61941	FGF18
Regulation of Cell Motility (GO:2000145)	1/126	0.341503	0.374692	2.43803	2.61941	FGF18
Monocarboxylic Acid Metabolic Process (GO:0032787)	1/127	0.34369	0.376561	2.41856	2.58306	MSMO1
Regulation of Neuron Apoptotic Process (GO:0043523)	1/129	0.348042	0.38026	2.38053	2.51248	TNF
Regulation of Protein Catabolic Process (GO:0042176)	1/129	0.348042	0.38026	2.38053	2.51248	TNF
Protein Phosphorylation (GO:0006468)	2/373	0.349414	0.381223	1.64783	1.73269	IRAK1;ACVR1B
Fatty Acid Metabolic Process (GO:0006631)	1/130	0.350208	0.381555	2.36196	2.47823	MSMO1
Circulatory System Development (GO:0072359)	1/132	0.354517	0.385173	2.32566	2.4117	BCOR
Protein Localization to Plasma Membrane (GO:0072659)	1/132	0.354517	0.385173	2.32566	2.4117	TNF
Gene Expression (GO:0010467)	2/381	0.358998	0.389498	1.61238	1.65179	RBM39;ADARB1
Mitochondrion Organization (GO:0007005)	1/135	0.360929	0.391048	2.27325	2.31661	SCO2
Cellular Response to Oxygen-Containing Compound (GO:1901701)	2/384	0.36258	0.391173	1.59948	1.62269	RIPK2;PDE4D
Protein Localization to Cell Periphery (GO:1990778)	1/136	0.363052	0.391173	2.2563	2.2861	TNF
Protein Targeting (GO:0006605)	1/136	0.363052	0.391173	2.2563	2.2861	TRAK1
Receptor-Mediated Endocytosis (GO:0006898)	1/136	0.363052	0.391173	2.2563	2.2861	SNCA
Regulation of Protein Phosphorylation (GO:0001932)	1/137	0.365169	0.392909	2.23959	2.25616	TNF
Negative Regulation of Cell Motility (GO:2000146)	1/139	0.369381	0.396893	2.20691	2.19792	ADARB1
Intracellular Calcium Ion Homeostasis (GO:0006874)	1/140	0.371476	0.398595	2.19092	2.16961	ITPR1
Protein Glycosylation (GO:0006486)	1/145	0.381852	0.409164	2.11432	2.0355	TRAK1
Negative Regulation of Protein Metabolic Process (GO:0051248)	1/146	0.383907	0.410801	2.09963	2.01009	ITGAV
Phosphate-Containing Compound Metabolic Process (GO:0006796)	1/150	0.392059	0.418375	2.04285	1.91281	PTPRB
Cellular Response to Growth Factor Stimulus (GO:0071363)	1/150	0.392059	0.418375	2.04285	1.91281	ACVR1B
Positive Regulation of ERK1 and ERK2 Cascade (GO:0070374)	1/153	0.398103	0.424244	2.00223	1.84414	TNF
Neuron Projection Morphogenesis (GO:0048812)	1/157	0.40607	0.431553	1.95049	1.75784	RIPK2
Regulation of Small GTPase Mediated Signal Transduction (GO:0051056)	1/157	0.40607	0.431553	1.95049	1.75784	ITGAV
Ribosome Biogenesis (GO:0042254)	1/161	0.413933	0.43931	1.90135	1.67708	NOP56
+ Reg of Phosphatidylinositol 3-Kinase/Prot Kinase B Signal Transduction (GO:0051897)	1/162	0.415883	0.440779	1.88944	1.6577	TNF
Positive Regulation of Gene Expression (GO:0010628)	2/436	0.423372	0.448107	1.40409	1.20682	ACTA1;TNF
Heart Development (GO:0007507)	1/171	0.433145	0.457829	1.7886	1.49649	BCOR
Regulation of Cytokine Production (GO:0001817)	1/172	0.435032	0.4592	1.77805	1.47993	TNF
Membrane Organization (GO:0061024)	1/173	0.436912	0.460561	1.76762	1.46363	HSPA8
Regulation of Neuron Projection Development (GO:0010975)	1/176	0.442517	0.465839	1.73705	1.41618	AVIL
Metal Ion Transport (GO:0030001)	1/180	0.449905	0.472977	1.69789	1.35614	ITPR1
Neuron Differentiation (GO:0030182)	1/181	0.451737	0.474263	1.68838	1.34168	ID3
Negative Regulation of Cell Migration (GO:0030336)	1/184	0.457196	0.479348	1.66045	1.29954	ADARB1
Negative Regulation of Cytokine Production (GO:0001818)	1/191	0.469727	0.491825	1.5987	1.20799	TNF
Regulation of Programmed Cell Death (GO:0043067)	1/195	0.47676	0.498518	1.56542	1.15958	TNF
Protein Localization to Membrane (GO:0072657)	1/199	0.4837	0.505097	1.53349	1.11376	TNF
Axonogenesis (GO:0007409)	1/200	0.485421	0.506216	1.52571	1.10269	RIPK2
Negative Regulation of Macromolecule Biosynthetic Process (GO:0010558)	1/202	0.488846	0.508426	1.51037	1.08098	TNF
Positive Regulation of Protein Metabolic Process (GO:0051247)	1/202	0.488846	0.508426	1.51037	1.08098	TNF
Intracellular Monoatomic Cation Homeostasis (GO:0030003)	1/210	0.502323	0.521746	1.45197	0.999699	FTMT
Regulation of Signal Transduction (GO:0009966)	1/211	0.503982	0.522077	1.44498	0.990122	IRAK1
Regulation of Angiogenesis (GO:0045765)	1/211	0.503982	0.522077	1.44498	0.990122	FGF18
Regulation of Phosphatidylinositol 3-Kinase/Protein Kinase B Signal Transduction (GO:0051896)	1/219	0.517066	0.534919	1.39139	0.917741	TNF
Defense Response to Bacterium (GO:0042742)	1/221	0.520283	0.537534	1.3786	0.900754	RIPK2
Regulation of Cell Growth (GO:0001558)	1/222	0.521884	0.538473	1.37229	0.892417	ACVR1B
Regulation of ERK1 and ERK2 Cascade (GO:0070372)	1/223	0.523479	0.539405	1.36604	0.884182	TNF
Protein Polyubiquitination (GO:0000209)	1/228	0.531378	0.546821	1.33562	0.844484	UBE2T
Apoptotic Process (GO:0006915)	1/232	0.537605	0.551771	1.31222	0.814406	RIPK2
Translation (GO:0006412)	1/232	0.537605	0.551771	1.31222	0.814406	2002-03-01
Cellular Response to Lipid (GO:0071396)	1/234	0.540687	0.554204	1.30083	0.799896	HSPA8
Positive Regulation of Signal Transduction (GO:0009967)	1/256	0.573288	0.586848	1.18727	0.660559	ITGAV
Chromatin Remodeling (GO:0006338)	1/262	0.581776	0.594755	1.15962	0.628133	BCOR
Protein Metabolic Process (GO:0019538)	2/614	0.605758	0.618461	0.986622	0.494569	ADAM23;SNCA
Central Nervous System Development (GO:0007417)	1/288	0.616677	0.628785	1.05318	0.509116	ADAM23
Cell Surface Receptor Protein Tyrosine Kinase Signaling Pathway (GO:0007169)	1/296	0.626827	0.638298	1.0242	0.478387	FGF18
DNA Metabolic Process (GO:0006259)	1/302	0.634265	0.644188	1.00348	0.456871	UBE2T
DNA Repair (GO:0006281)	1/302	0.634265	0.644188	1.00348	0.456871	UBE2T
Monoatomic Cation Transmembrane Transport (GO:0098655)	1/304	0.636712	0.645832	0.99675	0.449971	ITGAV
Inorganic Cation Transmembrane Transport (GO:0098662)	1/307	0.640352	0.648679	0.986828	0.439866	ITGAV
Regulation of Cell Cycle (GO:0051726)	1/318	0.653394	0.661031	0.95205	0.405169	ADARB1
Proteolysis (GO:0006508)	1/321	0.656869	0.663685	0.942981	0.396307	ADAM23
Protein-Containing Complex Assembly (GO:0065003)	1/323	0.659167	0.665144	0.937028	0.390533	SNCA
Protein Ubiquitination (GO:0016567)	1/369	0.708026	0.713522	0.817977	0.282426	UBE2T
Proteasomal Protein Catabolic Process (GO:0010498)	1/372	0.710961	0.715554	0.811238	0.276744	HSPA5
Negative Regulation of Cell Population Proliferation (GO:0008285)	1/379	0.717697	0.721401	0.79593	0.264016	ADARB1
DNA Damage Response (GO:0006974)	1/421	0.754986	0.757904	0.714799	0.200899	UBE2T
Organelle Organization (GO:0006996)	1/437	0.767876	0.769853	0.688003	0.18172	FMNL3
Protein Modification Process (GO:0036211)	1/545	0.839018	0.840096	0.54836	0.0962498	PTPRB
Positive Regulation of RNA Biosynthetic Process (GO:1902680)	1/555	0.844398	0.844398	0.538184	0.0910239	TNF

## Sheet: Diabetes Perturbations
Term	Overlap	P-value	Adjusted P-value	Odds Ratio	Combined Score	Genes
GSE131320 Ctrl-vs-IL-1OE 6Hr Hs Islet Dn	6/233	0.000118824	0.0395685	8.6815	78.4622	TNFRSF18;TNFAIP2;TRIM36;ICAM4;TNF;NFKB2
GSE131320 BacteroidesDorei 6Hr Hs Islet Dn	5/212	0.0006749	0.080996	7.81144	57.0309	TNFRSF18;TNFAIP2;ICAM4;TNF;NFKB2
GSE131320 RuminococcusGnavus 6Hr Hs Islet Dn	5/226	0.00089956	0.080996	7.3114	51.2793	TNFRSF18;TNFAIP2;ICAM4;TNF;NFKB2
GSE131320 EscherichiaColi 6Hr Hs Islet Dn	5/230	0.000972925	0.080996	7.17996	49.7945	TNFRSF18;TNFAIP2;ICAM4;TNF;NFKB2
GSE143319 Pre-PostlbLoss Hs SubcutAdipose Up	4/173	0.00256755	0.170999	7.54533	45.0064	IFIT1B;FGF18;HBD;SNCA
GSE131320 BacteroidesDorei 24Hr Hs Islet Dn	4/201	0.00438959	0.18527	6.46373	35.0885	FGF18;ICAM4;TNF;NFKB2
GSE135391 RoomTemp-vs-Cold Old Mm BAT Dn	4/202	0.00446731	0.18527	6.43076	34.7966	ACTA1;HSPA8;SCO2;IFRD1
GSE131320 RuminococcusGnavus 24Hr Hs Islet Dn	4/212	0.00529622	0.18527	6.11849	32.0655	TNFRSF18;ICAM4;TNF;NFKB2
GSE135391 RoomTemp-vs-Cold Young Mm BAT Dn	4/214	0.00547354	0.18527	6.0596	31.5574	ACTA1;HSPA8;SCO2;PDE4D
GSE101722 ProinflamCytokines Mm Islet Up	4/215	0.00556367	0.18527	6.03058	31.3077	HEYL;PTPRB;ADAMTSL2;C1QTNF5
GSE131320 EscherichiaColi 24Hr Hs Islet Dn	4/221	0.00612541	0.185433	5.86205	29.869	TNFRSF18;ICAM4;TNF;NFKB2
GSE143482 TGF-B1 Hs EsophagusFibroblasts Dn	4/238	0.00791918	0.219757	5.43149	26.2801	ACTA1;HEYL;ADAMTSL2;FGF18
GSE149468 Fasting-22Hrs Mm Cerebellum Up	3/153	0.0141345	0.337087	6.28063	26.7501	MUC1;MFRP;TNFRSF18
GSE43106 FatDiet C57BL 6NTac Mm Chip Liver Up	3/155	0.0146317	0.337087	6.19737	26.1812	ID3;TOMM40L;PLA1A
GSE129020 PHOSPHO1-Knockout Mm BAT Dn	3/162	0.0164499	0.337087	5.92243	24.326	MFRP;SCO2;TNFRSF18
GSE109285 Mature-OE-vs-OE-ExpressPDX1 Mm Up	3/168	0.018105	0.337087	5.70534	22.8874	HEYL;NAT1;PLA1A
GSE90531 HDAC3f f;Cre-HDAC3betaKO Mm Islet Dn	3/171	0.0189661	0.337087	5.60261	22.2149	MSMO1;TNF;CBLN2
GSE43106 FatDiet C57BL 6J Mm Chip Liver Up	3/174	0.0198498	0.337087	5.50348	21.5712	TBC1D7;SEC23B;PLA1A
GSE106148 Type1Diabetes Hs Islet Up	3/177	0.0207559	0.337087	5.40777	20.9547	ACTA1;UBE2T;FGF18
GSE43106 FatDiet C3HeB FeJ Mm Chip Liver Up	3/179	0.0213725	0.337087	5.34578	20.558	ACTA1;ID3;PLA1A
GSE149468 Fasting-8Hrs Mm Cerebellum Dn	3/180	0.0216845	0.337087	5.31531	20.3638	HSPA5;AVIL;CBLN2
GSE112213 LdlrKO Mm Macrophage Up	3/184	0.0229577	0.337087	5.19679	19.6132	FAM124A;PDE4D;ICAM4
GSE150679 CdCl2 M PostnatalDay42 Mm Liver Dn	3/185	0.0232823	0.337087	5.16797	19.4319	MUC1;PDE4D;JPH1
GSE150679 CdCl2 PostnatalDay1 Mm Liver Up	3/197	0.0273723	0.37979	4.84536	17.4347	ACTA1;NAT1;JPH1
GSE26978 Rbp2flfRIP-Cre Mm Chip Islets Dn	3/206	0.0306758	0.389008	4.62843	16.1268	HSPA8;MSMO1;TOMM40L
GSE37248 FXR-Overexpression Mm Chip WAT Dn	3/210	0.0322087	0.389008	4.53807	15.5906	ACTA1;ADAMTSL2;ADAM23
GSE108413 Ctrl-vs-Cytokines Hs Islet Dn	3/214	0.0337812	0.389008	4.45114	15.0798	IFIT1B;ICAM4;PLA1A
GSE109285 Mature Cells Mm 2CellTypes Up	3/214	0.0337812	0.389008	4.45114	15.0798	HEYL;NAT1;ID3
GSE137136 ProInflamCytokine Hs EndoC--H1 Dn	3/218	0.0353932	0.389008	4.36744	14.5927	RIPK2;TNF;PLA1A
GSE40439 PGC-1Tg Mm Chip Muscle Dn	3/220	0.0362139	0.389008	4.32675	14.3575	SLC25A39;TNFAIP2;VOPP1
GSE101722 ML351+ProinflamCytokine Mm Islet Up	3/220	0.0362139	0.389008	4.32675	14.3575	HEYL;PTPRB;ADAMTSL2
GSE140230 CtrlPBS-vs-Sirolimus Hs Islet Up	2/103	0.045524	0.473734	6.13645	18.9587	FTMT;TNF
GSE140230 CtrlPBS-vs-Sirolimus Hs Islet Dn	2/134	0.0724107	0.534704	4.68797	12.3078	MFRP;HBD
GSE157585 Metformin NoResTrain Hs Muscle Dn	2/138	0.0761824	0.534704	4.54917	11.7124	HBD;SNCA
GSE153222 FatDiet 8Wks Mm Islet Dn	2/139	0.077135	0.534704	4.51574	11.5702	SCO2;ICAM4
GSE149468 Fasting-2Hrs Mm Cerebellum Dn	2/142	0.0800157	0.534704	4.4183	11.1586	ICAM4;CBLN2
GSE143319 HealthyvsObese Hs SubcutAdipose Dn	2/147	0.0848904	0.534704	4.26487	10.5189	HBD;TNF
GSE153222 FatDiet 20Wks Mm Liver Up	2/151	0.0888541	0.534704	4.14954	10.045	AVIL;MSMO1
GSE41203 NOD.RAG-NonObeseDiab 6Wks Mm Chip Islets Dn	2/151	0.0888541	0.534704	4.14954	10.045	PDE4D;EZH2
GSE114192 IntermedHyperglycemia SouthAfrica Hs Blood Dn	2/152	0.0898537	0.534704	4.12167	9.93146	UBE2T;IFIT1B
GSE73036 FatDiet Day5 Mm Chip Muscle Up	2/158	0.0959206	0.534704	3.96194	9.28772	HSPA5;TNFAIP2
GSE115421 Rosiglitazone P3 Hs Adipocytes Up	2/159	0.0969431	0.534704	3.9365	9.18635	FGF18;PLA1A
GSE90531 Tam-HDAC3betaKO Mm BulkRNA-seq Islet Up	2/160	0.0979687	0.534704	3.91139	9.08658	ACTA1;SCO2
GSE153222 FatDiet 8Wks Mm Liver Up	2/161	0.0989975	0.534704	3.8866	8.98838	ID3;SNCA
GSE73036 FatDiet Day42 Mm Chip Muscle Up	2/161	0.0989975	0.534704	3.8866	8.98838	RBM39;TNFAIP2
GSE145202 SH2B1adKO Mm Hypothalamus Up	2/162	0.100029	0.534704	3.86211	8.8917	MFRP;CHRNA10
GSE155064 LowBCAA-Diet Males Mm Muscle Up	2/166	0.104187	0.534704	3.76715	8.51967	TNFAIP2;TNF
GSE115421 -Rosiglitazone P4 Hs Adipocytes Up	2/168	0.106284	0.534704	3.72139	8.34202	FGF18;SNCA
GSE122348 Ctrl- REGN1193 ChowDiet Mm Liver Dn	2/170	0.108392	0.534704	3.67671	8.16967	ACTA1;MFRP
GSE43106 FatDiet129P2 OlaHsd Mm Chip Liver Up	2/170	0.108392	0.534704	3.67671	8.16967	ID3;PLA1A
GSE101207 NonDiabetic-vs-T2D Hs Islet Dn	2/170	0.108392	0.534704	3.67671	8.16967	TNFRSF18;FGF18
GSE109285 30DaysAfterDT Mm 2CellTypes Up	2/174	0.112641	0.534704	3.59048	7.83998	HEYL;NAT1
GSE94846 PAX8-Overexpression Mm Chip Islet Up	2/176	0.114783	0.534704	3.54885	7.68225	MUC1;PDE4D
GSE41203 Obese 6Wks Mm Chip Islets Up	2/176	0.114783	0.534704	3.54885	7.68225	HSPA8;IFRD1
GSE122348 REGN1193 FatDiet Mm Liver Up	2/176	0.114783	0.534704	3.54885	7.68225	FGF18;SNCA
GSE114192 Healthy-vs-Diabetes Hs Blood Up	2/179	0.118014	0.534704	3.48817	7.45405	ADAMTSL2;CBLN2
GSE87354 Rpl13a-snoless Mm Islet Up	2/180	0.119097	0.534704	3.4684	7.38013	AVIL;ADAMTSL2
GSE154198 Passage8 Hs Chip Hepatocyte Dn	2/181	0.120181	0.534704	3.44885	7.30725	PDE4D;FGF18
GSE149468 Fasting-22Hrs Mm Cerebellum Dn	2/183	0.122359	0.534704	3.41039	7.16455	ICAM4;CBLN2
GSE59141 PRLR Mm Chip Islet Dn	2/184	0.123451	0.534704	3.39148	7.09468	NOP56;IFRD1
GSE149468 Fasting-12Hrs Mm Stomach Up	2/184	0.123451	0.534704	3.39148	7.09468	ACTA1;SCO2
GSE26978 Men1flf-Rbp2flfRIP Mm Chip Islets Dn	2/185	0.124546	0.534704	3.37278	7.02578	HSPA8;MSMO1
GSE149468 Fasting-12Hrs Mm Brain Up	2/186	0.125643	0.534704	3.35428	6.95782	MFRP;TNFRSF18
GSE80780 Beta2-vs-Beta4 Hs Islet Dn	2/187	0.126742	0.534704	3.33598	6.89079	FGF18;CBLN2
GSE149468 Fasting-18Hrs Mm Posterior-SubcutWAT Up	2/187	0.126742	0.534704	3.33598	6.89079	SCO2;CBLN2
GSE73436 HomozygAMPK-R299Q-K-in Mm Brain Up	2/187	0.126742	0.534704	3.33598	6.89079	FMNL3;JPH1
GSE110569 wt-vs-alb-SREBP-1a Mm Chip Liver Up	2/188	0.127844	0.534704	3.31788	6.82468	NOP56;PLA1A
GSE74113 Cre-T-vs-Cre+T Mm Islet Up	2/188	0.127844	0.534704	3.31788	6.82468	NAT1;AVIL
GSE149468 Fasting-18hs Mm InterscapularBAT Up	2/189	0.128948	0.534704	3.29997	6.75946	FGF18;TNF
GSE41203 2Vs8Wk NonObeseDiab Mm Chip Islets Up	2/190	0.130055	0.534704	3.28225	6.69512	PDE4D;IFRD1
GSE114192 HealthyvsDiabetes Hs WholeBlood Dn	2/190	0.130055	0.534704	3.28225	6.69512	UBE2T;HBD
GSE154198 Passage113 Hs Chip Hepatocyte Dn	2/192	0.132275	0.534704	3.24737	6.56902	MAGEA6;SNCA
GSE153222 FatDiet 16Wks Mm Islet Up	2/194	0.134503	0.534704	3.21322	6.44625	MUC1;CBLN2
GSE136134 Ctrl-vs-Insulin 24Hrs Hs hiPSCs Dn	2/194	0.134503	0.534704	3.21322	6.44625	ACTA1;PDE4D
GSE80780 Beta2-vs-Beta3 Hs Islet Dn	2/195	0.135621	0.534704	3.19641	6.38608	ADAM23;FGF18
GSE41203 2Vs4Wk NonObeseDiab Mm Chip Islets Up	2/195	0.135621	0.534704	3.19641	6.38608	PDE4D;IFRD1
GSE101537 p300-KO Mm Islet Dn	2/197	0.137862	0.534704	3.1633	6.26809	C1QTNF5;TNF
GSE143482 LIGHT Hs EsophagusFibroblasts Dn	2/199	0.140112	0.534704	3.13087	6.15315	PLA1A;NFKB2
GSE100067 Islet-Lung Mm MacrophNODShiLtJ Dn	2/199	0.140112	0.534704	3.13087	6.15315	ADAM23;FGF18
GSE80780 Beta1-vs-Beta2 Hs Islet Dn	2/200	0.141239	0.534704	3.1149	6.09679	ACTA1;PLA1A
GSE153222 FatDiet 12Wks Mm Islet Up	2/200	0.141239	0.534704	3.1149	6.09679	MUC1;CBLN2
GSE109285 Mature-OE-OE-Express-PDX1 Mm Dn	2/201	0.142369	0.534704	3.09909	6.04115	CBLN2;SNCA
GSE114192 Healthy-Diabetes Hs WholeBlood Dn	2/201	0.142369	0.534704	3.09909	6.04115	MUC1;HBD
GSE149662 IRMOE Mm Muscle Dn	2/202	0.143501	0.534704	3.08344	5.98622	MUC1;SCO2
GSE73036 FatDiet Day42 Mm Chip Muscle Dn	2/203	0.144635	0.534704	3.06794	5.93199	ITGAV;JPH1
GSE79164 erbAlpha-KO Mm Chip EpididymalWAT Dn	2/204	0.145771	0.534704	3.0526	5.87845	ACTA1;PDE4D
GSE146543 GlucInhib-Excit Mm HypothalNeur Dn	2/204	0.145771	0.534704	3.0526	5.87845	NAT1;AVIL
GSE155482 EndoC-bH1-vs-ECN90 Hs Islet Up	2/207	0.149189	0.534704	3.00747	5.72183	C1QTNF5;MAGEA6
GSE80780 Beta2-vs-Beta3 Hs Islet Up	2/208	0.150333	0.534704	2.99272	5.67092	ACTA1;PLA1A
GSE127251 Ucp1-KO 20DegC Mm InguinalWAT Dn	2/213	0.156075	0.534704	2.92106	5.42563	SCO2;PDE4D
GSE133903 Islets-vs-Pseduoislets Hs Islet Up	2/213	0.156075	0.534704	2.92106	5.42563	ACTA1;PTPRB
GSE142209 Microvessels-vs-Whole Hs Brain Up	2/214	0.157229	0.534704	2.90713	5.37835	HEYL;ID3
GSE149468 Fasting-8h Mm PosteriorSubcutWAT Dn	2/215	0.158384	0.534704	2.89334	5.33164	ACTA1;JPH1
GSE113764 White-vs-Brown Hs Adipose Up	2/216	0.159541	0.534704	2.87967	5.2855	ACTA1;JPH1
GSE73433 Ctrl-vs-Ctrl-shRNA Hs Islet Up	2/218	0.16186	0.534704	2.85272	5.19486	ACTA1;PTPRB
GSE73433 Ctrl-vs-ARX-shRNA Hs Islet Up	2/219	0.163022	0.534704	2.83943	5.15035	ACTA1;PTPRB
GSE137631 Obese-RYGB NoExercise Hs Muscle Up	2/221	0.16535	0.534704	2.81321	5.06291	RIPK2;TOMM40L
GSE137631 Lean-vs-Obese Hs Muscle Dn	2/222	0.166517	0.534704	2.80028	5.01995	PPIL1;SNCA
GSE110528 Vehicle-vs-T0901317 Mm Duodenum Up	2/228	0.173546	0.534704	2.72511	4.77252	CBLN2;SNCA
GSE131320 Ctrl-vs-IL-1OE 24Hr Hs Islet Dn	2/229	0.174722	0.534704	2.71297	4.73293	ICAM4;TNF
GSE136134 Ctrl-vs-Insulin 72Hrs Hs hiPSCs Dn	2/231	0.177079	0.534704	2.689	4.65509	ACTA1;CHRNA10
GSE73433 Ctrl-vs-Ctrl-shRNA Hs Islet Dn	2/235	0.181808	0.534704	2.6423	4.50461	HEYL;TNFRSF18
GSE154649 DOXY 8-5Hrs DUX4 Hs AMLCells Up	2/239	0.186556	0.534704	2.59718	4.36073	ID3;BCOR
GSE139932 Ctrl-vs-Cytokines Hs Islet Dn	1/72	0.212126	0.534704	4.30401	6.6737	C1QTNF5
GSE142025 AdvancedDiabetNephrop Hs Kidney Dn	1/83	0.240365	0.534704	3.72458	5.30975	TNFRSF18
GSE41203 NonObeseDiab 6Wks Mm Chip Islets Up	2/317	0.28134	0.534704	1.94633	2.46832	HSPA8;MSMO1
GSE70681 PtenDeletion 15Mnts Mm Chip Liver Up	1/120	0.328231	0.534704	2.56173	2.85387	NAT1
GSE46515 RictorFloxed Mm Chip Liver Dn	1/121	0.330461	0.534704	2.54026	2.81274	IFRD1
GSE26978 RIP-Cre Mm Chip Islets Dn	1/122	0.332684	0.534704	2.51914	2.77246	HSPA8
GSE149468 Fasting-12Hrs Mm PerigonadalWAT Dn	1/122	0.332684	0.534704	2.51914	2.77246	ICAM4
GSE115421 Rosiglitazone Scram Hs Adipocyte Up	1/123	0.3349	0.534704	2.49836	2.73302	FGF18
GSE143319 PrevsPostlbLoss Hs SubcuAdipose Dn	1/123	0.3349	0.534704	2.49836	2.73302	JPH1
GSE135448 Low-vs-HighProteinDiet Hs Liver Up	1/123	0.3349	0.534704	2.49836	2.73302	UBE2T
GSE107894 Metformin Visit2 Hs Adipose Dn	1/124	0.337108	0.534704	2.47792	2.69437	ACTA1
GSE152576 C2CD4B-KO Mm Islet Dn	1/128	0.34587	0.534704	2.39939	2.54742	CBLN2
GSE127251 Ucp1-KO 30C HFDiet Mm InguinalWAT Up	1/128	0.34587	0.534704	2.39939	2.54742	ANKDD1A
GSE153222 FatDiet 4Wks Mm Islet Dn	1/130	0.350208	0.534704	2.36196	2.47823	SCO2
GSE142025 EarlyDiabetNephropathy Hs Kidney Dn	1/132	0.354517	0.534704	2.32566	2.4117	ACTA1
GSE70681 PtenDel 3Months Mm Chip Liver Up	1/132	0.354517	0.534704	2.32566	2.4117	ACTA1
GSE156774 Plr-KO-BetaCells Mm Islet Up	1/133	0.356662	0.534704	2.30793	2.3794	FGF18
GSE123658 Type1Diabetes Hs WholeBlood Up	1/133	0.356662	0.534704	2.30793	2.3794	PLA1A
GSE120290 Aged24Months Mm Chip Muscle Dn	1/133	0.356662	0.534704	2.30793	2.3794	PDE4D
GSE149468 Fasting-2Hrs Mm OlfactoryBulb Up	1/133	0.356662	0.534704	2.30793	2.3794	MFRP
GSE149468 Fasting-18Hrs Mm OlfactoryBulb Dn	1/133	0.356662	0.534704	2.30793	2.3794	SCO2
GSE127056 FatDiet 4Wk Mm Chip Hypothalamus Up	1/134	0.358799	0.534704	2.29046	2.3477	MFRP
GSE107894 Metformin Visit1 Hs Adipose Dn	1/136	0.363052	0.534704	2.2563	2.2861	PLA1A
GSE120290 Young-Old Mm Chip Muscle-Quads Up	1/136	0.363052	0.534704	2.2563	2.2861	AVIL
GSE138252 Ctrl-vs-HeartFail Hs RightAtrium Dn	1/137	0.365169	0.534704	2.23959	2.25616	ACTA1
GSE149468 Fasting-12Hrs Mm OlfactoryBulb Up	1/137	0.365169	0.534704	2.23959	2.25616	FGF18
GSE149468 Fasting-2h Mm Poster-SubcutWAT Dn	1/138	0.367278	0.534704	2.22313	2.22677	ACTA1
GSE101657 ControlDiet-vs-FatDiet Mm Liver Up	1/138	0.367278	0.534704	2.22313	2.22677	ACTA1
GSE143735 Skin-FootUlcerHeal Hs DiabetFarm Up	1/140	0.371476	0.534704	2.19092	2.16961	UBE2T
GSE101657 ControlDiet-vs-FatDiet Mm Kidney Up	1/141	0.373565	0.534704	2.17516	2.14181	MFRP
GSE149468 Fasting-12Hrs Mm OlfactoryBulb Dn	1/142	0.375647	0.534704	2.15963	2.11451	ANKDD1A
GSE150679 CdCl2 PostnatalDay21 Mm Liver Up	1/143	0.377722	0.534704	2.14431	2.0877	JPH1
GSE106295 Mertk-KO Mm Heart Dn	1/145	0.381852	0.534704	2.11432	2.0355	SNCA
GSE107894 Metformin Visit2 Hs Muscle Dn	1/145	0.381852	0.534704	2.11432	2.0355	CBLN2
GSE127251 Ucp1-KO Fat 30C Mm InterscapBAT Dn	1/146	0.383907	0.534704	2.09963	2.01009	ACTA1
GSE149294 DOXY Hs GlutealAdipocytes Dn	1/147	0.385955	0.534704	2.08514	1.98513	ADAMTSL2
GSE107894 Metformin Visit1 Hs Muscle Dn	1/147	0.385955	0.534704	2.08514	1.98513	PLA1A
GSE120429 D316A Mm CDiet SubcutWAT Up	1/149	0.390031	0.534704	2.05676	1.9365	TNF
GSE157585 Metformin ResTrain16wk Hs Muscle Dn	1/150	0.392059	0.534704	2.04285	1.91281	CBLN2
GSE149294 DOXY tet-shCON GlutealAdipocytes Up	1/151	0.39408	0.534704	2.02913	1.88953	MAGEA6
GSE129369 adSMRT- - Mm Adipose Up	1/152	0.396095	0.534704	2.01559	1.86664	ACTA1
GSE149468 Fasting-22Hrs Mm Brain Dn	1/152	0.396095	0.534704	2.01559	1.86664	C1QTNF5
GSE151588 Ctrl-vs-SRI-37330 Hs Islet Dn	1/152	0.396095	0.534704	2.01559	1.86664	CBLN2
GSE149468 Fasting-12Hrs Mm Cerebellum Up	1/152	0.396095	0.534704	2.01559	1.86664	MUC1
GSE150679 CdCl2 F Postnatal 1D Mm Liver Dn	1/152	0.396095	0.534704	2.01559	1.86664	AVIL
GSE106148 Ctrl-vs-Type1Diabetes Hs Islet Dn	1/152	0.396095	0.534704	2.01559	1.86664	ID3
GSE153222 FatDiet 24Wks Mm Liver Up	1/154	0.400104	0.534704	1.98904	1.82202	SNCA
GSE101657 KetogenicDiet Mm Kidney Up	1/154	0.400104	0.534704	1.98904	1.82202	MFRP
GSE89035 Gcgr+ +-vs-Gcgr- - Mm Liver Up	1/155	0.402099	0.534704	1.97602	1.80027	AVIL
GSE155973 Macrophage-TSP1-ko Mm Liver Dn	1/155	0.402099	0.534704	1.97602	1.80027	TNFRSF18
GSE150679 CdCl2 F 42D Mm BulkRNAseq Liver Up	1/155	0.402099	0.534704	1.97602	1.80027	HSPA5
GSE153222 FatDiet 16Wks Mm Islet Dn	1/156	0.404088	0.534704	1.96318	1.77888	SNCA
GSE122348 REGN1193 FatDiet Mm Liver Dn	1/156	0.404088	0.534704	1.96318	1.77888	TRIM36
GSE149468 Fasting-18Hrs Mm Brainstem Dn	1/156	0.404088	0.534704	1.96318	1.77888	MFRP
GSE149294 DOXY tet-shCON Hs AbdomAdipocytes Up	1/156	0.404088	0.534704	1.96318	1.77888	CBLN2
GSE120429 D316ATrans ChowDiet Mm SubcutWAT Dn	1/157	0.40607	0.534704	1.95049	1.75784	NAT1
GSE101657 KetogenicDiet Mm Liver Up	1/157	0.40607	0.534704	1.95049	1.75784	ACTA1
GSE41203 ObeseDiabetic Mm Chip Islets Dn	1/157	0.40607	0.534704	1.95049	1.75784	TNFRSF18
GSE149468 Fasting-2Hrs Mm PerigonadalWAT Dn	1/157	0.40607	0.534704	1.95049	1.75784	ACTA1
GSE59143 PregnantIsletGraft Mm Chip Islets Dn	1/158	0.408045	0.534704	1.93797	1.73715	PTPRB
GSE149468 Fasting-8Hrs Mm Stomach Up	1/158	0.408045	0.534704	1.93797	1.73715	ACTA1
GSE128361 Idh2- -Knockout Male Mm Liver Dn	1/158	0.408045	0.534704	1.93797	1.73715	MUC1
GSE70681 PtenDeletion 3Mths Mm Chip Liver Dn	1/159	0.410014	0.534704	1.92561	1.7168	ANKDD1A
GSE153222 FatDiet 4Wks Mm Islet Up	1/159	0.410014	0.534704	1.92561	1.7168	ACTA1
GSE107894 Metformin Visit2 Hs Adipose Up	1/159	0.410014	0.534704	1.92561	1.7168	HBD
GSE127056 FatDiet4wks Mm Chip Hypothalamus Dn	1/160	0.411977	0.534704	1.9134	1.69678	ADARB1
GSE114192 IntermedHyperglycemia Romania Hs Blood Up	1/160	0.411977	0.534704	1.9134	1.69678	TRIM36
GSE149468 Fasting-18Hrs Mm Liver Up	1/161	0.413933	0.534704	1.90135	1.67708	MSMO1
GSE148997 PBS-vs-FGF19WT Mm Liver Up	1/162	0.415883	0.534704	1.88944	1.6577	ADAMTSL2
GSE149468 Fasting-22Hrs Mm Stomach Up	1/162	0.415883	0.534704	1.88944	1.6577	SCO2
GSE152576 C2CD4B-KO Mm Islet Up	1/163	0.417826	0.534704	1.87768	1.63863	TRIM36
GSE120290 Young-Old Mm Chip Liver Up	1/163	0.417826	0.534704	1.87768	1.63863	PDE4D
GSE101722 ML351ProinflamCytokine Mm Islet Dn	1/164	0.419763	0.534704	1.86607	1.61987	TNF
GSE86949 mutGCK(Y214C) Mm Islet Up	1/164	0.419763	0.534704	1.86607	1.61987	CBLN2
GSE106295 cTMs-Depleted Mm Heart Dn	1/164	0.419763	0.534704	1.86607	1.61987	AVIL
GSE150679 CdCl2 M 42D Mm BulkRNAseq Liver Up	1/164	0.419763	0.534704	1.86607	1.61987	HSPA8
GSE149294 DOXY tet-shRSPO3 Hs AbdomnAdipocyte Dn	1/166	0.423618	0.534704	1.84326	1.58322	FGF18
GSE87854 FatDiet Day14 Mm Chip Adipose Up	1/166	0.423618	0.534704	1.84326	1.58322	SNCA
GSE149294 Ctrl-vs-Dox Hs GlutealAdipocytes Dn	1/167	0.425536	0.534704	1.83207	1.56533	FGF18
GSE149468 Fasting-8Hrs Mm PerigonadalWAT Dn	1/167	0.425536	0.534704	1.83207	1.56533	ACTA1
GSE149468 Fasting-22Hrs Mm PerigonadalWAT Dn	1/167	0.425536	0.534704	1.83207	1.56533	ACTA1
GSE143735 Skin-FtUlcerNoHeal Hs DiabetFarm Up	1/168	0.427448	0.534704	1.821	1.54771	FGF18
GSE115421 Rosiglitazone shNF1 Hs Adipocyte Up	1/168	0.427448	0.534704	1.821	1.54771	MUC1
GSE101722 ProinflamCytokines Mm Islet Dn	1/168	0.427448	0.534704	1.821	1.54771	TNF
GSE149468 Fasting-22Hrs Mm Brainstem Dn	1/169	0.429353	0.534704	1.81007	1.53037	MFRP
GSE114192 IntermedHyperglycemia SouthAfrica Hs Blood Up	1/169	0.429353	0.534704	1.81007	1.53037	HEYL
GSE153222 FatDiet 4Wks Mm Liver Up	1/170	0.431252	0.534704	1.79927	1.5133	SNCA
GSE149468 Fasting-18Hrs Mm Cerebellum Dn	1/170	0.431252	0.534704	1.79927	1.5133	CBLN2
GSE41203 2Vs8Wk ObeseDiabetic Mm Chip Islets Up	1/170	0.431252	0.534704	1.79927	1.5133	PDE4D
GSE125856 NoCAD-vs-CAD Lean Hs Adipose Up	1/170	0.431252	0.534704	1.79927	1.5133	HBD
GSE48009 IRKO Mm Chip MammaryAlveolars Dn	1/170	0.431252	0.534704	1.79927	1.5133	MSMO1
GSE108971 Diabetic Hs EpicardialAdipose Up	1/170	0.431252	0.534704	1.79927	1.5133	CBLN2
GSE109285 PDX1 Mm 2CellTypes Up	1/171	0.433145	0.534704	1.7886	1.49649	HEYL
GSE127251 Ucp1-KO CDiet 30C Mm InterscaBAT Dn	1/171	0.433145	0.534704	1.7886	1.49649	TNFAIP2
GSE149468 Fasting-8Hrs Mm InterscapularBAT Up	1/171	0.433145	0.534704	1.7886	1.49649	TRIM36
GSE149468 Fasting-12Hrs Mm Stomach Dn	1/171	0.433145	0.534704	1.7886	1.49649	ADAMTSL2
GSE40439 Wt-Vs-Ctrl Mm Chip Muscle Up	1/171	0.433145	0.534704	1.7886	1.49649	SCO2
GSE101657 Ctrl-KetogenicDiet Mm Kidney Dn	1/172	0.435032	0.534704	1.77805	1.47993	FGF18
GSE41203 ObeseDiabet 6Wks Mm Chip Islets Dn	1/172	0.435032	0.534704	1.77805	1.47993	TNFRSF18
GSE149468 Fasting-18Hrs Mm Stomach Up	1/173	0.436912	0.534704	1.76762	1.46363	SCO2
GSE46515 RictorFloxed Mm Chip Liver Up	1/173	0.436912	0.534704	1.76762	1.46363	MUC1
GSE107894 Metformin Visit1 Hs Muscle Up	1/174	0.438787	0.534704	1.75731	1.44757	TNF
GSE101657 ControlDiet-vs-FatDiet Mm Kidney Dn	1/175	0.440655	0.534704	1.74713	1.43176	FGF18
GSE127056 FatDiet 8Wk Mm Chip Hypothalamus Up	1/175	0.440655	0.534704	1.74713	1.43176	ADARB1
GSE149468 Fasting-2Hrs Mm Stomach Dn	1/175	0.440655	0.534704	1.74713	1.43176	MFRP
GSE158359 Vehicle-vs-FGF19 Mm Liver Up	1/175	0.440655	0.534704	1.74713	1.43176	C1QTNF5
GSE112213 M-LXROE-S196A-LdlrKO Mm Macroph Dn	1/175	0.440655	0.534704	1.74713	1.43176	ACTA1
GSE153222 FatDiet 4Wks Mm Liver Dn	1/176	0.442517	0.534704	1.73705	1.41618	FGF18
GSE155612 Mettl3 flox-OE-Mettl3KO Mm Islet Up	1/176	0.442517	0.534704	1.73705	1.41618	UBE2T
GSE80780 Beta1-vs-Beta2 Hs Islet Up	1/176	0.442517	0.534704	1.73705	1.41618	CBLN2
GSE149468 Fasting-22Hrs Mm Brain Up	1/176	0.442517	0.534704	1.73705	1.41618	MFRP
GSE40439 NCoR1-MKO Mm Chip Muscle Dn	1/176	0.442517	0.534704	1.73705	1.41618	AVIL
GSE140953 AhsgKnockout Mm Chip BAT Dn	1/176	0.442517	0.534704	1.73705	1.41618	ACTA1
GSE39752 StreptozotocinSTZ Mm Chip Liver Dn	1/176	0.442517	0.534704	1.73705	1.41618	ID3
GSE89035 PBS-Gcgr-mAb BothGcgr+ + Mm Liver Dn	1/177	0.444373	0.534704	1.7271	1.40083	MSMO1
GSE26978 Men1flf-RIP-Cre Mm Chip Islets Dn	1/178	0.446223	0.534704	1.71725	1.38571	HSPA8
GSE153222 FatDiet 8Wks Mm Liver Dn	1/179	0.448067	0.534704	1.70752	1.37082	TNF
GSE127056 FatDiet8Wks Mm Chip Hypothalamus Dn	1/179	0.448067	0.534704	1.70752	1.37082	HSPA5
GSE40439 NCoR1-MKO Mm Chip Muscle Up	1/179	0.448067	0.534704	1.70752	1.37082	SCO2
GSE149468 Fasting-12Hrs Mm Cerebellum Dn	1/179	0.448067	0.534704	1.70752	1.37082	CBLN2
GSE144061 FGF6 4Hrs Mm BrownPreadipocytes Up	1/179	0.448067	0.534704	1.70752	1.37082	ID3
GSE149662 IRMOE Mm Muscle Up	1/180	0.449905	0.534704	1.69789	1.35614	ADAM23
GSE106295 cTMs-Depleted Mm Heart Up	1/180	0.449905	0.534704	1.69789	1.35614	TNF
GSE47504 Pdx-1pos - Mm Chip Islets Dn	1/180	0.449905	0.534704	1.69789	1.35614	MUC1
GSE131320 BacteroidesDorei 24Hr Hs Islet Up	1/180	0.449905	0.534704	1.69789	1.35614	MFRP
GSE157585 Metformin NoResisTrain Hs Muscle Up	1/181	0.451737	0.534704	1.68838	1.34168	TNFRSF18
GSE149468 Fasting-8Hrs Mm Liver Up	1/181	0.451737	0.534704	1.68838	1.34168	ACTA1
GSE149468 Fasting-8Hrs Mm Brainstem Up	1/181	0.451737	0.534704	1.68838	1.34168	MFRP
GSE120429 D316A-Transgen Fat Mm SubcutWAT Dn	1/181	0.451737	0.534704	1.68838	1.34168	ACTA1
GSE149468 Fasting-8Hrs Mm Liver Dn	1/182	0.453563	0.534704	1.67896	1.32743	HEYL
GSE155973 Wt-MacrophTSP1KO LFDiet Mm Liver Dn	1/182	0.453563	0.534704	1.67896	1.32743	TNF
GSE153222 FatDiet 16Wks Mm Liver Up	1/182	0.453563	0.534704	1.67896	1.32743	JPH1
GSE149468 Fasting-18Hrs Mm Stomach Dn	1/183	0.455382	0.534704	1.66965	1.31338	ADAMTSL2
GSE156903 Vehicle-vs-Tacrolimus Hs Islet Up	1/183	0.455382	0.534704	1.66965	1.31338	ACTA1
GSE154198 Passage58 Hs Chip Hepatocyte Dn	1/184	0.457196	0.534704	1.66045	1.29954	SNCA
GSE135445 AtrialFib Hs EpicardialAdipose Up	1/184	0.457196	0.534704	1.66045	1.29954	ACTA1
GSE67543 Fetal-vs-Adult BetaCells Hs Islet Dn	1/185	0.459004	0.534704	1.65134	1.28589	PLA1A
GSE80780 Beta1-vs-Beta3 Hs Islet Dn	1/185	0.459004	0.534704	1.65134	1.28589	HEYL
GSE158359 Vehicle-vs-FGF19 Mm Liver Dn	1/185	0.459004	0.534704	1.65134	1.28589	HSPA5
GSE149468 Fasting-12Hrs Mm InterscapBAT Up	1/185	0.459004	0.534704	1.65134	1.28589	PTPRB
GSE112213 M-LXROE-S196A-LdlrKO Mm Macroph Up	1/185	0.459004	0.534704	1.65134	1.28589	FGF18
GSE149468 Fasting-2Hrs Mm Liver Dn	1/186	0.460806	0.534704	1.64233	1.27244	HEYL
GSE40439 wt-vs-PGC1Tg Mm Chip Muscle Up	1/186	0.460806	0.534704	1.64233	1.27244	PDE4D
GSE110569 wt-vs-SREBP-1 Mm Chip Liver Up	1/186	0.460806	0.534704	1.64233	1.27244	NOP56
GSE144061 FGF6 8Hrs Mm BrownPreadipocytes Up	1/186	0.460806	0.534704	1.64233	1.27244	ID3
GSE149468 Fasting-2Hrs Mm InterscapularBAT Up	1/187	0.462602	0.534704	1.63342	1.25918	FGF18
GSE43106 FatDiet C57BL 6J Mm Chip Liver Dn	1/187	0.462602	0.534704	1.63342	1.25918	RIPK2
GSE149468 Fasting-22Hrs Mm PerigonadalWAT Up	1/187	0.462602	0.534704	1.63342	1.25918	MFRP
GSE84759 Isl1-KO Mm BetaCells Up	1/188	0.464392	0.534704	1.6246	1.24611	JPH1
GSE80780 Beta2-vs-Beta4 Hs Islet Up	1/188	0.464392	0.534704	1.6246	1.24611	ACTA1
GSE149468 Fasting-22Hrs Mm Stomach Dn	1/188	0.464392	0.534704	1.6246	1.24611	ADAMTSL2
GSE137678 Stat5-Adipoq Mm BAT Dn	1/189	0.466176	0.534704	1.61588	1.23322	ICAM4
GSE148997 PBS-vs-FGF19 KLB Mm Liver Dn	1/189	0.466176	0.534704	1.61588	1.23322	SNCA
GSE150679 CdCl2 F Postnatal 42D Mm Liver Dn	1/189	0.466176	0.534704	1.61588	1.23322	ACTA1
GSE73436 HomozygousAMPK-R299Q-KI Mm Brain Dn	1/189	0.466176	0.534704	1.61588	1.23322	SNCA
GSE101657 ControlDiet-vs-FatDiet Mm Liver Dn	1/189	0.466176	0.534704	1.61588	1.23322	MUC1
GSE101537 CBP-KO Mm Islet Dn	1/191	0.469727	0.534704	1.5987	1.20799	SCO2
GSE86611 GFP-vs-ASF1B Hs Islet Dn	1/191	0.469727	0.534704	1.5987	1.20799	ACTA1
GSE153222 FatDiet 8Wks Mm Islet Up	1/191	0.469727	0.534704	1.5987	1.20799	FGF18
GSE149468 Fasting-18Hrs Mm Liver Dn	1/191	0.469727	0.534704	1.5987	1.20799	HEYL
GSE101722 Vehicle-vs-ML351 Mm Islet Up	1/191	0.469727	0.534704	1.5987	1.20799	TRIM36
GSE41203 NonObeseDiab 2Wks Mm Chip Islets Dn	1/191	0.469727	0.534704	1.5987	1.20799	TNF
GSE137678 Stat5-Adipoq Mm BAT Up	1/192	0.471494	0.534704	1.59025	1.19563	ACTA1
GSE142209 Microvessels-vs-Whole Mm Brain Dn	1/192	0.471494	0.534704	1.59025	1.19563	SCO2
GSE149468 Fasting-12Hrs Mm PerigonadalWAT Up	1/192	0.471494	0.534704	1.59025	1.19563	MFRP
GSE124774 LPS+IFNy Diabet Mm BMDMs-Macroph Dn	1/193	0.473255	0.534704	1.58189	1.18345	PLA1A
GSE149468 Fasting-2Hrs Mm InterscapularBAT Dn	1/193	0.473255	0.534704	1.58189	1.18345	ACTA1
GSE127251 Ucp1-KO Ctrl 20C Mm InterscapBAT Dn	1/193	0.473255	0.534704	1.58189	1.18345	SNCA
GSE41203 2Vs12Wk NonObeseDiab Mm Chip Islets Up	1/193	0.473255	0.534704	1.58189	1.18345	PDE4D
GSE101537 CBP-KO Mm Islet Up	1/194	0.47501	0.534704	1.57361	1.17143	PLA1A
GSE149468 Fasting-2Hrs Mm Liver Up	1/194	0.47501	0.534704	1.57361	1.17143	ACTA1
GSE67991 Ffar3-Ffar3-KO Mm Islet Up	1/194	0.47501	0.534704	1.57361	1.17143	TNF
GSE134068 HighQual-vs-MedQual Hs Islet Dn	1/194	0.47501	0.534704	1.57361	1.17143	MFRP
GSE136134 Ctrl-vs-Insulin 24Hrs Hs hiPSCs Up	1/194	0.47501	0.534704	1.57361	1.17143	MFRP
GSE134068 HighQual-vs-LowQual Hs Islet Dn	1/195	0.47676	0.534704	1.56542	1.15958	MFRP
GSE100067 IsletMacroph-Pancreat-Dendrit Mm Dn	1/197	0.480241	0.534704	1.54929	1.13635	ADAM23
GSE146543 GlucoseExcitedNeurons Mm Neurons Up	1/197	0.480241	0.534704	1.54929	1.13635	BCL2L12
GSE80780 Beta1-vs-Beta4 Hs Islet Dn	1/197	0.480241	0.534704	1.54929	1.13635	NAT1
GSE149468 Fasting-8Hrs Mm PerigonadalWAT Up	1/197	0.480241	0.534704	1.54929	1.13635	MFRP
GSE134431 SkinvsUlcer-NoHeal Hs DiabetFoot Dn	1/198	0.481974	0.534704	1.54135	1.12498	ADAM23
GSE154198 Passage22 Hs Chip Hepatocyte Dn	1/198	0.481974	0.534704	1.54135	1.12498	GYG1
GSE109285 Mature-OE-vs-OE-ExpressPDX1 Mm Dn	1/198	0.481974	0.534704	1.54135	1.12498	SNCA
GSE127251 Ucp1-KO 20DegC Mm InterscapBAT Up	1/198	0.481974	0.534704	1.54135	1.12498	NAT1
GSE127251 Ucp1-KO CDIET 30C Mm InterscapBAT Up	1/198	0.481974	0.534704	1.54135	1.12498	NAT1
GSE125856 Epicardial-vs-Subcut Hs Adipose Dn	1/198	0.481974	0.534704	1.54135	1.12498	HBD
GSE149468 Fasting-18Hrs Mm PerigonadalWAT Up	1/198	0.481974	0.534704	1.54135	1.12498	MFRP
GSE80780 Beta3-vs-Beta4 Hs Islet Up	1/199	0.4837	0.534704	1.53349	1.11376	TOMM40L
GSE108413 Ctrl-vs-Cytokines Hs Islet Up	1/199	0.4837	0.534704	1.53349	1.11376	PTPRB
GSE124774 LPS+IFNy Mm BMDMs-Macrophages Dn	1/199	0.4837	0.534704	1.53349	1.11376	PLA1A
GSE101657 KetogenicDiet Mm Liver Dn	1/200	0.485421	0.534704	1.52571	1.10269	MUC1
GSE154198 Passage1 Hs Chip Hepatocyte Up	1/200	0.485421	0.534704	1.52571	1.10269	PLA1A
GSE120429 D316A Mm HFDiet SubcutWAT Up	1/201	0.487136	0.534704	1.518	1.09176	MFRP
GSE100067 IsletMacrophs-B6.g7 Mm Macroph Dn	1/201	0.487136	0.534704	1.518	1.09176	ACTA1
GSE127251 Ucp1-KO 30DegC Mm InguinalWAT Dn	1/202	0.488846	0.534704	1.51037	1.08098	SCO2
GSE149468 Fasting-22Hrs Mm InterscapBAT Up	1/202	0.488846	0.534704	1.51037	1.08098	ACVR1B
GSE142209 Microves-vs-WholeBr Mm 2Tissues Up	1/202	0.488846	0.534704	1.51037	1.08098	PLA1A
GSE138252 NoAtrialFib-AtrialFib Hs LAtrium Up	1/204	0.492249	0.534704	1.49534	1.05985	ACTA1
GSE138252 NoFib-vs-AtrialFib Hs RAtrium Up	1/204	0.492249	0.534704	1.49534	1.05985	ID3
GSE154198 Passage113 Hs Chip Hepatocyte Up	1/204	0.492249	0.534704	1.49534	1.05985	ID3
GSE127251 Ucp1-KO HFDiet 30C Mm InterscapBAT Up	1/204	0.492249	0.534704	1.49534	1.05985	NAT1
GSE135391 RoomTemp-vs-Cold Old Mm BAT Up	1/207	0.49731	0.534704	1.47334	1.02919	MUC1
GSE142209 Microvessels-vs-Whole Hs Brain Dn	1/207	0.49731	0.534704	1.47334	1.02919	TCTN3
GSE136134 Ctrl-vs-Insulin 72Hrs Hs hiPSCs Up	1/207	0.49731	0.534704	1.47334	1.02919	MUC1
GSE135391 Cold Young Mm BAT Up	1/208	0.498987	0.534704	1.46615	1.01923	NAT1
GSE154198 Passage22 Hs Chip Hepatocyte Up	1/209	0.500657	0.534704	1.45902	1.0094	ID3
GSE137631 Obese-RYGB NoExercise Hs Muscle Dn	1/209	0.500657	0.534704	1.45902	1.0094	HBD
GSE124621 PGRMC2-AdiposeTissueKO Mm BAT Dn	1/210	0.502323	0.534704	1.45197	0.999699	ACTA1
GSE144061 VFGF6 8Hrs Mm BrownPreadipocytes Dn	1/211	0.503982	0.534704	1.44498	0.990122	FGF18
GSE134431 SkinvsUlcerHealer Hs DiabetFoot Dn	1/211	0.503982	0.534704	1.44498	0.990122	ADAM23
GSE149468 Fasting-12Hrs Mm Liver Dn	1/214	0.508929	0.534704	1.42441	0.962115	ACTA1
GSE125856 EpicardvsMediastinal Hs Adipose Dn	1/214	0.508929	0.534704	1.42441	0.962115	HBD
GSE156067 PCOS Day7 Hs SubcutaneousAdipose Up	1/215	0.510567	0.534704	1.41769	0.953015	ID3
GSE137136 ProInflamCytokine Hs EndoC-OE-H1 Up	1/216	0.5122	0.534704	1.41102	0.94403	CBLN2
GSE149468 Fasting-18Hrs Mm Brain Up	1/217	0.513827	0.534704	1.40442	0.935157	MFRP
GSE44035 Male-vs-Female NoDiabet Hs Islets Dn	1/218	0.515449	0.534704	1.39787	0.926394	ADAMTSL2
GSE137631 Obese-RYGB Exercise Hs Muscle Up	1/218	0.515449	0.534704	1.39787	0.926394	SNCA
GSE37248 hFXRBat-AdiposehsFXR Mm Chip BAT Dn	1/221	0.520283	0.534704	1.3786	0.900754	ACTA1
GSE108654 Islets-vs-hESC-OE-likeCells Hs Dn	1/221	0.520283	0.534704	1.3786	0.900754	CBLN2
GSE120299 Alpha-vs-BetaCells Hs Islet Up	1/223	0.523479	0.534704	1.36604	0.884182	ITPR1
GSE149468 Fasting-8Hrs Mm InterscapularBAT Dn	1/224	0.525069	0.534704	1.35985	0.876048	ACTA1
GSE70681 PtenDeletion 15Mnts Mm Chip Liver Dn	1/224	0.525069	0.534704	1.35985	0.876048	MUC1
GSE157585 ResistTrain Placebo Hs Muscle Dn	1/224	0.525069	0.534704	1.35985	0.876048	TNF
GSE157585 ResistTrain Metformin Hs Muscle Dn	1/224	0.525069	0.534704	1.35985	0.876048	TNFRSF18
GSE144061 FGF6 4Hrs Mm BrownPreadipocytes Dn	1/224	0.525069	0.534704	1.35985	0.876048	FGF18
GSE144274 Healthy-vs-IPAH Hs Muscle Up	1/226	0.528234	0.536209	1.34762	0.860074	PTPRB
GSE144441 T2Diabetes Hs RNAseq Skin Dn	1/227	0.529809	0.536209	1.34159	0.852232	FMNL3
GSE154649 DOXY 4-5Hrs DUX4 Hs AMLCells Up	1/228	0.531378	0.536209	1.33562	0.844484	ID3
GSE73433 Ctrl-vs-ARX-shRNA Hs Islet Dn	1/234	0.540687	0.543854	1.30083	0.799896	HEYL
GSE149468 Fasting-8Hrs Mm Brain Up	1/235	0.542221	0.543854	1.2952	0.792769	ACVR1B
GSE108654 Islets-vs-hESC-OE Hs Islets Up	1/238	0.546792	0.546792	1.27861	0.771881	ADAMTSL2
