# Supplementary material for: Transcriptome of Subcutaneous Adipose Tissue reflect Membrane Dysfunction and Impaired Oxidative Processes in T2D across Heterogenous Populations
Source: Research Square preprint supplement (doi:10.21203/rs.3.rs-7053974/v1), 2025-11-14
Supplement: Supplementary file 7 [file 9c4d1e2193b99797fa89bb11.xlsx]

## Sheet: Gene names and Protein names
	Gene symbols	Association ID	Ensemble ID	Protein names
	ABCB7	ILMN_1687840	ENSG00000131269	ATP binding cassette subfamily B member 7
	ABCC10	ILMN_1776119	ENSG00000124574	ATP binding cassette subfamily C member 10
	ABCC5	ILMN_2302358	ENSG00000114770	ATP binding cassette subfamily C member 5
	ABCC9	ILMN_1751453	ENSG00000069431	ATP binding cassette subfamily C member 9
	ABCC9	ILMN_2366473	ENSG00000069431	ATP binding cassette subfamily C member 9
	ABCF2-H2BK1	ILMN_2284941	ENSG00000285292	ABCF2-H2BK1 readthrough
	ABHD12	ILMN_2318685	ENSG00000100997	abhydrolase domain containing 12, lysophospholipase
	ABHD17B	ILMN_1785661	ENSG00000107362	abhydrolase domain containing 17B, depalmitoylase
	ABHD5	ILMN_1655702	ENSG00000011198	abhydrolase domain containing 5, lysophosphatidic acid acyltransferase
	ACAT1	ILMN_1800008	ENSG00000075239	acetyl-CoA acetyltransferase 1
	ACOX1	ILMN_1750158	ENSG00000161533	acyl-CoA oxidase 1
	ACOX1	ILMN_1765767	ENSG00000161533	acyl-CoA oxidase 1
	ACSBG1	ILMN_2227011	ENSG00000103740	acyl-CoA synthetase bubblegum family member 1
	ACSF3	ILMN_1716832	ENSG00000176715	acyl-CoA synthetase family member 3
	ACSL3	ILMN_1654414	ENSG00000123983	acyl-CoA synthetase long chain family member 3
	ACSL4	ILMN_1683598	ENSG00000068366	acyl-CoA synthetase long chain family member 4
	ACSL4	ILMN_1691714	ENSG00000068366	acyl-CoA synthetase long chain family member 4
	ACSM2B	ILMN_1765912	ENSG00000066813	acyl-CoA synthetase medium chain family member 2B
	ACSS2	ILMN_2336595	ENSG00000131069	acyl-CoA synthetase short chain family member 2
	ACTN2	ILMN_1654422	ENSG00000077522	actinin alpha 2
	ACVR1C	ILMN_1689217	ENSG00000123612	activin A receptor type 1C
	ADAMTSL1	ILMN_1706992	ENSG00000178031	ADAMTS like 1
	ADGRG1	ILMN_1697228	ENSG00000205336	adhesion G protein-coupled receptor G1
	ADH5	ILMN_1738604	ENSG00000197894	alcohol dehydrogenase 5 (class III), chi polypeptide
	ADHFE1	ILMN_2363634	ENSG00000147576	alcohol dehydrogenase iron containing 1
	ADK	ILMN_1801020	ENSG00000156110	adenosine kinase
	ADK	ILMN_2358628	ENSG00000156110	adenosine kinase
	ADPGK	ILMN_1793959	ENSG00000159322	ADP dependent glucokinase
	AGFG1	ILMN_2196734	ENSG00000173744	ArfGAP with FG repeats 1
	AGO3	ILMN_1761049	ENSG00000126070	argonaute RISC catalytic component 3
	AGXT	ILMN_1709796	ENSG00000172482	alanine--glyoxylate aminotransferase
	AIG1	ILMN_1797974	ENSG00000146416	androgen induced 1
	AKAP12	ILMN_1686846	ENSG00000131016	A-kinase anchoring protein 12
	AKAP12	ILMN_2308950	ENSG00000131016	A-kinase anchoring protein 12
	AKAP9	ILMN_2400663	ENSG00000127914	A-kinase anchoring protein 9
	ALDH1A1	ILMN_2096372	ENSG00000165092	aldehyde dehydrogenase 1 family member A1
	ALDH2	ILMN_1793859	ENSG00000111275	aldehyde dehydrogenase 2 family member
	ALDH4A1	ILMN_2406557	ENSG00000159423	aldehyde dehydrogenase 4 family member A1
	ALDH4A1	ILMN_1656368	ENSG00000159423	aldehyde dehydrogenase 4 family member A1
	ALDH4A1	ILMN_2244841	ENSG00000159423	aldehyde dehydrogenase 4 family member A1
	ANG	ILMN_2294978	ENSG00000214274	angiogenin
	ANG	ILMN_2408572	ENSG00000214274	angiogenin
	ANGPTL6	ILMN_1725518	ENSG00000130812	angiopoietin like 6
	ANK2	ILMN_1652729	ENSG00000145362	ankyrin 2
	ANK3	ILMN_2390609	ENSG00000151150	ankyrin 3
	ANKEF1	ILMN_1728957	ENSG00000132623	ankyrin repeat and EF-hand domain containing 1
	ANKRD17	ILMN_2406335	ENSG00000132466	ankyrin repeat domain 17
	ANO5	ILMN_1690154	ENSG00000171714	anoctamin 5
	ANO6	ILMN_1674941	ENSG00000177119	anoctamin 6
	ANO8	ILMN_1709124	ENSG00000074855	anoctamin 8
	ANTXR2	ILMN_1812926	ENSG00000163297	ANTXR cell adhesion molecule 2
	ANXA1	ILMN_2184184	ENSG00000135046	annexin A1
	ANXA2	ILMN_1711899	ENSG00000182718	annexin A2
	ANXA6	ILMN_1678612	ENSG00000197043	annexin A6
	AOC1	ILMN_1731433	ENSG00000002726	amine oxidase copper containing 1
	AP3D1	ILMN_2284667	ENSG00000065000	adaptor related protein complex 3 subunit delta 1
	APMAP	ILMN_1674394	ENSG00000101474	adipocyte plasma membrane associated protein
	APOBEC3F	ILMN_1710726	ENSG00000128394	apolipoprotein B mRNA editing enzyme catalytic subunit 3F
	APOL6	ILMN_1687201	ENSG00000221963	apolipoprotein L6
	APPL1	ILMN_1763730	ENSG00000157500	adaptor protein, phosphotyrosine interacting with PH domain and leucine zipper 1
	AQP7	ILMN_1738494	ENSG00000165269	aquaporin 7
	ARF1	ILMN_2330948	ENSG00000143761	ADP ribosylation factor 1
	ARHGAP10	ILMN_1736112	ENSG00000071205	Rho GTPase activating protein 10
	ARHGAP21	ILMN_1811592	ENSG00000107863	Rho GTPase activating protein 21
	ARHGAP24	ILMN_1801833	ENSG00000138639	Rho GTPase activating protein 24
	ARHGAP24	ILMN_1765876	ENSG00000138639	Rho GTPase activating protein 24
	ARHGAP42	ILMN_1730516	ENSG00000165895	Rho GTPase activating protein 42
	ARHGAP6	ILMN_1732641	ENSG00000047648	Rho GTPase activating protein 6
	ARHGEF15	ILMN_1792571	ENSG00000198844	Rho guanine nucleotide exchange factor 15
	ARIH1	ILMN_1694219	ENSG00000166233	ariadne RBR E3 ubiquitin protein ligase 1
	ARK2N	ILMN_1801822	ENSG00000152242	arkadia (RNF111) N-terminal like PKA signaling regulator 2N
	ARMC9	ILMN_1755732	ENSG00000135931	armadillo repeat containing 9
	ARPP19	ILMN_2059505	ENSG00000128989	cAMP regulated phosphoprotein 19
	ARSA	ILMN_2047240	ENSG00000100299	arylsulfatase A
	ARSB	ILMN_1668727	ENSG00000113273	arylsulfatase B
	ARSG	ILMN_1720604	ENSG00000141337	arylsulfatase G
	AS3MT	ILMN_1771732	ENSG00000214435	arsenite methyltransferase
	ASAH1	ILMN_1684054	ENSG00000104763	N-acylsphingosine amidohydrolase 1
	ASB10	ILMN_1781148	ENSG00000146926	ankyrin repeat and SOCS box containing 10
	ASPH	ILMN_1739719	ENSG00000198363	aspartate beta-hydroxylase
	ATE1	ILMN_1756867	ENSG00000107669	arginyltransferase 1
	ATE1	ILMN_2381769	ENSG00000107669	arginyltransferase 1
	ATF2	ILMN_1748271	ENSG00000115966	activating transcription factor 2
	ATP5MF	ILMN_2307883	ENSG00000241468	ATP synthase membrane subunit f
	ATP6V1F	ILMN_2099783	ENSG00000128524	ATPase H+ transporting V1 subunit F
	ATP7B	ILMN_1696223	ENSG00000123191	ATPase copper transporting beta
	ATP9B	ILMN_1658684	ENSG00000166377	ATPase phospholipid transporting 9B (putative)
	ATPAF1	ILMN_1790603	ENSG00000123472	ATP synthase mitochondrial F1 complex assembly factor 1
	ATRIP	ILMN_1653896	ENSG00000164053	ATR interacting protein
	AURKC	ILMN_2350296	ENSG00000105146	aurora kinase C
	AXDND1	ILMN_1684246	ENSG00000162779	axonemal dynein light chain domain containing 1
	B3GNT8	ILMN_1741389	ENSG00000177191	UDP-GlcNAc:betaGal beta-1,3-N-acetylglucosaminyltransferase 8
	B4GALT6	ILMN_1732555	ENSG00000118276	beta-1,4-galactosyltransferase 6
	BAG4	ILMN_2221014	ENSG00000156735	BAG cochaperone 4
	BAIAP2	ILMN_1699727	ENSG00000175866	BAR/IMD domain containing adaptor protein 2
	BCAP31	ILMN_1812403	ENSG00000185825	B cell receptor associated protein 31
	BCAS1	ILMN_1733042	ENSG00000064787	brain enriched myelin associated protein 1
	BCL2L1	ILMN_1742410	ENSG00000171552	BCL2 like 1
	BCL6	ILMN_1737314	ENSG00000113916	BCL6 transcription repressor
	BDH1	ILMN_1799280	ENSG00000161267	3-hydroxybutyrate dehydrogenase 1
	BDNF	ILMN_1706644	ENSG00000176697	brain derived neurotrophic factor
	BEND4	ILMN_1740094	ENSG00000188848	BEN domain containing 4
	BEX3	ILMN_1729208	ENSG00000166681	brain expressed X-linked 3
	BFAR	ILMN_1814808	ENSG00000103429	bifunctional apoptosis regulator
	BORCS5	ILMN_1651268	ENSG00000165714	BLOC-1 related complex subunit 5
	BORCS7-ASMT	ILMN_1771732	ENSG00000270316	BORCS7-ASMT readthrough (NMD candidate)
	BPNT2	ILMN_1696311	ENSG00000104331	3'(2'), 5'-bisphosphate nucleotidase 2
	BRAT1	ILMN_1804498	ENSG00000106009	BRCA1 associated ATM activator 1
	BRCA1	ILMN_1771065	ENSG00000012048	BRCA1 DNA repair associated
	BRDT	ILMN_1667928	ENSG00000137948	bromodomain testis associated
	BRI3BP	ILMN_1797693	ENSG00000184992	BRI3 binding protein
	BRINP3	ILMN_2092589	ENSG00000162670	BMP/retinoic acid inducible neural specific 3
	BSDC1	ILMN_1734483	ENSG00000160058	BSD domain containing 1
	BSND	ILMN_1726420	ENSG00000162399	barttin CLCNK type accessory subunit beta
	BTBD1	ILMN_1691927	ENSG00000064726	BTB domain containing 1
	BUD13	ILMN_1749210	ENSG00000137656	BUD13 homolog
	C19orf12	ILMN_1664920	ENSG00000131943	chromosome 19 open reading frame 12
	C1QTNF8	ILMN_1695740	ENSG00000184471	C1q and TNF related 8
	C2orf49	ILMN_1701131	ENSG00000135974	chromosome 2 open reading frame 49
	C3orf22	ILMN_1653228	ENSG00000180697	chromosome 3 open reading frame 22
	C3orf38	ILMN_2078264	ENSG00000179021	chromosome 3 open reading frame 38
	C4orf19	ILMN_1795838	ENSG00000154274	chromosome 4 open reading frame 19
	C9orf72	ILMN_1666742	ENSG00000147894	C9orf72-SMCR8 complex subunit
	CACNA1G	ILMN_2304659	ENSG00000006283	calcium voltage-gated channel subunit alpha1 G
	CACNG4	ILMN_1702149	ENSG00000075461	calcium voltage-gated channel auxiliary subunit gamma 4
	CACNG6	ILMN_2356441	ENSG00000130433	calcium voltage-gated channel auxiliary subunit gamma 6
	CACNG8	ILMN_2106874	ENSG00000142408	calcium voltage-gated channel auxiliary subunit gamma 8
	CALML3	ILMN_1733333	ENSG00000178363	calmodulin like 3
	CAPN7	ILMN_2117642	ENSG00000131375	calpain 7
	CAPRIN1	ILMN_1782897	ENSG00000135387	cell cycle associated protein 1
	CAPSL	ILMN_2359306	ENSG00000152611	calcyphosine like
	CARTPT	ILMN_1702296	ENSG00000164326	CART prepropeptide
	CASP4	ILMN_1778059	ENSG00000196954	caspase 4
	CASZ1	ILMN_1655191	ENSG00000130940	castor zinc finger 1
	CAT	ILMN_2151739	ENSG00000121691	catalase
	CATSPERE	ILMN_1792088	ENSG00000179397	catsper channel auxiliary subunit epsilon
	CBARP	ILMN_1780504	ENSG00000099625	CACN subunit beta associated regulatory protein
	CBFB	ILMN_1766408	ENSG00000067955	core-binding factor subunit beta
	CBLC	ILMN_1811729	ENSG00000142273	Cbl proto-oncogene C
	CBR1	ILMN_1809003	ENSG00000159228	carbonyl reductase 1
	CCDC113	ILMN_1775520	ENSG00000103021	coiled-coil domain containing 113
	CCDC13	ILMN_2174875	ENSG00000244607	coiled-coil domain containing 13
	CCDC142	ILMN_1813682	ENSG00000135637	coiled-coil domain containing 142
	CCDC180	ILMN_1793347	ENSG00000197816	coiled-coil domain containing 180
	CCDC186	ILMN_1734010	ENSG00000165813	coiled-coil domain containing 186
	CCDC51	ILMN_1799579	ENSG00000164051	coiled-coil domain containing 51
	CCDC61	ILMN_2210298	ENSG00000104983	coiled-coil domain containing 61
	CCDC62	ILMN_1663370	ENSG00000130783	coiled-coil domain containing 62
	CCDC73	ILMN_1730745	ENSG00000186714	coiled-coil domain containing 73
	CCER1	ILMN_1758537	ENSG00000197651	coiled-coil glutamate rich protein 1
	CCL18	ILMN_1654411	ENSG00000275385	C-C motif chemokine ligand 18
	CCNC	ILMN_1676423	ENSG00000112237	cyclin C
	CCNC	ILMN_1798705	ENSG00000112237	cyclin C
	CCNE1	ILMN_2374425	ENSG00000105173	cyclin E1
	CCT6P1	ILMN_1681160	ENSG00000228409	chaperonin containing TCP1 subunit 6 pseudogene 1
	CCT7	ILMN_1662954	ENSG00000135624	chaperonin containing TCP1 subunit 7
	CD164	ILMN_1783852	ENSG00000135535	CD164 molecule
	CD302	ILMN_2070940	ENSG00000241399	CD302 molecule
	CD8B	ILMN_1669005	ENSG00000172116	CD8 subunit beta
	CD99	ILMN_2056032	ENSG00000002586	CD99 molecule (Xg blood group)
	CD99	ILMN_2056032	ENSG00000292348	CD99 molecule (Xg blood group)
	CDC25A	ILMN_1733396	ENSG00000164045	cell division cycle 25A
	CDC42	ILMN_1675156	ENSG00000070831	cell division cycle 42
	CDC42EP1	ILMN_2401964	ENSG00000128283	CDC42 effector protein 1
	CDC42EP1	ILMN_1764927	ENSG00000128283	CDC42 effector protein 1
	CDC42SE2	ILMN_1735594	ENSG00000158985	CDC42 small effector 2
	CDCP2	ILMN_2118621	ENSG00000157211	CUB domain containing protein 2
	CDK1	ILMN_1710428	ENSG00000170312	cyclin dependent kinase 1
	CDK2	ILMN_1653443	ENSG00000123374	cyclin dependent kinase 2
	CDKL5	ILMN_2277725	ENSG00000008086	cyclin dependent kinase like 5
	CDKN2B	ILMN_2376723	ENSG00000147883	cyclin dependent kinase inhibitor 2B
	CERCAM	ILMN_1750563	ENSG00000167123	cerebral endothelial cell adhesion molecule
	CERT1	ILMN_2292123	ENSG00000113163	ceramide transporter 1
	CFAP20	ILMN_2112599	ENSG00000070761	cilia and flagella associated protein 20
	CFAP221	ILMN_1688126	ENSG00000163075	cilia and flagella associated protein 221
	CFAP251	ILMN_1800341	ENSG00000158023	cilia and flagella associated protein 251
	CFAP46	ILMN_1724517	ENSG00000171811	cilia and flagella associated protein 46
	CFAP70	ILMN_1784516	ENSG00000156042	cilia and flagella associated protein 70
	CFAP74	ILMN_1749317	ENSG00000142609	cilia and flagella associated protein 74
	CFH	ILMN_1698144	ENSG00000000971	complement factor H
	CFH	ILMN_2412192	ENSG00000000971	complement factor H
	CGB3	ILMN_2153029	ENSG00000104827	chorionic gonadotropin subunit beta 3
	CGB5	ILMN_2153029	ENSG00000189052	chorionic gonadotropin subunit beta 5
	CHCHD3	ILMN_1673026	ENSG00000106554	coiled-coil-helix-coiled-coil-helix domain containing 3
	CHEK1	ILMN_1664630	ENSG00000149554	checkpoint kinase 1
	CHID1	ILMN_2069615	ENSG00000177830	chitinase domain containing 1
	CHMP2B	ILMN_1741176	ENSG00000083937	charged multivesicular body protein 2B
	CHP1	ILMN_1779401	ENSG00000187446	calcineurin like EF-hand protein 1
	CHPF2	ILMN_1772991	ENSG00000033100	chondroitin polymerizing factor 2
	CHRM2	ILMN_2358718	ENSG00000181072	cholinergic receptor muscarinic 2
	CHTF8	ILMN_1779780	ENSG00000168802	chromosome transmission fidelity factor 8
	CIC	ILMN_1784780	ENSG00000079432	capicua transcriptional repressor
	CILK1	ILMN_1706154	ENSG00000112144	ciliogenesis associated kinase 1
	CIPC	ILMN_2097858	ENSG00000198894	CLOCK interacting pacemaker
	CITED1	ILMN_1691641	ENSG00000125931	Cbp/p300 interacting transactivator with Glu/Asp rich carboxy-terminal domain 1
	CLDN8	ILMN_2072568	ENSG00000156284	claudin 8
	CLDND2	ILMN_2077680	ENSG00000160318	claudin domain containing 2
	CLEC18C	ILMN_1730964	ENSG00000157335	C-type lectin domain family 18 member C
	CLINT1	ILMN_1745076	ENSG00000113282	clathrin interactor 1
	CLIP4	ILMN_1759792	ENSG00000115295	CAP-Gly domain containing linker protein family member 4
	CLK3	ILMN_2394027	ENSG00000179335	CDC like kinase 3
	CLPX	ILMN_1709894	ENSG00000166855	caseinolytic mitochondrial matrix peptidase chaperone subunit X
	CLU	ILMN_1798298	ENSG00000120885	clusterin
	CNFN	ILMN_1803838	ENSG00000105427	cornifelin
	CNTFR	ILMN_1809456	ENSG00000122756	ciliary neurotrophic factor receptor
	CNTN5	ILMN_1710289	ENSG00000149972	contactin 5
	CNTN5	ILMN_1727909	ENSG00000149972	contactin 5
	CNTN6	ILMN_1699317	ENSG00000134115	contactin 6
	CNTNAP5	ILMN_1710394	ENSG00000155052	contactin associated protein family member 5
	COA6	ILMN_1681741	ENSG00000168275	cytochrome c oxidase assembly factor 6
	COBLL1	ILMN_1761260	ENSG00000082438	cordon-bleu WH2 repeat protein like 1
	COL25A1	ILMN_1791112	ENSG00000188517	collagen type XXV alpha 1 chain
	COL4A1	ILMN_1653028	ENSG00000187498	collagen type IV alpha 1 chain
	COL4A2	ILMN_1724994	ENSG00000134871	collagen type IV alpha 2 chain
	COMT	ILMN_1810941	ENSG00000093010	catechol-O-methyltransferase
	COPS7B	ILMN_1784785	ENSG00000144524	COP9 signalosome subunit 7B
	COX6B2	ILMN_2176467	ENSG00000160471	cytochrome c oxidase subunit 6B2
	CPED1	ILMN_1677038	ENSG00000106034	cadherin like and PC-esterase domain containing 1
	CPM	ILMN_1698313	ENSG00000135678	carboxypeptidase M
	CPN2	ILMN_1781013	ENSG00000178772	carboxypeptidase N subunit 2
	CPNE6	ILMN_1738058	ENSG00000100884	copine 6
	CPSF7	ILMN_1680494	ENSG00000149532	cleavage and polyadenylation specific factor 7
	CRAT	ILMN_1737992	ENSG00000095321	carnitine O-acetyltransferase
	CRELD1	ILMN_1739558	ENSG00000163703	cysteine rich with EGF like domains 1
	CRHR1	ILMN_1732426	ENSG00000120088	corticotropin releasing hormone receptor 1
	CRISP2	ILMN_1775569	ENSG00000124490	cysteine rich secretory protein 2
	CRK	ILMN_1666494	ENSG00000167193	CRK proto-oncogene, adaptor protein
	CRLS1	ILMN_1737685	ENSG00000088766	cardiolipin synthase 1
	CRYAB	ILMN_1729216	ENSG00000109846	crystallin alpha B
	CRYM	ILMN_1690179	ENSG00000103316	crystallin mu
	CSAG2	ILMN_2297352	ENSG00000268902	CSAG family member 2
	CSAG3	ILMN_2297352	ENSG00000268916	CSAG family member 3
	CSDE1	ILMN_1683538	ENSG00000009307	cold shock domain containing E1
	CSMD3	ILMN_1730996	ENSG00000164796	CUB and Sushi multiple domains 3
	CSNK2A1	ILMN_2386354	ENSG00000101266	casein kinase 2 alpha 1
	CST6	ILMN_1697733	ENSG00000175315	cystatin E/M
	CST9	ILMN_1702372	ENSG00000173335	cystatin 9
	CSTPP1	ILMN_1796440	ENSG00000149179	centriolar satellite-associated tubulin polyglutamylase complex regulator 1
	CT45A10	ILMN_2402042	ENSG00000269586	cancer/testis antigen family 45 member A10
	CTSE	ILMN_1693738	ENSG00000196188	cathepsin E
	CTSF	ILMN_1804955	ENSG00000174080	cathepsin F
	CUEDC2	ILMN_1773018	ENSG00000107874	CUE domain containing 2
	CYB561A3	ILMN_2129505	ENSG00000162144	cytochrome b561 family member A3
	CYB5A	ILMN_2312194	ENSG00000166347	cytochrome b5 type A
	CYB5A	ILMN_1714167	ENSG00000166347	cytochrome b5 type A
	CYB5R1	ILMN_1729237	ENSG00000159348	cytochrome b5 reductase 1
	CYP46A1	ILMN_1697433	ENSG00000036530	cytochrome P450 family 46 subfamily A member 1
	CYP4F3	ILMN_2089484	ENSG00000186529	cytochrome P450 family 4 subfamily F member 3
	DAP3	ILMN_1781680	ENSG00000132676	death associated protein 3
	DCDC1	ILMN_2209671	ENSG00000170959	doublecortin domain containing 1
	DCLRE1C	ILMN_1678464	ENSG00000152457	DNA cross-link repair 1C
	DCUN1D4	ILMN_2389429	ENSG00000109184	defective in cullin neddylation 1 domain containing 4
	DDC	ILMN_2228463	ENSG00000132437	dopa decarboxylase
	DDHD1	ILMN_2208455	ENSG00000100523	DDHD domain containing 1
	DDHD2	ILMN_2179063	ENSG00000085788	DDHD domain containing 2
	DDT	ILMN_1690982	ENSG00000099977	D-dopachrome tautomerase
	DDX42	ILMN_1674163	ENSG00000198231	DEAD-box helicase 42
	DDX49	ILMN_1762225	ENSG00000105671	DEAD-box helicase 49
	DEFB125	ILMN_1706077	ENSG00000178591	defensin beta 125
	DENND2B	ILMN_1692207	ENSG00000166444	DENN domain containing 2B
	DENND2D	ILMN_1707088	ENSG00000162777	DENN domain containing 2D
	DERPC	ILMN_1779780	ENSG00000286140	DERPC proline and glycine rich nuclear protein
	DHCR24	ILMN_1725510	ENSG00000116133	24-dehydrocholesterol reductase
	DHRS4L2	ILMN_1761450	ENSG00000187630	dehydrogenase/reductase 4 like 2
	DHX40	ILMN_2325008	ENSG00000108406	DEAH-box helicase 40
	DLD	ILMN_1664577	ENSG00000091140	dihydrolipoamide dehydrogenase
	DLEU7	ILMN_1782881	ENSG00000186047	deleted in lymphocytic leukemia 7
	DLG1	ILMN_1701958	ENSG00000075711	discs large MAGUK scaffold protein 1
	DLG3	ILMN_2255043	ENSG00000082458	discs large MAGUK scaffold protein 3
	DMAC2L	ILMN_1700625	ENSG00000125375	distal membrane arm assembly component 2 like
	DMAC2L	ILMN_2299843	ENSG00000125375	distal membrane arm assembly component 2 like
	DNAJC11	ILMN_1747903	ENSG00000007923	DnaJ heat shock protein family (Hsp40) member C11
	DNAJC21	ILMN_1714563	ENSG00000168724	DnaJ heat shock protein family (Hsp40) member C21
	DNAJC3	ILMN_1659843	ENSG00000102580	DnaJ heat shock protein family (Hsp40) member C3
	DND1	ILMN_1780991	ENSG00000256453	DND microRNA-mediated repression inhibitor 1
	DPH3	ILMN_1679912	ENSG00000154813	diphthamide biosynthesis 3
	DPH3	ILMN_2349610	ENSG00000154813	diphthamide biosynthesis 3
	DPH3	ILMN_2261973	ENSG00000154813	diphthamide biosynthesis 3
	DPM1	ILMN_2105308	ENSG00000000419	dolichyl-phosphate mannosyltransferase subunit 1, catalytic
	DPP8	ILMN_2260926	ENSG00000074603	dipeptidyl peptidase 8
	DPY19L4	ILMN_1775573	ENSG00000156162	dpy-19 like 4
	DRAXIN	ILMN_2047460	ENSG00000162490	dorsal inhibitory axon guidance protein
	DRD3	ILMN_2361810	ENSG00000151577	dopamine receptor D3
	DSC2	ILMN_2381257	ENSG00000134755	desmocollin 2
	DTD2	ILMN_1704238	ENSG00000129480	D-aminoacyl-tRNA deacylase 2
	DTNB	ILMN_1798819	ENSG00000138101	dystrobrevin beta
	DTX1	ILMN_1689002	ENSG00000135144	deltex E3 ubiquitin ligase 1
	DUSP22	ILMN_1730765	ENSG00000112679	dual specificity phosphatase 22
	DUSP29	ILMN_1656225	ENSG00000188716	dual specificity phosphatase 29
	DYNC2LI1	ILMN_1811836	ENSG00000138036	dynein cytoplasmic 2 light intermediate chain 1
	DYRK1A	ILMN_2374293	ENSG00000157540	dual specificity tyrosine phosphorylation regulated kinase 1A
	EAF1	ILMN_1685012	ENSG00000144597	ELL associated factor 1
	EBLN2	ILMN_2186877	ENSG00000255423	endogenous Bornavirus like nucleoprotein 2
	ECHDC3	ILMN_2072178	ENSG00000134463	enoyl-CoA hydratase domain containing 3
	EFHB	ILMN_2199409	ENSG00000163576	EF-hand domain family member B
	EGLN1	ILMN_1749892	ENSG00000135766	egl-9 family hypoxia inducible factor 1
	EGR3	ILMN_1724280	ENSG00000179388	early growth response 3
	EIF1AX	ILMN_1770895	ENSG00000173674	eukaryotic translation initiation factor 1A X-linked
	EIF1AXP1	ILMN_1770895	ENSG00000236698	EIF1AX pseudogene 1
	EIF4G2	ILMN_2279635	ENSG00000110321	eukaryotic translation initiation factor 4 gamma 2
	ELF1	ILMN_1664010	ENSG00000120690	E74 like ETS transcription factor 1
	ELP4	ILMN_1659339	ENSG00000109911	elongator acetyltransferase complex subunit 4
	EMP1	ILMN_1801616	ENSG00000134531	epithelial membrane protein 1
	EPB41L4B	ILMN_1810051	ENSG00000095203	erythrocyte membrane protein band 4.1 like 4B
	EPB41L5	ILMN_2043306	ENSG00000115109	erythrocyte membrane protein band 4.1 like 5
	EPCAM	ILMN_2160209	ENSG00000119888	epithelial cell adhesion molecule
	EPHA6	ILMN_1719531	ENSG00000080224	EPH receptor A6
	EPHX1	ILMN_1701025	ENSG00000143819	epoxide hydrolase 1
	EPPIN	ILMN_2356378	ENSG00000101448	epididymal peptidase inhibitor
	ERGIC1	ILMN_1651499	ENSG00000113719	endoplasmic reticulum-golgi intermediate compartment 1
	ERLIN2	ILMN_1669729	ENSG00000147475	ER lipid raft associated 2
	ERMAP	ILMN_1715013	ENSG00000164010	erythroblast membrane associated protein (Scianna blood group)
	ERRFI1	ILMN_1665510	ENSG00000116285	ERBB receptor feedback inhibitor 1
	ESYT1	ILMN_1761159	ENSG00000139641	extended synaptotagmin 1
	EXD2	ILMN_1771689	ENSG00000081177	exonuclease 3'-5' domain containing 2
	EXOG	ILMN_1709747	ENSG00000157036	exo/endonuclease G
	EXT2	ILMN_2328029	ENSG00000151348	exostosin glycosyltransferase 2
	EYA2	ILMN_1754077	ENSG00000064655	EYA transcriptional coactivator and phosphatase 2
	EYA3	ILMN_1790562	ENSG00000158161	EYA transcriptional coactivator and phosphatase 3
	FABP1	ILMN_1678965	ENSG00000163586	fatty acid binding protein 1
	FABP2	ILMN_1740479	ENSG00000145384	fatty acid binding protein 2
	FAM13A	ILMN_2401253	ENSG00000138640	family with sequence similarity 13 member A
	FAM171B	ILMN_1653376	ENSG00000144369	family with sequence similarity 171 member B
	FAM178B	ILMN_1804993	ENSG00000168754	family with sequence similarity 178 member B
	FAM222A	ILMN_1772446	ENSG00000139438	family with sequence similarity 222 member A
	FAM227B	ILMN_1795984	ENSG00000166262	family with sequence similarity 227 member B
	FAM241A	ILMN_2069821	ENSG00000174749	family with sequence similarity 241 member A
	FAM47E-STBD1	ILMN_1673950	ENSG00000272414	FAM47E-STBD1 readthrough
	FAM83B	ILMN_1782863	ENSG00000168143	family with sequence similarity 83 member B
	FAM91A1	ILMN_1777322	ENSG00000176853	family with sequence similarity 91 member A1
	FANCD2OS	ILMN_2071028	ENSG00000163705	FANCD2 opposite strand
	FBN3	ILMN_1719755	ENSG00000142449	fibrillin 3
	FBXL16	ILMN_1697561	ENSG00000127585	F-box and leucine rich repeat protein 16
	FBXL17	ILMN_1715901	ENSG00000145743	F-box and leucine rich repeat protein 17
	FBXL21P	ILMN_1717252	ENSG00000164616	F-box and leucine rich repeat protein 21, pseudogene
	FBXO15	ILMN_1755281	ENSG00000141665	F-box protein 15
	FBXO3	ILMN_2273261	ENSG00000110429	F-box protein 3
	FCHO1	ILMN_1654571	ENSG00000130475	FCH and mu domain containing endocytic adaptor 1
	FEM1B	ILMN_1744239	ENSG00000169018	fem-1 homolog B
	FEM1C	ILMN_1703330	ENSG00000145780	fem-1 homolog C
	FER1L4	ILMN_2206722	ENSG00000088340	fer-1 like family member 4 (pseudogene)
	FGA	ILMN_1656487	ENSG00000171560	fibrinogen alpha chain
	FGB	ILMN_2114972	ENSG00000171564	fibrinogen beta chain
	FGF1	ILMN_2349982	ENSG00000113578	fibroblast growth factor 1
	FGFRL1	ILMN_2348367	ENSG00000127418	fibroblast growth factor receptor like 1
	FGFRL1	ILMN_1795865	ENSG00000127418	fibroblast growth factor receptor like 1
	FGL1	ILMN_2366192	ENSG00000104760	fibrinogen like 1
	FHL1	ILMN_1805842	ENSG00000022267	four and a half LIM domains 1
	FIGNL1	ILMN_2389114	ENSG00000132436	fidgetin like 1
	FLT4	ILMN_1794741	ENSG00000037280	fms related receptor tyrosine kinase 4
	FMNL2	ILMN_1730491	ENSG00000157827	formin like 2
	FMOD	ILMN_1789639	ENSG00000122176	fibromodulin
	FN1	ILMN_1675646	ENSG00000115414	fibronectin 1
	FNBP1L	ILMN_1809895	ENSG00000137942	formin binding protein 1 like
	FNTA	ILMN_2374191	ENSG00000168522	farnesyltransferase, CAAX box, alpha
	FOXJ3	ILMN_2128668	ENSG00000198815	forkhead box J3
	FOXK2	ILMN_2241317	ENSG00000141568	forkhead box K2
	FREM1	ILMN_1715452	ENSG00000164946	FRAS1 related extracellular matrix 1
	FRMD1	ILMN_1742390	ENSG00000153303	FERM domain containing 1
	FSBP	ILMN_1669745	ENSG00000265817	fibrinogen silencer binding protein
	FSIP2	ILMN_1718172	ENSG00000188738	fibrous sheath interacting protein 2
	FXR1	ILMN_1679640	ENSG00000114416	FMR1 autosomal homolog 1
	FZD5	ILMN_1798971	ENSG00000163251	frizzled class receptor 5
	FAAH	ILMN_1810915	ENSG00000117480	fatty acid amide hydrolase
	G6PC2	ILMN_2394421	ENSG00000152254	glucose-6-phosphatase catalytic subunit 2
	GABARAPL1	ILMN_2151281	ENSG00000139112	GABA type A receptor associated protein like 1
	GABPAP	ILMN_1682403	ENSG00000235720	GABPA pseudogene
	GABRB2	ILMN_1798046	ENSG00000145864	gamma-aminobutyric acid type A receptor subunit beta2
	GABRE	ILMN_1784706	ENSG00000102287	gamma-aminobutyric acid type A receptor subunit epsilon
	GADD45A	ILMN_2052208	ENSG00000116717	growth arrest and DNA damage inducible alpha
	GALC	ILMN_2415572	ENSG00000054983	galactosylceramidase
	GALE	ILMN_1777523	ENSG00000117308	UDP-galactose-4-epimerase
	GALNTL6	ILMN_2076429	ENSG00000174473	polypeptide N-acetylgalactosaminyltransferase like 6
	GATA1	ILMN_1797251	ENSG00000102145	GATA binding protein 1
	GATB	ILMN_1753010	ENSG00000059691	glutamyl-tRNA amidotransferase subunit B
	GCDH	ILMN_2296843	ENSG00000105607	glutaryl-CoA dehydrogenase
	GCK	ILMN_1676437	ENSG00000106633	glucokinase
	GCLM	ILMN_2225974	ENSG00000023909	glutamate-cysteine ligase modifier subunit
	GCNT3	ILMN_1712082	ENSG00000140297	glucosaminyl (N-acetyl) transferase 3, mucin type
	GDPD2	ILMN_1726549	ENSG00000130055	glycerophosphodiester phosphodiesterase domain containing 2
	GFER	ILMN_1768055	ENSG00000127554	growth factor, augmenter of liver regeneration
	GFPT1	ILMN_2220187	ENSG00000198380	glutamine--fructose-6-phosphate transaminase 1
	GGT3P	ILMN_2190486	ENSG00000197421	gamma-glutamyltransferase 3 pseudogene
	GGTLC1	ILMN_1651236	ENSG00000149435	gamma-glutamyltransferase light chain 1
	GID4	ILMN_2113016	ENSG00000141034	GID complex subunit 4 homolog
	GJA1	ILMN_1727087	ENSG00000152661	gap junction protein alpha 1
	GLB1L	ILMN_2217513	ENSG00000163521	galactosidase beta 1 like
	GLRB	ILMN_1669631	ENSG00000109738	glycine receptor beta
	GLYAT	ILMN_1668510	ENSG00000149124	glycine-N-acyltransferase
	GNA12	ILMN_1692191	ENSG00000146535	G protein subunit alpha 12
	GNAI3	ILMN_1696003	ENSG00000065135	G protein subunit alpha i3
	GNAQ	ILMN_1659923	ENSG00000156052	G protein subunit alpha q
	GNRH2	ILMN_2354285	ENSG00000125787	gonadotropin releasing hormone 2
	GOSR1	ILMN_2401033	ENSG00000108587	golgi SNAP receptor complex member 1
	GPC3	ILMN_2051972	ENSG00000147257	glypican 3
	GPC5	ILMN_1688886	ENSG00000179399	glypican 5
	GPC6	ILMN_1805216	ENSG00000183098	glypican 6
	GPN2	ILMN_2205245	ENSG00000142751	GPN-loop GTPase 2
	GPR27	ILMN_1744034	ENSG00000170837	G protein-coupled receptor 27
	GPX1	ILMN_1749662	ENSG00000233276	glutathione peroxidase 1
	GPX1	ILMN_1787412	ENSG00000233276	glutathione peroxidase 1
	GPX1P1	ILMN_1749662	ENSG00000197582	glutathione peroxidase pseudogene 1
	GRIK2	ILMN_2396697	ENSG00000164418	glutamate ionotropic receptor kainate type subunit 2
	GRIN3A	ILMN_1758400	ENSG00000198785	glutamate ionotropic receptor NMDA type subunit 3A
	GRM5	ILMN_1688614	ENSG00000168959	glutamate metabotropic receptor 5
	GTF2E2	ILMN_1664931	ENSG00000197265	general transcription factor IIE subunit 2
	GTF2I	ILMN_1673917	ENSG00000263001	general transcription factor IIi
	GUCA1C	ILMN_1787360	ENSG00000138472	guanylate cyclase activator 1C
	GYG2	ILMN_1684017	ENSG00000056998	glycogenin 2
	GYG2	ILMN_2319424	ENSG00000056998	glycogenin 2
	H1-7	ILMN_1756125	ENSG00000187166	H1.7 linker histone
	H2AC18	ILMN_2144426	ENSG00000288825	H2A clustered histone 18
	H2AC19	ILMN_2144426	ENSG00000288859	H2A clustered histone 19
	H2AJ	ILMN_1708728	ENSG00000246705	H2A.J histone
	H2BC5	ILMN_1651496	ENSG00000158373	H2B clustered histone 5
	H2BC6	ILMN_1651496	ENSG00000274290	H2B clustered histone 6
	H2BK1	ILMN_2284941	ENSG00000285480	H2B.K variant histone 1
	H3-4	ILMN_1707173	ENSG00000168148	H3.4 histone, cluster member
	H3C1	ILMN_1776845	ENSG00000275714	H3 clustered histone 1
	H4C13	ILMN_1782329	ENSG00000275126	H4 clustered histone 13
	HACE1	ILMN_1740217	ENSG00000085382	HECT domain and ankyrin repeat containing E3 ubiquitin protein ligase 1
	HAPLN2	ILMN_1678788	ENSG00000132702	hyaluronan and proteoglycan link protein 2
	HARS1	ILMN_1780991	ENSG00000170445	histidyl-tRNA synthetase 1
	HAUS8	ILMN_2365528	ENSG00000131351	HAUS augmin like complex subunit 8
	HDAC5	ILMN_2388166	ENSG00000108840	histone deacetylase 5
	HILPDA	ILMN_1659990	ENSG00000135245	hypoxia inducible lipid droplet associated
	HIPK1	ILMN_1661188	ENSG00000163349	homeodomain interacting protein kinase 1
	HIPK3	ILMN_2337551	ENSG00000110422	homeodomain interacting protein kinase 3
	HIPK3	ILMN_1746941	ENSG00000110422	homeodomain interacting protein kinase 3
	HK1	ILMN_1761829	ENSG00000156515	hexokinase 1
	HMGCL	ILMN_1777523	ENSG00000117305	3-hydroxy-3-methylglutaryl-CoA lyase
	HMGN2P46	ILMN_2372241	ENSG00000179362	high mobility group nucleosomal binding domain 2 pseudogene 46
	HNMT	ILMN_1790881	ENSG00000150540	histamine N-methyltransferase
	HNRNPA1P16	ILMN_2191759	ENSG00000262333	heterogeneous nuclear ribonucleoprotein A1 pseudogene 16
	HOGA1	ILMN_1777591	ENSG00000241935	4-hydroxy-2-oxoglutarate aldolase 1
	HOXB1	ILMN_1718079	ENSG00000120094	homeobox B1
	HPN	ILMN_1704089	ENSG00000105707	hepsin
	HPS5	ILMN_2411731	ENSG00000110756	HPS5 biogenesis of lysosomal organelles complex 2 subunit 2
	HSD17B10	ILMN_2355971	ENSG00000072506	hydroxysteroid 17-beta dehydrogenase 10
	HTR3A	ILMN_1662070	ENSG00000166736	5-hydroxytryptamine receptor 3A
	HTR5A	ILMN_1721147	ENSG00000157219	5-hydroxytryptamine receptor 5A
	HYDIN	ILMN_1733287	ENSG00000157423	HYDIN axonemal central pair apparatus protein
	HYDIN2	ILMN_1733287	ENSG00000276975	HYDIN axonemal central pair apparatus protein 2 (pseudogene)
	HYPK	ILMN_1789136	ENSG00000242028	huntingtin interacting protein K
	ICE2	ILMN_2346460	ENSG00000128915	interactor of little elongation complex ELL subunit 2
	IFNW1	ILMN_2176225	ENSG00000177047	interferon omega 1
	IGFLR1	ILMN_1779177	ENSG00000126246	IGF like family receptor 1
	IKZF5	ILMN_1674024	ENSG00000095574	IKAROS family zinc finger 5
	IL11	ILMN_1788107	ENSG00000095752	interleukin 11
	IL17RE	ILMN_1752089	ENSG00000163701	interleukin 17 receptor E
	IL18BP	ILMN_1742318	ENSG00000137496	interleukin 18 binding protein
	IL1RL1	ILMN_2242900	ENSG00000115602	interleukin 1 receptor like 1
	IL27RA	ILMN_1688152	ENSG00000104998	interleukin 27 receptor subunit alpha
	ILK	ILMN_1732827	ENSG00000166333	integrin linked kinase
	IMPG2	ILMN_1679690	ENSG00000081148	interphotoreceptor matrix proteoglycan 2
	INHBA	ILMN_1719547	ENSG00000122641	inhibin subunit beta A
	IRF7	ILMN_2349061	ENSG00000185507	interferon regulatory factor 7
	IRGQ	ILMN_1792955	ENSG00000167378	immunity related GTPase Q
	IRS2	ILMN_2083469	ENSG00000185950	insulin receptor substrate 2
	IRX2-DT	ILMN_1695852	ENSG00000186493	IRX2 divergent transcript
	ISCU	ILMN_1735432	ENSG00000136003	iron-sulfur cluster assembly enzyme
	ISX	ILMN_1756502	ENSG00000175329	intestine specific homeobox
	ITGAD	ILMN_1681945	ENSG00000156886	integrin subunit alpha D
	ITGB1BP1	ILMN_1665107	ENSG00000119185	integrin subunit beta 1 binding protein 1
	ITPKA	ILMN_1776516	ENSG00000137825	inositol-trisphosphate 3-kinase A
	ITSN1	ILMN_1672741	ENSG00000205726	intersectin 1
	JADE1	ILMN_1794473	ENSG00000077684	jade family PHD finger 1
	JAK1	ILMN_1793384	ENSG00000162434	Janus kinase 1
	JAKMIP2	ILMN_1702320	ENSG00000176049	janus kinase and microtubule interacting protein 2
	JRKL	ILMN_1696503	ENSG00000183340	JRK like
	KANK1	ILMN_1773427	ENSG00000107104	KN motif and ankyrin repeat domains 1
	KCNE1	ILMN_2047618	ENSG00000180509	potassium voltage-gated channel subfamily E regulatory subunit 1
	KCNIP2	ILMN_2325534	ENSG00000120049	potassium voltage-gated channel interacting protein 2
	KCNIP3	ILMN_2350823	ENSG00000115041	potassium voltage-gated channel interacting protein 3
	KCNJ5	ILMN_2137312	ENSG00000120457	potassium inwardly rectifying channel subfamily J member 5
	KCTD3	ILMN_2134555	ENSG00000136636	potassium channel tetramerization domain containing 3
	KERA	ILMN_2151304	ENSG00000139330	keratocan
	KIF19	ILMN_1727833	ENSG00000196169	kinesin family member 19
	KIAA1191	ILMN_2376133	ENSG00000122203	KIAA1191
	KLF6	ILMN_1737406	ENSG00000067082	KLF transcription factor 6
	KLF6	ILMN_1735014	ENSG00000067082	KLF transcription factor 6
	KLHDC7B	ILMN_1661314	ENSG00000130487	kelch domain containing 7B
	KRTAP19-3	ILMN_1763883	ENSG00000244025	keratin associated protein 19-3
	KTI12	ILMN_1703226	ENSG00000198841	KTI12 chromatin associated homolog
	KY	ILMN_1748178	ENSG00000174611	kyphoscoliosis peptidase
	KYAT1	ILMN_1803317	ENSG00000286112	kynurenine aminotransferase 1
	LAMB2	ILMN_1752968	ENSG00000172037	laminin subunit beta 2
	LAMP2	ILMN_1659753	ENSG00000005893	lysosomal associated membrane protein 2
	LAMP2	ILMN_2243687	ENSG00000005893	lysosomal associated membrane protein 2
	LAPTM4A	ILMN_1745110	ENSG00000068697	lysosomal protein transmembrane 4 alpha
	LAT	ILMN_2281320	ENSG00000213658	linker for activation of T cells
	LCE3E	ILMN_1808220	ENSG00000185966	late cornified envelope 3E
	LENG8	ILMN_1654890	ENSG00000167615	leukocyte receptor cluster member 8
	LEP	ILMN_2207505	ENSG00000174697	leptin
	LEPR	ILMN_2330570	ENSG00000116678	leptin receptor
	LGALS8	ILMN_2356654	ENSG00000116977	galectin 8
	LHFPL3	ILMN_1663718	ENSG00000187416	LHFPL tetraspan subfamily member 3
	LHPP	ILMN_1752199	ENSG00000107902	phospholysine phosphohistidine inorganic pyrophosphate phosphatase
	LIAS	ILMN_2393341	ENSG00000121897	lipoic acid synthetase
	LIMCH1	ILMN_2139761	ENSG00000064042	LIM and calponin homology domains 1
	LINC00336	ILMN_1717726	ENSG00000197251	long intergenic non-protein coding RNA 336
	LINC00477	ILMN_1789323	ENSG00000197503	long intergenic non-protein coding RNA 477
	LINC00602	ILMN_1742967	ENSG00000281832	long intergenic non-protein coding RNA 602
	LINC01366	ILMN_1730828	ENSG00000235172	long intergenic non-protein coding RNA 1366
	LINC02210-CRHR1	ILMN_1732426	ENSG00000263715	LINC02210-CRHR1 readthrough
	LINC02875	ILMN_1783682	ENSG00000187013	long intergenic non-protein coding RNA 2875
	LIPE	ILMN_1670693	ENSG00000079435	lipase E, hormone sensitive type
	LNPEP	ILMN_1814737	ENSG00000113441	leucyl and cystinyl aminopeptidase
	LOX	ILMN_1695880	ENSG00000113083	lysyl oxidase
	LPGAT1	ILMN_2151277	ENSG00000123684	lysophosphatidylglycerol acyltransferase 1
	LPL	ILMN_1786444	ENSG00000175445	lipoprotein lipase
	LPO	ILMN_1670767	ENSG00000167419	lactoperoxidase
	LRPAP1	ILMN_1660341	ENSG00000163956	LDL receptor related protein associated protein 1
	LRRC41	ILMN_1712755	ENSG00000132128	leucine rich repeat containing 41
	LRRC66	ILMN_1808537	ENSG00000188993	leucine rich repeat containing 66
	LSM10	ILMN_1751803	ENSG00000181817	LSM10, U7 small nuclear RNA associated
	LSM14B	ILMN_1777725	ENSG00000149657	LSM family member 14B
	LSP1	ILMN_1798779	ENSG00000130592	lymphocyte specific protein 1
	LSS	ILMN_1658271	ENSG00000160285	lanosterol synthase
	LSS	ILMN_1687863	ENSG00000160285	lanosterol synthase
	LY6D	ILMN_1814270	ENSG00000167656	lymphocyte antigen 6 family member D
	LYPD1	ILMN_1668863	ENSG00000150551	LY6/PLAUR domain containing 1
	M1AP	ILMN_1797972	ENSG00000159374	meiosis 1 associated protein
	MACO1	ILMN_1718831	ENSG00000204178	macoilin 1
	MACROD1	ILMN_1740960	ENSG00000133315	mono-ADP ribosylhydrolase 1
	MAD2L1BP	ILMN_1798454	ENSG00000124688	MAD2L1 binding protein
	MAEA	ILMN_1689257	ENSG00000090316	macrophage erythroblast attacher, E3 ubiquitin ligase
	MAGEA8	ILMN_2069915	ENSG00000156009	MAGE family member A8
	MAGI2	ILMN_1715255	ENSG00000187391	membrane associated guanylate kinase, WW and PDZ domain containing 2
	MAGOH	ILMN_2215656	ENSG00000162385	mago homolog, exon junction complex subunit
	MAL2	ILMN_1770653	ENSG00000147676	mal, T cell differentiation protein 2
	MAN1A1	ILMN_1742187	ENSG00000111885	mannosidase alpha class 1A member 1
	MAP1LC3B	ILMN_1703244	ENSG00000140941	microtubule associated protein 1 light chain 3 beta
	MAP4K3	ILMN_1813120	ENSG00000011566	mitogen-activated protein kinase kinase kinase kinase 3
	MAP4K5	ILMN_2408908	ENSG00000012983	mitogen-activated protein kinase kinase kinase kinase 5
	MAP4K5	ILMN_1759030	ENSG00000012983	mitogen-activated protein kinase kinase kinase kinase 5
	MAPK10	ILMN_2256907	ENSG00000109339	mitogen-activated protein kinase 10
	MAPK15	ILMN_1768506	ENSG00000181085	mitogen-activated protein kinase 15
	MAPT	ILMN_2310814	ENSG00000186868	microtubule associated protein tau
	MARK3	ILMN_1704795	ENSG00000075413	microtubule affinity regulating kinase 3
	MASP1	ILMN_2240866	ENSG00000127241	MBL associated serine protease 1
	MASP1	ILMN_1809537	ENSG00000127241	MBL associated serine protease 1
	MASP1	ILMN_1724300	ENSG00000127241	MBL associated serine protease 1
	MAST2	ILMN_1690922	ENSG00000086015	microtubule associated serine/threonine kinase 2
	MATR3	ILMN_1660179	ENSG00000015479	matrin 3
	MBTPS1	ILMN_1767256	ENSG00000140943	membrane bound transcription factor peptidase, site 1
	MCL1	ILMN_1756806	ENSG00000143384	MCL1 apoptosis regulator, BCL2 family member
	MCPH1	ILMN_1753122	ENSG00000147316	microcephalin 1
	MDFIC	ILMN_1717366	ENSG00000135272	MyoD family inhibitor domain containing
	MED13L	ILMN_1683959	ENSG00000123066	mediator complex subunit 13L
	MED7	ILMN_2229170	ENSG00000155868	mediator complex subunit 7
	METTL23	ILMN_1688727	ENSG00000181038	methyltransferase 23, arginine
	METTL23	ILMN_2382724	ENSG00000181038	methyltransferase 23, arginine
	METTL9	ILMN_2402629	ENSG00000197006	methyltransferase 9, His-X-His N1-histidine
	MGST1	ILMN_1803033	ENSG00000008394	microsomal glutathione S-transferase 1
	MID1	ILMN_1761858	ENSG00000101871	midline 1
	MID2	ILMN_1760180	ENSG00000080561	midline 2
	MINDY2	ILMN_1774259	ENSG00000128923	MINDY lysine 48 deubiquitinase 2
	MINDY3	ILMN_1725594	ENSG00000148481	MINDY lysine 48 deubiquitinase 3
	MIR22HG	ILMN_2390310	ENSG00000186594	MIR22 host gene
	MIR3620	ILMN_2330948	ENSG00000284163	microRNA 3620
	MIR5006	ILMN_1688455	ENSG00000284584	microRNA 5006
	MIR671	ILMN_1772991	ENSG00000284191	microRNA 671
	MIR6836	ILMN_1804051	ENSG00000284047	microRNA 6836
	MIR935	ILMN_2106874	ENSG00000284583	microRNA 935
	MIR99AHG	ILMN_1690703	ENSG00000215386	mir-99a-let-7c cluster host gene
	MLNR	ILMN_1742564	ENSG00000102539	motilin receptor
	MMD	ILMN_1733937	ENSG00000108960	monocyte to macrophage differentiation associated
	MMP1	ILMN_1726448	ENSG00000196611	matrix metallopeptidase 1
	MMP16	ILMN_1791796	ENSG00000156103	matrix metallopeptidase 16
	MMP26	ILMN_2206080	ENSG00000167346	matrix metallopeptidase 26
	MOCS1	ILMN_1798624	ENSG00000124615	molybdenum cofactor synthesis 1
	MPL	ILMN_1776640	ENSG00000117400	MPL proto-oncogene, thrombopoietin receptor
	MPLKIP	ILMN_2183885	ENSG00000168303	M-phase specific PLK1 interacting protein
	MPRIP	ILMN_1678692	ENSG00000133030	myosin phosphatase Rho interacting protein
	MPST	ILMN_1800096	ENSG00000128309	mercaptopyruvate sulfurtransferase
	MRNIP	ILMN_2409879	ENSG00000161010	MRN complex interacting protein
	MRPL1	ILMN_2076658	ENSG00000169288	mitochondrial ribosomal protein L1
	MRPL2	ILMN_1763264	ENSG00000112651	mitochondrial ribosomal protein L2
	MRPL3	ILMN_2230592	ENSG00000114686	mitochondrial ribosomal protein L3
	MRPL35	ILMN_2341952	ENSG00000132313	mitochondrial ribosomal protein L35
	MRPL39	ILMN_1778730	ENSG00000154719	mitochondrial ribosomal protein L39
	MRPL53	ILMN_1813682	ENSG00000204822	mitochondrial ribosomal protein L53
	MRPS12	ILMN_1810866	ENSG00000128626	mitochondrial ribosomal protein S12
	MRPS26	ILMN_1676026	ENSG00000125901	mitochondrial ribosomal protein S26
	MRPS27	ILMN_2138435	ENSG00000113048	mitochondrial ribosomal protein S27
	MRPS30	ILMN_1726743	ENSG00000112996	mitochondrial ribosomal protein S30
	MSH5	ILMN_1651787	ENSG00000204410	mutS homolog 5
	MSRB2	ILMN_1657977	ENSG00000148450	methionine sulfoxide reductase B2
	MTARC1	ILMN_1799106	ENSG00000186205	mitochondrial amidoxime reducing component 1
	MTARC2	ILMN_1665775	ENSG00000117791	mitochondrial amidoxime reducing component 2
	MTERF4	ILMN_1689899	ENSG00000122085	mitochondrial transcription termination factor 4
	MTHFD1	ILMN_1785324	ENSG00000100714	methylenetetrahydrofolate dehydrogenase, cyclohydrolase and formyltetrahydrofolate synthetase 1
	MTRR	ILMN_1702684	ENSG00000124275	5-methyltetrahydrofolate-homocysteine methyltransferase reductase
	MTX1	ILMN_1667222	ENSG00000173171	metaxin 1
	MTX1P1	ILMN_1667222	ENSG00000236675	metaxin 1 pseudogene 1
	MUC2	ILMN_2205622	ENSG00000198788	mucin 2, oligomeric mucus/gel-forming
	MUSK	ILMN_1791190	ENSG00000030304	muscle associated receptor tyrosine kinase
	MUTYH	ILMN_2277537	ENSG00000132781	mutY DNA glycosylase
	MXI1	ILMN_1663497	ENSG00000119950	MAX interactor 1, dimerization protein
	MYADM	ILMN_2308849	ENSG00000179820	myeloid associated differentiation marker
	MYADM	ILMN_2350574	ENSG00000179820	myeloid associated differentiation marker
	MYADML	ILMN_1737513	ENSG00000239649	myeloid associated differentiation marker like (pseudogene)
	MYADML	ILMN_1737513	ENSG00000293267	myeloid associated differentiation marker like (pseudogene)
	MYC	ILMN_2110908	ENSG00000136997	MYC proto-oncogene, bHLH transcription factor
	MYMK	ILMN_1661514	ENSG00000187616	myomaker, myoblast fusion factor
	MYO19	ILMN_2386040	ENSG00000278259	myosin XIX
	MZT1	ILMN_1809662	ENSG00000204899	mitotic spindle organizing protein 1
	NACC2	ILMN_1809522	ENSG00000148411	NACC family member 2
	NAGLU	ILMN_1694980	ENSG00000108784	N-acetyl-alpha-glucosaminidase
	NANOS1	ILMN_1716469	ENSG00000188613	nanos C2HC-type zinc finger 1
	NANOS1	ILMN_1752009	ENSG00000188613	nanos C2HC-type zinc finger 1
	NARS1	ILMN_1732216	ENSG00000134440	asparaginyl-tRNA synthetase 1
	NASP	ILMN_1764778	ENSG00000132780	nuclear autoantigenic sperm protein
	NAT8	ILMN_1815480	ENSG00000144035	N-acetyltransferase 8 (putative)
	NBR2	ILMN_1666169	ENSG00000198496	neighbor of BRCA1 lncRNA 2
	NDRG1	ILMN_1809931	ENSG00000104419	N-myc downstream regulated 1
	NDUFAF3	ILMN_1691557	ENSG00000178057	NADH:ubiquinone oxidoreductase complex assembly factor 3
	NECTIN1	ILMN_1695549	ENSG00000110400	nectin cell adhesion molecule 1
	NEDD4L	ILMN_1733627	ENSG00000049759	NEDD4 like E3 ubiquitin protein ligase
	NEDD9	ILMN_2261076	ENSG00000111859	neural precursor cell expressed, developmentally down-regulated 9
	NEIL3	ILMN_2114747	ENSG00000109674	nei like DNA glycosylase 3
	NEK11	ILMN_1788149	ENSG00000114670	NIMA related kinase 11
	NEK7	ILMN_1758548	ENSG00000151414	NIMA related kinase 7
	NEU3	ILMN_1740524	ENSG00000162139	neuraminidase 3
	NEUROD2	ILMN_1702217	ENSG00000171532	neuronal differentiation 2
	NFAM1	ILMN_1791925	ENSG00000235568	NFAT activating protein with ITAM motif 1
	NHLRC3	ILMN_2393046	ENSG00000188811	NHL repeat containing 3
	NHLRC4	ILMN_1684312	ENSG00000257108	NHL repeat containing 4
	NKD1	ILMN_1692674	ENSG00000140807	NKD inhibitor of WNT signaling pathway 1
	NKIRAS1	ILMN_1664216	ENSG00000197885	NFKB inhibitor interacting Ras like 1
	NKIRAS2	ILMN_1653404	ENSG00000168256	NFKB inhibitor interacting Ras like 2
	NKX2-3	ILMN_1796089	ENSG00000119919	NK2 homeobox 3
	NLRP5	ILMN_1814652	ENSG00000171487	NLR family pyrin domain containing 5
	NLRX1	ILMN_1698752	ENSG00000160703	NLR family member X1
	NOCT	ILMN_1689378	ENSG00000151014	nocturnin
	NOM1	ILMN_2110986	ENSG00000146909	nucleolar protein with MIF4G domain 1
	NOTCH2	ILMN_2405297	ENSG00000134250	notch receptor 2
	NPR1	ILMN_1779897	ENSG00000169418	natriuretic peptide receptor 1
	NR2C1	ILMN_1734867	ENSG00000120798	nuclear receptor subfamily 2 group C member 1
	NR2E1	ILMN_2094294	ENSG00000112333	nuclear receptor subfamily 2 group E member 1
	NSL1	ILMN_2276820	ENSG00000117697	NSL1 component of MIS12 kinetochore complex
	NT5C3B	ILMN_1750511	ENSG00000141698	5'-nucleotidase, cytosolic IIIB
	NTF6A	ILMN_2153029	ENSG00000267019	neurotrophin 6 alpha (pseudogene)
	NTM	ILMN_1798379	ENSG00000182667	neurotrimin
	NTM	ILMN_2351466	ENSG00000182667	neurotrimin
	NTRK2	ILMN_2357855	ENSG00000148053	neurotrophic receptor tyrosine kinase 2
	NUDT8	ILMN_2175659	ENSG00000167799	nudix hydrolase 8
	NUTM1	ILMN_1737624	ENSG00000184507	NUT midline carcinoma family member 1
	NAA50	ILMN_2180606	ENSG00000121579	N-alpha-acetyltransferase 50, NatE catalytic subunit
	ODF1	ILMN_1708182	ENSG00000155087	outer dense fiber of sperm tails 1
	ODF2L	ILMN_2325028	ENSG00000122417	outer dense fiber of sperm tails 2 like
	OPCML	ILMN_1682301	ENSG00000183715	opioid binding protein/cell adhesion molecule like
	OPRM1	ILMN_1803261	ENSG00000112038	opioid receptor mu 1
	OR10AG1	ILMN_1695533	ENSG00000174970	olfactory receptor family 10 subfamily AG member 1
	OR2A14	ILMN_1714891	ENSG00000221938	olfactory receptor family 2 subfamily A member 14
	OR2A5	ILMN_1732024	ENSG00000221836	olfactory receptor family 2 subfamily A member 5
	OR2AK2	ILMN_1702889	ENSG00000187080	olfactory receptor family 2 subfamily AK member 2
	OR4A15	ILMN_2129600	ENSG00000181958	olfactory receptor family 4 subfamily A member 15
	OR4C13	ILMN_1730984	ENSG00000258817	olfactory receptor family 4 subfamily C member 13
	OR4M2	ILMN_2206224	ENSG00000274102	olfactory receptor family 4 subfamily M member 2
	OR4M2B	ILMN_2206224	ENSG00000182974	olfactory receptor family 4 subfamily M member 2B
	OR52B6	ILMN_1811599	ENSG00000187747	olfactory receptor family 52 subfamily B member 6
	OR52E2	ILMN_1708238	ENSG00000176787	olfactory receptor family 52 subfamily E member 2
	OR52L1	ILMN_1765613	ENSG00000183313	olfactory receptor family 52 subfamily L member 1
	OR5AN1	ILMN_1711929	ENSG00000176495	olfactory receptor family 5 subfamily AN member 1
	OR5C1	ILMN_1795178	ENSG00000148215	olfactory receptor family 5 subfamily C member 1
	OR5K1	ILMN_1790988	ENSG00000232382	olfactory receptor family 5 subfamily K member 1
	OR5M11	ILMN_1792254	ENSG00000255223	olfactory receptor family 5 subfamily M member 11
	OR6K6	ILMN_1714817	ENSG00000180433	olfactory receptor family 6 subfamily K member 6
	OR8G5	ILMN_1740409	ENSG00000255298	olfactory receptor family 8 subfamily G member 5
	ORMDL3	ILMN_1662174	ENSG00000172057	ORMDL sphingolipid biosynthesis regulator 3
	OSBP	ILMN_1706376	ENSG00000110048	oxysterol binding protein
	OTUB2	ILMN_1684983	ENSG00000089723	OTU deubiquitinase, ubiquitin aldehyde binding 2
	P2RY2	ILMN_1723535	ENSG00000175591	purinergic receptor P2Y2
	P2RY6	ILMN_1660031	ENSG00000171631	pyrimidinergic receptor P2Y6
	PADI6	ILMN_1748221	ENSG00000276747	peptidyl arginine deiminase 6
	PAIP2	ILMN_1782094	ENSG00000120727	poly(A) binding protein interacting protein 2
	PALM	ILMN_2283185	ENSG00000099864	paralemmin
	PAPOLG	ILMN_1786275	ENSG00000115421	poly(A) polymerase gamma
	PARK7	ILMN_1744713	ENSG00000116288	Parkinsonism associated deglycase
	PAX8	ILMN_1708534	ENSG00000125618	paired box 8
	PAXBP1	ILMN_2331197	ENSG00000159086	PAX3 and PAX7 binding protein 1
	PBLD	ILMN_1760748	ENSG00000108187	phenazine biosynthesis like protein domain containing
	PBX1	ILMN_1784678	ENSG00000185630	PBX homeobox 1
	PCCA	ILMN_1714384	ENSG00000175198	propionyl-CoA carboxylase subunit alpha
	PCDH11X	ILMN_2285951	ENSG00000102290	protocadherin 11 X-linked
	PCDH11Y	ILMN_1688861	ENSG00000099715	protocadherin 11 Y-linked
	PCDH9	ILMN_1668147	ENSG00000184226	protocadherin 9
	PCDHA3	ILMN_2400884	ENSG00000255408	protocadherin alpha 3
	PCDHGA11	ILMN_2386379	ENSG00000253873	protocadherin gamma subfamily A, 11
	PCDHGA3	ILMN_2393775	ENSG00000254245	protocadherin gamma subfamily A, 3
	PCNX1	ILMN_1740010	ENSG00000100731	pecanex 1
	PCOLCE2	ILMN_1746888	ENSG00000163710	procollagen C-endopeptidase enhancer 2
	PCYT1B	ILMN_1811597	ENSG00000102230	phosphate cytidylyltransferase 1B, choline
	PDE7A	ILMN_2379675	ENSG00000205268	phosphodiesterase 7A
	PDE8A	ILMN_1699767	ENSG00000073417	phosphodiesterase 8A
	PDZD2	ILMN_1729095	ENSG00000133401	PDZ domain containing 2
	PDZRN3	ILMN_2406304	ENSG00000121440	PDZ domain containing ring finger 3
	PDZRN3	ILMN_1742949	ENSG00000121440	PDZ domain containing ring finger 3
	PEA15	ILMN_1771376	ENSG00000162734	proliferation and apoptosis adaptor protein 15
	PECR	ILMN_1814120	ENSG00000115425	peroxisomal trans-2-enoyl-CoA reductase
	PEG10	ILMN_2297626	ENSG00000242265	paternally expressed 10
	PELO	ILMN_1770811	ENSG00000152684	pelota mRNA surveillance and ribosome rescue factor
	PEX11A	ILMN_1690695	ENSG00000166821	peroxisomal biogenesis factor 11 alpha
	PEX19	ILMN_1658759	ENSG00000162735	peroxisomal biogenesis factor 19
	PFKFB3	ILMN_2186061	ENSG00000170525	6-phosphofructo-2-kinase/fructose-2,6-biphosphatase 3
	PGM1	ILMN_1800659	ENSG00000079739	phosphoglucomutase 1
	PHKA1	ILMN_1812503	ENSG00000067177	phosphorylase kinase regulatory subunit alpha 1
	PHKB	ILMN_1652412	ENSG00000102893	phosphorylase kinase regulatory subunit beta
	PHOSPHO1	ILMN_1688240	ENSG00000173868	phosphoethanolamine/phosphocholine phosphatase 1
	PIAS2	ILMN_1694799	ENSG00000078043	protein inhibitor of activated STAT 2
	PIAS2	ILMN_1769406	ENSG00000078043	protein inhibitor of activated STAT 2
	PIGK	ILMN_1772743	ENSG00000142892	phosphatidylinositol glycan anchor biosynthesis class K
	PIGP	ILMN_1764871	ENSG00000185808	phosphatidylinositol glycan anchor biosynthesis class P
	PIGP	ILMN_1774949	ENSG00000185808	phosphatidylinositol glycan anchor biosynthesis class P
	PIGS	ILMN_1691291	ENSG00000087111	phosphatidylinositol glycan anchor biosynthesis class S
	PIK3C3	ILMN_1687896	ENSG00000078142	phosphatidylinositol 3-kinase catalytic subunit type 3
	PIK3R1	ILMN_1689057	ENSG00000145675	phosphoinositide-3-kinase regulatory subunit 1
	PIPOX	ILMN_1739050	ENSG00000179761	pipecolic acid and sarcosine oxidase
	PITPNC1	ILMN_1670638	ENSG00000154217	phosphatidylinositol transfer protein cytoplasmic 1
	PIWIL2	ILMN_1711818	ENSG00000197181	piwi like RNA-mediated gene silencing 2
	PJA1	ILMN_2373566	ENSG00000181191	praja ring finger ubiquitin ligase 1
	PLA2G5	ILMN_1807171	ENSG00000127472	phospholipase A2 group V
	PLAC1	ILMN_1754207	ENSG00000170965	placenta enriched 1
	PLAC4	ILMN_1654466	ENSG00000280109	placenta enriched 4
	PLEKHG5	ILMN_1738680	ENSG00000171680	pleckstrin homology and RhoGEF domain containing G5
	PLEKHG5	ILMN_2297644	ENSG00000171680	pleckstrin homology and RhoGEF domain containing G5
	PLOD2	ILMN_1799139	ENSG00000152952	procollagen-lysine,2-oxoglutarate 5-dioxygenase 2
	PLOD2	ILMN_1771599	ENSG00000152952	procollagen-lysine,2-oxoglutarate 5-dioxygenase 2
	PLAAT3	ILMN_1667711	ENSG00000176485	phospholipase A and acyltransferase 3
	PNMA6A	ILMN_1759613	ENSG00000235961	PNMA family member 6A
	POFUT2	ILMN_1701482	ENSG00000186866	protein O-fucosyltransferase 2
	POLR2L	ILMN_1670037	ENSG00000177700	RNA polymerase II, I and III subunit L
	POU3F4	ILMN_1738003	ENSG00000196767	POU class 3 homeobox 4
	POU4F1	ILMN_1738691	ENSG00000152192	POU class 4 homeobox 1
	PPA1	ILMN_1805827	ENSG00000180817	inorganic pyrophosphatase 1
	PPA2	ILMN_1687785	ENSG00000138777	inorganic pyrophosphatase 2
	PPFIA1	ILMN_2382126	ENSG00000131626	PTPRF interacting protein alpha 1
	PPP2R1B	ILMN_1779841	ENSG00000137713	protein phosphatase 2 scaffold subunit Abeta
	PPP2R1B	ILMN_1709247	ENSG00000137713	protein phosphatase 2 scaffold subunit Abeta
	PPP2R1B	ILMN_1704656	ENSG00000137713	protein phosphatase 2 scaffold subunit Abeta
	PPP2R2C	ILMN_1661129	ENSG00000074211	protein phosphatase 2 regulatory subunit Bgamma
	PPP4R2	ILMN_2186877	ENSG00000163605	protein phosphatase 4 regulatory subunit 2
	PPP6C	ILMN_1664921	ENSG00000119414	protein phosphatase 6 catalytic subunit
	PRAMEF5	ILMN_2094648	ENSG00000270601	PRAME family member 5
	PREX2	ILMN_2369179	ENSG00000046889	phosphatidylinositol-3,4,5-trisphosphate dependent Rac exchange factor 2
	PRKACB	ILMN_2374234	ENSG00000142875	protein kinase cAMP-activated catalytic subunit beta
	PRKCQ	ILMN_1733421	ENSG00000065675	protein kinase C theta
	PRKN	ILMN_1714511	ENSG00000185345	parkin RBR E3 ubiquitin protein ligase
	PROKR2	ILMN_2043553	ENSG00000101292	prokineticin receptor 2
	PRPF40B	ILMN_1722200	ENSG00000110844	pre-mRNA processing factor 40 homolog B
	PRPS2	ILMN_1758104	ENSG00000101911	phosphoribosyl pyrophosphate synthetase 2
	PRPS2	ILMN_2399431	ENSG00000101911	phosphoribosyl pyrophosphate synthetase 2
	PRR34	ILMN_1673743	ENSG00000182257	PRR34 long non-coding RNA
	PRSS50	ILMN_1775615	ENSG00000283706	serine protease 50
	PRSS55	ILMN_1806464	ENSG00000184647	serine protease 55
	PRXL2C	ILMN_1717229	ENSG00000158122	peroxiredoxin like 2C
	PSG2	ILMN_2188141	ENSG00000242221	pregnancy specific beta-1-glycoprotein 2
	PSMA1	ILMN_1709611	ENSG00000129084	proteasome 20S subunit alpha 1
	PSMA8	ILMN_1659103	ENSG00000154611	proteasome 20S subunit alpha 8
	PSMB5	ILMN_1744649	ENSG00000100804	proteasome 20S subunit beta 5
	PSMD12	ILMN_2368971	ENSG00000197170	proteasome 26S subunit, non-ATPase 12
	PSPC1	ILMN_1724490	ENSG00000121390	paraspeckle component 1
	PTCD1	ILMN_2225709	ENSG00000106246	pentatricopeptide repeat domain 1
	PTCD2	ILMN_2051867	ENSG00000049883	pentatricopeptide repeat domain 2
	PTCHD4	ILMN_1742467	ENSG00000244694	patched domain containing 4
	PTGER3	ILMN_1677384	ENSG00000050628	prostaglandin E receptor 3
	PTGER3	ILMN_2353110	ENSG00000050628	prostaglandin E receptor 3
	PTGS1	ILMN_1665100	ENSG00000095303	prostaglandin-endoperoxide synthase 1
	PTPN4	ILMN_1793549	ENSG00000088179	protein tyrosine phosphatase non-receptor type 4
	PTPRA	ILMN_2296776	ENSG00000132670	protein tyrosine phosphatase receptor type A
	PTPRS	ILMN_2365644	ENSG00000105426	protein tyrosine phosphatase receptor type S
	PTPRZ1	ILMN_1676616	ENSG00000106278	protein tyrosine phosphatase receptor type Z1
	PUM1	ILMN_1783424	ENSG00000134644	pumilio RNA binding family member 1
	PYGB	ILMN_1778360	ENSG00000100994	glycogen phosphorylase B
	QKI	ILMN_1773485	ENSG00000112531	QKI, KH domain containing RNA binding
	QKI	ILMN_2336280	ENSG00000112531	QKI, KH domain containing RNA binding
	QPCT	ILMN_2113049	ENSG00000115828	glutaminyl-peptide cyclotransferase
	R3HDM1	ILMN_2052383	ENSG00000048991	R3H domain containing 1
	RAB1A	ILMN_2118864	ENSG00000138069	RAB1A, member RAS oncogene family
	RABL3	ILMN_1662306	ENSG00000144840	RAB, member of RAS oncogene family like 3
	RAD51D	ILMN_1743356	ENSG00000185379	RAD51 paralog D
	RAD54B	ILMN_1669745	ENSG00000197275	RAD54 homolog B
	RANBP3L	ILMN_2094856	ENSG00000164188	RAN binding protein 3 like
	RANBP6	ILMN_2177732	ENSG00000137040	RAN binding protein 6
	RAPSN	ILMN_1724806	ENSG00000165917	receptor associated protein of the synapse
	RARRES2	ILMN_1810844	ENSG00000106538	retinoic acid receptor responder 2
	RASA3	ILMN_1654586	ENSG00000185989	RAS p21 protein activator 3
	RASGEF1C	ILMN_1763740	ENSG00000146090	RasGEF domain family member 1C
	RBFA	ILMN_1736130	ENSG00000101546	ribosome binding factor A
	RBFOX1	ILMN_1814316	ENSG00000078328	RNA binding fox-1 homolog 1
	RBM15B	ILMN_1673024	ENSG00000259956	RNA binding motif protein 15B
	RBM33	ILMN_1741244	ENSG00000184863	RNA binding motif protein 33
	RBP4	ILMN_1814719	ENSG00000138207	retinol binding protein 4
	RBPMS	ILMN_1668608	ENSG00000157110	RNA binding protein, mRNA processing factor
	RDH5	ILMN_1773395	ENSG00000135437	retinol dehydrogenase 5
	REEP2	ILMN_1666057	ENSG00000132563	receptor accessory protein 2
	REN	ILMN_1742272	ENSG00000143839	renin
	REXO5	ILMN_1796923	ENSG00000005189	RNA exonuclease 5
	RFFL	ILMN_1743356	ENSG00000092871	ring finger and FYVE like domain containing E3 ubiquitin protein ligase
	RFTN1	ILMN_1800787	ENSG00000131378	raftlin, lipid raft linker 1
	RGS3	ILMN_1724349	ENSG00000138835	regulator of G protein signaling 3
	RGS3	ILMN_2260224	ENSG00000138835	regulator of G protein signaling 3
	RHBDD1	ILMN_2209766	ENSG00000144468	rhomboid domain containing 1
	RHOA	ILMN_1749662	ENSG00000067560	ras homolog family member A
	RHOA	ILMN_1787412	ENSG00000067560	ras homolog family member A
	RIC8B	ILMN_1663532	ENSG00000111785	RIC8 guanine nucleotide exchange factor B
	RIDA	ILMN_2057220	ENSG00000132541	reactive intermediate imine deaminase A homolog
	RIMS4	ILMN_1746031	ENSG00000101098	regulating synaptic membrane exocytosis 4
	RIN1	ILMN_1660858	ENSG00000174791	Ras and Rab interactor 1
	RLN3	ILMN_1717278	ENSG00000171136	relaxin 3
	RN7SL775P	ILMN_1678692	ENSG00000243370	RNA, 7SL, cytoplasmic 775, pseudogene
	RNASE13	ILMN_1762871	ENSG00000206150	ribonuclease A family member 13 (inactive)
	RNASE4	ILMN_2408572	ENSG00000258818	ribonuclease A family member 4
	RNF121	ILMN_1742318	ENSG00000137522	ring finger protein 121
	RNF141	ILMN_1815010	ENSG00000110315	ring finger protein 141
	RNF151	ILMN_1745330	ENSG00000179580	ring finger protein 151
	RNF214	ILMN_1800420	ENSG00000167257	ring finger protein 214
	RNF217	ILMN_1722089	ENSG00000146373	ring finger protein 217
	RNF6	ILMN_1725306	ENSG00000127870	ring finger protein 6
	RNFT2	ILMN_1738093	ENSG00000135119	ring finger protein, transmembrane 2
	RPGR	ILMN_2336803	ENSG00000156313	retinitis pigmentosa GTPase regulator
	RPP25L	ILMN_1683175	ENSG00000164967	ribonuclease P/MRP subunit p25 like
	RRAGC	ILMN_1760121	ENSG00000116954	Ras related GTP binding C
	RRAS2	ILMN_2077623	ENSG00000133818	RAS related 2
	RRAS2P1	ILMN_2077623	ENSG00000236360	RRAS2 pseudogene 1
	RRP7A	ILMN_1688178	ENSG00000189306	ribosomal RNA processing 7 homolog A
	RSPO2	ILMN_2081645	ENSG00000147655	R-spondin 2
	RSPO3	ILMN_1681983	ENSG00000146374	R-spondin 3
	RTCA	ILMN_2059294	ENSG00000137996	RNA 3'-terminal phosphate cyclase
	RTEL1	ILMN_1778629	ENSG00000258366	regulator of telomere elongation helicase 1
	RTEL1-TNFRSF6B	ILMN_1778629	ENSG00000026036	RTEL1-TNFRSF6B readthrough (NMD candidate)
	RTL3	ILMN_1671500	ENSG00000179300	retrotransposon Gag like 3
	RTN4	ILMN_1748983	ENSG00000115310	reticulon 4
	RTN4	ILMN_1730611	ENSG00000115310	reticulon 4
	RTN4	ILMN_2352036	ENSG00000115310	reticulon 4
	RYR1	ILMN_1682062	ENSG00000196218	ryanodine receptor 1
	S100A2	ILMN_1725852	ENSG00000196754	S100 calcium binding protein A2
	S100A5	ILMN_1810857	ENSG00000196420	S100 calcium binding protein A5
	S100A7L2	ILMN_2179283	ENSG00000197364	S100 calcium binding protein A7 like 2
	S100G	ILMN_1715695	ENSG00000169906	S100 calcium binding protein G
	SAR1B	ILMN_2394296	ENSG00000152700	secretion associated Ras related GTPase 1B
	SASH1	ILMN_2185984	ENSG00000111961	SAM and SH3 domain containing 1
	SBNO1	ILMN_1739943	ENSG00000139697	strawberry notch homolog 1
	SCML1	ILMN_1776653	ENSG00000047634	Scm polycomb group protein like 1
	SCN1B	ILMN_1704089	ENSG00000105711	sodium voltage-gated channel beta subunit 1
	SCN2A	ILMN_2271762	ENSG00000136531	sodium voltage-gated channel alpha subunit 2
	SCN3A	ILMN_2387395	ENSG00000153253	sodium voltage-gated channel alpha subunit 3
	SCN3B	ILMN_1700328	ENSG00000166257	sodium voltage-gated channel beta subunit 3
	SCYL1	ILMN_1731991	ENSG00000142186	SCY1 like pseudokinase 1
	SDE2	ILMN_1748291	ENSG00000143751	SDE2 telomere maintenance homolog
	SDR42E1	ILMN_1798817	ENSG00000184860	short chain dehydrogenase/reductase family 42E, member 1
	SDSL	ILMN_1750674	ENSG00000139410	serine dehydratase like
	SEBOX	ILMN_1708886	ENSG00000274529	SEBOX homeobox
	SEC14L3	ILMN_1675770	ENSG00000100012	SEC14 like lipid binding 3
	SECISBP2L	ILMN_1784333	ENSG00000138593	SECIS binding protein 2 like
	SEMA3B	ILMN_1653501	ENSG00000012171	semaphorin 3B
	SEMA3B	ILMN_2406299	ENSG00000012171	semaphorin 3B
	SENP2	ILMN_2123567	ENSG00000163904	SUMO specific peptidase 2
	SEPHS2	ILMN_1687824	ENSG00000179918	selenophosphate synthetase 2
	SEPTIN4	ILMN_2294123	ENSG00000108387	septin 4
	SERF2	ILMN_1789136	ENSG00000140264	small EDRK-rich factor 2
	SERHL	ILMN_2289840	ENSG00000293485	serine hydrolase like (pseudogene)
	SERPINB1	ILMN_1679133	ENSG00000021355	serpin family B member 1
	SERPINF1	ILMN_2141482	ENSG00000132386	serpin family F member 1
	SGCB	ILMN_2194467	ENSG00000163069	sarcoglycan beta
	SGO2	ILMN_2061641	ENSG00000163535	shugoshin 2
	SHISA6	ILMN_1732584	ENSG00000188803	shisa family member 6
	SHMT1	ILMN_2402463	ENSG00000176974	serine hydroxymethyltransferase 1
	SHOC2	ILMN_2158242	ENSG00000108061	SHOC2 leucine rich repeat scaffold protein
	SIGMAR1	ILMN_2398489	ENSG00000147955	sigma non-opioid intracellular receptor 1
	SIL1	ILMN_1678729	ENSG00000120725	SIL1 nucleotide exchange factor
	SIMC1	ILMN_1659079	ENSG00000170085	SUMO interacting motifs containing 1
	SIRPG	ILMN_1771801	ENSG00000089012	signal regulatory protein gamma
	SKA2	ILMN_1807807	ENSG00000182628	spindle and kinetochore associated complex subunit 2
	SKP2	ILMN_1801391	ENSG00000145604	S-phase kinase associated protein 2
	SLC10A3	ILMN_1712887	ENSG00000126903	solute carrier family 10 member 3
	SLC12A4	ILMN_2084059	ENSG00000124067	solute carrier family 12 member 4
	SLC19A3	ILMN_1716359	ENSG00000135917	solute carrier family 19 member 3
	SLC20A2	ILMN_1813763	ENSG00000168575	solute carrier family 20 member 2
	SLC25A23	ILMN_1679949	ENSG00000125648	solute carrier family 25 member 23
	SLC25A24	ILMN_1752639	ENSG00000085491	solute carrier family 25 member 24
	SLC26A1	ILMN_2391169	ENSG00000145217	solute carrier family 26 member 1
	SLC26A7	ILMN_1705172	ENSG00000147606	solute carrier family 26 member 7
	SLC2A12	ILMN_1766261	ENSG00000146411	solute carrier family 2 member 12
	SLC31A2	ILMN_1758938	ENSG00000136867	solute carrier family 31 member 2
	SLC35A3	ILMN_1653429	ENSG00000117620	solute carrier family 35 member A3
	SLC35D3	ILMN_1702419	ENSG00000182747	solute carrier family 35 member D3
	SLC35F3	ILMN_1814797	ENSG00000183780	solute carrier family 35 member F3
	SLC35F5	ILMN_2206554	ENSG00000115084	solute carrier family 35 member F5
	SLC38A5	ILMN_1695058	ENSG00000017483	solute carrier family 38 member 5
	SLC38A8	ILMN_2284077	ENSG00000166558	solute carrier family 38 member 8
	SLC39A10	ILMN_1656129	ENSG00000196950	solute carrier family 39 member 10
	SLC44A4	ILMN_1730977	ENSG00000204385	solute carrier family 44 member 4
	SLC5A10	ILMN_1691503	ENSG00000154025	solute carrier family 5 member 10
	SLC5A11	ILMN_2228780	ENSG00000158865	solute carrier family 5 member 11
	SLC5A12	ILMN_2296510	ENSG00000148942	solute carrier family 5 member 12
	SLC5A12	ILMN_1734676	ENSG00000148942	solute carrier family 5 member 12
	SLC6A20	ILMN_2324109	ENSG00000163817	solute carrier family 6 member 20
	SLC7A2	ILMN_1711451	ENSG00000003989	solute carrier family 7 member 2
	SLX9	ILMN_2104924	ENSG00000160256	SLX9 ribosome biogenesis factor
	SMG8	ILMN_1807533	ENSG00000167447	SMG8 nonsense mediated mRNA decay factor
	SMPD1	ILMN_1757370	ENSG00000166311	sphingomyelin phosphodiesterase 1
	SNCB	ILMN_1779343	ENSG00000074317	synuclein beta
	SNN	ILMN_1788251	ENSG00000184602	stannin
	SNORC	ILMN_1774265	ENSG00000182600	secondary ossification center associated regulator of chondrocyte maturation
	SNORD97	ILMN_2279635	ENSG00000238622	small nucleolar RNA, C/D box 97
	SNRNP35	ILMN_1772845	ENSG00000184209	small nuclear ribonucleoprotein U11/U12 subunit 35
	SNTG1	ILMN_1727975	ENSG00000147481	syntrophin gamma 1
	SNU13	ILMN_1697614	ENSG00000100138	small nuclear ribonucleoprotein 13
	SNX7	ILMN_2290686	ENSG00000162627	sorting nexin 7
	SNX8	ILMN_1804051	ENSG00000106266	sorting nexin 8
	SOCS3	ILMN_2156250	ENSG00000184557	suppressor of cytokine signaling 3
	SORBS1	ILMN_2326262	ENSG00000095637	sorbin and SH3 domain containing 1
	SORBS1	ILMN_1663446	ENSG00000095637	sorbin and SH3 domain containing 1
	SOS2	ILMN_1764414	ENSG00000100485	SOS Ras/Rho guanine nucleotide exchange factor 2
	SOX14	ILMN_1675364	ENSG00000168875	SRY-box transcription factor 14
	SOX6	ILMN_2287958	ENSG00000110693	SRY-box transcription factor 6
	SP5	ILMN_1775956	ENSG00000204335	Sp5 transcription factor
	SP6	ILMN_1769721	ENSG00000189120	Sp6 transcription factor
	SPACA9	ILMN_1813837	ENSG00000165698	sperm acrosome associated 9
	SPATA25	ILMN_1785476	ENSG00000149634	spermatogenesis associated 25
	SPEN	ILMN_1802611	ENSG00000065526	spen family transcriptional repressor
	SPINK6	ILMN_2149971	ENSG00000178172	serine peptidase inhibitor Kazal type 6
	SPIRE2	ILMN_1703284	ENSG00000204991	spire type actin nucleation factor 2
	SPNS1	ILMN_2281320	ENSG00000169682	SPNS lysolipid transporter 1, lysophospholipid
	SPNS1	ILMN_1681016	ENSG00000169682	SPNS lysolipid transporter 1, lysophospholipid
	SPOUT1	ILMN_1803317	ENSG00000198917	SPOUT domain containing methyltransferase 1
	SPR	ILMN_1705849	ENSG00000116096	sepiapterin reductase
	SPRR2G	ILMN_1702127	ENSG00000159516	small proline rich protein 2G
	SPRY2	ILMN_2089329	ENSG00000136158	sprouty RTK signaling antagonist 2
	SPSB2	ILMN_1787541	ENSG00000111671	splA/ryanodine receptor domain and SOCS box containing 2
	SPTLC1	ILMN_1799853	ENSG00000090054	serine palmitoyltransferase long chain base subunit 1
	SRCAP	ILMN_1750641	ENSG00000080603	Snf2 related CREBBP activator protein
	SRP68	ILMN_1703524	ENSG00000167881	signal recognition particle 68
	ST13	ILMN_1765204	ENSG00000100380	ST13 Hsp70 interacting protein
	ST13P7	ILMN_2080158	ENSG00000237821	ST13, Hsp70 interacting protein pseudogene 7
	ST3GAL3	ILMN_1699472	ENSG00000126091	ST3 beta-galactoside alpha-2,3-sialyltransferase 3
	ST7	ILMN_1746137	ENSG00000004866	suppression of tumorigenicity 7
	STAMBP	ILMN_1665521	ENSG00000124356	STAM binding protein
	STARD13	ILMN_2257607	ENSG00000133121	StAR related lipid transfer domain containing 13
	STBD1	ILMN_1673950	ENSG00000118804	starch binding domain 1
	STC2	ILMN_1691884	ENSG00000113739	stanniocalcin 2
	STK24	ILMN_1655163	ENSG00000102572	serine/threonine kinase 24
	STRN3	ILMN_1772946	ENSG00000196792	striatin 3
	STT3B	ILMN_2194448	ENSG00000163527	STT3 oligosaccharyltransferase complex catalytic subunit B
	STX11	ILMN_1720771	ENSG00000135604	syntaxin 11
	STX12	ILMN_1773901	ENSG00000117758	syntaxin 12
	SUDS3	ILMN_1757754	ENSG00000111707	SDS3 homolog, SIN3A corepressor complex component
	SUGT1P4-STRA6LP-CCDC180	ILMN_1793347	ENSG00000255036	SUGT1P4-STRA6LP-CCDC180 readthrough
	SULT2A1	ILMN_1692983	ENSG00000105398	sulfotransferase family 2A member 1
	SV2B	ILMN_1806306	ENSG00000185518	synaptic vesicle glycoprotein 2B
	SWT1	ILMN_1692834	ENSG00000116668	SWT1 RNA endoribonuclease homolog
	SYCP2L	ILMN_1779743	ENSG00000153157	synaptonemal complex protein 2 like
	SYN1	ILMN_1660693	ENSG00000008056	synapsin I
	SYNCRIP	ILMN_1727740	ENSG00000135316	synaptotagmin binding cytoplasmic RNA interacting protein
	SYNGR1	ILMN_1810875	ENSG00000100321	synaptogyrin 1
	SYT14P1	ILMN_2088673	ENSG00000215127	synaptotagmin 14 pseudogene 1
	SZRD1	ILMN_1707503	ENSG00000055070	SUZ RNA binding domain containing 1
	TACO1	ILMN_1685112	ENSG00000136463	translational activator of cytochrome c oxidase I
	TAF13	ILMN_2061318	ENSG00000197780	TATA-box binding protein associated factor 13
	TAF15	ILMN_2402131	ENSG00000270647	TATA-box binding protein associated factor 15
	TAS2R46	ILMN_1811572	ENSG00000226761	taste 2 receptor member 46
	TATDN1	ILMN_2179397	ENSG00000147687	TatD DNase domain containing 1
	TATDN3	ILMN_1744316	ENSG00000203705	TatD DNase domain containing 3
	TBCEL	ILMN_1776333	ENSG00000154114	tubulin folding cofactor E like
	TBCK	ILMN_1769601	ENSG00000145348	TBC1 domain containing kinase
	TCEA2	ILMN_2240597	ENSG00000171703	transcription elongation factor A2
	TCTN1	ILMN_1685124	ENSG00000204852	tectonic family member 1
	TDRD9	ILMN_2169490	ENSG00000156414	tudor domain containing 9
	TEAD3	ILMN_1814002	ENSG00000007866	TEA domain transcription factor 3
	TEKT4	ILMN_1727732	ENSG00000163060	tektin 4
	TERT	ILMN_1796005	ENSG00000164362	telomerase reverse transcriptase
	TEX19	ILMN_1730351	ENSG00000182459	testis expressed 19
	TFCP2	ILMN_1738750	ENSG00000135457	transcription factor CP2
	TG	ILMN_1747586	ENSG00000042832	thyroglobulin
	THG1L	ILMN_2093720	ENSG00000113272	tRNA-histidine guanylyltransferase 1 like
	THOC5	ILMN_1667883	ENSG00000100296	THO complex subunit 5
	THRA	ILMN_1654613	ENSG00000126351	thyroid hormone receptor alpha
	TLE1	ILMN_1751572	ENSG00000196781	TLE family member 1, transcriptional corepressor
	TLK2	ILMN_1663486	ENSG00000146872	tousled like kinase 2
	TLK2P1	ILMN_1663486	ENSG00000226049	tousled like kinase 2 pseudogene 1
	TLN2	ILMN_1700042	ENSG00000171914	talin 2
	TLR4	ILMN_1706217	ENSG00000136869	toll like receptor 4
	TMED2	ILMN_1654939	ENSG00000086598	transmembrane p24 trafficking protein 2
	TMED7	ILMN_2186482	ENSG00000134970	transmembrane p24 trafficking protein 7
	TMEM115	ILMN_1712035	ENSG00000126062	transmembrane protein 115
	TMEM139	ILMN_1683470	ENSG00000178826	transmembrane protein 139
	TMEM178A	ILMN_2104295	ENSG00000152154	transmembrane protein 178A
	TMEM183A	ILMN_1752589	ENSG00000163444	transmembrane protein 183A
	TMEM183AP3	ILMN_1752589	ENSG00000260382	TMEM183A pseudogene 3
	TMEM192	ILMN_2189859	ENSG00000170088	transmembrane protein 192
	TMEM230	ILMN_1806312	ENSG00000089063	transmembrane protein 230
	TMEM230	ILMN_2404539	ENSG00000089063	transmembrane protein 230
	TMEM245	ILMN_1788384	ENSG00000106771	transmembrane protein 245
	TMEM254	ILMN_1672717	ENSG00000133678	transmembrane protein 254
	TMEM259	ILMN_2326282	ENSG00000182087	transmembrane protein 259
	TMEM260	ILMN_1758093	ENSG00000070269	transmembrane protein 260
	TMEM41A	ILMN_1685602	ENSG00000163900	transmembrane protein 41A
	TMEM43	ILMN_1698605	ENSG00000170876	transmembrane protein 43
	TMEM52B	ILMN_1727606	ENSG00000165685	transmembrane protein 52B
	TMEM53	ILMN_1688041	ENSG00000126106	transmembrane protein 53
	TMEM54	ILMN_2059689	ENSG00000121900	transmembrane protein 54
	TMEM64	ILMN_2150402	ENSG00000180694	transmembrane protein 64
	TMEM80	ILMN_1689868	ENSG00000177042	transmembrane protein 80
	TMEM82	ILMN_1703648	ENSG00000162460	transmembrane protein 82
	TMEM86A	ILMN_1797021	ENSG00000151117	transmembrane protein 86A
	TMF1	ILMN_1661142	ENSG00000144747	TATA element modulatory factor 1
	TNFRSF10B	ILMN_1812915	ENSG00000120889	TNF receptor superfamily member 10b
	TNFRSF21	ILMN_1699695	ENSG00000146072	TNF receptor superfamily member 21
	TOM1	ILMN_2082314	ENSG00000100284	target of myb1 membrane trafficking protein
	TOMM70	ILMN_1746426	ENSG00000154174	translocase of outer mitochondrial membrane 70
	TP53I13	ILMN_1666178	ENSG00000167543	tumor protein p53 inducible protein 13
	TPPP2	ILMN_2196409	ENSG00000179636	tubulin polymerization promoting protein family member 2
	TPRX1	ILMN_1736536	ENSG00000178928	tetrapeptide repeat homeobox 1
	TRARG1	ILMN_1776852	ENSG00000184811	trafficking regulator of GLUT4 (SLC2A4) 1
	TREM1	ILMN_1688231	ENSG00000124731	triggering receptor expressed on myeloid cells 1
	TREX1	ILMN_1653896	ENSG00000213689	three prime repair exonuclease 1
	TRIM14	ILMN_1677542	ENSG00000106785	tripartite motif containing 14
	TRIM24	ILMN_1711247	ENSG00000122779	tripartite motif containing 24
	TRIM24	ILMN_2405031	ENSG00000122779	tripartite motif containing 24
	TRIM49	ILMN_2125451	ENSG00000168930	tripartite motif containing 49
	TRIM7	ILMN_1727364	ENSG00000146054	tripartite motif containing 7
	TRMT10A	ILMN_1741005	ENSG00000145331	tRNA methyltransferase 10A
	TRMT61B	ILMN_1706558	ENSG00000171103	tRNA methyltransferase 61B
	TRPV6	ILMN_1674533	ENSG00000165125	transient receptor potential cation channel subfamily V member 6
	TRRAP	ILMN_1660368	ENSG00000196367	transformation/transcription domain associated protein
	TSNARE1	ILMN_1781027	ENSG00000171045	t-SNARE domain containing 1
	TSPAN6	ILMN_2183856	ENSG00000000003	tetraspanin 6
	TTC23	ILMN_2319234	ENSG00000103852	tetratricopeptide repeat domain 23
	TTF1	ILMN_2128133	ENSG00000125482	transcription termination factor 1
	TTF2	ILMN_1810228	ENSG00000116830	transcription termination factor 2
	U2AF1L4	ILMN_1779177	ENSG00000161265	U2 small nuclear RNA auxiliary factor 1 like 4
	UBA1	ILMN_1720764	ENSG00000130985	ubiquitin like modifier activating enzyme 1
	UBALD2	ILMN_1775498	ENSG00000185262	UBA like domain containing 2
	UBE2D4	ILMN_1707084	ENSG00000078967	ubiquitin conjugating enzyme E2 D4 (putative)
	UBE2H	ILMN_1674633	ENSG00000186591	ubiquitin conjugating enzyme E2 H
	UBE2J2	ILMN_2387990	ENSG00000160087	ubiquitin conjugating enzyme E2 J2
	UBFD1	ILMN_1700811	ENSG00000103353	ubiquitin family domain containing 1
	UBL5	ILMN_2340065	ENSG00000198258	ubiquitin like 5
	UBR2	ILMN_1663489	ENSG00000024048	ubiquitin protein ligase E3 component n-recognin 2
	UBXN11	ILMN_2276987	ENSG00000158062	UBX domain protein 11
	UBXN8	ILMN_1731891	ENSG00000104691	UBX domain protein 8
	UGT1A1	ILMN_1744817	ENSG00000241635	UDP glucuronosyltransferase family 1 member A1
	UNC119	ILMN_1691291	ENSG00000109103	unc-119 lipid binding chaperone
	UNC5CL	ILMN_1745491	ENSG00000124602	unc-5 family C-terminal like
	UNC93A	ILMN_1746652	ENSG00000112494	unc-93 homolog A
	UQCRB	ILMN_2128489	ENSG00000156467	ubiquinol-cytochrome c reductase binding protein
	URB1-AS1	ILMN_1728403	ENSG00000256073	URB1 antisense RNA 1 (head to head)
	USE1	ILMN_1664243	ENSG00000053501	unconventional SNARE in the ER 1
	USP38	ILMN_1704876	ENSG00000170185	ubiquitin specific peptidase 38
	UTRN	ILMN_1655296	ENSG00000152818	utrophin
	VAMP4	ILMN_1761363	ENSG00000117533	vesicle associated membrane protein 4
	VAMP4	ILMN_1804676	ENSG00000117533	vesicle associated membrane protein 4
	VAV1	ILMN_1717334	ENSG00000141968	vav guanine nucleotide exchange factor 1
	VCX	ILMN_2366642	ENSG00000182583	variable charge X-linked
	VCX3A	ILMN_2366642	ENSG00000169059	variable charge X-linked 3A
	VDR	ILMN_1666203	ENSG00000111424	vitamin D receptor
	VEGFB	ILMN_1722855	ENSG00000173511	vascular endothelial growth factor B
	VEGFB	ILMN_1726981	ENSG00000173511	vascular endothelial growth factor B
	VIRMA	ILMN_1741841	ENSG00000164944	vir like m6A methyltransferase associated
	VPS13A	ILMN_1789828	ENSG00000197969	vacuolar protein sorting 13 homolog A
	VRK2	ILMN_1750088	ENSG00000028116	VRK serine/threonine kinase 2
	VSX1	ILMN_1680015	ENSG00000100987	visual system homeobox 1
	VWA8	ILMN_1688455	ENSG00000102763	von Willebrand factor A domain containing 8
	WDR3	ILMN_1711254	ENSG00000065183	WD repeat domain 3
	WDR33	ILMN_1670172	ENSG00000136709	WD repeat domain 33
	WDR38	ILMN_2077008	ENSG00000136918	WD repeat domain 38
	WFDC8	ILMN_1678425	ENSG00000158901	WAP four-disulfide core domain 8
	WFS1	ILMN_1759023	ENSG00000109501	wolframin ER transmembrane glycoprotein
	WLS	ILMN_1660549	ENSG00000116729	Wnt ligand secretion mediator
	WNT11	ILMN_1662188	ENSG00000085741	Wnt family member 11
	WTIP	ILMN_1801223	ENSG00000142279	WT1 interacting protein
	WWOX	ILMN_1660636	ENSG00000186153	WW domain containing oxidoreductase
	XCR1	ILMN_1764034	ENSG00000173578	X-C motif chemokine receptor 1
	XKR7	ILMN_1789691	ENSG00000260903	XK related 7
	XKRX	ILMN_1769071	ENSG00000182489	XK related X-linked
	YBX2	ILMN_1755354	ENSG00000006047	Y-box binding protein 2
	YWHAG	ILMN_2228809	ENSG00000170027	tyrosine 3-monooxygenase/tryptophan 5-monooxygenase activation protein gamma
	ZBED3	ILMN_1683215	ENSG00000132846	zinc finger BED-type containing 3
	ZBTB39	ILMN_1681154	ENSG00000166860	zinc finger and BTB domain containing 39
	ZBTB45	ILMN_1661484	ENSG00000119574	zinc finger and BTB domain containing 45
	ZBTB6	ILMN_1727218	ENSG00000186130	zinc finger and BTB domain containing 6
	ZC3H15	ILMN_2062112	ENSG00000065548	zinc finger CCCH-type containing 15
	ZC3H8	ILMN_1657837	ENSG00000144161	zinc finger CCCH-type containing 8
	ZDHHC9	ILMN_1748803	ENSG00000188706	zinc finger DHHC-type palmitoyltransferase 9
	ZER1	ILMN_1654032	ENSG00000160445	zyg-11 related cell cycle regulator
	ZFAND5	ILMN_1795228	ENSG00000107372	zinc finger AN1-type containing 5
	ZIC5	ILMN_1783881	ENSG00000139800	Zic family member 5
	ZMYND11	ILMN_1734783	ENSG00000015171	zinc finger MYND-type containing 11
	ZMYND15	ILMN_1672278	ENSG00000141497	zinc finger MYND-type containing 15
	ZNF195	ILMN_1688515	ENSG00000005801	zinc finger protein 195
	ZNF217	ILMN_1755303	ENSG00000171940	zinc finger protein 217
	ZNF264	ILMN_2350296	ENSG00000083844	zinc finger protein 264
	ZNF267	ILMN_1671010	ENSG00000185947	zinc finger protein 267
	ZNF317	ILMN_1680347	ENSG00000130803	zinc finger protein 317
	ZNF446	ILMN_1743767	ENSG00000083838	zinc finger protein 446
	ZNF460	ILMN_2110050	ENSG00000197714	zinc finger protein 460
	ZNF57	ILMN_1691333	ENSG00000171970	zinc finger protein 57
	ZNF596	ILMN_1725679	ENSG00000172748	zinc finger protein 596
	ZNF655	ILMN_1769673	ENSG00000197343	zinc finger protein 655
	ZNF682	ILMN_2242998	ENSG00000197124	zinc finger protein 682
	ZNF777	ILMN_1749583	ENSG00000196453	zinc finger protein 777
	ZNF829	ILMN_2157843	ENSG00000185869	zinc finger protein 829
	ZNF93	ILMN_1724158	ENSG00000184635	zinc finger protein 93
	AADAT	ILMN_2270015	ENSG00000109576	aminoadipate aminotransferase
	AANAT	ILMN_1729835	ENSG00000129673	aralkylamine N-acetyltransferase
		ILMN_1760121	ENSG00000273637	novel transcript
		ILMN_2205245	ENSG00000289554	novel transcript, sense intronic to GPN2
		ILMN_2211922	ENSG00000291067	novel transcript
		ILMN_1809931	ENSG00000289316	novel transcript
		ILMN_1773395	ENSG00000258311	novel protein
		ILMN_2355971	ENSG00000233250	novel transcript
		ILMN_2088673	ENSG00000293343	novel transcript
		ILMN_1699472	ENSG00000284989	novel transcript
		ILMN_1666169	ENSG00000267681	high mobility group nucleosome binding domain 1 (HMGN1) pseudogene
		ILMN_1727364	ENSG00000248514	novel transcript
		ILMN_1791423	ENSG00000206567	novel transcript
		ILMN_1790562	ENSG00000238231	interferon-induced transmembrane protein pseudogene
		ILMN_1681741	ENSG00000273367	novel transcript
		ILMN_2099783	ENSG00000226138	ATPase, H+ transporting, lysosomal 14kDa, V1 subunit F (ATP6V1F) pseudogene
		ILMN_2281320	ENSG00000261067	novel transcript
		ILMN_1700811	ENSG00000260751	novel transcript
		ILMN_1769673	ENSG00000272647	novel protein
		ILMN_1732641	ENSG00000278218	None
		ILMN_1737685	ENSG00000286235	novel protein
		ILMN_2047618	ENSG00000276289	potassium channel, voltage gated subfamily E regulatory beta subunit 1B
		ILMN_2206722	ENSG00000293413	novel transcript
		ILMN_1685112	ENSG00000288894	novel protein
		ILMN_2174875	ENSG00000280571	novel protein
		ILMN_2118621	ENSG00000256407	novel transcript
		ILMN_1775615	ENSG00000206549	novel protein identical to PRSS50
		ILMN_1681160	ENSG00000291124	novel transcript
		ILMN_1709611	ENSG00000256206	novel protein
		ILMN_1749662	ENSG00000290318	novel protein
		ILMN_2153029	ENSG00000268669	neurotrophin 4 (NTF4) pseudogene
		ILMN_2294978	ENSG00000259171	novel protein, ANG-RNASE4 readthrough
		ILMN_1739558	ENSG00000288550	novel protein
		ILMN_1750641	ENSG00000282034	novel transcript
		ILMN_1691641	ENSG00000285547	novel protein
		ILMN_1691927	ENSG00000259767	novel transcript, sense intronic to BTBD1
		ILMN_2372241	ENSG00000293154	novel transcript
		ILMN_1708886	ENSG00000273171	novel protein, readthrough between VTN and SEBOX
		ILMN_1717252	ENSG00000293402	novel transcript
		ILMN_1698144	ENSG00000289697	novel protein
		ILMN_2408572	ENSG00000259171	novel protein, ANG-RNASE4 readthrough
		ILMN_2190486	ENSG00000290711	novel transcript
		ILMN_1746652	ENSG00000216966	novel pseudogene
		ILMN_1770895	ENSG00000290849	novel transcript
		ILMN_1660693	ENSG00000283743	novel transcript
		ILMN_2412192	ENSG00000289697	novel protein
		ILMN_1807533	ENSG00000265303	novel protein
		ILMN_1681016	ENSG00000261067	novel transcript
		ILMN_2382724	ENSG00000267168	novel protein

## Sheet: Unique Genes
ABCB7
ABCC10
ABCC5
ABCC9
ABCF2-H2BK1
ABHD12
ABHD17B
ABHD5
ACAT1
ACOX1
ACSBG1
ACSF3
ACSL3
ACSL4
ACSM2B
ACSS2
ACTN2
ACVR1C
ADAMTSL1
ADGRG1
ADH5
ADHFE1
ADK
ADPGK
AGFG1
AGO3
AGXT
AIG1
AKAP12
AKAP9
ALDH1A1
ALDH2
ALDH4A1
ANG
ANGPTL6
ANK2
ANK3
ANKEF1
ANKRD17
ANO5
ANO6
ANO8
ANTXR2
ANXA1
ANXA2
ANXA6
AOC1
AP3D1
APMAP
APOBEC3F
APOL6
APPL1
AQP7
ARF1
ARHGAP10
ARHGAP21
ARHGAP24
ARHGAP42
ARHGAP6
ARHGEF15
ARIH1
ARK2N
ARMC9
ARPP19
ARSA
ARSB
ARSG
AS3MT
ASAH1
ASB10
ASPH
ATE1
ATF2
ATP5MF
ATP6V1F
ATP7B
ATP9B
ATPAF1
ATRIP
AURKC
AXDND1
B3GNT8
B4GALT6
BAG4
BAIAP2
BCAP31
BCAS1
BCL2L1
BCL6
BDH1
BDNF
BEND4
BEX3
BFAR
BORCS5
BORCS7-ASMT
BPNT2
BRAT1
BRCA1
BRDT
BRI3BP
BRINP3
BSDC1
BSND
BTBD1
BUD13
C19orf12
C1QTNF8
C2orf49
C3orf22
C3orf38
C4orf19
C9orf72
CACNA1G
CACNG4
CACNG6
CACNG8
CALML3
CAPN7
CAPRIN1
CAPSL
CARTPT
CASP4
CASZ1
CAT
CATSPERE
CBARP
CBFB
CBLC
CBR1
CCDC113
CCDC13
CCDC142
CCDC180
CCDC186
CCDC51
CCDC61
CCDC62
CCDC73
CCER1
CCL18
CCNC
CCNE1
CCT6P1
CCT7
CD164
CD302
CD8B
CD99
CDC25A
CDC42
CDC42EP1
CDC42SE2
CDCP2
CDK1
CDK2
CDKL5
CDKN2B
CERCAM
CERT1
CFAP20
CFAP221
CFAP251
CFAP46
CFAP70
CFAP74
CFH
CGB3
CGB5
CHCHD3
CHEK1
CHID1
CHMP2B
CHP1
CHPF2
CHRM2
CHTF8
CIC
CILK1
CIPC
CITED1
CLDN8
CLDND2
CLEC18C
CLINT1
CLIP4
CLK3
CLPX
CLU
CNFN
CNTFR
CNTN5
CNTN6
CNTNAP5
COA6
COBLL1
COL25A1
COL4A1
COL4A2
COMT
COPS7B
COX6B2
CPED1
CPM
CPN2
CPNE6
CPSF7
CRAT
CRELD1
CRHR1
CRISP2
CRK
CRLS1
CRYAB
CRYM
CSAG2
CSAG3
CSDE1
CSMD3
CSNK2A1
CST6
CST9
CSTPP1
CT45A10
CTSE
CTSF
CUEDC2
CYB561A3
CYB5A
CYB5R1
CYP46A1
CYP4F3
DAP3
DCDC1
DCLRE1C
DCUN1D4
DDC
DDHD1
DDHD2
DDT
DDX42
DDX49
DEFB125
DENND2B
DENND2D
DERPC
DHCR24
DHRS4L2
DHX40
DLD
DLEU7
DLG1
DLG3
DMAC2L
DNAJC11
DNAJC21
DNAJC3
DND1
DPH3
DPM1
DPP8
DPY19L4
DRAXIN
DRD3
DSC2
DTD2
DTNB
DTX1
DUSP22
DUSP29
DYNC2LI1
DYRK1A
EAF1
EBLN2
ECHDC3
EFHB
EGLN1
EGR3
EIF1AX
EIF1AXP1
EIF4G2
ELF1
ELP4
EMP1
EPB41L4B
EPB41L5
EPCAM
EPHA6
EPHX1
EPPIN
ERGIC1
ERLIN2
ERMAP
ERRFI1
ESYT1
EXD2
EXOG
EXT2
EYA2
EYA3
FABP1
FABP2
FAM13A
FAM171B
FAM178B
FAM222A
FAM227B
FAM241A
FAM47E-STBD1
FAM83B
FAM91A1
FANCD2OS
FBN3
FBXL16
FBXL17
FBXL21P
FBXO15
FBXO3
FCHO1
FEM1B
FEM1C
FER1L4
FGA
FGB
FGF1
FGFRL1
FGL1
FHL1
FIGNL1
FLT4
FMNL2
FMOD
FN1
FNBP1L
FNTA
FOXJ3
FOXK2
FREM1
FRMD1
FSBP
FSIP2
FXR1
FZD5
FAAH
G6PC2
GABARAPL1
GABPAP
GABRB2
GABRE
GADD45A
GALC
GALE
GALNTL6
GATA1
GATB
GCDH
GCK
GCLM
GCNT3
GDPD2
GFER
GFPT1
GGT3P
GGTLC1
GID4
GJA1
GLB1L
GLRB
GLYAT
GNA12
GNAI3
GNAQ
GNRH2
GOSR1
GPC3
GPC5
GPC6
GPN2
GPR27
GPX1
GPX1P1
GRIK2
GRIN3A
GRM5
GTF2E2
GTF2I
GUCA1C
GYG2
H1-7
H2AC18
H2AC19
H2AJ
H2BC5
H2BC6
H2BK1
H3-4
H3C1
H4C13
HACE1
HAPLN2
HARS1
HAUS8
HDAC5
HILPDA
HIPK1
HIPK3
HK1
HMGCL
HMGN2P46
HNMT
HNRNPA1P16
HOGA1
HOXB1
HPN
HPS5
HSD17B10
HTR3A
HTR5A
HYDIN
HYDIN2
HYPK
ICE2
IFNW1
IGFLR1
IKZF5
IL11
IL17RE
IL18BP
IL1RL1
IL27RA
ILK
IMPG2
INHBA
IRF7
IRGQ
IRS2
IRX2-DT
ISCU
ISX
ITGAD
ITGB1BP1
ITPKA
ITSN1
JADE1
JAK1
JAKMIP2
JRKL
KANK1
KCNE1
KCNIP2
KCNIP3
KCNJ5
KCTD3
KERA
KIF19
KIAA1191
KLF6
KLHDC7B
KRTAP19-3
KTI12
KY
KYAT1
LAMB2
LAMP2
LAPTM4A
LAT
LCE3E
LENG8
LEP
LEPR
LGALS8
LHFPL3
LHPP
LIAS
LIMCH1
LINC00336
LINC00477
LINC00602
LINC01366
LINC02210-CRHR1
LINC02875
LIPE
LNPEP
LOX
LPGAT1
LPL
LPO
LRPAP1
LRRC41
LRRC66
LSM10
LSM14B
LSP1
LSS
LY6D
LYPD1
M1AP
MACO1
MACROD1
MAD2L1BP
MAEA
MAGEA8
MAGI2
MAGOH
MAL2
MAN1A1
MAP1LC3B
MAP4K3
MAP4K5
MAPK10
MAPK15
MAPT
MARK3
MASP1
MAST2
MATR3
MBTPS1
MCL1
MCPH1
MDFIC
MED13L
MED7
METTL23
METTL9
MGST1
MID1
MID2
MINDY2
MINDY3
MIR22HG
MIR3620
MIR5006
MIR671
MIR6836
MIR935
MIR99AHG
MLNR
MMD
MMP1
MMP16
MMP26
MOCS1
MPL
MPLKIP
MPRIP
MPST
MRNIP
MRPL1
MRPL2
MRPL3
MRPL35
MRPL39
MRPL53
MRPS12
MRPS26
MRPS27
MRPS30
MSH5
MSRB2
MTARC1
MTARC2
MTERF4
MTHFD1
MTRR
MTX1
MTX1P1
MUC2
MUSK
MUTYH
MXI1
MYADM
MYADML
MYC
MYMK
MYO19
MZT1
NACC2
NAGLU
NANOS1
NARS1
NASP
NAT8
NBR2
NDRG1
NDUFAF3
NECTIN1
NEDD4L
NEDD9
NEIL3
NEK11
NEK7
NEU3
NEUROD2
NFAM1
NHLRC3
NHLRC4
NKD1
NKIRAS1
NKIRAS2
NKX2-3
NLRP5
NLRX1
NOCT
NOM1
NOTCH2
NPR1
NR2C1
NR2E1
NSL1
NT5C3B
NTF6A
NTM
NTRK2
NUDT8
NUTM1
NAA50
ODF1
ODF2L
OPCML
OPRM1
OR10AG1
OR2A14
OR2A5
OR2AK2
OR4A15
OR4C13
OR4M2
OR4M2B
OR52B6
OR52E2
OR52L1
OR5AN1
OR5C1
OR5K1
OR5M11
OR6K6
OR8G5
ORMDL3
OSBP
OTUB2
P2RY2
P2RY6
PADI6
PAIP2
PALM
PAPOLG
PARK7
PAX8
PAXBP1
PBLD
PBX1
PCCA
PCDH11X
PCDH11Y
PCDH9
PCDHA3
PCDHGA11
PCDHGA3
PCNX1
PCOLCE2
PCYT1B
PDE7A
PDE8A
PDZD2
PDZRN3
PEA15
PECR
PEG10
PELO
PEX11A
PEX19
PFKFB3
PGM1
PHKA1
PHKB
PHOSPHO1
PIAS2
PIGK
PIGP
PIGS
PIK3C3
PIK3R1
PIPOX
PITPNC1
PIWIL2
PJA1
PLA2G5
PLAC1
PLAC4
PLEKHG5
PLOD2
PLAAT3
PNMA6A
POFUT2
POLR2L
POU3F4
POU4F1
PPA1
PPA2
PPFIA1
PPP2R1B
PPP2R2C
PPP4R2
PPP6C
PRAMEF5
PREX2
PRKACB
PRKCQ
PRKN
PROKR2
PRPF40B
PRPS2
PRR34
PRSS50
PRSS55
PRXL2C
PSG2
PSMA1
PSMA8
PSMB5
PSMD12
PSPC1
PTCD1
PTCD2
PTCHD4
PTGER3
PTGS1
PTPN4
PTPRA
PTPRS
PTPRZ1
PUM1
PYGB
QKI
QPCT
R3HDM1
RAB1A
RABL3
RAD51D
RAD54B
RANBP3L
RANBP6
RAPSN
RARRES2
RASA3
RASGEF1C
RBFA
RBFOX1
RBM15B
RBM33
RBP4
RBPMS
RDH5
REEP2
REN
REXO5
RFFL
RFTN1
RGS3
RHBDD1
RHOA
RIC8B
RIDA
RIMS4
RIN1
RLN3
RN7SL775P
RNASE13
RNASE4
RNF121
RNF141
RNF151
RNF214
RNF217
RNF6
RNFT2
RPGR
RPP25L
RRAGC
RRAS2
RRAS2P1
RRP7A
RSPO2
RSPO3
RTCA
RTEL1
RTEL1-TNFRSF6B
RTL3
RTN4
RYR1
S100A2
S100A5
S100A7L2
S100G
SAR1B
SASH1
SBNO1
SCML1
SCN1B
SCN2A
SCN3A
SCN3B
SCYL1
SDE2
SDR42E1
SDSL
SEBOX
SEC14L3
SECISBP2L
SEMA3B
SENP2
SEPHS2
SEPTIN4
SERF2
SERHL
SERPINB1
SERPINF1
SGCB
SGO2
SHISA6
SHMT1
SHOC2
SIGMAR1
SIL1
SIMC1
SIRPG
SKA2
SKP2
SLC10A3
SLC12A4
SLC19A3
SLC20A2
SLC25A23
SLC25A24
SLC26A1
SLC26A7
SLC2A12
SLC31A2
SLC35A3
SLC35D3
SLC35F3
SLC35F5
SLC38A5
SLC38A8
SLC39A10
SLC44A4
SLC5A10
SLC5A11
SLC5A12
SLC6A20
SLC7A2
SLX9
SMG8
SMPD1
SNCB
SNN
SNORC
SNORD97
SNRNP35
SNTG1
SNU13
SNX7
SNX8
SOCS3
SORBS1
SOS2
SOX14
SOX6
SP5
SP6
SPACA9
SPATA25
SPEN
SPINK6
SPIRE2
SPNS1
SPOUT1
SPR
SPRR2G
SPRY2
SPSB2
SPTLC1
SRCAP
SRP68
ST13
ST13P7
ST3GAL3
ST7
STAMBP
STARD13
STBD1
STC2
STK24
STRN3
STT3B
STX11
STX12
SUDS3
SUGT1P4-STRA6LP-CCDC180
SULT2A1
SV2B
SWT1
SYCP2L
SYN1
SYNCRIP
SYNGR1
SYT14P1
SZRD1
TACO1
TAF13
TAF15
TAS2R46
TATDN1
TATDN3
TBCEL
TBCK
TCEA2
TCTN1
TDRD9
TEAD3
TEKT4
TERT
TEX19
TFCP2
TG
THG1L
THOC5
THRA
TLE1
TLK2
TLK2P1
TLN2
TLR4
TMED2
TMED7
TMEM115
TMEM139
TMEM178A
TMEM183A
TMEM183AP3
TMEM192
TMEM230
TMEM245
TMEM254
TMEM259
TMEM260
TMEM41A
TMEM43
TMEM52B
TMEM53
TMEM54
TMEM64
TMEM80
TMEM82
TMEM86A
TMF1
TNFRSF10B
TNFRSF21
TOM1
TOMM70
TP53I13
TPPP2
TPRX1
TRARG1
TREM1
TREX1
TRIM14
TRIM24
TRIM49
TRIM7
TRMT10A
TRMT61B
TRPV6
TRRAP
TSNARE1
TSPAN6
TTC23
TTF1
TTF2
U2AF1L4
UBA1
UBALD2
UBE2D4
UBE2H
UBE2J2
UBFD1
UBL5
UBR2
UBXN11
UBXN8
UGT1A1
UNC119
UNC5CL
UNC93A
UQCRB
URB1-AS1
USE1
USP38
UTRN
VAMP4
VAV1
VCX
VCX3A
VDR
VEGFB
VIRMA
VPS13A
VRK2
VSX1
VWA8
WDR3
WDR33
WDR38
WFDC8
WFS1
WLS
WNT11
WTIP
WWOX
XCR1
XKR7
XKRX
YBX2
YWHAG
ZBED3
ZBTB39
ZBTB45
ZBTB6
ZC3H15
ZC3H8
ZDHHC9
ZER1
ZFAND5
ZIC5
ZMYND11
ZMYND15
ZNF195
ZNF217
ZNF264
ZNF267
ZNF317
ZNF446
ZNF460
ZNF57
ZNF596
ZNF655
ZNF682
ZNF777
ZNF829
ZNF93
AADAT
AANAT

## Sheet: Reactome
Term	Overlap	P-value	Adjusted p-value	Odds Ratio	Combined Score	Genes
Glycosphingolipid Metabolism R-HSA-1660662	10/45	9.26159e-05	0.0693075	5.18066	48.113	GALC;NEU3;ARSA;ASAH1;NAT8;GLB1L;SMPD1;ARSG;ESYT1;ARSB
Muscle Contraction R-HSA-397014	24/196	0.000104694	0.0693075	2.54594	23.3321	RYR1;NANOS1;KCNE1;ANXA1;ANXA2;ACTN2;NPR1;KCNIP2;KCNIP3;ABCC9;SORBS1;HIPK1;CACNA1G;CACNG6;CACNG8;ALDH2;ASPH;AKAP9;ANXA6;SCN3B;SCN2A;SCN3A;SCN1B;CACNG4
Sphingolipid Metabolism R-HSA-428157	14/89	0.000218701	0.0965202	3.39054	28.5748	ARSA;ASAH1;GALC;NEU3;SPTLC1;NAT8;GLB1L;SMPD1;OSBP;ORMDL3;ARSG;ESYT1;CERT1;ARSB
Cardiac Conduction R-HSA-5576891	17/126	0.000329373	0.109023	2.83594	22.7395	NANOS1;RYR1;KCNE1;NPR1;KCNIP2;KCNIP3;ABCC9;HIPK1;CACNG6;CACNG8;ASPH;AKAP9;SCN3B;SCN2A;SCN3A;SCN1B;CACNG4
Metabolism R-HSA-1430728	141/2049	0.000500374	0.118748	1.38067	10.4933	PECR;LPGAT1;MTRR;TACO1;CPNE6;CCNC;HNMT;CYP46A1;COMT;LIPE;AS3MT;NAGLU;PPP2R1B;OSBP;GYG2;PRKACB;SEPHS2;SULT2A1;ARSA;MUSK;PIPOX;PHKA1;KERA;ACSL4;HOGA1;ACSL3;MED7;RBP4;PHOSPHO1;MTHFD1;PPA2;PPA1;ISCU;GCDH;PSMD12;RTEL1;PFKFB3;SLC26A1;UQCRB;MTARC2;ABCB7;SAR1B;MTARC1;SHMT1;PEX11A;MGST1;LPL;PLA2G5;PIK3R1;GLYAT;ABHD5;SDSL;LIAS;ADH5;NEU3;AANAT;SLC19A3;ARSG;CERT1;ARSB;ATP5MF;LHPP;ST3GAL3;DMAC2L;MPST;VDR;ADHF…
Glycogen Breakdown (Glycogenolysis) R-HSA-70221	5/14	0.000538134	0.118748	10.0392	75.5693	PYGB;PHKA1;PHKB;GYG2;PGM1
Metabolism Of Lipids R-HSA-556833	59/732	0.000765883	0.127826	1.6117	11.5631	PECR;LPGAT1;SLC44A4;CPNE6;HILPDA;CCNC;CYP46A1;LIPE;SPTLC1;SMPD1;OSBP;PRKACB;SULT2A1;ARSA;CBR1;PCYT1B;GPX1;MUSK;ACSL4;PLAAT3;ACSL3;MED7;PHOSPHO1;BDH1;PCCA;ACOX1;ACSBG1;PIK3C3;AGXT;TNFRSF21;ASAH1;SAR1B;PEX11A;PLA2G5;ABHD5;PIK3R1;PTGS1;NEU3;HMGCL;ORMDL3;ARSG;CERT1;ARSB;MBTPS1;VDR;CYP4F3;DDHD2;DHCR24;DDHD1;ACSF3;CRLS1;MED13L;FABP1;GALC;FABP2;NAT8;GLB1L;ESYT1;CRAT
Phase 2 - Plateau Phase R-HSA-5576893	5/15	0.000772363	0.127826	9.03483	64.7441	CACNG6;KCNE1;CACNG8;AKAP9;CACNG4
Phase 0 - Rapid Depolarisation R-HSA-5576892	7/32	0.0011606	0.170737	5.06516	34.2345	CACNG6;CACNG8;SCN3B;SCN2A;SCN3A;CACNG4;SCN1B
MAPK Family Signaling Cascades R-HSA-5683057	30/318	0.00149683	0.19818	1.89995	12.358	PSMD12;IRS2;PIK3R1;FGF1;PSMA8;CDC42;PSMB5;PPP2R1B;FNTA;MYC;PEA15;SHOC2;PRKACB;MARK3;JAK1;FGB;FGA;ACTN2;FN1;DLG1;AGO3;PSMA1;ZDHHC9;RASA3;ABHD17B;PTPRA;SPNS1;CDK1;PRKCQ;BCL2L1
Ethanol Oxidation R-HSA-71384	4/11	0.00187126	0.219882	10.3173	64.8045	ACSS2;ALDH2;ALDH1A1;ADH5
Metabolism Of Carbohydrates R-HSA-71387	27/285	0.00236625	0.219882	1.90626	11.5261	PRPS2;PYGB;PFKFB3;SLC26A1;ADPGK;PPP2R1B;NAGLU;GPC3;GPC5;MAP4K5;GYG2;PRKACB;GPC6;ARSB;PGM1;ST3GAL3;CHPF2;ABCC5;PHKA1;KERA;PHKB;G6PC2;GALE;GLB1L;ALDH1A1;FMOD;B4GALT6
G0 And Early G1 R-HSA-1538133	6/27	0.00239463	0.219882	5.16469	31.1664	CCNE1;MYC;CDK2;DYRK1A;CDK1;CDC25A
RAS Processing R-HSA-9648002	5/19	0.00250843	0.219882	6.45209	38.6357	ABHD17B;FNTA;ZDHHC9;PRKCQ;BCL2L1
Biological Oxidations R-HSA-211859	22/218	0.00267464	0.219882	2.04142	12.0933	AOC1;MTRR;SLC26A1;ACSS2;MTARC2;UGT1A1;MTARC1;CYP4F3;EPHX1;MGST1;GLYAT;COMT;CYP46A1;ADH5;ACSM2B;PTGS1;AS3MT;ALDH2;ALDH1A1;BPNT2;GCLM;SULT2A1
Lysine Catabolism R-HSA-71064	4/12	0.00269061	0.219882	9.02717	53.4227	GCDH;AADAT;PIPOX;CRYM
Early SARS-CoV-2 Infection Events R-HSA-9772572	7/37	0.00282326	0.219882	4.21985	24.77	MAP1LC3B;CHMP2B;GPC3;GPC5;PIK3C3;GPC6;ISCU
MAPK1/MAPK3 Signaling R-HSA-5684996	26/277	0.00319559	0.235054	1.88572	10.8353	PSMD12;IRS2;PIK3R1;FGF1;PSMA8;PSMB5;PPP2R1B;FNTA;PEA15;SHOC2;MARK3;JAK1;FGB;FGA;ACTN2;FN1;DLG1;PSMA1;ZDHHC9;RASA3;ABHD17B;PTPRA;SPNS1;CDK1;PRKCQ;BCL2L1
Interaction Between L1 And Ankyrins R-HSA-445095	6/29	0.00351285	0.24479	4.71509	26.6465	ANK2;ANK3;SCN3B;SCN2A;SCN3A;SCN1B
HS-GAG Degradation R-HSA-2024096	5/21	0.00402184	0.266246	5.64498	31.1378	GLB1L;NAGLU;GPC3;GPC5;GPC6
RHOA GTPase Cycle R-HSA-8980692	16/147	0.00467689	0.283916	2.21614	11.8899	BCAP31;STARD13;ARHGEF15;PLEKHG5;FAM13A;MACO1;PIK3R1;ARHGAP6;ARHGAP24;RHOA;VAV1;PREX2;ARHGAP21;ARHGAP10;ARHGAP42;STBD1
RAF/MAP Kinase Cascade R-HSA-5673001	25/271	0.00473601	0.283916	1.84874	9.89551	PSMD12;IRS2;PIK3R1;FGF1;PSMA8;PSMB5;PPP2R1B;FNTA;PEA15;SHOC2;MARK3;JAK1;FGB;FGA;ACTN2;FN1;DLG1;PSMA1;ZDHHC9;RASA3;ABHD17B;PTPRA;SPNS1;PRKCQ;BCL2L1
Signaling By BRAF And RAF1 Fusions R-HSA-6802952	9/62	0.00493208	0.283916	3.07319	16.3248	FGB;FXR1;FGA;MPRIP;AKAP9;TRIM24;FN1;MARK3;QKI
CDC42 GTPase Cycle R-HSA-9013148	16/149	0.00533035	0.294058	2.18258	11.4244	STARD13;ARHGEF15;ITSN1;KCTD3;PIK3R1;FNBP1L;BAIAP2;ARHGAP24;PREX2;CDC42;ARHGAP21;ARHGAP10;ARHGAP42;FMNL2;CDC42EP1;CDC42SE2
Triglyceride Catabolism R-HSA-163560	5/23	0.00609471	0.304743	5.01723	25.5895	FABP1;FABP2;LIPE;ABHD5;PRKACB
RHO GTPase Cycle R-HSA-9012999	36/441	0.00623661	0.304743	1.62063	8.22844	ITSN1;FAM13A;PIK3R1;FNBP1L;ARHGAP6;PREX2;CDC42;AKAP12;ARHGAP21;GJA1;ARHGAP42;STBD1;CCT7;FAM83B;BCAP31;STARD13;CPSF7;MTX1;ARHGEF15;PLEKHG5;RRAS2;MACO1;VRK2;KCTD3;FAM91A1;BAIAP2;RHOA;VAV1;ARHGAP24;ARHGAP10;FMNL2;UBXN11;CDC42EP1;ESYT1;SOS2;CDC42SE2
Diseases Associated With Glycosylation Precursor Biosynthesis R-HSA-5609975	4/15	0.00653841	0.304743	6.56417	33.0182	DPM1;GALE;GFPT1;PGM1
p130Cas Linkage To MAPK Signaling For Integrins R-HSA-372708	4/15	0.00653841	0.304743	6.56417	33.0182	FGB;FGA;FN1;CRK
Defective ST3GAL3 Causes MCT12 And EIEE15 R-HSA-3656243	3/8	0.00667489	0.304743	10.824	54.2218	KERA;FMOD;ST3GAL3
Glycogen Metabolism R-HSA-8982491	5/24	0.00737061	0.315955	4.75291	23.338	PYGB;PHKA1;PHKB;GYG2;PGM1
Signal Transduction R-HSA-162582	156/2465	0.00762718	0.315955	1.25317	6.11049	CHRM2;TRRAP;ITSN1;FAM13A;H2AC19;CCNC;IRS2;TTF2;FNBP1L;FGF1;FGFRL1;PREX2;ABHD12;GJA1;ARHGAP42;RGS3;FNTA;PPP2R1B;MYC;CHEK1;SOX6;PRKACB;PDE8A;WLS;TLE1;ACTN2;VRK2;KCTD3;FAM91A1;SGO2;RRAGC;COL4A2;CCNE1;COL4A1;SPNS1;PRKCQ;NOTCH2;BEX3;PSMD12;CBFB;HPN;TAS2R46;NEDD4L;DTX1;PIK3R1;RTN4;CRHR1;SKA2;SOCS3;ARHGAP21;BAG4;PDZD2;TERT;DRD3;MARK3;FAM83B;ST3GAL3;ATP6V1F;STARD13;CPSF7;EGR3;XCR1;FN1;TNFRSF10B;MACO1;INH…
Oncogenic MAPK Signaling R-HSA-6802957	10/78	0.00763637	0.315955	2.66186	12.9761	FGB;FXR1;FGA;MPRIP;AKAP9;TRIM24;FN1;SHOC2;MARK3;QKI
Platelet Activation, Signaling And Aggregation R-HSA-76002	23/254	0.00814859	0.326931	1.80922	8.70219	CHID1;FGB;FGA;ACTN2;RARRES2;FN1;GNAI3;VEGFB;MPL;PIK3R1;TTF2;CLU;RHOA;VAV1;ABHD12;CDC42;CYB5R1;GNAQ;LAMP2;GNA12;SPNS1;PRKCQ;CRK
Multifunctional Anion Exchangers R-HSA-427601	3/9	0.00962346	0.364042	9.01952	41.8826	SLC26A1;SLC26A7;SLC5A12
PI3K/AKT Activation R-HSA-198203	3/9	0.00962346	0.364042	9.01952	41.8826	IRS2;PIK3R1;RHOA
Platelet Aggregation (Plug Formation) R-HSA-76009	6/36	0.0105387	0.378126	3.61356	16.4515	FGB;FGA;MPL;FN1;TTF2;CRK
Glycosaminoglycan Metabolism R-HSA-1630316	13/120	0.010567	0.378126	2.20093	10.0143	SLC26A1;CHPF2;ABCC5;KERA;NAGLU;GLB1L;GPC3;GPC5;B4GALT6;FMOD;GPC6;ARSB;ST3GAL3
Cleavage Of Damaged Purine R-HSA-110331	6/37	0.012032	0.419221	3.49681	15.4565	H2AJ;NEIL3;H3-4;H2BC5;H2AC19;MUTYH
Formation Of beta-catenin:TCF Transactivating Complex R-HSA-201722	8/60	0.0129454	0.437429	2.78174	12.0923	H2AJ;TLE1;H3-4;TERT;H2BC5;TRRAP;MYC;H2AC19
MASTL Facilitates Mitotic Progression R-HSA-2465910	3/10	0.0132154	0.437429	7.73061	33.4455	PPP2R1B;CDK1;ARPP19
Signaling By Rho GTPases, Miro GTPases And RHOBTB3 R-HSA-9716542	48/660	0.0148696	0.48018	1.43088	6.02179	ITSN1;FAM13A;H2AC19;PIK3R1;FNBP1L;ARHGAP6;SKA2;PREX2;CDC42;AKAP12;ARHGAP21;GJA1;ARHGAP42;PDZD2;PPP2R1B;STBD1;CCT7;FAM83B;YWHAG;BCAP31;STARD13;CPSF7;H2BC5;MTX1;ARHGEF15;PLEKHG5;RRAS2;MACO1;VRK2;KCTD3;FAM91A1;BAIAP2;MYO19;LRRC41;RHOA;VAV1;ARHGAP24;SGO2;ARHGAP10;H2AJ;FMNL2;UBXN11;CCNE1;CDC42EP1;PIK3C3;ESYT1;SOS2;CDC42SE2
RHOG GTPase Cycle R-HSA-9013408	9/74	0.0153853	0.481865	2.50424	10.4536	CDC42;ARHGAP21;STBD1;ITSN1;CDC42EP1;VRK2;PIK3R1;ESYT1;VAV1
RAC2 GTPase Cycle R-HSA-9013404	10/87	0.0159318	0.481865	2.34962	9.72609	CDC42;ARHGAP21;ARHGAP42;MTX1;STBD1;CDC42EP1;VRK2;PIK3R1;ESYT1;VAV1
Cristae Formation R-HSA-8949613	5/29	0.0165821	0.481865	3.76173	15.4209	DMAC2L;CHCHD3;MTX1;DNAJC11;ATP5MF
Class I MHC Mediated Antigen Processing And Presentation R-HSA-983169	30/378	0.0168569	0.481865	1.56731	6.39933	PRKN;PSMD12;UBE2D4;SAR1B;NEDD4L;UBR2;RNF6;UBE2J2;PSMA8;SEC14L3;SOCS3;PSMB5;BTBD1;ASB10;RNF217;SKP2;FGB;FGA;UBE2H;HACE1;FBXO15;LNPEP;FBXL16;LRRC41;PJA1;SPSB2;PSMA1;UBA1;PIK3C3;TLR4
Diseases Associated With Glycosaminoglycan Metabolism R-HSA-3560782	6/40	0.0173936	0.481865	3.18776	12.9157	GPC3;GPC5;KERA;FMOD;GPC6;ST3GAL3
Free Fatty Acids Regulate Insulin Secretion R-HSA-400451	3/11	0.0174694	0.481865	6.76393	27.3757	GNAQ;ACSL4;ACSL3
Signaling By Leptin R-HSA-2586552	3/11	0.0174694	0.481865	6.76393	27.3757	SOCS3;LEP;IRS2
FGFR1 Mutant Receptor Activation R-HSA-1839124	5/30	0.0190588	0.500914	3.61107	14.3006	BAG4;TRIM24;PIK3R1;ERLIN2;FGF1
Phase I - Functionalization Of Compounds R-HSA-211945	11/104	0.0209447	0.500914	2.14016	8.27357	AOC1;ACSS2;MTARC2;ALDH2;MTARC1;CYP4F3;EPHX1;ALDH1A1;CYP46A1;ADH5;PTGS1
Keratan Sulfate Degradation R-HSA-2022857	3/12	0.0223957	0.500914	6.01206	22.8391	GLB1L;KERA;FMOD
Regulation Of Glycolysis By Fructose 2,6-Bisphosphate Metabolism R-HSA-9634600	3/12	0.0223957	0.500914	6.01206	22.8391	PFKFB3;PPP2R1B;PRKACB
Translation Of Replicase And Assembly Of Replication Transcription Complex R-HSA-9679504	3/12	0.0223957	0.500914	6.01206	22.8391	MAP1LC3B;CHMP2B;PIK3C3
Post-translational Modification: Synthesis Of GPI-anchored Proteins R-HSA-163125	10/92	0.0227485	0.500914	2.20576	8.34496	PIGS;DPM1;CPM;CNTN5;NTM;PIGP;LY6D;PIGK;LYPD1;OPCML
Telomere Maintenance R-HSA-157579	10/92	0.0227485	0.500914	2.20576	8.34496	PPP6C;H2AJ;RTEL1;CHTF8;H3-4;TERT;H2BC5;CDK2;H2AC19;POLR2L
G1/S DNA Damage Checkpoints R-HSA-69615	8/67	0.0239724	0.500914	2.4508	9.14357	PSMD12;PSMB5;PSMA1;CCNE1;CHEK1;CDK2;CDC25A;PSMA8
Condensation Of Prophase Chromosomes R-HSA-2299718	6/43	0.024201	0.500914	2.92883	10.8992	H2AJ;H3-4;H2BC5;H2AC19;CDK1;MCPH1
Smooth Muscle Contraction R-HSA-445355	6/43	0.024201	0.500914	2.92883	10.8992	ANXA1;ALDH2;ANXA2;ANXA6;SORBS1;CACNA1G
Signaling By Interleukins R-HSA-449147	34/453	0.0243006	0.500914	1.47543	5.48456	CNTFR;PSMD12;NLRX1;IRS2;PIK3R1;IL18BP;PSMA8;IL27RA;CDC42;SOCS3;IL1RL1;PSMB5;PTPRZ1;PPP2R1B;NKIRAS1;MYC;NKIRAS2;JAK1;MCL1;IL11;ANXA1;ANXA2;MMP1;FN1;IL17RE;OPRM1;VAV1;MAPK10;PSMA1;BCL6;PTPN4;CRK;SOS2;BCL2L1
RAC3 GTPase Cycle R-HSA-9013423	10/93	0.0243318	0.500914	2.17907	8.09737	CDC42;ARHGAP21;ARHGAP42;STBD1;CDC42EP1;VRK2;PIK3R1;ESYT1;BAIAP2;ARHGAP6
GPVI-mediated Activation Cascade R-HSA-114604	5/32	0.0247124	0.500914	3.34323	12.3715	CDC42;SPNS1;PIK3R1;RHOA;VAV1
Diseases Of Base Excision Repair R-HSA-9605308	2/5	0.0248971	0.500914	12.0165	44.377	NEIL3;MUTYH
Serotonin And Melatonin Biosynthesis R-HSA-209931	2/5	0.0248971	0.500914	12.0165	44.377	DDC;AANAT
Interleukin-4 And Interleukin-13 Signaling R-HSA-6785807	11/107	0.0252803	0.500914	2.07295	7.62373	SOCS3;ANXA1;BCL6;MMP1;MYC;FN1;PIK3R1;OPRM1;MCL1;BCL2L1;JAK1
Phase II - Conjugation Of Compounds R-HSA-156580	11/107	0.0252803	0.500914	2.07295	7.62373	AS3MT;MTRR;SLC26A1;UGT1A1;MGST1;BPNT2;GLYAT;COMT;GCLM;ACSM2B;SULT2A1
Apoptosis R-HSA-109581	16/178	0.0259853	0.500914	1.78911	6.53066	BCAP31;PSMD12;TNFRSF10B;SEPTIN4;PSMA8;ARHGAP10;PSMB5;FNTA;STK24;PSMA1;PRKCQ;MAPT;TLR4;YWHAG;BCL2L1;APPL1
Protein Localization R-HSA-9609507	15/164	0.0265739	0.500914	1.82314	6.61402	TOMM70;PECR;CYB5A;PEX19;MTX1;PIPOX;GLYAT;UBE2J2;GFER;HMGCL;CHCHD3;ACOX1;AGXT;CRAT;COA6
Programmed Cell Death R-HSA-5357801	18/208	0.0266966	0.500914	1.71689	6.22066	BCAP31;PSMD12;TNFRSF10B;SEPTIN4;PSMA8;ARHGAP10;PSMB5;PSMA1;FNTA;STK24;CHMP2B;CASP4;PRKCQ;MAPT;TLR4;YWHAG;APPL1;BCL2L1
Base-Excision Repair, AP Site Formation R-HSA-73929	6/44	0.026816	0.500914	2.85161	10.3193	H2AJ;NEIL3;H3-4;H2BC5;H2AC19;MUTYH
Meiotic Recombination R-HSA-912446	7/56	0.0269138	0.500914	2.58099	9.33057	H2AJ;H3-4;H2BC5;MSH5;CDK2;H2AC19;BRCA1
Keratan Sulfate/Keratin Metabolism R-HSA-1638074	5/33	0.0279022	0.500914	3.22366	11.5376	GLB1L;KERA;B4GALT6;FMOD;ST3GAL3
Chk1/Chk2(Cds1) Mediated Inactivation Of Cyclin B:Cdk1 Complex R-HSA-75035	3/13	0.0279967	0.500914	5.41057	19.3464	CHEK1;CDK1;YWHAG
Defective EXT1 Causes Exostoses 1, TRPS2 And CHDS R-HSA-3656253	3/13	0.0279967	0.500914	5.41057	19.3464	GPC3;GPC5;GPC6
Activation Of Arylsulfatases R-HSA-1663150	3/13	0.0279967	0.500914	5.41057	19.3464	ARSA;ARSG;ARSB
Telomere Extension By Telomerase R-HSA-171319	4/23	0.030393	0.536538	3.79871	13.2709	PPP6C;RTEL1;TERT;CDK2
Signaling By Rho GTPases R-HSA-194315	45/644	0.0326177	0.561609	1.36746	4.68067	ITSN1;FAM13A;H2AC19;PIK3R1;FNBP1L;ARHGAP6;SKA2;PREX2;CDC42;AKAP12;ARHGAP21;GJA1;ARHGAP42;PDZD2;PPP2R1B;STBD1;CCT7;FAM83B;YWHAG;BCAP31;STARD13;CPSF7;H2BC5;MTX1;ARHGEF15;PLEKHG5;RRAS2;MACO1;VRK2;KCTD3;FAM91A1;BAIAP2;RHOA;VAV1;ARHGAP24;SGO2;ARHGAP10;H2AJ;FMNL2;UBXN11;CDC42EP1;PIK3C3;ESYT1;SOS2;CDC42SE2
Mitotic Prophase R-HSA-68875	11/112	0.0338958	0.561609	1.9698	6.66673	RAB1A;H2AJ;H3-4;PPP2R1B;H2BC5;NEK7;H2AC19;CDK1;VRK2;ARPP19;MCPH1
Methylation R-HSA-156581	3/14	0.0342683	0.561609	4.91844	16.5925	AS3MT;MTRR;COMT
Interleukin-6 Family Signaling R-HSA-6783589	4/24	0.0349975	0.561609	3.60858	12.0977	CNTFR;IL11;SOCS3;JAK1
Synthesis Of Very Long-Chain Fatty acyl-CoAs R-HSA-75876	4/24	0.0349975	0.561609	3.60858	12.0977	ACSL4;ACSBG1;ACSL3;ACSF3
Antigen Processing: Ubiquitination And Proteasome Degradation R-HSA-983168	24/307	0.0350128	0.561609	1.5382	5.15613	PRKN;PSMD12;UBE2H;HACE1;UBE2D4;NEDD4L;FBXO15;LNPEP;UBR2;RNF6;FBXL16;UBE2J2;LRRC41;PSMA8;PJA1;SPSB2;SOCS3;PSMB5;PSMA1;BTBD1;ASB10;RNF217;UBA1;SKP2
Activated NTRK2 Signals Thru PI3K R-HSA-9028335	2/6	0.036055	0.561609	9.01189	29.9439	NTRK2;PIK3R1
Conjugation Of Benzoate With Glycine R-HSA-177135	2/6	0.036055	0.561609	9.01189	29.9439	GLYAT;ACSM2B
PTK6 Regulates Cell Cycle R-HSA-8849470	2/6	0.036055	0.561609	9.01189	29.9439	CCNE1;CDK2
RUNX1 Regulates Transcription Of Genes Involved In WNT Signaling R-HSA-8939256	2/6	0.036055	0.561609	9.01189	29.9439	CBFB;RSPO3
Diseases Of Metabolism R-HSA-5668914	20/247	0.0375124	0.577517	1.59665	5.24193	NOTCH2;MTRR;UGT1A1;GFPT1;KERA;ADAMTSL1;DPM1;GALE;MUC2;NAGLU;PCCA;GPC3;GPC5;FMOD;GYG2;GCLM;GPC6;ARSB;PGM1;ST3GAL3
Diseases Of Glycosylation R-HSA-3781865	13/143	0.0387465	0.586561	1.80933	5.8816	NOTCH2;GFPT1;KERA;DPM1;ADAMTSL1;GALE;MUC2;GPC3;GPC5;FMOD;GPC6;PGM1;ST3GAL3
Signaling By FGFR1 In Disease R-HSA-5655302	5/36	0.0389859	0.586561	2.91123	9.44564	BAG4;TRIM24;PIK3R1;ERLIN2;FGF1
Cyclin A/B1/B2 Associated Events During G2/M Transition R-HSA-69273	4/25	0.0399834	0.588498	3.43656	11.0633	PPP2R1B;CDK2;CDK1;CDC25A
Signaling By NOTCH R-HSA-157118	17/203	0.0400036	0.588498	1.65513	5.32751	NOTCH2;HDAC5;PSMD12;TLE1;H2BC5;FLT4;H2AC19;DTX1;CCNC;PBX1;H2AJ;PSMB5;AGO3;PSMA1;MYC;TMED2;ST3GAL3
GRB2:SOS Provides Linkage To MAPK Signaling For Integrins R-HSA-354194	3/15	0.0412008	0.599449	4.50833	14.3784	FGB;FGA;FN1
ABC-family Proteins Mediated Transport R-HSA-382556	10/102	0.0422901	0.608609	1.96496	6.21558	PSMD12;PSMB5;PEX19;PSMA1;ABCB7;ABCC5;ABCC9;ERLIN2;ABCC10;PSMA8
Triglyceride Metabolism R-HSA-8979227	5/37	0.0431975	0.614983	2.8201	8.86069	FABP1;LIPE;FABP2;ABHD5;PRKACB
Peroxisomal Protein Import R-HSA-9033241	7/63	0.0469876	0.644158	2.25753	6.90323	PECR;HMGCL;ACOX1;PIPOX;GLYAT;AGXT;CRAT
MAPK6/MAPK4 Signaling R-HSA-5687128	9/90	0.0471434	0.644158	2.00788	6.13318	CDC42;PSMD12;PSMB5;PSMA1;AGO3;MYC;CDK1;PRKACB;PSMA8
Apoptotic Cleavage Of Cellular Proteins R-HSA-111465	5/38	0.0476716	0.644158	2.7345	8.32223	BCAP31;FNTA;STK24;PRKCQ;MAPT
Activation Of NIMA Kinases NEK9, NEK6, NEK7 R-HSA-2980767	2/7	0.0487406	0.644158	7.20913	21.7805	NEK7;CDK1
Attachment Of GPI Anchor To uPAR R-HSA-162791	2/7	0.0487406	0.644158	7.20913	21.7805	PIGS;PIGK
Phase 1 - Inactivation Of Fast Na+ Channels R-HSA-5576894	2/7	0.0487406	0.644158	7.20913	21.7805	KCNIP2;KCNIP3
G2/M Checkpoints R-HSA-69481	13/148	0.0488069	0.644158	1.74185	5.26019	PSMD12;H2BC5;BRCA1;CDC25A;PSMA8;PSMB5;H3-4;PSMA1;CHEK1;CDK2;CDK1;ATRIP;YWHAG
RAC1 GTPase Cycle R-HSA-9013149	15/178	0.0491389	0.644158	1.66531	5.01774	ARHGEF15;FAM13A;VRK2;PIK3R1;BAIAP2;ARHGAP24;VAV1;PREX2;CDC42;ARHGAP21;ARHGAP10;ARHGAP42;CDC42EP1;ESYT1;SOS2
Ubiquitin Mediated Degradation Of Phosphorylated Cdc25A R-HSA-69601	6/51	0.0503664	0.653776	2.40713	7.19355	PSMD12;PSMB5;PSMA1;CHEK1;CDC25A;PSMA8
Integrin Signaling R-HSA-354192	4/27	0.0511015	0.656877	3.1374	9.33044	FGB;FGA;FN1;CRK
RHOD GTPase Cycle R-HSA-9013405	6/52	0.0545125	0.689363	2.35468	6.85052	AKAP12;ARHGAP21;STBD1;VRK2;PIK3R1;ESYT1
IL-6-type Cytokine Receptor Ligand Interactions R-HSA-6788467	3/17	0.056986	0.689363	3.86388	11.0698	CNTFR;IL11;JAK1
MyD88 Deficiency (TLR2/4) R-HSA-5602498	3/17	0.056986	0.689363	3.86388	11.0698	FGB;FGA;TLR4
Keratan Sulfate Biosynthesis R-HSA-2022854	4/28	0.0572303	0.689363	3.00651	8.60065	KERA;B4GALT6;FMOD;ST3GAL3
RUNX1 Regulates Genes Involved In Megakaryocyte Differentiation And Platelet Function R-HSA-8936459	7/66	0.0579041	0.689363	2.1424	6.10362	H2AJ;CBFB;H2BC5;AGO3;H2AC19;PRKCQ;GATA1
TCF Dependent Signaling In Response To WNT R-HSA-201681	16/198	0.058964	0.689363	1.59081	4.50331	PSMD12;TLE1;H2BC5;TRRAP;H2AC19;PSMA8;H2AJ;PSMB5;H3-4;PPP2R1B;TERT;PSMA1;MYC;RSPO2;RSPO3;SOX6
Axonal Growth Inhibition (RHOA Activation) R-HSA-193634	2/8	0.0627626	0.689363	6.00729	16.6306	RHOA;RTN4
Conjugation Of Salicylate With Glycine R-HSA-177128	2/8	0.0627626	0.689363	6.00729	16.6306	GLYAT;ACSM2B
Defective B4GALT1 Causes B4GALT1-CDG (CDG-2d) R-HSA-3656244	2/8	0.0627626	0.689363	6.00729	16.6306	KERA;FMOD
Defective CHST6 Causes MCDC1 R-HSA-3656225	2/8	0.0627626	0.689363	6.00729	16.6306	KERA;FMOD
RUNX1 Regulates Transcription Of Genes Involved In Differentiation Of Keratinocytes R-HSA-8939242	2/8	0.0627626	0.689363	6.00729	16.6306	SOCS3;CBFB
Synthesis Of Ketone Bodies R-HSA-77111	2/8	0.0627626	0.689363	6.00729	16.6306	HMGCL;BDH1
VEGF Binds To VEGFR Leading To Receptor Dimerization R-HSA-195399	2/8	0.0627626	0.689363	6.00729	16.6306	FLT4;VEGFB
RHOJ GTPase Cycle R-HSA-9013409	6/54	0.0634063	0.689363	2.25633	6.22339	CDC42;ARHGAP21;GJA1;CDC42EP1;PIK3R1;FNBP1L
SUMOylation Of Intracellular Receptors R-HSA-4090294	4/29	0.063734	0.689363	2.8861	7.94554	THRA;VDR;NR2C1;PIAS2
Acyl Chain Remodelling Of PG R-HSA-1482925	3/18	0.0657978	0.689363	3.6061	9.81279	LPGAT1;PLA2G5;CRLS1
IRAK4 Deficiency (TLR2/4) R-HSA-5603041	3/18	0.0657978	0.689363	3.6061	9.81279	FGB;FGA;TLR4
Pre-NOTCH Processing In Golgi R-HSA-1912420	3/18	0.0657978	0.689363	3.6061	9.81279	NOTCH2;TMED2;ST3GAL3
Regulation Of TLR By Endogenous Ligand R-HSA-5686938	3/18	0.0657978	0.689363	3.6061	9.81279	FGB;FGA;TLR4
Regulation Of Signaling By CBL R-HSA-912631	3/18	0.0657978	0.689363	3.6061	9.81279	PIK3R1;CRK;VAV1
Cyclin E Associated Events During G1/S Transition R-HSA-69202	8/82	0.0665443	0.689363	1.95246	5.29096	PSMD12;PSMB5;PSMA1;CCNE1;MYC;CDK2;SKP2;CDC25A
Mitochondrial Translation Elongation R-HSA-5389840	8/82	0.0665443	0.689363	1.95246	5.29096	MRPL3;MRPL53;MRPS26;MRPL1;MRPS27;MRPL39;MRPS30;MRPL35
Mitochondrial Translation Initiation R-HSA-5368286	8/82	0.0665443	0.689363	1.95246	5.29096	MRPL3;MRPL53;MRPS26;MRPL1;MRPS27;MRPL39;MRPS30;MRPL35
Mitochondrial Translation Termination R-HSA-5419276	8/82	0.0665443	0.689363	1.95246	5.29096	MRPL3;MRPL53;MRPS26;MRPL1;MRPS27;MRPL39;MRPS30;MRPL35
Cleavage Of Damaged Pyrimidine R-HSA-110329	5/42	0.0682074	0.689363	2.43836	6.5475	H2AJ;NEIL3;H3-4;H2BC5;H2AC19
Gamma Carboxylation, Hypusine Formation And Arylsulfatase Activation R-HSA-163841	5/42	0.0682074	0.689363	2.43836	6.5475	ARSA;DPH3;TTF2;ARSG;ARSB
RND1 GTPase Cycle R-HSA-9696273	5/42	0.0682074	0.689363	2.43836	6.5475	UBXN11;PLEKHG5;RRAS2;PIK3R1;FAM83B
RND3 GTPase Cycle R-HSA-9696264	5/42	0.0682074	0.689363	2.43836	6.5475	ARHGAP21;UBXN11;PLEKHG5;PIK3R1;FAM83B
RUNX1 Regulates Transcription Of Genes Involved In Differentiation Of HSCs R-HSA-8939236	9/98	0.0730346	0.727051	1.82662	4.77993	PSMD12;H2AJ;PSMB5;CBFB;PSMA1;H2BC5;H2AC19;GATA1;PSMA8
Visual Phototransduction R-HSA-2187338	9/98	0.0730346	0.727051	1.82662	4.77993	RBP4;FNTA;GPC3;LPL;RDH5;PRKCQ;GPC5;GUCA1C;GPC6
Retinoid Metabolism And Transport R-HSA-975634	5/43	0.0739977	0.729942	2.37407	6.18142	RBP4;GPC3;LPL;GPC5;GPC6
Cyclin A:Cdk2-associated Events At S Phase Entry R-HSA-69656	8/84	0.0744276	0.729942	1.90088	4.93835	PSMD12;PSMB5;PSMA1;CCNE1;MYC;CDK2;SKP2;CDC25A
Scavenging By Class A Receptors R-HSA-3000480	3/19	0.0751902	0.731911	3.38054	8.74793	COL4A2;COL4A1;MASP1
Glyoxylate Metabolism And Glycine Degradation R-HSA-389661	4/31	0.0778427	0.731911	2.67203	6.82188	ALDH4A1;HOGA1;LIAS;AGXT
Amino Acid Conjugation R-HSA-156587	2/9	0.0779452	0.731911	5.14884	13.1385	GLYAT;ACSM2B
Phase 3 - Rapid Repolarisation R-HSA-5576890	2/9	0.0779452	0.731911	5.14884	13.1385	KCNE1;AKAP9
p75NTR Regulates Axonogenesis R-HSA-193697	2/9	0.0779452	0.731911	5.14884	13.1385	RHOA;RTN4
tRNA Modification In Mitochondrion R-HSA-6787450	2/9	0.0779452	0.731911	5.14884	13.1385	HSD17B10;TRMT61B
KEAP1-NFE2L2 Pathway R-HSA-9755511	9/100	0.0806517	0.751992	1.78628	4.49717	PSMD12;MAP1LC3B;PSMB5;PSMA1;MYC;FBXL17;SKP2;GCLM;PSMA8
Defective B3GALT6 Causes EDSP2 And SEMDJL1 R-HSA-4420332	3/20	0.085136	0.76244	3.18151	7.83767	GPC3;GPC5;GPC6
Defective B3GAT3 Causes JDSSDHD R-HSA-3560801	3/20	0.085136	0.76244	3.18151	7.83767	GPC3;GPC5;GPC6
Defective B4GALT7 Causes EDS, Progeroid Type R-HSA-3560783	3/20	0.085136	0.76244	3.18151	7.83767	GPC3;GPC5;GPC6
PPARA Activates Gene Expression R-HSA-1989781	10/116	0.0852279	0.76244	1.70417	4.1964	FABP1;MUSK;ACOX1;PEX11A;CCNC;AGXT;TNFRSF21;SULT2A1;MED7;MED13L
Mitotic G1 Phase And G1/S Transition R-HSA-453279	12/147	0.0875274	0.76244	1.60632	3.91268	PSMD12;CDKN2B;PSMB5;PPP2R1B;PSMA1;CCNE1;MYC;CDK2;DYRK1A;CDK1;SKP2;CDC25A
Signaling By VEGF R-HSA-194138	9/102	0.0887316	0.76244	1.74768	4.23313	CDC42;FLT4;VEGFB;PIK3R1;BAIAP2;PRKACB;CRK;RHOA;VAV1
O-linked Glycosylation Of Mucins R-HSA-913709	6/59	0.0891446	0.76244	2.04293	4.93877	B3GNT8;MUC2;GCNT3;GALNTL6;B4GALT6;ST3GAL3
SCF(Skp2)-mediated Degradation Of P27/P21 R-HSA-187577	6/59	0.0891446	0.76244	2.04293	4.93877	PSMD12;PSMB5;PSMA1;CCNE1;CDK2;SKP2
Transcriptional Regulation Of Granulopoiesis R-HSA-9616222	6/59	0.0891446	0.76244	2.04293	4.93877	H2AJ;CBFB;H2BC5;MYC;CDK2;H2AC19
Mitochondrial Translation R-HSA-5368287	8/88	0.0918123	0.76244	1.80545	4.31144	MRPL3;MRPL53;MRPS26;MRPL1;MRPS27;MRPL39;MRPS30;MRPL35
Chromosome Maintenance R-HSA-73886	10/118	0.0929601	0.76244	1.67244	3.97302	PPP6C;RTEL1;H2AJ;CHTF8;H3-4;TERT;H2BC5;CDK2;H2AC19;POLR2L
Regulation Of Lipid Metabolism By PPARalpha R-HSA-400206	10/118	0.0929601	0.76244	1.67244	3.97302	FABP1;MUSK;ACOX1;PEX11A;CCNC;AGXT;TNFRSF21;SULT2A1;MED7;MED13L
Packaging Of Telomere Ends R-HSA-171306	4/33	0.093368	0.76244	2.48749	5.89836	H2AJ;H3-4;H2BC5;H2AC19
Signaling By High-Kinase Activity BRAF Mutants R-HSA-6802948	4/33	0.093368	0.76244	2.48749	5.89836	FGB;FGA;FN1;MARK3
Glycoprotein Hormones R-HSA-209822	2/10	0.0941277	0.76244	4.505	10.6458	CGB3;INHBA
Ketone Body Metabolism R-HSA-74182	2/10	0.0941277	0.76244	4.505	10.6458	HMGCL;BDH1
MAPK3 (ERK1) Activation R-HSA-110056	2/10	0.0941277	0.76244	4.505	10.6458	CDK1;JAK1
Neurotransmitter Clearance R-HSA-112311	2/10	0.0941277	0.76244	4.505	10.6458	ALDH2;COMT
RHO GTPases Activate KTN1 R-HSA-5625970	2/10	0.0941277	0.76244	4.505	10.6458	CDC42;RHOA
RHOBTB3 ATPase Cycle R-HSA-9706019	2/10	0.0941277	0.76244	4.505	10.6458	CCNE1;LRRC41
rRNA Processing In Mitochondrion R-HSA-8868766	2/10	0.0941277	0.76244	4.505	10.6458	MTERF4;HSD17B10
DNA Double-Strand Break Repair R-HSA-5693532	12/149	0.0944413	0.76244	1.5827	3.73482	RTEL1;RAD51D;DCLRE1C;H3-4;PPP4R2;H2BC5;EYA2;EYA3;CHEK1;CDK2;BRCA1;ATRIP
ER-Phagosome Pathway R-HSA-1236974	8/89	0.0964941	0.771196	1.78307	4.16931	FGB;FGA;SEC14L3;PSMD12;PSMB5;PSMA1;TLR4;PSMA8
Estrogen-dependent Gene Expression R-HSA-9018519	10/119	0.0969778	0.771196	1.65701	3.86625	KANK1;H2AJ;CBFB;AGO3;CITED1;H2BC5;MYC;H2AC19;ZNF217;POLR2L
Antigen processing-Cross Presentation R-HSA-1236975	9/104	0.0972732	0.771196	1.71071	3.98635	FGB;SEC14L3;FGA;PSMD12;PSMB5;PSMA1;LNPEP;TLR4;PSMA8
Cyclin D Associated Events In G1 R-HSA-69231	5/47	0.0997104	0.77693	2.14751	4.95106	CDKN2B;PPP2R1B;CCNE1;CDK2;SKP2
Metabolism Of Fat-Soluble Vitamins R-HSA-6806667	5/47	0.0997104	0.77693	2.14751	4.95106	RBP4;GPC3;LPL;GPC5;GPC6
DNA Damage/Telomere Stress Induced Senescence R-HSA-2559586	6/61	0.100818	0.77693	1.96843	4.51644	H2AJ;H3-4;H2BC5;CCNE1;CDK2;H2AC19
Signaling By FGFR In Disease R-HSA-1226099	6/61	0.100818	0.77693	1.96843	4.51644	BAG4;TRIM24;PIK3R1;ERLIN2;FGF1;POLR2L
Regulation Of TP53 Activity Thru Phosphorylation R-HSA-6804756	8/90	0.101309	0.77693	1.76123	4.03249	PDZD2;TAF15;TAF13;CHEK1;CDK2;BRCA1;HIPK1;ATRIP
Common Pathway Of Fibrin Clot Formation R-HSA-140875	3/22	0.10657	0.77693	2.84632	6.37276	FGB;FGA;TTF2
Cytosolic Sulfonation Of Small Molecules R-HSA-156584	3/22	0.10657	0.77693	2.84632	6.37276	SLC26A1;BPNT2;SULT2A1
Nephrin Family Interactions R-HSA-373753	3/22	0.10657	0.77693	2.84632	6.37276	ACTN2;MAGI2;PIK3R1
PINK1-PRKN Mediated Mitophagy R-HSA-5205685	3/22	0.10657	0.77693	2.84632	6.37276	PRKN;TOMM70;MAP1LC3B
Inhibition Of DNA Recombination At Telomere R-HSA-9670095	5/48	0.106756	0.77693	2.09746	4.69246	H2AJ;H3-4;H2BC5;H2AC19;POLR2L
G2/M DNA Damage Checkpoint R-HSA-69473	7/77	0.110289	0.77693	1.80468	3.9787	H3-4;H2BC5;CHEK1;CDK1;BRCA1;ATRIP;YWHAG
Interleukin-27 Signaling R-HSA-9020956	2/11	0.111163	0.77693	4.00423	8.79633	IL27RA;JAK1
Interleukin-6 Signaling R-HSA-1059683	2/11	0.111163	0.77693	4.00423	8.79633	SOCS3;JAK1
Mucopolysaccharidoses R-HSA-2206281	2/11	0.111163	0.77693	4.00423	8.79633	NAGLU;ARSB
Regulation Of BACH1 Activity R-HSA-9708530	2/11	0.111163	0.77693	4.00423	8.79633	FBXL17;SKP2
Regulation Of IGF Transport And Uptake By IGFBPs R-HSA-381426	10/123	0.114051	0.77693	1.59801	3.46946	DNAJC3;FGA;MBTPS1;WFS1;MMP1;STC2;FN1;ANO8;GPC3;TTF2
G Alpha (12/13) Signaling Events R-HSA-416482	7/78	0.115997	0.77693	1.77917	3.83267	ARHGEF15;PLEKHG5;ITSN1;GNA12;SOS2;RHOA;VAV1
Pre-NOTCH Expression And Processing R-HSA-1912422	7/78	0.115997	0.77693	1.77917	3.83267	NOTCH2;H2AJ;H2BC5;AGO3;H2AC19;TMED2;ST3GAL3
RAF-independent MAPK1/3 Activation R-HSA-112409	3/23	0.117997	0.77693	2.70386	5.77841	PEA15;CDK1;JAK1
Activation Of ATR In Response To Replication Stress R-HSA-176187	4/36	0.119138	0.77693	2.25393	4.79518	CHEK1;CDK2;ATRIP;CDC25A
Regulation Of TP53 Degradation R-HSA-6804757	4/36	0.119138	0.77693	2.25393	4.79518	PPP2R1B;CDK2;CDK1;RFFL
Transcriptional Regulation By AP-2 (TFAP2) Family Of Transcription Factors R-HSA-8864260	4/36	0.119138	0.77693	2.25393	4.79518	WWOX;CITED1;MYC;CGB3
Oxygen-dependent Proline Hydroxylation Of Hypoxia-inducible Factor Alpha R-HSA-1234176	6/64	0.119747	0.77693	1.86632	3.96102	EGLN1;PSMD12;PSMB5;PSMA1;WTIP;PSMA8
Chondroitin Sulfate/Dermatan Sulfate Metabolism R-HSA-1793185	5/50	0.121552	0.77693	2.00403	4.22332	CHPF2;GPC3;GPC5;GPC6;ARSB
Extension Of Telomeres R-HSA-180786	5/50	0.121552	0.77693	2.00403	4.22332	PPP6C;RTEL1;CHTF8;TERT;CDK2
Hemostasis R-HSA-109582	37/576	0.122831	0.77693	1.24373	2.60803	SIRPG;GNAI3;MPL;PIK3R1;TTF2;GATA1;CLU;TREM1;ABHD12;CDC42;CYB5R1;KIF19;PPP2R1B;EPCAM;LAMP2;GNA12;PRKACB;CD99;CHID1;NANOS1;FGB;FGA;ANXA2;ACTN2;MMP1;RARRES2;FN1;VEGFB;TNFRSF10B;PSG2;RHOA;VAV1;GNAQ;CDK2;SPNS1;PRKCQ;CRK
Platelet Degranulation R-HSA-114608	10/125	0.123182	0.77693	1.57005	3.28783	CHID1;FGB;CYB5R1;FGA;ACTN2;RARRES2;LAMP2;FN1;VEGFB;CLU
Regulation Of TP53 Activity R-HSA-5633007	12/157	0.125311	0.77693	1.49474	3.10451	PDZD2;TAF15;PPP2R1B;TAF13;CHEK1;CDK2;CDK1;BRCA1;RFFL;HIPK1;ATRIP;POU4F1
Fatty Acid Metabolism R-HSA-8978868	13/173	0.12537	0.77693	1.46773	3.04773	PECR;CBR1;GPX1;MUSK;CYP4F3;ACSL4;ACSL3;ACSF3;PTGS1;PCCA;ACOX1;ACSBG1;CRAT
p53-Dependent G1 DNA Damage Response R-HSA-69563	6/65	0.126423	0.77693	1.83459	3.79416	PSMD12;PSMB5;PSMA1;CCNE1;CDK2;PSMA8
P75 NTR Receptor-Mediated Signaling R-HSA-193704	8/95	0.127338	0.77693	1.65957	3.42022	BEX3;ARHGEF15;PLEKHG5;ITSN1;SOS2;RHOA;VAV1;RTN4
COPI-mediated Anterograde Transport R-HSA-6807878	7/80	0.127865	0.77693	1.73024	3.55873	RAB1A;TMEM115;GOSR1;TMED2;ANK2;ANK3;TMED7
Processing Of DNA Double-Strand Break Ends R-HSA-5693607	7/80	0.127865	0.77693	1.73024	3.55873	H3-4;PPP4R2;H2BC5;CHEK1;CDK2;BRCA1;ATRIP
Fatty acyl-CoA Biosynthesis R-HSA-75105	4/37	0.128343	0.77693	2.18552	4.48697	ACSL4;ACSBG1;ACSL3;ACSF3
MAP2K And MAPK Activation R-HSA-5674135	4/37	0.128343	0.77693	2.18552	4.48697	FGB;FGA;FN1;MARK3
Regulation Of TP53 Expression And Degradation R-HSA-6806003	4/37	0.128343	0.77693	2.18552	4.48697	PPP2R1B;CDK2;CDK1;RFFL
Activation Of TFAP2 (AP-2) Family Of Transcription Factors R-HSA-8866907	2/12	0.128916	0.77693	3.60362	7.38234	WWOX;CITED1
CD28 Dependent Vav1 Pathway R-HSA-389359	2/12	0.128916	0.77693	3.60362	7.38234	CDC42;VAV1
Cytosolic Iron-Sulfur Cluster Assembly R-HSA-2564830	2/12	0.128916	0.77693	3.60362	7.38234	RTEL1;ABCB7
Erythropoietin Activates Phosphoinositide-3-kinase (PI3K) R-HSA-9027276	2/12	0.128916	0.77693	3.60362	7.38234	IRS2;PIK3R1
Interleukin-35 Signaling R-HSA-8984722	2/12	0.128916	0.77693	3.60362	7.38234	IL27RA;JAK1
P2Y Receptors R-HSA-417957	2/12	0.128916	0.77693	3.60362	7.38234	P2RY6;P2RY2
Peptide Hormone Biosynthesis R-HSA-209952	2/12	0.128916	0.77693	3.60362	7.38234	CGB3;INHBA
Diseases Of DNA Repair R-HSA-9675135	5/51	0.129289	0.77693	1.96036	4.01031	NEIL3;RAD51D;BRCA1;ATRIP;MUTYH
Cytosolic tRNA Aminoacylation R-HSA-379716	3/24	0.129854	0.77693	2.57497	5.2564	HARS1;NARS1;PPA1
Signaling By Erythropoietin R-HSA-9006335	3/24	0.129854	0.77693	2.57497	5.2564	IRS2;PIK3R1;VAV1
Glycerophospholipid Biosynthesis R-HSA-1483206	10/127	0.132701	0.77693	1.54305	3.11643	PHOSPHO1;PCYT1B;LPGAT1;SLC44A4;CPNE6;DDHD2;PLAAT3;PLA2G5;DDHD1;CRLS1
Integrin Cell Surface Interactions R-HSA-216083	6/66	0.133275	0.77693	1.80392	3.63551	FGB;FGA;COL4A2;ITGAD;COL4A1;FN1
Apoptotic Execution Phase R-HSA-75153	5/52	0.137244	0.77693	1.91855	3.81022	BCAP31;FNTA;STK24;PRKCQ;MAPT
Regulation Of Apoptosis R-HSA-169911	5/52	0.137244	0.77693	1.91855	3.81022	ARHGAP10;PSMD12;PSMB5;PSMA1;PSMA8
Signaling By Non-Receptor Tyrosine Kinases R-HSA-9006927	5/52	0.137244	0.77693	1.91855	3.81022	SOCS3;CCNE1;CDK2;CRK;RHOA
Signaling By RAF1 Mutants R-HSA-9656223	4/38	0.137834	0.77693	2.12112	4.20345	FGB;FGA;FN1;MARK3
RNA Polymerase II Transcription Termination R-HSA-73856	6/67	0.140299	0.77693	1.77425	3.48459	LSM10;CPSF7;MAGOH;THOC5;WDR33;U2AF1L4
Assembly And Cell Surface Presentation Of NMDA Receptors R-HSA-9609736	3/25	0.142109	0.77693	2.45779	4.79555	DLG1;GRIN3A;ACTN2
Interleukin-7 Signaling R-HSA-1266695	3/25	0.142109	0.77693	2.45779	4.79555	IRS2;PIK3R1;JAK1
G1/S Transition R-HSA-69206	10/129	0.142601	0.77693	1.51696	2.95458	PSMD12;PSMB5;PPP2R1B;PSMA1;CCNE1;MYC;CDK2;CDK1;SKP2;CDC25A
Heparan Sulfate/Heparin (HS-GAG) Metabolism R-HSA-1638091	5/53	0.145409	0.77693	1.87848	3.62209	NAGLU;GLB1L;GPC3;GPC5;GPC6
Signaling By WNT R-HSA-195721	20/294	0.145503	0.77693	1.31945	2.54332	PSMD12;TLE1;H2BC5;TRRAP;H2AC19;RHOA;PSMA8;H2AJ;PSMB5;WNT11;H3-4;PPP2R1B;TERT;AGO3;PSMA1;MYC;RSPO2;RSPO3;SOX6;WLS
HDR Thru Homologous Recombination (HRR) Or Single Strand Annealing (SSA) R-HSA-5693567	9/114	0.146724	0.77693	1.54696	2.96894	RTEL1;RAD51D;H3-4;PPP4R2;H2BC5;CHEK1;CDK2;BRCA1;ATRIP
Diseases Associated With Visual Transduction R-HSA-2474795	2/13	0.147265	0.77693	3.27584	6.27494	RBP4;RDH5
Erythropoietin Activates RAS R-HSA-9027284	2/13	0.147265	0.77693	3.27584	6.27494	IRS2;VAV1
Glycogen Synthesis R-HSA-3322077	2/13	0.147265	0.77693	3.27584	6.27494	GYG2;PGM1
PTK6 Regulates RHO GTPases, RAS GTPase And MAP Kinases R-HSA-8849471	2/13	0.147265	0.77693	3.27584	6.27494	CRK;RHOA
Alpha-Linolenic (Omega3) And Linoleic (Omega6) Acid Metabolism R-HSA-2046104	2/13	0.147265	0.77693	3.27584	6.27494	MUSK;ACOX1
Response To Elevated Platelet Cytosolic Ca2+ R-HSA-76005	10/130	0.14769	0.77693	1.50423	2.87706	CHID1;FGB;CYB5R1;FGA;ACTN2;RARRES2;LAMP2;FN1;VEGFB;CLU
L1CAM Interactions R-HSA-373760	8/99	0.150417	0.77693	1.58629	3.00497	DLG1;CNTN6;ANK2;ANK3;SCN3B;SCN2A;SCN3A;SCN1B
G Alpha (Q) Signaling Events R-HSA-416476	15/212	0.150935	0.77693	1.3754	2.60075	XCR1;ANXA1;MLNR;PIK3R1;TTF2;ABHD12;PROKR2;GRM5;P2RY6;RGS3;GNAQ;P2RY2;GNRH2;PRKCQ;AGXT
Deubiquitination R-HSA-5688426	19/279	0.151759	0.77693	1.32069	2.4901	TOMM70;PRKN;OTUB2;PSMD12;H2BC5;TRRAP;H2AC19;FOXK2;BRCA1;RHOA;CDC25A;PSMA8;PSMB5;PSMA1;MYC;CDK1;STAMBP;SUDS3;SKP2
Degradation Of Beta-Catenin By Destruction Complex R-HSA-195253	7/84	0.153331	0.77693	1.64001	3.07528	PSMD12;TLE1;PSMB5;PPP2R1B;PSMA1;MYC;PSMA8
GAG Synthesis Requires Tetrasaccharide Linker Sequence R-HSA-1971475	3/26	0.154729	0.77693	2.35081	4.38679	GPC3;GPC5;GPC6
Caspase Activation Via Extrinsic Apoptotic Signaling Pathway R-HSA-5357769	3/26	0.154729	0.77693	2.35081	4.38679	TNFRSF10B;TLR4;APPL1
Signaling By ALK R-HSA-201556	3/26	0.154729	0.77693	2.35081	4.38679	PTPRZ1;MYC;PIK3R1
Orc1 Removal From Chromatin R-HSA-68949	6/69	0.154845	0.77693	1.71774	3.20415	PSMD12;PSMB5;PSMA1;CDK2;SKP2;PSMA8
Stimuli-sensing Channels R-HSA-2672351	8/100	0.156484	0.77693	1.56896	2.91012	RYR1;TRPV6;ASPH;ANO8;BSND;NEDD4L;ANO6;ANO5
Presynaptic Phase Of Homologous DNA Pairing And Strand Exchange R-HSA-5693616	4/40	0.157617	0.77693	2.00307	3.70085	RAD51D;CHEK1;BRCA1;ATRIP
Innate Immune System R-HSA-168249	62/1035	0.158167	0.77693	1.15571	2.13125	PYGB;TTF2;CLU;TREM1;PPP2R1B;NKIRAS1;STBD1;NKIRAS2;LAMP2;CASP4;TOM1;EPPIN;PRKACB;PGM1;TOMM70;NANOS1;FGB;ARSA;FGA;SERPINB1;NHLRC3;ANXA2;NFAM1;ANO6;RHOA;VAV1;DNAJC3;PSMA1;IRF7;SPNS1;PIK3C3;PRKCQ;MASP1;CRK;TLR4;PSMD12;ASAH1;NLRX1;CFH;DEFB125;MGST1;LPO;PIK3R1;GLYAT;PSMA8;CDC42;SYNGR1;PSMB5;PDZD2;MUC2;ORMDL3;ARSB;POLR2L;ATP6V1F;AOC1;TREX1;BAIAP2;MAPK10;NAT8;QPCT;PTPN4;BCL2L1
Cellular Response To Chemical Stress R-HSA-9711123	13/182	0.163914	0.77693	1.38891	2.51171	PSMD12;GPX1;TACO1;FBXL17;GLYAT;PSMA8;FABP1;MAP1LC3B;PSMB5;PSMA1;MYC;SKP2;GCLM
Golgi Cisternae Pericentriolar Stack Reorganization R-HSA-162658	2/14	0.166098	0.77693	3.0027	5.39037	RAB1A;CDK1
Interleukin-15 Signaling R-HSA-8983432	2/14	0.166098	0.77693	3.0027	5.39037	SOS2;JAK1
LGI-ADAM Interactions R-HSA-5682910	2/14	0.166098	0.77693	3.0027	5.39037	CACNG8;CACNG4
Physiological Factors R-HSA-5578768	2/14	0.166098	0.77693	3.0027	5.39037	NPR1;HIPK1
Regulation Of IFNG Signaling R-HSA-877312	2/14	0.166098	0.77693	3.0027	5.39037	SOCS3;JAK1
Repression Of WNT Target Genes R-HSA-4641265	2/14	0.166098	0.77693	3.0027	5.39037	TLE1;MYC
TP53 Regulates Transcription Of Genes Involved In G1 Cell Cycle Arrest R-HSA-6804116	2/14	0.166098	0.77693	3.0027	5.39037	CCNE1;CDK2
TP53 Regulates Transcription Of Additional Cell Death Genes With Uncertain Roles In P53-Dependent Apoptosis R-HSA-6803205	2/14	0.166098	0.77693	3.0027	5.39037	BCL6;NDRG1
Tryptophan Catabolism R-HSA-71240	2/14	0.166098	0.77693	3.0027	5.39037	AADAT;KYAT1
Resolution Of D-loop Structures Thru Synthesis-Dependent Strand Annealing (SDSA) R-HSA-5693554	3/27	0.167683	0.77693	2.25274	4.02267	RTEL1;RAD51D;BRCA1
Synthesis Of PC R-HSA-1483191	3/27	0.167683	0.77693	2.25274	4.02267	PCYT1B;PHOSPHO1;SLC44A4
Paradoxical Activation Of RAF Signaling By Kinase Inactive BRAF R-HSA-6802955	4/41	0.167881	0.77693	1.94883	3.4777	FGB;FGA;FN1;MARK3
Sensory Perception Of Sweet, Bitter, And Umami (Glutamate) Taste R-HSA-9717207	4/41	0.167881	0.77693	1.94883	3.4777	TAS2R46;SCN2A;SCN3A;SCN1B
Post-translational Protein Modification R-HSA-597592	81/1383	0.168362	0.77693	1.12935	2.0121	PIGS;CPM;THRA;TRRAP;PIGP;H2AC19;BRCA1;TTF2;PARK7;ADAMTSL1;PPP6C;POFUT2;MYC;TMED2;MAN1A1;SKP2;TMED7;TOMM70;ARSA;FGA;ANO8;FBXO15;ANK2;ANK3;SENP2;LRRC41;CDC25A;PIAS2;RHOA;DNAJC3;DPM1;B3GNT8;PSMA1;PIGK;LY6D;STAMBP;B4GALT6;PRKN;OTUB2;RAB1A;PSMD12;SAR1B;NTM;GOSR1;DCUN1D4;LYPD1;FOXK2;UBE2J2;NR2C1;PSMA8;SOCS3;NEU3;PSMB5;MUC2;BTBD1;ASB10;STC2;DPH3;GPC3;GCNT3;FEM1C;ARSG;SUDS3;ARSB;ST3GAL3;OPCML;MBTPS1;UBE2…
Cell Surface Interactions At Vascular Wall R-HSA-202733	10/134	0.16895	0.77693	1.4554	2.58793	MMP1;EPCAM;SIRPG;FN1;TNFRSF10B;TTF2;PSG2;PIK3R1;TREM1;CD99
APC/C-mediated Degradation Of Cell Cycle Proteins R-HSA-174143	7/87	0.173846	0.77693	1.57826	2.7613	PSMD12;PSMB5;PSMA1;CDK2;CDK1;SKP2;PSMA8
Transcriptional Regulation By TP53 R-HSA-3700989	23/354	0.175305	0.77693	1.25588	2.18678	TAF15;GADD45A;TAF13;TACO1;TNFRSF10B;BRCA1;HIPK1;POU4F1;NDRG1;RAD51D;PDZD2;PPP2R1B;RRAGC;AGO3;BCL6;CCNE1;CHEK1;CDK2;CDK1;RFFL;ATRIP;YWHAG;POLR2L
Homology Directed Repair R-HSA-5693538	9/119	0.175404	0.77693	1.47625	2.56966	RTEL1;RAD51D;H3-4;PPP4R2;H2BC5;CHEK1;CDK2;BRCA1;ATRIP
Diseases Of Signal Transduction By Growth Factor Receptors And Second Messengers R-HSA-5663202	27/424	0.177774	0.77693	1.22962	2.12385	KANK1;HDAC5;PSMD12;IRS2;CCNC;PIK3R1;FGF1;PSMA8;FXR1;BAG4;PSMB5;MPRIP;PPP2R1B;MYC;TRIM24;SHOC2;MARK3;POLR2L;FGB;FGA;FN1;ERLIN2;QKI;VAV1;PSMA1;AKAP9;BCL2L1
Base Excision Repair R-HSA-73884	6/72	0.177838	0.77693	1.6394	2.83106	H2AJ;NEIL3;H3-4;H2BC5;H2AC19;MUTYH
CDK-mediated Phosphorylation And Removal Of Cdc6 R-HSA-69017	6/72	0.177838	0.77693	1.6394	2.83106	PSMD12;PSMB5;PSMA1;CCNE1;CDK2;PSMA8
Regulation Of RUNX2 Expression And Activity R-HSA-8939902	6/72	0.177838	0.77693	1.6394	2.83106	PSMD12;PSMB5;PSMA1;CBFB;SKP2;PSMA8
RHOF GTPase Cycle R-HSA-9035034	4/42	0.178372	0.77693	1.89745	3.27097	AKAP12;ARHGAP21;PIK3R1;ESYT1
tRNA Aminoacylation R-HSA-379724	4/42	0.178372	0.77693	1.89745	3.27097	HARS1;NARS1;PPA2;PPA1
NRAGE Signals Death Thru JNK R-HSA-193648	5/57	0.180014	0.77693	1.73361	2.97266	ARHGEF15;PLEKHG5;ITSN1;SOS2;VAV1
Disease R-HSA-1643685	100/1736	0.180515	0.77693	1.11031	1.90079	MTRR;H2AC19;CCNC;IRS2;TTF2;FGF1;ANTXR2;COMT;GJA1;MPRIP;FNTA;NAGLU;PPP2R1B;MYC;TRIM24;GYG2;SKP2;PRKACB;KERA;CDC25A;DPM1;RBP4;NEIL3;CD8B;CCNE1;AKAP9;MASP1;ISCU;NOTCH2;PSMD12;SAR1B;NEDD4L;PIK3R1;SLC6A20;GTF2E2;CRHR1;FXR1;BAG4;SUDS3;ATRIP;MARK3;ARSB;ST3GAL3;GFPT1;FN1;ERLIN2;QKI;CDK2;CHMP2B;RLN3;GCLM;BCL2L1;GPR27;BRCA1;ADAMTSL1;MAP1LC3B;PGM1;YWHAG;JAK1;TOMM70;FGB;FGA;UGT1A1;SIGMAR1;ABCC9;VAV1;DNAJC3;H…
Meiosis R-HSA-1500620	7/88	0.180935	0.77693	1.5587	2.66477	H2AJ;H3-4;H2BC5;MSH5;CDK2;H2AC19;BRCA1
Antigen Presentation: Folding, Assembly, Peptide Loading Of Class I MHC R-HSA-983170	3/28	0.180937	0.77693	2.16251	3.69705	SEC14L3;SAR1B;PIK3C3
Mitophagy R-HSA-5205647	3/28	0.180937	0.77693	2.16251	3.69705	PRKN;TOMM70;MAP1LC3B
Paracetamol ADME R-HSA-9753281	3/28	0.180937	0.77693	2.16251	3.69705	UGT1A1;ABCC5;SULT2A1
Transport Of Inorganic Cations/Anions And Amino Acids/Oligopeptides R-HSA-425393	8/104	0.181864	0.77693	1.50327	2.56231	SLC12A4;SLC26A1;SLC20A2;SLC26A7;SLC5A12;SLC6A20;SLC38A5;SLC7A2
Signaling By Activin R-HSA-1502540	2/15	0.185313	0.77693	2.77157	4.67206	ACVR1C;INHBA
Signaling By FLT3 ITD And TKD Mutants R-HSA-9703648	2/15	0.185313	0.77693	2.77157	4.67206	PIK3R1;BCL2L1
Synthesis Of Prostaglandins (PG) And Thromboxanes (TX) R-HSA-2162123	2/15	0.185313	0.77693	2.77157	4.67206	CBR1;PTGS1
YAP1- And WWTR1 (TAZ)-stimulated Gene Expression R-HSA-2032785	2/15	0.185313	0.77693	2.77157	4.67206	HIPK1;TEAD3
Cellular Response To Hypoxia R-HSA-1234174	6/73	0.185793	0.77693	1.61485	2.71799	EGLN1;PSMD12;PSMB5;PSMA1;WTIP;PSMA8
RHOC GTPase Cycle R-HSA-9013106	6/73	0.185793	0.77693	1.61485	2.71799	ARHGAP21;STARD13;FMNL2;MACO1;PIK3R1;RHOA
Homologous DNA Pairing And Strand Exchange R-HSA-5693579	4/43	0.189078	0.77693	1.8487	3.07918	RAD51D;CHEK1;BRCA1;ATRIP
mRNA 3-End Processing R-HSA-72187	5/58	0.18911	0.77693	1.70081	2.83258	CPSF7;MAGOH;THOC5;WDR33;U2AF1L4
Cell Death Signaling Via NRAGE, NRIF And NADE R-HSA-204998	6/74	0.193884	0.77693	1.59102	2.61005	BEX3;ARHGEF15;PLEKHG5;ITSN1;SOS2;VAV1
NoRC Negatively Regulates rRNA Expression R-HSA-427413	6/74	0.193884	0.77693	1.59102	2.61005	H2AJ;H2BC5;H2AC19;SUDS3;TTF1;POLR2L
FCERI Mediated MAPK Activation R-HSA-2871796	3/29	0.194461	0.77693	2.07923	3.40479	MAPK10;SPNS1;VAV1
G1/S-Specific Transcription R-HSA-69205	3/29	0.194461	0.77693	2.07923	3.40479	CCNE1;CDK1;CDC25A
PIWI-interacting RNA (piRNA) Biogenesis R-HSA-5601884	3/29	0.194461	0.77693	2.07923	3.40479	PIWIL2;TDRD9;POLR2L
Peroxisomal Lipid Metabolism R-HSA-390918	3/29	0.194461	0.77693	2.07923	3.40479	PECR;ACOX1;CRAT
Processing Of Capped Intronless Pre-mRNA R-HSA-75067	3/29	0.194461	0.77693	2.07923	3.40479	LSM10;CPSF7;WDR33
Post-translational Protein Phosphorylation R-HSA-8957275	8/106	0.195185	0.77693	1.47243	2.40567	DNAJC3;FGA;MBTPS1;WFS1;STC2;FN1;ANO8;GPC3
Toll Like Receptor 9 (TLR9) Cascade R-HSA-168138	8/106	0.195185	0.77693	1.47243	2.40567	MAPK10;NLRX1;PPP2R1B;NKIRAS1;NKIRAS2;IRF7;PIK3C3;TLR4
Switching Of Origins To A Post-Replicative State R-HSA-69052	7/90	0.195467	0.77693	1.52097	2.48278	PSMD12;PSMB5;PSMA1;CCNE1;CDK2;SKP2;PSMA8
Death Receptor Signaling R-HSA-73887	10/139	0.197436	0.77693	1.39862	2.26904	BEX3;BAG4;ARHGEF15;PLEKHG5;ITSN1;TNFRSF10B;SOS2;RTN4;RHOA;VAV1
Degradation Of GLI1 By Proteasome R-HSA-5610780	5/59	0.198366	0.77693	1.66923	2.70021	PSMD12;PSMB5;PSMA1;PRKACB;PSMA8
Degradation Of GLI2 By Proteasome R-HSA-5610783	5/59	0.198366	0.77693	1.66923	2.70021	PSMD12;PSMB5;PSMA1;PRKACB;PSMA8
GLI3 Is Processed To GLI3R By Proteasome R-HSA-5610785	5/59	0.198366	0.77693	1.66923	2.70021	PSMD12;PSMB5;PSMA1;PRKACB;PSMA8
RHOQ GTPase Cycle R-HSA-9013406	5/59	0.198366	0.77693	1.66923	2.70021	CDC42;ARHGAP21;GJA1;ITSN1;CDC42EP1
Role Of GTSE1 In G2/M Progression After G2 Checkpoint R-HSA-8852276	5/59	0.198366	0.77693	1.66923	2.70021	PSMD12;PSMB5;PSMA1;CDK1;PSMA8
Interleukin-3, Interleukin-5 And GM-CSF Signaling R-HSA-512988	4/44	0.199981	0.77693	1.80238	2.901	PIK3R1;CRK;VAV1;JAK1
PI3K Cascade R-HSA-109704	4/44	0.199981	0.77693	1.80238	2.901	IRS2;PIK3C3;PIK3R1;FGF1
Sphingolipid De Novo Biosynthesis R-HSA-1660661	4/44	0.199981	0.77693	1.80238	2.901	SPTLC1;ORMDL3;OSBP;CERT1
O-linked Glycosylation R-HSA-5173105	8/107	0.201992	0.77693	1.45748	2.33128	ADAMTSL1;POFUT2;B3GNT8;MUC2;GCNT3;GALNTL6;B4GALT6;ST3GAL3
Activation Of HOX Genes During Differentiation R-HSA-5619507	7/91	0.202901	0.77693	1.50279	2.397	H2AJ;H2BC5;H2AC19;HOXB1;PIAS2;PBX1;POLR2L
Toll Like Receptor 4 (TLR4) Cascade R-HSA-166016	10/140	0.203371	0.77693	1.38779	2.21036	FGB;MAPK10;FGA;NLRX1;PPP2R1B;NKIRAS1;NKIRAS2;IRF7;PTPN4;TLR4
Caspase Activation Via Death Receptors In Presence Of Ligand R-HSA-140534	2/16	0.204818	0.77693	2.57347	4.08058	TNFRSF10B;TLR4
Formation Of ATP By Chemiosmotic Coupling R-HSA-163210	2/16	0.204818	0.77693	2.57347	4.08058	DMAC2L;ATP5MF
Heme Degradation R-HSA-189483	2/16	0.204818	0.77693	2.57347	4.08058	FABP1;UGT1A1
Nucleotide-like (Purinergic) Receptors R-HSA-418038	2/16	0.204818	0.77693	2.57347	4.08058	P2RY6;P2RY2
Plasma Lipoprotein Assembly R-HSA-8963898	2/16	0.204818	0.77693	2.57347	4.08058	SAR1B;PRKACB
Signaling By NTRK3 (TRKC) R-HSA-9034015	2/16	0.204818	0.77693	2.57347	4.08058	PTPRS;PIK3R1
Defective CFTR Causes Cystic Fibrosis R-HSA-5678895	5/60	0.207773	0.77693	1.63879	2.57505	PSMD12;PSMB5;PSMA1;ERLIN2;PSMA8
Meiotic Synapsis R-HSA-1221632	5/60	0.207773	0.77693	1.63879	2.57505	H2AJ;H3-4;H2BC5;H2AC19;BRCA1
Recruitment And ATM-mediated Phosphorylation Of Repair And Signal Proteins At DNA Double Strand Breaks R-HSA-5693565	5/60	0.207773	0.77693	1.63879	2.57505	H3-4;H2BC5;EYA2;EYA3;BRCA1
HS-GAG Biosynthesis R-HSA-2022928	3/30	0.208222	0.77693	2.00212	3.14162	GPC3;GPC5;GPC6
Gene Silencing By RNA R-HSA-211000	8/108	0.208894	0.77693	1.44283	2.25938	PIWIL2;H2AJ;AGO3;H2BC5;H2AC19;TDRD9;ANG;POLR2L
Metabolism Of Amino Acids And Derivatives R-HSA-71291	23/364	0.210886	0.77693	1.2184	1.89636	MPST;GCDH;PSMD12;DDC;MTRR;AADAT;SHMT1;PIPOX;HOGA1;LIAS;SDSL;HNMT;HSD17B10;PSMA8;ALDH4A1;RIDA;PSMB5;AANAT;PSMA1;KYAT1;AGXT;CRYM;SEPHS2
ERCC6 (CSB) And EHMT2 (G9a) Positively Regulate rRNA Expression R-HSA-427389	4/45	0.211066	0.77693	1.75833	2.73523	H2AJ;H2BC5;H2AC19;TTF1
DNA Double Strand Break Response R-HSA-5693606	5/61	0.217323	0.77693	1.60944	2.45661	H3-4;H2BC5;EYA2;EYA3;BRCA1
VEGFA-VEGFR2 Pathway R-HSA-4420097	7/93	0.218086	0.77693	1.46768	2.23509	CDC42;PIK3R1;BAIAP2;PRKACB;CRK;RHOA;VAV1
ABC Transporter Disorders R-HSA-5619084	6/77	0.218917	0.77693	1.52355	2.31437	PSMD12;PSMB5;PSMA1;ABCC9;ERLIN2;PSMA8
Negative Epigenetic Regulation Of rRNA Expression R-HSA-5250941	6/77	0.218917	0.77693	1.52355	2.31437	H2AJ;H2BC5;H2AC19;SUDS3;TTF1;POLR2L
Diseases Associated With TLR Signaling Cascade R-HSA-5602358	3/31	0.222191	0.77693	1.93051	2.90391	FGB;FGA;TLR4
Glutamate Binding, Activation Of AMPA Receptors And Synaptic Plasticity R-HSA-399721	3/31	0.222191	0.77693	1.93051	2.90391	CACNG8;DLG1;CACNG4
Metalloprotease DUBs R-HSA-5689901	3/31	0.222191	0.77693	1.93051	2.90391	H2AC19;BRCA1;STAMBP
HIV Transcription Initiation R-HSA-167161	4/46	0.22232	0.77693	1.71637	2.58081	TAF15;TAF13;GTF2E2;POLR2L
Metabolism Of Proteins R-HSA-392499	107/1890	0.222921	0.77693	1.08883	1.63427	TRRAP;H2AC19;TTF2;PARK7;TTF1;POFUT2;NARS1;MYC;SKP2;ARSA;EIF1AX;FBXO15;ANK2;ANK3;CDC25A;PIAS2;DPM1;PPA2;PPA1;CCNE1;LY6D;STAMBP;PSMD12;SAR1B;NTM;DCUN1D4;LYPD1;UBE2J2;SOCS3;NEU3;BTBD1;STC2;DPH3;ARSG;SUDS3;ARSB;ST3GAL3;HARS1;UBE2H;CNTN5;VDR;WFS1;GFPT1;FN1;INHBA;NAT8;TMEM115;GNAQ;CDK1;UBA1;GALNTL6;PIGS;CPM;THRA;PIGP;MRPL39;CGB3;BRCA1;MRPL35;ADAMTSL1;MRPL3;PPP6C;MRPL1;TMED2;MAN1A1;TMED7;TOMM70;FGA;MRPS…
Aberrant Regulation Of Mitotic G1/S Transition In Cancer Due To RB1 Defects R-HSA-9659787	2/17	0.224529	0.77693	2.40178	3.58766	CCNE1;CDK2
Activation Of IRF3/IRF7 Mediated By TBK1/IKK Epsilon R-HSA-936964	2/17	0.224529	0.77693	2.40178	3.58766	IRF7;TLR4
Acyl Chain Remodelling Of PI R-HSA-1482922	2/17	0.224529	0.77693	2.40178	3.58766	PLAAT3;PLA2G5
Metabolism Of Folate And Pterines R-HSA-196757	2/17	0.224529	0.77693	2.40178	3.58766	MTHFD1;SHMT1
RIP-mediated NFkB Activation Via ZBP1 R-HSA-1810476	2/17	0.224529	0.77693	2.40178	3.58766	NKIRAS1;NKIRAS2
Regulation Of RUNX1 Expression And Activity R-HSA-8934593	2/17	0.224529	0.77693	2.40178	3.58766	CBFB;AGO3
Signaling By Cytosolic FGFR1 Fusion Mutants R-HSA-1839117	2/17	0.224529	0.77693	2.40178	3.58766	TRIM24;PIK3R1
Transmission Across Chemical Synapses R-HSA-112315	16/246	0.226055	0.77693	1.2556	1.86704	GABRB2;KCNJ5;ACTN2;GNAI3;HTR3A;COMT;SYN1;DLG1;CACNG8;GRIN3A;ALDH2;GLRB;PPFIA1;MAPT;PRKACB;CACNG4
Pre-NOTCH Transcription And Translation R-HSA-1912408	5/62	0.227006	0.77693	1.58112	2.34446	NOTCH2;H2AJ;H2BC5;AGO3;H2AC19
RHO GTPases Activate PKNs R-HSA-5625740	5/62	0.227006	0.77693	1.58112	2.34446	H2AJ;H2BC5;H2AC19;YWHAG;RHOA
Autophagy R-HSA-9612973	9/128	0.232715	0.77693	1.36395	1.98856	TOMM70;PRKN;GABARAPL1;MAP1LC3B;RRAGC;LAMP2;CHMP2B;PIK3C3;PARK7
GPCR Downstream Signaling R-HSA-388396	37/619	0.233485	0.77693	1.14915	1.67159	GPR27;CHRM2;ITSN1;PTGER3;MLNR;TAS2R46;GNAI3;PIK3R1;TTF2;CRHR1;ABHD12;CDC42;PROKR2;P2RY6;GRM5;RGS3;PPP2R1B;P2RY2;GNA12;PRKACB;DRD3;PDE8A;ANXA1;XCR1;ARHGEF15;PLEKHG5;OPRM1;HTR5A;RHOA;VAV1;GNAQ;GNRH2;RLN3;PRKCQ;AGXT;PDE7A;SOS2
IRS-mediated Signaling R-HSA-112399	4/47	0.233725	0.77693	1.67637	2.43679	IRS2;PIK3C3;PIK3R1;FGF1
Sensory Perception Of Taste R-HSA-9717189	4/47	0.233725	0.77693	1.67637	2.43679	TAS2R46;SCN2A;SCN3A;SCN1B
Toll-like Receptor Cascades R-HSA-168898	11/162	0.234687	0.77693	1.31405	1.90472	FGB;MAPK10;FGA;NLRX1;PPP2R1B;NKIRAS1;NKIRAS2;IRF7;PIK3C3;PTPN4;TLR4
Inactivation, Recovery And Regulation Of Phototransduction Cascade R-HSA-2514859	3/32	0.236339	0.77693	1.86384	2.68857	FNTA;PRKCQ;GUCA1C
RAF Activation R-HSA-5673000	3/32	0.236339	0.77693	1.86384	2.68857	PPP2R1B;SHOC2;MARK3
RNA Polymerase I Promoter Opening R-HSA-73728	3/32	0.236339	0.77693	1.86384	2.68857	H2AJ;H2BC5;H2AC19
Thrombin Signaling Thru Proteinase Activated Receptors (PARs) R-HSA-456926	3/32	0.236339	0.77693	1.86384	2.68857	GNAQ;GNA12;TTF2
Cytosolic Sensors Of Pathogen-Associated DNA R-HSA-1834949	5/63	0.236812	0.77693	1.55378	2.2382	NKIRAS1;NKIRAS2;TREX1;IRF7;POLR2L
Activated NTRK2 Signals Thru CDK5 R-HSA-9032845	1/5	0.236972	0.77693	4.50166	6.48155	NTRK2
Arachidonate Production From DAG R-HSA-426048	1/5	0.236972	0.77693	4.50166	6.48155	ABHD12
Defective LFNG Causes SCDO3 R-HSA-5083630	1/5	0.236972	0.77693	4.50166	6.48155	NOTCH2
Dopamine Receptors R-HSA-390651	1/5	0.236972	0.77693	4.50166	6.48155	DRD3
Ficolins Bind To Repetitive Carbohydrate Structures On Target Cell Surface R-HSA-2855086	1/5	0.236972	0.77693	4.50166	6.48155	MASP1
Fructose Catabolism R-HSA-70350	1/5	0.236972	0.77693	4.50166	6.48155	ALDH1A1
G2 Phase R-HSA-68911	1/5	0.236972	0.77693	4.50166	6.48155	CDK2
G2/M DNA Replication Checkpoint R-HSA-69478	1/5	0.236972	0.77693	4.50166	6.48155	CDK1
IRS Activation R-HSA-74713	1/5	0.236972	0.77693	4.50166	6.48155	IRS2
MECP2 Regulates Transcription Factors R-HSA-9022707	1/5	0.236972	0.77693	4.50166	6.48155	RBFOX1
Muscarinic Acetylcholine Receptors R-HSA-390648	1/5	0.236972	0.77693	4.50166	6.48155	CHRM2
N-glycan Trimming And Elongation In cis-Golgi R-HSA-964739	1/5	0.236972	0.77693	4.50166	6.48155	MAN1A1
NGF-independant TRKA Activation R-HSA-187024	1/5	0.236972	0.77693	4.50166	6.48155	NTRK2
PKA-mediated Phosphorylation Of Key Metabolic Factors R-HSA-163358	1/5	0.236972	0.77693	4.50166	6.48155	PRKACB
RHOT1 GTPase Cycle R-HSA-9013425	1/5	0.236972	0.77693	4.50166	6.48155	MYO19
RUNX1 Regulates Expression Of Components Of Tight Junctions R-HSA-8935964	1/5	0.236972	0.77693	4.50166	6.48155	CBFB
RUNX1 Regulates Transcription Of Genes Involved In Interleukin Signaling R-HSA-8939247	1/5	0.236972	0.77693	4.50166	6.48155	CBFB
RUNX2 Regulates Chondrocyte Maturation R-HSA-8941284	1/5	0.236972	0.77693	4.50166	6.48155	CBFB
SARS-CoV-2 Targets PDZ Proteins In Cell-Cell Junction R-HSA-9705677	1/5	0.236972	0.77693	4.50166	6.48155	GJA1
SUMO Is Proteolytically Processed R-HSA-3065679	1/5	0.236972	0.77693	4.50166	6.48155	SENP2
Signaling By MST1 R-HSA-8852405	1/5	0.236972	0.77693	4.50166	6.48155	HPN
Signaling By Membrane-Tethered Fusions Of PDGFRA Or PDGFRB R-HSA-9673768	1/5	0.236972	0.77693	4.50166	6.48155	KANK1
Sodium-coupled Phosphate Cotransporters R-HSA-427652	1/5	0.236972	0.77693	4.50166	6.48155	SLC20A2
TFAP2 (AP-2) Family Regulates Transcription Of Cell Cycle Factors R-HSA-8866911	1/5	0.236972	0.77693	4.50166	6.48155	MYC
Toxicity Of Botulinum Toxin Type D (botD) R-HSA-5250955	1/5	0.236972	0.77693	4.50166	6.48155	SV2B
Toxicity Of Botulinum Toxin Type F (botF) R-HSA-5250981	1/5	0.236972	0.77693	4.50166	6.48155	SV2B
Vitamin B1 (Thiamin) Metabolism R-HSA-196819	1/5	0.236972	0.77693	4.50166	6.48155	SLC19A3
tRNA Processing In Mitochondrion R-HSA-6785470	1/5	0.236972	0.77693	4.50166	6.48155	HSD17B10
MyD88:MAL(TIRAP) Cascade Initiated On Plasma Membrane R-HSA-166058	8/112	0.237371	0.77693	1.38704	1.99475	FGB;MAPK10;FGA;NLRX1;PPP2R1B;NKIRAS1;NKIRAS2;TLR4
RNA Polymerase II Transcription R-HSA-73857	75/1312	0.24129	0.77693	1.09792	1.56098	CITED1;THRA;ICE2;TACO1;H2AC19;ZC3H8;CCNC;CGB3;BRCA1;NR2E1;LSM10;PPP2R1B;MYC;CHEK1;MAGOH;RSPO3;ZNF446;SKP2;YWHAG;TEAD3;ZNF682;RBFOX1;OPRM1;THOC5;MED7;WDR33;H2AJ;RAD51D;PSMA1;RRAGC;CCNE1;ZNF317;PRKCQ;ZNF596;NOTCH2;HDAC5;PSMD12;CBFB;ZNF195;NEDD4L;GLYAT;GATA1;NDRG1;NR2C1;GTF2E2;PSMA8;U2AF1L4;SOCS3;PSMB5;PDZD2;RFFL;ATRIP;ZNF267;POLR2L;WWOX;CDKN2B;CPSF7;ZNF460;TAF15;H2BC5;VDR;TAF13;GADD45A;EAF1;TNFRSF1…
MECP2 Regulates Neuronal Receptors And Channels R-HSA-9022699	2/18	0.24437	0.77693	2.25155	3.17259	OPRM1;PTPN4
Metabolism Of Amine-Derived Hormones R-HSA-209776	2/18	0.24437	0.77693	2.25155	3.17259	DDC;AANAT
PI-3K cascade:FGFR3 R-HSA-5654710	2/18	0.24437	0.77693	2.25155	3.17259	PIK3R1;FGF1
Serotonin Neurotransmitter Release Cycle R-HSA-181429	2/18	0.24437	0.77693	2.25155	3.17259	PPFIA1;SYN1
TP53 Regulates Transcription Of Genes Involved In G2 Cell Cycle Arrest R-HSA-6804114	2/18	0.24437	0.77693	2.25155	3.17259	GADD45A;CDK1
Regulation Of APC/C Activators Between G1/S And Early Anaphase R-HSA-176408	6/80	0.244958	0.77693	1.46155	2.05592	PSMD12;PSMB5;PSMA1;CDK2;CDK1;PSMA8
Cross-presentation Of Soluble Exogenous Antigens (Endosomes) R-HSA-1236978	4/48	0.245268	0.77693	1.63818	2.30231	PSMD12;PSMB5;PSMA1;PSMA8
NOTCH1 Intracellular Domain Regulates Transcription R-HSA-2122947	4/48	0.245268	0.77693	1.63818	2.30231	HDAC5;TLE1;MYC;CCNC
Fc Epsilon Receptor (FCERI) Signaling R-HSA-2454202	9/130	0.2463	0.77693	1.34127	1.87939	MAPK10;PSMD12;PSMB5;PSMA1;SPNS1;PRKCQ;PIK3R1;VAV1;PSMA8
Hedgehog Ligand Biogenesis R-HSA-5358346	5/64	0.246733	0.77693	1.52736	2.13747	PSMD12;PSMB5;PSMA1;GPC5;PSMA8
Transport To Golgi And Subsequent Modification R-HSA-948021	11/164	0.246747	0.77693	1.29674	1.81465	PPP6C;RAB1A;TMEM115;SAR1B;GOSR1;TMED2;ANK2;MAN1A1;ANK3;TMED7;B4GALT6
Amino Acid Transport Across Plasma Membrane R-HSA-352230	3/33	0.250636	0.77693	1.80162	2.493	SLC6A20;SLC7A2;SLC38A5
Diseases Of Carbohydrate Metabolism R-HSA-5663084	3/33	0.250636	0.77693	1.80162	2.493	NAGLU;GYG2;ARSB
Phototransduction Cascade R-HSA-2514856	3/33	0.250636	0.77693	1.80162	2.493	FNTA;PRKCQ;GUCA1C
Immune System R-HSA-168256	109/1943	0.25139	0.77693	1.07741	1.48764	CNTFR;UBE2D4;IRS2;TTF2;CLU;IL27RA;PPP2R1B;MYC;LAMP2;TOM1;EPPIN;SKP2;PRKACB;NANOS1;ARSA;NHLRC3;FBXO15;MID1;CD8B;SPNS1;TRIM14;PRKCQ;MASP1;PSMD12;NLRX1;CFH;SAR1B;MGST1;NEDD4L;UBR2;LPO;PIK3R1;GLYAT;UBE2J2;SOCS3;SEC14L3;SYNGR1;PDZD2;BTBD1;RNF217;ARSB;CD99;MCL1;ATP6V1F;UBE2H;HACE1;TREX1;FN1;LNPEP;NAT8;BCL6;UBA1;EIF4G2;BCL2L1;PYGB;TREM1;IL18BP;NKIRAS1;STBD1;NKIRAS2;CASP4;ARIH1;CTSF;CTSE;PGM1;JAK1;TOMM70…
G2/M Transition R-HSA-69275	12/182	0.251884	0.77693	1.27323	1.75551	PSMD12;PSMB5;PPP2R1B;PSMA1;HAUS8;AKAP9;CDK2;CDK1;CDC25A;YWHAG;MZT1;PSMA8
Neurotransmitter Receptors And Postsynaptic Signal Transmission R-HSA-112314	12/182	0.251884	0.77693	1.27323	1.75551	GABRB2;KCNJ5;DLG1;CACNG8;GRIN3A;GLRB;ACTN2;GNAI3;HTR3A;MAPT;PRKACB;CACNG4
Macroautophagy R-HSA-1632852	8/114	0.252086	0.77693	1.36073	1.87507	TOMM70;PRKN;GABARAPL1;MAP1LC3B;RRAGC;CHMP2B;PIK3C3;PARK7
DDX58/IFIH1-mediated Induction Of Interferon-Alpha/Beta R-HSA-168928	6/81	0.253833	0.77693	1.44199	1.97708	TOMM70;NLRX1;PDZD2;NKIRAS1;NKIRAS2;IRF7
Mitochondrial Protein Import R-HSA-1268020	5/65	0.256759	0.77693	1.50183	2.04191	TOMM70;CHCHD3;MTX1;GFER;COA6
Regulation Of RAS By GAPs R-HSA-5658442	5/65	0.256759	0.77693	1.50183	2.04191	PSMD12;PSMB5;PSMA1;RASA3;PSMA8
Regulation Of Activated PAK-2p34 By Proteasome Mediated Degradation R-HSA-211733	4/49	0.256933	0.77693	1.60169	2.17661	PSMD12;PSMB5;PSMA1;PSMA8
Signaling By FGFR1 R-HSA-5654736	4/49	0.256933	0.77693	1.60169	2.17661	SPRY2;PIK3R1;FGF1;FGFRL1
TP53 Regulates Transcription Of Cell Cycle Genes R-HSA-6791312	4/49	0.256933	0.77693	1.60169	2.17661	CCNE1;GADD45A;CDK2;CDK1
Cell Cycle Checkpoints R-HSA-69620	17/271	0.262331	0.77693	1.20763	1.61599	PSMD12;H2BC5;BRCA1;CDC25A;SKA2;PSMA8;SGO2;PSMB5;H3-4;PPP2R1B;PSMA1;CCNE1;CHEK1;CDK2;CDK1;ATRIP;YWHAG
Mitotic G2-G2/M Phases R-HSA-453274	12/184	0.26363	0.77693	1.25829	1.67757	PSMD12;PSMB5;PPP2R1B;PSMA1;HAUS8;AKAP9;CDK2;CDK1;CDC25A;YWHAG;MZT1;PSMA8
Assembly Of Active LPL And LIPC Lipase Complexes R-HSA-8963889	2/19	0.264274	0.77693	2.11899	2.81989	MBTPS1;LPL
Initiation Of Nuclear Envelope (NE) Reformation R-HSA-2995383	2/19	0.264274	0.77693	2.11899	2.81989	CDK1;VRK2
Ras Activation Upon Ca2+ Influx Thru NMDA Receptor R-HSA-442982	2/19	0.264274	0.77693	2.11899	2.81989	DLG1;ACTN2
Signaling By FGFR2 IIIa TM R-HSA-8851708	2/19	0.264274	0.77693	2.11899	2.81989	FGF1;POLR2L
Signaling By PDGFR In Disease R-HSA-9671555	2/19	0.264274	0.77693	2.11899	2.81989	KANK1;PIK3R1
Transcription Of E2F Targets Under Negative Control By DREAM Complex R-HSA-1362277	2/19	0.264274	0.77693	2.11899	2.81989	MYC;CDC25A
CD28 Co-Stimulation R-HSA-389356	3/34	0.265055	0.77693	1.74341	2.31493	CDC42;PIK3R1;VAV1
DNA Methylation R-HSA-5334118	3/34	0.265055	0.77693	1.74341	2.31493	H2AJ;H2BC5;H2AC19
EPHB-mediated Forward Signaling R-HSA-3928662	3/34	0.265055	0.77693	1.74341	2.31493	CDC42;ITSN1;RHOA
Resolution Of D-Loop Structures R-HSA-5693537	3/34	0.265055	0.77693	1.74341	2.31493	RTEL1;RAD51D;BRCA1
ER To Golgi Anterograde Transport R-HSA-199977	9/133	0.267162	0.77693	1.30861	1.72723	PPP6C;RAB1A;TMEM115;SAR1B;GOSR1;TMED2;ANK2;ANK3;TMED7
Neddylation R-HSA-8951664	15/237	0.267843	0.77693	1.21889	1.6057	PSMD12;FEM1B;DCUN1D4;FBXO15;FBXL16;LRRC41;PSMA8;SPSB2;SOCS3;PSMB5;PSMA1;BTBD1;ASB10;FEM1C;SKP2
Ion Homeostasis R-HSA-5578775	4/50	0.268705	0.77693	1.56679	2.05899	RYR1;NANOS1;ASPH;ABCC9
Regulation Of Ornithine Decarboxylase (ODC) R-HSA-350562	4/50	0.268705	0.77693	1.56679	2.05899	PSMD12;PSMB5;PSMA1;PSMA8
Metabolism Of Vitamins And Cofactors R-HSA-196854	12/186	0.275557	0.77693	1.2437	1.60308	CYB5A;RBP4;MTRR;MTHFD1;PCCA;SHMT1;SLC19A3;GPC3;LPL;GPC5;MOCS1;GPC6
Collagen Biosynthesis And Modifying Enzymes R-HSA-1650814	5/67	0.277088	0.77693	1.45323	1.8651	COL4A2;PCOLCE2;COL25A1;COL4A1;PLOD2
HDR Thru Homologous Recombination (HRR) R-HSA-5685942	5/67	0.277088	0.77693	1.45323	1.8651	RAD51D;RTEL1;CHEK1;BRCA1;ATRIP
Regulation Of PTEN Stability And Activity R-HSA-8948751	5/67	0.277088	0.77693	1.45323	1.8651	PREX2;PSMD12;PSMB5;PSMA1;PSMA8
Activated NTRK2 Signals Thru FYN R-HSA-9032500	1/6	0.277155	0.77693	3.60114	4.6209	NTRK2
Activated NTRK3 Signals Thru PI3K R-HSA-9603381	1/6	0.277155	0.77693	3.60114	4.6209	PIK3R1
Activation Of TRKA Receptors R-HSA-187015	1/6	0.277155	0.77693	3.60114	4.6209	NTRK2
Alpha-oxidation Of Phytanate R-HSA-389599	1/6	0.277155	0.77693	3.60114	4.6209	PECR
Cobalamin (Cbl) Metabolism R-HSA-9759218	1/6	0.277155	0.77693	3.60114	4.6209	MTRR
FGFR1b Ligand Binding And Activation R-HSA-190370	1/6	0.277155	0.77693	3.60114	4.6209	FGF1
Fibronectin Matrix Formation R-HSA-1566977	1/6	0.277155	0.77693	3.60114	4.6209	FN1
Lipid Particle Organization R-HSA-8964572	1/6	0.277155	0.77693	3.60114	4.6209	HILPDA
MET Receptor Activation R-HSA-6806942	1/6	0.277155	0.77693	3.60114	4.6209	HPN
MET Activates PI3K/AKT Signaling R-HSA-8851907	1/6	0.277155	0.77693	3.60114	4.6209	PIK3R1
Molybdenum Cofactor Biosynthesis R-HSA-947581	1/6	0.277155	0.77693	3.60114	4.6209	MOCS1
NADE Modulates Death Signaling R-HSA-205025	1/6	0.277155	0.77693	3.60114	4.6209	BEX3
Phenylalanine Metabolism R-HSA-8964208	1/6	0.277155	0.77693	3.60114	4.6209	KYAT1
Phosphorylation Of Emi1 R-HSA-176417	1/6	0.277155	0.77693	3.60114	4.6209	CDK1
Pre-NOTCH Processing In Endoplasmic Reticulum R-HSA-1912399	1/6	0.277155	0.77693	3.60114	4.6209	NOTCH2
Protein Repair R-HSA-5676934	1/6	0.277155	0.77693	3.60114	4.6209	MSRB2
RUNX1 Regulates Estrogen Receptor Mediated Transcription R-HSA-8931987	1/6	0.277155	0.77693	3.60114	4.6209	CBFB
RUNX1 Regulates Transcription Of Genes Involved In BCR Signaling R-HSA-8939245	1/6	0.277155	0.77693	3.60114	4.6209	CBFB
RUNX3 Regulates Immune Response And Cell Migration R-HSA-8949275	1/6	0.277155	0.77693	3.60114	4.6209	CBFB
SOS-mediated Signaling R-HSA-112412	1/6	0.277155	0.77693	3.60114	4.6209	IRS2
Synthesis Of 15-Eicosatetraenoic Acid Derivatives R-HSA-2142770	1/6	0.277155	0.77693	3.60114	4.6209	GPX1
Transport And Synthesis Of PAPS R-HSA-174362	1/6	0.277155	0.77693	3.60114	4.6209	SLC26A1
rRNA Modification In Mitochondrion R-HSA-6793080	1/6	0.277155	0.77693	3.60114	4.6209	MTERF4
Transport Of Small Molecules R-HSA-382551	41/706	0.27855	0.77693	1.1138	1.4236	RYR1;PSMD12;SLC26A1;SLC44A4;SLC20A2;ABCB7;SAR1B;SLC5A11;NEDD4L;SLC5A12;AQP7;LPL;SLC5A10;ABCC10;SLC6A20;SLC7A2;PSMA8;CYB5R1;PSMB5;ATP7B;BSND;PRKACB;ATP9B;SLC38A5;ATP6V1F;MBTPS1;SLC12A4;SLC35A3;PEX19;ABCC5;SLC2A12;ANO8;SLC39A10;ANO6;ABCC9;ERLIN2;ANO5;PSMA1;ASPH;TRPV6;SLC26A7
Transcriptional Regulation By RUNX1 R-HSA-8878171	13/204	0.278845	0.77693	1.22749	1.56762	PSMD12;H2BC5;CBFB;H2AC19;GATA1;PSMA8;SOCS3;H2AJ;PSMB5;AGO3;PSMA1;RSPO3;PRKCQ
Interleukin-1 Family Signaling R-HSA-446652	10/152	0.27979	0.77693	1.2697	1.61723	IL1RL1;PSMD12;NLRX1;PSMB5;PSMA1;NKIRAS1;NKIRAS2;PTPN4;IL18BP;PSMA8
Autodegradation Of E3 Ubiquitin Ligase COP1 R-HSA-349425	4/51	0.28057	0.77693	1.53338	1.94881	PSMD12;PSMB5;PSMA1;PSMA8
IRS-related Events Triggered By IGF1R R-HSA-2428928	4/51	0.28057	0.77693	1.53338	1.94881	IRS2;PIK3C3;PIK3R1;FGF1
Nonhomologous End-Joining (NHEJ) R-HSA-5693571	4/51	0.28057	0.77693	1.53338	1.94881	DCLRE1C;H3-4;H2BC5;BRCA1
Transcriptional Activity Of SMAD2/SMAD3:SMAD4 Heterotrimer R-HSA-2173793	4/51	0.28057	0.77693	1.53338	1.94881	CDKN2B;MYC;NEDD4L;CCNC
Ubiquitin-dependent Degradation Of Cyclin D R-HSA-75815	4/51	0.28057	0.77693	1.53338	1.94881	PSMD12;PSMB5;PSMA1;PSMA8
Vpu Mediated Degradation Of CD4 R-HSA-180534	4/51	0.28057	0.77693	1.53338	1.94881	PSMD12;PSMB5;PSMA1;PSMA8
Chaperone Mediated Autophagy R-HSA-9613829	2/20	0.284178	0.77693	2.00116	2.51777	LAMP2;PARK7
NOTCH4 Intracellular Domain Regulates Transcription R-HSA-9013695	2/20	0.284178	0.77693	2.00116	2.51777	NOTCH2;FLT4
PI-3K cascade:FGFR4 R-HSA-5654720	2/20	0.284178	0.77693	2.00116	2.51777	PIK3R1;FGF1
Processing Of Intronless Pre-mRNAs R-HSA-77595	2/20	0.284178	0.77693	2.00116	2.51777	CPSF7;WDR33
Receptor-type Tyrosine-Protein Phosphatases R-HSA-388844	2/20	0.284178	0.77693	2.00116	2.51777	PTPRS;PPFIA1
Regulation Of FZD By Ubiquitination R-HSA-4641263	2/20	0.284178	0.77693	2.00116	2.51777	RSPO2;RSPO3
Cell Cycle R-HSA-1640170	38/654	0.286607	0.77693	1.1141	1.39223	RAB1A;RTEL1;PSMD12;H2AC19;BRCA1;ARPP19;SKA2;PSMA8;PPP6C;PSMB5;CHTF8;TERT;HAUS8;PPP2R1B;MYC;CHEK1;SKP2;ATRIP;YWHAG;POLR2L;CDKN2B;H2BC5;NEK7;DYRK1A;VRK2;MZT1;CDC25A;SGO2;H2AJ;H3-4;PSMA1;CCNE1;MSH5;CDK2;AKAP9;CHMP2B;CDK1;MCPH1
ESR-mediated Signaling R-HSA-8939211	12/188	0.287652	0.77693	1.22943	1.53188	KANK1;H2AJ;CBFB;AGO3;CITED1;H2BC5;MYC;H2AC19;GNAI3;ZNF217;PIK3R1;POLR2L
MyD88 Dependent Cascade Initiated On Endosome R-HSA-975155	7/102	0.290722	0.77693	1.32801	1.6406	MAPK10;NLRX1;PPP2R1B;NKIRAS1;NKIRAS2;IRF7;TLR4
IGF1R Signaling Cascade R-HSA-2428924	4/52	0.292514	0.77693	1.50135	1.84552	IRS2;PIK3C3;PIK3R1;FGF1
SARS-CoV-1 Infection R-HSA-9678108	4/52	0.292514	0.77693	1.50135	1.84552	MAP1LC3B;CHMP2B;PIK3C3;ST3GAL3
Signaling By PDGF R-HSA-186797	4/52	0.292514	0.77693	1.50135	1.84552	COL4A2;COL4A1;PIK3R1;CRK
Aberrant Regulation Of Mitotic Cell Cycle Due To RB1 Defects R-HSA-9687139	3/36	0.294154	0.77693	1.63758	2.00382	CCNE1;CDK2;SKP2
Activated PKN1 Stimulates Transcription Of Androgen Receptor Regulated KLK2 And KLK3 R-HSA-5625886	3/36	0.294154	0.77693	1.63758	2.00382	H2AJ;H2BC5;H2AC19
ROS And RNS Production In Phagocytes R-HSA-1222556	3/36	0.294154	0.77693	1.63758	2.00382	NANOS1;LPO;ATP6V1F
SMAD2/SMAD3:SMAD4 Heterotrimer Regulates Transcription R-HSA-2173796	3/36	0.294154	0.77693	1.63758	2.00382	CDKN2B;MYC;CCNC
Glycolysis R-HSA-70171	5/69	0.297728	0.77693	1.40767	1.70549	PFKFB3;PPP2R1B;ADPGK;MAP4K5;PRKACB
Cell-Cell Communication R-HSA-1500931	8/120	0.297785	0.77693	1.28742	1.55956	ACTN2;CLDN8;SIRPG;MAGI2;ILK;ANG;PIK3R1;NECTIN1
Toll Like Receptor 7/8 (TLR7/8) Cascade R-HSA-168181	7/103	0.299134	0.77693	1.3141	1.58594	MAPK10;NLRX1;PPP2R1B;NKIRAS1;NKIRAS2;IRF7;TLR4
DNA Replication R-HSA-69306	10/155	0.300121	0.77693	1.24323	1.49632	PSMD12;H2AJ;PSMB5;PSMA1;H2BC5;CCNE1;CDK2;H2AC19;SKP2;PSMA8
Azathioprine ADME R-HSA-9748787	2/21	0.304028	0.77693	1.89574	2.25714	ABCC5;VAV1
Cellular Hexose Transport R-HSA-189200	2/21	0.304028	0.77693	1.89574	2.25714	SLC2A12;SLC5A10
Defects In Vitamin And Cofactor Metabolism R-HSA-3296482	2/21	0.304028	0.77693	1.89574	2.25714	MTRR;PCCA
Interleukin-37 Signaling R-HSA-9008059	2/21	0.304028	0.77693	1.89574	2.25714	PTPN4;IL18BP
Negative Regulation Of NMDA Receptor-Mediated Neuronal Transmission R-HSA-9617324	2/21	0.304028	0.77693	1.89574	2.25714	DLG1;ACTN2
PI-3K cascade:FGFR1 R-HSA-5654689	2/21	0.304028	0.77693	1.89574	2.25714	PIK3R1;FGF1
Signaling By FGFR3 In Disease R-HSA-5655332	2/21	0.304028	0.77693	1.89574	2.25714	PIK3R1;FGF1
Synaptic Adhesion-Like Molecules R-HSA-8849932	2/21	0.304028	0.77693	1.89574	2.25714	DLG1;PTPRS
Unblocking Of NMDA Receptors, Glutamate Binding And Activation R-HSA-438066	2/21	0.304028	0.77693	1.89574	2.25714	DLG1;ACTN2
ZBP1(DAI) Mediated Induction Of Type I IFNs R-HSA-1606322	2/21	0.304028	0.77693	1.89574	2.25714	NKIRAS1;NKIRAS2
Insulin Receptor Signaling Cascade R-HSA-74751	4/53	0.304523	0.77693	1.47063	1.7486	IRS2;PIK3C3;PIK3R1;FGF1
Nuclear Receptor Transcription Pathway R-HSA-383280	4/53	0.304523	0.77693	1.47063	1.7486	THRA;VDR;NR2E1;NR2C1
Signaling By Type 1 Insulin-like Growth Factor 1 Receptor (IGF1R) R-HSA-2404192	4/53	0.304523	0.77693	1.47063	1.7486	IRS2;PIK3C3;PIK3R1;FGF1
Vif-mediated Degradation Of APOBEC3G R-HSA-180585	4/53	0.304523	0.77693	1.47063	1.7486	PSMD12;PSMB5;PSMA1;PSMA8
Adaptive Immune System R-HSA-1280218	42/733	0.305892	0.77693	1.09755	1.30008	PRKN;PSMD12;UBE2D4;SAR1B;NEDD4L;UBR2;RNF6;PIK3R1;UBE2J2;TREM1;PSMA8;CDC42;SOCS3;SEC14L3;PSMB5;BTBD1;PPP2R1B;ASB10;RNF217;CTSF;SKP2;CTSE;PRKACB;CD99;FGB;FGA;UBE2H;HACE1;FBXO15;LNPEP;FBXL16;LRRC41;VAV1;PJA1;SPSB2;PSMA1;CD8B;SPNS1;PRKCQ;PIK3C3;UBA1;TLR4
Formation Of Fibrin Clot (Clotting Cascade) R-HSA-140877	3/37	0.308785	0.77693	1.58933	1.86764	FGB;FGA;TTF2
NCAM1 Interactions R-HSA-419037	3/37	0.308785	0.77693	1.58933	1.86764	COL4A2;COL4A1;CACNA1G
SIRT1 Negatively Regulates rRNA Expression R-HSA-427359	3/37	0.308785	0.77693	1.58933	1.86764	H2AJ;H2BC5;H2AC19
PTEN Regulation R-HSA-6807070	9/139	0.310336	0.77693	1.24781	1.46006	PREX2;HDAC5;PSMD12;PSMB5;RRAGC;AGO3;PSMA1;NR2E1;PSMA8
ARMS-mediated Activation R-HSA-170984	1/7	0.315225	0.77693	3.00079	3.46432	CRK
Activated NTRK2 Signals Thru RAS R-HSA-9026519	1/7	0.315225	0.77693	3.00079	3.46432	NTRK2
Cation-coupled Chloride Cotransporters R-HSA-426117	1/7	0.315225	0.77693	3.00079	3.46432	SLC12A4
DEx/H-box Helicases Activate Type I IFN And Inflammatory Cytokines Production R-HSA-3134963	1/7	0.315225	0.77693	3.00079	3.46432	IRF7
Defective HLCS Causes Multiple Carboxylase Deficiency R-HSA-3371599	1/7	0.315225	0.77693	3.00079	3.46432	PCCA
Defective Factor VIII Causes Hemophilia A R-HSA-9662001	1/7	0.315225	0.77693	3.00079	3.46432	TTF2
Erythropoietin Activates Phospholipase C Gamma (PLCG) R-HSA-9027277	1/7	0.315225	0.77693	3.00079	3.46432	IRS2
Erythropoietin Activates STAT5 R-HSA-9027283	1/7	0.315225	0.77693	3.00079	3.46432	IRS2
FGFR3b Ligand Binding And Activation R-HSA-190371	1/7	0.315225	0.77693	3.00079	3.46432	FGF1
Fructose Metabolism R-HSA-5652084	1/7	0.315225	0.77693	3.00079	3.46432	ALDH1A1
HDL Assembly R-HSA-8963896	1/7	0.315225	0.77693	3.00079	3.46432	PRKACB
Inactivation Of CDC42 And RAC1 R-HSA-428543	1/7	0.315225	0.77693	3.00079	3.46432	CDC42
Insulin-like Growth Factor-2 mRNA Binding Proteins (IGF2BPs/IMPs/VICKZs) Bind RNA R-HSA-428359	1/7	0.315225	0.77693	3.00079	3.46432	MYC
Nectin/Necl Trans Heterodimerization R-HSA-420597	1/7	0.315225	0.77693	3.00079	3.46432	NECTIN1
Nef Mediated CD8 Down-regulation R-HSA-182218	1/7	0.315225	0.77693	3.00079	3.46432	CD8B
NrCAM Interactions R-HSA-447038	1/7	0.315225	0.77693	3.00079	3.46432	DLG1
PP2A-mediated Dephosphorylation Of Key Metabolic Factors R-HSA-163767	1/7	0.315225	0.77693	3.00079	3.46432	PPP2R1B
Post-transcriptional Silencing By Small RNAs R-HSA-426496	1/7	0.315225	0.77693	3.00079	3.46432	AGO3
RHOT2 GTPase Cycle R-HSA-9013419	1/7	0.315225	0.77693	3.00079	3.46432	MYO19
RUNX1 Regulates Transcription Of Genes Involved In Differentiation Of Myeloid Cells R-HSA-8939246	1/7	0.315225	0.77693	3.00079	3.46432	CBFB
Release Of Apoptotic Factors From Mitochondria R-HSA-111457	1/7	0.315225	0.77693	3.00079	3.46432	SEPTIN4
Synthesis Of 12-Eicosatetraenoic Acid Derivatives R-HSA-2142712	1/7	0.315225	0.77693	3.00079	3.46432	GPX1
TYSND1 Cleaves Peroxisomal Proteins R-HSA-9033500	1/7	0.315225	0.77693	3.00079	3.46432	ACOX1
Terminal Pathway Of Complement R-HSA-166665	1/7	0.315225	0.77693	3.00079	3.46432	CLU
Vitamin C (Ascorbate) Metabolism R-HSA-196836	1/7	0.315225	0.77693	3.00079	3.46432	CYB5A
Ion Channel Transport R-HSA-983712	11/175	0.316537	0.77693	1.20906	1.39079	RYR1;ATP7B;TRPV6;ASPH;ANO8;BSND;NEDD4L;ANO6;ANO5;ATP9B;ATP6V1F
AUF1 (hnRNP D0) Binds And Destabilizes mRNA R-HSA-450408	4/54	0.316582	0.77693	1.44114	1.65756	PSMD12;PSMB5;PSMA1;PSMA8
Degradation Of AXIN R-HSA-4641257	4/54	0.316582	0.77693	1.44114	1.65756	PSMD12;PSMB5;PSMA1;PSMA8
FBXL7 Down-Regulates AURKA During Mitotic Entry And In Early Mitosis R-HSA-8854050	4/54	0.316582	0.77693	1.44114	1.65756	PSMD12;PSMB5;PSMA1;PSMA8
Interleukin-12 Family Signaling R-HSA-447115	4/54	0.316582	0.77693	1.44114	1.65756	CDC42;ANXA2;IL27RA;JAK1
Regulation Of RUNX3 Expression And Activity R-HSA-8941858	4/54	0.316582	0.77693	1.44114	1.65756	PSMD12;PSMB5;PSMA1;CBFB
SCF-beta-TrCP Mediated Degradation Of Emi1 R-HSA-174113	4/54	0.316582	0.77693	1.44114	1.65756	PSMD12;PSMB5;PSMA1;PSMA8
PCP/CE Pathway R-HSA-4086400	6/88	0.318026	0.77693	1.3184	1.51039	PSMD12;PSMB5;WNT11;PSMA1;RHOA;PSMA8
Assembly Of ORC Complex At Origin Of Replication R-HSA-68616	3/38	0.323438	0.77693	1.54384	1.7426	H2AJ;H2BC5;H2AC19
Diseases Of Mitotic Cell Cycle R-HSA-9675126	3/38	0.323438	0.77693	1.54384	1.7426	CCNE1;CDK2;SKP2
Acyl Chain Remodelling Of PS R-HSA-1482801	2/22	0.323773	0.77693	1.80086	2.03085	PLAAT3;PLA2G5
E2F Mediated Regulation Of DNA Replication R-HSA-113510	2/22	0.323773	0.77693	1.80086	2.03085	PPP2R1B;CDK1
Insertion Of Tail-Anchored Proteins Into Endoplasmic Reticulum Membrane R-HSA-9609523	2/22	0.323773	0.77693	1.80086	2.03085	CYB5A;UBE2J2
RA Biosynthesis Pathway R-HSA-5365859	2/22	0.323773	0.77693	1.80086	2.03085	ALDH1A1;RDH5
Cytokine Signaling In Immune System R-HSA-1280215	40/702	0.324149	0.77693	1.09066	1.22868	CNTFR;PSMD12;NLRX1;IRS2;PIK3R1;IL18BP;PSMA8;IL27RA;CDC42;SOCS3;IL1RL1;PSMB5;PDZD2;PTPRZ1;PPP2R1B;NKIRAS1;MYC;NKIRAS2;ARIH1;JAK1;MCL1;IL11;ANXA1;ANXA2;MMP1;FN1;IL17RE;OPRM1;MID1;VAV1;MAPK10;PSMA1;BCL6;IRF7;TRIM14;PTPN4;CRK;SOS2;EIF4G2;BCL2L1
Glucose Metabolism R-HSA-70326	6/89	0.327415	0.77693	1.30245	1.45422	G6PC2;PFKFB3;PPP2R1B;ADPGK;MAP4K5;PRKACB
Mitochondrial Biogenesis R-HSA-1592230	6/89	0.327415	0.77693	1.30245	1.45422	DMAC2L;CHCHD3;ACSS2;MTX1;DNAJC11;ATP5MF
Complement Cascade R-HSA-166658	4/55	0.32868	0.77693	1.41281	1.572	CFH;TTF2;MASP1;CLU
Degradation Of DVL R-HSA-4641258	4/55	0.32868	0.77693	1.41281	1.572	PSMD12;PSMB5;PSMA1;PSMA8
Hh Mutants Are Degraded By ERAD R-HSA-5362768	4/55	0.32868	0.77693	1.41281	1.572	PSMD12;PSMB5;PSMA1;PSMA8
Cdc20:Phospho-APC/C Mediated Degradation Of Cyclin A R-HSA-174184	5/72	0.329109	0.77693	1.34442	1.49415	PSMD12;PSMB5;PSMA1;CDK1;PSMA8
MyD88-independent TLR4 Cascade R-HSA-166166	7/107	0.333242	0.77693	1.26127	1.38599	MAPK10;NLRX1;PPP2R1B;NKIRAS1;NKIRAS2;IRF7;TLR4
Collagen Formation R-HSA-1474290	6/90	0.33684	0.77693	1.28687	1.40031	COL4A2;LOX;PCOLCE2;COL25A1;COL4A1;PLOD2
Ovarian Tumor Domain Proteases R-HSA-5689896	3/39	0.338091	0.77693	1.50087	1.62761	OTUB2;CDK1;RHOA
Signaling By FGFR3 R-HSA-5654741	3/39	0.338091	0.77693	1.50087	1.62761	SPRY2;PIK3R1;FGF1
Synthesis Of PA R-HSA-1483166	3/39	0.338091	0.77693	1.50087	1.62761	DDHD2;PLA2G5;DDHD1
APC/C:Cdh1 Mediated Degradation Of Cdc20 And APC/C:Cdh1 Targets In Late Mitosis/Early G1 R-HSA-174178	5/73	0.339647	0.77693	1.32458	1.43035	PSMD12;PSMB5;PSMA1;SKP2;PSMA8
APC:Cdc20 Mediated Degradation Of Cell Cycle Proteins Before Cycle Checkpoint Satisfied R-HSA-179419	5/73	0.339647	0.77693	1.32458	1.43035	PSMD12;PSMB5;PSMA1;CDK1;PSMA8
Stabilization Of P53 R-HSA-69541	4/56	0.340802	0.77693	1.38557	1.4915	PSMD12;PSMB5;PSMA1;PSMA8
Gene Expression (Transcription) R-HSA-74160	80/1449	0.342669	0.77693	1.05571	1.13065	PIWIL2;CITED1;THRA;ICE2;TACO1;H2AC19;ZC3H8;CCNC;CGB3;BRCA1;NR2E1;TTF1;LSM10;PPP2R1B;MYC;CHEK1;MAGOH;RSPO3;ZNF446;SKP2;YWHAG;TEAD3;ZNF682;RBFOX1;OPRM1;THOC5;MED7;WDR33;H2AJ;RAD51D;PSMA1;RRAGC;CCNE1;ZNF317;PRKCQ;ANG;ZNF596;NOTCH2;HDAC5;PSMD12;CBFB;ZNF195;NEDD4L;GLYAT;GATA1;NDRG1;NR2C1;GTF2E2;PSMA8;U2AF1L4;SOCS3;PSMB5;PDZD2;SUDS3;RFFL;ATRIP;ZNF267;POLR2L;WWOX;CDKN2B;CPSF7;ZNF460;TAF15;H2BC5;VDR;TAF1…
Dopamine Neurotransmitter Release Cycle R-HSA-212676	2/23	0.343371	0.77693	1.71501	1.83325	PPFIA1;SYN1
Long-term Potentiation R-HSA-9620244	2/23	0.343371	0.77693	1.71501	1.83325	DLG1;ACTN2
PI-3K cascade:FGFR2 R-HSA-5654695	2/23	0.343371	0.77693	1.71501	1.83325	PIK3R1;FGF1
RHOBTB1 GTPase Cycle R-HSA-9013422	2/23	0.343371	0.77693	1.71501	1.83325	CPSF7;CCT7
Signaling By NTRK2 (TRKB) R-HSA-9006115	2/23	0.343371	0.77693	1.71501	1.83325	NTRK2;PIK3R1
Canonical Retinoid Cycle In Rods (Twilight Vision) R-HSA-2453902	2/23	0.343371	0.77693	1.71501	1.83325	RBP4;RDH5
Activation Of NMDA Receptors And Postsynaptic Events R-HSA-442755	5/74	0.35021	0.77693	1.30532	1.36957	DLG1;GRIN3A;ACTN2;MAPT;PRKACB
Positive Epigenetic Regulation Of rRNA Expression R-HSA-5250913	5/74	0.35021	0.77693	1.30532	1.36957	H2AJ;H2BC5;H2AC19;TTF1;POLR2L
RNA Polymerase II Transcribes snRNA Genes R-HSA-6807505	5/74	0.35021	0.77693	1.30532	1.36957	ICE2;TAF13;ZC3H8;GTF2E2;POLR2L
Signaling By NOTCH1 R-HSA-1980143	5/74	0.35021	0.77693	1.30532	1.36957	HDAC5;TLE1;MYC;DTX1;CCNC
Binding Of TCF/LEF:CTNNB1 To Target Gene Promoters R-HSA-4411364	1/8	0.351291	0.77693	2.57197	2.69065	MYC
CREB3 Factors Activate Genes R-HSA-8874211	1/8	0.351291	0.77693	2.57197	2.69065	MBTPS1
Defects In Biotin (Btn) Metabolism R-HSA-3323169	1/8	0.351291	0.77693	2.57197	2.69065	PCCA
Fatty Acids Bound To GPR40 (FFAR1) Regulate Insulin Secretion R-HSA-434316	1/8	0.351291	0.77693	2.57197	2.69065	GNAQ
Formyl Peptide Receptors Bind Formyl Peptides And Many Other Ligands R-HSA-444473	1/8	0.351291	0.77693	2.57197	2.69065	ANXA1
Gain-of-function MRAS Complexes Activate RAF Signaling R-HSA-9726842	1/8	0.351291	0.77693	2.57197	2.69065	SHOC2
Histidine Catabolism R-HSA-70921	1/8	0.351291	0.77693	2.57197	2.69065	HNMT
Interleukin-18 Signaling R-HSA-9012546	1/8	0.351291	0.77693	2.57197	2.69065	IL18BP
Lectin Pathway Of Complement Activation R-HSA-166662	1/8	0.351291	0.77693	2.57197	2.69065	MASP1
Linoleic Acid (LA) Metabolism R-HSA-2046105	1/8	0.351291	0.77693	2.57197	2.69065	MUSK
Metabolism Of Ingested SeMet, Sec, MeSec Into H2Se R-HSA-2408508	1/8	0.351291	0.77693	2.57197	2.69065	HNMT
Miro GTPase Cycle R-HSA-9715370	1/8	0.351291	0.77693	2.57197	2.69065	MYO19
ROBO Receptors Bind AKAP5 R-HSA-9010642	1/8	0.351291	0.77693	2.57197	2.69065	PRKACB
RUNX2 Regulates Genes Involved In Cell Migration R-HSA-8941332	1/8	0.351291	0.77693	2.57197	2.69065	CBFB
RUNX3 Regulates WNT Signaling R-HSA-8951430	1/8	0.351291	0.77693	2.57197	2.69065	MYC
RUNX3 Regulates YAP1-mediated Transcription R-HSA-8951671	1/8	0.351291	0.77693	2.57197	2.69065	TEAD3
Relaxin Receptors R-HSA-444821	1/8	0.351291	0.77693	2.57197	2.69065	RLN3
Release Of Hh-Np From Secreting Cell R-HSA-5362798	1/8	0.351291	0.77693	2.57197	2.69065	GPC5
SMAC, XIAP-regulated Apoptotic Response R-HSA-111469	1/8	0.351291	0.77693	2.57197	2.69065	SEPTIN4
Sema4D Mediated Inhibition Of Cell Attachment And Migration R-HSA-416550	1/8	0.351291	0.77693	2.57197	2.69065	RHOA
Synthesis Of UDP-N-acetyl-glucosamine R-HSA-446210	1/8	0.351291	0.77693	2.57197	2.69065	GFPT1
Synthesis Of diphthamide-EEF2 R-HSA-5358493	1/8	0.351291	0.77693	2.57197	2.69065	DPH3
TRAIL Signaling R-HSA-75158	1/8	0.351291	0.77693	2.57197	2.69065	TNFRSF10B
Amine Ligand-Binding Receptors R-HSA-375280	3/40	0.352724	0.77693	1.46023	1.52166	CHRM2;HTR5A;DRD3
RET Signaling R-HSA-8853659	3/40	0.352724	0.77693	1.46023	1.52166	IRS2;PIK3R1;PRKACB
Signaling By FGFR4 R-HSA-5654743	3/40	0.352724	0.77693	1.46023	1.52166	SPRY2;PIK3R1;FGF1
NCAM Signaling For Neurite Out-Growth R-HSA-375165	4/57	0.352937	0.77693	1.35935	1.41572	COL4A2;COL4A1;PTPRA;CACNA1G
M Phase R-HSA-68886	22/380	0.353692	0.77693	1.10799	1.15157	RAB1A;PSMD12;H2BC5;NEK7;H2AC19;VRK2;ARPP19;MZT1;SKA2;PSMA8;SGO2;H2AJ;PSMB5;H3-4;PPP2R1B;PSMA1;HAUS8;AKAP9;CHMP2B;CDK1;YWHAG;MCPH1
APC/C:Cdc20 Mediated Degradation Of Mitotic Proteins R-HSA-176409	5/75	0.360788	0.77693	1.2866	1.31164	PSMD12;PSMB5;PSMA1;CDK1;PSMA8
Aggrephagy R-HSA-9646399	2/24	0.362782	0.77693	1.63697	1.65981	PRKN;PARK7
DARPP-32 Events R-HSA-180024	2/24	0.362782	0.77693	1.63697	1.65981	PPP2R1B;PRKACB
Downstream Signaling Of Activated FGFR3 R-HSA-5654708	2/24	0.362782	0.77693	1.63697	1.65981	PIK3R1;FGF1
G-protein Activation R-HSA-202040	2/24	0.362782	0.77693	1.63697	1.65981	GNAQ;OPRM1
Growth Hormone Receptor Signaling R-HSA-982772	2/24	0.362782	0.77693	1.63697	1.65981	SOCS3;IRS2
Impaired BRCA2 Binding To PALB2 R-HSA-9709603	2/24	0.362782	0.77693	1.63697	1.65981	RAD51D;BRCA1
MicroRNA (miRNA) Biogenesis R-HSA-203927	2/24	0.362782	0.77693	1.63697	1.65981	AGO3;POLR2L
Other Interleukin Signaling R-HSA-449836	2/24	0.362782	0.77693	1.63697	1.65981	PTPRZ1;JAK1
RHO GTPases Activate NADPH Oxidases R-HSA-5668599	2/24	0.362782	0.77693	1.63697	1.65981	PDZD2;PIK3C3
Extracellular Matrix Organization R-HSA-1474244	17/291	0.364626	0.77693	1.11829	1.12822	FGB;FBN3;FGA;PTPRS;MUSK;PCOLCE2;COL25A1;MMP1;FN1;PLOD2;MMP16;COL4A2;LOX;ITGAD;CAPN7;COL4A1;FMOD
Hh Mutants Abrogate Ligand Secretion R-HSA-5387390	4/58	0.365072	0.77693	1.33411	1.34433	PSMD12;PSMB5;PSMA1;PSMA8
Metabolism Of Polyamines R-HSA-351202	4/58	0.365072	0.77693	1.33411	1.34433	PSMD12;PSMB5;PSMA1;PSMA8
NIK To Noncanonical NF-kB Signaling R-HSA-5676590	4/58	0.365072	0.77693	1.33411	1.34433	PSMD12;PSMB5;PSMA1;PSMA8
Oxidative Stress Induced Senescence R-HSA-2559580	6/93	0.365268	0.77693	1.2423	1.25115	MAPK10;H2AJ;CDKN2B;H2BC5;AGO3;H2AC19
Binding And Uptake Of Ligands By Scavenger Receptors R-HSA-2173782	3/41	0.367317	0.77693	1.42173	1.4239	COL4A2;COL4A1;MASP1
Defective Homologous Recombination Repair (HRR) Due To BRCA2 Loss Of Function R-HSA-9701190	3/41	0.367317	0.77693	1.42173	1.4239	RAD51D;BRCA1;ATRIP
Ub-specific Processing Proteases R-HSA-5689880	12/201	0.369368	0.77693	1.14408	1.13946	TOMM70;PSMD12;PSMB5;PSMA1;H2BC5;TRRAP;MYC;H2AC19;SUDS3;SKP2;CDC25A;PSMA8
Activation Of APC/C And APC/C:Cdc20 Mediated Degradation Of Mitotic Proteins R-HSA-176814	5/76	0.371376	0.77693	1.26841	1.25641	PSMD12;PSMB5;PSMA1;CDK1;PSMA8
Downstream TCR Signaling R-HSA-202424	6/94	0.374775	0.77693	1.22812	1.20531	PSMD12;PSMB5;PSMA1;PRKCQ;PIK3R1;PSMA8
Arachidonic Acid Metabolism R-HSA-2142753	4/59	0.377197	0.77693	1.30978	1.27703	CBR1;GPX1;CYP4F3;PTGS1
B-WICH Complex Positively Regulates rRNA Expression R-HSA-5250924	4/59	0.377197	0.77693	1.30978	1.27703	H2AJ;H2BC5;H2AC19;POLR2L
RNA Polymerase I Promoter Escape R-HSA-73772	4/59	0.377197	0.77693	1.30978	1.27703	H2AJ;H2BC5;H2AC19;POLR2L
Signaling By Receptor Tyrosine Kinases R-HSA-9006934	28/496	0.378834	0.77693	1.07862	1.04697	GABRB2;PTPRS;FLT4;HPN;IRS2;PIK3R1;FGF1;FGFRL1;CDC42;PTPRZ1;PPP2R1B;MYC;CHEK1;PRKACB;POLR2L;ATP6V1F;WWOX;NTRK2;EGR3;VEGFB;BAIAP2;RHOA;VAV1;COL4A2;COL4A1;SPRY2;PIK3C3;CRK
Defective Pyroptosis R-HSA-9710421	3/42	0.381851	0.77693	1.3852	1.33357	H2AJ;H2BC5;H2AC19
PRC2 Methylates Histones And DNA R-HSA-212300	3/42	0.381851	0.77693	1.3852	1.33357	H2AJ;H2BC5;H2AC19
Signaling By FGFR2 In Disease R-HSA-5655253	3/42	0.381851	0.77693	1.3852	1.33357	PIK3R1;FGF1;POLR2L
Signaling By SCF-KIT R-HSA-1433557	3/42	0.381851	0.77693	1.3852	1.33357	CHEK1;PIK3R1;VAV1
Signaling By Insulin Receptor R-HSA-74752	5/77	0.381963	0.77693	1.25073	1.20374	IRS2;PIK3C3;PIK3R1;FGF1;ATP6V1F
Defective HDR Thru Homologous Recombination (HRR) Due To BRCA1 Loss-Of-Function R-HSA-9701192	2/25	0.381971	0.77693	1.56571	1.50686	RAD51D;BRCA1
Inactivation Of CSF3 (G-CSF) Signaling R-HSA-9705462	2/25	0.381971	0.77693	1.56571	1.50686	SOCS3;JAK1
Regulation Of IFNA/IFNB Signaling R-HSA-912694	2/25	0.381971	0.77693	1.56571	1.50686	SOCS3;JAK1
TRAF6 Mediated NF-kB Activation R-HSA-933542	2/25	0.381971	0.77693	1.56571	1.50686	NKIRAS1;NKIRAS2
Termination Of O-glycan Biosynthesis R-HSA-977068	2/25	0.381971	0.77693	1.56571	1.50686	MUC2;ST3GAL3
Drug ADME R-HSA-9748784	6/95	0.384289	0.77693	1.21426	1.16127	UGT1A1;ABCC5;GLYAT;ACSM2B;VAV1;SULT2A1
Transcriptional Regulation By RUNX3 R-HSA-8878159	6/95	0.384289	0.77693	1.21426	1.16127	PSMD12;PSMB5;PSMA1;CBFB;MYC;TEAD3
UCH Proteinases R-HSA-5689603	6/95	0.384289	0.77693	1.21426	1.16127	PSMD12;PSMB5;PSMA1;H2AC19;FOXK2;PSMA8
Reproduction R-HSA-1474165	7/113	0.385266	0.77693	1.1895	1.13457	H2AJ;H3-4;H2BC5;MSH5;CDK2;H2AC19;BRCA1
Activated NTRK2 Signals Thru FRS2 And FRS3 R-HSA-9028731	1/9	0.385459	0.77693	2.25036	2.14531	NTRK2
Activation Of Ca-permeable Kainate Receptor R-HSA-451308	1/9	0.385459	0.77693	2.25036	2.14531	DLG1
BH3-only Proteins Associate With And Inactivate Anti-Apoptotic BCL-2 Members R-HSA-111453	1/9	0.385459	0.77693	2.25036	2.14531	BCL2L1
Beta-oxidation Of pristanoyl-CoA R-HSA-389887	1/9	0.385459	0.77693	2.25036	2.14531	CRAT
CHL1 Interactions R-HSA-447041	1/9	0.385459	0.77693	2.25036	2.14531	CNTN6
Chylomicron Assembly R-HSA-8963888	1/9	0.385459	0.77693	2.25036	2.14531	SAR1B
Chylomicron Remodeling R-HSA-8963901	1/9	0.385459	0.77693	2.25036	2.14531	LPL
Displacement Of DNA Glycosylase By APEX1 R-HSA-110357	1/9	0.385459	0.77693	2.25036	2.14531	MUTYH
E2F-enabled Inhibition Of Pre-Replication Complex Formation R-HSA-113507	1/9	0.385459	0.77693	2.25036	2.14531	CDK1
Formation Of Annular Gap Junctions R-HSA-196025	1/9	0.385459	0.77693	2.25036	2.14531	GJA1
GP1b-IX-V Activation Signaling R-HSA-430116	1/9	0.385459	0.77693	2.25036	2.14531	PIK3R1
Interleukin-9 Signaling R-HSA-8985947	1/9	0.385459	0.77693	2.25036	2.14531	JAK1
MAPK1 (ERK2) Activation R-HSA-112411	1/9	0.385459	0.77693	2.25036	2.14531	JAK1
MET Receptor Recycling R-HSA-8875656	1/9	0.385459	0.77693	2.25036	2.14531	CRK
Maturation Of Protein 3A R-HSA-9683673	1/9	0.385459	0.77693	2.25036	2.14531	ST3GAL3
PI5P Regulates TP53 Acetylation R-HSA-6811555	1/9	0.385459	0.77693	2.25036	2.14531	PDZD2
Processing And Activation Of SUMO R-HSA-3215018	1/9	0.385459	0.77693	2.25036	2.14531	SENP2
Prostanoid Ligand Receptors R-HSA-391908	1/9	0.385459	0.77693	2.25036	2.14531	PTGER3
RHO GTPases Activate Rhotekin And Rhophilins R-HSA-5666185	1/9	0.385459	0.77693	2.25036	2.14531	RHOA
Small Interfering RNA (siRNA) Biogenesis R-HSA-426486	1/9	0.385459	0.77693	2.25036	2.14531	AGO3
Synthesis Of 5-Eicosatetraenoic Acids R-HSA-2142688	1/9	0.385459	0.77693	2.25036	2.14531	GPX1
TRAF6 Mediated IRF7 Activation In TLR7/8 Or 9 Signaling R-HSA-975110	1/9	0.385459	0.77693	2.25036	2.14531	IRF7
TRIF-mediated Programmed Cell Death R-HSA-2562578	1/9	0.385459	0.77693	2.25036	2.14531	TLR4
Transport Of Gamma-Carboxylated Protein Precursors From Endoplasmic Reticulum To Golgi Apparatus R-HSA-159763	1/9	0.385459	0.77693	2.25036	2.14531	TTF2
Transport Of Nucleotide Sugars R-HSA-727802	1/9	0.385459	0.77693	2.25036	2.14531	SLC35A3
SARS-CoV Infections R-HSA-9679506	21/369	0.388284	0.77693	1.08755	1.02884	TOMM70;SAR1B;SIGMAR1;COMT;VAV1;GJA1;MAP1LC3B;ZDHHC9;FNTA;CHMP2B;GPC3;IRF7;GPC5;PIK3C3;MASP1;SUDS3;GPC6;ISCU;YWHAG;ST3GAL3;JAK1
FCGR3A-mediated Phagocytosis R-HSA-9664422	4/60	0.389298	0.77693	1.28633	1.21353	CDC42;BAIAP2;CRK;VAV1
Transcriptional Regulation By MECP2 R-HSA-8986944	4/60	0.389298	0.77693	1.28633	1.21353	RBFOX1;AGO3;OPRM1;PTPN4
rRNA Modification In Nucleus And Cytosol R-HSA-6790901	4/60	0.389298	0.77693	1.28633	1.21353	RRP7A;DDX49;WDR3;SNU13
FCERI Mediated NF-kB Activation R-HSA-2871837	5/78	0.392543	0.77693	1.23353	1.15349	PSMD12;PSMB5;PSMA1;PRKCQ;PSMA8
Nuclear Events Mediated By NFE2L2 R-HSA-9759194	5/78	0.392543	0.77693	1.23353	1.15349	PSMD12;PSMB5;PSMA1;MYC;GCLM
RNA Polymerase I Promoter Clearance R-HSA-73854	5/78	0.392543	0.77693	1.23353	1.15349	H2AJ;H2BC5;H2AC19;TTF1;POLR2L
Signaling By NTRKs R-HSA-166520	8/132	0.393511	0.77693	1.16209	1.08382	NTRK2;EGR3;PTPRS;PPP2R1B;IRS2;PIK3R1;CRK;RHOA
Interleukin-1 Signaling R-HSA-9020702	7/114	0.393979	0.77693	1.17832	1.09756	PSMD12;NLRX1;PSMB5;PSMA1;NKIRAS1;NKIRAS2;PSMA8
Signaling By NTRK1 (TRKA) R-HSA-187037	7/114	0.393979	0.77693	1.17832	1.09756	NTRK2;EGR3;PPP2R1B;IRS2;PIK3R1;CRK;RHOA
Generic Transcription Pathway R-HSA-212436	65/1190	0.396045	0.77693	1.04222	0.965334	CITED1;THRA;TACO1;H2AC19;CCNC;CGB3;BRCA1;NR2E1;PPP2R1B;MYC;CHEK1;RSPO3;ZNF446;SKP2;YWHAG;TEAD3;ZNF682;RBFOX1;OPRM1;MED7;H2AJ;RAD51D;PSMA1;RRAGC;CCNE1;ZNF317;PRKCQ;ZNF596;NOTCH2;HDAC5;PSMD12;CBFB;ZNF195;NEDD4L;GLYAT;GATA1;NDRG1;NR2C1;PSMA8;SOCS3;PSMB5;PDZD2;RFFL;ATRIP;ZNF267;POLR2L;WWOX;CDKN2B;ZNF460;TAF15;H2BC5;VDR;TAF13;GADD45A;TNFRSF10B;HIPK1;POU4F1;AGO3;BCL6;CDK2;CDK1;ZNF777;ZNF655;PTPN4;RNF141
DAP12 Interactions R-HSA-2172127	3/43	0.396309	0.77693	1.3505	1.24997	SPNS1;PIK3R1;TREM1
RND2 GTPase Cycle R-HSA-9696270	3/43	0.396309	0.77693	1.3505	1.24997	UBXN11;PIK3R1;FAM83B
Downstream Signaling Of Activated FGFR4 R-HSA-5654716	2/26	0.400907	0.77693	1.5004	1.3714	PIK3R1;FGF1
Interleukin-20 Family Signaling R-HSA-8854691	2/26	0.400907	0.77693	1.5004	1.3714	SOCS3;JAK1
Pyroptosis R-HSA-5620971	2/26	0.400907	0.77693	1.5004	1.3714	CASP4;CHMP2B
Sulfur Amino Acid Metabolism R-HSA-1614635	2/26	0.400907	0.77693	1.5004	1.3714	MPST;MTRR
WNT Ligand Biogenesis And Trafficking R-HSA-3238698	2/26	0.400907	0.77693	1.5004	1.3714	WNT11;WLS
Dectin-1 Mediated Noncanonical NF-kB Signaling R-HSA-5607761	4/61	0.401367	0.77693	1.26369	1.1536	PSMD12;PSMB5;PSMA1;PSMA8
Post NMDA Receptor Activation Events R-HSA-438064	4/61	0.401367	0.77693	1.26369	1.1536	DLG1;ACTN2;MAPT;PRKACB
Selective Autophagy R-HSA-9663891	4/61	0.401367	0.77693	1.26369	1.1536	TOMM70;PRKN;MAP1LC3B;PARK7
Amyloid Fiber Formation R-HSA-977225	5/79	0.403108	0.77693	1.2168	1.10552	PRKN;FGA;NAT8;H2BC5;H2AC19
RNA Polymerase I Transcription R-HSA-73864	5/79	0.403108	0.77693	1.2168	1.10552	H2AJ;H2BC5;H2AC19;TTF1;POLR2L
Potential Therapeutics For SARS R-HSA-9679191	6/97	0.403311	0.77693	1.18744	1.07826	FNTA;SIGMAR1;SUDS3;COMT;VAV1;JAK1
Signaling By GPCR R-HSA-372790	38/689	0.406922	0.77693	1.05219	0.946055	GPR27;CHRM2;ITSN1;PTGER3;MLNR;TAS2R46;GNAI3;PIK3R1;TTF2;CRHR1;ABHD12;CDC42;PROKR2;P2RY6;GRM5;RGS3;WNT11;PPP2R1B;P2RY2;GNA12;PRKACB;DRD3;PDE8A;ANXA1;XCR1;ARHGEF15;PLEKHG5;OPRM1;HTR5A;RHOA;VAV1;GNAQ;GNRH2;RLN3;PRKCQ;AGXT;PDE7A;SOS2
Aspirin ADME R-HSA-9749641	3/44	0.410675	0.77693	1.31749	1.17251	UGT1A1;GLYAT;ACSM2B
Collagen Chain Trimerization R-HSA-8948216	3/44	0.410675	0.77693	1.31749	1.17251	COL4A2;COL25A1;COL4A1
Interleukin-12 Signaling R-HSA-9020591	3/44	0.410675	0.77693	1.31749	1.17251	CDC42;ANXA2;JAK1
Interleukin-2 Family Signaling R-HSA-451927	3/44	0.410675	0.77693	1.31749	1.17251	PIK3R1;SOS2;JAK1
TP53 Regulates Transcription Of Cell Death Genes R-HSA-5633008	3/44	0.410675	0.77693	1.31749	1.17251	BCL6;TNFRSF10B;NDRG1
TCR Signaling R-HSA-202403	7/116	0.411401	0.77693	1.15658	1.02726	PSMD12;PSMB5;PSMA1;SPNS1;PRKCQ;PIK3R1;PSMA8
Asymmetric Localization Of PCP Proteins R-HSA-4608870	4/62	0.413391	0.77693	1.24184	1.09699	PSMD12;PSMB5;PSMA1;PSMA8
Regulation Of Actin Dynamics For Phagocytic Cup Formation R-HSA-2029482	4/62	0.413391	0.77693	1.24184	1.09699	CDC42;BAIAP2;CRK;VAV1
TP53 Regulates Transcription Of DNA Repair Genes R-HSA-6796648	4/62	0.413391	0.77693	1.24184	1.09699	RAD51D;CHEK1;BRCA1;POLR2L
Cell Cycle, Mitotic R-HSA-69278	29/523	0.413623	0.77693	1.05788	0.933902	RAB1A;PSMD12;H2AC19;ARPP19;SKA2;PSMA8;PSMB5;HAUS8;PPP2R1B;MYC;SKP2;YWHAG;CDKN2B;H2BC5;NEK7;DYRK1A;VRK2;MZT1;CDC25A;SGO2;H2AJ;H3-4;PSMA1;CCNE1;CDK2;AKAP9;CHMP2B;CDK1;MCPH1
RNA Polymerase II Pre-transcription Events R-HSA-674695	5/80	0.413652	0.77693	1.20051	1.05973	TAF15;TAF13;EAF1;GTF2E2;POLR2L
Recruitment Of NuMA To Mitotic Centrosomes R-HSA-380320	5/80	0.413652	0.77693	1.20051	1.05973	HAUS8;AKAP9;CDK1;YWHAG;MZT1
Phospholipid Metabolism R-HSA-1483257	12/208	0.414651	0.77693	1.10281	0.970819	PCYT1B;PHOSPHO1;LPGAT1;SLC44A4;CPNE6;DDHD2;PLAAT3;PIK3C3;PIK3R1;PLA2G5;DDHD1;CRLS1
Acetylcholine Regulates Insulin Secretion R-HSA-399997	1/10	0.417829	0.77693	2.00021	1.74555	GNAQ
Activation Of AMPK Downstream Of NMDARs R-HSA-9619483	1/10	0.417829	0.77693	2.00021	1.74555	MAPT
Activation Of AP-1 Family Of Transcription Factors R-HSA-450341	1/10	0.417829	0.77693	2.00021	1.74555	MAPK10
Caspase Activation Via Dependence Receptors In Absence Of Ligand R-HSA-418889	1/10	0.417829	0.77693	2.00021	1.74555	APPL1
Competing Endogenous RNAs (ceRNAs) Regulate PTEN Translation R-HSA-8948700	1/10	0.417829	0.77693	2.00021	1.74555	AGO3
Condensation Of Prometaphase Chromosomes R-HSA-2514853	1/10	0.417829	0.77693	2.00021	1.74555	CDK1
Crosslinking Of Collagen Fibrils R-HSA-2243919	1/10	0.417829	0.77693	2.00021	1.74555	LOX
FGFR2b Ligand Binding And Activation R-HSA-190377	1/10	0.417829	0.77693	2.00021	1.74555	FGF1
Folding Of Actin By CCT/TriC R-HSA-390450	1/10	0.417829	0.77693	2.00021	1.74555	CCT7
Gamma-carboxylation Of Protein Precursors R-HSA-159740	1/10	0.417829	0.77693	2.00021	1.74555	TTF2
Gap Junction Degradation R-HSA-190873	1/10	0.417829	0.77693	2.00021	1.74555	GJA1
Interleukin-21 Signaling R-HSA-9020958	1/10	0.417829	0.77693	2.00021	1.74555	JAK1
Negative Regulation Of Activity Of TFAP2 (AP-2) Family Transcription Factors R-HSA-8866904	1/10	0.417829	0.77693	2.00021	1.74555	WWOX
Neurotoxicity Of Clostridium Toxins R-HSA-168799	1/10	0.417829	0.77693	2.00021	1.74555	SV2B
PI3K Events In ERBB4 Signaling R-HSA-1250342	1/10	0.417829	0.77693	2.00021	1.74555	PIK3R1
RUNX1 And FOXP3 Control Development Of Regulatory T Lymphocytes (Tregs) R-HSA-8877330	1/10	0.417829	0.77693	2.00021	1.74555	CBFB
RUNX3 Regulates p14-ARF R-HSA-8951936	1/10	0.417829	0.77693	2.00021	1.74555	CBFB
Receptor Mediated Mitophagy R-HSA-8934903	1/10	0.417829	0.77693	2.00021	1.74555	MAP1LC3B
Removal Of Aminoterminal Propeptides From Gamma-Carboxylated Proteins R-HSA-159782	1/10	0.417829	0.77693	2.00021	1.74555	TTF2
SLBP Independent Processing Of Histone Pre-mRNAs R-HSA-111367	1/10	0.417829	0.77693	2.00021	1.74555	LSM10
STAT5 Activation Downstream Of FLT3 ITD Mutants R-HSA-9702518	1/10	0.417829	0.77693	2.00021	1.74555	BCL2L1
Signal Attenuation R-HSA-74749	1/10	0.417829	0.77693	2.00021	1.74555	IRS2
Signaling By FGFR4 In Disease R-HSA-5655291	1/10	0.417829	0.77693	2.00021	1.74555	PIK3R1
Zinc Influx Into Cells By SLC39 Gene Family R-HSA-442380	1/10	0.417829	0.77693	2.00021	1.74555	SLC39A10
Acyl Chain Remodelling Of PC R-HSA-1482788	2/27	0.419565	0.77693	1.4403	1.25096	PLAAT3;PLA2G5
CREB1 Phosphorylation Thru NMDA Receptor-Mediated Activation Of RAS Signaling R-HSA-442742	2/27	0.419565	0.77693	1.4403	1.25096	DLG1;ACTN2
Effects Of PIP2 Hydrolysis R-HSA-114508	2/27	0.419565	0.77693	1.4403	1.25096	ABHD12;PRKCQ
FLT3 Signaling In Disease R-HSA-9682385	2/27	0.419565	0.77693	1.4403	1.25096	PIK3R1;BCL2L1
Interleukin Receptor SHC Signaling R-HSA-912526	2/27	0.419565	0.77693	1.4403	1.25096	PIK3R1;JAK1
SARS-CoV-2 Infection R-HSA-9694516	16/283	0.421239	0.778938	1.07946	0.933254	TOMM70;SAR1B;GJA1;MAP1LC3B;ZDHHC9;CHMP2B;GPC3;IRF7;GPC5;PIK3C3;MASP1;GPC6;ISCU;YWHAG;ST3GAL3;JAK1
Centrosome Maturation R-HSA-380287	5/81	0.424166	0.780028	1.18465	1.01599	HAUS8;AKAP9;CDK1;YWHAG;MZT1
Senescence-Associated Secretory Phenotype (SASP) R-HSA-2559582	5/81	0.424166	0.780028	1.18465	1.01599	H2AJ;CDKN2B;H2BC5;CDK2;H2AC19
Signaling By NOTCH4 R-HSA-9013694	5/81	0.424166	0.780028	1.18465	1.01599	NOTCH2;PSMD12;PSMB5;PSMA1;FLT4
Regulation Of Complement Cascade R-HSA-977606	3/45	0.424932	0.780028	1.28605	1.10064	CFH;TTF2;CLU
TAK1-dependent IKK And NF-kappa-B Activation R-HSA-445989	3/45	0.424932	0.780028	1.28605	1.10064	NLRX1;NKIRAS1;NKIRAS2
Synthesis Of Substrates In N-glycan Biosythesis R-HSA-446219	4/63	0.425363	0.780028	1.22073	1.04349	DPM1;NEU3;GFPT1;ST3GAL3
SLC-mediated Transmembrane Transport R-HSA-425407	14/247	0.427406	0.78269	1.08224	0.919927	SLC12A4;SLC44A4;SLC26A1;SLC35A3;SLC20A2;SLC2A12;SLC5A11;SLC39A10;SLC5A12;SLC5A10;SLC6A20;SLC7A2;SLC26A7;SLC38A5
Signaling By TGFB Family Members R-HSA-9006936	7/119	0.437464	0.786534	1.12542	0.930452	CDKN2B;ACVR1C;MYC;NEDD4L;CCNC;INHBA;RHOA
Synthesis Of DNA R-HSA-69239	7/119	0.437464	0.786534	1.12542	0.930452	PSMD12;PSMB5;PSMA1;CCNE1;CDK2;SKP2;PSMA8
Transcriptional Regulation By RUNX2 R-HSA-8878166	7/119	0.437464	0.786534	1.12542	0.930452	PSMD12;PSMB5;CBFB;PSMA1;CDK1;SKP2;PSMA8
DAP12 Signaling R-HSA-2424491	2/28	0.437921	0.786534	1.38483	1.14348	SPNS1;PIK3R1
Downstream Signal Transduction R-HSA-186763	2/28	0.437921	0.786534	1.38483	1.14348	PIK3R1;CRK
Metabolism Of Porphyrins R-HSA-189445	2/28	0.437921	0.786534	1.38483	1.14348	FABP1;UGT1A1
Notch-HLH Transcription Pathway R-HSA-350054	2/28	0.437921	0.786534	1.38483	1.14348	NOTCH2;HDAC5
XBP1(S) Activates Chaperone Genes R-HSA-381038	3/46	0.439068	0.786534	1.25608	1.03388	DNAJC3;WFS1;GFPT1
TRAF6 Mediated Induction Of NFkB And MAP Kinases Upon TLR7/8 Or 9 Activation R-HSA-975138	6/101	0.441186	0.786534	1.1372	0.93056	MAPK10;NLRX1;PPP2R1B;NKIRAS1;NKIRAS2;TLR4
PIP3 Activates AKT Signaling R-HSA-1257604	15/268	0.441575	0.786534	1.06776	0.872799	HDAC5;PSMD12;IRS2;PIK3R1;NR2E1;FGF1;VAV1;PSMA8;PREX2;IL1RL1;PSMB5;PPP2R1B;RRAGC;AGO3;PSMA1
ATF6 (ATF6-alpha) Activates Chaperones R-HSA-381033	1/11	0.448495	0.786534	1.8001	1.44342	MBTPS1
Beta-oxidation Of Very Long Chain Fatty Acids R-HSA-390247	1/11	0.448495	0.786534	1.8001	1.44342	ACOX1
Biotin Transport And Metabolism R-HSA-196780	1/11	0.448495	0.786534	1.8001	1.44342	PCCA
CASP8 Activity Is Inhibited R-HSA-5218900	1/11	0.448495	0.786534	1.8001	1.44342	TNFRSF10B
Dimerization Of Procaspase-8 R-HSA-69416	1/11	0.448495	0.786534	1.8001	1.44342	TNFRSF10B
Endosomal/Vacuolar Pathway R-HSA-1236977	1/11	0.448495	0.786534	1.8001	1.44342	LNPEP
Erythrocytes Take Up Carbon Dioxide And Release Oxygen R-HSA-1237044	1/11	0.448495	0.786534	1.8001	1.44342	CYB5R1
Gamma-carboxylation, Transport, And Amino-Terminal Cleavage Of Proteins R-HSA-159854	1/11	0.448495	0.786534	1.8001	1.44342	TTF2
MET Activates RAP1 And RAC1 R-HSA-8875555	1/11	0.448495	0.786534	1.8001	1.44342	CRK
Pexophagy R-HSA-9664873	1/11	0.448495	0.786534	1.8001	1.44342	MAP1LC3B
Phenylalanine And Tyrosine Metabolism R-HSA-8963691	1/11	0.448495	0.786534	1.8001	1.44342	KYAT1
RHO GTPases Activate IQGAPs R-HSA-5626467	1/11	0.448495	0.786534	1.8001	1.44342	CDC42
Regulation Of PTEN mRNA Translation R-HSA-8943723	1/11	0.448495	0.786534	1.8001	1.44342	AGO3
Regulation Of Signaling By NODAL R-HSA-1433617	1/11	0.448495	0.786534	1.8001	1.44342	ACVR1C
SARS-CoV-2 Modulates Autophagy R-HSA-9754560	1/11	0.448495	0.786534	1.8001	1.44342	MAP1LC3B
SLBP Dependent Processing Of Replication-Dependent Histone Pre-mRNAs R-HSA-77588	1/11	0.448495	0.786534	1.8001	1.44342	LSM10
Serotonin Receptors R-HSA-390666	1/11	0.448495	0.786534	1.8001	1.44342	HTR5A
Signaling By PDGFRA Extracellular Domain Mutants R-HSA-9673770	1/11	0.448495	0.786534	1.8001	1.44342	PIK3R1
Signaling By Activated Point Mutants Of FGFR1 R-HSA-1839122	1/11	0.448495	0.786534	1.8001	1.44342	FGF1
Synthesis Of PIPs At Late Endosome Membrane R-HSA-1660517	1/11	0.448495	0.786534	1.8001	1.44342	PIK3C3
Uptake And Function Of Anthrax Toxins R-HSA-5210891	1/11	0.448495	0.786534	1.8001	1.44342	ANTXR2
Disorders Of Transmembrane Transporters R-HSA-5619115	10/176	0.448699	0.786534	1.08474	0.869316	PSMD12;PSMB5;SLC35A3;PSMA1;SLC20A2;ABCC9;ERLIN2;SLC6A20;MAP4K5;PSMA8
FOXO-mediated Transcription R-HSA-9614085	4/65	0.449109	0.786534	1.18058	0.945042	BCL6;GADD45A;GLYAT;YWHAG
Transcriptional Regulation Of White Adipocyte Differentiation R-HSA-381340	5/84	0.455469	0.789131	1.13948	0.89612	LEP;LPL;CCNC;MED7;MED13L
Acyl Chain Remodelling Of PE R-HSA-1482839	2/29	0.455956	0.789131	1.33347	1.04726	PLAAT3;PLA2G5
Adherens Junctions Interactions R-HSA-418990	2/29	0.455956	0.789131	1.33347	1.04726	ANG;NECTIN1
Budding And Maturation Of HIV Virion R-HSA-162588	2/29	0.455956	0.789131	1.33347	1.04726	CHMP2B;NEDD4L
Downstream Signaling Of Activated FGFR2 R-HSA-5654696	2/29	0.455956	0.789131	1.33347	1.04726	PIK3R1;FGF1
FCERI Mediated Ca+2 Mobilization R-HSA-2871809	2/29	0.455956	0.789131	1.33347	1.04726	SPNS1;VAV1
Negative Regulation Of FGFR3 Signaling R-HSA-5654732	2/29	0.455956	0.789131	1.33347	1.04726	SPRY2;FGF1
Surfactant Metabolism R-HSA-5683826	2/29	0.455956	0.789131	1.33347	1.04726	P2RY2;TTF1
Uptake And Actions Of Bacterial Toxins R-HSA-5339562	2/29	0.455956	0.789131	1.33347	1.04726	SV2B;ANTXR2
Toll Like Receptor 3 (TLR3) Cascade R-HSA-168164	6/103	0.459959	0.791331	1.11364	0.864872	MAPK10;NLRX1;PPP2R1B;NKIRAS1;NKIRAS2;IRF7
Activation Of NF-kappaB In B Cells R-HSA-1169091	4/66	0.460865	0.791331	1.16147	0.899736	PSMD12;PSMB5;PSMA1;PSMA8
COPII-mediated Vesicle Transport R-HSA-204005	4/66	0.460865	0.791331	1.16147	0.899736	PPP6C;RAB1A;SAR1B;TMED2
Metabolism Of Water-Soluble Vitamins And Cofactors R-HSA-196849	7/122	0.463347	0.791331	1.09588	0.843042	CYB5A;MTRR;MTHFD1;PCCA;SHMT1;SLC19A3;MOCS1
IRE1alpha Activates Chaperones R-HSA-381070	3/48	0.466922	0.791331	1.20013	0.914008	DNAJC3;WFS1;GFPT1
DNA Repair R-HSA-73894	17/310	0.46696	0.791331	1.0447	0.795554	RTEL1;DCLRE1C;H2BC5;EYA2;EYA3;H2AC19;BRCA1;NEIL3;H2AJ;RAD51D;H3-4;PPP4R2;CHEK1;CDK2;ATRIP;MUTYH;POLR2L
APC/C:Cdc20 Mediated Degradation Of Securin R-HSA-174154	4/67	0.472534	0.791331	1.14298	0.85683	PSMD12;PSMB5;PSMA1;PSMA8
Downstream Signaling Of Activated FGFR1 R-HSA-5654687	2/30	0.473651	0.791331	1.28578	0.960846	PIK3R1;FGF1
MAPK Targets/ Nuclear Events Mediated By MAP Kinases R-HSA-450282	2/30	0.473651	0.791331	1.28578	0.960846	MAPK10;PPP2R1B
RNA Polymerase I Transcription Termination R-HSA-73863	2/30	0.473651	0.791331	1.28578	0.960846	TTF1;POLR2L
Signaling By CSF3 (G-CSF) R-HSA-9674555	2/30	0.473651	0.791331	1.28578	0.960846	SOCS3;JAK1
Synthesis Of Active Ubiquitin: Roles Of E1 And E2 Enzymes R-HSA-8866652	2/30	0.473651	0.791331	1.28578	0.960846	UBE2H;UBA1
Beta-catenin Independent WNT Signaling R-HSA-3858494	8/142	0.473994	0.791331	1.0748	0.802402	PSMD12;PSMB5;WNT11;AGO3;PSMA1;MYC;RHOA;PSMA8
S Phase R-HSA-69242	9/161	0.475689	0.791331	1.06596	0.791998	PSMD12;PSMB5;PSMA1;CCNE1;MYC;CDK2;SKP2;CDC25A;PSMA8
Signaling By FGFR R-HSA-190236	5/86	0.476075	0.791331	1.11123	0.824731	SPRY2;PIK3R1;FGF1;FGFRL1;POLR2L
ALK Mutants Bind TKIs R-HSA-9700645	1/12	0.477548	0.791331	1.63636	1.20942	FN1
Activation Of RAC1 R-HSA-428540	1/12	0.477548	0.791331	1.63636	1.20942	SOS2
CREB1 Phosphorylation Thru Activation Of Adenylate Cyclase R-HSA-442720	1/12	0.477548	0.791331	1.63636	1.20942	PRKACB
Caspase-mediated Cleavage Of Cytoskeletal Proteins R-HSA-264870	1/12	0.477548	0.791331	1.63636	1.20942	MAPT
Eicosanoids R-HSA-211979	1/12	0.477548	0.791331	1.63636	1.20942	CYP4F3
FGFR1c Ligand Binding And Activation R-HSA-190373	1/12	0.477548	0.791331	1.63636	1.20942	FGF1
FGFR3 Mutant Receptor Activation R-HSA-2033514	1/12	0.477548	0.791331	1.63636	1.20942	FGF1
Glutathione Synthesis And Recycling R-HSA-174403	1/12	0.477548	0.791331	1.63636	1.20942	GCLM
Hormone Ligand-Binding Receptors R-HSA-375281	1/12	0.477548	0.791331	1.63636	1.20942	GNRH2
Interleukin-2 Signaling R-HSA-9020558	1/12	0.477548	0.791331	1.63636	1.20942	JAK1
Josephin Domain DUBs R-HSA-5689877	1/12	0.477548	0.791331	1.63636	1.20942	PRKN
Miscellaneous Substrates R-HSA-211958	1/12	0.477548	0.791331	1.63636	1.20942	CYP4F3
NOTCH2 Intracellular Domain Regulates Transcription R-HSA-2197563	1/12	0.477548	0.791331	1.63636	1.20942	NOTCH2
Passive Transport By Aquaporins R-HSA-432047	1/12	0.477548	0.791331	1.63636	1.20942	AQP7
Presynaptic Depolarization And Calcium Channel Opening R-HSA-112308	1/12	0.477548	0.791331	1.63636	1.20942	CACNG4
Regulation Of Localization Of FOXO Transcription Factors R-HSA-9614399	1/12	0.477548	0.791331	1.63636	1.20942	YWHAG
TICAM1-dependent Activation Of IRF3/IRF7 R-HSA-9013973	1/12	0.477548	0.791331	1.63636	1.20942	IRF7
TP53 Regulates Transcription Of Death Receptors And Ligands R-HSA-6803211	1/12	0.477548	0.791331	1.63636	1.20942	TNFRSF10B
Vitamin D (Calciferol) Metabolism R-HSA-196791	1/12	0.477548	0.791331	1.63636	1.20942	VDR
Signaling By EGFR R-HSA-177929	3/49	0.480617	0.794428	1.17398	0.860153	CDC42;SPRY2;PIK3R1
mRNA Splicing - Minor Pathway R-HSA-72165	3/49	0.480617	0.794428	1.17398	0.860153	DDX42;SNRNP35;POLR2L
Costimulation By CD28 Family R-HSA-388841	4/68	0.484106	0.799198	1.12506	0.816176	CDC42;PPP2R1B;PIK3R1;VAV1
Fcgamma Receptor (FCGR) Dependent Phagocytosis R-HSA-2029480	5/87	0.486282	0.801791	1.09762	0.791346	CDC42;PIK3R1;BAIAP2;CRK;VAV1
PI5P, PP2A And IER3 Regulate PI3K/AKT Signaling R-HSA-6811558	6/106	0.487806	0.803302	1.08006	0.775306	IL1RL1;PPP2R1B;IRS2;PIK3R1;FGF1;VAV1
Antigen Activates B Cell Receptor Leading To Second Messenger Generation R-HSA-983695	2/31	0.490993	0.803527	1.24138	0.883025	PIK3R1;VAV1
EGFR Downregulation R-HSA-182971	2/31	0.490993	0.803527	1.24138	0.883025	CDC42;SPRY2
Late Endosomal Microautophagy R-HSA-9615710	2/31	0.490993	0.803527	1.24138	0.883025	CHMP2B;PARK7
Negative Regulation Of FGFR4 Signaling R-HSA-5654733	2/31	0.490993	0.803527	1.24138	0.883025	SPRY2;FGF1
Loss Of Nlp From Mitotic Centrosomes R-HSA-380259	4/69	0.495575	0.803527	1.10769	0.777639	HAUS8;AKAP9;CDK1;YWHAG
Transcription Of HIV Genome R-HSA-167172	4/69	0.495575	0.803527	1.10769	0.777639	TAF15;TAF13;GTF2E2;POLR2L
Opioid Signaling R-HSA-111885	5/88	0.496418	0.803527	1.08434	0.759401	PPP2R1B;GNAQ;GNAI3;OPRM1;PRKACB
Protein-protein Interactions At Synapses R-HSA-6794362	5/88	0.496418	0.803527	1.08434	0.759401	EPB41L5;GRM5;DLG1;PTPRS;PPFIA1
Signaling By Nuclear Receptors R-HSA-9006931	14/260	0.504731	0.803527	1.02434	0.700368	KANK1;CITED1;H2BC5;CBFB;H2AC19;GNAI3;PIK3R1;H2AJ;AGO3;MYC;ALDH1A1;RDH5;ZNF217;POLR2L
Adenylate Cyclase Inhibitory Pathway R-HSA-170670	1/13	0.505072	0.803527	1.49992	1.02453	GNAI3
Defects In Cobalamin (B12) Metabolism R-HSA-3296469	1/13	0.505072	0.803527	1.49992	1.02453	MTRR
Degradation Of Cysteine And Homocysteine R-HSA-1614558	1/13	0.505072	0.803527	1.49992	1.02453	MPST
Dissolution Of Fibrin Clot R-HSA-75205	1/13	0.505072	0.803527	1.49992	1.02453	ANXA2
ERKs Are Inactivated R-HSA-202670	1/13	0.505072	0.803527	1.49992	1.02453	PPP2R1B
FGFR2c Ligand Binding And Activation R-HSA-190375	1/13	0.505072	0.803527	1.49992	1.02453	FGF1
FGFR3 Ligand Binding And Activation R-HSA-190239	1/13	0.505072	0.803527	1.49992	1.02453	FGF1
FGFRL1 Modulation Of FGFR1 Signaling R-HSA-5658623	1/13	0.505072	0.803527	1.49992	1.02453	FGFRL1
Glutamate And Glutamine Metabolism R-HSA-8964539	1/13	0.505072	0.803527	1.49992	1.02453	KYAT1
IRF3-mediated Induction Of Type I IFN R-HSA-3270619	1/13	0.505072	0.803527	1.49992	1.02453	TREX1
Inhibition Of Replication Initiation Of Damaged DNA By RB1/E2F1 R-HSA-113501	1/13	0.505072	0.803527	1.49992	1.02453	PPP2R1B
Mitochondrial Iron-Sulfur Cluster Biogenesis R-HSA-1362409	1/13	0.505072	0.803527	1.49992	1.02453	ISCU
Phospholipase C-mediated Cascade; FGFR3 R-HSA-5654227	1/13	0.505072	0.803527	1.49992	1.02453	FGF1
Purine Salvage R-HSA-74217	1/13	0.505072	0.803527	1.49992	1.02453	ADK
SARS-CoV-2 Targets Host Intracellular Signaling And Regulatory Pathways R-HSA-9755779	1/13	0.505072	0.803527	1.49992	1.02453	YWHAG
Signal Regulatory Protein Family Interactions R-HSA-391160	1/13	0.505072	0.803527	1.49992	1.02453	SIRPG
Synthesis Of PE R-HSA-1483213	1/13	0.505072	0.803527	1.49992	1.02453	PHOSPHO1
TFAP2 (AP-2) Family Regulates Transcription Of Growth Factors And Their Receptors R-HSA-8866910	1/13	0.505072	0.803527	1.49992	1.02453	CGB3
Cellular Senescence R-HSA-2559583	9/165	0.505375	0.803527	1.03841	0.708665	MAPK10;H2AJ;CDKN2B;H3-4;AGO3;H2BC5;CCNE1;CDK2;H2AC19
DNA Replication Pre-Initiation R-HSA-69002	7/127	0.505818	0.803527	1.04994	0.715619	PSMD12;H2AJ;PSMB5;PSMA1;H2BC5;CDK2;H2AC19
Interferon Gamma Signaling R-HSA-877300	5/89	0.506478	0.803527	1.07137	0.728827	SOCS3;IRF7;TRIM14;MID1;JAK1
GSK3B And BTRC:CUL1-mediated-degradation Of NFE2L2 R-HSA-9762114	3/51	0.507492	0.803527	1.12494	0.763019	PSMD12;PSMB5;PSMA1
Cargo Concentration In ER R-HSA-5694530	2/32	0.50797	0.803527	1.19994	0.812757	SAR1B;TMED2
G-protein Beta:Gamma Signaling R-HSA-397795	2/32	0.50797	0.803527	1.19994	0.812757	CDC42;RHOA
Signaling By B Cell Receptor (BCR) R-HSA-983705	6/109	0.515177	0.812053	1.04843	0.695367	PSMD12;PSMB5;PSMA1;PIK3R1;VAV1;PSMA8
Diseases Of Programmed Cell Death R-HSA-9645723	4/71	0.518179	0.812053	1.07451	0.706422	H2AJ;H2BC5;H2AC19;CDC25A
Plasma Lipoprotein Assembly, Remodeling, And Clearance R-HSA-174824	4/71	0.518179	0.812053	1.07451	0.706422	MBTPS1;SAR1B;LPL;PRKACB
G-protein Mediated Events R-HSA-112040	3/52	0.520654	0.812053	1.10192	0.719193	GNAQ;GNAI3;PRKACB
Asparagine N-linked Glycosylation R-HSA-446203	15/282	0.521602	0.812053	1.01102	0.658022	RAB1A;SAR1B;GFPT1;GOSR1;ANK2;ANK3;DPM1;NEU3;PPP6C;TMEM115;TMED2;MAN1A1;TMED7;B4GALT6;ST3GAL3
Assembly Of Pre-Replicative Complex R-HSA-68867	6/110	0.524178	0.812053	1.0383	0.670661	PSMD12;H2AJ;PSMB5;PSMA1;H2BC5;H2AC19
Activation Of Matrix Metalloproteinases R-HSA-1592389	2/33	0.524572	0.812053	1.16117	0.749154	MMP16;MMP1
FGFR2 Mutant Receptor Activation R-HSA-1839126	2/33	0.524572	0.812053	1.16117	0.749154	FGF1;POLR2L
Negative Regulation Of FGFR1 Signaling R-HSA-5654726	2/33	0.524572	0.812053	1.16117	0.749154	SPRY2;FGF1
Oncogene Induced Senescence R-HSA-2559585	2/33	0.524572	0.812053	1.16117	0.749154	CDKN2B;AGO3
Plasma Lipoprotein Remodeling R-HSA-8963899	2/33	0.524572	0.812053	1.16117	0.749154	MBTPS1;LPL
Resolution Of D-loop Structures Thru Holliday Junction Intermediates R-HSA-5693568	2/33	0.524572	0.812053	1.16117	0.749154	RAD51D;BRCA1
Sialic Acid Metabolism R-HSA-4085001	2/33	0.524572	0.812053	1.16117	0.749154	NEU3;ST3GAL3
Signal Amplification R-HSA-392518	2/33	0.524572	0.812053	1.16117	0.749154	GNAQ;GNAI3
Signaling By TGF-beta Receptor Complex R-HSA-170834	5/91	0.52635	0.812053	1.04635	0.671533	CDKN2B;MYC;NEDD4L;CCNC;RHOA
AURKA Activation By TPX2 R-HSA-8854518	4/72	0.529301	0.812053	1.05866	0.673515	HAUS8;AKAP9;CDK1;YWHAG
Signaling By FGFR2 R-HSA-5654738	4/72	0.529301	0.812053	1.05866	0.673515	SPRY2;PIK3R1;FGF1;POLR2L
APC Truncation Mutants Have Impaired AXIN Binding R-HSA-5467337	1/14	0.531146	0.812053	1.38447	0.875978	PPP2R1B
CS/DS Degradation R-HSA-2024101	1/14	0.531146	0.812053	1.38447	0.875978	ARSB
Constitutive Signaling By EGFRvIII R-HSA-5637810	1/14	0.531146	0.812053	1.38447	0.875978	PIK3R1
Creation Of C4 And C2 Activators R-HSA-166786	1/14	0.531146	0.812053	1.38447	0.875978	MASP1
DCC Mediated Attractive Signaling R-HSA-418885	1/14	0.531146	0.812053	1.38447	0.875978	CDC42
FGFR4 Ligand Binding And Activation R-HSA-190322	1/14	0.531146	0.812053	1.38447	0.875978	FGF1
Pentose Phosphate Pathway R-HSA-71336	1/14	0.531146	0.812053	1.38447	0.875978	PRPS2
Prolonged ERK Activation Events R-HSA-169893	1/14	0.531146	0.812053	1.38447	0.875978	CRK
Regulation Of TP53 Activity Thru Association With Co-factors R-HSA-6804759	1/14	0.531146	0.812053	1.38447	0.875978	POU4F1
Response To Metal Ions R-HSA-5660526	1/14	0.531146	0.812053	1.38447	0.875978	SNCB
Role Of LAT2/NTAL/LAB On Calcium Mobilization R-HSA-2730905	1/14	0.531146	0.812053	1.38447	0.875978	PIK3R1
Synthesis Of Bile Acids And Bile Salts Via 24-Hydroxycholesterol R-HSA-193775	1/14	0.531146	0.812053	1.38447	0.875978	CYP46A1
Deposition Of New CENPA-containing Nucleosomes At Centromere R-HSA-606279	3/53	0.533622	0.813021	1.07983	0.678206	H2AJ;H2BC5;H2AC19
Negative Regulation Of NOTCH4 Signaling R-HSA-9604323	3/53	0.533622	0.813021	1.07983	0.678206	PSMD12;PSMB5;PSMA1
Nuclear Envelope Breakdown R-HSA-2980766	3/53	0.533622	0.813021	1.07983	0.678206	NEK7;CDK1;VRK2
Detoxification Of Reactive Oxygen Species R-HSA-3299685	2/34	0.540792	0.819231	1.12482	0.691452	GPX1;GLYAT
Metabolic Disorders Of Biological Oxidation Enzymes R-HSA-5579029	2/34	0.540792	0.819231	1.12482	0.691452	UGT1A1;GCLM
Negative Regulation Of FGFR2 Signaling R-HSA-5654727	2/34	0.540792	0.819231	1.12482	0.691452	SPRY2;FGF1
Synthesis Of Bile Acids And Bile Salts R-HSA-192105	2/34	0.540792	0.819231	1.12482	0.691452	OSBP;CYP46A1
Transcriptional Regulation By E2F6 R-HSA-8953750	2/34	0.540792	0.819231	1.12482	0.691452	CHEK1;BRCA1
Intracellular Signaling By Second Messengers R-HSA-9006925	16/306	0.548016	0.82251	0.992625	0.597014	HDAC5;PSMD12;IRS2;PIK3R1;NR2E1;FGF1;VAV1;PSMA8;PREX2;IL1RL1;PSMB5;PPP2R1B;RRAGC;AGO3;PSMA1;PRKACB
Negative Regulation Of PI3K/AKT Network R-HSA-199418	6/113	0.550759	0.82251	1.00902	0.601841	IL1RL1;PPP2R1B;IRS2;PIK3R1;FGF1;VAV1
Activation Of BAD And Translocation To Mitochondria R-HSA-111447	1/15	0.555849	0.82251	1.28551	0.754928	YWHAG
CTNNB1 S33 Mutants Not Phosphorylated R-HSA-5358747	1/15	0.555849	0.82251	1.28551	0.754928	PPP2R1B
Defects Of Contact Activation System (CAS) And Kallikrein/Kinin System (KKS) R-HSA-9651496	1/15	0.555849	0.82251	1.28551	0.754928	TTF2
Depolymerisation Of Nuclear Lamina R-HSA-4419969	1/15	0.555849	0.82251	1.28551	0.754928	CDK1
EPHA-mediated Growth Cone Collapse R-HSA-3928663	1/15	0.555849	0.82251	1.28551	0.754928	RHOA
ERBB2 Regulates Cell Motility R-HSA-6785631	1/15	0.555849	0.82251	1.28551	0.754928	RHOA
Eicosanoid Ligand-Binding Receptors R-HSA-391903	1/15	0.555849	0.82251	1.28551	0.754928	PTGER3
Fatty Acids R-HSA-211935	1/15	0.555849	0.82251	1.28551	0.754928	CYP4F3
Glycogen Storage Diseases R-HSA-3229121	1/15	0.555849	0.82251	1.28551	0.754928	GYG2
IRAK2 Mediated Activation Of TAK1 Complex Upon TLR7/8 Or 9 Stimulation R-HSA-975163	1/15	0.555849	0.82251	1.28551	0.754928	TLR4
N-Glycan Antennae Elongation R-HSA-975577	1/15	0.555849	0.82251	1.28551	0.754928	B4GALT6
Phospholipase C-mediated Cascade; FGFR4 R-HSA-5654228	1/15	0.555849	0.82251	1.28551	0.754928	FGF1
Regulation Of Innate Immune Responses To Cytosolic DNA R-HSA-3134975	1/15	0.555849	0.82251	1.28551	0.754928	TREX1
Signaling By ERBB2 ECD Mutants R-HSA-9665348	1/15	0.555849	0.82251	1.28551	0.754928	PIK3R1
TRAF3-dependent IRF Activation Pathway R-HSA-918233	1/15	0.555849	0.82251	1.28551	0.754928	IRF7
Gene And Protein Expression By JAK-STAT Signaling After Interleukin-12 Stimulation R-HSA-8950505	2/35	0.556623	0.82251	1.09068	0.638992	CDC42;ANXA2
Impaired BRCA2 Binding To RAD51 R-HSA-9709570	2/35	0.556623	0.82251	1.09068	0.638992	BRCA1;ATRIP
Inwardly Rectifying K+ Channels R-HSA-1296065	2/35	0.556623	0.82251	1.09068	0.638992	KCNJ5;ABCC9
Negative Regulators Of DDX58/IFIH1 Signaling R-HSA-936440	2/35	0.556623	0.82251	1.09068	0.638992	NLRX1;PDZD2
RHOBTB GTPase Cycle R-HSA-9706574	2/35	0.556623	0.82251	1.09068	0.638992	CPSF7;CCT7
ECM Proteoglycans R-HSA-3000178	3/55	0.558949	0.824107	1.03819	0.603911	PTPRS;MUSK;FMOD
Intrinsic Pathway For Apoptosis R-HSA-109606	3/55	0.558949	0.824107	1.03819	0.603911	SEPTIN4;YWHAG;BCL2L1
ISG15 Antiviral Mechanism R-HSA-1169408	4/75	0.561882	0.827383	1.01376	0.584397	PDZD2;ARIH1;EIF4G2;JAK1
Neuronal System R-HSA-112316	20/386	0.56242	0.827383	0.982919	0.565676	GABRB2;KCNJ5;PTPRS;ACTN2;GNAI3;HTR3A;ABCC9;COMT;SYN1;EPB41L5;CACNG8;DLG1;GRM5;GRIN3A;GLRB;ALDH2;PPFIA1;MAPT;PRKACB;CACNG4
Glutathione Conjugation R-HSA-156590	2/36	0.572063	0.829112	1.05854	0.591204	MGST1;GCLM
HSF1-dependent Transactivation R-HSA-3371571	2/36	0.572063	0.829112	1.05854	0.591204	CRYAB;TNFRSF21
Nuclear Pore Complex (NPC) Disassembly R-HSA-3301854	2/36	0.572063	0.829112	1.05854	0.591204	NEK7;CDK1
RHO GTPases Activate WASPs And WAVEs R-HSA-5663213	2/36	0.572063	0.829112	1.05854	0.591204	CDC42;BAIAP2
Protein Ubiquitination R-HSA-8852135	4/76	0.572466	0.829112	0.999629	0.557596	UBE2H;H2BC5;UBA1;UBE2J2
Transcriptional Regulation By Small RNAs R-HSA-5578749	4/76	0.572466	0.829112	0.999629	0.557596	H2AJ;H2BC5;H2AC19;POLR2L
MyD88 Cascade Initiated On Plasma Membrane R-HSA-975871	5/96	0.57439	0.829112	0.988592	0.548121	MAPK10;NLRX1;PPP2R1B;NKIRAS1;NKIRAS2
Epigenetic Regulation Of Gene Expression R-HSA-212165	6/116	0.576646	0.829112	0.981349	0.540259	H2AJ;H2BC5;H2AC19;SUDS3;TTF1;POLR2L
Cell-extracellular Matrix Interactions R-HSA-446353	1/16	0.579251	0.829112	1.19975	0.655085	ILK
FGFR1 Ligand Binding And Activation R-HSA-190242	1/16	0.579251	0.829112	1.19975	0.655085	FGF1
FOXO-mediated Transcription Of Cell Death Genes R-HSA-9614657	1/16	0.579251	0.829112	1.19975	0.655085	BCL6
Gap Junction Assembly R-HSA-190861	1/16	0.579251	0.829112	1.19975	0.655085	GJA1
Hyaluronan Metabolism R-HSA-2142845	1/16	0.579251	0.829112	1.19975	0.655085	ABCC5
PI3K Events In ERBB2 Signaling R-HSA-1963642	1/16	0.579251	0.829112	1.19975	0.655085	PIK3R1
PKA Activation In Glucagon Signaling R-HSA-164378	1/16	0.579251	0.829112	1.19975	0.655085	PRKACB
Phospholipase C-mediated Cascade: FGFR1 R-HSA-5654219	1/16	0.579251	0.829112	1.19975	0.655085	FGF1
Polo-like Kinase Mediated Events R-HSA-156711	1/16	0.579251	0.829112	1.19975	0.655085	CDC25A
Rap1 Signaling R-HSA-392517	1/16	0.579251	0.829112	1.19975	0.655085	PRKACB
STING Mediated Induction Of Host Immune Responses R-HSA-1834941	1/16	0.579251	0.829112	1.19975	0.655085	TREX1
Spry Regulation Of FGF Signaling R-HSA-1295596	1/16	0.579251	0.829112	1.19975	0.655085	SPRY2
Synthesis Of PIPs At Early Endosome Membrane R-HSA-1660516	1/16	0.579251	0.829112	1.19975	0.655085	PIK3C3
TGF-beta Receptor Signaling In EMT (Epithelial To Mesenchymal Transition) R-HSA-2173791	1/16	0.579251	0.829112	1.19975	0.655085	RHOA
TRAF6-mediated Induction Of TAK1 Complex Within TLR4 Complex R-HSA-937072	1/16	0.579251	0.829112	1.19975	0.655085	TLR4
Transcription Of E2F Targets Under Negative Control By P107 (RBL1) And P130 (RBL2) In Complex With HDAC1 R-HSA-1362300	1/16	0.579251	0.829112	1.19975	0.655085	CDK1
mRNA Decay By 3 To 5 Exoribonuclease R-HSA-429958	1/16	0.579251	0.829112	1.19975	0.655085	NT5C3B
Biosynthesis Of N-glycan Precursor (Dolichol LLO) And Transfer To Protein R-HSA-446193	4/77	0.582904	0.830078	0.985883	0.532114	DPM1;NEU3;GFPT1;ST3GAL3
Regulation Of Insulin Secretion R-HSA-422356	4/77	0.582904	0.830078	0.985883	0.532114	GNAQ;ACSL4;ACSL3;PRKACB
Assembly Of Collagen Fibrils And Other Multimeric Structures R-HSA-2022090	3/57	0.583428	0.830078	0.99963	0.538635	COL4A2;LOX;COL4A1
Regulated Necrosis R-HSA-5218859	3/57	0.583428	0.830078	0.99963	0.538635	CASP4;CHMP2B;TNFRSF10B
Signaling By ERBB4 R-HSA-1236394	3/57	0.583428	0.830078	0.99963	0.538635	GABRB2;WWOX;PIK3R1
Anchoring Of Basal Body To Plasma Membrane R-HSA-5620912	5/97	0.583688	0.830078	0.977794	0.526433	HAUS8;AKAP9;TCTN1;CDK1;YWHAG
Cooperation Of PDCL (PhLP1) And TRiC/CCT In G-protein Beta Folding R-HSA-6814122	2/37	0.587107	0.832259	1.02825	0.54759	GNAQ;CCT7
HDR Thru Single Strand Annealing (SSA) R-HSA-5685938	2/37	0.587107	0.832259	1.02825	0.54759	BRCA1;ATRIP
RHOV GTPase Cycle R-HSA-9013424	2/37	0.587107	0.832259	1.02825	0.54759	CDC42;PIK3R1
Hedgehog Off State R-HSA-5610787	5/98	0.592875	0.836031	0.967229	0.50564	PSMD12;PSMB5;PSMA1;PRKACB;PSMA8
COPI-dependent Golgi-to-ER Retrograde Traffic R-HSA-6811434	4/78	0.593194	0.836031	0.972509	0.507877	RAB1A;KIF19;TMED2;TMED7
Constitutive Signaling By Aberrant PI3K In Cancer R-HSA-2219530	4/78	0.593194	0.836031	0.972509	0.507877	IRS2;PIK3R1;FGF1;VAV1
Constitutive Signaling By NOTCH1 HD+PEST Domain Mutants R-HSA-2894862	3/58	0.595338	0.836031	0.981403	0.508981	HDAC5;MYC;CCNC
Acetylcholine Neurotransmitter Release Cycle R-HSA-264642	1/17	0.601421	0.836031	1.1247	0.571867	PPFIA1
Activated Point Mutants Of FGFR2 R-HSA-2033519	1/17	0.601421	0.836031	1.1247	0.571867	FGF1
Beta-catenin Phosphorylation Cascade R-HSA-196299	1/17	0.601421	0.836031	1.1247	0.571867	PPP2R1B
FOXO-mediated Transcription Of Cell Cycle Genes R-HSA-9617828	1/17	0.601421	0.836031	1.1247	0.571867	GADD45A
GAB1 Signalosome R-HSA-180292	1/17	0.601421	0.836031	1.1247	0.571867	PIK3R1
PKA Activation R-HSA-163615	1/17	0.601421	0.836031	1.1247	0.571867	PRKACB
Platelet Sensitization By LDL R-HSA-432142	1/17	0.601421	0.836031	1.1247	0.571867	PPP2R1B
RNA Polymerase III Chain Elongation R-HSA-73780	1/17	0.601421	0.836031	1.1247	0.571867	POLR2L
SHC-mediated cascade:FGFR3 R-HSA-5654704	1/17	0.601421	0.836031	1.1247	0.571867	FGF1
Synthesis Of PIPs At Golgi Membrane R-HSA-1660514	1/17	0.601421	0.836031	1.1247	0.571867	PIK3C3
Tie2 Signaling R-HSA-210993	1/17	0.601421	0.836031	1.1247	0.571867	PIK3R1
Zinc Transporters R-HSA-435354	1/17	0.601421	0.836031	1.1247	0.571867	SLC39A10
Association Of TriC/CCT With Target Proteins During Biosynthesis R-HSA-390471	2/38	0.601755	0.836031	0.99963	0.507716	CCNE1;CCT7
O-glycosylation Of TSR Domain-Containing Proteins R-HSA-5173214	2/38	0.601755	0.836031	0.99963	0.507716	ADAMTSL1;POFUT2
RHO GTPases Activate Formins R-HSA-5663220	6/119	0.601766	0.836031	0.955144	0.485105	CDC42;SGO2;FMNL2;PPP2R1B;RHOA;SKA2
Downstream Signaling Events Of B Cell Receptor (BCR) R-HSA-1168372	4/79	0.603332	0.837328	0.959492	0.48482	PSMD12;PSMB5;PSMA1;PSMA8
GABA Receptor Activation R-HSA-977443	3/59	0.607024	0.841571	0.963827	0.481129	GABRB2;KCNJ5;GNAI3
Elastic Fibre Formation R-HSA-1566948	2/39	0.616008	0.847933	0.972562	0.471202	FBN3;LOX
RHOU GTPase Cycle R-HSA-9013420	2/39	0.616008	0.847933	0.972562	0.471202	CDC42;PIK3R1
SARS-CoV-2 Activates/Modulates Innate And Adaptive Immune Responses R-HSA-9705671	6/121	0.618056	0.847933	0.938433	0.451552	TOMM70;SAR1B;IRF7;PIK3C3;MASP1;JAK1
HDACs Deacetylate Histones R-HSA-3214815	3/60	0.618483	0.847933	0.946867	0.454955	H2BC5;H2AC19;SUDS3
ABC Transporters In Lipid Homeostasis R-HSA-1369062	1/18	0.622424	0.847933	1.05849	0.501865	PEX19
Constitutive Signaling By Ligand-Responsive EGFR Cancer Variants R-HSA-1236382	1/18	0.622424	0.847933	1.05849	0.501865	PIK3R1
Defective GALNT12 Causes CRCS1 R-HSA-5083636	1/18	0.622424	0.847933	1.05849	0.501865	MUC2
Defective GALNT3 Causes HFTC R-HSA-5083625	1/18	0.622424	0.847933	1.05849	0.501865	MUC2
JNK (c-Jun Kinases) Phosphorylation And Activation Mediated By Activated Human TAK1 R-HSA-450321	1/18	0.622424	0.847933	1.05849	0.501865	MAPK10
Lewis Blood Group Biosynthesis R-HSA-9037629	1/18	0.622424	0.847933	1.05849	0.501865	ST3GAL3
Metabolism Of Angiotensinogen To Angiotensins R-HSA-2022377	1/18	0.622424	0.847933	1.05849	0.501865	AGXT
Norepinephrine Neurotransmitter Release Cycle R-HSA-181430	1/18	0.622424	0.847933	1.05849	0.501865	PPFIA1
Phospholipase C-mediated Cascade; FGFR2 R-HSA-5654221	1/18	0.622424	0.847933	1.05849	0.501865	FGF1
Regulation Of NF-kappa B Signaling R-HSA-9758274	1/18	0.622424	0.847933	1.05849	0.501865	NLRX1
Signaling By FLT3 Fusion Proteins R-HSA-9703465	1/18	0.622424	0.847933	1.05849	0.501865	PIK3R1
Synthesis Of Glycosylphosphatidylinositol (GPI) R-HSA-162710	1/18	0.622424	0.847933	1.05849	0.501865	PIGP
Translation R-HSA-72766	14/281	0.622915	0.847933	0.94271	0.446227	HARS1;MRPS26;MRPS27;EIF1AX;MRPL39;MRPS30;SRP68;MRPL35;MRPL53;MRPL3;MRPL1;PPA2;NARS1;PPA1
TP53 Regulates Metabolic Genes R-HSA-5628897	4/81	0.623141	0.847933	0.934471	0.441989	RRAGC;AGO3;TACO1;YWHAG
Ca2+ Pathway R-HSA-4086398	3/61	0.629714	0.8527	0.930493	0.430344	WNT11;AGO3;MYC
Cell-cell Junction Organization R-HSA-421270	3/61	0.629714	0.8527	0.930493	0.430344	CLDN8;ANG;NECTIN1
Regulation Of PTEN Gene Transcription R-HSA-8943724	3/61	0.629714	0.8527	0.930493	0.430344	HDAC5;RRAGC;NR2E1
Class C/3 (Metabotropic Glutamate/Pheromone Receptors) R-HSA-420499	2/40	0.629865	0.8527	0.946918	0.437713	GRM5;TAS2R46
Collagen Degradation R-HSA-1442490	2/40	0.629865	0.8527	0.946918	0.437713	COL25A1;MMP1
Axon Guidance R-HSA-422475	26/519	0.632567	0.855483	0.947647	0.433994	PSMD12;ITSN1;IRS2;PIK3R1;PSMA8;CACNA1G;CDC42;PSMB5;MAGOH;SCN3B;PRKACB;SCN3A;SCN1B;EPHA6;CNTN6;ANK2;ANK3;RHOA;DLG1;PSMA1;COL4A2;PTPRA;COL4A1;PRKCQ;SCN2A;SOS2
Antiviral Mechanism By IFN-stimulated Genes R-HSA-1169410	4/83	0.642312	0.856047	0.910717	0.403157	PDZD2;ARIH1;EIF4G2;JAK1
Transport Of Mature Transcript To Cytoplasm R-HSA-72202	4/83	0.642312	0.856047	0.910717	0.403157	MAGOH;THOC5;WDR33;U2AF1L4
Aflatoxin Activation And Detoxification R-HSA-5423646	1/19	0.642321	0.856047	0.99963	0.442503	MGST1
Defective C1GALT1C1 Causes TNPS R-HSA-5083632	1/19	0.642321	0.856047	0.99963	0.442503	MUC2
FRS-mediated FGFR3 Signaling R-HSA-5654706	1/19	0.642321	0.856047	0.99963	0.442503	FGF1
Na+/Cl- Dependent Neurotransmitter Transporters R-HSA-442660	1/19	0.642321	0.856047	0.99963	0.442503	SLC6A20
Nuclear Events Stimulated By ALK Signaling In Cancer R-HSA-9725371	1/19	0.642321	0.856047	0.99963	0.442503	FN1
PKA-mediated Phosphorylation Of CREB R-HSA-111931	1/19	0.642321	0.856047	0.99963	0.442503	PRKACB
RHO GTPases Activate ROCKs R-HSA-5627117	1/19	0.642321	0.856047	0.99963	0.442503	RHOA
RHO GTPases Activate CIT R-HSA-5625900	1/19	0.642321	0.856047	0.99963	0.442503	RHOA
SHC-mediated cascade:FGFR4 R-HSA-5654719	1/19	0.642321	0.856047	0.99963	0.442503	FGF1
SUMOylation Of Transcription Factors R-HSA-3232118	1/19	0.642321	0.856047	0.99963	0.442503	PIAS2
Signaling By KIT In Disease R-HSA-9669938	1/19	0.642321	0.856047	0.99963	0.442503	PIK3R1
Synthesis, Secretion, And Deacylation Of Ghrelin R-HSA-422085	1/19	0.642321	0.856047	0.99963	0.442503	LEP
Negative Regulation Of MAPK Pathway R-HSA-5675221	2/41	0.643329	0.856047	0.922589	0.406954	PPP2R1B;MARK3
Signaling By Retinoic Acid R-HSA-5362517	2/41	0.643329	0.856047	0.922589	0.406954	ALDH1A1;RDH5
Cargo Recognition For Clathrin-Mediated Endocytosis R-HSA-8856825	5/104	0.645536	0.858122	0.90832	0.397548	CHRM2;FCHO1;ITSN1;VAMP4;AGFG1
Mitotic Prometaphase R-HSA-68877	9/186	0.650063	0.859912	0.914183	0.393726	SGO2;PPP2R1B;HAUS8;AKAP9;NEK7;CDK1;YWHAG;MZT1;SKA2
Autodegradation Of Cdh1 By Cdh1:APC/C R-HSA-174084	3/63	0.65148	0.859912	0.899381	0.385392	PSMD12;PSMB5;PSMA1
Signaling By MET R-HSA-6806834	3/63	0.65148	0.859912	0.899381	0.385392	HPN;PIK3R1;CRK
Integration Of Energy Metabolism R-HSA-163685	5/105	0.653884	0.859912	0.899189	0.381998	PPP2R1B;GNAQ;ACSL4;ACSL3;PRKACB
Activation Of GABAB Receptors R-HSA-991365	2/42	0.656402	0.859912	0.899477	0.378663	KCNJ5;GNAI3
Deactivation Of Beta-Catenin Transactivating Complex R-HSA-3769402	2/42	0.656402	0.859912	0.899477	0.378663	TLE1;SOX6
Intra-Golgi Traffic R-HSA-6811438	2/42	0.656402	0.859912	0.899477	0.378663	GOSR1;MAN1A1
tRNA Modification In Nucleus And Cytosol R-HSA-6782315	2/42	0.656402	0.859912	0.899477	0.378663	TRMT10A;THG1L
Nervous System Development R-HSA-9675108	27/545	0.656852	0.859912	0.936243	0.393499	PSMD12;ITSN1;IRS2;PIK3R1;PSMA8;CACNA1G;CDC42;PSMB5;MAGOH;SCN3B;PRKACB;SCN3A;SCN1B;EPHA6;CNTN6;ANK2;ANK3;RHOA;DLG1;PSMA1;COL4A2;PTPRA;COL4A1;PRKCQ;UTRN;SCN2A;SOS2
Hedgehog On State R-HSA-5632684	4/85	0.660832	0.859912	0.888136	0.367915	PSMD12;PSMB5;PSMA1;PSMA8
Aberrant Regulation Of Mitotic Exit In Cancer Due To RB1 Defects R-HSA-9687136	1/20	0.661171	0.859912	0.946968	0.391802	SKP2
Apoptotic Factor-Mediated Response R-HSA-111471	1/20	0.661171	0.859912	0.946968	0.391802	SEPTIN4
CD209 (DC-SIGN) Signaling R-HSA-5621575	1/20	0.661171	0.859912	0.946968	0.391802	PRKACB
Chondroitin Sulfate Biosynthesis R-HSA-2022870	1/20	0.661171	0.859912	0.946968	0.391802	CHPF2
Class I Peroxisomal Membrane Protein Import R-HSA-9603798	1/20	0.661171	0.859912	0.946968	0.391802	PEX19
FGFR2 Ligand Binding And Activation R-HSA-190241	1/20	0.661171	0.859912	0.946968	0.391802	FGF1
G Beta:Gamma Signaling Thru CDC42 R-HSA-8964616	1/20	0.661171	0.859912	0.946968	0.391802	CDC42
Nef-mediated Downmodulation Of Cell Surface Receptors By Recruitment To Clathrin Adapters R-HSA-164938	1/20	0.661171	0.859912	0.946968	0.391802	CD8B
Phosphorylation Of APC/C R-HSA-176412	1/20	0.661171	0.859912	0.946968	0.391802	CDK1
SHC-mediated cascade:FGFR1 R-HSA-5654688	1/20	0.661171	0.859912	0.946968	0.391802	FGF1
Sema4D Induced Cell Migration And Growth-Cone Collapse R-HSA-416572	1/20	0.661171	0.859912	0.946968	0.391802	RHOA
Signaling By Hippo R-HSA-2028269	1/20	0.661171	0.859912	0.946968	0.391802	STK24
Neutrophil Degranulation R-HSA-6798695	23/468	0.664214	0.862455	0.92843	0.379868	PYGB;ARSA;SERPINB1;ASAH1;AOC1;PSMD12;NHLRC3;ANXA2;NFAM1;MGST1;ANO6;GLYAT;RHOA;DNAJC3;SYNGR1;NAT8;STBD1;QPCT;LAMP2;ORMDL3;TOM1;PGM1;ARSB
RHO GTPase Effectors R-HSA-195258	13/269	0.664429	0.862455	0.912646	0.373114	H2BC5;H2AC19;BAIAP2;RHOA;SKA2;CDC42;SGO2;H2AJ;PDZD2;FMNL2;PPP2R1B;PIK3C3;YWHAG
HIV Infection R-HSA-162906	11/229	0.665727	0.863294	0.906949	0.369015	PSMD12;PSMB5;TAF15;PSMA1;CD8B;TAF13;CHMP2B;NEDD4L;GTF2E2;PSMA8;POLR2L
GPER1 Signaling R-HSA-9634597	2/43	0.66909	0.864455	0.877492	0.352609	GNAI3;PRKACB
SUMOylation Of Transcription Cofactors R-HSA-3899300	2/43	0.66909	0.864455	0.877492	0.352609	PARK7;PIAS2
Cell Junction Organization R-HSA-446728	4/86	0.669845	0.864455	0.877258	0.351525	CLDN8;ILK;ANG;NECTIN1
Transport Of Bile Salts And Organic Acids, Metal Ions And Amine Compounds R-HSA-425366	4/86	0.669845	0.864455	0.877258	0.351525	SLC44A4;SLC5A11;SLC39A10;SLC6A20
Regulation Of PLK1 Activity At G2/M Transition R-HSA-2565942	4/87	0.678691	0.864455	0.866643	0.335901	HAUS8;AKAP9;CDK1;YWHAG
Branched-chain Amino Acid Catabolism R-HSA-70895	1/21	0.679028	0.864455	0.899572	0.348218	HSD17B10
CTLA4 Inhibitory Signaling R-HSA-389513	1/21	0.679028	0.864455	0.899572	0.348218	PPP2R1B
Cobalamin (Cbl, Vitamin B12) Transport And Metabolism R-HSA-196741	1/21	0.679028	0.864455	0.899572	0.348218	MTRR
Deregulated CDK5 Triggers Neurodegenerative Pathways In Alzheimers Disease Models R-HSA-8862803	1/21	0.679028	0.864455	0.899572	0.348218	CDC25A
FRS-mediated FGFR4 Signaling R-HSA-5654712	1/21	0.679028	0.864455	0.899572	0.348218	FGF1
Inflammasomes R-HSA-622312	1/21	0.679028	0.864455	0.899572	0.348218	BCL2L1
Initial Triggering Of Complement R-HSA-166663	1/21	0.679028	0.864455	0.899572	0.348218	MASP1
Intrinsic Pathway Of Fibrin Clot Formation R-HSA-140837	1/21	0.679028	0.864455	0.899572	0.348218	TTF2
Mitochondrial tRNA Aminoacylation R-HSA-379726	1/21	0.679028	0.864455	0.899572	0.348218	PPA2
NOTCH2 Activation And Transmission Of Signal To Nucleus R-HSA-2979096	1/21	0.679028	0.864455	0.899572	0.348218	NOTCH2
Nitric Oxide Stimulates Guanylate Cyclase R-HSA-392154	1/21	0.679028	0.864455	0.899572	0.348218	NANOS1
RHO GTPases Activate PAKs R-HSA-5627123	1/21	0.679028	0.864455	0.899572	0.348218	CDC42
Synthesis Of Leukotrienes (LT) And Eoxins (EX) R-HSA-2142691	1/21	0.679028	0.864455	0.899572	0.348218	CYP4F3
Synthesis, Secretion, And Inactivation Of Glucagon-like Peptide-1 (GLP-1) R-HSA-381771	1/21	0.679028	0.864455	0.899572	0.348218	LEP
Regulation Of mRNA Stability By Proteins That Bind AU-rich Elements R-HSA-450531	4/88	0.687371	0.874235	0.85628	0.321003	PSMD12;PSMB5;PSMA1;PSMA8
Bile Acid And Bile Salt Metabolism R-HSA-194068	2/45	0.693324	0.875885	0.83659	0.306408	OSBP;CYP46A1
Peptide Hormone Metabolism R-HSA-2980736	4/89	0.695884	0.875885	0.846162	0.306795	LEP;CGB3;INHBA;AGXT
RAB GEFs Exchange GTP For GDP On RABs R-HSA-8876198	4/89	0.695884	0.875885	0.846162	0.306795	DENND2D;RAB1A;DENND2B;RIN1
Unfolded Protein Response (UPR) R-HSA-381119	4/89	0.695884	0.875885	0.846162	0.306795	DNAJC3;MBTPS1;WFS1;GFPT1
ADP Signaling Thru P2Y Purinoceptor 12 R-HSA-392170	1/22	0.695945	0.875885	0.85669	0.310537	GNAI3
Blood Group Systems Biosynthesis R-HSA-9033658	1/22	0.695945	0.875885	0.85669	0.310537	ST3GAL3
ERK/MAPK Targets R-HSA-198753	1/22	0.695945	0.875885	0.85669	0.310537	PPP2R1B
FRS-mediated FGFR1 Signaling R-HSA-5654693	1/22	0.695945	0.875885	0.85669	0.310537	FGF1
RNA Polymerase III Transcription Termination R-HSA-73980	1/22	0.695945	0.875885	0.85669	0.310537	POLR2L
SHC-mediated cascade:FGFR2 R-HSA-5654699	1/22	0.695945	0.875885	0.85669	0.310537	FGF1
Signaling By NODAL R-HSA-1181150	1/22	0.695945	0.875885	0.85669	0.310537	ACVR1C
Sensory Perception R-HSA-9709957	30/616	0.698061	0.877714	0.918849	0.330279	OR6K6;OR5K1;TAS2R46;LPL;GUCA1C;OR10AG1;OR52L1;OR5M11;OR2AK2;FNTA;GPC3;OR5AN1;GPC5;SCN3A;GPC6;SCN1B;OR52B6;OR52E2;OR4M2B;SYN1;RBP4;RDH5;PRKCQ;OR8G5;SCN2A;OR2A5;OR4A15;OR4C13;OR2A14;OR5C1
G Alpha (S) Signaling Events R-HSA-418555	7/153	0.701002	0.880129	0.861776	0.306141	GPR27;GNAI3;RLN3;PDE7A;PDE8A;PRKACB;CRHR1
Vesicle-mediated Transport R-HSA-5653656	31/637	0.7019	0.880129	0.918039	0.324953	CHRM2;RAB1A;TMF1;SAR1B;ITSN1;GOSR1;FNBP1L;CLINT1;PPP6C;GJA1;MAP1LC3B;KIF19;FCHO1;TMED2;MAN1A1;TMED7;YWHAG;AGFG1;DENND2D;DENND2B;LNPEP;ANK2;ANK3;PUM1;COL4A2;TMEM115;COL4A1;CHMP2B;MASP1;VAMP4;RIN1
Cellular Responses To Stimuli R-HSA-8953897	36/736	0.701976	0.880129	0.922731	0.326514	PSMD12;TACO1;H2AC19;GLYAT;PSMA8;BAG4;MAP1LC3B;PSMB5;MYC;SKP2;SNCB;ATP6V1F;EGLN1;MBTPS1;CDKN2B;GPX1;H2BC5;ST13;WFS1;GFPT1;FBXL17;WTIP;FABP1;DNAJC3;MAPK10;H2AJ;H3-4;AGO3;PSMA1;RRAGC;CCNE1;CDK2;GCLM;CRYAB;TLR4;TNFRSF21
RNA Polymerase I Transcription Initiation R-HSA-73762	2/46	0.704881	0.882345	0.817533	0.285913	TTF1;POLR2L
Respiratory Electron Transport, ATP Synthesis By Chemiosmotic Coupling, Heat Production By Uncoupling Proteins R-HSA-163200	5/112	0.708727	0.882345	0.840051	0.289217	DMAC2L;UQCRB;TACO1;NDUFAF3;ATP5MF
SARS-CoV-2-host Interactions R-HSA-9705683	9/196	0.709784	0.882345	0.864835	0.296461	TOMM70;GJA1;MAP1LC3B;SAR1B;IRF7;PIK3C3;MASP1;YWHAG;JAK1
Diseases Associated With O-glycosylation Of Proteins R-HSA-3906995	3/69	0.711204	0.882345	0.817359	0.278553	ADAMTSL1;NOTCH2;MUC2
Interleukin-17 Signaling R-HSA-448424	3/69	0.711204	0.882345	0.817359	0.278553	MAPK10;PPP2R1B;IL17RE
RHOB GTPase Cycle R-HSA-9013026	3/69	0.711204	0.882345	0.817359	0.278553	ARHGAP21;STARD13;PIK3R1
Abortive Elongation Of HIV-1 Transcript In Absence Of Tat R-HSA-167242	1/23	0.711971	0.882345	0.817707	0.27779	POLR2L
CD28 Dependent PI3K/Akt Signaling R-HSA-389357	1/23	0.711971	0.882345	0.817707	0.27779	PIK3R1
Glutamate Neurotransmitter Release Cycle R-HSA-210500	1/23	0.711971	0.882345	0.817707	0.27779	PPFIA1
IKK Complex Recruitment Mediated By RIP1 R-HSA-937041	1/23	0.711971	0.882345	0.817707	0.27779	TLR4
Nucleotide Salvage R-HSA-8956321	1/23	0.711971	0.882345	0.817707	0.27779	ADK
RHOBTB2 GTPase Cycle R-HSA-9013418	1/23	0.711971	0.882345	0.817707	0.27779	CCT7
EPH-Ephrin Signaling R-HSA-2682334	4/91	0.712407	0.882345	0.826622	0.280312	CDC42;EPHA6;ITSN1;RHOA
G Alpha (Z) Signaling Events R-HSA-418597	2/47	0.716073	0.885229	0.799323	0.266953	GNAI3;PRKCQ
PLC Beta Mediated Events R-HSA-112043	2/47	0.716073	0.885229	0.799323	0.266953	GNAQ;PRKACB
Cellular Responses To Stress R-HSA-2262752	35/722	0.719373	0.887528	0.913828	0.300992	PSMD12;TACO1;H2AC19;GLYAT;PSMA8;BAG4;MAP1LC3B;PSMB5;MYC;SKP2;ATP6V1F;EGLN1;MBTPS1;CDKN2B;GPX1;H2BC5;ST13;WFS1;GFPT1;FBXL17;WTIP;FABP1;DNAJC3;MAPK10;H2AJ;H3-4;AGO3;PSMA1;RRAGC;CCNE1;CDK2;GCLM;CRYAB;TLR4;TNFRSF21
Signaling By Hedgehog R-HSA-5358351	6/135	0.720776	0.887528	0.835965	0.273718	PSMD12;PSMB5;PSMA1;GPC5;PRKACB;PSMA8
Retrograde Transport At Trans-Golgi-Network R-HSA-6811440	2/48	0.726905	0.887528	0.781905	0.249396	TMF1;VAMP4
APC/C:Cdc20 Mediated Degradation Of Cyclin B R-HSA-174048	1/24	0.727153	0.887528	0.782113	0.249195	CDK1
Defective Intrinsic Pathway For Apoptosis R-HSA-9734009	1/24	0.727153	0.887528	0.782113	0.249195	CDC25A
FRS-mediated FGFR2 Signaling R-HSA-5654700	1/24	0.727153	0.887528	0.782113	0.249195	FGF1
Incretin Synthesis, Secretion, And Inactivation R-HSA-400508	1/24	0.727153	0.887528	0.782113	0.249195	LEP
RUNX2 Regulates Osteoblast Differentiation R-HSA-8940973	1/24	0.727153	0.887528	0.782113	0.249195	CBFB
Sema4D In Semaphorin Signaling R-HSA-400685	1/24	0.727153	0.887528	0.782113	0.249195	RHOA
Signaling By EGFR In Cancer R-HSA-1643713	1/24	0.727153	0.887528	0.782113	0.249195	PIK3R1
Signaling By ERBB2 KD Mutants R-HSA-9664565	1/24	0.727153	0.887528	0.782113	0.249195	PIK3R1
Thromboxane Signaling Thru TP Receptor R-HSA-428930	1/24	0.727153	0.887528	0.782113	0.249195	GNAQ
mTORC1-mediated Signaling R-HSA-166208	1/24	0.727153	0.887528	0.782113	0.249195	RRAGC
Late Phase Of HIV Life Cycle R-HSA-162599	6/136	0.727317	0.887528	0.829491	0.264104	TAF15;TAF13;CHMP2B;NEDD4L;GTF2E2;POLR2L
Netrin-1 Signaling R-HSA-373752	2/49	0.737385	0.894165	0.765229	0.233123	CDC42;PRKCQ
RMTs Methylate Histone Arginines R-HSA-3214858	2/49	0.737385	0.894165	0.765229	0.233123	H2AJ;H2AC19
Signaling By ERBB2 R-HSA-1227986	2/49	0.737385	0.894165	0.765229	0.233123	PIK3R1;RHOA
Interferon Alpha/Beta Signaling R-HSA-909733	3/72	0.737964	0.894165	0.781698	0.237527	SOCS3;IRF7;JAK1
ADP Signaling Thru P2Y Purinoceptor 1 R-HSA-418592	1/25	0.741536	0.894165	0.749485	0.22412	GNAQ
Basigin Interactions R-HSA-210991	1/25	0.741536	0.894165	0.749485	0.22412	MMP1
G Beta:Gamma Signaling Thru PI3Kgamma R-HSA-392451	1/25	0.741536	0.894165	0.749485	0.22412	RHOA
Gap Junction Trafficking R-HSA-190828	1/25	0.741536	0.894165	0.749485	0.22412	GJA1
Glucuronidation R-HSA-156588	1/25	0.741536	0.894165	0.749485	0.22412	UGT1A1
NOTCH3 Intracellular Domain Regulates Transcription R-HSA-9013508	1/25	0.741536	0.894165	0.749485	0.22412	PBX1
Polymerase Switching On C-strand Of Telomere R-HSA-174411	1/25	0.741536	0.894165	0.749485	0.22412	CHTF8
Signaling By ERBB2 In Cancer R-HSA-1227990	1/25	0.741536	0.894165	0.749485	0.22412	PIK3R1
TRP Channels R-HSA-3295583	1/25	0.741536	0.894165	0.749485	0.22412	TRPV6
Intra-Golgi And Retrograde Golgi-to-ER Traffic R-HSA-6811442	8/181	0.742618	0.894656	0.830777	0.247217	RAB1A;KIF19;TMF1;GOSR1;TMED2;MAN1A1;TMED7;VAMP4
Class A/1 (Rhodopsin-like Receptors) R-HSA-373076	15/327	0.744886	0.896572	0.863115	0.254208	CHRM2;XCR1;ANXA1;PTGER3;MLNR;TTF2;OPRM1;HTR5A;PROKR2;P2RY6;P2RY2;GNRH2;RLN3;AGXT;DRD3
Aquaporin-mediated Transport R-HSA-445717	2/50	0.747521	0.896711	0.749247	0.218026	AQP7;PRKACB
Neurotransmitter Release Cycle R-HSA-112310	2/50	0.747521	0.896711	0.749247	0.218026	PPFIA1;SYN1
Formation Of Cornified Envelope R-HSA-6809371	3/74	0.754686	0.896711	0.759598	0.213791	SPRR2G;SPINK6;LCE3E
Transport Of Mature mRNA Derived From An Intron-Containing Transcript R-HSA-159236	3/74	0.754686	0.896711	0.759598	0.213791	MAGOH;THOC5;U2AF1L4
Attenuation Phase R-HSA-3371568	1/26	0.755161	0.896711	0.719468	0.202044	TNFRSF21
Cholesterol Biosynthesis R-HSA-191273	1/26	0.755161	0.896711	0.719468	0.202044	DHCR24
Downregulation Of TGF-beta Receptor Signaling R-HSA-2173788	1/26	0.755161	0.896711	0.719468	0.202044	NEDD4L
FGFR2 Alternative Splicing R-HSA-6803529	1/26	0.755161	0.896711	0.719468	0.202044	POLR2L
Formation Of Tubulin Folding Intermediates By CCT/TriC R-HSA-389960	1/26	0.755161	0.896711	0.719468	0.202044	CCT7
Insulin Receptor Recycling R-HSA-77387	1/26	0.755161	0.896711	0.719468	0.202044	ATP6V1F
Metal Ion SLC Transporters R-HSA-425410	1/26	0.755161	0.896711	0.719468	0.202044	SLC39A10
N-glycan Antennae Elongation In medial/trans-Golgi R-HSA-975576	1/26	0.755161	0.896711	0.719468	0.202044	B4GALT6
RNA Polymerase III Transcription Initiation From Type 2 Promoter R-HSA-76066	1/26	0.755161	0.896711	0.719468	0.202044	POLR2L
Role Of Phospholipids In Phagocytosis R-HSA-2029485	1/26	0.755161	0.896711	0.719468	0.202044	PIK3R1
Synthesis Of IP3 And IP4 In Cytosol R-HSA-1855204	1/26	0.755161	0.896711	0.719468	0.202044	ITPKA
Translocation Of SLC2A4 (GLUT4) To Plasma Membrane R-HSA-1445148	2/51	0.757318	0.898142	0.733917	0.204009	LNPEP;YWHAG
EML4 And NUDC In Mitotic Spindle Formation R-HSA-9648025	4/97	0.757997	0.898142	0.773046	0.214192	SGO2;PPP2R1B;NEK7;SKA2
C-type Lectin Receptors (CLRs) R-HSA-5621481	6/141	0.758401	0.898142	0.798557	0.220836	PSMD12;MUC2;PSMB5;PSMA1;PRKACB;PSMA8
Nuclear Envelope (NE) Reassembly R-HSA-2995410	3/75	0.76272	0.900728	0.749008	0.20288	CHMP2B;CDK1;VRK2
Clathrin-mediated Endocytosis R-HSA-8856828	6/142	0.764294	0.900728	0.792643	0.213064	CHRM2;FCHO1;ITSN1;FNBP1L;VAMP4;AGFG1
G Alpha (I) Signaling Events R-HSA-418594	14/312	0.767766	0.900728	0.843241	0.222843	CHRM2;ANXA1;PTGER3;TAS2R46;GNAI3;OPRM1;HTR5A;RGS3;PPP2R1B;GNAQ;RLN3;AGXT;PRKACB;DRD3
BMAL1:CLOCK,NPAS2 Activates Circadian Gene Expression R-HSA-1368108	1/27	0.768068	0.900728	0.691759	0.182539	NOCT
Endogenous Sterols R-HSA-211976	1/27	0.768068	0.900728	0.691759	0.182539	CYP46A1
Gap Junction Trafficking And Regulation R-HSA-157858	1/27	0.768068	0.900728	0.691759	0.182539	GJA1
RNA Pol II CTD Phosphorylation And Interaction With CE R-HSA-77075	1/27	0.768068	0.900728	0.691759	0.182539	POLR2L
RNA Polymerase III Transcription Initiation From Type 1 Promoter R-HSA-76061	1/27	0.768068	0.900728	0.691759	0.182539	POLR2L
RNA Polymerase III Transcription Initiation From Type 3 Promoter R-HSA-76071	1/27	0.768068	0.900728	0.691759	0.182539	POLR2L
Role Of Nef In HIV-1 Replication And Disease Pathogenesis R-HSA-164952	1/27	0.768068	0.900728	0.691759	0.182539	CD8B
VEGFR2 Mediated Vascular Permeability R-HSA-5218920	1/27	0.768068	0.900728	0.691759	0.182539	VAV1
Membrane Trafficking R-HSA-199991	28/599	0.76992	0.902014	0.879122	0.229863	CHRM2;RAB1A;TMF1;SAR1B;ITSN1;GOSR1;FNBP1L;CLINT1;PPP6C;GJA1;MAP1LC3B;KIF19;FCHO1;TMED2;MAN1A1;TMED7;YWHAG;AGFG1;DENND2D;DENND2B;LNPEP;ANK2;ANK3;PUM1;TMEM115;CHMP2B;VAMP4;RIN1
CLEC7A (Dectin-1) Signaling R-HSA-5607764	4/99	0.77189	0.902014	0.756691	0.195917	PSMD12;PSMB5;PSMA1;PSMA8
Cellular Response To Heat Stress R-HSA-3371556	4/99	0.77189	0.902014	0.756691	0.195917	BAG4;ST13;CRYAB;TNFRSF21
SLC Transporter Disorders R-HSA-5619102	4/99	0.77189	0.902014	0.756691	0.195917	SLC35A3;SLC20A2;SLC6A20;MAP4K5
Ion Transport By P-type ATPases R-HSA-936837	2/53	0.775928	0.904411	0.705061	0.178871	ATP7B;ATP9B
Nucleotide-binding Domain, Leucine Rich Repeat Containing NLR Signaling Pathways R-HSA-168643	2/53	0.775928	0.904411	0.705061	0.178871	CASP4;BCL2L1
Rab Regulation Of Trafficking R-HSA-9007101	5/122	0.77599	0.904411	0.767844	0.194737	DENND2D;RAB1A;MAP1LC3B;DENND2B;RIN1
Signaling By ROBO Receptors R-HSA-376176	9/209	0.776943	0.90465	0.80806	0.203945	CDC42;PSMD12;PSMB5;PSMA1;MAGOH;PRKACB;SOS2;RHOA;PSMA8
TNFR2 Non-Canonical NF-kB Pathway R-HSA-5668541	4/100	0.778597	0.90465	0.748769	0.187388	PSMD12;PSMB5;PSMA1;PSMA8
MET Promotes Cell Motility R-HSA-8875878	1/28	0.780296	0.90465	0.666103	0.165248	CRK
Prefoldin Mediated Transfer Of Substrate To CCT/TriC R-HSA-389957	1/28	0.780296	0.90465	0.666103	0.165248	CCT7
TRAF6 Mediated IRF7 Activation R-HSA-933541	1/28	0.780296	0.90465	0.666103	0.165248	IRF7
mRNA Splicing R-HSA-72172	8/189	0.783869	0.90465	0.793719	0.193282	CPSF7;MAGOH;DDX42;SNU13;SNRNP35;WDR33;U2AF1L4;POLR2L
Mitotic Anaphase R-HSA-68882	10/232	0.784588	0.90465	0.808695	0.196187	SGO2;PSMD12;PSMB5;PPP2R1B;PSMA1;CHMP2B;CDK1;VRK2;SKA2;PSMA8
Organelle Biogenesis And Maintenance R-HSA-1852241	12/275	0.787186	0.90465	0.818926	0.195961	DYNC2LI1;DMAC2L;CHCHD3;ACSS2;MTX1;HAUS8;AKAP9;TCTN1;DNAJC11;CDK1;ATP5MF;YWHAG
Mitotic Metaphase And Anaphase R-HSA-2555396	10/233	0.788935	0.90465	0.805025	0.190849	SGO2;PSMD12;PSMB5;PPP2R1B;PSMA1;CHMP2B;CDK1;VRK2;SKA2;PSMA8
Activation Of G Protein Gated Potassium Channels R-HSA-1296041	1/29	0.791879	0.90465	0.64228	0.149874	KCNJ5
Activation Of Kainate Receptors Upon Glutamate Binding R-HSA-451326	1/29	0.791879	0.90465	0.64228	0.149874	DLG1
Dectin-2 Family R-HSA-5621480	1/29	0.791879	0.90465	0.64228	0.149874	MUC2
Disassembly Of Destruction Complex And Recruitment Of AXIN To Membrane R-HSA-4641262	1/29	0.791879	0.90465	0.64228	0.149874	PPP2R1B
EGR2 And SOX10-mediated Initiation Of Schwann Cell Myelination R-HSA-9619665	1/29	0.791879	0.90465	0.64228	0.149874	UTRN
Energy Dependent Regulation Of mTOR By LKB1-AMPK R-HSA-380972	1/29	0.791879	0.90465	0.64228	0.149874	RRAGC
FOXO-mediated Transcription Of Oxidative Stress, Metabolic And Neuronal Genes R-HSA-9615017	1/29	0.791879	0.90465	0.64228	0.149874	GLYAT
HSF1 Activation R-HSA-3371511	1/29	0.791879	0.90465	0.64228	0.149874	TNFRSF21
Myogenesis R-HSA-525793	1/29	0.791879	0.90465	0.64228	0.149874	CDC42
Regulation Of TP53 Activity Thru Acetylation R-HSA-6804758	1/29	0.791879	0.90465	0.64228	0.149874	PDZD2
Regulation Of Necroptotic Cell Death R-HSA-5675482	1/29	0.791879	0.90465	0.64228	0.149874	TNFRSF10B
mRNA Capping R-HSA-72086	1/29	0.791879	0.90465	0.64228	0.149874	POLR2L
Amino Acids Regulate mTORC1 R-HSA-9639288	2/55	0.793277	0.90465	0.678384	0.157102	RRAGC;ATP6V1F
Golgi Associated Vesicle Biogenesis R-HSA-432722	2/55	0.793277	0.90465	0.678384	0.157102	PUM1;CLINT1
Regulation Of Cholesterol Biosynthesis By SREBP (SREBF) R-HSA-1655829	2/55	0.793277	0.90465	0.678384	0.157102	MBTPS1;SAR1B
Signaling By ALK Fusions And Activated Point Mutants R-HSA-9725370	2/55	0.793277	0.90465	0.678384	0.157102	FN1;PIK3R1
Separation Of Sister Chromatids R-HSA-2467813	7/170	0.79719	0.90833	0.7712	0.174802	SGO2;PSMD12;PSMB5;PPP2R1B;PSMA1;SKA2;PSMA8
E3 Ubiquitin Ligases Ubiquitinate Target Proteins R-HSA-8866654	2/56	0.801499	0.909305	0.665786	0.14732	H2BC5;UBE2J2
HIV Life Cycle R-HSA-162587	6/149	0.802584	0.909305	0.753562	0.165722	TAF15;TAF13;CHMP2B;NEDD4L;GTF2E2;POLR2L
Activation Of BH3-only Proteins R-HSA-114452	1/30	0.802853	0.909305	0.6201	0.136164	YWHAG
Endosomal Sorting Complex Required For Transport (ESCRT) R-HSA-917729	1/30	0.802853	0.909305	0.6201	0.136164	CHMP2B
Tight Junction Interactions R-HSA-420029	1/30	0.802853	0.909305	0.6201	0.136164	CLDN8
Transcriptional Regulation Of Pluripotent Stem Cells R-HSA-452723	1/30	0.802853	0.909305	0.6201	0.136164	PBX1
Translation Of Structural Proteins R-HSA-9683701	1/30	0.802853	0.909305	0.6201	0.136164	ST3GAL3
Regulation Of HSF1-mediated Heat Shock Response R-HSA-3371453	3/81	0.806518	0.910425	0.691172	0.148622	BAG4;ST13;TNFRSF21
Cytoprotection By HMOX1 R-HSA-9707564	2/57	0.809429	0.910425	0.653646	0.138198	FABP1;TACO1
Neurexins And Neuroligins R-HSA-6794361	2/57	0.809429	0.910425	0.653646	0.138198	EPB41L5;GRM5
PI3K/AKT Signaling In Cancer R-HSA-2219528	4/105	0.809815	0.910425	0.711512	0.150093	IRS2;PIK3R1;FGF1;VAV1
tRNA Processing R-HSA-72306	4/105	0.809815	0.910425	0.711512	0.150093	TRMT10A;HSD17B10;TRMT61B;THG1L
Activated NOTCH1 Transmits Signal To Nucleus R-HSA-2122948	1/31	0.813248	0.910425	0.599398	0.123907	DTX1
Downregulation Of SMAD2/3:SMAD4 Transcriptional Activity R-HSA-2173795	1/31	0.813248	0.910425	0.599398	0.123907	NEDD4L
Pausing And Recovery Of Tat-mediated HIV Elongation R-HSA-167238	1/31	0.813248	0.910425	0.599398	0.123907	POLR2L
RIPK1-mediated Regulated Necrosis R-HSA-5213460	1/31	0.813248	0.910425	0.599398	0.123907	TNFRSF10B
RUNX2 Regulates Bone Development R-HSA-8941326	1/31	0.813248	0.910425	0.599398	0.123907	CBFB
Regulation Of MECP2 Expression And Activity R-HSA-9022692	1/31	0.813248	0.910425	0.599398	0.123907	AGO3
Sealing Of Nuclear Envelope (NE) By ESCRT-III R-HSA-9668328	1/31	0.813248	0.910425	0.599398	0.123907	CHMP2B
Transferrin Endocytosis And Recycling R-HSA-917977	1/31	0.813248	0.910425	0.599398	0.123907	ATP6V1F
HATs Acetylate Histones R-HSA-3214847	4/106	0.815607	0.910425	0.704499	0.143593	H2BC5;TRRAP;H2AC19;JADE1
Resolution Of Sister Chromatid Cohesion R-HSA-2500257	4/106	0.815607	0.910425	0.704499	0.143593	SGO2;PPP2R1B;CDK1;SKA2
Peptide Ligand-Binding Receptors R-HSA-375276	8/196	0.81579	0.910425	0.763881	0.155524	PROKR2;XCR1;ANXA1;MLNR;RLN3;TTF2;OPRM1;AGXT
SUMOylation R-HSA-2990846	7/174	0.816015	0.910425	0.752568	0.153014	THRA;VDR;PARK7;BRCA1;SENP2;NR2C1;PIAS2
Formation Of RNA Pol II Elongation Complex R-HSA-112382	2/58	0.817075	0.910425	0.64194	0.129688	EAF1;POLR2L
Late SARS-CoV-2 Infection Events R-HSA-9772573	2/58	0.817075	0.910425	0.64194	0.129688	ZDHHC9;ST3GAL3
Host Interactions Of HIV Factors R-HSA-162909	5/130	0.82068	0.910425	0.718397	0.141971	PSMD12;PSMB5;CD8B;PSMA1;PSMA8
Metabolism Of Steroids R-HSA-8957322	6/153	0.822197	0.910425	0.732901	0.143484	MBTPS1;SAR1B;VDR;OSBP;DHCR24;CYP46A1
Activation Of Pre-Replicative Complex R-HSA-68962	1/32	0.823096	0.910425	0.580032	0.112922	CDK2
Defective TPR May Confer Susceptibility Towards Thyroid Papillary Carcinoma (TPC) R-HSA-5619107	1/32	0.823096	0.910425	0.580032	0.112922	MAP4K5
Generation Of Second Messenger Molecules R-HSA-202433	1/32	0.823096	0.910425	0.580032	0.112922	SPNS1
Glucagon Signaling In Metabolic Regulation R-HSA-163359	1/32	0.823096	0.910425	0.580032	0.112922	PRKACB
Gluconeogenesis R-HSA-70263	1/32	0.823096	0.910425	0.580032	0.112922	G6PC2
Nuclear Signaling By ERBB4 R-HSA-1251985	1/32	0.823096	0.910425	0.580032	0.112922	WWOX
Signaling By NOTCH2 R-HSA-1980145	1/32	0.823096	0.910425	0.580032	0.112922	NOTCH2
ADORA2B Mediated Anti-Inflammatory Cytokine Production R-HSA-9660821	5/131	0.825725	0.911605	0.712658	0.136469	GPR27;GNAI3;RLN3;PRKACB;CRHR1
Degradation Of Extracellular Matrix R-HSA-1474228	4/109	0.83212	0.911605	0.684262	0.125753	MMP16;CAPN7;COL25A1;MMP1
Interferon Signaling R-HSA-913531	8/200	0.832338	0.911605	0.747807	0.137235	SOCS3;PDZD2;IRF7;TRIM14;ARIH1;MID1;EIF4G2;JAK1
CaM Pathway R-HSA-111997	1/33	0.832425	0.911605	0.561876	0.103055	PRKACB
Cooperation Of Prefoldin And TriC/CCT In Actin And Tubulin Folding R-HSA-389958	1/33	0.832425	0.911605	0.561876	0.103055	CCT7
Formation Of Early Elongation Complex R-HSA-113418	1/33	0.832425	0.911605	0.561876	0.103055	POLR2L
HIV Elongation Arrest And Recovery R-HSA-167287	1/33	0.832425	0.911605	0.561876	0.103055	POLR2L
NOD1/2 Signaling Pathway R-HSA-168638	1/33	0.832425	0.911605	0.561876	0.103055	CASP4
Signaling By WNT In Cancer R-HSA-4791275	1/33	0.832425	0.911605	0.561876	0.103055	PPP2R1B
Signaling To ERKs R-HSA-187687	1/33	0.832425	0.911605	0.561876	0.103055	CRK
Striated Muscle Contraction R-HSA-390522	1/33	0.832425	0.911605	0.561876	0.103055	ACTN2
Telomere C-strand (Lagging Strand) Synthesis R-HSA-174417	1/33	0.832425	0.911605	0.561876	0.103055	CHTF8
Nuclear Events (Kinase And Transcription Factor Activation) R-HSA-198725	2/61	0.838389	0.917377	0.609202	0.107386	EGR3;PPP2R1B
MAP Kinase Activation R-HSA-450294	2/62	0.844978	0.923575	0.599017	0.100901	MAPK10;PPP2R1B
mRNA Splicing - Major Pathway R-HSA-72163	7/181	0.845656	0.923575	0.722023	0.121041	CPSF7;MAGOH;DDX42;SNU13;WDR33;U2AF1L4;POLR2L
Golgi-to-ER Retrograde Transport R-HSA-8856688	4/112	0.847381	0.923575	0.665148	0.110152	RAB1A;KIF19;TMED2;TMED7
Factors Involved In Megakaryocyte Development And Platelet Production R-HSA-983231	5/136	0.849249	0.923575	0.685275	0.111976	CDC42;KIF19;CDK2;PRKACB;GATA1
Beta Defensins R-HSA-1461957	1/35	0.849634	0.923575	0.528769	0.0861629	DEFB125
Ca-dependent Events R-HSA-111996	1/35	0.849634	0.923575	0.528769	0.0861629	PRKACB
RNA Polymerase III Transcription Initiation R-HSA-76046	1/35	0.849634	0.923575	0.528769	0.0861629	POLR2L
RUNX1 Interacts With Co-Factors Whose Precise Effect On RUNX1 Targets Is Not Known R-HSA-8939243	1/35	0.849634	0.923575	0.528769	0.0861629	CBFB
Infectious Disease R-HSA-5663205	44/961	0.853921	0.926948	0.857409	0.135399	GPR27;PSMD12;SAR1B;GNAI3;H2AC19;NEDD4L;ANTXR2;COMT;GTF2E2;CRHR1;PSMA8;CDC42;MAP1LC3B;GJA1;PSMB5;FNTA;SV2B;GPC3;GPC5;SUDS3;PRKACB;GPC6;YWHAG;JAK1;ST3GAL3;POLR2L;TOMM70;TAF15;H2BC5;TAF13;SIGMAR1;BAIAP2;VAV1;DNAJC3;PSMA1;ZDHHC9;CD8B;CHMP2B;IRF7;RLN3;PIK3C3;MASP1;CRK;ISCU
Antimicrobial Peptides R-HSA-6803157	3/89	0.854137	0.926948	0.626611	0.0987941	DEFB125;EPPIN;CLU
Mitochondrial Fatty Acid Beta-Oxidation R-HSA-77289	1/36	0.857564	0.928385	0.513634	0.0789246	PCCA
NR1H3 And NR1H2 Regulate Gene Expression Linked To Cholesterol Transport And Efflux R-HSA-9029569	1/36	0.857564	0.928385	0.513634	0.0789246	AGO3
RHOH GTPase Cycle R-HSA-9013407	1/36	0.857564	0.928385	0.513634	0.0789246	FAM91A1
Chaperonin-mediated Protein Folding R-HSA-390466	3/90	0.859306	0.928752	0.619376	0.0939162	CCNE1;GNAQ;CCT7
Respiratory Electron Transport R-HSA-611105	3/90	0.859306	0.928752	0.619376	0.0939162	UQCRB;TACO1;NDUFAF3
Cytochrome P450 - Arranged By Substrate Type R-HSA-211897	2/65	0.863305	0.931188	0.570402	0.0838416	CYP4F3;CYP46A1
HCMV Late Events R-HSA-9610379	3/91	0.864314	0.931188	0.612305	0.089286	H2BC5;CHMP2B;H2AC19
Citric Acid (TCA) Cycle And Respiratory Electron Transport R-HSA-1428517	6/163	0.86448	0.931188	0.685854	0.0998788	DMAC2L;UQCRB;TACO1;ADHFE1;NDUFAF3;ATP5MF
Defective B3GALTL Causes PpS R-HSA-5083635	1/37	0.865077	0.931188	0.49934	0.0723728	ADAMTSL1
FLT3 Signaling R-HSA-9607240	1/37	0.865077	0.931188	0.49934	0.0723728	PIK3R1
Developmental Biology R-HSA-1266738	49/1073	0.870548	0.935806	0.854227	0.118423	ITSN1;H2AC19;CCNC;IRS2;MYC;MAGOH;PRKACB;SCN1B;EPHA6;SPINK6;ANK2;ANK3;KRTAP19-3;PIAS2;RHOA;MED7;H2AJ;PSMA1;COL4A2;COL4A1;PRKCQ;HOXB1;UTRN;SOS2;PSMD12;SPRR2G;CBFB;LPL;PIK3R1;PSMA8;CACNA1G;CDC42;CACNG8;PSMB5;ACVR1C;SCN3B;SCN3A;CACNG4;POLR2L;H2BC5;CNTN6;PBX1;LCE3E;MED13L;DLG1;PTPRA;LEP;CDK2;SCN2A
FCGR3A-mediated IL10 Synthesis R-HSA-9664323	1/38	0.872194	0.935806	0.485819	0.0664327	PRKACB
Fanconi Anemia Pathway R-HSA-6783310	1/38	0.872194	0.935806	0.485819	0.0664327	ATRIP
Resolution Of Abasic Sites (AP Sites) R-HSA-73933	1/38	0.872194	0.935806	0.485819	0.0664327	MUTYH
Unattached Kinetochores Signal Amplification Via A MAD2 Inhibitory Signal R-HSA-141444	3/93	0.873861	0.936835	0.598635	0.0807164	SGO2;PPP2R1B;SKA2
DAG And IP3 Signaling R-HSA-1489509	1/39	0.878935	0.939234	0.473009	0.0610389	PRKACB
NGF-stimulated Transcription R-HSA-9031628	1/39	0.878935	0.939234	0.473009	0.0610389	EGR3
SUMOylation Of Ubiquitinylation Proteins R-HSA-3232142	1/39	0.878935	0.939234	0.473009	0.0610389	PIAS2
Transcriptional Regulation By VENTX R-HSA-8853884	1/39	0.878935	0.939234	0.473009	0.0610389	AGO3
SUMO E3 Ligases SUMOylate Target Proteins R-HSA-3108232	6/168	0.882283	0.942051	0.664509	0.0832247	THRA;VDR;PARK7;BRCA1;NR2C1;PIAS2
Expression And Translocation Of Olfactory Receptors R-HSA-9752946	16/393	0.885129	0.94336	0.759997	0.0927365	OR6K6;OR52E2;OR4M2B;OR5K1;OR10AG1;OR52L1;OR5M11;OR2AK2;OR5AN1;OR8G5;OR2A5;OR4A15;OR52B6;OR4C13;OR2A14;OR5C1
RNA Polymerase III Abortive And Retractive Initiation R-HSA-749476	1/40	0.885322	0.94336	0.460856	0.0561341	POLR2L
GPCR Ligand Binding R-HSA-500792	19/458	0.885647	0.94336	0.77469	0.0940757	CHRM2;ANXA1;XCR1;PTGER3;MLNR;TAS2R46;TTF2;OPRM1;HTR5A;CRHR1;PROKR2;P2RY6;GRM5;WNT11;P2RY2;GNRH2;RLN3;AGXT;DRD3
Protein Folding R-HSA-391251	3/96	0.887066	0.944112	0.579232	0.0694127	CCNE1;GNAQ;CCT7
Intraflagellar Transport R-HSA-5620924	1/41	0.891372	0.947172	0.449311	0.051668	DYNC2LI1
MTOR Signaling R-HSA-165159	1/41	0.891372	0.947172	0.449311	0.051668	RRAGC
trans-Golgi Network Vesicle Budding R-HSA-199992	2/71	0.89413	0.948693	0.520636	0.0582612	PUM1;CLINT1
Processing Of Capped Intron-Containing Pre-mRNA R-HSA-72203	9/242	0.895605	0.948693	0.692393	0.07634	CPSF7;MAGOH;DDX42;SNU13;SNRNP35;THOC5;WDR33;U2AF1L4;POLR2L
Glucagon-like Peptide-1 (GLP1) Regulates Insulin Secretion R-HSA-381676	1/42	0.897103	0.948693	0.438329	0.047596	PRKACB
Kinesins R-HSA-983189	1/42	0.897103	0.948693	0.438329	0.047596	KIF19
Transport Of Mature mRNA Derived From An Intronless Transcript R-HSA-159231	1/42	0.897103	0.948693	0.438329	0.047596	WDR33
Vasopressin Regulates Renal Water Homeostasis Via Aquaporins R-HSA-432040	1/42	0.897103	0.948693	0.438329	0.047596	PRKACB
Olfactory Signaling Pathway R-HSA-381753	16/401	0.901843	0.950247	0.743884	0.0768546	OR6K6;OR52E2;OR4M2B;OR5K1;OR10AG1;OR52L1;OR5M11;OR2AK2;OR5AN1;OR8G5;OR2A5;OR4A15;OR52B6;OR4C13;OR2A14;OR5C1
Defensins R-HSA-1461973	1/43	0.902531	0.950247	0.42787	0.0438788	DEFB125
Formation Of HIV-1 Elongation Complex Containing HIV-1 Tat R-HSA-167200	1/43	0.902531	0.950247	0.42787	0.0438788	POLR2L
Transport Of Mature mRNAs Derived From Intronless Transcripts R-HSA-159234	1/43	0.902531	0.950247	0.42787	0.0438788	WDR33
Transport Of Vitamins, Nucleosides, And Related Molecules R-HSA-425397	1/43	0.902531	0.950247	0.42787	0.0438788	SLC35A3
Extra-nuclear Estrogen Signaling R-HSA-9009391	2/73	0.902878	0.950247	0.505917	0.0516883	GNAI3;PIK3R1
TGF-beta Receptor Signaling Activates SMADs R-HSA-2173789	1/44	0.907674	0.953266	0.417897	0.0404817	NEDD4L
TNF Signaling R-HSA-75893	1/44	0.907674	0.953266	0.417897	0.0404817	BAG4
Leishmania Infection R-HSA-9658195	9/247	0.907907	0.953266	0.677666	0.0654716	GPR27;CDC42;GNAI3;RLN3;BAIAP2;PRKACB;CRK;CRHR1;VAV1
Formation Of HIV Elongation Complex In Absence Of HIV Tat R-HSA-167152	1/45	0.912546	0.955107	0.408378	0.0373736	POLR2L
Heme Signaling R-HSA-9707616	1/45	0.912546	0.955107	0.408378	0.0373736	TLR4
Interleukin-10 Signaling R-HSA-6783783	1/45	0.912546	0.955107	0.408378	0.0373736	JAK1
TBC/RABGAPs R-HSA-8854214	1/45	0.912546	0.955107	0.408378	0.0373736	MAP1LC3B
SUMOylation Of DNA Damage Response And Repair Proteins R-HSA-3108214	2/76	0.914742	0.95665	0.485329	0.0432492	BRCA1;PIAS2
MHC Class II Antigen Presentation R-HSA-2132295	3/104	0.916433	0.957662	0.533126	0.0465238	SAR1B;CTSF;CTSE
NR1H2 And NR1H3-mediated Signaling R-HSA-9024446	1/46	0.91716	0.957666	0.399282	0.034527	AGO3
Viral Messenger RNA Synthesis R-HSA-168325	1/47	0.921532	0.961472	0.390581	0.0319175	POLR2L
Inositol Phosphate Metabolism R-HSA-1483249	1/48	0.925673	0.965032	0.382251	0.0295229	ITPKA
EPH-ephrin Mediated Repulsion Of Cells R-HSA-3928665	1/49	0.929595	0.967598	0.374267	0.0273237	EPHA6
Signaling By NOTCH3 R-HSA-9012852	1/49	0.929595	0.967598	0.374267	0.0273237	PBX1
Cilium Assembly R-HSA-5617833	6/186	0.930878	0.968172	0.597485	0.0427961	DYNC2LI1;HAUS8;AKAP9;TCTN1;CDK1;YWHAG
Formation Of Ternary Complex, And Subsequently, 43S Complex R-HSA-72695	1/50	0.933311	0.969576	0.36661	0.0253021	EIF1AX
Mitotic Spindle Checkpoint R-HSA-69618	3/110	0.933693	0.969576	0.503071	0.0345144	SGO2;PPP2R1B;SKA2
PI Metabolism R-HSA-1483255	2/82	0.934501	0.969654	0.448787	0.0304022	PIK3C3;PIK3R1
Complex I Biogenesis R-HSA-6799198	1/51	0.936831	0.970319	0.359259	0.0234424	NDUFAF3
Synthesis Of PIPs At Plasma Membrane R-HSA-1660499	1/51	0.936831	0.970319	0.359259	0.0234424	PIK3R1
Platelet Homeostasis R-HSA-418346	2/83	0.93734	0.970319	0.443223	0.0286808	NANOS1;PPP2R1B
Anti-inflammatory Response Favoring Leishmania Infection R-HSA-9662851	5/165	0.939218	0.970966	0.560204	0.0351288	GPR27;GNAI3;RLN3;PRKACB;CRHR1
Formation Of TC-NER Pre-Incision Complex R-HSA-6781823	1/52	0.940165	0.970966	0.352196	0.0217303	POLR2L
Transcriptional Activation Of Mitochondrial Biogenesis R-HSA-2151201	1/52	0.940165	0.970966	0.352196	0.0217303	ACSS2
Regulation Of Expression Of SLITs And ROBOs R-HSA-9010553	5/167	0.943123	0.973262	0.553229	0.0323962	PSMD12;PSMB5;PSMA1;MAGOH;PSMA8
Pyruvate Metabolism And Citric Acid (TCA) Cycle R-HSA-71406	1/54	0.946316	0.975796	0.338869	0.0186985	ADHFE1
Chemokine Receptors Bind Chemokines R-HSA-380108	1/56	0.951834	0.979531	0.326512	0.0161181	XCR1
Deadenylation-dependent mRNA Decay R-HSA-429914	1/56	0.951834	0.979531	0.326512	0.0161181	NT5C3B
rRNA Processing R-HSA-72312	6/199	0.953985	0.979531	0.556854	0.0262318	RRP7A;DDX49;WDR3;MTERF4;SNU13;HSD17B10
Ribosomal Scanning And Start Codon Recognition R-HSA-72702	1/57	0.954377	0.979531	0.320665	0.0149739	EIF1AX
SUMOylation Of Chromatin Organization Proteins R-HSA-4551638	1/57	0.954377	0.979531	0.320665	0.0149739	PIAS2
Translation Initiation Complex Formation R-HSA-72649	1/57	0.954377	0.979531	0.320665	0.0149739	EIF1AX
mRNA Activation Upon Binding Of Cap-Binding Complex And eIFs, Subsequent Binding To 43S R-HSA-72662	1/58	0.956786	0.980785	0.315022	0.0139163	EIF1AX
HCMV Infection R-HSA-9609646	3/121	0.95708	0.980785	0.455908	0.0199999	H2BC5;CHMP2B;H2AC19
Class B/2 (Secretin Family Receptors) R-HSA-373080	2/92	0.958128	0.9811	0.39871	0.0170543	WNT11;CRHR1
Iron Uptake And Transport R-HSA-917937	1/59	0.959068	0.981303	0.309575	0.0129383	ATP6V1F
Immunoregulatory Interactions Between A Lymphoid And A non-Lymphoid Cell R-HSA-198933	3/123	0.960398	0.981905	0.448262	0.0181131	CD8B;TREM1;CD99
HCMV Early Events R-HSA-9609690	2/96	0.965077	0.985309	0.381663	0.0135673	H2BC5;H2AC19
RAB Geranylgeranylation R-HSA-8873719	1/62	0.965216	0.985309	0.294303	0.0104194	RAB1A
Gap-filling DNA Repair Synthesis And Ligation In TC-NER R-HSA-6782210	1/64	0.968793	0.987438	0.28493	0.00903361	POLR2L
Semaphorin Interactions R-HSA-373755	1/64	0.968793	0.987438	0.28493	0.00903361	RHOA
Chromatin Modifying Enzymes R-HSA-3247509	7/238	0.970051	0.987597	0.54221	0.0164869	H2AJ;H2BC5;TRRAP;PADI6;H2AC19;JADE1;SUDS3
Dual Incision In TC-NER R-HSA-6782135	1/65	0.970441	0.987597	0.280463	0.00841524	POLR2L
Potassium Channels R-HSA-1296071	2/102	0.973461	0.988529	0.358649	0.00964681	KCNJ5;ABCC9
Sensory Processing Of Sound By Inner Hair Cells Of Cochlea R-HSA-9662360	1/67	0.973481	0.988529	0.271935	0.00730881	SYN1
Metabolism Of RNA R-HSA-8953854	25/666	0.973596	0.988529	0.694516	0.0185841	PSMD12;DDX49;WDR3;DDX42;SNU13;SMG8;HSD17B10;PSMA8;THG1L;U2AF1L4;LSM10;RRP7A;PSMB5;MYC;MAGOH;SNRNP35;POLR2L;TRMT10A;CPSF7;MTERF4;THOC5;WDR33;NT5C3B;PSMA1;TRMT61B
Circadian Clock R-HSA-400253	1/69	0.976209	0.990422	0.263909	0.00635466	NOCT
Sensory Processing Of Sound R-HSA-9659379	1/75	0.982822	0.996074	0.242434	0.00420079	SYN1
Nonsense Mediated Decay (NMD) Enhanced By Exon Junction Complex (EJC) R-HSA-975957	2/112	0.9833	0.996074	0.325871	0.00548799	MAGOH;SMG8
Transcription-Coupled Nucleotide Excision Repair (TC-NER) R-HSA-6781827	1/77	0.984589	0.996074	0.236029	0.00366572	POLR2L
Selenoamino Acid Metabolism R-HSA-2408522	2/114	0.984789	0.996074	0.320018	0.00490507	HNMT;SEPHS2
Major Pathway Of rRNA Processing In Nucleolus And Cytosol R-HSA-6791226	4/179	0.986466	0.997009	0.409032	0.00557355	RRP7A;DDX49;WDR3;SNU13
rRNA Processing In Nucleus And Cytosol R-HSA-8868773	4/189	0.990907	0.998147	0.386716	0.00353238	RRP7A;DDX49;WDR3;SNU13
Selenocysteine Synthesis R-HSA-2408557	1/90	0.992393	0.998147	0.201414	0.00153806	SEPHS2
Viral mRNA Translation R-HSA-192823	1/90	0.992393	0.998147	0.201414	0.00153806	DNAJC3
Metabolism Of Nucleotides R-HSA-15869	1/95	0.994202	0.998147	0.19065	0.00110858	ADK
Influenza Viral RNA Transcription And Replication R-HSA-168273	2/137	0.994885	0.998147	0.265172	0.00135983	DNAJC3;POLR2L
Formation Of A Pool Of Free 40S Subunits R-HSA-72689	1/98	0.995074	0.998147	0.184724	0.000912183	EIF1AX
Keratinization R-HSA-6805567	4/208	0.995808	0.998147	0.350343	0.00147183	SPRR2G;SPINK6;KRTAP19-3;LCE3E
L13a-mediated Translational Silencing Of Ceruloplasmin Expression R-HSA-156827	1/108	0.997139	0.998147	0.167371	0.000479542	EIF1AX
Nucleotide Excision Repair R-HSA-5696398	1/108	0.997139	0.998147	0.167371	0.000479542	POLR2L
SRP-dependent Cotranslational Protein Targeting To Membrane R-HSA-1799339	1/108	0.997139	0.998147	0.167371	0.000479542	SRP68
GTP Hydrolysis And Joining Of 60S Ribosomal Subunit R-HSA-72706	1/109	0.99729	0.998147	0.165813	0.000449918	EIF1AX
Cellular Response To Starvation R-HSA-9711097	2/153	0.997637	0.998147	0.236873	0.000560493	RRAGC;ATP6V1F
Influenza Infection R-HSA-168255	2/157	0.998054	0.998147	0.230711	0.000449347	DNAJC3;POLR2L
Cap-dependent Translation Initiation R-HSA-72737	1/116	0.998147	0.998147	0.155662	0.000288632	EIF1AX

## Sheet: WikiPathway
Term	Overlap	P-value	Adjusted p-value	Odds Ratio	Combined Score	Genes
Tryptophan Metabolism WP465	10/33	4.78055e-06	0.00308345	7.88862	96.6431	GCDH;DDC;AOC1;AANAT;ALDH2;AADAT;CAT;KYAT1;DLD;ACAT1
Fatty Acid Beta Oxidation WP143	9/34	4.77117e-05	0.015387	6.52483	64.9242	GCDH;LIPE;ACSS2;LPL;ACSL4;ACSL3;DLD;CRAT;ACAT1
UDP Derived Sugars Synthesis In Fibroblasts WP5394	5/11	0.000141811	0.0304894	15.0612	133.458	GALE;GFPT1;PGM1;GCK;HK1
Integrated Cancer Pathway WP1971	9/44	0.000401452	0.0486452	4.65813	36.4285	CDKN2B;MMP1;MYC;CHEK1;CDK2;CDK1;BRCA1;CDC25A;JAK1
Spinal Cord Injury WP2431	16/119	0.000507053	0.0486452	2.82278	21.4161	ANXA1;GADD45A;BDNF;PLA2G5;RTN4;RHOA;CDC42;GJA1;PTPRZ1;COL4A1;PTPRA;MYC;LEP;CDK2;CDK1;TLR4
ADHD And Autism ASD Pathways WP5420	35/370	0.000604903	0.0486452	1.91015	14.1551	GABRB2;FAAH;DDC;MTRR;SHMT1;PIK3R1;HNMT;COMT;CACNG6;GRM5;CACNG8;AANAT;SPR;ALDH2;SCN3B;PRKACB;SCN3A;SCN1B;CACNG4;CBR1;AOC1;CNTN5;AADAT;CNTN6;OPRM1;RHOA;DLG1;GRIN3A;MTHFD1;DLG3;GNAQ;REN;KYAT1;PIK3C3;SCN2A
Male Infertility WP4673	18/145	0.000622186	0.0486452	2.5772	19.0256	NANOS1;PIWIL2;CRISP2;MTRR;GPX1;SHMT1;SIRPG;VCX;UBR2;YBX2;CLU;H3-4;MTHFD1;MSH5;DND1;CAT;EPPIN;BRDT
PPAR Signaling WP3942	11/68	0.000793521	0.0486452	3.4985	24.9759	FABP1;FABP2;MMP1;ACOX1;AQP7;ILK;LPL;ACSL4;ACSBG1;ACSL3;SORBS1
Vitamin D Receptor Pathway WP2877	21/186	0.00081968	0.0486452	2.31631	16.4611	S100G;SERPINB1;CDKN2B;LPGAT1;S100A2;GADD45A;VDR;HILPDA;SEMA3B;CCNC;TREM1;CST6;IL1RL1;TRPV6;BCL6;CCNE1;MYC;DND1;CDK2;PRKCQ;SULT2A1
miRNA Regulation Of DNA Damage Response WP1530	11/69	0.00089989	0.0486452	3.438	24.1115	CCNE1;GADD45A;MYC;CHEK1;CDK2;TLK2;CDK1;TNFRSF10B;BRCA1;ATRIP;CDC25A
DNA Damage Response WP707	11/69	0.00089989	0.0486452	3.438	24.1115	CCNE1;GADD45A;MYC;CHEK1;CDK2;TLK2;CDK1;TNFRSF10B;BRCA1;ATRIP;CDC25A
Glycogen Synthesis And Degradation WP500	8/40	0.000980446	0.0486452	4.52512	31.3478	PYGB;PPP2R1B;PPP2R2C;PHKB;PHKA1;GYG2;PGM1;HK1
ATM Signaling WP2516	8/40	0.000980446	0.0486452	4.52512	31.3478	ATF2;GADD45A;CCNE1;CHEK1;CDK2;CDK1;BRCA1;CDC25A
Disorders In Ketone Body Synthesis WP5175	3/5	0.00134327	0.0618863	27.0643	178.967	HMGCL;BDH1;ACAT1
TGF Beta Signaling Pathway WP366	16/132	0.0015707	0.0675401	2.50471	16.171	ATF2;CDKN2B;CITED1;MMP1;FN1;NEDD4L;NEDD9;PIK3R1;PIAS2;RHOA;PJA1;CDC42;KLF6;TERT;MYC;CDK1
Glyoxylate Metabolism WP5166	4/11	0.00187126	0.0732721	10.3173	64.8045	ALDH4A1;SLC26A1;HOGA1;AGXT
Fatty Acid Transporters WP5061	5/18	0.0019312	0.0732721	6.94877	43.4271	FABP1;FABP2;ACSL4;ACSBG1;ACSL3
Metastatic Brain Tumor WP2249	3/6	0.00258132	0.0924973	18.0419	107.52	CDC42;MYC;PIK3R1
Lipid Metabolism Pathway WP3965	6/29	0.00351285	0.119252	4.71509	26.6465	LIPE;ACSS2;HILPDA;ACSBG1;ABHD5;PRKACB
Fatty Acid Biosynthesis WP357	5/22	0.00498234	0.153596	5.31264	28.1668	PECR;ACSS2;ACSL4;ECHDC3;ACSL3
6Q16 Copy Number Variation WP5400	4/14	0.00500079	0.153596	7.22097	38.2579	NTRK2;BDNF;LEP;LEPR
Omega 3 Omega 6 Fatty Acid Synthesis WP4723	4/15	0.00653841	0.18336	6.56417	33.0182	ACOX1;ACSL4;ACSL3;PLA2G5
Glycine Metabolism Including IMDs WP5028	4/15	0.00653841	0.18336	6.56417	33.0182	SHMT1;LIAS;DLD;ISCU
Leucine Isoleucine And Valine Metabolism WP4686	5/24	0.00737061	0.198085	4.75291	23.338	PCCA;ACSF3;HSD17B10;DLD;ACAT1
Leptin Insulin Signaling Overlap WP3935	4/17	0.0104833	0.263691	5.55371	25.3137	SOCS3;LEP;LEPR;IRS2
Thyroid Stimulating Hormone TSH Signaling WP2032	8/58	0.0106294	0.263691	2.89332	13.1476	CCNE1;KCNIP3;GNAQ;GNA12;CDK2;GNAI3;PIK3R1;JAK1
Small Cell Lung Cancer WP4658	11/95	0.011197	0.267484	2.37059	10.6489	CDKN2B;COL4A2;COL4A1;CCNE1;GADD45A;LAMB2;MYC;CDK2;FN1;PIK3R1;BCL2L1
CAMKK2 Pathway WP4874	12/110	0.0130158	0.293865	2.21714	9.62592	MAP1LC3B;PFKFB3;CCNE1;WFS1;NEDD4L;CTSE;MID1;ERMAP;CDC25A;SLC38A5;GCK;HK1
mBDNF And proBDNF Regulation Of GABA Neurotransmission WP4829	6/38	0.0136681	0.293865	3.38736	14.5409	GABRB2;NTRK2;BDNF;PIK3R1;GABRE;RHOA
Parkinson 39 S Disease Pathway WP2371	6/38	0.0136681	0.293865	3.38736	14.5409	PRKN;DDC;CCNE1;UBA1;PARK7;UBE2J2
Overview Of Nanoparticle Effects WP3287	4/19	0.015705	0.326765	4.81271	19.9909	ITGAD;COL4A1;FN1;PTGS1
Ras Signaling WP4223	17/184	0.0174742	0.352214	1.84531	7.46801	NTRK2;FLT4;RRAS2;CALML3;PLAAT3;PIK3R1;PLA2G5;RHOA;CDC42;MAPK10;RASA3;SHOC2;RIN1;PRKACB;SOS2;LAT;BCL2L1
G Protein Signaling WP35	10/91	0.0212412	0.401256	2.23311	8.60153	AKAP12;GNAQ;AKAP9;GNA12;GNAI3;PRKCQ;PDE7A;PRKACB;PDE8A;RHOA
Ethanol Effects On Histone Modifications WP3996	5/31	0.0217666	0.401256	3.472	13.2887	HDAC5;ATF2;ACSS2;ALDH2;ALDH1A1
Glycosphingolipid Metabolism WP5292	4/21	0.0223154	0.401256	4.24606	16.1456	GALC;ARSA;NEU3;B4GALT6
Spina Bifida WP5150	3/12	0.0223957	0.401256	6.01206	22.8391	MTRR;MTHFD1;SHMT1
Thyroid Hormones And Peripheral Downstream Signaling Effects WP4746	10/93	0.0243318	0.411759	2.17907	8.09737	ATF2;TG;THRA;PAX8;NPR1;SECISBP2L;AQP7;TTF2;TTF1;MAP4K5
COVID 19 And Endothelial Cell Senescence WP5256	2/5	0.0248971	0.411759	12.0165	44.377	ANO6;TLR4
Disorders In Ketolysis WP5195	2/5	0.0248971	0.411759	12.0165	44.377	BDH1;ACAT1
miRNA Targets In ECM And Membrane Receptors WP2911	4/22	0.0261672	0.41794	4.00996	14.6093	COL4A2;LAMB2;COL4A1;FN1
Disorders Of Galactose Metabolism WP5173	3/13	0.0279967	0.41794	5.41057	19.3464	GALE;GYG2;PGM1
Dopamine Metabolism WP2436	3/13	0.0279967	0.41794	5.41057	19.3464	DDC;COMT;PRKACB
Androgen Receptor Network In Prostate Cancer WP2263	11/109	0.0285106	0.41794	2.03043	7.2232	MMP1;MYC;CHEK1;CDK2;CDK1;SPRY2;BRCA1;NDRG1;CRK;CDC25A;JAK1
5Q35 Copy Number Variation WP5380	11/109	0.0285106	0.41794	2.03043	7.2232	MAPK10;KIAA1191;MYC;SIMC1;GNAI3;TMED2;ABHD5;PIK3R1;BRCA1;FGF1;SNCB
Prostaglandin Synthesis And Regulation WP98	6/45	0.0296114	0.42443	2.77834	9.77863	CBR1;ANXA1;ANXA2;PTGER3;ANXA6;PTGS1
Apoptosis WP254	9/84	0.0323325	0.453357	2.1692	7.44399	MAPK10;MYC;CASP4;IRF7;TNFRSF10B;PIK3R1;TNFRSF21;MCL1;BCL2L1
Disorders Of Fructose Metabolism WP5178	3/14	0.0342683	0.470278	4.91844	16.5925	ALDH1A1;PGM1;HK1
Fluoroacetic Acid Toxicity WP4966	2/6	0.036055	0.484489	9.01189	29.9439	ACSS2;ALDH2
Microtubule Cytoskeleton Regulation WP2038	6/48	0.039118	0.506417	2.57948	8.36053	CDC42;NTRK2;PTPRA;GNAQ;CDK1;MAPT
Biosynth Of Tetrahydrobiopterin And Phenylalanine Catabolism WP4156	3/15	0.0412008	0.506417	4.50833	14.3784	AANAT;SPR;COMT
miRNAs Involved In DNA Damage Response WP1545	3/15	0.0412008	0.506417	4.50833	14.3784	CCNE1;MYC;CDC25A
Biogenic Amine Synthesis WP550	3/15	0.0412008	0.506417	4.50833	14.3784	DDC;AANAT;COMT
Cancer Pathways WP5434	36/507	0.0425521	0.506417	1.38857	4.38376	NOTCH2;FLT4;PTGER3;MGST1;GNAI3;CALML3;PIK3R1;FGF1;WNT11;TERT;MYC;GNA12;SKP2;PRKACB;APPL1;JAK1;EGLN1;CDKN2B;FZD5;GADD45A;MMP1;LAMB2;PLEKHG5;FN1;VEGFB;RHOA;MAPK10;PAX8;COL4A2;COL4A1;CCNE1;GNAQ;CDK2;SOS2;CRK;BCL2L1
Hepatitis C And Hepatocellular Carcinoma WP3646	6/49	0.0426708	0.506417	2.51936	7.94666	COL4A2;MMP1;MYC;BRCA1;JAK1;BCL2L1
Insulin Signaling WP481	14/160	0.0431829	0.506417	1.73516	5.45243	ARF1;CBLC;IRS2;PIK3R1;SORBS1;MAPK10;LIPE;SOCS3;PRKCQ;PIK3C3;MAP4K5;SOS2;CRK;MAP4K3
COVID 19 Thrombosis And Anticoagulation WP4927	2/7	0.0487406	0.507511	7.20913	21.7805	FGB;FGA
Molybdenum Cofactor Moco Biosynthesis WP4507	2/7	0.0487406	0.507511	7.20913	21.7805	MTARC2;MOCS1
Airway Smooth Muscle Cell Contraction WP4962	3/16	0.0487796	0.507511	4.16132	12.569	RYR1;GNAQ;RHOA
ID Signaling WP53	3/16	0.0487796	0.507511	4.16132	12.569	PAX8;CCNE1;CDK2
Amino Acid Metabolism WP3925	9/91	0.0499863	0.507511	1.98328	5.94193	MPST;HMGCL;DDC;G6PC2;ALDH1A1;HNMT;GCLM;DLD;ADH5
G1 To S Cell Cycle Control WP45	7/64	0.0504675	0.507511	2.21781	6.62331	CDKN2B;CCNE1;GADD45A;MYC;CDK2;CDK1;CDC25A
Metabolic Epileptic Disorders WP5355	9/92	0.0529398	0.507511	1.95929	5.75755	GCDH;AADAT;SHMT1;DLD;MOCS1;SLC7A2;GCK;HK1;ACAT1
Regulation Of Actin Cytoskeleton WP51	13/150	0.0532937	0.507511	1.71624	5.03191	CHRM2;FN1;RRAS2;PIK3R1;FGF1;BAIAP2;RHOA;VAV1;CDC42;GNA12;PIK3C3;SOS2;CRK
Degradation Pathway Of Sphingolipids Including Diseases WP4153	3/17	0.056986	0.507511	3.86388	11.0698	GALC;ARSA;NEU3
Involvement Of Secretase In Neurodegenerative Diseases WP5372	3/17	0.056986	0.507511	3.86388	11.0698	NTRK2;BDNF;MAPT
Mitochondrial Long Chain Fatty Acid Beta Oxidation WP368	3/17	0.056986	0.507511	3.86388	11.0698	PECR;ACSL4;ACSL3
miR 509 3P Alteration Of YAP1 ECM Axis WP3967	3/17	0.056986	0.507511	3.86388	11.0698	FN1;GPC6;TEAD3
Sphingolipid Metabolism In Senescence WP5121	4/28	0.0572303	0.507511	3.00651	8.60065	ASAH1;SPTLC1;TERT;CDK2
Dravet Syndrome WP5200	4/28	0.0572303	0.507511	3.00651	8.60065	SCN3B;SCN2A;SCN3A;SCN1B
Microglia Pathogen Phagocytosis Pathway WP3937	5/40	0.0574119	0.507511	2.57797	7.36656	PIK3C3;PIK3R1;TREM1;VAV1;LAT
PDGF Pathway WP2526	5/40	0.0574119	0.507511	2.57797	7.36656	CDC42;PIK3R1;RHOA;VAV1;JAK1
DNA Damage Response Only ATM Dependent WP710	10/109	0.0613442	0.507511	1.82535	5.09501	CDC42;MAPK10;WNT11;BCL6;MYC;CAT;PIK3C3;PIK3R1;SOS2;RHOA
MAPK Signaling WP382	19/246	0.0614906	0.507511	1.51535	4.22612	ATF2;NTRK2;GADD45A;BDNF;RRAS2;FGF1;CACNA1G;CDC42;CACNG6;MAPK10;CACNG8;MYC;GNA12;MAPT;PRKACB;SOS2;CRK;MAP4K3;CACNG4
AMP Activated Protein Kinase Signaling WP1403	7/67	0.0618628	0.507511	2.10658	5.86227	LIPE;PFKFB3;LEP;LEPR;PIK3C3;PIK3R1;PRKACB
Biosynthesis And Turnover Of 1 Deoxy Sphingoid Bases WP5179	2/8	0.0627626	0.507511	6.00729	16.6306	ASAH1;SPTLC1
EPAC1 And PKA Reduction Of Retinal Inflammation WP5440	2/8	0.0627626	0.507511	6.00729	16.6306	NEK7;PRKACB
Cerebral Organic Acidurias Including Diseases WP4519	2/8	0.0627626	0.507511	6.00729	16.6306	GCDH;ADHFE1
Ketogenesis And Ketolysis WP4742	2/8	0.0627626	0.507511	6.00729	16.6306	BDH1;ACAT1
Interferon Type I Signaling WP585	6/54	0.0634063	0.507511	2.25633	6.22339	SOCS3;IRS2;PIK3R1;CRK;VAV1;JAK1
Notch Signaling WP61	6/54	0.0634063	0.507511	2.25633	6.22339	NOTCH2;SPEN;TLE1;FHL1;DTX1;PIK3R1
RAS And Bradykinin Pathways In COVID 19 WP4969	4/29	0.063734	0.507511	2.8861	7.94554	NPR1;VDR;REN;RHOA
Circadian Rhythm Genes WP3594	16/201	0.0656548	0.516431	1.56476	4.26139	DDC;EGR3;CIPC;GFPT1;DYRK1A;SOX14;CARTPT;MAPK10;PROKR2;AANAT;NAGLU;PSPC1;GNAQ;NOCT;LEP;DRD3
Glioblastoma Signaling WP2261	8/82	0.0665443	0.517122	1.95246	5.29096	ERRFI1;CDKN2B;CCNE1;CDK2;SPRY2;PRKCQ;BRCA1;PIK3R1
Folate Metabolism WP176	7/69	0.0702642	0.518909	2.03841	5.41298	FGB;FGA;MTRR;GPX1;MTHFD1;SHMT1;CAT
Sphingolipid Pathway WP1422	4/30	0.0706071	0.518909	2.77495	7.35535	ASAH1;SPTLC1;B4GALT6;CERT1
Hippo Signaling Regulation WP4540	9/98	0.0730346	0.518909	1.82662	4.77993	CDC42;NTRK2;GNAQ;FLT4;GNAI3;PRKCQ;PRKACB;RHOA;TEAD3
IL6 Signaling WP364	5/43	0.0739977	0.518909	2.37407	6.18142	SOCS3;PIK3R1;VAV1;JAK1;BCL2L1
Mitochondrial Fatty Acid Oxidation Disorders WP5123	3/19	0.0751902	0.518909	3.38054	8.74793	PECR;ACSL4;ACSL3
KCNQ2 Related Epilepsies WP5360	3/19	0.0751902	0.518909	3.38054	8.74793	CSNK2A1;ANK3;SCN1B
Folate Alcohol And Cancer Pathway Hypotheses WP1589	2/9	0.0779452	0.518909	5.14884	13.1385	ALDH1A1;ADH5
Acetaminophen In Analgesia And Antipyresis WP5444	2/9	0.0779452	0.518909	5.14884	13.1385	FAAH;PTGS1
Mitochondrial Beta Oxidation WP5241	2/9	0.0779452	0.518909	5.14884	13.1385	ACSL3;HSD17B10
Methylation Pathways WP704	2/9	0.0779452	0.518909	5.14884	13.1385	HNMT;COMT
Leptin Signaling WP2034	7/71	0.079312	0.518909	1.9745	5.00411	CDC42;SOCS3;LEP;LEPR;PIK3R1;RHOA;JAK1
Gastrin Signaling WP4659	10/115	0.0815136	0.518909	1.72049	4.31326	CDC42;ATF2;ANXA2;MYC;GNAQ;PRKCQ;PIK3R1;CRK;RHOA;BCL2L1
Wnt Signaling And Pluripotency WP399	9/101	0.0846338	0.518909	1.76677	4.36291	MAPK10;WNT11;PPP2R1B;FZD5;PPP2R2C;MYC;PRKCQ;RHOA;NKD1
PI3K Akt Signaling WP4172	24/338	0.084817	0.518909	1.38404	3.41479	CHRM2;ATF2;NTRK2;BDNF;LAMB2;FLT4;FN1;VEGFB;PIK3R1;BRCA1;FGF1;G6PC2;PPP2R1B;COL4A2;PPP2R2C;COL4A1;CCNE1;MYC;CDK2;TLR4;SOS2;JAK1;MCL1;BCL2L1
Autophagy In Pancreatic Ductal Adenocarcinoma WP5331	3/20	0.085136	0.518909	3.18151	7.83767	PRKN;MAP1LC3B;SHOC2
Imatinib And Chronic Myeloid Leukemia WP3640	3/20	0.085136	0.518909	3.18151	7.83767	GADD45A;MYC;SKP2
13Q12 12 Copy Number Variation WP5406	4/32	0.0854328	0.518909	2.57647	6.33818	CDC42;SGCB;RTN4;RHOA
15Q25 Copy Number Variation WP5408	5/45	0.086351	0.518909	2.25513	5.52357	RYR1;GRM5;BTBD1;AP3D1;PDE8A
TROP2 Regulatory Signaling WP5300	5/45	0.086351	0.518909	2.25513	5.52357	CCNE1;CHEK1;CDK2;FN1;PIK3R1
Retinoblastoma Gene In Cancer WP2446	8/87	0.0872643	0.518909	1.82841	4.45914	CCNE1;MYC;CHEK1;CDK2;CDK1;ZNF655;SKP2;CDC25A
Androgen Receptor Signaling WP138	8/87	0.0872643	0.518909	1.82841	4.45914	CDC42;CCNE1;RNF6;BRCA1;PARK7;PIK3R1;RHOA;PIAS2
Angiopoietin Like Protein 8 Regulatory Pathway WP3915	11/132	0.0885617	0.518909	1.64247	3.98144	MAPK10;THRA;CBLC;LPL;IRS2;PIK3C3;PIK3R1;MAP4K5;SOS2;CRK;MAP4K3
Type I Collagen Synthesis Osteogenesis Imperfecta WP4786	4/33	0.093368	0.518909	2.48749	5.89836	MBTPS1;LOX;SERPINF1;PLOD2
Mitochondrial Immune Response To SARS CoV 2 WP5038	4/33	0.093368	0.518909	2.48749	5.89836	TOMM70;NLRX1;IRF7;REN
Cardiomyocyte Signaling Converging On Titin WP5344	4/33	0.093368	0.518909	2.48749	5.89836	NPR1;FHL1;PRKACB;CRYAB
Oxidative Stress Response WP408	4/33	0.093368	0.518909	2.48749	5.89836	MAPK10;GPX1;CAT;MGST1
Alpha 6 Beta 4 Signaling WP244	4/33	0.093368	0.518909	2.48749	5.89836	LAMB2;IRS2;PIK3R1;RHOA
Arrhythmogenic Right Ventricular Cardiomyopathy WP2118	7/74	0.0940892	0.518909	1.88579	4.45709	CACNG6;GJA1;CACNG8;SGCB;ACTN2;DSC2;CACNG4
Prolactin Signaling WP2037	7/74	0.0940892	0.518909	1.88579	4.45709	SOCS3;MYC;IRS2;PIK3R1;YWHAG;VAV1;JAK1
Mammary Gland Development Pathway Involution Stage 4 Of 4 WP2815	2/10	0.0941277	0.518909	4.505	10.6458	SOCS3;MYC
Arsenic Metabolism And Reactive Oxygen Species Generation WP5233	2/10	0.0941277	0.518909	4.505	10.6458	AS3MT;CAT
Neurotransmitter Disorders WP4220	2/10	0.0941277	0.518909	4.505	10.6458	DDC;COMT
Trans Sulfuration Pathway WP2333	2/10	0.0941277	0.518909	4.505	10.6458	MPST;GCLM
Leptin And Adiponectin WP3934	2/10	0.0941277	0.518909	4.505	10.6458	LEP;LEPR
T Cell Receptor Signaling WP69	7/75	0.0993329	0.535943	1.85796	4.29055	CDC42;ATF2;PRKCQ;PIK3R1;CRK;VAV1;LAT
Cholesterol Metab With Bloch And Kandutsch Russell Pathways WP4718	5/47	0.0997104	0.535943	2.14751	4.95106	ACSL4;DHCR24;ACSL3;CYP46A1;LSS
ATM Signaling In Development And Disease WP3878	5/47	0.0997104	0.535943	2.14751	4.95106	ATF2;DCLRE1C;CHEK1;CDK2;CDC25A
Cell Cycle WP179	10/120	0.101096	0.53735	1.64185	3.76261	CDKN2B;CCNE1;GADD45A;MYC;CHEK1;CDK2;CDK1;SKP2;CDC25A;YWHAG
Leukocyte Intrinsic Hippo Pathway Functions WP4542	4/34	0.101638	0.53735	2.40445	5.49738	LPL;NDRG1;RHOA;TEAD3
Hippo YAP Signaling WP4537	3/22	0.10657	0.552384	2.84632	6.37276	NDRG1;MAP4K3;TEAD3
Rett Syndrome WP4312	5/48	0.106756	0.552384	2.09746	4.69246	HDAC5;CDKL5;TRRAP;SCN2A;CRK
Brain Derived Neurotrophic Factor BDNF Signaling WP2380	11/137	0.107722	0.552384	1.57687	3.51359	CDC42;MAPK10;NTRK2;DLG1;CDKL5;CSNK2A1;BDNF;IRS2;PIK3R1;MAPT;SYN1
IDO Metabolic Pathway WP5414	2/11	0.111163	0.552384	4.00423	8.79633	AADAT;KYAT1
Nucleotide GPCRs WP80	2/11	0.111163	0.552384	4.00423	8.79633	P2RY6;P2RY2
ATR Signaling WP3875	2/11	0.111163	0.552384	4.00423	8.79633	CHEK1;ATRIP
Corticotropin Releasing Hormone Signaling WP2355	8/92	0.111333	0.552384	1.71912	3.77385	LINC02210-CRHR1;GJA1;GNAQ;PRKCQ;TLR4;RHOA;CRHR1;SULT2A1
B Cell Receptor Signaling WP23	8/92	0.111333	0.552384	1.71912	3.77385	CDC42;ATF2;BCL6;MYC;PIK3R1;CRK;VAV1;GTF2I
Endometrial Cancer WP4155	6/63	0.113252	0.557616	1.89916	4.13663	GADD45A;MYC;ILK;PIK3R1;FGF1;SOS2
Regulatory Circuits Of STAT3 Signaling WP4538	7/78	0.115997	0.566806	1.77917	3.83267	MAPK10;CNTFR;SOCS3;MPL;MAPK15;IL27RA;JAK1
Eicosanoid Synthesis WP167	3/23	0.117997	0.569215	2.70386	5.77841	CBR1;PLA2G5;PTGS1
Enterocyte Cholesterol Metabolism WP5333	4/36	0.119138	0.569215	2.25393	4.79518	FABP2;SAR1B;DHCR24;LSS
Wnt Signaling In Kidney Disease WP4150	4/36	0.119138	0.569215	2.25393	4.79518	MAPK10;WNT11;FZD5;RHOA
IL4 Signaling WP395	5/50	0.121552	0.576477	2.00403	4.22332	ATF2;SOCS3;IRS2;PIK3R1;JAK1
Pathways Affected In Adenoid Cystic Carcinoma WP3651	6/65	0.126423	0.594012	1.83459	3.79416	SRCAP;CNTN6;MYC;CHEK1;MAGI2;BRCA1
Photodynamic Therapy Induced HIF 1 Survival Signaling WP3614	4/37	0.128343	0.594012	2.18552	4.48697	EGLN1;HK1;MCL1;BCL2L1
IL2 Signaling WP49	4/37	0.128343	0.594012	2.18552	4.48697	SOCS3;PIK3R1;MAPT;JAK1
Regulation Of Apoptosis By Parathyroid Hormone Related Protein WP3872	3/24	0.129854	0.594012	2.57497	5.2564	MYC;MCL1;BCL2L1
Kynurenine Pathway And Links To Cell Senescence WP5044	3/24	0.129854	0.594012	2.57497	5.2564	AADAT;CAT;TLR4
Physico Chemical Features And Toxicity Associated Pathways WP3680	6/66	0.133275	0.600297	1.80392	3.63551	GPX1;WNT11;FZD5;MYC;FN1;RHOA
EGF EGFR Signaling WP437	12/159	0.13382	0.600297	1.47425	2.96509	CDC42;ERRFI1;GJA1;CBLC;SPRY2;STAMBP;PIK3R1;RIN1;SOS2;CRK;VAV1;JAK1
DNA IR Damage And Cellular Response Via ATR WP4016	7/81	0.13402	0.600297	1.70677	3.43022	BCL6;CHEK1;CDK2;CDK1;BRCA1;ATRIP;MCPH1
Senescence Associated Secretory Phenotype SASP WP3391	9/113	0.14129	0.628498	1.56192	3.05658	H2AJ;CDKN2B;H2BC5;H2BC6;H4C13;CDK2;H2AC19;H3C1;H2AC18
ncRNAs Involved In STAT3 Signaling In Hepatocellular Carcinoma WP4337	2/13	0.147265	0.633241	3.27584	6.27494	IL11;JAK1
Mammary Gland Development Pathway Puberty Stage 2 Of 4 WP2814	2/13	0.147265	0.633241	3.27584	6.27494	MYC;FN1
Cell Type Dependent Selectivity Of CCK2R Signaling WP3679	2/13	0.147265	0.633241	3.27584	6.27494	RYR1;GNAQ
Mevalonate Arm Of Cholesterol Biosynthesis Pathway WP4190	2/13	0.147265	0.633241	3.27584	6.27494	HMGCL;ACAT1
Genes Targeted By miRNAs In Adipocytes WP1992	2/13	0.147265	0.633241	3.27584	6.27494	KCNE1;GJA1
SARS CoV 2 Mt Chronic Ox Stress And Endothelial Dysfunction WP5183	3/26	0.154729	0.644357	2.35081	4.38679	TOMM70;NLRX1;REN
Sphingolipid Metabolism Integrated Pathway WP4726	3/26	0.154729	0.644357	2.35081	4.38679	ASAH1;SPTLC1;SMPD1
PPAR Alpha Pathway WP2878	3/26	0.154729	0.644357	2.35081	4.38679	FABP1;MYC;CDK1
Glucuronidation WP698	3/26	0.154729	0.644357	2.35081	4.38679	UGT1A1;PGM1;HK1
Urotensin II Mediated Signaling WP5158	6/69	0.154845	0.644357	1.71774	3.20415	HDAC5;CCNE1;CDK2;FN1;CDK1;RHOA
Oxidative Damage Response WP3941	4/40	0.157617	0.651685	2.00307	3.70085	CDC42;MAPK10;BAG4;GADD45A
ncRNAs In Wnt Signaling In Hepatocellular Carcinoma WP4336	7/85	0.16004	0.653328	1.6189	2.96636	WNT11;CSNK2A1;FZD5;MYC;SERPINF1;SENP2;NKD1
Acute Viral Myocarditis WP4298	7/85	0.16004	0.653328	1.6189	2.96636	SGCB;ILK;PIK3R1;TLR4;EIF4G2;JAK1;BCL2L1
DNA IR Double Strand Breaks And Cellular Response Via ATM WP3959	5/55	0.162339	0.658546	1.80315	3.27825	ATF2;DCLRE1C;CHEK1;BRCA1;MCPH1
Serotonin And Anxiety Related Events WP3944	2/14	0.166098	0.665424	3.0027	5.39037	LINC02210-CRHR1;CRHR1
Omega 9 Fatty Acid Synthesis WP4724	2/14	0.166098	0.665424	3.0027	5.39037	ACSL4;ACSL3
Sphingolipid Metabolism Overview WP4725	3/27	0.167683	0.667626	2.25274	4.02267	ASAH1;SPTLC1;SMPD1
Calcium Regulation In Cardiac Cells WP536	11/151	0.172906	0.6842	1.41813	2.48883	CHRM2;RYR1;KCNJ5;GJA1;RGS3;GNAQ;ANXA6;GNAI3;PRKCQ;PRKACB;YWHAG
Cholesterol Metabolism WP5304	6/72	0.177838	0.699422	1.6394	2.83106	LRPAP1;FABP2;SAR1B;LPL;DHCR24;LSS
Neurogenesis Regulation In The Olfactory Epithelium WP5265	5/57	0.180014	0.703692	1.73361	2.97266	NTRK2;BDNF;MYC;MAPT;RTN4
Mammary Gland Development Pathway Embryonic Development Stg 1/4 WP2813	2/15	0.185313	0.704942	2.77157	4.67206	TERT;MYC
Iron Sulfur Cluster Biogenesis WP5152	2/15	0.185313	0.704942	2.77157	4.67206	ABCB7;ISCU
Pancreatic Adenocarcinoma Pathway WP4263	7/89	0.188144	0.704942	1.5396	2.57199	CDC42;MAPK10;GADD45A;PIK3R1;RHOA;JAK1;BCL2L1
Breast Cancer Pathway WP4262	11/154	0.188925	0.704942	1.38816	2.31324	NOTCH2;WNT11;CSNK2A1;FZD5;GADD45A;MYC;FLT4;PIK3R1;BRCA1;FGF1;SOS2
Cholesterol Biosynthesis Pathway In Hepatocytes WP5329	4/43	0.189078	0.704942	1.8487	3.07918	DHCR24;ACSL3;CYP46A1;LSS
Fibrin Complement Receptor 3 Signaling WP4136	4/43	0.189078	0.704942	1.8487	3.07918	FGB;FGA;TLR4;RHOA
Neural Crest Cell Migration In Cancer WP4565	4/43	0.189078	0.704942	1.8487	3.07918	NTRK2;ARF1;BDNF;RHOA
Vitamin A And Carotenoid Metabolism WP716	4/43	0.189078	0.704942	1.8487	3.07918	RBP4;ALDH1A1;LPL;RDH5
Cannabinoid Receptor Signaling WP3869	3/29	0.194461	0.709907	2.07923	3.40479	MAPK10;FAAH;PRKACB
One Carbon Metabolism WP241	3/29	0.194461	0.709907	2.07923	3.40479	MTRR;MTHFD1;SHMT1
Markers Of Kidney Cell Lineage WP5236	5/59	0.198366	0.709907	1.66923	2.70021	EGLN1;CITED1;RSPO3;REN;PBX1
Smith Magenis And Potocki Lupski Syndrome Copy Number Variation WP5381	11/156	0.199966	0.709907	1.36887	2.20334	PRKN;MAEA;GID4;MPRIP;BCL6;MYC;SHMT1;CDK1;C9ORF72;TLR4;RHOA
Renin Angiotensin Aldosterone System RAAS WP4756	4/44	0.199981	0.709907	1.80238	2.901	ATF2;GNAQ;CALML3;REN
IL11 Signaling WP2332	4/44	0.199981	0.709907	1.80238	2.901	SOCS3;IL11;PIK3R1;JAK1
P53 Transcriptional Gene Network WP4963	7/91	0.202901	0.709907	1.50279	2.397	ALDH4A1;GPX1;CCNE1;GADD45A;CDK2;TNFRSF10B;CDC25A
MAPK Pathway In Congenital Thyroid Cancer WP4928	2/16	0.204818	0.709907	2.57347	4.08058	MYC;SOS2
Sudden Infant Death Syndrome SIDS Susceptibility Pathways WP706	11/157	0.205591	0.709907	1.35942	2.15042	CHRM2;NTRK2;GJA1;DDC;BDNF;HTR3A;SCN3B;PRKACB;PBX1;YWHAG;GCK
Development Of Ureteric Derived Collecting System WP5053	5/60	0.207773	0.709907	1.63879	2.57505	WNT11;GPC3;ILK;FREM1;PBX1
GPR143 In Melanocytes And Retinal Pigment Epithelium Cells WP4941	3/30	0.208222	0.709907	2.00212	3.14162	SERPINF1;GNAQ;PRKACB
Familial Partial Lipodystrophy WP5102	3/30	0.208222	0.709907	2.00212	3.14162	LIPE;FNTA;LPL
Matrix Metalloproteinases WP129	3/30	0.208222	0.709907	2.00212	3.14162	MMP16;MMP26;MMP1
NRF2 Pathway WP2884	10/141	0.20938	0.709907	1.37712	2.15327	CBR1;UGT1A1;ABCC5;SLC2A12;SLC5A11;SLC39A10;SLC5A12;SLC5A10;SLC6A20;GCLM
Alzheimer 39 S Disease And miRNA Effects WP2059	17/261	0.215713	0.709907	1.2578	1.92922	PSMD12;CSNK2A1;FZD5;LPL;CALML3;IRS2;PIK3R1;HSD17B10;RTN4;PSMA8;MAPK10;PSMB5;WNT11;PSMA1;GNAQ;PIK3C3;MAPT
Alzheimer 39 S Disease WP5124	17/261	0.215713	0.709907	1.2578	1.92922	PSMD12;CSNK2A1;FZD5;LPL;CALML3;IRS2;PIK3R1;HSD17B10;RTN4;PSMA8;MAPK10;PSMB5;WNT11;PSMA1;GNAQ;PIK3C3;MAPT
lncRNA In Canonical Wnt Signaling And Colorectal Cancer WP4258	7/93	0.218086	0.709907	1.46768	2.23509	WNT11;CSNK2A1;FZD5;MYC;SERPINF1;SENP2;NKD1
Nuclear Receptors Meta Pathway WP2882	20/314	0.220005	0.709907	1.22838	1.85989	IL11;CBR1;UGT1A1;VDR;ABCC5;SLC2A12;MGST1;SLC5A11;SLC39A10;SLC5A12;IRS2;SLC5A10;SLC6A20;FABP1;EPB41L4B;ACOX1;MYC;CDK1;GCLM;SULT2A1
Type I Interferon Induction And Signaling SARS CoV 2 Infection WP4868	3/31	0.222191	0.709907	1.93051	2.90391	IRF7;TLR4;JAK1
Prostaglandin And Leukotriene Metabolism In Senescence WP5122	3/31	0.222191	0.709907	1.93051	2.90391	GNAQ;PTGER3;PTGS1
Eicosanoid Metabolism Via Cyclooxygenases COX WP4719	3/31	0.222191	0.709907	1.93051	2.90391	ACOX1;PLA2G5;PTGS1
16P11 2 Distal Deletion Syndrome WP4950	3/31	0.222191	0.709907	1.93051	2.90391	MPL;SPNS1;LAT
Gastric Cancer Network 2 WP2363	3/31	0.222191	0.709907	1.93051	2.90391	CHTF8;MYC;FAM91A1
Chronic Hyperglycemia Impairment Of Neuron Function WP5283	4/46	0.22232	0.709907	1.71637	2.58081	MMP16;BDNF;MMP1;PRKCQ
Aryl Hydrocarbon Receptor Pathway WP2586	4/46	0.22232	0.709907	1.71637	2.58081	KLF6;MYC;CDK2;LPL
Metabolic Pathway Of LDL HDL And TG Including Diseases WP4522	2/17	0.224529	0.709907	2.40178	3.58766	ANXA2;LPL
ERK Pathway In Huntington 39 S Disease WP3853	2/17	0.224529	0.709907	2.40178	3.58766	NTRK2;BDNF
Drug Induction Of Bile Acid Pathway WP2289	2/17	0.224529	0.709907	2.40178	3.58766	VDR;SULT2A1
Glycosaminoglycan Degradation WP4815	2/17	0.224529	0.709907	2.40178	3.58766	NAGLU;ARSB
Fatty Acid Omega Oxidation WP206	2/17	0.224529	0.709907	2.40178	3.58766	ALDH2;ALDH1A1
IL9 Signaling WP22	2/17	0.224529	0.709907	2.40178	3.58766	PIK3R1;JAK1
Mechanoreg And Pathology Of YAP TAZ Hippo And Non Hippo Mechs WP4534	4/47	0.233725	0.715827	1.67637	2.43679	MAPK10;MAP4K5;MAP4K3;TEAD3
Hair Follicle Development Organogenesis Part 2 Of 3 WP2839	3/32	0.236339	0.715827	1.86384	2.68857	MYC;INHBA;FGF1
Metabolic Pathways Of Fibroblasts WP5312	3/32	0.236339	0.715827	1.86384	2.68857	PGM1;GCK;RHOA
TCA Cycle Nutrient Use And Invasiveness Of Ovarian Cancer WP2868	1/5	0.236972	0.715827	4.50166	6.48155	JAK1
Conversion Of Angiotensinogen To Angiotensin II WP4818	1/5	0.236972	0.715827	4.50166	6.48155	REN
GLP 1 Secretion From Intestine To Portal Vein WP5446	1/5	0.236972	0.715827	4.50166	6.48155	GNAQ
Sebaleic Acid Formation And Metabolism WP5315	1/5	0.236972	0.715827	4.50166	6.48155	CYP4F3
Proline And Hydroxyproline Pathways WP5026	1/5	0.236972	0.715827	4.50166	6.48155	ALDH4A1
Sulindac Metabolic Pathway WP2542	1/5	0.236972	0.715827	4.50166	6.48155	MSRB2
Cholesterol Synthesis Disorders WP5193	2/18	0.24437	0.715827	2.25155	3.17259	DHCR24;LSS
Proteoglycan Biosynthesis WP4784	2/18	0.24437	0.715827	2.25155	3.17259	EXT2;BPNT2
Estrogen Metabolism WP697	2/18	0.24437	0.715827	2.25155	3.17259	UGT1A1;COMT
Nephrogenesis WP5052	2/18	0.24437	0.715827	2.25155	3.17259	NOTCH2;RSPO3
Wnt Signaling WP428	8/113	0.244692	0.715827	1.37376	1.93392	WNT11;CSNK2A1;FZD5;MYC;SERPINF1;SENP2;RHOA;NKD1
Exercise Induced Circadian Regulation WP410	4/48	0.245268	0.715827	1.63818	2.30231	RBPMS;STBD1;QKI;EIF4G2
Omega 6 Fatty Acids In Senescence WP5424	4/48	0.245268	0.715827	1.63818	2.30231	CBR1;GPX1;ALDH1A1;PTGS1
Pancreatic Cancer Subtypes WP5390	4/48	0.245268	0.715827	1.63818	2.30231	S100A2;LY6D;CTSE;CST6
Focal Adhesion WP306	13/199	0.25056	0.718489	1.26082	1.74505	LAMB2;FN1;VEGFB;ILK;PIK3R1;RHOA;VAV1;CDC42;MAPK10;COL4A2;COL4A1;TLN2;CRK
FBXL10 Enhancement Of MAP ERK Signaling In DLBCL WP4553	3/33	0.250636	0.718489	1.80162	2.493	H2AJ;BCL6;H3C1
Monoamine GPCRs WP58	3/33	0.250636	0.718489	1.80162	2.493	CHRM2;HTR5A;DRD3
MAPK Cascade WP422	3/33	0.250636	0.718489	1.80162	2.493	MAPK10;RASA3;SOS2
Interleukin 1 IL 1 Structural Pathway WP2637	4/49	0.256933	0.727491	1.60169	2.17661	MAPK10;ATF2;MYC;IRF7
IL3 Signaling WP286	4/49	0.256933	0.727491	1.60169	2.17661	PIK3R1;VAV1;JAK1;BCL2L1
Disorders Of Folate Metabolism And Transport WP4259	2/19	0.264274	0.727491	2.11899	2.81989	MTHFD1;SHMT1
LTF Danger Signal Response Pathway WP4478	2/19	0.264274	0.727491	2.11899	2.81989	TREM1;TLR4
Farnesoid X Receptor Pathway WP2879	2/19	0.264274	0.727491	2.11899	2.81989	IRS2;SULT2A1
Glutathione Metabolism WP100	2/19	0.264274	0.727491	2.11899	2.81989	GPX1;GCLM
TP53 Network WP1742	2/19	0.264274	0.727491	2.11899	2.81989	GADD45A;MYC
Prostaglandin And Leukotriene Metabolism In Senescence WP5321	3/34	0.265055	0.727491	1.74341	2.31493	GNAQ;PTGER3;PTGS1
Cohesin Complex Cornelia De Lange Syndrome WP5117	3/34	0.265055	0.727491	1.74341	2.31493	SGO2;PPP2R1B;CDK1
Purinergic Signaling WP4900	3/34	0.265055	0.727491	1.74341	2.31493	P2RY6;P2RY2;GNAI3
Synaptic Signaling Associated With Autism Spectrum Disorder WP4539	4/50	0.268705	0.731286	1.56679	2.05899	NTRK2;GRIN3A;BDNF;PIK3R1
Photodynamic Therapy Induced AP 1 Survival Signaling WP3611	4/50	0.268705	0.731286	1.56679	2.05899	ATF2;CCNE1;MCL1;BCL2L1
lncRNA Mediated Mechanisms Of Therapeutic Resistance WP3672	1/6	0.277155	0.73533	3.60114	4.6209	BCL2L1
Let 7 Inhibition Of ES Cell Reprogramming WP3299	1/6	0.277155	0.73533	3.60114	4.6209	MYC
Benzene Metabolism WP3891	1/6	0.277155	0.73533	3.60114	4.6209	EPHX1
Fatty Acids And Lipoproteins Transport In Hepatocytes WP5323	3/35	0.27957	0.73533	1.68884	2.15243	FABP1;FABP2;ACSL3
P38 MAPK Signaling WP400	3/35	0.27957	0.73533	1.68884	2.15243	CDC42;ATF2;MYC
EGFR Tyrosine Kinase Inhibitor Resistance WP4806	6/84	0.280953	0.73533	1.38631	1.76001	MYC;RRAS2;PIK3R1;SOS2;JAK1;BCL2L1
Polycystic Kidney Disease Pathway WP2571	6/84	0.280953	0.73533	1.38631	1.76001	WNT11;FZD5;MYC;GNAQ;GNAI3;VEGFB
Osteoblast Differentiation And Related Diseases WP4787	8/118	0.282322	0.73533	1.31097	1.65799	NOTCH2;MAPK10;WNT11;FZD5;PRKCQ;PIK3C3;PIK3R1;FGF1
Integrin Mediated Cell Adhesion WP185	7/101	0.282366	0.73533	1.34221	1.69729	CDC42;MAPK10;ITGAD;CAPN7;ILK;SORBS1;CRK
Hematopoietic SC Gene Regulation By GABP Alpha Beta Complex WP3657	2/20	0.284178	0.73533	2.00116	2.51777	MCL1;BCL2L1
Ether Lipid Biosynthesis WP5275	2/20	0.284178	0.73533	2.00116	2.51777	ARSA;PEX19
IL7 Signaling WP205	2/20	0.284178	0.73533	2.00116	2.51777	PIK3R1;JAK1
Pleural Mesothelioma WP5087	26/437	0.28723	0.73533	1.14177	1.42432	ATF2;FLT4;BRCA1;FGF1;NDRG1;WNT11;TERT;MYC;MAP4K3;JAK1;TEAD3;MCL1;NTRK2;CSNK2A1;FZD5;BDNF;LAMB2;SERPINF1;FN1;VEGFB;SENP2;MAPK10;COL4A2;COL4A1;CCNE1;CDK2
Melanoma WP4685	5/68	0.287374	0.73533	1.43009	1.78328	PREX2;GADD45A;CALML3;PIK3R1;SOS2
2Q37 Copy Number Variation Syndrome WP5224	9/136	0.288534	0.73533	1.27749	1.58785	GABARAPL1;ARF1;MAP1LC3B;RRAGC;UGT1A1;MTERF4;ILK;SEPTIN4;AGXT
Measles Virus Infection WP4630	9/136	0.288534	0.73533	1.27749	1.58785	MAPK10;CSNK2A1;CCNE1;CDK2;IRF7;PIK3R1;TLR4;BCL2L1;JAK1
Trans Sulfuration One Carbon Metabolism And Related Pathways WP2525	5/69	0.297728	0.73533	1.40767	1.70549	PCYT1B;GPX1;MTHFD1;SHMT1;GCLM
Sterol Regulatory Element Binding Proteins SREBP Signaling WP1982	5/69	0.297728	0.73533	1.40767	1.70549	MBTPS1;RBP4;SAR1B;LPL;LSS
Th17 Cell Differentiation Pathway WP5130	5/69	0.297728	0.73533	1.40767	1.70549	SOCS3;PRKCQ;LAT;IL27RA;JAK1
Effect Of Omega 3 PUFA On Huntington 39 S Disease Pathways WP5470	8/120	0.297785	0.73533	1.28742	1.55956	MAPK10;GABRB2;NTRK2;BDNF;PIK3R1;CYP46A1;GABRE;BCL2L1
Selenium Micronutrient Network WP15	6/86	0.29938	0.73533	1.3515	1.62997	FGB;FGA;GPX1;CAT;SEPHS2;PTGS1
Host Pathogen Interaction Of Human CoVs Apoptosis WP4864	2/21	0.304028	0.73533	1.89574	2.25714	MCL1;BCL2L1
Nicotine Effect On Dopaminergic Neurons WP1602	2/21	0.304028	0.73533	1.89574	2.25714	DDC;DRD3
17P13 3 YWHAE Copy Number Variation WP5376	2/21	0.304028	0.73533	1.89574	2.25714	DDC;YWHAG
GNAQ Pathways In Port Wine Stain WP5437	2/21	0.304028	0.73533	1.89574	2.25714	GNAQ;RHOA
Apoptosis Related Network Due To Altered Notch3 Ovarian Cancer WP2864	4/53	0.304523	0.73533	1.47063	1.7486	BEX3;SOCS3;TNFRSF10B;TNFRSF21
Kit Receptor Signaling WP304	4/53	0.304523	0.73533	1.47063	1.7486	MAPT;PIK3R1;CRK;VAV1
Myometrial Relaxation And Contraction Pathways WP289	10/156	0.306981	0.73533	1.23465	1.45808	RYR1;LINC02210-CRHR1;ATF2;GJA1;RGS3;GNAQ;PRKCQ;PRKACB;CRHR1;YWHAG
Serotonin HTR1 Group And FOS Pathway WP722	3/37	0.308785	0.73533	1.58933	1.86764	GNAQ;GNAI3;RHOA
Interferon Mediated Signaling WP4558	3/37	0.308785	0.73533	1.58933	1.86764	PIK3R1;IFNW1;JAK1
IL5 Signaling WP127	3/37	0.308785	0.73533	1.58933	1.86764	PIK3R1;MAPT;JAK1
miRNA Targeting Cancer Growth And Vascularization Glioblastoma WP3593	1/7	0.315225	0.73533	3.00079	3.46432	VEGFB
Cholesterol Biosynthesis With Skeletal Dysplasias WP4804	1/7	0.315225	0.73533	3.00079	3.46432	DHCR24
SARS CoV 2 And ACE2 Receptor Molecular Mechanisms WP4883	1/7	0.315225	0.73533	3.00079	3.46432	REN
Hypothetical Craniofacial Development Pathway WP3655	1/7	0.315225	0.73533	3.00079	3.46432	RHOA
Nanomaterial Induced Inflammasome Activation WP3890	1/7	0.315225	0.73533	3.00079	3.46432	TLR4
Aflatoxin B1 Metabolism WP699	1/7	0.315225	0.73533	3.00079	3.46432	EPHX1
Neuroinflammation And Glutamatergic Signaling WP5083	9/140	0.317685	0.73533	1.23822	1.41986	SOCS3;GRM5;GRIN3A;BDNF;SHMT1;GRIK2;DLD;SLC38A5;JAK1
Parkin Ubiquitin Proteasomal System Pathway WP2359	5/71	0.318604	0.73533	1.36487	1.56114	PRKN;PSMD12;CCNE1;UBA1;UBE2J2
Amyotrophic Lateral Sclerosis ALS WP2447	3/38	0.323438	0.73533	1.54384	1.7426	GPX1;CAT;BCL2L1
Nuclear Receptors WP170	3/38	0.323438	0.73533	1.54384	1.7426	THRA;VDR;NR2E1
G13 Signaling WP524	3/38	0.323438	0.73533	1.54384	1.7426	CDC42;MAPK10;RHOA
Transcription Factor Regulation In Adipogenesis WP3599	2/22	0.323773	0.73533	1.80086	2.03085	LEP;IRS2
Synthesis Of Ceramides And 1 Deoxyceramides WP5194	2/22	0.323773	0.73533	1.80086	2.03085	ASAH1;SPTLC1
PI3K AKT mTOR Vitamin D3 Signaling WP4141	2/22	0.323773	0.73533	1.80086	2.03085	VDR;MYC
Familial Hyperlipidemia Type 4 WP5111	2/22	0.323773	0.73533	1.80086	2.03085	LPL;GCK
Blood Clotting Cascade WP272	2/22	0.323773	0.73533	1.80086	2.03085	FGB;FGA
Apoptosis Modulation And Signaling WP1772	6/89	0.327415	0.739105	1.30245	1.45422	PEA15;CASP4;TNFRSF10B;SEPTIN4;MCL1;BCL2L1
Focal Adhesion PI3K Akt mTOR Signaling WP3932	18/303	0.332769	0.739105	1.13879	1.25303	CHRM2;ATF2;PFKFB3;LAMB2;FLT4;FN1;VEGFB;IRS2;PIK3R1;FGF1;LIPE;PPP2R1B;COL4A2;ITGAD;PPP2R2C;COL4A1;PELO;JAK1
VEGFA VEGFR2 Signaling WP3888	25/430	0.332874	0.739105	1.11339	1.22472	ATF2;KANK1;HDAC5;PLA2G5;PIK3R1;NDRG1;CDC42;GJA1;PTPRZ1;CCT7;ZC3H15;FGB;FGA;ANXA1;GPX1;EGR3;ARHGEF15;FN1;QKI;RHOA;DPM1;TFCP2;CRK;EIF4G2;BCL2L1
Epithelial To Mesenchymal Transition In Colorectal Cancer WP4239	10/160	0.334769	0.739105	1.20147	1.31479	NOTCH2;WNT11;FMNL2;COL4A2;FZD5;COL4A1;CLDN8;FN1;PIK3R1;SOS2
Ovarian Infertility WP34	3/39	0.338091	0.739105	1.50087	1.62761	VDR;SMPD1;MSH5
Chromosomal And Microsatellite Instability In Colorectal Cancer WP4216	5/73	0.339647	0.739105	1.32458	1.43035	MAPK10;GADD45A;MYC;RHOA;APPL1
Oncostatin M Signaling WP2374	4/56	0.340802	0.739105	1.38557	1.4915	SOCS3;CDK2;PIK3R1;JAK1
Thermogenesis WP4321	7/108	0.34186	0.739105	1.24872	1.34032	ATF2;LIPE;NPR1;ACSL4;ACSL3;PRKACB;SOS2
Photodynamic Therapy Induced NFE2L2 NRF2 Survival Signaling WP3612	2/23	0.343371	0.739105	1.71501	1.83325	EPHX1;GCLM
Roles Of Ceramides In Development Of Insulin Resistance WP5181	2/23	0.343371	0.739105	1.71501	1.83325	IRS2;PIK3R1
Unfolded Protein Response WP4925	2/23	0.343371	0.739105	1.71501	1.83325	MBTPS1;TNFRSF10B
Intestinal Microbiome On Anticoag Response Of Vit K Antagonists WP5273	1/8	0.351291	0.739105	2.57197	2.69065	VDR
Glucose Metabolism In Triple Negative Breast Cancer Cells WP5211	1/8	0.351291	0.739105	2.57197	2.69065	HK1
ApoE And miR 146 In Inflammation And Atherosclerosis WP3926	1/8	0.351291	0.739105	2.57197	2.69065	TLR4
Dual Hijack Model Of Vif In HIV Infection WP3300	1/8	0.351291	0.739105	2.57197	2.69065	CBFB
Peroxiredoxin 2 Induced Ovarian Failure WP4873	1/8	0.351291	0.739105	2.57197	2.69065	MAPK10
Hijack Of Ubiquitination By SARS CoV 2 WP4860	1/8	0.351291	0.739105	2.57197	2.69065	CBFB
Non Classical Role Of Vitamin D WP5133	1/8	0.351291	0.739105	2.57197	2.69065	REN
Cell Differentiation Index WP2029	1/8	0.351291	0.739105	2.57197	2.69065	HDAC5
Hunger And Satiety WP5445	1/8	0.351291	0.739105	2.57197	2.69065	LEP
Serine Metabolism WP4688	1/8	0.351291	0.739105	2.57197	2.69065	SHMT1
Neural Crest Cell Migration During Development WP4564	3/40	0.352724	0.739105	1.46023	1.52166	ARF1;BDNF;RHOA
Bladder Cancer WP2828	3/40	0.352724	0.739105	1.46023	1.52166	MMP1;MYC;PIK3R1
Proximal Tubule Transport WP4917	4/57	0.352937	0.739105	1.35935	1.41572	SLC12A4;SLC20A2;SLC6A20;ATP6V1F
Mesodermal Commitment Pathway WP2857	9/145	0.354903	0.740817	1.19238	1.2352	EPB41L5;EXT2;FZD5;SLC2A12;INHBA;ELP4;ZIC5;C9ORF72;PBX1
Follicle Stimulating Hormone FSH Signaling WP2035	2/24	0.362782	0.745164	1.63697	1.65981	H3-4;APPL1
GPCRs Class B Secretin Like WP334	2/24	0.362782	0.745164	1.63697	1.65981	LINC02210-CRHR1;CRHR1
Triacylglyceride Synthesis WP325	2/24	0.362782	0.745164	1.63697	1.65981	LIPE;LPL
Estrogen Metabolism WP5276	2/24	0.362782	0.745164	1.63697	1.65981	COMT;HSD17B10
MTHFR Deficiency WP4288	2/24	0.362782	0.745164	1.63697	1.65981	HNMT;COMT
Complement And Coagulation Cascades WP558	4/58	0.365072	0.745164	1.33411	1.34433	FGB;CFH;MASP1;CLU
Pre Implantation Embryo WP3527	4/58	0.365072	0.745164	1.33411	1.34433	PADI6;NLRP5;TPRX1;PBX1
Metapathway Biotransformation Phase I And II WP702	11/183	0.369869	0.752574	1.15233	1.14611	NAA50;NAT8;UGT1A1;EPHX1;CYP4F3;MGST1;GLYAT;CYP46A1;HNMT;COMT;SULT2A1
Dengue 2 Interactions With Complement And Coagulation Cascades WP3896	4/59	0.377197	0.755687	1.30978	1.27703	FGB;CFH;MASP1;CLU
MET In Type 1 Papillary Renal Cell Carcinoma WP4205	4/59	0.377197	0.755687	1.30978	1.27703	CDC42;PIK3R1;CRK;SOS2
Metabolic Reprogramming In Pancreatic Cancer WP5220	3/42	0.381851	0.755687	1.3852	1.33357	GFPT1;DLD;HK1
Eukaryotic Transcription Initiation WP405	3/42	0.381851	0.755687	1.3852	1.33357	TAF13;ILK;GTF2E2
Relationship Between Inflammation COX 2 And EGFR WP4483	2/25	0.381971	0.755687	1.56571	1.50686	MMP1;PTGER3
S1P Receptor Signal Transduction WP26	2/25	0.381971	0.755687	1.56571	1.50686	ASAH1;GNAI3
Adipogenesis WP236	8/131	0.385428	0.755687	1.1716	1.11701	CNTFR;LIPE;SOCS3;KLF6;GADD45A;LEP;LPL;IRS2
SARS CoV 2 B 1 1 7 Variant Antagonises Innate Immune Activation WP5116	1/9	0.385459	0.755687	2.25036	2.14531	TOMM70
Amino Acid Transport Defects IEMs WP5029	1/9	0.385459	0.755687	2.25036	2.14531	SLC6A20
Biotin Metabolism Including IMDs WP5031	1/9	0.385459	0.755687	2.25036	2.14531	PCCA
Thiamine Metabolic Pathways WP4297	1/9	0.385459	0.755687	2.25036	2.14531	SLC19A3
Benzo A Pyrene Metabolism WP696	1/9	0.385459	0.755687	2.25036	2.14531	EPHX1
Hepatitis B Infection WP4666	9/151	0.400212	0.770996	1.14163	1.04546	MAPK10;ATF2;EGR3;MYC;IRF7;PIK3R1;TLR4;SOS2;JAK1
Warburg Effect Mod By Deubiquitinating Enzymes And Substrates WP5216	2/26	0.400907	0.770996	1.5004	1.3714	OTUB2;MYC
Growth Factors And Hormones In Beta Cell Proliferation WP5385	2/26	0.400907	0.770996	1.5004	1.3714	MYC;CDK2
COVID 19 Structural Coverage Map WP5145	2/26	0.400907	0.770996	1.5004	1.3714	TOMM70;MACROD1
Modulators Of TCR Signaling And T Cell Activation WP5072	4/61	0.401367	0.770996	1.26369	1.1536	PRKCQ;PIK3R1;VAV1;LAT
Primary Ovarian Insufficiency WP5316	10/170	0.405798	0.770996	1.12578	1.01534	NOTCH2;TG;PCCA;SYCP2L;BDNF;MSH5;UBR2;BRCA1;COMT;SIL1
Neurodegeneration W Brain Fe Accumulation NBIA Subtypes Pathway WP4577	3/44	0.410675	0.770996	1.31749	1.17251	SPTLC1;C19ORF12;PIK3C3
Genes Controlling Nephrogenesis WP4823	3/44	0.410675	0.770996	1.31749	1.17251	NOTCH2;LAMB2;ILK
Notch Signaling WP268	3/44	0.410675	0.770996	1.31749	1.17251	NOTCH2;KCNJ5;DTX1
T Cell Antigen Receptor TCR Pathway During Staph A. Infection WP3863	4/62	0.413391	0.770996	1.24184	1.09699	DLG1;CHP1;PRKCQ;LAT
Proteasome Degradation WP183	4/62	0.413391	0.770996	1.24184	1.09699	PSMD12;PSMB5;PSMA1;UBA1
Clock Controlled Autophagy In Bone Metabolism WP5205	5/80	0.413652	0.770996	1.20051	1.05973	MAP1LC3B;SERPINF1;LEP;LAMP2;PIK3C3
mRNA Vaccine Activation Of Dendritic Cell And Induction IFN1 WP5187	1/10	0.417829	0.770996	2.00021	1.74555	IRF7
Acquired Partial Lipodystrophy Barraquer Simons Syndrome WP5104	1/10	0.417829	0.770996	2.00021	1.74555	FNTA
SARS CoV 2 And COVID 19 Pathway WP4846	1/10	0.417829	0.770996	2.00021	1.74555	ACAT1
Type III Interferon Signaling WP2113	1/10	0.417829	0.770996	2.00021	1.74555	JAK1
Lipid Particles Composition WP3601	1/10	0.417829	0.770996	2.00021	1.74555	LPL
Non Homologous End Joining WP438	1/10	0.417829	0.770996	2.00021	1.74555	DCLRE1C
Vitamin D Metabolism WP1531	1/10	0.417829	0.770996	2.00021	1.74555	VDR
Aspirin And miRNAs WP4707	1/10	0.417829	0.770996	2.00021	1.74555	PTGS1
Photodynamic Therapy Induced Unfolded Protein Response WP3613	2/27	0.419565	0.770996	1.4403	1.25096	DNAJC3;NARS1
Canonical And Non Canonical Notch Signaling WP3845	2/27	0.419565	0.770996	1.4403	1.25096	NOTCH2;CNTN6
Glycolysis And Gluconeogenesis WP534	3/45	0.424932	0.772843	1.28605	1.10064	DLD;GCK;HK1
Nephrotic Syndrome WP4758	3/45	0.424932	0.772843	1.28605	1.10064	LAMB2;GPC5;ARHGAP24
Oxidation By Cytochrome P450 WP43	4/63	0.425363	0.772843	1.22073	1.04349	CYB5R1;CYB5A;CYP4F3;CYP46A1
Lung Fibrosis WP3624	4/63	0.425363	0.772843	1.22073	1.04349	RTEL1;TERT;FAM13A;FGF1
17Q12 Copy Number Variation Syndrome WP5287	6/100	0.431751	0.778019	1.14936	0.965356	NEUROD2;RAD51D;TAF15;CCL18;RFFL;MYO19
3Q29 Copy Number Variation Syndrome WP4906	4/64	0.437272	0.778019	1.20032	0.992904	DYNC2LI1;DLG1;MYC;MAD2L1BP
Nanoparticle Mediated Activation Of Receptor Signaling WP2643	2/28	0.437921	0.778019	1.38483	1.14348	MAPK10;FN1
T Cell Receptor And Co Stimulatory Signaling WP2583	2/28	0.437921	0.778019	1.38483	1.14348	CD8B;DYRK1A
TLR4 Signaling And Tolerance WP3851	2/28	0.437921	0.778019	1.38483	1.14348	IRF7;TLR4
IL19 Signaling WP5422	2/28	0.437921	0.778019	1.38483	1.14348	MMP1;JAK1
Envelope Proteins And Potential Roles In EDMD Physiopathology WP4535	3/46	0.439068	0.778019	1.25608	1.03388	TMEM43;SOS2;RHOA
Translation Inhibitors In Chronically Activated PDGFRA Cells WP4566	3/46	0.439068	0.778019	1.25608	1.03388	MAPK10;CSNK2A1;PIK3R1
NO cGMP PKG Mediated Neuroprotection WP4008	3/46	0.439068	0.778019	1.25608	1.03388	NPR1;ACTN2;AKAP9
Induction Of Autophagy And TLR Signaling By Graphene Oxide WP5336	1/11	0.448495	0.780795	1.8001	1.44342	TLR4
SMC1 SMC3 Role In DNA Damage Cornelia De Lange Syndrome WP5118	1/11	0.448495	0.780795	1.8001	1.44342	BRCA1
Alternative Pathway Of Fetal Androgen Synthesis WP4524	1/11	0.448495	0.780795	1.8001	1.44342	CYB5A
Glycolysis In Senescence WP5049	1/11	0.448495	0.780795	1.8001	1.44342	HK1
GABA Metabolism Aka GHB WP4157	1/11	0.448495	0.780795	1.8001	1.44342	ADHFE1
Inclusion Body Myositis WP5120	1/11	0.448495	0.780795	1.8001	1.44342	MAPT
Ferroptosis WP4313	4/65	0.449109	0.780795	1.18058	0.945042	MAP1LC3B;ACSL4;ACSL3;GCLM
Selenium Metabolism And Selenoproteins WP28	3/47	0.453069	0.783762	1.22747	0.9718	FABP1;GPX1;SEPHS2
PDGFR Beta Pathway WP3972	2/29	0.455956	0.783762	1.33347	1.04726	PIK3R1;JAK1
Clear Cell Renal Cell Carcinoma Pathways WP4018	5/85	0.465802	0.783762	1.12518	0.85963	SHMT1;PLOD2;SDSL;PGM1;HK1
Pluripotent Stem Cell Differentiation Pathway WP2848	3/48	0.466922	0.783762	1.20013	0.914008	IL11;INHBA;FGF1
IL26 Signaling WP5347	3/48	0.466922	0.783762	1.20013	0.914008	SOCS3;MMP1;JAK1
Network Map Of SARS CoV 2 Signaling WP5115	14/254	0.469222	0.783762	1.05028	0.794726	TOMM70;FGB;FGA;ATE1;TLE1;CFH;SIGMAR1;FN1;RTN4;MAP1LC3B;CD8B;CDK1;PRKCQ;JAK1
NF1 Copy Number Variation Syndrome WP5366	6/104	0.469287	0.783762	1.10222	0.833871	CCNE1;H4C13;H3C1;RHOA;SYN1;MCL1
Inflammatory Response Pathway WP453	2/30	0.473651	0.783762	1.28578	0.960846	LAMB2;FN1
4P16 3 Copy Number Variation WP5365	2/30	0.473651	0.783762	1.28578	0.960846	PIK3R1;UBE2J2
Dopaminergic Neurogenesis WP2855	2/30	0.473651	0.783762	1.28578	0.960846	DDC;ALDH1A1
Autophagy WP4923	2/30	0.473651	0.783762	1.28578	0.960846	MAP1LC3B;PIK3C3
Cytokine Cytokine Receptor Interaction WP5473	14/255	0.47517	0.783762	1.04587	0.778211	CNTFR;IL11;XCR1;MPL;TNFRSF10B;INHBA;IFNW1;IL27RA;IL1RL1;ACVR1C;LEP;LEPR;CCL18;TNFRSF21
Bile Acid Synthesis And Enterohepatic Circulation WP4389	1/12	0.477548	0.783762	1.63636	1.20942	FXR1
Octadecanoid Formation From Linoleic Acid WP5324	1/12	0.477548	0.783762	1.63636	1.20942	PTGS1
PtdIns 4 5 P2 In Cytokinesis Pathway WP5199	1/12	0.477548	0.783762	1.63636	1.20942	RHOA
IL10 Anti Inflammatory Signaling WP4495	1/12	0.477548	0.783762	1.63636	1.20942	JAK1
Alanine And Aspartate Metabolism WP106	1/12	0.477548	0.783762	1.63636	1.20942	AGXT
RalA Downstream Regulated Genes WP2290	1/12	0.477548	0.783762	1.63636	1.20942	CDC42
Valproic Acid Pathway WP3871	1/12	0.477548	0.783762	1.63636	1.20942	HSD17B10
TGFB Smad Signaling WP5382	1/12	0.477548	0.783762	1.63636	1.20942	YWHAG
Aerobic Glycolysis WP4629	1/12	0.477548	0.783762	1.63636	1.20942	HK1
Irinotecan Pathway WP229	1/12	0.477548	0.783762	1.63636	1.20942	UGT1A1
RAC1 PAK1 P38 MMP2 Pathway WP3303	4/68	0.484106	0.787597	1.12506	0.816176	MYC;FN1;PIK3R1;CRK
Antiviral And Anti-Inflam Effects Of Nrf2 On SARS CoV 2 Pathway WP5113	2/31	0.490993	0.787597	1.24138	0.883025	MMP1;GCLM
Toll Like Receptor Signaling Related To MyD88 WP3858	2/31	0.490993	0.787597	1.24138	0.883025	IRF7;TLR4
Constitutive Androstane Receptor Pathway WP2875	2/31	0.490993	0.787597	1.24138	0.883025	UGT1A1;SULT2A1
GABA Receptor Signaling WP4159	2/31	0.490993	0.787597	1.24138	0.883025	GABRB2;GABRE
Base Excision Repair WP4752	2/31	0.490993	0.787597	1.24138	0.883025	NEIL3;MUTYH
MFAP5 Mediated Ovarian Cancer Cell Motility And Invasiveness WP3301	1/13	0.505072	0.787597	1.49992	1.02453	PRKCQ
Methionine Metabol To Sulfur Amino As And Related Disorders WP4292	1/13	0.505072	0.787597	1.49992	1.02453	ADK
Male Steroid Hormones In Cardiomyocyte Energy Metabolism WP5320	1/13	0.505072	0.787597	1.49992	1.02453	UGT1A1
Ganglio Series Sphingolipid Metabolism WP5299	1/13	0.505072	0.787597	1.49992	1.02453	NEU3
Mitochondrial Fission And Fusion WP4318	1/13	0.505072	0.787597	1.49992	1.02453	BCL2L1
Familial Hyperlipidemia Type 3 WP5110	1/13	0.505072	0.787597	1.49992	1.02453	LPL
Lactate Shuttle In Glial Cells WP5314	1/13	0.505072	0.787597	1.49992	1.02453	HK1
Leukotriene Metabolic Pathway WP5171	1/13	0.505072	0.787597	1.49992	1.02453	CYP4F3
Aerobic Glycolysis Augmented WP4628	1/13	0.505072	0.787597	1.49992	1.02453	HK1
Estrogen Receptor Pathway WP2881	1/13	0.505072	0.787597	1.49992	1.02453	ACOX1
Homologous Recombination WP186	1/13	0.505072	0.787597	1.49992	1.02453	RAD54B
Vitamin B12 Disorders WP4271	1/13	0.505072	0.787597	1.49992	1.02453	MTRR
Neuroinflammation WP4919	1/13	0.505072	0.787597	1.49992	1.02453	TLR4
Copper Homeostasis WP3286	3/51	0.507492	0.787597	1.12494	0.763019	ATP7B;SLC31A2;MAPT
2Q11 2 Copy Number Variation Syndrome WP5221	2/32	0.50797	0.787597	1.19994	0.812757	FAM178B;RHOA
Pregnane X Receptor Pathway WP2876	2/32	0.50797	0.787597	1.19994	0.812757	UGT1A1;SULT2A1
IL17 Signaling WP2112	2/32	0.50797	0.787597	1.19994	0.812757	IL17RE;JAK1
ErbB Signaling WP673	5/90	0.516457	0.798836	1.05871	0.699558	MAPK10;MYC;PIK3R1;SOS2;CRK
Mammary Gland Development Pregnancy And Lactation Stage 3 Of 4 WP2817	2/33	0.524572	0.802317	1.16117	0.749154	MYC;BCL2L1
Disruption Of Postsynaptic Signaling By CNV WP4875	2/33	0.524572	0.802317	1.16117	0.749154	DLG1;YWHAG
BDNF TrkB Signaling WP3676	2/33	0.524572	0.802317	1.16117	0.749154	NTRK2;BDNF
GPCRs Other WP117	5/91	0.52635	0.802317	1.04635	0.671533	CHRM2;PROKR2;ADGRG1;OR2A5;DRD3
Primary Focal Segmental Glomerulosclerosis FSGS WP2572	4/72	0.529301	0.802317	1.05866	0.673515	LAMB2;ILK;UTRN;TLR4
Abnormal Ca Handling And Effects On Muscle Contraction In DMD WP5343	1/14	0.531146	0.802317	1.38447	0.875978	RYR1
Cancer Immunotherapy By CTLA4 Blockade WP4582	1/14	0.531146	0.802317	1.38447	0.875978	PIK3R1
Kennedy Pathway From Sphingolipids WP3933	1/14	0.531146	0.802317	1.38447	0.875978	PCYT1B
Codeine And Morphine Metabolism WP1604	1/14	0.531146	0.802317	1.38447	0.875978	UGT1A1
Glucocorticoid Biosynthesis WP5280	1/14	0.531146	0.802317	1.38447	0.875978	CBR1
Head And Neck Squamous Cell Carcinoma WP4674	4/73	0.540295	0.810449	1.04326	0.642271	NOTCH2;TERT;PIK3R1;CSMD3
MECP2 And Associated Rett Syndrome WP3584	4/73	0.540295	0.810449	1.04326	0.642271	RBFOX1;BCL6;BDNF;POU4F1
Mitochondrial Complex IV Assembly WP4922	2/34	0.540792	0.810449	1.12482	0.691452	TACO1;COA6
8P23 1 Copy Number Variation Syndrome WP5346	3/54	0.546389	0.810449	1.0586	0.639844	TERT;PRSS55;TLR4
Vitamin B12 Metabolism WP1533	3/54	0.546389	0.810449	1.0586	0.639844	FGB;FGA;MTRR
Affected Pathways In Duchenne Muscular Dystrophy WP5356	4/74	0.551157	0.810449	1.0283	0.612595	RYR1;FGB;FGA;SIGMAR1
Cytosolic DNA Sensing Pathway WP4655	4/74	0.551157	0.810449	1.0283	0.612595	NLRX1;TREX1;IRF7;POLR2L
Transcriptional Activation By NRF2 In Response To Phytochemicals WP3	1/15	0.555849	0.810449	1.28551	0.754928	GCLM
GPCRs Class C Metabotropic Glutamate Pheromone WP501	1/15	0.555849	0.810449	1.28551	0.754928	GRM5
OSX And miRNAs In Tooth Development WP3971	1/15	0.555849	0.810449	1.28551	0.754928	NOTCH2
Cholesterol Biosynthesis Pathway WP197	1/15	0.555849	0.810449	1.28551	0.754928	LSS
Familial Hyperlipidemia Type 5 WP5112	1/15	0.555849	0.810449	1.28551	0.754928	LPL
Influence Of Laminopathies On Wnt Signaling WP4844	2/35	0.556623	0.810449	1.09068	0.638992	TLE1;FNTA
Pathogenic Escherichia Coli Infection WP2272	3/55	0.558949	0.810449	1.03819	0.603911	CDC42;TLR4;RHOA
Hematopoietic SC Differentiation WP2849	3/55	0.558949	0.810449	1.03819	0.603911	MXI1;GATA1;VAV1
Complement System WP2806	5/95	0.564985	0.810449	0.999629	0.570745	FGB;FGA;CFH;GNAI3;MASP1
Nonalcoholic Fatty Liver Disease WP4396	8/154	0.566739	0.810449	0.985829	0.559809	CDC42;SOCS3;UQCRB;LEP;LEPR;IRS2;PIK3R1;COX6B2
Host Pathogen Interaction Of Human Coronaviruses MAPK Signaling WP4877	2/36	0.572063	0.810449	1.05854	0.591204	MAPK10;ATF2
Vitamin D Sensitive Calcium Signaling In Depression WP4698	2/36	0.572063	0.810449	1.05854	0.591204	GRM5;VDR
Target Of Rapamycin Signaling WP1471	2/36	0.572063	0.810449	1.05854	0.591204	CDC42;RRAGC
Non Genomic Actions Of 1 25 Dihydroxyvitamin D3 WP4341	4/76	0.572466	0.810449	0.999629	0.557596	VDR;PRKCQ;TLR4;JAK1
Joubert Syndrome WP4656	4/76	0.572466	0.810449	0.999629	0.557596	TCTN1;ARMC9;UNC119;RHOA
TCA Cycle And Deficiency Of Pyruvate Dehydrogenase Complex PDHc WP2453	1/16	0.579251	0.810449	1.19975	0.655085	DLD
Classcl Pathway Steroidogenesis W Glucocort Mineralocort Metab WP4523	1/16	0.579251	0.810449	1.19975	0.655085	CYB5A
Pathways Of Nucleic Acid Metabolism And Innate Immune Sensing WP4705	1/16	0.579251	0.810449	1.19975	0.655085	TREX1
SARS CoV 2 Nsp1 Inhibits Translation Initiation In Host Cell WP5027	1/16	0.579251	0.810449	1.19975	0.655085	EIF1AX
Tryptophan Catabolism Leading To NAD Production WP4210	1/16	0.579251	0.810449	1.19975	0.655085	AADAT
Quercetin And Nf kB AP 1 Induced Apoptosis WP2435	1/16	0.579251	0.810449	1.19975	0.655085	MMP1
2Q21 1 Copy Number Variation Syndrome WP5223	1/16	0.579251	0.810449	1.19975	0.655085	RHOA
8Q11 23 RB1CC1 Copy Number Variation WP5412	1/16	0.579251	0.810449	1.19975	0.655085	GABARAPL1
Sulfation Biotransformation Reaction WP692	1/16	0.579251	0.810449	1.19975	0.655085	SULT2A1
Cysteine And Methionine Catabolism WP4504	1/16	0.579251	0.810449	1.19975	0.655085	MPST
Mitochondrial Complex III Assembly WP4921	1/16	0.579251	0.810449	1.19975	0.655085	UQCRB
Familial Hyperlipidemia Type 2 WP5109	1/16	0.579251	0.810449	1.19975	0.655085	LPL
N Glycan Biosynthesis WP5153	3/57	0.583428	0.814526	0.99963	0.538635	DPM1;MAN1A1;STT3B
Genetic Causes Of Porto Sinusoidal Vascular Disease WP5269	2/37	0.587107	0.81613	1.02825	0.54759	CDC42;GTF2I
miRNA Role In Immune Response In Sepsis WP4329	2/37	0.587107	0.81613	1.02825	0.54759	IRF7;TLR4
TGF Beta In Thyroid Cells For Epithelial Mesenchymal Transition WP3859	1/17	0.601421	0.817135	1.1247	0.571867	FN1
Platelet Mediated Interactions W Vascular And Circulating Cells WP4462	1/17	0.601421	0.817135	1.1247	0.571867	TLR4
MAP3K1 Role In Promoting And Blocking Gonadal Determination WP4872	1/17	0.601421	0.817135	1.1247	0.571867	RHOA
NOTCH1 Regulation Of Endothelial Cell Calcification WP3413	1/17	0.601421	0.817135	1.1247	0.571867	SOX6
Canonical And Non Canonical TGF B Signaling WP3874	1/17	0.601421	0.817135	1.1247	0.571867	LOX
NRXN1 Deletion Syndrome WP5398	1/17	0.601421	0.817135	1.1247	0.571867	GRIN3A
ACE Inhibitor Pathway WP554	1/17	0.601421	0.817135	1.1247	0.571867	REN
Cori Cycle WP1946	1/17	0.601421	0.817135	1.1247	0.571867	HK1
Relevant Molecular Pathways And Targeted Agents In TNBC WP5215	2/38	0.601755	0.817135	0.99963	0.507716	PIK3R1;SOS2
Type II Interferon Signaling WP619	2/38	0.601755	0.817135	0.99963	0.507716	SOCS3;JAK1
22Q11 2 Copy Number Variation Syndrome WP4657	6/119	0.601766	0.817135	0.955144	0.485105	PRKN;CDC42;ALDH4A1;SHOC2;COMT;RTN4
Hippo Merlin Signaling Dysregulation WP4541	6/120	0.609958	0.82436	0.946715	0.468023	NTRK2;ITGAD;MYC;FLT4;PRKACB;TEAD3
DNA Repair Pathways Full Network WP4946	6/120	0.609958	0.82436	0.946715	0.468023	NEIL3;DCLRE1C;CHEK1;BRCA1;RAD54B;MUTYH
Novel Intracellular Components Of RIG I Like Receptor Pathway WP3865	3/60	0.618483	0.82436	0.946867	0.454955	MAPK10;NLRX1;IRF7
2Q13 Copy Number Variation Syndrome WP5222	3/60	0.618483	0.82436	0.946867	0.454955	SOCS3;ZC3H8;POLR2L
Neural Crest Differentiation WP2064	5/101	0.619746	0.82436	0.936854	0.448234	NOTCH2;HDAC5;MYC;HOXB1;ZIC5
MFAP5 Effect On Permeability And Motility Of Endothelial Cells WP4560	1/18	0.622424	0.82436	1.05849	0.501865	PRKCQ
Exosome Biogenesis Inhib And Secretion Manumycin A CRPC Cells WP4301	1/18	0.622424	0.82436	1.05849	0.501865	RRAS2
Interactions Between LOXL4 And Oxidative Stress Pathway WP3670	1/18	0.622424	0.82436	1.05849	0.501865	FN1
Transcription Co Factors SKI And SKIL Protein Partners WP4533	1/18	0.622424	0.82436	1.05849	0.501865	TEAD3
TCA Cycle Aka Krebs Or Citric Acid Cycle WP78	1/18	0.622424	0.82436	1.05849	0.501865	DLD
MYD88 Distinct Input Output Pathway WP3877	1/18	0.622424	0.82436	1.05849	0.501865	TLR4
Familial Hyperlipidemia Type 1 WP5108	1/18	0.622424	0.82436	1.05849	0.501865	LPL
DYRK1A Involvement Regarding Cell Prolif In Brain Development WP5180	3/62	0.640713	0.837768	0.914673	0.407188	DYRK1A;SPRY2;MAPT
Extracellular Vesicles In The Crosstalk Of Cardiac Cells WP4300	1/19	0.642321	0.837768	0.99963	0.442503	TLR4
Host Pathogen Interaction Of Human CoVs Autophagy WP4863	1/19	0.642321	0.837768	0.99963	0.442503	PIK3C3
Apoptosis Modulation By HSP70 WP384	1/19	0.642321	0.837768	0.99963	0.442503	MAPK10
Small Ligand GPCRs WP247	1/19	0.642321	0.837768	0.99963	0.442503	PTGER3
Cholestasis WP5238	1/19	0.642321	0.837768	0.99963	0.442503	EPHX1
Glycosaminoglycan Synthesis In Fibroblasts WP5395	2/41	0.643329	0.837768	0.922589	0.406954	EXT2;CHPF2
Common Pathways Underlying Drug Addiction WP2636	2/41	0.643329	0.837768	0.922589	0.406954	GRM5;PRKACB
Chemokine Signaling WP3929	8/165	0.644818	0.837768	0.916222	0.402026	CDC42;XCR1;GNAI3;PIK3R1;PRKACB;SOS2;CRK;VAV1
Genes Related To Primary Cilium Development Based On CRISPR WP4536	5/104	0.645536	0.837768	0.90832	0.397548	DYNC2LI1;TTC23;TCTN1;ARMC9;CILK1
Splicing Factor NOVA Regulated Synaptic Proteins WP4148	2/42	0.656402	0.847823	0.899477	0.378663	GRIK2;ANK3
Hereditary Leiomyomatosis And Renal Cell Carcinoma Pathway WP4206	1/20	0.661171	0.847823	0.946968	0.391802	EGLN1
Ca Mediated T Cell Apoptosis Inclusion Body Myositis WP5142	1/20	0.661171	0.847823	0.946968	0.391802	CD8B
Serotonin Receptor 2 And ELK SRF GATA4 Signaling WP732	1/20	0.661171	0.847823	0.946968	0.391802	GNAQ
Cell Differentiation Expanded Index WP2023	1/20	0.661171	0.847823	0.946968	0.391802	HDAC5
Lipid Metabolism In Senescent Cells WP5149	1/20	0.661171	0.847823	0.946968	0.391802	PLA2G5
Hedgehog Signaling WP4249	2/43	0.66909	0.855018	0.877492	0.352609	FBXL17;PRKACB
Macrophage Stimulating Protein MSP Signaling WP5353	5/108	0.678166	0.855018	0.87286	0.338987	SOCS3;COL4A1;FN1;PIK3R1;NDRG1
Pathogenesis Of SARS CoV 2 Mediated By Nsp9 Nsp10 Complex WP4884	1/21	0.679028	0.855018	0.899572	0.348218	CD8B
STING Pathway In Kawasaki Like Disease And COVID 19 WP4961	1/21	0.679028	0.855018	0.899572	0.348218	NLRX1
7Q11 23 Distal Copy Number Variation WP5401	1/21	0.679028	0.855018	0.899572	0.348218	YWHAG
Tamoxifen Metabolism WP691	1/21	0.679028	0.855018	0.899572	0.348218	SULT2A1
FOXA2 Pathway WP5066	1/21	0.679028	0.855018	0.899572	0.348218	IRS2
Ebola Virus Infection In Host WP4217	6/129	0.679265	0.855018	0.877024	0.339183	CDC42;SOCS3;IRF7;PIK3R1;TLR4;RHOA
Perturbations Host Cell Autophagy Induced By SARS CoV 2 Prots WP4936	2/44	0.681395	0.855018	0.856554	0.328585	MAP1LC3B;LAMP2
Vasopressin Regulated Water Reabsorption WP5085	2/44	0.681395	0.855018	0.856554	0.328585	DYNC2LI1;PRKACB
AGE RAGE Pathway WP2324	3/66	0.682386	0.855018	0.856417	0.327288	CDC42;ATF2;RHOA
T Cell Activation SARS CoV 2 WP5098	4/88	0.687371	0.855018	0.85628	0.321003	PRKCQ;PIK3R1;LAT;BCL2L1
Orexin Receptor Pathway WP5094	4/88	0.687371	0.855018	0.85628	0.321003	RRAGC;LEP;GNAQ;PIK3R1
Aryl Hydrocarbon Receptor Pathway WP2873	2/45	0.693324	0.855018	0.83659	0.306408	UGT1A1;MGST1
Pathophysiological Roles Of DUX4 In FSHD1 WP5342	1/22	0.695945	0.855018	0.85669	0.310537	MYC
Methionine De Novo And Salvage Pathway WP3580	1/22	0.695945	0.855018	0.85669	0.310537	MSRB2
Glycerolipids And Glycerophospholipids WP4722	1/22	0.695945	0.855018	0.85669	0.310537	CRLS1
PKC Gamma Calcium Signaling In Ataxia WP4760	1/22	0.695945	0.855018	0.85669	0.310537	GNAQ
Vitamin D In Inflammatory Diseases WP4482	1/22	0.695945	0.855018	0.85669	0.310537	VDR
Progeria Associated Lipodystrophy WP5103	1/22	0.695945	0.855018	0.85669	0.310537	FNTA
Immune Response To Tuberculosis WP4197	1/22	0.695945	0.855018	0.85669	0.310537	JAK1
Sildenafil Treatment WP5294	1/22	0.695945	0.855018	0.85669	0.310537	PRKN
Cell Lineage Map For Neuronal Differentiation WP5417	6/132	0.700503	0.858974	0.856006	0.3047	DLG1;DLG3;GLRB;PPFIA1;FBXO15;HTR5A
Acute Myeloid Leukemia WP5293	3/68	0.701829	0.858974	0.829978	0.293867	MYC;PIK3R1;SOS2
HDAC6 Interactions In The Central Nervous System WP5426	5/112	0.708727	0.859965	0.840051	0.289217	PRKN;BDNF;NEDD9;PARK7;MAPT
Purine Metabolism And Related Disorders WP4224	1/23	0.711971	0.859965	0.817707	0.27779	GRM5
Cancer Immunotherapy By PD 1 Blockade WP4585	1/23	0.711971	0.859965	0.817707	0.27779	CD8B
LDL Influence On CD14 And TLR4 WP5272	1/23	0.711971	0.859965	0.817707	0.27779	TLR4
Post COVID Neuroinflammation WP5485	1/23	0.711971	0.859965	0.817707	0.27779	TLR4
Complement Activation WP545	1/23	0.711971	0.859965	0.817707	0.27779	MASP1
NRF2 ARE Regulation WP4357	1/23	0.711971	0.859965	0.817707	0.27779	GCLM
Physiological And Pathological Hypertrophy Of The Heart WP1528	1/24	0.727153	0.86874	0.782113	0.249195	RHOA
miRNA Regulation Of P53 Pathway In Prostate Cancer WP3982	1/24	0.727153	0.86874	0.782113	0.249195	TNFRSF10B
Hippocampal Synaptogenesis And Neurogenesis WP5231	1/24	0.727153	0.86874	0.782113	0.249195	BDNF
Urea Cycle And Associated Pathways WP4595	1/24	0.727153	0.86874	0.782113	0.249195	ALDH4A1
Kallmann Syndrome WP5074	1/24	0.727153	0.86874	0.782113	0.249195	PROKR2
Primary Ovarian Insufficiency WP5461	6/136	0.727317	0.86874	0.829491	0.264104	NOTCH2;SGO2;PCCA;SYCP2L;MSH5;SIL1
Non Small Cell Lung Cancer WP4255	3/72	0.737964	0.872793	0.781698	0.237527	GADD45A;PIK3R1;SOS2
Ectoderm Differentiation WP2858	6/138	0.740075	0.872793	0.816836	0.245871	ARHGAP10;FZD5;MYC;SPRY2;PDE7A;PGM1
Hypothesized Pathways In Pathogenesis Of Cardiovascular Disease WP3668	1/25	0.741536	0.872793	0.749485	0.22412	FBN3
4 Hydroxytamoxifen DEX And Retinoic Acids Regulation Of P27 WP3879	1/25	0.741536	0.872793	0.749485	0.22412	PIK3R1
Differentiation Of White And Brown Adipocyte WP2895	1/25	0.741536	0.872793	0.749485	0.22412	LEP
Glycosylation And Related Congenital Defects WP4521	1/25	0.741536	0.872793	0.749485	0.22412	DPM1
Mammalian Disorder Of Sexual Development WP4842	1/25	0.741536	0.872793	0.749485	0.22412	PBX1
Thyroxine Thyroid Hormone Production WP1981	1/25	0.741536	0.872793	0.749485	0.22412	TG
RANKL RANK Signaling WP2018	2/50	0.747521	0.878235	0.749247	0.218026	CDC42;PIK3R1
Burn Wound Healing WP5055	3/74	0.754686	0.880126	0.759598	0.213791	MMP1;INHBA;TLR4
Wnt Beta Catenin Signaling In Leukemia WP3658	1/26	0.755161	0.880126	0.719468	0.202044	MYC
Cytokines And Inflammatory Response WP530	1/26	0.755161	0.880126	0.719468	0.202044	IL11
EPO Receptor Signaling WP581	1/26	0.755161	0.880126	0.719468	0.202044	IRS2
Oxysterols Derived From Cholesterol WP4545	2/51	0.757318	0.880126	0.733917	0.204009	CYP46A1;SULT2A1
Synaptic Vesicle Pathway WP2267	2/51	0.757318	0.880126	0.733917	0.204009	PARK7;SYN1
Netrin UNC5B Signaling WP4747	2/52	0.766784	0.88465	0.719201	0.190984	PPP2R1B;RHOA
FGFR3 Signal Chondrocyte Proliferation Terminal Differentiation WP4767	1/27	0.768068	0.88465	0.691759	0.182539	THRA
Intracellular Trafficking Proteins Involved In CMT Neuropathy WP4856	1/27	0.768068	0.88465	0.691759	0.182539	NDRG1
Intraflagellar Transport Proteins Binding To Dynein WP4532	1/27	0.768068	0.88465	0.691759	0.182539	DYNC2LI1
1Q21 1 Copy Number Variation Syndrome WP4905	1/27	0.768068	0.88465	0.691759	0.182539	GJA1
NRP1 Triggered Signaling In Pancreatic Cancer WP5144	2/53	0.775928	0.889206	0.705061	0.178871	CCNE1;CDK2
Fragile X Syndrome WP4549	5/122	0.77599	0.889206	0.767844	0.194737	GABRB2;NTRK2;MAP1LC3B;GRM5;BDNF
Interactions Immune Cells And miRNAs In Tumor Microenvironment WP4559	1/28	0.780296	0.889206	0.666103	0.165248	TLR4
Interactions Of Natural Killer Cells In Pancreatic Cancer WP5092	1/28	0.780296	0.889206	0.666103	0.165248	MYC
Eicosanoid Metabolism Via Lipooxygenases LOX WP4721	1/28	0.780296	0.889206	0.666103	0.165248	ACOX1
Angiotensin II Receptor Type 1 Pathway WP5036	1/28	0.780296	0.889206	0.666103	0.165248	IL11
Phosphodiesterases In Neuronal Function WP4222	2/54	0.784756	0.889574	0.691466	0.167599	PDE7A;PDE8A
TGF Beta Receptor Signaling WP560	2/54	0.784756	0.889574	0.691466	0.167599	INHBA;JAK1
IL1 Signaling WP195	2/54	0.784756	0.889574	0.691466	0.167599	ATF2;PIK3R1
1P36 Copy Number Variation Syndrome WP5345	4/102	0.791543	0.894505	0.73341	0.17145	CFAP74;MUSK;GRIK2;UBE2J2
Statin Inhibition Of Cholesterol Production WP430	1/29	0.791879	0.894505	0.64228	0.149874	LPL
Overlap Between Signal Transduction Pathways LMNA Laminopathies WP4879	2/55	0.793277	0.894517	0.678384	0.157102	TLE1;FNTA
IL18 Signaling WP4754	2/56	0.801499	0.898612	0.665786	0.14732	PIK3R1;GATA1
Oligodendrocyte Differentiation Leading To Myelin For CNS WP4304	1/30	0.802853	0.898612	0.6201	0.136164	SOX6
Glycerophospholipid Biosynthetic Pathway WP2533	1/30	0.802853	0.898612	0.6201	0.136164	CRLS1
Ciliary Landscape WP4352	9/215	0.803874	0.898612	0.784274	0.171217	PSMD12;UBE2H;GID4;MAEA;APMAP;NEK7;COPS7B;ACSL3;RPGR
7Q11 23 Copy Number Variation Syndrome WP4932	4/104	0.803875	0.898612	0.718665	0.156893	MYC;DLD;GTF2I;ATPAF1
SARS Coronavirus And Innate Immunity WP4912	1/31	0.813248	0.907517	0.599398	0.123907	JAK1
Complement System In Neuronal Development And Plasticity WP5090	4/106	0.815607	0.908578	0.704499	0.143593	CFH;MASP1;CLU;MARK3
TGF Beta Receptor Signaling In Skeletal Dysplasias WP4816	2/58	0.817075	0.908643	0.64194	0.129688	INHBA;JAK1
MicroRNAs In Cardiomyocyte Hypertrophy WP1544	3/83	0.81952	0.90907	0.673821	0.134115	HDAC5;PIK3R1;RHOA
Initiation Of Transcription And Translation Elongation HIV1 LTR WP3414	1/32	0.823096	0.90907	0.580032	0.112922	HDAC5
PI3K AKT mTOR Signaling And Therapeutic In Prostate Cancer WP3844	1/32	0.823096	0.90907	0.580032	0.112922	PIK3R1
Monoamine Transport WP727	1/32	0.823096	0.90907	0.580032	0.112922	SYN1
10Q11 21Q11 23 Copy Number Variation Syndrome WP5352	2/60	0.831547	0.910023	0.619738	0.114322	ATF2;DLD
Oxidative Phosphorylation WP623	2/60	0.831547	0.910023	0.619738	0.114322	DMAC2L;ATP5MF
Host Pathogen Interaction Of Human CoV Interferon Induction WP4880	1/33	0.832425	0.910023	0.561876	0.103055	JAK1
Nuclear Receptors In Lipid Metabolism And Toxicity WP299	1/33	0.832425	0.910023	0.561876	0.103055	VDR
Fluoropyrimidine Activity WP1601	1/33	0.832425	0.910023	0.561876	0.103055	ABCC5
Prostaglandin Signaling WP5088	1/33	0.832425	0.910023	0.561876	0.103055	IRF7
JAK STAT Signaling In The Regulation Of Beta Cells WP5358	1/34	0.841262	0.914448	0.544821	0.0941735	SOCS3
Hepatocyte Growth Factor Receptor Signaling WP313	1/34	0.841262	0.914448	0.544821	0.0941735	CRK
Type 2 Papillary Renal Cell Carcinoma WP4241	1/34	0.841262	0.914448	0.544821	0.0941735	EGLN1
Hair Follicle Development Cytodifferentiation Stage 3 Of 3 WP2840	3/87	0.843299	0.914448	0.641599	0.10935	NOTCH2;SPINK6;DSC2
10Q22Q23 Copy Number Variation WP5402	2/62	0.844978	0.914448	0.599017	0.100901	ACTN2;ZMYND11
TAR Syndrome WP5362	2/62	0.844978	0.914448	0.599017	0.100901	PEX19;MAGOH
Photodynamic Therapy Induced NF kB Survival Signaling WP3617	1/35	0.849634	0.916699	0.528769	0.0861629	MMP1
Endochondral Ossification With Skeletal Dysplasias WP4808	2/63	0.851322	0.916699	0.589166	0.0948349	THRA;SOX6
Endochondral Ossification WP474	2/63	0.851322	0.916699	0.589166	0.0948349	THRA;SOX6
TNF Alpha Signaling WP231	3/89	0.854137	0.918197	0.626611	0.0987941	CSNK2A1;RFFL;BCL2L1
Factors And Pathways Affecting IGF1 Akt Signaling WP3850	1/36	0.857564	0.918819	0.513634	0.0789246	ILK
Zinc Homeostasis WP3529	1/36	0.857564	0.918819	0.513634	0.0789246	SLC39A10
Effect Of Progerin On Genes Involved In Progeria WP4320	1/37	0.865077	0.919224	0.49934	0.0723728	H3C1
Thymic Stromal Lymphopoietin TSLP Signaling WP2203	1/37	0.865077	0.919224	0.49934	0.0723728	JAK1
Melatonin Metabolism And Effects WP3298	1/37	0.865077	0.919224	0.49934	0.0723728	AANAT
Neovascularization Processes WP4331	1/37	0.865077	0.919224	0.49934	0.0723728	FLT4
Endoderm Differentiation WP2853	5/140	0.866119	0.919224	0.664829	0.0955581	EPB41L5;SLC2A12;ELP4;ZIC5;PBX1
SARS CoV 2 Innate Immunity Evasion And Cell Immune Response WP5039	2/66	0.868959	0.919224	0.561459	0.0788622	IRF7;JAK1
Histone Modifications WP2369	2/66	0.868959	0.919224	0.561459	0.0788622	H4C13;H3C1
Embryonic Stem Cell Pluripotency Pathways WP3931	4/117	0.870207	0.919224	0.635548	0.0883565	WNT11;FZD5;FGF1;JAK1
Striated Muscle Contraction Pathway WP383	1/38	0.872194	0.919224	0.485819	0.0664327	ACTN2
Sleep Regulation WP3591	1/38	0.872194	0.919224	0.485819	0.0664327	DRD3
Kisspeptin Kisspeptin Receptor System In The Ovary WP4871	1/39	0.878935	0.923312	0.473009	0.0610389	PRKCQ
Immune Infiltration In Pancreatic Cancer WP5285	1/39	0.878935	0.923312	0.473009	0.0610389	VEGFB
GPCRs Class A Rhodopsin Like WP455	10/259	0.880488	0.923438	0.719965	0.0916366	GPR27;CHRM2;P2RY6;XCR1;P2RY2;PTGER3;MLNR;OPRM1;HTR5A;DRD3
Toll Like Receptor Signaling WP75	3/95	0.882808	0.924369	0.585559	0.0729884	MAPK10;IRF7;TLR4
Catabolism Of Skeletal Muscle In Cachexia WP5474	1/40	0.885322	0.925498	0.460856	0.0561341	JAK1
Glucocorticoid Receptor Pathway WP2880	2/70	0.889486	0.928347	0.52832	0.0618723	EPB41L4B;IL11
DNA Replication WP466	1/42	0.897103	0.934784	0.438329	0.047596	CDK2
Axon Guidance WP5289	2/72	0.898592	0.934826	0.513171	0.0548714	CDC42;ILK
Inflammatory Bowel Disease Signaling WP5198	1/43	0.902531	0.937412	0.42787	0.0438788	TLR4
Extrafollicular And Follicular B Cell Activation By SARS CoV 2 WP5218	2/74	0.906995	0.938221	0.498864	0.0486985	BCL6;TLR4
16P11 2 Proximal Deletion Syndrome WP4949	2/74	0.906995	0.938221	0.498864	0.0486985	PPP4R2;CCT7
Heart Development WP1591	1/44	0.907674	0.938221	0.417897	0.0404817	VEGFB
Nucleotide Excision Repair In Xeroderma Pigmentosum WP5114	2/75	0.910947	0.940098	0.492004	0.0458893	H4C13;BRCA1
Overview Of Proinflammatory And Profibrotic Mediators WP5095	4/129	0.913311	0.941032	0.57417	0.0520647	IL11;MMP1;CCL18;IFNW1
Endoplasmic Reticulum Stress Response In Coronavirus Infection WP4861	1/46	0.91716	0.941988	0.399282	0.034527	MBTPS1
T Cell Modulation In Pancreatic Cancer WP5078	1/46	0.91716	0.941988	0.399282	0.034527	VEGFB
Electron Transport Chain OXPHOS System In Mitochondria WP111	3/105	0.919569	0.94296	0.527871	0.0442621	DMAC2L;UQCRB;ATP5MF
Wnt Signaling WP363	1/47	0.921532	0.943473	0.390581	0.0319175	RHOA
Energy Metabolism WP1541	1/48	0.925673	0.946211	0.382251	0.0295229	ATF2
Phosphoinositides Metabolism WP4971	1/49	0.929595	0.948717	0.374267	0.0273237	PIK3C3
Translation Factors WP107	1/50	0.933311	0.951004	0.36661	0.0253021	EIF1AX
Cardiac Progenitor Differentiation WP2406	1/53	0.943324	0.959691	0.345404	0.0201529	INHBA
Cardiac Hypertrophic Response WP2795	1/55	0.94915	0.962277	0.332576	0.0173568	HDAC5
Bardet Biedl Syndrome WP5234	2/88	0.949866	0.962277	0.417343	0.0214658	DYNC2LI1;CILK1
Mitochondrial Complex I Assembly Model OXPHOS System WP4324	1/56	0.951834	0.962277	0.326512	0.0161181	NDUFAF3
11P11 2 Copy Number Variation Syndrome WP5348	1/56	0.951834	0.962277	0.326512	0.0161181	EXT2
Allograft Rejection WP2328	2/90	0.954175	0.963134	0.407815	0.0191299	PECR;HARS1
15Q11Q13 Copy Number Variation WP5407	1/58	0.956786	0.964261	0.315022	0.0139163	GJA1
TYROBP Causal Network In Microglia WP3945	1/62	0.965216	0.971239	0.294303	0.0104194	GPX1
Ciliopathies WP4803	5/184	0.968192	0.972716	0.500235	0.0161702	DYNC2LI1;TCTN1;HYDIN;UNC119;CILK1
Prader Willi And Angelman Syndrome WP3998	2/102	0.973461	0.976489	0.358649	0.00964681	CDKN2B;BDNF
Peptide GPCRs WP24	1/72	0.979784	0.981305	0.252718	0.00516141	OPRM1
mRNA Processing WP411	2/125	0.990938	0.990938	0.291229	0.00265125	SNU13;CLK3

## Sheet: BioPlanet
Term	Overlap	P-value	Adjusted p-value	Odds Ratio	Combined Score	Genes
Fatty acid beta oxidation	9/34	4.77117e-05	0.0537234	6.52483	64.9242	GCDH;LIPE;ACSS2;LPL;ACSL4;ACSL3;CRAT;DLD;ACAT1
Thyroid-stimulating hormone signaling pathway	12/66	0.000150239	0.0714852	4.03309	35.5044	PAX8;CCNE1;MYC;KCNIP3;GNAQ;GNA12;CDK2;GNAI3;TTF2;PIK3R1;TTF1;JAK1
Tryptophan metabolism	11/58	0.000190458	0.0714852	4.24511	36.3639	GCDH;DDC;AOC1;AANAT;ALDH2;AADAT;ALDH1A1;CAT;DHCR24;HSD17B10;ACAT1
Glycogen breakdown (glycogenolysis)	5/14	0.000538134	0.151366	10.0392	75.5693	PYGB;PHKA1;PHKB;GYG2;PGM1
Carbohydrate metabolism	25/235	0.000672142	0.151366	2.16984	15.8508	PRPS2;PYGB;PFKFB3;HK1;PPP2R1B;NAGLU;GPC3;GPC5;GYG2;PRKACB;GPC6;ARSB;PGM1;ST3GAL3;CHPF2;ABCC5;PHKA1;KERA;PHKB;GCK;EXT2;G6PC2;GALE;FMOD;B4GALT6
MicroRNA regulation of DNA damage response	11/70	0.00101778	0.162936	3.37955	23.2855	CCNE1;GADD45A;MYC;CHEK1;CDK2;TLK2;CDK1;TNFRSF10B;BRCA1;ATRIP;CDC25A
Lipid and lipoprotein metabolism	42/489	0.0012964	0.162936	1.71934	11.4305	ARF1;ASAH1;LPGAT1;SLC44A4;SAR1B;PEX11A;LPL;CCNC;PLA2G5;ABHD5;PIK3R1;CYP46A1;ACAT1;LIPE;NEU3;HMGCL;SPTLC1;SMPD1;OSBP;ARSG;PRKACB;ARSB;SULT2A1;TEAD3;ARSA;PCYT1B;DHCR24;ACSL4;ACSL3;CRLS1;LSS;MED7;MED13L;FABP1;GALC;PHOSPHO1;BDH1;PCCA;ACOX1;PIK3C3;CRAT;TNFRSF21
Ketone body metabolism	3/5	0.00134327	0.162936	27.0643	178.967	HMGCL;BDH1;ACAT1
Signaling events mediated by PTP1B	9/52	0.00142894	0.162936	3.7899	24.8269	SOCS3;TRPV6;LEP;LEPR;SPRY2;PIK3R1;CRK;RHOA;LAT
Small cell lung cancer	12/84	0.00144703	0.162936	3.02193	19.7581	CDKN2B;COL4A2;CCNE1;COL4A1;LAMB2;MYC;CDK2;FN1;PIK3R1;SKP2;PIAS2;BCL2L1
Interaction between L1-type proteins and ankyrins	6/26	0.00194814	0.186141	5.42321	33.8456	ANK2;ANK3;SCN3B;SCN2A;SCN3A;SCN1B
Integrated cancer pathway	7/35	0.0020207	0.186141	4.52175	28.0543	MMP1;CHEK1;CDK2;CDK1;BRCA1;CDC25A;JAK1
Glycogen metabolism	7/36	0.00239623	0.186141	4.3656	26.3414	PYGB;PPP2R1B;PPP2R2C;PHKA1;PHKB;GYG2;PGM1
Peroxisome	11/78	0.00249735	0.186141	2.97476	17.8263	PECR;HMGCL;PEX19;ACOX1;PEX11A;CAT;PIPOX;ACSL4;ACSL3;AGXT;CRAT
p73 transcription factor network	11/79	0.0027664	0.186141	2.93086	17.2634	WWOX;S100A2;MYC;CHEK1;PEA15;CDK2;CDK1;NEDD4L;PRKACB;GATA1;JAK1
Cell cycle: G1/S checkpoint	6/28	0.00291387	0.186141	4.92967	28.7808	CDKN2B;CCNE1;CDK2;CDK1;SKP2;CDC25A
Metabolism	110/1615	0.00295609	0.186141	1.35189	7.87325	LPGAT1;CCNC;CYP46A1;COMT;LIPE;NAGLU;OSBP;DHRS4L2;GYG2;SEPHS2;ARSA;PIPOX;PHKA1;KERA;ACSL4;ACSL3;COX6B2;MED7;DPM1;PHOSPHO1;MTHFD1;GCDH;PFKFB3;UQCRB;SHMT1;PEX11A;MGST1;LPL;PLA2G5;PIK3R1;GLYAT;ABHD5;LIAS;ADH5;ACAT1;NEU3;AANAT;ARSG;ARSB;ST3GAL3;ATP6V1F;MPST;ADHFE1;CYP4F3;GFPT1;DHCR24;PHKB;INHBA;CRLS1;MED13L;EXT2;G6PC2;GNAQ;STT3B;GALNTL6;GCLM;PIGS;ARF1;ADPGK;PIGP;ADK;ACSM2B;HK1;SPTLC1;SPR;ALDH2;SMPD1;M…
PPAR signaling pathway	10/69	0.00315278	0.186141	3.06937	17.678	FABP1;FABP2;MMP1;ACOX1;AQP7;ILK;LPL;ACSL4;ACSL3;SORBS1
Insulin signaling pathway	26/277	0.00319559	0.186141	1.88572	10.8353	PYGB;ARF1;CBLC;CALML3;IRS2;PIK3R1;HK1;LIPE;SOCS3;MAP4K5;PRKACB;MAP4K3;CSNK2A1;PHKA1;PHKB;SORBS1;MAPK15;RHOA;GCK;MAPK10;G6PC2;PTPRA;PRKCQ;PIK3C3;CRK;SOS2
Glycosphingolipid metabolism	7/38	0.00330623	0.186141	4.08351	23.3248	GALC;NEU3;ARSA;ASAH1;SMPD1;ARSG;ARSB
FoxO family signaling	8/49	0.00378599	0.203001	3.53012	19.6855	MAPK10;BCL6;GADD45A;ZFAND5;CAT;CDK2;SKP2;YWHAG
Sphingolipid metabolism	10/72	0.00431552	0.220876	2.92039	15.9031	GALC;ARSA;NEU3;ASAH1;SPTLC1;SMPD1;OSBP;ARSG;B4GALT6;ARSB
Apoptosis	23/242	0.00459533	0.224972	1.90958	10.2787	BCAP31;PSMD12;TNFRSF10B;PIK3R1;EXOG;PSMA8;MAPK10;ARHGAP10;PSMB5;PSMA1;FNTA;STK24;MYC;CASP4;IRF7;CHP1;PRKCQ;MAPT;PRKACB;TNFRSF21;APPL1;MCL1;BCL2L1
S1P/S1P4 pathway	4/14	0.00500079	0.234621	7.22097	38.2579	CDC42;GNA12;GNAI3;RHOA
Fatty acid metabolism	7/42	0.00589003	0.263948	3.61606	18.5666	GCDH;ALDH2;ACOX1;ACSL4;ACSL3;ADH5;ACAT1
Cyclins and cell cycle regulation	5/23	0.00609471	0.263948	5.01723	25.5895	CDKN2B;CCNE1;CDK2;CDK1;CDC25A
Lysine catabolism	3/8	0.00667489	0.275565	10.824	54.2218	GCDH;AADAT;DLD
HIF-1 transcriptional activity in hypoxia	9/66	0.0074682	0.275565	2.85693	13.9907	EGLN1;PFKFB3;TERT;LEP;NDRG1;PGM1;GCK;HK1;MCL1
Apoptosis regulation	10/78	0.00763637	0.275565	2.66186	12.9761	ARHGAP10;PSMD12;PSMB5;PSMA1;CCNE1;CHEK1;CDK2;CDC25A;APPL1;PSMA8
Adipocytokine signaling pathway	9/67	0.00823489	0.275565	2.80752	13.4743	MAPK10;SOCS3;G6PC2;LEP;LEPR;IRS2;ACSL4;PRKCQ;ACSL3
Protein kinase A (PKA) at the centrosome	4/16	0.00835954	0.275565	6.01684	28.7867	AKAP9;CDK1;PRKACB;RHOA
Rb tumor suppressor/checkpoint signaling in response to DNA damage	4/16	0.00835954	0.275565	6.01684	28.7867	CDK2;CHEK1;CDK1;CDC25A
Fatty acid biosynthesis	5/25	0.00882138	0.275565	4.51503	21.3587	PECR;ACSS2;ACSL4;ECHDC3;ACSL3
G0 and early G1 pathway	5/25	0.00882138	0.275565	4.51503	21.3587	CCNE1;CDK2;DYRK1A;CDK1;CDC25A
Jak-STAT signaling pathway	19/199	0.00898878	0.275565	1.91582	9.02693	CNTFR;IL11;PTPRS;MPL;CBLC;PIK3R1;PIAS2;IFNW1;SOCS3;PTPRZ1;PTPRA;MYC;LEP;LEPR;SPRY2;PTPN4;SOS2;JAK1;BCL2L1
Interleukin-2/PI3K pathway	6/35	0.00918163	0.275565	3.73837	17.535	TERT;MYC;SMPD1;PIK3R1;JAK1;BCL2L1
G2/M DNA damage checkpoint	3/9	0.00962346	0.275565	9.01952	41.8826	CHEK1;CDK1;ATRIP
Ketone body biosynthesis and degradation	3/9	0.00962346	0.275565	9.01952	41.8826	HMGCL;BDH1;ACAT1
Galactose metabolism	5/26	0.0104579	0.275565	4.2998	19.6088	G6PC2;GALE;PGM1;GCK;HK1
Ras signaling pathway	5/26	0.0104579	0.275565	4.2998	19.6088	CDC42;PIK3R1;RHOA;VAV1;BCL2L1
Apoptotic cleavage of cellular proteins	4/17	0.0104833	0.275565	5.55371	25.3137	BCAP31;FNTA;STK24;PRKCQ
GRB2-SOS provides linkage to MAPK signaling for integrins	4/17	0.0104833	0.275565	5.55371	25.3137	FGB;FGA;FN1;CRK
Lysosome	13/121	0.0112868	0.275565	2.18044	9.77735	ARSA;CD164;ASAH1;AP3D1;GALC;LAPTM4A;NAGLU;SMPD1;LAMP2;ARSG;CTSF;CTSE;ARSB
Notch signaling pathway	13/121	0.0112868	0.275565	2.18044	9.77735	NOTCH2;SPEN;KCNJ5;TLE1;CNTN6;FHL1;DTX1;CCNC;PIK3R1;MYC;MAPT;SKP2;BCL2L1
Cell cycle: G2/M checkpoint	5/27	0.0122904	0.275565	4.10414	18.0538	GADD45A;CHEK1;CDK1;BRCA1;CDC25A
Nicotinic acetylcholine receptor role in the regulation of apoptosis	4/18	0.0129267	0.275565	5.15675	22.4239	MUSK;TERT;PIK3R1;RAPSN
Mitochondrial pathway of apoptosis: BH3-only Bcl-2 family	11/97	0.0129801	0.275565	2.31521	10.0581	MAPK10;STARD13;CSNK2A1;CAPN7;KCNIP3;CDK1;PRKCQ;CTSF;CTSE;PRKACB;ARHGAP24
Cyclin A-Cdk2-associated events at S phase entry	9/72	0.0129972	0.275565	2.58402	11.2225	PSMD12;PSMB5;PSMA1;CCNE1;MYC;CDK2;SKP2;CDC25A;PSMA8
Glycosaminoglycan metabolism	12/110	0.0130158	0.275565	2.21714	9.62592	EXT2;NAGLU;CHPF2;ABCC5;GPC3;KERA;GPC5;B4GALT6;FMOD;GPC6;ARSB;ST3GAL3
Pathways in cancer	27/325	0.0131923	0.275565	1.64686	7.1278	CBLC;PIK3R1;FGF1;CDC42;WNT11;MYC;SKP2;APPL1;JAK1;EGLN1;CDKN2B;FZD5;MMP1;LAMB2;FN1;VEGFB;RHOA;PIAS2;MAPK10;PAX8;COL4A2;CCNE1;COL4A1;CDK2;CRK;SOS2;BCL2L1
Activation of Src by protein tyrosine phosphatase alpha	3/10	0.0132154	0.275565	7.73061	33.4455	PTPRA;CDK1;CDC25A
Activation of calcium-permeable kainate receptor	3/10	0.0132154	0.275565	7.73061	33.4455	DLG1;DLG3;GRIK2
Cdc25 and Chk1 regulatory pathway in response to DNA damage	3/10	0.0132154	0.275565	7.73061	33.4455	CHEK1;CDK1;CDC25A
Ethanol oxidation	3/10	0.0132154	0.275565	7.73061	33.4455	ACSS2;ALDH2;ALDH1A1
Glucose metabolism	8/61	0.0142325	0.286176	2.72911	11.6048	PYGB;PFKFB3;PPP2R1B;PHKA1;PHKB;GYG2;PRKACB;PGM1
Leptin signaling pathway	8/61	0.0142325	0.286176	2.72911	11.6048	CDC42;SOCS3;LEP;LEPR;PIK3R1;RHOA;JAK1;BCL2L1
Type 2 diabetes mellitus	7/50	0.0151793	0.294922	2.94206	12.3208	MAPK10;SOCS3;IRS2;PIK3R1;GCK;HK1;CACNA1G
E2F transcription factor network	9/74	0.0153853	0.294922	2.50424	10.4536	TRRAP;CCNE1;MYC;CDK2;CDK1;BRCA1;CDC25A;SULT2A1;MCL1
E-cadherin nascent AJ-like junctions pathway	6/39	0.0154533	0.294922	3.28454	13.6963	CDC42;DLG1;CSNK2A1;PIK3R1;CRK;RHOA
Glycolysis and gluconeogenesis	9/75	0.0166934	0.31328	2.46617	10.0934	G6PC2;ACSS2;ALDH2;ADPGK;DLD;PGM1;ADH5;GCK;HK1
E2F1 destruction pathway	3/11	0.0174694	0.317267	6.76393	27.3757	CCNE1;CDK2;SKP2
Stress fiber formation mediated by Rho-selective guanine exchange factor AKAP13	3/11	0.0174694	0.317267	6.76393	27.3757	GNA12;PRKACB;RHOA
TGF-beta signaling pathway	17/185	0.0183338	0.320302	1.83422	7.33508	ATF2;CITED1;NEDD4L;NEDD9;PIK3R1;INHBA;MAPK15;PIAS2;RHOA;PJA1;CDC42;MAPK10;KLF6;TERT;MYC;CDK1;JAK1
Endothelins	8/64	0.0186512	0.320302	2.5825	10.2831	CDC42;MMP1;GNAQ;GNA12;GNAI3;PRKCQ;CRK;RHOA
Acute myocardial infarction	4/20	0.0188309	0.320302	4.51168	17.9215	FGB;FGA;COL4A2;COL4A1
Heparan sulfate/heparin glycosaminoglycan (HS-GAG) degradation	4/20	0.0188309	0.320302	4.51168	17.9215	NAGLU;GPC3;GPC5;GPC6
Interleukin-2/STAT5 pathway	5/30	0.0190588	0.320302	3.61107	14.3006	ELF1;MYC;PIK3R1;JAK1;BCL2L1
JNK/MAPK pathway	7/53	0.0204655	0.338885	2.74975	10.6938	CDC42;MAPK10;ATF2;GADD45A;DLD;MAPK15;GCK
Prostaglandin biosynthesis and regulation	5/31	0.0217666	0.355177	3.472	13.2887	ANXA1;ANXA2;PTGER3;ANXA6;PTGS1
Amoebiasis	11/105	0.022324	0.355177	2.11728	8.05008	SERPINB1;MUC2;COL4A2;ACTN2;COL4A1;LAMB2;GNAQ;FN1;PIK3R1;PRKACB;TLR4
Hormone-sensitive lipase (HSL)-mediated triacylglycerol hydrolysis	3/12	0.0223957	0.355177	6.01206	22.8391	LIPE;ABHD5;PRKACB
Phospholipid metabolism	18/205	0.023495	0.362402	1.74471	6.54435	ARSA;ARF1;PCYT1B;ASAH1;LPGAT1;SLC44A4;PIK3R1;PLA2G5;CRLS1;GALC;NEU3;PHOSPHO1;SPTLC1;SMPD1;OSBP;PIK3C3;ARSG;ARSB
Platelet activation, signaling and aggregation	18/205	0.023495	0.362402	1.74471	6.54435	FGB;FGA;ACTN2;FN1;GNAI3;VEGFB;MPL;PIK3R1;CLU;RHOA;VAV1;CDC42;GNAQ;LAMP2;GNA12;PRKCQ;CRK;LAT
Chk1/Chk2(Cds1)-mediated inactivation of cyclin B-Cdk1 complex	2/5	0.0248971	0.36887	12.0165	44.377	CHEK1;CDK1
Cyclin B2-mediated events	2/5	0.0248971	0.36887	12.0165	44.377	CDK1;CDC25A
Serotonin and melatonin biosynthesis	2/5	0.0248971	0.36887	12.0165	44.377	DDC;AANAT
L1CAM interactions	10/94	0.0259929	0.375289	2.15302	7.85836	DLG1;CSNK2A1;DLG3;CNTN6;ANK2;ANK3;SCN3B;SCN2A;SCN3A;SCN1B
Lysine degradation	6/44	0.026816	0.375289	2.85161	10.3193	GCDH;ALDH2;AADAT;PIPOX;PLOD2;ACAT1
Valine, leucine and isoleucine degradation	6/44	0.026816	0.375289	2.85161	10.3193	HMGCL;ALDH2;PCCA;HSD17B10;DLD;ACAT1
G-protein signaling pathways	10/95	0.0277336	0.375289	2.12757	7.62759	AKAP12;GNAQ;AKAP9;GNA12;GNAI3;PRKCQ;PDE7A;PDE8A;PRKACB;RHOA
Glycoprotein VI-mediated activation cascade	5/33	0.0279022	0.375289	3.22366	11.5376	CDC42;PIK3R1;RHOA;VAV1;LAT
Angiotensin-converting enzyme 2 regulation of heart function	3/13	0.0279967	0.375289	5.41057	19.3464	COL4A2;COL4A1;REN
Arylsulfatase activation	3/13	0.0279967	0.375289	5.41057	19.3464	ARSA;ARSG;ARSB
p27 phosphorylation regulation during cell cycle progression	3/13	0.0279967	0.375289	5.41057	19.3464	CCNE1;CDK2;SKP2
Amino sugar and nucleotide sugar metabolism	6/45	0.0296114	0.388892	2.77834	9.77863	CYB5R1;GALE;GFPT1;PGM1;GCK;HK1
Long-term depression	8/70	0.0302758	0.388892	2.33184	8.15539	RYR1;GRM5;PPP2R1B;GNAQ;GNA12;GNAI3;PLA2G5;CRHR1
Mitochondrial fatty acid beta-oxidation	4/23	0.030393	0.388892	3.79871	13.2709	PECR;PCCA;ACSL4;ACSL3
Mitochondrial pathway of apoptosis: antiapoptotic Bcl-2 family	4/23	0.030393	0.388892	3.79871	13.2709	MAPK10;MAPK15;BCL2L1;MCL1
TSH regulation of gene expression	10/97	0.0314609	0.398033	2.07844	7.18936	NOTCH2;TG;PAX8;MYC;VEGFB;EMP1;TTF2;PIK3R1;TTF1;STX11
Biological oxidations	13/139	0.0318311	0.398243	1.86716	6.43669	ACSS2;UGT1A1;CYP4F3;MGST1;GLYAT;COMT;CYP46A1;ACSM2B;PTGS1;ALDH2;ALDH1A1;GCLM;SULT2A1
Bacterial invasion of epithelial cells	8/71	0.0326078	0.399091	2.29471	7.85525	CDC42;ARHGAP10;FN1;CBLC;ILK;PIK3R1;CRK;RHOA
Interleukin-6 signaling pathway	8/71	0.0326078	0.399091	2.29471	7.85525	SOCS3;CSNK2A1;MYC;PIK3R1;VAV1;JAK1;MCL1;BCL2L1
Integrin signaling pathway	14/155	0.0344192	0.41008	1.79717	6.05493	LRPAP1;ACTN2;ILK;NEDD9;MAPK15;RHOA;CDC42;MAPK10;ARHGAP10;CAPN7;TSPAN6;TLN2;CRK;SOS2
Dorso-ventral axis formation	4/24	0.0349975	0.41008	3.60858	12.0977	NOTCH2;PIWIL2;SPIRE2;SOS2
Proteasome complex	4/24	0.0349975	0.41008	3.60858	12.0977	PSMD12;PSMB5;PSMA1;UBA1
Beta-oxidation of very long chain fatty acids	2/6	0.036055	0.41008	9.01189	29.9439	ACOX1;CRAT
Low-density lipoprotein (LDL) pathway during atherogenesis	2/6	0.036055	0.41008	9.01189	29.9439	LPL;ACAT1
Neurotransmitter clearance in the synaptic cleft	2/6	0.036055	0.41008	9.01189	29.9439	ALDH2;COMT
Small leucine-rich proteoglycan (SLRP) molecules	2/6	0.036055	0.41008	9.01189	29.9439	KERA;FMOD
Ephrin receptor B forward pathway	7/60	0.0374834	0.417884	2.38569	7.83427	FGB;CDC42;FGA;RGS3;ITSN1;PIK3R1;CRK
Neurotrophic factor-mediated Trk receptor signaling	7/60	0.0374834	0.417884	2.38569	7.83427	CDC42;NTRK2;BDNF;NEDD4L;PIK3R1;CRK;RHOA
ATM pathway	6/48	0.039118	0.428774	2.57948	8.36053	DCLRE1C;GADD45A;TREX1;CHEK1;BRCA1;CDC25A
Oncostatin M	24/311	0.0397598	0.428774	1.51644	4.89037	FGB;IL11;SERPINB1;ANXA1;MUSK;MMP1;FN1;NEDD4L;LPL;CALML3;RNASE4;DHCR24;HTR3A;ACSL3;GRIK2;CST6;STX11;DNAJC3;SOCS3;PTPRZ1;MYC;CASP4;SKP2;DSC2
Fatty acid, triacylglycerol, and ketone body metabolism	15/173	0.039927	0.428774	1.71846	5.53466	PEX11A;CCNC;ACSL4;ACSL3;MED7;ACAT1;MED13L;FABP1;HMGCL;BDH1;PCCA;ACOX1;TNFRSF21;SULT2A1;TEAD3
Corticotropin releasing hormone pathway	4/25	0.0399834	0.428774	3.43656	11.0633	GJA1;TLR4;CRHR1;SULT2A1
ATR activation in response to replication stress	3/15	0.0412008	0.429557	4.50833	14.3784	CHEK1;ATRIP;CDC25A
Biogenic amine biosynthesis	3/15	0.0412008	0.429557	4.50833	14.3784	DDC;AANAT;COMT
Fibrinolysis pathway	3/15	0.0412008	0.429557	4.50833	14.3784	FGB;FGA;UBA1
Platelet aggregation (plug formation)	5/37	0.0431975	0.446242	2.8201	8.86069	FGB;FGA;MPL;FN1;CRK
MAPK signaling pathway	24/314	0.043621	0.446521	1.50051	4.69993	ATF2;NTRK2;GADD45A;BDNF;RRAS2;PLA2G5;FGF1;GCK;CACNA1G;CACNG6;CDC42;MAPK10;CACNG8;ACVR1C;RASA3;MYC;GNA12;CHP1;MAPT;PRKACB;CRK;SOS2;MAP4K3;CACNG4
Inhibition of activated T cell apoptosis by neuropeptides VIP and PACAP	4/26	0.0453517	0.460054	3.28018	10.1466	EGR3;MYC;GNAQ;PRKACB
Interleukin-2 signaling pathway	56/847	0.0466917	0.467606	1.28925	3.9505	DDX42;IRS2;LSP1;RGS3;MYC;CTSF;CIC;JAK1;GTF2I;DENND2D;CSNK2A1;MMD;VPS13A;RRAS2;HTR3A;ANK2;PIAS2;RHOA;DNAJC3;ELF1;MTHFD1;MMP16;MDFIC;CCNE1;ANG;MAPT;VAMP4;TLR4;TMF1;PFKFB3;CBFB;HPN;PTGER3;MGST1;PIK3R1;SOCS3;TERT;MXI1;GPC3;CRYM;ZNF267;OPCML;CYB5A;ST13;GCK;GALE;KLF6;BCL6;TRPV6;CDK2;CDK1;ESYT1;PTPN4;PDE7A;LAT;BCL2L1
Attachment of GPI anchor to uPAR	2/7	0.0487406	0.467606	7.20913	21.7805	PIGS;PIGK
NrCAM interactions	2/7	0.0487406	0.467606	7.20913	21.7805	DLG1;DLG3
SLC26 family multifunctional anion exchangers	2/7	0.0487406	0.467606	7.20913	21.7805	SLC26A1;SLC26A7
Inhibitor of DNA binding (ID) signaling pathway	3/16	0.0487796	0.467606	4.16132	12.569	PAX8;CCNE1;CDK2
PI3K subunit p85 role in regulation of actin organization and cell migration	3/16	0.0487796	0.467606	4.16132	12.569	CDC42;PIK3R1;RHOA
G alpha (12/13) signaling events	8/77	0.0491783	0.467606	2.0945	6.30927	CDC42;PLEKHG5;ITSN1;GNA12;PIK3R1;SOS2;RHOA;VAV1
Antigen presentation: folding, assembly, and peptide loading of class I MHC proteins	20/255	0.0494184	0.467606	1.54164	4.63637	PSMD12;UBE2H;UBE2D4;SAR1B;NEDD4L;LNPEP;UBR2;RNF6;UBE2J2;LRRC41;PSMA8;PJA1;SPSB2;SOCS3;PSMB5;PSMA1;ASB10;FBXO3;UBA1;SKP2
Ubiquitin-mediated degradation of phosphorylated Cdc25A	7/64	0.0504675	0.473554	2.21781	6.62331	PSMD12;PSMB5;PSMA1;CHEK1;CDK2;CDC25A;PSMA8
Amino acid metabolism	16/195	0.0527563	0.486922	1.61773	4.75948	GCDH;PSMD12;DDC;AADAT;SHMT1;INHBA;HSD17B10;PSMA8;ACAT1;ALDH4A1;PSMB5;AANAT;PSMA1;GCLM;AGXT;DLD
Mitotic G1-G1/S phases	12/135	0.0527571	0.486922	1.76416	5.19025	PSMD12;CDKN2B;PSMB5;PPP2R1B;PSMA1;CCNE1;MYC;CDK2;DYRK1A;CDK1;SKP2;CDC25A
LPA receptor mediated events	7/65	0.054106	0.488194	2.17945	6.35705	GNAQ;GNA12;GNAI3;MAPT;PIK3R1;CRK;RHOA
Interleukin-2 receptor beta chain in T cell activation	6/52	0.0545125	0.488194	2.35468	6.85052	SOCS3;CCNE1;MYC;PIK3R1;JAK1;BCL2L1
Post-translational protein modification	16/196	0.0547726	0.488194	1.60866	4.67245	PIGS;ARSA;SAR1B;PIGP;GFPT1;DPM1;B3GNT8;MUC2;PIGK;GCNT3;MAN1A1;ARSG;GALNTL6;B4GALT6;ARSB;ST3GAL3
Acyl chain remodelling of phosphatidylglycerol	3/17	0.056986	0.488194	3.86388	11.0698	LPGAT1;PLA2G5;CRLS1
Branched-chain amino acid catabolism	3/17	0.056986	0.488194	3.86388	11.0698	HSD17B10;DLD;ACAT1
G1/S-specific transcription	3/17	0.056986	0.488194	3.86388	11.0698	CCNE1;CDK1;CDC25A
TRAIL signaling pathway	4/28	0.0572303	0.488194	3.00651	8.60065	SMPD1;TNFRSF10B;PIK3R1;DAP3
EGFR1 pathway	13/152	0.0580538	0.488194	1.69137	4.81428	ANXA1;GADD45A;MMP1;EMP1;CCNC;CDC42;BCL6;MYC;SPRY2;MAPT;GABRE;PDE7A;CRYAB
Integrated breast cancer pathway	13/152	0.0580538	0.488194	1.69137	4.81428	USP38;ANXA1;GADD45A;MMP1;AQP7;BRCA1;CDC25A;CDC42;MYC;CHEK1;CDK2;ZNF655;JAK1
Starch and sucrose metabolism	6/53	0.058859	0.488194	2.30446	6.52763	PYGB;G6PC2;UGT1A1;PGM1;GCK;HK1
Nuclear beta-catenin signaling and target gene transcription regulation	8/80	0.0591989	0.488194	2.00691	5.67324	TLE1;MDFIC;TERT;TRRAP;MYC;SP5;YWHAG;CACNA1G
Rho GTPase cycle	11/123	0.0597116	0.488194	1.7753	5.00321	CDC42;ARHGAP10;STARD13;PLEKHG5;FAM13A;ITSN1;ARHGAP6;SOS2;ARHGAP24;RHOA;VAV1
Axon guidance	24/325	0.0601372	0.488194	1.44482	4.06159	EPHA6;CSNK2A1;CNTN6;SEMA3B;GNAI3;ANK2;ANK3;RHOA;CACNA1G;CDC42;DLG1;RGS3;COL4A2;DLG3;COL4A1;PTPRA;CDK1;CHP1;PRKCQ;SCN3B;SCN2A;SCN3A;SOS2;SCN1B
G1 to S cell cycle control	7/67	0.0618628	0.488194	2.10658	5.86227	CDKN2B;CCNE1;GADD45A;MYC;CDK2;CDK1;CDC25A
ERBB1 internalization pathway	5/41	0.0626782	0.488194	2.50623	6.94161	CDC42;ITSN1;SPRY2;PIK3R1;STAMBP
FOXM1 transcription factor network	5/41	0.0626782	0.488194	2.50623	6.94161	CCNE1;MYC;CDK2;CDK1;SKP2
Folate and pterine metabolism	2/8	0.0627626	0.488194	6.00729	16.6306	MTHFD1;SHMT1
Glycogen biosynthesis	2/8	0.0627626	0.488194	6.00729	16.6306	GYG2;PGM1
Wnt signaling pathway	18/231	0.0629645	0.488194	1.52962	4.22968	TLE1;CSNK2A1;FZD5;SOX14;INHBA;SENP2;RHOA;NKD1;MAPK10;GJA1;WNT11;PPP2R1B;MYC;CHP1;PRKCQ;GPC5;SOX6;PRKACB
T cell receptor signaling pathway	12/139	0.0630865	0.488194	1.70823	4.72026	CDC42;DLG1;CD8B;CBLC;CHP1;PRKCQ;PIK3R1;ARHGAP6;SOS2;LAT;RHOA;VAV1
p53 signaling pathway	12/139	0.0630865	0.488194	1.70823	4.72026	GPX1;S100A2;BCL6;TRRAP;GADD45A;VDR;TNFRSF10B;SCN3B;NDRG1;POU4F1;MCL1;BCL2L1
Histidine metabolism	4/29	0.063734	0.488194	2.8861	7.94554	DDC;AOC1;ALDH2;HNMT
Influence of Ras and Rho proteins on G1 to S transition	4/29	0.063734	0.488194	2.8861	7.94554	CCNE1;CDK2;PIK3R1;RHOA
Post-translational modification: biosynthesis of GPI-anchored proteins	4/29	0.063734	0.488194	2.8861	7.94554	PIGS;DPM1;PIGP;PIGK
S1P/S1P3 pathway	4/29	0.063734	0.488194	2.8861	7.94554	GNAQ;GNA12;GNAI3;RHOA
CBL signaling regulation	3/18	0.0657978	0.489731	3.6061	9.81279	PIK3R1;CRK;VAV1
Phosphatidylcholine biosynthesis	3/18	0.0657978	0.489731	3.6061	9.81279	PCYT1B;PHOSPHO1;SLC44A4
Pre-NOTCH processing in Golgi	3/18	0.0657978	0.489731	3.6061	9.81279	NOTCH2;TMED2;ST3GAL3
AMPK signaling	7/68	0.0659827	0.489731	2.07194	5.63228	LIPE;PFKFB3;LEP;LEPR;PIK3C3;PIK3R1;PRKACB
ATM-dependent DNA damage response	8/82	0.0665443	0.489731	1.95246	5.29096	CDC42;MAPK10;WNT11;BCL6;MYC;CAT;SOS2;RHOA
SMAD2/3 nuclear pathway	8/82	0.0665443	0.489731	1.95246	5.29096	ATF2;CDKN2B;CITED1;CBFB;VDR;MYC;CDK2;IRF7
Focal adhesion	18/233	0.0672198	0.49149	1.51523	4.09079	ACTN2;LAMB2;FLT4;FN1;VEGFB;ILK;PIK3R1;RHOA;VAV1;CDC42;MAPK10;COL4A2;ITGAD;COL4A1;TLN2;PELO;CRK;SOS2
Neurotrophin signaling pathway	11/126	0.0685288	0.496007	1.72872	4.63383	CDC42;MAPK10;NTRK2;BDNF;CALML3;IRS2;PIK3R1;CRK;SOS2;YWHAG;RHOA
EGF/EGFR signaling pathway	12/141	0.0687185	0.496007	1.68157	4.50279	CDC42;ERRFI1;GJA1;CBLC;SPRY2;STAMBP;PIK3R1;RIN1;CRK;SOS2;VAV1;JAK1
Butanoate metabolism	4/30	0.0706071	0.503187	2.77495	7.35535	HMGCL;BDH1;ACSM2B;ACAT1
Heparan sulfate/heparin glycosaminoglycan (HS-GAG) biosynthesis	4/30	0.0706071	0.503187	2.77495	7.35535	EXT2;GPC3;GPC5;GPC6
Wnt signaling pathway and pluripotency	9/98	0.0730346	0.517213	1.82662	4.77993	MAPK10;WNT11;PPP2R1B;FZD5;PPP2R2C;MYC;PRKCQ;RHOA;NKD1
G2/M checkpoints	5/43	0.0739977	0.520759	2.37407	6.18142	CHEK1;CDK2;CDK1;ATRIP;CDC25A
AP-1 transcription factor network	7/70	0.0747073	0.522487	2.00595	5.20379	ATF2;GJA1;ELF1;CBFB;MMP1;MYC;CDK1
Cell cycle progression regulation by PLK3	3/19	0.0751902	0.522618	3.38054	8.74793	TREX1;CHEK1;CDK1
Alpha-6 beta-4 integrin signaling pathway	4/31	0.0778427	0.523501	2.67203	6.82188	LAMB2;IRS2;PIK3R1;RHOA
Alpha-V beta-3 integrin/OPN pathway	4/31	0.0778427	0.523501	2.67203	6.82188	CDC42;ILK;PIK3R1;RHOA
Keratan sulfate/keratin metabolism	4/31	0.0778427	0.523501	2.67203	6.82188	KERA;B4GALT6;FMOD;ST3GAL3
Axonogenesis regulation by p75 neurotrophin receptor	2/9	0.0779452	0.523501	5.14884	13.1385	RHOA;RTN4
Mechanism of gene regulation by peroxisome proliferators via PPAR-alpha	6/57	0.0782522	0.523501	2.12327	5.4097	FABP1;ACOX1;MYC;LPL;PIK3R1;PRKACB
SHP2 signaling	6/57	0.0782522	0.523501	2.12327	5.4097	NTRK2;BDNF;GNAI3;PIK3R1;RHOA;JAK1
Integrin cell surface interactions	8/85	0.0785716	0.523501	1.8761	4.77231	FGB;FGA;COL4A2;ITGAD;COL4A1;LAMB2;FN1;CRK
Phase II of biological oxidations: conjugation	7/71	0.079312	0.525325	1.9745	5.00411	UGT1A1;MGST1;GLYAT;COMT;GCLM;ACSM2B;SULT2A1
Golgi-associated vesicle biogenesis	3/20	0.085136	0.556054	3.18151	7.83767	ARF1;PUM1;CLINT1
Glycine, serine and threonine metabolism	4/32	0.0854328	0.556054	2.57647	6.33818	SHMT1;PIPOX;AGXT;DLD
Prothrombin activation intrinsic pathway	4/32	0.0854328	0.556054	2.57647	6.33818	FGB;FGA;COL4A2;COL4A1
Interleukin-3, interleukin-5, and GM-CSF signaling	5/45	0.086351	0.5588	2.25513	5.52357	PIK3R1;PRKACB;CRK;VAV1;JAK1
Myc repressed pathway	7/73	0.0890037	0.5671	1.91446	4.63124	CDKN2B;GADD45A;MYC;CSDE1;BRCA1;CLU;NDRG1
Cell cycle checkpoints	10/117	0.0890435	0.5671	1.68816	4.08303	PSMD12;PSMB5;PSMA1;CCNE1;CHEK1;CDK2;CDK1;ATRIP;CDC25A;PSMA8
ATF2 transcription factor network	6/59	0.0891446	0.5671	2.04293	4.93877	ATF2;SOCS3;CBFB;GADD45A;BRCA1;BCL2L1
Tight junction	11/133	0.0922145	0.572907	1.62892	3.88276	CDC42;PPP2R1B;CSNK2A1;PPP2R2C;ACTN2;CLDN8;MAGI2;GNAI3;RRAS2;PRKCQ;RHOA
E2F-mediated regulation of DNA replication	4/33	0.093368	0.572907	2.48749	5.89836	PPP2R1B;CCNE1;CDK1;CDC25A
Propanoate metabolism	4/33	0.093368	0.572907	2.48749	5.89836	ACSS2;ALDH2;PCCA;ACAT1
Activation of the AP-1 family of transcription factors	2/10	0.0941277	0.572907	4.505	10.6458	MAPK10;ATF2
E2F-enabled inhibition of pre-replication complex formation	2/10	0.0941277	0.572907	4.505	10.6458	CDK1;CDC25A
Interferon-alpha signaling pathway	2/10	0.0941277	0.572907	4.505	10.6458	ST13;JAK1
Phospholipase C signaling pathway	2/10	0.0941277	0.572907	4.505	10.6458	PIK3R1;VAV1
Purine catabolism	2/10	0.0941277	0.572907	4.505	10.6458	GPX1;CAT
PKC-catalyzed phosphorylation of inhibitory phosphoprotein of myosin phosphatase	3/21	0.0956061	0.578777	3.0046	7.05336	GNAQ;GNA12;VAV1
Interleukin-4 signaling pathway	9/104	0.0972732	0.58572	1.71071	3.98635	ATF2;SOCS3;BCL6;IRS2;PIK3R1;OPRM1;SOS2;BCL2L1;JAK1
Arrhythmogenic right ventricular cardiomyopathy (ARVC)	7/75	0.0993329	0.587822	1.85796	4.29055	CACNG6;GJA1;CACNG8;SGCB;ACTN2;DSC2;CACNG4
Prolactin activation of MAPK signaling	7/75	0.0993329	0.587822	1.85796	4.29055	SOCS3;MYC;IRS2;PIK3R1;YWHAG;VAV1;JAK1
ABC transporters	5/47	0.0997104	0.587822	2.14751	4.95106	PEX19;ABCB7;ABCC5;ABCC9;ABCC10
Agrin in postsynaptic differentiation	5/47	0.0997104	0.587822	2.14751	4.95106	CDC42;MUSK;LAMB2;UTRN;RAPSN
TGF-beta regulation of extracellular matrix	37/565	0.10109	0.589921	1.2704	2.91143	ASAH1;HPN;MGST1;NEDD9;LPL;PLOD2;CCNC;PIK3R1;HNMT;ARHGAP6;CST6;ADH5;PTGS1;CDC42;MYC;LEPR;CYB5A;IL11;MBTPS1;CDKN2B;TAF13;FN1;ABCC9;ACSL3;ANK3;INHBA;MID1;CDC25A;COL4A2;LOX;PPA1;QPCT;ANG;CRYAB;CRK;SOS2;BCL2L1
Ephrin receptor A forward pathway	4/34	0.101638	0.589921	2.40445	5.49738	EPHA6;ARHGEF15;CRK;RHOA
N-cadherin signaling events	4/34	0.101638	0.589921	2.40445	5.49738	CDC42;GJA1;PIK3R1;RHOA
Ubiquitin-mediated proteolysis	11/136	0.103711	0.596044	1.58957	3.60221	SOCS3;UBE2H;UBE2D4;CBLC;NEDD4L;UBA1;BRCA1;SKP2;UBE2J2;MID1;PIAS2
BRCA1, BRCA2 and ATR roles in cancer susceptibility	3/22	0.10657	0.596044	2.84632	6.37276	TREX1;CHEK1;BRCA1
Nephrin interactions	3/22	0.10657	0.596044	2.84632	6.37276	ACTN2;MAGI2;PIK3R1
Chondroitin sulfate/dermatan sulfate metabolism	5/48	0.106756	0.596044	2.09746	4.69246	CHPF2;GPC3;GPC5;GPC6;ARSB
Lipid digestion, mobilization, and transport	5/48	0.106756	0.596044	2.09746	4.69246	LIPE;SAR1B;LPL;ABHD5;PRKACB
Presenilin action in Notch and Wnt signaling	5/48	0.106756	0.596044	2.09746	4.69246	TLE1;CSNK2A1;MYC;DTX1;NKD1
Interleukin-7 signaling pathway	4/35	0.110232	0.596044	2.32676	5.1309	MYC;PIK3R1;JAK1;BCL2L1
Bone mineralization regulation	2/11	0.111163	0.596044	4.00423	8.79633	COL4A2;COL4A1
CD28-dependent Vav1 pathway	2/11	0.111163	0.596044	4.00423	8.79633	CDC42;VAV1
Keratan sulfate degradation	2/11	0.111163	0.596044	4.00423	8.79633	KERA;FMOD
Methylation	2/11	0.111163	0.596044	4.00423	8.79633	COMT;HNMT
Reversal of insulin resistance by leptin	2/11	0.111163	0.596044	4.00423	8.79633	LEP;LEPR
Signaling by VEGF	2/11	0.111163	0.596044	4.00423	8.79633	FLT4;VEGFB
Sonic Hedgehog (SHH) receptor PTCH1 regulation of cell cycle	2/11	0.111163	0.596044	4.00423	8.79633	CDK1;CDC25A
Telomerase protein component gene hTERT transcriptional regulation	2/11	0.111163	0.596044	4.00423	8.79633	TERT;MYC
Vitamin C in the brain	2/11	0.111163	0.596044	4.00423	8.79633	COL4A2;COL4A1
Eicosanoid metabolism	3/23	0.117997	0.621062	2.70386	5.77841	EPHX1;PTGER3;PTGS1
Rho cell motility signaling pathway	3/23	0.117997	0.621062	2.70386	5.77841	BAIAP2;ARHGAP6;RHOA
Signaling events mediated by PRL	3/23	0.117997	0.621062	2.70386	5.77841	CCNE1;CDK2;RHOA
p75 neurotrophin receptor-mediated signaling	10/124	0.118568	0.621062	1.58391	3.37732	MAPK10;BDNF;PLEKHG5;ITSN1;PIK3R1;PRKACB;SOS2;RTN4;RHOA;VAV1
Phospholipids as signaling intermediaries	4/36	0.119138	0.621062	2.25393	4.79518	ASAH1;SMPD1;PIK3R1;RHOA
SNARE interactions in vesicular transport	4/36	0.119138	0.621062	2.25393	4.79518	GOSR1;VAMP4;USE1;STX11
Transmission across chemical synapses	14/190	0.128782	0.661608	1.4371	2.94553	GABRB2;KCNJ5;ACTN2;GNAI3;GRIK2;COMT;SYN1;DLG1;CACNG8;DLG3;ALDH2;AKAP9;PRKACB;CACNG4
Nucleotide G-protein coupled receptors (GPCRs)	2/12	0.128916	0.661608	3.60362	7.38234	P2RY6;P2RY2
Metabolism of vitamins and cofactors	5/51	0.129289	0.661608	1.96036	4.01031	CYB5A;MTHFD1;SHMT1;SLC19A3;MOCS1
Type I interferon (interferon-alpha/beta) pathway	5/51	0.129289	0.661608	1.96036	4.01031	PTPRS;PTPRZ1;PTPRA;PTPN4;JAK1
Ras-independent pathway in NK cell-mediated cytotoxicity	3/24	0.129854	0.661608	2.57497	5.2564	PIK3R1;VAV1;LAT
Epidermal growth factor receptor (EGFR) pathway	9/111	0.13074	0.663122	1.59271	3.24045	MAPK10;CBLC;SPRY2;PRKCQ;PIK3R1;SOS2;MAPK15;RHOA;VAV1
Lipid metabolism regulation by peroxisome proliferator-activated receptor alpha (PPAR-alpha)	9/112	0.135962	0.683451	1.57717	3.14705	FABP1;ACOX1;PEX11A;CCNC;TNFRSF21;SULT2A1;MED7;MED13L;TEAD3
S phase	9/112	0.135962	0.683451	1.57717	3.14705	PSMD12;PSMB5;PSMA1;CCNE1;MYC;CDK2;SKP2;CDC25A;PSMA8
Apoptotic execution phase	5/52	0.137244	0.683792	1.91855	3.81022	BCAP31;FNTA;STK24;PRKCQ;MAPT
Heparan sulfate/heparin glycosaminoglycan (HS-GAG) metabolism	5/52	0.137244	0.683792	1.91855	3.81022	EXT2;NAGLU;GPC3;GPC5;GPC6
APC/C-mediated degradation of cell cycle proteins	7/82	0.140318	0.692704	1.68393	3.30697	PSMD12;PSMB5;PSMA1;CDK2;CDK1;SKP2;PSMA8
C-Myc pathway	3/25	0.142109	0.692704	2.45779	4.79555	TRRAP;MYC;SKP2
Ghrelin pathway	3/25	0.142109	0.692704	2.45779	4.79555	AQP7;LPL;ACAT1
Ligand-gated ion channel transport	3/25	0.142109	0.692704	2.45779	4.79555	GABRB2;GLRB;HTR3A
TPO signaling pathway	3/25	0.142109	0.692704	2.45779	4.79555	CSNK2A1;MPL;PIK3R1
Calcium signaling pathway	13/178	0.146095	0.698292	1.42288	2.7369	CHRM2;RYR1;PTGER3;CALML3;PHKA1;PHKB;HTR5A;CACNA1G;GRM5;GNAQ;ITPKA;CHP1;PRKACB
Response to elevated platelet cytosolic calcium	7/83	0.146756	0.698292	1.66168	3.18874	FGB;FGA;ACTN2;LAMP2;FN1;VEGFB;CLU
T cell signal transduction	7/83	0.146756	0.698292	1.66168	3.18874	MAPK10;CBLC;PRKCQ;SOS2;MAPK15;VAV1;LAT
Interleukin-22 soluble receptor signaling pathway	2/13	0.147265	0.698292	3.27584	6.27494	SOCS3;JAK1
Signal attenuation	2/13	0.147265	0.698292	3.27584	6.27494	IRS2;CRK
Signaling events regulated by Ret tyrosine kinase	4/39	0.147596	0.698292	2.06041	3.94213	IRS2;PIK3R1;CRK;RHOA
Vitamin A and carotenoid metabolism	4/39	0.147596	0.698292	2.06041	3.94213	RBP4;ALDH1A1;LPL;RDH5
Transmembrane transport of small molecules	28/432	0.150327	0.708234	1.25381	2.37591	GABRB2;SLC26A1;SLC44A4;SLC20A2;ABCB7;SLC5A11;AQP7;ABCC10;SLC6A20;SLC7A2;HK1;ATP7B;PRKACB;ATP9B;SLC38A5;ATP6V1F;SLC12A4;SLC35A3;PEX19;ABCC5;SLC2A12;SLC39A10;HTR3A;ABCC9;GCK;G6PC2;GLRB;SLC26A7
CARM1 and regulation of the estrogen receptor	3/26	0.154729	0.714574	2.35081	4.38679	SPEN;HDAC5;BRCA1
Interleukin-9 regulation of target genes	3/26	0.154729	0.714574	2.35081	4.38679	SOCS3;MUC2;MYC
Segmentation clock	3/26	0.154729	0.714574	2.35081	4.38679	NOTCH2;CSNK2A1;NKD1
Tetrasaccharide linker sequence formation in glycosaminoglycan biosynthesis	3/26	0.154729	0.714574	2.35081	4.38679	GPC3;GPC5;GPC6
Phase I of biological oxidations: functionalization of compounds	6/69	0.154845	0.714574	1.71774	3.20415	ACSS2;ALDH2;ALDH1A1;CYP4F3;CYP46A1;PTGS1
Calcineurin-dependent NFAT signaling role in lymphocytes	5/55	0.162339	0.718758	1.80315	3.27825	CSNK2A1;CHP1;PRKCQ;YWHAG;BCL2L1
T cell receptor signaling in naive CD8+ T cells	5/55	0.162339	0.718758	1.80315	3.27825	CD8B;TRPV6;PRKCQ;VAV1;LAT
Pancreatic cancer	6/70	0.162358	0.718758	1.69081	3.07381	CDC42;MAPK10;VEGFB;PIK3R1;JAK1;BCL2L1
Renal cell carcinoma	6/70	0.162358	0.718758	1.69081	3.07381	CDC42;EGLN1;VEGFB;PIK3R1;CRK;SOS2
Calcium regulation in the cardiac cell	11/149	0.162606	0.718758	1.43884	2.61354	CHRM2;RYR1;KCNJ5;GJA1;RGS3;GNAQ;ANXA6;GNAI3;PRKCQ;PRKACB;YWHAG
GnRH signaling pathway	8/101	0.162664	0.718758	1.55201	2.81855	CDC42;MAPK10;GNAQ;GNRH2;CALML3;PLA2G5;PRKACB;SOS2
Protein processing in the endoplasmic reticulum	12/166	0.16599	0.718758	1.40671	2.52622	DNAJC3;BCAP31;MAPK10;MBTPS1;UBE2D4;SAR1B;WFS1;MAN1A1;STT3B;UBE2J2;SIL1;CRYAB
Coagulation common pathway	2/14	0.166098	0.718758	3.0027	5.39037	FGB;FGA
Interferon gamma signaling regulation	2/14	0.166098	0.718758	3.0027	5.39037	SOCS3;JAK1
Platelet amyloid precursor protein pathway	2/14	0.166098	0.718758	3.0027	5.39037	COL4A2;COL4A1
T cell receptor/JNK pathway	2/14	0.166098	0.718758	3.0027	5.39037	CRK;LAT
Progesterone-mediated oocyte maturation	7/86	0.16688	0.718758	1.59833	2.86177	MAPK10;CDK2;GNAI3;CDK1;PIK3R1;PRKACB;CDC25A
BAD phosphorylation regulation	3/27	0.167683	0.718758	2.25274	4.02267	PIK3R1;PRKACB;BCL2L1
Glucuronidation	3/27	0.167683	0.718758	2.25274	4.02267	UGT1A1;PGM1;HK1
Glycolysis	3/27	0.167683	0.718758	2.25274	4.02267	PFKFB3;PPP2R1B;HK1
Oxidative stress	3/27	0.167683	0.718758	2.25274	4.02267	MAPK10;CAT;MGST1
TWEAK regulation of gene expression	3/27	0.167683	0.718758	2.25274	4.02267	MMP16;MMP1;BCL2L1
Plasma membrane estrogen receptor signaling	4/41	0.167881	0.718758	1.94883	3.4777	GNAQ;GNAI3;PIK3R1;RHOA
Transcriptional activity of SMAD2/SMAD3-SMAD4 heterotrimer	4/41	0.167881	0.718758	1.94883	3.4777	CDKN2B;MYC;NEDD4L;CCNC
Mitochondrial pathway of apoptosis: multidomain Bcl-2 family	6/71	0.170024	0.725179	1.66471	2.94956	UBL5;CAPN7;PRKCQ;PARK7;CRYAB;BCL2L1
Signaling by NOTCH	9/119	0.175404	0.741196	1.47625	2.56966	NOTCH2;HDAC5;TLE1;AGO3;MYC;DTX1;TMED2;CCNC;ST3GAL3
Myocyte adrenergic pathway	6/72	0.177838	0.741196	1.6394	2.83106	RYR1;MAPK10;KCNJ5;ASAH1;GNAQ;PRKACB
Urokinase-type plasminogen activator (uPA) and uPAR-mediated signaling	4/42	0.178372	0.741196	1.89745	3.27097	FGB;FGA;FN1;CRK
Androgen receptor signaling, proteolysis, and transcription regulation	7/88	0.180935	0.741196	1.5587	2.66477	CDC42;CCNE1;RNF6;BRCA1;PARK7;PIK3R1;RHOA
Multi-step regulation of transcription by PITX2	3/28	0.180937	0.741196	2.16251	3.69705	CSNK2A1;TRRAP;NKD1
PTM: gamma carboxylation, hypusine formation and arylsulfatase activation	3/28	0.180937	0.741196	2.16251	3.69705	ARSA;ARSG;ARSB
G alpha s pathway	9/120	0.181429	0.741196	1.46288	2.49697	MAPK10;PYGB;RGS3;PHKA1;PHKB;PDE7A;PDE8A;PRKACB;MAPK15
AKAP95 role in mitosis and chromosome dynamics	2/15	0.185313	0.741196	2.77157	4.67206	CDK1;PRKACB
Activation of IRF3/IRF7 mediated by TBK1/IKK epsilon	2/15	0.185313	0.741196	2.77157	4.67206	IRF7;TLR4
Arf6 vesicle-mediated transport	2/15	0.185313	0.741196	2.77157	4.67206	ARF1;RHOA
Cyclin A/B1-associated events during G2/M transition	2/15	0.185313	0.741196	2.77157	4.67206	CDK1;CDC25A
Extrinsic prothrombin activation pathway	2/15	0.185313	0.741196	2.77157	4.67206	FGB;FGA
Fatty acid omega oxidation	2/15	0.185313	0.741196	2.77157	4.67206	ALDH2;ALDH1A1
Mu-calpain pathway	2/15	0.185313	0.741196	2.77157	4.67206	ACTN2;RHOA
Repression of pain sensation by the transcriptional regulator DREAM	2/15	0.185313	0.741196	2.77157	4.67206	KCNIP3;PRKACB
Chronic myeloid leukemia	6/73	0.185793	0.741196	1.61485	2.71799	MYC;CBLC;PIK3R1;CRK;SOS2;BCL2L1
T cell receptor regulation of apoptosis	37/603	0.187734	0.741196	1.18266	1.97827	PSMD12;SHMT1;ITSN1;COPS7B;ILK;LSP1;BRCA1;CLU;IL27RA;STRN3;CDC42;MRPL3;MYC;PALM;CASP4;TLK2;TRIM24;LGALS8;MAP4K5;MCL1;SERPINB1;ANXA1;EGR3;FEM1B;TREX1;TNFRSF10B;DHCR24;OPRM1;TFCP2;PAX8;PPA1;CCNE1;PSPC1;CDK2;GNRH2;IRF7;PDE7A
Fibroblast growth factor receptor pathway	8/105	0.188475	0.741196	1.48769	2.48265	MAPK10;CBLC;SPRY2;PRKCQ;PIK3R1;FGF1;SOS2;MAPK15
Beta-3 integrin cell surface interactions	4/43	0.189078	0.741196	1.8487	3.07918	FGB;FGA;COL4A1;FN1
Cell differentiation by G alpha (i/o) pathway inferred from mouse Neuro2A model	4/43	0.189078	0.741196	1.8487	3.07918	ASAH1;ILK;PRKACB;CRK
PI3K class IB pathway in neutrophils	4/43	0.189078	0.741196	1.8487	3.07918	PRKCQ;PRKACB;RHOA;VAV1
Arachidonic acid metabolism	5/58	0.18911	0.741196	1.70081	2.83258	CBR1;GPX1;CYP4F3;PLA2G5;PTGS1
Neuroactive ligand-receptor interaction	18/272	0.189427	0.741196	1.2799	2.12944	CHRM2;GABRB2;THRA;PTGER3;MLNR;GRIK2;OPRM1;HTR5A;CRHR1;GRM5;P2RY6;GRIN3A;GLRB;P2RY2;LEP;LEPR;GABRE;DRD3
Adherens junction cell adhesion	6/74	0.193884	0.741196	1.59102	2.61005	CDC42;CSNK2A1;ACTN2;SORBS1;BAIAP2;RHOA
BARD1 signaling events	3/29	0.194461	0.741196	2.07923	3.40479	CCNE1;CDK2;BRCA1
IGF1 pathway	3/29	0.194461	0.741196	2.07923	3.40479	IRS2;PIK3R1;CRK
Integrin beta-2 pathway	3/29	0.194461	0.741196	2.07923	3.40479	FGB;FGA;ITGAD
Matrix metalloproteinases	3/29	0.194461	0.741196	2.07923	3.40479	MMP16;MMP26;MMP1
Reelin signaling pathway	3/29	0.194461	0.741196	2.07923	3.40479	LRPAP1;PIK3R1;MAPT
Gap junction pathway	7/90	0.195467	0.741196	1.52097	2.48278	GJA1;GRM5;GNAQ;GNAI3;CDK1;PRKACB;SOS2
Amine-derived hormones	2/16	0.204818	0.741196	2.57347	4.08058	DDC;AANAT
Control of cell cycle and breast tumor growth by estrogen-responsive protein Efp	2/16	0.204818	0.741196	2.57347	4.08058	CDK2;CDK1
DNA-PK pathway in nonhomologous end joining	2/16	0.204818	0.741196	2.57347	4.08058	DCLRE1C;CSNK2A1
Interleukin-9 signaling pathway	2/16	0.204818	0.741196	2.57347	4.08058	PIK3R1;JAK1
N-glycan precursor substrate biosynthesis	2/16	0.204818	0.741196	2.57347	4.08058	DPM1;GFPT1
Nucleotide-like (purinergic) G-protein coupled receptors	2/16	0.204818	0.741196	2.57347	4.08058	P2RY6;P2RY2
Sonic Hedgehog (Shh) pathway	2/16	0.204818	0.741196	2.57347	4.08058	DYRK1A;PRKACB
Natural killer cell receptor signaling pathway	5/60	0.207773	0.741196	1.63879	2.57505	MAPK10;SOS2;MAPK15;VAV1;LAT
RAGE pathway	5/60	0.207773	0.741196	1.63879	2.57505	GJA1;MMP1;FN1;REN;TLR4
Activation of kainate receptors upon glutamate binding	3/30	0.208222	0.741196	2.00212	3.14162	DLG1;DLG3;GRIK2
Glutamate binding and activation of AMPA receptors and synaptic plasticity	3/30	0.208222	0.741196	2.00212	3.14162	CACNG8;DLG1;CACNG4
Inactivation of GSK3 by Akt causes accumulation of beta-catenin in alveolar macrophages	3/30	0.208222	0.741196	2.00212	3.14162	GJA1;CSNK2A1;PIK3R1
Nectin adhesion pathway	3/30	0.208222	0.741196	2.00212	3.14162	CDC42;PIK3R1;CRK
Nuclear events mediated by MAP kinases	3/30	0.208222	0.741196	2.00212	3.14162	MAPK10;ATF2;PPP2R1B
Ovarian infertility genes	3/30	0.208222	0.741196	2.00212	3.14162	VDR;SMPD1;MSH5
PDGFA signaling pathway	3/30	0.208222	0.741196	2.00212	3.14162	CSNK2A1;PIK3R1;JAK1
Signaling by FGFR1 mutants	3/30	0.208222	0.741196	2.00212	3.14162	TRIM24;PIK3R1;FGF1
Tumor necrosis factor (TNF) pathway	3/30	0.208222	0.741196	2.00212	3.14162	MAPK10;BAG4;AGFG1
Actin cytoskeleton regulation	15/226	0.212674	0.741196	1.28318	1.98636	CHRM2;ACTN2;FN1;RRAS2;PIK3R1;FGF1;BAIAP2;RHOA;VAV1;CDC42;ITGAD;GNA12;PIK3C3;CRK;SOS2
Ion channel transport	5/61	0.217323	0.741196	1.60944	2.45661	GABRB2;ATP7B;GLRB;HTR3A;ATP9B
Extracellular matrix organization	7/93	0.218086	0.741196	1.46768	2.23509	COL4A2;MMP16;PCOLCE2;COL25A1;MMP1;COL4A1;PLOD2
Amino acid transport across the plasma membrane	3/31	0.222191	0.741196	1.93051	2.90391	SLC6A20;SLC7A2;SLC38A5
CD28 co-stimulation	3/31	0.222191	0.741196	1.93051	2.90391	CDC42;PIK3R1;VAV1
CD40/CD40L signaling	3/31	0.222191	0.741196	1.93051	2.90391	MAPK10;MYC;BCL2L1
One-carbon metabolism	3/31	0.222191	0.741196	1.93051	2.90391	MTRR;MTHFD1;SHMT1
RhoA activity regulation	4/46	0.22232	0.741196	1.71637	2.58081	ARHGEF15;ARHGAP6;RHOA;VAV1
Developmental biology	26/420	0.22299	0.741196	1.19212	1.78893	LPL;CCNC;CACNA1G;CDC42;ACVR1C;SCN3B;SCN3A;SCN1B;CSNK2A1;CNTN6;ANK2;ANK3;RHOA;GCK;MED7;MED13L;DLG1;COL4A2;DLG3;PTPRA;COL4A1;LEP;CDK1;PRKCQ;SCN2A;SOS2
Antigen-activated B-cell receptor generation of second messengers	14/211	0.223023	0.741196	1.28247	1.92432	ATF2;CSNK2A1;PIK3R1;MAPK15;VAV1;CDC42;MAPK10;BCL6;MYC;CHP1;PRKCQ;CRK;SOS2;GTF2I
Atypical NF-kappaB pathway	2/17	0.224529	0.741196	2.40178	3.58766	CSNK2A1;PIK3R1
Chylomicron-mediated lipid transport	2/17	0.224529	0.741196	2.40178	3.58766	SAR1B;LPL
Estrogen metabolism	2/17	0.224529	0.741196	2.40178	3.58766	UGT1A1;COMT
Eukaryotic protein translation	2/17	0.224529	0.741196	2.40178	3.58766	EIF1AX;EIF4G2
PIP biosynthesis at the Golgi membrane	2/17	0.224529	0.741196	2.40178	3.58766	ARF1;PIK3C3
Renin-angiotensin system	2/17	0.224529	0.741196	2.40178	3.58766	LNPEP;REN
SHC1 events in EGFR signaling	2/17	0.224529	0.741196	2.40178	3.58766	CDK1;IRS2
Synaptic proteins at the synaptic junction	2/17	0.224529	0.741196	2.40178	3.58766	DLG1;DLG3
Unblocking of NMDA receptor, glutamate binding and activation	2/17	0.224529	0.741196	2.40178	3.58766	ACTN2;AKAP9
Colorectal cancer	5/62	0.227006	0.741196	1.58112	2.34446	MAPK10;MYC;PIK3R1;RHOA;APPL1
Transport of inorganic cations/anions and amino acids/oligopeptides	7/95	0.233661	0.741196	1.43418	2.08513	SLC12A4;SLC26A1;SLC20A2;SLC26A7;SLC6A20;SLC7A2;SLC38A5
Actions of nitric oxide in the heart	4/47	0.233725	0.741196	1.67637	2.43679	FLT4;GNAQ;PIK3R1;PRKACB
Regulation of transcription by NOTCH1 intracellular domain	4/47	0.233725	0.741196	1.67637	2.43679	HDAC5;TLE1;MYC;CCNC
Fc epsilon receptor I signaling pathway	6/79	0.236176	0.741196	1.48165	2.13828	MAPK10;PIK3R1;PLA2G5;SOS2;VAV1;LAT
Alanine, aspartate and glutamate metabolism	3/32	0.236339	0.741196	1.86384	2.68857	ALDH4A1;GFPT1;AGXT
Netrin-mediated signaling events	3/32	0.236339	0.741196	1.86384	2.68857	CDC42;PIK3R1;RHOA
O-linked glycosylation of mucins	5/63	0.236812	0.741196	1.55378	2.2382	B3GNT8;MUC2;GCNT3;GALNTL6;ST3GAL3
ATM-mediated phosphorylation of repair proteins	1/5	0.236972	0.741196	4.50166	6.48155	BRCA1
Axonal growth stimulation	1/5	0.236972	0.741196	4.50166	6.48155	RHOA
CREB phosphorylation through the activation of adenylate cyclase	1/5	0.236972	0.741196	4.50166	6.48155	PRKACB
Cytochrome P450 metabolism of eicosanoids	1/5	0.236972	0.741196	4.50166	6.48155	CYP4F3
Dopamine receptors	1/5	0.236972	0.741196	4.50166	6.48155	DRD3
ERK activation	1/5	0.236972	0.741196	4.50166	6.48155	CDK1
FGFR1b ligand binding and activation	1/5	0.236972	0.741196	4.50166	6.48155	FGF1
Folate-alcohol and cancer pathway	1/5	0.236972	0.741196	4.50166	6.48155	ALDH1A1
G-protein signaling through tubby proteins	1/5	0.236972	0.741196	4.50166	6.48155	GNAQ
G2 phase pathway	1/5	0.236972	0.741196	4.50166	6.48155	CDK2
Glyoxylate metabolism	1/5	0.236972	0.741196	4.50166	6.48155	AGXT
Heme degradation	1/5	0.236972	0.741196	4.50166	6.48155	UGT1A1
Insulin receptor substrate (IRS) activation	1/5	0.236972	0.741196	4.50166	6.48155	IRS2
Ion channel and phorbal esters signaling pathway	1/5	0.236972	0.741196	4.50166	6.48155	P2RY2
Maturation of Notch precursor via proteolytic cleavage	1/5	0.236972	0.741196	4.50166	6.48155	NOTCH2
Muscarinic acetylcholine receptors	1/5	0.236972	0.741196	4.50166	6.48155	CHRM2
N-glycan trimming and elongation in the cis-Golgi	1/5	0.236972	0.741196	4.50166	6.48155	MAN1A1
PKA-mediated phosphorylation of key metabolic factors	1/5	0.236972	0.741196	4.50166	6.48155	PRKACB
Polo-like kinase 3 (PLK3) pathway	1/5	0.236972	0.741196	4.50166	6.48155	CCNE1
Sodium-coupled phosphate cotransporters	1/5	0.236972	0.741196	4.50166	6.48155	SLC20A2
UDP-N-acetyl-glucosamine biosynthesis	1/5	0.236972	0.741196	4.50166	6.48155	GFPT1
Botulinum neurotoxicity	2/18	0.24437	0.750466	2.25155	3.17259	STX12;STX11
CDK regulation of DNA replication	2/18	0.24437	0.750466	2.25155	3.17259	CCNE1;CDK2
Corticosteroids and cardioprotection	2/18	0.24437	0.750466	2.25155	3.17259	ANXA1;PIK3R1
Fatty acyl-CoA biosynthesis	2/18	0.24437	0.750466	2.25155	3.17259	ACSL4;ACSL3
Oocyte meiosis	8/113	0.244692	0.750466	1.37376	1.93392	PPP2R1B;CCNE1;CDK2;CDK1;CHP1;CALML3;PRKACB;YWHAG
mTOR signaling pathway	8/113	0.244692	0.750466	1.37376	1.93392	RRAGC;CCNE1;CDK2;VEGFB;PIK3R1;EIF4G2;YWHAG;RHOA
Diurnally regulated genes with circadian orthologs	4/48	0.245268	0.750466	1.63818	2.30231	RBPMS;STBD1;QKI;EIF4G2
Post-translational regulation of adherens junction stability and disassembly	4/48	0.245268	0.750466	1.63818	2.30231	CDC42;NTRK2;BDNF;GNA12
Angiotensin II-stimulated signaling through G-proteins and beta-arrestin	5/64	0.246733	0.750868	1.52736	2.13747	MAPK10;GNAQ;PRKCQ;MAPK15;RHOA
Collagen biosynthesis and modifying enzymes	5/64	0.246733	0.750868	1.52736	2.13747	COL4A2;PCOLCE2;COL25A1;COL4A1;PLOD2
Retinol metabolism	5/65	0.256759	0.769132	1.50183	2.04191	UGT1A1;ALDH1A1;RDH5;DHRS4L2;ADH5
Angiopoietin receptor Tie2-mediated signaling	4/49	0.256933	0.769132	1.60169	2.17661	ELF1;FN1;PIK3R1;CRK
Ceramide signaling pathway	4/49	0.256933	0.769132	1.60169	2.17661	ASAH1;BAG4;MYC;SMPD1
G alpha 12 pathway	4/49	0.256933	0.769132	1.60169	2.17661	MAPK10;MAPK15;RHOA;VAV1
Interleukin-5 signaling pathway	4/49	0.256933	0.769132	1.60169	2.17661	MYC;MAPT;PIK3R1;JAK1
Alpha-linolenic acid metabolism	2/19	0.264274	0.769132	2.11899	2.81989	ACOX1;PLA2G5
FRS2-mediated activation	2/19	0.264274	0.769132	2.11899	2.81989	CDK1;CRK
G-protein-independent seven transmembrane receptor signaling	2/19	0.264274	0.769132	2.11899	2.81989	MAPK10;MAPK15
Glycosaminoglycan degradation	2/19	0.264274	0.769132	2.11899	2.81989	NAGLU;ARSB
IGF-1 receptor and longevity	2/19	0.264274	0.769132	2.11899	2.81989	CAT;PIK3R1
MAL role in Rho-mediated activation of SRF	2/19	0.264274	0.769132	2.11899	2.81989	CDC42;RHOA
PTEN-dependent cell cycle arrest and apoptosis	2/19	0.264274	0.769132	2.11899	2.81989	ILK;PIK3R1
Ras activation upon calcium influx through NMDA receptor	2/19	0.264274	0.769132	2.11899	2.81989	ACTN2;AKAP9
Signaling by FGFR1 fusion mutants	2/19	0.264274	0.769132	2.11899	2.81989	TRIM24;PIK3R1
TP53 network	2/19	0.264274	0.769132	2.11899	2.81989	GADD45A;MYC
Telomeres, telomerase, cellular aging, and immortality	2/19	0.264274	0.769132	2.11899	2.81989	TERT;MYC
Senescence and autophagy	7/99	0.265838	0.769132	1.37153	1.81709	GABARAPL1;MAP1LC3B;LAMP2;FN1;IRF7;PIK3C3;INHBA
Beta-1 integrin cell surface interactions	5/66	0.26688	0.769132	1.47713	1.95122	FGB;FGA;COL4A1;LAMB2;FN1
Retinoblastoma protein regulation	5/66	0.26688	0.769132	1.47713	1.95122	ATF2;ELF1;CCNE1;CDK2;SKP2
Signaling by TGF-beta receptor complex	5/66	0.26688	0.769132	1.47713	1.95122	CDKN2B;MYC;NEDD4L;CCNC;RHOA
Vascular smooth muscle contraction	8/116	0.267079	0.769132	1.33539	1.763	NPR1;GNAQ;GNA12;CALML3;PRKCQ;PLA2G5;PRKACB;RHOA
Integrin-mediated cell adhesion	7/100	0.274069	0.774385	1.35671	1.75609	CDC42;MAPK10;ITGAD;CAPN7;ILK;SORBS1;CRK
Leukocyte transendothelial migration	8/117	0.274671	0.774385	1.32307	1.70964	CDC42;ACTN2;CLDN8;GNAI3;PIK3R1;CD99;RHOA;VAV1
T cell receptor signaling in naive CD4+ T cells	5/67	0.277088	0.774385	1.45323	1.8651	CDC42;TRPV6;PRKCQ;VAV1;LAT
Activation of TRKA receptors	1/6	0.277155	0.774385	3.60114	4.6209	NTRK2
FGFR2b ligand binding and activation	1/6	0.277155	0.774385	3.60114	4.6209	FGF1
Fas signaling pathway in hepatocytes	1/6	0.277155	0.774385	3.60114	4.6209	SMPD1
G beta-gamma signaling through PI3K gamma	1/6	0.277155	0.774385	3.60114	4.6209	RHOA
Molybdenum cofactor biosynthesis	1/6	0.277155	0.774385	3.60114	4.6209	MOCS1
Phosphorylation of Emi1	1/6	0.277155	0.774385	3.60114	4.6209	CDK1
Pre-NOTCH Processing in the endoplasmic reticulum	1/6	0.277155	0.774385	3.60114	4.6209	NOTCH2
Small interfering RNA (siRNA) biogenesis	1/6	0.277155	0.774385	3.60114	4.6209	AGO3
Telomere extension by telomerase	1/6	0.277155	0.774385	3.60114	4.6209	TERT
Basal transcription factors	3/35	0.27957	0.779196	1.68884	2.15243	TAF13;GTF2E2;GTF2I
Nuclear receptor transcription pathway	4/51	0.28057	0.780054	1.53338	1.94881	THRA;VDR;NR2E1;NR2C1
TNF-alpha signaling pathway	7/101	0.282366	0.782358	1.34221	1.69729	BAG4;CSNK2A1;SMPD1;MAP4K5;RFFL;MAP4K3;BCL2L1
4-1BB-dependent immune response	2/20	0.284178	0.782358	2.00116	2.51777	ATF2;MAP4K5
Nerve growth factor (NGF) pathway	2/20	0.284178	0.782358	2.00116	2.51777	CSNK2A1;PIK3R1
Peroxisomal lipid metabolism	2/20	0.284178	0.782358	2.00116	2.51777	ACOX1;CRAT
Activation of NF-kappaB in B cells	5/68	0.287374	0.789227	1.43009	1.78328	PSMD12;PSMB5;PSMA1;CDK2;PSMA8
Myc active pathway	6/85	0.290136	0.792944	1.36868	1.69362	TERT;TRRAP;MYC;PEG10;SHMT1;CDC25A
TGF-beta regulation of skeletal system development	6/85	0.290136	0.792944	1.36868	1.69362	CDKN2B;ACVR1C;PPP2R1B;MYC;INHBA;RHOA
Endometrial cancer	4/52	0.292514	0.794283	1.50135	1.84552	MYC;ILK;PIK3R1;SOS2
Pyruvate metabolism	4/52	0.292514	0.794283	1.50135	1.84552	ACSS2;ALDH2;DLD;ACAT1
Transport to the Golgi and subsequent modification	3/36	0.294154	0.794283	1.63758	2.00382	SAR1B;MAN1A1;B4GALT6
Adrenergic pathway	9/137	0.295758	0.794283	1.26744	1.54402	MAPK10;KCNJ5;RGS3;GNAQ;PRKCQ;PDE7A;PDE8A;PRKACB;MAPK15
Glycerophospholipid biosynthesis	6/86	0.29938	0.794283	1.3515	1.62997	PCYT1B;PHOSPHO1;LPGAT1;SLC44A4;PLA2G5;CRLS1
APC/C activator regulation between G1/S and early anaphase	2/21	0.304028	0.794283	1.89574	2.25714	CDK2;CDK1
Biosynthesis of unsaturated fatty acids	2/21	0.304028	0.794283	1.89574	2.25714	PECR;ACOX1
ChREBP regulation by carbohydrates and cAMP	2/21	0.304028	0.794283	1.89574	2.25714	ACSBG1;PRKACB
E-cadherin keratinocyte pathway	2/21	0.304028	0.794283	1.89574	2.25714	PIK3R1;RHOA
IGF1 signaling pathway	2/21	0.304028	0.794283	1.89574	2.25714	CSNK2A1;PIK3R1
Nicotine activity on dopaminergic neurons	2/21	0.304028	0.794283	1.89574	2.25714	DDC;DRD3
S1P/S1P1 pathway	2/21	0.304028	0.794283	1.89574	2.25714	GNAI3;RHOA
p38 MK2 pathway	2/21	0.304028	0.794283	1.89574	2.25714	LSP1;YWHAG
Amyotrophic lateral sclerosis (ALS)	4/53	0.304523	0.794283	1.47063	1.7486	GPX1;CAT;CHP1;BCL2L1
PI3K pathway	4/53	0.304523	0.794283	1.47063	1.7486	IRS2;PRKCQ;PIK3R1;SOS2
Thrombin signaling through protease-activated receptors	4/53	0.304523	0.794283	1.47063	1.7486	GNAQ;GNA12;PIK3R1;RHOA
Chagas disease	7/104	0.307597	0.794283	1.30049	1.53323	MAPK10;PPP2R1B;PPP2R2C;GNAQ;GNAI3;PIK3R1;TLR4
CDC42 signaling events	5/70	0.308141	0.794283	1.38594	1.63152	CDC42;ATF2;DLG1;PIK3R1;BAIAP2
Long-term potentiation	5/70	0.308141	0.794283	1.38594	1.63152	GRM5;GNAQ;CHP1;CALML3;PRKACB
NCAM signaling for neurite out-growth	5/70	0.308141	0.794283	1.38594	1.63152	COL4A2;COL4A1;PTPRA;CDK1;CACNA1G
Activation of NMDA receptor upon glutamate binding and postsynaptic events	3/37	0.308785	0.794283	1.58933	1.86764	ACTN2;AKAP9;PRKACB
PI3K/AKT activation	3/37	0.308785	0.794283	1.58933	1.86764	IRS2;PIK3R1;RHOA
Metapathway biotransformation	11/174	0.309991	0.794283	1.21654	1.42482	NAA50;NAT8;UGT1A1;CYP4F3;EPHX1;MGST1;GLYAT;COMT;CYP46A1;HNMT;SULT2A1
Activation of PKC through G-protein coupled receptors	1/7	0.315225	0.794283	3.00079	3.46432	GNAQ
Anandamide metabolism	1/7	0.315225	0.794283	3.00079	3.46432	FAAH
Cation-coupled chloride cotransporters	1/7	0.315225	0.794283	3.00079	3.46432	SLC12A4
Cyanoamino acid metabolism	1/7	0.315225	0.794283	3.00079	3.46432	SHMT1
FGFR3b ligand binding and activation	1/7	0.315225	0.794283	3.00079	3.46432	FGF1
Inactivation of BCL-2 by BH3-only proteins	1/7	0.315225	0.794283	3.00079	3.46432	BCL2L1
Internal ribosome entry pathway	1/7	0.315225	0.794283	3.00079	3.46432	EIF4G2
Nef-mediated CD8 downregulation	1/7	0.315225	0.794283	3.00079	3.46432	CD8B
PP2A-mediated dephosphorylation of key metabolic factors	1/7	0.315225	0.794283	3.00079	3.46432	PPP2R1B
Post-transcriptional silencing by small RNAs	1/7	0.315225	0.794283	3.00079	3.46432	AGO3
Kit receptor signaling pathway	4/54	0.316582	0.794283	1.44114	1.65756	MAPT;PIK3R1;CRK;VAV1
HIF-1 degradation in normoxia	6/88	0.318026	0.794283	1.3184	1.51039	MAPK10;PSMD12;PSMB5;PSMA1;MAPK15;PSMA8
Rac1 cell motility signaling pathway	5/71	0.318604	0.794283	1.36487	1.56114	ATF2;PIK3R1;BAIAP2;CRK;VAV1
Neuronal system	17/283	0.322596	0.794283	1.15241	1.30378	GABRB2;STX12;KCNJ5;ACTN2;GNAI3;ABCC9;GRIK2;COMT;SYN1;STX11;DLG1;CACNG8;DLG3;ALDH2;AKAP9;PRKACB;CACNG4
Cyclin D-associated events in G1	3/38	0.323438	0.794283	1.54384	1.7426	CDKN2B;PPP2R1B;SKP2
Nuclear receptors	3/38	0.323438	0.794283	1.54384	1.7426	THRA;VDR;NR2E1
Signaling events mediated by HDAC class II	3/38	0.323438	0.794283	1.54384	1.7426	HDAC5;BCL6;GATA1
Trefoil factor initiation of mucosal healing	3/38	0.323438	0.794283	1.54384	1.7426	MUC2;PIK3R1;RHOA
CCR3 signaling in eosinophils	2/22	0.323773	0.794283	1.80086	2.03085	GNAQ;RHOA
RNA polymerase II promoter escape	2/22	0.323773	0.794283	1.80086	2.03085	TAF13;GTF2E2
ERBB1 downstream pathway	7/106	0.324655	0.794283	1.27408	1.43333	CDC42;ATF2;PIK3R1;RIN1;BAIAP2;YWHAG;BCL2L1
Toll receptor cascades	10/159	0.327775	0.794283	1.2096	1.34922	MAPK10;ATF2;UBE2H;UBE2D4;PPP2R1B;CDK1;IRF7;PIK3C3;UBE2J2;TLR4
Vibrio cholerae infection	4/55	0.32868	0.794283	1.41281	1.572	ARF1;MUC2;PRKACB;ATP6V1F
Interleukin-4 regulation of apoptosis	16/267	0.333069	0.794283	1.14925	1.2635	CPM;ANXA1;VDR;FN1;LPL;INHBA;POU4F1;CDC25A;DNAJC3;CD8B;LOX;BCL6;TMEM259;MYC;COBLL1;TLR4
G13 signaling pathway	3/39	0.338091	0.794283	1.50087	1.62761	CDC42;MAPK10;RHOA
HIV-1 transcription initiation	3/39	0.338091	0.794283	1.50087	1.62761	TAF13;GTF2E2;POLR2L
Degradation of beta-catenin by the destruction complex	5/73	0.339647	0.794283	1.32458	1.43035	PSMD12;PSMB5;PPP2R1B;PSMA1;PSMA8
Signaling by NOTCH1	5/73	0.339647	0.794283	1.32458	1.43035	HDAC5;TLE1;MYC;DTX1;CCNC
Thromboxane A2 receptor signaling	4/56	0.340802	0.794283	1.38557	1.4915	GNAQ;GNA12;PRKCQ;RHOA
G alpha i pathway	7/108	0.34186	0.794283	1.24872	1.34032	CHRM2;MAPK10;KCNJ5;RGS3;PRKCQ;SOS2;MAPK15
BAD phosphorylation mediated by IGF1R signaling	2/23	0.343371	0.794283	1.71501	1.83325	PIK3R1;PRKACB
Blood clotting cascade	2/23	0.343371	0.794283	1.71501	1.83325	FGB;FGA
CREB transcription factor and its extracellular signals	2/23	0.343371	0.794283	1.71501	1.83325	PIK3R1;PRKACB
Collagen binding in corneal epithelia mediated by Erk and PI-3 Kinase	2/23	0.343371	0.794283	1.71501	1.83325	PIK3R1;RHOA
Interleukin-11 pathway	2/23	0.343371	0.794283	1.71501	1.83325	SOCS3;STX11
Post-elongation processing of intronless pre-mRNA	2/23	0.343371	0.794283	1.71501	1.83325	LSM10;CPSF7
Progesterone-initiated oocyte maturation	2/23	0.343371	0.794283	1.71501	1.83325	CDK1;PRKACB
Signaling events mediated by the hedgehog family	2/23	0.343371	0.794283	1.71501	1.83325	LRPAP1;PIK3R1
Visual signal transduction: cones	2/23	0.343371	0.794283	1.71501	1.83325	RDH5;GUCA1C
Visual signal transduction: rods	2/23	0.343371	0.794283	1.71501	1.83325	RDH5;GUCA1C
SLC-mediated transmembrane transport	15/251	0.344181	0.794283	1.14572	1.22201	SLC12A4;SLC44A4;SLC26A1;SLC35A3;SLC20A2;SLC2A12;SLC5A11;SLC39A10;SLC6A20;SLC7A2;GCK;HK1;G6PC2;SLC26A7;SLC38A5
Gastric acid secretion	5/74	0.35021	0.794283	1.30532	1.36957	GNAQ;GNAI3;SLC26A7;CALML3;PRKACB
Integrins in angiogenesis	5/74	0.35021	0.794283	1.30532	1.36957	COL4A1;FN1;ILK;PIK3R1;RHOA
Seven transmembrane receptor signaling through beta-arrestin	5/74	0.35021	0.794283	1.30532	1.36957	MAPK10;PDE7A;PDE8A;MAPK15;RHOA
Signaling by insulin receptor	7/109	0.350505	0.794283	1.23641	1.29623	CDK1;IRS2;PIK3C3;PIK3R1;FGF1;CRK;ATP6V1F
Signaling by interleukins	7/109	0.350505	0.794283	1.23641	1.29623	SOCS3;CDK1;PIK3R1;PRKACB;CRK;VAV1;JAK1
Aflatoxin B1 metabolism	1/8	0.351291	0.794283	2.57197	2.69065	EPHX1
BRCA1-dependent ubiquitin ligase activity	1/8	0.351291	0.794283	2.57197	2.69065	BRCA1
Beta-oxidation of pristanoyl-CoA	1/8	0.351291	0.794283	2.57197	2.69065	CRAT
Binding of RNA by insulin-like growth factor 2 mRNA binding proteins (IGF2BPs/IMPs/VICKZs)	1/8	0.351291	0.794283	2.57197	2.69065	MYC
CHL1 interactions	1/8	0.351291	0.794283	2.57197	2.69065	CNTN6
Codeine and morphine metabolism	1/8	0.351291	0.794283	2.57197	2.69065	UGT1A1
Formyl peptide interaction with formyl peptide receptors	1/8	0.351291	0.794283	2.57197	2.69065	ANXA1
Insulin secretion regulation by fatty acids bound to GPR40 (FFAR1)	1/8	0.351291	0.794283	2.57197	2.69065	GNAQ
Mechanism of acetaminophen activity and toxicity	1/8	0.351291	0.794283	2.57197	2.69065	PTGS1
Recruitment of repair and signaling proteins to double-strand breaks	1/8	0.351291	0.794283	2.57197	2.69065	BRCA1
Relaxin receptors	1/8	0.351291	0.794283	2.57197	2.69065	RLN3
SREBP control of lipid biosynthesis	1/8	0.351291	0.794283	2.57197	2.69065	MBTPS1
Sema4D-mediated inhibition of cell attachment and migration	1/8	0.351291	0.794283	2.57197	2.69065	RHOA
Transport of nucleotide sugars	1/8	0.351291	0.794283	2.57197	2.69065	SLC35A3
Visceral fat deposits and the metabolic syndrome	1/8	0.351291	0.794283	2.57197	2.69065	LPL
Vitamin C (ascorbate) metabolism	1/8	0.351291	0.794283	2.57197	2.69065	CYB5A
Vitamin D biosynthesis	1/8	0.351291	0.794283	2.57197	2.69065	VDR
PAC1 receptor pathway	3/40	0.352724	0.794814	1.46023	1.52166	GNAQ;PRKCQ;PRKACB
Pre-NOTCH expression and processing	4/57	0.352937	0.794814	1.35935	1.41572	NOTCH2;AGO3;TMED2;ST3GAL3
Cholesterol biosynthesis	2/24	0.362782	0.805705	1.63697	1.65981	DHCR24;LSS
Endogenous Toll-like receptor signaling	2/24	0.362782	0.805705	1.63697	1.65981	TLR4;RHOA
Inhibition of cellular proliferation by Gleevec	2/24	0.362782	0.805705	1.63697	1.65981	MYC;PIK3R1
SREBP signaling	2/24	0.362782	0.805705	1.63697	1.65981	MBTPS1;SAR1B
Signal transduction of S1P receptor	2/24	0.362782	0.805705	1.63697	1.65981	ASAH1;GNAI3
Triacylglyceride biosynthesis	2/24	0.362782	0.805705	1.63697	1.65981	LIPE;LPL
Tumor suppressor Arf inhibits ribosomal biogenesis	2/24	0.362782	0.805705	1.63697	1.65981	MYC;PIK3R1
Autodegradation of Cdh1 by Cdh1-APC/C	4/58	0.365072	0.809196	1.33411	1.34433	PSMD12;PSMB5;PSMA1;CDK2
Tyrosine metabolism	3/41	0.367317	0.811264	1.42173	1.4239	DDC;COMT;ADH5
ERBB signaling pathway	6/94	0.374775	0.811264	1.22812	1.20531	MAPK10;MYC;CBLC;PIK3R1;CRK;SOS2
Signaling by NGF	13/221	0.381004	0.811264	1.12614	1.08666	NTRK2;PLEKHG5;ITSN1;IRS2;PIK3R1;RHOA;VAV1;RTN4;PPP2R1B;CDK1;PRKACB;CRK;SOS2
Aldosterone-regulated sodium reabsorption	3/42	0.381851	0.811264	1.3852	1.33357	NEDD4L;IRS2;PIK3R1
Amine ligand-binding G-protein coupled receptors	3/42	0.381851	0.811264	1.3852	1.33357	CHRM2;HTR5A;DRD3
Bladder cancer	3/42	0.381851	0.811264	1.3852	1.33357	MMP1;MYC;VEGFB
Eukaryotic transcription initiation	3/42	0.381851	0.811264	1.3852	1.33357	TAF13;ILK;GTF2E2
Hexose transport	3/42	0.381851	0.811264	1.3852	1.33357	G6PC2;GCK;HK1
VEGF, hypoxia, and angiogenesis	3/42	0.381851	0.811264	1.3852	1.33357	EIF1AX;FLT4;PIK3R1
Transcriptional regulation of white adipocyte differentiation	5/77	0.381963	0.811264	1.25073	1.20374	LEP;LPL;CCNC;MED7;MED13L
DARPP-32 events	2/25	0.381971	0.811264	1.56571	1.50686	PPP2R1B;PRKACB
Glutathione conjugation	2/25	0.381971	0.811264	1.56571	1.50686	MGST1;GCLM
IGF1 receptor signaling through beta-arrestin	2/25	0.381971	0.811264	1.56571	1.50686	MAPK10;MAPK15
Interferon alpha signaling regulation	2/25	0.381971	0.811264	1.56571	1.50686	SOCS3;JAK1
Regulatory RNA pathways	2/25	0.381971	0.811264	1.56571	1.50686	AGO3;POLR2L
Activation of pro-caspase 8	1/9	0.385459	0.811264	2.25036	2.14531	TNFRSF10B
Alpha-4 beta-7 integrin signaling	1/9	0.385459	0.811264	2.25036	2.14531	RHOA
Benzo(a)pyrene metabolism	1/9	0.385459	0.811264	2.25036	2.14531	EPHX1
COPII-mediated vesicle transport	1/9	0.385459	0.811264	2.25036	2.14531	SAR1B
Endosomal/vacuolar pathway	1/9	0.385459	0.811264	2.25036	2.14531	LNPEP
Folding of actin by CCT/TriC	1/9	0.385459	0.811264	2.25036	2.14531	CCT7
Inactivation of Cdc42 and Rac	1/9	0.385459	0.811264	2.25036	2.14531	CDC42
Nef-mediated CD4 downregulation	1/9	0.385459	0.811264	2.25036	2.14531	ARF1
PI3K/AKT signalling	1/9	0.385459	0.811264	2.25036	2.14531	RHOA
PPAR-gamma coactivator role in obesity and thermogenesis	1/9	0.385459	0.811264	2.25036	2.14531	LPL
Prostanoid ligand receptors	1/9	0.385459	0.811264	2.25036	2.14531	PTGER3
cAMP receptor, G-protein-independent pathways inferred from amoeba model	1/9	0.385459	0.811264	2.25036	2.14531	KLF6
Cleavage of growing transcript in the termination region	3/43	0.396309	0.813493	1.3505	1.24997	LSM10;CPSF7;MAGOH
Growth hormone receptor signaling	3/43	0.396309	0.813493	1.3505	1.24997	SOCS3;IRS2;PIK3R1
Ascorbate and aldarate metabolism	2/26	0.400907	0.813493	1.5004	1.3714	ALDH2;UGT1A1
Interleukin-27-mediated signaling events	2/26	0.400907	0.813493	1.5004	1.3714	IL27RA;JAK1
RXR/VDR pathway	2/26	0.400907	0.813493	1.5004	1.3714	THRA;VDR
Steroid biosynthesis	2/26	0.400907	0.813493	1.5004	1.3714	DHCR24;LSS
Termination of O-glycan biosynthesis	2/26	0.400907	0.813493	1.5004	1.3714	MUC2;ST3GAL3
BDNF signaling pathway	15/261	0.401202	0.813493	1.09856	1.0033	IL11;EGR3;S100A2;GADD45A;FEM1B;GFPT1;PHKB;ANK3;CLU;PTGS1;KLF6;PPP2R1B;MYC;PEG10;B4GALT6
Cytochrome P450 pathway	4/61	0.401367	0.813493	1.26369	1.1536	CYB5R1;CYB5A;CYP4F3;CYP46A1
Adipogenesis	8/133	0.401597	0.813493	1.15273	1.05165	CNTFR;LIPE;SOCS3;KLF6;GADD45A;LEP;LPL;IRS2
Antigen processing: cross presentation	5/79	0.403108	0.813493	1.2168	1.10552	PSMD12;PSMB5;PSMA1;LNPEP;PSMA8
Glycerophospholipid metabolism	5/79	0.403108	0.813493	1.2168	1.10552	PCYT1B;PHOSPHO1;LPGAT1;PLA2G5;CRLS1
ERBB2/ERBB3 signaling events	3/44	0.410675	0.813493	1.31749	1.17251	CDC42;MAPK10;PIK3R1
NCAM1 interactions	3/44	0.410675	0.813493	1.31749	1.17251	COL4A2;COL4A1;CACNA1G
CXCR4 signaling pathway	7/116	0.411401	0.813493	1.15658	1.02726	CDC42;GNAQ;GNAI3;PIK3R1;CRK;RHOA;VAV1
Signaling events mediated by focal adhesion kinase	4/62	0.413391	0.813493	1.24184	1.09699	ACTN2;PIK3R1;CRK;RHOA
Cardiac muscle contraction	5/80	0.413652	0.813493	1.20051	1.05973	CACNG6;CACNG8;UQCRB;COX6B2;CACNG4
Hemostasis pathway	26/468	0.417284	0.813493	1.05991	0.926351	SIRPG;GNAI3;MPL;PIK3R1;GATA1;CLU;TREM1;CDC42;PPP2R1B;LAMP2;GNA12;PRKACB;FGB;FGA;ACTN2;MMP1;FN1;VEGFB;RHOA;VAV1;GNAQ;CDK2;IRF7;PRKCQ;CRK;LAT
Bile acid and bile salt biosynthesis via 24-hydroxycholesterol	1/10	0.417829	0.813493	2.00021	1.74555	CYP46A1
COPI-mediated vesicle transport	1/10	0.417829	0.813493	2.00021	1.74555	ARF1
DCC role in regulating apoptosis	1/10	0.417829	0.813493	2.00021	1.74555	APPL1
Deregulation of CDK5 in Alzheimer's disease	1/10	0.417829	0.813493	2.00021	1.74555	MAPT
Free radical-induced apoptosis	1/10	0.417829	0.813493	2.00021	1.74555	GPX1
Gap junction degradation	1/10	0.417829	0.813493	2.00021	1.74555	GJA1
Glycoprotein 1b-IX-V activation signaling	1/10	0.417829	0.813493	2.00021	1.74555	PIK3R1
IKK complex recruitment mediated by RIP1	1/10	0.417829	0.813493	2.00021	1.74555	TLR4
Insulin secretion regulation by acetylcholine	1/10	0.417829	0.813493	2.00021	1.74555	GNAQ
NODAL signaling regulation	1/10	0.417829	0.813493	2.00021	1.74555	ACVR1C
PIP biosynthesis at the late endosome membrane	1/10	0.417829	0.813493	2.00021	1.74555	PIK3C3
Splicing regulation through Sam68	1/10	0.417829	0.813493	2.00021	1.74555	CDK1
TRAF6-mediated IRF7 activation in TLR7/8 or 9 signaling	1/10	0.417829	0.813493	2.00021	1.74555	IRF7
Tetrahydrobiopterin (BH4) biosynthesis, recycling, salvage and regulation	1/10	0.417829	0.813493	2.00021	1.74555	SPR
Zinc influx into cells by the SLC39 gene family	1/10	0.417829	0.813493	2.00021	1.74555	SLC39A10
CTCF pathway	2/27	0.419565	0.813493	1.4403	1.25096	MYC;PIK3R1
EGFR downregulation	2/27	0.419565	0.813493	1.4403	1.25096	CDC42;SPRY2
ERK5 role in neuronal survival pathway	2/27	0.419565	0.813493	1.4403	1.25096	BDNF;PIK3R1
FSH signaling pathway	2/27	0.419565	0.813493	1.4403	1.25096	BDNF;APPL1
Insulin regulation of blood glucose	2/27	0.419565	0.813493	1.4403	1.25096	LNPEP;YWHAG
Pentose phosphate pathway	2/27	0.419565	0.813493	1.4403	1.25096	PRPS2;PGM1
VEGFR1 pathway	2/27	0.419565	0.813493	1.4403	1.25096	VEGFB;PIK3R1
eIF4E and p70 S6 kinase regulation	2/27	0.419565	0.813493	1.4403	1.25096	PIK3R1;EIF4G2
MAP kinase signaling pathway	5/81	0.424166	0.813493	1.18465	1.01599	MAPK10;ATF2;MYC;MAP4K5;MAP4K3
Interleukin-3 signaling pathway	3/45	0.424932	0.813493	1.28605	1.10064	PIK3R1;JAK1;BCL2L1
RhoA signaling pathway	3/45	0.424932	0.813493	1.28605	1.10064	CDC42;ATF2;RHOA
Signaling by FGFR mutants	3/45	0.424932	0.813493	1.28605	1.10064	TRIM24;PIK3R1;FGF1
Wnt interactions in lipid metabolism and immune response	3/45	0.424932	0.813493	1.28605	1.10064	GJA1;MMP1;MYC
Folate metabolism	4/63	0.425363	0.813493	1.22073	1.04349	MTRR;MTHFD1;SHMT1;CAT
Proteasome degradation	4/63	0.425363	0.813493	1.22073	1.04349	PSMD12;PSMB5;PSMA1;UBA1
NGF signaling via TRKA from the plasma membrane	8/136	0.425845	0.813493	1.12554	0.960851	NTRK2;PPP2R1B;CDK1;IRS2;PIK3R1;PRKACB;CRK;RHOA
Prolactin regulation of apoptosis	7/118	0.428791	0.813493	1.13562	0.961624	SOCS3;KLF6;BCL6;AKAP9;ANK3;ARSG;BRCA1
p53 activity regulation	7/118	0.428791	0.813493	1.13562	0.961624	CCNE1;GADD45A;CHEK1;CDK2;CDK1;TNFRSF10B;SKP2
Myometrial relaxation and contraction pathways	9/155	0.430518	0.813493	1.11012	0.935571	RYR1;ATF2;GJA1;RGS3;GNAQ;PRKCQ;PRKACB;CRHR1;YWHAG
MAPK cascade role in angiogenesis	4/64	0.437272	0.813493	1.20032	0.992904	CDC42;ATF2;FGF1;CRK
G-protein activation	2/28	0.437921	0.813493	1.38483	1.14348	GNAI3;OPRM1
Interleukin receptor SHC signaling	2/28	0.437921	0.813493	1.38483	1.14348	PIK3R1;JAK1
Nef in HIV-1 replication and disease pathogenesis	2/28	0.437921	0.813493	1.38483	1.14348	ARF1;CD8B
Alpha-6 beta-1 and alpha-6 beta-4 integrin signaling	3/46	0.439068	0.813493	1.25608	1.03388	LAMB2;PIK3R1;YWHAG
Polo-like kinase 1 (PLK1) pathway	3/46	0.439068	0.813493	1.25608	1.03388	RAB1A;CDK1;RHOA
Melanogenesis	6/101	0.441186	0.813493	1.1372	0.93056	WNT11;FZD5;GNAQ;GNAI3;CALML3;PRKACB
RNA polymerase II transcription	6/101	0.441186	0.813493	1.1372	0.93056	LSM10;CPSF7;TAF13;MAGOH;GTF2E2;POLR2L
Interleukin-1 regulation of extracellular matrix	7/120	0.446116	0.813493	1.1154	0.900323	ATF2;LOX;CFH;MMP1;ALDH1A1;CAT;INHBA
Alpha-linolenic (omega3) and linoleic (omega6) acid metabolism	1/11	0.448495	0.813493	1.8001	1.44342	ACOX1
Attenuation of GPCR signaling	1/11	0.448495	0.813493	1.8001	1.44342	PRKACB
BTG family proteins and cell cycle regulation	1/11	0.448495	0.813493	1.8001	1.44342	FGF1
Cardiac protection against reactive oxygen species	1/11	0.448495	0.813493	1.8001	1.44342	GPX1
Cystic fibrosis transmembrane conductance regulator (CFTR) and beta 2 adrenergic receptor (b2AR) pathway	1/11	0.448495	0.813493	1.8001	1.44342	PRKACB
Folate biosynthesis	1/11	0.448495	0.813493	1.8001	1.44342	SPR
Glutathione biosynthesis and recycling	1/11	0.448495	0.813493	1.8001	1.44342	GCLM
Glypican-3 pathway	1/11	0.448495	0.813493	1.8001	1.44342	GPC3
Hormone ligand-binding G-protein coupled receptors	1/11	0.448495	0.813493	1.8001	1.44342	GNRH2
Integrin beta-4 pathway	1/11	0.448495	0.813493	1.8001	1.44342	LAMB2
Notch receptor processing	1/11	0.448495	0.813493	1.8001	1.44342	NOTCH2
Passive transport by aquaporins	1/11	0.448495	0.813493	1.8001	1.44342	AQP7
Recruitment of NuMA to mitotic centrosomes	1/11	0.448495	0.813493	1.8001	1.44342	CDK1
SLBP-dependent processing of replication-dependent histone pre-mRNAs	1/11	0.448495	0.813493	1.8001	1.44342	LSM10
SUMOylation as a mechanism to modulate CtBP-dependent gene responses	1/11	0.448495	0.813493	1.8001	1.44342	UBA1
Signaling by activated point mutants of FGFR1	1/11	0.448495	0.813493	1.8001	1.44342	FGF1
Tryptophan catabolism	1/11	0.448495	0.813493	1.8001	1.44342	AADAT
p38 gamma/delta MAPK pathway	1/11	0.448495	0.813493	1.8001	1.44342	MAPT
ERK1/ERK2 MAPK pathway	4/65	0.449109	0.813493	1.18058	0.945042	TERT;MYC;PRKACB;SOS2
LKB1 signaling events	3/47	0.453069	0.813493	1.22747	0.9718	MYC;MAPT;YWHAG
Differentiation pathway in PC12 cells	5/84	0.455469	0.813493	1.13948	0.89612	MAPK10;EGR3;ANXA2;GNAQ;PRKACB
ECM-receptor interaction	5/84	0.455469	0.813493	1.13948	0.89612	COL4A2;SV2B;COL4A1;LAMB2;FN1
ADP-ribosylation factor	2/29	0.455956	0.813493	1.33347	1.04726	ARF1;ARHGAP6
Amine compound SLC transporters	2/29	0.455956	0.813493	1.33347	1.04726	SLC44A4;SLC6A20
Homologous recombination	2/29	0.455956	0.813493	1.33347	1.04726	RAD51D;RAD54B
Lipoprotein metabolism	2/29	0.455956	0.813493	1.33347	1.04726	SAR1B;LPL
Phototransduction	2/29	0.455956	0.813493	1.33347	1.04726	CALML3;GUCA1C
Sema4D in semaphorin signaling	2/29	0.455956	0.813493	1.33347	1.04726	CDC42;RHOA
Skeletal myogenesis control by HDAC and calcium/calmodulin-dependent kinase (CaMK)	2/29	0.455956	0.813493	1.33347	1.04726	HDAC5;PIK3R1
Thyroid cancer	2/29	0.455956	0.813493	1.33347	1.04726	PAX8;MYC
Destabilization of mRNA by AUF1 (hnRNP D0)	4/66	0.460865	0.813493	1.16147	0.899736	PSMD12;PSMB5;PSMA1;PSMA8
Asparagine N-linked glycosylation	5/85	0.465802	0.813493	1.12518	0.85963	DPM1;SAR1B;GFPT1;MAN1A1;B4GALT6
Activation of chaperones by IRE1 alpha	3/48	0.466922	0.813493	1.20013	0.914008	DNAJC3;WFS1;GFPT1
HES/HEY pathway	3/48	0.466922	0.813493	1.20013	0.914008	SPEN;TLE1;GATA1
N-glycan biosynthesis	3/48	0.466922	0.813493	1.20013	0.914008	DPM1;MAN1A1;STT3B
G alpha 13 pathway	4/67	0.472534	0.813493	1.14298	0.85683	CDC42;ARHGEF15;PRKCQ;RHOA
Activation of matrix metalloproteinases	2/30	0.473651	0.813493	1.28578	0.960846	MMP16;MMP1
Biosynthesis of the N-glycan precursor (dolichol lipid-linked oligosaccharide, LLO) and transfer to a nascent protein	2/30	0.473651	0.813493	1.28578	0.960846	DPM1;GFPT1
CDC42 activity regulation	2/30	0.473651	0.813493	1.28578	0.960846	CDC42;ITSN1
Inflammatory response pathway	2/30	0.473651	0.813493	1.28578	0.960846	LAMB2;FN1
Interferon-beta enhancer pathway	2/30	0.473651	0.813493	1.28578	0.960846	ATF2;IRF7
MicroRNAs in muscle cell differentiation	2/30	0.473651	0.813493	1.28578	0.960846	PRKCQ;PRKACB
O-glycan biosynthesis	2/30	0.473651	0.813493	1.28578	0.960846	GCNT3;GALNTL6
Retinoic acid receptor-mediated signaling	2/30	0.473651	0.813493	1.28578	0.960846	VDR;CDK1
Signaling pathway from G-protein families	2/30	0.473651	0.813493	1.28578	0.960846	GNAQ;PRKACB
Toll-like receptor signaling pathway regulation	8/142	0.473994	0.813493	1.0748	0.802402	MAPK10;CUEDC2;IRF7;PIK3R1;TMED7;ZMYND11;TREM1;TLR4
Activation of chaperones by ATF6 alpha	1/12	0.477548	0.813493	1.63636	1.20942	MBTPS1
Alanine and aspartate metabolism	1/12	0.477548	0.813493	1.63636	1.20942	AGXT
Caspase-mediated cleavage of cytoskeletal proteins	1/12	0.477548	0.813493	1.63636	1.20942	MAPT
Dopamine neurotransmitter release cycle	1/12	0.477548	0.813493	1.63636	1.20942	SYN1
ERK inactivation	1/12	0.477548	0.813493	1.63636	1.20942	PPP2R1B
FGFR3 ligand binding and activation	1/12	0.477548	0.813493	1.63636	1.20942	FGF1
Facilitative sodium-independent glucose transporters	1/12	0.477548	0.813493	1.63636	1.20942	SLC2A12
GABA (A) receptor activation	1/12	0.477548	0.813493	1.63636	1.20942	GABRB2
Inhibition of replication initiation of damaged DNA by RB1/E2F1	1/12	0.477548	0.813493	1.63636	1.20942	PPP2R1B
Opening of calcium channels triggered by depolarization of the presynaptic terminal	1/12	0.477548	0.813493	1.63636	1.20942	CACNG4
Peptide hormone biosynthesis	1/12	0.477548	0.813493	1.63636	1.20942	INHBA
Phosphatidylethanolamine biosynthesis	1/12	0.477548	0.813493	1.63636	1.20942	PHOSPHO1
Phospholipase C epsilon pathway	1/12	0.477548	0.813493	1.63636	1.20942	PRKACB
Pyruvate dehydrogenase (PDH) complex regulation	1/12	0.477548	0.813493	1.63636	1.20942	DLD
Rab GTPases mark targets in the endocytotic machinery	1/12	0.477548	0.813493	1.63636	1.20942	RAB1A
Resolution of AP sites via the single-nucleotide replacement pathway	1/12	0.477548	0.813493	1.63636	1.20942	MUTYH
SODD/TNFR1 signaling pathway	1/12	0.477548	0.813493	1.63636	1.20942	BAG4
Salmonella infection	1/12	0.477548	0.813493	1.63636	1.20942	CDC42
Serotonin receptors	1/12	0.477548	0.813493	1.63636	1.20942	HTR5A
Amino acid and oligopeptide SLC transporters	3/49	0.480617	0.817485	1.17398	0.860153	SLC6A20;SLC7A2;SLC38A5
Epithelial cell signaling in Helicobacter pylori infection	4/68	0.484106	0.820623	1.12506	0.816176	CDC42;MAPK10;PTPRZ1;ATP6V1F
Mitotic G2-G2/M phases	5/87	0.486282	0.820623	1.09762	0.791346	AKAP9;CDK2;CDK1;YWHAG;CDC25A
Interleukin-1 signaling pathway	7/125	0.48895	0.820623	1.06785	0.764044	MAPK10;ATF2;UBE2H;UBE2D4;PIK3R1;UBE2J2;MAPK15
Inwardly rectifying potassium channels	2/31	0.490993	0.820623	1.24138	0.883025	KCNJ5;ABCC9
Ras family activation regulation	2/31	0.490993	0.820623	1.24138	0.883025	RIN1;SOS2
Signal amplification	2/31	0.490993	0.820623	1.24138	0.883025	GNAQ;GNAI3
Stathmin and breast cancer resistance to antimicrotubule agents	2/31	0.490993	0.820623	1.24138	0.883025	CDK1;PRKACB
Phosphatidylinositol metabolism	3/50	0.494144	0.820623	1.14894	0.809919	ARF1;PIK3C3;PIK3R1
DNA replication pre-Initiation	5/88	0.496418	0.820623	1.08434	0.759401	PSMD12;PSMB5;PSMA1;CDK2;PSMA8
Purine metabolism	9/164	0.497996	0.820623	1.04516	0.728648	PRPS2;GPX1;NPR1;CAT;ADK;PDE7A;PDE8A;PGM1;POLR2L
Adenylate cyclase inhibitory pathway	1/13	0.505072	0.820623	1.49992	1.02453	GNAI3
Alpha-hemoglobin stabilizing enzyme (AHSP) pathway	1/13	0.505072	0.820623	1.49992	1.02453	GATA1
Chondroitin sulfate/dermatan sulfate degradation	1/13	0.505072	0.820623	1.49992	1.02453	ARSB
Cytosolic sulfonation of small molecules	1/13	0.505072	0.820623	1.49992	1.02453	SULT2A1
Death receptor signaling	1/13	0.505072	0.820623	1.49992	1.02453	TNFRSF10B
Double stranded RNA-induced gene expression	1/13	0.505072	0.820623	1.49992	1.02453	DNAJC3
FGFR4 ligand binding and activation	1/13	0.505072	0.820623	1.49992	1.02453	FGF1
Irinotecan pathway	1/13	0.505072	0.820623	1.49992	1.02453	UGT1A1
Keap1-Nrf2 pathway	1/13	0.505072	0.820623	1.49992	1.02453	GCLM
NICD trafficking to the nucleus	1/13	0.505072	0.820623	1.49992	1.02453	NOTCH2
PIP biosynthesis at the early endosome membrane	1/13	0.505072	0.820623	1.49992	1.02453	PIK3C3
Purine salvage	1/13	0.505072	0.820623	1.49992	1.02453	ADK
Signal regulatory protein (SIRP) family interactions	1/13	0.505072	0.820623	1.49992	1.02453	SIRPG
Salivary secretion	5/89	0.506478	0.820623	1.07137	0.728827	TRPV6;GNAQ;CALML3;LPO;PRKACB
Complement and coagulation cascades	4/70	0.506935	0.820623	1.09085	0.741094	FGB;FGA;CFH;MASP1
Signaling events mediated by HDAC class I	4/70	0.506935	0.820623	1.09085	0.741094	HDAC5;TFCP2;GATA1;NR2C1
Signaling events mediated by VEGFR1 and VEGFR2	4/70	0.506935	0.820623	1.09085	0.741094	CDC42;ARF1;PIK3R1;RHOA
Glutathione metabolism	3/51	0.507492	0.820623	1.12494	0.763019	GPX1;MGST1;GCLM
Alpha-synuclein signaling	2/32	0.50797	0.820623	1.19994	0.812757	CSNK2A1;PARK7
Fibrin clot formation (clotting cascade)	2/32	0.50797	0.820623	1.19994	0.812757	FGB;FGA
Hypothetical network for drug addiction	2/32	0.50797	0.820623	1.19994	0.812757	GRM5;PPA1
Serotonin HTR1 group and FOS pathway	2/32	0.50797	0.820623	1.19994	0.812757	GNAI3;RHOA
Signaling by Robo receptor	2/32	0.50797	0.820623	1.19994	0.812757	CDC42;SOS2
Sphingolipid de novo biosynthesis	2/32	0.50797	0.820623	1.19994	0.812757	SPTLC1;OSBP
Syndecan 4 pathway	2/32	0.50797	0.820623	1.19994	0.812757	FN1;RHOA
Cell cycle	24/453	0.517626	0.831809	1.00678	0.662964	HDAC5;ARF1;CDKN2B;PSMD12;GADD45A;DYRK1A;BRCA1;CDC25A;NSL1;SKA2;PSMA8;PSMB5;TERT;PSMA1;PPP2R1B;CCNE1;MYC;CDK2;CHEK1;AKAP9;CDK1;SKP2;ATRIP;YWHAG
RIG-I-like receptor signaling pathway	4/71	0.518179	0.831809	1.07451	0.706422	MAPK10;NLRX1;IRF7;IFNW1
Adaptive immune system	32/606	0.519568	0.831809	1.00321	0.65686	ARF1;PSMD12;UBE2D4;SAR1B;NEDD4L;UBR2;RNF6;PIK3R1;UBE2J2;PSMA8;DYNC2LI1;CDC42;SOCS3;PSMB5;PPP2R1B;ASB10;FBXO3;CTSF;SKP2;CTSE;PRKACB;UBE2H;LNPEP;LRRC41;VAV1;PJA1;SPSB2;PSMA1;CD8B;PRKCQ;UBA1;LAT
PDGFB signaling pathway	7/129	0.522496	0.831809	1.03262	0.670315	MAPK10;MYC;PIK3R1;BAIAP2;CRK;YWHAG;RHOA
Syndecan 2 pathway	2/33	0.524572	0.831809	1.16117	0.749154	FN1;RHOA
Gastrin-CREB signaling pathway via PKC and MAPK	11/206	0.524874	0.831809	1.01517	0.654374	PROKR2;P2RY6;XCR1;ANXA1;GNAQ;P2RY2;MLNR;GNRH2;CDK1;PRKCQ;PIK3R1
Costimulation by the CD28 family	4/72	0.529301	0.831809	1.05866	0.673515	CDC42;PPP2R1B;PIK3R1;VAV1
Activation of Rac	1/14	0.531146	0.831809	1.38447	0.875978	SOS2
CARM1 transcriptional regulation by protein methylation	1/14	0.531146	0.831809	1.38447	0.875978	PRKACB
Complement cascade regulation	1/14	0.531146	0.831809	1.38447	0.875978	CFH
DCC-mediated attractive signaling	1/14	0.531146	0.831809	1.38447	0.875978	CDC42
Hyaluronan metabolism	1/14	0.531146	0.831809	1.38447	0.875978	ABCC5
Initiation of the second proteolytic cleavage of Notch receptor by receptor-ligand binding	1/14	0.531146	0.831809	1.38447	0.875978	NOTCH2
Interleukin-6 regulation of target genes	1/14	0.531146	0.831809	1.38447	0.875978	ABCC5
Intronless pre-mRNA processing	1/14	0.531146	0.831809	1.38447	0.875978	CPSF7
Lectin-induced complement pathway	1/14	0.531146	0.831809	1.38447	0.875978	MASP1
MAP kinase inactivation of SMRT corepressor	1/14	0.531146	0.831809	1.38447	0.875978	THRA
Non-homologous end-joining (NHEJ) pathway	1/14	0.531146	0.831809	1.38447	0.875978	DCLRE1C
Porphyrin metabolism	1/14	0.531146	0.831809	1.38447	0.875978	UGT1A1
Signaling by NOTCH2	1/14	0.531146	0.831809	1.38447	0.875978	NOTCH2
TRAF3-dependent IRF activation pathway	1/14	0.531146	0.831809	1.38447	0.875978	IRF7
Viral messenger RNA biosynthesis	1/14	0.531146	0.831809	1.38447	0.875978	POLR2L
GABA A and B receptor activation	3/53	0.533622	0.834525	1.07983	0.678206	GABRB2;KCNJ5;GNAI3
Chemokine signaling pathway	10/189	0.539699	0.839905	1.00527	0.619991	CDC42;XCR1;GNAI3;PIK3R1;CCL18;PRKACB;CRK;SOS2;RHOA;VAV1
EGF receptor transactivation by GPCRs in cardiac hypertrophy	2/34	0.540792	0.839905	1.12482	0.691452	MYC;RHOA
EPO receptor signaling	2/34	0.540792	0.839905	1.12482	0.691452	CSNK2A1;IRS2
Fructose and mannose metabolism	2/34	0.540792	0.839905	1.12482	0.691452	PFKFB3;HK1
TOR signaling	2/34	0.540792	0.839905	1.12482	0.691452	CDC42;RRAGC
Arginine and proline metabolism	3/54	0.546389	0.840158	1.0586	0.639844	ALDH4A1;AOC1;ALDH2
Meiotic recombination	3/54	0.546389	0.840158	1.0586	0.639844	MSH5;CDK2;BRCA1
RANKL regulation of apoptosis and immune response	4/74	0.551157	0.840158	1.0283	0.612595	CDC42;DLG1;CDK1;DTX1
Cell surface interactions at the vascular wall	5/94	0.555474	0.840158	1.01091	0.59435	MMP1;SIRPG;FN1;PIK3R1;TREM1
Fc gamma receptor-mediated phagocytosis	5/94	0.555474	0.840158	1.01091	0.59435	CDC42;PIK3R1;CRK;VAV1;LAT
Calcium signaling by HBx of hepatitis B virus	1/15	0.555849	0.840158	1.28551	0.754928	CSNK2A1
Cytochrome P450 metabolism of endogenous sterols	1/15	0.555849	0.840158	1.28551	0.754928	CYP46A1
Eicosanoid ligand-binding G-protein coupled receptors	1/15	0.555849	0.840158	1.28551	0.754928	PTGER3
Erythrocyte differentiation pathway	1/15	0.555849	0.840158	1.28551	0.754928	IL11
Glycosaminoglycan biosynthesis: keratan sulfate	1/15	0.555849	0.840158	1.28551	0.754928	ST3GAL3
Glycosylation of mammalian N-linked oligosaccarides	1/15	0.555849	0.840158	1.28551	0.754928	MAN1A1
Hematopoiesis regulation by cytokines	1/15	0.555849	0.840158	1.28551	0.754928	IL11
Signaling to p38 via RIT and RIN	1/15	0.555849	0.840158	1.28551	0.754928	CDK1
TRAF6-mediated induction of TAK1 complex	1/15	0.555849	0.840158	1.28551	0.754928	TLR4
Terpenoid backbone biosynthesis	1/15	0.555849	0.840158	1.28551	0.754928	ACAT1
TrkA receptor signaling pathway	1/15	0.555849	0.840158	1.28551	0.754928	PIK3R1
Autophagy regulation	2/35	0.556623	0.840158	1.09068	0.638992	GABARAPL1;PIK3C3
Base excision repair	2/35	0.556623	0.840158	1.09068	0.638992	NEIL3;MUTYH
EGF receptor (ErbB1) signaling pathway	2/35	0.556623	0.840158	1.09068	0.638992	GNAI3;PIK3R1
PIK3C1/AKT pathway	2/35	0.556623	0.840158	1.09068	0.638992	YWHAG;BCL2L1
Primary immunodeficiency	2/35	0.556623	0.840158	1.09068	0.638992	DCLRE1C;CD8B
TAp63 pathway	3/55	0.558949	0.842539	1.03819	0.603911	S100A2;GADD45A;VDR
Fas signaling pathway	6/115	0.568099	0.846971	0.990405	0.560035	MAPK10;SMPD1;PIK3R1;MAPK15;HIPK3;AGFG1
GM-CSF-mediated signaling events	2/36	0.572063	0.846971	1.05854	0.591204	PIK3R1;PRKACB
Ion transport by P-type ATPases	2/36	0.572063	0.846971	1.05854	0.591204	ATP7B;ATP9B
PI3K/PLC/TRK pathway	2/36	0.572063	0.846971	1.05854	0.591204	PIK3R1;YWHAG
Signaling to ERKs	2/36	0.572063	0.846971	1.05854	0.591204	CDK1;CRK
VEGF signaling pathway	4/76	0.572466	0.846971	0.999629	0.557596	CDC42;CHP1;PIK3R1;PLA2G5
Transport of glucose and other sugars, bile salts and organic acids, metal ions and amine compounds	5/96	0.57439	0.846971	0.988592	0.548121	SLC44A4;SLC2A12;SLC5A11;SLC39A10;SLC6A20
Acyl chain remodelling of phosphatidylinositol	1/16	0.579251	0.846971	1.19975	0.655085	PLA2G5
B cell survival pathway	1/16	0.579251	0.846971	1.19975	0.655085	PIK3R1
Cell-extracellular matrix interactions	1/16	0.579251	0.846971	1.19975	0.655085	ILK
Ghrelin biosynthesis, secretion, and deacylation	1/16	0.579251	0.846971	1.19975	0.655085	LEP
Glyoxylate and dicarboxylate metabolism	1/16	0.579251	0.846971	1.19975	0.655085	MTHFD1
Hypoxia-inducible factor in the cardivascular system	1/16	0.579251	0.846971	1.19975	0.655085	ASPH
Inhibition of platelet activation by aspirin	1/16	0.579251	0.846971	1.19975	0.655085	PTGS1
Interleukin-10 anti-inflammatory signaling pathway	1/16	0.579251	0.846971	1.19975	0.655085	JAK1
JNK (c-Jun kinases) phosphorylation and activation mediated by activated human TAK1	1/16	0.579251	0.846971	1.19975	0.655085	MAPK10
Other glycan degradation	1/16	0.579251	0.846971	1.19975	0.655085	NEU3
Primary bile acid biosynthesis	1/16	0.579251	0.846971	1.19975	0.655085	CYP46A1
Rap1 signaling	1/16	0.579251	0.846971	1.19975	0.655085	PRKACB
Selenium metabolism and selenoproteins	1/16	0.579251	0.846971	1.19975	0.655085	FABP1
Serotonin receptor 2 and ELK-SRF/GATA4 signaling	1/16	0.579251	0.846971	1.19975	0.655085	GNAQ
Sprouty regulation of FGF signaling	1/16	0.579251	0.846971	1.19975	0.655085	SPRY2
TGF-beta receptor signaling in EMT (epithelial to mesenchymal transition)	1/16	0.579251	0.846971	1.19975	0.655085	RHOA
Acute myeloid leukemia	3/57	0.583428	0.846971	0.99963	0.538635	MYC;PIK3R1;SOS2
Pathogenic Escherichia coli infection	3/57	0.583428	0.846971	0.99963	0.538635	CDC42;TLR4;RHOA
Diabetes pathways	7/137	0.586863	0.846971	0.968665	0.516263	DNAJC3;MBTPS1;WFS1;MMP1;MYC;LEP;GFPT1
FRA pathway	2/37	0.587107	0.846971	1.02825	0.54759	GJA1;MMP1
Interleukin-23-mediated signaling events	2/37	0.587107	0.846971	1.02825	0.54759	SOCS3;PIK3R1
Phosphatidylinositol signaling system	4/78	0.593194	0.846971	0.972509	0.507877	ITPKA;CALML3;PIK3C3;PIK3R1
Signaling by SCF-KIT	4/78	0.593194	0.846971	0.972509	0.507877	CHEK1;CDK1;PIK3R1;VAV1
ABCA transporters in lipid homeostasis	1/17	0.601421	0.846971	1.1247	0.571867	PEX19
ACE inhibitor pathway	1/17	0.601421	0.846971	1.1247	0.571867	REN
Acyl chain remodelling of phosphatidylserine	1/17	0.601421	0.846971	1.1247	0.571867	PLA2G5
Beta-catenin phosphorylation cascade	1/17	0.601421	0.846971	1.1247	0.571867	PPP2R1B
Cadmium-induced DNA biosynthesis and proliferation in macrophages	1/17	0.601421	0.846971	1.1247	0.571867	MYC
Cell to cell adhesion signaling	1/17	0.601421	0.846971	1.1247	0.571867	ACTN2
Complement activation, classical pathway	1/17	0.601421	0.846971	1.1247	0.571867	MASP1
Glycosylphosphatidylinositol (GPI) biosynthesis	1/17	0.601421	0.846971	1.1247	0.571867	PIGP
Inflammasomes	1/17	0.601421	0.846971	1.1247	0.571867	BCL2L1
Insulin-like growth factor (IGF) activity regulation by insulin-like growth factor binding proteins (IGFBPs)	1/17	0.601421	0.846971	1.1247	0.571867	MMP1
Integrin beta-5 pathway	1/17	0.601421	0.846971	1.1247	0.571867	FN1
Nitric oxide metabolism	1/17	0.601421	0.846971	1.1247	0.571867	SPR
Phenylalanine metabolism	1/17	0.601421	0.846971	1.1247	0.571867	DDC
Platelet sensitization by LDL	1/17	0.601421	0.846971	1.1247	0.571867	PPP2R1B
SHC-related events	1/17	0.601421	0.846971	1.1247	0.571867	CDK1
SUMOylation by RanBP2 regulates transcriptional repression	1/17	0.601421	0.846971	1.1247	0.571867	PIAS2
Sulfation biotransformation reaction	1/17	0.601421	0.846971	1.1247	0.571867	SULT2A1
Zinc transporters	1/17	0.601421	0.846971	1.1247	0.571867	SLC39A10
ERBB4 signaling events	2/38	0.601755	0.846971	0.99963	0.507716	WWOX;PIK3R1
RAC1 activity regulation	2/38	0.601755	0.846971	0.99963	0.507716	PREX2;VAV1
Signaling of hepatocyte growth factor receptor	2/38	0.601755	0.846971	0.99963	0.507716	PIK3R1;CRK
Triglyceride biosynthesis	2/38	0.601755	0.846971	0.99963	0.507716	ACSL4;ACSL3
p38 alpha/beta MAPK downstream pathway	2/38	0.601755	0.846971	0.99963	0.507716	ATF2;CSNK2A1
Signaling events mediated by hepatocyte growth factor receptor (c-Met)	4/79	0.603332	0.847072	0.959492	0.48482	CDC42;PIK3R1;CRK;RHOA
Unfolded protein response	4/79	0.603332	0.847072	0.959492	0.48482	DNAJC3;MBTPS1;WFS1;GFPT1
Caspase cascade in apoptosis	3/59	0.607024	0.851195	0.963827	0.481129	CASP4;TNFRSF10B;BCL2L1
Dilated cardiomyopathy	5/100	0.610906	0.855418	0.946766	0.466577	CACNG6;CACNG8;SGCB;PRKACB;CACNG4
Generic transcription pathway	19/377	0.611555	0.855418	0.954127	0.469191	NOTCH2;ZNF264;CDKN2B;ZNF460;THRA;ZNF195;VDR;NEDD4L;CCNC;NR2E1;NR2C1;MED7;MYC;ZNF317;ZNF446;ZNF655;ZNF267;TEAD3;ZNF596
Opioid signaling	4/80	0.613315	0.856305	0.946817	0.462877	PPP2R1B;GNAI3;OPRM1;PRKACB
Angiotensin II-mediated activation of JNK pathway via Pyk2-dependent signaling	2/39	0.616008	0.856305	0.972562	0.471202	ATF2;GNAQ
Aurora B signaling	2/39	0.616008	0.856305	0.972562	0.471202	AURKC;RHOA
FRS2-mediated cascade	2/39	0.616008	0.856305	0.972562	0.471202	CDK1;FGF1
Effect of METS on macrophage differentiation	1/18	0.622424	0.856305	1.05849	0.501865	HDAC5
Human cytomegalovirus and MAP kinase pathways	1/18	0.622424	0.856305	1.05849	0.501865	PIK3R1
PKA activation in glucagon signaling	1/18	0.622424	0.856305	1.05849	0.501865	PRKACB
Pertussis toxin-insensitive CCR5 signaling in macrophage	1/18	0.622424	0.856305	1.05849	0.501865	GNAQ
Sodium/chloride-dependent neurotransmitter transporters	1/18	0.622424	0.856305	1.05849	0.501865	SLC6A20
Tie2 signaling	1/18	0.622424	0.856305	1.05849	0.501865	PIK3R1
Signaling by PDGF	6/122	0.626058	0.856305	0.930293	0.435668	COL4A2;COL4A1;CDK1;PIK3R1;PRKACB;CRK
Androgen receptor proteolysis and transcription regulation	3/61	0.629714	0.856305	0.930493	0.430344	TMF1;BRCA1;APPL1
Clathrin derived vesicle budding	3/61	0.629714	0.856305	0.930493	0.430344	ARF1;PUM1;CLINT1
FGF signaling pathway	3/61	0.629714	0.856305	0.930493	0.430344	SPRY2;PIK3R1;FGF1
HIV genome transcription	3/61	0.629714	0.856305	0.930493	0.430344	TAF13;GTF2E2;POLR2L
Licensing factor removal from origins	3/61	0.629714	0.856305	0.930493	0.430344	PSMD12;PSMB5;PSMA1
Negative regulation of FGFR signaling	2/40	0.629865	0.856305	0.946918	0.437713	SPRY2;FGF1
Pyruvate metabolism and citric acid (TCA) cycle	2/40	0.629865	0.856305	0.946918	0.437713	ADHFE1;DLD
Regular glucocorticoid receptor pathway	4/82	0.632807	0.856305	0.922441	0.422099	MAPK10;MMP1;PRKACB;PBX1
MHC class II antigen presentation	5/103	0.637063	0.856305	0.917637	0.413751	DYNC2LI1;ARF1;SAR1B;CTSF;CTSE
Interleukin-5 regulation of apoptosis	7/144	0.639441	0.856305	0.918829	0.410865	IL1RL1;EGR3;GADD45A;P2RY2;CASP4;INHBA;TLR4
Shigellosis	3/62	0.640713	0.856305	0.914673	0.407188	CDC42;MAPK10;CRK
Drug metabolism: cytochrome P450	4/83	0.642312	0.856305	0.910717	0.403157	UGT1A1;EPHX1;MGST1;ADH5
Apoptosis modulation by HSP70	1/19	0.642321	0.856305	0.99963	0.442503	MAPK10
Calcineurin in effects in keratinocyte differentiation	1/19	0.642321	0.856305	0.99963	0.442503	GNAQ
Class C GPCRs (metabotropic glutamate and pheromone receptors)	1/19	0.642321	0.856305	0.99963	0.442503	GRM5
ER-associated degradation (ERAD) pathway	1/19	0.642321	0.856305	0.99963	0.442503	MAN1A1
Eicosanoid biosynthesis	1/19	0.642321	0.856305	0.99963	0.442503	PTGS1
Gap junction assembly	1/19	0.642321	0.856305	0.99963	0.442503	GJA1
Hypoxic and oxygen homeostasis regulation of HIF-1-alpha	1/19	0.642321	0.856305	0.99963	0.442503	EGLN1
Inhibition of T cell receptor signaling by activated Csk	1/19	0.642321	0.856305	0.99963	0.442503	PRKACB
Lissencephaly gene (LIS1) in neuronal migration and development	1/19	0.642321	0.856305	0.99963	0.442503	CSNK2A1
Resolution of abasic sites (AP sites)	1/19	0.642321	0.856305	0.99963	0.442503	MUTYH
STAT3 pathway	1/19	0.642321	0.856305	0.99963	0.442503	JAK1
Signaling by NODAL	1/19	0.642321	0.856305	0.99963	0.442503	ACVR1C
Signaling by constitutively active EGFR	1/19	0.642321	0.856305	0.99963	0.442503	PIK3R1
Small ligand GPCRs	1/19	0.642321	0.856305	0.99963	0.442503	PTGER3
Tamoxifen metabolism	1/19	0.642321	0.856305	0.99963	0.442503	SULT2A1
Bioactive peptide-induced signaling pathway	2/41	0.643329	0.856305	0.922589	0.406954	PIK3R1;MAPT
Fc epsilon receptor I signaling in mast cells	2/41	0.643329	0.856305	0.922589	0.406954	PIK3R1;VAV1
Cytokine-cytokine receptor interaction	13/265	0.643369	0.856305	0.927331	0.408987	CNTFR;IL11;XCR1;FLT4;VEGFB;MPL;TNFRSF10B;INHBA;IFNW1;LEP;LEPR;CCL18;TNFRSF21
Netrin-1 signaling	2/42	0.656402	0.866778	0.899477	0.378663	CDC42;PRKCQ
Signaling events mediated by T cell protein tyrosine phosphatase (TC-PTP)	2/42	0.656402	0.866778	0.899477	0.378663	PIK3R1;JAK1
Signaling by GPCR	49/977	0.66108	0.866778	0.947644	0.392211	CHRM2;ITSN1;OR5K1;MLNR;OR4M2;OR10AG1;GRM5;PPP2R1B;PRKACB;PDE8A;OR52B6;ANXA1;PLEKHG5;OR52E2;OPRM1;RHOA;VAV1;PRKCQ;OR8G5;SOS2;OR4A15;OR4C13;OR6K6;PTGER3;GNAI3;PIK3R1;CRHR1;OR52L1;CDC42;OR5M11;PROKR2;P2RY6;OR2AK2;WNT11;P2RY2;GNA12;OR5AN1;DRD3;XCR1;FZD5;HTR5A;GNAQ;GNRH2;CDK1;RLN3;OR2A5;PDE7A;OR5C1;OR2A14
Apoptotic signaling in response to DNA damage	1/20	0.661171	0.866778	0.946968	0.391802	BCL2L1
Cell differentiation pathway	1/20	0.661171	0.866778	0.946968	0.391802	HDAC5
Chondroitin sulfate biosynthesis	1/20	0.661171	0.866778	0.946968	0.391802	CHPF2
[truncated: 274 more rows]

## Sheet: KEGG
Term	Overlap	P-value	Adjusted p-value	Odds Ratio	Combined Score	Genes
[truncated: 297 more rows]

## Sheet: GO Biolocical Processes
Term	Overlap	P-value	Adjusted p-value	Odds Ratio	Combined Score	Genes
[truncated: 3,253 more rows]

[truncated: 2 more sheets: GO Cellular Compartments, GO Molecular Function]
