# Supplementary material for: Transcriptome of Subcutaneous Adipose Tissue reflect Membrane Dysfunction and Impaired Oxidative Processes in T2D across Heterogenous Populations
Source: Research Square preprint supplement (doi:10.21203/rs.3.rs-7053974/v1), 2025-11-14
Supplement: Supplementary file 8 [file bffcb3bed4df6b94c12e6118.xlsx]

## Sheet: Gene symbols and names
Gene Symbols	PC1	PC2	Association ID	Ensemble ID	Names
ABCB7	-0.0907246	0.0133246	ILMN_1687840	ENSG00000131269	ATP binding cassette subfamily B member 7
ABCC9	-0.055118	0.0218618	ILMN_1751453	ENSG00000069431	ATP binding cassette subfamily C member 9
ABCC9	-0.055118	0.0218618	ILMN_2366473	ENSG00000069431	ATP binding cassette subfamily C member 9
ABHD12	-0.0240834	-0.0709563	ILMN_2245305	ENSG00000100997	abhydrolase domain containing 12, lysophospholipase
ABHD12	-0.0240834	-0.0709563	ILMN_2318685	ENSG00000100997	abhydrolase domain containing 12, lysophospholipase
ABHD12	-0.0240834	-0.0709563	ILMN_1745116	ENSG00000100997	abhydrolase domain containing 12, lysophospholipase
ACAT1	-0.078911	0.0751004	ILMN_1800008	ENSG00000075239	acetyl-CoA acetyltransferase 1
ACSS2	-0.0774987	0.0761339	ILMN_1714197	ENSG00000131069	acyl-CoA synthetase short chain family member 2
ACSS2	-0.0774987	0.0761339	ILMN_1697510	ENSG00000131069	acyl-CoA synthetase short chain family member 2
ACSS2	-0.0774987	0.0761339	ILMN_2254962	ENSG00000131069	acyl-CoA synthetase short chain family member 2
ACSS2	-0.0774987	0.0761339	ILMN_2336595	ENSG00000131069	acyl-CoA synthetase short chain family member 2
ACVR1C	-0.078927	0.0716134	ILMN_1689217	ENSG00000123612	activin A receptor type 1C
ADHFE1	-0.0817641	0.0374742	ILMN_2363634	ENSG00000147576	alcohol dehydrogenase iron containing 1
ADHFE1	-0.0817641	0.0374742	ILMN_1702858	ENSG00000147576	alcohol dehydrogenase iron containing 1
ALDH1A1	-0.0561973	0.0278403	ILMN_2096372	ENSG00000165092	aldehyde dehydrogenase 1 family member A1
ANG	-0.0913625	0.0326316	ILMN_2239408	ENSG00000214274	angiogenin
ANG	-0.0913625	0.0326316	ILMN_1760727	ENSG00000214274	angiogenin
ANG	-0.0913625	0.0326316	ILMN_1776602	ENSG00000214274	angiogenin
ANG	-0.0913625	0.0326316	ILMN_2408572	ENSG00000214274	angiogenin
ANG	-0.0913625	0.0326316	ILMN_2294978	ENSG00000214274	angiogenin
ANGPTL6	-0.0213876	-0.0454191	ILMN_1725518	ENSG00000130812	angiopoietin like 6
ANTXR2	-0.0682543	0.0656911	ILMN_1812926	ENSG00000163297	ANTXR cell adhesion molecule 2
APMAP	-0.0781212	0.0529433	ILMN_1674394	ENSG00000101474	adipocyte plasma membrane associated protein
APPL1	-0.050116	-0.013133	ILMN_1763730	ENSG00000157500	adaptor protein, phosphotyrosine interacting with PH domain and leucine zipper 1
ARHGAP24	-0.0181183	-0.0393638	ILMN_2352633	ENSG00000138639	Rho GTPase activating protein 24
ARHGAP24	-0.0181183	-0.0393638	ILMN_1801833	ENSG00000138639	Rho GTPase activating protein 24
ARHGAP24	-0.0181183	-0.0393638	ILMN_1765876	ENSG00000138639	Rho GTPase activating protein 24
ARHGAP24	-0.0181183	-0.0393638	ILMN_1775441	ENSG00000138639	Rho GTPase activating protein 24
ATP9B	-0.0249636	-0.0680785	ILMN_1658684	ENSG00000166377	ATPase phospholipid transporting 9B (putative)
ATRIP	-0.0534074	0.0444911	ILMN_2370464	ENSG00000164053	ATR interacting protein
ATRIP	-0.0534074	0.0444911	ILMN_1770955	ENSG00000164053	ATR interacting protein
ATRIP	-0.0534074	0.0444911	ILMN_1653896	ENSG00000164053	ATR interacting protein
ATRIP	-0.0534074	0.0444911	ILMN_1676997	ENSG00000164053	ATR interacting protein
BFAR	-0.0660397	0.0608293	ILMN_1814808	ENSG00000103429	bifunctional apoptosis regulator
BORCS5	-0.0292663	-0.0152795	ILMN_1651268	ENSG00000165714	BLOC-1 related complex subunit 5
BRAT1	-0.0576568	-0.0305613	ILMN_1804498	ENSG00000106009	BRCA1 associated ATM activator 1
BRINP3	-0.0445944	-0.00866579	ILMN_2092589	ENSG00000162670	BMP/retinoic acid inducible neural specific 3
BSDC1	-0.0547659	0.00749419	ILMN_1734483	ENSG00000160058	BSD domain containing 1
BUD13	-0.0717969	-0.0239106	ILMN_1749210	ENSG00000137656	BUD13 homolog
CAPRIN1	-0.00207394	0.105778	ILMN_1754145	ENSG00000135387	cell cycle associated protein 1
CAPRIN1	-0.00207394	0.105778	ILMN_1770676	ENSG00000135387	cell cycle associated protein 1
CAPRIN1	-0.00207394	0.105778	ILMN_1782897	ENSG00000135387	cell cycle associated protein 1
CBR1	-0.0297934	-0.0464626	ILMN_1809003	ENSG00000159228	carbonyl reductase 1
CCDC51	-0.06748	0.0416814	ILMN_1799579	ENSG00000164051	coiled-coil domain containing 51
CD302	-0.0531542	0.00916389	ILMN_2070940	ENSG00000241399	CD302 molecule
CD99	-0.0299344	-0.0532079	ILMN_2056032	ENSG00000292348	CD99 molecule (Xg blood group)
CD99	-0.0299344	-0.0532079	ILMN_2056032	ENSG00000002586	CD99 molecule (Xg blood group)
CDCP2	-0.0153282	-0.043607	ILMN_2118621	ENSG00000157211	CUB domain containing protein 2
CDKL5	-0.00536781	-0.0065249	ILMN_2377536	ENSG00000008086	cyclin dependent kinase like 5
CDKL5	-0.00536781	-0.0065249	ILMN_1680317	ENSG00000008086	cyclin dependent kinase like 5
CDKL5	-0.00536781	-0.0065249	ILMN_2277725	ENSG00000008086	cyclin dependent kinase like 5
CERCAM	-0.0189011	-0.0227156	ILMN_1750563	ENSG00000167123	cerebral endothelial cell adhesion molecule
CFAP251	-0.0259839	-0.0172495	ILMN_1800341	ENSG00000158023	cilia and flagella associated protein 251
CHCHD3	-0.0584871	0.0955327	ILMN_1673026	ENSG00000106554	coiled-coil-helix-coiled-coil-helix domain containing 3
CHP1	-0.0828914	0.0577937	ILMN_1779401	ENSG00000187446	calcineurin like EF-hand protein 1
CIPC	-0.0736548	0.0491397	ILMN_2097858	ENSG00000198894	CLOCK interacting pacemaker
CLPX	-0.0545876	0.0307417	ILMN_1709894	ENSG00000166855	caseinolytic mitochondrial matrix peptidase chaperone subunit X
CLU	-0.0513839	0.0523125	ILMN_1667058	ENSG00000120885	clusterin
CLU	-0.0513839	0.0523125	ILMN_1798298	ENSG00000120885	clusterin
CLU	-0.0513839	0.0523125	ILMN_1691483	ENSG00000120885	clusterin
COPS7B	-0.0594903	-0.0318677	ILMN_1784785	ENSG00000144524	COP9 signalosome subunit 7B
CRLS1	-0.0666318	0.09173	ILMN_1737685	ENSG00000088766	cardiolipin synthase 1
CSDE1	-0.00141427	0.107634	ILMN_1685796	ENSG00000009307	cold shock domain containing E1
CSDE1	-0.00141427	0.107634	ILMN_1683538	ENSG00000009307	cold shock domain containing E1
CTSF	-0.0450335	0.00556103	ILMN_1804955	ENSG00000174080	cathepsin F
CYB5A	-0.0710769	0.0850046	ILMN_2312194	ENSG00000166347	cytochrome b5 type A
CYB5A	-0.0710769	0.0850046	ILMN_1714167	ENSG00000166347	cytochrome b5 type A
CYB5R1	-0.0402888	-0.02385	ILMN_1729237	ENSG00000159348	cytochrome b5 reductase 1
DAP3	-0.054438	0.0571285	ILMN_1781680	ENSG00000132676	death associated protein 3
DCDC1	-0.035348	-0.0473012	ILMN_1729962	ENSG00000170959	doublecortin domain containing 1
DCDC1	-0.035348	-0.0473012	ILMN_2209671	ENSG00000170959	doublecortin domain containing 1
DCDC1	-0.035348	-0.0473012	ILMN_1783383	ENSG00000170959	doublecortin domain containing 1
DCLRE1C	-0.031365	-0.0661533	ILMN_1754211	ENSG00000152457	DNA cross-link repair 1C
DCLRE1C	-0.031365	-0.0661533	ILMN_1678464	ENSG00000152457	DNA cross-link repair 1C
DCLRE1C	-0.031365	-0.0661533	ILMN_2321931	ENSG00000152457	DNA cross-link repair 1C
DDX42	-0.068178	0.0446814	ILMN_1695983	ENSG00000198231	DEAD-box helicase 42
DDX42	-0.068178	0.0446814	ILMN_1674163	ENSG00000198231	DEAD-box helicase 42
DENND2D	-0.0529142	-0.0185075	ILMN_1707088	ENSG00000162777	DENN domain containing 2D
DHX40	-0.0734802	0.00213299	ILMN_2325008	ENSG00000108406	DEAH-box helicase 40
DHX40	-0.0734802	0.00213299	ILMN_2248589	ENSG00000108406	DEAH-box helicase 40
DSC2	-0.00933972	-0.0764416	ILMN_1663119	ENSG00000134755	desmocollin 2
DSC2	-0.00933972	-0.0764416	ILMN_2381257	ENSG00000134755	desmocollin 2
DTNB	-0.0415843	-0.0785685	ILMN_1798819	ENSG00000138101	dystrobrevin beta
EFHB	-0.0476795	0.0388141	ILMN_2199409	ENSG00000163576	EF-hand domain family member B
ERMAP	-0.048397	0.0288012	ILMN_1715013	ENSG00000164010	erythroblast membrane associated protein (Scianna blood group)
ERMAP	-0.048397	0.0288012	ILMN_1785387	ENSG00000164010	erythroblast membrane associated protein (Scianna blood group)
FAM13A	-0.0826506	0.0321283	ILMN_1800267	ENSG00000138640	family with sequence similarity 13 member A
FAM13A	-0.0826506	0.0321283	ILMN_2291092	ENSG00000138640	family with sequence similarity 13 member A
FAM13A	-0.0826506	0.0321283	ILMN_2401253	ENSG00000138640	family with sequence similarity 13 member A
FAM47E-STBD1	-0.0793128	0.0780676	ILMN_1673950	ENSG00000272414	FAM47E-STBD1 readthrough
FBXO3	-0.05626	0.0394813	ILMN_1672415	ENSG00000110429	F-box protein 3
FBXO3	-0.05626	0.0394813	ILMN_2273261	ENSG00000110429	F-box protein 3
FBXO3	-0.05626	0.0394813	ILMN_1729175	ENSG00000110429	F-box protein 3
FNTA	-0.0429798	0.100118	ILMN_1721704	ENSG00000168522	farnesyltransferase, CAAX box, alpha
FNTA	-0.0429798	0.100118	ILMN_1746494	ENSG00000168522	farnesyltransferase, CAAX box, alpha
FNTA	-0.0429798	0.100118	ILMN_2374191	ENSG00000168522	farnesyltransferase, CAAX box, alpha
FOXJ3	-0.083092	0.0157293	ILMN_2128668	ENSG00000198815	forkhead box J3
GABRE	-0.0515576	0.0149542	ILMN_2324202	ENSG00000102287	gamma-aminobutyric acid type A receptor subunit epsilon
GABRE	-0.0515576	0.0149542	ILMN_1784706	ENSG00000102287	gamma-aminobutyric acid type A receptor subunit epsilon
GLB1L	-0.0440989	-0.0214106	ILMN_2217513	ENSG00000163521	galactosidase beta 1 like
HNMT	-0.0426317	-0.0691029	ILMN_2284744	ENSG00000150540	histamine N-methyltransferase
HNMT	-0.0426317	-0.0691029	ILMN_1751789	ENSG00000150540	histamine N-methyltransferase
HNMT	-0.0426317	-0.0691029	ILMN_1790881	ENSG00000150540	histamine N-methyltransferase
HNMT	-0.0426317	-0.0691029	ILMN_1713685	ENSG00000150540	histamine N-methyltransferase
HNRNPA1P16	-0.0433862	-0.015138	ILMN_2191759	ENSG00000262333	heterogeneous nuclear ribonucleoprotein A1 pseudogene 16
ICE2	-0.0620609	0.0283069	ILMN_2346460	ENSG00000128915	interactor of little elongation complex ELL subunit 2
ICE2	-0.0620609	0.0283069	ILMN_1666610	ENSG00000128915	interactor of little elongation complex ELL subunit 2
ICE2	-0.0620609	0.0283069	ILMN_1718830	ENSG00000128915	interactor of little elongation complex ELL subunit 2
IL18BP	-0.00105564	-0.110375	ILMN_2334296	ENSG00000137496	interleukin 18 binding protein
IL18BP	-0.00105564	-0.110375	ILMN_1742318	ENSG00000137496	interleukin 18 binding protein
IL18BP	-0.00105564	-0.110375	ILMN_2356031	ENSG00000137496	interleukin 18 binding protein
IL18BP	-0.00105564	-0.110375	ILMN_2253759	ENSG00000137496	interleukin 18 binding protein
ISCU	-0.0770974	0.0552091	ILMN_1735432	ENSG00000136003	iron-sulfur cluster assembly enzyme
ISCU	-0.0770974	0.0552091	ILMN_2409062	ENSG00000136003	iron-sulfur cluster assembly enzyme
ISX	-0.0100277	-0.019922	ILMN_1756502	ENSG00000175329	intestine specific homeobox
ITGAD	-0.0116056	-0.105929	ILMN_1681945	ENSG00000156886	integrin subunit alpha D
JADE1	-0.0287438	0.0913917	ILMN_1736015	ENSG00000077684	jade family PHD finger 1
JADE1	-0.0287438	0.0913917	ILMN_1655194	ENSG00000077684	jade family PHD finger 1
JADE1	-0.0287438	0.0913917	ILMN_1794473	ENSG00000077684	jade family PHD finger 1
JRKL	-0.0412023	0.065259	ILMN_1696503	ENSG00000183340	JRK like
KCNIP3	-0.0335049	0.0614707	ILMN_2262644	ENSG00000115041	potassium voltage-gated channel interacting protein 3
KCNIP3	-0.0335049	0.0614707	ILMN_2350823	ENSG00000115041	potassium voltage-gated channel interacting protein 3
KCNIP3	-0.0335049	0.0614707	ILMN_1744403	ENSG00000115041	potassium voltage-gated channel interacting protein 3
KCTD3	-0.0445832	-0.0107323	ILMN_2134555	ENSG00000136636	potassium channel tetramerization domain containing 3
KIAA1191	-0.0692437	0.031771	ILMN_1749405	ENSG00000122203	KIAA1191
KIAA1191	-0.0692437	0.031771	ILMN_2376133	ENSG00000122203	KIAA1191
LIAS	-0.0906322	0.0198437	ILMN_1736077	ENSG00000121897	lipoic acid synthetase
LIAS	-0.0906322	0.0198437	ILMN_2393341	ENSG00000121897	lipoic acid synthetase
LINC00336	-0.0270305	-0.0114048	ILMN_1717726	ENSG00000197251	long intergenic non-protein coding RNA 336
LINC02875	-0.039364	-0.00985068	ILMN_1783682	ENSG00000187013	long intergenic non-protein coding RNA 2875
LRPAP1	-0.0703592	0.00670115	ILMN_1660341	ENSG00000163956	LDL receptor related protein associated protein 1
LSP1	-0.0125969	-0.100571	ILMN_2355225	ENSG00000130592	lymphocyte specific protein 1
LSP1	-0.0125969	-0.100571	ILMN_1798779	ENSG00000130592	lymphocyte specific protein 1
LSP1	-0.0125969	-0.100571	ILMN_1699836	ENSG00000130592	lymphocyte specific protein 1
LSP1	-0.0125969	-0.100571	ILMN_1791623	ENSG00000130592	lymphocyte specific protein 1
LSP1	-0.0125969	-0.100571	ILMN_1654778	ENSG00000130592	lymphocyte specific protein 1
MACROD1	-0.0729459	0.0691226	ILMN_1740960	ENSG00000133315	mono-ADP ribosylhydrolase 1
MAPK15	-0.0189592	-0.0410923	ILMN_1768506	ENSG00000181085	mitogen-activated protein kinase 15
MBTPS1	-0.0386899	0.0328504	ILMN_1767256	ENSG00000140943	membrane bound transcription factor peptidase, site 1
MBTPS1	-0.0386899	0.0328504	ILMN_1651719	ENSG00000140943	membrane bound transcription factor peptidase, site 1
MED7	-0.0516806	0.0293676	ILMN_2229170	ENSG00000155868	mediator complex subunit 7
MINDY3	-0.0849834	0.0542881	ILMN_1725594	ENSG00000148481	MINDY lysine 48 deubiquitinase 3
MOCS1	-0.0836743	0.0674682	ILMN_1798624	ENSG00000124615	molybdenum cofactor synthesis 1
MOCS1	-0.0836743	0.0674682	ILMN_2247988	ENSG00000124615	molybdenum cofactor synthesis 1
MOCS1	-0.0836743	0.0674682	ILMN_2323801	ENSG00000124615	molybdenum cofactor synthesis 1
MRNIP	-0.0492983	0.0647554	ILMN_2390227	ENSG00000161010	MRN complex interacting protein
MRNIP	-0.0492983	0.0647554	ILMN_2409879	ENSG00000161010	MRN complex interacting protein
MRNIP	-0.0492983	0.0647554	ILMN_1708015	ENSG00000161010	MRN complex interacting protein
MRNIP	-0.0492983	0.0647554	ILMN_1789909	ENSG00000161010	MRN complex interacting protein
MRPL1	-0.0830794	0.0190531	ILMN_2076658	ENSG00000169288	mitochondrial ribosomal protein L1
MRPL2	-0.0680913	0.0572254	ILMN_1763264	ENSG00000112651	mitochondrial ribosomal protein L2
MRPS26	-0.0649616	0.0488529	ILMN_1676026	ENSG00000125901	mitochondrial ribosomal protein S26
MRPS27	-0.0735376	0.0551183	ILMN_2138435	ENSG00000113048	mitochondrial ribosomal protein S27
MZT1	-0.0145914	-0.0423269	ILMN_1809662	ENSG00000204899	mitotic spindle organizing protein 1
MZT1	-0.0145914	-0.0423269	ILMN_2226415	ENSG00000204899	mitotic spindle organizing protein 1
NAGLU	-0.0685801	0.0137269	ILMN_1694980	ENSG00000108784	N-acetyl-alpha-glucosaminidase
NARS1	-0.0566825	0.00435843	ILMN_1732216	ENSG00000134440	asparaginyl-tRNA synthetase 1
NEDD4L	-0.053225	0.0650864	ILMN_1733627	ENSG00000049759	NEDD4 like E3 ubiquitin protein ligase
NEK11	-0.022158	-0.0158047	ILMN_2365223	ENSG00000114670	NIMA related kinase 11
NEK11	-0.022158	-0.0158047	ILMN_1788149	ENSG00000114670	NIMA related kinase 11
NSL1	-0.0256376	-0.0224285	ILMN_2376160	ENSG00000117697	NSL1 component of MIS12 kinetochore complex
NSL1	-0.0256376	-0.0224285	ILMN_1739210	ENSG00000117697	NSL1 component of MIS12 kinetochore complex
NSL1	-0.0256376	-0.0224285	ILMN_2276820	ENSG00000117697	NSL1 component of MIS12 kinetochore complex
OPCML	-0.0459969	0.0275102	ILMN_1741698	ENSG00000183715	opioid binding protein/cell adhesion molecule like
OPCML	-0.0459969	0.0275102	ILMN_1682301	ENSG00000183715	opioid binding protein/cell adhesion molecule like
ORMDL3	-0.0865421	0.0626996	ILMN_1662174	ENSG00000172057	ORMDL sphingolipid biosynthesis regulator 3
OSBP	-0.0575187	0.0458532	ILMN_1706376	ENSG00000110048	oxysterol binding protein
P2RY6	-0.0203033	-0.0690048	ILMN_1790029	ENSG00000171631	pyrimidinergic receptor P2Y6
P2RY6	-0.0203033	-0.0690048	ILMN_1782275	ENSG00000171631	pyrimidinergic receptor P2Y6
P2RY6	-0.0203033	-0.0690048	ILMN_1660031	ENSG00000171631	pyrimidinergic receptor P2Y6
PARK7	-0.0872315	0.0449021	ILMN_1744713	ENSG00000116288	Parkinsonism associated deglycase
PCCA	-0.0787978	0.0829951	ILMN_1714384	ENSG00000175198	propionyl-CoA carboxylase subunit alpha
PEG10	-0.0169342	-0.0367815	ILMN_2297626	ENSG00000242265	paternally expressed 10
PEG10	-0.0169342	-0.0367815	ILMN_1670019	ENSG00000242265	paternally expressed 10
PIGP	-0.0546623	0.0674339	ILMN_1708451	ENSG00000185808	phosphatidylinositol glycan anchor biosynthesis class P
PIGP	-0.0546623	0.0674339	ILMN_1764871	ENSG00000185808	phosphatidylinositol glycan anchor biosynthesis class P
PIGP	-0.0546623	0.0674339	ILMN_1774949	ENSG00000185808	phosphatidylinositol glycan anchor biosynthesis class P
PIWIL2	-0.0557592	-0.00498353	ILMN_1755350	ENSG00000197181	piwi like RNA-mediated gene silencing 2
PIWIL2	-0.0557592	-0.00498353	ILMN_1711818	ENSG00000197181	piwi like RNA-mediated gene silencing 2
PLA2G5	-0.0577548	-0.0236112	ILMN_1807171	ENSG00000127472	phospholipase A2 group V
PNMA6A	-0.0499398	0.0205087	ILMN_1759613	ENSG00000235961	PNMA family member 6A
PPA2	-0.0421677	-0.0350366	ILMN_1687785	ENSG00000138777	inorganic pyrophosphatase 2
PPA2	-0.0421677	-0.0350366	ILMN_2342455	ENSG00000138777	inorganic pyrophosphatase 2
PPA2	-0.0421677	-0.0350366	ILMN_1755041	ENSG00000138777	inorganic pyrophosphatase 2
PRPS2	-0.0568735	-0.0707716	ILMN_1758104	ENSG00000101911	phosphoribosyl pyrophosphate synthetase 2
PRPS2	-0.0568735	-0.0707716	ILMN_2399431	ENSG00000101911	phosphoribosyl pyrophosphate synthetase 2
PUM1	-0.069186	-0.0111838	ILMN_1783424	ENSG00000134644	pumilio RNA binding family member 1
PUM1	-0.069186	-0.0111838	ILMN_2401155	ENSG00000134644	pumilio RNA binding family member 1
PYGB	-0.0704919	0.0432844	ILMN_1778360	ENSG00000100994	glycogen phosphorylase B
RBM15B	-0.0653752	0.0141002	ILMN_1673024	ENSG00000259956	RNA binding motif protein 15B
REXO5	-0.0694738	0.0251627	ILMN_1796923	ENSG00000005189	RNA exonuclease 5
RFTN1	-0.0738966	0.0311784	ILMN_1800787	ENSG00000131378	raftlin, lipid raft linker 1
RGS3	-0.0337528	0.0645101	ILMN_1724349	ENSG00000138835	regulator of G protein signaling 3
RGS3	-0.0337528	0.0645101	ILMN_2248655	ENSG00000138835	regulator of G protein signaling 3
RGS3	-0.0337528	0.0645101	ILMN_1731478	ENSG00000138835	regulator of G protein signaling 3
RGS3	-0.0337528	0.0645101	ILMN_1763371	ENSG00000138835	regulator of G protein signaling 3
RGS3	-0.0337528	0.0645101	ILMN_1728711	ENSG00000138835	regulator of G protein signaling 3
RGS3	-0.0337528	0.0645101	ILMN_2260224	ENSG00000138835	regulator of G protein signaling 3
RNASE4	-0.080302	0.0483544	ILMN_2239408	ENSG00000258818	ribonuclease A family member 4
RNASE4	-0.080302	0.0483544	ILMN_2408572	ENSG00000258818	ribonuclease A family member 4
RNASE4	-0.080302	0.0483544	ILMN_1776602	ENSG00000258818	ribonuclease A family member 4
RNF121	-0.0836625	-0.00208662	ILMN_1742318	ENSG00000137522	ring finger protein 121
RNF121	-0.0836625	-0.00208662	ILMN_2356031	ENSG00000137522	ring finger protein 121
RPP25L	-0.0868953	0.0310492	ILMN_1766793	ENSG00000164967	ribonuclease P/MRP subunit p25 like
RPP25L	-0.0868953	0.0310492	ILMN_2391345	ENSG00000164967	ribonuclease P/MRP subunit p25 like
RPP25L	-0.0868953	0.0310492	ILMN_1683175	ENSG00000164967	ribonuclease P/MRP subunit p25 like
RSPO3	-0.0521998	0.000545723	ILMN_1681983	ENSG00000146374	R-spondin 3
S100G	-0.0326123	-0.0132411	ILMN_1715695	ENSG00000169906	S100 calcium binding protein G
SCN2A	-0.0238672	0.00320265	ILMN_1732782	ENSG00000136531	sodium voltage-gated channel alpha subunit 2
SCN2A	-0.0238672	0.00320265	ILMN_2271762	ENSG00000136531	sodium voltage-gated channel alpha subunit 2
SCN2A	-0.0238672	0.00320265	ILMN_2366915	ENSG00000136531	sodium voltage-gated channel alpha subunit 2
SECISBP2L	-0.0676021	0.00750495	ILMN_1784333	ENSG00000138593	SECIS binding protein 2 like
SIGMAR1	-0.0586841	0.0549491	ILMN_1717925	ENSG00000147955	sigma non-opioid intracellular receptor 1
SIGMAR1	-0.0586841	0.0549491	ILMN_2398489	ENSG00000147955	sigma non-opioid intracellular receptor 1
SIRPG	-0.0442949	-0.041767	ILMN_1676780	ENSG00000089012	signal regulatory protein gamma
SIRPG	-0.0442949	-0.041767	ILMN_1771801	ENSG00000089012	signal regulatory protein gamma
SIRPG	-0.0442949	-0.041767	ILMN_2383058	ENSG00000089012	signal regulatory protein gamma
SLC2A12	-0.0395994	-0.0926505	ILMN_1766261	ENSG00000146411	solute carrier family 2 member 12
SMG8	-0.0461708	0.0383554	ILMN_1807533	ENSG00000167447	SMG8 nonsense mediated mRNA decay factor
SNRNP35	-0.0696375	-0.000358185	ILMN_2395285	ENSG00000184209	small nuclear ribonucleoprotein U11/U12 subunit 35
SNRNP35	-0.0696375	-0.000358185	ILMN_1772845	ENSG00000184209	small nuclear ribonucleoprotein U11/U12 subunit 35
SP5	-0.0384486	-0.0329194	ILMN_1775956	ENSG00000204335	Sp5 transcription factor
SPNS1	-0.0305185	-0.0785	ILMN_1681016	ENSG00000169682	SPNS lysolipid transporter 1, lysophospholipid
SPNS1	-0.0305185	-0.0785	ILMN_2281320	ENSG00000169682	SPNS lysolipid transporter 1, lysophospholipid
SPSB2	-0.0587183	0.00360203	ILMN_1787541	ENSG00000111671	splA/ryanodine receptor domain and SOCS box containing 2
SRP68	-0.0691781	0.067229	ILMN_1703524	ENSG00000167881	signal recognition particle 68
ST13	-0.091913	0.0560678	ILMN_1765204	ENSG00000100380	ST13 Hsp70 interacting protein
ST13P7	-0.0667189	0.08829	ILMN_2080158	ENSG00000237821	ST13, Hsp70 interacting protein pseudogene 7
ST3GAL3	-0.0572704	0.0865765	ILMN_1699472	ENSG00000126091	ST3 beta-galactoside alpha-2,3-sialyltransferase 3
ST3GAL3	-0.0572704	0.0865765	ILMN_2350315	ENSG00000126091	ST3 beta-galactoside alpha-2,3-sialyltransferase 3
STBD1	-0.0793128	0.0780676	ILMN_1673950	ENSG00000118804	starch binding domain 1
STK24	-0.0522902	0.0322565	ILMN_1695773	ENSG00000102572	serine/threonine kinase 24
STK24	-0.0522902	0.0322565	ILMN_1655163	ENSG00000102572	serine/threonine kinase 24
STK24	-0.0522902	0.0322565	ILMN_1702723	ENSG00000102572	serine/threonine kinase 24
SWT1	-0.0481902	0.0295601	ILMN_1692834	ENSG00000116668	SWT1 RNA endoribonuclease homolog
SZRD1	-0.00887308	0.0977856	ILMN_1707503	ENSG00000055070	SUZ RNA binding domain containing 1
TACO1	-0.0726788	0.0418946	ILMN_1685112	ENSG00000136463	translational activator of cytochrome c oxidase I
TATDN1	-0.0677188	0.0248577	ILMN_2179397	ENSG00000147687	TatD DNase domain containing 1
THOC5	-0.0785474	-0.0169853	ILMN_1667883	ENSG00000100296	THO complex subunit 5
THOC5	-0.0785474	-0.0169853	ILMN_2393169	ENSG00000100296	THO complex subunit 5
TMED7	-0.0315216	0.0060485	ILMN_2186482	ENSG00000134970	transmembrane p24 trafficking protein 7
TMEM183A	-0.0520419	-0.00496969	ILMN_1752589	ENSG00000163444	transmembrane protein 183A
TMEM183AP3	-0.0520419	-0.00496969	ILMN_1752589	ENSG00000260382	TMEM183A pseudogene 3
TMEM80	-0.0679003	0.0266331	ILMN_1706718	ENSG00000177042	transmembrane protein 80
TMEM80	-0.0679003	0.0266331	ILMN_1689868	ENSG00000177042	transmembrane protein 80
TMEM80	-0.0679003	0.0266331	ILMN_1708482	ENSG00000177042	transmembrane protein 80
TOMM70	-0.0645444	0.0852266	ILMN_1746426	ENSG00000154174	translocase of outer mitochondrial membrane 70
TP53I13	-0.0814354	-0.0232264	ILMN_1666178	ENSG00000167543	tumor protein p53 inducible protein 13
TREX1	-0.0665033	0.0438236	ILMN_1653896	ENSG00000213689	three prime repair exonuclease 1
TREX1	-0.0665033	0.0438236	ILMN_2370464	ENSG00000213689	three prime repair exonuclease 1
TRIM14	-0.0260126	-0.0340383	ILMN_1772689	ENSG00000106785	tripartite motif containing 14
TRIM14	-0.0260126	-0.0340383	ILMN_1677542	ENSG00000106785	tripartite motif containing 14
TRIM14	-0.0260126	-0.0340383	ILMN_1713542	ENSG00000106785	tripartite motif containing 14
TRIM14	-0.0260126	-0.0340383	ILMN_2383290	ENSG00000106785	tripartite motif containing 14
TRIM24	-0.0654532	0.0372645	ILMN_2405031	ENSG00000122779	tripartite motif containing 24
TRIM24	-0.0654532	0.0372645	ILMN_1711247	ENSG00000122779	tripartite motif containing 24
TRIM24	-0.0654532	0.0372645	ILMN_1799642	ENSG00000122779	tripartite motif containing 24
TRRAP	-0.0191609	-0.0845473	ILMN_1660368	ENSG00000196367	transformation/transcription domain associated protein
UBFD1	-0.0142357	0.120471	ILMN_1700811	ENSG00000103353	ubiquitin family domain containing 1
VIRMA	-0.0459213	0.0507179	ILMN_1741841	ENSG00000164944	vir like m6A methyltransferase associated
WLS	-0.0712195	-0.00506976	ILMN_1660549	ENSG00000116729	Wnt ligand secretion mediator
WLS	-0.0712195	-0.00506976	ILMN_2399769	ENSG00000116729	Wnt ligand secretion mediator
WLS	-0.0712195	-0.00506976	ILMN_2283325	ENSG00000116729	Wnt ligand secretion mediator
ZBTB45	-0.0660105	0.00837258	ILMN_1661484	ENSG00000119574	zinc finger and BTB domain containing 45
ZBTB6	-0.0522153	0.00160832	ILMN_1727218	ENSG00000186130	zinc finger and BTB domain containing 6
ZNF446	-0.00469467	-0.053962	ILMN_1745784	ENSG00000083838	zinc finger protein 446
ZNF446	-0.00469467	-0.053962	ILMN_1743767	ENSG00000083838	zinc finger protein 446

## Sheet: Unique Gene symbols
ABCB7
ABCC9
ABHD12
ACAT1
ACSS2
ACVR1C
ADHFE1
ALDH1A1
ANG
ANGPTL6
ANTXR2
APMAP
APPL1
ARHGAP24
ATP9B
ATRIP
BFAR
BORCS5
BRAT1
BRINP3
BSDC1
BUD13
CAPRIN1
CBR1
CCDC51
CD302
CD99
CDCP2
CDKL5
CERCAM
CFAP251
CHCHD3
CHP1
CIPC
CLPX
CLU
COPS7B
CRLS1
CSDE1
CTSF
CYB5A
CYB5R1
DAP3
DCDC1
DCLRE1C
DDX42
DENND2D
DHX40
DSC2
DTNB
EFHB
ERMAP
FAM13A
FAM47E-STBD1
FBXO3
FNTA
FOXJ3
GABRE
GLB1L
HNMT
HNRNPA1P16
ICE2
IL18BP
ISCU
ISX
ITGAD
JADE1
JRKL
KCNIP3
KCTD3
KIAA1191
LIAS
LINC00336
LINC02875
LRPAP1
LSP1
MACROD1
MAPK15
MBTPS1
MED7
MINDY3
MOCS1
MRNIP
MRPL1
MRPL2
MRPS26
MRPS27
MZT1
NAGLU
NARS1
NEDD4L
NEK11
NSL1
OPCML
ORMDL3
OSBP
P2RY6
PARK7
PCCA
PEG10
PIGP
PIWIL2
PLA2G5
PNMA6A
PPA2
PRPS2
PUM1
PYGB
RBM15B
REXO5
RFTN1
RGS3
RNASE4
RNF121
RPP25L
RSPO3
S100G
SCN2A
SECISBP2L
SIGMAR1
SIRPG
SLC2A12
SMG8
SNRNP35
SP5
SPNS1
SPSB2
SRP68
ST13
ST13P7
ST3GAL3
STBD1
STK24
SWT1
SZRD1
TACO1
TATDN1
THOC5
TMED7
TMEM183A
TMEM183AP3
TMEM80
TOMM70
TP53I13
TREX1
TRIM14
TRIM24
TRRAP
UBFD1
VIRMA
WLS
ZBTB45
ZBTB6
ZNF446

## Sheet: Reactome
Term	Overlap	P-value	Adjusted P-value	Odds Ratio	Combined Score	Genes
Mitochondrial Translation Elongation	5/91	0.000692525	0.0872581	7.71032	56.0938	MRPL2;MRPS26;MRPL1;MRPS27;DAP3
Mitochondrial Translation Initiation	5/91	0.000692525	0.0872581	7.71032	56.0938	MRPL2;MRPS26;MRPL1;MRPS27;DAP3
Mitochondrial Translation Termination	5/91	0.000692525	0.0872581	7.71032	56.0938	MRPL2;MRPS26;MRPL1;MRPS27;DAP3
Mitochondrial Translation	5/97	0.00092495	0.0874078	7.20528	50.3344	MRPL2;MRPS26;MRPL1;MRPS27;DAP3
Translation	8/302	0.00240128	0.181537	3.64402	21.9798	MRPL2;MRPS26;MRPL1;MRPS27;NARS1;PPA2;SRP68;DAP3
Ethanol Oxidation	2/12	0.0036958	0.232835	26.1	146.175	ACSS2;ALDH1A1
Metabolism of Carbohydrates	7/290	0.00730004	0.386284	3.29177	16.1951	PRPS2;PYGB;NAGLU;GLB1L;ALDH1A1;CHP1;ST3GAL3
Acyl Chain Remodelling of PG	2/18	0.00831228	0.386284	16.3076	78.1136	PLA2G5;CRLS1
Sphingolipid Metabolism	4/107	0.00945261	0.386284	5.11146	23.8269	GLB1L;OSBP;ORMDL3;ST3GAL3
Maturation of TCA Enzymes and Regulation of TCA Cycle	2/20	0.0102191	0.386284	14.4942	66.4338	ISCU;ACAT1
HS-GAG Degradation	2/24	0.0145496	0.499976	11.8565	50.1551	GLB1L;NAGLU
Glycosaminoglycan Metabolism	4/127	0.0168357	0.530324	4.27599	17.4642	NAGLU;GLB1L;CHP1;ST3GAL3
Metabolism	25/2181	0.0275051	0.591409	1.59012	5.71391	PRPS2;PYGB;ACSS2;ABCB7;TACO1;PLA2G5;HNMT;ACAT1;NAGLU;OSBP;ORMDL3;CHP1;ST3GAL3;CBR1;CYB5A;MBTPS1;ADHFE1;CRLS1;MED7;PPA2;PCCA;GLB1L;ALDH1A1;MOCS1;ISCU
Citric Acid Cycle (TCA Cycle)	2/34	0.0281319	0.591409	8.1472	29.0924	ISCU;ACAT1
Keratan Sulfate Keratin Metabolism	2/36	0.031279	0.591409	7.66718	26.5653	GLB1L;ST3GAL3
Metabolism of Lipids	11/758	0.0327432	0.591409	1.96674	6.7244	CBR1;MBTPS1;PCCA;GLB1L;OSBP;ORMDL3;PLA2G5;CRLS1;MED7;ACAT1;ST3GAL3
Sphingolipid De Novo Biosynthesis	2/37	0.0329023	0.591409	7.44774	25.4282	ORMDL3;OSBP
Apoptotic Cleavage of Cellular Proteins	2/38	0.034558	0.591409	7.2405	24.3651	FNTA;STK24
Fructose Catabolism	1/5	0.0379152	0.591409	32.4216	106.096	ALDH1A1
Arachidonate Production From DAG	1/5	0.0379152	0.591409	32.4216	106.096	ABHD12
Propionyl-CoA Catabolism	1/5	0.0379152	0.591409	32.4216	106.096	PCCA
Regulation of NPAS4 Gene Transcription	1/5	0.0379152	0.591409	32.4216	106.096	KCNIP3
tRNA Aminoacylation	2/42	0.041493	0.591409	6.51513	20.7327	NARS1;PPA2
Molybdenum Cofactor Biosynthesis	1/6	0.0453251	0.591409	25.9359	80.2431	MOCS1
RUNX1 Regulates Transcription of Genes Involved in WNT Signaling	1/6	0.0453251	0.591409	25.9359	80.2431	RSPO3
Fructose Metabolism	1/7	0.0526782	0.591409	21.6122	63.6167	ALDH1A1
Phase 1 - Inactivation of Fast Na+ Channels	1/7	0.0526782	0.591409	21.6122	63.6167	KCNIP3
Defective HLCS Causes Multiple Carboxylase Deficiency	1/7	0.0526782	0.591409	21.6122	63.6167	PCCA
Histidine Catabolism	1/8	0.0599752	0.591409	18.5238	52.1228	HNMT
Synthesis of Ketone Bodies	1/8	0.0599752	0.591409	18.5238	52.1228	ACAT1
Interleukin-18 Signaling	1/8	0.0599752	0.591409	18.5238	52.1228	IL18BP
Terminal Pathway of Complement	1/8	0.0599752	0.591409	18.5238	52.1228	CLU
Defective ST3GAL3 Causes MCT12 and EIEE15	1/8	0.0599752	0.591409	18.5238	52.1228	ST3GAL3
Defects in Biotin (Btn) Metabolism	1/8	0.0599752	0.591409	18.5238	52.1228	PCCA
Metabolism of Ingested SeMet, Sec, MeSec Into H2Se	1/8	0.0599752	0.591409	18.5238	52.1228	HNMT
Vitamin C (Ascorbate) Metabolism	1/8	0.0599752	0.591409	18.5238	52.1228	CYB5A
Apoptotic Execution Phase	2/52	0.0608217	0.591409	5.20947	14.5855	FNTA;STK24
mRNA Splicing - Minor Pathway	2/53	0.0628965	0.591409	5.10707	14.1275	DDX42;SNRNP35
CREB3 Factors Activate Genes	1/9	0.0672162	0.591409	16.2075	43.7577	MBTPS1
Heparan Sulfate Heparin (HS-GAG) Metabolism	2/57	0.0714287	0.591409	4.73469	12.4951	NAGLU;GLB1L
Glycosphingolipid Metabolism	2/58	0.0736176	0.591409	4.64991	12.131	GLB1L;ST3GAL3
Caspase Activation via Dependence Receptors in the Absence of Ligand	1/10	0.0744019	0.591409	14.406	37.4306	APPL1
Protein Lipoylation	1/10	0.0744019	0.591409	14.406	37.4306	LIAS
Ketone Body Metabolism	1/10	0.0744019	0.591409	14.406	37.4306	ACAT1
Maturation of Protein 3A 9683673	1/10	0.0744019	0.591409	14.406	37.4306	ST3GAL3
Maturation of Protein 3A 9694719	1/10	0.0744019	0.591409	14.406	37.4306	ST3GAL3
Metabolism of Water-Soluble Vitamins and Cofactors	3/127	0.0749799	0.591409	3.1599	8.18584	CYB5A;PCCA;MOCS1
Cardiac Conduction	3/130	0.0791682	0.591409	3.08479	7.82358	KCNIP3;ABCC9;SCN2A
Mucopolysaccharidoses	1/11	0.0815325	0.591409	12.9647	32.4993	NAGLU
Biotin Transport and Metabolism	1/11	0.0815325	0.591409	12.9647	32.4993	PCCA
Erythrocytes Take up Carbon Dioxide and Release Oxygen	1/12	0.0886086	0.591409	11.7855	28.5625	CYB5R1
ATF6 (ATF6-alpha) Activates Chaperones	1/12	0.0886086	0.591409	11.7855	28.5625	MBTPS1
O2 CO2 Exchange in Erythrocytes	1/12	0.0886086	0.591409	11.7855	28.5625	CYB5R1
P2Y Receptors	1/12	0.0886086	0.591409	11.7855	28.5625	P2RY6
Hyaluronan Uptake and Degradation	1/12	0.0886086	0.591409	11.7855	28.5625	CHP1
Regulation of Signaling by NODAL	1/12	0.0886086	0.591409	11.7855	28.5625	ACVR1C
Mitochondrial Protein Import	2/65	0.0895149	0.591409	4.13179	9.97145	TOMM70;CHCHD3
IRF3-mediated Induction of Type I IFN	1/13	0.0956305	0.591409	10.8028	25.3571	TREX1
Cytosolic Iron-Sulfur Cluster Assembly	1/13	0.0956305	0.591409	10.8028	25.3571	ABCB7
Diseases of Branched-Chain Amino Acid Catabolism	1/13	0.0956305	0.591409	10.8028	25.3571	ACAT1
Mitochondrial Iron-Sulfur Cluster Biogenesis	1/13	0.0956305	0.591409	10.8028	25.3571	ISCU
Glycogen Breakdown (Glycogenolysis)	1/14	0.102599	0.591409	9.97134	22.704	PYGB
Regulation of NPAS4 Gene Expression	1/14	0.102599	0.591409	9.97134	22.704	KCNIP3
Uptake and Function of Anthrax Toxins	1/14	0.102599	0.591409	9.97134	22.704	ANTXR2
RHOA GTPase Cycle	3/149	0.107925	0.591409	2.68076	5.96823	STBD1;FAM13A;ARHGAP24
Pentose Phosphate Pathway	1/15	0.109514	0.591409	9.25864	20.4774	PRPS2
Synthesis of Prostaglandins (PG) and Thromboxanes (TX)	1/15	0.109514	0.591409	9.25864	20.4774	CBR1
Keratan Sulfate Degradation	1/15	0.109514	0.591409	9.25864	20.4774	GLB1L
Regulation of Innate Immune Responses to Cytosolic DNA	1/15	0.109514	0.591409	9.25864	20.4774	TREX1
Metabolism of Proteins	21/2067	0.114052	0.591409	1.37367	2.98238	TOMM70;MBTPS1;MRPS26;MRPS27;TRRAP;PIGP;COPS7B;PARK7;SRP68;LIAS;CLPX;ACAT1;SPSB2;MRPL2;MRPL1;NARS1;PPA2;TMED7;DAP3;ST3GAL3;OPCML
STING Mediated Induction of Host Immune Responses	1/16	0.116375	0.591409	8.64096	18.5861	TREX1
Signal Regulatory Protein Family Interactions	1/16	0.116375	0.591409	8.64096	18.5861	SIRPG
Nucleotide-like (Purinergic) Receptors	1/16	0.116375	0.591409	8.64096	18.5861	P2RY6
Acyl Chain Remodelling of PI	1/17	0.123185	0.591409	8.10049	16.963	PLA2G5
Signaling by Activin	1/17	0.123185	0.591409	8.10049	16.963	ACVR1C
Hyaluronan Metabolism	1/17	0.123185	0.591409	8.10049	16.963	CHP1
Translation of Replicase and Assembly of the Replication Transcription Complex 9694676	1/17	0.123185	0.591409	8.10049	16.963	ISCU
Signaling by Cytosolic FGFR1 Fusion Mutants	1/18	0.129942	0.591409	7.62361	15.5572	TRIM24
Pre-NOTCH Processing in Golgi	1/18	0.129942	0.591409	7.62361	15.5572	ST3GAL3
Synthesis of Glycosylphosphatidylinositol (GPI)	1/18	0.129942	0.591409	7.62361	15.5572	PIGP
Lewis Blood Group Biosynthesis	1/18	0.129942	0.591409	7.62361	15.5572	ST3GAL3
Protein Localization	3/164	0.133068	0.591409	2.42915	4.89934	TOMM70;CYB5A;CHCHD3
Assembly of Active LPL and LIPC Lipase Complexes	1/19	0.136647	0.591409	7.19971	14.33	MBTPS1
Glycosphingolipid Biosynthesis	1/19	0.136647	0.591409	7.19971	14.33	ST3GAL3
Apoptosis	3/168	0.140092	0.591409	2.36978	4.6577	FNTA;STK24;APPL1
Aerobic Respiration and Respiratory Electron Transport	4/260	0.141343	0.591409	2.04062	3.99261	TACO1;ADHFE1;ISCU;ACAT1
Diseases of Metabolism	4/264	0.14696	0.591409	2.00882	3.8521	NAGLU;PCCA;ACAT1;ST3GAL3
Branched-chain Amino Acid Catabolism	1/21	0.149905	0.591409	6.47908	12.2957	ACAT1
Interleukin-37 Signaling	1/21	0.149905	0.591409	6.47908	12.2957	IL18BP
Regulation of FZD by Ubiquitination	1/21	0.149905	0.591409	6.47908	12.2957	RSPO3
Mitochondrial tRNA Aminoacylation	1/21	0.149905	0.591409	6.47908	12.2957	PPA2
Selective Autophagy	2/89	0.150038	0.591409	2.98835	5.66851	TOMM70;PARK7
ABC-family Proteins Mediated Transport	2/90	0.152713	0.591409	2.95425	5.55161	ABCB7;ABCC9
Acyl Chain Remodelling of PS	1/22	0.156457	0.591409	6.17025	11.4456	PLA2G5
Blood Group Systems Biosynthesis	1/22	0.156457	0.591409	6.17025	11.4456	ST3GAL3
Cellular Hexose Transport	1/22	0.156457	0.591409	6.17025	11.4456	SLC2A12
Chaperone Mediated Autophagy	1/22	0.156457	0.591409	6.17025	11.4456	PARK7
RA Biosynthesis Pathway	1/22	0.156457	0.591409	6.17025	11.4456	ALDH1A1
Insertion of Tail-Anchored Proteins Into the Endoplasmic Reticulum Membrane	1/22	0.156457	0.591409	6.17025	11.4456	CYB5A
Defects in Vitamin and Cofactor Metabolism	1/22	0.156457	0.591409	6.17025	11.4456	PCCA
Post-translational Modification Synthesis of GPI-anchored Proteins	2/93	0.160793	0.601781	2.85642	5.22049	PIGP;OPCML
Signaling by NODAL	1/23	0.16296	0.60391	5.88948	10.685	ACVR1C
RAS Processing	1/24	0.169412	0.612235	5.63313	10.0012	FNTA
Cytosolic tRNA Aminoacylation	1/24	0.169412	0.612235	5.63313	10.0012	NARS1
Mitochondrial Biogenesis	2/97	0.171685	0.612235	2.7356	4.82038	CHCHD3;ACSS2
Mitochondrial Protein Degradation	2/97	0.171685	0.612235	2.7356	4.82038	CLPX;ACAT1
Glycogen Metabolism	1/25	0.175816	0.614823	5.39815	9.38371	PYGB
Complex III Assembly	1/25	0.175816	0.614823	5.39815	9.38371	ISCU
Processing of Capped Intron-Containing Pre-mRNA	4/285	0.177799	0.614823	1.8567	3.20672	DDX42;BUD13;SNRNP35;THOC5
Termination of O-glycan Biosynthesis	1/26	0.18217	0.614823	5.18196	8.82393	ST3GAL3
Downregulation of TGF-beta Receptor Signaling	1/26	0.18217	0.614823	5.18196	8.82393	NEDD4L
WNT Ligand Biogenesis and Trafficking	1/26	0.18217	0.614823	5.18196	8.82393	WLS
Acyl Chain Remodelling of PC	1/27	0.188475	0.623451	4.9824	8.31458	PLA2G5
Effects of PIP2 Hydrolysis	1/27	0.188475	0.623451	4.9824	8.31458	ABHD12
Phase I - Functionalization of Compounds	2/105	0.193806	0.623451	2.5221	4.13851	ACSS2;ALDH1A1
tRNA-derived Small RNA (tsRNA or tRNA-related Fragment, tRF) Biogenesis	1/28	0.194732	0.623451	4.79763	7.84954	ANG
Caspase Activation via Extrinsic Apoptotic Signalling Pathway	1/28	0.194732	0.623451	4.79763	7.84954	APPL1
Keratan Sulfate Biosynthesis	1/28	0.194732	0.623451	4.79763	7.84954	ST3GAL3
Metabolism of Vitamins and Cofactors	3/198	0.196272	0.623451	2.00214	3.26	CYB5A;PCCA;MOCS1
Acyl Chain Remodelling of PE	1/29	0.200942	0.625724	4.62605	7.42361	PLA2G5
PIWI-interacting RNA (piRNA) Biogenesis	1/29	0.200942	0.625724	4.62605	7.42361	PIWIL2
HATs Acetylate Histones	2/108	0.202196	0.625724	2.45035	3.91693	TRRAP;JADE1
Programmed Cell Death	3/202	0.204149	0.625724	1.9615	3.11663	FNTA;STK24;APPL1
Muscle Contraction	3/204	0.208115	0.625724	1.94178	3.04794	KCNIP3;ABCC9;SCN2A
FGFR1 Mutant Receptor Activation	1/31	0.213218	0.625724	4.31721	6.672	TRIM24
Signaling by CSF1 (M-CSF) in Myeloid Cells	1/31	0.213218	0.625724	4.31721	6.672	THOC5
Interaction Between L1 and Ankyrins	1/31	0.213218	0.625724	4.31721	6.672	SCN2A
Downregulation of SMAD2 3 SMAD4 Transcriptional Activity	1/31	0.213218	0.625724	4.31721	6.672	NEDD4L
PINK1-PRKN Mediated Mitophagy	1/32	0.219285	0.625724	4.17774	6.33922	TOMM70
Phase 0 - Rapid Depolarisation	1/32	0.219285	0.625724	4.17774	6.33922	SCN2A
Sialic Acid Metabolism	1/33	0.225307	0.625724	4.04698	6.03118	ST3GAL3
Synthesis of Bile Acids and Bile Salts	1/33	0.225307	0.625724	4.04698	6.03118	OSBP
Inactivation, Recovery and Regulation of the Phototransduction Cascade	1/33	0.225307	0.625724	4.04698	6.03118	FNTA
Cristae Formation	1/33	0.225307	0.625724	4.04698	6.03118	CHCHD3
mRNA Splicing	3/215	0.230223	0.625724	1.84	2.70242	DDX42;BUD13;SNRNP35
Plasma Lipoprotein Remodeling	1/34	0.231282	0.625724	3.92414	5.74542	MBTPS1
The Phototransduction Cascade	1/34	0.231282	0.625724	3.92414	5.74542	FNTA
Late Endosomal Microautophagy	1/34	0.231282	0.625724	3.92414	5.74542	PARK7
Diseases of Carbohydrate Metabolism	1/34	0.231282	0.625724	3.92414	5.74542	NAGLU
Impaired BRCA2 Binding to RAD51	1/35	0.237211	0.625724	3.80854	5.47974	ATRIP
Inwardly Rectifying K+ Channels	1/35	0.237211	0.625724	3.80854	5.47974	ABCC9
Transcriptional Regulation by NPAS4	1/35	0.237211	0.625724	3.80854	5.47974	KCNIP3
Translation of Structural Proteins 9683701	1/35	0.237211	0.625724	3.80854	5.47974	ST3GAL3
G Alpha (Q) Signalling Events	3/219	0.238371	0.625724	1.80556	2.58904	ABHD12;P2RY6;RGS3
Budding and Maturation of HIV Virion	1/36	0.243094	0.627135	3.69953	5.23227	NEDD4L
Activation of ATR in Response to Replication Stress	1/37	0.248933	0.627135	3.59659	5.00131	ATRIP
HDR Through Single Strand Annealing (SSA)	1/37	0.248933	0.627135	3.59659	5.00131	ATRIP
Fanconi Anemia Pathway	1/38	0.254727	0.627135	3.49921	4.78538	ATRIP
Signaling by FGFR1 in Disease	1/38	0.254727	0.627135	3.49921	4.78538	TRIM24
DNA Damage Recognition in GG-NER	1/38	0.254727	0.627135	3.49921	4.78538	COPS7B
Maturation of Spike Protein 9694548	1/38	0.254727	0.627135	3.49921	4.78538	ST3GAL3
Mitochondrial Fatty Acid Beta-Oxidation	1/38	0.254727	0.627135	3.49921	4.78538	PCCA
Glycerophospholipid Biosynthesis	2/128	0.258893	0.627135	2.05931	2.78283	PLA2G5;CRLS1
Platelet Degranulation	2/128	0.258893	0.627135	2.05931	2.78283	CYB5R1;CLU
Mitophagy	1/39	0.260477	0.627135	3.40695	4.58317	TOMM70
Glycosphingolipid Catabolism	1/39	0.260477	0.627135	3.40695	4.58317	GLB1L
Synthesis of PA	1/39	0.260477	0.627135	3.40695	4.58317	PLA2G5
Presynaptic Phase of Homologous DNA Pairing and Strand Exchange	1/40	0.266182	0.629593	3.31942	4.39351	ATRIP
Sensory Perception of Sweet, Bitter, and Umami (Glutamate) Taste	1/41	0.271844	0.629593	3.23627	4.21534	SCN2A
Signaling by Retinoic Acid	1/41	0.271844	0.629593	3.23627	4.21534	ALDH1A1
Defective Homologous Recombination Repair (HRR) Due to BRCA2 Loss of Function	1/41	0.271844	0.629593	3.23627	4.21534	ATRIP
Diseases Associated With Glycosaminoglycan Metabolism	1/41	0.271844	0.629593	3.23627	4.21534	ST3GAL3
Diseases of DNA Double-Strand Break Repair	1/41	0.271844	0.629593	3.23627	4.21534	ATRIP
Response to Elevated Platelet Cytosolic Ca2+	2/133	0.273157	0.629593	1.98021	2.56974	CYB5R1;CLU
Gene Silencing by RNA	2/134	0.276009	0.632312	1.96511	2.52973	PIWIL2;ANG
Aggrephagy	1/43	0.283037	0.640647	3.08185	3.88985	PARK7
Homologous DNA Pairing and Strand Exchange	1/43	0.283037	0.640647	3.08185	3.88985	ATRIP
SUMOylation of Transcription Cofactors	1/44	0.28857	0.641643	3.01003	3.74092	PARK7
Bile Acid and Bile Salt Metabolism	1/44	0.28857	0.641643	3.01003	3.74092	OSBP
Uptake and Actions of Bacterial Toxins	1/44	0.28857	0.641643	3.01003	3.74092	ANTXR2
Early SARS-CoV-2 Infection Events	1/46	0.299508	0.66207	2.87596	3.4673	ISCU
Macroautophagy	2/143	0.301636	0.6624	1.83884	2.20391	TOMM70;PARK7
Sensory Perception of Taste	1/47	0.304914	0.6624	2.8133	3.34143	SCN2A
TGF-beta Receptor Signaling Activates SMADs	1/47	0.304914	0.6624	2.8133	3.34143	NEDD4L
Complex IV Assembly	1/48	0.310279	0.670202	2.7533	3.22215	TACO1
Transport of Small Molecules	7/724	0.324195	0.676063	1.27044	1.43103	CYB5R1;MBTPS1;ABCB7;SLC2A12;NEDD4L;ABCC9;ATP9B
Formation of TC-NER Pre-Incision Complex	1/51	0.326128	0.676063	2.58771	2.89945	COPS7B
Nonhomologous End-Joining (NHEJ)	1/51	0.326128	0.676063	2.58771	2.89945	DCLRE1C
Transcriptional Activity of SMAD2 SMAD3 SMAD4 Heterotrimer	1/51	0.326128	0.676063	2.58771	2.89945	NEDD4L
Diseases of DNA Repair	1/51	0.326128	0.676063	2.58771	2.89945	ATRIP
DNA Double-Strand Break Repair	2/152	0.327112	0.676063	1.72772	1.93065	DCLRE1C;ATRIP
Platelet Activation, Signaling and Aggregation	3/262	0.328063	0.676063	1.50249	1.6746	ABHD12;CYB5R1;CLU
CDC42 GTPase Cycle	2/155	0.335553	0.676063	1.69358	1.84935	KCTD3;ARHGAP24
Metabolism of Steroids	2/155	0.335553	0.676063	1.69358	1.84935	MBTPS1;OSBP
RHOD GTPase Cycle	1/53	0.336492	0.676063	2.48793	2.70981	STBD1
SARS-CoV Infections	5/498	0.33832	0.676063	1.3173	1.42764	TOMM70;FNTA;SIGMAR1;ISCU;ST3GAL3
SARS-CoV-1 Infection	2/157	0.341163	0.676063	1.67156	1.79759	TOMM70;ST3GAL3
Cell-Cell Communication	2/157	0.341163	0.676063	1.67156	1.79759	SIRPG;ANG
SARS-CoV-1 Activates Modulates Innate Immune Responses	1/54	0.341614	0.676063	2.44087	2.62167	TOMM70
Ion Homeostasis	1/54	0.341614	0.676063	2.44087	2.62167	ABCC9
Respiratory Electron Transport	2/158	0.343963	0.676063	1.66076	1.7724	TACO1;ISCU
Autophagy	2/158	0.343963	0.676063	1.66076	1.7724	TOMM70;PARK7
Ion Transport by P-type ATPases	1/55	0.346698	0.676063	2.39555	2.53761	ATP9B
Golgi Associated Vesicle Biogenesis	1/56	0.351742	0.676063	2.35187	2.45737	PUM1
Transcriptional Activation of Mitochondrial Biogenesis	1/56	0.351742	0.676063	2.35187	2.45737	ACSS2
Regulation of Cholesterol Biosynthesis by SREBP (SREBF)	1/56	0.351742	0.676063	2.35187	2.45737	MBTPS1
Signaling by TGFB Family Members	2/161	0.35234	0.676063	1.62918	1.69949	ACVR1C;NEDD4L
Potential Therapeutics for SARS	2/164	0.360679	0.687076	1.59877	1.63037	FNTA;SIGMAR1
mRNA 3'-End Processing	1/58	0.361715	0.687076	2.26912	2.30747	THOC5
Adherens Junctions Interactions	1/59	0.366644	0.689509	2.22989	2.23739	ANG
Arachidonate Metabolism	1/59	0.366644	0.689509	2.22989	2.23739	CBR1
Formation of the Beta-Catenin TCF Transactivating Complex	1/60	0.371535	0.695249	2.19198	2.17031	TRRAP
Signaling by WNT	3/287	0.380546	0.708408	1.36848	1.32216	TRRAP;RSPO3;WLS
Signaling by FGFR in Disease	1/63	0.385985	0.708408	2.0856	1.9854	TRIM24
Translation of Structural Proteins 9694635	1/63	0.385985	0.708408	2.0856	1.9854	ST3GAL3
Synthesis of Substrates in N-glycan Biosythesis	1/64	0.390728	0.708408	2.05239	1.92872	ST3GAL3
Cytosolic Sensors of Pathogen-Associated DNA	1/64	0.390728	0.708408	2.05239	1.92872	TREX1
Fatty Acid Metabolism	2/176	0.393621	0.708408	1.4876	1.38699	CBR1;PCCA
ABC Transporter Disorders	1/65	0.395434	0.708408	2.02022	1.8743	ABCC9
O-linked Glycosylation of Mucins	1/65	0.395434	0.708408	2.02022	1.8743	ST3GAL3
Signaling by BRAF and RAF1 Fusions	1/65	0.395434	0.708408	2.02022	1.8743	TRIM24
RNA Polymerase II Transcription Termination	1/67	0.404739	0.721657	1.9588	1.77176	THOC5
HDR Through Homologous Recombination (HRR)	1/69	0.413901	0.729905	1.901	1.67692	ATRIP
RAC1 GTPase Cycle	2/184	0.415157	0.729905	1.42163	1.24975	FAM13A;ARHGAP24
Ion Channel Transport	2/184	0.415157	0.729905	1.42163	1.24975	NEDD4L;ATP9B
trans-Golgi Network Vesicle Budding	1/72	0.427383	0.742718	1.8204	1.54747	PUM1
TCF Dependent Signaling in Response to WNT	2/189	0.428425	0.742718	1.38327	1.17251	TRRAP;RSPO3
Ub-specific Processing Proteases	2/190	0.43106	0.742718	1.37584	1.15778	TOMM70;TRRAP
DNA Repair	3/312	0.432135	0.742718	1.25616	1.05394	DCLRE1C;COPS7B;ATRIP
SARS-CoV-2 Infection	3/313	0.43417	0.742718	1.25204	1.0446	TOMM70;ISCU;ST3GAL3
RHOG GTPase Cycle	1/74	0.436199	0.742718	1.77035	1.46878	STBD1
Transport of Mature mRNA Derived From an Intron-Containing Transcript	1/74	0.436199	0.742718	1.77035	1.46878	THOC5
Plasma Lipoprotein Assembly, Remodeling, and Clearance	1/75	0.440557	0.746773	1.74633	1.4315	MBTPS1
Transcription-Coupled Nucleotide Excision Repair (TC-NER)	1/76	0.444881	0.750736	1.72296	1.39551	COPS7B
G2 M DNA Damage Checkpoint	1/77	0.449171	0.754608	1.70021	1.36076	ATRIP
RHO GTPase Cycle	4/450	0.457315	0.75479	1.15994	0.907517	STBD1;FAM13A;KCTD3;ARHGAP24
Biosynthesis of the N-glycan Precursor (Dolichol LLO) and Transfer to a Nascent Protein	1/79	0.457654	0.75479	1.65644	1.29475	ST3GAL3
Processing of DNA Double-Strand Break Ends	1/80	0.461847	0.75479	1.63539	1.26338	ATRIP
Late SARS-CoV-2 Infection Events	1/80	0.461847	0.75479	1.63539	1.26338	ST3GAL3
Mitotic Prometaphase	2/203	0.464711	0.75479	1.286	0.985517	NSL1;MZT1
Centrosome Maturation	1/81	0.466007	0.75479	1.61487	1.23304	MZT1
RNA Polymerase II Transcribes snRNA Genes	1/81	0.466007	0.75479	1.61487	1.23304	ICE2
Recruitment of Mitotic Centrosome Proteins and Complexes	1/81	0.466007	0.75479	1.61487	1.23304	MZT1
mRNA Splicing - Major Pathway	2/204	0.467251	0.75479	1.27957	0.973612	DDX42;BUD13
Oncogenic MAPK Signaling	1/82	0.470136	0.756218	1.59485	1.20369	TRIM24
Transport of Mature Transcript to Cytoplasm	1/83	0.474232	0.756371	1.57532	1.17528	THOC5
Regulation of HSF1-mediated Heat Shock Response	1/83	0.474232	0.756371	1.57532	1.17528	ST13
Global Genome Nucleotide Excision Repair (GG-NER)	1/84	0.478298	0.756471	1.55626	1.14778	COPS7B
Transcriptional Regulation of White Adipocyte Differentiation	1/84	0.478298	0.756471	1.55626	1.14778	MED7
Integrin Cell Surface Interactions	1/85	0.482332	0.759647	1.53766	1.12114	ITGAD
Phospholipid Metabolism	2/211	0.484834	0.759647	1.23628	0.895	PLA2G5;CRLS1
DDX58 IFIH1-mediated Induction of Interferon-Alpha Beta	1/86	0.486335	0.759647	1.51949	1.09534	TOMM70
RAC2 GTPase Cycle	1/88	0.494249	0.768831	1.48441	1.04609	STBD1
Pre-NOTCH Expression and Processing	1/89	0.49816	0.77174	1.46747	1.02258	ST3GAL3
RAB GEFs Exchange GTP for GDP on RABs	1/90	0.502042	0.772315	1.45091	0.999779	DENND2D
Cell-cell Junction Organization	1/92	0.509715	0.772315	1.41888	0.956184	ANG
Regulation of TP53 Activity Through Phosphorylation	1/92	0.509715	0.772315	1.41888	0.956184	ATRIP
Biological Oxidations	2/222	0.511732	0.772315	1.1738	0.786394	ACSS2;ALDH1A1
Amplification of Signal From Unattached Kinetochores via a MAD2 Inhibitory Signal	1/94	0.517271	0.772315	1.38822	0.915098	NSL1
Amplification of Signal From the Kinetochores	1/94	0.517271	0.772315	1.38822	0.915098	NSL1
Signaling by TGF-beta Receptor Complex	1/94	0.517271	0.772315	1.38822	0.915098	NEDD4L
RAC3 GTPase Cycle	1/94	0.517271	0.772315	1.38822	0.915098	STBD1
Recruitment of NuMA to Mitotic Centrosomes	1/94	0.517271	0.772315	1.38822	0.915098	MZT1
Antimicrobial Peptides	1/95	0.521006	0.772315	1.37338	0.895437	CLU
Unfolded Protein Response (UPR)	1/95	0.521006	0.772315	1.37338	0.895437	MBTPS1
Interferon Gamma Signaling	1/99	0.535659	0.775559	1.31706	0.822184	TRIM14
Visual Phototransduction	1/99	0.535659	0.775559	1.31706	0.822184	FNTA
Cell Surface Interactions at the Vascular Wall	2/233	0.5377	0.775559	1.11728	0.693222	SIRPG;CD99
Neddylation	2/234	0.540014	0.775559	1.11241	0.685422	SPSB2;COPS7B
COPI-dependent Golgi-to-ER Retrograde Traffic	1/101	0.542818	0.775559	1.29059	0.788525	TMED7
COPI-mediated Anterograde Transport	1/101	0.542818	0.775559	1.29059	0.788525	TMED7
Cellular Response to Heat Stress	1/101	0.542818	0.775559	1.29059	0.788525	ST13
Chromatin Modifying Enzymes	2/238	0.549189	0.775559	1.09333	0.655248	TRRAP;JADE1
Chromatin Organization	2/238	0.549189	0.775559	1.09333	0.655248	TRRAP;JADE1
Epigenetic Regulation of Adipogenesis Genes by MLL3 and MLL4 Complexes	1/103	0.549867	0.775559	1.26515	0.756662	MED7
Epigenetic Regulation of Gene Expression by MLL3 and MLL4 Complexes	1/103	0.549867	0.775559	1.26515	0.756662	MED7
Potassium Channels	1/103	0.549867	0.775559	1.26515	0.756662	ABCC9
MLL4 and MLL3 Complexes Regulate Expression of PPARG Targets in Adipogenesis and Hepatic Steatosis	1/103	0.549867	0.775559	1.26515	0.756662	MED7
Cargo Recognition for Clathrin-Mediated Endocytosis	1/105	0.556808	0.78243	1.2407	0.726472	COPS7B
Stimuli-sensing Channels	1/107	0.563643	0.786189	1.21717	0.697843	NEDD4L
Post-translational Protein Phosphorylation	1/107	0.563643	0.786189	1.21717	0.697843	MBTPS1
Nucleotide Excision Repair	1/108	0.567021	0.787993	1.20573	0.684081	COPS7B
RSV-host Interactions	1/109	0.570373	0.788576	1.1945	0.670672	MED7
Post-translational Protein Modification	11/1457	0.571923	0.788576	0.978828	0.54692	TOMM70;MBTPS1;SPSB2;TRRAP;PIGP;COPS7B;PARK7;LIAS;TMED7;ST3GAL3;OPCML
Adipogenesis	1/110	0.573699	0.788576	1.18349	0.657604	MED7
Mitotic Spindle Checkpoint	1/111	0.577	0.790239	1.17267	0.644865	NSL1
SARS-CoV-1-host Interactions	1/112	0.580275	0.790305	1.16204	0.632446	TOMM70
O-linked Glycosylation	1/114	0.58675	0.790305	1.14136	0.608523	ST3GAL3
HDR Through Homologous Recombination (HRR) or Single Strand Annealing (SSA)	1/116	0.593126	0.790305	1.1214	0.58576	ATRIP
EML4 and NUDC in Mitotic Spindle Formation	1/116	0.593126	0.790305	1.1214	0.58576	NSL1
Signaling by Rho GTPases	5/672	0.593712	0.790305	0.964903	0.503062	STBD1;FAM13A;KCTD3;ARHGAP24;NSL1
PPARA Activates Gene Expression	1/117	0.596278	0.790305	1.11167	0.57479	MED7
Cell Cycle Checkpoints	2/261	0.599443	0.790305	0.995072	0.509233	ATRIP;NSL1
SRP-dependent Cotranslational Protein Targeting to Membrane	1/119	0.602507	0.790305	1.09272	0.553633	SRP68
Cell Junction Organization	1/119	0.602507	0.790305	1.09272	0.553633	ANG
Regulation of Lipid Metabolism by PPARalpha	1/119	0.602507	0.790305	1.09272	0.553633	MED7
Nonsense Mediated Decay (NMD) Enhanced by the Exon Junction Complex (EJC)	1/120	0.605586	0.790305	1.08348	0.54343	SMG8
Nonsense-Mediated Decay (NMD)	1/120	0.605586	0.790305	1.08348	0.54343	SMG8
L1CAM Interactions	1/120	0.605586	0.790305	1.08348	0.54343	SCN2A
Selenoamino Acid Metabolism	1/122	0.611673	0.790305	1.06547	0.523738	HNMT
Homology Directed Repair	1/122	0.611673	0.790305	1.06547	0.523738	ATRIP
Deubiquitination	2/268	0.613885	0.790305	0.96854	0.472597	TOMM70;TRRAP
Signaling by Rho GTPases, Miro GTPases and RHOBTB3	5/688	0.614638	0.790305	0.941513	0.458256	STBD1;FAM13A;KCTD3;ARHGAP24;NSL1
Rab Regulation of Trafficking	1/123	0.614682	0.790305	1.05668	0.514234	DENND2D
Regulation of IGF Transport and Uptake by Insulin-like Growth Factor Binding Proteins (IGFBPs)	1/124	0.617667	0.791452	1.04804	0.50495	MBTPS1
Resolution of Sister Chromatid Cohesion	1/126	0.623569	0.793633	1.03116	0.487014	NSL1
MHC Class II Antigen Presentation	1/126	0.623569	0.793633	1.03116	0.487014	CTSF
Regulation of Complement Cascade	1/128	0.62938	0.798342	1.01482	0.469882	CLU
Formation of the Cornified Envelope	1/129	0.632253	0.799303	1.00684	0.461603	DSC2
Hemostasis	5/707	0.638665	0.804718	0.915123	0.410319	ABHD12;CYB5R1;SIRPG;CLU;CD99
Respiratory Syncytial Virus Infection Pathway	1/133	0.643522	0.808143	0.976134	0.430279	MED7
Epigenetic Regulation by WDR5-containing Histone Modifying Complexes	1/135	0.649027	0.809677	0.961467	0.415624	MED7
Golgi-to-ER Retrograde Transport	1/135	0.649027	0.809677	0.961467	0.415624	TMED7
G2 M Checkpoints	1/137	0.654448	0.812374	0.947232	0.401592	ATRIP
SARS-CoV-2 Activates Modulates Innate and Adaptive Immune Responses	1/138	0.657127	0.812374	0.94027	0.394799	TOMM70
Complement Cascade	1/139	0.659785	0.812374	0.933409	0.38815	CLU
RHO GTPases Activate Formins	1/139	0.659785	0.812374	0.933409	0.38815	NSL1
Interleukin-1 Family Signaling	1/140	0.662423	0.812974	0.926647	0.38164	IL18BP
Antigen Processing Ubiquitination & Proteasome Degradation	2/296	0.667691	0.814603	0.875045	0.353457	SPSB2;NEDD4L
Organelle Biogenesis and Maintenance	2/297	0.669497	0.814603	0.872034	0.349885	CHCHD3;ACSS2
Bacterial Infection Pathways	1/143	0.670216	0.814603	0.906932	0.362914	ANTXR2
Clathrin-mediated Endocytosis	1/145	0.675311	0.815552	0.894245	0.351064	COPS7B
Late Phase of HIV Life Cycle	1/145	0.675311	0.815552	0.894245	0.351064	NEDD4L
Diseases of Glycosylation	1/146	0.67783	0.815986	0.888032	0.34532	ST3GAL3
Viral Infection Pathways	7/1029	0.684424	0.819873	0.877085	0.332572	TOMM70;FNTA;SIGMAR1;NEDD4L;ISCU;MED7;ST3GAL3
Asparagine N-linked Glycosylation	2/306	0.685396	0.819873	0.845828	0.319518	TMED7;ST3GAL3
ER to Golgi Anterograde Transport	1/155	0.699639	0.834192	0.835752	0.298523	TMED7
Metabolism of RNA	5/761	0.70178	0.834192	0.84736	0.30008	DDX42;BUD13;SNRNP35;THOC5;SMG8
HIV Life Cycle	1/158	0.706578	0.837261	0.819658	0.284685	NEDD4L
Regulation of TP53 Activity	1/160	0.711115	0.840004	0.809265	0.275896	ATRIP
Neutrophil Degranulation	3/478	0.715838	0.842949	0.81022	0.270858	PYGB;STBD1;ORMDL3
Disorders of Transmembrane Transporters	1/164	0.719981	0.845195	0.789246	0.259291	ABCC9
Membrane Trafficking	4/633	0.722356	0.845358	0.814711	0.264974	DENND2D;COPS7B;PUM1;TMED7
SUMO E3 Ligases SUMOylate Target Proteins	1/170	0.732776	0.854905	0.760993	0.236605	PARK7
SUMOylation	1/176	0.74499	0.866119	0.734678	0.216278	PARK7
Separation of Sister Chromatids	1/177	0.746971	0.866119	0.730466	0.213099	NSL1
G2 M Transition	1/184	0.760416	0.876707	0.702275	0.192346	MZT1
Mitotic G2-G2 M Phases	1/186	0.764125	0.876707	0.694612	0.186867	MZT1
Transport to the Golgi and Subsequent Modification	1/186	0.764125	0.876707	0.694612	0.186867	TMED7
Metabolism of Amino Acids and Derivatives	2/358	0.765379	0.876707	0.720358	0.192612	HNMT;ACAT1
Disease	14/2131	0.772883	0.882628	0.837459	0.215753	TOMM70;SIGMAR1;NEDD4L;ABCC9;ANTXR2;MED7;ACAT1;FNTA;NAGLU;PCCA;TRIM24;ATRIP;ISCU;ST3GAL3
M Phase	2/372	0.78368	0.891012	0.692603	0.168825	NSL1;MZT1
Class I MHC Mediated Antigen Processing & Presentation	2/373	0.784939	0.891012	0.690701	0.167253	SPSB2;NEDD4L
Transcriptional Regulation by RUNX1	1/202	0.791818	0.89613	0.638799	0.149111	RSPO3
Intra-Golgi and Retrograde Golgi-to-ER Traffic	1/204	0.795044	0.897095	0.632441	0.145055	TMED7
Infectious Disease	8/1311	0.798372	0.898168	0.779781	0.175592	TOMM70;FNTA;SIGMAR1;NEDD4L;ANTXR2;ISCU;MED7;ST3GAL3
Signaling by NOTCH	1/209	0.802894	0.900576	0.617081	0.135469	ST3GAL3
Gene Expression (Transcription)	10/1615	0.805828	0.901192	0.789244	0.170386	PIWIL2;ICE2;KCNIP3;NEDD4L;RSPO3;ANG;ZNF446;THOC5;ATRIP;MED7
Keratinization	1/217	0.814837	0.907332	0.593985	0.121628	DSC2
SARS-CoV-2-host Interactions	1/218	0.816278	0.907332	0.591217	0.120017	TOMM70
Mitotic Anaphase	1/221	0.820536	0.907332	0.583066	0.115329	NSL1
Mitotic Metaphase and Anaphase	1/222	0.821933	0.907332	0.580398	0.113814	NSL1
Immunoregulatory Interactions Between a Lymphoid and a non-Lymphoid Cell	1/223	0.82332	0.907332	0.577754	0.112321	CD99
HIV Infection	1/227	0.828759	0.909138	0.567413	0.106575	NEDD4L
RNA Polymerase II Transcription	8/1360	0.829768	0.909138	0.749534	0.13987	ICE2;KCNIP3;NEDD4L;RSPO3;ZNF446;THOC5;ATRIP;MED7
Vesicle-mediated Transport	4/752	0.835398	0.91266	0.680856	0.12245	DENND2D;COPS7B;PUM1;TMED7
SLC-mediated Transmembrane Transport	1/249	0.855834	0.930496	0.516498	0.0804077	SLC2A12
Immune System	13/2150	0.856647	0.930496	0.764036	0.118219	TOMM70;PYGB;TREX1;NEDD4L;THOC5;CLU;IL18BP;SPSB2;STBD1;ORMDL3;TRIM14;CTSF;CD99
Signal Transduction	16/2613	0.86818	0.939048	0.770075	0.108855	TRRAP;FAM13A;NEDD4L;KCTD3;ARHGAP24;NSL1;ABHD12;P2RY6;RGS3;ACVR1C;FNTA;STBD1;ALDH1A1;RSPO3;WLS;ST3GAL3
GPCR Downstream Signalling	3/633	0.869489	0.939048	0.605992	0.0847476	ABHD12;P2RY6;RGS3
RAF MAP Kinase Cascade	1/265	0.872811	0.939888	0.484799	0.0659504	FNTA
Signaling by Nuclear Receptors	1/270	0.877697	0.939888	0.475666	0.0620526	ALDH1A1
MAPK1 MAPK3 Signaling	1/271	0.878651	0.939888	0.47388	0.0613045	FNTA
Cell Cycle	3/649	0.880213	0.939888	0.590491	0.0753417	ATRIP;NSL1;MZT1
Innate Immune System	6/1149	0.882946	0.940151	0.663368	0.0825832	TOMM70;PYGB;TREX1;STBD1;ORMDL3;CLU
Interferon Signaling	1/280	0.886917	0.941726	0.458383	0.055008	TRIM14
Epigenetic Regulation of Gene Expression	1/291	0.896262	0.946333	0.440748	0.0482717	MED7
RHO GTPase Effectors	1/291	0.896262	0.946333	0.440748	0.0482717	NSL1
Adaptive Immune System	4/854	0.899235	0.946827	0.595953	0.0632967	SPSB2;NEDD4L;CTSF;CD99
Extracellular Matrix Organization	1/300	0.903335	0.948502	0.427285	0.0434386	ITGAD
Cell Cycle, Mitotic	2/516	0.910156	0.949928	0.49488	0.0465878	NSL1;MZT1
Signaling by GPCR	3/706	0.912354	0.949928	0.541002	0.0496245	ABHD12;P2RY6;RGS3
MAPK Family Signaling Cascades	1/314	0.913396	0.949928	0.407881	0.0369482	FNTA
G Alpha (I) Signalling Events	1/316	0.914746	0.949928	0.40525	0.0361115	RGS3
Generic Transcription Pathway	6/1230	0.917667	0.950351	0.616786	0.0529947	KCNIP3;NEDD4L;RSPO3;ZNF446;ATRIP;MED7
Class A 1 (Rhodopsin-like Receptors)	1/333	0.925406	0.955747	0.384164	0.0297816	P2RY6
Transcriptional Regulation by TP53	1/362	0.940621	0.96666	0.352778	0.0215952	ATRIP
Cytokine Signaling in Immune System	3/776	0.941087	0.96666	0.490212	0.0297654	TRIM14;THOC5;IL18BP
Neuronal System	1/411	0.959645	0.980584	0.309836	0.0127626	ABCC9
Sensory Perception	2/640	0.959831	0.980584	0.396139	0.016241	FNTA;SCN2A
Diseases of Signal Transduction by Growth Factor Receptors and Second Messengers	1/451	0.970579	0.986469	0.281714	0.00841267	TRIM24
Signaling by Interleukins	1/452	0.970811	0.986469	0.281075	0.00832647	IL18BP
GPCR Ligand Binding	1/467	0.974077	0.987134	0.271817	0.00713923	P2RY6
Cellular Responses to Stress	2/787	0.985162	0.993468	0.319494	0.00477627	MBTPS1;ST13
Axon Guidance	1/541	0.985584	0.993468	0.233672	0.00339323	SCN2A
Nervous System Development	1/567	0.988275	0.993532	0.222638	0.00262576	SCN2A
Cellular Responses to Stimuli	2/887	0.992616	0.994985	0.281906	0.00208939	MBTPS1;ST13
Developmental Biology	4/1385	0.994985	0.994985	0.356553	0.00179252	ACVR1C;SCN2A;DSC2;MED7
