# Supplementary material for: Transcriptome of Subcutaneous Adipose Tissue reflect Membrane Dysfunction and Impaired Oxidative Processes in T2D across Heterogenous Populations
Source: Research Square preprint supplement (doi:10.21203/rs.3.rs-7053974/v1), 2025-11-14
Supplement: Supplementary file 9 [file d1e41a03a64fc7ce9a1a40ce.xlsx]

## Sheet: Gene names and Protein names
Gene symbols	Association ID in cohort 1 and 2	Association ID in cohort 3	Ensemble ID	Protein names
ACSS1	ILMN_1752269	11755873_a_at	ENSG00000154930	acyl-CoA synthetase short chain family member 1
ADAM23	ILMN_2060086	11736770_a_at	ENSG00000114948	ADAM metallopeptidase domain 23
ADAMTSL2	ILMN_1721495	11730124_s_at	ENSG00000197859	ADAMTS like 2
ADAMTSL2	ILMN_1721495	11730125_x_at	ENSG00000197859	ADAMTS like 2
ADCY1	ILMN_2120555	11722266_at	ENSG00000164742	adenylate cyclase 1
ADGRF1	ILMN_2241124	11731538_a_at	ENSG00000153292	adhesion G protein-coupled receptor F1
AMPD3	ILMN_1731223	11734064_a_at	ENSG00000133805	adenosine monophosphate deaminase 3
AMPD3	ILMN_1731223	11739419_a_at	ENSG00000133805	adenosine monophosphate deaminase 3
AMPD3	ILMN_1731223	11741184_a_at	ENSG00000133805	adenosine monophosphate deaminase 3
AMPD3	ILMN_1731223	11758009_s_at	ENSG00000133805	adenosine monophosphate deaminase 3
ATP6V1G2-DDX39B	ILMN_1686626	11715528_a_at	ENSG00000254870	ATP6V1G2-DDX39B readthrough (NMD candidate)
ATP6V1G2-DDX39B	ILMN_1686626	11715529_x_at	ENSG00000254870	ATP6V1G2-DDX39B readthrough (NMD candidate)
BRD4	ILMN_1736981	11754395_a_at	ENSG00000141867	bromodomain containing 4
BTN2A1	ILMN_1783392	11747874_x_at	ENSG00000112763	butyrophilin subfamily 2 member A1
CAMK1D	ILMN_1795561	11740661_at	ENSG00000183049	calcium/calmodulin dependent protein kinase ID
CD40	ILMN_2367818	11731818_a_at	ENSG00000101017	CD40 molecule
CD47	ILMN_1771333	11735329_a_at	ENSG00000196776	CD47 molecule
CNTRL	ILMN_1758778	11723378_a_at	ENSG00000119397	centriolin
CNTRL	ILMN_1758778	11747135_x_at	ENSG00000119397	centriolin
COL4A6	ILMN_1675857	11750015_a_at	ENSG00000197565	collagen type IV alpha 6 chain
COPS7A	ILMN_1758412	11744338_a_at	ENSG00000111652	COP9 signalosome subunit 7A
CYB561	ILMN_1771179	11754284_s_at	ENSG00000008283	cytochrome b561
CYB561	ILMN_2378376	11754284_s_at	ENSG00000008283	cytochrome b561
DDX39B	ILMN_1686626	11715528_a_at	ENSG00000198563	DExD-box helicase 39B
DDX39B	ILMN_1686626	11715529_x_at	ENSG00000198563	DExD-box helicase 39B
ETV5	ILMN_1739222	11720352_at	ENSG00000244405	ETS variant transcription factor 5
FNBP1	ILMN_1797342	11727111_a_at	ENSG00000187239	formin binding protein 1
FXYD2	ILMN_2289593	11729732_x_at	ENSG00000137731	FXYD domain containing ion transport regulator 2
FXYD2	ILMN_2289593	11753881_x_at	ENSG00000137731	FXYD domain containing ion transport regulator 2
GRIA4	ILMN_2322100	11730475_a_at	ENSG00000152578	glutamate ionotropic receptor AMPA type subunit 4
KIF5C	ILMN_2212999	11746261_s_at	ENSG00000168280	kinesin family member 5C
KIF5C	ILMN_2212999	11754324_s_at	ENSG00000168280	kinesin family member 5C
KLF13	ILMN_1679929	11718160_at	ENSG00000169926	KLF transcription factor 13
KMT2A	ILMN_1668683	11739290_a_at	ENSG00000118058	lysine methyltransferase 2A
KMT2E	ILMN_1783606	11726357_a_at	ENSG00000005483	lysine methyltransferase 2E (inactive)
MARCHF4	ILMN_1789991	11726193_at	ENSG00000144583	membrane associated ring-CH-type finger 4
MBD1	ILMN_1683595	11759747_a_at	ENSG00000141644	methyl-CpG binding domain protein 1
METTL16	ILMN_1790896	11755254_a_at	ENSG00000127804	methyltransferase 16, N6-methyladenosine
MICAL2	ILMN_1785141	11737413_at	ENSG00000133816	microtubule associated monooxygenase, calponin and LIM domain containing 2
MYO18A	ILMN_2330806	11718304_s_at	ENSG00000196535	myosin XVIIIA
NECAP2	ILMN_1749011	11756228_s_at	ENSG00000157191	NECAP endocytosis associated 2
NECAP2	ILMN_1749011	11757839_s_at	ENSG00000157191	NECAP endocytosis associated 2
NUP62	ILMN_1738681	11736409_a_at	ENSG00000213024	nucleoporin 62
PLA2R1	ILMN_1683016	11740417_a_at	ENSG00000153246	phospholipase A2 receptor 1
PRPF3	ILMN_1715392	11747443_a_at	ENSG00000117360	pre-mRNA processing factor 3
PSME1	ILMN_1806017	11726580_x_at	ENSG00000092010	proteasome activator subunit 1
PTGFR	ILMN_1813341	11734179_a_at	ENSG00000122420	prostaglandin F receptor
PTGFR	ILMN_2395652	11734179_a_at	ENSG00000122420	prostaglandin F receptor
PTPRD	ILMN_2315789	11736890_a_at	ENSG00000153707	protein tyrosine phosphatase receptor type D
RFX5	ILMN_1741200	11725092_s_at	ENSG00000143390	regulatory factor X5
SCRN1	ILMN_1756439	11730781_a_at	ENSG00000136193	secernin 1
SCRN1	ILMN_1756439	11736772_s_at	ENSG00000136193	secernin 1
SECISBP2	ILMN_1736481	11717603_a_at	ENSG00000187742	SECIS binding protein 2
SETBP1	ILMN_1720513	11756106_a_at	ENSG00000152217	SET binding protein 1
SMARCC2	ILMN_1791770	11719086_a_at	ENSG00000139613	SWI/SNF related, matrix associated, actin dependent regulator of chromatin subfamily c member 2
SORBS3	ILMN_1789338	11734781_a_at	ENSG00000120896	sorbin and SH3 domain containing 3
TAPBP	ILMN_1742450	11756617_a_at	ENSG00000231925	TAP binding protein
TBCD	ILMN_1795400	11730262_a_at	ENSG00000141556	tubulin folding cofactor D
TLR7	ILMN_1677827	11731148_at	ENSG00000196664	toll like receptor 7
TRAPPC2L	ILMN_1747058	11764016_a_at	ENSG00000167515	trafficking protein particle complex subunit 2L
USP20	ILMN_1771642	11720891_a_at	ENSG00000136878	ubiquitin specific peptidase 20
UVSSA	ILMN_2140700	11724140_a_at	ENSG00000163945	UV stimulated scaffold protein A
VPS13D	ILMN_1656840	11717707_s_at	ENSG00000048707	vacuolar protein sorting 13 homolog D
YTHDC1	ILMN_1670878	11717002_a_at	ENSG00000083896	YTH N6-methyladenosine RNA binding protein C1
ZNF337	ILMN_1663160	11747302_s_at	ENSG00000130684	zinc finger protein 337
ZNF419	ILMN_1680693	11740122_a_at	ENSG00000105136	zinc finger protein 419

## Sheet: Unique Genes
ACSS1
ADAM23
ADAMTSL2
ADCY1
ADGRF1
AMPD3
ATP6V1G2-DDX39B
BRD4
BTN2A1
CAMK1D
CD40
CD47
CNTRL
COL4A6
COPS7A
CYB561
DDX39B
ETV5
FNBP1
FXYD2
GRIA4
KIF5C
KLF13
KMT2A
KMT2E
MARCHF4
MBD1
METTL16
MICAL2
MYO18A
NECAP2
NUP62
PLA2R1
PRPF3
PSME1
PTGFR
PTPRD
RFX5
SCRN1
SECISBP2
SETBP1
SMARCC2
SORBS3
TAPBP
TBCD
TLR7
TRAPPC2L
USP20
UVSSA
VPS13D
YTHDC1
ZNF337
ZNF419

## Sheet: Reactome
Term	Overlap	P-value	Adjusted p-value	Odds Ratio	Combined Score	Genes
Signaling By Cytosolic FGFR1 Fusion Mutants R-HSA-1839117	2/17	0.000913478	0.197769	52.1098	364.678	CNTRL;MYO18A
Synaptic Adhesion-Like Molecules R-HSA-8849932	2/21	0.00140098	0.197769	41.1311	270.255	PTPRD;GRIA4
Transcriptional Regulation By RUNX1 R-HSA-8878171	4/204	0.00208246	0.197769	8.06	49.7641	KMT2E;SMARCC2;KMT2A;PSME1
Potential Therapeutics For SARS R-HSA-9679191	3/97	0.00217328	0.197769	12.6721	77.6994	FXYD2;TLR7;BRD4
FGFR1 Mutant Receptor Activation R-HSA-1839124	2/30	0.00285812	0.208071	27.8978	163.414	CNTRL;MYO18A
Signaling By FGFR1 In Disease R-HSA-5655302	2/36	0.00409753	0.248583	22.9677	126.262	CNTRL;MYO18A
Clathrin-mediated Endocytosis R-HSA-8856828	3/142	0.00633411	0.296746	8.55022	43.2795	NECAP2;FNBP1;COPS7A
PKMTs Methylate Histone Lysines R-HSA-3214841	2/47	0.00690137	0.296746	17.3438	86.3033	KMT2E;KMT2A
Formation Of TC-NER Pre-Incision Complex R-HSA-6781823	2/52	0.0083944	0.296746	15.6055	74.5972	UVSSA;COPS7A
Signaling By FGFR In Disease R-HSA-1226099	2/61	0.0114107	0.296746	13.219	59.1314	CNTRL;MYO18A
RUNX1 Regulates Genes Involved In Megakaryocyte Differentiation And Platelet Function R-HSA-8936459	2/66	0.0132627	0.296746	12.1832	52.6656	KMT2E;KMT2A
SARS-CoV Infections R-HSA-9679506	4/369	0.0164134	0.296746	4.37954	17.9984	FXYD2;NUP62;TLR7;BRD4
Activation Of NMDA Receptors And Postsynaptic Events R-HSA-442755	2/74	0.0164774	0.296746	10.8252	44.4456	ADCY1;GRIA4
Transport Of Mature mRNA Derived From An Intron-Containing Transcript R-HSA-159236	2/74	0.0164774	0.296746	10.8252	44.4456	DDX39B;NUP62
Transcription-Coupled Nucleotide Excision Repair (TC-NER) R-HSA-6781827	2/77	0.0177604	0.296746	10.3906	41.8822	UVSSA;COPS7A
Regulation Of HSF1-mediated Heat Shock Response R-HSA-3371453	2/81	0.0195347	0.296746	9.8625	38.8145	NUP62;COL4A6
Transport Of Mature Transcript To Cytoplasm R-HSA-72202	2/83	0.0204488	0.296746	9.61801	37.4125	DDX39B;NUP62
Membrane Trafficking R-HSA-199991	5/599	0.0208663	0.296746	3.39383	13.1328	NECAP2;TRAPPC2L;KIF5C;FNBP1;COPS7A
Protein-protein Interactions At Synapses R-HSA-6794362	2/88	0.0228106	0.296746	9.05654	34.2385	PTPRD;GRIA4
ER-Phagosome Pathway R-HSA-1236974	2/89	0.023296	0.296746	8.95199	33.6548	PSME1;TAPBP
Adenylate Cyclase Activating Pathway R-HSA-170660	1/9	0.0236033	0.296746	47.9303	179.565	ADCY1
TRAF6 Mediated IRF7 Activation In TLR7/8 Or 9 Signaling R-HSA-975110	1/9	0.0236033	0.296746	47.9303	179.565	TLR7
Prostanoid Ligand Receptors R-HSA-391908	1/9	0.0236033	0.296746	47.9303	179.565	PTGFR
Chromatin Modifying Enzymes R-HSA-3247509	3/238	0.0251989	0.296746	5.03285	18.5257	KMT2E;SMARCC2;KMT2A
Processing Of Capped Intron-Containing Pre-mRNA R-HSA-72203	3/242	0.0263027	0.296746	4.94762	17.9998	DDX39B;PRPF3;NUP62
Vesicle-mediated Transport R-HSA-5653656	5/637	0.026358	0.296746	3.18351	11.5752	NECAP2;TRAPPC2L;KIF5C;FNBP1;COPS7A
Hedgehog Off State R-HSA-5610787	2/98	0.0278525	0.296746	8.10907	29.0372	PSME1;ADCY1
RUNX1 Regulates Transcription Of Genes Involved In Differentiation Of HSCs R-HSA-8939236	2/98	0.0278525	0.296746	8.10907	29.0372	KMT2A;PSME1
Cellular Response To Heat Stress R-HSA-3371556	2/99	0.0283793	0.296746	8.02507	28.5861	NUP62;COL4A6
Ethanol Oxidation R-HSA-71384	1/11	0.0287737	0.296746	38.3404	136.043	ACSS1
TNFR2 Non-Canonical NF-kB Pathway R-HSA-5668541	2/100	0.0289101	0.296746	7.94278	28.1457	CD40;PSME1
Antigen processing-Cross Presentation R-HSA-1236975	2/104	0.0310729	0.296746	7.62976	26.4861	PSME1;TAPBP
Cargo Recognition For Clathrin-Mediated Endocytosis R-HSA-8856825	2/104	0.0310729	0.296746	7.62976	26.4861	NECAP2;COPS7A
Butyrophilin (BTN) Family Interactions R-HSA-8851680	1/12	0.0313489	0.296746	34.8531	120.682	BTN2A1
CREB1 Phosphorylation Thru Activation Of Adenylate Cyclase R-HSA-442720	1/12	0.0313489	0.296746	34.8531	120.682	ADCY1
Nucleotide Excision Repair R-HSA-5696398	2/108	0.033298	0.296746	7.34036	24.9738	UVSSA;COPS7A
Adenylate Cyclase Inhibitory Pathway R-HSA-170670	1/13	0.0339173	0.296746	31.9471	108.104	ADCY1
Trafficking And Processing Of Endosomal TLR R-HSA-1679131	1/13	0.0339173	0.296746	31.9471	108.104	TLR7
Purine Salvage R-HSA-74217	1/13	0.0339173	0.296746	31.9471	108.104	AMPD3
Signal Regulatory Protein Family Interactions R-HSA-391160	1/13	0.0339173	0.296746	31.9471	108.104	CD47
Gene Expression (Transcription) R-HSA-74160	8/1449	0.035843	0.296746	2.28311	7.59956	KMT2E;SMARCC2;DDX39B;KMT2A;ZNF419;NUP62;PSME1;ZNF337
LGI-ADAM Interactions R-HSA-5682910	1/14	0.0364791	0.296746	29.4882	97.6358	ADAM23
Disease R-HSA-1643685	9/1736	0.0373479	0.296746	2.15797	7.09429	FXYD2;ADAMTSL2;CNTRL;NUP62;MYO18A;PSME1;TLR7;ADCY1;BRD4
Eicosanoid Ligand-Binding Receptors R-HSA-391903	1/15	0.0390342	0.296746	27.3805	88.8036	PTGFR
Infectious Disease R-HSA-5663205	6/961	0.0407969	0.296746	2.53875	8.12185	FXYD2;NUP62;PSME1;TLR7;ADCY1;BRD4
SARS-CoV-2 Activates/Modulates Innate And Adaptive Immune Responses R-HSA-9705671	2/121	0.0409417	0.296746	6.53419	20.8807	NUP62;TLR7
PKA Activation In Glucagon Signaling R-HSA-164378	1/16	0.0415827	0.296746	25.5538	81.263	ADCY1
Adaptive Immune System R-HSA-1280218	5/733	0.0441234	0.296746	2.74997	8.58202	CD40;KIF5C;BTN2A1;PSME1;TAPBP
PKA Activation R-HSA-163615	1/17	0.0441245	0.296746	23.9555	74.759	ADCY1
TNF Receptor Superfamily (TNFSF) Members Mediating Non-Canonical NF-kB Pathway R-HSA-5676594	1/17	0.0441245	0.296746	23.9555	74.759	CD40
Acyl Chain Remodelling Of PI R-HSA-1482922	1/17	0.0441245	0.296746	23.9555	74.759	PLA2R1
Trafficking Of GluR2-containing AMPA Receptors R-HSA-416993	1/17	0.0441245	0.296746	23.9555	74.759	GRIA4
Host Interactions Of HIV Factors R-HSA-162909	2/130	0.0465833	0.296746	6.072	18.6199	NUP62;PSME1
Acyl Chain Remodelling Of PG R-HSA-1482925	1/18	0.0466598	0.296746	22.5452	69.0983	PLA2R1
Signaling By FLT3 Fusion Proteins R-HSA-9703465	1/18	0.0466598	0.296746	22.5452	69.0983	MYO18A
PKA-mediated Phosphorylation Of CREB R-HSA-111931	1/19	0.0491884	0.296746	21.2917	64.1326	ADCY1
Signaling By Hedgehog R-HSA-5358351	2/135	0.0498343	0.296746	5.84225	17.5212	PSME1;ADCY1
Receptor-type Tyrosine-Protein Phosphatases R-HSA-388844	1/20	0.0517104	0.296746	20.17	59.7456	PTPRD
Unblocking Of NMDA Receptors, Glutamate Binding And Activation R-HSA-438066	1/21	0.0542259	0.296746	19.1606	55.8454	GRIA4
Acyl Chain Remodelling Of PS R-HSA-1482801	1/22	0.0567348	0.296746	18.2473	52.3581	PLA2R1
RNA Polymerase II Transcription R-HSA-73857	7/1312	0.056799	0.296746	2.17381	6.23501	KMT2E;SMARCC2;DDX39B;KMT2A;ZNF419;PSME1;ZNF337
Metabolism Of Proteins R-HSA-392499	9/1890	0.0587349	0.296746	1.96455	5.56895	TRAPPC2L;USP20;KIF5C;MBD1;ADAMTSL2;NUP62;PSME1;TBCD;COPS7A
Nucleotide Salvage R-HSA-8956321	1/23	0.0592372	0.296746	17.417	49.2239	AMPD3
Post-chaperonin Tubulin Folding Pathway R-HSA-389977	1/23	0.0592372	0.296746	17.417	49.2239	TBCD
RHOBTB2 GTPase Cycle R-HSA-9013418	1/23	0.0592372	0.296746	17.417	49.2239	DDX39B
Attenuation Phase R-HSA-3371568	1/26	0.0667054	0.296746	15.3246	41.4909	COL4A6
Immune System R-HSA-168256	9/1943	0.0676566	0.296746	1.90511	5.13104	CD40;KIF5C;BTN2A1;NUP62;PSME1;TLR7;AMPD3;CD47;TAPBP
FLT3 Signaling In Disease R-HSA-9682385	1/27	0.0691818	0.296746	14.7345	39.356	MYO18A
Acyl Chain Remodelling Of PC R-HSA-1482788	1/27	0.0691818	0.296746	14.7345	39.356	PLA2R1
Postmitotic Nuclear Pore Complex (NPC) Reformation R-HSA-9615933	1/27	0.0691818	0.296746	14.7345	39.356	NUP62
Insulin Processing R-HSA-264876	1/27	0.0691818	0.296746	14.7345	39.356	KIF5C
Post-translational Protein Modification R-HSA-597592	7/1383	0.0712633	0.296746	2.05379	5.42484	TRAPPC2L;USP20;MBD1;ADAMTSL2;NUP62;PSME1;COPS7A
Antigen Presentation: Folding, Assembly, Peptide Loading Of Class I MHC R-HSA-983170	1/28	0.0716518	0.296746	14.188	37.3988	TAPBP
SUMO E3 Ligases SUMOylate Target Proteins R-HSA-3108232	2/168	0.0731806	0.296746	4.67305	12.2192	MBD1;NUP62
Acyl Chain Remodelling Of PE R-HSA-1482839	1/29	0.0741154	0.296746	13.6806	35.5988	PLA2R1
HSF1 Activation R-HSA-3371511	1/29	0.0741154	0.296746	13.6806	35.5988	COL4A6
SUMOylation R-HSA-2990846	2/174	0.0777444	0.296746	4.50866	11.5166	MBD1;NUP62
Glutamate Binding, Activation Of AMPA Receptors And Synaptic Plasticity R-HSA-399721	1/31	0.0790233	0.296746	12.7673	32.4036	GRIA4
Disorders Of Transmembrane Transporters R-HSA-5619115	2/176	0.0792855	0.296746	4.45639	11.2956	NUP62;PSME1
M Phase R-HSA-68886	3/380	0.0795682	0.296746	3.11459	7.88346	CNTRL;NUP62;PSME1
Glucagon Signaling In Metabolic Regulation R-HSA-163359	1/32	0.0814677	0.296746	12.3548	30.9804	ADCY1
Defective TPR May Confer Susceptibility Towards Thyroid Papillary Carcinoma (TPC) R-HSA-5619107	1/32	0.0814677	0.296746	12.3548	30.9804	NUP62
Neuronal System R-HSA-112316	3/386	0.0825084	0.296746	3.06486	7.64637	PTPRD;ADCY1;GRIA4
CaM Pathway R-HSA-111997	1/33	0.0839057	0.296746	11.9681	29.6578	ADCY1
G2/M Transition R-HSA-69275	2/182	0.0839661	0.296746	4.30654	10.6688	CNTRL;PSME1
Neurotransmitter Receptors And Postsynaptic Signal Transmission R-HSA-112314	2/182	0.0839661	0.296746	4.30654	10.6688	ADCY1;GRIA4
Mitotic G2-G2/M Phases R-HSA-453274	2/184	0.0855449	0.296746	4.25878	10.4711	CNTRL;PSME1
Nuclear Import Of Rev Protein R-HSA-180746	1/34	0.0863374	0.296746	11.6049	28.4261	NUP62
Transport Of Ribonucleoproteins Into Host Nucleus R-HSA-168271	1/35	0.0887627	0.296746	11.263	27.2766	NUP62
RHOBTB GTPase Cycle R-HSA-9706574	1/35	0.0887627	0.296746	11.263	27.2766	DDX39B
Transport Of SLBP Independent Mature mRNA R-HSA-159227	1/35	0.0887627	0.296746	11.263	27.2766	NUP62
Ca-dependent Events R-HSA-111996	1/35	0.0887627	0.296746	11.263	27.2766	ADCY1
RUNX1 Interacts With Co-Factors Whose Precise Effect On RUNX1 Targets Is Not Known R-HSA-8939243	1/35	0.0887627	0.296746	11.263	27.2766	SMARCC2
Vpr-mediated Nuclear Import Of PICs R-HSA-180910	1/35	0.0887627	0.296746	11.263	27.2766	NUP62
Rev-mediated Nuclear Export Of HIV RNA R-HSA-165054	1/35	0.0887627	0.296746	11.263	27.2766	NUP62
SUMOylation Of SUMOylation Proteins R-HSA-4085377	1/35	0.0887627	0.296746	11.263	27.2766	NUP62
NEP/NS2 Interacts With Cellular Export Machinery R-HSA-168333	1/35	0.0887627	0.296746	11.263	27.2766	NUP62
HSF1-dependent Transactivation R-HSA-3371571	1/36	0.0911817	0.296746	10.9407	26.2018	COL4A6
Transport Of SLBP Dependant Mature mRNA R-HSA-159230	1/36	0.0911817	0.296746	10.9407	26.2018	NUP62
Export Of Viral Ribonucleoproteins From Nucleus R-HSA-168274	1/36	0.0911817	0.296746	10.9407	26.2018	NUP62
Nuclear Pore Complex (NPC) Disassembly R-HSA-3301854	1/36	0.0911817	0.296746	10.9407	26.2018	NUP62
Generic Transcription Pathway R-HSA-212436	6/1190	0.0935542	0.296746	2.02304	4.79301	KMT2E;SMARCC2;KMT2A;ZNF419;PSME1;ZNF337
Interactions Of Rev With Host Cellular Proteins R-HSA-177243	1/37	0.0935944	0.296746	10.6362	25.1949	NUP62
DNA Damage Recognition In GG-NER R-HSA-5696394	1/37	0.0935944	0.296746	10.6362	25.1949	COPS7A
Defective B3GALTL Causes PpS R-HSA-5083635	1/37	0.0935944	0.296746	10.6362	25.1949	ADAMTSL2
SARS-CoV-2-host Interactions R-HSA-9705683	2/196	0.0952042	0.296746	3.99293	9.39029	NUP62;TLR7
Muscle Contraction R-HSA-397014	2/196	0.0952042	0.296746	3.99293	9.39029	FXYD2;SORBS3
O-glycosylation Of TSR Domain-Containing Proteins R-HSA-5173214	1/38	0.0960008	0.296746	10.3482	24.25	ADAMTSL2
Interactions Of Vpr With Host Cellular Proteins R-HSA-176033	1/38	0.0960008	0.296746	10.3482	24.25	NUP62
FCGR3A-mediated IL10 Synthesis R-HSA-9664323	1/38	0.0960008	0.296746	10.3482	24.25	ADCY1
Synthesis Of PA R-HSA-1483166	1/39	0.098401	0.296746	10.0754	23.3619	PLA2R1
DAG And IP3 Signaling R-HSA-1489509	1/39	0.098401	0.296746	10.0754	23.3619	ADCY1
SUMOylation Of Ubiquitinylation Proteins R-HSA-3232142	1/39	0.098401	0.296746	10.0754	23.3619	NUP62
Ub-specific Processing Proteases R-HSA-5689880	2/201	0.0993188	0.296746	3.89161	8.98738	USP20;PSME1
Metabolism Of RNA R-HSA-8953854	4/666	0.0995572	0.296746	2.37808	5.48627	DDX39B;PRPF3;NUP62;PSME1
Diseases Of Signal Transduction By Growth Factor Receptors And Second Messengers R-HSA-5663202	3/424	0.102191	0.296746	2.7828	6.34732	CNTRL;MYO18A;PSME1
Activation Of GABAB Receptors R-HSA-991365	1/42	0.105564	0.296746	9.33677	20.9932	ADCY1
Transport Of Mature mRNA Derived From An Intronless Transcript R-HSA-159231	1/42	0.105564	0.296746	9.33677	20.9932	NUP62
Vasopressin Regulates Renal Water Homeostasis Via Aquaporins R-HSA-432040	1/42	0.105564	0.296746	9.33677	20.9932	ADCY1
Kinesins R-HSA-983189	1/42	0.105564	0.296746	9.33677	20.9932	KIF5C
NS1 Mediated Effects On Host Pathways R-HSA-168276	1/42	0.105564	0.296746	9.33677	20.9932	NUP62
Smooth Muscle Contraction R-HSA-445355	1/43	0.107939	0.296746	9.11401	20.2895	SORBS3
GPER1 Signaling R-HSA-9634597	1/43	0.107939	0.296746	9.11401	20.2895	ADCY1
Transport Of Mature mRNAs Derived From Intronless Transcripts R-HSA-159234	1/43	0.107939	0.296746	9.11401	20.2895	NUP62
RND2 GTPase Cycle R-HSA-9696270	1/43	0.107939	0.296746	9.11401	20.2895	FNBP1
SUMOylation Of Transcription Cofactors R-HSA-3899300	1/43	0.107939	0.296746	9.11401	20.2895	MBD1
Collagen Chain Trimerization R-HSA-8948216	1/44	0.110308	0.296746	8.90161	19.6234	COL4A6
SUMOylation Of DNA Replication Proteins R-HSA-4615885	1/45	0.112671	0.296746	8.69886	18.9921	NUP62
PLC Beta Mediated Events R-HSA-112043	1/47	0.117378	0.296746	8.31982	17.824	ADCY1
G Alpha (Z) Signaling Events R-HSA-418597	1/47	0.117378	0.296746	8.31982	17.824	ADCY1
Viral Messenger RNA Synthesis R-HSA-168325	1/47	0.117378	0.296746	8.31982	17.824	NUP62
SUMOylation Of RNA Binding Proteins R-HSA-4570464	1/47	0.117378	0.296746	8.31982	17.824	NUP62
Cross-presentation Of Soluble Exogenous Antigens (Endosomes) R-HSA-1236978	1/48	0.119723	0.296746	8.14239	17.2828	PSME1
RMTs Methylate Histone Arginines R-HSA-3214858	1/49	0.122061	0.296746	7.97236	16.7677	SMARCC2
Regulation Of Activated PAK-2p34 By Proteasome Mediated Degradation R-HSA-211733	1/49	0.122061	0.296746	7.97236	16.7677	PSME1
HIV Infection R-HSA-162906	2/229	0.123227	0.296746	3.40675	7.13282	NUP62;PSME1
Aquaporin-mediated Transport R-HSA-445717	1/50	0.124393	0.296746	7.80926	16.2769	ADCY1
Ion Homeostasis R-HSA-5578775	1/50	0.124393	0.296746	7.80926	16.2769	FXYD2
Regulation Of Ornithine Decarboxylase (ODC) R-HSA-350562	1/50	0.124393	0.296746	7.80926	16.2769	PSME1
Mitotic Anaphase R-HSA-68882	2/232	0.125867	0.296746	3.36181	6.96744	NUP62;PSME1
GSK3B And BTRC:CUL1-mediated-degradation Of NFE2L2 R-HSA-9762114	1/51	0.12672	0.296746	7.65269	15.8088	PSME1
Autodegradation Of E3 Ubiquitin Ligase COP1 R-HSA-349425	1/51	0.12672	0.296746	7.65269	15.8088	PSME1
Ubiquitin Mediated Degradation Of Phosphorylated Cdc25A R-HSA-69601	1/51	0.12672	0.296746	7.65269	15.8088	PSME1
Ubiquitin-dependent Degradation Of Cyclin D R-HSA-75815	1/51	0.12672	0.296746	7.65269	15.8088	PSME1
Vpu Mediated Degradation Of CD4 R-HSA-180534	1/51	0.12672	0.296746	7.65269	15.8088	PSME1
Mitotic Metaphase And Anaphase R-HSA-2555396	2/233	0.12675	0.296746	3.34708	6.91352	NUP62;PSME1
G-protein Mediated Events R-HSA-112040	1/52	0.12904	0.296746	7.50226	15.3619	ADCY1
Regulation Of Apoptosis R-HSA-169911	1/52	0.12904	0.296746	7.50226	15.3619	PSME1
Metabolism Of Non-Coding RNA R-HSA-194441	1/52	0.12904	0.296746	7.50226	15.3619	NUP62
Neddylation R-HSA-8951664	2/237	0.130298	0.296746	3.28945	6.70366	PSME1;COPS7A
Vif-mediated Degradation Of APOBEC3G R-HSA-180585	1/53	0.131354	0.296746	7.35762	14.9349	PSME1
Ion Transport By P-type ATPases R-HSA-936837	1/53	0.131354	0.296746	7.35762	14.9349	FXYD2
Negative Regulation Of NOTCH4 Signaling R-HSA-9604323	1/53	0.131354	0.296746	7.35762	14.9349	PSME1
Nuclear Envelope Breakdown R-HSA-2980766	1/53	0.131354	0.296746	7.35762	14.9349	NUP62
AUF1 (hnRNP D0) Binds And Destabilizes mRNA R-HSA-450408	1/54	0.133662	0.296746	7.21843	14.5267	PSME1
RHOJ GTPase Cycle R-HSA-9013409	1/54	0.133662	0.296746	7.21843	14.5267	FNBP1
Regulation Of RUNX3 Expression And Activity R-HSA-8941858	1/54	0.133662	0.296746	7.21843	14.5267	PSME1
SCF-beta-TrCP Mediated Degradation Of Emi1 R-HSA-174113	1/54	0.133662	0.296746	7.21843	14.5267	PSME1
Degradation Of AXIN R-HSA-4641257	1/54	0.133662	0.296746	7.21843	14.5267	PSME1
FBXL7 Down-Regulates AURKA During Mitotic Entry And In Early Mitosis R-HSA-8854050	1/54	0.133662	0.296746	7.21843	14.5267	PSME1
Hh Mutants Are Degraded By ERAD R-HSA-5362768	1/55	0.135964	0.296746	7.0844	14.136	PSME1
Degradation Of DVL R-HSA-4641258	1/55	0.135964	0.296746	7.0844	14.136	PSME1
Stabilization Of P53 R-HSA-69541	1/56	0.13826	0.296746	6.95524	13.7618	PSME1
Transmission Across Chemical Synapses R-HSA-112315	2/246	0.138365	0.296746	3.16667	6.26322	ADCY1;GRIA4
tRNA Processing In Nucleus R-HSA-6784531	1/57	0.14055	0.296746	6.8307	13.4032	NUP62
SUMOylation Of Chromatin Organization Proteins R-HSA-4551638	1/57	0.14055	0.296746	6.8307	13.4032	NUP62
Hh Mutants Abrogate Ligand Secretion R-HSA-5387390	1/58	0.142834	0.296746	6.71053	13.0592	PSME1
mRNA 3-End Processing R-HSA-72187	1/58	0.142834	0.296746	6.71053	13.0592	DDX39B
Metabolism Of Polyamines R-HSA-351202	1/58	0.142834	0.296746	6.71053	13.0592	PSME1
NIK To Noncanonical NF-kB Signaling R-HSA-5676590	1/58	0.142834	0.296746	6.71053	13.0592	PSME1
GABA Receptor Activation R-HSA-977443	1/59	0.145112	0.296746	6.5945	12.729	ADCY1
GLI3 Is Processed To GLI3R By Proteasome R-HSA-5610785	1/59	0.145112	0.296746	6.5945	12.729	PSME1
Role Of GTSE1 In G2/M Progression After G2 Checkpoint R-HSA-8852276	1/59	0.145112	0.296746	6.5945	12.729	PSME1
Transcriptional Regulation Of Granulopoiesis R-HSA-9616222	1/59	0.145112	0.296746	6.5945	12.729	KMT2A
RHOQ GTPase Cycle R-HSA-9013406	1/59	0.145112	0.296746	6.5945	12.729	FNBP1
SCF(Skp2)-mediated Degradation Of P27/P21 R-HSA-187577	1/59	0.145112	0.296746	6.5945	12.729	PSME1
Degradation Of GLI1 By Proteasome R-HSA-5610780	1/59	0.145112	0.296746	6.5945	12.729	PSME1
Degradation Of GLI2 By Proteasome R-HSA-5610783	1/59	0.145112	0.296746	6.5945	12.729	PSME1
Defective CFTR Causes Cystic Fibrosis R-HSA-5678895	1/60	0.147384	0.299709	6.4824	12.4119	PSME1
Post NMDA Receptor Activation Events R-HSA-438064	1/61	0.14965	0.299885	6.37404	12.1072	ADCY1
Dectin-1 Mediated Noncanonical NF-kB Signaling R-HSA-5607761	1/61	0.14965	0.299885	6.37404	12.1072	PSME1
Asymmetric Localization Of PCP Proteins R-HSA-4608870	1/62	0.151911	0.299885	6.26923	11.8141	PSME1
Autodegradation Of Cdh1 By Cdh1:APC/C R-HSA-174084	1/63	0.154165	0.299885	6.1678	11.5321	PSME1
Oxygen-dependent Proline Hydroxylation Of Hypoxia-inducible Factor Alpha R-HSA-1234176	1/64	0.156414	0.299885	6.0696	11.2606	PSME1
Gap-filling DNA Repair Synthesis And Ligation In TC-NER R-HSA-6782210	1/64	0.156414	0.299885	6.0696	11.2606	UVSSA
Hedgehog Ligand Biogenesis R-HSA-5358346	1/64	0.156414	0.299885	6.0696	11.2606	PSME1
p53-Dependent G1 DNA Damage Response R-HSA-69563	1/65	0.158656	0.299885	5.97446	10.9991	PSME1
Regulation Of RAS By GAPs R-HSA-5658442	1/65	0.158656	0.299885	5.97446	10.9991	PSME1
Dual Incision In TC-NER R-HSA-6782135	1/65	0.158656	0.299885	5.97446	10.9991	UVSSA
Activation Of NF-kappaB In B Cells R-HSA-1169091	1/66	0.160893	0.299885	5.88225	10.747	PSME1
COPII-mediated Vesicle Transport R-HSA-204005	1/66	0.160893	0.299885	5.88225	10.747	TRAPPC2L
Integrin Cell Surface Interactions R-HSA-216083	1/66	0.160893	0.299885	5.88225	10.747	CD47
Cell Cycle, Mitotic R-HSA-69278	3/523	0.160926	0.299885	2.24158	4.09494	CNTRL;NUP62;PSME1
APC/C:Cdc20 Mediated Degradation Of Securin R-HSA-174154	1/67	0.163124	0.299885	5.79283	10.5038	PSME1
G1/S DNA Damage Checkpoints R-HSA-69615	1/67	0.163124	0.299885	5.79283	10.5038	PSME1
RNA Polymerase II Transcription Termination R-HSA-73856	1/67	0.163124	0.299885	5.79283	10.5038	DDX39B
Collagen Biosynthesis And Modifying Enzymes R-HSA-1650814	1/67	0.163124	0.299885	5.79283	10.5038	COL4A6
Regulation Of PTEN Stability And Activity R-HSA-8948751	1/67	0.163124	0.299885	5.79283	10.5038	PSME1
Orc1 Removal From Chromatin R-HSA-68949	1/69	0.167569	0.301956	5.62189	10.0427	PSME1
Glycolysis R-HSA-70171	1/69	0.167569	0.301956	5.62189	10.0427	NUP62
Loss Of Nlp From Mitotic Centrosomes R-HSA-380259	1/69	0.167569	0.301956	5.62189	10.0427	CNTRL
Diseases Associated With O-glycosylation Of Proteins R-HSA-3906995	1/69	0.167569	0.301956	5.62189	10.0427	ADAMTSL2
Deubiquitination R-HSA-5688426	2/279	0.168806	0.302686	2.78474	4.95407	USP20;PSME1
SARS-CoV-2 Infection R-HSA-9694516	2/283	0.172574	0.304291	2.74454	4.82197	NUP62;TLR7
AURKA Activation By TPX2 R-HSA-8854518	1/72	0.174192	0.304291	5.38353	9.40824	CNTRL
CDK-mediated Phosphorylation And Removal Of Cdc6 R-HSA-69017	1/72	0.174192	0.304291	5.38353	9.40824	PSME1
Cdc20:Phospho-APC/C Mediated Degradation Of Cyclin A R-HSA-174184	1/72	0.174192	0.304291	5.38353	9.40824	PSME1
Regulation Of RUNX2 Expression And Activity R-HSA-8939902	1/72	0.174192	0.304291	5.38353	9.40824	PSME1
APC/C:Cdh1 Mediated Degradation Of Cdc20 And APC/C:Cdh1 Targets In Late Mitosis/Early G1 R-HSA-174178	1/73	0.176388	0.304291	5.30849	9.21059	PSME1
APC:Cdc20 Mediated Degradation Of Cell Cycle Proteins Before Cycle Checkpoint Satisfied R-HSA-179419	1/73	0.176388	0.304291	5.30849	9.21059	PSME1
Cellular Response To Hypoxia R-HSA-1234174	1/73	0.176388	0.304291	5.30849	9.21059	PSME1
Extracellular Matrix Organization R-HSA-1474244	2/291	0.180152	0.305464	2.66748	4.57195	COL4A6;CD47
APC/C:Cdc20 Mediated Degradation Of Mitotic Proteins R-HSA-176409	1/75	0.180764	0.305464	5.1645	8.83421	PSME1
ISG15 Antiviral Mechanism R-HSA-1169408	1/75	0.180764	0.305464	5.1645	8.83421	NUP62
Nuclear Envelope (NE) Reassembly R-HSA-2995410	1/75	0.180764	0.305464	5.1645	8.83421	NUP62
Activation Of APC/C And APC/C:Cdc20 Mediated Degradation Of Mitotic Proteins R-HSA-176814	1/76	0.182943	0.305464	5.09538	8.65492	PSME1
Transcriptional Regulation By Small RNAs R-HSA-5578749	1/76	0.182943	0.305464	5.09538	8.65492	NUP62
SUMOylation Of DNA Damage Response And Repair Proteins R-HSA-3108214	1/76	0.182943	0.305464	5.09538	8.65492	NUP62
ABC Transporter Disorders R-HSA-5619084	1/77	0.185116	0.307079	5.02809	8.48123	PSME1
COPI-dependent Golgi-to-ER Retrograde Traffic R-HSA-6811434	1/78	0.187284	0.307079	4.96254	8.31288	KIF5C
FCERI Mediated NF-kB Activation R-HSA-2871837	1/78	0.187284	0.307079	4.96254	8.31288	PSME1
Nuclear Events Mediated By NFE2L2 R-HSA-9759194	1/78	0.187284	0.307079	4.96254	8.31288	PSME1
Downstream Signaling Events Of B Cell Receptor (BCR) R-HSA-1168372	1/79	0.189446	0.309231	4.89867	8.14967	PSME1
Recruitment Of NuMA To Mitotic Centrosomes R-HSA-380320	1/80	0.191603	0.309971	4.83642	7.99136	CNTRL
Regulation Of APC/C Activators Between G1/S And Early Anaphase R-HSA-176408	1/80	0.191603	0.309971	4.83642	7.99136	PSME1
Centrosome Maturation R-HSA-380287	1/81	0.193754	0.310031	4.77572	7.83776	CNTRL
Signaling By NOTCH4 R-HSA-9013694	1/81	0.193754	0.310031	4.77572	7.83776	PSME1
Intracellular Signaling By Second Messengers R-HSA-9006925	2/306	0.194496	0.310031	2.53393	4.14891	PSME1;ADCY1
Global Genome Nucleotide Excision Repair (GG-NER) R-HSA-5696399	1/82	0.195899	0.310031	4.71652	7.68867	COPS7A
Cyclin E Associated Events During G1/S Transition R-HSA-69202	1/82	0.195899	0.310031	4.71652	7.68867	PSME1
Antiviral Mechanism By IFN-stimulated Genes R-HSA-1169410	1/83	0.198039	0.3112	4.65877	7.54392	NUP62
DNA Repair R-HSA-73894	2/310	0.198347	0.3112	2.50051	4.04517	UVSSA;COPS7A
Cyclin A:Cdk2-associated Events At S Phase Entry R-HSA-69656	1/84	0.200173	0.31138	4.60241	7.40332	PSME1
Degradation Of Beta-Catenin By Destruction Complex R-HSA-195253	1/84	0.200173	0.31138	4.60241	7.40332	PSME1
Hedgehog On State R-HSA-5632684	1/85	0.202301	0.313351	4.54739	7.26672	PSME1
APC/C-mediated Degradation Of Cell Cycle Proteins R-HSA-174143	1/87	0.206541	0.313689	4.44119	7.00489	PSME1
Regulation Of PLK1 Activity At G2/M Transition R-HSA-2565942	1/87	0.206541	0.313689	4.44119	7.00489	CNTRL
Opioid Signaling R-HSA-111885	1/88	0.208653	0.313689	4.38992	6.87936	ADCY1
PCP/CE Pathway R-HSA-4086400	1/88	0.208653	0.313689	4.38992	6.87936	PSME1
Regulation Of mRNA Stability By Proteins That Bind AU-rich Elements R-HSA-450531	1/88	0.208653	0.313689	4.38992	6.87936	PSME1
Peptide Hormone Metabolism R-HSA-2980736	1/89	0.21076	0.313689	4.33982	6.75726	KIF5C
Glucose Metabolism R-HSA-70326	1/89	0.21076	0.313689	4.33982	6.75726	NUP62
RAB GEFs Exchange GTP For GDP On RABs R-HSA-8876198	1/89	0.21076	0.313689	4.33982	6.75726	TRAPPC2L
Switching Of Origins To A Post-Replicative State R-HSA-69052	1/90	0.21286	0.313689	4.29084	6.63844	PSME1
Collagen Formation R-HSA-1474290	1/90	0.21286	0.313689	4.29084	6.63844	COL4A6
MAPK6/MAPK4 Signaling R-HSA-5687128	1/90	0.21286	0.313689	4.29084	6.63844	PSME1
Selenocysteine Synthesis R-HSA-2408557	1/90	0.21286	0.313689	4.29084	6.63844	SECISBP2
HCMV Late Events R-HSA-9610379	1/91	0.214956	0.3155	4.24295	6.52278	NUP62
Downstream TCR Signaling R-HSA-202424	1/94	0.221209	0.322519	4.10546	6.19369	PSME1
Transcriptional Regulation By RUNX3 R-HSA-8878159	1/95	0.223283	0.322519	4.06158	6.0896	PSME1
UCH Proteinases R-HSA-5689603	1/95	0.223283	0.322519	4.06158	6.0896	PSME1
Metabolism Of Nucleotides R-HSA-15869	1/95	0.223283	0.322519	4.06158	6.0896	AMPD3
HCMV Early Events R-HSA-9609690	1/96	0.225351	0.322943	4.01862	5.98814	NUP62
Protein Folding R-HSA-391251	1/96	0.225351	0.322943	4.01862	5.98814	TBCD
Anchoring Of Basal Body To Plasma Membrane R-HSA-5620912	1/97	0.227413	0.324621	3.97656	5.88923	CNTRL
CLEC7A (Dectin-1) Signaling R-HSA-5607764	1/99	0.231523	0.327915	3.89502	5.69871	PSME1
SLC Transporter Disorders R-HSA-5619102	1/99	0.231523	0.327915	3.89502	5.69871	NUP62
KEAP1-NFE2L2 Pathway R-HSA-9755511	1/100	0.233569	0.329532	3.85548	5.60693	PSME1
TRAF6 Mediated Induction Of NFkB And MAP Kinases Upon TLR7/8 Or 9 Activation R-HSA-975138	1/101	0.235611	0.331128	3.81673	5.51737	TLR7
ABC-family Proteins Mediated Transport R-HSA-382556	1/102	0.237646	0.33143	3.77875	5.42996	PSME1
MyD88 Dependent Cascade Initiated On Endosome R-HSA-975155	1/102	0.237646	0.33143	3.77875	5.42996	TLR7
Toll Like Receptor 7/8 (TLR7/8) Cascade R-HSA-168181	1/103	0.239677	0.332986	3.74152	5.34462	TLR7
Phase I - Functionalization Of Compounds R-HSA-211945	1/104	0.241702	0.333256	3.705	5.26128	ACSS1
MHC Class II Antigen Presentation R-HSA-2132295	1/104	0.241702	0.333256	3.705	5.26128	KIF5C
Integration Of Energy Metabolism R-HSA-163685	1/105	0.243722	0.333515	3.66919	5.1799	ADCY1
tRNA Processing R-HSA-72306	1/105	0.243722	0.333515	3.66919	5.1799	NUP62
Toll Like Receptor 9 (TLR9) Cascade R-HSA-168138	1/106	0.245737	0.335012	3.63407	5.10039	TLR7
O-linked Glycosylation R-HSA-5173105	1/107	0.247746	0.336491	3.5996	5.0227	ADAMTSL2
Gene Silencing By RNA R-HSA-211000	1/108	0.249751	0.3369	3.56578	4.94678	NUP62
Cell Cycle R-HSA-1640170	3/654	0.250215	0.3369	1.77843	2.4639	CNTRL;NUP62;PSME1
Metabolism Of Amino Acids And Derivatives R-HSA-71291	2/364	0.251063	0.3369	2.12166	2.93224	SECISBP2;PSME1
Signaling By B Cell Receptor (BCR) R-HSA-983705	1/109	0.25175	0.3369	3.53259	4.87257	PSME1
Assembly Of Pre-Replicative Complex R-HSA-68867	1/110	0.253743	0.338324	3.5	4.80001	PSME1
Golgi-to-ER Retrograde Transport R-HSA-8856688	1/112	0.257715	0.341121	3.43659	4.65967	KIF5C
Mitotic Prophase R-HSA-68875	1/112	0.257715	0.341121	3.43659	4.65967	NUP62
Interleukin-1 Signaling R-HSA-9020702	1/114	0.261666	0.34385	3.37543	4.52538	PSME1
Selenoamino Acid Metabolism R-HSA-2408522	1/114	0.261666	0.34385	3.37543	4.52538	SECISBP2
Class I MHC Mediated Antigen Processing And Presentation R-HSA-983169	2/378	0.264852	0.346513	2.0412	2.7119	PSME1;TAPBP
TCR Signaling R-HSA-202403	1/116	0.265597	0.346513	3.31639	4.39679	PSME1
Synthesis Of DNA R-HSA-69239	1/119	0.271454	0.351634	3.23158	4.21387	PSME1
Transcriptional Regulation By RUNX2 R-HSA-8878166	1/119	0.271454	0.351634	3.23158	4.21387	PSME1
Cell-Cell Communication R-HSA-1500931	1/120	0.273396	0.352894	3.20427	4.1554	CD47
HCMV Infection R-HSA-9609646	1/121	0.275333	0.354139	3.1774	4.09813	NUP62
Rab Regulation Of Trafficking R-HSA-9007101	1/122	0.277265	0.355368	3.15099	4.04202	TRAPPC2L
Immunoregulatory Interactions Between A Lymphoid And A non-Lymphoid Cell R-HSA-198933	1/123	0.279192	0.356582	3.125	3.98705	CD40
Cytokine Signaling In Immune System R-HSA-1280215	3/702	0.284801	0.361122	1.65219	2.07509	CD40;NUP62;PSME1
Cardiac Conduction R-HSA-5576891	1/126	0.284943	0.361122	3.04954	3.82859	FXYD2
Glycerophospholipid Biosynthesis R-HSA-1483206	1/127	0.28685	0.361122	3.02518	3.77784	PLA2R1
DNA Replication Pre-Initiation R-HSA-69002	1/127	0.28685	0.361122	3.02518	3.77784	PSME1
Transport Of Small Molecules R-HSA-382551	3/706	0.287707	0.361122	1.64245	2.04618	FXYD2;PSME1;ADCY1
G1/S Transition R-HSA-69206	1/129	0.290649	0.363561	2.97761	3.67926	PSME1
Fc Epsilon Receptor (FCERI) Signaling R-HSA-2454202	1/130	0.292541	0.36453	2.95438	3.63138	PSME1
Innate Immune System R-HSA-168249	4/1035	0.293669	0.36453	1.49773	1.83518	PSME1;TLR7;AMPD3;CD47
ADORA2B Mediated Anti-Inflammatory Cytokine Production R-HSA-9660821	1/131	0.294428	0.36453	2.93151	3.58442	ADCY1
Metabolism R-HSA-1430728	7/2049	0.297727	0.366515	1.33432	1.61663	SECISBP2;NUP62;PSME1;AMPD3;ADCY1;PLA2R1;ACSS1
ER To Golgi Anterograde Transport R-HSA-199977	1/133	0.298187	0.366515	2.8868	3.49313	TRAPPC2L
Cellular Responses To Stress R-HSA-2262752	3/722	0.299359	0.366515	1.60456	1.93528	NUP62;COL4A6;PSME1
Cell Surface Interactions At Vascular Wall R-HSA-202733	1/134	0.300059	0.366515	2.86495	3.44876	CD47
Factors Involved In Megakaryocyte Development And Platelet Production R-HSA-983231	1/136	0.303789	0.368598	2.82222	3.36246	KIF5C
Late Phase Of HIV Life Cycle R-HSA-162599	1/136	0.303789	0.368598	2.82222	3.36246	NUP62
Influenza Viral RNA Transcription And Replication R-HSA-168273	1/137	0.305647	0.369619	2.80133	3.32049	NUP62
PTEN Regulation R-HSA-6807070	1/139	0.309347	0.371907	2.76045	3.23881	PSME1
Cellular Responses To Stimuli R-HSA-8953897	3/736	0.309582	0.371907	1.57277	1.84412	NUP62;COL4A6;PSME1
C-type Lectin Receptors (CLRs) R-HSA-5621481	1/141	0.313029	0.374811	2.72074	3.16003	PSME1
Beta-catenin Independent WNT Signaling R-HSA-3858494	1/142	0.314862	0.37577	2.70131	3.12169	PSME1
Diseases Of Glycosylation R-HSA-3781865	1/143	0.316691	0.376717	2.68215	3.08402	ADAMTSL2
Mitotic G1 Phase And G1/S Transition R-HSA-453279	1/147	0.323957	0.383385	2.60814	2.93975	PSME1
G2/M Checkpoints R-HSA-69481	1/148	0.325762	0.383385	2.59027	2.90521	PSME1
RHO GTPase Cycle R-HSA-9012999	2/441	0.326758	0.383385	1.74264	1.94921	DDX39B;FNBP1
HIV Life Cycle R-HSA-162587	1/149	0.327562	0.383385	2.57264	2.87126	NUP62
CDC42 GTPase Cycle R-HSA-9013148	1/149	0.327562	0.383385	2.57264	2.87126	FNBP1
Interleukin-1 Family Signaling R-HSA-446652	1/152	0.332934	0.388423	2.52114	2.77278	PSME1
G Alpha (S) Signaling Events R-HSA-418555	1/153	0.334715	0.389253	2.50443	2.74103	ADCY1
DNA Replication R-HSA-69306	1/155	0.338264	0.392127	2.47165	2.6791	PSME1
Influenza Infection R-HSA-168255	1/157	0.341794	0.394962	2.43972	2.61916	NUP62
S Phase R-HSA-69242	1/161	0.348798	0.40178	2.37825	2.50491	PSME1
Toll-like Receptor Cascades R-HSA-168898	1/162	0.350538	0.40251	2.36335	2.47747	TLR7
Neutrophil Degranulation R-HSA-6798695	2/468	0.352967	0.403941	1.6394	1.70724	AMPD3;CD47
Transport To Golgi And Subsequent Modification R-HSA-948021	1/164	0.354004	0.403941	2.33412	2.42386	TRAPPC2L
Anti-inflammatory Response Favoring Leishmania Infection R-HSA-9662851	1/165	0.35573	0.404643	2.31977	2.39768	ADCY1
Regulation Of Expression Of SLITs And ROBOs R-HSA-9010553	1/167	0.359168	0.407281	2.29159	2.34651	PSME1
Separation Of Sister Chromatids R-HSA-2467813	1/170	0.364292	0.411809	2.25057	2.27262	PSME1
Ion Channel Transport R-HSA-983712	1/175	0.372743	0.420057	2.18534	2.15664	FXYD2
Apoptosis R-HSA-109581	1/178	0.377761	0.424398	2.14798	2.09105	PSME1
mRNA Splicing - Major Pathway R-HSA-72163	1/181	0.382739	0.427353	2.11186	2.02823	PRPF3
Intra-Golgi And Retrograde Golgi-to-ER Traffic R-HSA-6811442	1/181	0.382739	0.427353	2.11186	2.02823	KIF5C
Cellular Response To Chemical Stress R-HSA-9711123	1/182	0.384389	0.427883	2.10008	2.00789	PSME1
Cilium Assembly R-HSA-5617833	1/186	0.390949	0.432539	2.05426	1.92932	CNTRL
Mitotic Prometaphase R-HSA-68877	1/186	0.390949	0.432539	2.05426	1.92932	CNTRL
mRNA Splicing R-HSA-72172	1/189	0.395824	0.436605	2.02117	1.8732	PRPF3
TCF Dependent Signaling In Response To WNT R-HSA-201681	1/198	0.410219	0.451117	1.92796	1.71793	PSME1
Interferon Signaling R-HSA-913531	1/200	0.413372	0.453215	1.90839	1.68589	NUP62
Signaling By NOTCH R-HSA-157118	1/203	0.41807	0.45699	1.87976	1.63935	PSME1
Phospholipid Metabolism R-HSA-1483257	1/208	0.425819	0.462681	1.83389	1.56567	PLA2R1
Programmed Cell Death R-HSA-5357801	1/208	0.425819	0.462681	1.83389	1.56567	PSME1
Signaling By ROBO Receptors R-HSA-376176	1/209	0.427357	0.46297	1.82498	1.55148	PSME1
G Alpha (Q) Signaling Events R-HSA-416476	1/212	0.431945	0.466552	1.79876	1.50998	PTGFR
Biological Oxidations R-HSA-211859	1/218	0.441014	0.474938	1.74849	1.43145	ACSS1
Hemostasis R-HSA-109582	2/576	0.453742	0.487204	1.32356	1.04591	KIF5C;CD47
Leishmania Infection R-HSA-9658195	1/247	0.482884	0.515453	1.5401	1.12116	ADCY1
Diseases Of Metabolism R-HSA-5668914	1/247	0.482884	0.515453	1.5401	1.12116	ADAMTSL2
GPCR Downstream Signaling R-HSA-388396	2/619	0.491466	0.523081	1.22859	0.872742	PTGFR;ADCY1
PIP3 Activates AKT Signaling R-HSA-1257604	1/268	0.511266	0.541996	1.41746	0.950923	PSME1
Signaling By Rho GTPases R-HSA-194315	2/644	0.512665	0.541996	1.17922	0.787876	DDX39B;FNBP1
RAF/MAP Kinase Cascade R-HSA-5673001	1/271	0.515194	0.541996	1.4015	0.929488	PSME1
Cell Cycle Checkpoints R-HSA-69620	1/271	0.515194	0.541996	1.4015	0.929488	PSME1
Organelle Biogenesis And Maintenance R-HSA-1852241	1/275	0.520383	0.545877	1.38076	0.901896	CNTRL
MAPK1/MAPK3 Signaling R-HSA-5684996	1/277	0.522957	0.547001	1.37061	0.888506	PSME1
Signaling By Rho GTPases, Miro GTPases And RHOBTB3 R-HSA-9716542	2/660	0.525935	0.54854	1.14959	0.738701	DDX39B;FNBP1
Asparagine N-linked Glycosylation R-HSA-446203	1/282	0.529333	0.550506	1.34588	0.856165	TRAPPC2L
Metabolism Of Carbohydrates R-HSA-71387	1/285	0.533118	0.552863	1.33146	0.837505	NUP62
Signaling By WNT R-HSA-195721	1/294	0.544296	0.562851	1.28997	0.784641	PSME1
Developmental Biology R-HSA-1266738	3/1073	0.546573	0.563605	1.05852	0.639441	KMT2A;ADAM23;PSME1
Signaling By GPCR R-HSA-372790	2/689	0.549383	0.564902	1.09941	0.658502	PTGFR;ADCY1
Antigen Processing: Ubiquitination And Proteasome Degradation R-HSA-983168	1/307	0.559979	0.574176	1.23435	0.715746	PSME1
G Alpha (I) Signaling Events R-HSA-418594	1/312	0.565869	0.578585	1.2142	0.691355	ADCY1
MAPK Family Signaling Cascades R-HSA-5683057	1/318	0.572835	0.584067	1.19085	0.663492	PSME1
Class A/1 (Rhodopsin-like Receptors) R-HSA-373076	1/327	0.583079	0.592851	1.15744	0.624364	PTGFR
Signaling By Interleukins R-HSA-449147	1/453	0.703542	0.713341	0.829433	0.291651	PSME1
GPCR Ligand Binding R-HSA-500792	1/458	0.70754	0.715402	0.820148	0.283739	PTGFR
Axon Guidance R-HSA-422475	1/519	0.752252	0.758504	0.721302	0.205343	PSME1
Nervous System Development R-HSA-9675108	1/545	0.769204	0.773454	0.685909	0.179982	PSME1
Signal Transduction R-HSA-162582	5/2465	0.798484	0.800683	0.740473	0.166637	PTGFR;DDX39B;FNBP1;PSME1;ADCY1
Metabolism Of Lipids R-HSA-556833	1/732	0.861765	0.861765	0.505525	0.0752081	PLA2R1

## Sheet: WikiPathway
Term	Overlap	P-value	Adjusted p-value	Odds Ratio	Combined Score	ADAMT
Histone Modifications WP2369	3/66	0.000714629	0.040193	18.9371	137.176	KMT2E;SETBP1;KMT2A
Platelet Mediated Interactions W Vascular And Circulating Cells WP4462	2/17	0.000913478	0.040193	52.1098	364.678	CD40;TLR7
Common Pathways Underlying Drug Addiction WP2636	2/41	0.0052884	0.155126	20.0181	104.94	ADCY1;GRIA4
10Q11 21Q11 23 Copy Number Variation Syndrome WP5352	2/60	0.0110551	0.194308	13.4476	60.5796	SMARCC2;UVSSA
Extrafollicular And Follicular B Cell Activation By SARS CoV 2 WP5218	2/74	0.0164774	0.194308	10.8252	44.4456	CD40;TLR7
Nod Like Receptor NLR Signaling WP288	1/9	0.0236033	0.194308	47.9303	179.565	CD40
mRNA Vaccine Activation Of Dendritic Cell And Induction IFN1 WP5187	1/10	0.0261919	0.194308	42.6026	155.172	TLR7
SARS CoV 2 And COVID 19 Pathway WP4846	1/10	0.0261919	0.194308	42.6026	155.172	TLR7
Toll Like Receptor Signaling WP75	2/95	0.0262964	0.194308	8.37192	30.4597	CD40;TLR7
7Q11 23 Copy Number Variation Syndrome WP4932	2/104	0.0310729	0.194308	7.62976	26.4861	NUP62;BRD4
Thermogenesis WP4321	2/108	0.033298	0.194308	7.34036	24.9738	SMARCC2;ADCY1
Major Receptors Targeted By Epinephrine And Norepinephrine WP4589	1/16	0.0415827	0.194308	25.5538	81.263	ADCY1
NRXN1 Deletion Syndrome WP5398	1/17	0.0441245	0.194308	23.9555	74.759	GRIA4
MYD88 Distinct Input Output Pathway WP3877	1/18	0.0466598	0.194308	22.5452	69.0983	TLR7
Genes Associated With The Development Of Rheumatoid Arthritis WP5033	1/18	0.0466598	0.194308	22.5452	69.0983	CD40
Small Ligand GPCRs WP247	1/19	0.0491884	0.194308	21.2917	64.1326	PTGFR
Lung Pathology Of COVID 19 WP5146	1/20	0.0517104	0.194308	20.17	59.7456	TLR7
15Q13 3 Copy Number Variation Syndrome WP4942	1/20	0.0517104	0.194308	20.17	59.7456	KLF13
Neuroinflammation And Glutamatergic Signaling WP5083	2/140	0.0531654	0.194308	5.62916	16.5179	ADCY1;GRIA4
PKC Gamma Calcium Signaling In Ataxia WP4760	1/22	0.0567348	0.194308	18.2473	52.3581	GRIA4
Familial Hyperlipidemia Type 4 WP5111	1/22	0.0567348	0.194308	18.2473	52.3581	ACSS1
Post COVID Neuroinflammation WP5485	1/23	0.0592372	0.194308	17.417	49.2239	TLR7
Calcium Regulation In Cardiac Cells WP536	2/151	0.0607629	0.194308	5.21069	14.594	FXYD2;ADCY1
Smith Magenis And Potocki Lupski Syndrome Copy Number Variation WP5381	2/156	0.064333	0.194308	5.04023	13.8288	COPS7A;ETV5
Interactions Immune Cells And miRNAs In Tumor Microenvironment WP4559	1/28	0.0716518	0.194308	14.188	37.3988	TLR7
Statin Inhibition Of Cholesterol Production WP430	1/29	0.0741154	0.194308	13.6806	35.5988	ACSS1
Kleefstra Syndrome WP5351	1/29	0.0741154	0.194308	13.6806	35.5988	SMARCC2
Cannabinoid Receptor Signaling WP3869	1/29	0.0741154	0.194308	13.6806	35.5988	ADCY1
Inflammatory Response Pathway WP453	1/30	0.0765726	0.194308	13.2082	33.9387	CD40
Type I Interferon Induction And Signaling SARS CoV 2 Infection WP4868	1/31	0.0790233	0.194308	12.7673	32.4036	TLR7
Toll Like Receptor Signaling Related To MyD88 WP3858	1/31	0.0790233	0.194308	12.7673	32.4036	TLR7
Eicosanoid Metabolism Via Cyclooxygenases COX WP4719	1/31	0.0790233	0.194308	12.7673	32.4036	PTGFR
Tumor Suppressor Activity Of SMARCB1 WP4204	1/31	0.0790233	0.194308	12.7673	32.4036	SMARCC2
Prion Disease Pathway WP3995	1/32	0.0814677	0.194308	12.3548	30.9804	RFX5
Mitochondrial Immune Response To SARS CoV 2 WP5038	1/33	0.0839057	0.194308	11.9681	29.6578	TLR7
Cardiomyocyte Signaling Converging On Titin WP5344	1/33	0.0839057	0.194308	11.9681	29.6578	NUP62
BDNF TrkB Signaling WP3676	1/33	0.0839057	0.194308	11.9681	29.6578	ADCY1
Host Pathogen Interaction Of Human CoV Interferon Induction WP4880	1/33	0.0839057	0.194308	11.9681	29.6578	TLR7
miRNA Role In Immune Response In Sepsis WP4329	1/37	0.0935944	0.211187	10.6362	25.1949	TLR7
Circadian Rhythm Genes WP3594	2/201	0.0993188	0.218501	3.89161	8.98738	KMT2A;ADCY1
Renin Angiotensin Aldosterone System RAAS WP4756	1/44	0.110308	0.22954	8.90161	19.6234	CAMK1D
Prostaglandin Synthesis And Regulation WP98	1/45	0.112671	0.22954	8.69886	18.9921	PTGFR
Envelope Proteins And Potential Roles In EDMD Physiopathology WP4535	1/46	0.115028	0.22954	8.50513	18.393	ADCY1
T Cell Modulation In Pancreatic Cancer WP5078	1/46	0.115028	0.22954	8.50513	18.393	CD40
Selenium Metabolism And Selenoproteins WP28	1/47	0.117378	0.22954	8.31982	17.824	SECISBP2
Phosphodiesterases In Neuronal Function WP4222	1/54	0.133662	0.255701	7.21843	14.5267	ADCY1
Proximal Tubule Transport WP4917	1/57	0.14055	0.256518	6.8307	13.4032	FXYD2
15Q11Q13 Copy Number Variation WP5407	1/58	0.142834	0.256518	6.71053	13.0592	KLF13
TGF Beta Receptor Signaling In Skeletal Dysplasias WP4816	1/58	0.142834	0.256518	6.71053	13.0592	ADAMTSL2
Proteasome Degradation WP183	1/62	0.151911	0.267363	6.26923	11.8141	PSME1
SARS CoV 2 Innate Immunity Evasion And Cell Immune Response WP5039	1/66	0.160893	0.27762	5.88225	10.747	TLR7
Sterol Regulatory Element Binding Proteins SREBP Signaling WP1982	1/69	0.167569	0.283578	5.62189	10.0427	ACSS1
MECP2 And Associated Rett Syndrome WP3584	1/73	0.176388	0.287482	5.30849	9.21059	GRIA4
Burn Wound Healing WP5055	1/74	0.178579	0.287482	5.23551	9.01934	BRD4
Nucleotide Excision Repair In Xeroderma Pigmentosum WP5114	1/75	0.180764	0.287482	5.1645	8.83421	UVSSA
Non Genomic Actions Of 1 25 Dihydroxyvitamin D3 WP4341	1/76	0.182943	0.287482	5.09538	8.65492	CD40
Regulatory Circuits Of STAT3 Signaling WP4538	1/78	0.187284	0.289141	4.96254	8.31288	PTPRD
DNA IR Damage And Cellular Response Via ATR WP4016	1/81	0.193754	0.293971	4.77572	7.83776	SMARCC2
Androgen Receptor Signaling WP138	1/87	0.206541	0.300256	4.44119	7.00489	ETV5
Allograft Rejection WP2328	1/90	0.21286	0.300256	4.29084	6.63844	CD40
Amino Acid Metabolism WP3925	1/91	0.214956	0.300256	4.24295	6.52278	ACSS1
GPCRs Other WP117	1/91	0.214956	0.300256	4.24295	6.52278	PTGFR
G Protein Signaling WP35	1/91	0.214956	0.300256	4.24295	6.52278	ADCY1
Small Cell Lung Cancer WP4658	1/95	0.223283	0.30229	4.06158	6.0896	COL4A6
Complement System WP2806	1/95	0.223283	0.30229	4.06158	6.0896	CD40
Prader Willi And Angelman Syndrome WP3998	1/102	0.237646	0.316862	3.77875	5.42996	NUP62
Androgen Receptor Network In Prostate Cancer WP2263	1/109	0.25175	0.330656	3.53259	4.87257	SMARCC2
Spinal Cord Injury WP2431	1/119	0.271454	0.351293	3.23158	4.21387	CD47
mRNA Processing WP411	1/125	0.283031	0.360967	3.07429	3.88036	PRPF3
Measles Virus Infection WP4630	1/136	0.303789	0.381906	2.82222	3.36246	TLR7
VEGFA VEGFR2 Signaling WP3888	2/430	0.316005	0.389191	1.78844	2.06027	MICAL2;BRD4
Male Infertility WP4673	1/145	0.320333	0.389191	2.64463	3.01063	ETV5
Pleural Mesothelioma WP5087	2/437	0.322852	0.389191	1.75903	1.98869	COL4A6;CD47
Myometrial Relaxation And Contraction Pathways WP289	1/156	0.340031	0.401038	2.45558	2.64888	ADCY1
Sudden Infant Death Syndrome SIDS Susceptibility Pathways WP706	1/157	0.341794	0.401038	2.43972	2.61916	MBD1
Epithelial To Mesenchymal Transition In Colorectal Cancer WP4239	1/160	0.347054	0.401852	2.39332	2.53279	COL4A6
Chemokine Signaling WP3929	1/165	0.35573	0.406548	2.31977	2.39768	ADCY1
Cancer Pathways WP5434	2/507	0.390216	0.435487	1.50977	1.42077	COL4A6;ADCY1
Vitamin D Receptor Pathway WP2877	1/186	0.390949	0.435487	2.05426	1.92932	CD40
Focal Adhesion WP306	1/199	0.411797	0.452977	1.91812	1.70181	COL4A6
Ciliary Landscape WP4352	1/215	0.436497	0.474219	1.77327	1.47	COPS7A
Cytokine Cytokine Receptor Interaction WP5473	1/255	0.493882	0.519696	1.49099	1.05183	CD40
GPCRs Class A Rhodopsin Like WP455	1/259	0.499294	0.519696	1.46758	1.01932	PTGFR
Alzheimer 39 S Disease WP5124	1/261	0.501979	0.519696	1.45614	1.00357	KIF5C
Alzheimer 39 S Disease And miRNA Effects WP2059	1/261	0.501979	0.519696	1.45614	1.00357	KIF5C
Focal Adhesion PI3K Akt mTOR Signaling WP3932	1/303	0.555211	0.568123	1.25096	0.736072	COL4A6
PI3K Akt Signaling WP4172	1/338	0.595272	0.602114	1.11904	0.580486	COL4A6
ADHD And Autism ASD Pathways WP5420	1/370	0.628788	0.628788	1.02033	0.473391	GRIA4

## Sheet: BioPlanet
Term	Overlap	P-value	Adjusted p-value	Odds Ratio	Combined Score	Genes
Dendritic cells in regulating TH1 and TH2 development	2/17	0.000913478	0.0993347	52.1098	364.678	CD40;TLR7
Signaling by FGFR1 fusion mutants	2/19	0.00114467	0.0993347	45.9746	311.369	CNTRL;MYO18A
Antigen processing and presentation	3/81	0.00129567	0.0993347	15.2838	101.618	RFX5;PSME1;TAPBP
Signaling by FGFR1 mutants	2/30	0.00285812	0.136568	27.8978	163.414	CNTRL;MYO18A
Hypothetical network for drug addiction	2/32	0.0032479	0.136568	26.0353	149.176	ADCY1;GRIA4
Primary immunodeficiency	2/35	0.00387644	0.136568	23.6649	131.407	CD40;RFX5
Activation of NMDA receptor upon glutamate binding and postsynaptic events	2/37	0.00432435	0.136568	22.3104	121.446	ADCY1;GRIA4
Signaling by FGFR in disease	3/128	0.00475019	0.136568	9.51456	50.8988	CNTRL;MYO18A;ADCY1
Beta-3 integrin cell surface interactions	2/43	0.00580405	0.145861	19.0397	98.0392	COL4A6;CD47
Signaling by FGFR mutants	2/45	0.00634178	0.145861	18.1523	91.8615	CNTRL;MYO18A
CREB phosphorylation through the activation of adenylate cyclase	1/5	0.0131812	0.19785	95.8798	415.061	ADCY1
Spermatogenesis regulation by CREM	1/7	0.0184058	0.19785	63.9135	255.34	ADCY1
Antigen processing: cross presentation	2/79	0.0186385	0.19785	10.1197	40.3019	PSME1;TAPBP
ECM-receptor interaction	2/84	0.0209124	0.19785	9.50024	36.7413	COL4A6;CD47
Bystander B cell activation	1/8	0.0210079	0.19785	54.7802	211.608	CD40
NOD-like receptor (NLR) proteins	1/8	0.0210079	0.19785	54.7802	211.608	CD40
HIF-1 degradation in normoxia	2/88	0.0228106	0.19785	9.05654	34.2385	USP20;PSME1
Salivary secretion	2/89	0.023296	0.19785	8.95199	33.6548	FXYD2;ADCY1
Prostanoid ligand receptors	1/9	0.0236033	0.19785	47.9303	179.565	PTGFR
Thymic stromal lymphopoietin (TSLP) pathway	2/90	0.0237855	0.19785	8.84982	33.0866	CD40;PSME1
TRAF6-mediated IRF7 activation in TLR7/8 or 9 signaling	1/10	0.0261919	0.19785	42.6026	155.172	TLR7
Ethanol oxidation	1/10	0.0261919	0.19785	42.6026	155.172	ACSS1
B lymphocyte cell surface molecules	1/11	0.0287737	0.19785	38.3404	136.043	CD40
Bone mineralization regulation	1/11	0.0287737	0.19785	38.3404	136.043	COL4A6
Mechanism of protein import into the nucleus	1/11	0.0287737	0.19785	38.3404	136.043	NUP62
Cystic fibrosis transmembrane conductance regulator (CFTR) and beta 2 adrenergic receptor (b2AR) pathway	1/11	0.0287737	0.19785	38.3404	136.043	ADCY1
Vitamin C in the brain	1/11	0.0287737	0.19785	38.3404	136.043	COL4A6
Pancreatic secretion	2/101	0.0294449	0.19785	7.86215	27.7159	FXYD2;ADCY1
Phospholipase C epsilon pathway	1/12	0.0313489	0.19785	34.8531	120.682	ADCY1
Beta-arrestins in GPCR desensitization	1/12	0.0313489	0.19785	34.8531	120.682	ADCY1
Toll-like receptor endosomal trafficking and processing	1/12	0.0313489	0.19785	34.8531	120.682	TLR7
Amoebiasis	2/105	0.0316234	0.19785	7.5553	26.0949	COL4A6;ADCY1
Disease	5/674	0.0325283	0.19785	3.00168	10.2827	CNTRL;NUP62;MYO18A;PSME1;ADCY1
Adenylate cyclase inhibitory pathway	1/13	0.0339173	0.19785	31.9471	108.104	ADCY1
Purine salvage	1/13	0.0339173	0.19785	31.9471	108.104	AMPD3
Angiotensin-converting enzyme 2 regulation of heart function	1/13	0.0339173	0.19785	31.9471	108.104	COL4A6
Signal regulatory protein (SIRP) family interactions	1/13	0.0339173	0.19785	31.9471	108.104	CD47
Platelet amyloid precursor protein pathway	1/14	0.0364791	0.19785	29.4882	97.6358	COL4A6
Mechanisms of transcriptional repression by DNA methylation	1/15	0.0390342	0.19785	27.3805	88.8036	MBD1
Eicosanoid ligand-binding G-protein coupled receptors	1/15	0.0390342	0.19785	27.3805	88.8036	PTGFR
GluR2-containing AMPA receptor trafficking	1/16	0.0415827	0.19785	25.5538	81.263	GRIA4
CD40L signaling pathway	1/16	0.0415827	0.19785	25.5538	81.263	CD40
LPA4-mediated signaling events	1/16	0.0415827	0.19785	25.5538	81.263	ADCY1
Post-chaperonin tubulin folding pathway	1/17	0.0441245	0.19785	23.9555	74.759	TBCD
Beta-arrestin-dependent recruitment of Src kinases in GPCR signaling	1/17	0.0441245	0.19785	23.9555	74.759	ADCY1
SUMOylation by RanBP2 regulates transcriptional repression	1/17	0.0441245	0.19785	23.9555	74.759	NUP62
Ion channel function in vascular endothelium	1/17	0.0441245	0.19785	23.9555	74.759	ADCY1
Chromatin remodeling by hSWI/SNF ATP-dependent complexes	1/17	0.0441245	0.19785	23.9555	74.759	SMARCC2
Unblocking of NMDA receptor, glutamate binding and activation	1/17	0.0441245	0.19785	23.9555	74.759	GRIA4
Spliceosome	2/127	0.0446722	0.19785	6.21867	19.3301	DDX39B;PRPF3
HIV factor interactions with host	2/128	0.0453059	0.19785	6.169	19.0888	NUP62;PSME1
PKA activation in glucagon signaling	1/18	0.0466598	0.19785	22.5452	69.0983	ADCY1
Immune system	6/998	0.047563	0.19785	2.4393	7.42938	CD40;KIF5C;NUP62;PSME1;TLR7;TAPBP
Inhibition of T cell receptor signaling by activated Csk	1/19	0.0491884	0.19785	21.2917	64.1326	ADCY1
Small ligand GPCRs	1/19	0.0491884	0.19785	21.2917	64.1326	PTGFR
TNF-alpha effects on cytokine activity, cell motility, and apoptosis	2/135	0.0498343	0.19785	5.84225	17.5212	CD40;FNBP1
GATA3-mediated activation of Th2 cytokine expression	1/20	0.0517104	0.19785	20.17	59.7456	ADCY1
Acute myocardial infarction	1/20	0.0517104	0.19785	20.17	59.7456	COL4A6
ChREBP regulation by carbohydrates and cAMP	1/21	0.0542259	0.19785	19.1606	55.8454	ADCY1
Oxidative stress-induced gene expression via Nrf2	1/21	0.0542259	0.19785	19.1606	55.8454	FXYD2
Toll-like receptor signaling pathway regulation	2/142	0.0545197	0.19785	5.54818	16.1407	CD40;TLR7
Smooth muscle contraction	1/22	0.0567348	0.19785	18.2473	52.3581	SORBS3
Progesterone-initiated oocyte maturation	1/23	0.0592372	0.19785	17.417	49.2239	ADCY1
Proximal tubule bicarbonate reclamation	1/23	0.0592372	0.19785	17.417	49.2239	FXYD2
BAD phosphorylation mediated by IGF1R signaling	1/23	0.0592372	0.19785	17.417	49.2239	ADCY1
CREB transcription factor and its extracellular signals	1/23	0.0592372	0.19785	17.417	49.2239	ADCY1
Th1/Th2 differentiation pathway	1/23	0.0592372	0.19785	17.417	49.2239	CD40
Eicosanoid metabolism	1/23	0.0592372	0.19785	17.417	49.2239	PTGFR
Calcium regulation in the cardiac cell	2/149	0.0593549	0.19785	5.28211	14.9179	FXYD2;ADCY1
TGF-beta regulation of extracellular matrix	4/565	0.0623403	0.204832	2.82091	7.82844	BTN2A1;MICAL2;PLA2R1;ETV5
Ck1/Cdk5 regulation by type 1 glutamate receptors	1/25	0.0642225	0.208045	15.9639	43.8274	ADCY1
BAD phosphorylation regulation	1/27	0.0691818	0.212189	14.7345	39.356	ADCY1
Kinesins	1/27	0.0691818	0.212189	14.7345	39.356	KIF5C
Control of gene expression by vitamin D receptor	1/27	0.0691818	0.212189	14.7345	39.356	SMARCC2
Purine metabolism	2/164	0.0701889	0.212189	4.7894	12.7233	AMPD3;ADCY1
Statin pathway	1/29	0.0741154	0.212189	13.6806	35.5988	ACSS1
T cell receptor regulation of apoptosis	4/603	0.0753	0.212189	2.63678	6.81943	MBD1;PSME1;TLR7;PLA2R1
Adaptive immune system	4/606	0.0763778	0.212189	2.62323	6.74711	CD40;KIF5C;PSME1;TAPBP
Glutamate binding and activation of AMPA receptors and synaptic plasticity	1/30	0.0765726	0.212189	13.2082	33.9387	GRIA4
Asthma	1/30	0.0765726	0.212189	13.2082	33.9387	CD40
Inflammatory response pathway	1/30	0.0765726	0.212189	13.2082	33.9387	CD40
Interferon-beta enhancer pathway	1/30	0.0765726	0.212189	13.2082	33.9387	SMARCC2
Signaling pathway from G-protein families	1/30	0.0765726	0.212189	13.2082	33.9387	ADCY1
Prostaglandin biosynthesis and regulation	1/31	0.0790233	0.213828	12.7673	32.4036	PTGFR
CD40/CD40L signaling	1/31	0.0790233	0.213828	12.7673	32.4036	CD40
Calcium signaling pathway	2/178	0.0808362	0.215374	4.4053	11.0808	PTGFR;ADCY1
Prothrombin activation intrinsic pathway	1/32	0.0814677	0.215374	12.3548	30.9804	COL4A6
Glucagon signaling in metabolic regulation	1/33	0.0839057	0.216835	11.9681	29.6578	ADCY1
Propanoate metabolism	1/33	0.0839057	0.216835	11.9681	29.6578	ACSS1
Transmission across chemical synapses	2/190	0.0903354	0.227954	4.12161	9.90928	ADCY1;GRIA4
Phospholipids as signaling intermediaries	1/36	0.0911817	0.227954	10.9407	26.2018	ADCY1
Ion transport by P-type ATPases	1/36	0.0911817	0.227954	10.9407	26.2018	FXYD2
Allograft rejection	1/37	0.0935944	0.230002	10.6362	25.1949	CD40
Signaling events mediated by HDAC class II	1/38	0.0960008	0.230002	10.3482	24.25	NUP62
Transport of mature mRNAs derived from intronless transcripts	1/38	0.0960008	0.230002	10.3482	24.25	NUP62
EGFR interaction with phospholipase C-gamma	1/38	0.0960008	0.230002	10.3482	24.25	ADCY1
HIV infection	2/200	0.0984918	0.233537	3.91147	9.06593	NUP62;PSME1
PAC1 receptor pathway	1/40	0.100795	0.234597	9.81657	22.5258	ADCY1
Messenger RNA processing	2/203	0.100979	0.234597	3.8525	8.8332	PRPF3;NUP62
FOXM1 transcription factor network	1/41	0.103183	0.23732	9.57067	21.7374	ETV5
Aldosterone-regulated sodium reabsorption	1/42	0.105564	0.237944	9.33677	20.9932	FXYD2
Hexose transport	1/42	0.105564	0.237944	9.33677	20.9932	NUP62
Transmembrane transport of small molecules	3/432	0.106557	0.237944	2.72979	6.11219	FXYD2;NUP62;ADCY1
G-protein-mediated events	1/44	0.110308	0.241628	8.90161	19.6234	ADCY1
Interactions of HIV Vpr protein with host cellular proteins	1/44	0.110308	0.241628	8.90161	19.6234	NUP62
G alpha (z) signaling events	1/45	0.112671	0.24219	8.69886	18.9921	ADCY1
Interleukin-12/STAT4 pathway	1/45	0.112671	0.24219	8.69886	18.9921	ETV5
Syndecan 1 pathway	1/46	0.115028	0.244967	8.50513	18.393	COL4A6
Intestinal immune network for IgA production	1/48	0.119723	0.252626	8.14239	17.2828	CD40
Muscle contraction	1/49	0.122061	0.253877	7.97236	16.7677	SORBS3
Aquaporin-mediated transport	1/50	0.124393	0.253877	7.80926	16.2769	ADCY1
Non-coding RNA metabolism	1/50	0.124393	0.253877	7.80926	16.2769	NUP62
Malaria	1/51	0.12672	0.253877	7.65269	15.8088	CD40
Type I interferon (interferon-alpha/beta) pathway	1/51	0.12672	0.253877	7.65269	15.8088	PTPRD
Pyruvate metabolism	1/52	0.12904	0.253877	7.50226	15.3619	ACSS1
Autoimmune thyroid disease	1/52	0.12904	0.253877	7.50226	15.3619	CD40
GABA A and B receptor activation	1/53	0.131354	0.253877	7.35762	14.9349	ADCY1
Protein folding	1/53	0.131354	0.253877	7.35762	14.9349	TBCD
Thrombin signaling through protease-activated receptors	1/53	0.131354	0.253877	7.35762	14.9349	ADCY1
Phospholipase C-mediated cascade	1/54	0.133662	0.256185	7.21843	14.5267	ADCY1
Transport of mature transcript to cytoplasm	1/55	0.135964	0.258444	7.0844	14.136	NUP62
Autodegradation of Cdh1 by Cdh1-APC/C	1/58	0.142834	0.269277	6.71053	13.0592	PSME1
Antigen presentation: folding, assembly, and peptide loading of class I MHC proteins	2/255	0.146541	0.27402	3.05262	5.8624	PSME1;TAPBP
Ion channel transport	1/61	0.14965	0.275357	6.37404	12.1072	FXYD2
Licensing factor removal from origins	1/61	0.14965	0.275357	6.37404	12.1072	PSME1
Proteasome degradation	1/63	0.154165	0.278877	6.1678	11.5321	PSME1
Collagen biosynthesis and modifying enzymes	1/64	0.156414	0.278877	6.0696	11.2606	COL4A6
Ubiquitin-mediated degradation of phosphorylated Cdc25A	1/64	0.156414	0.278877	6.0696	11.2606	PSME1
Endothelins	1/64	0.156414	0.278877	6.0696	11.2606	ADCY1
LPA receptor mediated events	1/65	0.158656	0.280344	5.97446	10.9991	ADCY1
Beta-1 integrin cell surface interactions	1/66	0.160893	0.280344	5.88225	10.747	COL4A6
Destabilization of mRNA by AUF1 (hnRNP D0)	1/66	0.160893	0.280344	5.88225	10.747	PSME1
Neuroactive ligand-receptor interaction	2/272	0.162249	0.280581	2.85795	5.19754	PTGFR;GRIA4
Activation of NF-kappaB in B cells	1/68	0.165349	0.280935	5.70608	10.2692	PSME1
Phase I of biological oxidations: functionalization of compounds	1/69	0.167569	0.280935	5.62189	10.0427	ACSS1
Antiviral mechanism by interferon-stimulated genes	1/70	0.169782	0.280935	5.54013	9.82398	NUP62
Signaling events mediated by HDAC class I	1/70	0.169782	0.280935	5.54013	9.82398	NUP62
Long-term potentiation	1/70	0.169782	0.280935	5.54013	9.82398	ADCY1
Nucleotide metabolism	1/70	0.169782	0.280935	5.54013	9.82398	AMPD3
Viral myocarditis	1/71	0.17199	0.281503	5.46071	9.6126	CD40
Neuronal system	2/283	0.172574	0.281503	2.74454	4.82197	ADCY1;GRIA4
Cyclin A-Cdk2-associated events at S phase entry	1/72	0.174192	0.282142	5.38353	9.40824	PSME1
Degradation of beta-catenin by the destruction complex	1/73	0.176388	0.283263	5.30849	9.21059	PSME1
Gastric acid secretion	1/74	0.178579	0.283263	5.23551	9.01934	ADCY1
Integrins in angiogenesis	1/74	0.178579	0.283263	5.23551	9.01934	COL4A6
Glycolysis and gluconeogenesis	1/75	0.180764	0.284765	5.1645	8.83421	ACSS1
Apoptosis regulation	1/78	0.187284	0.29303	4.96254	8.31288	PSME1
Cardiac muscle contraction	1/80	0.191603	0.295763	4.83642	7.99136	FXYD2
Opioid signaling	1/80	0.191603	0.295763	4.83642	7.99136	ADCY1
APC/C-mediated degradation of cell cycle proteins	1/82	0.195899	0.298389	4.71652	7.68867	PSME1
Regular glucocorticoid receptor pathway	1/82	0.195899	0.298389	4.71652	7.68867	SMARCC2
Small cell lung cancer	1/84	0.200173	0.300913	4.60241	7.40332	COL4A6
Differentiation pathway in PC12 cells	1/84	0.200173	0.300913	4.60241	7.40332	ADCY1
Progesterone-mediated oocyte maturation	1/86	0.204424	0.301394	4.49367	7.13396	ADCY1
Non-class A, B, C GPCRs	1/86	0.204424	0.301394	4.49367	7.13396	PTGFR
mRNA stability regulation by proteins that bind AU-rich elements	1/86	0.204424	0.301394	4.49367	7.13396	PSME1
Mitotic G2-G2/M phases	1/87	0.206541	0.301825	4.44119	7.00489	CNTRL
Androgen receptor signaling, proteolysis, and transcription regulation	1/88	0.208653	0.301825	4.38992	6.87936	ETV5
DNA replication pre-Initiation	1/88	0.208653	0.301825	4.38992	6.87936	PSME1
Gap junction pathway	1/90	0.21286	0.305987	4.29084	6.63844	ADCY1
Extracellular matrix organization	1/93	0.21913	0.313043	4.15029	6.30052	COL4A6
Cell surface interactions at the vascular wall	1/94	0.221209	0.314062	4.10546	6.19369	CD47
G-protein signaling pathways	1/95	0.223283	0.315061	4.06158	6.0896	ADCY1
Mitochondrial pathway of apoptosis: BH3-only Bcl-2 family	1/97	0.227413	0.318767	3.97656	5.88923	CD47
Downstream signaling events Of B cell receptor (BCR)	1/98	0.229471	0.318767	3.93537	5.79278	PSME1
Granule cell survival pathway	1/99	0.231523	0.318767	3.89502	5.69871	ADCY1
Senescence and autophagy	1/99	0.231523	0.318767	3.89502	5.69871	KMT2A
Dilated cardiomyopathy	1/100	0.233569	0.318767	3.85548	5.60693	ADCY1
GnRH signaling pathway	1/101	0.235611	0.318767	3.81673	5.51737	ADCY1
Melanogenesis	1/101	0.235611	0.318767	3.81673	5.51737	ADCY1
Signaling by ERBB2	1/102	0.237646	0.319641	3.77875	5.42996	ADCY1
MHC class II antigen presentation	1/103	0.239677	0.320498	3.74152	5.34462	KIF5C
Chagas disease	1/104	0.241702	0.321338	3.705	5.26128	ADCY1
G alpha i pathway	1/108	0.249751	0.33013	3.56578	4.94678	ADCY1
Gene expression	4/968	0.253891	0.333686	1.6075	2.20364	ZNF419;NUP62;PSME1;ZNF337
Signaling by EGFR in cancer	1/111	0.255732	0.334195	3.46801	4.72906	ADCY1
S phase	1/112	0.257715	0.334884	3.43659	4.65967	PSME1
Oocyte meiosis	1/113	0.259693	0.335559	3.40573	4.5918	ADCY1
Fas signaling pathway	1/115	0.263634	0.337163	3.34565	4.4604	CD47
Generic transcription pathway	2/377	0.263867	0.337163	2.04675	2.7269	ZNF419;ZNF337
Vascular smooth muscle contraction	1/116	0.265597	0.337499	3.31639	4.39679	ADCY1
Cell cycle checkpoints	1/117	0.267554	0.33807	3.28763	4.33452	PSME1
HIV life cycle	1/118	0.269507	0.33807	3.25937	4.27356	NUP62
Immunoregulatory interactions between a lymphoid and a non-lymphoid cell	1/119	0.271454	0.33807	3.23158	4.21387	CD40
G alpha s pathway	1/120	0.273396	0.33807	3.20427	4.1554	ADCY1
Interleukin-1 regulation of extracellular matrix	1/120	0.273396	0.33807	3.20427	4.1554	AMPD3
Signaling by PDGF	1/122	0.277265	0.341021	3.15099	4.04202	ADCY1
G alpha (s) signaling events	1/125	0.283031	0.342617	3.07429	3.88036	ADCY1
Integration of energy metabolism	1/125	0.283031	0.342617	3.07429	3.88036	ADCY1
Factors involved in megakaryocyte development and platelet production	1/125	0.283031	0.342617	3.07429	3.88036	KIF5C
Cell-cell communication	1/129	0.290649	0.349996	2.97761	3.67926	CD47
Cell adhesion molecules (CAMs)	1/133	0.298187	0.357203	2.8868	3.49313	CD40
Mitotic G1-G1/S phases	1/135	0.301927	0.359343	2.84343	3.40521	PSME1
NGF signaling via TRKA from the plasma membrane	1/136	0.303789	0.359343	2.82222	3.36246	ADCY1
Adrenergic pathway	1/137	0.305647	0.359343	2.80133	3.32049	ADCY1
Capped intron-containing pre-mRNA processing	1/138	0.307499	0.359343	2.78074	3.27928	NUP62
Biological oxidations	1/139	0.309347	0.359343	2.76045	3.23881	ACSS1
Systemic lupus erythematosus	1/139	0.309347	0.359343	2.76045	3.23881	CD40
Influenza infection	1/142	0.314862	0.363911	2.70131	3.12169	NUP62
Signaling by the B cell receptor (BCR)	1/151	0.331148	0.38082	2.53808	2.80506	PSME1
Phagosome	1/154	0.336492	0.383456	2.48793	2.70981	PLA2R1
Myometrial relaxation and contraction pathways	1/155	0.338264	0.383456	2.47165	2.6791	ADCY1
Cell cycle	2/453	0.338442	0.383456	1.69523	1.83662	CNTRL;PSME1
Toll receptor cascades	1/159	0.345305	0.389315	2.40859	2.56112	TLR7
Hemostasis pathway	2/468	0.352967	0.396012	1.6394	1.70724	KIF5C;CD47
Interferon signaling	1/168	0.360881	0.402925	2.27775	2.3215	NUP62
Interleukin-2 signaling pathway	3/847	0.390668	0.434076	1.35803	1.27641	KLF13;TBCD;SORBS3
Chemokine signaling pathway	1/189	0.395824	0.43769	2.02117	1.8732	ADCY1
Amino acid metabolism	1/195	0.405458	0.446198	1.95807	1.76762	PSME1
G alpha (i) signaling events	1/199	0.411797	0.448879	1.91812	1.70181	ADCY1
Jak-STAT signaling pathway	1/199	0.411797	0.448879	1.91812	1.70181	PTPRD
Gastrin-CREB signaling pathway via PKC and MAPK	1/206	0.422732	0.45814	1.85197	1.59458	PTGFR
DNA replication	1/207	0.424277	0.45814	1.84289	1.58003	PSME1
Antigen-activated B-cell receptor generation of second messengers	1/211	0.43042	0.4626	1.80742	1.52364	CD40
Signaling by NGF	1/221	0.445495	0.476576	1.72439	1.39429	ADCY1
Focal adhesion	1/233	0.46307	0.493084	1.6342	1.25813	COL4A6
Carbohydrate metabolism	1/235	0.465945	0.493859	1.62007	1.23723	NUP62
Apoptosis	1/242	0.475891	0.502087	1.57245	1.16765	PSME1
SLC-mediated transmembrane transport	1/251	0.488412	0.512944	1.51515	1.08575	NUP62
Class A GPCRs (rhodopsin-like)	1/253	0.491154	0.513479	1.50298	1.06861	PTGFR
Cytokine-cytokine receptor interaction	1/265	0.507307	0.527967	1.43378	0.973022	CD40
Immune system signaling by interferons, interleukins, prolactin, and growth hormones	1/280	0.526793	0.545776	1.35567	0.868912	NUP62
Oncostatin M	1/311	0.564697	0.582423	1.21818	0.696146	AMPD3
Innate immune system	1/319	0.573985	0.58936	1.18705	0.658991	TLR7
Pathways in cancer	1/325	0.580823	0.59373	1.16471	0.632796	COL4A6
Metabolism	4/1615	0.629269	0.640407	0.929122	0.430366	NUP62;AMPD3;ADCY1;ACSS1
GPCR ligand binding	1/410	0.666874	0.675687	0.918657	0.372198	PTGFR
Protein metabolism	1/442	0.694557	0.70065	0.850602	0.310028	TBCD
Signaling by GPCR	2/977	0.738598	0.741823	0.763077	0.231213	PTGFR;ADCY1
Signal transduction	1/1020	0.93784	0.93784	0.357213	0.0229244	ADCY1

## Sheet: KEGG
Term	Overlap	P-value	Adjusted P-value	Odds Ratio	Combined Score	Genes
Antigen processing and presentation	3/78	0.00116177	0.132442	15.8976	107.433	RFX5;PSME1;TAPBP
Primary immunodeficiency	2/38	0.00455688	0.208371	21.6895	116.931	CD40;RFX5
Lysine degradation	2/63	0.0121367	0.208371	12.7843	56.3983	KMT2E;KMT2A
Transcriptional misregulation in cancer	3/192	0.0143546	0.208371	6.27238	26.618	CD40;KMT2A;ETV5
Thyroid hormone synthesis	2/75	0.0169005	0.208371	10.6763	43.5639	FXYD2;ADCY1
cAMP signaling pathway	3/216	0.0195888	0.208371	5.55887	21.8619	FXYD2;ADCY1;GRIA4
Insulin secretion	2/86	0.0218529	0.208371	9.27311	35.455	FXYD2;ADCY1
ECM-receptor interaction	2/88	0.0228106	0.208371	9.05654	34.2385	COL4A6;CD47
Bile secretion	2/90	0.0237855	0.208371	8.84982	33.0866	FXYD2;ADCY1
Salivary secretion	2/93	0.0252796	0.208371	8.55678	31.4698	FXYD2;ADCY1
Calcium signaling pathway	3/240	0.0257476	0.208371	4.98987	18.26	PTGFR;CAMK1D;ADCY1
Circadian entrainment	2/97	0.0273297	0.208371	8.19484	29.4996	ADCY1;GRIA4
Aldosterone synthesis and secretion	2/98	0.0278525	0.208371	8.10907	29.0372	CAMK1D;ADCY1
Amoebiasis	2/102	0.0299836	0.208371	7.78314	27.2963	COL4A6;ADCY1
Pancreatic secretion	2/102	0.0299836	0.208371	7.78314	27.2963	FXYD2;ADCY1
Protein digestion and absorption	2/103	0.0305263	0.208371	7.70569	26.8864	FXYD2;COL4A6
Toll-like receptor signaling pathway	2/104	0.0310729	0.208371	7.62976	26.4861	CD40;TLR7
Glutamatergic synapse	2/114	0.0367492	0.232745	6.94503	22.9439	ADCY1;GRIA4
Purine metabolism	2/129	0.045943	0.258997	6.12012	18.8521	AMPD3;ADCY1
Relaxin signaling pathway	2/129	0.045943	0.258997	6.12012	18.8521	COL4A6;ADCY1
Dopaminergic synapse	2/132	0.047874	0.258997	5.97798	18.1682	KIF5C;GRIA4
Phospholipase D signaling pathway	2/148	0.0586552	0.258997	5.31856	15.0839	PTGFR;ADCY1
Retrograde endocannabinoid signaling	2/148	0.0586552	0.258997	5.31856	15.0839	ADCY1;GRIA4
Proximal tubule bicarbonate reclamation	1/23	0.0592372	0.258997	17.417	49.2239	FXYD2
Adrenergic signaling in cardiomyocytes	2/150	0.0600574	0.258997	5.24616	14.7546	FXYD2;ADCY1
Spliceosome	2/150	0.0600574	0.258997	5.24616	14.7546	DDX39B;PRPF3
Oxytocin signaling pathway	2/154	0.0628965	0.258997	5.10707	14.1275	CAMK1D;ADCY1
Cushing syndrome	2/155	0.0636134	0.258997	5.07343	13.977	KMT2A;ADCY1
cGMP-PKG signaling pathway	2/167	0.0724288	0.28472	4.7016	12.3424	FXYD2;ADCY1
Glyoxylate and dicarboxylate metabolism	1/30	0.0765726	0.290602	13.2082	33.9387	ACSS1
Asthma	1/31	0.0790233	0.290602	12.7673	32.4036	CD40
Tuberculosis	2/180	0.0823965	0.292151	4.35536	10.8719	RFX5;PLA2R1
Propanoate metabolism	1/34	0.0863374	0.292151	11.6049	28.4261	ACSS1
RNA transport	2/186	0.0871328	0.292151	4.21206	10.2788	DDX39B;NUP62
Aldosterone-regulated sodium reabsorption	1/37	0.0935944	0.302385	10.6362	25.1949	FXYD2
Allograft rejection	1/38	0.0960008	0.302385	10.3482	24.25	CD40
Epstein-Barr virus infection	2/202	0.100148	0.302385	3.87196	8.9098	CD40;TAPBP
Nicotine addiction	1/40	0.100795	0.302385	9.81657	22.5258	GRIA4
Human T-cell leukemia virus 1 infection	2/219	0.11453	0.305599	3.56556	7.72627	CD40;ADCY1
Proteasome	1/46	0.115028	0.305599	8.50513	18.393	PSME1
Carbohydrate digestion and absorption	1/47	0.117378	0.305599	8.31982	17.824	FXYD2
Pyruvate metabolism	1/47	0.117378	0.305599	8.31982	17.824	ACSS1
Intestinal immune network for IgA production	1/48	0.119723	0.305599	8.14239	17.2828	CD40
Human cytomegalovirus infection	2/225	0.119728	0.305599	3.46857	7.36214	ADCY1;TAPBP
Malaria	1/50	0.124393	0.305599	7.80926	16.2769	CD40
Thermogenesis	2/232	0.125867	0.305599	3.36181	6.96744	SMARCC2;ADCY1
Ovarian steroidogenesis	1/51	0.12672	0.305599	7.65269	15.8088	ADCY1
Autoimmune thyroid disease	1/53	0.131354	0.305599	7.35762	14.9349	CD40
Endocrine and other factor-regulated calcium reabsorption	1/53	0.131354	0.305599	7.35762	14.9349	FXYD2
Regulation of lipolysis in adipocytes	1/55	0.135964	0.309998	7.0844	14.136	ADCY1
Herpes simplex virus 1 infection	3/498	0.145204	0.317015	2.35782	4.54968	ZNF419;ZNF337;TAPBP
Viral myocarditis	1/60	0.147384	0.317015	6.4824	12.4119	CD40
Mineral absorption	1/60	0.147384	0.317015	6.4824	12.4119	FXYD2
Cortisol synthesis and secretion	1/65	0.158656	0.332074	5.97446	10.9991	ADCY1
Glycolysis / Gluconeogenesis	1/67	0.163124	0.332074	5.79283	10.5038	ACSS1
Long-term potentiation	1/67	0.163124	0.332074	5.79283	10.5038	ADCY1
Amphetamine addiction	1/69	0.167569	0.335137	5.62189	10.0427	GRIA4
Non-small cell lung cancer	1/72	0.174192	0.342378	5.38353	9.40824	KIF5C
Glioma	1/75	0.180764	0.347592	5.1645	8.83421	CAMK1D
Gastric acid secretion	1/76	0.182943	0.347592	5.09538	8.65492	ADCY1
Huntington disease	2/306	0.194496	0.35184	2.53393	4.14891	KIF5C;GRIA4
Cardiac muscle contraction	1/87	0.206541	0.35184	4.44119	7.00489	FXYD2
Gap junction	1/88	0.208653	0.35184	4.38992	6.87936	ADCY1
GABAergic synapse	1/89	0.21076	0.35184	4.33982	6.75726	ADCY1
Morphine addiction	1/91	0.214956	0.35184	4.24295	6.52278	ADCY1
Small cell lung cancer	1/92	0.217046	0.35184	4.19611	6.41018	COL4A6
GnRH signaling pathway	1/93	0.21913	0.35184	4.15029	6.30052	ADCY1
Dilated cardiomyopathy	1/96	0.225351	0.35184	4.01862	5.98814	ADCY1
Prostate cancer	1/97	0.227413	0.35184	3.97656	5.88923	ETV5
Neuroactive ligand-receptor interaction	2/341	0.228483	0.35184	2.26826	3.34863	PTGFR;GRIA4
mRNA surveillance pathway	1/98	0.229471	0.35184	3.93537	5.79278	DDX39B
Inflammatory mediator regulation of TRP channels	1/98	0.229471	0.35184	3.93537	5.79278	ADCY1
AGE-RAGE signaling pathway in diabetic complications	1/100	0.233569	0.35184	3.85548	5.60693	COL4A6
Progesterone-mediated oocyte maturation	1/100	0.233569	0.35184	3.85548	5.60693	ADCY1
Melanogenesis	1/101	0.235611	0.35184	3.81673	5.51737	ADCY1
Chagas disease	1/102	0.237646	0.35184	3.77875	5.42996	ADCY1
Longevity regulating pathway	1/102	0.237646	0.35184	3.77875	5.42996	ADCY1
NF-kappa B signaling pathway	1/104	0.241702	0.353257	3.705	5.26128	CD40
Parathyroid hormone synthesis, secretion and action	1/106	0.245737	0.354608	3.63407	5.10039	ADCY1
Amyotrophic lateral sclerosis	2/364	0.251063	0.357765	2.12166	2.93224	KIF5C;NUP62
Toxoplasmosis	1/112	0.257715	0.361037	3.43659	4.65967	CD40
Cholinergic synapse	1/113	0.259693	0.361037	3.40573	4.5918	ADCY1
Growth hormone synthesis, secretion and action	1/119	0.271454	0.37284	3.23158	4.21387	ADCY1
Thyroid hormone signaling pathway	1/121	0.275333	0.373667	3.1774	4.09813	FXYD2
Platelet activation	1/124	0.281114	0.377024	3.09944	3.93317	ADCY1
Oocyte meiosis	1/129	0.290649	0.385279	2.97761	3.67926	ADCY1
Vascular smooth muscle contraction	1/133	0.298187	0.387153	2.8868	3.49313	ADCY1
Systemic lupus erythematosus	1/135	0.301927	0.387153	2.84343	3.40521	CD40
Apelin signaling pathway	1/137	0.305647	0.387153	2.80133	3.32049	ADCY1
Estrogen signaling pathway	1/137	0.305647	0.387153	2.80133	3.32049	ADCY1
Measles	1/139	0.309347	0.387534	2.76045	3.23881	TLR7
Cell adhesion molecules	1/148	0.325762	0.403662	2.59027	2.90521	CD40
Phagosome	1/152	0.332934	0.408113	2.52114	2.77278	PLA2R1
Pathways of neurodegeneration	2/475	0.359711	0.433057	1.61456	1.65081	KIF5C;GRIA4
Hepatocellular carcinoma	1/168	0.360881	0.433057	2.27775	2.3215	SMARCC2
Influenza A	1/172	0.367686	0.436627	2.22402	2.22519	TLR7
Neutrophil extracellular trap formation	1/189	0.395824	0.465195	2.02117	1.8732	TLR7
Chemokine signaling pathway	1/192	0.40066	0.466074	1.98913	1.81934	ADCY1
Pathways in cancer	2/531	0.412692	0.473034	1.43949	1.27403	COL4A6;ADCY1
Focal adhesion	1/201	0.414942	0.473034	1.89875	1.67017	COL4A6
Rap1 signaling pathway	1/210	0.42889	0.482762	1.81616	1.53748	ADCY1
Human immunodeficiency virus 1 infection	1/212	0.431945	0.482762	1.79876	1.50998	TAPBP
Lipid and atherosclerosis	1/215	0.436497	0.483114	1.77327	1.47	CD40
Coronavirus disease	1/232	0.461626	0.506014	1.64136	1.26877	TLR7
Chemical carcinogenesis	1/239	0.471651	0.512078	1.59252	1.1968	ADCY1
Shigellosis	1/246	0.481492	0.512252	1.54647	1.13026	FNBP1
Salmonella infection	1/249	0.485655	0.512252	1.52753	1.10327	KIF5C
Parkinson disease	1/249	0.485655	0.512252	1.52753	1.10327	KIF5C
Endocytosis	1/252	0.489785	0.512252	1.50904	1.07714	KIF5C
Prion disease	1/273	0.517795	0.536624	1.39105	0.915554	KIF5C
Cytokine-cytokine receptor interaction	1/295	0.545521	0.560265	1.28552	0.779041	CD40
Human papillomavirus infection	1/331	0.587554	0.598046	1.14318	0.60793	COL4A6
PI3K-Akt signaling pathway	1/354	0.612385	0.617804	1.06744	0.523468	COL4A6
Alzheimer disease	1/369	0.627783	0.627783	1.02315	0.476338	KIF5C

## Sheet: GO Biolocical Processes
Term	Overlap	P-value	Adjusted p-value	Odds Ratio	Combined Score	Genes
RNA Transport (GO:0050658)	3/39	0.000150108	0.0798575	33.185	292.166	DDX39B;KIF5C;NUP62
mRNA Transport (GO:0051028)	3/58	0.000489126	0.0908949	21.7004	165.419	DDX39B;KIF5C;YTHDC1
Positive Regulation Of Phagocytosis (GO:0050766)	3/60	0.00054043	0.0908949	20.9368	157.511	CAMK1D;MYO18A;CD47
RNA Export From Nucleus (GO:0006405)	3/65	0.00068342	0.0908949	19.2435	140.255	DDX39B;YTHDC1;NUP62
Positive Regulation Of DNA-templated Transcription (GO:0045893)	10/1243	0.00139285	0.125532	3.52968	23.2126	KMT2E;CD40;SMARCC2;DDX39B;KMT2A;NUP62;RFX5;MICAL2;ETV5;BRD4
Positive Regulation Of Epithelial Cell Apoptotic Process (GO:1904037)	2/23	0.00168214	0.125532	37.2101	237.687	CD40;PLA2R1
Protein-Containing Complex Assembly (GO:0065003)	5/328	0.00173328	0.125532	6.32869	40.2361	CD40;TRAPPC2L;KMT2A;TBCD;TAPBP
Regulation Of G1/S Transition Of Mitotic Cell Cycle (GO:2000045)	3/106	0.00279644	0.125532	11.5596	67.9637	KMT2E;SMARCC2;PSME1
Adenylate Cyclase-Activating G Protein-Coupled Receptor Signaling Pathway (GO:0007189)	3/110	0.0031052	0.125532	11.1252	64.2446	PTGFR;ADGRF1;ADCY1
Vesicle Budding From Membrane (GO:0006900)	2/32	0.0032479	0.125532	26.0353	149.176	TRAPPC2L;MYO18A
Regulation Of I-kappaB kinase/NF-kappaB Signaling (GO:0043122)	4/232	0.00331083	0.125532	7.06015	40.3174	CD40;USP20;NUP62;BRD4
Regulation Of mRNA Processing (GO:0050684)	2/35	0.00387644	0.125532	23.6649	131.407	YTHDC1;METTL16
Protein-Containing Complex Organization (GO:0043933)	3/126	0.00454612	0.125532	9.67024	52.1563	CD40;KMT2A;TAPBP
Cellular Component Assembly (GO:0022607)	4/260	0.00496027	0.125532	6.27902	33.3183	PTPRD;CD40;KMT2A;TAPBP
Positive Regulation Of Stress Fiber Assembly (GO:0051496)	2/43	0.00580405	0.125532	19.0397	98.0392	CD47;SORBS3
Cellular Response To Ketone (GO:1901655)	2/44	0.00607017	0.125532	18.5854	94.8669	PTGFR;ADCY1
Cellular Response To Mechanical Stimulus (GO:0071260)	2/48	0.00718929	0.125532	16.9659	83.7295	CD40;TLR7
Nuclear Export (GO:0051168)	2/49	0.00748258	0.125532	16.6041	81.28	DDX39B;NUP62
Regulation Of Interleukin-12 Production (GO:0032655)	2/50	0.00778121	0.125532	16.2574	78.9464	CD40;CD47
Positive Regulation Of Actin Filament Bundle Assembly (GO:0032233)	2/51	0.00808516	0.125532	15.9248	76.7212	CD47;SORBS3
Cellular Response To Alcohol (GO:0097306)	2/53	0.00870889	0.125532	15.2987	72.5682	PTGFR;ADCY1
Adenylate Cyclase-Modulating G Protein-Coupled Receptor Signaling Pathway (GO:0007188)	3/163	0.00924043	0.125532	7.42012	34.7571	PTGFR;ADGRF1;ADCY1
Purine Ribonucleotide Biosynthetic Process (GO:0009152)	2/55	0.00935354	0.125532	14.7199	68.7716	AMPD3;ADCY1
Positive Regulation Of DNA-templated Transcription, Elongation (GO:0032786)	2/56	0.00968363	0.125532	14.4466	66.9936	DDX39B;BRD4
Regulation Of Cytokine Production (GO:0001817)	3/167	0.00986869	0.125532	7.23768	33.4264	BTN2A1;CD47;PLA2R1
Post-Transcriptional Regulation Of Gene Expression (GO:0010608)	2/57	0.0100189	0.125532	14.1832	65.2895	YTHDC1;METTL16
Regulation Of Phagocytosis (GO:0050764)	2/58	0.0103592	0.125532	13.9293	63.6551	CAMK1D;CD47
Positive Regulation Of I-kappaB kinase/NF-kappaB Signaling (GO:0043123)	3/175	0.0111986	0.125532	6.89826	30.9867	CD40;NUP62;BRD4
Spliceosomal Complex Assembly (GO:0000245)	2/62	0.0117712	0.125532	12.998	57.7386	DDX39B;YTHDC1
mRNA Export From Nucleus (GO:0006406)	2/62	0.0117712	0.125532	12.998	57.7386	DDX39B;YTHDC1
RNA Splicing, Via Transesterification Reactions With Bulged Adenosine As Nucleophile (GO:0000377)	3/180	0.0120799	0.125532	6.70169	29.5961	DDX39B;YTHDC1;PRPF3
Positive Regulation Of Mitotic Cell Cycle Phase Transition (GO:1901992)	2/63	0.0121367	0.125532	12.7843	56.3983	KMT2E;BRD4
Positive Regulation Of Mitotic Cytokinesis (GO:1903490)	1/5	0.0131812	0.125532	95.8798	415.061	NUP62
Transmembrane Receptor Protein Tyrosine Phosphatase Signaling Pathway (GO:0007185)	1/5	0.0131812	0.125532	95.8798	415.061	PTPRD
T-helper 2 Cell Differentiation (GO:0045064)	1/5	0.0131812	0.125532	95.8798	415.061	KMT2A
Regulation Of 3'-UTR-mediated mRNA Stabilization (GO:1905868)	1/5	0.0131812	0.125532	95.8798	415.061	METTL16
Response To cGMP (GO:0070305)	1/5	0.0131812	0.125532	95.8798	415.061	TLR7
snRNA Modification (GO:0040031)	1/5	0.0131812	0.125532	95.8798	415.061	METTL16
Defense Response To Virus (GO:0051607)	3/189	0.0137647	0.125532	6.37452	27.3189	CD40;USP20;TLR7
Positive Regulation Of Protein Transport (GO:0051222)	2/70	0.0148321	0.125532	11.4642	48.2755	MBD1;MYO18A
Synapse Assembly (GO:0007416)	2/71	0.0152363	0.125532	11.2975	47.2697	PTPRD;ADGRF1
Golgi Vesicle Transport (GO:0048193)	3/197	0.0153693	0.125532	6.10918	25.5081	TRAPPC2L;MYO18A;TAPBP
Positive Regulation Of Nucleic Acid-Templated Transcription (GO:1903508)	5/557	0.0157415	0.125532	3.65999	15.1943	KMT2E;SMARCC2;KMT2A;NUP62;BRD4
Positive Regulation Of Icosanoid Secretion (GO:0032305)	1/6	0.0157969	0.125532	76.7	318.147	PLA2R1
Positive Regulation Of Mitophagy (GO:1901526)	1/6	0.0157969	0.125532	76.7	318.147	VPS13D
Tubulin Complex Assembly (GO:0007021)	1/6	0.0157969	0.125532	76.7	318.147	TBCD
Positive Regulation Of Protein Localization To Centrosome (GO:1904781)	1/6	0.0157969	0.125532	76.7	318.147	NUP62
Negative Regulation Of Smooth Muscle Cell Apoptotic Process (GO:0034392)	1/6	0.0157969	0.125532	76.7	318.147	GRIA4
Anterograde Dendritic Transport (GO:0098937)	1/6	0.0157969	0.125532	76.7	318.147	KIF5C
Intraciliary Transport Involved In Cilium Assembly (GO:0035735)	1/6	0.0157969	0.125532	76.7	318.147	MBD1
Regulation Of Cell Cycle G1/S Phase Transition (GO:1902806)	2/74	0.0164774	0.125532	10.8252	44.4456	SMARCC2;PSME1
Regulation Of Stress Fiber Assembly (GO:0051492)	2/75	0.0169005	0.125532	10.6763	43.5639	CD47;SORBS3
Stress-Induced Premature Senescence (GO:0090400)	1/7	0.0184058	0.125532	63.9135	255.34	PLA2R1
IMP Biosynthetic Process (GO:0006188)	1/7	0.0184058	0.125532	63.9135	255.34	AMPD3
Translocation Of Molecules Into Host (GO:0044417)	1/7	0.0184058	0.125532	63.9135	255.34	DDX39B
Negative Regulation Of Phospholipase Activity (GO:0010519)	1/7	0.0184058	0.125532	63.9135	255.34	PLA2R1
TRIF-dependent Toll-Like Receptor Signaling Pathway (GO:0035666)	1/7	0.0184058	0.125532	63.9135	255.34	CD40
Viral mRNA Export From Host Cell Nucleus (GO:0046784)	1/7	0.0184058	0.125532	63.9135	255.34	DDX39B
Anterograde Axonal Protein Transport (GO:0099641)	1/7	0.0184058	0.125532	63.9135	255.34	KIF5C
Regulation Of Mitophagy (GO:1901524)	1/7	0.0184058	0.125532	63.9135	255.34	VPS13D
Axo-Dendritic Protein Transport (GO:0099640)	1/7	0.0184058	0.125532	63.9135	255.34	KIF5C
Regulation Of Phospholipase A2 Activity (GO:0032429)	1/7	0.0184058	0.125532	63.9135	255.34	PLA2R1
Protein Localization To Presynapse (GO:1905383)	1/7	0.0184058	0.125532	63.9135	255.34	KIF5C
Myeloid Leukocyte Mediated Immunity (GO:0002444)	1/7	0.0184058	0.125532	63.9135	255.34	KMT2E
mRNA Splicing, Via Spliceosome (GO:0000398)	3/211	0.0184224	0.125532	5.69394	22.7427	DDX39B;YTHDC1;PRPF3
Positive Regulation Of Cytoskeleton Organization (GO:0051495)	2/79	0.0186385	0.125532	10.1197	40.3019	NUP62;SORBS3
Positive Regulation Of Endocytosis (GO:0045807)	2/79	0.0186385	0.125532	10.1197	40.3019	CAMK1D;CD47
Response To Type II Interferon (GO:0034341)	2/80	0.0190844	0.125532	9.98944	39.5471	CD40;CD47
mRNA Processing (GO:0006397)	3/214	0.0191174	0.125532	5.61213	22.2081	DDX39B;YTHDC1;PRPF3
Cellular Response To Interleukin-1 (GO:0071347)	2/81	0.0195347	0.125532	9.8625	38.8145	CD40;CD47
Golgi Ribbon Formation (GO:0090161)	1/8	0.0210079	0.125532	54.7802	211.608	MYO18A
MyD88-independent Toll-Like Receptor Signaling Pathway (GO:0002756)	1/8	0.0210079	0.125532	54.7802	211.608	CD40
Transcription-Coupled Nucleotide-Excision Repair (GO:0006283)	1/8	0.0210079	0.125532	54.7802	211.608	UVSSA
Translational Readthrough (GO:0006451)	1/8	0.0210079	0.125532	54.7802	211.608	SECISBP2
RNA Secondary Structure Unwinding (GO:0010501)	1/8	0.0210079	0.125532	54.7802	211.608	DDX39B
Positive Regulation Of Opsonization (GO:1903028)	1/8	0.0210079	0.125532	54.7802	211.608	MYO18A
Positive Regulation Of Protein Kinase C Signaling (GO:0090037)	1/8	0.0210079	0.125532	54.7802	211.608	CD40
Presynaptic Membrane Assembly (GO:0097105)	1/8	0.0210079	0.125532	54.7802	211.608	PTPRD
Regulation Of Tumor Necrosis Factor Superfamily Cytokine Production (GO:1903555)	1/8	0.0210079	0.125532	54.7802	211.608	CD47
Regulation Of DNA Methylation (GO:0044030)	1/8	0.0210079	0.125532	54.7802	211.608	KMT2A
Collagen-Activated Signaling Pathway (GO:0038065)	1/8	0.0210079	0.125532	54.7802	211.608	COL4A6
Positive Regulation Of Centriole Replication (GO:0046601)	1/8	0.0210079	0.125532	54.7802	211.608	NUP62
Selenocysteine Incorporation (GO:0001514)	1/8	0.0210079	0.125532	54.7802	211.608	SECISBP2
mRNA Metabolic Process (GO:0016071)	2/85	0.0213805	0.125532	9.38531	36.0891	PRPF3;METTL16
Response To Interleukin-1 (GO:0070555)	2/85	0.0213805	0.125532	9.38531	36.0891	CD40;CD47
Regulation Of Mitotic Cell Cycle Phase Transition (GO:1901990)	2/86	0.0218529	0.125532	9.27311	35.455	SMARCC2;PSME1
Regulation Of Type II Interferon Production (GO:0032649)	2/87	0.0223296	0.125532	9.16355	34.8384	TLR7;CD47
I-kappaB Phosphorylation (GO:0007252)	1/9	0.0236033	0.125532	47.9303	179.565	TLR7
IMP Metabolic Process (GO:0046040)	1/9	0.0236033	0.125532	47.9303	179.565	AMPD3
Negative Regulation Of Muscle Cell Apoptotic Process (GO:0010656)	1/9	0.0236033	0.125532	47.9303	179.565	GRIA4
Adherens Junction Assembly (GO:0034333)	1/9	0.0236033	0.125532	47.9303	179.565	TBCD
Presynaptic Membrane Organization (GO:0097090)	1/9	0.0236033	0.125532	47.9303	179.565	PTPRD
Regulation Of Protein Localization To Centrosome (GO:1904779)	1/9	0.0236033	0.125532	47.9303	179.565	NUP62
Peptidyl-Lysine Dimethylation (GO:0018027)	1/9	0.0236033	0.125532	47.9303	179.565	SETBP1
Microtubule Anchoring (GO:0034453)	1/9	0.0236033	0.125532	47.9303	179.565	MBD1
Cellular Response To Prostaglandin Stimulus (GO:0071379)	1/9	0.0236033	0.125532	47.9303	179.565	PTGFR
Dosage Compensation (GO:0007549)	1/9	0.0236033	0.125532	47.9303	179.565	YTHDC1
Organelle Organization (GO:0006996)	4/418	0.0246427	0.125532	3.85152	14.2632	KIF5C;VPS13D;MYO18A;MICAL2
Inflammatory Response (GO:0006954)	3/236	0.0246567	0.125532	5.07657	18.797	PTGFR;CD40;ADCY1
Regulation Of Inflammatory Response (GO:0050727)	3/240	0.0257476	0.125532	4.98987	18.26	TLR7;CD47;BRD4
Regulation Of mRNA Splicing, Via Spliceosome (GO:0048024)	2/94	0.025786	0.125532	8.46334	30.9583	YTHDC1;METTL16
Synaptic Vesicle Transport (GO:0048489)	1/10	0.0261919	0.125532	42.6026	155.172	KIF5C
Actin Filament Depolymerization (GO:0030042)	1/10	0.0261919	0.125532	42.6026	155.172	MICAL2
Regulation Of Opsonization (GO:1903027)	1/10	0.0261919	0.125532	42.6026	155.172	MYO18A
Protein Deneddylation (GO:0000338)	1/10	0.0261919	0.125532	42.6026	155.172	COPS7A
Cell Proliferation In Forebrain (GO:0021846)	1/10	0.0261919	0.125532	42.6026	155.172	MBD1
Regulation Of Smooth Muscle Cell Apoptotic Process (GO:0034391)	1/10	0.0261919	0.125532	42.6026	155.172	GRIA4
Microtubule Anchoring At Centrosome (GO:0034454)	1/10	0.0261919	0.125532	42.6026	155.172	MBD1
rRNA Base Methylation (GO:0070475)	1/10	0.0261919	0.125532	42.6026	155.172	METTL16
Positive Regulation Of MHC Class II Biosynthetic Process (GO:0045348)	1/10	0.0261919	0.125532	42.6026	155.172	RFX5
Positive Regulation Of Autophagy Of Mitochondrion (GO:1903599)	1/10	0.0261919	0.125532	42.6026	155.172	VPS13D
Positive Regulation Of DNA-binding Transcription Factor Activity (GO:0051091)	3/246	0.0274322	0.128289	4.86519	17.4954	CD40;CAMK1D;ADCY1
RNA Splicing (GO:0008380)	2/98	0.0278525	0.128289	8.10907	29.0372	DDX39B;PRPF3
AMP Metabolic Process (GO:0046033)	1/11	0.0287737	0.128289	38.3404	136.043	AMPD3
Negative Regulation Of Microtubule Polymerization (GO:0031115)	1/11	0.0287737	0.128289	38.3404	136.043	TBCD
Presynapse Organization (GO:0099172)	1/11	0.0287737	0.128289	38.3404	136.043	PTPRD
Purine Ribonucleoside Monophosphate Biosynthetic Process (GO:0009168)	1/11	0.0287737	0.128289	38.3404	136.043	AMPD3
Purine Ribonucleoside Monophosphate Metabolic Process (GO:0009167)	1/11	0.0287737	0.128289	38.3404	136.043	AMPD3
Dosage Compensation By Inactivation Of X Chromosome (GO:0009048)	1/11	0.0287737	0.128289	38.3404	136.043	YTHDC1
Regulation Of RNA Splicing (GO:0043484)	2/102	0.0299836	0.128289	7.78314	27.2963	YTHDC1;METTL16
Positive Regulation Of Inflammatory Response (GO:0050729)	2/104	0.0310729	0.128289	7.62976	26.4861	TLR7;CD47
Synaptic Membrane Adhesion (GO:0099560)	1/12	0.0313489	0.128289	34.8531	120.682	PTPRD
Granulocyte Activation (GO:0036230)	1/12	0.0313489	0.128289	34.8531	120.682	KMT2E
acetyl-CoA Biosynthetic Process (GO:0006085)	1/12	0.0313489	0.128289	34.8531	120.682	ACSS1
Positive Regulation Of Sodium Ion Transmembrane Transporter Activity (GO:2000651)	1/12	0.0313489	0.128289	34.8531	120.682	FXYD2
Neutrophil Mediated Immunity (GO:0002446)	1/12	0.0313489	0.128289	34.8531	120.682	KMT2E
Microtubule Anchoring At Microtubule Organizing Center (GO:0072393)	1/12	0.0313489	0.128289	34.8531	120.682	MBD1
Positive Regulation Of Cell Morphogenesis Involved In Differentiation (GO:0010770)	1/12	0.0313489	0.128289	34.8531	120.682	PTPRD
Positive Regulation Of Cellular Extravasation (GO:0002693)	1/12	0.0313489	0.128289	34.8531	120.682	CD47
Sodium Ion Export Across Plasma Membrane (GO:0036376)	1/12	0.0313489	0.128289	34.8531	120.682	FXYD2
Positive Regulation Of T Cell Activation (GO:0050870)	2/107	0.032736	0.128886	7.41064	25.3391	SMARCC2;CD47
ATP Transport (GO:0015867)	1/13	0.0339173	0.128886	31.9471	108.104	CD47
Spliceosomal tri-snRNP Complex Assembly (GO:0000244)	1/13	0.0339173	0.128886	31.9471	108.104	PRPF3
Synaptic Vesicle Localization (GO:0097479)	1/13	0.0339173	0.128886	31.9471	108.104	KIF5C
Positive Regulation Of Potassium Ion Transmembrane Transporter Activity (GO:1901018)	1/13	0.0339173	0.128886	31.9471	108.104	FXYD2
acyl-CoA Biosynthetic Process (GO:0071616)	1/13	0.0339173	0.128886	31.9471	108.104	ACSS1
Immune Response-Regulating Cell Surface Receptor Signaling Pathway (GO:0002768)	1/13	0.0339173	0.128886	31.9471	108.104	CD40
Intracellular Potassium Ion Homeostasis (GO:0030007)	1/13	0.0339173	0.128886	31.9471	108.104	FXYD2
Embryonic Hemopoiesis (GO:0035162)	1/13	0.0339173	0.128886	31.9471	108.104	KMT2A
Endolysosomal Toll-Like Receptor Signaling Pathway (GO:0140894)	1/13	0.0339173	0.128886	31.9471	108.104	TLR7
Regulation Of Leukocyte Activation (GO:0002694)	1/14	0.0364791	0.131732	29.4882	97.6358	MYO18A
Positive Regulation Of Transporter Activity (GO:0032411)	1/14	0.0364791	0.131732	29.4882	97.6358	KMT2A
Regulation Of MHC Class II Biosynthetic Process (GO:0045346)	1/14	0.0364791	0.131732	29.4882	97.6358	RFX5
Regulation Of Interleukin-6 Production (GO:0032675)	2/114	0.0367492	0.131732	6.94503	22.9439	TLR7;CD47
Protein Modification By Small Protein Removal (GO:0070646)	2/114	0.0367492	0.131732	6.94503	22.9439	USP20;COPS7A
Positive Regulation Of Transcription By RNA Polymerase II (GO:0045944)	6/938	0.0369214	0.131732	2.60456	8.59234	CD40;KMT2A;RFX5;MICAL2;ETV5;BRD4
Cellular Response To Oxidative Stress (GO:0034599)	2/117	0.0385245	0.131732	6.76283	22.0229	PLA2R1;ETV5
DNA Alkylation (GO:0006305)	1/15	0.0390342	0.131732	27.3805	88.8036	KMT2E
Negative Regulation Of Immune Effector Process (GO:0002698)	1/15	0.0390342	0.131732	27.3805	88.8036	CD47
Negative Regulation Of Phagocytosis (GO:0050765)	1/15	0.0390342	0.131732	27.3805	88.8036	CD47
Presynapse Assembly (GO:0099054)	1/15	0.0390342	0.131732	27.3805	88.8036	PTPRD
mRNA Methylation (GO:0080009)	1/15	0.0390342	0.131732	27.3805	88.8036	METTL16
Peptidyl-Lysine Trimethylation (GO:0018023)	1/15	0.0390342	0.131732	27.3805	88.8036	KMT2A
Protein Localization To Microtubule Organizing Center (GO:1905508)	1/15	0.0390342	0.131732	27.3805	88.8036	MBD1
Positive Regulation Of DNA Damage Response, Signal Transduction By P53 Class Mediator (GO:0043517)	1/15	0.0390342	0.131732	27.3805	88.8036	PLA2R1
Defense Response To Protozoan (GO:0042832)	1/15	0.0390342	0.131732	27.3805	88.8036	CD40
Positive Regulation Of Endothelial Cell Apoptotic Process (GO:2000353)	1/15	0.0390342	0.131732	27.3805	88.8036	CD40
Positive Regulation Of Cell Projection Organization (GO:0031346)	2/118	0.0391234	0.131732	6.70419	21.7285	PTPRD;CAMK1D
acetyl-CoA Metabolic Process (GO:0006084)	1/16	0.0415827	0.137404	25.5538	81.263	ACSS1
Nuclear Migration (GO:0007097)	1/16	0.0415827	0.137404	25.5538	81.263	MBD1
Regulation Of Protein Kinase C Signaling (GO:0090036)	1/16	0.0415827	0.137404	25.5538	81.263	CD40
Positive Regulation Of Defense Response (GO:0031349)	2/124	0.0427915	0.139455	6.37255	20.0825	TLR7;CD47
Regulation Of Leukocyte Chemotaxis (GO:0002688)	1/17	0.0441245	0.139455	23.9555	74.759	CAMK1D
Protein Localization To Centrosome (GO:0071539)	1/17	0.0441245	0.139455	23.9555	74.759	MBD1
Positive Regulation Of Dendrite Morphogenesis (GO:0050775)	1/17	0.0441245	0.139455	23.9555	74.759	PTPRD
Establishment Of Vesicle Localization (GO:0051650)	1/18	0.0466598	0.139455	22.5452	69.0983	KIF5C
Negative Regulation Of Nervous System Development (GO:0051961)	1/18	0.0466598	0.139455	22.5452	69.0983	MBD1
Positive Regulation Of Neutrophil Chemotaxis (GO:0090023)	1/18	0.0466598	0.139455	22.5452	69.0983	CAMK1D
T-helper Cell Differentiation (GO:0042093)	1/18	0.0466598	0.139455	22.5452	69.0983	KMT2A
Antigen Processing And Presentation Of Peptide Antigen Via MHC Class I (GO:0002474)	1/18	0.0466598	0.139455	22.5452	69.0983	TAPBP
Intracellular Sodium Ion Homeostasis (GO:0006883)	1/18	0.0466598	0.139455	22.5452	69.0983	FXYD2
Neutrophil Activation (GO:0042119)	1/18	0.0466598	0.139455	22.5452	69.0983	KMT2E
Nucleosome Disassembly (GO:0006337)	1/18	0.0466598	0.139455	22.5452	69.0983	SMARCC2
Regulation Of Protein Neddylation (GO:2000434)	1/18	0.0466598	0.139455	22.5452	69.0983	COPS7A
Peptide Antigen Assembly With MHC Protein Complex (GO:0002501)	1/18	0.0466598	0.139455	22.5452	69.0983	TAPBP
Positive Regulation Of CREB Transcription Factor Activity (GO:0032793)	1/18	0.0466598	0.139455	22.5452	69.0983	CAMK1D
Regulation Of DNA Damage Checkpoint (GO:2000001)	1/18	0.0466598	0.139455	22.5452	69.0983	DDX39B
Response To Organophosphorus (GO:0046683)	1/18	0.0466598	0.139455	22.5452	69.0983	TLR7
Synapse Organization (GO:0050808)	2/131	0.047227	0.140362	6.02462	18.3919	PTPRD;ADGRF1
Regulation Of Centriole Replication (GO:0046599)	1/19	0.0491884	0.140689	21.2917	64.1326	NUP62
Establishment Of Epithelial Cell Polarity (GO:0090162)	1/19	0.0491884	0.140689	21.2917	64.1326	MYO18A
COPII Vesicle Coating (GO:0048208)	1/19	0.0491884	0.140689	21.2917	64.1326	TRAPPC2L
Regulation Of Granulocyte Chemotaxis (GO:0071622)	1/19	0.0491884	0.140689	21.2917	64.1326	CAMK1D
RNA Destabilization (GO:0050779)	1/19	0.0491884	0.140689	21.2917	64.1326	METTL16
Vesicle Targeting, Rough ER To cis-Golgi (GO:0048207)	1/19	0.0491884	0.140689	21.2917	64.1326	TRAPPC2L
Regulation Of Transcription Involved In G1/S Transition Of Mitotic Cell Cycle (GO:0000083)	1/19	0.0491884	0.140689	21.2917	64.1326	BRD4
Positive Regulation Of Intracellular Signal Transduction (GO:1902533)	4/525	0.0501123	0.142565	3.04375	9.11144	CD40;NUP62;TLR7;BRD4
DNA Methylation (GO:0006306)	1/20	0.0517104	0.144031	20.17	59.7456	KMT2E
Calcium-Mediated Signaling Using Intracellular Calcium Source (GO:0035584)	1/20	0.0517104	0.144031	20.17	59.7456	PTGFR
Regulation Of Spindle Organization (GO:0090224)	1/20	0.0517104	0.144031	20.17	59.7456	NUP62
protein-DNA Complex Disassembly (GO:0032986)	1/20	0.0517104	0.144031	20.17	59.7456	SMARCC2
Positive Regulation Of Cytokine Production (GO:0001819)	3/320	0.0528972	0.146569	3.71546	10.9212	CD40;TLR7;PLA2R1
Positive Regulation Of Granulocyte Chemotaxis (GO:0071624)	1/21	0.0542259	0.147939	19.1606	55.8454	CAMK1D
Positive Regulation Of Interferon-Alpha Production (GO:0032727)	1/21	0.0542259	0.147939	19.1606	55.8454	TLR7
Positive Regulation Of Signal Transduction By P53 Class Mediator (GO:1901798)	1/21	0.0542259	0.147939	19.1606	55.8454	PLA2R1
Protein Neddylation (GO:0045116)	1/22	0.0567348	0.152439	18.2473	52.3581	COPS7A
rRNA Methylation (GO:0031167)	1/22	0.0567348	0.152439	18.2473	52.3581	METTL16
Negative Regulation Of Cell Development (GO:0010721)	1/22	0.0567348	0.152439	18.2473	52.3581	MBD1
Defense Response To Symbiont (GO:0140546)	2/148	0.0586552	0.156391	5.31856	15.0839	CD40;TLR7
Positive Regulation Of Neutrophil Migration (GO:1902624)	1/23	0.0592372	0.156391	17.417	49.2239	CAMK1D
Potassium Ion Homeostasis (GO:0055075)	1/23	0.0592372	0.156391	17.417	49.2239	FXYD2
Neuron Development (GO:0048666)	2/150	0.0600574	0.156391	5.24616	14.7546	ADGRF1;TBCD
protein-RNA Complex Assembly (GO:0022618)	2/150	0.0600574	0.156391	5.24616	14.7546	DDX39B;YTHDC1
RNA Splicing, Via Transesterification Reactions (GO:0000375)	1/24	0.0617331	0.156391	16.6589	46.3938	PRPF3
Protein K48-linked Deubiquitination (GO:0071108)	1/24	0.0617331	0.156391	16.6589	46.3938	USP20
Regulation Of Proteolysis Involved In Protein Catabolic Process (GO:1903050)	1/24	0.0617331	0.156391	16.6589	46.3938	PSME1
Cell Morphogenesis Involved In Differentiation (GO:0000904)	1/24	0.0617331	0.156391	16.6589	46.3938	TBCD
Positive Regulation Of ERBB Signaling Pathway (GO:1901186)	1/24	0.0617331	0.156391	16.6589	46.3938	NUP62
Positive Regulation Of Cell Cycle G2/M Phase Transition (GO:1902751)	1/24	0.0617331	0.156391	16.6589	46.3938	BRD4
Response To Purine-Containing Compound (GO:0014074)	1/24	0.0617331	0.156391	16.6589	46.3938	TLR7
Positive Regulation Of Response To External Stimulus (GO:0032103)	2/155	0.0636134	0.158178	5.07343	13.977	TLR7;CD47
Regulation Of DNA-templated Transcription (GO:0006355)	9/1922	0.0640227	0.158178	1.92827	5.29987	KMT2E;KLF13;SMARCC2;SETBP1;KMT2A;NUP62;RFX5;ETV5;BRD4
Positive Regulation Of Peptidase Activity (GO:0010952)	1/25	0.0642225	0.158178	15.9639	43.8274	PSME1
Regulation Of Neutrophil Chemotaxis (GO:0090022)	1/25	0.0642225	0.158178	15.9639	43.8274	CAMK1D
Purine Ribonucleotide Catabolic Process (GO:0009154)	1/25	0.0642225	0.158178	15.9639	43.8274	AMPD3
Sodium Ion Homeostasis (GO:0055078)	1/25	0.0642225	0.158178	15.9639	43.8274	FXYD2
Positive Regulation Of Nuclear Division (GO:0051785)	1/26	0.0667054	0.160576	15.3246	41.4909	NUP62
Regulation Of Interferon-Alpha Production (GO:0032647)	1/26	0.0667054	0.160576	15.3246	41.4909	TLR7
Negative Regulation Of Protein Polymerization (GO:0032272)	1/26	0.0667054	0.160576	15.3246	41.4909	TBCD
Histone H3-K4 Methylation (GO:0051568)	1/26	0.0667054	0.160576	15.3246	41.4909	KMT2A
Regulation Of Nucleotide-Excision Repair (GO:2000819)	1/26	0.0667054	0.160576	15.3246	41.4909	SMARCC2
Establishment Of Protein Localization To Vacuole (GO:0072666)	1/27	0.0691818	0.163577	14.7345	39.356	VPS13D
Synaptic Transmission, Glutamatergic (GO:0035249)	1/27	0.0691818	0.163577	14.7345	39.356	GRIA4
Negative Regulation Of Neurogenesis (GO:0050768)	1/27	0.0691818	0.163577	14.7345	39.356	MBD1
mRNA Modification (GO:0016556)	1/27	0.0691818	0.163577	14.7345	39.356	METTL16
Vesicle Coating (GO:0006901)	1/28	0.0716518	0.165734	14.188	37.3988	TRAPPC2L
Protein Depolymerization (GO:0051261)	1/28	0.0716518	0.165734	14.188	37.3988	MICAL2
Protein Localization To Golgi Apparatus (GO:0034067)	1/28	0.0716518	0.165734	14.188	37.3988	VPS13D
Regulation Of Sodium Ion Transmembrane Transport (GO:1902305)	1/28	0.0716518	0.165734	14.188	37.3988	FXYD2
Regulation Of DNA Damage Response, Signal Transduction By P53 Class Mediator (GO:0043516)	1/28	0.0716518	0.165734	14.188	37.3988	PLA2R1
mRNA Splice Site Recognition (GO:0006376)	1/29	0.0741154	0.168502	13.6806	35.5988	YTHDC1
Regulation Of Protein Modification By Small Protein Conjugation Or Removal (GO:1903320)	1/29	0.0741154	0.168502	13.6806	35.5988	COPS7A
Positive Regulation Of B Cell Proliferation (GO:0030890)	1/29	0.0741154	0.168502	13.6806	35.5988	CD40
Positive Regulation Of Endopeptidase Activity (GO:0010950)	1/29	0.0741154	0.168502	13.6806	35.5988	PSME1
B Cell Proliferation (GO:0042100)	1/31	0.0790233	0.173006	12.7673	32.4036	CD40
Regulation Of Dendrite Morphogenesis (GO:0048814)	1/31	0.0790233	0.173006	12.7673	32.4036	PTPRD
Toll-Like Receptor Signaling Pathway (GO:0002224)	1/31	0.0790233	0.173006	12.7673	32.4036	TLR7
Negative Regulation Of Microtubule Polymerization Or Depolymerization (GO:0031111)	1/31	0.0790233	0.173006	12.7673	32.4036	TBCD
Positive Regulation Of Mononuclear Cell Migration (GO:0071677)	1/31	0.0790233	0.173006	12.7673	32.4036	CD47
Regulation Of Long-Term Synaptic Potentiation (GO:1900271)	1/31	0.0790233	0.173006	12.7673	32.4036	ADCY1
Regulation Of Macrophage Activation (GO:0043030)	1/31	0.0790233	0.173006	12.7673	32.4036	MYO18A
Non-Motile Cilium Assembly (GO:1905515)	1/31	0.0790233	0.173006	12.7673	32.4036	MBD1
Positive Regulation Of G1/S Transition Of Mitotic Cell Cycle (GO:1900087)	1/31	0.0790233	0.173006	12.7673	32.4036	KMT2E
Histone Lysine Methylation (GO:0034968)	1/32	0.0814677	0.176182	12.3548	30.9804	KMT2A
Regulation Of Metaphase/Anaphase Transition Of Cell Cycle (GO:1902099)	1/32	0.0814677	0.176182	12.3548	30.9804	SMARCC2
Positive Regulation Of Synapse Assembly (GO:0051965)	1/32	0.0814677	0.176182	12.3548	30.9804	PTPRD
Regulation Of Transcription By RNA Polymerase II (GO:0006357)	9/2028	0.0837112	0.17784	1.81629	4.5051	CD40;KLF13;SMARCC2;KMT2A;RFX5;MICAL2;ZNF337;ETV5;BRD4
Positive Regulation Of Interleukin-12 Production (GO:0032735)	1/33	0.0839057	0.17784	11.9681	29.6578	CD40
Protein K63-linked Deubiquitination (GO:0070536)	1/33	0.0839057	0.17784	11.9681	29.6578	USP20
Regulation Of G0 To G1 Transition (GO:0070316)	1/33	0.0839057	0.17784	11.9681	29.6578	SMARCC2
Positive Regulation Of Epidermal Growth Factor Receptor Signaling Pathway (GO:0045742)	1/33	0.0839057	0.17784	11.9681	29.6578	NUP62
RNA Processing (GO:0006396)	2/183	0.0847543	0.178926	4.28253	10.5693	DDX39B;PRPF3
Transcription Initiation-Coupled Chromatin Remodeling (GO:0045815)	1/34	0.0863374	0.180123	11.6049	28.4261	KMT2A
Positive Regulation Of Organelle Organization (GO:0010638)	1/34	0.0863374	0.180123	11.6049	28.4261	SORBS3
Protein Targeting To Vacuole (GO:0006623)	1/34	0.0863374	0.180123	11.6049	28.4261	VPS13D
Positive Regulation Of Mitotic Nuclear Division (GO:0045840)	1/35	0.0887627	0.182323	11.263	27.2766	NUP62
Glutamate Receptor Signaling Pathway (GO:0007215)	1/35	0.0887627	0.182323	11.263	27.2766	GRIA4
Adherens Junction Organization (GO:0034332)	1/35	0.0887627	0.182323	11.263	27.2766	TBCD
Regulation Of G2/M Transition Of Mitotic Cell Cycle (GO:0010389)	1/35	0.0887627	0.182323	11.263	27.2766	BRD4
Intracellular Monoatomic Cation Homeostasis (GO:0030003)	2/190	0.0903354	0.183745	4.12161	9.90928	CD40;FXYD2
COPII-coated Vesicle Budding (GO:0090114)	1/36	0.0911817	0.183745	10.9407	26.2018	TRAPPC2L
Positive Regulation Of Interferon-Beta Production (GO:0032728)	1/36	0.0911817	0.183745	10.9407	26.2018	TLR7
Regulation Of Intracellular Protein Transport (GO:0033157)	1/36	0.0911817	0.183745	10.9407	26.2018	MBD1
Regulation Of Trans-Synaptic Signaling (GO:0099177)	1/36	0.0911817	0.183745	10.9407	26.2018	GRIA4
Regulation Of Signal Transduction (GO:0009966)	2/193	0.0927603	0.185792	4.05626	9.64471	USP20;NUP62
Spliceosomal snRNP Assembly (GO:0000387)	1/37	0.0935944	0.185792	10.6362	25.1949	PRPF3
Positive Regulation Of Immune Effector Process (GO:0002699)	1/37	0.0935944	0.185792	10.6362	25.1949	MYO18A
Regulation Of Sodium Ion Transmembrane Transporter Activity (GO:2000649)	1/37	0.0935944	0.185792	10.6362	25.1949	FXYD2
Positive Regulation Of Myoblast Differentiation (GO:0045663)	1/38	0.0960008	0.186962	10.3482	24.25	SMARCC2
Heart Looping (GO:0001947)	1/38	0.0960008	0.186962	10.3482	24.25	MICAL2
Lymphocyte Proliferation (GO:0046651)	1/38	0.0960008	0.186962	10.3482	24.25	CD40
Membrane Assembly (GO:0071709)	1/38	0.0960008	0.186962	10.3482	24.25	PTPRD
Positive Regulation Of Intracellular Transport (GO:0032388)	1/39	0.098401	0.186962	10.0754	23.3619	MBD1
Positive Regulation Of Lymphocyte Differentiation (GO:0045621)	1/39	0.098401	0.186962	10.0754	23.3619	SMARCC2
Anterograde Axonal Transport (GO:0008089)	1/39	0.098401	0.186962	10.0754	23.3619	KIF5C
Regulation Of Mitotic Spindle Organization (GO:0060236)	1/39	0.098401	0.186962	10.0754	23.3619	NUP62
Regulation Of Nitric Oxide Biosynthetic Process (GO:0045428)	1/39	0.098401	0.186962	10.0754	23.3619	CD47
Nuclear Transport (GO:0051169)	1/39	0.098401	0.186962	10.0754	23.3619	NUP62
Positive Regulation Of ATP-dependent Activity (GO:0032781)	1/39	0.098401	0.186962	10.0754	23.3619	FXYD2
Negative Regulation Of Cell-Substrate Adhesion (GO:0010812)	1/39	0.098401	0.186962	10.0754	23.3619	TBCD
Regulation Of Microtubule Polymerization (GO:0031113)	1/40	0.100795	0.190152	9.81657	22.5258	TBCD
Positive Regulation Of Cell Cycle G1/S Phase Transition (GO:1902808)	1/40	0.100795	0.190152	9.81657	22.5258	KMT2E
Regulation Of Chemokine Production (GO:0032642)	1/41	0.103183	0.193286	9.57067	21.7374	TLR7
Regulation Of Dendrite Development (GO:0050773)	1/41	0.103183	0.193286	9.57067	21.7374	CAMK1D
Potassium Ion Import Across Plasma Membrane (GO:1990573)	1/42	0.105564	0.195	9.33677	20.9932	FXYD2
Negative Regulation Of I-kappaB kinase/NF-kappaB Signaling (GO:0043124)	1/42	0.105564	0.195	9.33677	20.9932	USP20
Determination Of Heart Left/Right Asymmetry (GO:0061371)	1/42	0.105564	0.195	9.33677	20.9932	MICAL2
Embryonic Heart Tube Morphogenesis (GO:0003143)	1/42	0.105564	0.195	9.33677	20.9932	MICAL2
Regulation Of Endothelial Cell Apoptotic Process (GO:2000351)	1/43	0.107939	0.195319	9.11401	20.2895	CD40
Regulation Of Primary Metabolic Process (GO:0080090)	1/43	0.107939	0.195319	9.11401	20.2895	ADGRF1
mRNA Catabolic Process (GO:0006402)	1/43	0.107939	0.195319	9.11401	20.2895	METTL16
mRNA Destabilization (GO:0061157)	1/43	0.107939	0.195319	9.11401	20.2895	METTL16
Regulation Of Cell-Cell Adhesion (GO:0022407)	1/43	0.107939	0.195319	9.11401	20.2895	CD47
Energy Derivation By Oxidation Of Organic Compounds (GO:0015980)	1/43	0.107939	0.195319	9.11401	20.2895	ADGRF1
Positive Regulation Of Leukocyte Cell-Cell Adhesion (GO:1903039)	1/44	0.110308	0.196926	8.90161	19.6234	CD47
Regulation Of B Cell Proliferation (GO:0030888)	1/44	0.110308	0.196926	8.90161	19.6234	CD40
Regulation Of DNA-templated Transcription Elongation (GO:0032784)	1/44	0.110308	0.196926	8.90161	19.6234	DDX39B
Regulation Of Cell-Substrate Adhesion (GO:0010810)	1/44	0.110308	0.196926	8.90161	19.6234	TBCD
Positive Regulation Of mRNA Catabolic Process (GO:0061014)	1/45	0.112671	0.19914	8.69886	18.9921	METTL16
I-kappaB kinase/NF-kappaB Signaling (GO:0007249)	1/45	0.112671	0.19914	8.69886	18.9921	TLR7
Mitotic Nuclear Division (GO:0140014)	1/45	0.112671	0.19914	8.69886	18.9921	NUP62
Regulation Of Epidermal Growth Factor Receptor Signaling Pathway (GO:0042058)	1/46	0.115028	0.199332	8.50513	18.393	NUP62
Vacuolar Transport (GO:0007034)	1/46	0.115028	0.199332	8.50513	18.393	VPS13D
Regulation Of Interleukin-10 Production (GO:0032653)	1/46	0.115028	0.199332	8.50513	18.393	CD47
Antiviral Innate Immune Response (GO:0140374)	1/46	0.115028	0.199332	8.50513	18.393	USP20
Positive Regulation Of Blood Vessel Endothelial Cell Migration (GO:0043536)	1/46	0.115028	0.199332	8.50513	18.393	CD40
Positive Regulation Of Cell-Cell Adhesion (GO:0022409)	1/46	0.115028	0.199332	8.50513	18.393	CD47
Positive Regulation Of Lymphocyte Activation (GO:0051251)	1/47	0.117378	0.201437	8.31982	17.824	CD47
Bicellular Tight Junction Assembly (GO:0070830)	1/47	0.117378	0.201437	8.31982	17.824	TBCD
Regulation Of T Cell Differentiation (GO:0045580)	1/47	0.117378	0.201437	8.31982	17.824	SMARCC2
Cytoplasmic Microtubule Organization (GO:0031122)	1/48	0.119723	0.203563	8.14239	17.2828	MBD1
Retrograde Vesicle-Mediated Transport, Golgi To Endoplasmic Reticulum (GO:0006890)	1/48	0.119723	0.203563	8.14239	17.2828	TAPBP
Erythrocyte Differentiation (GO:0030218)	1/49	0.122061	0.203563	7.97236	16.7677	KMT2E
Positive Regulation Of Nervous System Development (GO:0051962)	1/49	0.122061	0.203563	7.97236	16.7677	PTPRD
Heterophilic Cell-Cell Adhesion Via Plasma Membrane Cell Adhesion Molecules (GO:0007157)	1/49	0.122061	0.203563	7.97236	16.7677	PTPRD
Regulation Of Mitotic Metaphase/Anaphase Transition (GO:0030071)	1/49	0.122061	0.203563	7.97236	16.7677	SMARCC2
Proton Transmembrane Transport (GO:1902600)	1/49	0.122061	0.203563	7.97236	16.7677	FXYD2
Negative Regulation Of DNA Metabolic Process (GO:0051053)	1/49	0.122061	0.203563	7.97236	16.7677	KMT2A
Regulation Of Cell Communication (GO:0010646)	1/49	0.122061	0.203563	7.97236	16.7677	NUP62
Regulation Of Interferon-Beta Production (GO:0032648)	1/50	0.124393	0.204883	7.80926	16.2769	TLR7
Positive Regulation Of Transport (GO:0051050)	1/50	0.124393	0.204883	7.80926	16.2769	KMT2A
Nucleocytoplasmic Transport (GO:0006913)	1/50	0.124393	0.204883	7.80926	16.2769	NUP62
Mitotic Metaphase Plate Congression (GO:0007080)	1/50	0.124393	0.204883	7.80926	16.2769	NUP62
Metaphase Plate Congression (GO:0051310)	1/51	0.12672	0.20743	7.65269	15.8088	NUP62
Regulation Of Synapse Assembly (GO:0051963)	1/51	0.12672	0.20743	7.65269	15.8088	PTPRD
Positive Regulation Of B Cell Activation (GO:0050871)	1/52	0.12904	0.210483	7.50226	15.3619	CD40
Tight Junction Assembly (GO:0120192)	1/53	0.131354	0.210483	7.35762	14.9349	TBCD
Actin Polymerization Or Depolymerization (GO:0008154)	1/53	0.131354	0.210483	7.35762	14.9349	MICAL2
Regulation Of Proteasomal Protein Catabolic Process (GO:0061136)	1/53	0.131354	0.210483	7.35762	14.9349	PSME1
Positive Regulation Of NIK/NF-kappaB Signaling (GO:1901224)	1/53	0.131354	0.210483	7.35762	14.9349	TLR7
Regulation Of Alternative mRNA Splicing, Via Spliceosome (GO:0000381)	1/53	0.131354	0.210483	7.35762	14.9349	YTHDC1
Positive Regulation Of Chemokine Production (GO:0032722)	1/53	0.131354	0.210483	7.35762	14.9349	TLR7
Regulation Of Lipid Metabolic Process (GO:0019216)	1/54	0.133662	0.211631	7.21843	14.5267	ADGRF1
Apical Junction Assembly (GO:0043297)	1/54	0.133662	0.211631	7.21843	14.5267	TBCD
Regulation Of Myoblast Differentiation (GO:0045661)	1/54	0.133662	0.211631	7.21843	14.5267	SMARCC2
Regulation Of Blood Vessel Endothelial Cell Migration (GO:0043535)	1/54	0.133662	0.211631	7.21843	14.5267	CD40
Positive Regulation Of Tyrosine Phosphorylation Of STAT Protein (GO:0042531)	1/55	0.135964	0.214637	7.0844	14.136	CD40
Regulation Of Mitotic Nuclear Division (GO:0007088)	1/56	0.13826	0.216336	6.95524	13.7618	NUP62
Nucleotide-Excision Repair (GO:0006289)	1/56	0.13826	0.216336	6.95524	13.7618	UVSSA
Pattern Recognition Receptor Signaling Pathway (GO:0002221)	1/56	0.13826	0.216336	6.95524	13.7618	TLR7
RNA Catabolic Process (GO:0006401)	1/57	0.14055	0.218633	6.8307	13.4032	METTL16
Myeloid Cell Differentiation (GO:0030099)	1/57	0.14055	0.218633	6.8307	13.4032	KMT2E
Positive Regulation Of Type II Interferon Production (GO:0032729)	1/58	0.142834	0.221538	6.71053	13.0592	TLR7
Response To Light Stimulus (GO:0009416)	1/60	0.147384	0.227931	6.4824	12.4119	UVSSA
Positive Regulation Of Interleukin-8 Production (GO:0032757)	1/61	0.14965	0.229435	6.37404	12.1072	TLR7
Positive Regulation Of Organelle Assembly (GO:1902117)	1/61	0.14965	0.229435	6.37404	12.1072	NUP62
Positive Regulation Of Cell Junction Assembly (GO:1901890)	1/61	0.14965	0.229435	6.37404	12.1072	PTPRD
RNA Methylation (GO:0001510)	1/62	0.151911	0.231566	6.26923	11.8141	METTL16
Regulation Of T Cell Activation (GO:0050863)	1/62	0.151911	0.231566	6.26923	11.8141	CD47
G1/S Transition Of Mitotic Cell Cycle (GO:0000082)	1/63	0.154165	0.234331	6.1678	11.5321	BRD4
Positive Regulation Of Macroautophagy (GO:0016239)	1/64	0.156414	0.235062	6.0696	11.2606	VPS13D
Positive Regulation Of Type I Interferon Production (GO:0032481)	1/64	0.156414	0.235062	6.0696	11.2606	TLR7
Positive Regulation Of T Cell Differentiation (GO:0045582)	1/64	0.156414	0.235062	6.0696	11.2606	SMARCC2
Negative Regulation Of Cell Death (GO:0060548)	1/64	0.156414	0.235062	6.0696	11.2606	NUP62
Regulation Of Tyrosine Phosphorylation Of STAT Protein (GO:0042509)	1/65	0.158656	0.237761	5.97446	10.9991	CD40
Cellular Response To Type II Interferon (GO:0071346)	1/66	0.160893	0.240436	5.88225	10.747	CD47
Regulation Of Neurogenesis (GO:0050767)	1/67	0.163124	0.243087	5.79283	10.5038	MBD1
Regulation Of Endopeptidase Activity (GO:0052548)	1/69	0.167569	0.247629	5.62189	10.0427	PSME1
Regulation Of Monoatomic Ion Transmembrane Transporter Activity (GO:0032412)	1/69	0.167569	0.247629	5.62189	10.0427	FXYD2
Cellular Response To Calcium Ion (GO:0071277)	1/69	0.167569	0.247629	5.62189	10.0427	ADCY1
Sulfur Compound Biosynthetic Process (GO:0044272)	1/70	0.169782	0.248827	5.54013	9.82398	METTL16
Regulation Of G Protein-Coupled Receptor Signaling Pathway (GO:0008277)	1/70	0.169782	0.248827	5.54013	9.82398	USP20
Regulation Of Cellular Biosynthetic Process (GO:0031326)	1/70	0.169782	0.248827	5.54013	9.82398	CD47
Negative Regulation Of Supramolecular Fiber Organization (GO:1902904)	1/71	0.17199	0.250681	5.46071	9.6126	TBCD
Cell-Cell Junction Assembly (GO:0007043)	1/71	0.17199	0.250681	5.46071	9.6126	TBCD
Negative Regulation Of Cell Adhesion (GO:0007162)	1/72	0.174192	0.253197	5.38353	9.40824	TBCD
Positive Regulation Of Secretion By Cell (GO:1903532)	1/73	0.176388	0.255691	5.30849	9.21059	MYO18A
Regulation Of Gene Expression (GO:0010468)	5/1127	0.177207	0.256076	1.74772	3.02431	SETBP1;YTHDC1;BTN2A1;METTL16;TAPBP
Positive Regulation Of Lymphocyte Proliferation (GO:0050671)	1/74	0.178579	0.256076	5.23551	9.01934	CD40
Regulation Of mRNA Stability (GO:0043488)	1/74	0.178579	0.256076	5.23551	9.01934	METTL16
Import Into Nucleus (GO:0051170)	1/74	0.178579	0.256076	5.23551	9.01934	NUP62
Positive Regulation Of Neurogenesis (GO:0050769)	1/75	0.180764	0.257819	5.1645	8.83421	PTPRD
Nucleosome Organization (GO:0034728)	1/75	0.180764	0.257819	5.1645	8.83421	SMARCC2
Positive Regulation Of Interleukin-6 Production (GO:0032755)	1/76	0.182943	0.258483	5.09538	8.65492	TLR7
Positive Regulation Of Protein Secretion (GO:0050714)	1/76	0.182943	0.258483	5.09538	8.65492	MYO18A
Regulation Of Ras Protein Signal Transduction (GO:0046578)	1/76	0.182943	0.258483	5.09538	8.65492	NUP62
Gene Expression (GO:0010467)	2/296	0.184915	0.258483	2.62145	4.42464	DDX39B;YTHDC1
Actomyosin Structure Organization (GO:0031032)	1/77	0.185116	0.258483	5.02809	8.48123	MYO18A
Negative Regulation Of Transforming Growth Factor Beta Receptor Signaling Pathway (GO:0030512)	1/77	0.185116	0.258483	5.02809	8.48123	ADAMTSL2
Cell Morphogenesis Involved In Neuron Differentiation (GO:0048667)	1/77	0.185116	0.258483	5.02809	8.48123	TBCD
Embryonic Organ Development (GO:0048568)	1/77	0.185116	0.258483	5.02809	8.48123	KMT2A
Protein Import Into Nucleus (GO:0006606)	1/79	0.189446	0.263836	4.89867	8.14967	NUP62
Regulation Of Interleukin-8 Production (GO:0032677)	1/81	0.193754	0.26913	4.77572	7.83776	TLR7
Sodium Ion Transmembrane Transport (GO:0035725)	1/82	0.195899	0.271402	4.71652	7.68867	FXYD2
Cellular Response To Cytokine Stimulus (GO:0071345)	2/308	0.19642	0.271417	2.51711	4.09659	CD40;CD47
Epigenetic Regulation Of Gene Expression (GO:0040029)	1/83	0.198039	0.272239	4.65877	7.54392	KMT2A
Regulation Of NIK/NF-kappaB Signaling (GO:1901222)	1/83	0.198039	0.272239	4.65877	7.54392	TLR7
Purine Ribonucleotide Metabolic Process (GO:0009150)	1/84	0.200173	0.273158	4.60241	7.40332	AMPD3
Positive Regulation Of Double-Strand Break Repair (GO:2000781)	1/84	0.200173	0.273158	4.60241	7.40332	SMARCC2
Establishment Of Protein Localization To Organelle (GO:0072594)	1/85	0.202301	0.273158	4.54739	7.26672	NUP62
Positive Regulation Of Protein Localization (GO:1903829)	1/85	0.202301	0.273158	4.54739	7.26672	NUP62
Integrin-Mediated Signaling Pathway (GO:0007229)	1/85	0.202301	0.273158	4.54739	7.26672	CD47
Calcium-Mediated Signaling (GO:0019722)	1/85	0.202301	0.273158	4.54739	7.26672	PTGFR
Positive Regulation Of Endothelial Cell Migration (GO:0010595)	1/85	0.202301	0.273158	4.54739	7.26672	CD40
Exocytosis (GO:0006887)	1/86	0.204424	0.275326	4.49367	7.13396	SCRN1
Positive Regulation Of Cellular Process (GO:0048522)	3/594	0.208128	0.278903	1.96508	3.08439	PTGFR;SMARCC2;CD47
Regulation Of Double-Strand Break Repair (GO:2000779)	1/88	0.208653	0.278903	4.38992	6.87936	SMARCC2
Positive Regulation Of Cell Adhesion (GO:0045785)	1/88	0.208653	0.278903	4.38992	6.87936	CD47
Cellular Response To Chemical Stress (GO:0062197)	1/89	0.21076	0.28031	4.33982	6.75726	ETV5
Positive Regulation Of DNA Repair (GO:0045739)	1/89	0.21076	0.28031	4.33982	6.75726	SMARCC2
Positive Regulation Of MAP Kinase Activity (GO:0043406)	1/91	0.214956	0.285178	4.24295	6.52278	CD40
B Cell Activation (GO:0042113)	1/92	0.217046	0.286522	4.19611	6.41018	CD40
Positive Regulation Of Neuron Projection Development (GO:0010976)	1/92	0.217046	0.286522	4.19611	6.41018	CAMK1D
Vesicle Organization (GO:0016050)	1/94	0.221209	0.291295	4.10546	6.19369	TRAPPC2L
T Cell Receptor Signaling Pathway (GO:0050852)	1/95	0.223283	0.292577	4.06158	6.0896	BTN2A1
Cell Junction Assembly (GO:0034329)	1/95	0.223283	0.292577	4.06158	6.0896	ADGRF1
Regulation Of Defense Response (GO:0031347)	1/97	0.227413	0.297258	3.97656	5.88923	BRD4
Response To UV (GO:0009411)	1/100	0.233569	0.304556	3.85548	5.60693	UVSSA
Hemopoiesis (GO:0030097)	1/101	0.235611	0.306466	3.81673	5.51737	KMT2A
Calcium Ion Homeostasis (GO:0055074)	1/102	0.237646	0.30761	3.77875	5.42996	CD40
Regulation Of Protein Secretion (GO:0050708)	1/102	0.237646	0.30761	3.77875	5.42996	MYO18A
Inorganic Cation Import Across Plasma Membrane (GO:0098659)	1/103	0.239677	0.309486	3.74152	5.34462	FXYD2
Positive Regulation Of Vasculature Development (GO:1904018)	1/104	0.241702	0.311345	3.705	5.26128	CD40
Response To Calcium Ion (GO:0051592)	1/106	0.245737	0.315778	3.63407	5.10039	ADCY1
Negative Regulation Of Translation (GO:0017148)	1/107	0.247746	0.31683	3.5996	5.0227	METTL16
Positive Regulation Of Autophagy (GO:0010508)	1/107	0.247746	0.31683	3.5996	5.0227	USP20
Positive Regulation Of Metabolic Process (GO:0009893)	1/108	0.249751	0.317864	3.56578	4.94678	CAMK1D
Response To Tumor Necrosis Factor (GO:0034612)	1/108	0.249751	0.317864	3.56578	4.94678	CD40
Protein Modification By Small Protein Conjugation (GO:0032446)	2/364	0.251063	0.318125	2.12166	2.93224	UVSSA;COPS7A
Extracellular Structure Organization (GO:0043062)	1/109	0.25175	0.318125	3.53259	4.87257	COL4A6
Cellular Response To Salt (GO:1902075)	1/109	0.25175	0.318125	3.53259	4.87257	ADCY1
External Encapsulating Structure Organization (GO:0045229)	1/110	0.253743	0.318617	3.5	4.80001	COL4A6
RNA Metabolic Process (GO:0016070)	1/111	0.255732	0.318617	3.46801	4.72906	DDX39B
Negative Regulation Of Transmembrane Receptor Protein Serine/Threonine Kinase Signaling Pathway (GO:0090101)	1/111	0.255732	0.318617	3.46801	4.72906	ADAMTSL2
Regulation Of Transforming Growth Factor Beta Receptor Signaling Pathway (GO:0017015)	1/111	0.255732	0.318617	3.46801	4.72906	ADAMTSL2
Mitotic Sister Chromatid Segregation (GO:0000070)	1/111	0.255732	0.318617	3.46801	4.72906	NUP62
Cytoskeleton Organization (GO:0007010)	1/111	0.255732	0.318617	3.46801	4.72906	MICAL2
Protein Deubiquitination (GO:0016579)	1/112	0.257715	0.320338	3.43659	4.65967	USP20
Regulation Of Cytoskeleton Organization (GO:0051493)	1/114	0.261666	0.323736	3.37543	4.52538	SORBS3
Regulation Of MAP Kinase Activity (GO:0043405)	1/114	0.261666	0.323736	3.37543	4.52538	CD40
Endoplasmic Reticulum To Golgi Vesicle-Mediated Transport (GO:0006888)	1/115	0.263634	0.325414	3.34565	4.4604	TRAPPC2L
Positive Regulation Of Protein Serine/Threonine Kinase Activity (GO:0071902)	1/117	0.267554	0.32904	3.28763	4.33452	CD40
Negative Regulation Of Programmed Cell Death (GO:0043069)	2/381	0.267809	0.32904	2.02473	2.66755	NUP62;MYO18A
Regulation Of Small GTPase Mediated Signal Transduction (GO:0051056)	1/118	0.269507	0.329603	3.25937	4.27356	NUP62
Positive Regulation Of Cell Cycle Process (GO:0090068)	1/118	0.269507	0.329603	3.25937	4.27356	NUP62
Cellular Response To Tumor Necrosis Factor (GO:0071356)	1/119	0.271454	0.330466	3.23158	4.21387	CD40
Positive Regulation Of Angiogenesis (GO:0045766)	1/119	0.271454	0.330466	3.23158	4.21387	CD40
Positive Regulation Of Macromolecule Biosynthetic Process (GO:0010557)	1/122	0.277265	0.335239	3.15099	4.04202	RFX5
Regulation Of Protein Catabolic Process (GO:0042176)	1/122	0.277265	0.335239	3.15099	4.04202	PSME1
Protein Localization To Nucleus (GO:0034504)	1/122	0.277265	0.335239	3.15099	4.04202	NUP62
Modulation Of Chemical Synaptic Transmission (GO:0050804)	1/123	0.279192	0.336803	3.125	3.98705	GRIA4
Neuron Projection Guidance (GO:0097485)	1/124	0.281114	0.336831	3.09944	3.93317	KIF5C
Protein Dephosphorylation (GO:0006470)	1/124	0.281114	0.336831	3.09944	3.93317	PTPRD
Enzyme-Linked Receptor Protein Signaling Pathway (GO:0007167)	1/124	0.281114	0.336831	3.09944	3.93317	PTPRD
Response To Cytokine (GO:0034097)	1/125	0.283031	0.338365	3.07429	3.88036	CD40
Positive Regulation Of Intracellular Protein Transport (GO:0090316)	1/126	0.284943	0.339887	3.04954	3.82859	MBD1
Regulation Of Response To External Stimulus (GO:0032101)	1/127	0.28685	0.340634	3.02518	3.77784	BRD4
Regulation Of Tumor Necrosis Factor Production (GO:0032680)	1/127	0.28685	0.340634	3.02518	3.77784	CD47
Protein Targeting (GO:0006605)	1/129	0.290649	0.343558	2.97761	3.67926	VPS13D
Regulation Of DNA Repair (GO:0006282)	1/129	0.290649	0.343558	2.97761	3.67926	SMARCC2
Golgi Organization (GO:0007030)	1/130	0.292541	0.343558	2.95438	3.63138	MYO18A
Positive Regulation Of Peptidyl-Tyrosine Phosphorylation (GO:0050731)	1/130	0.292541	0.343558	2.95438	3.63138	CD40
Regulation Of Cell Cycle Process (GO:0010564)	1/130	0.292541	0.343558	2.95438	3.63138	SMARCC2
Plasma Membrane Bounded Cell Projection Organization (GO:0120036)	1/132	0.29631	0.346455	2.90898	3.53834	ADGRF1
Circulatory System Development (GO:0072359)	1/132	0.29631	0.346455	2.90898	3.53834	MICAL2
Vesicle-Mediated Transport (GO:0016192)	2/411	0.297358	0.346917	1.87334	2.27202	NECAP2;SCRN1
Antigen Receptor-Mediated Signaling Pathway (GO:0050851)	1/134	0.300059	0.349303	2.86495	3.44876	BTN2A1
Non-Membrane-Bounded Organelle Assembly (GO:0140694)	1/135	0.301927	0.349946	2.84343	3.40521	NUP62
Cellular Response To Metal Ion (GO:0071248)	1/135	0.301927	0.349946	2.84343	3.40521	ADCY1
Potassium Ion Transmembrane Transport (GO:0071805)	1/137	0.305647	0.353487	2.80133	3.32049	FXYD2
Intracellular Calcium Ion Homeostasis (GO:0006874)	1/139	0.309347	0.356991	2.76045	3.23881	CD40
Nervous System Development (GO:0007399)	2/433	0.318941	0.367265	1.77572	2.0292	ADGRF1;ADAM23
Positive Regulation Of Cellular Catabolic Process (GO:0031331)	1/146	0.322148	0.370157	2.62626	2.97488	USP20
Dephosphorylation (GO:0016311)	1/147	0.323957	0.371434	2.60814	2.93975	PTPRD
Axon Guidance (GO:0007411)	1/149	0.327562	0.374759	2.57264	2.87126	KIF5C
Regulation Of Cell Population Proliferation (GO:0042127)	3/766	0.331538	0.378463	1.50857	1.66548	PTGFR;NUP62;CD47
Cellular Response To Organic Cyclic Compound (GO:0071407)	1/152	0.332934	0.378463	2.52114	2.77278	ADCY1
Positive Regulation Of NF-kappaB Transcription Factor Activity (GO:0051092)	1/152	0.332934	0.378463	2.52114	2.77278	CD40
Peptidyl-Serine Phosphorylation (GO:0018105)	1/158	0.343552	0.3897	2.42406	2.5899	CAMK1D
Regulation Of Macromolecule Metabolic Process (GO:0060255)	1/162	0.350538	0.395937	2.36335	2.47747	TAPBP
Mitochondrion Organization (GO:0007005)	1/162	0.350538	0.395937	2.36335	2.47747	VPS13D
Peptidyl-Serine Modification (GO:0018209)	1/166	0.357451	0.40289	2.30559	2.37189	CAMK1D
Positive Regulation Of Gene Expression (GO:0010628)	2/480	0.364514	0.409224	1.59726	1.61194	KMT2A;PLA2R1
Heart Development (GO:0007507)	1/171	0.365991	0.409224	2.23722	2.24873	MICAL2
Negative Regulation Of Apoptotic Process (GO:0043066)	2/482	0.366431	0.409224	1.59044	1.59671	NUP62;MYO18A
Positive Regulation Of Cell Population Proliferation (GO:0008284)	2/483	0.367389	0.409224	1.58705	1.58917	PTGFR;CD47
Generation Of Neurons (GO:0048699)	1/172	0.367686	0.409224	2.22402	2.22519	PTPRD
Cell-Cell Adhesion Via Plasma-Membrane Adhesion Molecules (GO:0098742)	1/172	0.367686	0.409224	2.22402	2.22519	PTPRD
Neuron Differentiation (GO:0030182)	1/173	0.369376	0.410247	2.21098	2.202	PTPRD
Regulation Of Neuron Projection Development (GO:0010975)	1/174	0.371062	0.41126	2.19809	2.17915	CAMK1D
Positive Regulation Of Hydrolase Activity (GO:0051345)	1/176	0.37442	0.41326	2.17275	2.13446	CD40
Extracellular Matrix Organization (GO:0030198)	1/176	0.37442	0.41326	2.17275	2.13446	COL4A6
Protein Phosphorylation (GO:0006468)	2/500	0.383592	0.422507	1.53154	1.46748	CAMK1D;TLR7
Phosphate-Containing Compound Metabolic Process (GO:0006796)	1/184	0.387678	0.426125	2.07692	1.96805	PTPRD
Axonogenesis (GO:0007409)	1/188	0.394203	0.432404	2.03209	1.89165	KIF5C
Endocytosis (GO:0006897)	1/189	0.395824	0.433288	2.02117	1.8732	NECAP2
Transcription By RNA Polymerase II (GO:0006366)	1/192	0.40066	0.436785	1.98913	1.81934	KLF13
Neuron Projection Development (GO:0031175)	1/192	0.40066	0.436785	1.98913	1.81934	ADGRF1
Regulation Of Cell Differentiation (GO:0045595)	1/193	0.402264	0.437636	1.97867	1.80187	SMARCC2
Regulation Of Programmed Cell Death (GO:0043067)	1/195	0.405458	0.440212	1.95807	1.76762	NUP62
Endomembrane System Organization (GO:0010256)	1/196	0.407049	0.441039	1.94793	1.75084	MYO18A
DNA-templated Transcription (GO:0006351)	1/199	0.411797	0.445277	1.91812	1.70181	KLF13
Regulation Of Angiogenesis (GO:0045765)	1/205	0.421182	0.454501	1.86114	1.60931	CD40
Regulation Of GTPase Activity (GO:0043087)	1/214	0.434984	0.468444	1.78169	1.48316	CD40
Positive Regulation Of Protein Modification Process (GO:0031401)	1/225	0.451415	0.485157	1.69325	1.34676	CD40
Cellular Response To Lipid (GO:0071396)	1/228	0.455814	0.486934	1.67062	1.31256	ADCY1
Chromatin Remodeling (GO:0006338)	1/228	0.455814	0.486934	1.67062	1.31256	SMARCC2
Cilium Organization (GO:0044782)	1/228	0.455814	0.486934	1.67062	1.31256	MBD1
Negative Regulation Of Intracellular Signal Transduction (GO:1902532)	1/231	0.460179	0.489631	1.64858	1.27953	USP20
Positive Regulation Of Phosphorylation (GO:0042327)	1/231	0.460179	0.489631	1.64858	1.27953	CD40
Positive Regulation Of Developmental Process (GO:0051094)	1/233	0.46307	0.491723	1.6342	1.25813	SMARCC2
Positive Regulation Of GTPase Activity (GO:0043547)	1/234	0.464509	0.492269	1.6271	1.24762	CD40
Regulation Of Autophagy (GO:0010506)	1/241	0.474481	0.501837	1.57909	1.17726	USP20
Cilium Assembly (GO:0060271)	1/243	0.477297	0.503813	1.56588	1.15815	MBD1
Regulation Of Protein Phosphorylation (GO:0001932)	1/265	0.507307	0.534431	1.43378	0.973022	CD40
Negative Regulation Of Signal Transduction (GO:0009968)	1/267	0.50995	0.536153	1.42286	0.958215	CD47
Chromatin Organization (GO:0006325)	1/268	0.511266	0.536477	1.41746	0.950923	SMARCC2
Negative Regulation Of DNA-templated Transcription (GO:0045892)	3/1025	0.515167	0.539505	1.11106	0.736925	SMARCC2;ZNF337;ETV5
Chemical Synaptic Transmission (GO:0007268)	1/273	0.517795	0.541193	1.39105	0.915554	GRIA4
Plasma Membrane Bounded Cell Projection Assembly (GO:0120031)	1/275	0.520383	0.542831	1.38076	0.901896	MBD1
Monoatomic Cation Transmembrane Transport (GO:0098655)	1/281	0.528064	0.549416	1.35076	0.862507	FXYD2
Central Nervous System Development (GO:0007417)	1/283	0.530598	0.549416	1.34104	0.849885	ADAM23
Positive Regulation Of Cell Differentiation (GO:0045597)	1/283	0.530598	0.549416	1.34104	0.849885	SMARCC2
Transmembrane Receptor Protein Tyrosine Kinase Signaling Pathway (GO:0007169)	1/284	0.53186	0.549416	1.33623	0.843665	COL4A6
Inorganic Cation Transmembrane Transport (GO:0098662)	1/284	0.53186	0.549416	1.33623	0.843665	FXYD2
Regulation Of Apoptotic Process (GO:0042981)	2/705	0.561979	0.579405	1.07349	0.618644	NUP62;MYO18A
Positive Regulation Of MAPK Cascade (GO:0043410)	1/310	0.563522	0.579872	1.22218	0.70098	CD40
Supramolecular Fiber Organization (GO:0097435)	1/316	0.570525	0.585945	1.19853	0.672615	MBD1
Organelle Assembly (GO:0070925)	1/322	0.577418	0.591881	1.17577	0.645722	MBD1
Intracellular Protein Transport (GO:0006886)	1/325	0.580823	0.594227	1.16471	0.632796	NUP62
Proteolysis (GO:0006508)	1/330	0.586439	0.598821	1.14671	0.611986	ADAM23
Negative Regulation Of Gene Expression (GO:0010629)	1/336	0.593081	0.604443	1.12583	0.588162	METTL16
Negative Regulation Of Transcription By RNA Polymerase II (GO:0000122)	2/763	0.605578	0.615999	0.988689	0.495898	ZNF337;ETV5
Positive Regulation Of Protein Phosphorylation (GO:0001934)	1/377	0.635748	0.645454	1.00097	0.453393	CD40
Negative Regulation Of Cell Population Proliferation (GO:0008285)	1/379	0.637713	0.646216	0.995574	0.447875	NUP62
Positive Regulation Of Multicellular Organismal Process (GO:0051240)	1/387	0.64547	0.652833	0.974542	0.426632	PLA2R1
Cellular Response To Oxygen-Containing Compound (GO:1901701)	1/406	0.663244	0.669537	0.92792	0.381015	ADCY1
Protein Ubiquitination (GO:0016567)	1/434	0.687856	0.693067	0.866673	0.324288	UVSSA
Regulation Of Nucleic Acid-Templated Transcription (GO:1903506)	1/452	0.702736	0.706722	0.831315	0.293266	SETBP1
Negative Regulation Of Nucleic Acid-Templated Transcription (GO:1903507)	1/456	0.705947	0.708611	0.823838	0.286872	SMARCC2
Negative Regulation Of Cellular Process (GO:0048523)	1/537	0.764113	0.765552	0.696434	0.187368	NUP62
Protein Modification Process (GO:0036211)	1/711	0.853538	0.853538	0.521046	0.0825152	PTPRD

## Sheet: GO Cellular Compartments
Term	Overlap	P-value	Adjusted P-value	Odds Ratio	Combined Score	Genes
Nuclear Membrane (GO:0031965)	3/227	0.0222964	0.208948	5.28295	20.0928	SCRN1;MBD1;NUP62
bBAF Complex (GO:0140092)	1/9	0.0236033	0.208948	47.9303	179.565	SMARCC2
Sodium:Potassium-Exchanging ATPase Complex (GO:0005890)	1/9	0.0236033	0.208948	47.9303	179.565	FXYD2
CD40 Receptor Complex (GO:0035631)	1/10	0.0261919	0.208948	42.6026	155.172	CD40
Early Phagosome (GO:0032009)	1/11	0.0287737	0.208948	38.3404	136.043	TLR7
TRAPPII Protein Complex (GO:1990071)	1/11	0.0287737	0.208948	38.3404	136.043	TRAPPC2L
TRAPPIII Protein Complex (GO:1990072)	1/11	0.0287737	0.208948	38.3404	136.043	TRAPPC2L
Phagocytic Vesicle (GO:0045335)	2/100	0.0289101	0.208948	7.94278	28.1457	TLR7;TAPBP
Clathrin Vesicle Coat (GO:0030125)	1/12	0.0313489	0.208948	34.8531	120.682	NECAP2
npBAF Complex (GO:0071564)	1/12	0.0313489	0.208948	34.8531	120.682	SMARCC2
Polymeric Cytoskeletal Fiber (GO:0099513)	3/265	0.033148	0.208948	4.50802	15.3578	KIF5C;TBCD;MICAL2
Brahma Complex (GO:0035060)	1/13	0.0339173	0.208948	31.9471	108.104	SMARCC2
nBAF Complex (GO:0071565)	1/14	0.0364791	0.208948	29.4882	97.6358	SMARCC2
RSC-type Complex (GO:0016586)	1/14	0.0364791	0.208948	29.4882	97.6358	SMARCC2
Axonal Growth Cone (GO:0044295)	1/15	0.0390342	0.208948	27.3805	88.8036	KIF5C
Cation-Transporting ATPase Complex (GO:0090533)	1/15	0.0390342	0.208948	27.3805	88.8036	FXYD2
Myosin Filament (GO:0032982)	1/15	0.0390342	0.208948	27.3805	88.8036	MYO18A
Clathrin Coat (GO:0030118)	1/16	0.0415827	0.210224	25.5538	81.263	NECAP2
AMPA Glutamate Receptor Complex (GO:0032281)	1/19	0.0491884	0.223807	21.2917	64.1326	GRIA4
Endolysosome Membrane (GO:0036020)	1/19	0.0491884	0.223807	21.2917	64.1326	TLR7
Endocytic Vesicle Membrane (GO:0030666)	2/159	0.0665087	0.242669	4.94317	13.3981	TAPBP;GRIA4
Lumenal Side Of Endoplasmic Reticulum Membrane (GO:0098553)	1/27	0.0691818	0.242669	14.7345	39.356	TAPBP
Endolysosome (GO:0036019)	1/28	0.0716518	0.242669	14.188	37.3988	TLR7
SWI/SNF Complex (GO:0016514)	1/29	0.0741154	0.242669	13.6806	35.5988	SMARCC2
MLL1 Complex (GO:0071339)	1/30	0.0765726	0.242669	13.2082	33.9387	KMT2A
Non-Motile Cilium (GO:0097730)	1/30	0.0765726	0.242669	13.2082	33.9387	MBD1
Golgi Stack (GO:0005795)	1/31	0.0790233	0.242669	12.7673	32.4036	MARCHF4
MLL1/2 Complex (GO:0044665)	1/31	0.0790233	0.242669	12.7673	32.4036	KMT2A
Ionotropic Glutamate Receptor Complex (GO:0008328)	1/33	0.0839057	0.242669	11.9681	29.6578	GRIA4
Postsynaptic Density Membrane (GO:0098839)	1/34	0.0863374	0.242669	11.6049	28.4261	GRIA4
Microtubule (GO:0005874)	2/185	0.0863377	0.242669	4.23529	10.3743	KIF5C;TBCD
U4/U6 X U5 tri-snRNP Complex (GO:0046540)	1/35	0.0887627	0.242669	11.263	27.2766	PRPF3
Spliceosomal tri-snRNP Complex (GO:0097526)	1/36	0.0911817	0.242669	10.9407	26.2018	PRPF3
Supramolecular Fiber (GO:0099512)	1/36	0.0911817	0.242669	10.9407	26.2018	MYO18A
Vesicle Coat (GO:0030120)	1/37	0.0935944	0.242669	10.6362	25.1949	NECAP2
Postsynaptic Specialization Membrane (GO:0099634)	1/38	0.0960008	0.242669	10.3482	24.25	GRIA4
Euchromatin (GO:0000791)	1/44	0.110308	0.268398	8.90161	19.6234	KMT2E
Phagocytic Vesicle Membrane (GO:0030670)	1/45	0.112671	0.268398	8.69886	18.9921	TAPBP
Basement Membrane (GO:0005604)	1/46	0.115028	0.268398	8.50513	18.393	COL4A6
U2-type Precatalytic Spliceosome (GO:0071005)	1/49	0.122061	0.277689	7.97236	16.7677	PRPF3
Endoplasmic reticulum-Golgi Intermediate Compartment Membrane (GO:0033116)	1/52	0.12904	0.279586	7.50226	15.3619	TAPBP
Precatalytic Spliceosome (GO:0071011)	1/52	0.12904	0.279586	7.50226	15.3619	PRPF3
trans-Golgi Network (GO:0005802)	2/241	0.13387	0.283305	3.23374	6.50268	MYO18A;MARCHF4
Spliceosomal snRNP Complex (GO:0097525)	1/57	0.14055	0.284223	6.8307	13.4032	DDX39B
Extracellular Membrane-Bounded Organelle (GO:0065010)	1/57	0.14055	0.284223	6.8307	13.4032	GRIA4
Condensed Chromosome (GO:0000793)	1/60	0.147384	0.285361	6.4824	12.4119	BRD4
Extracellular Vesicle (GO:1903561)	1/60	0.147384	0.285361	6.4824	12.4119	GRIA4
Secretory Granule Membrane (GO:0030667)	2/279	0.168806	0.31703	2.78474	4.95407	CD47;CYB561
Actin Filament (GO:0005884)	1/71	0.17199	0.31703	5.46071	9.6126	MICAL2
Tertiary Granule Membrane (GO:0070821)	1/72	0.174192	0.31703	5.38353	9.40824	CD47
Glutamatergic Synapse (GO:0098978)	1/78	0.187284	0.334174	4.96254	8.31288	PTPRD
Bicellular Tight Junction (GO:0005923)	1/81	0.193754	0.339069	4.77572	7.83776	TBCD
Specific Granule Membrane (GO:0035579)	1/90	0.21286	0.352187	4.29084	6.63844	CD47
Clathrin-Coated Vesicle Membrane (GO:0030665)	1/90	0.21286	0.352187	4.29084	6.63844	NECAP2
U2-type Spliceosomal Complex (GO:0005684)	1/90	0.21286	0.352187	4.29084	6.63844	PRPF3
Tight Junction (GO:0070160)	1/93	0.21913	0.356086	4.15029	6.30052	TBCD
Nuclear Chromosome (GO:0000228)	1/95	0.223283	0.356469	4.06158	6.0896	BRD4
Microtubule Cytoskeleton (GO:0015630)	2/342	0.229461	0.360017	2.26148	3.32894	KIF5C;TBCD
Lysosomal Membrane (GO:0005765)	2/356	0.243195	0.372701	2.17049	3.06883	TLR7;CYB561
Apical Junction Complex (GO:0043296)	1/106	0.245737	0.372701	3.63407	5.10039	TBCD
Cytoplasmic Vesicle Lumen (GO:0060205)	1/115	0.263634	0.39329	3.34565	4.4604	AMPD3
Cytoplasmic Vesicle Membrane (GO:0030659)	2/389	0.275694	0.403278	1.98206	2.55382	TLR7;GRIA4
Ficolin-1-Rich Granule Lumen (GO:1904813)	1/123	0.279192	0.403278	3.125	3.98705	AMPD3
Nucleus (GO:0005634)	14/4487	0.29051	0.413069	1.24184	1.53506	KMT2E;CAMK1D;TRAPPC2L;KMT2A;YTHDC1;MICAL2;COPS7A;ETV5;SCRN1;DDX39B;PRPF3;RFX5;METTL16;BRD4
Golgi Membrane (GO:0000139)	2/427	0.313066	0.436649	1.80134	2.09197	TLR7;TAPBP
Mitotic Spindle (GO:0072686)	1/143	0.316691	0.436649	2.68215	3.08402	NUP62
Postsynaptic Density (GO:0014069)	1/151	0.331148	0.449768	2.53808	2.80506	GRIA4
Specific Granule (GO:0042581)	1/159	0.345305	0.460205	2.40859	2.56112	CD47
Tertiary Granule (GO:0070820)	1/162	0.350538	0.460205	2.36335	2.47747	CD47
Chromosome (GO:0005694)	1/164	0.354004	0.460205	2.33412	2.42386	UVSSA
Bounding Membrane Of Organelle (GO:0098588)	3/819	0.370303	0.474613	1.40669	1.39746	TLR7;TAPBP;GRIA4
Lysosome (GO:0005764)	2/503	0.386434	0.48192	1.52213	1.44723	TLR7;CYB561
Ficolin-1-Rich Granule (GO:0101002)	1/184	0.387678	0.48192	2.07692	1.96805	AMPD3
Intracellular Membrane-Bounded Organelle (GO:0043231)	15/5175	0.393468	0.48192	1.1312	1.05513	KMT2E;CAMK1D;TRAPPC2L;KMT2A;FNBP1;YTHDC1;MICAL2;COPS7A;ETV5;SCRN1;DDX39B;PRPF3;RFX5;METTL16;BRD4
Intracellular Organelle Lumen (GO:0070013)	3/856	0.397187	0.48192	1.34307	1.24012	COL4A6;AMPD3;ACSS1
Endocytic Vesicle (GO:0030139)	1/196	0.407049	0.487388	1.94793	1.75084	GRIA4
Spindle (GO:0005819)	1/210	0.42889	0.50687	1.81616	1.53748	NUP62
Lytic Vacuole (GO:0000323)	1/223	0.448463	0.523207	1.70868	1.37024	TLR7
Vesicle (GO:0031982)	1/235	0.465945	0.536722	1.62007	1.23723	GRIA4
Cilium (GO:0005929)	1/257	0.496595	0.564877	1.47919	1.0354	MBD1
Endoplasmic Reticulum Lumen (GO:0005788)	1/284	0.53186	0.594413	1.33623	0.843665	COL4A6
Lytic Vacuole Membrane (GO:0098852)	1/287	0.535625	0.594413	1.32201	0.825361	CYB561
Secretory Granule Lumen (GO:0034774)	1/316	0.570525	0.625516	1.19853	0.672615	AMPD3
Actin Cytoskeleton (GO:0015629)	1/327	0.583079	0.631669	1.15744	0.624364	MICAL2
Mitochondrial Matrix (GO:0005759)	1/355	0.613431	0.653931	1.06437	0.520147	ACSS1
Endosome Membrane (GO:0010008)	1/361	0.619647	0.653931	1.04631	0.500771	TLR7
Collagen-Containing Extracellular Matrix (GO:0062023)	1/373	0.631787	0.653931	1.01194	0.464687	COL4A6
Endoplasmic Reticulum Membrane (GO:0005789)	2/801	0.632373	0.653931	0.939802	0.430688	TLR7;TAPBP
Focal Adhesion (GO:0005925)	1/387	0.64547	0.659975	0.974542	0.426632	SORBS3
Cell-Substrate Junction (GO:0030055)	1/395	0.653063	0.66032	0.954364	0.406636	SORBS3
Intracellular Non-Membrane-Bounded Organelle (GO:0043232)	1/1195	0.96198	0.96198	0.302039	0.0117075	UVSSA

## Sheet: GO Molecular Function
Term	Overlap	P-value	Adjusted p-value	Odds Ratio	Combined Score	Genes
Histone H3 Methyltransferase Activity (GO:0140938)	3/36	0.000117935	0.0122652	36.2073	327.509	KMT2E;KMT2A;SETBP1
Histone H3K4 Methyltransferase Activity (GO:0042800)	2/13	0.000527475	0.0274287	71.0731	536.418	KMT2A;SETBP1
Lysine-Acetylated Histone Binding (GO:0070577)	2/23	0.00168214	0.0437355	37.2101	237.687	KMT2A;BRD4
Acetylation-Dependent Protein Binding (GO:0140033)	2/23	0.00168214	0.0437355	37.2101	237.687	KMT2A;BRD4
RNA Polymerase II Complex Binding (GO:0000993)	2/31	0.00305006	0.0634413	26.9344	156.02	UVSSA;BRD4
Protein-Lysine N-methyltransferase Activity (GO:0016279)	2/54	0.00902862	0.156496	15.0038	70.6281	SETBP1;KMT2A
Minor Groove Of Adenine-Thymine-Rich DNA Binding (GO:0003680)	1/6	0.0157969	0.15894	76.7	318.147	KMT2A
Unmethylated CpG Binding (GO:0045322)	1/7	0.0184058	0.15894	63.9135	255.34	KMT2A
S-methyltransferase Activity (GO:0008172)	1/7	0.0184058	0.15894	63.9135	255.34	KMT2A
Histone Reader Activity (GO:0140566)	1/8	0.0210079	0.15894	54.7802	211.608	BRD4
Prostaglandin Receptor Activity (GO:0004955)	1/9	0.0236033	0.15894	47.9303	179.565	PTGFR
Protein Binding Involved In Heterotypic Cell-Cell Adhesion (GO:0086080)	1/9	0.0236033	0.15894	47.9303	179.565	CD47
siRNA Binding (GO:0035197)	1/9	0.0236033	0.15894	47.9303	179.565	TLR7
Vinculin Binding (GO:0017166)	1/10	0.0261919	0.15894	42.6026	155.172	SORBS3
Ligand-Gated Monoatomic Ion Channel Activity Involved In Regulation Of Presynaptic Membrane Potential (GO:0099507)	1/10	0.0261919	0.15894	42.6026	155.172	GRIA4
N6-methyladenosine-containing RNA Binding (GO:1990247)	1/10	0.0261919	0.15894	42.6026	155.172	YTHDC1
mRNA Methyltransferase Activity (GO:0008174)	1/11	0.0287737	0.15894	38.3404	136.043	METTL16
Metalloendopeptidase Activity (GO:0004222)	2/101	0.0294449	0.15894	7.86215	27.7159	ADAMTSL2;ADAM23
Acid-Thiol Ligase Activity (GO:0016878)	1/12	0.0313489	0.15894	34.8531	120.682	ACSS1
CoA-ligase Activity (GO:0016405)	1/12	0.0313489	0.15894	34.8531	120.682	ACSS1
MHC Class I Protein Binding (GO:0042288)	1/13	0.0339173	0.15894	31.9471	108.104	TAPBP
U6 snRNA Binding (GO:0017070)	1/13	0.0339173	0.15894	31.9471	108.104	METTL16
Endopeptidase Activator Activity (GO:0061133)	1/14	0.0364791	0.15894	29.4882	97.6358	PSME1
Glutamate Receptor Activity (GO:0008066)	1/16	0.0415827	0.15894	25.5538	81.263	GRIA4
Transmembrane Receptor Protein Phosphatase Activity (GO:0019198)	1/16	0.0415827	0.15894	25.5538	81.263	PTPRD
Transmembrane Receptor Protein Tyrosine Phosphatase Activity (GO:0005001)	1/16	0.0415827	0.15894	25.5538	81.263	PTPRD
Ionotropic Glutamate Receptor Activity (GO:0004970)	1/16	0.0415827	0.15894	25.5538	81.263	GRIA4
Metallopeptidase Activity (GO:0008237)	2/124	0.0427915	0.15894	6.37255	20.0825	ADAMTSL2;ADAM23
Histone Methyltransferase Activity (GO:0042054)	1/19	0.0491884	0.176019	21.2917	64.1326	KMT2E
RNA Stem-Loop Binding (GO:0035613)	1/20	0.0517104	0.176019	20.17	59.7456	METTL16
Neurotransmitter Receptor Activity Involved In Regulation Of Postsynaptic Membrane Potential (GO:0099529)	1/21	0.0542259	0.176019	19.1606	55.8454	GRIA4
Endopeptidase Activity (GO:0004175)	3/335	0.0590826	0.176019	3.54488	10.0278	USP20;ADAMTSL2;ADAM23
Calmodulin-Dependent Protein Kinase Activity (GO:0004683)	1/23	0.0592372	0.176019	17.417	49.2239	CAMK1D
Ligand-Gated Monoatomic Ion Channel Activity (GO:0015276)	1/23	0.0592372	0.176019	17.417	49.2239	GRIA4
Mitogen-Activated Protein Kinase Binding (GO:0051019)	1/23	0.0592372	0.176019	17.417	49.2239	MICAL2
Peptidase Activator Activity (GO:0016504)	1/24	0.0617331	0.17834	16.6589	46.3938	PSME1
FAD Binding (GO:0071949)	1/25	0.0642225	0.180517	15.9639	43.8274	MICAL2
Oxidoreductase Activity, Acting On Paired Donors, With Incorporation Or Reduction Of Molecular Oxygen, NAD(P)H As One Donor, And Incorporation Of One Atom Of Oxygen (GO:0016709)	1/27	0.0691818	0.183247	14.7345	39.356	MICAL2
ADP Binding (GO:0043531)	1/27	0.0691818	0.183247	14.7345	39.356	MYO18A
Cell Adhesion Mediator Activity (GO:0098631)	1/28	0.0716518	0.183247	14.188	37.3988	CD47
RNA Binding (GO:0003723)	7/1411	0.0775325	0.183247	2.0098	5.13918	DDX39B;YTHDC1;SECISBP2;PRPF3;MYO18A;TLR7;METTL16
SH2 Domain Binding (GO:0042169)	1/31	0.0790233	0.183247	12.7673	32.4036	NUP62
Beta-Tubulin Binding (GO:0048487)	1/32	0.0814677	0.183247	12.3548	30.9804	TBCD
DNA Secondary Structure Binding (GO:0000217)	1/33	0.0839057	0.183247	11.9681	29.6578	KMT2A
RNA Polymerase Core Enzyme Binding (GO:0043175)	1/33	0.0839057	0.183247	11.9681	29.6578	UVSSA
Transmitter-Gated Monoatomic Ion Channel Activity Involved In Regulation Of Postsynaptic Membrane Potential (GO:1904315)	1/34	0.0863374	0.183247	11.6049	28.4261	GRIA4
MHC Protein Binding (GO:0042287)	1/34	0.0863374	0.183247	11.6049	28.4261	TAPBP
Sodium Channel Regulator Activity (GO:0017080)	1/34	0.0863374	0.183247	11.6049	28.4261	FXYD2
Nucleosomal DNA Binding (GO:0031492)	1/34	0.0863374	0.183247	11.6049	28.4261	SMARCC2
Inorganic Cation Transmembrane Transporter Activity (GO:0022890)	1/35	0.0887627	0.184626	11.263	27.2766	GRIA4
Basal RNA Polymerase II Transcription Machinery Binding (GO:0001099)	1/36	0.0911817	0.185939	10.9407	26.2018	UVSSA
Transmitter-Gated Monoatomic Ion Channel Activity (GO:0022824)	1/40	0.100795	0.196942	9.81657	22.5258	GRIA4
Regulatory RNA Binding (GO:0061980)	1/42	0.105564	0.196942	9.33677	20.9932	TLR7
Endopeptidase Regulator Activity (GO:0061135)	1/42	0.105564	0.196942	9.33677	20.9932	PSME1
Cell-Cell Adhesion Mediator Activity (GO:0098632)	1/43	0.107939	0.196942	9.11401	20.2895	CD47
Single-Stranded RNA Binding (GO:0003727)	1/43	0.107939	0.196942	9.11401	20.2895	TLR7
snRNA Binding (GO:0017069)	1/43	0.107939	0.196942	9.11401	20.2895	DDX39B
Signaling Receptor Complex Adaptor Activity (GO:0030159)	1/44	0.110308	0.197794	8.90161	19.6234	NUP62
Transcription Regulatory Region Nucleic Acid Binding (GO:0001067)	2/224	0.118858	0.207264	3.48437	7.4211	ETV5;BRD4
Sequence-Specific Double-Stranded DNA Binding (GO:1990837)	4/715	0.120668	0.207264	2.20856	4.67047	KLF13;RFX5;ETV5;BRD4
Sequence-Specific DNA Binding (GO:0043565)	4/717	0.121569	0.207264	2.20214	4.64051	KLF13;KMT2A;RFX5;ETV5
S-adenosylmethionine-dependent Methyltransferase Activity (GO:0008757)	1/50	0.124393	0.20866	7.80926	16.2769	KMT2A
Transcription Cis-Regulatory Region Binding (GO:0000976)	3/474	0.13064	0.21566	2.48102	5.04964	RFX5;ETV5;BRD4
Flavin Adenine Dinucleotide Binding (GO:0050660)	1/55	0.135964	0.220941	7.0844	14.136	MICAL2
Nucleosome Binding (GO:0031491)	1/62	0.151911	0.243057	6.26923	11.8141	SMARCC2
Double-Stranded RNA Binding (GO:0003725)	1/65	0.158656	0.250004	5.97446	10.9991	TLR7
Methylation-Dependent Protein Binding (GO:0140034)	1/68	0.165349	0.256662	5.70608	10.2692	KMT2E
mRNA Binding (GO:0003729)	2/282	0.17163	0.259231	2.75448	4.85453	YTHDC1;SECISBP2
Methylated Histone Binding (GO:0035064)	1/71	0.17199	0.259231	5.46071	9.6126	KMT2E
Protein Tyrosine Phosphatase Activity (GO:0004725)	1/76	0.182943	0.271801	5.09538	8.65492	PTPRD
Amyloid-Beta Binding (GO:0001540)	1/79	0.189446	0.27676	4.89867	8.14967	GRIA4
Ubiquitin Binding (GO:0043130)	1/80	0.191603	0.27676	4.83642	7.99136	NUP62
Chromatin DNA Binding (GO:0031490)	1/83	0.198039	0.282137	4.65877	7.54392	SMARCC2
Tubulin Binding (GO:0015631)	2/322	0.209958	0.295076	2.40527	3.75426	KIF5C;TBCD
mRNA 3'-UTR Binding (GO:0003730)	1/93	0.21913	0.30386	4.15029	6.30052	SECISBP2
Protein Serine/Threonine Kinase Activity (GO:0004674)	2/342	0.229461	0.309934	2.26148	3.32894	CAMK1D;BRD4
Cysteine-Type Deubiquitinase Activity (GO:0004843)	1/98	0.229471	0.309934	3.93537	5.79278	USP20
DNA-binding Transcription Activator Activity, RNA Polymerase II-specific (GO:0001228)	2/348	0.235341	0.313788	2.22158	3.21401	RFX5;ETV5
Cysteine-Type Endopeptidase Activity (GO:0004197)	1/106	0.245737	0.321572	3.63407	5.10039	USP20
Double-Stranded DNA Binding (GO:0003690)	3/650	0.247363	0.321572	1.7898	2.50016	KLF13;RFX5;ETV5
Deubiquitinase Activity (GO:0101005)	1/113	0.259693	0.333433	3.40573	4.5918	USP20
G Protein-Coupled Receptor Binding (GO:0001664)	1/140	0.31119	0.394681	2.74045	3.19907	USP20
Cysteine-Type Peptidase Activity (GO:0008234)	1/144	0.318514	0.399102	2.66326	3.047	USP20
Actin Binding (GO:0003779)	1/183	0.386036	0.477107	2.08844	1.98783	MICAL2
DNA Binding (GO:0003677)	3/846	0.389943	0.477107	1.35972	1.28052	SECISBP2;RFX5;ETV5
RNA Polymerase II Transcription Regulatory Region Sequence-Specific DNA Binding (GO:0000977)	4/1225	0.409501	0.49521	1.25197	1.11778	KLF13;ZNF419;RFX5;ETV5
GTPase Activator Activity (GO:0005096)	1/211	0.43042	0.514525	1.80742	1.52364	TBCD
Microtubule Binding (GO:0008017)	1/239	0.471651	0.551543	1.59252	1.1968	KIF5C
Ubiquitin-Like Protein Transferase Activity (GO:0019787)	1/240	0.473068	0.551543	1.58577	1.18698	MARCHF4
DNA-binding Transcription Repressor Activity, RNA Polymerase II-specific (GO:0001227)	1/243	0.477297	0.551543	1.56588	1.15815	ZNF337
G Protein-Coupled Receptor Activity (GO:0004930)	1/250	0.487035	0.556612	1.52132	1.09446	ADGRF1
Ubiquitin Protein Ligase Binding (GO:0031625)	1/271	0.515194	0.582393	1.4015	0.929488	CD40
ATP Binding (GO:0005524)	1/279	0.525517	0.587675	1.36061	0.875379	MYO18A
Ubiquitin-Like Protein Ligase Binding (GO:0044389)	1/289	0.538119	0.595365	1.3127	0.813449	CD40
Adenyl Ribonucleotide Binding (GO:0032559)	1/309	0.562344	0.609353	1.22621	0.705857	MYO18A
Cis-Regulatory Region Sequence-Specific DNA Binding (GO:0000987)	3/1098	0.56248	0.609353	1.03299	0.594381	KLF13;ZNF419;RFX5
RNA Polymerase II Cis-Regulatory Region Sequence-Specific DNA Binding (GO:0000978)	3/1122	0.577445	0.619116	1.00954	0.554384	KLF13;ZNF419;RFX5
Zinc Ion Binding (GO:0008270)	1/341	0.598536	0.635181	1.10899	0.569211	KMT2A
Ubiquitin-Protein Transferase Activity (GO:0004842)	1/412	0.668674	0.702445	0.914093	0.367885	MARCHF4
GTPase Regulator Activity (GO:0030695)	1/424	0.679276	0.706447	0.887616	0.343266	TBCD
Transition Metal Ion Binding (GO:0046914)	1/456	0.705947	0.726916	0.823838	0.286872	KMT2A
Purine Ribonucleoside Triphosphate Binding (GO:0035639)	1/476	0.721499	0.735646	0.78834	0.257334	MYO18A
Protein Kinase Binding (GO:0019901)	1/511	0.746795	0.754045	0.732919	0.213986	MICAL2
Protein Homodimerization Activity (GO:0042803)	1/662	0.832429	0.832429	0.561096	0.102909	KMT2A
