# Supplementary material for: Transcriptome of Subcutaneous Adipose Tissue reflect Membrane Dysfunction and Impaired Oxidative Processes in T2D across Heterogenous Populations
Source: Research Square preprint supplement (doi:10.21203/rs.3.rs-7053974/v1), 2025-11-14
Supplement: Supplementary file 10 [file d7db160df2a98c76187a472d.xlsx]

## Sheet: Reduced after BS
Gene names	Association ID	Ensemble ID	Protein names
7SK	ILMN_2074860	ENSG00000202198	7SK RNA
7SK	ILMN_2074860	ENSG00000271394	7SK RNA
ABCA5	ILMN_1722286	ENSG00000154265	ATP binding cassette subfamily A member 5
ABCC1	ILMN_1802404	ENSG00000103222	ATP binding cassette subfamily C member 1
ABCC6	ILMN_1778352	ENSG00000091262	ATP binding cassette subfamily C member 6
ABCC6	ILMN_2406654	ENSG00000091262	ATP binding cassette subfamily C member 6
ABCE1	ILMN_2330267	ENSG00000164163	ATP binding cassette subfamily E member 1
ABCE1	ILMN_1676846	ENSG00000164163	ATP binding cassette subfamily E member 1
ABCF1	ILMN_1763875	ENSG00000204574	ATP binding cassette subfamily F member 1
ABCF2	ILMN_1781999	ENSG00000033050	ATP binding cassette subfamily F member 2
ABCF2-H2BK1	ILMN_1781999	ENSG00000285292	ABCF2-H2BK1 readthrough
ABHD17B	ILMN_2374362	ENSG00000107362	abhydrolase domain containing 17B, depalmitoylase
ABHD2	ILMN_1723662	ENSG00000140526	abhydrolase domain containing 2, acylglycerol lipase
ABHD4	ILMN_1700633	ENSG00000100439	abhydrolase domain containing 4, N-acyl phospholipase B
ABHD5	ILMN_1655702	ENSG00000011198	abhydrolase domain containing 5, lysophosphatidic acid acyltransferase
ABL1	ILMN_1713732	ENSG00000097007	ABL proto-oncogene 1, non-receptor tyrosine kinase
ABL1	ILMN_1708922	ENSG00000097007	ABL proto-oncogene 1, non-receptor tyrosine kinase
ABL2	ILMN_1741628	ENSG00000143322	ABL proto-oncogene 2, non-receptor tyrosine kinase
ABL2	ILMN_1657870	ENSG00000143322	ABL proto-oncogene 2, non-receptor tyrosine kinase
ABL2	ILMN_2240003	ENSG00000143322	ABL proto-oncogene 2, non-receptor tyrosine kinase
ABRA	ILMN_1766991	ENSG00000174429	actin binding Rho activating protein
ABTB2	ILMN_1753370	ENSG00000166016	ankyrin repeat and BTB domain containing 2
ACADVL	ILMN_2352009	ENSG00000072778	acyl-CoA dehydrogenase very long chain
ACADVL	ILMN_2263466	ENSG00000072778	acyl-CoA dehydrogenase very long chain
ACADVL	ILMN_1806408	ENSG00000072778	acyl-CoA dehydrogenase very long chain
ACKR1	ILMN_1723684	ENSG00000213088	atypical chemokine receptor 1 (Duffy blood group)
ACOT9	ILMN_1658995	ENSG00000123130	acyl-CoA thioesterase 9
ACOX1	ILMN_1750158	ENSG00000161533	acyl-CoA oxidase 1
ACOX1	ILMN_1765767	ENSG00000161533	acyl-CoA oxidase 1
ACSL4	ILMN_1683598	ENSG00000068366	acyl-CoA synthetase long chain family member 4
ACSL4	ILMN_2391458	ENSG00000068366	acyl-CoA synthetase long chain family member 4
ACTL7B	ILMN_1796088	ENSG00000148156	actin like 7B
ACTN4	ILMN_1725534	ENSG00000130402	actinin alpha 4
ACTR1A	ILMN_1792314	ENSG00000138107	actin related protein 1A
ACVR1B	ILMN_1763916	ENSG00000135503	activin A receptor type 1B
ACVR1B	ILMN_2243308	ENSG00000135503	activin A receptor type 1B
ACVR1B	ILMN_1786544	ENSG00000135503	activin A receptor type 1B
ACVR1B	ILMN_1766723	ENSG00000135503	activin A receptor type 1B
ACYP2	ILMN_2158705	ENSG00000170634	acylphosphatase 2
ADAM12	ILMN_1785393	ENSG00000148848	ADAM metallopeptidase domain 12
ADAM17	ILMN_2121068	ENSG00000151694	ADAM metallopeptidase domain 17
ADAM19	ILMN_1713751	ENSG00000135074	ADAM metallopeptidase domain 19
ADAM2	ILMN_1662675	ENSG00000104755	ADAM metallopeptidase domain 2
ADAM23	ILMN_2060086	ENSG00000114948	ADAM metallopeptidase domain 23
ADAM8	ILMN_1708348	ENSG00000151651	ADAM metallopeptidase domain 8
ADAMTS1	ILMN_1673566	ENSG00000154734	ADAM metallopeptidase with thrombospondin type 1 motif 1
ADAMTS18	ILMN_1739872	ENSG00000140873	ADAM metallopeptidase with thrombospondin type 1 motif 18
ADAMTS18	ILMN_1770152	ENSG00000140873	ADAM metallopeptidase with thrombospondin type 1 motif 18
ADAMTS2	ILMN_1811765	ENSG00000087116	ADAM metallopeptidase with thrombospondin type 1 motif 2
ADAMTS4	ILMN_2092933	ENSG00000158859	ADAM metallopeptidase with thrombospondin type 1 motif 4
ADAMTS9	ILMN_1805543	ENSG00000163638	ADAM metallopeptidase with thrombospondin type 1 motif 9
ADAMTSL2	ILMN_1721495	ENSG00000197859	ADAMTS like 2
ADAP1	ILMN_2047511	ENSG00000105963	ArfGAP with dual PH domains 1
ADCY2	ILMN_1810691	ENSG00000078295	adenylate cyclase 2
ADGRE2	ILMN_2353633	ENSG00000127507	adhesion G protein-coupled receptor E2
ADGRE3	ILMN_2348487	ENSG00000131355	adhesion G protein-coupled receptor E3
ADGRE3	ILMN_1755873	ENSG00000131355	adhesion G protein-coupled receptor E3
ADGRE5	ILMN_1673363	ENSG00000123146	adhesion G protein-coupled receptor E5
ADGRE5	ILMN_2413508	ENSG00000123146	adhesion G protein-coupled receptor E5
ADGRG1	ILMN_2352097	ENSG00000205336	adhesion G protein-coupled receptor G1
ADGRG1	ILMN_2384122	ENSG00000205336	adhesion G protein-coupled receptor G1
ADGRG3	ILMN_1798977	ENSG00000182885	adhesion G protein-coupled receptor G3
ADGRG3	ILMN_1815054	ENSG00000182885	adhesion G protein-coupled receptor G3
ADM	ILMN_1708934	ENSG00000148926	adrenomedullin
ADNP2	ILMN_2080751	ENSG00000101544	ADNP homeobox 2
ADRA2A	ILMN_1659371	ENSG00000150594	adrenoceptor alpha 2A
ADRB2	ILMN_1695590	ENSG00000169252	adrenoceptor beta 2
AEN	ILMN_1814282	ENSG00000181026	apoptosis enhancing nuclease
AFF4	ILMN_1708502	ENSG00000072364	ALF transcription elongation factor 4
AFG1L	ILMN_2203987	ENSG00000135537	AFG1 like ATPase
AGFG1	ILMN_2196734	ENSG00000173744	ArfGAP with FG repeats 1
AGO2	ILMN_1695719	ENSG00000123908	argonaute RISC catalytic component 2
AGO3	ILMN_1809751	ENSG00000126070	argonaute RISC catalytic component 3
AGO3	ILMN_1761049	ENSG00000126070	argonaute RISC catalytic component 3
AGPAT3	ILMN_1654010	ENSG00000160216	1-acylglycerol-3-phosphate O-acyltransferase 3
AGPAT4	ILMN_1655572	ENSG00000026652	1-acylglycerol-3-phosphate O-acyltransferase 4
AHCTF1	ILMN_1747504	ENSG00000153207	AT-hook containing transcription factor 1
AHCYL1	ILMN_1770412	ENSG00000168710	adenosylhomocysteinase like 1
AHR	ILMN_2162799	ENSG00000106546	aryl hydrocarbon receptor
AHSP	ILMN_1696512	ENSG00000169877	alpha hemoglobin stabilizing protein
AKAP12	ILMN_1686846	ENSG00000131016	A-kinase anchoring protein 12
AKAP12	ILMN_2308950	ENSG00000131016	A-kinase anchoring protein 12
AKAP13	ILMN_2396956	ENSG00000170776	A-kinase anchoring protein 13
AKAP13	ILMN_1752247	ENSG00000170776	A-kinase anchoring protein 13
AKIRIN1	ILMN_1802799	ENSG00000174574	akirin 1
AKIRIN1	ILMN_1658337	ENSG00000174574	akirin 1
AKIRIN1	ILMN_1679383	ENSG00000174574	akirin 1
AKIRIN2	ILMN_2148847	ENSG00000135334	akirin 2
AKR1B15	ILMN_2278335	ENSG00000227471	aldo-keto reductase family 1 member B15
AKR1C2	ILMN_2412336	ENSG00000151632	aldo-keto reductase family 1 member C2
AKR1C3	ILMN_1713124	ENSG00000196139	aldo-keto reductase family 1 member C3
ALAS1	ILMN_2385647	ENSG00000023330	5'-aminolevulinate synthase 1
ALAS2	ILMN_2367126	ENSG00000158578	5'-aminolevulinate synthase 2
ALDH1A2	ILMN_2383707	ENSG00000128918	aldehyde dehydrogenase 1 family member A2
ALDH4A1	ILMN_2406557	ENSG00000159423	aldehyde dehydrogenase 4 family member A1
ALDH4A1	ILMN_1656368	ENSG00000159423	aldehyde dehydrogenase 4 family member A1
ALDH4A1	ILMN_2244841	ENSG00000159423	aldehyde dehydrogenase 4 family member A1
ALDOA	ILMN_1736700	ENSG00000149925	aldolase, fructose-bisphosphate A
ALDOB	ILMN_1747716	ENSG00000136872	aldolase, fructose-bisphosphate B
ALDOC	ILMN_1755974	ENSG00000109107	aldolase, fructose-bisphosphate C
ALOX5	ILMN_1680996	ENSG00000012779	arachidonate 5-lipoxygenase
ALOX5AP	ILMN_1797875	ENSG00000132965	arachidonate 5-lipoxygenase activating protein
ALYREF	ILMN_2364062	ENSG00000183684	Aly/REF export factor
AMD1	ILMN_1788462	ENSG00000123505	adenosylmethionine decarboxylase 1
AMD1	ILMN_1667994	ENSG00000123505	adenosylmethionine decarboxylase 1
AMMECR1L	ILMN_1727023	ENSG00000144233	AMMECR1 like
ANAPC11	ILMN_1726281	ENSG00000141552	anaphase promoting complex subunit 11
ANGPT1	ILMN_2086890	ENSG00000154188	angiopoietin 1
ANGPT2	ILMN_1774207	ENSG00000091879	angiopoietin 2
ANGPTL4	ILMN_1707727	ENSG00000167772	angiopoietin like 4
ANGPTL4	ILMN_2386444	ENSG00000167772	angiopoietin like 4
ANGPTL4	ILMN_1674376	ENSG00000167772	angiopoietin like 4
ANKDD1A	ILMN_1813139	ENSG00000166839	ankyrin repeat and death domain containing 1A
ANKRD1	ILMN_1716264	ENSG00000148677	ankyrin repeat domain 1
ANKRD13D	ILMN_1662902	ENSG00000172932	ankyrin repeat domain 13D
ANKRD17	ILMN_1787064	ENSG00000132466	ankyrin repeat domain 17
ANKRD28	ILMN_2232520	ENSG00000206560	ankyrin repeat domain 28
ANKRD30A	ILMN_1796059	ENSG00000148513	ankyrin repeat domain 30A
ANKRD37	ILMN_1756417	ENSG00000186352	ankyrin repeat domain 37
ANKRD40	ILMN_1758846	ENSG00000154945	ankyrin repeat domain 40
ANXA1	ILMN_2184184	ENSG00000135046	annexin A1
ANXA2	ILMN_1755937	ENSG00000182718	annexin A2
ANXA2	ILMN_1711899	ENSG00000182718	annexin A2
ANXA3	ILMN_1694548	ENSG00000138772	annexin A3
ANXA5	ILMN_1741003	ENSG00000164111	annexin A5
AOC2	ILMN_2405185	ENSG00000131480	amine oxidase copper containing 2
AOC2	ILMN_1741431	ENSG00000131480	amine oxidase copper containing 2
AP3D1	ILMN_1764945	ENSG00000065000	adaptor related protein complex 3 subunit delta 1
APOBEC3A	ILMN_1680192	ENSG00000128383	apolipoprotein B mRNA editing enzyme catalytic subunit 3A
APOLD1	ILMN_1723522	ENSG00000178878	apolipoprotein L domain containing 1
AQP11	ILMN_1762606	ENSG00000178301	aquaporin 11
AQP9	ILMN_1715068	ENSG00000103569	aquaporin 9
ARC	ILMN_1711120	ENSG00000198576	activity regulated cytoskeleton associated protein
ARF4	ILMN_1719518	ENSG00000168374	ADP ribosylation factor 4
ARF4	ILMN_1723884	ENSG00000168374	ADP ribosylation factor 4
ARFGEF2	ILMN_1789990	ENSG00000124198	ADP ribosylation factor guanine nucleotide exchange factor 2
ARG2	ILMN_1800898	ENSG00000081181	arginase 2
ARHGAP21	ILMN_1811592	ENSG00000107863	Rho GTPase activating protein 21
ARHGAP9	ILMN_2382657	ENSG00000123329	Rho GTPase activating protein 9
ARHGAP9	ILMN_1663916	ENSG00000123329	Rho GTPase activating protein 9
ARHGDIG	ILMN_2049274	ENSG00000242173	Rho GDP dissociation inhibitor gamma
ARHGEF1	ILMN_1772370	ENSG00000076928	Rho guanine nucleotide exchange factor 1
ARHGEF15	ILMN_1792571	ENSG00000198844	Rho guanine nucleotide exchange factor 15
ARID5A	ILMN_2415157	ENSG00000196843	AT-rich interaction domain 5A
ARID5A	ILMN_2298567	ENSG00000196843	AT-rich interaction domain 5A
ARID5A	ILMN_1689700	ENSG00000196843	AT-rich interaction domain 5A
ARID5B	ILMN_1721626	ENSG00000150347	AT-rich interaction domain 5B
ARIH1	ILMN_1694219	ENSG00000166233	ariadne RBR E3 ubiquitin protein ligase 1
ARK2N	ILMN_1801822	ENSG00000152242	arkadia (RNF111) N-terminal like PKA signaling regulator 2N
ARL13B	ILMN_2403047	ENSG00000169379	ADP ribosylation factor like GTPase 13B
ARL13B	ILMN_1777301	ENSG00000169379	ADP ribosylation factor like GTPase 13B
ARL4A	ILMN_1704842	ENSG00000122644	ADP ribosylation factor like GTPase 4A
ARL4A	ILMN_1753663	ENSG00000122644	ADP ribosylation factor like GTPase 4A
ARL4AP1	ILMN_1753663	ENSG00000122872	ADP ribosylation factor like GTPase 4A pseudogene 1
ARL4AP2	ILMN_1753663	ENSG00000248780	ADP ribosylation factor like GTPase 4A pseudogene 2
ARL5B	ILMN_2120022	ENSG00000165997	ADP ribosylation factor like GTPase 5B
ARL6	ILMN_2307266	ENSG00000113966	ADP ribosylation factor like GTPase 6
ARMC8	ILMN_1781151	ENSG00000114098	armadillo repeat containing 8
ARPC5L	ILMN_2043816	ENSG00000136950	actin related protein 2/3 complex subunit 5 like
ARPP21	ILMN_2289825	ENSG00000172995	cAMP regulated phosphoprotein 21
ARPP21	ILMN_2374728	ENSG00000172995	cAMP regulated phosphoprotein 21
ARRDC3	ILMN_2198515	ENSG00000113369	arrestin domain containing 3
ASAH1	ILMN_1684054	ENSG00000104763	N-acylsphingosine amidohydrolase 1
ASAH1	ILMN_1655509	ENSG00000104763	N-acylsphingosine amidohydrolase 1
ASB10	ILMN_1781148	ENSG00000146926	ankyrin repeat and SOCS box containing 10
ASGR1	ILMN_1769013	ENSG00000141505	asialoglycoprotein receptor 1
ASPH	ILMN_2352934	ENSG00000198363	aspartate beta-hydroxylase
ASPH	ILMN_1739719	ENSG00000198363	aspartate beta-hydroxylase
ASPH	ILMN_1693771	ENSG00000198363	aspartate beta-hydroxylase
ATAD3A	ILMN_2131936	ENSG00000197785	ATPase family AAA domain containing 3A
ATAD3B	ILMN_2131936	ENSG00000160072	ATPase family AAA domain containing 3B
ATAT1	ILMN_1760037	ENSG00000137343	alpha tubulin acetyltransferase 1
ATF2	ILMN_1748271	ENSG00000115966	activating transcription factor 2
ATF3	ILMN_2374865	ENSG00000162772	activating transcription factor 3
ATF3	ILMN_1661109	ENSG00000162772	activating transcription factor 3
ATF3	ILMN_1791346	ENSG00000162772	activating transcription factor 3
ATF4	ILMN_1672128	ENSG00000128272	activating transcription factor 4
ATF4	ILMN_2358457	ENSG00000128272	activating transcription factor 4
ATF4	ILMN_1783394	ENSG00000128272	activating transcription factor 4
ATF6	ILMN_1703471	ENSG00000118217	activating transcription factor 6
ATG101	ILMN_1772527	ENSG00000123395	autophagy related 101
ATG16L2	ILMN_1664644	ENSG00000168010	autophagy related 16 like 2
ATP1A1	ILMN_1731783	ENSG00000163399	ATPase Na+/K+ transporting subunit alpha 1
ATP1A1	ILMN_2415189	ENSG00000163399	ATPase Na+/K+ transporting subunit alpha 1
ATP1A1	ILMN_1775566	ENSG00000163399	ATPase Na+/K+ transporting subunit alpha 1
ATP1B3	ILMN_1759628	ENSG00000069849	ATPase Na+/K+ transporting subunit beta 3
ATP1B3	ILMN_1783304	ENSG00000069849	ATPase Na+/K+ transporting subunit beta 3
ATP1B3	ILMN_1654322	ENSG00000069849	ATPase Na+/K+ transporting subunit beta 3
ATP2A2	ILMN_1815666	ENSG00000174437	ATPase sarcoplasmic/endoplasmic reticulum Ca2+ transporting 2
ATP2A2	ILMN_1655884	ENSG00000174437	ATPase sarcoplasmic/endoplasmic reticulum Ca2+ transporting 2
ATP2A2	ILMN_1687375	ENSG00000174437	ATPase sarcoplasmic/endoplasmic reticulum Ca2+ transporting 2
ATP2B4	ILMN_1664772	ENSG00000058668	ATPase plasma membrane Ca2+ transporting 4
ATP2C1	ILMN_2340565	ENSG00000017260	ATPase secretory pathway Ca2+ transporting 1
ATP6V0A4	ILMN_1812896	ENSG00000105929	ATPase H+ transporting V0 subunit a4
ATP6V1G2	ILMN_1674778	ENSG00000213760	ATPase H+ transporting V1 subunit G2
ATP6V1G2-DDX39B	ILMN_1674778	ENSG00000254870	ATP6V1G2-DDX39B readthrough (NMD candidate)
ATPSCKMT	ILMN_2145044	ENSG00000150756	ATP synthase c subunit lysine N-methyltransferase
AVIL	ILMN_1674265	ENSG00000135407	advillin
AVL9	ILMN_1722292	ENSG00000105778	AVL9 cell migration associated
AZIN1	ILMN_1704550	ENSG00000155096	antizyme inhibitor 1
B3GNT2	ILMN_1711102	ENSG00000170340	UDP-GlcNAc:betaGal beta-1,3-N-acetylglucosaminyltransferase 2
B3GNT5	ILMN_1702609	ENSG00000176597	UDP-GlcNAc:betaGal beta-1,3-N-acetylglucosaminyltransferase 5
B4GALT3	ILMN_1692267	ENSG00000158850	beta-1,4-galactosyltransferase 3
B4GALT5	ILMN_1685824	ENSG00000158470	beta-1,4-galactosyltransferase 5
B9D2	ILMN_1806999	ENSG00000123810	B9 domain containing 2
BACH1	ILMN_1807181	ENSG00000156273	BTB domain and CNC homolog 1
BACH1-IT1	ILMN_1751149	ENSG00000248476	BACH1 intronic transcript 1
BAG3	ILMN_1659766	ENSG00000151929	BAG cochaperone 3
BAIAP2L1	ILMN_1703593	ENSG00000006453	BAR/IMD domain containing adaptor protein 2 like 1
BAMBI	ILMN_1691410	ENSG00000095739	BMP and activin membrane bound inhibitor
BATF	ILMN_1668822	ENSG00000156127	basic leucine zipper ATF-like transcription factor
BATF3	ILMN_1763207	ENSG00000123685	basic leucine zipper ATF-like transcription factor 3
BAZ1A	ILMN_1742230	ENSG00000198604	bromodomain adjacent to zinc finger domain 1A
BAZ1A	ILMN_1658327	ENSG00000198604	bromodomain adjacent to zinc finger domain 1A
BCAP29	ILMN_1715928	ENSG00000075790	B cell receptor associated protein 29
BCAP29	ILMN_1697642	ENSG00000075790	B cell receptor associated protein 29
BCAP29	ILMN_2342084	ENSG00000075790	B cell receptor associated protein 29
BCAR1	ILMN_1672596	ENSG00000050820	BCAR1 scaffold protein, Cas family member
BCAR3	ILMN_1763638	ENSG00000137936	BCAR3 adaptor protein, NSP family member
BCAS4	ILMN_2248912	ENSG00000124243	breast carcinoma amplified sequence 4
BCCIP	ILMN_1771966	ENSG00000107949	BRCA2 and CDKN1A interacting protein
BCCIP	ILMN_1811188	ENSG00000107949	BRCA2 and CDKN1A interacting protein
BCL10	ILMN_1716446	ENSG00000142867	BCL10 immune signaling adaptor
BCL2	ILMN_2363250	ENSG00000171791	BCL2 apoptosis regulator
BCL2L1	ILMN_1742410	ENSG00000171552	BCL2 like 1
BCL2L12	ILMN_1731193	ENSG00000126453	BCL2 like 12
BCL3	ILMN_1710514	ENSG00000069399	BCL3 transcription coactivator
BCL6	ILMN_1737314	ENSG00000113916	BCL6 transcription repressor
BCL6	ILMN_1746053	ENSG00000113916	BCL6 transcription repressor
BCL6B	ILMN_1651285	ENSG00000161940	BCL6B transcription repressor
BCL7B	ILMN_1754199	ENSG00000106635	BAF chromatin remodeling complex subunit BCL7B
BCL7B	ILMN_2367275	ENSG00000106635	BAF chromatin remodeling complex subunit BCL7B
BCOR	ILMN_1773117	ENSG00000183337	BCL6 corepressor
BCR	ILMN_1670398	ENSG00000186716	BCR activator of RhoGEF and GTPase
BCR	ILMN_1680683	ENSG00000186716	BCR activator of RhoGEF and GTPase
BCR	ILMN_2333146	ENSG00000186716	BCR activator of RhoGEF and GTPase
BDKRB1	ILMN_1734611	ENSG00000100739	bradykinin receptor B1
BDKRB2	ILMN_1684086	ENSG00000168398	bradykinin receptor B2
BEGAIN	ILMN_1668924	ENSG00000183092	brain enriched guanylate kinase associated
BEST1	ILMN_1718982	ENSG00000167995	bestrophin 1
BEX1	ILMN_2234697	ENSG00000133169	brain expressed X-linked 1
BGLAP	ILMN_1755818	ENSG00000242252	bone gamma-carboxyglutamate protein
BHLHE40	ILMN_1768534	ENSG00000134107	basic helix-loop-helix family member e40
BHMT2	ILMN_2070521	ENSG00000132840	betaine--homocysteine S-methyltransferase 2
BIN3	ILMN_1708485	ENSG00000147439	bridging integrator 3
BIRC3	ILMN_1776181	ENSG00000023445	baculoviral IAP repeat containing 3
BIRC3	ILMN_1681644	ENSG00000023445	baculoviral IAP repeat containing 3
BLOC1S2	ILMN_1679782	ENSG00000196072	biogenesis of lysosomal organelles complex 1 subunit 2
BMP2	ILMN_1722718	ENSG00000125845	bone morphogenetic protein 2
BNIP2	ILMN_1770803	ENSG00000140299	BCL2 interacting protein 2
BOLA1	ILMN_1768973	ENSG00000178096	bolA family member 1
BORCS7	ILMN_2151056	ENSG00000166275	BLOC-1 related complex subunit 7
BPI	ILMN_1766736	ENSG00000101425	bactericidal permeability increasing protein
BPNT2	ILMN_1696311	ENSG00000104331	3'(2'), 5'-bisphosphate nucleotidase 2
BRD2	ILMN_1758918	ENSG00000204256	bromodomain containing 2
BRIX1	ILMN_2155172	ENSG00000113460	biogenesis of ribosomes BRX1
BRWD1	ILMN_1779264	ENSG00000185658	bromodomain and WD repeat domain containing 1
BST1	ILMN_1770161	ENSG00000109743	bone marrow stromal cell antigen 1
BTBD1	ILMN_1691927	ENSG00000064726	BTB domain containing 1
BTBD3	ILMN_2334350	ENSG00000132640	BTB domain containing 3
BTBD7	ILMN_1757298	ENSG00000011114	BTB domain containing 7
BTBD9	ILMN_1732271	ENSG00000183826	BTB domain containing 9
BTG1	ILMN_1775743	ENSG00000133639	BTG anti-proliferation factor 1
BTG2	ILMN_1770085	ENSG00000159388	BTG anti-proliferation factor 2
BTG3	ILMN_2154836	ENSG00000154640	BTG anti-proliferation factor 3
BTLA	ILMN_2099528	ENSG00000186265	B and T lymphocyte associated
BVES	ILMN_1689237	ENSG00000112276	blood vessel epicardial substance
BYSL	ILMN_1682792	ENSG00000112578	bystin like
C10orf90	ILMN_1680367	ENSG00000154493	chromosome 10 open reading frame 90
C15orf39	ILMN_1793729	ENSG00000167173	chromosome 15 open reading frame 39
C19orf12	ILMN_1718365	ENSG00000131943	chromosome 19 open reading frame 12
C19orf12	ILMN_1703695	ENSG00000131943	chromosome 19 open reading frame 12
C19orf12	ILMN_1664920	ENSG00000131943	chromosome 19 open reading frame 12
C19orf73	ILMN_1721628	ENSG00000221916	chromosome 19 open reading frame 73
C1GALT1	ILMN_1662578	ENSG00000106392	core 1 synthase, glycoprotein-N-acetylgalactosamine 3-beta-galactosyltransferase 1
C1orf198	ILMN_1657683	ENSG00000119280	chromosome 1 open reading frame 198
C1orf53	ILMN_1661595	ENSG00000203724	chromosome 1 open reading frame 53
C1orf56	ILMN_1780268	ENSG00000143443	chromosome 1 open reading frame 56
C21orf91	ILMN_2110496	ENSG00000154642	chromosome 21 open reading frame 91
C2CD2	ILMN_2384513	ENSG00000157617	C2 calcium dependent domain containing 2
C2CD4A	ILMN_1769925	ENSG00000198535	C2 calcium dependent domain containing 4A
C2CD4B	ILMN_1748751	ENSG00000205502	C2 calcium dependent domain containing 4B
C2CD4B	ILMN_1752065	ENSG00000205502	C2 calcium dependent domain containing 4B
C2orf49	ILMN_1701131	ENSG00000135974	chromosome 2 open reading frame 49
C3orf52	ILMN_2184612	ENSG00000114529	chromosome 3 open reading frame 52
C4A	ILMN_2179533	ENSG00000244731	complement C4A (Rodgers blood group)
C4orf19	ILMN_1795838	ENSG00000154274	chromosome 4 open reading frame 19
C5AR1	ILMN_1689836	ENSG00000197405	complement C5a receptor 1
C8orf76	ILMN_1742074	ENSG00000189376	chromosome 8 open reading frame 76
C9orf72	ILMN_1666742	ENSG00000147894	C9orf72-SMCR8 complex subunit
C9orf72	ILMN_2295252	ENSG00000147894	C9orf72-SMCR8 complex subunit
CA1	ILMN_1652431	ENSG00000133742	carbonic anhydrase 1
CA13	ILMN_1802414	ENSG00000185015	carbonic anhydrase 13
CAB39L	ILMN_1783598	ENSG00000102547	calcium binding protein 39 like
CACNA2D1	ILMN_1768533	ENSG00000153956	calcium voltage-gated channel auxiliary subunit alpha2delta 1
CADM2	ILMN_1664679	ENSG00000175161	cell adhesion molecule 2
CALM1	ILMN_1778242	ENSG00000198668	calmodulin 1
CALR3	ILMN_2167223	ENSG00000269058	calreticulin 3
CAMP	ILMN_1688580	ENSG00000164047	cathelicidin antimicrobial peptide
CAMSAP2	ILMN_1792660	ENSG00000118200	calmodulin regulated spectrin associated protein family member 2
CAMTA1	ILMN_1661940	ENSG00000171735	calmodulin binding transcription activator 1
CAP2	ILMN_1691237	ENSG00000112186	cyclase associated actin cytoskeleton regulatory protein 2
CAPRIN1	ILMN_1782897	ENSG00000135387	cell cycle associated protein 1
CARD16	ILMN_1726591	ENSG00000204397	caspase recruitment domain family member 16
CARD19	ILMN_1659189	ENSG00000165233	caspase recruitment domain family member 19
CARD6	ILMN_1779854	ENSG00000132357	caspase recruitment domain family member 6
CASP3	ILMN_2388155	ENSG00000164305	caspase 3
CASP4	ILMN_1678454	ENSG00000196954	caspase 4
CASP4	ILMN_1778059	ENSG00000196954	caspase 4
CASP9	ILMN_1718070	ENSG00000132906	caspase 9
CASZ1	ILMN_1655191	ENSG00000130940	castor zinc finger 1
CAVIN2	ILMN_1715991	ENSG00000168497	caveolae associated protein 2
CBLB	ILMN_1685580	ENSG00000114423	Cbl proto-oncogene B
CBLL1	ILMN_2073732	ENSG00000105879	Cbl proto-oncogene like 1
CBLN2	ILMN_1796069	ENSG00000141668	cerebellin 2 precursor
CCDC107	ILMN_1709630	ENSG00000159884	coiled-coil domain containing 107
CCDC184	ILMN_1779428	ENSG00000177875	coiled-coil domain containing 184
CCDC184	ILMN_1672121	ENSG00000177875	coiled-coil domain containing 184
CCDC69	ILMN_1657680	ENSG00000198624	coiled-coil domain containing 69
CCDC71L	ILMN_1696029	ENSG00000253276	coiled-coil domain containing 71 like
CCDC80	ILMN_1803338	ENSG00000091986	coiled-coil domain containing 80
CCDC9	ILMN_1719190	ENSG00000105321	coiled-coil domain containing 9
CCL2	ILMN_1720048	ENSG00000108691	C-C motif chemokine ligand 2
CCL20	ILMN_1657234	ENSG00000115009	C-C motif chemokine ligand 20
CCL3	ILMN_1671509	ENSG00000277632	C-C motif chemokine ligand 3
CCL3L3	ILMN_2105573	ENSG00000276085	C-C motif chemokine ligand 3 like 3
CCL3L3	ILMN_2218856	ENSG00000276085	C-C motif chemokine ligand 3 like 3
CCL4L2	ILMN_2100209	ENSG00000276070	C-C motif chemokine ligand 4 like 2
CCL8	ILMN_1772964	ENSG00000108700	C-C motif chemokine ligand 8
CCM2	ILMN_1692271	ENSG00000136280	CCM2 scaffold protein
CCN1	ILMN_2188264	ENSG00000142871	cellular communication network factor 1
CCN2	ILMN_2115125	ENSG00000118523	cellular communication network factor 2
CCND1	ILMN_1688480	ENSG00000110092	cyclin D1
CCND2	ILMN_2067656	ENSG00000118971	cyclin D2
CCND3	ILMN_1668721	ENSG00000112576	cyclin D3
CCNK	ILMN_1689123	ENSG00000090061	cyclin K
CCNL1	ILMN_2094776	ENSG00000163660	cyclin L1
CCNT1	ILMN_1692390	ENSG00000129315	cyclin T1
CCNYL1	ILMN_2166524	ENSG00000163249	cyclin Y like 1
CCPG1	ILMN_2409290	ENSG00000260916	cell cycle progression 1
CCPG1	ILMN_1794190	ENSG00000260916	cell cycle progression 1
CCR7	ILMN_1715131	ENSG00000126353	C-C motif chemokine receptor 7
CCT2	ILMN_1679382	ENSG00000166226	chaperonin containing TCP1 subunit 2
CCT5	ILMN_1706246	ENSG00000150753	chaperonin containing TCP1 subunit 5
CCT6A	ILMN_1719611	ENSG00000146731	chaperonin containing TCP1 subunit 6A
CCT6P3	ILMN_1719611	ENSG00000234585	chaperonin containing TCP1 subunit 6 pseudogene 3
CCT6P3	ILMN_1719611	ENSG00000290860	chaperonin containing TCP1 subunit 6 pseudogene 3
CD151	ILMN_1794740	ENSG00000177697	CD151 molecule (Raph blood group)
CD151	ILMN_1661589	ENSG00000177697	CD151 molecule (Raph blood group)
CD151	ILMN_2326713	ENSG00000177697	CD151 molecule (Raph blood group)
CD200	ILMN_1787750	ENSG00000091972	CD200 molecule
CD274	ILMN_1701914	ENSG00000120217	CD274 molecule
CD44	ILMN_1778625	ENSG00000026508	CD44 molecule (Indian blood group)
CD46	ILMN_2307740	ENSG00000117335	CD46 molecule
CD55	ILMN_1800540	ENSG00000196352	CD55 molecule (Cromer blood group)
CD59	ILMN_2333687	ENSG00000085063	CD59 molecule (CD59 blood group)
CD59	ILMN_1724789	ENSG00000085063	CD59 molecule (CD59 blood group)
CD69	ILMN_2188333	ENSG00000110848	CD69 molecule
CD83	ILMN_2328666	ENSG00000112149	CD83 molecule
CD83	ILMN_1780582	ENSG00000112149	CD83 molecule
CD86	ILMN_1782560	ENSG00000114013	CD86 molecule
CD93	ILMN_1704730	ENSG00000125810	CD93 molecule
CDA	ILMN_1714592	ENSG00000158825	cytidine deaminase
CDC37	ILMN_1668369	ENSG00000105401	cell division cycle 37, HSP90 cochaperone
CDC42	ILMN_1675156	ENSG00000070831	cell division cycle 42
CDC42EP1	ILMN_1764927	ENSG00000128283	CDC42 effector protein 1
CDC42EP2	ILMN_1652777	ENSG00000149798	CDC42 effector protein 2
CDC42EP3	ILMN_1736327	ENSG00000163171	CDC42 effector protein 3
CDC42EP4	ILMN_1745223	ENSG00000179604	CDC42 effector protein 4
CDC42SE1	ILMN_1769027	ENSG00000197622	CDC42 small effector 1
CDC42SE1	ILMN_2349138	ENSG00000197622	CDC42 small effector 1
CDC7	ILMN_1741801	ENSG00000097046	cell division cycle 7
CDH13	ILMN_1766925	ENSG00000140945	cadherin 13
CDH7	ILMN_1716300	ENSG00000081138	cadherin 7
CDK11A	ILMN_2330552	ENSG00000008128	cyclin dependent kinase 11A
CDK11B	ILMN_2330552	ENSG00000248333	cyclin dependent kinase 11B
CDK17	ILMN_1780824	ENSG00000059758	cyclin dependent kinase 17
CDK2	ILMN_1665559	ENSG00000123374	cyclin dependent kinase 2
CDK2	ILMN_1653443	ENSG00000123374	cyclin dependent kinase 2
CDK9	ILMN_1747556	ENSG00000136807	cyclin dependent kinase 9
CDKL1	ILMN_1724183	ENSG00000100490	cyclin dependent kinase like 1
CDKN1A	ILMN_1784602	ENSG00000124762	cyclin dependent kinase inhibitor 1A
CDKN1A	ILMN_1787212	ENSG00000124762	cyclin dependent kinase inhibitor 1A
CDKN2B	ILMN_2376723	ENSG00000147883	cyclin dependent kinase inhibitor 2B
CDKN2D	ILMN_1748883	ENSG00000129355	cyclin dependent kinase inhibitor 2D
CDR2	ILMN_1720270	ENSG00000140743	cerebellar degeneration related protein 2
CDR2L	ILMN_2128770	ENSG00000109089	cerebellar degeneration related protein 2 like
CDV3	ILMN_1673788	ENSG00000091527	CDV3 homolog
CDV3	ILMN_1810977	ENSG00000091527	CDV3 homolog
CDY1	ILMN_2363185	ENSG00000172288	chromodomain Y-linked 1
CDY1B	ILMN_2363185	ENSG00000172352	chromodomain Y-linked 1B
CDY2A	ILMN_2363185	ENSG00000182415	chromodomain Y-linked 2A
CDY2B	ILMN_2363185	ENSG00000129873	chromodomain Y-linked 2B
CEACAM1	ILMN_1716815	ENSG00000079385	CEA cell adhesion molecule 1
CEACAM1	ILMN_2371724	ENSG00000079385	CEA cell adhesion molecule 1
CEACAM1	ILMN_1664330	ENSG00000079385	CEA cell adhesion molecule 1
CEACAM3	ILMN_1743570	ENSG00000170956	CEA cell adhesion molecule 3
CEBPB	ILMN_1693014	ENSG00000172216	CCAAT enhancer binding protein beta
CEBPD	ILMN_1782050	ENSG00000221869	CCAAT enhancer binding protein delta
CELF1	ILMN_1686516	ENSG00000149187	CUGBP Elav-like family member 1
CELF2	ILMN_1800638	ENSG00000048740	CUGBP Elav-like family member 2
CEMIP2	ILMN_1784661	ENSG00000135048	cell migration inducing hyaluronidase 2
CENPN	ILMN_1720526	ENSG00000166451	centromere protein N
CEP19	ILMN_1665217	ENSG00000174007	centrosomal protein 19
CES1	ILMN_2359945	ENSG00000198848	carboxylesterase 1
CES1P1	ILMN_2359945	ENSG00000228695	carboxylesterase 1 pseudogene 1
CES1P1	ILMN_2359945	ENSG00000291109	carboxylesterase 1 pseudogene 1
CFAP161	ILMN_1686373	ENSG00000156206	cilia and flagella associated protein 161
CFAP20	ILMN_2112599	ENSG00000070761	cilia and flagella associated protein 20
CFAP221	ILMN_1804163	ENSG00000163075	cilia and flagella associated protein 221
CFAP298	ILMN_1776147	ENSG00000159079	cilia and flagella associated protein 298
CFAP298-TCP10L	ILMN_1776147	ENSG00000265590	CFAP298-TCP10L readthrough
CFAP44	ILMN_2189037	ENSG00000206530	cilia and flagella associated protein 44
CFAP69	ILMN_1790315	ENSG00000105792	cilia and flagella associated protein 69
CFH	ILMN_1698144	ENSG00000000971	complement factor H
CFH	ILMN_1657803	ENSG00000000971	complement factor H
CFH	ILMN_2412192	ENSG00000000971	complement factor H
CGAS	ILMN_1706645	ENSG00000164430	cyclic GMP-AMP synthase
CGGBP1	ILMN_2387090	ENSG00000163320	CGG triplet repeat binding protein 1
CH25H	ILMN_1741021	ENSG00000138135	cholesterol 25-hydroxylase
CHD1	ILMN_1654583	ENSG00000153922	chromodomain helicase DNA binding protein 1
CHD2	ILMN_2339284	ENSG00000173575	chromodomain helicase DNA binding protein 2
CHD7	ILMN_1677376	ENSG00000171316	chromodomain helicase DNA binding protein 7
CHIC2	ILMN_1679428	ENSG00000109220	cysteine rich hydrophobic domain 2
CHMP1B	ILMN_1763265	ENSG00000255112	charged multivesicular body protein 1B
CHRNA10	ILMN_1776314	ENSG00000129749	cholinergic receptor nicotinic alpha 10 subunit
CHRNA6	ILMN_1756578	ENSG00000147434	cholinergic receptor nicotinic alpha 6 subunit
CHST15	ILMN_1670926	ENSG00000182022	carbohydrate sulfotransferase 15
CHST2	ILMN_1794011	ENSG00000175040	carbohydrate sulfotransferase 2
CHST3	ILMN_1723481	ENSG00000122863	carbohydrate sulfotransferase 3
CHSY1	ILMN_1791576	ENSG00000131873	chondroitin sulfate synthase 1
CHUK	ILMN_1677041	ENSG00000213341	component of inhibitor of nuclear factor kappa B kinase complex
CIMAP1C	ILMN_1758008	ENSG00000182950	ciliary microtubule associated protein 1C
CKMT2	ILMN_1764266	ENSG00000131730	creatine kinase, mitochondrial 2
CKS2	ILMN_2072296	ENSG00000123975	CDC28 protein kinase regulatory subunit 2
CLC	ILMN_1654875	ENSG00000105205	Charcot-Leyden crystal galectin
CLCF1	ILMN_1661197	ENSG00000175505	cardiotrophin like cytokine factor 1
CLCN4	ILMN_1728369	ENSG00000073464	chloride voltage-gated channel 4
CLDN15	ILMN_1682226	ENSG00000106404	claudin 15
CLDND1	ILMN_2352563	ENSG00000080822	claudin domain containing 1
CLDND1	ILMN_1710326	ENSG00000080822	claudin domain containing 1
CLEC4D	ILMN_1808979	ENSG00000166527	C-type lectin domain family 4 member D
CLEC4E	ILMN_1771664	ENSG00000166523	C-type lectin domain family 4 member E
CLEC7A	ILMN_2323992	ENSG00000172243	C-type lectin domain containing 7A
CLEC7A	ILMN_1700610	ENSG00000172243	C-type lectin domain containing 7A
CLIC4	ILMN_1671250	ENSG00000169504	chloride intracellular channel 4
CLIC4	ILMN_2063586	ENSG00000169504	chloride intracellular channel 4
CLIC4P1	ILMN_1671250	ENSG00000236739	chloride intracellular channel 4 pseudogene 1
CLIC5	ILMN_1778964	ENSG00000112782	chloride intracellular channel 5
CLIP1	ILMN_1723058	ENSG00000130779	CAP-Gly domain containing linker protein 1
CLIP1	ILMN_2404085	ENSG00000130779	CAP-Gly domain containing linker protein 1
CLK1	ILMN_1652790	ENSG00000013441	CDC like kinase 1
CLK3	ILMN_1695961	ENSG00000179335	CDC like kinase 3
CLK3	ILMN_2320336	ENSG00000179335	CDC like kinase 3
CLPTM1L	ILMN_1752802	ENSG00000049656	CLPTM1 like
CMC2	ILMN_1783333	ENSG00000103121	C-X9-C motif containing 2
CMTM2	ILMN_1799030	ENSG00000140932	CKLF like MARVEL transmembrane domain containing 2
CNKSR3	ILMN_1748844	ENSG00000153721	CNKSR family member 3
CNOT4	ILMN_1794324	ENSG00000080802	CCR4-NOT transcription complex subunit 4
CNOT9	ILMN_2044085	ENSG00000144580	CCR4-NOT transcription complex subunit 9
CNST	ILMN_1670263	ENSG00000162852	consortin, connexin sorting protein
CNTN6	ILMN_1699317	ENSG00000134115	contactin 6
COA4	ILMN_1732750	ENSG00000181924	cytochrome c oxidase assembly factor 4 homolog
COL12A1	ILMN_1733756	ENSG00000111799	collagen type XII alpha 1 chain
COL15A1	ILMN_1768940	ENSG00000204291	collagen type XV alpha 1 chain
COL24A1	ILMN_1810996	ENSG00000171502	collagen type XXIV alpha 1 chain
COL4A1	ILMN_1653028	ENSG00000187498	collagen type IV alpha 1 chain
COLEC11	ILMN_1735192	ENSG00000118004	collectin subfamily member 11
COLEC11	ILMN_2414268	ENSG00000118004	collectin subfamily member 11
COMT	ILMN_1810941	ENSG00000093010	catechol-O-methyltransferase
COQ10B	ILMN_1751615	ENSG00000115520	coenzyme Q10B
CORO1A	ILMN_1713749	ENSG00000102879	coronin 1A
CORO1C	ILMN_1745954	ENSG00000110880	coronin 1C
COX19	ILMN_2047511	ENSG00000240230	cytochrome c oxidase assembly factor COX19
COX7A1	ILMN_1662419	ENSG00000161281	cytochrome c oxidase subunit 7A1
CPEB4	ILMN_1722025	ENSG00000113742	cytoplasmic polyadenylation element binding protein 4
CPM	ILMN_1698313	ENSG00000135678	carboxypeptidase M
CPNE8	ILMN_2169761	ENSG00000139117	copine 8
CPSF7	ILMN_1680494	ENSG00000149532	cleavage and polyadenylation specific factor 7
CRACDL	ILMN_1776121	ENSG00000196872	CRACD like
CRADD	ILMN_1690282	ENSG00000169372	CASP2 and RIPK1 domain containing adaptor with death domain
CREB3L2	ILMN_1751097	ENSG00000182158	cAMP responsive element binding protein 3 like 2
CREB5	ILMN_1728677	ENSG00000146592	cAMP responsive element binding protein 5
CRELD1	ILMN_2404548	ENSG00000163703	cysteine rich with EGF like domains 1
CRHBP	ILMN_2223561	ENSG00000145708	corticotropin releasing hormone binding protein
CRIM1	ILMN_2146418	ENSG00000150938	cysteine rich transmembrane BMP regulator 1
CRIP2	ILMN_1694432	ENSG00000182809	cysteine rich protein 2
CRISPLD2	ILMN_1790689	ENSG00000103196	cysteine rich secretory protein LCCL domain containing 2
CRK	ILMN_1686805	ENSG00000167193	CRK proto-oncogene, adaptor protein
CRK	ILMN_1666494	ENSG00000167193	CRK proto-oncogene, adaptor protein
CRLF3	ILMN_2155228	ENSG00000176390	cytokine receptor like factor 3
CRTAP	ILMN_1720484	ENSG00000170275	cartilage associated protein
CRY1	ILMN_2202637	ENSG00000008405	cryptochrome circadian regulator 1
CRYAB	ILMN_1729216	ENSG00000109846	crystallin alpha B
CSDE1	ILMN_1683538	ENSG00000009307	cold shock domain containing E1
CSF1	ILMN_1733402	ENSG00000184371	colony stimulating factor 1
CSF2	ILMN_1661861	ENSG00000164400	colony stimulating factor 2
CSF3	ILMN_1697069	ENSG00000108342	colony stimulating factor 3
CSF3	ILMN_2322768	ENSG00000108342	colony stimulating factor 3
CSF3R	ILMN_2371280	ENSG00000119535	colony stimulating factor 3 receptor
CSF3R	ILMN_2323172	ENSG00000119535	colony stimulating factor 3 receptor
CSNK1A1	ILMN_2364174	ENSG00000113712	casein kinase 1 alpha 1
CSNK1A1	ILMN_1775058	ENSG00000113712	casein kinase 1 alpha 1
CSNK1A1	ILMN_1785988	ENSG00000113712	casein kinase 1 alpha 1
CSNK1D	ILMN_1720708	ENSG00000141551	casein kinase 1 delta
CSNK1D	ILMN_2286870	ENSG00000141551	casein kinase 1 delta
CSRNP1	ILMN_1703123	ENSG00000144655	cysteine and serine rich nuclear protein 1
CSRNP2	ILMN_2187533	ENSG00000110925	cysteine and serine rich nuclear protein 2
CSTA	ILMN_1669888	ENSG00000121552	cystatin A
CSTF1	ILMN_1735185	ENSG00000101138	cleavage stimulation factor subunit 1
CTNNB1	ILMN_1757350	ENSG00000168036	catenin beta 1
CTRC	ILMN_1748730	ENSG00000162438	chymotrypsin C
CTSL	ILMN_1812995	ENSG00000135047	cathepsin L
CTSL	ILMN_2374036	ENSG00000135047	cathepsin L
CTSL	ILMN_1694757	ENSG00000135047	cathepsin L
CTTNBP2NL	ILMN_1719517	ENSG00000143079	CTTNBP2 N-terminal like
CTU2	ILMN_1779184	ENSG00000174177	cytosolic thiouridylase subunit 2
CWC25	ILMN_1720233	ENSG00000273559	CWC25 spliceosome associated protein homolog
CX3CL1	ILMN_1654072	ENSG00000006210	C-X3-C motif chemokine ligand 1
CXCL1	ILMN_1787897	ENSG00000163739	C-X-C motif chemokine ligand 1
CXCL2	ILMN_1682636	ENSG00000081041	C-X-C motif chemokine ligand 2
CXCL5	ILMN_2171384	ENSG00000163735	C-X-C motif chemokine ligand 5
CXCL8	ILMN_2184373	ENSG00000169429	C-X-C motif chemokine ligand 8
CXCR1	ILMN_1662524	ENSG00000163464	C-X-C motif chemokine receptor 1
CXCR2	ILMN_1680397	ENSG00000180871	C-X-C motif chemokine receptor 2
CXCR4	ILMN_2320888	ENSG00000121966	C-X-C motif chemokine receptor 4
CXCR4	ILMN_1801584	ENSG00000121966	C-X-C motif chemokine receptor 4
CYB5D1	ILMN_1670925	ENSG00000182224	cytochrome b5 domain containing 1
CYCS	ILMN_1730416	ENSG00000172115	cytochrome c, somatic
CYP26A1	ILMN_1651490	ENSG00000095596	cytochrome P450 family 26 subfamily A member 1
CYP27B1	ILMN_1740418	ENSG00000111012	cytochrome P450 family 27 subfamily B member 1
CYP46A1	ILMN_1697433	ENSG00000036530	cytochrome P450 family 46 subfamily A member 1
CYP4B1	ILMN_2173291	ENSG00000142973	cytochrome P450 family 4 subfamily B member 1
CYSLTR1	ILMN_1733276	ENSG00000173198	cysteinyl leukotriene receptor 1
CYSTM1	ILMN_1761566	ENSG00000120306	cysteine rich transmembrane module containing 1
CYTH1	ILMN_2403852	ENSG00000108669	cytohesin 1
CYTH1	ILMN_1694084	ENSG00000108669	cytohesin 1
CYTH2	ILMN_2377459	ENSG00000105443	cytohesin 2
CYTH2	ILMN_1721241	ENSG00000105443	cytohesin 2
CYTOR	ILMN_2143795	ENSG00000222041	cytoskeleton regulator RNA
CYTOR	ILMN_1665515	ENSG00000222041	cytoskeleton regulator RNA
DAB2IP	ILMN_1783161	ENSG00000136848	DAB2 interacting protein
DAB2IP	ILMN_1808850	ENSG00000136848	DAB2 interacting protein
DACT1	ILMN_1801068	ENSG00000165617	dishevelled binding antagonist of beta catenin 1
DAW1	ILMN_1775042	ENSG00000123977	dynein assembly factor with WD repeats 1
DBNDD1	ILMN_1757631	ENSG00000003249	dysbindin domain containing 1
DBNDD1	ILMN_2374352	ENSG00000003249	dysbindin domain containing 1
DCAF1	ILMN_2181089	ENSG00000145041	DDB1 and CUL4 associated factor 1
DCAF4L2	ILMN_1768454	ENSG00000176566	DDB1 and CUL4 associated factor 4 like 2
DCP1A	ILMN_1809285	ENSG00000272886	decapping mRNA 1A
DCUN1D3	ILMN_1665455	ENSG00000188215	defective in cullin neddylation 1 domain containing 3
DCUN1D5	ILMN_2124352	ENSG00000137692	defective in cullin neddylation 1 domain containing 5
DDX20	ILMN_1694983	ENSG00000064703	DEAD-box helicase 20
DDX21	ILMN_1735461	ENSG00000165732	DExD-box helicase 21
DDX24	ILMN_1700628	ENSG00000089737	DEAD-box helicase 24
DDX39A	ILMN_1747303	ENSG00000123136	DExD-box helicase 39A
DDX3X	ILMN_1794392	ENSG00000215301	DEAD-box helicase 3 X-linked
DDX3X	ILMN_1728870	ENSG00000215301	DEAD-box helicase 3 X-linked
DDX42	ILMN_1674163	ENSG00000198231	DEAD-box helicase 42
DDX43	ILMN_1813893	ENSG00000080007	DEAD-box helicase 43
DDX5	ILMN_1805344	ENSG00000108654	DEAD-box helicase 5
DDX54	ILMN_1812976	ENSG00000123064	DEAD-box helicase 54
DDX59	ILMN_1748077	ENSG00000118197	DEAD-box helicase 59
DECR2	ILMN_1783337	ENSG00000242612	2,4-dienoyl-CoA reductase 2
DEDD	ILMN_1699711	ENSG00000158796	death effector domain containing
DEDD	ILMN_2313074	ENSG00000158796	death effector domain containing
DEFA1	ILMN_2193213	ENSG00000206047	defensin alpha 1
DEFA1	ILMN_2165289	ENSG00000206047	defensin alpha 1
DEFA1	ILMN_2102721	ENSG00000206047	defensin alpha 1
DEFA1B	ILMN_2193213	ENSG00000240247	defensin alpha 1B
DEFA1B	ILMN_2165289	ENSG00000240247	defensin alpha 1B
DEFA1B	ILMN_2102721	ENSG00000240247	defensin alpha 1B
DEFA3	ILMN_2193213	ENSG00000239839	defensin alpha 3
DEFA3	ILMN_2165289	ENSG00000239839	defensin alpha 3
DEFA3	ILMN_2102721	ENSG00000239839	defensin alpha 3
DEFB103A	ILMN_2132515	ENSG00000176797	defensin beta 103A
DEFB103B	ILMN_2132515	ENSG00000177243	defensin beta 103B
DEGS1	ILMN_1667430	ENSG00000143753	delta 4-desaturase, sphingolipid 1
DENND1A	ILMN_1727315	ENSG00000119522	DENN domain containing 1A
DENND3	ILMN_1692742	ENSG00000105339	DENN domain containing 3
DENND4A	ILMN_2041161	ENSG00000174485	DENN domain containing 4A
DENND5A	ILMN_1785356	ENSG00000184014	DENN domain containing 5A
DEPP1	ILMN_1767556	ENSG00000165507	DEPP autophagy regulator 1
DGKH	ILMN_1714087	ENSG00000102780	diacylglycerol kinase eta
DHDDS	ILMN_1789535	ENSG00000117682	dehydrodolichyl diphosphate synthase subunit
DHDDS	ILMN_2405642	ENSG00000117682	dehydrodolichyl diphosphate synthase subunit
DHX15	ILMN_2168449	ENSG00000109606	DEAH-box helicase 15
DHX33	ILMN_1744308	ENSG00000005100	DEAH-box helicase 33
DHX34	ILMN_1747506	ENSG00000134815	DExH-box helicase 34
DHX9	ILMN_1656016	ENSG00000135829	DExH-box helicase 9
DIMT1	ILMN_1803312	ENSG00000086189	DIM1 rRNA methyltransferase and ribosome maturation factor
DIO2	ILMN_1737650	ENSG00000211448	iodothyronine deiodinase 2
DISC1	ILMN_1695871	ENSG00000162946	DISC1 scaffold protein
DIXDC1	ILMN_2375830	ENSG00000150764	DIX domain containing 1
DIXDC1	ILMN_1736704	ENSG00000150764	DIX domain containing 1
DLEU2L	ILMN_2143011	ENSG00000116652	deleted in lymphocytic leukemia 2 like
DMD	ILMN_2381286	ENSG00000198947	dystrophin
DMRT3	ILMN_1687220	ENSG00000064218	doublesex and mab-3 related transcription factor 3
DMTN	ILMN_1671686	ENSG00000158856	dematin actin binding protein
DNAJA1	ILMN_1672496	ENSG00000086061	DnaJ heat shock protein family (Hsp40) member A1
DNAJA4	ILMN_1776998	ENSG00000140403	DnaJ heat shock protein family (Hsp40) member A4
DNAJB1	ILMN_1775304	ENSG00000132002	DnaJ heat shock protein family (Hsp40) member B1
DNAJB12	ILMN_2333865	ENSG00000148719	DnaJ heat shock protein family (Hsp40) member B12
DNAJB4	ILMN_2222317	ENSG00000162616	DnaJ heat shock protein family (Hsp40) member B4
DNAJB5	ILMN_1663722	ENSG00000137094	DnaJ heat shock protein family (Hsp40) member B5
DNAJB6	ILMN_2402416	ENSG00000105993	DnaJ heat shock protein family (Hsp40) member B6
DNAJB6	ILMN_1793770	ENSG00000105993	DnaJ heat shock protein family (Hsp40) member B6
DNAJB9	ILMN_1773742	ENSG00000128590	DnaJ heat shock protein family (Hsp40) member B9
DNAJC21	ILMN_1714563	ENSG00000168724	DnaJ heat shock protein family (Hsp40) member C21
DNAJC27	ILMN_1810436	ENSG00000115137	DnaJ heat shock protein family (Hsp40) member C27
DNM1L	ILMN_1724826	ENSG00000087470	dynamin 1 like
DNM1L	ILMN_2286800	ENSG00000087470	dynamin 1 like
DNAAF11	ILMN_1739683	ENSG00000129295	dynein axonemal assembly factor 11
DNAAF4-CCPG1	ILMN_2409290	ENSG00000261771	DNAAF4-CCPG1 readthrough (NMD candidate)
DNAAF4-CCPG1	ILMN_1794190	ENSG00000261771	DNAAF4-CCPG1 readthrough (NMD candidate)
DOC2B	ILMN_1718401	ENSG00000272636	double C2 domain beta
DOCK11	ILMN_1765860	ENSG00000147251	dedicator of cytokinesis 11
DOCK6	ILMN_1801226	ENSG00000130158	dedicator of cytokinesis 6
DOK5	ILMN_1728572	ENSG00000101134	docking protein 5
DOT1L	ILMN_1693559	ENSG00000104885	DOT1 like histone lysine methyltransferase
DPAGT1	ILMN_2200331	ENSG00000172269	dolichyl-phosphate N-acetylglucosaminephosphotransferase 1
DPAGT1	ILMN_1744244	ENSG00000172269	dolichyl-phosphate N-acetylglucosaminephosphotransferase 1
DPEP3	ILMN_1731275	ENSG00000141096	dipeptidase 3
DPH2	ILMN_2375418	ENSG00000132768	diphthamide biosynthesis 2
DPH2	ILMN_2276431	ENSG00000132768	diphthamide biosynthesis 2
DPH3	ILMN_1679912	ENSG00000154813	diphthamide biosynthesis 3
DPH3	ILMN_2349610	ENSG00000154813	diphthamide biosynthesis 3
DPH3	ILMN_2261973	ENSG00000154813	diphthamide biosynthesis 3
DPY30	ILMN_1741599	ENSG00000162961	dpy-30 histone methyltransferase complex regulatory subunit
DUS4L-BCAP29	ILMN_1715928	ENSG00000288558	DUS4L-BCAP29 readthrough
DUS4L-BCAP29	ILMN_1697642	ENSG00000288558	DUS4L-BCAP29 readthrough
DUS4L-BCAP29	ILMN_2342084	ENSG00000288558	DUS4L-BCAP29 readthrough
DUSP1	ILMN_1781285	ENSG00000120129	dual specificity phosphatase 1
DUSP10	ILMN_1759175	ENSG00000143507	dual specificity phosphatase 10
DUSP14	ILMN_1666546	ENSG00000276023	dual specificity phosphatase 14
DUSP16	ILMN_1764361	ENSG00000111266	dual specificity phosphatase 16
DUSP2	ILMN_1712959	ENSG00000158050	dual specificity phosphatase 2
DUSP3	ILMN_1797522	ENSG00000108861	dual specificity phosphatase 3
DUSP5	ILMN_1656501	ENSG00000138166	dual specificity phosphatase 5
DUSP6	ILMN_2396020	ENSG00000139318	dual specificity phosphatase 6
DUSP6	ILMN_1677466	ENSG00000139318	dual specificity phosphatase 6
DYNC1I1	ILMN_1690397	ENSG00000158560	dynein cytoplasmic 1 intermediate chain 1
DYNLL1	ILMN_2300186	ENSG00000088986	dynein light chain LC8-type 1
DYNLL2	ILMN_1772796	ENSG00000264364	dynein light chain LC8-type 2
DYNLT5	ILMN_1751868	ENSG00000152760	dynein light chain Tctex-type family member 5
DYRK1A	ILMN_1660663	ENSG00000157540	dual specificity tyrosine phosphorylation regulated kinase 1A
DYRK3	ILMN_2400322	ENSG00000143479	dual specificity tyrosine phosphorylation regulated kinase 3
DYRK3	ILMN_2400326	ENSG00000143479	dual specificity tyrosine phosphorylation regulated kinase 3
DYSF	ILMN_1810420	ENSG00000135636	dysferlin
E2F3	ILMN_1669502	ENSG00000112242	E2F transcription factor 3
E2F6	ILMN_1656196	ENSG00000169016	E2F transcription factor 6
E2F6P1	ILMN_1656196	ENSG00000234764	E2F transcription factor 6 pseudogene 1
E2F6P2	ILMN_1656196	ENSG00000224688	E2F transcription factor 6 pseudogene 2
E2F6P3	ILMN_1656196	ENSG00000226885	E2F transcription factor 6 pseudogene 3
EAF1	ILMN_1685012	ENSG00000144597	ELL associated factor 1
EBNA1BP2	ILMN_1768127	ENSG00000117395	EBNA1 binding protein 2
ECD	ILMN_2206645	ENSG00000122882	ecdysoneless cell cycle regulator
EDNRB	ILMN_1751904	ENSG00000136160	endothelin receptor type B
EEA1	ILMN_1743194	ENSG00000102189	early endosome antigen 1
EEF1AKMT4	ILMN_1762883	ENSG00000284753	EEF1A lysine methyltransferase 4
EEF1B2	ILMN_1701930	ENSG00000114942	eukaryotic translation elongation factor 1 beta 2
EFHD2	ILMN_1761463	ENSG00000142634	EF-hand domain family member D2
EFNB2	ILMN_1703852	ENSG00000125266	ephrin B2
EGFL6	ILMN_2057479	ENSG00000198759	EGF like domain multiple 6
EGFL8	ILMN_1693515	ENSG00000241404	EGF like domain multiple 8
EGLN1	ILMN_1749892	ENSG00000135766	egl-9 family hypoxia inducible factor 1
EGR1	ILMN_1762899	ENSG00000120738	early growth response 1
EGR3	ILMN_1722781	ENSG00000179388	early growth response 3
EHD1	ILMN_1651832	ENSG00000110047	EH domain containing 1
EHD4	ILMN_1720083	ENSG00000103966	EH domain containing 4
EHHADH	ILMN_1701507	ENSG00000113790	enoyl-CoA hydratase and 3-hydroxyacyl CoA dehydrogenase
EID2	ILMN_1704472	ENSG00000176396	EP300 interacting inhibitor of differentiation 2
EID3	ILMN_1776000	ENSG00000255150	EP300 interacting inhibitor of differentiation 3
EIF1	ILMN_1803846	ENSG00000173812	eukaryotic translation initiation factor 1
EIF1B	ILMN_1679324	ENSG00000114784	eukaryotic translation initiation factor 1B
EIF2S1	ILMN_1739821	ENSG00000134001	eukaryotic translation initiation factor 2 subunit alpha
EIF3I	ILMN_1671291	ENSG00000084623	eukaryotic translation initiation factor 3 subunit I
EIF3J	ILMN_1815345	ENSG00000104131	eukaryotic translation initiation factor 3 subunit J
EIF4A1	ILMN_1722900	ENSG00000161960	eukaryotic translation initiation factor 4A1
EIF4A3	ILMN_1667043	ENSG00000141543	eukaryotic translation initiation factor 4A3
EIF4G1	ILMN_1768470	ENSG00000114867	eukaryotic translation initiation factor 4 gamma 1
EIF4G1	ILMN_2370772	ENSG00000114867	eukaryotic translation initiation factor 4 gamma 1
EIF4G2	ILMN_2380946	ENSG00000110321	eukaryotic translation initiation factor 4 gamma 2
EIF4G2	ILMN_1761519	ENSG00000110321	eukaryotic translation initiation factor 4 gamma 2
EIF4G2	ILMN_2279635	ENSG00000110321	eukaryotic translation initiation factor 4 gamma 2
EIF5	ILMN_2318430	ENSG00000100664	eukaryotic translation initiation factor 5
EIF5	ILMN_1815733	ENSG00000100664	eukaryotic translation initiation factor 5
EIF5	ILMN_1657769	ENSG00000100664	eukaryotic translation initiation factor 5
ELF1	ILMN_1664010	ENSG00000120690	E74 like ETS transcription factor 1
ELF2	ILMN_2252295	ENSG00000109381	E74 like ETS transcription factor 2
ELF4	ILMN_1652082	ENSG00000102034	E74 like ETS transcription factor 4
ELK3	ILMN_1692335	ENSG00000111145	ETS transcription factor ELK3
ELK4	ILMN_1771805	ENSG00000158711	ETS transcription factor ELK4
ELL	ILMN_1736048	ENSG00000105656	elongation factor for RNA polymerase II
ELMO1	ILMN_1784320	ENSG00000155849	engulfment and cell motility 1
ELMO1	ILMN_1663627	ENSG00000155849	engulfment and cell motility 1
ELOA	ILMN_1808110	ENSG00000011007	elongin A
ELOC	ILMN_2066020	ENSG00000154582	elongin C
EMC6	ILMN_2405592	ENSG00000127774	ER membrane protein complex subunit 6
EMC6	ILMN_1794560	ENSG00000127774	ER membrane protein complex subunit 6
EMP1	ILMN_1801616	ENSG00000134531	epithelial membrane protein 1
ENDOU	ILMN_2095908	ENSG00000111405	endonuclease, poly(U) specific
ENPP4	ILMN_1781761	ENSG00000001561	ectonucleotide pyrophosphatase/phosphodiesterase 4
ENY2	ILMN_2166865	ENSG00000120533	ENY2 transcription and export complex 2 subunit
EOGT	ILMN_2136455	ENSG00000163378	EGF domain specific O-linked N-acetylglucosamine transferase
EPAS1	ILMN_1704753	ENSG00000116016	endothelial PAS domain protein 1
EPB41L4B	ILMN_1784967	ENSG00000095203	erythrocyte membrane protein band 4.1 like 4B
EPB42	ILMN_1814397	ENSG00000166947	erythrocyte membrane protein band 4.2
EPCAM	ILMN_2160209	ENSG00000119888	epithelial cell adhesion molecule
EPDR1	ILMN_1675797	ENSG00000086289	ependymin related 1
EPHA10	ILMN_1663263	ENSG00000183317	EPH receptor A10
EPHA2	ILMN_1699354	ENSG00000142627	EPH receptor A2
EPHA4	ILMN_1672022	ENSG00000116106	EPH receptor A4
EREG	ILMN_1657248	ENSG00000124882	epiregulin
ERF	ILMN_1652749	ENSG00000105722	ETS2 repressor factor
ERICH1	ILMN_2104696	ENSG00000104714	glutamate rich 1
ERN1	ILMN_1698404	ENSG00000178607	endoplasmic reticulum to nucleus signaling 1
ERRFI1	ILMN_1665510	ENSG00000116285	ERBB receptor feedback inhibitor 1
ESAM	ILMN_1668092	ENSG00000149564	endothelial cell adhesion molecule
ESM1	ILMN_2212878	ENSG00000164283	endothelial cell specific molecule 1
ESPL1	ILMN_1742145	ENSG00000135476	extra spindle pole bodies like 1, separase
ETF1	ILMN_2222992	ENSG00000120705	eukaryotic translation termination factor 1
ETNK1	ILMN_2244547	ENSG00000139163	ethanolamine kinase 1
ETNK1	ILMN_2316778	ENSG00000139163	ethanolamine kinase 1
ETNK1	ILMN_1696028	ENSG00000139163	ethanolamine kinase 1
ETS1	ILMN_2122103	ENSG00000134954	ETS proto-oncogene 1, transcription factor
ETS2	ILMN_1720158	ENSG00000157557	ETS proto-oncogene 2, transcription factor
ETV3	ILMN_1703180	ENSG00000117036	ETS variant transcription factor 3
EVA1C	ILMN_1695959	ENSG00000166979	eva-1 homolog C
EXD2	ILMN_1771689	ENSG00000081177	exonuclease 3'-5' domain containing 2
EXOG	ILMN_1709747	ENSG00000157036	exo/endonuclease G
EXOSC3	ILMN_1734194	ENSG00000107371	exosome component 3
EZH2	ILMN_2364529	ENSG00000106462	enhancer of zeste 2 polycomb repressive complex 2 subunit
EZR	ILMN_1795937	ENSG00000092820	ezrin
F5	ILMN_1709233	ENSG00000198734	coagulation factor V
FADS3	ILMN_2098643	ENSG00000221968	fatty acid desaturase 3
FAM107A	ILMN_1743445	ENSG00000168309	family with sequence similarity 107 member A
FAM107B	ILMN_1758672	ENSG00000065809	family with sequence similarity 107 member B
FAM110D	ILMN_2116299	ENSG00000197245	family with sequence similarity 110 member D
FAM131A	ILMN_1729217	ENSG00000175182	family with sequence similarity 131 member A
FAM131B	ILMN_1652694	ENSG00000159784	family with sequence similarity 131 member B
FAM177A1	ILMN_2287276	ENSG00000151327	family with sequence similarity 177 member A1
FAM177A1	ILMN_1763603	ENSG00000151327	family with sequence similarity 177 member A1
FAM199X	ILMN_1811121	ENSG00000123575	family with sequence similarity 199, X-linked
FAM210A	ILMN_1658110	ENSG00000177150	family with sequence similarity 210 member A
FAM234B	ILMN_1668619	ENSG00000084444	family with sequence similarity 234 member B
FAM43A	ILMN_1706015	ENSG00000185112	family with sequence similarity 43 member A
FAM53C	ILMN_1744508	ENSG00000120709	family with sequence similarity 53 member C
FAM91A1	ILMN_1777322	ENSG00000176853	family with sequence similarity 91 member A1
FANCB	ILMN_1726756	ENSG00000181544	FA complementation group B
FAR2	ILMN_2202915	ENSG00000064763	fatty acyl-CoA reductase 2
FASTKD5	ILMN_1733377	ENSG00000215251	FAST kinase domains 5
FAT1	ILMN_1754795	ENSG00000083857	FAT atypical cadherin 1
FBXL20	ILMN_1754489	ENSG00000108306	F-box and leucine rich repeat protein 20
FBXO11	ILMN_1733164	ENSG00000138081	F-box protein 11
FBXO22	ILMN_1786469	ENSG00000167196	F-box protein 22
FBXO28	ILMN_2045911	ENSG00000143756	F-box protein 28
FBXO30	ILMN_2168992	ENSG00000118496	F-box protein 30
FBXO34	ILMN_1765060	ENSG00000178974	F-box protein 34
FBXO7	ILMN_1715963	ENSG00000100225	F-box protein 7
FBXO7	ILMN_1667112	ENSG00000100225	F-box protein 7
FBXW7	ILMN_1754279	ENSG00000109670	F-box and WD repeat domain containing 7
FBXW7	ILMN_1668634	ENSG00000109670	F-box and WD repeat domain containing 7
FBXW7	ILMN_1655906	ENSG00000109670	F-box and WD repeat domain containing 7
FCAR	ILMN_2379967	ENSG00000186431	Fc alpha receptor
FCAR	ILMN_2365091	ENSG00000186431	Fc alpha receptor
FCGR1A	ILMN_2391051	ENSG00000150337	Fc gamma receptor Ia
FCGR1BP	ILMN_2391051	ENSG00000291135	Fc gamma receptor Ib, pseudogene
FCGR2A	ILMN_2289849	ENSG00000143226	Fc gamma receptor IIa
FCN1	ILMN_1668063	ENSG00000085265	ficolin 1
FEM1A	ILMN_1719985	ENSG00000141965	fem-1 homolog A
FEM1B	ILMN_1744239	ENSG00000169018	fem-1 homolog B
FEM1C	ILMN_1703330	ENSG00000145780	fem-1 homolog C
FES	ILMN_1693650	ENSG00000182511	FES proto-oncogene, tyrosine kinase
FFAR2	ILMN_1797895	ENSG00000126262	free fatty acid receptor 2
FGD4	ILMN_1698728	ENSG00000139132	FYVE, RhoGEF and PH domain containing 4
FGF1	ILMN_2349982	ENSG00000113578	fibroblast growth factor 1
FGF13	ILMN_1690984	ENSG00000129682	fibroblast growth factor 13
FGF13	ILMN_1671777	ENSG00000129682	fibroblast growth factor 13
FGF18	ILMN_1693483	ENSG00000156427	fibroblast growth factor 18
FGF5	ILMN_2399100	ENSG00000138675	fibroblast growth factor 5
FGFR1	ILMN_1796229	ENSG00000077782	fibroblast growth factor receptor 1
FGFR1	ILMN_2398261	ENSG00000077782	fibroblast growth factor receptor 1
FGL2	ILMN_1693009	ENSG00000127951	fibrinogen like 2
FGR	ILMN_1795158	ENSG00000000938	FGR proto-oncogene, Src family tyrosine kinase
FGR	ILMN_2368318	ENSG00000000938	FGR proto-oncogene, Src family tyrosine kinase
FILIP1L	ILMN_1738578	ENSG00000168386	filamin A interacting protein 1 like
FILIP1L	ILMN_2391150	ENSG00000168386	filamin A interacting protein 1 like
FILIP1L	ILMN_1730906	ENSG00000168386	filamin A interacting protein 1 like
FJX1	ILMN_1746465	ENSG00000179431	four-jointed box kinase 1
FKBP1A	ILMN_1702237	ENSG00000088832	FKBP prolyl isomerase 1A
FKBP1A	ILMN_2333367	ENSG00000088832	FKBP prolyl isomerase 1A
FKBP1C	ILMN_2333367	ENSG00000198225	FKBP prolyl isomerase family member 1C
FKRP	ILMN_1753597	ENSG00000181027	fukutin related protein
FLOT1	ILMN_1661439	ENSG00000137312	flotillin 1
FMNL2	ILMN_1730491	ENSG00000157827	formin like 2
FNDC4	ILMN_1663032	ENSG00000115226	fibronectin type III domain containing 4
FOLR3	ILMN_1730454	ENSG00000110203	folate receptor gamma
FOS	ILMN_1669523	ENSG00000170345	Fos proto-oncogene, AP-1 transcription factor subunit
FOSB	ILMN_1751607	ENSG00000125740	FosB proto-oncogene, AP-1 transcription factor subunit
FOSL1	ILMN_1771841	ENSG00000175592	FOS like 1, AP-1 transcription factor subunit
FOSL2	ILMN_1725175	ENSG00000075426	FOS like 2, AP-1 transcription factor subunit
FOXC1	ILMN_1738401	ENSG00000054598	forkhead box C1
FOXH1	ILMN_1798808	ENSG00000160973	forkhead box H1
FOXK2	ILMN_2310685	ENSG00000141568	forkhead box K2
FOXO3	ILMN_1681703	ENSG00000118689	forkhead box O3
FPR1	ILMN_2092118	ENSG00000171051	formyl peptide receptor 1
FPR2	ILMN_1740875	ENSG00000171049	formyl peptide receptor 2
FPR2	ILMN_2392569	ENSG00000171049	formyl peptide receptor 2
FRS2	ILMN_2335893	ENSG00000166225	fibroblast growth factor receptor substrate 2
FST	ILMN_1712896	ENSG00000134363	follistatin
FSTL3	ILMN_1730670	ENSG00000070404	follistatin like 3
FTH1P7	ILMN_2234016	ENSG00000232187	ferritin heavy chain 1 pseudogene 7
FURIN	ILMN_1790228	ENSG00000140564	furin, paired basic amino acid cleaving enzyme
FUT1	ILMN_1712894	ENSG00000174951	fucosyltransferase 1 (H blood group)
FYN	ILMN_1781207	ENSG00000010810	FYN proto-oncogene, Src family tyrosine kinase
FYTTD1	ILMN_1683786	ENSG00000122068	forty-two-three domain containing 1
FYTTD1	ILMN_2389935	ENSG00000122068	forty-two-three domain containing 1
FZD5	ILMN_1798971	ENSG00000163251	frizzled class receptor 5
G3BP1	ILMN_2357809	ENSG00000145907	G3BP stress granule assembly factor 1
GABARAPL1	ILMN_2151281	ENSG00000139112	GABA type A receptor associated protein like 1
GABPB1	ILMN_1761147	ENSG00000104064	GA binding protein transcription factor subunit beta 1
GAD2	ILMN_1728301	ENSG00000136750	glutamate decarboxylase 2
GADD45A	ILMN_2052208	ENSG00000116717	growth arrest and DNA damage inducible alpha
GADD45B	ILMN_1718977	ENSG00000099860	growth arrest and DNA damage inducible beta
GAR1	ILMN_1749752	ENSG00000109534	GAR1 ribonucleoprotein
GAREM1	ILMN_1707553	ENSG00000141441	GRB2 associated regulator of MAPK1 subtype 1
GART	ILMN_1793220	ENSG00000159131	phosphoribosylglycinamide formyltransferase, phosphoribosylglycinamide synthetase, phosphoribosylaminoimidazole synthetase
GASK1B	ILMN_1761941	ENSG00000164125	golgi associated kinase 1B
GASK1B	ILMN_1672124	ENSG00000164125	golgi associated kinase 1B
GATAD2A	ILMN_1673682	ENSG00000167491	GATA zinc finger domain containing 2A
GBP1	ILMN_2148785	ENSG00000117228	guanylate binding protein 1
GCA	ILMN_1800602	ENSG00000115271	grancalcin
GCH1	ILMN_2335813	ENSG00000131979	GTP cyclohydrolase 1
GCH1	ILMN_1812759	ENSG00000131979	GTP cyclohydrolase 1
GCH1	ILMN_1788802	ENSG00000131979	GTP cyclohydrolase 1
GCLM	ILMN_2225974	ENSG00000023909	glutamate-cysteine ligase modifier subunit
GCOM1	ILMN_2368145	ENSG00000137878	GCOM1, MYZAP-POLR2M combined locus
GCOM1	ILMN_1674151	ENSG00000137878	GCOM1, MYZAP-POLR2M combined locus
GCOM1	ILMN_1675188	ENSG00000137878	GCOM1, MYZAP-POLR2M combined locus
GEM	ILMN_2367883	ENSG00000164949	GTP binding protein overexpressed in skeletal muscle
GEM	ILMN_1678968	ENSG00000164949	GTP binding protein overexpressed in skeletal muscle
GFPT2	ILMN_1709674	ENSG00000131459	glutamine-fructose-6-phosphate transaminase 2
GGCX	ILMN_1758232	ENSG00000115486	gamma-glutamyl carboxylase
GJA1	ILMN_1727087	ENSG00000152661	gap junction protein alpha 1
GJA4	ILMN_1671106	ENSG00000187513	gap junction protein alpha 4
GJA5	ILMN_1722753	ENSG00000265107	gap junction protein alpha 5
GK	ILMN_2393296	ENSG00000198814	glycerol kinase
GK4P	ILMN_2393296	ENSG00000178146	glycerol kinase 4 pseudogene
GLA	ILMN_1766637	ENSG00000102393	galactosidase alpha
GLB1	ILMN_2397721	ENSG00000170266	galactosidase beta 1
GLB1	ILMN_1735155	ENSG00000170266	galactosidase beta 1
GLRX	ILMN_1737308	ENSG00000173221	glutaredoxin
GLRX3	ILMN_2056479	ENSG00000108010	glutaredoxin 3
GLYAT	ILMN_1668510	ENSG00000149124	glycine-N-acyltransferase
GLYAT	ILMN_1811345	ENSG00000149124	glycine-N-acyltransferase
GMEB2	ILMN_1683204	ENSG00000101216	glucocorticoid modulatory element binding protein 2
GMFB	ILMN_2093674	ENSG00000197045	glia maturation factor beta
GNA12	ILMN_2216157	ENSG00000146535	G protein subunit alpha 12
GNA12	ILMN_1692191	ENSG00000146535	G protein subunit alpha 12
GNA13	ILMN_2176037	ENSG00000120063	G protein subunit alpha 13
GNA14	ILMN_1686227	ENSG00000156049	G protein subunit alpha 14
GNA15	ILMN_1773963	ENSG00000060558	G protein subunit alpha 15
GNAI3	ILMN_1696003	ENSG00000065135	G protein subunit alpha i3
GNE	ILMN_1729417	ENSG00000159921	glucosamine (UDP-N-acetyl)-2-epimerase/N-acetylmannosamine kinase
GNG10	ILMN_1757074	ENSG00000242616	G protein subunit gamma 10
GNG2	ILMN_1807925	ENSG00000186469	G protein subunit gamma 2
GNG5	ILMN_1701854	ENSG00000174021	G protein subunit gamma 5
GNL2	ILMN_1761113	ENSG00000134697	G protein nucleolar 2
GNL3	ILMN_2324056	ENSG00000163938	G protein nucleolar 3
GNL3	ILMN_1806106	ENSG00000163938	G protein nucleolar 3
GNL3	ILMN_1790659	ENSG00000163938	G protein nucleolar 3
GNRH2	ILMN_2354285	ENSG00000125787	gonadotropin releasing hormone 2
GOLPH3	ILMN_1708841	ENSG00000113384	golgi phosphoprotein 3
GOSR2	ILMN_1656293	ENSG00000108433	golgi SNAP receptor complex member 2
GPAT4	ILMN_1740752	ENSG00000158669	glycerol-3-phosphate acyltransferase 4
GPATCH2L	ILMN_2265093	ENSG00000089916	G-patch domain containing 2 like
GPATCH4	ILMN_2383305	ENSG00000160818	G-patch domain containing 4 (gene/pseudogene)
GPATCH4	ILMN_2281069	ENSG00000160818	G-patch domain containing 4 (gene/pseudogene)
GPBAR1	ILMN_1727709	ENSG00000179921	G protein-coupled bile acid receptor 1
GPBAR1	ILMN_2316386	ENSG00000179921	G protein-coupled bile acid receptor 1
GPC1	ILMN_1801516	ENSG00000063660	glypican 1
GPCPD1	ILMN_1701111	ENSG00000125772	glycerophosphocholine phosphodiesterase 1
GPLD1	ILMN_1765419	ENSG00000112293	glycosylphosphatidylinositol specific phospholipase D1
GPN2	ILMN_2205245	ENSG00000142751	GPN-loop GTPase 2
GPR132	ILMN_1811171	ENSG00000183484	G protein-coupled receptor 132
GPR135	ILMN_2054271	ENSG00000181619	G protein-coupled receptor 135
GPR183	ILMN_2168217	ENSG00000169508	G protein-coupled receptor 183
GPR3	ILMN_1725271	ENSG00000181773	G protein-coupled receptor 3
GPR4	ILMN_2074477	ENSG00000177464	G protein-coupled receptor 4
GPR42	ILMN_2135898	ENSG00000126251	G protein-coupled receptor 42
GPR75	ILMN_1772727	ENSG00000119737	G protein-coupled receptor 75
GPR84	ILMN_1785345	ENSG00000139572	G protein-coupled receptor 84
GPRC5A	ILMN_1682599	ENSG00000013588	G protein-coupled receptor class C group 5 member A
GPX1	ILMN_1749662	ENSG00000233276	glutathione peroxidase 1
GPX1P1	ILMN_1749662	ENSG00000197582	glutathione peroxidase pseudogene 1
GRAMD1A	ILMN_1737157	ENSG00000089351	GRAM domain containing 1A
GRB14	ILMN_2413816	ENSG00000115290	growth factor receptor bound protein 14
GRB2	ILMN_1748797	ENSG00000177885	growth factor receptor bound protein 2
GRHL1	ILMN_1795767	ENSG00000134317	grainyhead like transcription factor 1
GRHL1	ILMN_1769934	ENSG00000134317	grainyhead like transcription factor 1
GRHL1	ILMN_1651286	ENSG00000134317	grainyhead like transcription factor 1
GRPEL1	ILMN_1670817	ENSG00000109519	GrpE like 1, mitochondrial
GRWD1	ILMN_1742166	ENSG00000105447	glutamate rich WD repeat containing 1
GSK3B	ILMN_1779376	ENSG00000082701	glycogen synthase kinase 3 beta
GTF2B	ILMN_1737857	ENSG00000137947	general transcription factor IIB
GTPBP4	ILMN_1742577	ENSG00000107937	GTP binding protein 4
GUCY1A2	ILMN_1720496	ENSG00000152402	guanylate cyclase 1 soluble subunit alpha 2
H1-2	ILMN_1757406	ENSG00000187837	H1.2 linker histone, cluster member
H2AC18	ILMN_2144426	ENSG00000288825	H2A clustered histone 18
H2AC19	ILMN_2144426	ENSG00000288859	H2A clustered histone 19
H2AC20	ILMN_1768973	ENSG00000184260	H2A clustered histone 20
H2AC6	ILMN_1792689	ENSG00000180573	H2A clustered histone 6
H2AX	ILMN_2200331	ENSG00000188486	H2A.X variant histone
H2AZ1	ILMN_1707858	ENSG00000164032	H2A.Z variant histone 1
H2BC12	ILMN_1813314	ENSG00000197903	H2B clustered histone 12
H2BC12L	ILMN_1813314	ENSG00000234289	H2B clustered histone 12 like
H2BC21	ILMN_1732071	ENSG00000184678	H2B clustered histone 21
H2BC4	ILMN_1680937	ENSG00000180596	H2B clustered histone 4
H2BC5	ILMN_1758623	ENSG00000158373	H2B clustered histone 5
H2BC5	ILMN_1651496	ENSG00000158373	H2B clustered histone 5
H2BC6	ILMN_1687947	ENSG00000274290	H2B clustered histone 6
H2BC6	ILMN_1651496	ENSG00000274290	H2B clustered histone 6
H4C2	ILMN_2165369	ENSG00000278705	H4 clustered histone 2
H4C5	ILMN_1681542	ENSG00000276966	H4 clustered histone 5
H4C8	ILMN_1751120	ENSG00000158406	H4 clustered histone 8
HAGH	ILMN_2379520	ENSG00000063854	hydroxyacylglutathione hydrolase
HAL	ILMN_2074748	ENSG00000084110	histidine ammonia-lyase
HAPLN3	ILMN_1654319	ENSG00000140511	hyaluronan and proteoglycan link protein 3
HAPSTR1	ILMN_1773407	ENSG00000182831	HUWE1 associated protein modifying stress responses
HAS1	ILMN_1754716	ENSG00000105509	hyaluronan synthase 1
HAS2	ILMN_1792978	ENSG00000170961	hyaluronan synthase 2
HAT1	ILMN_1693905	ENSG00000128708	histone acetyltransferase 1
HAUS8	ILMN_2365528	ENSG00000131351	HAUS augmin like complex subunit 8
HBB	ILMN_2100437	ENSG00000244734	hemoglobin subunit beta
HBD	ILMN_1815527	ENSG00000223609	hemoglobin subunit delta
HBEGF	ILMN_2121408	ENSG00000113070	heparin binding EGF like growth factor
HBG1	ILMN_1796678	ENSG00000213934	hemoglobin subunit gamma 1
HBG2	ILMN_2084825	ENSG00000196565	hemoglobin subunit gamma 2
HBM	ILMN_2091454	ENSG00000206177	hemoglobin subunit mu
HBQ1	ILMN_1696183	ENSG00000086506	hemoglobin subunit theta 1
HCAR2	ILMN_1750497	ENSG00000182782	hydroxycarboxylic acid receptor 2
HCAR3	ILMN_1677693	ENSG00000255398	hydroxycarboxylic acid receptor 3
HDGFL1	ILMN_2189314	ENSG00000112273	HDGF like 1
HDGFL3	ILMN_1784256	ENSG00000166503	HDGF like 3
HDLBP	ILMN_1678252	ENSG00000115677	high density lipoprotein binding protein
HEATR1	ILMN_1787762	ENSG00000119285	HEAT repeat containing 1
HECW2	ILMN_1775268	ENSG00000138411	HECT, C2 and WW domain containing E3 ubiquitin protein ligase 2
HELZ2	ILMN_1787509	ENSG00000130589	helicase with zinc finger 2
HES1	ILMN_1710284	ENSG00000114315	hes family bHLH transcription factor 1
HES4	ILMN_1653466	ENSG00000188290	hes family bHLH transcription factor 4
HEYL	ILMN_1654324	ENSG00000163909	hes related family bHLH transcription factor with YRPW motif like
HIBCH	ILMN_1656977	ENSG00000198130	3-hydroxyisobutyryl-CoA hydrolase
HIC2	ILMN_1652762	ENSG00000169635	HIC ZBTB transcriptional repressor 2
HIF1A	ILMN_2379788	ENSG00000100644	hypoxia inducible factor 1 subunit alpha
HIF1A	ILMN_1763260	ENSG00000100644	hypoxia inducible factor 1 subunit alpha
HIGD1A	ILMN_1661799	ENSG00000181061	HIG1 hypoxia inducible domain family member 1A
HIGD1AP1	ILMN_1661799	ENSG00000258016	HIG1 hypoxia inducible domain family member 1A pseudogene 1
HIP1	ILMN_1701403	ENSG00000127946	huntingtin interacting protein 1
HIPK2	ILMN_1687440	ENSG00000064393	homeodomain interacting protein kinase 2
HIPK3	ILMN_2337551	ENSG00000110422	homeodomain interacting protein kinase 3
HIPK3	ILMN_1746941	ENSG00000110422	homeodomain interacting protein kinase 3
HIVEP1	ILMN_1735548	ENSG00000095951	HIVEP zinc finger 1
HK1	ILMN_2382990	ENSG00000156515	hexokinase 1
HK1	ILMN_1761829	ENSG00000156515	hexokinase 1
HLX	ILMN_2087646	ENSG00000136630	H2.0 like homeobox
HMBS	ILMN_1685954	ENSG00000256269	hydroxymethylbilane synthase
HMGA1	ILMN_2311537	ENSG00000137309	high mobility group AT-hook 1
HMGA1P2	ILMN_2311537	ENSG00000248641	high mobility group AT-hook 1 pseudogene 2
HMGB1P3	ILMN_1690920	ENSG00000250011	high mobility group box 1 pseudogene 3
HMOX1	ILMN_1800512	ENSG00000100292	heme oxygenase 1
HNRNPAB	ILMN_1651262	ENSG00000197451	heterogeneous nuclear ribonucleoprotein A/B
HNRNPAB	ILMN_2335718	ENSG00000197451	heterogeneous nuclear ribonucleoprotein A/B
HNRNPAB	ILMN_1696485	ENSG00000197451	heterogeneous nuclear ribonucleoprotein A/B
HNRNPF	ILMN_1668179	ENSG00000169813	heterogeneous nuclear ribonucleoprotein F
HNRNPM	ILMN_1805371	ENSG00000099783	heterogeneous nuclear ribonucleoprotein M
HOMER1	ILMN_1804568	ENSG00000152413	homer scaffold protein 1
HOXC4	ILMN_1757184	ENSG00000198353	homeobox C4
HPCAL1	ILMN_1715672	ENSG00000115756	hippocalcin like 1
HPRT1	ILMN_2056975	ENSG00000165704	hypoxanthine phosphoribosyltransferase 1
HSD11B1	ILMN_2389506	ENSG00000117594	hydroxysteroid 11-beta dehydrogenase 1
HSD11B1	ILMN_1811370	ENSG00000117594	hydroxysteroid 11-beta dehydrogenase 1
HSD11B1	ILMN_2389501	ENSG00000117594	hydroxysteroid 11-beta dehydrogenase 1
HSF1	ILMN_1667060	ENSG00000185122	heat shock transcription factor 1
HSP90AA1	ILMN_2373515	ENSG00000080824	heat shock protein 90 alpha family class A member 1
HSPA12A	ILMN_2081087	ENSG00000165868	heat shock protein family A (Hsp70) member 12A
HSPA1A	ILMN_1789074	ENSG00000204389	heat shock protein family A (Hsp70) member 1A
HSPA1B	ILMN_1660436	ENSG00000204388	heat shock protein family A (Hsp70) member 1B
HSPA4	ILMN_2395043	ENSG00000170606	heat shock protein family A (Hsp70) member 4
HSPA4	ILMN_1755134	ENSG00000170606	heat shock protein family A (Hsp70) member 4
HSPA8	ILMN_2413084	ENSG00000109971	heat shock protein family A (Hsp70) member 8
HSPA8	ILMN_1686367	ENSG00000109971	heat shock protein family A (Hsp70) member 8
HSPA9	ILMN_1679209	ENSG00000113013	heat shock protein family A (Hsp70) member 9
HSPB8	ILMN_1791280	ENSG00000152137	heat shock protein family B (small) member 8
HSPD1	ILMN_2381397	ENSG00000144381	heat shock protein family D (Hsp60) member 1
HSPD1	ILMN_1784367	ENSG00000144381	heat shock protein family D (Hsp60) member 1
HSPH1	ILMN_1712888	ENSG00000120694	heat shock protein family H (Hsp110) member 1
HYAL2	ILMN_1668283	ENSG00000068001	hyaluronidase 2
ICAM1	ILMN_1812226	ENSG00000090339	intercellular adhesion molecule 1
ICAM2	ILMN_1786823	ENSG00000108622	intercellular adhesion molecule 2
ICAM3	ILMN_2212763	ENSG00000076662	intercellular adhesion molecule 3
ICAM4	ILMN_1681296	ENSG00000105371	intercellular adhesion molecule 4 (Landsteiner-Wiener blood group)
ID2	ILMN_2086095	ENSG00000115738	inhibitor of DNA binding 2
ID3	ILMN_1732296	ENSG00000117318	inhibitor of DNA binding 3
IDH3A	ILMN_1698533	ENSG00000166411	isocitrate dehydrogenase (NAD(+)) 3 catalytic subunit alpha
IDI1	ILMN_1755075	ENSG00000067064	isopentenyl-diphosphate delta isomerase 1
IDO1	ILMN_1656310	ENSG00000131203	indoleamine 2,3-dioxygenase 1
IDS	ILMN_1758626	ENSG00000010404	iduronate 2-sulfatase
IDS	ILMN_1815445	ENSG00000010404	iduronate 2-sulfatase
IER2	ILMN_1700584	ENSG00000160888	immediate early response 2
IER3	ILMN_1682717	ENSG00000137331	immediate early response 3
IER5	ILMN_1721833	ENSG00000162783	immediate early response 5
IFI16	ILMN_1710937	ENSG00000163565	interferon gamma inducible protein 16
IFIT1B	ILMN_1759155	ENSG00000204010	interferon induced protein with tetratricopeptide repeats 1B
IFIT3	ILMN_1664543	ENSG00000119917	interferon induced protein with tetratricopeptide repeats 3
IFIT3	ILMN_1701789	ENSG00000119917	interferon induced protein with tetratricopeptide repeats 3
IFITM2	ILMN_1673352	ENSG00000185201	interferon induced transmembrane protein 2
IFITM3	ILMN_1805750	ENSG00000142089	interferon induced transmembrane protein 3
IFNAR1	ILMN_1752923	ENSG00000142166	interferon alpha and beta receptor subunit 1
IFNAR2	ILMN_1791057	ENSG00000159110	interferon alpha and beta receptor subunit 2
IFRD1	ILMN_1667561	ENSG00000006652	interferon related developmental regulator 1
IFRD2	ILMN_1742031	ENSG00000214706	interferon related developmental regulator 2
IFT43	ILMN_1756877	ENSG00000119650	intraflagellar transport 43
IGSF1	ILMN_1679299	ENSG00000147255	immunoglobulin superfamily member 1
IGSF21	ILMN_1730039	ENSG00000117154	immunoglobin superfamily member 21
IL15	ILMN_2273053	ENSG00000164136	interleukin 15
IL15	ILMN_2369221	ENSG00000164136	interleukin 15
IL18RAP	ILMN_1721762	ENSG00000115607	interleukin 18 receptor accessory protein
IL1A	ILMN_1658483	ENSG00000115008	interleukin 1 alpha
IL1B	ILMN_1775501	ENSG00000125538	interleukin 1 beta
IL1R1	ILMN_1810584	ENSG00000115594	interleukin 1 receptor type 1
IL1R2	ILMN_1772131	ENSG00000115590	interleukin 1 receptor type 2
IL1RAP	ILMN_1686884	ENSG00000196083	interleukin 1 receptor accessory protein
IL1RAP	ILMN_2357062	ENSG00000196083	interleukin 1 receptor accessory protein
IL1RL1	ILMN_2313672	ENSG00000115602	interleukin 1 receptor like 1
IL1RL1	ILMN_2242900	ENSG00000115602	interleukin 1 receptor like 1
IL1RL2	ILMN_1762810	ENSG00000115598	interleukin 1 receptor like 2
IL1RN	ILMN_1689734	ENSG00000136689	interleukin 1 receptor antagonist
IL27RA	ILMN_1688152	ENSG00000104998	interleukin 27 receptor subunit alpha
IL3RA	ILMN_1747344	ENSG00000185291	interleukin 3 receptor subunit alpha
IL3RA	ILMN_1747344	ENSG00000292332	interleukin 3 receptor subunit alpha
IL4R	ILMN_1652185	ENSG00000077238	interleukin 4 receptor
IL5RA	ILMN_1756455	ENSG00000091181	interleukin 5 receptor subunit alpha
IL6	ILMN_1699651	ENSG00000136244	interleukin 6
IL6R	ILMN_1754753	ENSG00000160712	interleukin 6 receptor
IL6R	ILMN_1696394	ENSG00000160712	interleukin 6 receptor
IL6ST	ILMN_1746604	ENSG00000134352	interleukin 6 cytokine family signal transducer
ILF2	ILMN_1745172	ENSG00000143621	interleukin enhancer binding factor 2
ILRUN	ILMN_1757723	ENSG00000196821	inflammation and lipid regulator with UBA-like and NBR1-like domains
INF2	ILMN_1729596	ENSG00000203485	inverted formin 2
ING5	ILMN_2292748	ENSG00000168395	inhibitor of growth family member 5
INHBB	ILMN_1685714	ENSG00000163083	inhibin subunit beta B
INKA2	ILMN_1797301	ENSG00000197852	inka box actin regulator 2
INO80C	ILMN_1730294	ENSG00000153391	INO80 complex subunit C
INPP1	ILMN_1667239	ENSG00000151689	inositol polyphosphate-1-phosphatase
INPP4A	ILMN_1652647	ENSG00000040933	inositol polyphosphate-4-phosphatase type I A
INSIG1	ILMN_1686989	ENSG00000186480	insulin induced gene 1
INSYN1	ILMN_2141118	ENSG00000205363	inhibitory synaptic factor 1
INTS6	ILMN_1655557	ENSG00000102786	integrator complex subunit 6
INTS6	ILMN_2312304	ENSG00000102786	integrator complex subunit 6
INTS7	ILMN_1718354	ENSG00000143493	integrator complex subunit 7
INVS	ILMN_2360184	ENSG00000119509	inversin
IPO11	ILMN_1684746	ENSG00000086200	importin 11
IPO4	ILMN_1798172	ENSG00000196497	importin 4
IPO7	ILMN_1652378	ENSG00000205339	importin 7
IPO7P2	ILMN_1652378	ENSG00000225674	importin 7 pseudogene 2
IPPK	ILMN_1732873	ENSG00000127080	inositol-pentakisphosphate 2-kinase
IQCJ-SCHIP1	ILMN_1794598	ENSG00000283154	IQCJ-SCHIP1 readthrough
IRAK2	ILMN_1745964	ENSG00000134070	interleukin 1 receptor associated kinase 2
IRAK3	ILMN_1661695	ENSG00000090376	interleukin 1 receptor associated kinase 3
IRF1	ILMN_1708375	ENSG00000125347	interferon regulatory factor 1
IRF7	ILMN_2349061	ENSG00000185507	interferon regulatory factor 7
IRF7	ILMN_1798181	ENSG00000185507	interferon regulatory factor 7
IRF8	ILMN_1666594	ENSG00000140968	interferon regulatory factor 8
ISG20	ILMN_1659913	ENSG00000172183	interferon stimulated exonuclease gene 20
ISG20L2	ILMN_2090397	ENSG00000143319	interferon stimulated exonuclease gene 20 like 2
ITGA1	ILMN_1802411	ENSG00000213949	integrin subunit alpha 1
ITGA5	ILMN_1792679	ENSG00000161638	integrin subunit alpha 5
ITGAV	ILMN_2169439	ENSG00000138448	integrin subunit alpha V
ITGB1	ILMN_1723467	ENSG00000150093	integrin subunit beta 1
ITGB1	ILMN_2383934	ENSG00000150093	integrin subunit beta 1
ITGB1P1	ILMN_2383934	ENSG00000269378	integrin subunit beta 1 pseudogene 1
ITGB5	ILMN_2311166	ENSG00000082781	integrin subunit beta 5
ITGB5	ILMN_1668374	ENSG00000082781	integrin subunit beta 5
ITIH5	ILMN_2335557	ENSG00000123243	inter-alpha-trypsin inhibitor heavy chain 5
ITIH5	ILMN_1731862	ENSG00000123243	inter-alpha-trypsin inhibitor heavy chain 5
ITPK1	ILMN_1715674	ENSG00000100605	inositol-tetrakisphosphate 1-kinase
ITPKC	ILMN_1714945	ENSG00000086544	inositol-trisphosphate 3-kinase C
ITPR1	ILMN_1789505	ENSG00000150995	inositol 1,4,5-trisphosphate receptor type 1
ITPRIP	ILMN_1805192	ENSG00000148841	inositol 1,4,5-trisphosphate receptor interacting protein
IVNS1ABP	ILMN_1717877	ENSG00000116679	influenza virus NS1A binding protein
IVNS1ABP	ILMN_1715133	ENSG00000116679	influenza virus NS1A binding protein
IVNS1ABP	ILMN_2397750	ENSG00000116679	influenza virus NS1A binding protein
IWS1	ILMN_1747241	ENSG00000163166	interacts with SUPT6H, CTD assembly factor 1
JADE1	ILMN_1655194	ENSG00000077684	jade family PHD finger 1
JADE1	ILMN_1794473	ENSG00000077684	jade family PHD finger 1
JAML	ILMN_1778723	ENSG00000160593	junction adhesion molecule like
JMJD1C	ILMN_1764970	ENSG00000171988	jumonji domain containing 1C
JMJD1C	ILMN_2410742	ENSG00000171988	jumonji domain containing 1C
JMJD6	ILMN_2412024	ENSG00000070495	jumonji domain containing 6, arginine demethylase and lysine hydroxylase
JOSD1	ILMN_1668535	ENSG00000100221	Josephin domain containing 1
JPH2	ILMN_1676247	ENSG00000149596	junctophilin 2
JPH2	ILMN_1717519	ENSG00000149596	junctophilin 2
JUN	ILMN_1806023	ENSG00000177606	Jun proto-oncogene, AP-1 transcription factor subunit
JUNB	ILMN_2086077	ENSG00000171223	JunB proto-oncogene, AP-1 transcription factor subunit
JUND	ILMN_1810214	ENSG00000130522	JunD proto-oncogene, AP-1 transcription factor subunit
KANK1	ILMN_1773427	ENSG00000107104	KN motif and ankyrin repeat domains 1
KAZN	ILMN_1798458	ENSG00000189337	kazrin, periplakin interacting protein
KAZN	ILMN_1680399	ENSG00000189337	kazrin, periplakin interacting protein
KBTBD2	ILMN_1784540	ENSG00000170852	kelch repeat and BTB domain containing 2
KBTBD8	ILMN_1716272	ENSG00000163376	kelch repeat and BTB domain containing 8
KCMF1	ILMN_1779480	ENSG00000176407	potassium channel modulatory factor 1
KCMF1	ILMN_1669669	ENSG00000176407	potassium channel modulatory factor 1
KCNAB1	ILMN_1696189	ENSG00000169282	potassium voltage-gated channel subfamily A regulatory beta subunit 1
KCNB1	ILMN_1711092	ENSG00000158445	potassium voltage-gated channel subfamily B member 1
KCNIP3	ILMN_2350823	ENSG00000115041	potassium voltage-gated channel interacting protein 3
KCNJ15	ILMN_1675756	ENSG00000157551	potassium inwardly rectifying channel subfamily J member 15
KCNJ15	ILMN_2396903	ENSG00000157551	potassium inwardly rectifying channel subfamily J member 15
KCNJ2	ILMN_1780334	ENSG00000123700	potassium inwardly rectifying channel subfamily J member 2
KCNN2	ILMN_1685636	ENSG00000080709	potassium calcium-activated channel subfamily N member 2
KDM2B	ILMN_1658232	ENSG00000089094	lysine demethylase 2B
KDM6B	ILMN_2397521	ENSG00000132510	lysine demethylase 6B
KDM6B	ILMN_1757129	ENSG00000132510	lysine demethylase 6B
KIF1B	ILMN_1743034	ENSG00000054523	kinesin family member 1B
KIF1B	ILMN_1659444	ENSG00000054523	kinesin family member 1B
KIF5B	ILMN_1788160	ENSG00000170759	kinesin family member 5B
KLC1	ILMN_1726901	ENSG00000126214	kinesin light chain 1
KLC1	ILMN_1654653	ENSG00000126214	kinesin light chain 1
KLF10	ILMN_2411897	ENSG00000155090	KLF transcription factor 10
KLF10	ILMN_1659122	ENSG00000155090	KLF transcription factor 10
KLF10	ILMN_1667594	ENSG00000155090	KLF transcription factor 10
KLF11	ILMN_1673207	ENSG00000172059	KLF transcription factor 11
KLF11	ILMN_1751656	ENSG00000172059	KLF transcription factor 11
KLF2	ILMN_1735930	ENSG00000127528	KLF transcription factor 2
KLF4	ILMN_2137789	ENSG00000136826	KLF transcription factor 4
KLF6	ILMN_1737406	ENSG00000067082	KLF transcription factor 6
KLF6	ILMN_1735014	ENSG00000067082	KLF transcription factor 6
KLF9	ILMN_1778523	ENSG00000119138	KLF transcription factor 9
KLHL15	ILMN_1701648	ENSG00000174010	kelch like family member 15
KLHL18	ILMN_1655608	ENSG00000114648	kelch like family member 18
KLHL2	ILMN_1701837	ENSG00000109466	kelch like family member 2
KLHL21	ILMN_1692785	ENSG00000162413	kelch like family member 21
KLHL30	ILMN_1780663	ENSG00000168427	kelch like family member 30
KLHL36	ILMN_1703314	ENSG00000135686	kelch like family member 36
KLHL5	ILMN_2342437	ENSG00000109790	kelch like family member 5
KLHL5	ILMN_1706687	ENSG00000109790	kelch like family member 5
KMT2C	ILMN_1736165	ENSG00000055609	lysine methyltransferase 2C
KPNA2	ILMN_1721868	ENSG00000182481	karyopherin subunit alpha 2
KPNA3	ILMN_1708427	ENSG00000102753	karyopherin subunit alpha 3
KPNA4	ILMN_1664756	ENSG00000186432	karyopherin subunit alpha 4
KPNA6	ILMN_1696021	ENSG00000025800	karyopherin subunit alpha 6
KTN1	ILMN_1740523	ENSG00000126777	kinectin 1
LACTB	ILMN_1765132	ENSG00000103642	lactamase beta
LACTB	ILMN_1693830	ENSG00000103642	lactamase beta
LAMA5	ILMN_1773567	ENSG00000130702	laminin subunit alpha 5
LAMB3	ILMN_1715684	ENSG00000196878	laminin subunit beta 3
LAMB3	ILMN_1800142	ENSG00000196878	laminin subunit beta 3
LAP3	ILMN_1683792	ENSG00000002549	leucine aminopeptidase 3
LARP1B	ILMN_1733390	ENSG00000138709	La ribonucleoprotein 1B
LARP1B	ILMN_1765212	ENSG00000138709	La ribonucleoprotein 1B
LARP1B	ILMN_1685535	ENSG00000138709	La ribonucleoprotein 1B
LARP4	ILMN_1675365	ENSG00000161813	La ribonucleoprotein 4
LAT2	ILMN_1803560	ENSG00000086730	linker for activation of T cells family member 2
LAT2	ILMN_2326953	ENSG00000086730	linker for activation of T cells family member 2
LATS2	ILMN_1703412	ENSG00000150457	large tumor suppressor kinase 2
LBP	ILMN_1732538	ENSG00000129988	lipopolysaccharide binding protein
LBR	ILMN_1768969	ENSG00000143815	lamin B receptor
LBR	ILMN_1810418	ENSG00000143815	lamin B receptor
LCN2	ILMN_1692223	ENSG00000148346	lipocalin 2
LCN6	ILMN_1792800	ENSG00000267206	lipocalin 6
LCP2	ILMN_1658962	ENSG00000043462	lymphocyte cytosolic protein 2
LDB3	ILMN_2305599	ENSG00000122367	LIM domain binding 3
LDHA	ILMN_1807106	ENSG00000134333	lactate dehydrogenase A
LDLR	ILMN_2053415	ENSG00000130164	low density lipoprotein receptor
LEP	ILMN_2207505	ENSG00000174697	leptin
LGALS8	ILMN_2353358	ENSG00000116977	galectin 8
LGALS8	ILMN_2356654	ENSG00000116977	galectin 8
LGALSL	ILMN_1673548	ENSG00000119862	galectin like
LHCGR	ILMN_1788098	ENSG00000138039	luteinizing hormone/choriogonadotropin receptor
LHPP	ILMN_1752199	ENSG00000107902	phospholysine phosphohistidine inorganic pyrophosphate phosphatase
LIF	ILMN_1738725	ENSG00000128342	LIF interleukin 6 family cytokine
LILRA1	ILMN_1661631	ENSG00000104974	leukocyte immunoglobulin like receptor A1
LILRA2	ILMN_1716983	ENSG00000239998	leukocyte immunoglobulin like receptor A2
LILRA5	ILMN_2357419	ENSG00000187116	leukocyte immunoglobulin like receptor A5
LILRA5	ILMN_2266595	ENSG00000187116	leukocyte immunoglobulin like receptor A5
LILRA5	ILMN_1726545	ENSG00000187116	leukocyte immunoglobulin like receptor A5
LILRB2	ILMN_2312340	ENSG00000131042	leukocyte immunoglobulin like receptor B2
LILRB3	ILMN_1784884	ENSG00000204577	leukocyte immunoglobulin like receptor B3
LIMCH1	ILMN_2139761	ENSG00000064042	LIM and calponin homology domains 1
LIMK2	ILMN_1660624	ENSG00000182541	LIM domain kinase 2
LIMK2	ILMN_1687960	ENSG00000182541	LIM domain kinase 2
LIMK2	ILMN_2367671	ENSG00000182541	LIM domain kinase 2
LIMK2	ILMN_2270443	ENSG00000182541	LIM domain kinase 2
LIMS1	ILMN_1675387	ENSG00000169756	LIM zinc finger domain containing 1
LINC00661	ILMN_2228132	ENSG00000205396	long intergenic non-protein coding RNA 661
LIPG	ILMN_2189027	ENSG00000101670	lipase G, endothelial type
LITAF	ILMN_1713934	ENSG00000189067	lipopolysaccharide induced TNF factor
LMCD1	ILMN_1754969	ENSG00000071282	LIM and cysteine rich domains 1
LMCD1	ILMN_2052135	ENSG00000071282	LIM and cysteine rich domains 1
LMNA	ILMN_1696749	ENSG00000160789	lamin A/C
LMNA	ILMN_1737394	ENSG00000160789	lamin A/C
LMNB1	ILMN_2126706	ENSG00000113368	lamin B1
LNPEP	ILMN_1814737	ENSG00000113441	leucyl and cystinyl aminopeptidase
LONRF1	ILMN_1705953	ENSG00000154359	LON peptidase N-terminal domain and ring finger 1
LONRF2	ILMN_1751016	ENSG00000170500	LON peptidase N-terminal domain and ring finger 2
LONRF3	ILMN_1720452	ENSG00000175556	LON peptidase N-terminal domain and ring finger 3
LONRF3	ILMN_1669380	ENSG00000175556	LON peptidase N-terminal domain and ring finger 3
LOX	ILMN_1695880	ENSG00000113083	lysyl oxidase
LPAR2	ILMN_1662741	ENSG00000064547	lysophosphatidic acid receptor 2
LPGAT1	ILMN_2151277	ENSG00000123684	lysophosphatidylglycerol acyltransferase 1
LRCH4	ILMN_2157075	ENSG00000077454	leucine rich repeats and calponin homology domain containing 4
LRG1	ILMN_1805228	ENSG00000171236	leucine rich alpha-2-glycoprotein 1
LRRC32	ILMN_2129161	ENSG00000137507	leucine rich repeat containing 32
LRRC8A	ILMN_1739840	ENSG00000136802	leucine rich repeat containing 8 VRAC subunit A
LRRC8C	ILMN_2094396	ENSG00000171488	leucine rich repeat containing 8 VRAC subunit C
LRRFIP2	ILMN_1772329	ENSG00000093167	LRR binding FLII interacting protein 2
LRRFIP2	ILMN_1707156	ENSG00000093167	LRR binding FLII interacting protein 2
LRRK2	ILMN_1776649	ENSG00000188906	leucine rich repeat kinase 2
LRRK2	ILMN_2226015	ENSG00000188906	leucine rich repeat kinase 2
LRRN2	ILMN_1696657	ENSG00000170382	leucine rich repeat neuronal 2
LRWD1	ILMN_1682368	ENSG00000161036	leucine rich repeats and WD repeat domain containing 1
LSM10	ILMN_1751803	ENSG00000181817	LSM10, U7 small nuclear RNA associated
LSMEM1	ILMN_1804895	ENSG00000181016	leucine rich single-pass membrane protein 1
LST1	ILMN_1688373	ENSG00000204482	leukocyte specific transcript 1
LST1	ILMN_2345353	ENSG00000204482	leukocyte specific transcript 1
LUZP1	ILMN_1714159	ENSG00000169641	leucine zipper protein 1
LYAR	ILMN_2221564	ENSG00000145220	Ly1 antibody reactive
LYN	ILMN_1781155	ENSG00000254087	LYN proto-oncogene, Src family tyrosine kinase
MAD2L1BP	ILMN_1798454	ENSG00000124688	MAD2L1 binding protein
MAFF	ILMN_2322375	ENSG00000185022	MAF bZIP transcription factor F
MAFG	ILMN_2412761	ENSG00000197063	MAF bZIP transcription factor G
MAFK	ILMN_1705986	ENSG00000198517	MAF bZIP transcription factor K
MAK	ILMN_2209115	ENSG00000111837	male germ cell associated kinase
MAK16	ILMN_1777139	ENSG00000198042	MAK16 homolog
MALL	ILMN_2063168	ENSG00000144063	mal, T cell differentiation protein like
MALLP1	ILMN_2063168	ENSG00000282785	MALL pseudogene 1
MAN1A1	ILMN_1742187	ENSG00000111885	mannosidase alpha class 1A member 1
MANSC1	ILMN_2142752	ENSG00000111261	MANSC domain containing 1
MAP1B	ILMN_1680154	ENSG00000131711	microtubule associated protein 1B
MAP1B	ILMN_2377900	ENSG00000131711	microtubule associated protein 1B
MAP1LC3A	ILMN_1776188	ENSG00000101460	microtubule associated protein 1 light chain 3 alpha
MAP1LC3B	ILMN_1703244	ENSG00000140941	microtubule associated protein 1 light chain 3 beta
MAP2K1	ILMN_1694240	ENSG00000169032	mitogen-activated protein kinase kinase 1
MAP2K3	ILMN_1790534	ENSG00000034152	mitogen-activated protein kinase kinase 3
MAP2K3	ILMN_1815238	ENSG00000034152	mitogen-activated protein kinase kinase 3
MAP2K3	ILMN_1801175	ENSG00000034152	mitogen-activated protein kinase kinase 3
MAP2K3	ILMN_1680777	ENSG00000034152	mitogen-activated protein kinase kinase 3
MAP3K7	ILMN_2379326	ENSG00000135341	mitogen-activated protein kinase kinase kinase 7
MAP3K7CL	ILMN_1699071	ENSG00000156265	MAP3K7 C-terminal like
MAP3K8	ILMN_1741159	ENSG00000107968	mitogen-activated protein kinase kinase kinase 8
MAP4	ILMN_1708064	ENSG00000047849	microtubule associated protein 4
MAP7D1	ILMN_1777906	ENSG00000116871	MAP7 domain containing 1
MAPK1	ILMN_1767320	ENSG00000100030	mitogen-activated protein kinase 1
MAPK1	ILMN_2235283	ENSG00000100030	mitogen-activated protein kinase 1
MAPK10	ILMN_2256907	ENSG00000109339	mitogen-activated protein kinase 10
MAPK1IP1L	ILMN_1779279	ENSG00000168175	mitogen-activated protein kinase 1 interacting protein 1 like
MAPK6	ILMN_1757287	ENSG00000069956	mitogen-activated protein kinase 6
MAPKAP1	ILMN_2268068	ENSG00000119487	MAPK associated protein 1
MAPKAP1	ILMN_2360229	ENSG00000119487	MAPK associated protein 1
MAPKAPK2	ILMN_1774844	ENSG00000162889	MAPK activated protein kinase 2
MAPRE1	ILMN_1777721	ENSG00000101367	microtubule associated protein RP/EB family member 1
MAPT	ILMN_2310814	ENSG00000186868	microtubule associated protein tau
MARCHF2	ILMN_1703142	ENSG00000099785	membrane associated ring-CH-type finger 2
MARCHF2	ILMN_2337789	ENSG00000099785	membrane associated ring-CH-type finger 2
MARCHF3	ILMN_1699644	ENSG00000173926	membrane associated ring-CH-type finger 3
MARCHF3	ILMN_1655796	ENSG00000173926	membrane associated ring-CH-type finger 3
MARCKSL1	ILMN_1714433	ENSG00000175130	MARCKS like 1
MARS2	ILMN_2136423	ENSG00000247626	methionyl-tRNA synthetase 2, mitochondrial
MAT2A	ILMN_1737298	ENSG00000168906	methionine adenosyltransferase 2A
MBOAT7	ILMN_1722218	ENSG00000125505	membrane bound O-acyltransferase domain containing 7
MCAT	ILMN_1745513	ENSG00000100294	malonyl-CoA-acyl carrier protein transacylase
MCEMP1	ILMN_1762713	ENSG00000183019	mast cell expressed membrane protein 1
MCL1	ILMN_1756806	ENSG00000143384	MCL1 apoptosis regulator, BCL2 family member
MCL1	ILMN_1803988	ENSG00000143384	MCL1 apoptosis regulator, BCL2 family member
MCMBP	ILMN_1761411	ENSG00000197771	minichromosome maintenance complex binding protein
MCTP1	ILMN_1658920	ENSG00000175471	multiple C2 and transmembrane domain containing 1
MCTP1	ILMN_1654685	ENSG00000175471	multiple C2 and transmembrane domain containing 1
MCTP2	ILMN_1792682	ENSG00000140563	multiple C2 and transmembrane domain containing 2
MDFIC	ILMN_1717366	ENSG00000135272	MyoD family inhibitor domain containing
MECR	ILMN_1673457	ENSG00000116353	mitochondrial trans-2-enoyl-CoA reductase
MED13	ILMN_1671067	ENSG00000108510	mediator complex subunit 13
MED13P1	ILMN_1671067	ENSG00000236131	mediator complex subunit 13 pseudogene 1
MED19	ILMN_1754553	ENSG00000156603	mediator complex subunit 19
MED26	ILMN_1718171	ENSG00000105085	mediator complex subunit 26
MED8	ILMN_1736847	ENSG00000159479	mediator complex subunit 8
MEDAG	ILMN_1696048	ENSG00000102802	mesenteric estrogen dependent adipogenesis
MEGF9	ILMN_2290118	ENSG00000106780	multiple EGF like domains 9
MEMO1	ILMN_1741599	ENSG00000162959	mediator of cell motility 1
MEMO1P1	ILMN_1741599	ENSG00000226054	MEMO1 pseudogene 1
MET	ILMN_1715175	ENSG00000105976	MET proto-oncogene, receptor tyrosine kinase
METRNL	ILMN_2342066	ENSG00000176845	meteorin like, glial cell differentiation regulator
METRNL	ILMN_1790014	ENSG00000176845	meteorin like, glial cell differentiation regulator
METRNL	ILMN_2258004	ENSG00000176845	meteorin like, glial cell differentiation regulator
METTL1	ILMN_1815190	ENSG00000037897	methyltransferase 1, tRNA methylguanosine
MEX3C	ILMN_1658182	ENSG00000176624	mex-3 RNA binding family member C
MFAP3	ILMN_1708782	ENSG00000037749	microfibril associated protein 3
MGAT4A	ILMN_1755643	ENSG00000071073	alpha-1,3-mannosyl-glycoprotein 4-beta-N-acetylglucosaminyltransferase A
MGP	ILMN_2071809	ENSG00000111341	matrix Gla protein
MGST1	ILMN_1803033	ENSG00000008394	microsomal glutathione S-transferase 1
MGST1	ILMN_2355168	ENSG00000008394	microsomal glutathione S-transferase 1
MGST1	ILMN_1781952	ENSG00000008394	microsomal glutathione S-transferase 1
MID1	ILMN_2371433	ENSG00000101871	midline 1
MID1	ILMN_1761858	ENSG00000101871	midline 1
MID2	ILMN_2382648	ENSG00000080561	midline 2
MIDEAS	ILMN_2297373	ENSG00000156030	mitotic deacetylase associated SANT domain protein
MIDN	ILMN_1746408	ENSG00000167470	midnolin
MIEF1	ILMN_1783394	ENSG00000100335	mitochondrial elongation factor 1
MIR1909	ILMN_1753008	ENSG00000284216	microRNA 1909
MIR22HG	ILMN_2390310	ENSG00000186594	MIR22 host gene
MIR3064	ILMN_1805344	ENSG00000284564	microRNA 3064
MIR3658	ILMN_1768662	ENSG00000283936	microRNA 3658
MIR4435-2HG	ILMN_2143795	ENSG00000172965	MIR4435-2 host gene
MIR4435-2HG	ILMN_1665515	ENSG00000172965	MIR4435-2 host gene
MIR4467	ILMN_1682368	ENSG00000284596	microRNA 4467
MIR4658	ILMN_1770030	ENSG00000284518	microRNA 4658
MIR4668	ILMN_1736939	ENSG00000266315	microRNA 4668
MIR4741	ILMN_1739101	ENSG00000284331	microRNA 4741
MIR5047	ILMN_1805344	ENSG00000284368	microRNA 5047
MIR601	ILMN_1727315	ENSG00000207991	microRNA 601
MIR6514	ILMN_2358652	ENSG00000274066	microRNA 6514
MIR6514	ILMN_1705783	ENSG00000274066	microRNA 6514
MIR7106	ILMN_1812976	ENSG00000276908	microRNA 7106
MIR8085	ILMN_1710514	ENSG00000284258	microRNA 8085
MIS12	ILMN_1718069	ENSG00000167842	MIS12 kinetochore complex component
MKNK1	ILMN_1719677	ENSG00000079277	MAPK interacting serine/threonine kinase 1
MLF1	ILMN_1684439	ENSG00000178053	myeloid leukemia factor 1
MLKL	ILMN_1667825	ENSG00000168404	mixed lineage kinase domain like pseudokinase
MLKL	ILMN_1737498	ENSG00000168404	mixed lineage kinase domain like pseudokinase
MLLT1	ILMN_1706590	ENSG00000130382	MLLT1 super elongation complex subunit
MMD	ILMN_1733937	ENSG00000108960	monocyte to macrophage differentiation associated
MMP19	ILMN_1711062	ENSG00000123342	matrix metallopeptidase 19
MMP19	ILMN_1782953	ENSG00000123342	matrix metallopeptidase 19
MMP25	ILMN_1717207	ENSG00000008516	matrix metallopeptidase 25
MMP28	ILMN_2399016	ENSG00000271447	matrix metallopeptidase 28
MMP3	ILMN_1784459	ENSG00000149968	matrix metallopeptidase 3
MNDA	ILMN_1738992	ENSG00000163563	myeloid cell nuclear differentiation antigen
MOB3C	ILMN_1798288	ENSG00000142961	MOB kinase activator 3C
MOB3C	ILMN_1719677	ENSG00000142961	MOB kinase activator 3C
MOK	ILMN_1745282	ENSG00000080823	MOK protein kinase
MON1B	ILMN_1771651	ENSG00000103111	MON1 homolog B, secretory trafficking associated
MORC3	ILMN_1783702	ENSG00000159256	MORC family CW-type zinc finger 3
MPHOSPH6	ILMN_1781360	ENSG00000135698	M-phase phosphoprotein 6
MPRIP	ILMN_1678692	ENSG00000133030	myosin phosphatase Rho interacting protein
MPRIP	ILMN_1774547	ENSG00000133030	myosin phosphatase Rho interacting protein
MPZL2	ILMN_1752932	ENSG00000149573	myelin protein zero like 2
MRAP	ILMN_1659769	ENSG00000170262	melanocortin 2 receptor accessory protein
MRAP	ILMN_1705676	ENSG00000170262	melanocortin 2 receptor accessory protein
MRAS	ILMN_1748881	ENSG00000158186	muscle RAS oncogene homolog
MRPL50	ILMN_1664833	ENSG00000136897	mitochondrial ribosomal protein L50
MRPS12	ILMN_1754860	ENSG00000128626	mitochondrial ribosomal protein S12
MRPS17	ILMN_1804851	ENSG00000239789	mitochondrial ribosomal protein S17
MSANTD3	ILMN_1714278	ENSG00000066697	Myb/SANT DNA binding domain containing 3
MSANTD3-TMEFF1	ILMN_1729498	ENSG00000251349	MSANTD3-TMEFF1 readthrough
MSC	ILMN_1741404	ENSG00000178860	musculin
MSH5	ILMN_1675708	ENSG00000204410	mutS homolog 5
MSH5-SAPCD1	ILMN_1675708	ENSG00000255152	MSH5-SAPCD1 readthrough (NMD candidate)
MSI2	ILMN_1713088	ENSG00000153944	musashi RNA binding protein 2
MSMO1	ILMN_1689842	ENSG00000052802	methylsterol monooxygenase 1
MSN	ILMN_1659895	ENSG00000147065	moesin
MSRB1	ILMN_1719661	ENSG00000198736	methionine sulfoxide reductase B1
MSRB3	ILMN_1676088	ENSG00000174099	methionine sulfoxide reductase B3
MSRB3	ILMN_1779333	ENSG00000174099	methionine sulfoxide reductase B3
MSRB3	ILMN_2332553	ENSG00000174099	methionine sulfoxide reductase B3
MSX1	ILMN_1777397	ENSG00000163132	msh homeobox 1
MT1A	ILMN_1691156	ENSG00000205362	metallothionein 1A
MT1E	ILMN_2173611	ENSG00000169715	metallothionein 1E
MT1G	ILMN_1715401	ENSG00000125144	metallothionein 1G
MT1H	ILMN_2124802	ENSG00000205358	metallothionein 1H
MT1M	ILMN_1657435	ENSG00000205364	metallothionein 1M
MT1X	ILMN_1775170	ENSG00000187193	metallothionein 1X
MTA2	ILMN_1773763	ENSG00000149480	metastasis associated 1 family member 2
MTERF3	ILMN_2044617	ENSG00000156469	mitochondrial transcription termination factor 3
MTF1	ILMN_1763828	ENSG00000188786	metal regulatory transcription factor 1
MTHFD2	ILMN_1674706	ENSG00000065911	methylenetetrahydrofolate dehydrogenase (NADP+ dependent) 2, methenyltetrahydrofolate cyclohydrolase
MTHFD2	ILMN_2405521	ENSG00000065911	methylenetetrahydrofolate dehydrogenase (NADP+ dependent) 2, methenyltetrahydrofolate cyclohydrolase
MTMR12	ILMN_1802831	ENSG00000150712	myotubularin related protein 12
MTRF1L	ILMN_2175474	ENSG00000112031	mitochondrial translation release factor 1 like
MTUS1	ILMN_1663648	ENSG00000129422	microtubule associated scaffold protein 1
MUC1	ILMN_1756992	ENSG00000185499	mucin 1, cell surface associated
MUC1	ILMN_2371911	ENSG00000185499	mucin 1, cell surface associated
MX1	ILMN_1662358	ENSG00000157601	MX dynamin like GTPase 1
MX2	ILMN_2231928	ENSG00000183486	MX dynamin like GTPase 2
MXD1	ILMN_2214678	ENSG00000059728	MAX dimerization protein 1
MXRA7	ILMN_1692077	ENSG00000182534	matrix remodeling associated 7
MYADM	ILMN_2308849	ENSG00000179820	myeloid associated differentiation marker
MYADM	ILMN_2350574	ENSG00000179820	myeloid associated differentiation marker
MYBPC3	ILMN_1781184	ENSG00000134571	myosin binding protein C3
MYC	ILMN_2110908	ENSG00000136997	MYC proto-oncogene, bHLH transcription factor
MYCT1	ILMN_2160906	ENSG00000120279	MYC target 1
MYEF2	ILMN_1710329	ENSG00000104177	myelin expression factor 2
MYEOV	ILMN_2198413	ENSG00000172927	myeloma overexpressed
MYL4	ILMN_1684255	ENSG00000198336	myosin light chain 4
MYL9	ILMN_1776953	ENSG00000101335	myosin light chain 9
MYO1C	ILMN_2250820	ENSG00000197879	myosin IC
MYO1E	ILMN_1754943	ENSG00000157483	myosin IE
MYO6	ILMN_1727080	ENSG00000196586	myosin VI
MYOC	ILMN_2052331	ENSG00000034971	myocilin
MYZAP	ILMN_1674151	ENSG00000263155	myocardial zonula adherens protein
NABP1	ILMN_1785852	ENSG00000173559	nucleic acid binding protein 1
NACC2	ILMN_1809522	ENSG00000148411	NACC family member 2
NAF1	ILMN_1679891	ENSG00000145414	nuclear assembly factor 1 ribonucleoprotein
NAIP	ILMN_2260082	ENSG00000249437	NLR family apoptosis inhibitory protein
NAMPT	ILMN_1653871	ENSG00000105835	nicotinamide phosphoribosyltransferase
NAMPT	ILMN_1753111	ENSG00000105835	nicotinamide phosphoribosyltransferase
NANOS1	ILMN_1752009	ENSG00000188613	nanos C2HC-type zinc finger 1
NAP1L1	ILMN_1687978	ENSG00000187109	nucleosome assembly protein 1 like 1
NAP1L5	ILMN_1773307	ENSG00000177432	nucleosome assembly protein 1 like 5
NAPG	ILMN_1788268	ENSG00000134265	NSF attachment protein gamma
NAT8B	ILMN_1691264	ENSG00000204872	N-acetyltransferase 8B (putative, gene/pseudogene)
NCAM1	ILMN_1676289	ENSG00000149294	neural cell adhesion molecule 1
NCBP2	ILMN_2412564	ENSG00000114503	nuclear cap binding protein subunit 2
NCF1	ILMN_1697309	ENSG00000158517	neutrophil cytosolic factor 1
NCF1B	ILMN_1697309	ENSG00000182487	neutrophil cytosolic factor 1B pseudogene
NCF1C	ILMN_2112988	ENSG00000165178	neutrophil cytosolic factor 1C pseudogene
NCF4	ILMN_1757361	ENSG00000100365	neutrophil cytosolic factor 4
NCF4	ILMN_2335704	ENSG00000100365	neutrophil cytosolic factor 4
NCOA7	ILMN_1687768	ENSG00000111912	nuclear receptor coactivator 7
NDEL1	ILMN_2397199	ENSG00000166579	nudE neurodevelopment protein 1 like 1
NDEL1	ILMN_1705064	ENSG00000166579	nudE neurodevelopment protein 1 like 1
NDRG1	ILMN_1809931	ENSG00000104419	N-myc downstream regulated 1
NDUFAF4	ILMN_2205350	ENSG00000123545	NADH:ubiquinone oxidoreductase complex assembly factor 4
NDUFV3	ILMN_2387731	ENSG00000160194	NADH:ubiquinone oxidoreductase subunit V3
NECTIN2	ILMN_1718303	ENSG00000130202	nectin cell adhesion molecule 2
NECTIN2	ILMN_2337336	ENSG00000130202	nectin cell adhesion molecule 2
NECTIN2	ILMN_2255382	ENSG00000130202	nectin cell adhesion molecule 2
NEDD4	ILMN_1751407	ENSG00000069869	NEDD4 E3 ubiquitin protein ligase
NEDD9	ILMN_2261076	ENSG00000111859	neural precursor cell expressed, developmentally down-regulated 9
NEDD9	ILMN_1743619	ENSG00000111859	neural precursor cell expressed, developmentally down-regulated 9
NEK6	ILMN_1660871	ENSG00000119408	NIMA related kinase 6
NEK7	ILMN_1758548	ENSG00000151414	NIMA related kinase 7
NEMF	ILMN_1772489	ENSG00000165525	nuclear export mediator factor
NEU1	ILMN_1763144	ENSG00000204386	neuraminidase 1
NEU4	ILMN_2219683	ENSG00000204099	neuraminidase 4
NEXN	ILMN_1783276	ENSG00000162614	nexilin F-actin binding protein
NFATC1	ILMN_1707051	ENSG00000131196	nuclear factor of activated T cells 1
NFATC1	ILMN_1729663	ENSG00000131196	nuclear factor of activated T cells 1
NFATC1	ILMN_2384188	ENSG00000131196	nuclear factor of activated T cells 1
NFATC2	ILMN_1661083	ENSG00000101096	nuclear factor of activated T cells 2
NFE2	ILMN_1711786	ENSG00000123405	nuclear factor, erythroid 2
NFE2L2	ILMN_1790909	ENSG00000116044	NFE2 like bZIP transcription factor 2
NFIL3	ILMN_1707312	ENSG00000165030	nuclear factor, interleukin 3 regulated
NFKB1	ILMN_1714965	ENSG00000109320	nuclear factor kappa B subunit 1
NFKB2	ILMN_1799062	ENSG00000077150	nuclear factor kappa B subunit 2
NFKB2	ILMN_2390859	ENSG00000077150	nuclear factor kappa B subunit 2
NFKBIB	ILMN_1690473	ENSG00000104825	NFKB inhibitor beta
NFKBIB	ILMN_1674152	ENSG00000104825	NFKB inhibitor beta
NFKBID	ILMN_1763560	ENSG00000167604	NFKB inhibitor delta
NFKBIZ	ILMN_1770260	ENSG00000144802	NFKB inhibitor zeta
NFKBIZ	ILMN_1719695	ENSG00000144802	NFKB inhibitor zeta
NFYA	ILMN_1690325	ENSG00000001167	nuclear transcription factor Y subunit alpha
NGF	ILMN_1716608	ENSG00000134259	nerve growth factor
NGRN	ILMN_1660345	ENSG00000182768	neugrin, neurite outgrowth associated
NHLRC2	ILMN_1698715	ENSG00000196865	NHL repeat containing 2
NIBAN2	ILMN_1661755	ENSG00000136830	niban apoptosis regulator 2
NIP7	ILMN_1704305	ENSG00000132603	nucleolar pre-rRNA processing protein NIP7
NIPA2	ILMN_1720344	ENSG00000140157	NIPA magnesium transporter 2
NLRP12	ILMN_1716105	ENSG00000142405	NLR family pyrin domain containing 12
NLRP12	ILMN_1758735	ENSG00000142405	NLR family pyrin domain containing 12
NLRP3	ILMN_2310896	ENSG00000162711	NLR family pyrin domain containing 3
NLRP3	ILMN_1712026	ENSG00000162711	NLR family pyrin domain containing 3
NME1	ILMN_2414399	ENSG00000239672	NME/NM23 nucleoside diphosphate kinase 1
NME1	ILMN_1741133	ENSG00000239672	NME/NM23 nucleoside diphosphate kinase 1
NMNAT2	ILMN_1742968	ENSG00000157064	nicotinamide nucleotide adenylyltransferase 2
NNAT	ILMN_1707734	ENSG00000053438	neuronatin
NNMT	ILMN_1715508	ENSG00000166741	nicotinamide N-methyltransferase
NOC2L	ILMN_1792820	ENSG00000188976	NOC2 like nucleolar associated transcriptional repressor
NOCT	ILMN_1689378	ENSG00000151014	nocturnin
NOLC1	ILMN_2184640	ENSG00000166197	nucleolar and coiled-body phosphoprotein 1
NOMO3	ILMN_1663145	ENSG00000103226	NODAL modulator 3
NOP16	ILMN_1704055	ENSG00000048162	NOP16 nucleolar protein
NOP2	ILMN_1723158	ENSG00000111641	NOP2 nucleolar protein
NOP2	ILMN_2328433	ENSG00000111641	NOP2 nucleolar protein
NOP56	ILMN_2044832	ENSG00000101361	NOP56 ribonucleoprotein
NOP56	ILMN_2209515	ENSG00000101361	NOP56 ribonucleoprotein
NOP58	ILMN_1748476	ENSG00000055044	NOP58 ribonucleoprotein
NOS3	ILMN_1775224	ENSG00000164867	nitric oxide synthase 3
NOTCH1	ILMN_1729161	ENSG00000148400	notch receptor 1
NOTCH3	ILMN_1658926	ENSG00000074181	notch receptor 3
NPB	ILMN_1726281	ENSG00000183979	neuropeptide B
NPC1	ILMN_1713505	ENSG00000141458	NPC intracellular cholesterol transporter 1
NPR3	ILMN_1769556	ENSG00000113389	natriuretic peptide receptor 3
NPTX2	ILMN_1685608	ENSG00000106236	neuronal pentraxin 2
NQO1	ILMN_2354953	ENSG00000181019	NAD(P)H quinone dehydrogenase 1
NQO1	ILMN_1720282	ENSG00000181019	NAD(P)H quinone dehydrogenase 1
NR1H2	ILMN_1678032	ENSG00000131408	nuclear receptor subfamily 1 group H member 2
NR2E3	ILMN_1791916	ENSG00000278570	nuclear receptor subfamily 2 group E member 3
NR4A1	ILMN_2410145	ENSG00000123358	nuclear receptor subfamily 4 group A member 1
NR4A1	ILMN_2408566	ENSG00000123358	nuclear receptor subfamily 4 group A member 1
NR4A1	ILMN_1661178	ENSG00000123358	nuclear receptor subfamily 4 group A member 1
NR4A2	ILMN_2339955	ENSG00000153234	nuclear receptor subfamily 4 group A member 2
NR4A3	ILMN_1807298	ENSG00000119508	nuclear receptor subfamily 4 group A member 3
NR4A3	ILMN_1781812	ENSG00000119508	nuclear receptor subfamily 4 group A member 3
NR4A3	ILMN_1774586	ENSG00000119508	nuclear receptor subfamily 4 group A member 3
NR5A2	ILMN_1811303	ENSG00000116833	nuclear receptor subfamily 5 group A member 2
NR5A2	ILMN_2366654	ENSG00000116833	nuclear receptor subfamily 5 group A member 2
NRAS	ILMN_1775759	ENSG00000213281	NRAS proto-oncogene, GTPase
NRCAM	ILMN_1722809	ENSG00000091129	neuronal cell adhesion molecule
NRCAM	ILMN_2411236	ENSG00000091129	neuronal cell adhesion molecule
NRP2	ILMN_2376484	ENSG00000118257	neuropilin 2
NSL1	ILMN_2276820	ENSG00000117697	NSL1 component of MIS12 kinetochore complex
NSUN2	ILMN_1680129	ENSG00000037474	NOP2/Sun RNA methyltransferase 2
NT5C2	ILMN_1682165	ENSG00000076685	5'-nucleotidase, cytosolic II
NTM	ILMN_1798379	ENSG00000182667	neurotrimin
NTM	ILMN_2263086	ENSG00000182667	neurotrimin
NTM	ILMN_2351466	ENSG00000182667	neurotrimin
NTMT1	ILMN_2170515	ENSG00000148335	N-terminal Xaa-Pro-Lys N-methyltransferase 1
NTRK2	ILMN_1702822	ENSG00000148053	neurotrophic receptor tyrosine kinase 2
NTRK2	ILMN_2357855	ENSG00000148053	neurotrophic receptor tyrosine kinase 2
NUAK2	ILMN_2094952	ENSG00000163545	NUAK family kinase 2
NUDT14	ILMN_1669788	ENSG00000183828	nudix hydrolase 14
NUDT5	ILMN_1711314	ENSG00000165609	nudix hydrolase 5
NUFIP2	ILMN_2102693	ENSG00000108256	nuclear FMR1 interacting protein 2
NUP153	ILMN_1705907	ENSG00000124789	nucleoporin 153
NUP188	ILMN_1715416	ENSG00000095319	nucleoporin 188
NUP50	ILMN_1725612	ENSG00000093000	nucleoporin 50
NUP50P1	ILMN_1725612	ENSG00000259010	nucleoporin 50 pseudogene 1
NUP58	ILMN_2378316	ENSG00000139496	nucleoporin 58
NUP58	ILMN_1746317	ENSG00000139496	nucleoporin 58
NUP88	ILMN_1734826	ENSG00000108559	nucleoporin 88
NUP98	ILMN_1732776	ENSG00000110713	nucleoporin 98 and 96 precursor
NUP98	ILMN_2326793	ENSG00000110713	nucleoporin 98 and 96 precursor
NXF1	ILMN_2358652	ENSG00000162231	nuclear RNA export factor 1
NXF1	ILMN_1705783	ENSG00000162231	nuclear RNA export factor 1
NXT1	ILMN_1760280	ENSG00000132661	nuclear transport factor 2 like export factor 1
NAA15	ILMN_1669142	ENSG00000164134	N-alpha-acetyltransferase 15, NatA auxiliary subunit
OAS2	ILMN_1736729	ENSG00000111335	2'-5'-oligoadenylate synthetase 2
OAS2	ILMN_1709333	ENSG00000111335	2'-5'-oligoadenylate synthetase 2
OASL	ILMN_1681721	ENSG00000135114	2'-5'-oligoadenylate synthetase like
OASL	ILMN_1674811	ENSG00000135114	2'-5'-oligoadenylate synthetase like
ODC1	ILMN_1748591	ENSG00000115758	ornithine decarboxylase 1
ODF2	ILMN_1671288	ENSG00000136811	outer dense fiber of sperm tails 2
ODF2	ILMN_1698653	ENSG00000136811	outer dense fiber of sperm tails 2
OGFOD1	ILMN_1772690	ENSG00000087263	2-oxoglutarate and iron dependent oxygenase domain containing 1
OGFRL1	ILMN_2095759	ENSG00000119900	opioid growth factor receptor like 1
OLR1	ILMN_1723035	ENSG00000173391	oxidized low density lipoprotein receptor 1
OPA3	ILMN_2284591	ENSG00000125741	outer mitochondrial membrane lipid metabolism regulator OPA3
OPA3	ILMN_1662432	ENSG00000125741	outer mitochondrial membrane lipid metabolism regulator OPA3
OR1K1	ILMN_1716249	ENSG00000165204	olfactory receptor family 1 subfamily K member 1
OR2G3	ILMN_2092987	ENSG00000177476	olfactory receptor family 2 subfamily G member 3
OR51E1	ILMN_1750330	ENSG00000180785	olfactory receptor family 51 subfamily E member 1
OR5H6	ILMN_1766438	ENSG00000230301	olfactory receptor family 5 subfamily H member 6
OSER1	ILMN_2049727	ENSG00000132823	oxidative stress responsive serine rich 1
OSGIN1	ILMN_2319588	ENSG00000140961	oxidative stress induced growth inhibitor 1
OSM	ILMN_1780546	ENSG00000099985	oncostatin M
OSMR	ILMN_2205999	ENSG00000145623	oncostatin M receptor
OSTM1	ILMN_1720303	ENSG00000081087	osteoclastogenesis associated transmembrane protein 1
OTUD4	ILMN_1708203	ENSG00000164164	OTU deubiquitinase 4
OTULIN	ILMN_1790062	ENSG00000154124	OTU deubiquitinase with linear linkage specificity
OXSR1	ILMN_1811489	ENSG00000172939	oxidative stress responsive kinase 1
P2RX6P	ILMN_2112744	ENSG00000206145	purinergic receptor P2X 6 pseudogene
P2RY13	ILMN_1664525	ENSG00000181631	purinergic receptor P2Y13
P2RY2	ILMN_2372915	ENSG00000175591	purinergic receptor P2Y2
PACSIN2	ILMN_1702396	ENSG00000100266	protein kinase C and casein kinase substrate in neurons 2
PADI4	ILMN_1807529	ENSG00000159339	peptidyl arginine deiminase 4
PAFAH1B2	ILMN_1743319	ENSG00000168092	platelet activating factor acetylhydrolase 1b catalytic subunit 2
PAFAH1B2P1	ILMN_1743319	ENSG00000214111	PAFAH1B2 pseudogene 1
PAIP1	ILMN_1776398	ENSG00000172239	poly(A) binding protein interacting protein 1
PAIP1P2	ILMN_1776398	ENSG00000174977	PAIP1 pseudogene 2
PAK2	ILMN_1712687	ENSG00000180370	p21 (RAC1) activated kinase 2
PALLD	ILMN_1698732	ENSG00000129116	palladin, cytoskeletal associated protein
PALM2AKAP2	ILMN_1737754	ENSG00000157654	PALM2 and AKAP2 fusion
PALS1	ILMN_1750689	ENSG00000072415	protein associated with LIN7 1, MAGUK p55 family member
PALS2	ILMN_1679995	ENSG00000105926	protein associated with LIN7 2, MAGUK p55 family member
PANX1	ILMN_1697817	ENSG00000110218	pannexin 1
PANX2	ILMN_1694810	ENSG00000073150	pannexin 2
PAPSS2	ILMN_2410929	ENSG00000198682	3'-phosphoadenosine 5'-phosphosulfate synthase 2
PARD6A	ILMN_2323848	ENSG00000102981	par-6 family cell polarity regulator alpha
PARD6A	ILMN_1654112	ENSG00000102981	par-6 family cell polarity regulator alpha
PBRM1	ILMN_1659470	ENSG00000163939	polybromo 1
PCDH17	ILMN_1781514	ENSG00000118946	protocadherin 17
PCDH9	ILMN_1668147	ENSG00000184226	protocadherin 9
PCDH9	ILMN_1752294	ENSG00000184226	protocadherin 9
PCDH9	ILMN_2379626	ENSG00000184226	protocadherin 9
PCNX1	ILMN_1740010	ENSG00000100731	pecanex 1
PCOLCE2	ILMN_1746888	ENSG00000163710	procollagen C-endopeptidase enhancer 2
PCSK7	ILMN_1699545	ENSG00000160613	proprotein convertase subtilisin/kexin type 7
PDCD2	ILMN_1758915	ENSG00000071994	programmed cell death 2
PDCL3	ILMN_1702806	ENSG00000115539	phosducin like 3
PDE12	ILMN_1660305	ENSG00000174840	phosphodiesterase 12
PDE4B	ILMN_2340259	ENSG00000184588	phosphodiesterase 4B
PDE4B	ILMN_1782922	ENSG00000184588	phosphodiesterase 4B
PDE4D	ILMN_1791483	ENSG00000113448	phosphodiesterase 4D
PDGFA	ILMN_2342695	ENSG00000197461	platelet derived growth factor subunit A
PDLIM1	ILMN_1788955	ENSG00000107438	PDZ and LIM domain 1
PDLIM3	ILMN_2230025	ENSG00000154553	PDZ and LIM domain 3
PDLIM4	ILMN_1663976	ENSG00000131435	PDZ and LIM domain 4
PDLIM5	ILMN_2361478	ENSG00000163110	PDZ and LIM domain 5
PDLIM5	ILMN_1692864	ENSG00000163110	PDZ and LIM domain 5
PDLIM5	ILMN_2412281	ENSG00000163110	PDZ and LIM domain 5
PDLIM7	ILMN_1690125	ENSG00000196923	PDZ and LIM domain 7
PDZD8	ILMN_1696962	ENSG00000165650	PDZ domain containing 8
PEA15	ILMN_1771376	ENSG00000162734	proliferation and apoptosis adaptor protein 15
PEDS1	ILMN_2162989	ENSG00000240849	plasmanylethanolamine desaturase 1
PELI1	ILMN_1679268	ENSG00000197329	pellino E3 ubiquitin protein ligase 1
PELO	ILMN_1770811	ENSG00000152684	pelota mRNA surveillance and ribosome rescue factor
PEMT	ILMN_1745806	ENSG00000133027	phosphatidylethanolamine N-methyltransferase
PER2	ILMN_1738095	ENSG00000132326	period circadian regulator 2
PFKFB3	ILMN_2186061	ENSG00000170525	6-phosphofructo-2-kinase/fructose-2,6-biphosphatase 3
PGAM1	ILMN_2112417	ENSG00000171314	phosphoglycerate mutase 1
PGAM1P2	ILMN_2112417	ENSG00000225639	phosphoglycerate mutase 1 pseudogene 2
PGLYRP1	ILMN_1704870	ENSG00000008438	peptidoglycan recognition protein 1
PGS1	ILMN_2075051	ENSG00000087157	phosphatidylglycerophosphate synthase 1
PHACTR1	ILMN_1736982	ENSG00000112137	phosphatase and actin regulator 1
PHC2	ILMN_1808047	ENSG00000134686	polyhomeotic homolog 2
PHC2	ILMN_1673461	ENSG00000134686	polyhomeotic homolog 2
PHC3	ILMN_2179873	ENSG00000173889	polyhomeotic homolog 3
PHF20L1	ILMN_2361185	ENSG00000129292	PHD finger protein 20 like 1
PHLDA1	ILMN_1687978	ENSG00000139289	pleckstrin homology like domain family A member 1
PHLDA2	ILMN_1671557	ENSG00000181649	pleckstrin homology like domain family A member 2
PHLDB1	ILMN_1666819	ENSG00000019144	pleckstrin homology like domain family B member 1
PHLPP2	ILMN_2083567	ENSG00000040199	PH domain and leucine rich repeat protein phosphatase 2
PHYKPL	ILMN_1686370	ENSG00000175309	5-phosphohydroxy-L-lysine phospho-lyase
PI3	ILMN_1693192	ENSG00000124102	peptidase inhibitor 3
PI4KB	ILMN_1666597	ENSG00000143393	phosphatidylinositol 4-kinase beta
PIAS2	ILMN_1694799	ENSG00000078043	protein inhibitor of activated STAT 2
PIAS2	ILMN_1769406	ENSG00000078043	protein inhibitor of activated STAT 2
PICALM	ILMN_1778709	ENSG00000073921	phosphatidylinositol binding clathrin assembly protein
PICALM	ILMN_1715273	ENSG00000073921	phosphatidylinositol binding clathrin assembly protein
PIGA	ILMN_1705985	ENSG00000165195	phosphatidylinositol glycan anchor biosynthesis class A
PIGK	ILMN_1772743	ENSG00000142892	phosphatidylinositol glycan anchor biosynthesis class K
PIK3C2A	ILMN_2166093	ENSG00000011405	phosphatidylinositol-4-phosphate 3-kinase catalytic subunit type 2 alpha
PIK3R1	ILMN_2289433	ENSG00000145675	phosphoinositide-3-kinase regulatory subunit 1
PILRA	ILMN_2241953	ENSG00000085514	paired immunoglobin like type 2 receptor alpha
PIM1	ILMN_1815023	ENSG00000137193	Pim-1 proto-oncogene, serine/threonine kinase
PIM3	ILMN_1789781	ENSG00000198355	Pim-3 proto-oncogene, serine/threonine kinase
PIR	ILMN_2383383	ENSG00000087842	pirin
PISD	ILMN_1793934	ENSG00000241878	phosphatidylserine decarboxylase
PITPNA	ILMN_1715804	ENSG00000174238	phosphatidylinositol transfer protein alpha
PITPNB	ILMN_1809245	ENSG00000180957	phosphatidylinositol transfer protein beta
PITPNC1	ILMN_1670638	ENSG00000154217	phosphatidylinositol transfer protein cytoplasmic 1
PITPNM1	ILMN_1653220	ENSG00000110697	phosphatidylinositol transfer protein membrane associated 1
PITRM1	ILMN_1698072	ENSG00000107959	pitrilysin metallopeptidase 1
PITX1	ILMN_1674386	ENSG00000069011	paired like homeodomain 1
PKD2	ILMN_2052891	ENSG00000118762	polycystin 2, transient receptor potential cation channel
PKD2L1	ILMN_1679782	ENSG00000107593	polycystin 2 like 1, transient receptor potential cation channel
PLA2G4A	ILMN_1803561	ENSG00000116711	phospholipase A2 group IVA
PLAGL2	ILMN_1786601	ENSG00000126003	PLAG1 like zinc finger 2
PLAU	ILMN_1656057	ENSG00000122861	plasminogen activator, urokinase
PLAUR	ILMN_1691508	ENSG00000011422	plasminogen activator, urokinase receptor
PLAUR	ILMN_2374340	ENSG00000011422	plasminogen activator, urokinase receptor
PLAUR	ILMN_2408543	ENSG00000011422	plasminogen activator, urokinase receptor
PLCXD1	ILMN_1747451	ENSG00000182378	phosphatidylinositol specific phospholipase C X domain containing 1
PLCXD1	ILMN_1747451	ENSG00000292344	phosphatidylinositol specific phospholipase C X domain containing 1
PLCZ1	ILMN_1757769	ENSG00000139151	phospholipase C zeta 1
PLEKHA3	ILMN_1797576	ENSG00000116095	pleckstrin homology domain containing A3
PLEKHG1	ILMN_2194561	ENSG00000120278	pleckstrin homology and RhoGEF domain containing G1
PLEKHG2	ILMN_1657836	ENSG00000090924	pleckstrin homology and RhoGEF domain containing G2
PLEKHO2	ILMN_1689968	ENSG00000241839	pleckstrin homology domain containing O2
PLIN2	ILMN_2138765	ENSG00000147872	perilipin 2
PLIN3	ILMN_1660021	ENSG00000105355	perilipin 3
PLK3	ILMN_1679979	ENSG00000173846	polo like kinase 3
PLOD2	ILMN_1799139	ENSG00000152952	procollagen-lysine,2-oxoglutarate 5-dioxygenase 2
PLOD2	ILMN_1771599	ENSG00000152952	procollagen-lysine,2-oxoglutarate 5-dioxygenase 2
PLOD2	ILMN_2410924	ENSG00000152952	procollagen-lysine,2-oxoglutarate 5-dioxygenase 2
PLPP1	ILMN_2343278	ENSG00000067113	phospholipid phosphatase 1
PLPP1	ILMN_1676296	ENSG00000067113	phospholipid phosphatase 1
PLPP1	ILMN_1739161	ENSG00000067113	phospholipid phosphatase 1
PLSCR1	ILMN_1745242	ENSG00000188313	phospholipid scramblase 1
PLAAT5	ILMN_1674349	ENSG00000168004	phospholipase A and acyltransferase 5
PMAIP1	ILMN_2098446	ENSG00000141682	phorbol-12-myristate-13-acetate-induced protein 1
PMEPA1	ILMN_1657823	ENSG00000124225	prostate transmembrane protein, androgen induced 1
PMEPA1	ILMN_2309156	ENSG00000124225	prostate transmembrane protein, androgen induced 1
PMEPA1	ILMN_1734276	ENSG00000124225	prostate transmembrane protein, androgen induced 1
PMF1-BGLAP	ILMN_1755818	ENSG00000260238	PMF1-BGLAP readthrough
PMM2	ILMN_1785336	ENSG00000140650	phosphomannomutase 2
PNO1	ILMN_1753607	ENSG00000115946	partner of NOB1 homolog
PNP	ILMN_2172174	ENSG00000198805	purine nucleoside phosphorylase
PNPLA8	ILMN_2180582	ENSG00000135241	patatin like phospholipase domain containing 8
PNRC1	ILMN_1789955	ENSG00000146278	proline rich nuclear receptor coactivator 1
POFUT2	ILMN_1775823	ENSG00000186866	protein O-fucosyltransferase 2
POLR1C	ILMN_1746686	ENSG00000171453	RNA polymerase I and III subunit C
POLR1C	ILMN_1767219	ENSG00000171453	RNA polymerase I and III subunit C
POLR2D	ILMN_1792672	ENSG00000144231	RNA polymerase II subunit D
POLR2L	ILMN_1670037	ENSG00000177700	RNA polymerase II, I and III subunit L
POLR2M	ILMN_2368145	ENSG00000255529	RNA polymerase II subunit M
POLR2M	ILMN_1675188	ENSG00000255529	RNA polymerase II subunit M
POLR3D	ILMN_1685109	ENSG00000168495	RNA polymerase III subunit D
POM121	ILMN_2145050	ENSG00000196313	POM121 transmembrane nucleoporin
PON2	ILMN_2354381	ENSG00000105854	paraoxonase 2
POP1	ILMN_1768273	ENSG00000104356	POP1 homolog, ribonuclease P/MRP subunit
POP5	ILMN_1687864	ENSG00000167272	POP5 homolog, ribonuclease P/MRP subunit
POR	ILMN_1677768	ENSG00000127948	cytochrome p450 oxidoreductase
PPA1	ILMN_1805827	ENSG00000180817	inorganic pyrophosphatase 1
PPARD	ILMN_1674282	ENSG00000112033	peroxisome proliferator activated receptor delta
PPBP	ILMN_1767281	ENSG00000163736	pro-platelet basic protein
PPFIA1	ILMN_2382126	ENSG00000131626	PTPRF interacting protein alpha 1
PPIF	ILMN_1809607	ENSG00000108179	peptidylprolyl isomerase F
PPIL1	ILMN_2054392	ENSG00000137168	peptidylprolyl isomerase like 1
PPM1B	ILMN_2377210	ENSG00000138032	protein phosphatase, Mg2+/Mn2+ dependent 1B
PPM1D	ILMN_1670875	ENSG00000170836	protein phosphatase, Mg2+/Mn2+ dependent 1D
PPP1R10	ILMN_1659058	ENSG00000204569	protein phosphatase 1 regulatory subunit 10
PPP1R15A	ILMN_1659936	ENSG00000087074	protein phosphatase 1 regulatory subunit 15A
PPP1R15B	ILMN_2106931	ENSG00000158615	protein phosphatase 1 regulatory subunit 15B
PPP2CA	ILMN_2196097	ENSG00000113575	protein phosphatase 2 catalytic subunit alpha
PPP2CB	ILMN_1675693	ENSG00000104695	protein phosphatase 2 catalytic subunit beta
PPP2R1B	ILMN_1779841	ENSG00000137713	protein phosphatase 2 scaffold subunit Abeta
PPP2R1B	ILMN_1704656	ENSG00000137713	protein phosphatase 2 scaffold subunit Abeta
PPP2R2B	ILMN_2298365	ENSG00000156475	protein phosphatase 2 regulatory subunit Bbeta
PPP2R5B	ILMN_2124082	ENSG00000068971	protein phosphatase 2 regulatory subunit B'beta
PPP3CC	ILMN_1690546	ENSG00000120910	protein phosphatase 3 catalytic subunit gamma
PPP4R1	ILMN_2345512	ENSG00000154845	protein phosphatase 4 regulatory subunit 1
PPP6R2	ILMN_1670523	ENSG00000100239	protein phosphatase 6 regulatory subunit 2
PPRC1	ILMN_1796210	ENSG00000148840	PPARG related coactivator 1
PPT2	ILMN_1750664	ENSG00000221988	palmitoyl-protein thioesterase 2
PPT2	ILMN_1676689	ENSG00000221988	palmitoyl-protein thioesterase 2
PPT2-EGFL8	ILMN_1676689	ENSG00000258388	PPT2-EGFL8 readthrough (NMD candidate)
PPTC7	ILMN_1800855	ENSG00000196850	protein phosphatase targeting COQ7
PRDM1	ILMN_2414165	ENSG00000057657	PR/SET domain 1
PRDM1	ILMN_1655077	ENSG00000057657	PR/SET domain 1
PRDM1	ILMN_2294784	ENSG00000057657	PR/SET domain 1
PRELID3A	ILMN_1654671	ENSG00000141391	PRELI domain containing 3A
PRELID3B	ILMN_1728168	ENSG00000101166	PRELI domain containing 3B
PRICKLE2	ILMN_1683148	ENSG00000163637	prickle planar cell polarity protein 2
PRKCQ	ILMN_1733421	ENSG00000065675	protein kinase C theta
PROK2	ILMN_1775257	ENSG00000163421	prokineticin 2
PRPF18	ILMN_1807243	ENSG00000165630	pre-mRNA processing factor 18
PRPS1	ILMN_1667050	ENSG00000147224	phosphoribosyl pyrophosphate synthetase 1
PRRC2A	ILMN_2408179	ENSG00000204469	proline rich coiled-coil 2A
PRRG1	ILMN_1781791	ENSG00000130962	proline rich and Gla domain 1
PRXL2C	ILMN_1717229	ENSG00000158122	peroxiredoxin like 2C
PSAT1	ILMN_1692938	ENSG00000135069	phosphoserine aminotransferase 1
PSG9	ILMN_1801776	ENSG00000183668	pregnancy specific beta-1-glycoprotein 9
PSMA1	ILMN_1691809	ENSG00000129084	proteasome 20S subunit alpha 1
PSMC4	ILMN_2287888	ENSG00000013275	proteasome 26S subunit, ATPase 4
PSMC4	ILMN_2395389	ENSG00000013275	proteasome 26S subunit, ATPase 4
PSMD1	ILMN_1702837	ENSG00000173692	proteasome 26S subunit, non-ATPase 1
PSMD12	ILMN_2368971	ENSG00000197170	proteasome 26S subunit, non-ATPase 12
PSMD14	ILMN_1737396	ENSG00000115233	proteasome 26S subunit, non-ATPase 14
PSME3	ILMN_2346573	ENSG00000131467	proteasome activator subunit 3
PSME3	ILMN_1800975	ENSG00000131467	proteasome activator subunit 3
PSME4	ILMN_1763540	ENSG00000068878	proteasome activator subunit 4
PSMG1	ILMN_1779264	ENSG00000183527	proteasome assembly chaperone 1
PTAFR	ILMN_1746836	ENSG00000169403	platelet activating factor receptor
PTBP1	ILMN_2333319	ENSG00000011304	polypyrimidine tract binding protein 1
PTGER2	ILMN_1703926	ENSG00000125384	prostaglandin E receptor 2
PTGER4	ILMN_1795930	ENSG00000171522	prostaglandin E receptor 4
PTGS2	ILMN_2054297	ENSG00000073756	prostaglandin-endoperoxide synthase 2
PTP4A3	ILMN_1769779	ENSG00000184489	protein tyrosine phosphatase 4A3
PTPN1	ILMN_1681591	ENSG00000196396	protein tyrosine phosphatase non-receptor type 1
PTPN11	ILMN_1778236	ENSG00000179295	protein tyrosine phosphatase non-receptor type 11
PTPN12	ILMN_2222074	ENSG00000127947	protein tyrosine phosphatase non-receptor type 12
PTPN21	ILMN_1719664	ENSG00000070778	protein tyrosine phosphatase non-receptor type 21
PTPRB	ILMN_1672102	ENSG00000127329	protein tyrosine phosphatase receptor type B
PTPRE	ILMN_2383611	ENSG00000132334	protein tyrosine phosphatase receptor type E
PTPRE	ILMN_1756814	ENSG00000132334	protein tyrosine phosphatase receptor type E
PTRH1	ILMN_1763842	ENSG00000187024	peptidyl-tRNA hydrolase 1 homolog
PTRH2	ILMN_2311548	ENSG00000141378	peptidyl-tRNA hydrolase 2
PTS	ILMN_2162328	ENSG00000150787	6-pyruvoyltetrahydropterin synthase
PUM3	ILMN_1665483	ENSG00000080608	pumilio RNA binding family member 3
PURB	ILMN_1750079	ENSG00000146676	purine rich element binding protein B
PUS1	ILMN_1662658	ENSG00000177192	pseudouridine synthase 1
PUS1	ILMN_2411559	ENSG00000177192	pseudouridine synthase 1
PVR	ILMN_1677305	ENSG00000073008	PVR cell adhesion molecule
PWP1	ILMN_1743049	ENSG00000136045	PWP1 homolog, endonuclein
PXDC1	ILMN_1709026	ENSG00000168994	PX domain containing 1
QSOX2	ILMN_1789384	ENSG00000165661	quiescin sulfhydryl oxidase 2
QTRT2	ILMN_2155516	ENSG00000151576	queuine tRNA-ribosyltransferase accessory subunit 2
R3HDM4	ILMN_1808202	ENSG00000198858	R3H domain containing 4
RAB11FIP1	ILMN_2409596	ENSG00000156675	RAB11 family interacting protein 1
RAB21	ILMN_1746856	ENSG00000080371	RAB21, member RAS oncogene family
RAB29	ILMN_1813685	ENSG00000117280	RAB29, member RAS oncogene family
RAB2A	ILMN_1652394	ENSG00000104388	RAB2A, member RAS oncogene family
RAB30	ILMN_2214355	ENSG00000137502	RAB30, member RAS oncogene family
RAB35	ILMN_1812571	ENSG00000111737	RAB35, member RAS oncogene family
RAB3IP	ILMN_1803197	ENSG00000127328	RAB3A interacting protein
RAB5A	ILMN_1805800	ENSG00000144566	RAB5A, member RAS oncogene family
RAB5C	ILMN_2399140	ENSG00000108774	RAB5C, member RAS oncogene family
RAB5IF	ILMN_2283388	ENSG00000101084	RAB5 interacting factor
RAB5IF	ILMN_1679195	ENSG00000101084	RAB5 interacting factor
RAB5IF	ILMN_2387599	ENSG00000101084	RAB5 interacting factor
RAB6B	ILMN_1752299	ENSG00000154917	RAB6B, member RAS oncogene family
RABL3	ILMN_1662306	ENSG00000144840	RAB, member of RAS oncogene family like 3
RALGAPB	ILMN_1733115	ENSG00000170471	Ral GTPase activating protein non-catalytic subunit beta
RALGDS	ILMN_1699856	ENSG00000160271	ral guanine nucleotide dissociation stimulator
RALGDS	ILMN_2297961	ENSG00000160271	ral guanine nucleotide dissociation stimulator
RAN	ILMN_1757384	ENSG00000132341	RAN, member RAS oncogene family
RANBP3L	ILMN_2094856	ENSG00000164188	RAN binding protein 3 like
RAPGEF4	ILMN_1661802	ENSG00000091428	Rap guanine nucleotide exchange factor 4
RARA	ILMN_1659206	ENSG00000131759	retinoic acid receptor alpha
RASA3	ILMN_1654586	ENSG00000185989	RAS p21 protein activator 3
RASD1	ILMN_1740426	ENSG00000108551	ras related dexamethasone induced 1
RASIP1	ILMN_1755657	ENSG00000105538	Ras interacting protein 1
RASSF1	ILMN_1683239	ENSG00000068028	Ras association domain family member 1
RASSF5	ILMN_2362902	ENSG00000266094	Ras association domain family member 5
RASSF5	ILMN_1813795	ENSG00000266094	Ras association domain family member 5
RASSF5	ILMN_1669189	ENSG00000266094	Ras association domain family member 5
RASSF8	ILMN_1736741	ENSG00000123094	Ras association domain family member 8
RBBP6	ILMN_1665135	ENSG00000122257	RB binding protein 6, ubiquitin ligase
RBBP8	ILMN_2363621	ENSG00000101773	RB binding protein 8, endonuclease
RBBP8	ILMN_1739101	ENSG00000101773	RB binding protein 8, endonuclease
RBM12	ILMN_2329834	ENSG00000244462	RNA binding motif protein 12
RBM12	ILMN_2276002	ENSG00000244462	RNA binding motif protein 12
RBM14-RBM4	ILMN_1757439	ENSG00000248643	RBM14-RBM4 readthrough
RBM14-RBM4	ILMN_1709042	ENSG00000248643	RBM14-RBM4 readthrough
RBM15	ILMN_1666739	ENSG00000162775	RNA binding motif protein 15
RBM18	ILMN_2222872	ENSG00000119446	RNA binding motif protein 18
RBM24	ILMN_2118832	ENSG00000112183	RNA binding motif protein 24
RBM28	ILMN_1793033	ENSG00000106344	RNA binding motif protein 28
RBM3	ILMN_2298261	ENSG00000102317	RNA binding motif protein 3
RBM38	ILMN_1704079	ENSG00000132819	RNA binding motif protein 38
RBM39	ILMN_2411963	ENSG00000131051	RNA binding motif protein 39
RBM4	ILMN_1757439	ENSG00000173933	RNA binding motif protein 4
RBM4	ILMN_1709042	ENSG00000173933	RNA binding motif protein 4
RBM7	ILMN_2183331	ENSG00000076053	RNA binding motif protein 7
RBMS1	ILMN_2358540	ENSG00000153250	RNA binding motif single stranded interacting protein 1
RBMS1	ILMN_1666444	ENSG00000153250	RNA binding motif single stranded interacting protein 1
RBMS1P1	ILMN_2358540	ENSG00000225422	RNA binding motif single stranded interacting protein 1 pseudogene 1
RBMS1P1	ILMN_1666444	ENSG00000225422	RNA binding motif single stranded interacting protein 1 pseudogene 1
RBPMS2	ILMN_1808238	ENSG00000166831	RNA binding protein, mRNA processing factor 2
RCAN1	ILMN_2367239	ENSG00000159200	regulator of calcineurin 1
RCAN1	ILMN_1712112	ENSG00000159200	regulator of calcineurin 1
RCL1	ILMN_1813766	ENSG00000120158	RNA terminal phosphate cyclase like 1
RDH10	ILMN_1714335	ENSG00000121039	retinol dehydrogenase 10
RDH5	ILMN_1773395	ENSG00000135437	retinol dehydrogenase 5
REC8	ILMN_2317751	ENSG00000100918	REC8 meiotic recombination protein
REC8	ILMN_1751886	ENSG00000100918	REC8 meiotic recombination protein
RECQL	ILMN_2380999	ENSG00000004700	RecQ like helicase
REG3A	ILMN_2382679	ENSG00000172016	regenerating family member 3 alpha
REL	ILMN_2124064	ENSG00000162924	REL proto-oncogene, NF-kB subunit
RELA	ILMN_1705266	ENSG00000173039	RELA proto-oncogene, NF-kB subunit
RELB	ILMN_1811258	ENSG00000104856	RELB proto-oncogene, NF-kB subunit
REM2	ILMN_1745262	ENSG00000139890	RRAD and GEM like GTPase 2
REPS2	ILMN_2405797	ENSG00000169891	RALBP1 associated Eps domain containing 2
REPS2	ILMN_1656934	ENSG00000169891	RALBP1 associated Eps domain containing 2
REPS2	ILMN_1724668	ENSG00000169891	RALBP1 associated Eps domain containing 2
RETSAT	ILMN_1702633	ENSG00000042445	retinol saturase
REXO1	ILMN_1753008	ENSG00000079313	RNA exonuclease 1 homolog
REXO2	ILMN_1749009	ENSG00000076043	RNA exonuclease 2
RFX1	ILMN_1725787	ENSG00000132005	regulatory factor X1
RFX2	ILMN_2396287	ENSG00000087903	regulatory factor X2
RFX2	ILMN_1706357	ENSG00000087903	regulatory factor X2
RFX5	ILMN_2363843	ENSG00000143390	regulatory factor X5
RGCC	ILMN_1658494	ENSG00000102760	regulator of cell cycle
RGL4	ILMN_1663422	ENSG00000159496	ral guanine nucleotide dissociation stimulator like 4
RGMB	ILMN_1710479	ENSG00000174136	repulsive guidance molecule BMP co-receptor b
RGN	ILMN_2372698	ENSG00000130988	regucalcin
RGPD1	ILMN_2056074	ENSG00000187627	RANBP2 like and GRIP domain containing 1
RGPD1	ILMN_2116827	ENSG00000187627	RANBP2 like and GRIP domain containing 1
RGPD2	ILMN_2056074	ENSG00000185304	RANBP2 like and GRIP domain containing 2
RGPD2	ILMN_2116827	ENSG00000185304	RANBP2 like and GRIP domain containing 2
RGPD5	ILMN_2295318	ENSG00000015568	RANBP2 like and GRIP domain containing 5
RGPD6	ILMN_2295318	ENSG00000183054	RANBP2 like and GRIP domain containing 6
RGPD8	ILMN_2295318	ENSG00000169629	RANBP2 like and GRIP domain containing 8
RGS1	ILMN_1656011	ENSG00000090104	regulator of G protein signaling 1
RGS11	ILMN_2379240	ENSG00000076344	regulator of G protein signaling 11
RGS11	ILMN_1763704	ENSG00000076344	regulator of G protein signaling 11
RGS16	ILMN_1808226	ENSG00000143333	regulator of G protein signaling 16
RGS18	ILMN_2101278	ENSG00000150681	regulator of G protein signaling 18
RGS2	ILMN_2197365	ENSG00000116741	regulator of G protein signaling 2
RGS4	ILMN_1758067	ENSG00000117152	regulator of G protein signaling 4
RHBDF2	ILMN_1691717	ENSG00000129667	rhomboid 5 homolog 2
RHBDF2	ILMN_2373062	ENSG00000129667	rhomboid 5 homolog 2
RHEB	ILMN_1657949	ENSG00000106615	Ras homolog, mTORC1 binding
RHEBP1	ILMN_1657949	ENSG00000229927	RHEB pseudogene 1
RHOA	ILMN_1749662	ENSG00000067560	ras homolog family member A
RHOB	ILMN_1802205	ENSG00000143878	ras homolog family member B
RHOC	ILMN_1673305	ENSG00000155366	ras homolog family member C
RHOC	ILMN_2313730	ENSG00000155366	ras homolog family member C
RHOH	ILMN_1684553	ENSG00000168421	ras homolog family member H
RHOJ	ILMN_2107613	ENSG00000126785	ras homolog family member J
RHOQ	ILMN_1810559	ENSG00000119729	ras homolog family member Q
RHOXF1	ILMN_1776888	ENSG00000101883	Rhox homeobox family member 1
RIC8B	ILMN_1663532	ENSG00000111785	RIC8 guanine nucleotide exchange factor B
RILPL2	ILMN_1678490	ENSG00000150977	Rab interacting lysosomal protein like 2
RIOK1	ILMN_1797534	ENSG00000124784	RIO kinase 1
RIOK1	ILMN_1652487	ENSG00000124784	RIO kinase 1
RIOK3	ILMN_2404135	ENSG00000101782	RIO kinase 3
RIOK3	ILMN_1724700	ENSG00000101782	RIO kinase 3
RIPK1	ILMN_2119535	ENSG00000137275	receptor interacting serine/threonine kinase 1
RIPOR1	ILMN_1680037	ENSG00000039523	RHO family interacting cell polarization regulator 1
RIPOR2	ILMN_1726597	ENSG00000111913	RHO family interacting cell polarization regulator 2
RIT1	ILMN_1656335	ENSG00000143622	Ras like without CAAX 1
RLF	ILMN_1801156	ENSG00000117000	RLF zinc finger
RMC1	ILMN_1719097	ENSG00000141452	regulator of MON1-CCZ1
RN7SK	ILMN_2074860	ENSG00000283293	RNA component of 7SK nuclear ribonucleoprotein
RN7SKP80	ILMN_2074860	ENSG00000202058	RN7SK pseudogene 80
RN7SL731P	ILMN_1743034	ENSG00000264501	RNA, 7SL, cytoplasmic 731, pseudogene
RN7SL775P	ILMN_1678692	ENSG00000243370	RNA, 7SL, cytoplasmic 775, pseudogene
RNASE2	ILMN_1730628	ENSG00000169385	ribonuclease A family member 2
RNASE8	ILMN_1716967	ENSG00000173431	ribonuclease A family member 8
RND1	ILMN_1651838	ENSG00000172602	Rho family GTPase 1
RND3	ILMN_1759513	ENSG00000115963	Rho family GTPase 3
RNF11	ILMN_2168758	ENSG00000123091	ring finger protein 11
RNF122	ILMN_1691119	ENSG00000133874	ring finger protein 122
RNF149	ILMN_2112524	ENSG00000163162	ring finger protein 149
RNF152	ILMN_2071826	ENSG00000176641	ring finger protein 152
RNF19A	ILMN_2381197	ENSG00000034677	ring finger protein 19A, RBR E3 ubiquitin protein ligase
RNF19B	ILMN_1682081	ENSG00000116514	ring finger protein 19B
RNF24	ILMN_1717809	ENSG00000101236	ring finger protein 24
RNF44	ILMN_1660079	ENSG00000146083	ring finger protein 44
RNF6	ILMN_1725306	ENSG00000127870	ring finger protein 6
RNFT1	ILMN_1688606	ENSG00000189050	ring finger protein, transmembrane 1
RNU6-646P	ILMN_1665217	ENSG00000201441	RNA, U6 small nuclear 646, pseudogene
ROPN1L	ILMN_1696466	ENSG00000145491	rhophilin associated tail protein 1 like
RP2	ILMN_1659255	ENSG00000102218	RP2 activator of ARL3 GTPase
RPGR	ILMN_2336803	ENSG00000156313	retinitis pigmentosa GTPase regulator
RPGR	ILMN_1768097	ENSG00000156313	retinitis pigmentosa GTPase regulator
RPGR	ILMN_2240128	ENSG00000156313	retinitis pigmentosa GTPase regulator
RPL29	ILMN_1771051	ENSG00000162244	ribosomal protein L29
RPL6	ILMN_1717490	ENSG00000089009	ribosomal protein L6
RPL7A	ILMN_2135175	ENSG00000148303	ribosomal protein L7a
RPL7A	ILMN_2160160	ENSG00000148303	ribosomal protein L7a
RPP38-DT	ILMN_1652715	ENSG00000176236	RPP38 divergent transcript
RPP40	ILMN_1810423	ENSG00000124787	ribonuclease P/MRP subunit p40
RPS20P21	ILMN_1739032	ENSG00000244295	ribosomal protein S20 pseudogene 21
RPS26P19	ILMN_1792672	ENSG00000244563	ribosomal protein S26 pseudogene 19
RPS6KA3	ILMN_1806294	ENSG00000177189	ribosomal protein S6 kinase A3
RPS6KA3	ILMN_1770822	ENSG00000177189	ribosomal protein S6 kinase A3
RRAD	ILMN_2186137	ENSG00000166592	RRAD, Ras related glycolysis inhibitor and calcium channel regulator
RRAGC	ILMN_1760121	ENSG00000116954	Ras related GTP binding C
RRAS2	ILMN_2077623	ENSG00000133818	RAS related 2
RRAS2P1	ILMN_2077623	ENSG00000236360	RRAS2 pseudogene 1
RRN3	ILMN_1765401	ENSG00000085721	RRN3 homolog, RNA polymerase I transcription factor
RRP12	ILMN_1767253	ENSG00000052749	ribosomal RNA processing 12 homolog
RRP15	ILMN_1685661	ENSG00000067533	ribosomal RNA processing 15 homolog
RRP7BP	ILMN_2074860	ENSG00000291035	ribosomal RNA processing 7 homolog B, pseudogene
RRS1	ILMN_1767658	ENSG00000179041	ribosome biogenesis regulator 1 homolog
RSPH3	ILMN_1788223	ENSG00000130363	radial spoke head 3
RTEL1-TNFRSF6B	ILMN_2331231	ENSG00000026036	RTEL1-TNFRSF6B readthrough (NMD candidate)
RTL6	ILMN_1691425	ENSG00000188636	retrotransposon Gag like 6
RTN4	ILMN_1730611	ENSG00000115310	reticulon 4
RUBCNL	ILMN_2196550	ENSG00000102445	rubicon like autophagy enhancer
RUFY4	ILMN_1678627	ENSG00000188282	RUN and FYVE domain containing 4
RYBP	ILMN_1721842	ENSG00000163602	RING1 and YY1 binding protein
S100A10	ILMN_2046730	ENSG00000197747	S100 calcium binding protein A10
S100A11	ILMN_1750101	ENSG00000163191	S100 calcium binding protein A11
S100A12	ILMN_1748915	ENSG00000163221	S100 calcium binding protein A12
S100A16	ILMN_1728049	ENSG00000188643	S100 calcium binding protein A16
S100A8	ILMN_1729801	ENSG00000143546	S100 calcium binding protein A8
S100A9	ILMN_1750974	ENSG00000163220	S100 calcium binding protein A9
S100P	ILMN_1801216	ENSG00000163993	S100 calcium binding protein P
S1PR1	ILMN_1653504	ENSG00000170989	sphingosine-1-phosphate receptor 1
S1PR4	ILMN_1784737	ENSG00000125910	sphingosine-1-phosphate receptor 4
SAMD4A	ILMN_2119297	ENSG00000020577	sterile alpha motif domain containing 4A
SAMD8	ILMN_2105177	ENSG00000156671	sterile alpha motif domain containing 8
SAMSN1	ILMN_2171289	ENSG00000155307	SAM domain, SH3 domain and nuclear localization signals 1
SAP30BP	ILMN_2199022	ENSG00000161526	SAP30 binding protein
SAR1B	ILMN_2394296	ENSG00000152700	secretion associated Ras related GTPase 1B
SAR1B	ILMN_1736888	ENSG00000152700	secretion associated Ras related GTPase 1B
SASH1	ILMN_2185984	ENSG00000111961	SAM and SH3 domain containing 1
SAT1	ILMN_1753342	ENSG00000130066	spermidine/spermine N1-acetyltransferase 1
SBNO2	ILMN_1808811	ENSG00000064932	strawberry notch homolog 2
SCAF11	ILMN_2069593	ENSG00000139218	SR-related CTD associated factor 11
SCAND1	ILMN_1795317	ENSG00000171222	SCAN domain containing 1
SCHIP1	ILMN_1794598	ENSG00000151967	schwannomin interacting protein 1
SCIN	ILMN_1813561	ENSG00000006747	scinderin
SCML1	ILMN_1776653	ENSG00000047634	Scm polycomb group protein like 1
SCML1	ILMN_2340908	ENSG00000047634	Scm polycomb group protein like 1
SCO2	ILMN_1701621	ENSG00000284194	synthesis of cytochrome C oxidase 2
SCP2	ILMN_1674955	ENSG00000116171	sterol carrier protein 2
SCUBE2	ILMN_1779416	ENSG00000175356	signal peptide, CUB domain and EGF like domain containing 2
SCYL2	ILMN_1711919	ENSG00000136021	SCY1 like pseudokinase 2
SDC4	ILMN_1663042	ENSG00000124145	syndecan 4
SDCBP	ILMN_2363586	ENSG00000137575	syndecan binding protein
SDE2	ILMN_1748291	ENSG00000143751	SDE2 telomere maintenance homolog
SDS	ILMN_1811114	ENSG00000135094	serine dehydratase
SDSL	ILMN_1750674	ENSG00000139410	serine dehydratase like
SEC14L1	ILMN_2391912	ENSG00000129657	SEC14 like lipid binding 1
SEC14L1	ILMN_2285802	ENSG00000129657	SEC14 like lipid binding 1
SEC22C	ILMN_1752435	ENSG00000093183	SEC22 homolog C, vesicle trafficking protein
SEC23B	ILMN_2366246	ENSG00000101310	SEC23 homolog B, COPII coat complex component
SEH1L	ILMN_2381138	ENSG00000085415	SEH1 like nucleoporin
SEH1L	ILMN_1708619	ENSG00000085415	SEH1 like nucleoporin
SEH1L	ILMN_1705032	ENSG00000085415	SEH1 like nucleoporin
SELE	ILMN_2193892	ENSG00000007908	selectin E
SELENOW	ILMN_2045994	ENSG00000178980	selenoprotein W
SELL	ILMN_1724422	ENSG00000188404	selectin L
SELP	ILMN_1715417	ENSG00000174175	selectin P
SEMA3F	ILMN_1761540	ENSG00000001617	semaphorin 3F
SEMA3G	ILMN_1676067	ENSG00000010319	semaphorin 3G
SEMA4A	ILMN_1702787	ENSG00000196189	semaphorin 4A
SEMA4D	ILMN_1687533	ENSG00000187764	semaphorin 4D
SEMA6B	ILMN_1712914	ENSG00000167680	semaphorin 6B
SENP2	ILMN_2123567	ENSG00000163904	SUMO specific peptidase 2
SENP3-EIF4A1	ILMN_1722900	ENSG00000277957	SENP3-EIF4A1 readthrough (NMD candidate)
SENP5	ILMN_1675501	ENSG00000119231	SUMO specific peptidase 5
SERHL	ILMN_2289840	ENSG00000293485	serine hydrolase like (pseudogene)
SERPINA1	ILMN_2404154	ENSG00000197249	serpin family A member 1
SERPINA1	ILMN_2338452	ENSG00000197249	serpin family A member 1
SERPINA13P	ILMN_1743046	ENSG00000187483	serpin family A member 13, pseudogene
SERPINA13P	ILMN_1743046	ENSG00000290676	serpin family A member 13, pseudogene
SERPINA3	ILMN_1788874	ENSG00000196136	serpin family A member 3
SERPINB1	ILMN_1679133	ENSG00000021355	serpin family B member 1
SERPINB10	ILMN_2147424	ENSG00000242550	serpin family B member 10
SERPINB2	ILMN_2150856	ENSG00000197632	serpin family B member 2
SERPINB8	ILMN_1718960	ENSG00000166401	serpin family B member 8
SERPINB8	ILMN_2397028	ENSG00000166401	serpin family B member 8
SERPINE1	ILMN_1744381	ENSG00000106366	serpin family E member 1
SERTAD1	ILMN_1794017	ENSG00000197019	SERTA domain containing 1
SERTAD2	ILMN_1651347	ENSG00000179833	SERTA domain containing 2
SERTAD3	ILMN_1813955	ENSG00000167565	SERTA domain containing 3
SERTAD3	ILMN_1801934	ENSG00000167565	SERTA domain containing 3
SERTAD3	ILMN_1804502	ENSG00000167565	SERTA domain containing 3
SESN2	ILMN_1751598	ENSG00000130766	sestrin 2
SETD3	ILMN_1679577	ENSG00000183576	SET domain containing 3, actin histidine methyltransferase
SF1	ILMN_1712560	ENSG00000168066	splicing factor 1
SFPQ	ILMN_1769931	ENSG00000116560	splicing factor proline and glutamine rich
SGCB	ILMN_2194467	ENSG00000163069	sarcoglycan beta
SGIP1	ILMN_1664362	ENSG00000118473	SH3GL interacting endocytic adaptor 1
[truncated: 631 more rows]

## Sheet: Reduced after BS Unique Genes
7SK
ABCA5
ABCC1
ABCC6
ABCE1
ABCF1
ABCF2
ABCF2-H2BK1
ABHD17B
ABHD2
ABHD4
ABHD5
ABL1
ABL2
ABRA
ABTB2
ACADVL
ACKR1
ACOT9
ACOX1
ACSL4
ACTL7B
ACTN4
ACTR1A
ACVR1B
ACYP2
ADAM12
ADAM17
ADAM19
ADAM2
ADAM23
ADAM8
ADAMTS1
ADAMTS18
ADAMTS2
ADAMTS4
ADAMTS9
ADAMTSL2
ADAP1
ADCY2
ADGRE2
ADGRE3
ADGRE5
ADGRG1
ADGRG3
ADM
ADNP2
ADRA2A
ADRB2
AEN
AFF4
AFG1L
AGFG1
AGO2
AGO3
AGPAT3
AGPAT4
AHCTF1
AHCYL1
AHR
AHSP
AKAP12
AKAP13
AKIRIN1
AKIRIN2
AKR1B15
AKR1C2
AKR1C3
ALAS1
ALAS2
ALDH1A2
ALDH4A1
ALDOA
ALDOB
ALDOC
ALOX5
ALOX5AP
ALYREF
AMD1
AMMECR1L
ANAPC11
ANGPT1
ANGPT2
ANGPTL4
ANKDD1A
ANKRD1
ANKRD13D
ANKRD17
ANKRD28
ANKRD30A
ANKRD37
ANKRD40
ANXA1
ANXA2
ANXA3
ANXA5
AOC2
AP3D1
APOBEC3A
APOLD1
AQP11
AQP9
ARC
ARF4
ARFGEF2
ARG2
ARHGAP21
ARHGAP9
ARHGDIG
ARHGEF1
ARHGEF15
ARID5A
ARID5B
ARIH1
ARK2N
ARL13B
ARL4A
ARL4AP1
ARL4AP2
ARL5B
ARL6
ARMC8
ARPC5L
ARPP21
ARRDC3
ASAH1
ASB10
ASGR1
ASPH
ATAD3A
ATAD3B
ATAT1
ATF2
ATF3
ATF4
ATF6
ATG101
ATG16L2
ATP1A1
ATP1B3
ATP2A2
ATP2B4
ATP2C1
ATP6V0A4
ATP6V1G2
ATP6V1G2-DDX39B
ATPSCKMT
AVIL
AVL9
AZIN1
B3GNT2
B3GNT5
B4GALT3
B4GALT5
B9D2
BACH1
BACH1-IT1
BAG3
BAIAP2L1
BAMBI
BATF
BATF3
BAZ1A
BCAP29
BCAR1
BCAR3
BCAS4
BCCIP
BCL10
BCL2
BCL2L1
BCL2L12
BCL3
BCL6
BCL6B
BCL7B
BCOR
BCR
BDKRB1
BDKRB2
BEGAIN
BEST1
BEX1
BGLAP
BHLHE40
BHMT2
BIN3
BIRC3
BLOC1S2
BMP2
BNIP2
BOLA1
BORCS7
BPI
BPNT2
BRD2
BRIX1
BRWD1
BST1
BTBD1
BTBD3
BTBD7
BTBD9
BTG1
BTG2
BTG3
BTLA
BVES
BYSL
C10orf90
C15orf39
C19orf12
C19orf73
C1GALT1
C1orf198
C1orf53
C1orf56
C21orf91
C2CD2
C2CD4A
C2CD4B
C2orf49
C3orf52
C4A
C4orf19
C5AR1
C8orf76
C9orf72
CA1
CA13
CAB39L
CACNA2D1
CADM2
CALM1
CALR3
CAMP
CAMSAP2
CAMTA1
CAP2
CAPRIN1
CARD16
CARD19
CARD6
CASP3
CASP4
CASP9
CASZ1
CAVIN2
CBLB
CBLL1
CBLN2
CCDC107
CCDC184
CCDC69
CCDC71L
CCDC80
CCDC9
CCL2
CCL20
CCL3
CCL3L3
CCL4L2
CCL8
CCM2
CCN1
CCN2
CCND1
CCND2
CCND3
CCNK
CCNL1
CCNT1
CCNYL1
CCPG1
CCR7
CCT2
CCT5
CCT6A
CCT6P3
CD151
CD200
CD274
CD44
CD46
CD55
CD59
CD69
CD83
CD86
CD93
CDA
CDC37
CDC42
CDC42EP1
CDC42EP2
CDC42EP3
CDC42EP4
CDC42SE1
CDC7
CDH13
CDH7
CDK11A
CDK11B
CDK17
CDK2
CDK9
CDKL1
CDKN1A
CDKN2B
CDKN2D
CDR2
CDR2L
CDV3
CDY1
CDY1B
CDY2A
CDY2B
CEACAM1
CEACAM3
CEBPB
CEBPD
CELF1
CELF2
CEMIP2
CENPN
CEP19
CES1
CES1P1
CFAP161
CFAP20
CFAP221
CFAP298
CFAP298-TCP10L
CFAP44
CFAP69
CFH
CGAS
CGGBP1
CH25H
CHD1
CHD2
CHD7
CHIC2
CHMP1B
CHRNA10
CHRNA6
CHST15
CHST2
CHST3
CHSY1
CHUK
CIMAP1C
CKMT2
CKS2
CLC
CLCF1
CLCN4
CLDN15
CLDND1
CLEC4D
CLEC4E
CLEC7A
CLIC4
CLIC4P1
CLIC5
CLIP1
CLK1
CLK3
CLPTM1L
CMC2
CMTM2
CNKSR3
CNOT4
CNOT9
CNST
CNTN6
COA4
COL12A1
COL15A1
COL24A1
COL4A1
COLEC11
COMT
COQ10B
CORO1A
CORO1C
COX19
COX7A1
CPEB4
CPM
CPNE8
CPSF7
CRACDL
CRADD
CREB3L2
CREB5
CRELD1
CRHBP
CRIM1
CRIP2
CRISPLD2
CRK
CRLF3
CRTAP
CRY1
CRYAB
CSDE1
CSF1
CSF2
CSF3
CSF3R
CSNK1A1
CSNK1D
CSRNP1
CSRNP2
CSTA
CSTF1
CTNNB1
CTRC
CTSL
CTTNBP2NL
CTU2
CWC25
CX3CL1
CXCL1
CXCL2
CXCL5
CXCL8
CXCR1
CXCR2
CXCR4
CYB5D1
CYCS
CYP26A1
CYP27B1
CYP46A1
CYP4B1
CYSLTR1
CYSTM1
CYTH1
CYTH2
CYTOR
DAB2IP
DACT1
DAW1
DBNDD1
DCAF1
DCAF4L2
DCP1A
DCUN1D3
DCUN1D5
DDX20
DDX21
DDX24
DDX39A
DDX3X
DDX42
DDX43
DDX5
DDX54
DDX59
DECR2
DEDD
DEFA1
DEFA1B
DEFA3
DEFB103A
DEFB103B
DEGS1
DENND1A
DENND3
DENND4A
DENND5A
DEPP1
DGKH
DHDDS
DHX15
DHX33
DHX34
DHX9
DIMT1
DIO2
DISC1
DIXDC1
DLEU2L
DMD
DMRT3
DMTN
DNAJA1
DNAJA4
DNAJB1
DNAJB12
DNAJB4
DNAJB5
DNAJB6
DNAJB9
DNAJC21
DNAJC27
DNM1L
DNAAF11
DNAAF4-CCPG1
DOC2B
DOCK11
DOCK6
DOK5
DOT1L
DPAGT1
DPEP3
DPH2
DPH3
DPY30
DUS4L-BCAP29
DUSP1
DUSP10
DUSP14
DUSP16
DUSP2
DUSP3
DUSP5
DUSP6
DYNC1I1
DYNLL1
DYNLL2
DYNLT5
DYRK1A
DYRK3
DYSF
E2F3
E2F6
E2F6P1
E2F6P2
E2F6P3
EAF1
EBNA1BP2
ECD
EDNRB
EEA1
EEF1AKMT4
EEF1B2
EFHD2
EFNB2
EGFL6
EGFL8
EGLN1
EGR1
EGR3
EHD1
EHD4
EHHADH
EID2
EID3
EIF1
EIF1B
EIF2S1
EIF3I
EIF3J
EIF4A1
EIF4A3
EIF4G1
EIF4G2
EIF5
ELF1
ELF2
ELF4
ELK3
ELK4
ELL
ELMO1
ELOA
ELOC
EMC6
EMP1
ENDOU
ENPP4
ENY2
EOGT
EPAS1
EPB41L4B
EPB42
EPCAM
EPDR1
EPHA10
EPHA2
EPHA4
EREG
ERF
ERICH1
ERN1
ERRFI1
ESAM
ESM1
ESPL1
ETF1
ETNK1
ETS1
ETS2
ETV3
EVA1C
EXD2
EXOG
EXOSC3
EZH2
EZR
F5
FADS3
FAM107A
FAM107B
FAM110D
FAM131A
FAM131B
FAM177A1
FAM199X
FAM210A
FAM234B
FAM43A
FAM53C
FAM91A1
FANCB
FAR2
FASTKD5
FAT1
FBXL20
FBXO11
FBXO22
FBXO28
FBXO30
FBXO34
FBXO7
FBXW7
FCAR
FCGR1A
FCGR1BP
FCGR2A
FCN1
FEM1A
FEM1B
FEM1C
FES
FFAR2
FGD4
FGF1
FGF13
FGF18
FGF5
FGFR1
FGL2
FGR
FILIP1L
FJX1
FKBP1A
FKBP1C
FKRP
FLOT1
FMNL2
FNDC4
FOLR3
FOS
FOSB
FOSL1
FOSL2
FOXC1
FOXH1
FOXK2
FOXO3
FPR1
FPR2
FRS2
FST
FSTL3
FTH1P7
FURIN
FUT1
FYN
FYTTD1
FZD5
G3BP1
GABARAPL1
GABPB1
GAD2
GADD45A
GADD45B
GAR1
GAREM1
GART
GASK1B
GATAD2A
GBP1
GCA
GCH1
GCLM
GCOM1
GEM
GFPT2
GGCX
GJA1
GJA4
GJA5
GK
GK4P
GLA
GLB1
GLRX
GLRX3
GLYAT
GMEB2
GMFB
GNA12
GNA13
GNA14
GNA15
GNAI3
GNE
GNG10
GNG2
GNG5
GNL2
GNL3
GNRH2
GOLPH3
GOSR2
GPAT4
GPATCH2L
GPATCH4
GPBAR1
GPC1
GPCPD1
GPLD1
GPN2
GPR132
GPR135
GPR183
GPR3
GPR4
GPR42
GPR75
GPR84
GPRC5A
GPX1
GPX1P1
GRAMD1A
GRB14
GRB2
GRHL1
GRPEL1
GRWD1
GSK3B
GTF2B
GTPBP4
GUCY1A2
H1-2
H2AC18
H2AC19
H2AC20
H2AC6
H2AX
H2AZ1
H2BC12
H2BC12L
H2BC21
H2BC4
H2BC5
H2BC6
H4C2
H4C5
H4C8
HAGH
HAL
HAPLN3
HAPSTR1
HAS1
HAS2
HAT1
HAUS8
HBB
HBD
HBEGF
HBG1
HBG2
HBM
HBQ1
HCAR2
HCAR3
HDGFL1
HDGFL3
HDLBP
HEATR1
HECW2
HELZ2
HES1
HES4
HEYL
HIBCH
HIC2
HIF1A
HIGD1A
HIGD1AP1
HIP1
HIPK2
HIPK3
HIVEP1
HK1
HLX
HMBS
HMGA1
HMGA1P2
HMGB1P3
HMOX1
HNRNPAB
HNRNPF
HNRNPM
HOMER1
HOXC4
HPCAL1
HPRT1
HSD11B1
HSF1
HSP90AA1
HSPA12A
HSPA1A
HSPA1B
HSPA4
HSPA8
HSPA9
HSPB8
HSPD1
HSPH1
HYAL2
ICAM1
ICAM2
ICAM3
ICAM4
ID2
ID3
IDH3A
IDI1
IDO1
IDS
IER2
IER3
IER5
IFI16
IFIT1B
IFIT3
IFITM2
IFITM3
IFNAR1
IFNAR2
IFRD1
IFRD2
IFT43
IGSF1
IGSF21
IL15
IL18RAP
IL1A
IL1B
IL1R1
IL1R2
IL1RAP
IL1RL1
IL1RL2
IL1RN
IL27RA
IL3RA
IL4R
IL5RA
IL6
IL6R
IL6ST
ILF2
ILRUN
INF2
ING5
INHBB
INKA2
INO80C
INPP1
INPP4A
INSIG1
INSYN1
INTS6
INTS7
INVS
IPO11
IPO4
IPO7
IPO7P2
IPPK
IQCJ-SCHIP1
IRAK2
IRAK3
IRF1
IRF7
IRF8
ISG20
ISG20L2
ITGA1
ITGA5
ITGAV
ITGB1
ITGB1P1
ITGB5
ITIH5
ITPK1
ITPKC
ITPR1
ITPRIP
IVNS1ABP
IWS1
JADE1
JAML
JMJD1C
JMJD6
JOSD1
JPH2
JUN
JUNB
JUND
KANK1
KAZN
KBTBD2
KBTBD8
KCMF1
KCNAB1
KCNB1
KCNIP3
KCNJ15
KCNJ2
KCNN2
KDM2B
KDM6B
KIF1B
KIF5B
KLC1
KLF10
KLF11
KLF2
KLF4
KLF6
KLF9
KLHL15
KLHL18
KLHL2
KLHL21
KLHL30
KLHL36
KLHL5
KMT2C
KPNA2
KPNA3
KPNA4
KPNA6
KTN1
LACTB
LAMA5
LAMB3
LAP3
LARP1B
LARP4
LAT2
LATS2
LBP
LBR
LCN2
LCN6
LCP2
LDB3
LDHA
LDLR
LEP
LGALS8
LGALSL
LHCGR
LHPP
LIF
LILRA1
LILRA2
LILRA5
LILRB2
LILRB3
LIMCH1
LIMK2
LIMS1
LINC00661
LIPG
LITAF
LMCD1
LMNA
LMNB1
LNPEP
LONRF1
LONRF2
LONRF3
LOX
LPAR2
LPGAT1
LRCH4
LRG1
LRRC32
LRRC8A
LRRC8C
LRRFIP2
LRRK2
LRRN2
LRWD1
LSM10
LSMEM1
LST1
LUZP1
LYAR
LYN
MAD2L1BP
MAFF
MAFG
MAFK
MAK
MAK16
MALL
MALLP1
MAN1A1
MANSC1
MAP1B
MAP1LC3A
MAP1LC3B
MAP2K1
MAP2K3
MAP3K7
MAP3K7CL
MAP3K8
MAP4
MAP7D1
MAPK1
MAPK10
MAPK1IP1L
MAPK6
MAPKAP1
MAPKAPK2
MAPRE1
MAPT
MARCHF2
MARCHF3
MARCKSL1
MARS2
MAT2A
MBOAT7
MCAT
MCEMP1
MCL1
MCMBP
MCTP1
MCTP2
MDFIC
MECR
MED13
MED13P1
MED19
MED26
MED8
MEDAG
MEGF9
MEMO1
MEMO1P1
MET
METRNL
METTL1
MEX3C
MFAP3
MGAT4A
MGP
MGST1
MID1
MID2
MIDEAS
MIDN
MIEF1
MIR1909
MIR22HG
MIR3064
MIR3658
MIR4435-2HG
MIR4467
MIR4658
MIR4668
MIR4741
MIR5047
MIR601
MIR6514
MIR7106
MIR8085
MIS12
MKNK1
MLF1
MLKL
MLLT1
MMD
MMP19
MMP25
MMP28
MMP3
MNDA
MOB3C
MOK
MON1B
MORC3
MPHOSPH6
MPRIP
MPZL2
MRAP
MRAS
MRPL50
MRPS12
MRPS17
MSANTD3
MSANTD3-TMEFF1
MSC
MSH5
MSH5-SAPCD1
MSI2
MSMO1
MSN
MSRB1
MSRB3
MSX1
MT1A
MT1E
MT1G
MT1H
MT1M
MT1X
MTA2
MTERF3
MTF1
MTHFD2
MTMR12
MTRF1L
MTUS1
MUC1
MX1
MX2
MXD1
MXRA7
MYADM
MYBPC3
MYC
MYCT1
MYEF2
MYEOV
MYL4
MYL9
MYO1C
MYO1E
MYO6
MYOC
MYZAP
NABP1
NACC2
NAF1
NAIP
NAMPT
NANOS1
NAP1L1
NAP1L5
NAPG
NAT8B
NCAM1
NCBP2
NCF1
NCF1B
NCF1C
NCF4
NCOA7
NDEL1
NDRG1
NDUFAF4
NDUFV3
NECTIN2
NEDD4
NEDD9
NEK6
NEK7
NEMF
NEU1
NEU4
NEXN
NFATC1
NFATC2
NFE2
NFE2L2
NFIL3
NFKB1
NFKB2
NFKBIB
NFKBID
NFKBIZ
NFYA
NGF
NGRN
NHLRC2
NIBAN2
NIP7
NIPA2
NLRP12
NLRP3
NME1
NMNAT2
NNAT
NNMT
NOC2L
NOCT
NOLC1
NOMO3
None
NOP16
NOP2
NOP56
NOP58
NOS3
NOTCH1
NOTCH3
NPB
NPC1
NPR3
NPTX2
NQO1
NR1H2
NR2E3
NR4A1
NR4A2
NR4A3
NR5A2
NRAS
NRCAM
NRP2
NSL1
NSUN2
NT5C2
NTM
NTMT1
NTRK2
NUAK2
NUDT14
NUDT5
NUFIP2
NUP153
NUP188
NUP50
NUP50P1
NUP58
NUP88
NUP98
NXF1
NXT1
NAA15
OAS2
OASL
ODC1
ODF2
OGFOD1
OGFRL1
OLR1
OPA3
OR1K1
OR2G3
OR51E1
OR5H6
OSER1
OSGIN1
OSM
OSMR
OSTM1
OTUD4
OTULIN
OXSR1
P2RX6P
P2RY13
P2RY2
PACSIN2
PADI4
PAFAH1B2
PAFAH1B2P1
PAIP1
PAIP1P2
PAK2
PALLD
PALM2AKAP2
PALS1
PALS2
PANX1
PANX2
PAPSS2
PARD6A
PBRM1
PCDH17
PCDH9
PCNX1
PCOLCE2
PCSK7
PDCD2
PDCL3
PDE12
PDE4B
PDE4D
PDGFA
PDLIM1
PDLIM3
PDLIM4
PDLIM5
PDLIM7
PDZD8
PEA15
PEDS1
PELI1
PELO
PEMT
PER2
PFKFB3
PGAM1
PGAM1P2
PGLYRP1
PGS1
PHACTR1
PHC2
PHC3
PHF20L1
PHLDA1
PHLDA2
PHLDB1
PHLPP2
PHYKPL
PI3
PI4KB
PIAS2
PICALM
PIGA
PIGK
PIK3C2A
PIK3R1
PILRA
PIM1
PIM3
PIR
PISD
PITPNA
PITPNB
PITPNC1
PITPNM1
PITRM1
PITX1
PKD2
PKD2L1
PLA2G4A
PLAGL2
PLAU
PLAUR
PLCXD1
PLCZ1
PLEKHA3
PLEKHG1
PLEKHG2
PLEKHO2
PLIN2
PLIN3
PLK3
PLOD2
PLPP1
PLSCR1
PLAAT5
PMAIP1
PMEPA1
PMF1-BGLAP
PMM2
PNO1
PNP
PNPLA8
PNRC1
POFUT2
POLR1C
POLR2D
POLR2L
POLR2M
POLR3D
POM121
PON2
POP1
POP5
POR
PPA1
PPARD
PPBP
PPFIA1
PPIF
PPIL1
PPM1B
PPM1D
PPP1R10
PPP1R15A
PPP1R15B
PPP2CA
PPP2CB
PPP2R1B
PPP2R2B
PPP2R5B
PPP3CC
PPP4R1
PPP6R2
PPRC1
PPT2
PPT2-EGFL8
PPTC7
PRDM1
PRELID3A
PRELID3B
PRICKLE2
PRKCQ
PROK2
PRPF18
PRPS1
PRRC2A
PRRG1
PRXL2C
PSAT1
PSG9
PSMA1
PSMC4
PSMD1
PSMD12
PSMD14
PSME3
PSME4
PSMG1
PTAFR
PTBP1
PTGER2
PTGER4
PTGS2
PTP4A3
PTPN1
PTPN11
PTPN12
PTPN21
PTPRB
PTPRE
PTRH1
PTRH2
PTS
PUM3
PURB
PUS1
PVR
PWP1
PXDC1
QSOX2
QTRT2
R3HDM4
RAB11FIP1
RAB21
RAB29
RAB2A
RAB30
RAB35
RAB3IP
RAB5A
RAB5C
RAB5IF
RAB6B
RABL3
RALGAPB
RALGDS
RAN
RANBP3L
RAPGEF4
RARA
RASA3
RASD1
RASIP1
RASSF1
RASSF5
RASSF8
RBBP6
RBBP8
RBM12
RBM14-RBM4
RBM15
RBM18
RBM24
RBM28
RBM3
RBM38
RBM39
RBM4
RBM7
RBMS1
RBMS1P1
RBPMS2
RCAN1
RCL1
RDH10
RDH5
REC8
RECQL
REG3A
REL
RELA
RELB
REM2
REPS2
RETSAT
REXO1
REXO2
RFX1
RFX2
RFX5
RGCC
RGL4
RGMB
RGN
RGPD1
RGPD2
RGPD5
RGPD6
RGPD8
RGS1
RGS11
RGS16
RGS18
RGS2
RGS4
RHBDF2
RHEB
RHEBP1
RHOA
RHOB
RHOC
RHOH
RHOJ
RHOQ
RHOXF1
RIC8B
RILPL2
RIOK1
RIOK3
RIPK1
RIPOR1
RIPOR2
RIT1
RLF
RMC1
RN7SK
RN7SKP80
RN7SL731P
RN7SL775P
RNASE2
RNASE8
RND1
RND3
RNF11
RNF122
RNF149
RNF152
RNF19A
RNF19B
RNF24
RNF44
RNF6
RNFT1
RNU6-646P
ROPN1L
RP2
RPGR
RPL29
RPL6
RPL7A
RPP38-DT
RPP40
RPS20P21
RPS26P19
RPS6KA3
RRAD
RRAGC
RRAS2
RRAS2P1
RRN3
RRP12
RRP15
RRP7BP
RRS1
RSPH3
RTEL1-TNFRSF6B
RTL6
RTN4
RUBCNL
RUFY4
RYBP
S100A10
S100A11
S100A12
S100A16
S100A8
S100A9
S100P
S1PR1
S1PR4
SAMD4A
SAMD8
SAMSN1
SAP30BP
SAR1B
SASH1
SAT1
SBNO2
SCAF11
SCAND1
SCHIP1
SCIN
SCML1
SCO2
SCP2
SCUBE2
SCYL2
SDC4
SDCBP
SDE2
SDS
SDSL
SEC14L1
SEC22C
SEC23B
SEH1L
SELE
SELENOW
SELL
SELP
SEMA3F
SEMA3G
SEMA4A
SEMA4D
SEMA6B
SENP2
SENP3-EIF4A1
SENP5
SERHL
SERPINA1
SERPINA13P
SERPINA3
SERPINB1
SERPINB10
SERPINB2
SERPINB8
SERPINE1
SERTAD1
SERTAD2
SERTAD3
SESN2
SETD3
SF1
SFPQ
SGCB
SGIP1
SGK1
SGMS1
SGMS2
SH2B2
SH3BGR
SH3BP2
SH3GLB1
SHB
SHC1
SHISA2
SHOC2
SIAE
SIDT1
SIGLEC10
SIGLEC5
SIK1
SIRPB1
SKI
SLAMF1
SLC10A6
SLC11A1
SLC16A10
SLC16A3
SLC19A2
SLC20A1
SLC22A12
SLC22A23
SLC22A4
SLC22A5
SLC25A19
SLC25A20
SLC25A24
SLC25A25
SLC25A28
SLC25A3
SLC25A34
SLC25A37
SLC25A44
SLC25A51
SLC2A11
SLC2A14
SLC30A1
SLC31A2
SLC35E4
SLC35F5
SLC35G1
SLC37A3
SLC38A10
SLC38A2
SLC39A12
SLC39A14
SLC41A1
SLC41A2
SLC4A1
SLC5A11
SLC5A6
SLC7A1
SLC7A4
SLC7A5
SLC7A5P2
SLC9A4
SLC9B2
SLCO2A1
SLCO3A1
SLCO4A1
SMAD7
SMG1P2
SMG5
SMIM12
SMIM43
SMOX
SMPD1
SMURF1
SMYD2
SNAI1
SNCA
SNCG
SNIP1
SNORA1
SNORA25
SNORA32
SNORA51
SNORA67
SNORA8
SNORD10
SNORD14C
SNORD14D
SNORD14E
SNORD24
SNORD36A
SNORD36B
SNORD36C
SNORD56
SNORD57
SNORD6
SNORD86
SNORD97
SNRPB
SNU13
SNX25
SOCS1
SOCS2
SOCS3
SOCS4
SOD2
SON
SORBS1
SORL1
SOS1
SOX11
SOX17
SOX7
SOX8
SP100
SPACA9
SPAG9
SPATA2L
SPG21
SPHK1
SPIN2B
SPMIP6
SPRED1
SPRTN
SPRY1
SPRY4
SPSB1
SPTA1
SPTBN1
SPTY2D1
SQLE
SQSTM1
SRF
SRFBP1
SRGN
SRI
SRP19
SRPX2
SRSF10
SRSF2
SRSF4
SRXN1
SSH1
ST3GAL1
ST8SIA4
STARD13
STARD8
STAT1
STAT3
STAU1
STC1
STC2
STEAP4
STIM1
STIMATE
STIMATE-MUSTN1
STING1
STIP1
STK35
STK38L
STK40
STOM
STPG4
STRAP
STRN
STRN3
STS
STX11
STX2
STX5
STXBP5
SUSD6
SWAP70
SYN2
SYNC
SYNCRIP
SYNGR3
SYNJ2
SYTL4
SZRD1
SAA1
SAA2
TAC1
TACC2
TADA2A
TAF13
TAF1B
TAF1D
TAF2
TAF5L
TAF7
TAF8
TAGAP
TAGLN
TAGLN2
TAMALIN
TAOK2
TAP1
TAP2
TARS1
TBC1D15
TBC1D3P1-DHX40P1
TBC1D9
TBCK
TBXA2R
TCAIM
TCF15
TCIM
TCN1
TCP1
TEAD2
TEAD3
TEAD4
TENT4A
TES
TFB2M
TFDP1
TFE3
TFIP11
TFPI2
TGFB1
TGIF1
TGIF2-RAB5IF
TGM2
THBD
THBS1
TICAM1
TIGAR
TIMM17A
TIMM23
TINAGL1
TIPARP
TIPRL
TJP2
TLCD4
TLE1
TLE2
TLNRD1
TLR8
TM4SF1
TM4SF18
TMED5
TMEFF1
TMEM139
TMEM154
TMEM158
TMEM165
TMEM170A
TMEM184B
TMEM185B
TMEM41A
TMEM54
TMEM70
TMEM71
TMEM87B
TMEM88
TMF1
TMPPE
TMPRSS12
TMPRSS3
TMTC1
TMTC2
TNC
TNF
TNFAIP1
TNFAIP3
TNFRSF10A
TNFRSF10B
TNFRSF10D
TNFRSF11B
TNFRSF12A
TNFRSF1A
TNFRSF1B
TNFRSF4
TNFRSF6B
TNFSF14
TNIP1
TNIP2
TNIP3
TNMD
TNPO1
TOB1
TOMM40L
TOP1
TOR1AIP2
TOR3A
TP53BP2
TP53INP2
TPD52L1
TPM3
TPPP2
TPST2
TRA2B
TRAF3IP2
TRAF4
TRAK1
TRAPPC14
TRAPPC2B
TREM1
TREML2
TRIB1
TRIM16
TRIM21
TRIM33
TRIM36
TRIM58
TRPC6
TRPM6
TSC22D1
TSC22D2
TSSC4
TTF2
TTLL13
TUBB2A
TUBB3
TUBB4B
TUBB6
TUBB7P
TUSC1
TUSC2
TUT7
TXLNA
TXN
TXNRD1
TYRO3P
UAP1
UBA1
UBA6
UBALD1
UBALD2
UBAP1
UBASH3B
UBC
UBE2A
UBE2D3
UBE2D4
UBE2E1
UBE2G1
UBE2H
UBE2L3
UBE2T
UBFD1
UBQLN1
[truncated: 123 more rows]

## Sheet: Reduced after BS Bioplanet
Term	Overlap	P-value	Adjusted P-value	Odds Ratio	Combined Score	Genes
Interleukin-2 signaling pathway	221/847	8.97994e-39	1.21409e-35	3.202	280.514	IFITM3;TES;SERPINE1;ICAM1;RPS6KA3;MYC;NAMPT;BCAP29;TRIM21;IER3;EPHA4;IL1R1;MTHFD2;MALL;MT1H;TAGLN2;GPLD1;ATF4;MT1E;MGST1;NOLC1;PIK3R1;TXN;GNG10;S100A11;CDR2;SLAMF1;LYN;CDK17;JUN;XBP1;JUND;LIF;PPBP;LARP4;EIF1;FOSL2;EHD1;SQLE;UCK2;VNN2;ID2;GPR183;AGO2;REL;ID3;PEMT;GRB2;EZH2;BTG3;BTG1;LITAF;CCR7;DUSP5;DUSP3;DUSP1;MMD;RRAS2;FOS;JOSD1;PPRC1;DUSP6;RHOA;NME1;SLC7A5;CEACAM1;MDFIC;IL1B;MAPT;VAMP4;SGK1;PPA…
Interleukin-5 regulation of apoptosis	78/144	2.24779e-38	1.51951e-35	10.2931	892.29	CXCL8;IL5RA;MT1X;CXCL1;CXCL2;ICAM1;LMNB1;CCND3;RGS2;CASP4;PIM1;PDE4B;UPP1;MAP3K7;IER2;IER3;DUSP5;CHUK;ANXA3;RHOH;FOS;DUSP6;IL1A;CEACAM1;SFPQ;IL1B;IL3RA;LCP2;SGK1;CD44;ATF4;IDO1;BIRC3;HBEGF;IDI1;SDC4;SRF;PTAFR;ITPR1;SRI;PTGS2;HIF1A;ZFP36L2;RELA;RELB;RAB21;IL1RL1;SOCS1;NFIL3;HLX;MKNK1;P2RY2;CCL3;CCL2;HAS2;DMD;MAPK6;CD55;EGR1;EGR3;GK;GADD45A;LIMK2;TFPI2;SOD2;SELE;NFKB1;FOSL2;NFKB2;PRRC2A;SELP;IL6;ID…
T cell receptor regulation of apoptosis	156/603	5.18283e-27	2.33573e-24	3.0925	187.172	IFITM3;CD86;CSF3;IL1RN;CSF2;AHCYL1;CD83;TRAF3IP2;CCL4L2;IL1RAP;TNF;RPL6;ETS2;IL27RA;CCND3;PNP;CCND2;CCND1;MYC;NAMPT;PIM1;MAP3K8;LGALS8;JUNB;IER2;IER3;RAB2A;IL1R1;IFRD2;TAP1;TICAM1;ILF2;GTPBP4;CH25H;CLIP1;PPA1;VDAC1;LAP3;ATF3;NAIP;ATF4;IFNAR1;SNRPB;PSMD12;SHC1;EPAS1;NOP2;ISG20L2;ADRB2;BCL2L12;TP53BP2;NLRP3;PMAIP1;S100A10;MCL1;HSPA9;PLK3;EGR1;HSPA8;JUN;JUND;EGR3;TGFB1;GADD45B;TFPI2;TNFRSF10B;NFATC1…
EGFR1 pathway	60/152	1.09474e-20	3.70023e-18	5.62235	258.41	CDKN1A;BTG1;CSF1;ITGB5;PPP1R10;MT1M;AMD1;MT1X;PNP;CCND1;PLAU;MYC;PHLDA2;PHLDA1;IER3;IL4R;ANXA1;DUSP1;HPCAL1;PLAUR;ARID5B;EMP1;DUSP6;EREG;ESPL1;MT1G;MT1H;HPRT1;MAPT;SQSTM1;CRYAB;MET;VCL;HBEGF;PRPS1;TAGLN;SDC4;SLC20A1;DDX21;CORO1A;ZFP36L2;ZFP36L1;CDC42;HAS2;PDLIM4;NOP56;GADD45A;LIF;UBE2A;HNRNPAB;VEGFA;CDK9;CLK1;EHD1;NR4A3;BCL6;LCN2;CYCS;ID3;GRB2
Oncostatin M	92/311	1.46528e-20	3.9621e-18	3.65237	166.803	CDA;SERPINA3;CDKN1A;CSF3;DYRK3;CSF2;CXCL8;SERPINE1;TNC;CXCL1;PRDM1;CXCL2;ETS2;CXCL5;ICAM1;ADAMTS4;UPK1A;CCND1;PLAU;MYC;KIF5B;NAMPT;CASP4;ITGAV;DNM1L;JUNB;SLC16A3;CAMP;IER3;TGM2;KLF10;SERPINB1;ANXA1;SERPINB2;IL4R;IL1R1;ANXA3;MMP3;PLAUR;PLA2G4A;OSMR;CH25H;IRF1;MT1H;IL6ST;GART;S100A9;ATF3;S100A8;MT1E;PPARD;BEX1;CEBPD;EPAS1;RRAD;RGS16;PDGFA;BCL10;PTGS2;HIF1A;STX11;HSD11B1;HCAR3;SOCS3;LDHA;NRAS;SOCS1;…
BDNF signaling pathway	81/261	1.15442e-19	2.6013e-17	3.89993	170.058	BTG2;CDKN1A;IFITM2;BTG1;TRAF3IP2;ITGB5;WDR1;SCHIP1;SERPINE1;ADM;RND3;RGS2;ZFP36;PPP2R1B;MYC;BDKRB2;PDE4B;UPP1;PHLDA2;JUNB;IER2;KLF10;DUSP5;MAP2K1;DUSP1;HPCAL1;RECQL;FOS;SLC39A14;GEM;JMJD6;RHOB;SLC7A5;UGDH;SFPQ;CDC42EP4;RBMS1;ATF3;VCL;FOXC1;TAGLN;INPP1;PTGER2;INSIG1;PTGS2;FOXO3;STIP1;DNAJB1;PDLIM3;DNAJB5;LMNA;PDLIM4;S100A11;S100A10;EGR1;NQO1;HSPA8;JUN;XBP1;EGR3;GCH1;GADD45A;FEM1B;TFPI2;AKR1C3;VEGF…
Immune system signaling by interferons, interleukins, prolactin, and growth hormones	82/280	3.57487e-18	6.9046e-16	3.58726	144.11	IFITM3;EIF4A1;IL1RN;IFITM2;CSF2;NUP188;YWHAB;EIF4A3;IL5RA;IL1RAP;IFIT3;ICAM1;OASL;KPNA4;MAP3K8;ARIH1;KPNA2;IL6R;KPNA3;MAP3K7;IFNAR2;MAP2K1;CHUK;IL1R1;IL1R2;UBE2E1;IRAK3;IL1A;ADAM17;PPM1B;OAS2;IL1B;IRF1;NUP50;IL3RA;PELI1;IRF7;IRF8;NUP98;IL6ST;SOS1;SQSTM1;CRK;CD44;IFNAR1;POM121;SP100;SEH1L;SHC1;PTAFR;PIK3R1;RELA;SOCS2;SOCS3;NRAS;SOCS1;IRAK2;UBC;MAPK1;NUP88;FYN;NCAM1;FCGR1A;GBP1;LYN;EGR1;PTPN1;STAT1…
Interleukin-1 regulation of extracellular matrix	48/120	4.17864e-17	7.0619e-15	5.72048	215.742	ATF2;CSF3;IL1RN;CSF2;CXCL8;CFH;RRAD;TNFAIP3;TNFRSF11B;CXCL1;PTGS2;TNF;CXCL2;CXCL5;RELA;ICAM1;RGS4;HSD11B1;ZFP36;SCIN;CCL8;SLC25A28;NAMPT;CCL2;KDM6B;SRGN;JUN;SERPINB2;CCL20;IL1R2;TXNRD1;MMP3;LIF;FOS;SOD2;NFKB1;DUSP6;RHOB;FOSL1;IL1A;BMP2;IL6;NR4A3;LOX;IL1B;SAA2;BIRC3;HBEGF
Immune system	190/998	2.96844e-16	4.45926e-14	2.07644	74.2395	CD86;IFITM3;ATF2;EIF4A1;IL1RN;CSF2;IFITM2;NCF1;UBE2D4;NUP188;NCF4;UBE2D3;EIF4A3;ICAM2;ICAM3;IL5RA;RNF19B;ICAM4;CBLB;IL1RAP;PVR;IFIT3;ICAM1;UBE2L3;C4A;RPS6KA3;PPP2R1B;KIF5B;PSMD1;KPNA4;MAP3K8;KPNA2;KPNA3;MAP3K7;TRIM21;IL6R;IFNAR2;MAP2K3;MAP2K1;FBXW7;IL1R1;IL1R2;UBE2E1;TAP2;TAP1;TICAM1;ADAM17;STIM1;PSME3;PSME4;MAPKAPK2;PRKCQ;NUP98;IL6ST;SQSTM1;IFNAR1;DEFB103A;CD274;PSMD12;POM121;SEH1L;PSMD14;CFH;SA…
FSH regulation of apoptosis	75/263	4.87582e-16	6.5921e-14	3.44569	121.485	IFITM3;ZNF331;POP5;SERPINA3;DYRK3;IFITM2;ITGB5;ATP2A2;PTPN21;MT1X;MSMO1;VLDLR;YBX3;CX3CL1;DUSP14;AKAP12;RGS4;CASP9;CASP4;PSMD1;UPP1;MAP3K7;IER3;MAP2K3;RAB2A;KLF10;LHCGR;MAP2K1;DUSP3;CHUK;DUSP1;IL15;FST;PPP2R5B;EMP1;GEM;EREG;JMJD6;RHOB;CH25H;ARC;GPRC5A;EZR;SGK1;VCL;COL15A1;RAB5C;PTGER2;RGS16;ITPR1;TNFRSF11B;COX7A1;THBS1;PAPSS2;HSD11B1;PMAIP1;FILIP1L;MAPK6;LDLR;GBP1;CD55;CAP2;PTPN1;YTHDF2;GK;ANGPT1…
TGF-beta signaling pathway	60/185	6.55896e-16	8.06156e-14	4.13037	144.4	ITGB1;ATF2;SERPINE1;ETS1;TNF;CCND1;MYC;SNIP1;JUNB;MAP3K7;MAP2K3;KLF10;TGIF1;KLF11;MAP2K1;FST;FOXH1;TFE3;FOS;PIAS2;RHOA;EID2;TFDP1;STRAP;SIK1;SOS1;ATF3;PPP1R15A;SHC1;NEDD9;PIK3R1;THBS1;CDC42;PPP2CA;PPP2CB;PARD6A;MAPK1;MAPK6;PAK2;SPTBN1;JUN;JUND;TGFB1;SMURF1;STAT1;LIMK2;STAT3;LIF;NUP153;NFKB1;SMAD7;FKBP1A;MAPK10;SKI;KLF6;BAMBI;CTNNB1;FOSB;GRB2;BCAR1
Interleukin-4 regulation of apoptosis	75/267	1.19708e-15	1.34871e-13	3.37315	115.898	CD86;CPM;IL1RN;CDKN1A;CXCL8;HSPB8;TNC;RNF19B;LITAF;TNF;CXCL2;CYSLTR1;RGS2;CTSL;GJA5;MYC;CASP3;GJA4;UPP1;DACT1;ANXA1;IL4R;MMP3;HPCAL1;ARID5B;FOS;RNASE2;DUSP6;GEM;CH25H;LOX;DOK5;ALDH1A2;RBMS1;SOS1;FJX1;MET;CHST2;SLC22A4;KLHL18;FOXC1;CEBPB;NNMT;PTGER2;FGL2;CXCR4;PTGS2;NFIL3;IFI16;ALOX5;TP53BP2;S1PR1;CCL2;KCNN2;DMD;CYTH1;HSPA8;JUN;GADD45B;CCL20;STAT1;DENND4A;MX1;SELE;BMP2;IL6;CLCN4;BCL6;CCPG1;GPR183;…
TGF-beta regulation of extracellular matrix	124/565	1.59583e-15	1.65967e-13	2.45255	83.5616	CSF1;SERPINE1;TNC;PLOD2;AHR;SAT1;IFIT3;ETS2;RGS4;CYSLTR1;RGS2;CCND1;MYC;PIM1;NRCAM;JUNB;MAP2K1;IL1R1;PUS1;ARID5A;TAP1;MID1;TM4SF1;LOX;MTHFD2;PPA1;ATF3;NAIP;IDO1;EPHA2;IDI1;SDC4;SHC1;INSIG1;NPR3;MGST1;PDGFA;STC1;PIK3R1;UGCG;SDCBP;NPTX2;S100A11;S100A10;IVNS1ABP;TGFB1;DENND4A;TFPI2;CDC7;ZNF35;SMAD7;FOSL1;CLK1;RCAN1;UCK2;IL6;BAMBI;ID2;FGF18;LCN2;PIR;BCL2L1;SERPINA3;NRP2;CELF2;DDX43;TNFAIP3;CXCL1;UCHL…
TSH regulation of gene expression	39/97	2.9849e-14	2.88256e-12	5.7494	179.051	BCAR3;PPP1R15A;NOTCH3;PHLDB1;NOTCH1;CXCL8;CSF1;SCHIP1;RGS16;ATP2A2;TNFAIP3;ADM;AHR;TTF2;PIK3R1;PTGS2;SMG5;STX11;ICAM1;RGS2;ADAMTS1;MYC;TP53BP2;CCL2;PXDC1;HES1;EGR1;JUN;DUSP2;GADD45B;EMP1;VEGFC;FOS;CTTNBP2NL;VEGFA;VMP1;NR4A1;NR4A3;CLC
Interleukin-1 signaling pathway	45/125	3.93595e-14	3.54761e-12	4.81752	148.698	ATF2;IL1RN;CXCL8;UBE2D4;UBE2D3;TNFAIP3;IL1RAP;PIK3R1;PTGS2;RELA;UBE2L3;ELK4;ZFP36;IRAK2;CCL2;MAPK1;MAP3K8;MAPK6;MAP3K7;MAP2K3;MAP2K1;JUN;UBE2H;CHUK;IL1R1;DUSP1;IL1R2;UBE2E1;IRAK3;PTPN11;UBE2G1;UBE2A;FOS;NFKB1;MAPK10;IL1A;IL6;TNIP2;UBE2T;IL1B;MAPKAPK2;REL;PELI1;SQSTM1;NFKBIB
TNF-alpha effects on cytokine activity, cell motility, and apoptosis	47/135	4.59901e-14	3.88616e-12	4.57656	140.548	DEFB103B;CSF3;IL1RN;CD83;CSF2;GMFB;NOTCH1;CXCL8;CSF1;ITPR1;TNFAIP3;CXCL1;ETS1;TNF;CXCL2;CX3CL1;ICAM1;RND1;RELB;HAS1;CXCR2;PMAIP1;CCL2;IFNAR2;GPX1;ANGPT1;IL1R2;SPHK1;TFPI2;SAMD4A;TNFRSF10B;SYNGR3;SOD2;SELE;NFKB2;SELP;IL1A;IL6;TRAF4;IL1B;IRF1;LCP2;ITGA5;CD69;CD44;BIRC3;HBEGF
Leptin influence on immune response	39/110	3.38583e-12	2.63318e-10	4.69326	123.956	IL1RN;CSF3R;NCF4;PTAFR;FPR1;CXCR4;TNFRSF11B;CXCL1;IL1RAP;TNF;CX3CL1;SOCS3;BGLAP;BDKRB1;CCL2;CCR7;TAC1;SOCS4;SNCA;IL15;LIF;PPBP;FOS;NFKB1;BATF;VEGFA;SELP;BST1;IL6;CEACAM1;SELL;OAS2;IL1B;ALOX5AP;BCL2;IRF8;TLR8;MNDA;IFNAR1
MAPK signaling pathway	76/314	3.50571e-12	2.63318e-10	2.75165	72.5792	ATF2;FGF1;TNF;DUSP16;DUSP14;ELK4;FGF5;CASP9;RPS6KA3;PPP3CC;DUSP10;MYC;CASP3;MAP3K8;MAP3K7;MAP2K3;DUSP5;DUSP2;MAP2K1;DUSP3;CHUK;IL1R1;DUSP1;CACNA2D1;IL1R2;RRAS2;PLA2G4A;FOS;NGF;DUSP6;TNFRSF1A;IL1A;PPM1B;MRAS;RASA3;IL1B;MAPKAPK2;MAPT;SOS1;CRK;ATF4;SHC1;SRF;PDGFA;ACVR1B;RELA;RELB;CDC42;NRAS;MKNK1;GNA12;MAPK1;RIPK1;MAPK6;RALGDS;PAK2;HSPA8;NTRK2;JUN;JUND;TGFB1;GADD45B;GADD45A;STAT1;NFATC2;NFKB1;NFKB2;…
FRA pathway	21/37	7.60533e-12	5.4118e-10	11.1525	285.528	JUN;CXCL8;JUND;NOS3;LIF;PLAUR;NFATC2;NFATC1;FOSL2;FOSL1;THBD;GJA1;IL6;CCND1;BGLAP;PLAU;MGP;CCL2;HMOX1;JUNB;ATF4
Signaling by interleukins	38/109	1.15291e-11	7.79367e-10	4.57073	115.119	IL1RN;CSF2;SHC1;YWHAB;IL5RA;IL1RAP;PIK3R1;RELA;SOCS3;NRAS;IRAK2;MAPK1;MAP3K8;FYN;IL6R;MAP3K7;LYN;MAP2K1;CHUK;IL1R1;STAT1;IL1R2;STAT3;IRAK3;PTPN11;NFKB1;NFKB2;IL1A;IL6;TNIP2;IL1B;IL3RA;PELI1;GRB2;IL6ST;SOS1;SQSTM1;CRK
Hemostasis pathway	98/468	2.7606e-11	1.7773e-09	2.28987	55.6736	SERPINE1;JMJD1C;DOCK11;GRB14;PPP2R1B;PLAU;KIF5B;SLC16A3;GUCY1A2;ATP1B3;ACTN4;STIM1;PRKCQ;VCL;DGKH;SHC1;ITPR1;PDGFA;PIK3R1;KLC1;GNG10;TBXA2R;ABL1;LYN;NFE2;TGFB1;HBG2;HBG1;PPBP;EHD1;SELP;SELL;MAFG;CDK2;MAFF;ESAM;MAFK;GRB2;CALM1;RAB5A;ITGB1;DOCK6;SERPINA1;WDR1;HBB;ATP2A2;HBD;TREM1;THBD;OLR1;ITGAV;SRGN;SERPINB2;TRPC6;VWF;ITPK1;PLAUR;PPP2R5B;PLA2G4A;ADRA2A;RHOA;F5;RHOB;FGR;SLC7A5;IRF1;IRF7;LCP2;ITGA5;…
Gastrin pathway	21/44	5.68478e-10	3.49356e-08	7.75522	165.094	ITGB1;JUN;CXCL8;SERPINB2;SERPINE1;TNC;FOS;PTGS2;KLF4;NFKB1;VEGFA;FOSL1;CCND1;BCL2;CTNNB1;HES1;ITGAV;CD44;IER3;BIRC3;HBEGF
Leptin signaling pathway	25/61	7.52967e-10	4.42614e-08	5.90543	124.055	IL1RN;SHC1;PIK3R1;RELA;CDC42;SOCS2;SOCS3;CCND1;MAPK1;KPNA4;FYN;PTPN1;MAP2K1;CHUK;STAT1;STAT3;PTPN11;RHOA;NFKB1;IL1B;LEP;REL;GRB2;SOS1;BCL2L1
AP-1 transcription factor network	27/70	8.0933e-10	4.55923e-08	5.3426	111.846	ATF2;CSF2;CXCL8;ETS1;HIF1A;GJA1;CCND1;PLAU;MYC;CCL2;JUNB;EGR1;JUN;JUND;TGFB1;DUSP1;NFATC2;NFATC1;FOS;FOSL2;FOSL1;ELF1;IL6;MAFG;CTNNB1;FOSB;ATF3
Interleukin-6 signaling pathway	27/71	1.17451e-09	6.35175e-08	5.22089	107.354	GSK3B;CEBPB;CEBPD;SHC1;SRF;PRDM1;PIK3R1;SOCS3;MYC;MAPK1;LBP;IL6R;JUNB;MCL1;MAP2K1;JUN;STAT1;STAT3;PTPN11;FOS;PTPRE;IL6;IRF1;GRB2;IL6ST;SOS1;BCL2L1
Toll receptor cascades	44/159	1.53286e-09	7.97086e-08	3.26883	66.3446	ATF2;UBE2D4;UBE2D3;TNFAIP3;RELA;UBE2L3;EEA1;PPP2CA;RPS6KA3;PPP2CB;PPP2R1B;IRAK2;CTSL;UBC;S100A12;MAPK1;MAP3K8;RIPK1;LBP;PGLYRP1;MAP3K7;MAP2K3;MAP2K1;JUN;UBE2H;DUSP3;CHUK;UBE2E1;IRAK3;UBE2G1;UBE2A;FOS;TICAM1;NFKB1;DUSP6;NFKB2;MAPK10;UBE2T;MAPKAPK2;IRF7;PELI1;SAA1;TLR8;NFKBIB
ATM-dependent DNA damage response	29/82	2.10393e-09	1.05352e-07	4.65748	93.0539	GSK3B;CDKN1A;WNT2B;SHC1;FOXO3;CDC42;CCND3;CCND2;CCND1;SCP2;PLAU;MYC;ABL1;MAPK1;PMAIP1;MAP3K7;LDLR;JUN;TGFB1;MLKL;SOD2;RHOA;FOSL1;MAPK10;BCL6;BCL2;CTNNB1;GRB2;SOS1
Interferon signaling	45/168	3.09997e-09	1.49684e-07	3.12578	61.2398	IFITM3;EIF4A1;POM121;SP100;IFITM2;SEH1L;NUP188;EIF4A3;PTAFR;IFIT3;ICAM1;OASL;SOCS3;SOCS1;UBC;KPNA4;NUP88;NCAM1;ARIH1;KPNA2;FCGR1A;KPNA3;GBP1;IFNAR2;EGR1;PTPN1;STAT1;MX2;MX1;UBE2E1;NUP153;PTPN11;ISG20;PPM1B;OAS2;IRF1;NUP50;NEDD4;IRF7;IRF8;NUP98;EIF4G2;CD44;IFNAR1;EIF4G1
Apoptosis	57/242	5.05994e-09	2.35898e-07	2.63846	50.3995	YWHAB;IL1RAP;TNF;LMNB1;CASP9;PPP3CC;MYC;CASP3;CASP4;PSMD1;DNM1L;CHUK;IL1R1;IRAK3;DYNLL1;NGF;TNFRSF1B;DYNLL2;TNFRSF1A;IL1A;TFDP1;PSMA1;PSME3;IL1B;IRF1;PSME4;IL3RA;IRF7;PRKCQ;MAPT;BIRC3;PSMD12;PSMD14;PIK3R1;RELA;IRAK2;LMNA;UBC;PMAIP1;RIPK1;PAK2;MCL1;JUN;CRADD;TNFRSF10B;TNFRSF10A;EXOG;NFKB1;TNFRSF10D;MAPK10;PSMC4;BCL2;CTNNB1;CYCS;TJP2;BCL2L1;NFKBIB
Pathways in cancer	70/325	5.56914e-09	2.50983e-07	2.35626	44.7832	ITGB1;GSK3B;CDKN1A;CSF3R;CXCL8;WNT2B;CBLB;FGF1;ETS1;FGF5;CASP9;RASSF1;CCND1;MYC;RASSF5;CASP3;ITGAV;MAP2K1;HSP90AA1;CHUK;TPM3;FOS;RHOA;PIAS2;BCR;TRAF4;COL4A1;RARA;SOS1;CRK;MET;PPARD;BIRC3;LAMA5;EPAS1;PDGFA;PIK3R1;PTGS2;HIF1A;RELA;CDC42;NRAS;ABL1;MAPK1;E2F3;RALGDS;EGLN1;JUN;CDKN2B;TGFB1;FZD5;LAMB3;STAT1;STAT3;VEGFC;NFKB1;VEGFA;NFKB2;MAPK10;BMP2;IL6;CDK2;FGF18;BCL2;CTNNB1;CYCS;GRB2;FGF13;BCL2L1;FGFR1
Angiopoietin receptor Tie2-mediated signaling	21/49	6.51708e-09	2.75347e-07	6.36858	120.04	ITGB1;CDKN1A;ANGPT2;ANGPT1;SHC1;NOS3;PTPN11;PIK3R1;ETS1;TNF;RELA;NFKB1;ELF1;ELF2;GRB14;FES;MAPK1;FYN;GRB2;ITGA5;CRK
Interleukin-5 signaling pathway	21/49	6.51708e-09	2.75347e-07	6.36858	120.04	LYN;GSK3B;MAP2K1;JUN;SHC1;STAT1;STAT3;IL5RA;PTPN11;FOS;PIK3R1;FOXO3;SPRED1;IL6;MYC;IL1B;BCL2;MAPK1;GRB2;MAPT;SOS1
Interleukin-3 signaling pathway	20/45	6.93273e-09	2.84032e-07	6.79106	127.584	CD86;LYN;JUN;MAP2K1;CXCL8;TGFB1;SHC1;STAT3;IL5RA;PTPN11;PIK3R1;FOS;IL3RA;BCL2;MAPK1;FYN;GRB2;CD69;SOS1;BCL2L1
Cytokine-cytokine receptor interaction	60/265	9.84081e-09	3.91317e-07	2.50717	46.224	CSF3;TNFRSF6B;CSF2;CSF3R;CXCL8;CSF1;CCL4L2;IL5RA;CXCL1;IL1RAP;TNF;CXCL2;CX3CL1;CXCL5;IL18RAP;CCR7;IL6R;TNFRSF4;IFNAR2;IL4R;TNFRSF12A;IL1R1;IL15;IL1R2;OSMR;TNFRSF1B;TNFRSF1A;IL1A;IL1B;IL3RA;PLEKHO2;IL6ST;MET;IFNAR1;CCL3L3;PDGFA;CXCR4;TNFRSF11B;ACVR1B;CCL8;CXCR1;CXCR2;CCL3;CCL2;TGFB1;TNFSF14;CCL20;LIF;OSM;VEGFC;TNFRSF10B;INHBB;TNFRSF10A;PPBP;VEGFA;TNFRSF10D;BMP2;IL6;CLCF1;LEP
PDGFB signaling pathway	37/129	1.052e-08	4.06371e-07	3.42889	62.9887	TAGLN;SHC1;YWHAB;SRF;PIK3R1;PPP2CA;RPS6KA3;NRAS;MYC;ABL1;S1PR1;MAPK1;ITGAV;FYN;YWHAG;YWHAH;LYN;PTPN1;MAP2K1;JUN;JUND;STAT1;SPHK1;STAT3;PLA2G4A;PTPN11;ACTN4;FOS;RHOA;FGR;MAPK10;PPP2R2B;GRB2;SOS1;RAB5A;CRK;BCAR1
Senescence and autophagy	31/99	1.68714e-08	6.33616e-07	3.88088	69.4587	GSK3B;CDKN1A;CEBPB;CXCL8;SERPINE1;CXCL1;THBS1;MAP1LC3B;MAP1LC3A;IFI16;CCL3;MAPK1;IL6R;MAP2K3;SH3GLB1;GABARAPL1;MAP2K1;JUN;TGFB1;SERPINB2;HMGA1;IL1A;BMP2;IL6;IL1B;IRF1;BCL2;IRF7;IL6ST;SQSTM1;CD44
LPA receptor mediated events	24/65	1.92006e-08	7.01601e-07	4.97408	88.381	LYN;GSK3B;JUN;CXCL8;GNAI3;LPAR2;ADCY2;FOS;PIK3R1;RHOA;RELA;NFKB1;GNA13;GNA14;GNA15;IL6;GNG2;CASP3;GNA12;ARHGEF1;MAPT;CRK;BCAR1;HBEGF
TNF-alpha signaling pathway	31/101	2.85235e-08	1.01483e-06	3.76958	65.4871	TNFAIP3;TXN;TNF;RELA;CASP9;PPP2CA;CASP3;SMPD1;MAPK1;MAP3K8;RIPK1;MAP3K7;MAP2K3;JUN;HSP90AA1;CHUK;STAT1;TNFRSF1B;NFKB1;NFKB2;TNFRSF1A;ADAM17;IL6;CDC37;REL;GRB2;SOS1;SQSTM1;BCL2L1;NFKBIB;BIRC3
GM-CSF-mediated signaling events	17/36	3.07243e-08	1.06511e-06	7.58699	131.241	LYN;MAP2K1;CSF2;SHC1;STAT1;STAT3;OSM;PTPN11;PIK3R1;FOS;NRAS;PIM1;CCL2;MAPK1;IRF8;GRB2;SOS1
ATF2 transcription factor network	22/59	6.06406e-08	2.04318e-06	5.04882	83.9028	ATF2;DUSP5;JUN;CXCL8;JUND;COL24A1;HBG2;DUSP1;GADD45A;FOS;SELE;SOCS3;IL6;DUSP10;CCND1;PLAU;BCL2;MAPK1;HES1;JUNB;ATF3;BCL2L1
Interleukin-9 regulation of target genes	14/26	6.19603e-08	2.04318e-06	9.88265	164.02	CDKN2D;IL5RA;SOCS2;SOCS3;SCIN;MRAS;SELL;MYC;BCL3;CCL3;PIM1;LCN2;CCL2;JUNB
Signal transduction through IL-1R	17/38	8.35178e-08	2.68848e-06	6.86365	111.865	MAP2K3;IL1RN;JUN;TGFB1;CHUK;IL1R1;IRAK3;IL1RAP;FOS;TNF;RELA;NFKB1;IL1A;IL6;IRAK2;IL1B;MAP3K7
RAGE pathway	22/60	8.61893e-08	2.70995e-06	4.91568	79.962	ITGB1;CXCL8;ANGPT2;TGFB1;SERPINE1;ICAM2;PDGFA;TNFRSF11B;TNF;SELE;RELA;ICAM1;VEGFA;GJA1;IL6;CASP3;IL1B;ID2;CCL2;ID3;ITGA5;LDLR
Thymic stromal lymphopoietin (TSLP) pathway	28/90	9.57034e-08	2.94071e-06	3.84033	62.0674	CD86;CD274;CD83;CXCL8;CSF1;CXCL1;TNFRSF11B;CXCL2;CXCL5;ICAM1;MYC;CCL3;CCL2;CCR7;TNFRSF4;TGFB1;TNFSF14;IL15;IL1R1;CCL20;NME1;IL6;PSMA1;IL1B;IRF1;IL3RA;BCL3;IDO1
Prolactin activation of MAPK signaling	25/75	1.02435e-07	3.07761e-06	4.24857	68.3766	ITGB1;GSK3B;SHC1;PIK3R1;RELA;SOCS2;SOCS3;SOCS1;CASP3;MYC;MAPK1;FYN;YWHAG;PTPN1;MAP2K1;JUN;STAT1;STAT3;PTPN11;FOS;NFKB1;IRF1;GRB2;SOS1;NFKBIB
FGF signaling pathway	22/61	1.21354e-07	3.56675e-06	4.78937	76.2686	JUN;SDC4;SHC1;STAT1;STAT3;PLAUR;FRS2;PTPN11;FOS;PIK3R1;FGF1;DUSP6;SSH1;PLAU;BGLAP;FGF18;MAPK1;NCAM1;GRB2;SOS1;MET;FGFR1
Signaling by TGF-beta receptor complex	23/66	1.30772e-07	3.76179e-06	4.54244	71.9967	TGIF1;PPP1R15A;WWTR1;CDKN2B;TGFB1;CCNT1;SMURF1;SERPINE1;UBE2D3;FURIN;RHOA;SMAD7;CDK9;FKBP1A;SKI;TFDP1;PARD6A;MYC;UBC;PMEPA1;STRAP;JUNB;TRIM33
Chemokine signaling pathway	45/189	1.44646e-07	4.0742e-06	2.66678	41.999	GSK3B;CXCL8;NCF1;SHC1;CCL4L2;CCL3L3;GNAI3;WAS;CXCR4;CXCL1;ADCY2;PIK3R1;FOXO3;CXCL2;CX3CL1;CXCL5;RELA;CDC42;GNG10;NRAS;CCL8;GNG2;CXCR1;GNG5;CXCR2;CCL3;CCL2;MAPK1;CCR7;LYN;MAP2K1;CHUK;CCL20;STAT1;STAT3;PPBP;NFKB1;RHOA;FGR;ELMO1;GRB2;SOS1;CRK;BCAR1;NFKBIB
Keratinocyte differentiation	21/57	1.53566e-07	4.23716e-06	4.95112	77.6788	MAP2K3;MAP2K1;JUN;CHUK;SHC1;FOS;TNFRSF1B;ETS1;TNF;ETS2;RELA;NFKB1;TNFRSF1A;PPP2CA;BCL2;MAPK1;PRKCQ;RIPK1;GRB2;SOS1;BIRC3
Neurotrophin signaling pathway	34/126	2.08512e-07	5.63816e-06	3.14635	48.4011	GSK3B;ZNF274;SHC1;YWHAB;PIK3R1;FOXO3;RELA;CDC42;RPS6KA3;NRAS;IRAK2;ABL1;MAPK1;YWHAG;SH2B2;YWHAH;NTRK2;MAP2K1;JUN;FRS2;IRAK3;PTPN11;NGF;NFKB1;RHOA;MAPK10;MAPKAPK2;BCL2;GRB2;CALM1;SOS1;CRK;ATF4;NFKBIB
Platelet activation, signaling and aggregation	47/205	2.56819e-07	6.80822e-06	2.53894	38.5282	SERPINA1;WDR1;SHC1;SERPINE1;GNAI3;ITPR1;PDGFA;PIK3R1;THBS1;CDC42;GNA13;GNA14;GNG10;GNA15;GNG2;GNG5;TBXA2R;GNA12;MAPK1;FYN;LYN;SRGN;PTPN1;TGFB1;TRPC6;VWF;VEGFC;PLA2G4A;ACTN4;PPBP;RHOA;ADRA2A;F5;RHOB;VEGFA;SELP;PRKCQ;GRB2;LCP2;CALM1;ALDOA;SOS1;CRK;VCL;BCAR1;RAPGEF4;DGKH
NOD signaling pathway	26/85	3.94877e-07	1.02668e-05	3.7444	55.21	CXCL8;TNFAIP3;CXCL1;PRDM1;CXCL2;TNF;RELA;CASP9;CCL8;IRAK2;CASP4;CCL2;MAPK1;NLRP3;MAP3K7;HSP90AA1;CHUK;CARD6;NFKB1;MAPK10;IL6;NLRP12;IL1B;NAIP;BIRC3;NFKBIB
Neurotrophic factor-mediated Trk receptor signaling	21/60	4.19771e-07	1.07081e-05	4.56949	67.0964	NTRK2;MAP2K1;SHC1;STAT3;FRS2;PTPN11;PIK3R1;NGF;RHOA;CDC42;NRAS;RIT1;EHD4;CCND1;ELMO1;ABL1;MAPK1;GRB2;SOS1;CRK;SQSTM1
Jak-STAT signaling pathway	45/199	6.90615e-07	1.7291e-05	2.4922	35.3536	CSF3;CSF2;CSF3R;CXCL8;IL5RA;PTPN21;CBLB;PIK3R1;SOCS2;SOCS3;CCND3;SPRED1;CCND2;SOCS1;CCND1;MYC;PIM1;IL6R;SOCS4;IFNAR2;PTPN1;IL4R;IL15;STAT1;STAT3;SPRY4;LIF;OSM;PTPN11;PTPN12;OSMR;PIAS2;PTPRE;IL6;PTPRB;PTP4A3;CLCF1;LEP;IL3RA;GRB2;SPRY1;IL6ST;SOS1;IFNAR1;BCL2L1
Interleukin-2/PI3K pathway	15/35	9.56019e-07	2.35007e-05	6.3533	88.0598	HSP90AA1;SGMS1;SHC1;PTPN11;PIK3R1;FOXO3;RELA;NFKB1;UGCG;MYC;SMPD1;BCL2;GRB2;SOS1;BCL2L1
Hypertrophy pathway	11/20	1.26841e-06	3.00857e-05	10.3403	140.398	IL1A;JUND;NR4A3;WDR1;IL1R1;IFRD1;ANKRD1;ATF3;DUSP14;VEGFA;HBEGF
Interleukin-3 regulation of hematopoietic cells	11/20	1.26841e-06	3.00857e-05	10.3403	140.398	CD86;CYSLTR1;CXCL8;TGFB1;IL1B;IL3RA;BCL2;IL5RA;FOS;CD69;TNF
Toll-like receptor signaling pathway regulation	35/142	1.44548e-06	3.36946e-05	2.78382	37.4342	CD86;CXCL8;TNFAIP3;PIK3R1;TNF;TREM1;RELA;SOCS1;IRAK2;NEU1;CCL3;MAPK1;MAP3K8;RIPK1;LBP;MAP3K7;IFNAR2;MAP2K3;MAP2K1;JUN;CHUK;STAT1;IRAK3;FOS;TICAM1;NFKB1;NFKB2;MAPK10;IL6;IL1B;IRF7;PELI1;TLR8;SQSTM1;IFNAR1
Insulin signaling pathway	56/277	1.56147e-06	3.57815e-05	2.16445	28.9384	GSK3B;CBLB;PIK3C2A;TNF;HK1;RPS6KA3;GRB14;KIF5B;FLOT1;MAP3K8;MAP3K7;MAP2K3;SLC2A14;MAP2K1;RHOH;FOS;RHOC;RHOA;RHOB;TNFRSF1A;INPP4A;RHOJ;PRKCQ;SGK1;SOS1;CRK;RHOQ;RRAD;SHC1;SRF;PIK3R1;FOXO3;SOCS2;SOCS3;NRAS;SOCS1;PARD6A;MKNK1;MAPK1;MAPK6;SOCS4;SH2B2;EGR1;PTPN1;JUN;XBP1;PTPN11;SORBS1;EHD1;MAPK10;MYO1C;PSMC4;RHEB;BCL2;GRB2;CALM1
Antiviral mechanism by interferon-stimulated genes	22/70	1.82898e-06	4.12129e-05	3.8894	51.3858	EIF4A1;POM121;SEH1L;NUP188;STAT1;MX2;EIF4A3;MX1;UBE2E1;NUP153;PPM1B;NUP50;NEDD4;UBC;KPNA4;NUP88;ARIH1;NUP98;KPNA2;KPNA3;EIF4G2;EIF4G1
Plasma membrane estrogen receptor signaling	16/41	1.89009e-06	4.18918e-05	5.42253	71.463	SHC1;NOS3;GNAI3;MSN;PIK3R1;RHOA;GNA13;GNA14;GNA15;NRAS;GNG2;GRB2;STRN;SOS1;BCAR1;HBEGF
Adipogenesis	33/133	2.44021e-06	5.24051e-05	2.80689	36.2747	CDKN1A;CEBPB;CEBPD;EPAS1;CELF1;SERPINE1;AHR;TNF;HIF1A;SOCS3;SOCS1;NAMPT;LMNA;WWTR1;TGFB1;GADD45B;GADD45A;STAT1;STAT3;HMGA1;LIF;OSM;CYP26A1;BMP2;IL6;KLF6;LEP;RARA;ID3;CTNNB1;PLIN2;IL6ST;PPARD
p53 signaling pathway	34/139	2.44195e-06	5.24051e-05	2.75478	35.5993	CCNK;DDX5;BTG2;CDKN1A;SERPINE1;PRDM1;NDRG1;CX3CL1;TP53BP2;BDKRB2;PMAIP1;E2F3;MCL1;PLK3;DUSP5;JUN;GPX1;NFYA;GADD45A;DUSP1;LIF;TAP1;TNFRSF10B;TNFRSF10A;TNFRSF10D;RGCC;TFDP1;BCL6;BCL2;MET;ATF3;HSPA1B;EPHA2;BCL2L1
HIF-1 transcriptional activity in hypoxia	21/66	2.49766e-06	5.2763e-05	3.9589	51.0704	EGLN1;JUN;PFKFB3;SERPINE1;CXCR4;ADM;FURIN;FOS;ETS1;HIF1A;NDRG1;HK1;VEGFA;LDHA;ID2;LEP;BHLHE40;HMOX1;PLIN2;ALDOA;MCL1
Alpha-9 beta-1 integrin pathway	12/25	2.74236e-06	5.55577e-05	7.81139	100.038	ITGB1;ADAM2;CSF2;ADAM12;TNC;KCNJ15;VEGFC;ADAM8;SAT1;BCAR1;TGM2;VEGFA
TWEAK signaling pathway	16/42	2.75323e-06	5.55577e-05	5.21368	66.7494	GSK3B;JUN;CHUK;TNFRSF12A;RELA;NFKB1;RELB;NFKB2;IL6;CASP3;CCL2;MAPK1;CTNNB1;RIPK1;MAP3K7;NFKBIB
Urokinase-type plasminogen activator (uPA) and uPAR-mediated signaling	16/42	2.75323e-06	5.55577e-05	5.21368	66.7494	ITGB1;TGFB1;ITGB5;SERPINE1;MMP3;FPR1;PLAUR;FPR2;VLDLR;PLAU;ITGAV;ITGA5;CRK;CTRC;BCAR1;GPLD1
Regulation of NFAT transcription factors	17/47	3.12286e-06	6.20898e-05	4.80214	60.8755	EGR1;PTPN1;BATF3;JUN;CSF2;CXCL8;EGR3;NFATC2;CBLB;NFATC1;FOS;PTGS2;TNF;FOSL1;CASP3;PRKCQ;JUNB
Signaling events mediated by focal adhesion kinase	20/62	3.39568e-06	6.61831e-05	4.03845	50.8562	ITGB1;MAP2K1;JUN;ITGB5;PTPN21;ACTN4;PIK3R1;ETS1;RHOA;CCND1;ELMO1;MAPK1;ITGAV;FYN;GRB2;ITGA5;SOS1;CRK;VCL;BCAR1
SHP2 signaling	19/57	3.42664e-06	6.61831e-05	4.23931	53.3471	NTRK2;MAP2K1;ANGPT1;SHC1;NOS3;STAT1;GNAI3;FRS2;PTPN11;PIK3R1;NGF;RHOA;VEGFA;NRAS;IL6;GRB2;IL6ST;SOS1;IL6R
EGF receptor transactivation by GPCRs in cardiac hypertrophy	14/34	3.92226e-06	7.42501e-05	5.92693	73.7835	JUN;MAP2K1;CHUK;SHC1;FOS;RELA;NFKB1;RHOA;EDNRB;MYC;ADAM12;MAPK1;GRB2;SOS1
Growth hormone receptor signaling	16/43	3.95415e-06	7.42501e-05	5.0203	62.4563	LYN;PTPN1;SLC2A14;MAP2K1;SHC1;STAT1;SRF;STAT3;PIK3R1;SOCS2;SOCS3;ADAM17;SOCS1;MAPK1;GRB2;SOS1
NGF signaling via TRKA from the plasma membrane	33/136	4.11568e-06	7.62246e-05	2.72468	33.788	GSK3B;CDKN1A;SHC1;YWHAB;MAPKAP1;ITPR1;ADCY2;PIK3R1;FOXO3;CASP9;PPP2CA;RPS6KA3;PPP2CB;NRAS;PPP2R1B;MAPK1;RALGDS;NTRK2;MAP2K1;DUSP3;CHUK;STAT3;FRS2;NGF;DUSP6;RHOA;NR4A1;RIT1;MAPKAPK2;GRB2;CALM1;SOS1;CRK
Epstein-Barr virus LMP1 signaling	11/22	4.35206e-06	7.95133e-05	8.45928	104.429	HSP90AA1;CXCL8;CHUK;CCL20;MAPK1;TNF;MAP3K7;NFKB1;RELA;PDLIM7;NFKB2
Fibroblast growth factor 1	12/26	4.60068e-06	8.29349e-05	7.25303	89.1347	CDKN1A;CEBPB;SERPINB2;CCND1;PLAU;BAMBI;ODC1;SERPINE1;PLAUR;PDGFA;TNPO1;VEGFA
RANKL regulation of apoptosis and immune response	22/74	5.11152e-06	9.09312e-05	3.58941	43.7334	CD86;EGR1;JUN;CSF3R;NFATC1;TXN;GABPB1;TNF;ICAM1;RELB;CDC42;BMP2;IL6;CCND2;BAG3;MGP;CCL3;BCL2;CCL2;CALM1;CD44;SNCA
MAPK cascade role in angiogenesis	20/64	5.8731e-06	0.000100968	3.85445	46.4273	ATF2;SEMA4A;MAP2K1;ANGPT1;SHC1;NOS3;WAS;FRS2;PTPN11;FGF1;SHB;VEGFA;CDC42;GRB14;MAPK1;GRB2;SOS1;MAP3K7;CRK;FGFR1
Apoptosis modulation and signaling	23/80	5.88558e-06	0.000100968	3.42406	41.236	JUN;TNFRSF6B;CRADD;IL1R1;IL1R2;TNFRSF10B;TNFRSF11B;TNFRSF10A;FOS;TNFRSF1B;NFKB1;TNFRSF1A;TNFRSF10D;CASP9;BAG3;CASP3;PTRH2;BCL2;PMAIP1;CYCS;BIRC3;MCL1;BCL2L1
Cytokines and inflammatory response	14/35	5.89976e-06	0.000100968	5.64438	67.9617	CSF3;CSF2;CXCL8;TGFB1;CSF1;IL15;PDGFA;CXCL1;CXCL2;TNF;IL1A;IL6;TXLNA;IL1B
Kit receptor signaling pathway	18/54	6.16905e-06	0.00010297	4.23777	50.8361	LYN;MAP2K1;SHC1;STAT1;STAT3;PTPN11;FOS;PIK3R1;FOXO3;RPS6KA3;SOCS1;BCL2;SNAI1;MAPK1;MAPT;SOS1;JUNB;CRK
RANKL signaling pathway	18/54	6.16905e-06	0.00010297	4.23777	50.8361	LYN;MAP2K1;JUN;CHUK;TNFRSF11B;NFATC1;FOS;PIK3R1;PAPSS2;RELA;NFKB1;ICAM1;RELB;NFKB2;CDC42;MAPK1;MAP3K7;SQSTM1
Alpha-V beta-3 integrin/OPN pathway	13/31	6.83106e-06	0.000112629	6.11288	72.7067	JUN;CHUK;PIK3R1;FOS;RELA;NFKB1;RHOA;CDC42;PLAU;MAPK1;ITGAV;BCAR1;CD44
MAP kinase signaling pathway	23/81	7.40116e-06	0.000120559	3.36484	39.7517	MAP2K3;ATF2;MAP2K1;JUN;TGFB1;CHUK;SHC1;STAT1;FOS;RELA;NFKB1;MAPK10;RPS6KA3;MYC;MKNK1;MAPKAPK2;MAPK1;MAP3K8;RIPK1;GRB2;MAPK6;MAP3K7;PAK2
Interleukin-11 pathway	11/23	7.54035e-06	0.000121364	7.75391	91.4592	SOCS3;JUN;MUC1;TGFB1;BGLAP;BCL2;FOS;MET;DUSP6;STX11;ICAM1
Chagas disease	27/104	7.94159e-06	0.000126133	2.97784	34.97	CXCL8;CCL3L3;SERPINE1;GNAI3;PIK3R1;TNF;RELA;PPP2CA;GNA14;PPP2CB;GNA15;PPP2R1B;BDKRB2;CCL3;CCL2;MAPK1;JUN;TGFB1;CHUK;FOS;TICAM1;NFKB1;TNFRSF1A;MAPK10;IL6;PPP2R2B;IL1B
Selenium pathway	19/60	8.04865e-06	0.000126133	3.92845	46.0808	SERPINA3;SERPINE1;HBB;TXN;PTGS2;SOD2;TNF;RELA;NFKB1;ICAM1;NFKB2;IL6;IL1B;ALOX5;ALOX5AP;SAA1;CCL2;SAA2;LDLR
Calcineurin-dependent NFAT signaling role in lymphocytes	18/55	8.26575e-06	0.000126133	4.123	48.2531	GSK3B;YWHAB;CSNK1A1;NFATC2;NFATC1;FKBP1A;NR4A1;RCAN1;CASP3;PIM1;BCL2;MAP3K8;PRKCQ;KPNA2;YWHAG;RAN;YWHAH;BCL2L1
Signaling by FGFR in disease	31/128	8.29324e-06	0.000126133	2.71619	31.7796	GSK3B;CDKN1A;SHC1;YWHAB;MAPKAP1;ITPR1;ADCY2;PIK3R1;FGF1;FOXO3;FGF5;CASP9;PPP2CA;PPP2CB;NRAS;MKNK1;UBC;MAPK1;MAP2K1;CHUK;STAT1;STAT3;FRS2;PTPN11;BCR;NR4A1;FGF18;GRB2;CALM1;SOS1;FGFR1
CXCR4 signaling pathway	29/116	8.30313e-06	0.000126133	2.8319	33.1301	ITGB1;MAPKAP1;GNAI3;CXCR4;PIK3R1;RELA;CDC42;GNA13;GNG2;RGS1;UBQLN1;MAPK1;ITGAV;FYN;LYN;MAP2K1;STAT1;ITGA1;STAT3;PTPN11;RHOC;NFKB1;RHOA;SSH1;RHOB;FGR;ITGA5;CRK;BCAR1
Antigen-activated B-cell receptor generation of second messengers	44/211	8.72547e-06	0.000131076	2.2444	26.1456	ATF2;GSK3B;SHC1;ITPR1;CBLB;BCL10;PIK3R1;ETS1;RELA;CDC42;NRAS;PPP3CC;MYC;SH3BP2;MAPK1;E2F3;FYN;MAPK6;MAP3K7;LYN;KLF11;JUN;MAP2K1;CHUK;NFATC2;NFATC1;PTPN11;FOS;LILRB3;ILF2;NFKB1;NFKB2;BCR;LAT2;MAPK10;STIM1;BCL6;REL;PRKCQ;GRB2;CALM1;SOS1;CRK;NFKBIB
Thyroid-stimulating hormone signaling pathway	20/66	9.88012e-06	0.00014679	3.68645	42.4863	MAP2K3;MAP2K1;JUN;STAT1;PDE4D;KCNIP3;STAT3;GNAI3;ADCY2;TTF2;FOS;PIK3R1;GNA13;CCND3;GNG2;MYC;GNA12;CDK2;MAPK1;RALGDS
Fc epsilon receptor I signaling in mast cells	15/41	1.00626e-05	0.000147876	4.88551	56.216	LYN;JUN;MAP2K1;SHC1;NFATC2;PLA2G4A;NFATC1;PIK3R1;FOS;PPP3CC;MAPK1;GRB2;CALM1;SOS1;PAK2
ERBB1 downstream pathway	27/106	1.16186e-05	0.000168906	2.90213	32.9766	ATF2;ARF4;YWHAB;MAPKAP1;SRF;PIK3R1;CDC42;PPP2CA;RPS6KA3;ZFP36;NRAS;MAPK1;RALGDS;YWHAG;YWHAH;EGR1;MAP2K1;JUN;DUSP1;STAT1;STAT3;FOS;DUSP6;GRB2;SOS1;RAB5A;BCL2L1
NF-kappaB signaling pathway	11/24	1.25848e-05	0.000181007	7.15705	80.7531	IL1A;CHUK;IL1R1;TNFAIP3;RIPK1;TNFRSF1B;TNF;MAP3K7;NFKB1;RELA;TNFRSF1A
Signaling by SCF-KIT	22/78	1.30603e-05	0.000185714	3.33227	37.4745	LYN;GSK3B;CDKN1A;MAP2K1;CHUK;YWHAB;STAT1;MAPKAP1;STAT3;PTPN11;PIK3R1;FOXO3;CASP9;NR4A1;NRAS;SOCS1;FES;MAPK1;FYN;GRB2;SOS1;SH2B2
Signaling by NGF	45/221	1.31868e-05	0.000185714	2.17797	24.4723	GSK3B;CDKN1A;SHC1;YWHAB;MAPKAP1;ITPR1;ADCY2;FURIN;PIK3R1;FOXO3;RELA;RTN4;PPP2CA;CASP9;RPS6KA3;AKAP13;FGD4;PPP2CB;NRAS;PPP2R1B;CASP3;UBC;MAPK1;RALGDS;NTRK2;MAP2K1;DUSP3;PLEKHG2;CHUK;STAT3;FRS2;NGF;DUSP6;RHOA;NFKB1;NR4A1;RIT1;ADAM17;MAPKAPK2;GRB2;ARHGEF1;CALM1;SOS1;SQSTM1;CRK
Adaptive immune system	98/606	1.39946e-05	0.000195059	1.65467	18.494	CD86;NCF1;UBE2D4;NCF4;UBE2D3;ICAM2;RNF19B;ICAM3;CBLB;ICAM4;PVR;ICAM1;UBE2L3;PPP2R1B;KIF5B;PSMD1;MAP3K8;MAP3K7;TRIM21;FBXW7;TAP2;UBE2E1;TAP1;STIM1;PSME3;PSME4;PRKCQ;CD274;PSMD12;PSMD14;SAR1B;SHC1;UBA6;MAPKAP1;ITPR1;BCL10;UBR1;PIK3R1;FOXO3;KLC1;ANAPC11;SOCS3;SOCS1;UBC;BTLA;LYN;UBE2H;SMURF1;KLHL21;LNPEP;UBE2A;NFKB1;NR4A1;SELL;REL;GRB2;UBA1;CALM1;CD200;NFKBIB;ITGB1;GSK3B;CDKN1A;ITGB5;YWHAB;CASP9;ACTR…
Chronic myeloid leukemia	21/73	1.46343e-05	0.000201893	3.42462	38.1234	CDKN1A;MAP2K1;TGFB1;CHUK;SHC1;CBLB;PTPN11;PIK3R1;RELA;NFKB1;BCR;NRAS;CCND1;MYC;ABL1;MAPK1;E2F3;GRB2;SOS1;CRK;BCL2L1
Developmental biology	73/420	1.53846e-05	0.0002101	1.79896	19.9363	ITGB1;GSK3B;NRP2;YWHAB;PITPNA;MED19;TNF;RND1;RPS6KA3;CCND3;MED13;ITGAV;NRCAM;MAP2K1;HSP90AA1;TRPC6;ITGA1;FOXH1;MED8;RGMB;RHOC;MED26;RHOA;RHOB;NR5A2;COL4A1;PRKCQ;ANGPTL4;ITGA5;SOS1;EZR;MYL9;MET;CEBPB;NOTCH1;CEBPD;FURIN;FOXO3;ACVR1B;RELA;CDC42;HELZ2;SPTA1;STIP1;SDCBP;NRAS;GPC1;ABL1;ST8SIA4;ABL2;BNIP2;MAPK1;FYN;HES1;NCAM1;PAK2;SPTBN1;CAP2;SPAG9;SEMA4A;TGFB1;SEMA4D;CNTN6;LIMK2;MSN;PTPN11;KLF4;NFKB1;F…
Folate metabolism	19/63	1.76648e-05	0.000238828	3.65999	40.0547	SERPINA3;CSF1;SERPINE1;HBB;SOD2;TNF;RELA;NFKB1;ICAM1;NFKB2;IL6;MTHFD2;IL1B;SAA1;CCL2;SAA2;FOLR3;GART;LDLR
Trefoil factor initiation of mucosal healing	14/38	1.80832e-05	0.000242064	4.938	53.9256	ITGB1;MAP2K1;CHUK;SHC1;PIK3R1;RELA;RHOA;CASP9;CASP3;MAPK1;CTNNB1;CYCS;GRB2;SOS1
HIV-1 Nef as negative effector of Fas and TNF	18/58	1.891e-05	0.000250651	3.81314	41.471	CDK11A;CHUK;CRADD;TNFRSF1B;TNF;CDK11B;RELA;NFKB1;LMNB1;TNFRSF1A;CASP9;CASP3;LMNA;BCL2;CYCS;RIPK1;PAK2;BIRC3
Interferon alpha/beta signaling	19/64	2.26435e-05	0.000297224	3.57845	38.2738	IFITM3;IFNAR2;EGR1;PTPN1;IFITM2;STAT1;MX2;MX1;PTPN11;IFIT3;OASL;ISG20;SOCS3;SOCS1;OAS2;IRF1;IRF7;IRF8;IFNAR1
Signaling events mediated by VEGFR1 and VEGFR2	20/70	2.59303e-05	0.000337094	3.39078	35.8069	MAP2K3;HSP90AA1;MAP2K1;NOS3;PTPN11;PIK3R1;SHB;RHOA;VEGFA;CDC42;FES;NEDD4;MAPKAPK2;MAPK1;CTNNB1;ITGAV;FYN;GRB2;PAK2;VCL
Ceramide signaling pathway	16/49	2.68795e-05	0.000343742	4.10614	43.2136	MAP2K1;ASAH1;CRADD;PDGFA;NGF;TNF;RELA;NFKB1;TNFRSF1A;MYC;SMPD1;BCL2;MAPK1;CYCS;RIPK1;BIRC3
Axon guidance	59/325	2.70465e-05	0.000343742	1.89254	19.9056	ITGB1;GSK3B;NRP2;YWHAB;PITPNA;RND1;RPS6KA3;PPP3CC;NRCAM;ITGAV;SEMA6B;EPHA4;MAP2K1;HSP90AA1;TRPC6;ITGA1;RGMB;RHOC;RHOA;RHOB;COL4A1;PRKCQ;ITGA5;EZR;SOS1;MYL9;MET;EPHA2;GNAI3;SEMA3G;CXCR4;SEMA3F;EFNB2;SPTA1;CDC42;SDCBP;STIP1;NRAS;GPC1;ST8SIA4;ABL1;ABL2;MAPK1;FYN;NCAM1;PAK2;SPTBN1;CAP2;SEMA4A;SEMA4D;CNTN6;LIMK2;NFATC2;MSN;NFATC1;PTPN11;FES;GRB2;FGFR1
Nuclear events mediated by MAP kinases	12/30	2.74586e-05	0.000343742	5.63998	59.2358	PPP2CA;MAPK10;ATF2;PPP2CB;RPS6KA3;JUN;DUSP3;PPP2R1B;MAPKAPK2;MAPK1;FOS;DUSP6
Tumor necrosis factor (TNF) pathway	12/30	2.74586e-05	0.000343742	5.63998	59.2358	MAPK10;JUN;CASP3;TNFAIP3;TNFRSF1B;TNF;MAP3K7;NFKB1;AGFG1;NFKB2;TNFRSF1A;BIRC3
Amoebiasis	26/105	2.85704e-05	0.000354378	2.79331	29.2268	SERPINB10;LAMA5;CSF2;RAB5C;CXCL8;CXCL1;PIK3R1;TNF;RELA;GNA14;GNA15;CASP3;ARG2;SERPINB1;TGFB1;SERPINB2;LAMB3;IL1R1;IL1R2;ACTN4;NFKB1;IL6;COL4A1;IL1B;RAB5A;VCL
Regular glucocorticoid receptor pathway	22/82	3.08365e-05	0.000375594	3.10942	32.297	GSK3B;EGR1;CDKN1A;HSP90AA1;JUN;CSF2;CXCL8;STAT1;NFATC1;FOS;SELE;RELA;NFKB1;ICAM1;MAPK10;NR4A1;IL6;BGLAP;IRF1;MAPK1;SGK1;YWHAH
SMAD2/3 nuclear pathway	22/82	3.08365e-05	0.000375594	3.10942	32.297	TGIF1;ATF2;HSPA8;CDKN1A;CEBPB;CDKN2B;JUN;ITGB5;SERPINE1;FOXH1;TFE3;FOS;FOXO3;SMAD7;SKI;TFDP1;MYC;CDK2;IRF7;SNIP1;DCP1A;ATF3
Ras signaling pathway	11/26	3.18446e-05	0.00038441	6.20208	64.2204	CASP9;CDC42;MAP2K1;CHUK;PIK3R1;SOS1;RALGDS;RELA;NFKB1;RHOA;BCL2L1
fMLP induced chemokine gene expression in HMC-1 cells	13/35	3.25236e-05	0.000389132	5.00032	51.6711	MAP2K3;MAP2K1;NCF1;FPR1;NCF1C;NFATC2;NFATC1;RELA;NFKB1;GNA15;PPP3CC;MAPK1;CALM1
Prolactin regulation of apoptosis	28/118	3.3191e-05	0.000393176	2.6414	27.2414	CEBPB;SOCS2;SOCS3;SPRED1;CCND1;HMOX1;PHLDA2;PHLDA1;LMCD1;GBP1;CA13;IER3;EGR1;CCT2;HSP90AA1;ANGPT1;SHISA2;PPRC1;DUSP6;KLF6;BCL6;IRF1;BCL3;MAFF;KLF9;BCL2;NABP1;TRIB1
Tie2 signaling	9/18	3.34432e-05	0.000393176	8.45222	87.1058	NRAS;ANGPT2;ANGPT1;GRB14;SHC1;PTPN11;GRB2;PIK3R1;SOS1
Prostate cancer	23/89	3.93743e-05	0.000458914	2.95565	29.9774	GSK3B;CDKN1A;HSP90AA1;MAP2K1;CHUK;PDGFA;PIK3R1;RELA;NFKB1;CASP9;NRAS;CCND1;CREB3L2;CDK2;BCL2;MAPK1;CTNNB1;E2F3;GRB2;SOS1;ATF4;CREB5;FGFR1
mTOR signaling pathway	27/113	3.99705e-05	0.000461881	2.66486	26.988	EIF4A1;RRN3;CAB39L;YWHAB;MAPKAP1;PIK3R1;HIF1A;PPP2CA;RPS6KA3;NRAS;MKNK1;MAPK1;YWHAG;YWHAH;MAP2K1;VEGFC;RHOA;VEGFA;FKBP1A;CLIP1;RRAGC;RHEB;CDK2;CYCS;SGK1;EIF4G2;EIF4G1
PI3K/PLC/TRK pathway	13/36	4.59816e-05	0.00051545	4.78265	47.7656	GSK3B;EGR1;SHC1;YWHAB;PIK3R1;FOXO3;NGF;NRAS;CCND1;GRB2;SOS1;YWHAG;YWHAH
Phospholipids as signaling intermediaries	13/36	4.59816e-05	0.00051545	4.78265	47.7656	ASAH1;MAP2K1;SHC1;SPHK1;PDGFA;PIK3R1;RHOA;SMPD1;S1PR1;MAPK1;ITGAV;GRB2;SOS1
Signaling to ERKs	13/36	4.59816e-05	0.00051545	4.78265	47.7656	MAP2K1;SHC1;YWHAB;FRS2;NGF;NRAS;RIT1;MAPKAPK2;MAPK1;GRB2;SOS1;RALGDS;CRK
Small cell lung cancer	22/84	4.61312e-05	0.00051545	3.00878	30.0397	ITGB1;LAMA5;CDKN2B;CHUK;LAMB3;PIK3R1;PTGS2;PIAS2;RELA;NFKB1;CASP9;CCND1;TRAF4;COL4A1;MYC;CDK2;BCL2;CYCS;ITGAV;E2F3;BIRC3;BCL2L1
Malaria	16/51	4.68786e-05	0.000519507	3.87107	38.5866	CSF3;CXCL8;TGFB1;SDC4;HBB;HBD;TNF;THBS1;SELE;ICAM1;SELP;IL6;IL1B;CCL2;ACKR1;MET
Transcriptional activity of SMAD2/SMAD3-SMAD4 heterotrimer	14/41	4.84928e-05	0.000533027	4.3886	43.5968	TGIF1;WWTR1;CDKN2B;CCNT1;SERPINE1;UBE2D3;SMAD7;CDK9;SKI;TFDP1;MYC;UBC;JUNB;TRIM33
Adhesion and diapedesis of granulocytes	8/15	5.14934e-05	0.000561444	9.6562	95.3458	SELP;IL1A;CSF3;CXCL8;SELL;ICAM2;TNF;ICAM1
Signaling events mediated by hepatocyte growth factor receptor (c-Met)	21/79	5.37545e-05	0.000581409	3.06932	30.1747	EGR1;PTPN1;MAP2K1;JUN;SHC1;PTPN11;PIK3R1;ETS1;RHOA;CDC42;PARD6A;SNAI1;MAPK1;CTNNB1;GRB2;SOS1;CRK;MET;PAK2;RAB5A;BCAR1
Signaling events mediated by PRL	10/23	5.52331e-05	0.00059266	6.50333	63.7583	ITGB1;EGR1;CDKN1A;PTP4A3;ITGA1;CDK2;MAPK1;RHOC;RHOA;BCAR1
Disease	104/674	5.61187e-05	0.000597421	1.56403	15.3088	CCNT1;NCF1;NUP188;GTF2B;NCF4;FGF1;RPL6;FGF5;MYC;KIF5B;PSMD1;MAP2K1;ATP6V1G2;SLC11A1;FRS2;BCR;ERN1;ADAM17;PSME3;CDC37;PSME4;ADAM12;ELMO1;NUP98;RPL29;ATF6;ATF3;ATF4;POM121;PSMD12;SEH1L;PSMD14;SHC1;MAPKAP1;ITPR1;PIK3R1;FOXO3;UBC;NUP88;ATP6V0A4;XBP1;TGFB1;HMGA1;NUP153;EIF2S1;CDK9;NR4A1;FGF18;GRB2;CALM1;FGFR1;GSK3B;CDKN1A;ACADVL;CXCL8;ELL;YWHAB;CASP9;RPL7A;CAMP;HSP90AA1;CHUK;NCBP2;VPS37C;PPP2R5B;VPS37…
Apoptosis modulation by HSP70	9/19	5.7554e-05	0.000607035	7.60658	74.2614	CASP9;MAPK10;CASP3;CYCS;RIPK1;NFKB1;HSPA1B;TNFRSF1A;HSPA1A
Interferon-gamma signaling pathway	24/97	5.79198e-05	0.000607035	2.78865	27.2073	PTPN1;MAP2K1;CEBPB;SP100;STAT1;PTAFR;STAT3;PTPN11;PIK3R1;ICAM1;SMAD7;OASL;SOCS3;SOCS1;OAS2;IL1B;IRF1;IRF7;IRF8;MAPK1;NCAM1;FCGR1A;GBP1;CD44
Interleukin-2 receptor beta chain in T cell activation	16/52	6.10932e-05	0.000625742	3.76333	36.516	MAP2K1;SHC1;FOS;PIK3R1;SOCS3;CCND3;CCND2;TFDP1;SOCS1;CCND1;MYC;BCL2;MAPK1;GRB2;SOS1;BCL2L1
Signaling events mediated by PTP1B	16/52	6.10932e-05	0.000625742	3.76333	36.516	LYN;PTPN1;CSF1;SHC1;STAT3;PIK3R1;TXN;RHOA;FGR;SOCS3;FCGR2A;LEP;FYN;GRB2;CRK;BCAR1
Vitamin B12 metabolism	16/52	6.10932e-05	0.000625742	3.76333	36.516	SERPINA3;SERPINE1;HBB;SOD2;TNF;RELA;NFKB1;ICAM1;NFKB2;IL6;TCN1;IL1B;SAA1;CCL2;SAA2;LDLR
Myometrial relaxation and contraction pathways	33/155	7.22667e-05	0.000734621	2.29789	21.9107	RGS18;ATF2;YWHAB;RGS16;ITPR1;ATP2A2;ADM;ADCY2;GABPB1;ETS2;RGS4;GJA1;RGS2;GNG2;GNG5;RGS1;PDE4B;YWHAG;YWHAH;JUN;NOS3;PDE4D;FOS;NFKB1;MYL4;IL6;IL1B;MAFF;PRKCQ;RGS11;CALM1;ATF3;ATF4
Signaling by EGFR in cancer	26/111	7.87741e-05	0.000794796	2.59526	24.5224	GSK3B;CDKN1A;SHC1;YWHAB;MAPKAP1;ITPR1;ADCY2;PIK3R1;FOXO3;CASP9;CDC42;NRAS;UBC;MAPK1;MAP2K1;HSP90AA1;CHUK;PTPN11;NR4A1;ADAM17;CDC37;ADAM12;GRB2;SPRY1;CALM1;SOS1
Endothelins	18/64	8.1324e-05	0.000814444	3.31465	31.2143	MAP2K1;JUN;TRPC6;GNAI3;PLA2G4A;ADCY2;FOS;RHOA;CDC42;GNA14;CYSLTR1;GNA15;EDNRB;GNA12;MAPK1;PRKCQ;CRK;BCAR1
Inhibition of cellular proliferation by Gleevec	10/24	8.56963e-05	0.000851922	6.03847	56.5485	BCR;JUN;MAP2K1;STAT1;MYC;BCL2;GRB2;FOS;PIK3R1;SOS1
Signaling of hepatocyte growth factor receptor	13/38	8.79302e-05	0.000866584	4.39955	41.0872	ITGB1;JUN;MAP2K1;ITGA1;STAT3;PTPN11;PIK3R1;FOS;MAPK1;GRB2;SOS1;CRK;MET
Renal cell carcinoma	19/70	8.84531e-05	0.000866584	3.1564	29.4588	EGLN1;MAP2K1;JUN;TGFB1;EPAS1;VEGFC;PTPN11;PIK3R1;ETS1;HIF1A;VEGFA;CDC42;NRAS;MAPK1;GRB2;SOS1;CRK;MET;PAK2
Hypoxia-inducible factor in the cardivascular system	8/16	9.33921e-05	0.00090839	8.4487	78.393	HSP90AA1;JUN;LDHA;ASPH;NOS3;UBE2A;HIF1A;VEGFA
Cell surface interactions at the vascular wall	23/94	9.84394e-05	0.000950643	2.74673	25.3416	ITGB1;LYN;ANGPT2;ANGPT1;SHC1;ATP1B3;PTPN11;PIK3R1;TREM1;SELP;THBD;SLC7A5;NRAS;GRB14;SELL;OLR1;ITGAV;FYN;ESAM;GRB2;ITGA5;SOS1;SLC16A3
Signaling by the B cell receptor (BCR)	32/151	0.000101184	0.000970214	2.28372	21.007	GSK3B;PSMD12;CDKN1A;PSMD14;SHC1;MAPKAP1;ITPR1;CBLB;BCL10;PIK3R1;FOXO3;RELA;CASP9;NRAS;UBC;PSMD1;FYN;MAP3K7;LYN;CHUK;NFKB1;NR4A1;STIM1;PSMA1;PSMC4;PSME3;PSME4;REL;GRB2;CALM1;SOS1;NFKBIB
Influence of Ras and Rho proteins on G1 to S transition	11/29	0.000105477	0.000990314	5.16753	47.3192	CDKN1A;MAP2K1;TFDP1;CCND1;CHUK;CDK2;MAPK1;PIK3R1;RELA;NFKB1;RHOA
S1P/S1P3 pathway	11/29	0.000105477	0.000990314	5.16753	47.3192	GNA13;GNA14;GNA15;GNA12;GNAI3;S1PR1;CXCR4;MAPK1;ITGAV;RHOA;VEGFA
T cell receptor calcium pathway	11/29	0.000105477	0.000990314	5.16753	47.3192	FKBP1A;FOSL1;RCAN1;BATF3;JUN;CSF2;NFATC2;NFATC1;FOS;PTGS2;JUNB
Focal adhesion	44/233	0.000107355	0.00100099	1.98068	18.1022	ITGB1;GSK3B;LAMA5;ITGB5;SHC1;TNC;PDGFA;PIK3R1;THBS1;CDC42;CCND3;CCND2;CCND1;MAPK1;ITGAV;FYN;MAPK6;PELO;PAK2;MAP2K3;JUN;MAP2K1;VWF;LAMB3;ITGA1;VEGFC;ACTN4;RHOA;RHOB;VEGFA;FGR;MAPK10;COL4A1;BCL2;CTNNB1;GRB2;ITGA5;SOS1;MYL9;CRK;MET;VCL;BCAR1;BIRC3
FoxO family signaling	15/49	0.000109982	0.00101846	3.7343	34.0389	CHUK;YWHAB;CSNK1A1;GADD45A;CSNK1D;FOXO3;SOD2;MAPK10;BCL6;CDK2;CTNNB1;SGK1;YWHAG;RAN;YWHAH
T cell receptor signaling pathway	30/139	0.000116343	0.00107004	2.33649	21.1662	GSK3B;CSF2;SHC1;CBLB;BCL10;PIK3R1;TNF;RELA;CDC42;NRAS;PPP3CC;MAPK1;MAP3K8;FYN;MAP3K7;PAK2;MAP2K1;JUN;CHUK;NFATC2;NFATC1;FOS;NFKB1;RHOA;PRKCQ;GRB2;LCP2;CALM1;SOS1;NFKBIB
FRS2-mediated cascade	13/39	0.000119162	0.00108126	4.23009	38.219	MAP2K1;SHC1;YWHAB;FRS2;PTPN11;FGF1;FGF5;NRAS;FGF18;MAPK1;GRB2;SOS1;FGFR1
Signaling events regulated by Ret tyrosine kinase	13/39	0.000119162	0.00108126	4.23009	38.219	JUN;SHC1;FRS2;PTPN11;PIK3R1;RHOA;DOK5;MAPK1;GRB2;SOS1;CRK;PDLIM7;BCAR1
Retinoblastoma protein regulation	18/66	0.00012577	0.00113361	3.17619	28.5255	ATF2;BRD2;CDKN1A;CEBPB;JUN;CSF2;CEBPD;PPP2CA;CCND3;ELF1;CCND2;TFDP1;CCND1;BGLAP;CDK2;ABL1;E2F3;MET
Leishmaniasis	19/72	0.000133369	0.00119414	3.03695	27.0968	ITGB1;JUN;MARCKSL1;TGFB1;NCF1;STAT1;NCF4;FOS;PTGS2;TNF;RELA;NFKB1;IL1A;FCGR2A;IL1B;MAPK1;FCGR1A;MAP3K7;NFKBIB
Signaling by ERBB2	24/102	0.00013545	0.00120479	2.60915	23.2395	GSK3B;MAP2K1;CDKN1A;HSP90AA1;CHUK;SHC1;YWHAB;MAPKAP1;ITPR1;ADCY2;PIK3R1;FOXO3;EREG;CASP9;NR4A1;NRAS;CDC37;UBC;MAPK1;GRB2;FYN;CALM1;SOS1;HBEGF
Fas signaling pathway	26/115	0.000146635	0.00125724	2.47806	21.8752	TNFRSF6B;CXCL8;ADRB2;PIK3R1;CASP3;SMPD1;MAPK1;RIPK1;MAPK6;MAP3K7;PAK2;DEDD;AGFG1;CHUK;CSNK1A1;NFATC2;CSNK1D;NFATC1;NFKB1;HIPK3;NFKB2;MAPK10;IL1A;CYCS;EZR;BIRC3
Cytosolic sensors of pathogen-associated DNA	9/21	0.000150294	0.00125724	6.3381	55.7938	CHUK;SAA1;S100A12;RIPK1;TICAM1;NFKB1;RELA;NFKB2;NFKBIB
IGF1 signaling pathway	9/21	0.000150294	0.00125724	6.3381	55.7938	JUN;MAP2K1;SHC1;SRF;PTPN11;GRB2;FOS;PIK3R1;SOS1
Oxidative stress-induced gene expression via Nrf2	9/21	0.000150294	0.00125724	6.3381	55.7938	JUN;POR;MAFG;MAFF;HMOX1;MAPK1;MAFK;FOS;NFE2L2
S1P/S1P1 pathway	9/21	0.000150294	0.00125724	6.3381	55.7938	ABCC1;SPHK1;GNAI3;S1PR1;MAPK1;ITGAV;PTGS2;RHOA;VEGFA
Apoptosis intrinsic pathway	11/30	0.000150646	0.00125724	4.89529	43.0813	CASP9;PPP3CC;TFDP1;YWHAB;CASP3;BCL2;PMAIP1;CYCS;DYNLL1;DYNLL2;BCL2L1
Interleukin-2/STAT5 pathway	11/30	0.000150646	0.00125724	4.89529	43.0813	CCND3;ELF1;CCND2;SHC1;MYC;BCL2;PTPN11;GRB2;PIK3R1;SOS1;BCL2L1
PDGFA signaling pathway	11/30	0.000150646	0.00125724	4.89529	43.0813	JUN;MAP2K1;SHC1;STAT1;SRF;STAT3;PDGFA;GRB2;PIK3R1;FOS;SOS1
TNFR1 signaling pathway	11/30	0.000150646	0.00125724	4.89529	43.0813	JUN;CRADD;CASP3;LMNA;RIPK1;TNF;MAP3K7;PAK2;LMNB1;TNFRSF1A;BIRC3
p38-alpha and p38-beta regulation	11/30	0.000150646	0.00125724	4.89529	43.0813	CDC42;LYN;MAP2K3;FGR;DUSP10;DUSP1;FYN;RIPK1;CCM2;DUSP16;PAK2
Cadmium-induced DNA biosynthesis and proliferation in macrophages	8/17	0.000159996	0.00132708	7.50954	65.6361	JUN;MAP2K1;MYC;MAPK1;FOS;TNF;NFKB1;RELA
Thromboxane A2 receptor signaling	16/56	0.000162789	0.00134202	3.38624	29.5383	LYN;NOS3;SELE;RHOA;ICAM1;FGR;GNA13;GNA14;GNA15;GNG2;TBXA2R;GNA12;ARHGEF1;PRKCQ;FYN;TGM2
C-Myb transcription factor network	21/85	0.000167959	0.00136796	2.78063	24.1687	HSPA8;CDKN1A;SLC25A3;CEBPB;ZFHX3;CEBPD;PTGS2;ETS1;ETS2;HIPK2;SKI;CA1;NRAS;CCND1;MAT2A;MYC;PIM1;BCL2;HES1;MAP3K7;BIRC3
Integrin cell surface interactions	21/85	0.000167959	0.00136796	2.78063	24.1687	ITGB1;LAMA5;PTPN1;ITGB5;VWF;SHC1;ITGA1;ICAM2;TNC;ICAM3;ICAM4;THBS1;ICAM1;COL4A1;ITGAV;GRB2;ITGA5;SOS1;CRK;BCAR1;RAPGEF4
Colorectal cancer	17/62	0.0001789	0.00143972	3.19873	27.6009	GSK3B;MAP2K1;JUN;TGFB1;FOS;PIK3R1;RHOA;CASP9;MAPK10;CCND1;CASP3;MYC;BCL2;MAPK1;CTNNB1;CYCS;RALGDS
Shigellosis	17/62	0.0001789	0.00143972	3.19873	27.6009	ITGB1;CXCL8;CHUK;ARPC5L;WAS;RELA;NFKB1;CDC42;MAPK10;ELMO1;ABL1;MAPK1;ITGA5;CRK;CD44;VCL;NFKBIB
Interleukin-4 signaling pathway	24/104	0.000186286	0.00149029	2.54364	21.8454	ATF2;CEBPB;IL4R;CHUK;SHC1;STAT1;STAT3;HMGA1;PTPN11;PIK3R1;FOS;ETS1;NFKB1;RELA;SELP;SOCS3;SOCS1;BCL6;NFIL3;FES;MAPK1;GRB2;SOS1;BCL2L1
ERBB2 role in signal transduction and oncology	10/26	0.000190181	0.00150419	5.28307	45.2629	MAP2K1;IL6;SHC1;STAT3;MAPK1;GRB2;PIK3R1;IL6ST;SOS1;IL6R
Epithelial cell signaling in Helicobacter pylori infection	18/68	0.000190249	0.00150419	3.0488	26.1196	LYN;JUN;CXCL8;ATP6V1G2;CHUK;CXCL1;PTPN11;RELA;NFKB1;CDC42;MAPK10;ADAM17;CXCR1;CASP3;CXCR2;ATP6V0A4;MET;HBEGF
Wnt signaling pathway and pluripotency	23/98	0.000192729	0.00151494	2.59966	22.2381	GSK3B;JUN;WNT2B;FZD5;NFYA;RHOA;FOSL1;PPP2CA;MAPK10;PPP2CB;CCND3;CCND2;CCND1;PPP2R1B;PLAU;PPP2R2B;MYC;CTNNB1;PRKCQ;MAP3K7;LDLR;CD44;PPARD
Prostaglandin biosynthesis and regulation	11/31	0.000211234	0.0016508	4.65026	39.353	PTGER4;HSD11B1;EDNRB;ANXA1;ANXA2;ANXA3;PTGER2;ANXA5;PLA2G4A;PTGS2;S100A10
p75 neurotrophin receptor-mediated signaling	27/124	0.000214078	0.00166341	2.3612	19.9502	ZNF274;BEX1;SHC1;FURIN;PIK3R1;RTN4;RELA;CASP9;AKAP13;FGD4;CASP3;UBC;PLEKHG2;CHUK;MMP3;NGF;RHOC;NFKB1;RHOA;RHOB;MAPK10;ADAM17;CYCS;ARHGEF1;SOS1;SQSTM1;BIRC3
p53 activity regulation	26/118	0.000227625	0.00175856	2.39685	20.1043	GSK3B;CDKN1A;SERPINE1;PPM1D;THBS1;CASP9;PPP2CA;CCND3;RASSF1;CCND2;CCND1;CASP3;SESN2;ABL1;SMYD2;PMAIP1;GADD45B;GADD45A;CSNK1A1;TNFRSF10B;CSNK1D;FBXO11;HIPK2;CDK2;BCL2;CYCS
Signaling events mediated by stem cell factor receptor (c-Kit)	15/52	0.000230171	0.00176036	3.43095	28.74	LYN;GSK3B;MAP2K1;SHC1;STAT1;STAT3;PTPN11;PIK3R1;FOXO3;SPRED1;SOCS1;BCL2;GRB2;SOS1;SH2B2
AKT signaling pathway	9/22	0.000230461	0.00176036	5.85023	48.9982	CASP9;PPP2CA;HSP90AA1;CHUK;PIK3R1;FOXO3;NFKB1;RELA;YWHAH
Interleukin-1 processing	5/7	0.000234325	0.00177982	21.0989	176.362	IL1A;IL1B;NFKB1;RELA;NFKB2
Bone remodeling	8/18	0.000261238	0.00196112	6.7582	55.7557	IFNAR2;FOSL1;CHUK;FOS;NFKB1;RELA;FOSL2;IFNAR1
Corticosteroids and cardioprotection	8/18	0.000261238	0.00196112	6.7582	55.7557	HSP90AA1;ANXA1;NOS3;ADRB2;PIK3R1;CALM1;NFKB1;RELA
S1P/S1P4 pathway	7/14	0.000262546	0.00196112	8.44518	69.6312	CDC42;GNA13;GNA12;GNAI3;MAPK1;S1PR4;RHOA
Oxidative stress	10/27	0.000273467	0.00202037	4.97202	40.7921	MAPK10;NQO1;MGST1;HMOX1;MT1X;FOS;SOD2;JUNB;NFKB1;NFE2L2
TWEAK regulation of gene expression	10/27	0.000273467	0.00202037	4.97202	40.7921	IL6;CXCL8;TNFRSF12A;BGLAP;SERPINE1;CCL3;CCL2;TNF;ICAM1;BCL2L1
Signaling events mediated by T cell protein tyrosine phosphatase (TC-PTP)	13/42	0.000276217	0.00202959	3.79186	31.0717	ITGB1;PTPN1;CSF1;SHC1;STAT1;ITGA1;STAT3;PIK3R1;VEGFA;GRB2;KPNA2;SOS1;MET
Pancreatic cancer	18/70	0.000281915	0.00206026	2.93121	23.9594	MAP2K1;TGFB1;CHUK;STAT1;STAT3;VEGFC;PIK3R1;RELA;NFKB1;VEGFA;CASP9;CDC42;MAPK10;CCND1;MAPK1;E2F3;RALGDS;BCL2L1
Thrombin signaling through protease-activated receptors	15/53	0.00028986	0.00209672	3.34047	27.2118	ARFGEF2;PIK3R1;RHOA;GNA13;CYTH2;GNA14;GNA15;GNG10;GNG2;GNG5;GNA12;MAPK1;ARHGEF1;MAP3K7;CYTH1
Interleukin-23-mediated signaling events	12/37	0.000290004	0.00209672	4.05919	33.0646	SOCS3;IL6;IL18RAP;STAT1;IL1B;STAT3;CCL2;CXCL1;PIK3R1;TNF;RELA;NFKB1
Caspase cascade in apoptosis	16/59	0.000315282	0.00226734	3.14946	25.3911	CRADD;TNFRSF10B;TNFRSF10A;TNF;LMNB1;TNFRSF1A;CASP9;CASP3;CASP4;LMNA;BCL2;CYCS;RIPK1;TOP1;BIRC3;BCL2L1
Diurnally regulated genes with circadian orthologs	14/48	0.000325211	0.00230202	3.4837	27.9777	IDI1;HSPA8;CEBPB;BTG1;TOB1;AZIN1;DNAJA1;PER2;PPP2CB;VAPA;TUBB3;KLF9;CRY1;EIF4G2
Post-translational regulation of adherens junction stability and disassembly	14/48	0.000325211	0.00230202	3.4837	27.9777	NTRK2;PTPN1;MMP3;NME1;CDC42;GNA13;CASP3;GNA12;ABL1;CTNNB1;FYN;CBLL1;MET;RAB5A
Presenilin action in Notch and Wnt signaling	14/48	0.000325211	0.00230202	3.4837	27.9777	GSK3B;JUN;NOTCH1;TLE1;CSNK1A1;FOS;ADAM17;CCND1;MYC;NEDD4;MAPK1;CTNNB1;MAP3K7;PPARD
Interleukin-12-mediated signaling events	17/65	0.000331874	0.00233695	2.99831	24.0187	MAP2K3;ATF2;GADD45B;IL1R1;STAT1;CCL4L2;STAT3;FOS;RELA;NFKB1;RELB;NFKB2;IL18RAP;SOCS1;HLX;IL1B;CCL3
Hypoxia and p53 in the cardiovascular system	9/23	0.000343109	0.00240354	5.43205	43.334	NQO1;DNAJB1;CDKN1A;HSP90AA1;GADD45A;UBE2A;HIF1A;HSPA1A;NFKBIB
Cyclin D-associated events in G1	12/38	0.00038327	0.00267103	3.90285	30.7029	PPP2CA;CDKN2D;PPP2CB;CDKN1A;CCND3;CDKN2B;CCND2;TFDP1;CCND1;PPP2R1B;UBC;E2F3
Signaling by PDGF	26/122	0.000396026	0.00274578	2.29647	17.9906	GSK3B;CDKN1A;YWHAB;MAPKAP1;ITPR1;PDGFA;ADCY2;FURIN;PIK3R1;FOXO3;THBS1;CASP9;NRAS;MAPK1;MAP2K1;CHUK;STAT1;STAT3;PTPN11;NR4A1;COL4A1;GRB2;CALM1;SOS1;CRK;BCAR1
Semaphorin interactions	17/66	0.00040338	0.00276736	2.93695	22.9541	ITGB1;GSK3B;SEMA4A;HSP90AA1;SEMA4D;LIMK2;ITGA1;RHOC;RHOA;RND1;RHOB;CDC42;FES;FYN;MET;MYL9;PAK2
Monocyte and its surface molecules	6/11	0.000408982	0.00276736	10.1306	79.037	ITGB1;SELP;SELL;SELE;CD44;ICAM1
Osteopontin signaling	6/11	0.000408982	0.00276736	10.1306	79.037	MAP2K1;CHUK;PLAU;MAPK1;NFKB1;RELA
PTEN-dependent cell cycle arrest and apoptosis	8/19	0.000409373	0.00276736	6.14348	47.9245	ITGB1;SHC1;MAPK1;GRB2;PIK3R1;FOXO3;SOS1;BCAR1
Signaling by constitutively active EGFR	8/19	0.000409373	0.00276736	6.14348	47.9245	HSP90AA1;NRAS;SHC1;CDC37;UBC;GRB2;PIK3R1;SOS1
Stress induction of HSP regulation	7/15	0.000447218	0.00300815	7.38912	56.9883	CASP9;IL1A;CASP3;MAPKAPK2;BCL2;CYCS;TNF
ERBB2/ERBB3 signaling events	13/44	0.000459011	0.00305706	3.54683	27.2625	JUN;MAP2K1;SHC1;STAT3;PTPN11;PIK3R1;FOS;CDC42;MAPK10;NRAS;MAPK1;GRB2;SOS1
Heart development	13/44	0.000459011	0.00305706	3.54683	27.2625	FOXC1;NOTCH1;SRF;FOXH1;NFATC2;VEGFC;NFATC1;PTPN11;VEGFA;BMP2;BHLHE40;MAPK1;CTNNB1
Myc active pathway	20/85	0.000474148	0.00314239	2.60609	19.947	EIF4A1;HSP90AA1;HSPA4;ODC1;HMGA1;EIF2S1;NME1;HSPD1;FOSL1;LDHA;MYCT1;CCND2;MYC;ID2;POLR3D;PIM1;SNAI1;PMAIP1;E2F3;EIF4G1
T cell receptor signaling in naive CD4+ T cells	17/67	0.000487796	0.00321707	2.87805	21.9469	CD86;CHUK;SHC1;WAS;PTPN11;BCL10;CDC42;NRAS;STIM1;RASSF5;SH3BP2;MAP3K8;LCP2;PRKCQ;FYN;GRB2;SOS1
Gastrin-CREB signaling pathway via PKC and MAPK	38/206	0.000493392	0.00323819	1.92115	14.6281	RGS18;YWHAB;PTAFR;ITPR1;LPAR2;FPR2;PIK3R1;RPS6KA3;GNA14;GNG10;GPR132;NRAS;CYSLTR1;RGS2;GNA15;EDNRB;GNG2;GNG5;TBXA2R;P2RY2;BDKRB2;PROK2;BDKRB1;MAPK1;FFAR2;TAC1;MAP2K1;ANXA1;TRPC6;MMP3;GPR4;GNRH2;SAA1;PRKCQ;GRB2;SOS1;HBEGF;DGKH
TAK1 activates NF-kappaB by phosphorylation and activation of IKK complex	9/24	0.000497557	0.00324974	5.06963	38.5586	CHUK;IRAK2;SAA1;S100A12;MAP3K7;NFKB1;RELA;NFKB2;NFKBIB
FAS pathway and stress induction of heat shock protein regulation	12/39	0.000500651	0.00325423	3.75809	28.56	CASP9;IL1A;JUN;CASP3;LMNA;MAPKAPK2;BCL2;CYCS;TNF;MAP3K7;PAK2;LMNB1
Downstream signaling events Of B cell receptor (BCR)	22/98	0.000509792	0.00329779	2.4526	18.5944	GSK3B;PSMD12;CDKN1A;PSMD14;CHUK;MAPKAP1;BCL10;FOXO3;NFKB1;RELA;CASP9;NR4A1;NRAS;PSMA1;PSMC4;PSME3;PSME4;UBC;REL;PSMD1;MAP3K7;NFKBIB
Induction of apoptosis through DR3 and DR4/5 death receptors	11/34	0.000528718	0.00340393	4.04303	30.5049	CASP9;CHUK;CASP3;LMNA;BCL2;TNFRSF10B;RIPK1;TNFRSF10A;RELA;NFKB1;BIRC3
Support of platelet aggregation by Eph kinases and ephrins	5/8	0.000570016	0.0036352	14.0652	105.065	ITGB1;LYN;SELP;EPHA4;FYN
TSP1-induced apoptosis in microvascular endothelial cell	5/8	0.000570016	0.0036352	14.0652	105.065	JUN;CASP3;FYN;FOS;THBS1
RhoA signaling pathway	13/45	0.000583456	0.00370344	3.4358	25.5848	ITGB1;MAP2K3;ATF2;JUN;SRF;LIMK2;MSN;FOS;RHOA;CDC42;PARD6A;EZR;VCL
ID regulation of gene expression	8/20	0.000619094	0.00387507	5.63121	41.5991	CDKN1A;CXCL8;CCND1;CXCL1;SEMA3F;SELE;THBS1;ICAM1
Nerve growth factor (NGF) pathway	8/20	0.000619094	0.00387507	5.63121	41.5991	JUN;MAP2K1;SHC1;GRB2;FOS;PIK3R1;NGF;SOS1
Sprouty regulation of tyrosine kinase signals	8/20	0.000619094	0.00387507	5.63121	41.5991	MAP2K1;PTPRB;SHC1;SPRY4;MAPK1;GRB2;SPRY1;SOS1
Signaling by ERBB4	21/93	0.000623174	0.00388263	2.47056	18.2345	GSK3B;CDKN1A;MAP2K1;CHUK;YWHAB;SHC1;MAPKAP1;PTPN11;PIK3R1;FOXO3;EREG;CASP9;NR4A1;ADAM17;NRAS;NEDD4;UBC;MAPK1;GRB2;SOS1;HBEGF
Negative regulation of FGFR signaling	12/40	0.000646856	0.0040117	3.62367	26.61	FGF5;PPP2CA;PPP2CB;MKNK1;UBC;FGF18;MAPK1;FRS2;PTPN11;GRB2;FGF1;FGFR1
Acute myeloid leukemia	15/57	0.000680349	0.00418105	3.02165	22.0366	MAP2K1;CHUK;STAT3;PIK3R1;RELA;NFKB1;NRAS;CCND1;MYC;PIM1;RARA;MAPK1;GRB2;SOS1;PPARD
PI3K cascade	15/57	0.000680349	0.00418105	3.02165	22.0366	GSK3B;CDKN1A;CHUK;MAPKAP1;FRS2;PTPN11;PIK3R1;FGF1;FOXO3;CASP9;FGF5;NR4A1;FGF18;GRB2;FGFR1
EGF receptor (ErbB1) signaling pathway	11/35	0.000697803	0.00419723	3.87435	28.1571	PTPN1;NRAS;SHC1;STAT1;STAT3;GNAI3;MAPK1;PTPN11;GRB2;PIK3R1;SOS1
Interleukin-7 signaling pathway	11/35	0.000697803	0.00419723	3.87435	28.1571	GSK3B;MAP2K1;CCND1;STAT1;MYC;STAT3;BCL2;MAPK1;FYN;PIK3R1;BCL2L1
PIK3C1/AKT pathway	11/35	0.000697803	0.00419723	3.87435	28.1571	CASP9;GSK3B;CDKN1A;HSP90AA1;CHUK;YWHAB;MAPKAP1;FOXO3;YWHAG;YWHAH;BCL2L1
Prion diseases	11/35	0.000697803	0.00419723	3.87435	28.1571	STIP1;EGR1;IL1A;MAP2K1;IL6;NOTCH1;IL1B;MAPK1;FYN;NCAM1;HSPA1A
NFAT involvement in hypertrophy of the heart	17/69	0.000702974	0.00419723	2.76705	20.0893	GSK3B;MAP2K1;SHC1;CSNK1A1;LIF;ATP2A2;NFATC2;NFATC1;PIK3R1;TNF;PPP3CC;MAPK1;GRB2;SOS1;CALM1;YWHAH;HBEGF
SHC1 events in ERBB2 signaling	9/25	0.000704712	0.00419723	4.75251	34.4924	NRAS;MAP2K1;SHC1;YWHAB;MAPK1;GRB2;SOS1;EREG;HBEGF
TPO signaling pathway	9/25	0.000704712	0.00419723	4.75251	34.4924	JUN;MAP2K1;SHC1;STAT1;STAT3;GRB2;PIK3R1;FOS;SOS1
Acetylation and deacetylation of RelA in the nucleus	7/16	0.000722417	0.00423458	6.56774	47.5038	CHUK;RIPK1;TNFRSF1B;TNF;NFKB1;RELA;TNFRSF1A
Interleukin-9 signaling pathway	7/16	0.000722417	0.00423458	6.56774	47.5038	CDK9;MAP2K1;STAT1;STAT3;MAPK1;GRB2;PIK3R1
Sprouty regulation of FGF signaling	7/16	0.000722417	0.00423458	6.56774	47.5038	PPP2CA;PPP2CB;MKNK1;UBC;MAPK1;PTPN11;GRB2
ERBB signaling pathway	21/94	0.000723513	0.00423458	2.43658	17.6199	GSK3B;CDKN1A;HSP90AA1;MAP2K1;JUN;SHC1;CBLB;PIK3R1;EREG;MAPK10;NRAS;CCND1;MYC;ABL1;ABL2;MAPK1;GRB2;SOS1;CRK;PAK2;HBEGF
ERK inactivation	6/12	0.000744518	0.00432012	8.44166	60.8034	PPP2CA;PPP2CB;DUSP3;PPP2R1B;MAPK1;DUSP6
SODD/TNFR1 signaling pathway	6/12	0.000744518	0.00432012	8.44166	60.8034	CRADD;RIPK1;TNFRSF1B;TNF;BIRC3;TNFRSF1A
Hematopoietic cell lineage	20/88	0.000761425	0.00439934	2.4907	17.884	CSF3;CSF2;CSF3R;IL4R;CSF1;IL1R1;IL1R2;ITGA1;IL5RA;TNF;IL1A;IL6;IL1B;IL3RA;CD59;ITGA5;FCGR1A;IL6R;CD44;CD55
EGF/EGFR signaling pathway	28/141	0.00080045	0.00460514	2.10105	14.9812	ERRFI1;SHC1;PIK3R1;ELK4;CDC42;RPS6KA3;GJA1;ABL1;REPS2;MAPK1;RALGDS;MAP2K1;JUN;JUND;STAT1;LIMK2;STAT3;PTPN11;FOS;PTPN12;PLSCR1;FOSB;GRB2;ARHGEF1;SOS1;RAB5A;CRK;BCAR1
Actin cytoskeleton regulation	40/226	0.000835009	0.00478361	1.82646	12.9461	ITGB1;ITGB5;ARPC5L;WAS;PDGFA;PIK3R1;FGF1;PIK3C2A;FGF5;CDC42;GNA13;NRAS;SCIN;GNA12;BDKRB2;BDKRB1;MAPK1;ITGAV;MAPK6;PAK2;MAP2K1;LIMK2;ITGA1;RRAS2;MSN;ACTN4;RHOA;SSH1;MRAS;FGF18;ARHGEF1;ITGA5;EZR;FGF13;SOS1;MYL9;CRK;VCL;BCAR1;FGFR1
NF-kappaB activation by non-typeable Hemophilus influenzae	10/31	0.000967094	0.00551692	4.02407	27.9319	MAP2K3;CXCL8;TGFB1;CHUK;DUSP1;IL1B;TNF;MAP3K7;RELA;NFKB1
Inhibition of activated T cell apoptosis by neuropeptides VIP and PACAP	9/26	0.000977112	0.00552743	4.4727	30.9999	PPP3CC;EGR3;CHUK;MYC;NFATC2;NFATC1;CALM1;RELA;NFKB1
Physiological and pathological hypertrophy of the heart	9/26	0.000977112	0.00552743	4.4727	30.9999	MAP2K3;JUN;MYEF2;STAT3;MAPK1;FOS;CALM1;IL6ST;RHOA
Bladder cancer	12/42	0.00104758	0.00587689	3.38171	23.2029	CDKN1A;NRAS;RASSF1;MAP2K1;CXCL8;CCND1;MYC;MAPK1;VEGFC;E2F3;THBS1;VEGFA
VEGF, hypoxia, and angiogenesis	12/42	0.00104758	0.00587689	3.38171	23.2029	HSP90AA1;SHC1;NOS3;BDKRB2;GRB2;PIK3R1;SOS1;HIF1A;EIF2S1;BCAR1;EIF1;VEGFA
Activation of BH3-only proteins	7/17	0.00111611	0.00610926	5.91063	40.1799	PPP3CC;TFDP1;YWHAB;BCL2;PMAIP1;DYNLL1;DYNLL2
Beta-catenin phosphorylation cascade	7/17	0.00111611	0.00610926	5.91063	40.1799	PPP2CA;GSK3B;PPP2CB;PPP2R1B;CSNK1A1;PPP2R5B;CTNNB1
Cells and molecules involved in local acute inflammatory response	7/17	0.00111611	0.00610926	5.91063	40.1799	ITGB1;SELP;IL1A;IL6;CXCL8;TNF;ICAM1
Platelet sensitization by LDL	7/17	0.00111611	0.00610926	5.91063	40.1799	FGR;PPP2CA;PPP2CB;PPP2R1B;PPP2R5B;PLA2G4A;PTPN11
SHC-related events	7/17	0.00111611	0.00610926	5.91063	40.1799	MAP2K1;NRAS;SHC1;YWHAB;MAPK1;GRB2;SOS1
SHC1 events in EGFR signaling	7/17	0.00111611	0.00610926	5.91063	40.1799	MAP2K1;NRAS;SHC1;YWHAB;MAPK1;GRB2;SOS1
EGFR transactivation by gastrin	5/9	0.00117027	0.00637988	10.5483	71.2063	NRAS;MMP3;GRB2;SOS1;HBEGF
Integrated breast cancer pathway	29/152	0.00126378	0.00686199	1.999	13.3406	USP38;MAP3K7CL;AHR;BACH1;CASP9;CDC42;CCND1;MYC;CASP3;ABL1;MAPK1;PLK3;JUN;ANXA1;CHUK;GADD45A;STAT1;CSNK1D;NFKB1;SMAD7;HIPK2;VEGFA;ITPKC;WEE1;RHEB;CDK2;BCL2;CTNNB1;ZNF655
Netrin-mediated signaling events	10/32	0.00127431	0.00686403	3.84094	25.6012	CDC42;MAP2K1;MAP1B;PITPNA;ELMO1;MAPK1;FYN;PIK3R1;RHOA;BCAR1
Syndecan 4 pathway	10/32	0.00127431	0.00686403	3.84094	25.6012	ITGB1;SDCBP;SDC4;ADAM12;TNC;CXCR4;ITGA5;THBS1;RHOA;FGFR1
CTLA4 inhibitory signaling	8/22	0.00129452	0.0069452	4.82621	32.0924	CD86;LYN;PPP2CA;PPP2CB;PPP2R1B;PPP2R5B;PTPN11;FYN
Glycolysis	9/27	0.00132894	0.00707371	4.22398	27.977	PPP2CA;PPP2CB;PFKFB3;PPP2R1B;PGAM1;ALDOC;ALDOB;ALDOA;HK1
TNF/stress-related signaling	9/27	0.00132894	0.00707371	4.22398	27.977	MAP2K3;JUN;CHUK;CRADD;RIPK1;TNF;RELA;NFKB1;TNFRSF1A
Fibroblast growth factor receptor pathway	22/105	0.00135256	0.00717121	2.24487	14.8291	MAP2K3;MAP2K1;SHC1;SPRY4;CBLB;FRS2;PTPN11;PIK3R1;FGF1;FGF5;MAPK10;RPS6KA3;NRAS;FGF18;MAPK1;PRKCQ;GRB2;SPRY1;FGF13;SOS1;MAPK6;FGFR1
Myc repressed pathway	17/73	0.00138322	0.00730513	2.56883	16.9115	ITGB1;CDKN1A;CDKN2B;CEBPD;NFYA;GADD45A;SLC11A1;FOXO3;NDRG1;ZFP36L1;CCND1;MYC;CSDE1;ID2;BCL2;IRF8;TJP2
Transport of mature mRNAs derived from intronless transcripts	11/38	0.00149273	0.00785281	3.44329	22.406	NXF1;POM121;SEH1L;NUP188;NCBP2;ALYREF;NUP50;NUP88;NUP153;NUP98;RAN
Alternative NF-kappaB pathway	4/6	0.00159174	0.00827704	16.8712	108.7	CHUK;NFKB1;NFKB2;RELB
Low-density lipoprotein (LDL) pathway during atherogenesis	4/6	0.00159174	0.00827704	16.8712	108.7	IL6;CSF1;CCL2;LDLR
MSP/RON receptor signaling pathway	4/6	0.00159174	0.00827704	16.8712	108.7	CSF1;IL1B;CCL2;TNF
Syndecan 2 pathway	10/33	0.00165652	0.0085342	3.67374	23.5231	ITGB1;SDCBP;CSF2;CXCL8;TGFB1;CASP3;MAPK1;ITGA5;EZR;RHOA
Effect of METS on macrophage differentiation	7/18	0.00166013	0.0085342	5.373	34.3918	JUN;CSF1;DDX20;FOS;ETV3;ETS1;ETS2
TNFR2 signaling pathway	7/18	0.00166013	0.0085342	5.373	34.3918	CHUK;DUSP1;TNFAIP3;RIPK1;TNFRSF1B;NFKB1;RELA
Activation of NF-kappaB in B cells	16/68	0.00168429	0.00862563	2.60304	16.6241	PSMD12;CHUK;PSMD14;BCL10;RELA;NFKB1;PSMA1;PSMC4;PSME3;PSME4;UBC;CDK2;REL;PSMD1;MAP3K7;NFKBIB
TGF-beta receptor activation of SMADs	9/28	0.00177598	0.00906085	4.00144	25.3428	PPP1R15A;FKBP1A;TGFB1;SMURF1;UBC;PMEPA1;STRAP;FURIN;SMAD7
Cyclins and cell cycle regulation	8/23	0.00180194	0.00912443	4.50421	28.4616	CDKN2D;CDKN1A;CDKN2B;CCND3;CCND2;TFDP1;CCND1;CDK2
Eicosanoid metabolism	8/23	0.00180194	0.00912443	4.50421	28.4616	PTGER4;CYSLTR1;TBXA2R;PTGER2;ALOX5;ALOX5AP;PLA2G4A;PTGS2
Notch signaling pathway	24/121	0.00185543	0.00936023	2.09584	13.1821	NOTCH3;GSK3B;CDKN1A;TLE1;NOTCH1;FBXW7;CNTN6;STAT3;FURIN;PIK3R1;TNF;HIF1A;NFKB1;EFNB2;HEYL;ADAM17;CCND1;MYC;ADAM12;RBBP8;HES1;MAPT;BCL2L1;BIRC3
Angiotensin II-mediated activation of JNK pathway via Pyk2-dependent signaling	11/39	0.00188248	0.00946137	3.32013	20.8343	MAP2K3;ATF2;JUN;MAP2K1;SHC1;MAPK1;GRB2;FOS;CALM1;SOS1;BCAR1
Innate immune system	51/319	0.0019252	0.00964028	1.61726	10.1123	ATF2;UBE2D3;TNFAIP3;EEA1;PANX1;CASP9;C4A;RPS6KA3;PPP2R1B;CTSL;CASP4;LBP;MAP3K7;MAP2K3;MAP2K1;DUSP3;CHUK;IRAK3;FOS;TICAM1;DUSP6;IRF1;MAPKAPK2;PELI1;IRF7;TLR8;CD46;BIRC3;DEFB103A;CFH;TXN;RELA;PPP2CA;PPP2CB;IRAK2;UBC;S100A12;NLRP3;MAPK1;RIPK1;CD55;JUN;DEFA3;DEFA1;NFKB1;NFKB2;MAPK10;SAA1;BCL2;BCL2L1;NFKBIB
Adhesion and diapedesis of lymphocytes	6/14	0.00200599	0.00999379	6.33054	39.3229	ITGB1;IL1A;CXCL8;SELL;ICAM2;ICAM1
Signaling by FGFR mutants	12/45	0.00201798	0.00999379	3.07377	19.0748	FGF5;BCR;NRAS;STAT1;STAT3;FGF18;FRS2;GRB2;PIK3R1;FGF1;SOS1;FGFR1
Wnt interactions in lipid metabolism and immune response	12/45	0.00201798	0.00999379	3.07377	19.0748	KLF10;GJA1;CCND1;DUSP1;NOS3;MYC;IL1B;CXCL1;HES1;FOS;TNFRSF4;DUSP6
Mechanism of gene regulation by peroxisome proliferators via PPAR-alpha	14/57	0.00208484	0.010242	2.75316	16.9954	HSP90AA1;JUN;DUSP1;PDGFA;PIK3R1;PTGS2;TNF;RELA;ACOX1;MYC;EHHADH;FAT1;MAPK1;HSPA1A
Pathogenic Escherichia coli infection	14/57	0.00208484	0.010242	2.75316	16.9954	ITGB1;ARPC5L;WAS;TUBB4B;RHOA;CDC42;TUBB6;TUBB2A;TUBB3;ABL1;TUBB7P;CTNNB1;FYN;EZR
EPO receptor signaling	10/34	0.00212644	0.010242	3.52047	21.6625	JUN;MAP2K1;SOCS1;SHC1;STAT1;STAT3;MAPK1;GRB2;FOS;SOS1
Interleukin-7 interactions in immune response	10/34	0.00212644	0.010242	3.52047	21.6625	CDKN2D;JUN;CXCL8;CCL8;UBC;CXCL1;PPBP;CXCL2;LITAF;CXCL5
MAPK/TRK pathway	10/34	0.00212644	0.010242	3.52047	21.6625	MAP2K3;EGR1;NRAS;MAP2K1;RIT1;EHD4;SRF;MAPKAPK2;MAPK1;FOS
N-cadherin signaling events	10/34	0.00212644	0.010242	3.52047	21.6625	CDC42;PTPN1;GJA1;KIF5B;CTNNB1;PTPN11;PIK3R1;MAPRE1;RHOA;FGFR1
Activation of the AP-1 family of transcription factors	5/10	0.00213627	0.010242	8.43815	51.8836	MAPK10;ATF2;JUN;MAPK1;FOS
Free radical-induced apoptosis	5/10	0.00213627	0.010242	8.43815	51.8836	CXCL8;GPX1;TNF;NFKB1;RELA
Tetrahydrobiopterin (BH4) biosynthesis, recycling, salvage and regulation	5/10	0.00213627	0.010242	8.43815	51.8836	HSP90AA1;GCH1;NOS3;CALM1;PTS
Sema4D in semaphorin signaling	9/29	0.0023356	0.011158	3.80116	23.0331	CDC42;SEMA4D;LIMK2;RHOC;MET;MYL9;RHOA;RND1;RHOB
Destabilization of mRNA by butyrate response factor 1 (BRF1)	7/19	0.00238974	0.0113366	4.92498	29.73	ZFP36;YWHAB;MAPKAPK2;DCP1A;EXOSC3;TNPO1;ZFP36L1
FRS2-mediated activation	7/19	0.00238974	0.0113366	4.92498	29.73	MAP2K1;NRAS;YWHAB;MAPK1;FRS2;NGF;CRK
Dorso-ventral axis formation	8/24	0.00245413	0.0115609	4.22246	25.3769	NOTCH3;MAP2K1;NOTCH1;MAPK1;GRB2;SOS1;ETS1;ETS2
Tumor suppressor Arf inhibits ribosomal biogenesis	8/24	0.00245413	0.0115609	4.22246	25.3769	HSP90AA1;MYC;POLR1C;ABL1;PIK3R1;UBE2A;HSPA1A;NFKBIB
Bacterial invasion of epithelial cells	16/71	0.00270436	0.0126955	2.46065	14.5495	ITGB1;SHC1;ARPC5L;WAS;CBLB;PIK3R1;RHOA;CDC42;ELMO1;CTNNB1;ITGA5;DNM1L;CRK;MET;VCL;BCAR1
Differentiation pathway in PC12 cells	18/84	0.0027453	0.0128431	2.30762	13.61	MAP2K3;EGR1;MAP2K1;JUN;EGR3;ANXA2;SHC1;SRF;FRS2;ADCY2;PTPN11;FOS;NGF;MAPK10;RPS6KA3;NRAS;RIT1;PLCZ1
Epidermal growth factor receptor (EGFR) pathway	22/111	0.00283448	0.0131919	2.09283	12.2763	MAP2K3;MAP2K1;JUN;SHC1;SPRY4;RHOH;CBLB;PIK3R1;RHOC;RHOA;RHOB;MAPK10;RPS6KA3;NRAS;RHOJ;MAPK1;PRKCQ;GRB2;SPRY1;SOS1;MAPK6;RHOQ
ERK1/ERK2 MAPK pathway	15/65	0.00283938	0.0131919	2.53705	14.8777	ITGB1;MAP2K1;SHC1;STAT3;NGF;DUSP6;PPP2CA;RPS6KA3;NRAS;MYC;MKNK1;MAPK1;MAP3K8;GRB2;SOS1
Alpha-M beta-2 integrin signaling	11/41	0.00290995	0.0134275	3.09844	18.0937	LYN;FGR;SELP;IL6;PLAU;PLAUR;FYN;TNF;NFKB1;RHOA;ICAM1
Bioactive peptide-induced signaling pathway	11/41	0.00290995	0.0134275	3.09844	18.0937	MAP2K1;SHC1;STAT1;STAT3;MAPK1;FYN;GRB2;PIK3R1;MAPT;CALM1;SOS1
Nucleotide-binding domain, leucine rich repeat containing receptor (NLR) signaling pathways	12/47	0.0030028	0.0137236	2.8978	16.831	CASP9;PANX1;CHUK;IRAK2;CASP4;BCL2;TNFAIP3;NLRP3;TXN;MAP3K7;BCL2L1;BIRC3
Amyotrophic lateral sclerosis (ALS)	13/53	0.00300616	0.0137236	2.74741	15.9544	MAP2K3;GPX1;TNFRSF1B;TNF;TOMM40L;TNFRSF1A;CASP9;PPP3CC;CASP3;BCL2;CYCS;RAB5A;BCL2L1
Inactivation of GSK3 by Akt causes accumulation of beta-catenin in alveolar macrophages	9/30	0.0030266	0.0137236	3.61995	20.9968	PPP2CA;GSK3B;GJA1;CCND1;CTNNB1;PIK3R1;LBP;RELA;NFKB1
Calcium signaling by HBx of hepatitis B virus	6/15	0.00304518	0.0137236	5.62683	32.6029	JUN;MAP2K1;SHC1;GRB2;FOS;SOS1
Erythrocyte differentiation pathway	6/15	0.00304518	0.0137236	5.62683	32.6029	IL1A;CSF3;IL6;CSF2;TGFB1;CCL3
Fibrinolysis pathway	6/15	0.00304518	0.0137236	5.62683	32.6029	ZFHX3;SERPINB2;PLAU;SERPINE1;UBA1;UBE2A
Signaling to p38 via RIT and RIN	6/15	0.00304518	0.0137236	5.62683	32.6029	MAP2K1;NRAS;RIT1;YWHAB;MAPK1;NGF
Costimulation by the CD28 family	16/72	0.00314122	0.0140252	2.41657	13.927	CD86;LYN;CD274;MAPKAP1;PPP2R5B;PTPN11;PIK3R1;CDC42;PPP2CA;PPP2CB;PPP2R1B;BTLA;MAP3K8;FYN;GRB2;PAK2
MicroRNAs in cardiomyocyte hypertrophy	18/85	0.00314443	0.0140252	2.27305	13.0976	MAP2K3;GSK3B;MAP2K1;MYEF2;TGFB1;CHUK;STAT3;LIF;PIK3R1;TNF;RHOA;NFKB1;CDK9;RCAN1;MAPK1;CTNNB1;IL6ST;CALM1
TGF-beta regulation of skeletal system development	18/85	0.00314443	0.0140252	2.27305	13.0976	CDKN2B;TGFB1;SMURF1;FST;INHBB;TNF;THBS1;RHOA;SMAD7;PPP2CA;PPP2CB;BMP2;TFDP1;PPP2R1B;MYC;ID2;MAPK1;ID3
Phagosome	28/154	0.00315359	0.0140252	1.8829	10.844	ITGB1;COLEC11;RAB5C;NCF1;ITGB5;NCF4;CORO1A;THBS1;FCAR;EEA1;TUBB6;TUBB3;CLEC7A;CTSL;TUBB7P;OLR1;ATP6V0A4;ITGAV;FCGR1A;DYNC1I1;ATP6V1G2;TAP2;TAP1;TUBB4B;TUBB2A;FCGR2A;ITGA5;RAB5A
Corticotropin releasing hormone pathway	8/25	0.00327739	0.014528	3.97386	22.7333	NR4A2;NR4A1;GJA1;HSP90AA1;CXCL8;NOS3;BCL2;FOS
Apoptotic signaling in response to DNA damage	7/20	0.00334317	0.0147711	4.54588	25.9153	CASP9;STAT1;CASP3;BCL2;CYCS;EIF2S1;BCL2L1
Viral dsRNA-TLR3-TRIF complex activation of RIP1	4/7	0.00340163	0.0149805	11.2468	63.9213	CHUK;RIPK1;TICAM1;RELA
Ephrin receptor B forward pathway	14/60	0.00347336	0.0152467	2.57318	14.5709	LYN;MAP2K1;SHC1;CXCR4;PIK3R1;FGR;CDC42;EFNB2;NRAS;MAPK1;FYN;GRB2;MAP3K7;CRK
G alpha (i) signaling events	34/199	0.00354274	0.0154111	1.74713	9.85877	RGS18;NPB;CXCL8;C5AR1;FPR1;GNAI3;LPAR2;CXCR4;ADCY2;CXCL1;FPR2;CXCL2;CXCL5;RGS4;HCAR2;HCAR3;GNG10;GNG2;CXCR1;GNG5;RGS1;CXCR2;BDKRB2;S1PR1;BDKRB1;CCR7;S1PR4;P2RY13;ANXA1;CCL20;PPBP;ADRA2A;SAA1;RGS11
BMP receptor signaling	11/42	0.00357079	0.0154111	2.99832	16.8954	PPP1R15A;SKI;GSK3B;BMP2;SMURF1;BAMBI;FST;MAPK1;RGMB;MAP3K7;SMAD7
BTG family proteins and cell cycle regulation	5/11	0.00357568	0.0154111	7.0314	39.6121	BTG2;BTG1;CCND1;FGF1;NGF
CD28-dependent Vav1 pathway	5/11	0.00357568	0.0154111	7.0314	39.6121	CD86;CDC42;FYN;GRB2;PAK2
Erythropoietin-mediated neuroprotection through NF-kB	5/11	0.00357568	0.0154111	7.0314	39.6121	CDKN1A;SOD2;HIF1A;NFKB1;RELA
Binding of chemokines to chemokine receptors	13/54	0.00358179	0.0154111	2.68025	15.0949	CXCL8;CCL20;CXCR4;CXCL1;PPBP;CXCL2;CX3CL1;CXCL5;CXCR1;CXCR2;CCL3;CCL2;CCR7
mRNA stability regulation by proteins that bind AU-rich elements	18/86	0.00359061	0.0154111	2.2395	12.6071	HSPA8;PSMD12;PSMD14;YWHAB;ZFP36L1;ZFP36;PSMA1;PSMC4;PSME3;MAPKAPK2;PSME4;UBC;PSMD1;TNPO1;EXOSC3;DCP1A;EIF4G1;HSPA1A
Integrin-mediated cell adhesion	20/100	0.00385909	0.016347	2.11567	11.7575	MAP2K3;ITGB1;MAP2K1;ITGB5;SHC1;ITGA1;SORBS1;CDC42;MAPK10;MAPK1;GRB2;ITGAV;FYN;ITGA5;SOS1;MAPK6;CRK;PAK2;VCL;BCAR1
Telomerase regulation	15/67	0.00386755	0.016347	2.4392	13.5501	IFNAR2;HSP90AA1;JUN;TGFB1;FOS;SMG5;NFKB1;WRN;ZNFX1;CCND1;MYC;IRF1;ABL1;MAPK1;MXD1
CD28 co-stimulation	9/31	0.00386912	0.016347	3.45521	19.1928	CD86;CDC42;LYN;MAPKAP1;FYN;MAP3K8;GRB2;PIK3R1;PAK2
CD40/CD40L signaling	9/31	0.00386912	0.016347	3.45521	19.1928	MAPK10;JUN;MYC;TNFAIP3;CBLB;RELA;NFKB1;BCL2L1;BIRC3
Signal amplification	9/31	0.00386912	0.016347	3.45521	19.1928	GNA13;GNA14;GNA15;GNG10;GNG2;GNG5;TBXA2R;GNAI3;PLA2G4A
Wnt signaling pathway	38/231	0.00417227	0.0175729	1.66994	9.15009	GSK3B;WNT2B;PRICKLE2;PPP2CA;PPP2CB;GJA1;CCND3;PPP3CC;CCND2;PPP2R1B;SOX17;CCND1;PLAU;MYC;SOX8;SOX7;LDLR;MAP3K7;DACT1;JUN;TLE2;TLE1;FZD5;CSNK1A1;PPP2R5B;NFATC2;CSNK1D;SOX11;NFATC1;SENP2;RHOA;FOSL1;MAPK10;PPP2R2B;RARA;CTNNB1;PRKCQ;PPARD
PI3K/AKT activation	10/37	0.00420581	0.0176592	3.12878	17.1185	CASP9;GSK3B;NR4A1;CDKN1A;CHUK;MAPKAP1;PIK3R1;FOXO3;NGF;RHOA
T cell receptor signaling in naive CD8+ T cells	13/55	0.00424359	0.0177626	2.61628	14.291	CD86;CHUK;SHC1;BCL10;NRAS;STIM1;RASSF5;MAP3K8;LCP2;PRKCQ;FYN;GRB2;SOS1
Interleukin-27-mediated signaling events	8/26	0.00429974	0.0179421	3.75288	20.4502	IL6;TGFB1;STAT1;IL1B;STAT3;IL6ST;TNF;IL27RA
G alpha i pathway	21/108	0.00440964	0.0182967	2.04288	11.0805	MAP2K3;RGS18;MAP2K1;SHC1;RGS16;STAT3;ITPR1;ADCY2;ADRA2A;RGS4;MAPK10;RGS2;NRAS;RGS1;MAPK1;PRKCQ;GRB2;RGS11;SOS1;MAPK6;HBEGF
Interleukin-10 anti-inflammatory signaling pathway	6/16	0.00443885	0.0182967	5.06386	27.4328	IL1A;IL6;STAT1;STAT3;HMOX1;TNF
KIT signaling regulation	6/16	0.00443885	0.0182967	5.06386	27.4328	LYN;SOCS1;FYN;GRB2;SOS1;SH2B2
TGF-beta receptor signaling in EMT (epithelial to mesenchymal transition)	6/16	0.00443885	0.0182967	5.06386	27.4328	FKBP1A;TGFB1;PARD6A;SMURF1;UBC;RHOA
CD8/T cell receptor downstream pathway	15/68	0.00448545	0.0184326	2.39304	12.939	IFNAR2;EGR1;MAP2K1;JUN;NFATC2;NFATC1;FOS;TNF;FOSL1;NRAS;MAPK1;PRKCQ;JUNB;TNFRSF4;IFNAR1
Antigen presentation: folding, assembly, and peptide loading of class I MHC proteins	41/255	0.00455103	0.0186454	1.62538	8.76468	PSMD12;NCF1;UBE2D4;PSMD14;ITGB5;SAR1B;UBA6;NCF4;UBE2D3;RNF19B;CBLB;RNF6;UBR1;UBE2L3;ANAPC11;SOCS3;SOCS1;ASB10;UBC;PSMD1;ITGAV;FCGR1A;TRIM21;UBE2H;FBXW7;SMURF1;TAP2;UBE2E1;KLHL21;TAP1;LNPEP;UBE2G1;UBE2A;SPSB1;PSMA1;PSMC4;PSME3;NEDD4;PSME4;TRIM36;UBA1
G-protein signaling pathways	19/95	0.00478173	0.0195314	2.11514	11.3011	PDE4D;GNAI3;ITPR1;ADCY2;RHOA;AKAP12;GNA13;AKAP13;GNA14;GNA15;GNG10;NRAS;PPP3CC;GNG5;GNA12;PDE4B;ARHGEF1;PRKCQ;CALM1
Messenger RNA processing	34/203	0.00487977	0.0198313	1.70539	9.0772	POM121;SEH1L;NUP188;DHX9;CELF1;CELF2;DDX20;LSM10;PTBP1;NXF1;TRA2B;POLR2D;CSTF1;DHX15;NUP88;SRSF10;POLR2L;RBM39;CPSF7;NCBP2;ALYREF;NUP153;HNRNPAB;CLK3;CLK1;HNRNPM;SFPQ;PRPF18;HNRNPF;NUP50;SRSF2;SRSF4;NUP98;SNRPB
Serotonin HTR1 group and FOS pathway	9/32	0.00488448	0.0198313	3.3048	17.5871	ELK4;MAP2K3;MAP2K1;SRF;MAPKAPK2;GNAI3;ITPR1;FOS;RHOA
Platelet homeostasis	17/82	0.00506638	0.0205082	2.21202	11.6908	GUCY1A2;TRPC6;NOS3;PPP2R5B;ITPR1;ATP2B4;ATP2A2;PLA2G4A;PTPN11;FGR;PPP2CA;PPP2CB;GNG10;GNG2;PPP2R1B;STIM1;GNG5
p38 alpha/beta MAPK downstream pathway	10/38	0.00517477	0.0208844	3.01687	15.8807	ELK4;ATF2;CEBPB;JUN;MKNK1;MAPKAPK2;PLA2G4A;PTGS2;ATF6;RAB5A
PI3K events in ERBB2 signaling	11/44	0.00525001	0.021125	2.81629	14.7842	CASP9;GSK3B;NR4A1;CDKN1A;CHUK;MAPKAP1;GRB2;PIK3R1;FOXO3;EREG;HBEGF
Leukocyte transendothelial migration	22/117	0.00549616	0.0220071	1.95999	10.1992	ITGB1;NCF1;NCF4;GNAI3;MSN;RHOH;CXCR4;PTPN11;ACTN4;PIK3R1;RHOA;ICAM1;CDC42;CLDN15;RASSF5;CTNNB1;ESAM;EZR;MYL9;VCL;BCAR1;RAPGEF4
Cooperation of prefoldin and TriC/CCT in actin and tubulin folding	8/27	0.00555061	0.0220071	3.55516	18.4649	CCT6A;CCT2;TUBB6;TUBB2A;TUBB3;TCP1;TUBB4B;CCT5
Rev-mediated nuclear export of HIV-1 RNA	8/27	0.00555061	0.0220071	3.55516	18.4649	POM121;SEH1L;NUP188;NUP50;NUP88;NUP153;NUP98;RAN
VEGFR1 pathway	8/27	0.00555061	0.0220071	3.55516	18.4649	NRP2;HSP90AA1;NOS3;MAPK1;PTPN11;PIK3R1;HIF1A;VEGFA
eIF4E and p70 S6 kinase regulation	8/27	0.00555061	0.0220071	3.55516	18.4649	PPP2CA;EIF4A1;PSMC4;MKNK1;MAPK1;PIK3R1;EIF4G2;EIF4G1
Response to elevated platelet cytosolic calcium	17/83	0.00575593	0.0227544	2.17839	11.2351	SRGN;SERPINA1;TGFB1;WDR1;VWF;SERPINE1;PDGFA;VEGFC;ACTN4;PPBP;THBS1;F5;VEGFA;SELP;ALDOA;CALM1;VCL
Complement and coagulation cascades	15/70	0.00596186	0.0234998	2.30576	11.811	SERPINA1;VWF;CFH;SERPINE1;C5AR1;PLAUR;F5;C4A;THBD;PLAU;BDKRB2;BDKRB1;CD59;CD46;CD55
Factors involved in megakaryocyte development and platelet production	23/125	0.00604109	0.0237429	1.90861	9.75143	DOCK6;NFE2;HBG2;HBG1;ITPK1;JMJD1C;HBB;HBD;KLC1;EHD1;CDC42;DOCK11;WEE1;KIF5B;MAFG;IRF1;CDK2;MAFF;ABL1;IRF7;MAFK;RAB5A;SH2B2
Smooth muscle contraction	7/22	0.0060853	0.0237784	3.93932	20.0979	ITGB5;TPM3;ITGA1;SORBS1;CALM1;MYL9;VCL
TRAF6 mediated NF-kB activation	7/22	0.0060853	0.0237784	3.93932	20.0979	CHUK;SAA1;S100A12;NFKB1;RELA;NFKB2;NFKBIB
CHL1 interactions	4/8	0.00623326	0.0239414	8.43464	42.8299	ITGB1;STIP1;CNTN6;ITGA1
Cross-presentation of particulate exogenous antigens (phagosomes)	4/8	0.00623326	0.0239414	8.43464	42.8299	ITGB5;NCF1;NCF4;ITGAV
Dissolution of fibrin clot	4/8	0.00623326	0.0239414	8.43464	42.8299	SERPINB2;PLAU;SERPINE1;PLAUR
Formyl peptide interaction with formyl peptide receptors	4/8	0.00623326	0.0239414	8.43464	42.8299	ANXA1;FPR1;SAA1;FPR2
Sema4D-mediated inhibition of cell attachment and migration	4/8	0.00623326	0.0239414	8.43464	42.8299	SEMA4D;MET;RHOA;RND1
Transcription factor regulation of microRNAs related to cardiac hypertrophy	4/8	0.00623326	0.0239414	8.43464	42.8299	MYEF2;TGFB1;STAT3;NFKB1
Eukaryotic protein translation	6/17	0.00625125	0.0239425	4.60326	23.3614	EIF4A1;EIF5;EIF2S1;EIF4G2;EIF1;EIF4G1
G alpha (12/13) signaling events	16/77	0.00628532	0.023964	2.21787	11.2436	PLEKHG2;PIK3R1;RHOC;RHOA;RHOB;CDC42;GNA13;AKAP13;FGD4;GNG10;GNG2;GNG5;TBXA2R;GNA12;ARHGEF1;SOS1
Interleukin-3, interleukin-5, and GM-CSF signaling	11/45	0.00629567	0.023964	2.7333	13.8521	LYN;CSF2;SHC1;IL3RA;IL5RA;FYN;PTPN11;GRB2;PIK3R1;SOS1;CRK
GAB1 signalosome	10/39	0.00631004	0.023964	2.91268	14.7545	CASP9;GSK3B;NR4A1;CDKN1A;CHUK;MAPKAP1;PTPN11;GRB2;PIK3R1;FOXO3
Integrin signaling pathway	27/155	0.00669386	0.0253504	1.78623	8.94286	ITGB1;SHC1;WAS;NOLC1;NEDD9;CDC42;NRAS;ABL1;MAPK1;FYN;MAPK6;MAP2K3;MAP2K1;JUN;RHOH;RHOC;RHOA;RHOB;BCR;MAPK10;RHOJ;GRB2;SOS1;CRK;VCL;RHOQ;BCAR1
Signal transduction	133/1020	0.00679344	0.0256557	1.28017	6.39036	CCNT1;ICAM2;ARHGDIG;ICAM3;ICAM4;OR1K1;FGF1;ICAM1;FGF5;CYSLTR1;EDNRB;CCND1;MYC;JUNB;LHCGR;MAP2K1;ATP6V1G2;FBXW7;FRS2;EREG;BCR;ADAM17;COL4A1;CDC37;MAPKAPK2;ADAM12;DGKH;NOTCH3;NOTCH1;MAPKAP1;C5AR1;FPR1;ITPR1;LPAR2;FPR2;ADRB2;FOXO3;HIF1A;HCAR2;HCAR3;GNG10;ATP6V0A4;LYN;JUN;FZD5;NFKB1;CDK9;NR4A1;BMP2;AGO3;FES;AGO2;FGF18;GNRH2;GRB2;CALM1;EIF4G1;FGFR1;ARHGAP9;ITGB1;GSK3B;NRP2;CDKN1A;CXCL8;ITGB5;CAB39L;AT…
Cell cycle: G1/S checkpoint	8/28	0.00706047	0.0264425	3.37721	16.7281	GSK3B;CDKN1A;CDKN2B;TGFB1;TFDP1;CCND1;CDK2;ABL1
PERK-regulated gene expression	8/28	0.00706047	0.0264425	3.37721	16.7281	CXCL8;NFYA;CCL2;EXOSC3;EIF2S1;ATF6;ATF3;ATF4
TRAIL signaling pathway	8/28	0.00706047	0.0264425	3.37721	16.7281	CHUK;SMPD1;MAPK1;TNFRSF10B;RIPK1;TNFRSF10A;PIK3R1;TNFRSF10D
Endometrial cancer	12/52	0.0072138	0.0269422	2.53486	12.5013	CASP9;GSK3B;MAP2K1;NRAS;CCND1;MYC;MAPK1;CTNNB1;GRB2;PIK3R1;SOS1;FOXO3
Alpha-6 beta-1 and alpha-6 beta-4 integrin signaling	11/46	0.0074978	0.0279257	2.65506	12.9916	ITGB1;LAMA5;IL1A;LAMB3;SHC1;YWHAB;GRB2;PIK3R1;MET;YWHAG;YWHAH
BAD phosphorylation mediated by IGF1R signaling	7/23	0.00795927	0.0294015	3.69291	17.8494	MAP2K1;SHC1;MAPK1;GRB2;PIK3R1;SOS1;YWHAH
Collagen binding in corneal epithelia mediated by Erk and PI-3 Kinase	7/23	0.00795927	0.0294015	3.69291	17.8494	ITGB1;MAP2K1;SHC1;MAPK1;FYN;PIK3R1;RHOA
Modulation of interferon signaling by chaperones	7/23	0.00795927	0.0294015	3.69291	17.8494	CHUK;TNFRSF1B;TNF;NFKB1;RELA;TNFRSF1A;HSPA1A
Antigen processing: cross presentation	16/79	0.00810097	0.0296816	2.14722	10.3405	PSMD12;ITGB5;NCF1;PSMD14;NCF4;TAP2;TAP1;LNPEP;PSMA1;PSMC4;PSME3;PSME4;UBC;PSMD1;ITGAV;FCGR1A
Unfolded protein response	16/79	0.00810097	0.0296816	2.14722	10.3405	ACADVL;XBP1;CXCL8;NFYA;SHC1;GOSR2;PPP2R5B;EIF2S1;ERN1;LMNA;CCL2;DNAJB9;EXOSC3;ATF6;ATF3;ATF4
p73 transcription factor network	16/79	0.00810097	0.0296816	2.14722	10.3405	PLK3;CDKN1A;SERPINA1;IL4R;SERPINE1;AEN;IL1RAP;FOXO3;RELA;MYC;PEA15;HSF1;CDK2;ABL1;HAGH;DEDD
Alpha-hemoglobin stabilizing enzyme (AHSP) pathway	5/13	0.00830991	0.030283	5.27296	25.2591	ALAS2;ALAS1;HMBS;HBB;AHSP
Keap1-Nrf2 pathway	5/13	0.00830991	0.030283	5.27296	25.2591	NQO1;CEBPB;HMOX1;GCLM;NFE2L2
Protein folding	12/53	0.00844531	0.0306937	2.4729	11.806	NOP56;CCT6A;CCT2;ARFGEF2;TUBB6;TUBB2A;TUBB3;FBXW7;SPHK1;TCP1;TUBB4B;CCT5
Human cytomegalovirus and MAP kinase pathways	6/18	0.00854682	0.0309794	4.21941	20.0937	MAP2K3;MAP2K1;MAPK1;PIK3R1;NFKB1;RELA
Association of TriC/CCT with target proteins during biosynthesis	8/29	0.00886042	0.0319448	3.21621	15.2003	NOP56;CCT6A;ARFGEF2;CCT2;FBXW7;SPHK1;TCP1;CCT5
IGF1 pathway	8/29	0.00886042	0.0319448	3.21621	15.2003	PTPN1;SHC1;PTPN11;GRB2;PIK3R1;SOS1;CRK;BCAR1
Degradation of beta-catenin by the destruction complex	15/73	0.00888516	0.0319488	2.18613	10.3259	GSK3B;PSMD12;PSMD14;CSNK1A1;PPP2R5B;PPP2CA;PPP2CB;PPP2R1B;PSMA1;PSMC4;PSME3;PSME4;UBC;PSMD1;CTNNB1
L1CAM interactions	18/94	0.00938515	0.0336571	2.00286	9.35062	ITGB1;NRP2;MAP2K1;CNTN6;ITGA1;MSN;SPTA1;RPS6KA3;SDCBP;STIP1;MAPK1;ITGAV;NRCAM;NCAM1;ITGA5;EZR;SPTBN1;FGFR1
Natural killer cell-mediated cytotoxicity	24/137	0.00947315	0.0338828	1.79747	8.37493	IFNAR2;MAP2K1;CSF2;SHC1;ICAM2;NFATC2;TNFRSF10B;NFATC1;TNFRSF10A;PTPN11;PIK3R1;TNF;ICAM1;TNFRSF10D;NRAS;PPP3CC;CASP3;SH3BP2;MAPK1;GRB2;LCP2;FYN;SOS1;IFNAR1
Adipocytokine signaling pathway	14/67	0.00970761	0.0346298	2.23244	10.347	CHUK;STAT3;ACSL4;PTPN11;TNFRSF1B;TNF;RELA;NFKB1;TNFRSF1A;MAPK10;SOCS3;LEP;PRKCQ;NFKBIB
Non-small cell lung cancer	12/54	0.00983489	0.0349915	2.41389	11.1565	CASP9;RASSF1;MAP2K1;NRAS;CCND1;RASSF5;MAPK1;E2F3;GRB2;PIK3R1;SOS1;FOXO3
Adherens junction cell adhesion	15/74	0.0100788	0.0355609	2.14896	9.87944	PTPN1;WAS;ACTN4;SORBS1;RHOA;CDC42;PTPRB;SNAI1;MAPK1;CTNNB1;FYN;MAP3K7;MET;VCL;FGFR1
E2F transcription factor network	15/74	0.0100788	0.0355609	2.14896	9.87944	CDKN1A;CES1P1;SERPINE1;TFE3;CCND3;TFDP1;RYBP;PLAU;MYC;CDK2;RBBP8;E2F3;E2F6;CES1;MCL1
Integrins in angiogenesis	15/74	0.0100788	0.0355609	2.14896	9.87944	HSP90AA1;COL15A1;CSF1;COL12A1;PTPN11;PIK3R1;PIK3C2A;RHOA;VEGFA;COL4A1;MAPK1;ITGAV;PI4KB;VCL;BCAR1
Axonal growth stimulation	3/5	0.0101264	0.0355609	12.6474	58.0845	ARHGEF1;NGF;RHOA
Maturation of Notch precursor via proteolytic cleavage	3/5	0.0101264	0.0355609	12.6474	58.0845	NOTCH3;NOTCH1;FURIN
Endogenous Toll-like receptor signaling	7/24	0.0102261	0.0356294	3.47548	15.9275	CHUK;IRAK2;TICAM1;S100A9;RHOA;S100A8;HSPD1
Abl role in Robo-Slit signaling	4/9	0.0102837	0.0356294	6.74733	30.8839	GPC1;ABL1;ABL2;CAP2
Axonogenesis regulation by p75 neurotrophin receptor	4/9	0.0102837	0.0356294	6.74733	30.8839	ARHGEF1;NGF;RHOA;RTN4
Folding of actin by CCT/TriC	4/9	0.0102837	0.0356294	6.74733	30.8839	CCT6A;CCT2;TCP1;CCT5
cAMP receptor, G-protein-independent pathways inferred from amoeba model	4/9	0.0102837	0.0356294	6.74733	30.8839	KLF6;STAT1;STAT3;MAPK1
Signaling by insulin receptor	20/109	0.0103041	0.0356294	1.90076	8.6964	MAP2K1;ATP6V1G2;SHC1;CAB39L;YWHAB;FRS2;PTPN11;PIK3R1;FGF1;FGF5;NRAS;RHEB;FGF18;MAPK1;ATP6V0A4;GRB2;SOS1;CRK;EIF4G1;FGFR1
Ovarian infertility genes	8/30	0.0109818	0.0376838	3.06985	13.8497	EGR1;CEBPB;LHCGR;CCND2;PTGER2;SMPD1;GJA4;MSH5
Signaling by FGFR1 mutants	8/30	0.0109818	0.0376838	3.06985	13.8497	FGF5;BCR;STAT1;STAT3;GRB2;PIK3R1;FGF1;FGFR1
Signaling pathway from G-protein families	8/30	0.0109818	0.0376838	3.06985	13.8497	RPS6KA3;JUN;MAP2K1;PPP3CC;NFATC2;NFATC1;FOS;CALM1
IGF-1 receptor and longevity	6/19	0.0113886	0.0387095	3.89463	17.429	SHC1;GRB2;PIK3R1;FOXO3;SOD2;SOS1
Small ligand GPCRs	6/19	0.0113886	0.0387095	3.89463	17.429	PTGER4;TBXA2R;PTGER2;PTAFR;S1PR1;S1PR4
TP53 network	6/19	0.0113886	0.0387095	3.89463	17.429	CDKN1A;GADD45A;MYC;ABL1;BCL2;PMAIP1
Transport of mature transcript to cytoplasm	12/55	0.0113953	0.0387095	2.35762	10.5493	NXF1;POM121;SEH1L;NUP188;NCBP2;NUP50;ALYREF;SRSF2;SRSF4;NUP88;NUP153;NUP98
Interferon gamma signaling regulation	5/14	0.0118121	0.0397262	4.68681	20.803	PTPN1;SOCS3;SOCS1;STAT1;PTPN11
Interleukin-6 regulation of target genes	5/14	0.0118121	0.0397262	4.68681	20.803	ABCC1;SERPINA1;ITGA5;SLC38A2;ICAM1
T cell receptor/JNK pathway	5/14	0.0118121	0.0397262	4.68681	20.803	JUN;LCP2;MAP3K8;CRK;MAP3K7
T cell receptor/Ras pathway	5/14	0.0118121	0.0397262	4.68681	20.803	MAP2K1;NRAS;MAPK1;MAP3K8;FOS
HIV life cycle	21/118	0.0122604	0.0411317	1.83125	8.06001	POM121;SEH1L;CCNT1;NUP188;ELL;NCBP2;TAF13;GTF2B;HMGA1;VPS37C;CXCR4;NUP153;VPS37B;CDK9;NUP50;UBC;POLR2D;NUP88;NUP98;RAN;POLR2L
VEGF signaling pathway	15/76	0.0128426	0.0429408	2.07827	9.05082	MAP2K1;NOS3;SPHK1;PLA2G4A;NFATC2;NFATC1;PIK3R1;PTGS2;VEGFA;CASP9;CDC42;NRAS;PPP3CC;MAPKAPK2;MAPK1
Beta-3 integrin cell surface interactions	10/43	0.0128812	0.0429408	2.55905	11.137	SDC4;PLAU;COL4A1;SPHK1;TNC;PLAUR;ITGAV;PVR;THBS1;VEGFA
DARPP-32 events	7/25	0.0129284	0.0429408	3.28221	14.2722	PPP2CA;PPP2CB;PPP3CC;PPP2R1B;PDE4D;PDE4B;CALM1
Interferon alpha signaling regulation	7/25	0.0129284	0.0429408	3.28221	14.2722	IFNAR2;SOCS3;PTPN1;SOCS1;STAT1;PTPN11;IFNAR1
T cell signal transduction	16/83	0.0129768	0.0429408	2.01857	8.76987	MAP2K3;MAP2K1;NFATC2;CBLB;NFATC1;NFKB1;NFKB2;LAT2;MAPK10;NRAS;MAPK1;LCP2;PRKCQ;GRB2;SOS1;MAPK6
Gap junction pathway	17/90	0.0129902	0.0429408	1.96873	8.55128	GUCY1A2;MAP2K1;GNAI3;ITPR1;PDGFA;CSNK1D;ADCY2;TUBB4B;GJA1;TUBB6;NRAS;TUBB2A;TUBB3;TUBB7P;MAPK1;GRB2;SOS1
Platelet aggregation (plug formation)	9/37	0.0133559	0.044042	2.7139	11.7126	PTPN1;VWF;SHC1;GRB2;SOS1;CRK;ADRA2A;BCAR1;RAPGEF4
MicroRNA regulation of DNA damage response	14/70	0.0142074	0.0467358	2.11249	8.98653	CDKN1A;GADD45B;GADD45A;TNFRSF10B;CASP9;CCND3;CCND2;CCND1;CASP3;MYC;CDK2;ABL1;PMAIP1;CYCS
Transcriptional regulation of white adipocyte differentiation	15/77	0.014429	0.0473496	2.04463	8.6662	CEBPB;TGFB1;CEBPD;MED8;MED19;KLF4;TNF;MED26;RELA;NFKB1;HELZ2;CCND3;MED13;LEP;ANGPTL4
4-1BB-dependent immune response	6/20	0.0148366	0.0484519	3.61624	15.2267	MAP2K3;ATF2;JUN;CHUK;NFKB1;RELA
Estrogen receptor signaling pathway	6/20	0.0148366	0.0484519	3.61624	15.2267	JUN;MAP2K1;BCL2;MAPK1;FOS;NFKB1
Mitotic G1-G1/S phases	23/135	0.0150403	0.0489987	1.73722	7.29117	CDKN2D;PSMD12;CDKN1A;CDKN2B;PSMD14;DYRK1A;CDC7;PPP2CA;PPP2CB;CCND3;WEE1;CCND2;TFDP1;CCND1;PPP2R1B;PSMA1;PSMC4;MYC;PSME3;UBC;CDK2;PSMD1;E2F3
Interactions of HIV Vpr protein with host cellular proteins	10/44	0.0151257	0.0491584	2.48364	10.4099	POM121;SEH1L;NUP188;NUP50;HMGA1;NUP88;NUP153;NUP98;RAN;HSPA1A
HIV factor interactions with host	22/128	0.0155658	0.0504676	1.75551	7.30761	POM121;PSMD12;SEH1L;CCNT1;NUP188;PSMD14;HMGA1;NUP153;CDK9;PSMA1;PSMC4;PSME3;NUP50;PSME4;UBC;ELMO1;PSMD1;NUP88;FYN;NUP98;PAK2;RAN
ERBB4 signaling events	9/38	0.0158949	0.0512887	2.62017	10.8521	ADAM17;SHC1;NEDD4;MAPK1;FYN;GRB2;PIK3R1;EREG;HBEGF
Signaling events mediated by HDAC class II	9/38	0.0158949	0.0512887	2.62017	10.8521	HSP90AA1;GNG2;TUBB2A;BCL6;YWHAB;SRF;NUP153;BCOR;RAN
Melanoma	14/71	0.0160183	0.0514412	2.07532	8.5794	CDKN1A;MAP2K1;PDGFA;PIK3R1;FGF1;FGF5;NRAS;CCND1;FGF18;MAPK1;E2F3;FGF13;MET;FGFR1
Viral myocarditis	14/71	0.0160183	0.0514412	2.07532	8.5794	CD86;ICAM1;CASP9;CCND1;SGCB;CASP3;ABL1;ABL2;CYCS;DMD;FYN;CD55;EIF4G2;EIF4G1
RXR/VDR pathway	7/26	0.0161074	0.0515209	3.10929	12.8366	NR4A1;TGFB1;NR1H2;BCL2;RARA;TNF;PPARD
Protein processing in the endoplasmic reticulum	27/166	0.0161747	0.0515209	1.64385	6.77974	PPP1R15A;UBE2D4;SAR1B;UBE2D3;DNAJB1;HSPH1;UBQLN1;MAN1A1;SEC23B;UGGT1;HSPA8;XBP1;HSP90AA1;DNAJB12;UBE2E1;UBE2G1;EIF2S1;ERN1;DNAJA1;MAPK10;BCL2;ATF6;CRYAB;HSPA1B;ATF4;NFE2L2;HSPA1A
Hematopoiesis regulation by cytokines	5/15	0.0161956	0.0515209	4.21789	17.3905	CSF3;IL6;CSF2;CXCL8;CSF1
TrkA receptor signaling pathway	5/15	0.0161956	0.0515209	4.21789	17.3905	SHC1;GRB2;PIK3R1;NGF;SOS1
Alpha-synuclein signaling	8/32	0.0163129	0.0517724	2.81371	11.5807	LYN;FGR;FKBP1A;UCHL1;MAPK1;FYN;UBE2L3;SNCA
Integrin-linked kinase signaling	10/45	0.0176485	0.0558801	2.41255	9.73971	CDC42;GSK3B;HSP90AA1;JUN;CCND1;CDC37;SNAI1;CTNNB1;MYL9;LIMS1
Interleukin-1-beta (IL-1b) processing pathway	3/6	0.0186612	0.0586742	8.43113	33.5669	STS;IL1B;NLRP3
NF-kappaB activation	3/6	0.0186612	0.0586742	8.43113	33.5669	SQSTM1;NFKB1;RELA
Proteolysis and signaling pathway of Notch	3/6	0.0186612	0.0586742	8.43113	33.5669	ADAM17;NOTCH1;FURIN
Mitochondrial role in apoptotic signaling	6/21	0.0189468	0.0592966	3.37496	13.3855	CASP9;CASP3;BCL2;CYCS;BCL2L1;BIRC3
Prion pathway	6/21	0.0189468	0.0592966	3.37496	13.3855	LAMA5;DNAJB1;LAMB3;DNAJB6;BCL2;NFE2L2
Fc gamma receptor-mediated phagocytosis	17/94	0.0195568	0.0610641	1.86604	7.34179	LYN;MAP2K1;MARCKSL1;NCF1;SPHK1;LIMK2;ARPC5L;WAS;PLA2G4A;PIK3R1;CDC42;SCIN;FCGR2A;MAPK1;DNM1L;FCGR1A;CRK
ERK5 role in neuronal survival pathway	7/27	0.0198022	0.0615462	2.95366	11.5841	MAP2K1;SHC1;MAPK1;GRB2;PIK3R1;NGF;SOS1
Proteins and DNA sequences in cardicac structures	7/27	0.0198022	0.0615462	2.95366	11.5841	BMP2;NOTCH1;TGFB1;ATP2A2;NFATC2;NFATC1;PTPN11
Beta-1 integrin cell surface interactions	13/66	0.0200161	0.0619262	2.072	8.10405	ITGB1;LAMA5;LAMB3;ITGA1;TNC;PLAUR;THBS1;VEGFA;PLAU;COL4A1;ITGAV;ITGA5;TGM2
Destabilization of mRNA by AUF1 (hnRNP D0)	13/66	0.0200161	0.0619262	2.072	8.10405	HSPA8;PSMD12;PSMD14;CCND1;PSMA1;PSMC4;PSME3;PSME4;UBC;PSMD1;FCGR1A;EIF4G1;HSPA1A
Opioid signaling	15/80	0.0201058	0.0619676	1.94993	7.6179	PDE4D;GNAI3;ITPR1;PLA2G4A;ADCY2;PPP2CA;PPP2CB;GNG10;PPP3CC;GNG2;PPP2R1B;GNG5;PDE4B;MAPK1;CALM1
HIV infection	31/200	0.0201211	0.0619676	1.55268	6.06476	POM121;PSMD12;SEH1L;ELL;CCNT1;NUP188;PSMD14;GTF2B;CXCR4;UBC;POLR2D;PSMD1;NUP88;FYN;PAK2;POLR2L;NCBP2;TAF13;HMGA1;VPS37C;NUP153;VPS37B;CDK9;PSMA1;PSMC4;PSME3;NUP50;PSME4;ELMO1;NUP98;RAN
B cell survival pathway	5/16	0.0215395	0.0655321	3.83423	14.7153	ITGB1;JUND;CASP3;FOS;PIK3R1
CD40L signaling pathway	5/16	0.0215395	0.0655321	3.83423	14.7153	CHUK;DUSP1;TNFAIP3;NFKB1;RELA
Inhibitor of DNA binding (ID) signaling pathway	5/16	0.0215395	0.0655321	3.83423	14.7153	ELK4;ID2;CDK2;ID3;ELK3
Serotonin receptor 2 and ELK-SRF/GATA4 signaling	5/16	0.0215395	0.0655321	3.83423	14.7153	ELK4;MAP2K1;SRF;MAPKAPK2;ITPR1
p75 neurotrophin receptor signaling via NF-kB	5/16	0.0215395	0.0655321	3.83423	14.7153	UBC;NGF;SQSTM1;NFKB1;RELA
JNK/MAPK pathway	11/53	0.0215694	0.0655321	2.21168	8.48508	CDC42;MAPK10;ATF2;JUN;DUSP10;IL1R1;SHC1;GADD45A;DUSP16;MAP3K7;DUSP6
Natural killer cell receptor signaling pathway	12/60	0.02221	0.0673271	2.11144	8.0387	MAP2K3;LAT2;MAPK10;MAP2K1;NRAS;SHC1;MAPK1;LCP2;GRB2;PILRA;SOS1;MAPK6
G1 to S cell cycle control	13/67	0.0224978	0.0680469	2.03352	7.71586	CDKN2D;CDKN1A;CDKN2B;GADD45A;CCND3;WEE1;CCND2;TFDP1;CCND1;MYC;CDK2;E2F3;E2F6
Stress fiber formation mediated by Rho-selective guanine exchange factor AKAP13	4/11	0.0226522	0.0683611	4.81898	18.2519	AKAP13;GNA12;LPAR2;RHOA
Ephrin receptor A forward pathway	8/34	0.0232931	0.0701388	2.59698	9.7636	LYN;FGR;EPHA4;ARHGEF15;FYN;CRK;RHOA;EPHA2
LKB1 signaling events	10/47	0.0236025	0.0709123	2.28188	8.54886	GSK3B;HSP90AA1;YWHAB;MYC;CDC37;SIK1;MAPT;EZR;YWHAG;YWHAH
T cell receptor downstream signaling	6/22	0.0237699	0.0712571	3.16385	11.8307	CHUK;PRKCQ;BCL10;MAP3K7;NFKB1;RELA
Interleukin receptor SHC signaling	7/28	0.0240495	0.0719357	2.81285	10.4853	CSF2;SHC1;IL3RA;IL5RA;GRB2;PIK3R1;SOS1
Calcium regulation in the cardiac cell	24/149	0.0248846	0.0742693	1.62381	5.99756	RGS18;YWHAB;KCNB1;RGS16;ITPR1;GNAI3;ATP2A2;ATP1B3;ADCY2;ADRB2;RGS4;FKBP1A;GJA1;RGS2;GNG2;GNG5;RGS1;GJA5;GJA4;PRKCQ;RGS11;CALM1;YWHAG;YWHAH
Androgen receptor proteolysis and transcription regulation	12/61	0.0250648	0.0746422	2.06823	7.62411	TGIF1;RPS6KA3;CCND3;HIP1;LATS2;TMF1;CCND1;MAK;SRF;CTNNB1;CMTM2;CDK11B
ERBB1 internalization pathway	9/41	0.0256196	0.0761269	2.37413	8.69975	CDC42;NRAS;SHC1;UBE2D3;CBLB;GRB2;PIK3R1;SOS1;RAB5A
Arf6 signal transduction regulation	8/35	0.0274706	0.0812697	2.50066	8.98896	CYTH2;GNA14;GNA15;LHCGR;ADRB2;ADAP1;MET;EPHA2
Signal transduction by L1	8/35	0.0274706	0.0812697	2.50066	8.98896	ITGB1;RPS6KA3;MAP2K1;MAPK1;ITGAV;NCAM1;ITGA5;FGFR1
Atypical NF-kappaB pathway	5/17	0.0279096	0.081675	3.51452	12.5777	BCL3;REL;PIK3R1;NFKB1;RELA
Endocytotic role of NDK, phosphins and dynamin	5/17	0.0279096	0.081675	3.51452	12.5777	PPP3CC;SYNJ2;CALM1;NME1;PICALM
GRB2-SOS provides linkage to MAPK signaling for integrins	5/17	0.0279096	0.081675	3.51452	12.5777	VWF;GRB2;SOS1;CRK;BCAR1
Inflammasomes	5/17	0.0279096	0.081675	3.51452	12.5777	PANX1;BCL2;NLRP3;TXN;BCL2L1
Nitric oxide metabolism	5/17	0.0279096	0.081675	3.51452	12.5777	HSP90AA1;GCH1;NOS3;CALM1;PTS
Oocyte meiosis	19/113	0.0287492	0.0837961	1.70838	6.0633	MAP2K1;YWHAB;ITPR1;PPP2R5B;ADCY2;REC8;ANAPC11;PPP2CA;RPS6KA3;PPP2CB;PPP3CC;PPP2R1B;PLCZ1;ESPL1;CDK2;MAPK1;CALM1;YWHAG;YWHAH
Integrin beta-2 pathway	7/29	0.0288824	0.0837961	2.68485	9.5165	FCGR2A;PLAU;ICAM2;PLAUR;ICAM3;ICAM4;ICAM1
Reelin signaling pathway	7/29	0.0288824	0.0837961	2.68485	9.5165	ITGB1;GSK3B;MAP1B;FYN;PIK3R1;VLDLR;MAPT
Thyroid cancer	7/29	0.0288824	0.0837961	2.68485	9.5165	NRAS;MAP2K1;CCND1;TPM3;MYC;MAPK1;CTNNB1
Mitochondrial pathway of apoptosis: antiapoptotic Bcl-2 family	6/23	0.0293502	0.084971	2.97758	10.5062	MAPK10;NR4A1;MAPK1;MAPK6;BCL2L1;MCL1
Apoptotic factor-mediated response	3/7	0.0301059	0.0858716	6.323	22.1497	CASP9;CASP3;CYCS
BAD activation and translocation to mitochondria	3/7	0.0301059	0.0858716	6.323	22.1497	PPP3CC;YWHAB;BCL2
Endothelial NOS activation	3/7	0.0301059	0.0858716	6.323	22.1497	HSP90AA1;NOS3;CALM1
Inactivation of BCL-2 by BH3-only proteins	3/7	0.0301059	0.0858716	6.323	22.1497	BCL2;PMAIP1;BCL2L1
Internal ribosome entry pathway	3/7	0.0301059	0.0858716	6.323	22.1497	EIF4A1;EIF4G2;EIF4G1
MEK activation	3/7	0.0301059	0.0858716	6.323	22.1497	MAP2K1;NRAS;YWHAB
PP2A-mediated dephosphorylation of key metabolic factors	3/7	0.0301059	0.0858716	6.323	22.1497	PPP2CA;PPP2CB;PPP2R1B
Mitochondrial pathway of apoptosis: caspases	14/77	0.0308078	0.0875335	1.87703	6.53206	HSP90AA1;HSPA4;BCL10;HSPD1;CASP9;CASP3;MAPK1;CYCS;MAP3K7;PAK2;NAIP;HSPA1B;BIRC3;HSPA1A
Arf6 integrin-mediated signaling pathway	10/49	0.0308828	0.0875335	2.16462	7.5276	ITGB1;SPAG9;EDNRB;ITGA1;CTNNB1;ITGAV;ITGA5;ADRB2;KLC1;NME1
Muscle contraction	10/49	0.0308828	0.0875335	2.16462	7.5276	MYBPC3;MYL4;ITGB5;TPM3;ITGA1;DMD;SORBS1;CALM1;MYL9;VCL
Activation of chaperones by ATF6 alpha	4/12	0.0311794	0.0876488	4.21638	14.6224	XBP1;NFYA;ATF6;ATF4
Inhibition of replication initiation of damaged DNA by RB1/E2F1	4/12	0.0311794	0.0876488	4.21638	14.6224	PPP2CA;PPP2CB;TFDP1;PPP2R1B
Platelet endothelial cell adhesion molecule 1 (PECAM1) interactions	4/12	0.0311794	0.0876488	4.21638	14.6224	LYN;FYN;ITGAV;PTPN11
Long-term depression	13/70	0.0313124	0.0876488	1.92617	6.67174	LYN;GUCY1A2;MAP2K1;GNAI3;ITPR1;PLA2G4A;GNA13;PPP2CA;PPP2CB;NRAS;PPP2R1B;GNA12;MAPK1
NCAM signaling for neurite out-growth	13/70	0.0313124	0.0876488	1.92617	6.67174	MAP2K1;YWHAB;SPTA1;NRAS;COL4A1;ST8SIA4;MAPK1;FYN;NCAM1;GRB2;SOS1;SPTBN1;FGFR1
Signaling events mediated by HDAC class I	13/70	0.0313124	0.0876488	1.92617	6.67174	SMURF1;STAT3;NUP153;TNF;SMG5;RELA;NFKB1;TNFRSF1A;GATAD2A;SMAD7;MTA2;MXD1;RAN
Cytosolic DNA-sensing pathway	11/56	0.0314649	0.0878936	2.06389	7.13875	IL6;CHUK;CCL4L2;IL1B;POLR3D;POLR1C;IRF7;RIPK1;RELA;NFKB1;NFKBIB
Inflammatory response pathway	7/30	0.0343304	0.0955035	2.56797	8.65849	CD86;LAMA5;IL4R;IL5RA;TNFRSF1B;THBS1;TNFRSF1A
Interferon-beta enhancer pathway	7/30	0.0343304	0.0955035	2.56797	8.65849	ATF2;JUN;GTF2B;IRF1;IRF7;RELA;NFKB1
Non-coding RNA metabolism	10/50	0.0350603	0.0965707	2.11039	7.07125	POM121;SEH1L;NUP188;NCBP2;NUP50;DDX20;NUP88;NUP153;NUP98;SNRPB
Translation factors	10/50	0.0350603	0.0965707	2.11039	7.07125	EEF1B2;EIF4A1;EIF5;EIF3I;EIF3J;ETF1;EIF2S1;PAIP1;EIF1;EIF4G1
Type 2 diabetes mellitus	10/50	0.0350603	0.0965707	2.11039	7.07125	SOCS2;MAPK10;SOCS3;SOCS1;GK;MAPK1;PIK3R1;TNF;SOCS4;HK1
Type II interferon signaling (interferon-gamma)	10/50	0.0350603	0.0965707	2.11039	7.07125	SOCS3;SOCS1;STAT1;IL1B;IRF1;TAP1;IRF8;PTPN11;GBP1;ICAM1
Ubiquitin-mediated degradation of phosphorylated Cdc25A	12/64	0.0352306	0.0965707	1.94858	6.51965	NQO1;PSMD12;PSMA1;PSMD14;PSMC4;PSME3;PSME4;ODC1;UBC;CDK2;PSMD1;AZIN1
CBL signaling regulation	5/18	0.0353569	0.0965707	3.24399	10.8423	LYN;FYN;GRB2;PIK3R1;CRK
Pertussis toxin-insensitive CCR5 signaling in macrophage	5/18	0.0353569	0.0965707	3.24399	10.8423	JUN;CXCR4;CCL2;FOS;CALM1
Serotonin receptor 4/6/7 and NR3C signaling	5/18	0.0353569	0.0965707	3.24399	10.8423	ELK4;EGR1;MAP2K1;SRF;MAPKAPK2
Transcriptional activity regulation by PML	5/18	0.0353569	0.0965707	3.24399	10.8423	SP100;RARA;TNFRSF1B;TNF;TNFRSF1A
Nicotinate and nicotinamide metabolism	6/24	0.0357249	0.096988	2.812	9.36932	BST1;NNMT;PNP;NAMPT;NMNAT2;NT5C2
Plexin D1 signaling	6/24	0.0357249	0.096988	2.812	9.36932	ITGB1;SEMA4A;ITGA1;ITGAV;ITGA5;VEGFA
Signal transduction of S1P receptor	6/24	0.0357249	0.096988	2.812	9.36932	ASAH1;SPHK1;GNAI3;S1PR1;MAPK1;MAPK6
Fc epsilon receptor I signaling pathway	14/79	0.0374488	0.101464	1.81908	5.97527	MAP2K3;LYN;MAP2K1;CSF2;PLA2G4A;PIK3R1;TNF;MAPK10;NRAS;MAPK1;LCP2;FYN;GRB2;SOS1
Cyclin A-Cdk2-associated events at S phase entry	13/72	0.0384289	0.103601	1.86066	6.0638	CDKN1A;PSMD12;PSMD14;WEE1;CCND1;PSMA1;PSMC4;MYC;PSME3;PSME4;UBC;CDK2;PSMD1
Sphingolipid metabolism	13/72	0.0384289	0.103601	1.86066	6.0638	ASAH1;SGMS1;SPHK1;SGMS2;UGCG;NEU4;STS;VAPA;GLB1;SMPD1;NEU1;DEGS1;GLA
Carbohydrate metabolism	34/235	0.0384671	0.103601	1.43129	4.66308	B4GALT3;PRPS1;POM121;SEH1L;PFKFB3;SDC4;NUP188;HK1;PPP2CA;PPP2CB;PPP2R1B;CHSY1;HYAL2;GPC1;HAS1;CHST15;IDS;HAS2;NUP88;ST3GAL1;PGAM1;NUP153;GLB1;NUP50;B3GNT2;ALDOC;NUP98;ALDOB;CALM1;ALDOA;CD44;CHST2;CHST3;B4GALT5
Glioma	12/65	0.0391896	0.105337	1.91171	6.19269	CDKN1A;MAP2K1;NRAS;CCND1;SHC1;PDGFA;MAPK1;E2F3;GRB2;PIK3R1;SOS1;CALM1
Alpha-6 beta-4 integrin signaling pathway	7/31	0.0404188	0.108425	2.46083	7.89549	LAMA5;LAMB3;SHC1;MAPK1;PTPN11;PIK3R1;RHOA
Nuclear beta-catenin signaling and target gene transcription regulation	14/80	0.0411276	0.109601	1.79141	5.71654	TLE2;JUN;CXCL8;TLE1;YWHAB;KLF4;CCND2;CCND1;MDFIC;MYC;ID2;CTNNB1;YWHAG;YWHAH
Death receptor signaling	4/13	0.0413436	0.109601	3.74768	11.9395	TNFRSF10B;RIPK1;TNF;TNFRSF1A
Double stranded RNA-induced gene expression	4/13	0.0413436	0.109601	3.74768	11.9395	CHUK;EIF2S1;NFKB1;RELA
MAP kinase downregulation by phosphorylation of MEK1 by Cdk5/p35	4/13	0.0413436	0.109601	3.74768	11.9395	EGR1;MAP2K1;MAPK1;NGF
Platelet adhesion to exposed collagen	4/13	0.0413436	0.109601	3.74768	11.9395	ITGB1;LYN;VWF;FYN
Signal attenuation	4/13	0.0413436	0.109601	3.74768	11.9395	SHC1;GRB2;SOS1;CRK
Cellular response to hypoxia	6/25	0.0429238	0.113567	2.66385	8.38667	EGLN1;EPAS1;UBE2D3;UBC;HIF1A;VEGFA
Glycosphingolipid metabolism	8/38	0.0430345	0.113638	2.25021	7.07861	UGCG;ASAH1;NEU4;STS;GLB1;SMPD1;NEU1;GLA
Androgen receptor signaling, proteolysis, and transcription regulation	15/88	0.0433913	0.113965	1.73546	5.44501	GSK3B;CDKN1A;JUN;LIMK2;STAT3;RNF6;FOS;PIK3R1;RHOA;RELA;RHOB;CDC42;CCND1;CTNNB1;RAN
Endochondral ossification	12/66	0.0434504	0.113965	1.8762	5.88403	ADAMTS4;SCIN;TGFB1;ADAMTS1;PLAU;STAT1;FGF18;MGP;CALM1;SLC38A2;VEGFA;FGFR1
Phospholipid metabolism	30/205	0.0434506	0.113965	1.44989	4.54706	ASAH1;LPGAT1;SGMS1;PITPNB;PIK3R1;SGMS2;PIK3C2A;AGPAT3;AGPAT4;PGS1;UGCG;NEU4;STS;SMPD1;NEU1;PNPLA8;SPHK1;MBOAT7;PLA2G4A;SYNJ2;GPCPD1;PISD;INPP4A;VAPA;GLB1;ETNK1;PEMT;DEGS1;PI4KB;GLA
Calcineurin in effects in keratinocyte differentiation	5/19	0.043917	0.113965	3.01211	9.4142	CDKN1A;PPP3CC;NFATC2;NFATC1;CALM1
Cell cycle progression regulation by PLK3	5/19	0.043917	0.113965	3.01211	9.4142	CASP9;PLK3;CASP3;CYCS;YWHAH
MAL role in Rho-mediated activation of SRF	5/19	0.043917	0.113965	3.01211	9.4142	CDC42;MAP2K1;SRF;MAPK1;RHOA
Mitochondrial gene expression	5/19	0.043917	0.113965	3.01211	9.4142	MYEF2;MTERF3;TFB2M;GABPB1;PPRC1
Platelet calcium homeostasis	5/19	0.043917	0.113965	3.01211	9.4142	TRPC6;STIM1;ATP2B4;ITPR1;ATP2A2
Signaling by FGFR1 fusion mutants	5/19	0.043917	0.113965	3.01211	9.4142	BCR;STAT1;STAT3;GRB2;PIK3R1
Lysosphingolipid and lysophosphatidic acid (LPA) G-protein coupled receptors	3/8	0.0444295	0.114635	5.05811	15.7502	S1PR1;LPAR2;S1PR4
Nef-induced signal transduction	3/8	0.0444295	0.114635	5.05811	15.7502	ELMO1;FYN;PAK2
Oxygen/carbon dioxide exchange in erythrocytes	3/8	0.0444295	0.114635	5.05811	15.7502	CA1;HBB;SLC4A1
Lipid and lipoprotein metabolism	64/489	0.0454616	0.117075	1.27638	3.94515	ACADVL;ALAS1;LPGAT1;PITPNB;MED19;MSMO1;PIK3C2A;CYP46A1;MED13;STS;SCP2;SMPD1;ANKRD1;LBR;TEAD2;TEAD3;TEAD4;SPHK1;MED8;PLA2G4A;ACSL4;GPCPD1;MED26;PISD;INPP4A;CH25H;ACOX1;PLIN2;FAR2;ANGPTL4;IDI1;ASAH1;SGMS1;SAR1B;SGMS2;ABHD5;PIK3R1;AGPAT3;AGPAT4;HSD11B1;HELZ2;PGS1;CYP27B1;UGCG;NEU4;NEU1;SLC25A20;LDLR;WWTR1;GK;NFYA;PNPLA8;MBOAT7;TXNRD1;SYNJ2;GRHL1;SQLE;VAPA;GLB1;ETNK1;PEMT;DEGS1;PI4KB;GLA
Signaling by NOTCH	19/119	0.0457364	0.117558	1.60534	4.95224	NOTCH3;TLE2;JUN;TLE1;NOTCH1;FBXW7;ATP2A2;FURIN;HIF1A;HEYL;ADAM17;TFDP1;CCND1;AGO3;MYC;UBC;AGO2;E2F3;HES1
Seven transmembrane receptor signaling through beta-arrestin	13/74	0.0466209	0.119604	1.79946	5.5166	MAP2K3;MAP2K1;PDE4D;RHOA;NFKB1;NFKB2;PPP2CA;MAPK10;PDE12;PPP2R2B;PDE4B;MAPK1;MAPK6
Signaling by Robo receptor	7/32	0.0471685	0.12078	2.36227	7.21444	CDC42;GPC1;ABL1;ABL2;SOS1;PAK2;CAP2
G13 signaling pathway	8/39	0.0492962	0.12599	2.1775	6.55408	CDC42;GNA13;MAPK10;ARHGDIG;WAS;ARHGEF1;CALM1;RHOA
Selective expression of chemokine receptors during T-cell polarization	6/26	0.0509687	0.130018	2.53051	7.53219	CSF2;IL4R;TGFB1;CCL3;CXCR4;CCR7
Arrhythmogenic right ventricular cardiomyopathy (ARVC)	13/75	0.0511398	0.130209	1.77033	5.26354	ITGB1;ITGB5;CACNA2D1;ITGA1;ATP2A2;ACTN4;GJA1;SGCB;LMNA;CTNNB1;ITGAV;DMD;ITGA5
AKT phosphorylation of cytosolic targets	4/14	0.0531562	0.134081	3.37272	9.89733	CASP9;GSK3B;CDKN1A;CHUK
Complement cascade regulation	4/14	0.0531562	0.134081	3.37272	9.89733	C4A;CFH;CD46;CD55
Hyaluronan metabolism	4/14	0.0531562	0.134081	3.37272	9.89733	HAS1;HYAL2;HAS2;CD44
Initiation of the second proteolytic cleavage of Notch receptor by receptor-ligand binding	4/14	0.0531562	0.134081	3.37272	9.89733	NOTCH3;ADAM17;NOTCH1;UBC
Porphyrin metabolism	4/14	0.0531562	0.134081	3.37272	9.89733	ALAS2;ALAS1;HMBS;HMOX1
Cell differentiation pathway	5/20	0.0536105	0.134474	2.81114	8.22543	SRF;ID2;STAT3;KLF4;EZH2
GATA3-mediated activation of Th2 cytokine expression	5/20	0.0536105	0.134474	2.81114	8.22543	MAP2K3;IL1A;NFATC2;NFATC1;JUNB
Signaling by Hippo	5/20	0.0536105	0.134474	2.81114	8.22543	WWTR1;LATS2;YWHAB;CASP3;TJP2
Diabetes pathways	21/137	0.0540329	0.135282	1.52966	4.46381	XBP1;ACADVL;CXCL8;NFYA;SHC1;GOSR2;PPP2R5B;KLF4;EIF2S1;ERN1;KIF5B;MYC;LEP;LMNA;CCL2;DNAJB9;EXOSC3;ATF6;ATF3;CD44;ATF4
Endocytosis	29/201	0.0541333	0.135283	1.42557	4.1574	RAB5C;CXCR4;CBLB;ADRB2;EEA1;CDC42;RAB11FIP1;PARD6A;CXCR1;CHMP1B;CXCR2;DNM1L;LDLR;SH3GLB1;HSPA8;TGFB1;SMURF1;VPS37C;VPS37B;RHOA;SMAD7;EHD1;EHD4;NEDD4;FOLR3;RAB5A;MET;HSPA1B;HSPA1A
Glycoprotein VI-mediated activation cascade	7/33	0.0545954	0.136186	2.27128	6.60445	CDC42;LYN;FYN;LCP2;PIK3R1;RHOA;RHOB
Neural crest differentiation	15/91	0.055742	0.13879	1.66668	4.81173	ITGB1;GSK3B;NOTCH3;NOTCH1;ETS1;NFKB1;CDH7;RHOB;NFKB2;MYC;SNAI1;CTNNB1;HES1;MSX1;FGFR1
RIG-I/MDA5-mediated induction of interferon-alpha/beta pathways	13/76	0.0559498	0.139052	1.74213	5.0231	CHUK;UBE2D3;TNFAIP3;RELA;NFKB1;NFKB2;IRF1;UBC;IRF7;SAA1;S100A12;RIPK1;NFKBIB
Agrin in postsynaptic differentiation	9/47	0.0563174	0.139198	1.99859	5.74946	ITGB1;CDC42;LAMA5;JUN;LAMB3;ITGA1;MAPK1;DMD;PAK2
Delta Np63 pathway	9/47	0.0563174	0.139198	1.99859	5.74946	GSK3B;IL1A;NOTCH1;CEBPD;RRAD;FBXW7;BDKRB2;HES1;FOSL2
Regulation of transcription by NOTCH1 intracellular domain	9/47	0.0563174	0.139198	1.99859	5.74946	HEYL;TLE2;NOTCH1;TLE1;FBXW7;MYC;UBC;HES1;HIF1A
Granule cell survival pathway	16/99	0.0573922	0.141595	1.62799	4.65254	MAP2K3;GSK3B;MAP2K1;JUN;ADCY2;FOS;CXCL2;CASP9;PLCZ1;CASP3;SMPD1;CXCR2;BCL2;CYCS;MAPT;CREB5
Capped intron-containing pre-mRNA processing	21/138	0.0576212	0.141901	1.5165	4.3279	POM121;CPSF7;SEH1L;NUP188;DHX9;NCBP2;ALYREF;NUP153;HNRNPM;PTBP1;NXF1;HNRNPF;NUP50;POLR2D;SRSF2;CSTF1;SRSF4;NUP88;NUP98;SNRPB;POLR2L
BAD phosphorylation regulation	6/27	0.0598734	0.146913	2.40988	6.78507	IL3RA;BCL2;MAPK1;PIK3R1;YWHAH;BCL2L1
Insulin regulation of blood glucose	6/27	0.0598734	0.146913	2.40988	6.78507	GSK3B;YWHAB;LNPEP;YWHAG;RHOQ;YWHAH
Alpha-4 beta-7 integrin signaling	3/9	0.0615024	0.14875	4.21486	11.7539	ITGB1;CD44;RHOA
Elevation of cytosolic calcium levels	3/9	0.0615024	0.14875	4.21486	11.7539	TRPC6;STIM1;ITPR1
Gene expression regulation by hypoxia-inducible factor	3/9	0.0615024	0.14875	4.21486	11.7539	EPAS1;HIF1A;VEGFA
Heme biosynthesis	3/9	0.0615024	0.14875	4.21486	11.7539	ALAS2;ALAS1;HMBS
MAP kinase pathway regulation through dual specificity phosphatases	3/9	0.0615024	0.14875	4.21486	11.7539	DUSP2;DUSP1;DUSP6
Prostanoid ligand receptors	3/9	0.0615024	0.14875	4.21486	11.7539	PTGER4;TBXA2R;PTGER2
Pyrimidine salvage reactions	3/9	0.0615024	0.14875	4.21486	11.7539	CDA;UCK2;UPP1
West Nile virus infection	3/9	0.0615024	0.14875	4.21486	11.7539	CASP9;CASP3;CYCS
Dilated cardiomyopathy	16/100	0.0618828	0.149403	1.60852	4.47572	ITGB1;MYBPC3;TGFB1;ITGB5;TPM3;CACNA2D1;ITGA1;ATP2A2;ADCY2;TNF;IL6;SGCB;LMNA;ITGAV;DMD;ITGA5
CDC42 signaling events	12/70	0.0636762	0.153185	1.74642	4.80954	MAP2K3;CDC42;ATF2;GSK3B;JUN;PARD6A;LIMK2;MAPK1;CTNNB1;PIK3R1;PAK2;BCAR1
Nucleotide metabolism	12/70	0.0636762	0.153185	1.74642	4.80954	CDA;UCK2;PNP;GPX1;TXNRD1;GLRX;UPP1;HPRT1;TXN;NT5C2;GART;NME1
CD28-dependent PI3K/Akt signaling	5/21	0.0644429	0.15448	2.6353	7.22592	CD86;MAPKAP1;FYN;MAP3K8;PIK3R1
p38 MK2 pathway	5/21	0.0644429	0.15448	2.6353	7.22592	YWHAB;SRF;MAPKAPK2;YWHAG;YWHAH
Proteasome degradation	11/63	0.0661778	0.157434	1.78536	4.84798	UCHL1;PSMD12;PSMA1;PSMC4;PSME3;NEDD4;UBE2D3;UBC;PSMD1;UBA1;UCHL3
Apoptosis regulation	13/78	0.0664659	0.157434	1.68834	4.57721	CDKN1A;PSMD12;PSMD14;CASP9;PSMA1;PSMC4;CASP3;PSME3;PSME4;UBC;CDK2;PSMD1;PAK2
Arf6 vesicle-mediated transport	4/15	0.0665964	0.157434	3.06594	8.30595	PLAUR;MAPK1;RHOA;NME1
Eicosanoid ligand-binding G-protein coupled receptors	4/15	0.0665964	0.157434	3.06594	8.30595	PTGER4;CYSLTR1;TBXA2R;PTGER2
Glycosaminoglycan biosynthesis: keratan sulfate	4/15	0.0665964	0.157434	3.06594	8.30595	B4GALT3;B3GNT2;ST3GAL1;CHST2
Repression of pain sensation by the transcriptional regulator DREAM	4/15	0.0665964	0.157434	3.06594	8.30595	RPS6KA3;JUN;KCNIP3;FOS
Sema3A/PAK-dependent axon repulsion	4/15	0.0665964	0.157434	3.06594	8.30595	HSP90AA1;FES;FYN;PAK2
GnRH signaling pathway	16/101	0.0666065	0.157434	1.5895	4.30589	MAP2K3;MAP2K1;JUN;ITPR1;PLA2G4A;ADCY2;CDC42;MAPK10;NRAS;GNRH2;MAPK1;GRB2;CALM1;SOS1;ATF4;HBEGF
Hexose transport	8/42	0.0714842	0.168374	1.98504	5.23708	POM121;SEH1L;NUP188;NUP50;NUP88;NUP153;NUP98;HK1
Netrin-1 signaling	8/42	0.0714842	0.168374	1.98504	5.23708	CDC42;TRPC6;PITPNA;FYN;PTPN11;PRKCQ;RGMB;EZR
Pre-NOTCH expression and processing	10/57	0.0754822	0.177482	1.79537	4.63898	NOTCH3;JUN;TFDP1;NOTCH1;CCND1;AGO3;AGO2;ATP2A2;FURIN;E2F3
Cell cycle	58/453	0.0758659	0.178074	1.24309	3.20566	GSK3B;CDKN1A;AHCTF1;YWHAB;LMNB1;ACTR1A;CCND3;CCND2;PPP2R1B;CCND1;MYC;PSMD1;YWHAG;NDEL1;YWHAH;HSP90AA1;DYRK1A;UBE2E1;PPP2R5B;CSNK1D;DYNLL1;CLIP1;TFDP1;PSMA1;ESPL1;PSME3;PSME4;NUP98;MAPRE1;PSMD12;SEH1L;PSMD14;MIS12;NSL1;ANAPC11;PPP2CA;PPP2CB;LMNA;UBC;ABL1;E2F3;E2F6;CDKN2D;CDKN2B;CDK11A;TGFB1;GADD45B;ODF2;GADD45A;CDC7;TUBB4B;CDK11B;REC8;WEE1;PSMC4;CDK2;CENPN;B9D2
HIF-1 degradation in normoxia	14/88	0.0800089	0.186889	1.59703	4.03349	HSP90AA1;PSMD12;PSMD14;TXN;HIF1A;MAPK10;PSMA1;PSMC4;PSME3;PSME4;PSMD1;MAPK1;PSMG1;MAPK6
Cell differentiation by G alpha (i/o) pathway inferred from mouse Neuro2A model	8/43	0.080036	0.186889	1.92821	4.86928	MAP2K3;ASAH1;NRAS;MAP2K1;STAT3;MAPK1;RALGDS;CRK
Cleavage of growing transcript in the termination region	8/43	0.080036	0.186889	1.92821	4.86928	LSM10;CPSF7;NCBP2;ALYREF;CSTF1;SRSF2;SRSF4;SNRPB
Skeletal myogenesis control by HDAC and calcium/calmodulin-dependent kinase (CaMK)	6/29	0.080277	0.187024	2.20008	5.5492	PPP3CC;NFATC2;NFATC1;PIK3R1;CALM1;YWHAH
Glycogen metabolism	7/36	0.0810269	0.187024	2.03598	5.11637	PPP2CA;GSK3B;PPP2CB;PPP2R1B;PPP2R2B;PPP2R5B;CALM1
Deregulation of CDK5 in Alzheimer's disease	3/10	0.0811255	0.187024	3.61253	9.07381	PPP2CA;GSK3B;MAPT
IKK complex recruitment mediated by RIP1	3/10	0.0811255	0.187024	3.61253	9.07381	CHUK;RIPK1;TICAM1
IRAK2-mediated activation of TAK1 complex	3/10	0.0811255	0.187024	3.61253	9.07381	IRAK2;UBC;MAP3K7
Interferon-alpha signaling pathway	3/10	0.0811255	0.187024	3.61253	9.07381	IFNAR2;STAT1;IFNAR1
Purine catabolism	3/10	0.0811255	0.187024	3.61253	9.07381	GPX1;PNP;NT5C2
Inhibition of platelet activation by aspirin	4/16	0.0816154	0.187024	2.81029	7.04184	ITGB1;MAP2K1;PLA2G4A;MAPK1
PI3K subunit p85 role in regulation of actin organization and cell migration	4/16	0.0816154	0.187024	2.81029	7.04184	CDC42;PDGFA;PIK3R1;RHOA
Rb tumor suppressor/checkpoint signaling in response to DNA damage	4/16	0.0816154	0.187024	2.81029	7.04184	CDKN1A;WEE1;CDK2;YWHAH
Selenium metabolism and selenoproteins	4/16	0.0816154	0.187024	2.81029	7.04184	JUN;FOS;NFKB1;RELA
Lipid metabolism regulation by peroxisome proliferator-activated receptor alpha (PPAR-alpha)	17/112	0.0827695	0.189347	1.51094	3.76481	TEAD4;WWTR1;ALAS1;NFYA;TXNRD1;MED8;MED19;GRHL1;MED26;HELZ2;MED13;ACOX1;ANKRD1;PLIN2;ANGPTL4;TEAD2;TEAD3
Type I interferon (interferon-alpha/beta) pathway	9/51	0.0862811	0.197047	1.80785	4.42948	PTPN1;PTPRE;PTP4A3;PTPRB;STAT1;PTPN21;PTPN11;PTPN12;IFNAR1
Angiogenesis	5/23	0.0894765	0.201764	2.34223	5.65361	ANGPT1;NOS3;MAPK1;HIF1A;VEGFA
Blood clotting cascade	5/23	0.0894765	0.201764	2.34223	5.65361	SERPINB2;VWF;PLAU;SERPINE1;F5
Deadenylation of mRNA	5/23	0.0894765	0.201764	2.34223	5.65361	CNOT4;EIF4A1;EIF4A3;EIF4G1;PAIP1
Downregulation of SMAD2/3-SMAD4 transcriptional activity	5/23	0.0894765	0.201764	2.34223	5.65361	TGIF1;SKI;UBE2D3;UBC;TRIM33
Mitochondrial fatty acid beta-oxidation	5/23	0.0894765	0.201764	2.34223	5.65361	ACADVL;SCP2;EHHADH;ACSL4;SLC25A20
Post-elongation processing of intronless pre-mRNA	5/23	0.0894765	0.201764	2.34223	5.65361	LSM10;CPSF7;NCBP2;CSTF1;SNRPB
Signaling by bone morphogenetic protein (BMP)	5/23	0.0894765	0.201764	2.34223	5.65361	SKI;BMP2;SMURF1;UBE2D3;SMAD7
Activation of NOXA and translocation to mitochondria	2/5	0.090585	0.201764	5.6181	13.4917	TFDP1;PMAIP1
ERK activation	2/5	0.090585	0.201764	5.6181	13.4917	MAP2K1;MAPK1
Electric transmission across gap junctions	2/5	0.090585	0.201764	5.6181	13.4917	PANX1;PANX2
FOSB gene expression and drug abuse	2/5	0.090585	0.201764	5.6181	13.4917	JUND;FOSB
G2 phase pathway	2/5	0.090585	0.201764	5.6181	13.4917	CDK2;E2F3
Neurophilin interactions with VEGF and VEGF receptor	2/5	0.090585	0.201764	5.6181	13.4917	NRP2;VEGFA
Nifedipine activity	2/5	0.090585	0.201764	5.6181	13.4917	MAP2K1;MAPK1
UDP-N-acetyl-glucosamine biosynthesis	2/5	0.090585	0.201764	5.6181	13.4917	GFPT2;UAP1
Latent infection of Homo sapiens with Mycobacterium tuberculosis	7/37	0.0912249	0.202855	1.96801	4.71225	ATP6V1G2;NCF1;NOS3;SLC11A1;NCF4;ATP6V0A4;CAMP
Nectin adhesion pathway	6/30	0.0917636	0.203718	2.10829	5.03573	CDC42;CTNNB1;ITGAV;PIK3R1;PVR;CRK
G alpha 13 pathway	11/67	0.0941756	0.20873	1.65746	3.9159	CDC42;ARHGEF15;TBXA2R;SRF;BCL2;ARHGEF1;PRKCQ;RHOA;NFKB1;SLC9B2;NFKB2
Apoptotic execution phase	9/52	0.0950134	0.210242	1.7657	4.156	CASP3;LMNA;CTNNB1;PRKCQ;MAPT;DNM1L;PAK2;LMNB1;TJP2
ACE inhibitor pathway	4/17	0.0981403	0.21505	2.59397	6.02152	TGFB1;NOS3;BDKRB2;BDKRB1
Cell to cell adhesion signaling	4/17	0.0981403	0.21505	2.59397	6.02152	CTNNB1;PTPN11;BCAR1;VCL
HIV-1 elongation complex formation in the absence of HIV-1 Tat	4/17	0.0981403	0.21505	2.59397	6.02152	CDK9;CCNT1;ELL;NCBP2
Integrin beta-5 pathway	4/17	0.0981403	0.21505	2.59397	6.02152	ITGB5;PLAU;PLAUR;ITGAV
Post-chaperonin tubulin folding pathway	4/17	0.0981403	0.21505	2.59397	6.02152	TUBB6;TUBB2A;TUBB3;TUBB4B
TAK1-mediated activation of p38 MAPK	4/17	0.0981403	0.21505	2.59397	6.02152	MAP2K3;IRAK2;MAPKAPK2;MAP3K7
G alpha (z) signaling events	8/45	0.0988771	0.215964	1.82378	4.22001	RGS4;GNG10;GNG2;GNG5;GNAI3;ADCY2;PRKCQ;ADRA2A
Interleukin-12/STAT4 pathway	8/45	0.0988771	0.215964	1.82378	4.22001	CD86;JUN;IL18RAP;TGFB1;IRF1;STAT3;FOS;PIAS2
GPCR ligand binding	52/410	0.100167	0.218429	1.22871	2.82716	CXCL8;WNT2B;ADM;CXCL1;CXCL2;CX3CL1;CXCL5;GPR132;CYSLTR1;EDNRB;BDKRB2;PROK2;BDKRB1;CCR7;FFAR2;LHCGR;ANXA1;GPBAR1;ADRA2A;PTGER4;NPB;PTGER2;PTAFR;C5AR1;FPR1;LPAR2;CXCR4;FPR2;ADRB2;HCAR2;HCAR3;GNG10;GNG2;CXCR1;GNG5;TBXA2R;P2RY2;CXCR2;CCL3;S1PR1;CCL2;TAC1;S1PR4;CD55;P2RY13;FZD5;CCL20;GPR4;PPBP;GNRH2;SAA1;ACKR1
Apoptotic cleavage of cell adhesion proteins	3/11	0.103053	0.220804	3.16079	7.18293	CASP3;CTNNB1;TJP2
E2F1 destruction pathway	3/11	0.103053	0.220804	3.16079	7.18293	TFDP1;FBXW7;CDK2
Mechanism of protein import into the nucleus	3/11	0.103053	0.220804	3.16079	7.18293	NUP153;KPNA2;RAN
Methylation	3/11	0.103053	0.220804	3.16079	7.18293	NNMT;MAT2A;COMT
Regulated proteolysis of p75 neurotrophin receptor	3/11	0.103053	0.220804	3.16079	7.18293	ADAM17;NFKB1;RELA
SLBP-dependent processing of replication-dependent histone pre-mRNAs	3/11	0.103053	0.220804	3.16079	7.18293	LSM10;NCBP2;SNRPB
Signaling by VEGF	3/11	0.103053	0.220804	3.16079	7.18293	NRP2;VEGFC;VEGFA
Signaling by activated point mutants of FGFR1	3/11	0.103053	0.220804	3.16079	7.18293	FGF5;FGF1;FGFR1
Transport of organic anions	3/11	0.103053	0.220804	3.16079	7.18293	SLCO3A1;SLCO4A1;SLCO2A1
eIF2 regulation	3/11	0.103053	0.220804	3.16079	7.18293	GSK3B;EIF5;EIF2S1
p38 gamma/delta MAPK pathway	3/11	0.103053	0.220804	3.16079	7.18293	MAP2K3;CCND1;MAPT
Proteasome complex	5/24	0.103622	0.221672	2.21883	5.0301	PSMD12;PSMD14;PSMA1;UBA1;UBE2A
Keratan sulfate/keratin metabolism	6/31	0.104086	0.222314	2.02385	4.57902	B4GALT3;GLB1;B3GNT2;ST3GAL1;CHST2;B4GALT5
ECM-receptor interaction	13/84	0.105445	0.22486	1.54514	3.47591	ITGB1;LAMA5;ITGB5;VWF;SDC4;LAMB3;ITGA1;TNC;THBS1;COL4A1;ITGAV;ITGA5;CD44
Syndecan 1 pathway	8/46	0.109156	0.232408	1.77569	3.93311	LAMA5;SDCBP;COL15A1;TGFB1;COL4A1;COL12A1;MAPK1;MET
Tight junction	19/133	0.110712	0.235351	1.40708	3.09673	GNAI3;RRAS2;ACTN4;YBX3;RHOA;CDC42;PPP2CA;PPP2CB;NRAS;MRAS;PARD6A;PPP2R1B;CLDN15;VAPA;PPP2R2B;CTNNB1;PRKCQ;MYL9;TJP2
RNA polymerase II transcription	15/101	0.11343	0.240749	1.47205	3.20402	CPSF7;CCNT1;ELL;NCBP2;TAF13;GTF2B;ALYREF;LSM10;CDK9;POLR2D;SRSF2;CSTF1;SRSF4;SNRPB;POLR2L
E-cadherin nascent AJ-like junctions pathway	7/39	0.113659	0.240857	1.8448	4.01161	CDC42;CCND1;CTNNB1;PIK3R1;CRK;RHOA;NME1
Nucleotide di- and triphosphate biosynthesis and interconversion	4/18	0.116078	0.245028	2.40855	5.18678	TXNRD1;GLRX;TXN;NME1
Pre-NOTCH processing in Golgi	4/18	0.116078	0.245028	2.40855	5.18678	NOTCH3;NOTCH1;ATP2A2;FURIN
Peptide G-protein coupled receptors	26/192	0.116171	0.245028	1.32285	2.84769	NPB;CXCL8;C5AR1;FPR1;CXCR4;CXCL1;FPR2;CXCL2;CX3CL1;CXCL5;EDNRB;CXCR1;CXCR2;BDKRB2;CCL3;PROK2;BDKRB1;CCL2;CCR7;TAC1;LHCGR;ANXA1;CCL20;PPBP;SAA1;ACKR1
Circadian rhythm	10/62	0.117162	0.246733	1.62228	3.4785	HELZ2;PER2;ATF2;SERPINE1;NAMPT;UBC;BHLHE40;CRY1;CSNK1D;HIF1A
C-Myc pathway	5/25	0.118796	0.248626	2.10777	4.49027	PPP2CA;GSK3B;FBXW7;MYC;PAK2
IGF1 receptor signaling through beta-arrestin	5/25	0.118796	0.248626	2.10777	4.49027	PPP2CA;MAPK10;PPP2R2B;MAPK1;MAPK6
Metal ion solute carrier family (SLC) transporters	5/25	0.118796	0.248626	2.10777	4.49027	SLC41A2;SLC11A1;SLC41A1;SLC30A1;SLC39A14
Regulatory RNA pathways	5/25	0.118796	0.248626	2.10777	4.49027	AGO3;POLR2D;AGO2;RAN;POLR2L
G alpha q pathway	11/70	0.119213	0.249112	1.57292	3.34535	RGS4;RGS18;RGS2;RGS1;RGS16;ITPR1;PRKCQ;RGS11;NFKB1;SLC9B2;NFKB2
Actions of nitric oxide in the heart	8/47	0.119995	0.249992	1.73006	3.66826	GUCY1A2;HSP90AA1;NOS3;BDKRB2;PIK3R1;CALM1;SLC7A1;VEGFA
Glycosaminoglycan metabolism	16/110	0.120003	0.249992	1.43659	3.04591	B4GALT3;SDC4;CHSY1;GLB1;HYAL2;GPC1;HAS1;CHST15;IDS;B3GNT2;HAS2;ST3GAL1;CD44;CHST2;B4GALT5;CHST3
Phosphatidylinositol signaling system	12/78	0.120404	0.250441	1.53404	3.24741	INPP4A;IPPK;PLCZ1;INPP1;ITPK1;ITPR1;PIK3R1;SYNJ2;PI4KB;PIK3C2A;CALM1;DGKH
TAp63 pathway	9/55	0.12415	0.257064	1.65027	3.4429	NQO1;CDKN1A;CHUK;TRAF4;GADD45A;ABL1;PMAIP1;AEN;NOC2L
ADP signalling through P2Y purinoceptor 1	2/6	0.126547	0.257064	4.21334	8.70958	GNG2;PLA2G4A
Activation of TRKA receptors	2/6	0.126547	0.257064	4.21334	8.70958	NTRK2;NGF
Cytochrome P450 metabolism of vitamins	2/6	0.126547	0.257064	4.21334	8.70958	CYP26A1;CYP27B1
Fas signaling pathway in hepatocytes	2/6	0.126547	0.257064	4.21334	8.70958	NCF1;SMPD1
G beta-gamma signaling through PI3K gamma	2/6	0.126547	0.257064	4.21334	8.70958	GNG2;RHOA
NADE-dependent death signaling	2/6	0.126547	0.257064	4.21334	8.70958	CASP3;NGF
PIK3C1/B pathway	2/6	0.126547	0.257064	4.21334	8.70958	MAP2K1;MAPK1
Pre-NOTCH Processing in the endoplasmic reticulum	2/6	0.126547	0.257064	4.21334	8.70958	NOTCH3;NOTCH1
RSK activation	2/6	0.126547	0.257064	4.21334	8.70958	RPS6KA3;MAPK1
Signaling by EGFR	2/6	0.126547	0.257064	4.21334	8.70958	GRB2;SOS1
Small interfering RNA (siRNA) biogenesis	2/6	0.126547	0.257064	4.21334	8.70958	AGO3;AGO2
Assembly of HIV virion	3/12	0.127011	0.257064	2.80943	5.79722	UBC;VPS37C;VPS37B
BMP signaling and regulation	3/12	0.127011	0.257064	2.80943	5.79722	BMP2;SMURF1;TOB1
D4-GDI signaling pathway	3/12	0.127011	0.257064	2.80943	5.79722	CASP9;JUN;CASP3
FGFR3 ligand binding and activation	3/12	0.127011	0.257064	2.80943	5.79722	FGF5;FGF18;FGF1
Parkin role in the ubiquitin-proteasomal pathway	3/12	0.127011	0.257064	2.80943	5.79722	UBE2G1;SNCA;UBE2L3
SRF and microRNAs in smooth muscle differentiation and proliferation	3/12	0.127011	0.257064	2.80943	5.79722	CCND2;SRF;KLF4
Mitochondrial pathway of apoptosis: multidomain Bcl-2 family	11/71	0.128315	0.258929	1.54661	3.17561	DNAJA1;STS;HSPA4;UBC;ITPR1;BCL2;PRKCQ;CRYAB;HSPA1B;BCL2L1;HSPA1A
RIG-I-like receptor signaling pathway	11/71	0.128315	0.258929	1.54661	3.17561	MAPK10;CXCL8;DDX3X;CHUK;IRF7;RIPK1;TNF;MAP3K7;RELA;NFKB1;NFKBIB
Mitotic G2-G2/M phases	13/87	0.129161	0.260248	1.48225	3.03372	HSP90AA1;CDK11A;ODF2;CSNK1D;DYNLL1;TUBB4B;CDK11B;ACTR1A;WEE1;CDK2;E2F3;MAPRE1;YWHAG
Ubiquitin-mediated proteolysis	19/136	0.129689	0.260921	1.37077	2.79996	UBE2H;UBE2D4;FBXW7;UBA6;SMURF1;UBE2D3;UBE2E1;CBLB;UBE2G1;UBE2A;MID1;PIAS2;UBE2L3;ANAPC11;SOCS3;SOCS1;NEDD4;UBA1;BIRC3
ATM pathway	8/48	0.13138	0.26315	1.68671	3.42346	CDKN1A;JUN;YWHAB;GADD45A;ABL1;RBBP8;RELA;NFKB1
Activation of chaperones by IRE1 alpha	8/48	0.13138	0.26315	1.68671	3.42346	ERN1;ACADVL;XBP1;SHC1;GOSR2;LMNA;PPP2R5B;DNAJB9
HES/HEY pathway	8/48	0.13138	0.26315	1.68671	3.42346	RCAN1;NOTCH1;TLE1;BGLAP;STAT3;RBBP8;HES1;HIF1A
Integrin family cell surface interactions	5/26	0.134946	0.267869	2.00728	4.02036	ITGB1;ITGB5;ITGA1;ITGAV;ITGA5
Segmentation clock	5/26	0.134946	0.267869	2.00728	4.02036	GSK3B;ADAM17;NOTCH1;CTNNB1;HES1
YAP1- and WWTR1 (TAZ)-stimulated gene expression	5/26	0.134946	0.267869	2.00728	4.02036	HELZ2;TEAD4;WWTR1;TEAD2;TEAD3
Eicosanoid biosynthesis	4/19	0.135321	0.267869	2.24785	4.49594	PNPLA8;ALOX5;ALOX5AP;PTGS2
Lissencephaly gene (LIS1) in neuronal migration and development	4/19	0.135321	0.267869	2.24785	4.49594	CLIP1;ABL1;DYNLL1;NDEL1
STAT3 pathway	4/19	0.135321	0.267869	2.24785	4.49594	IL6;STAT3;MAPK1;IL6R
Signaling by NODAL	4/19	0.135321	0.267869	2.24785	4.49594	FOXH1;FURIN;ACVR1B;FOXO3
Telomeres, telomerase, cellular aging, and immortality	4/19	0.135321	0.267869	2.24785	4.49594	PPP2CA;HSP90AA1;MYC;BCL2
Angiotensin II-stimulated signaling through G-proteins and beta-arrestin	10/64	0.136815	0.270267	1.56202	3.10706	MAP2K3;MAPK10;EGR1;MAP2K1;PLCZ1;ITPR1;MAPK1;PRKCQ;MAPK6;RHOA
M phase pathway	14/96	0.136932	0.270267	1.44057	2.86425	AHCTF1;SEH1L;MIS12;PPP2R5B;NSL1;PPP2CA;PPP2CB;CLIP1;PPP2R1B;CENPN;NUP98;B9D2;MAPRE1;NDEL1
Cell-cell communication	18/129	0.138436	0.272837	1.36863	2.70626	ITGB1;CD151;LAMB3;CADM2;PTPN11;ACTN4;PIK3R1;PVR;SIRPB1;CDH7;PARD6A;CLDN15;CDH13;CTNNB1;GRB2;FYN;SPTBN1;LIMS1
G alpha 12 pathway	8/49	0.143297	0.282004	1.64548	3.19691	MAP2K3;MAPK10;MAP2K1;NRAS;JUN;MAPK1;MAPK6;RHOA
Fructose and mannose metabolism	6/34	0.145801	0.2861	1.8067	3.47882	PFKFB3;PMM2;ALDOC;ALDOB;ALDOA;HK1
HIF-2-alpha transcription factor network	6/34	0.145801	0.2861	1.8067	3.47882	EGLN1;EPAS1;SERPINE1;BHLHE40;ETS1;VEGFA
Antigen processing and presentation	12/81	0.147311	0.288644	1.4671	2.8098	HSPA8;HSP90AA1;NFYA;CTSL;HSPA4;PSME3;RFX5;TAP2;TAP1;TNF;HSPA1B;HSPA1A
CTCF pathway	5/27	0.152007	0.29495	1.91594	3.60929	PPP2CA;BCR;TGFB1;MYC;PIK3R1
Cell cycle: G2/M checkpoint	5/27	0.152007	0.29495	1.91594	3.60929	CDKN2D;CDKN1A;WEE1;GADD45A;YWHAH
Fatty acid, triacylglycerol, and ketone body metabolism	23/173	0.152598	0.29495	1.29435	2.43331	TEAD4;WWTR1;ACADVL;ALAS1;GK;NFYA;TXNRD1;MED8;MED19;ACSL4;GRHL1;MED26;AGPAT3;AGPAT4;HELZ2;MED13;ACOX1;ANKRD1;PLIN2;ANGPTL4;SLC25A20;TEAD2;TEAD3
Advanced glycosylation endproduct receptor signaling	3/13	0.152711	0.29495	2.52835	4.75129	SAA1;MAPK1;S100A12
CBL-mediated ligand-induced downregulation of EGF receptors	3/13	0.152711	0.29495	2.52835	4.75129	SH3GLB1;GRB2;MET
Interleukin-22 soluble receptor signaling pathway	3/13	0.152711	0.29495	2.52835	4.75129	SOCS3;STAT1;STAT3
Melanocyte development and pigmentation pathway	3/13	0.152711	0.29495	2.52835	4.75129	MAP2K1;BCL2;MAPK1
Organic cation/anion/zwitterion transport	3/13	0.152711	0.29495	2.52835	4.75129	SLC22A4;SLC22A12;SLC22A5
Signal regulatory protein (SIRP) family interactions	3/13	0.152711	0.29495	2.52835	4.75129	PTPN11;GRB2;SIRPB1
TACI and BCMA stimulation of B cell immune responses	3/13	0.152711	0.29495	2.52835	4.75129	CHUK;NFKB1;RELA
Rho GTPase cycle	17/123	0.155653	0.299535	1.35331	2.51732	ARHGAP9;STARD13;PLEKHG2;STARD8;ARHGDIG;RHOH;RHOC;RHOA;RHOB;BCR;CDC42;AKAP13;FGD4;TAGAP;RHOJ;SOS1;RHOQ
Heparan sulfate/heparin glycosaminoglycan (HS-GAG) degradation	4/20	0.155749	0.299535	2.10724	3.91844	SDC4;GLB1;GPC1;IDS
Skeletal muscle hypertrophy is regulated via AKT/mTOR pathway	4/20	0.155749	0.299535	2.10724	3.91844	PPP2CA;GSK3B;PIK3R1;EIF2S1
Autodegradation of Cdh1 by Cdh1-APC/C	9/58	0.157512	0.302494	1.54897	2.8629	PSMD12;PSMA1;PSMD14;PSMC4;PSME3;CDK2;UBE2E1;PSMD1;ANAPC11
MEF2D role in T cell apoptosis	6/35	0.161169	0.30908	1.7443	3.18387	NR4A1;PPP3CC;NFATC2;FYN;NFATC1;CALM1
Activation of PKC through G-protein coupled receptors	2/7	0.165123	0.312233	3.37049	6.07045	NFKB1;RELA
Attachment of GPI anchor to uPAR	2/7	0.165123	0.312233	3.37049	6.07045	PIGK;PLAUR
CREB phosphorylation	2/7	0.165123	0.312233	3.37049	6.07045	RPS6KA3;MAPKAPK2
FGFR3b ligand binding and activation	2/7	0.165123	0.312233	3.37049	6.07045	FGF18;FGF1
FYVE-finger proteins in vesicle transport	2/7	0.165123	0.312233	3.37049	6.07045	EEA1;RAB5A
Gene expression regulation in late stage pancreatic bud precursor cells	2/7	0.165123	0.312233	3.37049	6.07045	NOTCH1;HES1
Integrin alpha-2b beta-3 signaling	2/7	0.165123	0.312233	3.37049	6.07045	PTPN1;SHC1
Neurofascin interactions	2/7	0.165123	0.312233	3.37049	6.07045	SDCBP;NRCAM
NrCAM interactions	2/7	0.165123	0.312233	3.37049	6.07045	NRP2;NRCAM
Post-transcriptional silencing by small RNAs	2/7	0.165123	0.312233	3.37049	6.07045	AGO3;AGO2
PI3K class IB pathway in neutrophils	7/43	0.166166	0.313766	1.63945	2.94244	FGR;NRAS;NCF1;C5AR1;FPR1;PRKCQ;RHOA
Nuclear receptor transcription pathway	8/51	0.168645	0.318003	1.56877	2.79235	NR4A2;NR4A1;NR5A2;NR4A3;NR1H2;RARA;NR2E3;PPARD
E-cadherin keratinocyte pathway	4/21	0.177233	0.333267	1.98318	3.43147	CTNNB1;FYN;PIK3R1;RHOA
T cell activation co-stimulatory signal	4/21	0.177233	0.333267	1.98318	3.43147	CD86;PTPN11;GRB2;PIK3R1
Activation of Rac	3/14	0.179862	0.335412	2.29837	3.943	GPC1;SOS1;PAK2
Glycosphingolipid biosynthesis: globo series	3/14	0.179862	0.335412	2.29837	3.943	FUT1;GLA;ST3GAL1
Intronless pre-mRNA processing	3/14	0.179862	0.335412	2.29837	3.943	CPSF7;NCBP2;CSTF1
Platelet amyloid precursor protein pathway	3/14	0.179862	0.335412	2.29837	3.943	COL4A1;PLAU;SERPINE1
Polyamine metabolism	3/14	0.179862	0.335412	2.29837	3.943	SMOX;AMD1;ODC1
Sema3A-plexin repulsion signaling by inhibiting integrin adhesion	3/14	0.179862	0.335412	2.29837	3.943	FES;FYN;RND1
HNF3A pathway	7/44	0.180733	0.336109	1.59505	2.72871	CEBPB;JUN;XBP1;SERPINA1;NDUFV3;FOS;PISD
Vasopressin-regulated water reabsorption	7/44	0.180733	0.336109	1.59505	2.72871	RAB5C;CREB3L2;DYNLL1;DYNLL2;RAB5A;DYNC1I1;CREB5
Adherens junction actin cytoskeletal organization	5/29	0.188587	0.34863	1.75608	2.92949	CADM2;CDH13;CTNNB1;PVR;CDH7
BARD1 signaling events	5/29	0.188587	0.34863	1.75608	2.92949	UBE2D3;CDK2;CSTF1;RBBP8;UBE2L3
CDO in myogenesis	5/29	0.188587	0.34863	1.75608	2.92949	CDC42;SPAG9;ABL1;BNIP2;CTNNB1
Matrix metalloproteinases	5/29	0.188587	0.34863	1.75608	2.92949	MMP25;MMP28;MMP3;MMP19;TNF
Spliceosome	17/127	0.188755	0.34863	1.3038	2.17384	HSPA8;DDX5;PPIL1;NCBP2;ALYREF;EIF4A3;DDX42;HNRNPM;PRPF18;TRA2B;SRSF2;DHX15;SRSF4;SRSF10;HSPA1B;SNRPB;HSPA1A
PPAR signaling pathway	10/69	0.192805	0.355624	1.42925	2.35265	SCP2;GK;ACOX1;EHHADH;UBC;OLR1;ACSL4;ANGPTL4;SORBS1;PPARD
ALK in cardiac myocytes	6/37	0.193838	0.357042	1.63158	2.67699	ATF2;GSK3B;BMP2;TGFB1;CTNNB1;MAP3K7
Glucose metabolism	9/61	0.194719	0.357689	1.45936	2.38781	PPP2CA;PPP2CB;PFKFB3;PPP2R1B;PGAM1;ALDOC;ALDOB;ALDOA;CALM1
Licensing factor removal from origins	9/61	0.194719	0.357689	1.45936	2.38781	NQO1;PSMD12;PSMA1;PSMD14;PSMC4;PSME3;ODC1;PSMD1;AZIN1
PI3K pathway	8/53	0.195862	0.359303	1.49888	2.44369	GSK3B;RPS6KA3;NRAS;SHC1;PRKCQ;GRB2;PIK3R1;SOS1
Metabolism	182/1615	0.197404	0.36164	1.07599	1.74579	DPAGT1;CDA;AHCYL1;LPGAT1;NUP188;PITPNB;XYLT1;MSMO1;COMT;CYP46A1;SAT1;PNP;SCP2;NAMPT;LIPG;CA13;SDS;ATP6V1G2;MECR;DIO2;MED8;ACSL4;PISD;INPP4A;CH25H;MTHFD2;HMBS;FAR2;NUP98;LAP3;HPRT1;CES1;GNE;IDO1;DGKH;IPPK;IDI1;NNMT;PFKFB3;ITPR1;MGST1;UAP1;GLYAT;PIK3R1;ABHD5;FUT1;PGS1;HSD11B1;UGCG;CYP27B1;NEU4;LDHA;GNG10;RDH10;NEU1;CHST15;HMOX1;NUP88;ATP6V0A4;NDUFV3;ST3GAL1;GFPT2;PMM2;NUP153;INHBB;SYNJ2;MCAT;AZIN1;…
Glycerophospholipid biosynthesis	12/86	0.198443	0.363052	1.36759	2.21173	PGS1;LPGAT1;PNPLA8;PITPNB;MBOAT7;ETNK1;PLA2G4A;PEMT;GPCPD1;AGPAT3;PISD;AGPAT4
Beta-alanine metabolism	4/22	0.199639	0.363763	1.8729	3.01769	AOC2;EHHADH;GAD2;HIBCH
Glycosaminoglycan biosynthesis: chondroitin sulfate	4/22	0.199639	0.363763	1.8729	3.01769	CHSY1;CHST15;XYLT1;CHST3
Nephrin interactions	4/22	0.199639	0.363763	1.8729	3.01769	FYN;ACTN4;PIK3R1;SPTBN1
Adrenergic pathway	18/137	0.201729	0.367075	1.27605	2.04274	RGS18;PDE4D;RGS16;ITPR1;ADCY2;RGS4;MAPK10;RGS2;GNA15;NRAS;PLCZ1;RGS1;PDE12;PDE4B;MAPK1;PRKCQ;RGS11;MAPK6
G alpha s pathway	16/120	0.202025	0.367121	1.29773	2.07553	MAP2K3;RGS18;MAP2K1;PDE4D;RGS16;ADCY2;RGS4;MAPK10;RGS2;RGS1;PDE12;PDE4B;MAPK1;RGS11;MAPK6;RAPGEF4
Binding of RNA by insulin-like growth factor 2 mRNA binding proteins (IGF2BPs/IMPs/VICKZs)	2/8	0.205355	0.368711	2.80858	4.44603	MYC;CD44
Downregulation of ERBB4 signaling	2/8	0.205355	0.368711	2.80858	4.44603	NEDD4;UBC
Fatty acid elongation in mitochondria	2/8	0.205355	0.368711	2.80858	4.44603	MECR;PPT2
Hydrolysis of lysophosphatidylcholine (LPC)	2/8	0.205355	0.368711	2.80858	4.44603	PLA2G4A;GPCPD1
Insulin secretion regulation by fatty acids bound to GPR40 (FFAR1)	2/8	0.205355	0.368711	2.80858	4.44603	GNA14;GNA15
NOD-like receptor (NLR) proteins	2/8	0.205355	0.368711	2.80858	4.44603	CHUK;MAP3K7
Nicotinate metabolism	2/8	0.205355	0.368711	2.80858	4.44603	NAMPT;NMNAT2
Organic cation transport	2/8	0.205355	0.368711	2.80858	4.44603	SLC22A4;SLC22A5
Visceral fat deposits and the metabolic syndrome	2/8	0.205355	0.368711	2.80858	4.44603	HSD11B1;TNF
CDC42 activity regulation	5/30	0.207951	0.371316	1.68574	2.64737	BCAR3;DOCK6;CDC42;DOCK11;NME1
Activation of IRF3/IRF7 mediated by TBK1/IKK epsilon	3/15	0.208179	0.371316	2.10672	3.3062	UBC;IRF7;TICAM1
Interleukin-17 signaling pathway	3/15	0.208179	0.371316	2.10672	3.3062	CSF3;IL6;CXCL8
Mu-calpain pathway	3/15	0.208179	0.371316	2.10672	3.3062	ITGB1;EZR;RHOA
TRAF6-mediated induction of TAK1 complex	3/15	0.208179	0.371316	2.10672	3.3062	UBC;TICAM1;MAP3K7
DNA replication	26/207	0.20872	0.371791	1.21219	1.89922	AHCTF1;CDKN1A;PSMD12;SEH1L;PSMD14;MIS12;NSL1;PPP2CA;PPP2CB;PPP2R1B;UBC;PSMD1;E2F3;NDEL1;PPP2R5B;CDC7;CLIP1;PSMA1;PSMC4;PSME3;PSME4;CDK2;CENPN;NUP98;B9D2;MAPRE1
Arginine and proline metabolism	8/54	0.210107	0.372971	1.46621	2.2875	CKMT2;ALDH4A1;ARG2;NOS3;AMD1;ODC1;LAP3;SAT1
SLC-mediated transmembrane transport	31/251	0.210344	0.372971	1.18931	1.85414	SLC22A4;POM121;SEH1L;SLC22A5;NUP188;SLC20A1;SLC41A2;SLC5A11;SLC41A1;SLC4A1;SLC7A1;HK1;SLC22A12;NUP88;SLC16A3;SLC38A2;SLC10A6;SLC2A11;SLC11A1;SLC16A10;SLC30A1;NUP153;SLC39A14;SLC5A6;SLC7A5;SLC9A4;SLCO3A1;SLCO4A1;NUP50;SLCO2A1;NUP98
BMAL1-CLOCK/NPAS2 activates circadian expression	6/38	0.211037	0.372971	1.58051	2.45883	HELZ2;PER2;SERPINE1;NAMPT;BHLHE40;CRY1
EGFR interaction with phospholipase C-gamma	6/38	0.211037	0.372971	1.58051	2.45883	ITPR1;MAPK1;PLA2G4A;ADCY2;NGF;CALM1
Nuclear receptors	6/38	0.211037	0.372971	1.58051	2.45883	NR4A2;NR4A1;NR5A2;NR1H2;RARA;PPARD
Striated muscle contraction	6/38	0.211037	0.372971	1.58051	2.45883	MYBPC3;MYL4;TPM3;DMD;ACTN4;MYL9
RhoA activity regulation	7/46	0.211365	0.373063	1.51309	2.35159	ARHGAP9;BCR;AKAP13;ARHGEF15;ARHGDIG;ARHGEF1;RHOA
Rac1 cell motility signaling pathway	10/71	0.217653	0.38366	1.38223	2.1077	MAP2K3;ATF2;JUN;NCF1;STAT3;CTNNB1;PIK3R1;CRK;PAK2;BCAR1
DNA replication pre-Initiation	12/88	0.220873	0.388828	1.33145	2.01071	CDKN1A;PSMD12;PSMA1;PSMD14;PSMC4;PSME3;PSME4;UBC;CDK2;PSMD1;E2F3;CDC7
CREB transcription factor and its extracellular signals	4/23	0.222831	0.391257	1.77422	2.66371	MAPK1;GRB2;PIK3R1;SOS1
FGFR ligand binding and activation	4/23	0.222831	0.391257	1.77422	2.66371	FGF5;FGF18;FGF1;FGFR1
Mitochondrial pathway of apoptosis: BH3-only Bcl-2 family	13/97	0.227002	0.398064	1.30506	1.93514	JUN;STARD13;KCNIP3;FOXO3;DYNLL1;HIF1A;PPP2CA;MAPK10;RPS6KA3;PPP2R2B;ABL1;PRKCQ;VDAC1
Inwardly rectifying potassium channels	5/31	0.227925	0.399165	1.62081	2.39676	GNG10;GNG2;GNG5;KCNJ15;KCNJ2
Vitamin A and carotenoid metabolism	6/39	0.228743	0.400078	1.53253	2.26072	CYP26A1;RETSAT;RDH10;ALDH1A2;RARA;RDH5
Validated nuclear estrogen receptor alpha network	9/64	0.235249	0.410925	1.37953	1.99634	CEBPB;JUN;XBP1;CCND1;CHUK;MYC;DDX54;NCOA7;NDUFV3
CRMPs in Sema3A signaling	3/16	0.237386	0.410942	1.94456	2.79641	GSK3B;FES;FYN
Cell death signaling by NRIF in the nucleus	3/16	0.237386	0.410942	1.94456	2.79641	UBC;NGF;SQSTM1
JNK (c-Jun kinases) phosphorylation and activation mediated by activated human TAK1	3/16	0.237386	0.410942	1.94456	2.79641	MAPK10;IRAK2;MAP3K7
N-glycan precursor substrate biosynthesis	3/16	0.237386	0.410942	1.94456	2.79641	GFPT2;PMM2;UAP1
Other glycan degradation	3/16	0.237386	0.410942	1.94456	2.79641	NEU4;GLB1;NEU1
Other semaphorin interactions	3/16	0.237386	0.410942	1.94456	2.79641	ITGB1;SEMA4A;ITGA1
Primary bile acid biosynthesis	3/16	0.237386	0.410942	1.94456	2.79641	CH25H;SCP2;CYP46A1
Signaling by NOTCH1	10/73	0.243696	0.420866	1.3382	1.88932	HEYL;TLE2;ADAM17;TLE1;NOTCH1;FBXW7;MYC;UBC;HES1;HIF1A
Energy metabolism	7/48	0.243741	0.420866	1.43912	2.03153	ATF2;GSK3B;PPP3CC;TFB2M;FOXO3;PPRC1;PPARD
AKT phosphorylation of nuclear targets	2/9	0.246455	0.421088	2.40722	3.37149	NR4A1;FOXO3
Activation of pro-caspase 8	2/9	0.246455	0.421088	2.40722	3.37149	TNFRSF10B;RIPK1
Adrenoceptors	2/9	0.246455	0.421088	2.40722	3.37149	ADRB2;ADRA2A
Alpha defensins	2/9	0.246455	0.421088	2.40722	3.37149	DEFA3;DEFA1
Benzo(a)pyrene metabolism	2/9	0.246455	0.421088	2.40722	3.37149	AKR1C3;AKR1C2
Inactivation of Cdc42 and Rac	2/9	0.246455	0.421088	2.40722	3.37149	CDC42;GPC1
Type I hemidesmosome assembly	2/9	0.246455	0.421088	2.40722	3.37149	CD151;LAMB3
Cholesterol biosynthesis	4/24	0.246673	0.421088	1.68542	2.35906	IDI1;SQLE;MSMO1;LBR
SREBP signaling	4/24	0.246673	0.421088	1.68542	2.35906	NFYA;SAR1B;INSIG1;SEC23B
Glycine, serine and threonine metabolism	5/32	0.248426	0.423013	1.5607	2.17344	ALAS2;ALAS1;AOC2;SDS;PSAT1
Sphingolipid de novo biosynthesis	5/32	0.248426	0.423013	1.5607	2.17344	SGMS1;VAPA;SPHK1;DEGS1;SGMS2
APC/C-mediated degradation of cell cycle proteins	11/82	0.250603	0.426182	1.30619	1.80762	PSMD12;PSMA1;PSMD14;PSMC4;PSME3;PSME4;UBC;CDK2;UBE2E1;PSMD1;ANAPC11
Inositol phosphate metabolism	8/57	0.255037	0.433178	1.37621	1.88039	INPP4A;IPPK;PLCZ1;INPP1;ITPK1;SYNJ2;PI4KB;PIK3C2A
Gastric acid secretion	10/74	0.257116	0.436161	1.31722	1.78908	SLC9A4;GNAI3;ITPR1;KCNJ15;ATP1B3;ADCY2;ATP1A1;EZR;CALM1;KCNJ2
Deadenylation-dependent mRNA decay	7/49	0.260482	0.441318	1.40477	1.88973	CNOT4;EIF4A1;EIF4A3;EXOSC3;DCP1A;PAIP1;EIF4G1
FOXM1 transcription factor network	6/41	0.265446	0.449165	1.44479	1.9163	MAP2K1;CCND1;MYC;CDK2;FOS;HSPA1B
Beta-arrestin-dependent recruitment of Src kinases in GPCR signaling	3/17	0.267224	0.449922	1.80556	2.38274	FGR;MAP2K1;MAPK1
Estrogen metabolism	3/17	0.267224	0.449922	1.80556	2.38274	NQO1;STS;COMT
Ion channel function in vascular endothelium	3/17	0.267224	0.449922	1.80556	2.38274	GUCY1A2;HSP90AA1;NOS3
SUMOylation by RanBP2 regulates transcriptional repression	3/17	0.267224	0.449922	1.80556	2.38274	NUP153;PIAS2;RAN
Basigin interactions	4/25	0.271031	0.454069	1.60507	2.09546	ITGB1;SLC7A5;ATP1B3;SLC16A3
Ghrelin pathway	4/25	0.271031	0.454069	1.60507	2.09546	CXCL8;NOS3;BCL2;PLIN2
PIP2 hydrolysis	4/25	0.271031	0.454069	1.60507	2.09546	TRPC6;ITPR1;PRKCQ;DGKH
Phosphoinositides and their downstream targets	4/25	0.271031	0.454069	1.60507	2.09546	EEA1;LYN;GSK3B;RAB5A
Cell junction organization	11/84	0.2764	0.462491	1.27026	1.63344	ITGB1;CD151;PARD6A;CLDN15;LAMB3;CADM2;CDH13;CTNNB1;PVR;CDH7;LIMS1
SIDS susceptibility pathways	9/67	0.278473	0.465384	1.30796	1.67213	C4A;IL6;CXCL8;NFYA;HES1;TNF;IL6R;NFKB1;HSPD1
Protein metabolism	51/442	0.283428	0.472196	1.10076	1.38784	DPAGT1;EIF4A1;SRP19;B4GALT3;RPL6;EEF1B2;RPL7A;TUBB6;STS;TUBB3;TIMM17A;MAN1A1;CCT2;FBXW7;SPHK1;PLAUR;TIMM23;TUBB2A;PIGA;B3GNT5;TCP1;PIGK;B3GNT2;ETF1;VDAC1;RPL29;B4GALT5;SAR1B;UAP1;FURIN;HSPD1;MUC1;GRPEL1;ST3GAL1;UGGT1;CCT5;NOP56;HSPA9;ARFGEF2;GFPT2;PMM2;C1GALT1;TUBB4B;EIF2S1;CCT6A;EIF5;GGCX;EIF3I;MGAT4A;EIF3J;EIF4G1
Aldosterone-regulated sodium reabsorption	6/42	0.284329	0.472196	1.40458	1.76643	HSD11B1;MAPK1;ATP1B3;ATP1A1;PIK3R1;SGK1
Cdc25 and Chk1 regulatory pathway in response to DNA damage	2/10	0.287788	0.472196	2.1062	2.62334	WEE1;YWHAH
DCC role in regulating apoptosis	2/10	0.287788	0.472196	2.1062	2.62334	CASP9;CASP3
Ganglio sphingolipid metabolism	2/10	0.287788	0.472196	2.1062	2.62334	FUT1;ST3GAL1
Gap junction degradation	2/10	0.287788	0.472196	2.1062	2.62334	GJA1;MYO6
Glycoprotein 1b-IX-V activation signaling	2/10	0.287788	0.472196	2.1062	2.62334	VWF;PIK3R1
IKK complex recruitment by IRAK1	2/10	0.287788	0.472196	2.1062	2.62334	CHUK;PELI1
Insulin secretion regulation by acetylcholine	2/10	0.287788	0.472196	2.1062	2.62334	GNA14;GNA15
Netrin mediated repulsion signals	2/10	0.287788	0.472196	2.1062	2.62334	FYN;PTPN11
Ran role in mitotic spindle regulation	2/10	0.287788	0.472196	2.1062	2.62334	KPNA2;RAN
Reduction of cytosolic calcium levels	2/10	0.287788	0.472196	2.1062	2.62334	ATP2B4;ATP2A2
Second messenger role in netrin-1 signaling	2/10	0.287788	0.472196	2.1062	2.62334	TRPC6;PITPNA
Splicing regulation through Sam68	2/10	0.287788	0.472196	2.1062	2.62334	MAP2K1;MAPK1
TRAF6-mediated IRF7 activation in TLR7/8 or 9 signaling	2/10	0.287788	0.472196	2.1062	2.62334	IRF7;TLR8
Cysteine and methionine metabolism	5/34	0.290676	0.47463	1.4529	1.79513	LDHA;AHCYL1;SDS;MAT2A;AMD1
Monoamine transport	5/34	0.290676	0.47463	1.4529	1.79513	PPP2CB;IL1R1;IL1B;TNFRSF11B;TNF
Nuclear receptors in lipid metabolism and toxicity	5/34	0.290676	0.47463	1.4529	1.79513	CYP27B1;CYP26A1;RARA;CYP4B1;PPARD
TOR signaling	5/34	0.290676	0.47463	1.4529	1.79513	CDC42;FKBP1A;RRAGC;RHEB;MAPKAP1
Messenger RNA splicing: major pathway	9/68	0.293361	0.478437	1.28571	1.57674	PTBP1;HNRNPM;CPSF7;DHX9;ALYREF;HNRNPF;SRSF2;CSTF1;SRSF4
ALK1 pathway	4/26	0.295773	0.480055	1.53203	1.86626	FKBP1A;TGFB1;MAPK1;SMAD7
PGC-1a regulation	4/26	0.295773	0.480055	1.53203	1.86626	SLC2A14;PPP3CC;CALM1;YWHAH
Selenoamino acid metabolism	4/26	0.295773	0.480055	1.53203	1.86626	AHCYL1;MAT2A;MARS2;PAPSS2
TGF-beta signaling in development	4/26	0.295773	0.480055	1.53203	1.86626	TGFB1;ACVR1B;SPTBN1;SMAD7
Botulinum neurotoxicity	3/18	0.297453	0.481625	1.68509	2.04317	STX5;STX2;STX11
Nicotinic acetylcholine receptor role in the regulation of apoptosis	3/18	0.297453	0.481625	1.68509	2.04317	PIK3R1;FOXO3;YWHAH
Gene expression	108/968	0.302539	0.489058	1.06056	1.26794	ZNF331;EIF4A1;SRP19;CCNT1;NUP188;GTF2B;UBE2D3;EIF4A3;SERPINE1;RPL6;LSM10;EEF1B2;ZFP36;MYC;PSMD1;JUNB;ZNF200;MED8;PPA1;PSME3;PSME4;MAPKAPK2;SRSF2;SRSF4;NUP98;RPL29;SNRPB;NOTCH3;ZNF274;PSMD12;POM121;SEH1L;NOTCH1;PSMD14;DHX9;ZFP36L1;HELZ2;UBC;CSTF1;NUP88;WWTR1;HSPA8;CPSF7;ALYREF;NUP153;EIF2S1;SMAD7;CDK9;CNOT4;NR4A2;HNRNPM;NR4A1;EIF5;NR4A3;AGO3;HNRNPF;AGO2;ZNF655;DCP1A;EIF4G1;ELL;YWHAB;NR2E3;SMG5;PTB…
Insulin secretion regulation by glucagon-like peptide-1	6/43	0.303491	0.489058	1.36654	1.62947	GNG10;GNG2;GNG5;KCNB1;ITPR1;RAPGEF4
Mitotic prometaphase	6/43	0.303491	0.489058	1.36654	1.62947	AHCTF1;CLIP1;B9D2;MAPRE1;REC8;NDEL1
Type 1 diabetes mellitus	6/43	0.303491	0.489058	1.36654	1.62947	CD86;IL1A;IL1B;GAD2;TNF;HSPD1
Basal transcription factors	5/35	0.31226	0.501992	1.40439	1.6346	TAF13;GTF2B;TAF7;TAF5L;TAF2
Integrated cancer pathway	5/35	0.31226	0.501992	1.40439	1.6346	CASP9;STAT1;CASP3;CDK2;BCL2
HIV genome transcription	8/61	0.318878	0.511426	1.27206	1.4539	CDK9;CCNT1;ELL;NCBP2;TAF13;GTF2B;POLR2D;POLR2L
Transport of glucose and other sugars, bile salts and organic acids, metal ions and amine compounds	12/96	0.319272	0.511426	1.2041	1.37474	SLC22A12;SLC22A4;SLC10A6;SLC22A5;SLC2A11;SLC11A1;SLC41A2;SLC5A11;SLC41A1;SLC30A1;SLC16A3;SLC39A14
ADP signalling through P2Y purinoceptor 12	4/27	0.320776	0.511426	1.46533	1.6661	GNG10;GNG2;GNG5;GNAI3
EGFR downregulation	4/27	0.320776	0.511426	1.46533	1.6661	CDC42;UBC;GRB2;SPRY1
Glycosphingolipid biosynthesis: lacto and neolacto series	4/27	0.320776	0.511426	1.46533	1.6661	B4GALT3;B3GNT5;B3GNT2;FUT1
Mammalian calpain regulation of cell motility	4/27	0.320776	0.511426	1.46533	1.6661	ITGB1;MAP2K1;MAPK1;EZR
Pentose phosphate pathway	4/27	0.320776	0.511426	1.46533	1.6661	PRPS1;ALDOC;ALDOB;ALDOA
G-protein-mediated events	6/44	0.322874	0.511613	1.33051	1.50413	GNAI3;ITPR1;MAPK1;PLA2G4A;ADCY2;CALM1
Glycerophospholipid metabolism	10/79	0.32735	0.511613	1.22142	1.364	PGS1;LPGAT1;MBOAT7;ETNK1;PLA2G4A;PEMT;AGPAT3;PISD;DGKH;AGPAT4
G-protein-independent seven transmembrane receptor signaling	3/19	0.327853	0.511613	1.57969	1.76165	MAPK10;MAPK1;MAPK6
Gap junction assembly	3/19	0.327853	0.511613	1.57969	1.76165	GJA1;GJA5;GJA4
Glycosaminoglycan degradation	3/19	0.327853	0.511613	1.57969	1.76165	GLB1;HYAL2;IDS
Hypoxic and oxygen homeostasis regulation of HIF-1-alpha	3/19	0.327853	0.511613	1.57969	1.76165	EGLN1;HSP90AA1;HIF1A
Amino acid metabolism	23/195	0.328064	0.511613	1.12739	1.25653	NQO1;ARG2;PSMD12;PSMD14;SMOX;ODC1;AMD1;DIO2;INHBB;AZIN1;ALDH4A1;CKMT2;HAL;PSMA1;MAT2A;PSMC4;PSAT1;PSME3;PSME4;PSMD1;GCLM;HIBCH;IDO1
Alpha-linolenic (omega3) and linoleic (omega6) acid metabolism	2/11	0.32884	0.511613	1.87207	2.08209	SCP2;ACOX1
Cardiac protection against reactive oxygen species	2/11	0.32884	0.511613	1.87207	2.08209	GPX1;SOD2
Cystic fibrosis transmembrane conductance regulator (CFTR) and beta 2 adrenergic receptor (b2AR) pathway	2/11	0.32884	0.511613	1.87207	2.08209	ADRB2;EZR
Folate biosynthesis	2/11	0.32884	0.511613	1.87207	2.08209	GCH1;PTS
Gamma-carboxylation, transport, and amino-terminal cleavage of proteins	2/11	0.32884	0.511613	1.87207	2.08209	GGCX;FURIN
Glypican-3 pathway	2/11	0.32884	0.511613	1.87207	2.08209	GPC1;FURIN
Hormone ligand-binding G-protein coupled receptors	2/11	0.32884	0.511613	1.87207	2.08209	LHCGR;GNRH2
Integrin beta-4 pathway	2/11	0.32884	0.511613	1.87207	2.08209	LAMA5;LAMB3
Mammalian target of rapamycin complex 1 (mTORC1)-mediated signaling	2/11	0.32884	0.511613	1.87207	2.08209	RHEB;EIF4G1
Notch receptor processing	2/11	0.32884	0.511613	1.87207	2.08209	NOTCH3;NOTCH1
SUMOylation as a mechanism to modulate CtBP-dependent gene responses	2/11	0.32884	0.511613	1.87207	2.08209	UBA1;UBE2A
Serotonin transporter activity	2/11	0.32884	0.511613	1.87207	2.08209	PPP2CB;IL1B
TGF-beta signaling in gastrointestinal stem cells	2/11	0.32884	0.511613	1.87207	2.08209	TGFB1;SPTBN1
Telomerase protein component gene hTERT transcriptional regulation	2/11	0.32884	0.511613	1.87207	2.08209	MYC;MXD1
GABA A and B receptor activation	7/53	0.330145	0.513053	1.28233	1.42111	GNG10;GNG2;GNG5;GNAI3;KCNJ15;ADCY2;KCNJ2
Ion transport by P-type ATPases	5/36	0.334044	0.517328	1.35901	1.49013	ATP2B4;ATP2A2;ATP1B3;ATP1A1;ATP2C1
SNARE interactions in vesicular transport	5/36	0.334044	0.517328	1.35901	1.49013	GOSR2;STX5;STX2;VAMP4;STX11
Transport to the Golgi and subsequent modification	5/36	0.334044	0.517328	1.35901	1.49013	B4GALT3;SAR1B;MGAT4A;MAN1A1;B4GALT5
Cell adhesion molecules (CAMs)	16/133	0.336826	0.521039	1.15269	1.25435	CD86;ITGB1;CD274;SDC4;ICAM2;ICAM3;PVR;SELE;ICAM1;SELP;SELL;CLDN15;NRCAM;ESAM;ITGAV;NCAM1
Calcium signaling pathway	21/178	0.337666	0.521741	1.12759	1.22422	LHCGR;NOS3;SPHK1;PTAFR;ITPR1;ATP2B4;ATP2A2;ADCY2;ADRB2;BST1;GNA14;CYSLTR1;GNA15;EDNRB;PPP3CC;PLCZ1;TBXA2R;BDKRB2;BDKRB1;VDAC1;CALM1
Amino sugar and nucleotide sugar metabolism	6/45	0.342421	0.528486	1.29632	1.38928	UGDH;GFPT2;PMM2;UAP1;HK1;GNE
G-protein activation	4/28	0.34592	0.532063	1.4042	1.49063	GNG10;GNG2;GNG5;GNAI3
G-protein beta-gamma signalling	4/28	0.34592	0.532063	1.4042	1.49063	GNG10;GNG2;GNG5;RHOA
Recycling pathway of cell adhesion molecule L1	4/28	0.34592	0.532063	1.4042	1.49063	RPS6KA3;MAPK1;MSN;EZR
Integration of energy metabolism	15/125	0.347776	0.534083	1.14932	1.21391	KCNB1;ITPR1;ADCY2;ADRA2A;PPP2CA;GNA14;PPP2CB;GNG10;GNA15;GNG2;PPP2R1B;GNG5;LEP;CTNNB1;RAPGEF4
Phospholipase C-mediated cascade	7/54	0.348023	0.534083	1.25498	1.32461	FGF5;FGF18;ITPR1;ADCY2;FGF1;CALM1;FGFR1
Chondroitin sulfate biosynthesis	3/20	0.358224	0.547872	1.48668	1.52622	CHSY1;CHST15;CHST3
N-glycan antennae elongation in the medial/trans-Golgi	3/20	0.358224	0.547872	1.48668	1.52622	B4GALT3;MGAT4A;B4GALT5
Peroxisomal lipid metabolism	3/20	0.358224	0.547872	1.48668	1.52622	SCP2;ACOX1;FAR2
Cell cycle checkpoints	14/117	0.359437	0.549107	1.14551	1.1721	PSMD12;CDKN1A;PSMD14;UBE2E1;CDC7;ANAPC11;WEE1;PSMA1;PSMC4;PSME3;PSME4;UBC;CDK2;PSMD1
Collagen biosynthesis and modifying enzymes	8/64	0.368553	0.558085	1.20371	1.20151	ADAMTS2;COL15A1;CRTAP;PCOLCE2;COL24A1;COL4A1;COL12A1;PLOD2
Bile salt and organic anion SLC transporters	2/12	0.369206	0.558085	1.68477	1.67871	SLC10A6;SLC16A3
Caspase-mediated cleavage of cytoskeletal proteins	2/12	0.369206	0.558085	1.68477	1.67871	CASP3;MAPT
Granzyme A-mediated apoptosis pathway	2/12	0.369206	0.558085	1.68477	1.67871	CASP3;NME1
NF-kappaB activation through FADD/RIP-1 pathway	2/12	0.369206	0.558085	1.68477	1.67871	CHUK;RIPK1
Phosphatidylethanolamine biosynthesis	2/12	0.369206	0.558085	1.68477	1.67871	ETNK1;PISD
Rab GTPases mark targets in the endocytotic machinery	2/12	0.369206	0.558085	1.68477	1.67871	RAB2A;RAB5A
Reversible hydration of carbon dioxide	2/12	0.369206	0.558085	1.68477	1.67871	CA1;CA13
Toll-like receptor endosomal trafficking and processing	2/12	0.369206	0.558085	1.68477	1.67871	CTSL;TLR8
Cap-dependent translation initiation	9/73	0.370193	0.558085	1.18494	1.17751	EIF4A1;RPL7A;EIF5;EIF3I;EIF3J;RPL29;EIF2S1;RPL6;EIF4G1
ADP-ribosylation factor	4/29	0.371093	0.558085	1.34796	1.33623	CYTH2;ARFGEF2;CYTH1;GPLD1
Inhibition of insulin secretion by adrenaline/noradrenaline	4/29	0.371093	0.558085	1.34796	1.33623	GNG10;GNG2;GNG5;ADRA2A
Post-translational modification: biosynthesis of GPI-anchored proteins	4/29	0.371093	0.558085	1.34796	1.33623	PIGA;PLAUR;PIGK;GPLD1
RNA polymerase	4/29	0.371093	0.558085	1.34796	1.33623	POLR3D;POLR2D;POLR1C;POLR2L
RAC1 activity regulation	5/38	0.377908	0.567702	1.2765	1.24217	ARHGAP9;DOCK6;BCR;ELMO1;SOS1
Melanogenesis	12/101	0.385317	0.57819	1.13614	1.08352	GSK3B;MAP2K1;NRAS;EDNRB;WNT2B;FZD5;CREB3L2;GNAI3;MAPK1;CTNNB1;ADCY2;CALM1
APC/C activator regulation between G1/S and early anaphase	3/21	0.388389	0.579583	1.40401	1.32784	CDK2;UBE2E1;ANAPC11
Nicotine activity on dopaminergic neurons	3/21	0.388389	0.579583	1.40401	1.32784	GNG2;CHRNA6;ADCY2
PKC-catalyzed phosphorylation of inhibitory phosphoprotein of myosin phosphatase	3/21	0.388389	0.579583	1.40401	1.32784	GNA13;GNA12;ARHGEF1
Presynaptic function of kainate receptors	3/21	0.388389	0.579583	1.40401	1.32784	GNG10;GNG2;GNG5
Y branching of actin filaments	3/21	0.388389	0.579583	1.40401	1.32784	CDC42;PIR;ABL2
Activation of kainate receptors upon glutamate binding	4/30	0.396192	0.588628	1.29604	1.19995	GNG10;GNG2;GNG5;CALM1
Biosynthesis of the N-glycan precursor (dolichol lipid-linked oligosaccharide, LLO) and transfer to a nascent protein	4/30	0.396192	0.588628	1.29604	1.19995	DPAGT1;GFPT2;PMM2;UAP1
Gap junction trafficking and regulation	4/30	0.396192	0.588628	1.29604	1.19995	GJA1;GJA5;GJA4;MYO6
MicroRNAs in muscle cell differentiation	4/30	0.396192	0.588628	1.29604	1.19995	SRF;ID2;PRKCQ;EZH2
Extracellular matrix organization	11/93	0.399814	0.593357	1.13027	1.03618	ADAMTS2;MMP25;COL15A1;CRTAP;PCOLCE2;COL24A1;COL4A1;COL12A1;MMP3;PLOD2;FURIN
Chondroitin sulfate/dermatan sulfate metabolism	6/48	0.401518	0.595232	1.20352	1.09822	SDC4;CHSY1;GPC1;CHST15;IDS;CHST3
Adenylate cyclase inhibitory pathway	2/13	0.408569	0.600418	1.53152	1.37086	GNAI3;ADCY2
FGFR4 ligand binding and activation	2/13	0.408569	0.600418	1.53152	1.37086	FGF18;FGF1
HIV life cycle early phase	2/13	0.408569	0.600418	1.53152	1.37086	HMGA1;CXCR4
Irinotecan pathway	2/13	0.408569	0.600418	1.53152	1.37086	ABCC1;CES1
NICD trafficking to the nucleus	2/13	0.408569	0.600418	1.53152	1.37086	NOTCH3;NOTCH1
PIP biosynthesis at the early endosome membrane	2/13	0.408569	0.600418	1.53152	1.37086	INPP4A;PIK3C2A
Purine salvage	2/13	0.408569	0.600418	1.53152	1.37086	PNP;HPRT1
p27 phosphorylation regulation during cell cycle progression	2/13	0.408569	0.600418	1.53152	1.37086	TFDP1;CDK2
S phase	13/112	0.410389	0.602438	1.10639	0.985408	PSMD12;CDKN1A;PSMD14;WEE1;CCND1;PSMA1;PSMC4;MYC;PSME3;PSME4;UBC;CDK2;PSMD1
Asparagine N-linked glycosylation	10/85	0.415598	0.609423	1.12333	0.986327	DPAGT1;B4GALT3;SAR1B;GFPT2;MGAT4A;PMM2;MAN1A1;UAP1;UGGT1;B4GALT5
CCR3 signaling in eosinophils	3/22	0.418192	0.6119	1.33004	1.15955	MAP2K1;MAPK1;RHOA
Fanconi anemia pathway	3/22	0.418192	0.6119	1.33004	1.15955	UBE2T;UBC;FANCB
Amino acid transport across the plasma membrane	4/31	0.42112	0.612457	1.24797	1.07929	SLC7A5;SLC16A10;SLC7A1;SLC38A2
Gluconeogenesis	4/31	0.42112	0.612457	1.24797	1.07929	PGAM1;ALDOC;ALDOB;ALDOA
Ras family activation regulation	4/31	0.42112	0.612457	1.24797	1.07929	NRAS;DAB2IP;GRB2;SOS1
Transport of vitamins, nucleosides, and related molecules	4/31	0.42112	0.612457	1.24797	1.07929	SLC5A6;SLCO3A1;SLCO4A1;SLCO2A1
Glycerolipid metabolism	6/49	0.421197	0.612457	1.17547	1.01637	GK;LIPG;GLA;AGPAT3;DGKH;AGPAT4
APOBEC3G-mediated resistance to HIV-1 infection	1/5	0.429445	0.612457	2.10568	1.77985	HMGA1
Abacavir metabolism	1/5	0.429445	0.612457	2.10568	1.77985	NT5C2
Activation of RAS in B cells	1/5	0.429445	0.612457	2.10568	1.77985	NRAS
Beta-oxidation of myristoyl-CoA to lauroyl-CoA	1/5	0.429445	0.612457	2.10568	1.77985	ACADVL
Chk1/Chk2(Cds1)-mediated inactivation of cyclin B-Cdk1 complex	1/5	0.429445	0.612457	2.10568	1.77985	WEE1
Cycling of Ran in nucleocytoplasmic transport	1/5	0.429445	0.612457	2.10568	1.77985	RAN
FGFR1b ligand binding and activation	1/5	0.429445	0.612457	2.10568	1.77985	FGF1
GDP-mannose biosynthesis	1/5	0.429445	0.612457	2.10568	1.77985	PMM2
Heme degradation	1/5	0.429445	0.612457	2.10568	1.77985	HMOX1
Histidine catabolism	1/5	0.429445	0.612457	2.10568	1.77985	HAL
Ion channel and phorbal esters signaling pathway	1/5	0.429445	0.612457	2.10568	1.77985	P2RY2
Kit receptor transcriptional targets	1/5	0.429445	0.612457	2.10568	1.77985	VEGFA
Leukotriene receptors	1/5	0.429445	0.612457	2.10568	1.77985	CYSLTR1
N-glycan trimming and elongation in the cis-Golgi	1/5	0.429445	0.612457	2.10568	1.77985	MAN1A1
NOSTRIN-mediated endothelial NOS trafficking	1/5	0.429445	0.612457	2.10568	1.77985	NOS3
Phospholipase C delta-1 interactions in phospholipid-associated cell signaling	1/5	0.429445	0.612457	2.10568	1.77985	TGM2
Polo-like kinase 3 (PLK3) pathway	1/5	0.429445	0.612457	2.10568	1.77985	PLK3
Sodium-coupled phosphate cotransporters	1/5	0.429445	0.612457	2.10568	1.77985	SLC20A1
Tachykinin receptors bind tachykinins	1/5	0.429445	0.612457	2.10568	1.77985	TAC1
Non-class A, B, C GPCRs	10/86	0.430418	0.612553	1.10849	0.934454	P2RY13;GPR132;CXCR1;GPR183;CXCR2;S1PR1;ADRB2;GPR84;ACKR1;GPR135
Progesterone-mediated oocyte maturation	10/86	0.430418	0.612553	1.10849	0.934454	MAPK10;RPS6KA3;HSP90AA1;MAP2K1;CDK2;GNAI3;MAPK1;ADCY2;PIK3R1;ANAPC11
Alzheimer's disease	19/169	0.43158	0.61356	1.06721	0.896784	GSK3B;ITPR1;ATP2A2;TNF;COX7A1;TNFRSF1A;ERN1;CASP9;ADAM17;PPP3CC;CASP3;IL1B;CYCS;MAPK1;NDUFV3;MAPT;CALM1;ATF6;SNCA
Influenza infection	16/142	0.43973	0.62449	1.06981	0.878952	POM121;HSP90AA1;SEH1L;TGFB1;NUP188;NUP153;RPL6;RPL7A;NUP50;POLR2D;NUP88;NUP98;RPL29;RAN;POLR2L;HSPA1A
Phosphatidylinositol metabolism	6/50	0.440787	0.625335	1.14869	0.940997	INPP4A;PITPNB;PIK3R1;SYNJ2;PI4KB;PIK3C2A
Graft-versus-host disease	5/41	0.443394	0.627609	1.16993	0.951501	CD86;IL1A;IL6;IL1B;TNF
Prothrombin activation intrinsic pathway	4/32	0.445791	0.627609	1.20333	0.972177	ZFHX3;VWF;COL4A1;F5
CARM1 transcriptional regulation by protein methylation	2/14	0.446686	0.627609	1.40382	1.13134	BCL2;RARA
Coagulation common pathway	2/14	0.446686	0.627609	1.40382	1.13134	THBD;F5
DCC-mediated attractive signaling	2/14	0.446686	0.627609	1.40382	1.13134	CDC42;FYN
MAP kinase inactivation of SMRT corepressor	2/14	0.446686	0.627609	1.40382	1.13134	MAP2K1;RARA
Osteoblast signaling	2/14	0.446686	0.627609	1.40382	1.13134	TNFRSF11B;ITGAV
Viral messenger RNA biosynthesis	2/14	0.446686	0.627609	1.40382	1.13134	POLR2D;POLR2L
Nitrogen metabolism	3/23	0.447496	0.627609	1.26347	1.01594	CA1;HAL;CA13
RNA polymerase III transcription termination	3/23	0.447496	0.627609	1.26347	1.01594	POLR3D;POLR1C;POLR2L
Rho cell motility signaling pathway	3/23	0.447496	0.627609	1.26347	1.01594	ARHGEF1;RHOA;VCL
Transcription	20/181	0.459877	0.644305	1.04648	0.8129	CPSF7;RRN3;CCNT1;ELL;NCBP2;TAF13;GTF2B;ALYREF;TFB2M;LSM10;CDK9;TAF1B;POLR3D;POLR1C;POLR2D;SRSF2;CSTF1;SRSF4;SNRPB;POLR2L
Vascular smooth muscle contraction	13/116	0.461843	0.646389	1.06319	0.821342	GUCY1A2;MAP2K1;ITPR1;PLA2G4A;ADCY2;RHOA;GNA13;GNA12;MAPK1;PRKCQ;ARHGEF1;CALM1;MYL9
Messenger RNA splicing: minor pathway	5/42	0.46489	0.64998	1.13825	0.871847	NCBP2;POLR2D;SRSF2;POLR2L;SNRPB
Long-term potentiation	8/70	0.468751	0.653918	1.08686	0.823496	RPS6KA3;MAP2K1;NRAS;PPP3CC;ITPR1;MAPK1;CALM1;ATF4
E2F-mediated regulation of DNA replication	4/33	0.470125	0.653918	1.16177	0.876855	PPP2CA;PPP2CB;TFDP1;PPP2R1B
Fluoropyrimidine activity	4/33	0.470125	0.653918	1.16177	0.876855	CDA;UCK2;UPP1;CES1
Glucagon signaling in metabolic regulation	4/33	0.470125	0.653918	1.16177	0.876855	GNG10;GNG2;GNG5;ADCY2
PIP biosynthesis at the plasma membrane	4/33	0.470125	0.653918	1.16177	0.876855	INPP4A;PIK3R1;SYNJ2;PIK3C2A
Salivary secretion	10/89	0.474655	0.659541	1.06621	0.794507	GUCY1A2;BST1;ITPR1;ATP2B4;ATP1B3;ADCY2;ADRB2;ATP1A1;CALM1;CAMP
Ras-independent pathway in NK cell-mediated cytotoxicity	3/24	0.476185	0.66031	1.20323	0.892738	ITGB1;MAP2K1;PIK3R1
Triacylglyceride biosynthesis	3/24	0.476185	0.66031	1.20323	0.892738	GK;AGPAT3;AGPAT4
Mitochondrial protein import	6/52	0.479527	0.66384	1.09862	0.807437	HSPA9;GRPEL1;TIMM17A;TIMM23;VDAC1;HSPD1
AKAP95 role in mitosis and chromosome dynamics	2/15	0.48338	0.66384	1.29576	0.941956	PPP2CA;DDX5
Association of licensing factors with the pre-replicative complex	2/15	0.48338	0.66384	1.29576	0.941956	UBC;E2F3
Biogenic amine biosynthesis	2/15	0.48338	0.66384	1.29576	0.941956	GAD2;COMT
Extrinsic prothrombin activation pathway	2/15	0.48338	0.66384	1.29576	0.941956	ZFHX3;F5
Glycosphingolipid biosynthesis: ganglio series	2/15	0.48338	0.66384	1.29576	0.941956	GLB1;ST3GAL1
Glycosylation of mammalian N-linked oligosaccarides	2/15	0.48338	0.66384	1.29576	0.941956	ST8SIA4;MAN1A1
Spliceosomal assembly	2/15	0.48338	0.66384	1.29576	0.941956	SRSF2;SNRPB
Terpenoid backbone biosynthesis	2/15	0.48338	0.66384	1.29576	0.941956	IDI1;DHDDS
Phase II of biological oxidations: conjugation	8/71	0.485216	0.66384	1.06955	0.773456	UGDH;NNMT;MAT2A;MGST1;GLYAT;COMT;GCLM;PAPSS2
Activation of C3 and C5	1/6	0.490024	0.66384	1.68445	1.20152	C4A
Acyl chain remodeling of cardiolipin	1/6	0.490024	0.66384	1.68445	1.20152	PLA2G4A
Beta-oxidation of very long chain fatty acids	1/6	0.490024	0.66384	1.68445	1.20152	ACOX1
Cell cycle negative regulation by p75 neurotrophin receptor	1/6	0.490024	0.66384	1.68445	1.20152	NGF
ER quality control compartment (ERQC)	1/6	0.490024	0.66384	1.68445	1.20152	UGGT1
FGFR2b ligand binding and activation	1/6	0.490024	0.66384	1.68445	1.20152	FGF1
Influenza factor interactions with host	1/6	0.490024	0.66384	1.68445	1.20152	TGFB1
Klotho-mediated ligand binding	1/6	0.490024	0.66384	1.68445	1.20152	FGFR1
Multi-drug resistance factors	1/6	0.490024	0.66384	1.68445	1.20152	ABCC1
Neurotransmitter clearance in the synaptic cleft	1/6	0.490024	0.66384	1.68445	1.20152	COMT
PDGF genes and receptors	1/6	0.490024	0.66384	1.68445	1.20152	PDGFA
Vitamin B6 metabolism	1/6	0.490024	0.66384	1.68445	1.20152	PSAT1
eIF4E release	1/6	0.490024	0.66384	1.68445	1.20152	RHEB
Fatty acid beta oxidation	4/34	0.494051	0.668626	1.12298	0.791833	ACADVL;GK;ACSL4;SLC25A20
Pyrimidine metabolism	11/100	0.497832	0.673068	1.04096	0.726066	CDA;UCK2;PNP;TXNRD1;POLR3D;POLR1C;POLR2D;UPP1;NT5C2;NME1;POLR2L
Androgen receptor regulation of biosynthesis and transcription	6/53	0.498597	0.67343	1.07519	0.748284	DNAJA1;GSK3B;EGR1;HSP90AA1;JUN;REL
Myocyte adrenergic pathway	8/72	0.501543	0.676733	1.05278	0.726486	FKBP1A;MAPK10;ASAH1;GNA15;NRAS;ITPR1;PLA2G4A;ADRB2
APC/C- and Cdc20-mediated degradation of Nek2A	3/25	0.504161	0.67756	1.14848	0.786546	UBC;UBE2E1;ANAPC11
Fatty acid biosynthesis	3/25	0.504161	0.67756	1.14848	0.786546	MECR;ACSL4;MCAT
G0 and early G1 pathway	3/25	0.504161	0.67756	1.14848	0.786546	TFDP1;CDK2;DYRK1A
RNA polymerase I transcription initiation	3/25	0.504161	0.67756	1.14848	0.786546	RRN3;TAF1B;POLR1C
Transmembrane transport of small molecules	46/432	0.514547	0.690001	1.00357	0.666843	SLC22A4;POM121;SEH1L;SLC22A5;NUP188;SLC20A1;SLC41A2;AQP9;SLC5A11;SLC41A1;ATP2A2;SLC4A1;ADCY2;ATP1A1;ATP2C1;SLC7A1;HK1;SLC22A12;GNG10;GNG2;GNG5;HMOX1;NUP88;ATP6V0A4;SLC16A3;SLC38A2;SLC10A6;ABCC1;ATP6V1G2;SLC2A11;SLC11A1;ABCC6;ATP2B4;SLC16A10;ATP1B3;SLC30A1;NUP153;SLC39A14;SLC5A6;SLC7A5;SLC9A4;SLCO3A1;SLCO4A1;NUP50;SLCO2A1;NUP98
Post-translational protein modification	21/196	0.516366	0.690001	1.01058	0.667933	DPAGT1;B4GALT3;SAR1B;GFPT2;PMM2;C1GALT1;PLAUR;UAP1;FURIN;MUC1;STS;GGCX;B3GNT5;PIGA;MGAT4A;PIGK;B3GNT2;MAN1A1;ST3GAL1;UGGT1;B4GALT5
Acyl chain remodelling of phosphatidylinositol	2/16	0.518522	0.690001	1.20314	0.790189	MBOAT7;PLA2G4A
Cell-extracellular matrix interactions	2/16	0.518522	0.690001	1.20314	0.790189	ITGB1;LIMS1
Control of cell cycle and breast tumor growth by estrogen-responsive protein Efp	2/16	0.518522	0.690001	1.20314	0.790189	SMURF1;CDK2
Ghrelin biosynthesis, secretion, and deacylation	2/16	0.518522	0.690001	1.20314	0.790189	LEP;KLF4
Nucleotide-like (purinergic) G-protein coupled receptors	2/16	0.518522	0.690001	1.20314	0.790189	P2RY13;P2RY2
Protein kinase A (PKA) at the centrosome	2/16	0.518522	0.690001	1.20314	0.790189	PPP2CA;RHOA
Rap1 signaling	2/16	0.518522	0.690001	1.20314	0.790189	YWHAB;RAPGEF4
Sonic Hedgehog (Shh) pathway	2/16	0.518522	0.690001	1.20314	0.790189	GSK3B;DYRK1A
HNF3B pathway	5/45	0.527636	0.701439	1.0527	0.673045	ACADVL;CEBPB;ALAS1;CEBPD;ALDOB
Galactose metabolism	3/26	0.531342	0.704288	1.09848	0.694625	GLB1;GLA;HK1
Interaction between L1-type proteins and ankyrins	3/26	0.531342	0.704288	1.09848	0.694625	SPTA1;NRCAM;SPTBN1
Steroid biosynthesis	3/26	0.531342	0.704288	1.09848	0.694625	CYP27B1;SQLE;MSMO1
Neurotransmitter release cycle	4/36	0.540441	0.711531	1.05268	0.647786	HSPA8;GAD2;SLC38A2;SYN2
Acetylcholine biosynthesis	1/7	0.544174	0.711531	1.40363	0.854088	PEMT
Creatine metabolism	1/7	0.544174	0.711531	1.40363	0.854088	CKMT2
FXR and LXR regulation of cholesterol metabolism	1/7	0.544174	0.711531	1.40363	0.854088	LDLR
Fas signaling pathway in cardiomyocytes	1/7	0.544174	0.711531	1.40363	0.854088	GSK3B
Gamma-secretase-mediated ErbB4 signaling pathway	1/7	0.544174	0.711531	1.40363	0.854088	ADAM17
Glucocorticoid biosynthesis	1/7	0.544174	0.711531	1.40363	0.854088	HSD11B1
Nectin/Necl trans heterodimerization	1/7	0.544174	0.711531	1.40363	0.854088	PVR
PELP1 modulation of estrogen receptor activity	1/7	0.544174	0.711531	1.40363	0.854088	MAPK1
Phase I of biological oxidations: non-cytochrome P450 enzymes	1/7	0.544174	0.711531	1.40363	0.854088	PON2
Phosphatidylglycerol biosynthesis	1/7	0.544174	0.711531	1.40363	0.854088	PGS1
Telomerase RNA component gene hTERC transcriptional regulation	1/7	0.544174	0.711531	1.40363	0.854088	NFYA
Vitamin D (calciferol) metabolism	1/7	0.544174	0.711531	1.40363	0.854088	CYP27B1
Zinc efflux and compartmentalization by the SLC30 family	1/7	0.544174	0.711531	1.40363	0.854088	SLC30A1
Acyl chain remodelling of phosphatidylglycerol	2/17	0.552028	0.714887	1.12287	0.667158	LPGAT1;PLA2G4A
Apoptotic cleavage of cellular proteins	2/17	0.552028	0.714887	1.12287	0.667158	CASP3;PRKCQ
Chylomicron-mediated lipid transport	2/17	0.552028	0.714887	1.12287	0.667158	SAR1B;LDLR
Complement activation, classical pathway	2/17	0.552028	0.714887	1.12287	0.667158	C4A;CD55
Energy-dependent regulation of mTOR by LKB1-AMPK	2/17	0.552028	0.714887	1.12287	0.667158	CAB39L;RHEB
Osteoclast signaling	2/17	0.552028	0.714887	1.12287	0.667158	TNFRSF11B;IFNAR1
PIP biosynthesis at the Golgi membrane	2/17	0.552028	0.714887	1.12287	0.667158	PI4KB;PIK3C2A
Synaptic proteins at the synaptic junction	2/17	0.552028	0.714887	1.12287	0.667158	NCAM1;SPTBN1
Syndecan 3 pathway	2/17	0.552028	0.714887	1.12287	0.667158	CXCL8;FYN
Zinc transporters	2/17	0.552028	0.714887	1.12287	0.667158	SLC30A1;SLC39A14
Bile acid and bile salt metabolism	3/27	0.557663	0.719427	1.05265	0.614751	CH25H;SCP2;CYP46A1
Collecting duct acid secretion	3/27	0.557663	0.719427	1.05265	0.614751	ATP6V1G2;SLC4A1;ATP6V0A4
FSH signaling pathway	3/27	0.557663	0.719427	1.05265	0.614751	RHEB;MAPK1;SGK1
RNA polymerase III transcription initiation from type 2 promoter	3/27	0.557663	0.719427	1.05265	0.614751	POLR3D;POLR1C;POLR2L
ABC transporters	5/47	0.567591	0.731537	1.00246	0.567749	ABCC1;ABCA5;ABCC6;TAP2;TAP1
Activation of mRNA upon binding of the cap-binding complex and eIFs, and subsequent binding to 43S	6/57	0.572082	0.736624	0.990636	0.553243	EIF4A1;EIF5;EIF3I;EIF3J;EIF2S1;EIF4G1
G alpha (s) signaling events	13/125	0.574255	0.738718	0.977255	0.542066	PTGER4;LHCGR;PDE4D;PTGER2;GNAI3;GPBAR1;ADM;ADCY2;ADRB2;GNG10;GNG2;GNG5;PDE4B
Purine metabolism	17/164	0.57909	0.740447	0.973603	0.531877	GUCY1A2;PRPS1;GPX1;PDE4D;ADCY2;NUDT5;NT5C2;PAPSS2;NME1;PNP;POLR3D;POLR1C;POLR2D;PDE4B;HPRT1;GART;POLR2L
Endosomal sorting complex required for transport (ESCRT) pathway	3/28	0.583072	0.740447	1.01049	0.545104	UBC;VPS37C;VPS37B
Messenger RNA capping	3/28	0.583072	0.740447	1.01049	0.545104	NCBP2;POLR2D;POLR2L
Multi-step regulation of transcription by PITX2	3/28	0.583072	0.740447	1.01049	0.545104	GSK3B;CCND2;CTNNB1
Nef in HIV-1 replication and disease pathogenesis	3/28	0.583072	0.740447	1.01049	0.545104	ELMO1;FYN;PAK2
Nitric oxide stimulation of guanylate cyclase	3/28	0.583072	0.740447	1.01049	0.545104	GUCY1A2;NOS3;ITPR1
PKB-mediated events	3/28	0.583072	0.740447	1.01049	0.545104	CAB39L;RHEB;EIF4G1
PTM: gamma carboxylation, hypusine formation and arylsulfatase activation	3/28	0.583072	0.740447	1.01049	0.545104	STS;GGCX;FURIN
Phosphatidic acid biosynthesis	3/28	0.583072	0.740447	1.01049	0.545104	PLA2G4A;AGPAT3;AGPAT4
RNA polymerase III transcription initiation From type 3 promoter	3/28	0.583072	0.740447	1.01049	0.545104	POLR3D;POLR1C;POLR2L
Activated AMPK stimulation of fatty-acid oxidation in muscle	2/18	0.58385	0.740447	1.05263	0.566431	CAB39L;SLC25A20
Downregulation of MTA-3 in ER-negative breast tumors	2/18	0.58385	0.740447	1.05263	0.566431	SNAI1;ALDOA
Triglyceride biosynthesis	4/38	0.584556	0.740447	0.990645	0.53188	GK;ACSL4;AGPAT3;AGPAT4
Intestinal immune network for IgA production	5/48	0.586902	0.740447	0.979094	0.521757	CD86;IL6;TGFB1;IL15;CXCR4
Beta-oxidation of pristanoyl-CoA	1/8	0.592577	0.740447	1.20304	0.629522	SCP2
Chromatin remodeling by nuclear receptors to facilitate initiation of transcription in carcinoma cells	1/8	0.592577	0.740447	1.20304	0.629522	RARA
Cytoskeletal remodeling regulation and cell spreading by IPP complex components	1/8	0.592577	0.740447	1.20304	0.629522	LIMS1
Eosinophils in the chemokine network of allergy	1/8	0.592577	0.740447	1.20304	0.629522	CSF2
Gene expression regulation in early pancreatic precursor cells	1/8	0.592577	0.740447	1.20304	0.629522	NR5A2
Glucocorticoid and mineralcorticoid metabolism	1/8	0.592577	0.740447	1.20304	0.629522	HSD11B1
Import of palmitoyl-CoA into the mitochondrial matrix	1/8	0.592577	0.740447	1.20304	0.629522	SLC25A20
Integration of provirus	1/8	0.592577	0.740447	1.20304	0.629522	HMGA1
Mechanism of acetaminophen activity and toxicity	1/8	0.592577	0.740447	1.20304	0.629522	PTGS2
Mitochondrial beta-oxidation of saturated fatty acids	1/8	0.592577	0.740447	1.20304	0.629522	ACADVL
Mitotic metaphase/anaphase transition	1/8	0.592577	0.740447	1.20304	0.629522	REC8
Proepithelin conversion to epithelin and wound repair control	1/8	0.592577	0.740447	1.20304	0.629522	CXCL8
Recycling of eIF2-GDP complex	1/8	0.592577	0.740447	1.20304	0.629522	EIF2S1
S6K1 signaling	1/8	0.592577	0.740447	1.20304	0.629522	EIF4G1
SREBP control of lipid biosynthesis	1/8	0.592577	0.740447	1.20304	0.629522	LDLR
Thyroxine biosynthesis	1/8	0.592577	0.740447	1.20304	0.629522	DIO2
Vitamin D biosynthesis	1/8	0.592577	0.740447	1.20304	0.629522	CYP27B1
Generic transcription pathway	39/377	0.593348	0.740727	0.97108	0.506878	ZNF331;NOTCH3;ZNF274;NOTCH1;CCNT1;SERPINE1;UBE2D3;NR2E3;HELZ2;MED13;MYC;UBC;ZNF226;JUNB;TEAD2;ZNF586;TEAD3;ZNF200;TEAD4;TGIF1;WWTR1;CDKN2B;ZNF460;NR1H2;MED8;MED26;SMAD7;SKI;CDK9;NR4A2;NR4A1;NR5A2;NR4A3;TFDP1;RARA;ZNF655;ZNF597;TRIM33;PPARD
HIV-1 transcription initiation	4/39	0.605666	0.755406	0.962287	0.482516	TAF13;GTF2B;POLR2D;POLR2L
RNA degradation	6/59	0.606762	0.756075	0.953147	0.47621	HSPA9;CNOT4;EXOSC3;DCP1A;HSPD1;MPHOSPH6
Alpha-linolenic acid metabolism	2/19	0.613967	0.762244	0.990654	0.483254	ACOX1;PLA2G4A
ER-associated degradation (ERAD) pathway	2/19	0.613967	0.762244	0.990654	0.483254	MAN1A1;UGGT1
GABA biosynthesis, release, reuptake and degradation	2/19	0.613967	0.762244	0.990654	0.483254	HSPA8;GAD2
Tob role in T-cell activation	2/19	0.613967	0.762244	0.990654	0.483254	TGFB1;TOB1
Biological oxidations	14/139	0.62339	0.773233	0.942733	0.445519	NNMT;SMOX;MGST1;CYP4B1;GLYAT;COMT;CYP46A1;PTGS2;PAPSS2;CYP27B1;CYP26A1;UGDH;MAT2A;GCLM
Aquaporin-mediated transport	5/50	0.624059	0.773352	0.935474	0.441086	GNG10;GNG2;GNG5;AQP9;ADCY2
Nuclear signaling by ErbB4	4/40	0.626108	0.775181	0.935504	0.438034	ADAM17;PTPN11;EREG;HBEGF
Activation of matrix metalloproteinases	3/30	0.631013	0.776566	0.935535	0.430748	MMP25;MMP3;FURIN
O-glycan biosynthesis	3/30	0.631013	0.776566	0.935535	0.430748	C1GALT1;ST3GAL1;B4GALT5
Bicarbonate transporters	1/9	0.635842	0.776566	1.0526	0.476624	SLC4A1
COPII-mediated vesicle transport	1/9	0.635842	0.776566	1.0526	0.476624	SAR1B
Calcium-activated potassium channels	1/9	0.635842	0.776566	1.0526	0.476624	KCNN2
Calcium/calmodulin-dependent protein kinase activation	1/9	0.635842	0.776566	1.0526	0.476624	CALM1
Endosomal/vacuolar pathway	1/9	0.635842	0.776566	1.0526	0.476624	LNPEP
G2/M DNA damage checkpoint	1/9	0.635842	0.776566	1.0526	0.476624	WEE1
Nitric oxide effects	1/9	0.635842	0.776566	1.0526	0.476624	NOS3
PI3K/AKT signalling	1/9	0.635842	0.776566	1.0526	0.476624	RHOA
Polyadenylation of mRNA	1/9	0.635842	0.776566	1.0526	0.476624	CSTF1
Rapid glucocorticoid receptor pathway	1/9	0.635842	0.776566	1.0526	0.476624	GNG2
Sodium/proton exchangers	1/9	0.635842	0.776566	1.0526	0.476624	SLC9A4
Tat-mediated elongation of the HIV-1 transcript	1/9	0.635842	0.776566	1.0526	0.476624	ELL
Urea cycle	1/9	0.635842	0.776566	1.0526	0.476624	ARG2
Glutathione metabolism	5/51	0.641865	0.781027	0.915086	0.405729	GPX1;ODC1;MGST1;LAP3;GCLM
Lysosome	12/121	0.642267	0.781027	0.926627	0.410265	ASAH1;NPC1;CTSL;GLB1;SLC11A1;SMPD1;NEU1;AP3D1;IDS;ATP6V0A4;PPT2;GLA
Acute myocardial infarction	2/20	0.642383	0.781027	0.935565	0.414053	COL4A1;AHSP
RNA polymerase III abortive and retractive initiation	2/20	0.642383	0.781027	0.935565	0.414053	POLR3D;POLR2L
Urea cycle and metabolism of amino groups	2/20	0.642383	0.781027	0.935565	0.414053	ARG2;ODC1
Activated NOTCH1 signaling in the nucleus	3/31	0.653501	0.793831	0.902072	0.383751	ADAM17;NOTCH1;UBC
Drug metabolism: other enzymes	5/52	0.659135	0.799955	0.895566	0.373296	CDA;UCK2;UPP1;HPRT1;CES1
Eukaryotic transcription initiation	4/42	0.66491	0.801919	0.886168	0.361649	TAF13;GTF2B;POLR3D;TAF7
Fatty acid metabolism	4/42	0.66491	0.801919	0.886168	0.361649	ACADVL;ACOX1;EHHADH;ACSL4
Membrane trafficking	13/133	0.665342	0.801919	0.911694	0.371473	HSPA8;RAB5C;SAR1B;VPS37C;VPS37B;PIK3C2A;TPD52L1;GJA1;GJA5;GJA4;MYO6;UBC;PICALM
Inactivation of APC/C via direct inhibition of the APC/C complex	2/21	0.669119	0.801919	0.886275	0.356099	UBE2E1;ANAPC11
O-linked glycosylation of mucins	6/63	0.671195	0.801919	0.88606	0.353268	MUC1;B3GNT5;C1GALT1;B3GNT2;ST3GAL1;B4GALT5
Abacavir transport and metabolism	1/10	0.674515	0.801919	0.935595	0.368402	NT5C2
Activation of Src by protein tyrosine phosphatase alpha	1/10	0.674515	0.801919	0.935595	0.368402	GRB2
Activation of calcium-permeable kainate receptor	1/10	0.674515	0.801919	0.935595	0.368402	CALM1
Apoptotic DNA fragmentation and tissue homeostasis	1/10	0.674515	0.801919	0.935595	0.368402	CASP3
Bile acid and bile salt biosynthesis via 24-hydroxycholesterol	1/10	0.674515	0.801919	0.935595	0.368402	CYP46A1
Bile acids and bile salt biosynthesis	1/10	0.674515	0.801919	0.935595	0.368402	CH25H
Calcitonin-like ligand receptors	1/10	0.674515	0.801919	0.935595	0.368402	ADM
Fanconi anemia pathway regulation	1/10	0.674515	0.801919	0.935595	0.368402	UBC
NODAL signaling regulation	1/10	0.674515	0.801919	0.935595	0.368402	ACVR1B
PIP biosynthesis at the late endosome membrane	1/10	0.674515	0.801919	0.935595	0.368402	PIK3C2A
Phospholipase C signaling pathway	1/10	0.674515	0.801919	0.935595	0.368402	PIK3R1
Rheb GTPase activity by AMPK regulation	1/10	0.674515	0.801919	0.935595	0.368402	RHEB
Signal-dependent regulation of myogenesis by corepressor MITR	1/10	0.674515	0.801919	0.935595	0.368402	YWHAH
Taurine and hypotaurine metabolism	1/10	0.674515	0.801919	0.935595	0.368402	GAD2
Zinc influx into cells by the SLC39 gene family	1/10	0.674515	0.801919	0.935595	0.368402	SLC39A14
Alanine, aspartate and glutamate metabolism	3/32	0.674988	0.801919	0.870917	0.342323	ALDH4A1;GFPT2;GAD2
Fibrin clot formation (clotting cascade)	3/32	0.674988	0.801919	0.870917	0.342323	THBD;VWF;F5
Hypothetical network for drug addiction	3/32	0.674988	0.801919	0.870917	0.342323	MAP2K1;PPA1;MAPK1
Pancreatic beta-cell development regulation	3/32	0.674988	0.801919	0.870917	0.342323	NOTCH1;NR5A2;HES1
Class A GPCRs (rhodopsin-like)	25/253	0.67845	0.805324	0.922401	0.35784	PTGER4;PTGER2;PTAFR;FPR1;CXCR4;FPR2;ADRB2;HCAR3;CYSLTR1;EDNRB;CXCR1;TBXA2R;P2RY2;CXCR2;BDKRB2;BDKRB1;CCR7;FFAR2;P2RY13;LHCGR;GPR75;GPR4;GPR3;ADRA2A;RGL4
Wnt/calcium/cyclic GMP pathway	7/74	0.682281	0.809161	0.87937	0.336196	WNT2B;PLCZ1;FZD5;ITPR1;NFATC2;PRKCQ;NFATC1
Porphyrin and chlorophyll metabolism	4/43	0.683247	0.809596	0.863397	0.328868	ALAS2;ALAS1;HMBS;HMOX1
Influenza viral RNA transcription and replication	12/125	0.686691	0.812965	0.893625	0.335888	PPP2CA;RPL7A;HSP90AA1;NCBP2;EIF4A3;POLR2D;ETF1;RPL29;RPL6;SMG5;EIF4G1;POLR2L
Nitric oxide signaling pathway	2/22	0.694212	0.819775	0.841914	0.30728	PPP3CC;CALM1
RNA polymerase II promoter escape	2/22	0.694212	0.819775	0.841914	0.30728	TAF13;GTF2B
Glucagon-type ligand receptors	3/33	0.695475	0.819775	0.84184	0.305723	GNG10;GNG2;GNG5
Negative regulators of RIG-I/MDA5 signaling	3/33	0.695475	0.819775	0.84184	0.305723	UBE2D3;UBC;TNFAIP3
Propanoate metabolism	3/33	0.695475	0.819775	0.84184	0.305723	LDHA;EHHADH;HIBCH
Basal cell carcinoma	5/55	0.707631	0.825736	0.84169	0.291084	GSK3B;BMP2;WNT2B;FZD5;CTNNB1
ALK2 pathway	1/11	0.709082	0.825736	0.841989	0.289462	FKBP1A
B lymphocyte cell surface molecules	1/11	0.709082	0.825736	0.841989	0.289462	ICAM1
Bone mineralization regulation	1/11	0.709082	0.825736	0.841989	0.289462	COL4A1
CDC6 association with the ORC-origin complex	1/11	0.709082	0.825736	0.841989	0.289462	E2F3
Glutathione biosynthesis and recycling	1/11	0.709082	0.825736	0.841989	0.289462	GCLM
Keratan sulfate degradation	1/11	0.709082	0.825736	0.841989	0.289462	GLB1
Messenger RNA decay by 3' to 5' exoribonuclease	1/11	0.709082	0.825736	0.841989	0.289462	EXOSC3
Passive transport by aquaporins	1/11	0.709082	0.825736	0.841989	0.289462	AQP9
Purine ribonucleoside monophosphate biosynthesis	1/11	0.709082	0.825736	0.841989	0.289462	GART
Reversal of insulin resistance by leptin	1/11	0.709082	0.825736	0.841989	0.289462	LEP
Tryptophan catabolism	1/11	0.709082	0.825736	0.841989	0.289462	IDO1
Vitamin B5 (pantothenate) metabolism	1/11	0.709082	0.825736	0.841989	0.289462	SLC5A6
Vitamin C in the brain	1/11	0.709082	0.825736	0.841989	0.289462	COL4A1
Incretin biosynthesis, secretion, and inactivation	2/23	0.717709	0.832978	0.801778	0.265943	LEP;CTNNB1
Proximal tubule bicarbonate reclamation	2/23	0.717709	0.832978	0.801778	0.265943	ATP1B3;ATP1A1
Th1/Th2 differentiation pathway	2/23	0.717709	0.832978	0.801778	0.265943	CD86;IL4R
RNA polymerase III transcription	4/45	0.717766	0.832978	0.821188	0.272316	SFPQ;POLR3D;POLR1C;POLR2L
Steroid hormone biosynthesis	5/56	0.722674	0.837955	0.82514	0.268003	HSD11B1;STS;AKR1C3;AKR1C2;COMT
cAMP cell motility pathway inferred from amoeba model	6/67	0.728467	0.843949	0.827772	0.262248	MAP2K1;GCA;PDE12;PDE4D;PDE4B;ITPR1
Immunoregulatory interactions between a lymphoid and a non-lymphoid cell	11/119	0.729908	0.844255	0.856916	0.269788	ITGB1;SELL;ICAM2;ICAM3;ICAM4;LILRA1;LILRB2;LILRB3;PVR;CD200;ICAM1
Transmission across chemical synapses	18/190	0.729981	0.844255	0.880213	0.277035	HSPA8;CACNA2D1;CHRNA6;GNAI3;KCNJ15;GAD2;ADCY2;COMT;SYN2;RPS6KA3;GNG10;GNG2;GNG5;MYO6;MAPK1;CALM1;SLC38A2;KCNJ2
Primary immunodeficiency	3/35	0.733479	0.844977	0.789136	0.244598	RFX5;TAP2;TAP1
Polo-like kinase 1 (PLK1) pathway	4/46	0.733951	0.844977	0.801591	0.247943	PPP2CA;WEE1;ODF2;RHOA
Peroxisome	7/78	0.734617	0.844977	0.829641	0.255866	SCP2;ACOX1;EHHADH;ACSL4;FAR2;DECR2;SOD2
Sulfur amino acid metabolism	2/24	0.739665	0.844977	0.765291	0.230779	MAT2A;GCLM
Alanine and aspartate metabolism	1/12	0.73998	0.844977	0.765401	0.230487	GAD2
Dopamine neurotransmitter release cycle	1/12	0.73998	0.844977	0.765401	0.230487	SYN2
Facilitative sodium-independent glucose transporters	1/12	0.73998	0.844977	0.765401	0.230487	SLC2A11
Gamma-aminobutyric acid receptor life cycle	1/12	0.73998	0.844977	0.765401	0.230487	UBQLN1
Hormone-sensitive lipase (HSL)-mediated triacylglycerol hydrolysis	1/12	0.73998	0.844977	0.765401	0.230487	ABHD5
Nucleotide G-protein coupled receptors (GPCRs)	1/12	0.73998	0.844977	0.765401	0.230487	P2RY2
Opening of calcium channels triggered by depolarization of the presynaptic terminal	1/12	0.73998	0.844977	0.765401	0.230487	CACNA2D1
Peptide hormone biosynthesis	1/12	0.73998	0.844977	0.765401	0.230487	INHBB
Phospholipase C epsilon pathway	1/12	0.73998	0.844977	0.765401	0.230487	ADRB2
Pyrimidine catabolism	1/12	0.73998	0.844977	0.765401	0.230487	UPP1
Salmonella infection	1/12	0.73998	0.844977	0.765401	0.230487	CDC42
Parkinson's disease	12/131	0.746817	0.852064	0.848282	0.247644	CASP9;UCHL1;LRRK2;CASP3;CYCS;VDAC1;UBA1;UBE2G1;NDUFV3;COX7A1;UBE2L3;SNCA
Generation of second messenger molecules	3/36	0.751028	0.855477	0.76518	0.219081	WAS;LCP2;PAK2
Arachidonic acid metabolism	5/58	0.751073	0.855477	0.793914	0.22726	GPX1;ALOX5;AKR1C3;PLA2G4A;PTGS2
Phase I of biological oxidations: functionalization of compounds	6/69	0.754323	0.858455	0.801404	0.225943	CYP27B1;CYP26A1;SMOX;CYP4B1;CYP46A1;PTGS2
Pancreatic secretion	9/101	0.757562	0.859142	0.823007	0.228508	BST1;ITPR1;ATP2B4;ATP2A2;PLA2G4A;ATP1B3;ADCY2;ATP1A1;RHOA
Ck1/Cdk5 regulation by type 1 glutamate receptors	2/25	0.760144	0.859142	0.731976	0.200743	PPP2CA;CSNK1D
Glutathione conjugation	2/25	0.760144	0.859142	0.731976	0.200743	MGST1;GCLM
Maturity onset diabetes of the young	2/25	0.760144	0.859142	0.731976	0.200743	NR5A2;HES1
N-glycan biosynthesis	4/48	0.764201	0.859142	0.765069	0.205746	DPAGT1;B4GALT3;MGAT4A;MAN1A1
Hedgehog signaling pathway	6/70	0.766557	0.859142	0.788837	0.209709	GSK3B;BMP2;WNT2B;ARL13B;CSNK1A1;CSNK1D
Activation of DNA fragmentation factor	1/13	0.767597	0.859142	0.701579	0.18556	CASP3
Angiotensin-converting enzyme 2 regulation of heart function	1/13	0.767597	0.859142	0.701579	0.18556	COL4A1
Arylsulfatase activation	1/13	0.767597	0.859142	0.701579	0.18556	STS
CTL mediated immune response against target cells	1/13	0.767597	0.859142	0.701579	0.18556	ICAM1
Chondroitin sulfate/dermatan sulfate degradation	1/13	0.767597	0.859142	0.701579	0.18556	IDS
Cytosolic sulfonation of small molecules	1/13	0.767597	0.859142	0.701579	0.18556	PAPSS2
Downregulation of ERBB2-ERBB3 signaling	1/13	0.767597	0.859142	0.701579	0.18556	UBC
Lck and Fyn tyrosine kinases in initiation of T cell receptor activation	1/13	0.767597	0.859142	0.701579	0.18556	FYN
N-glycan trimming in the ER and calnexin/calreticulin cycle	1/13	0.767597	0.859142	0.701579	0.18556	UGGT1
Organic anion transporters	1/13	0.767597	0.859142	0.701579	0.18556	SLC22A12
PI3K class IB pathway	1/13	0.767597	0.859142	0.701579	0.18556	NRAS
Sulfur metabolism	1/13	0.767597	0.859142	0.701579	0.18556	PAPSS2
T helper cell surface molecules	1/13	0.767597	0.859142	0.701579	0.18556	ICAM1
Activation of NMDA receptor upon glutamate binding and postsynaptic events	3/37	0.767636	0.859142	0.742633	0.196382	RPS6KA3;MAPK1;CALM1
Signaling by GPCR	97/977	0.777119	0.867787	0.924745	0.233185	OR1K1;RGS4;RPS6KA3;RGS2;CYSLTR1;EDNRB;PPP2R1B;RGS1;PROK2;LHCGR;MAP2K1;PRKCQ;DGKH;C5AR1;FPR1;ITPR1;LPAR2;FPR2;PIK3R1;ADRB2;HCAR2;HCAR3;GNG10;TBXA2R;TAC1;OR5H6;FZD5;PPBP;GNRH2;GRB2;CALM1;CXCL8;WNT2B;YWHAB;ADM;CXCL1;CXCL2;CX3CL1;CXCL5;AKAP13;GPR132;PPP3CC;BDKRB2;PDE4B;BDKRB1;CCR7;FFAR2;ANXA1;PLEKHG2;TRPC6;PDE4D;MMP3;PLA2G4A;GPBAR1;RHOC;ADRA2A;RHOA;RHOB;ARHGEF1;SOS1;HBEGF;PTGER4;RGS18;NPB;OR2G3;PTGER…
Amino acid and oligopeptide SLC transporters	4/49	0.778287	0.867787	0.748026	0.1875	SLC7A5;SLC16A10;SLC7A1;SLC38A2
Acyl chain remodelling of phosphatidylcholine	2/26	0.779211	0.867787	0.701438	0.17499	PNPLA8;PLA2G4A
Estrogen receptor transcription factor targets	2/26	0.779211	0.867787	0.701438	0.17499	DDX5;TAF5L
Termination of O-glycan biosynthesis	2/26	0.779211	0.867787	0.701438	0.17499	MUC1;ST3GAL1
Tetrasaccharide linker sequence formation in glycosaminoglycan biosynthesis	2/26	0.779211	0.867787	0.701438	0.17499	SDC4;GPC1
Clathrin derived vesicle budding	5/61	0.789515	0.875136	0.751256	0.177549	HSPA8;RAB5C;PIK3C2A;TPD52L1;PICALM
Cytochrome P450 pathway	5/61	0.789515	0.875136	0.751256	0.177549	CYP27B1;CYP26A1;POR;CYP4B1;CYP46A1
Ion channel transport	5/61	0.789515	0.875136	0.751256	0.177549	ATP2B4;ATP2A2;ATP1B3;ATP1A1;ATP2C1
Acetylcholine binding and downstream events	1/14	0.792283	0.875136	0.647575	0.150779	CHRNA6
Glycogen breakdown (glycogenolysis)	1/14	0.792283	0.875136	0.647575	0.150779	CALM1
HIV-1 early elongation complex formation	1/14	0.792283	0.875136	0.647575	0.150779	NCBP2
Lectin-induced complement pathway	1/14	0.792283	0.875136	0.647575	0.150779	C4A
Retrograde neurotrophin signaling	1/14	0.792283	0.875136	0.647575	0.150779	NGF
Signaling by NOTCH2	1/14	0.792283	0.875136	0.647575	0.150779	NOTCH3
TRAF3-dependent IRF activation pathway	1/14	0.792283	0.875136	0.647575	0.150779	IRF7
Glucuronidation	2/27	0.796935	0.878838	0.673343	0.152837	UGDH;HK1
Kinesins	2/27	0.796935	0.878838	0.673343	0.152837	KIF5B;KLC1
Iron uptake and transport	3/39	0.798134	0.879443	0.701297	0.158128	ATP6V1G2;HMOX1;ATP6V0A4
Metabolism of vitamins and cofactors	4/51	0.80445	0.885681	0.716115	0.155824	SLC5A6;NAMPT;NMNAT2;SLC19A2
Neuronal system	26/283	0.809857	0.886471	0.850056	0.179275	CHRNA6;GNAI3;ADCY2;COMT;STX11;PANX1;RPS6KA3;PANX2;GNG10;GNG2;GNG5;MYO6;STX5;MAPK1;KCNN2;STX2;SLC38A2;KCNJ2;HSPA8;KCNB1;CACNA2D1;KCNJ15;GAD2;KCNAB1;SYN2;CALM1
PAC1 receptor pathway	3/40	0.812082	0.886471	0.682305	0.142025	PLCZ1;ADCY2;PRKCQ
Pyruvate metabolism and citric acid (TCA) cycle	3/40	0.812082	0.886471	0.682305	0.142025	LDHA;SLC16A3;IDH3A
Dual incision reaction in TC-NER	2/28	0.813386	0.886471	0.647409	0.133722	POLR2D;POLR2L
BMP signaling pathway in stem cells	1/15	0.814347	0.886471	0.601286	0.123485	MSX1
Bile acid and bile salt biosynthesis via 7-alpha-hydroxycholesterol	1/15	0.814347	0.886471	0.601286	0.123485	SCP2
Coagulation intrinsic pathway	1/15	0.814347	0.886471	0.601286	0.123485	VWF
Cyclin A/B1-associated events during G2/M transition	1/15	0.814347	0.886471	0.601286	0.123485	WEE1
Cytochrome P450 metabolism of endogenous sterols	1/15	0.814347	0.886471	0.601286	0.123485	CYP46A1
Mechanisms of transcriptional repression by DNA methylation	1/15	0.814347	0.886471	0.601286	0.123485	MTA2
Messenger RNA decay by 5' to 3' exoribonuclease	1/15	0.814347	0.886471	0.601286	0.123485	DCP1A
PRC2 complex long-term gene silencing through modification of histone tails	1/15	0.814347	0.886471	0.601286	0.123485	EZH2
Prolactin receptor signaling pathway	1/15	0.814347	0.886471	0.601286	0.123485	PTPN11
Validated nuclear estrogen receptor beta network	1/15	0.814347	0.886471	0.601286	0.123485	DDX54
Heparan sulfate/heparin glycosaminoglycan (HS-GAG) metabolism	4/52	0.81656	0.887451	0.701156	0.142093	SDC4;GLB1;GPC1;IDS
Pyruvate metabolism	4/52	0.81656	0.887451	0.701156	0.142093	LDHA;ACYP2;HAGH;SLC16A3
Glycolysis and gluconeogenesis	6/75	0.820963	0.89152	0.73147	0.144302	LDHA;PGAM1;ALDOC;ALDOB;ALDOA;HK1
Lipoprotein metabolism	2/29	0.828634	0.897687	0.623396	0.117184	SAR1B;LDLR
Statin pathway	2/29	0.828634	0.897687	0.623396	0.117184	SQLE;LDLR
Transferrin endocytosis and recycling	2/29	0.828634	0.897687	0.623396	0.117184	ATP6V1G2;ATP6V0A4
Retinol metabolism	5/65	0.833362	0.897819	0.701015	0.127786	CYP26A1;RETSAT;ALDH1A2;RDH10;RDH5
Amine-derived hormones	1/16	0.834069	0.897819	0.561169	0.101818	DIO2
Amino acid biosynthesis and interconversion (transamination)	1/16	0.834069	0.897819	0.561169	0.101818	PSAT1
Glutamate neurotransmitter release cycle	1/16	0.834069	0.897819	0.561169	0.101818	SLC38A2
Glyoxylate and dicarboxylate metabolism	1/16	0.834069	0.897819	0.561169	0.101818	MTHFD2
LPA4-mediated signaling events	1/16	0.834069	0.897819	0.561169	0.101818	ADCY2
Pantothenate and CoA biosynthesis	1/16	0.834069	0.897819	0.561169	0.101818	VNN2
SREBF and miR-33 in cholesterol and lipid homeostasis	1/16	0.834069	0.897819	0.561169	0.101818	LDLR
Potassium channels	8/99	0.837723	0.901035	0.739293	0.130905	GNG10;GNG2;GNG5;KCNB1;KCNJ15;KCNN2;KCNAB1;KCNJ2
Activation of the pre-replicative complex	2/30	0.84275	0.902136	0.601098	0.102839	CDK2;CDC7
Butanoate metabolism	2/30	0.84275	0.902136	0.601098	0.102839	EHHADH;GAD2
Heparan sulfate/heparin glycosaminoglycan (HS-GAG) biosynthesis	2/30	0.84275	0.902136	0.601098	0.102839	SDC4;GPC1
Retinoic acid receptor-mediated signaling	2/30	0.84275	0.902136	0.601098	0.102839	RARA;MAPK1
TRAF6-mediated IRF7 activation	2/30	0.84275	0.902136	0.601098	0.102839	IRF1;IRF7
Tight junction interactions	2/30	0.84275	0.902136	0.601098	0.102839	PARD6A;CLDN15
G2/M checkpoints	3/43	0.849106	0.903841	0.631026	0.103218	WEE1;CDK2;CDC7
Acyl chain remodelling of phosphatidylserine	1/17	0.851696	0.903841	0.526066	0.0844468	PLA2G4A
Branched-chain amino acid catabolism	1/17	0.851696	0.903841	0.526066	0.0844468	HIBCH
Chromatin remodeling by hSWI/SNF ATP-dependent complexes	1/17	0.851696	0.903841	0.526066	0.0844468	GTF2B
Dendritic cells in regulating TH1 and TH2 development	1/17	0.851696	0.903841	0.526066	0.0844468	CSF2
Destabilization of mRNA by KSRP	1/17	0.851696	0.903841	0.526066	0.0844468	EXOSC3
G1/S-specific transcription	1/17	0.851696	0.903841	0.526066	0.0844468	TFDP1
Glycosylphosphatidylinositol (GPI) biosynthesis	1/17	0.851696	0.903841	0.526066	0.0844468	PIGA
Phenylalanine metabolism	1/17	0.851696	0.903841	0.526066	0.0844468	AOC2
Renin-angiotensin system	1/17	0.851696	0.903841	0.526066	0.0844468	LNPEP
Sulfation biotransformation reaction	1/17	0.851696	0.903841	0.526066	0.0844468	PAPSS2
One-carbon metabolism	2/31	0.855801	0.906774	0.580338	0.0903684	MTHFD2;GART
PD-1 signaling	2/31	0.855801	0.906774	0.580338	0.0903684	CD274;PTPN11
Lysine degradation	3/44	0.859953	0.909747	0.615601	0.0928802	EHHADH;DOT1L;PLOD2
NCAM1 interactions	3/44	0.859953	0.909747	0.615601	0.0928802	COL4A1;ST8SIA4;NCAM1
Cardiac muscle contraction	6/80	0.8648	0.913392	0.681855	0.099044	TPM3;CACNA2D1;ATP2A2;ATP1B3;ATP1A1;COX7A1
MHC class II antigen presentation	8/103	0.867428	0.913392	0.708005	0.100694	ACTR1A;SAR1B;CTSL;KIF5B;KLC1;DYNLL1;DYNLL2;DYNC1I1
CDK regulation of DNA replication	1/18	0.867452	0.913392	0.495093	0.0703998	CDK2
Fatty acyl-CoA biosynthesis	1/18	0.867452	0.913392	0.495093	0.0703998	ACSL4
PKA activation in glucagon signaling	1/18	0.867452	0.913392	0.495093	0.0703998	ADCY2
Phosphatidylcholine biosynthesis	1/18	0.867452	0.913392	0.495093	0.0703998	PEMT
Defensins	3/45	0.870109	0.915477	0.60091	0.0836084	DEFB103A;DEFA3;DEFA1
Class C GPCRs (metabotropic glutamate and pheromone receptors)	1/19	0.881535	0.926057	0.467562	0.0589554	GPRC5A
Ras activation upon calcium influx through NMDA receptor	1/19	0.881535	0.926057	0.467562	0.0589554	CALM1
Meiosis	6/83	0.886547	0.930599	0.655179	0.0788973	MSH5;LMNA;CDK2;RBBP8;REC8;LMNB1
Translation	12/151	0.888872	0.931273	0.725409	0.0854543	EEF1B2;EIF4A1;SRP19;RPL7A;EIF5;EIF3I;EIF3J;ETF1;RPL29;EIF2S1;RPL6;EIF4G1
Class B GPCRs (secretin family receptors)	7/95	0.889256	0.931273	0.668731	0.0784892	GNG10;WNT2B;GNG2;GNG5;FZD5;ADM;CD55
Transport of inorganic cations/anions and amino acids/oligopeptides	7/95	0.889256	0.931273	0.668731	0.0784892	SLC7A5;SLC9A4;SLC20A1;SLC4A1;SLC16A10;SLC7A1;SLC38A2
Huntington's disease	15/184	0.890247	0.93159	0.745596	0.0866799	HIP1;GPX1;ITPR1;SOD2;COX7A1;CASP9;CASP3;CREB3L2;POLR2D;CYCS;VDAC1;NDUFV3;TGM2;CREB5;POLR2L
Golgi-associated vesicle biogenesis	1/20	0.894121	0.93492	0.442929	0.0495698	HSPA8
Lipid digestion, mobilization, and transport	3/48	0.89677	0.936966	0.560755	0.0610973	SAR1B;ABHD5;LDLR
Ether lipid metabolism	2/35	0.898667	0.938222	0.50988	0.054477	PLA2G4A;PAFAH1B2
Biosynthesis of unsaturated fatty acids	1/21	0.905372	0.943037	0.420759	0.0418276	ACOX1
ChREBP regulation by carbohydrates and cAMP	1/21	0.905372	0.943037	0.420759	0.0418276	PPP2CA
Mitochondrial tRNA aminoacylation	1/21	0.905372	0.943037	0.420759	0.0418276	2002-03-01
Steroid hormone, vitamin A, and vitamin D metabolism	2/36	0.907351	0.944372	0.494855	0.0481125	HSD11B1;CYP27B1
Allograft rejection	2/37	0.915335	0.951949	0.48069	0.0425242	CD86;TNF
Progesterone-initiated oocyte maturation	1/23	0.924414	0.958441	0.382465	0.03006	MAPK1
Signaling events mediated by the hedgehog family	1/23	0.924414	0.958441	0.382465	0.03006	PIK3R1
Visual signal transduction: cones	1/23	0.924414	0.958441	0.382465	0.03006	RDH5
Visual signal transduction: rods	1/23	0.924414	0.958441	0.382465	0.03006	RDH5
Aurora B signaling	2/39	0.9294	0.962873	0.454656	0.0332879	NSUN2;RHOA
Cytosolic tRNA aminoacylation	1/24	0.932446	0.96321	0.365816	0.0255865	PPA1
Lysosome vesicle biogenesis	1/24	0.932446	0.96321	0.365816	0.0255865	HSPA8
Protein export	1/24	0.932446	0.96321	0.365816	0.0255865	SRP19
Neuroactive ligand-receptor interaction	22/272	0.932575	0.96321	0.738304	0.0515377	PTGER4;P2RY13;LHCGR;PTGER2;PTAFR;C5AR1;CHRNA6;FPR1;LPAR2;FPR2;ADRB2;ADRA2A;CYSLTR1;EDNRB;TBXA2R;P2RY2;LEP;BDKRB2;S1PR1;CHRNA10;BDKRB1;S1PR4
Meiotic recombination	3/54	0.935813	0.965305	0.494617	0.0328125	MSH5;CDK2;RBBP8
Metapathway biotransformation	13/174	0.936031	0.965305	0.677955	0.044817	NNMT;MGST1;AKR1C3;AKR1C2;CYP4B1;KCNAB1;GLYAT;COMT;CYP46A1;CYP27B1;CYP26A1;CHST2;CHST3
AMPK signaling	4/68	0.939575	0.966249	0.525395	0.0327465	CDKN1A;PFKFB3;LEP;PIK3R1
Meiotic synapsis	3/55	0.940809	0.966249	0.485078	0.0295972	LMNA;REC8;LMNB1
RNA polymerase I transcription	3/55	0.940809	0.966249	0.485078	0.0295972	RRN3;TAF1B;POLR1C
Vibrio cholerae infection	3/55	0.940809	0.966249	0.485078	0.0295972	ATP6V1G2;ATP6V0A4;TJP2
Insulin biosynthesis and processing	2/41	0.941235	0.966249	0.431291	0.02612	SRP19;KIF5B
Tyrosine metabolism	2/41	0.941235	0.966249	0.431291	0.02612	AOC2;COMT
Ascorbate and aldarate metabolism	1/26	0.946042	0.967897	0.336513	0.0186657	UGDH
CARM1 and regulation of the estrogen receptor	1/26	0.946042	0.967897	0.336513	0.0186657	CCND1
Glycosaminoglycan biosynthesis: heparan sulfate	1/26	0.946042	0.967897	0.336513	0.0186657	XYLT1
RNA polymerase I, RNA polymerase III, and mitochondrial transcription	6/95	0.946258	0.967897	0.566458	0.0312911	RRN3;TAF1B;POLR3D;POLR1C;TFB2M;POLR2L
Amine ligand-binding G-protein coupled receptors	2/42	0.94642	0.967897	0.420486	0.0231556	ADRB2;ADRA2A
Voltage-gated potassium channels	2/43	0.951167	0.971905	0.410207	0.0205372	KCNB1;KCNAB1
RORA activates circadian expression	1/27	0.951777	0.971905	0.323552	0.0159914	HELZ2
Tryptophan metabolism	3/58	0.953713	0.973147	0.458542	0.0217317	ALDH1A2;EHHADH;IDO1
Valine, leucine and isoleucine degradation	2/44	0.955511	0.974246	0.400418	0.0182228	EHHADH;HIBCH
Histidine metabolism	1/29	0.961484	0.978123	0.300407	0.0117993	HAL
Pentose and glucuronate interconversions	1/29	0.961484	0.978123	0.300407	0.0117993	UGDH
Phototransduction	1/29	0.961484	0.978123	0.300407	0.0117993	CALM1
Transfer RNA aminoacylation	2/46	0.963113	0.979044	0.382174	0.0143637	PPA1;MARS2
Asthma	1/30	0.965578	0.980076	0.290032	0.0101594	TNF
Glutamate binding and activation of AMPA receptors and synaptic plasticity	1/30	0.965578	0.980076	0.290032	0.0101594	MYO6
Complement cascade	4/77	0.969482	0.983301	0.460388	0.0142689	C4A;CFH;CD46;CD55
Amyloids	2/51	0.977045	0.990159	0.34308	0.00796733	SAA1;SNCA
Cytoplasmic ribosomal proteins	6/108	0.977709	0.990159	0.493901	0.0111344	RPS6KA3;RPL7A;EIF3I;EIF3J;RPL29;RPL6
Autophagy regulation	1/35	0.980377	0.991316	0.247311	0.00490129	GABARAPL1
Linoleic acid metabolism	1/35	0.980377	0.991316	0.247311	0.00490129	PLA2G4A
Starch and sucrose metabolism	2/53	0.981051	0.991316	0.329589	0.00630526	UGDH;HK1
Systemic lupus erythematosus	8/139	0.984227	0.993782	0.5124	0.00814672	CD86;C4A;FCGR2A;ACTN4;FCGR1A;TNF;TRIM21;SNRPB
Tricarboxylic acid (TCA) cycle	1/39	0.987484	0.996327	0.221229	0.00278647	IDH3A
Nucleotide excision repair	2/58	0.988323	0.99643	0.300077	0.00352471	POLR2D;POLR2L
DNA repair	5/105	0.989794	0.99717	0.419665	0.00430496	UBE2T;UBC;POLR2D;FANCB;POLR2L
Deposition of new CENP-A-containing nucleosomes at the centromere	1/45	0.993625	0.999445	0.190997	0.00122158	CENPN
Drug metabolism: cytochrome P450	3/83	0.994757	0.999445	0.314805	0.00165478	MGST1;AKR1C3;AKR1C2
Tricarboxylic acid (TCA) cycle and respiratory electron transport	5/117	0.99606	0.999445	0.374448	0.00147825	LDHA;CYCS;NDUFV3;SLC16A3;IDH3A
Chromosome maintenance	4/103	0.996394	0.999445	0.338982	0.00122466	LMNA;CENPN;REC8;LMNB1
Autoimmune thyroid disease	1/52	0.997098	0.999445	0.164717	0.000478717	CD86
Taste transduction	1/52	0.997098	0.999445	0.164717	0.000478717	KCNB1
Oxidative phosphorylation	6/136	0.997227	0.999445	0.386912	0.00107425	ATP6V1G2;PPA1;ATP6V0A4;NDUFV3;COX7A1;LHPP
Respiratory electron transport, ATP biosynthesis by chemiosmotic coupling, and heat production by uncoupling proteins	2/81	0.998817	0.999995	0.212439	0.000251486	CYCS;NDUFV3
Electron transport chain	2/105	0.999897	0.999995	0.162719	1.68317e-05	NDUFV3;COX7A1
Olfactory transduction	5/432	0.999995	0.999995	0.0964743	5.12874e-07	OR51E1;OR2G3;OR1K1;CALM1;OR5H6
