# Supplementary material for: Transcriptome of Subcutaneous Adipose Tissue reflect Membrane Dysfunction and Impaired Oxidative Processes in T2D across Heterogenous Populations
Source: Research Square preprint supplement (doi:10.21203/rs.3.rs-7053974/v1), 2025-11-14
Supplement: Supplementary file 11 [file da4b032647b245aeee1cb3c7.xlsx]

## Sheet: Gene names and Protein names
Gene symbols	Association ID in cohort 1 and 2	Association ID in cohort 3	Ensemble ID	Protein names
ABCC9	ILMN_1751453	11758382_s_at	ENSG00000069431	ATP binding cassette subfamily C member 9
ABCC9	ILMN_2366473	11758382_s_at	ENSG00000069431	ATP binding cassette subfamily C member 9
ABHD5	ILMN_1655702	11723706_at	ENSG00000011198	abhydrolase domain containing 5, lysophosphatidic acid acyltransferase
ACAT1	ILMN_1800008	11742973_at	ENSG00000075239	acetyl-CoA acetyltransferase 1
ACOX1	ILMN_1750158	11726322_at	ENSG00000161533	acyl-CoA oxidase 1
ACOX1	ILMN_1750158	11726323_a_at	ENSG00000161533	acyl-CoA oxidase 1
ACOX1	ILMN_1765767	11726322_at	ENSG00000161533	acyl-CoA oxidase 1
ACOX1	ILMN_1765767	11726323_a_at	ENSG00000161533	acyl-CoA oxidase 1
ACSL4	ILMN_1683598	11719042_s_at	ENSG00000068366	acyl-CoA synthetase long chain family member 4
ACSL4	ILMN_1691714	11719042_s_at	ENSG00000068366	acyl-CoA synthetase long chain family member 4
ACVR1C	ILMN_1689217	11733619_a_at	ENSG00000123612	activin A receptor type 1C
ANG	ILMN_2294978	11718988_s_at	ENSG00000214274	angiogenin
ANG	ILMN_2408572	11718988_s_at	ENSG00000214274	angiogenin
ATP5MF	ILMN_2307883	11725612_x_at	ENSG00000241468	ATP synthase membrane subunit f
ATP5MF	ILMN_2307883	11743715_x_at	ENSG00000241468	ATP synthase membrane subunit f
ATP5MF	ILMN_2307883	11753755_x_at	ENSG00000241468	ATP synthase membrane subunit f
ATP9B	ILMN_1658684	11745239_a_at	ENSG00000166377	ATPase phospholipid transporting 9B (putative)
C9orf72	ILMN_1666742	11720531_at	ENSG00000147894	C9orf72-SMCR8 complex subunit
CASZ1	ILMN_1655191	11728412_x_at	ENSG00000130940	castor zinc finger 1
CBR1	ILMN_1809003	11753302_s_at	ENSG00000159228	carbonyl reductase 1
CCDC62	ILMN_1663370	11731020_s_at	ENSG00000130783	coiled-coil domain containing 62
CCNC	ILMN_1676423	11726983_s_at	ENSG00000112237	cyclin C
CCNC	ILMN_1676423	11726984_a_at	ENSG00000112237	cyclin C
CCNC	ILMN_1798705	11726983_s_at	ENSG00000112237	cyclin C
CCNC	ILMN_1798705	11726984_a_at	ENSG00000112237	cyclin C
CERCAM	ILMN_1750563	11750886_x_at	ENSG00000167123	cerebral endothelial cell adhesion molecule
CFAP221	ILMN_1688126	11732658_a_at	ENSG00000163075	cilia and flagella associated protein 221
CFAP70	ILMN_1784516	11720171_s_at	ENSG00000156042	cilia and flagella associated protein 70
CHCHD3	ILMN_1673026	11757083_s_at	ENSG00000106554	coiled-coil-helix-coiled-coil-helix domain containing 3
CHCHD3	ILMN_1673026	11760429_at	ENSG00000106554	coiled-coil-helix-coiled-coil-helix domain containing 3
CHP1	ILMN_1779401	11754517_a_at	ENSG00000187446	calcineurin like EF-hand protein 1
CLEC18C	ILMN_1730964	11757562_s_at	ENSG00000157335	C-type lectin domain family 18 member C
CRLS1	ILMN_1737685	11726335_a_at	ENSG00000088766	cardiolipin synthase 1
CRLS1	ILMN_1737685	11726336_a_at	ENSG00000088766	cardiolipin synthase 1
CT45A10	ILMN_2402042	11734212_at	ENSG00000269586	cancer/testis antigen family 45 member A10
CYB5A	ILMN_2312194	11753740_x_at	ENSG00000166347	cytochrome b5 type A
CYB5A	ILMN_2312194	11754624_a_at	ENSG00000166347	cytochrome b5 type A
CYB5A	ILMN_2312194	11757320_x_at	ENSG00000166347	cytochrome b5 type A
CYB5A	ILMN_1714167	11753740_x_at	ENSG00000166347	cytochrome b5 type A
CYB5A	ILMN_1714167	11754624_a_at	ENSG00000166347	cytochrome b5 type A
CYB5A	ILMN_1714167	11757320_x_at	ENSG00000166347	cytochrome b5 type A
CYP4F3	ILMN_2089484	11759103_at	ENSG00000186529	cytochrome P450 family 4 subfamily F member 3
DCUN1D4	ILMN_2389429	11720951_a_at	ENSG00000109184	defective in cullin neddylation 1 domain containing 4
DDT	ILMN_1690982	11760188_x_at	ENSG00000099977	D-dopachrome tautomerase
DENND2B	ILMN_1692207	11749288_a_at	ENSG00000166444	DENN domain containing 2B
DPM1	ILMN_2105308	11754523_a_at	ENSG00000000419	dolichyl-phosphate mannosyltransferase subunit 1, catalytic
EGLN1	ILMN_1749892	11733856_s_at	ENSG00000135766	egl-9 family hypoxia inducible factor 1
FAM227B	ILMN_1795984	11760363_at	ENSG00000166262	family with sequence similarity 227 member B
GABRB2	ILMN_1798046	11761751_at	ENSG00000145864	gamma-aminobutyric acid type A receptor subunit beta2
GNA12	ILMN_1692191	11751417_a_at	ENSG00000146535	G protein subunit alpha 12
GPX1	ILMN_1749662	11725346_x_at	ENSG00000233276	glutathione peroxidase 1
GPX1	ILMN_1787412	11725346_x_at	ENSG00000233276	glutathione peroxidase 1
GPX1P1	ILMN_1749662	11725346_x_at	ENSG00000197582	glutathione peroxidase pseudogene 1
GTF2E2	ILMN_1664931	11716510_at	ENSG00000197265	general transcription factor IIE subunit 2
H2AC18	ILMN_2144426	11742657_x_at	ENSG00000288825	H2A clustered histone 18
H2AC19	ILMN_2144426	11742657_x_at	ENSG00000288859	H2A clustered histone 19
HTR3A	ILMN_1662070	11739827_a_at	ENSG00000166736	5-hydroxytryptamine receptor 3A
KIF19	ILMN_1727833	11734242_x_at	ENSG00000196169	kinesin family member 19
LPL	ILMN_1786444	11718972_at	ENSG00000175445	lipoprotein lipase
LPL	ILMN_1786444	11718974_at	ENSG00000175445	lipoprotein lipase
MAGEA8	ILMN_2069915	11731040_at	ENSG00000156009	MAGE family member A8
MED7	ILMN_2229170	11741446_s_at	ENSG00000155868	mediator complex subunit 7
MMP16	ILMN_1791796	11736865_a_at	ENSG00000156103	matrix metallopeptidase 16
MRNIP	ILMN_2409879	11760338_at	ENSG00000161010	MRN complex interacting protein
MTERF4	ILMN_1689899	11742965_a_at	ENSG00000122085	mitochondrial transcription termination factor 4
NEDD4L	ILMN_1733627	11758571_s_at	ENSG00000049759	NEDD4 like E3 ubiquitin protein ligase
NAA50	ILMN_2180606	11721799_s_at	ENSG00000121579	N-alpha-acetyltransferase 50, NatE catalytic subunit
ORMDL3	ILMN_1662174	11736188_a_at	ENSG00000172057	ORMDL sphingolipid biosynthesis regulator 3
PBLD	ILMN_1760748	11732326_x_at	ENSG00000108187	phenazine biosynthesis like protein domain containing
PCNX1	ILMN_1740010	11722107_at	ENSG00000100731	pecanex 1
PCNX1	ILMN_1740010	11722108_at	ENSG00000100731	pecanex 1
PEG10	ILMN_2297626	11718359_a_at	ENSG00000242265	paternally expressed 10
PGM1	ILMN_1800659	11748423_a_at	ENSG00000079739	phosphoglucomutase 1
PGM1	ILMN_1800659	11756127_a_at	ENSG00000079739	phosphoglucomutase 1
PLAC1	ILMN_1754207	11722315_a_at	ENSG00000170965	placenta enriched 1
PLAC4	ILMN_1654466	11727073_a_at	ENSG00000280109	placenta enriched 4
PLAC4	ILMN_1654466	11727076_x_at	ENSG00000280109	placenta enriched 4
PLOD2	ILMN_1799139	11721333_a_at	ENSG00000152952	procollagen-lysine,2-oxoglutarate 5-dioxygenase 2
PLOD2	ILMN_1799139	11721334_a_at	ENSG00000152952	procollagen-lysine,2-oxoglutarate 5-dioxygenase 2
PLOD2	ILMN_1799139	11721335_x_at	ENSG00000152952	procollagen-lysine,2-oxoglutarate 5-dioxygenase 2
PLOD2	ILMN_1799139	11748610_a_at	ENSG00000152952	procollagen-lysine,2-oxoglutarate 5-dioxygenase 2
PLOD2	ILMN_1771599	11721333_a_at	ENSG00000152952	procollagen-lysine,2-oxoglutarate 5-dioxygenase 2
PLOD2	ILMN_1771599	11721334_a_at	ENSG00000152952	procollagen-lysine,2-oxoglutarate 5-dioxygenase 2
PLOD2	ILMN_1771599	11721335_x_at	ENSG00000152952	procollagen-lysine,2-oxoglutarate 5-dioxygenase 2
PLOD2	ILMN_1771599	11748610_a_at	ENSG00000152952	procollagen-lysine,2-oxoglutarate 5-dioxygenase 2
PLAAT3	ILMN_1667711	11721665_a_at	ENSG00000176485	phospholipase A and acyltransferase 3
PPA2	ILMN_1687785	11747013_a_at	ENSG00000138777	inorganic pyrophosphatase 2
PRKN	ILMN_1714511	11758324_s_at	ENSG00000185345	parkin RBR E3 ubiquitin protein ligase
PSMB5	ILMN_1744649	11732666_s_at	ENSG00000100804	proteasome 20S subunit beta 5
PSMD12	ILMN_2368971	11739251_a_at	ENSG00000197170	proteasome 26S subunit, non-ATPase 12
PTGER3	ILMN_1677384	11735112_at	ENSG00000050628	prostaglandin E receptor 3
PTGER3	ILMN_2353110	11735112_at	ENSG00000050628	prostaglandin E receptor 3
QKI	ILMN_1773485	11722454_s_at	ENSG00000112531	QKI, KH domain containing RNA binding
QKI	ILMN_2336280	11722454_s_at	ENSG00000112531	QKI, KH domain containing RNA binding
R3HDM1	ILMN_2052383	11737799_s_at	ENSG00000048991	R3H domain containing 1
RAB1A	ILMN_2118864	11717723_s_at	ENSG00000138069	RAB1A, member RAS oncogene family
RAD54B	ILMN_1669745	11728447_at	ENSG00000197275	RAD54 homolog B
RFFL	ILMN_1743356	11763631_at	ENSG00000092871	ring finger and FYVE like domain containing E3 ubiquitin protein ligase
RHOA	ILMN_1749662	11725346_x_at	ENSG00000067560	ras homolog family member A
RHOA	ILMN_1787412	11725346_x_at	ENSG00000067560	ras homolog family member A
RNASE4	ILMN_2408572	11718988_s_at	ENSG00000258818	ribonuclease A family member 4
SCN3B	ILMN_1700328	11726423_a_at	ENSG00000166257	sodium voltage-gated channel beta subunit 3
SLC38A8	ILMN_2284077	11743206_at	ENSG00000166558	solute carrier family 38 member 8
STRN3	ILMN_1772946	11737168_a_at	ENSG00000196792	striatin 3
STRN3	ILMN_1772946	11743882_a_at	ENSG00000196792	striatin 3
TOMM70	ILMN_1746426	11757770_s_at	ENSG00000154174	translocase of outer mitochondrial membrane 70
UBE2J2	ILMN_2387990	11729616_a_at	ENSG00000160087	ubiquitin conjugating enzyme E2 J2
UBXN8	ILMN_1731891	11755633_a_at	ENSG00000104691	UBX domain protein 8
ZC3H15	ILMN_2062112	11752239_a_at	ENSG00000065548	zinc finger CCCH-type containing 15

## Sheet: Unique Genes
ABCC9
ABHD5
ACAT1
ACOX1
ACSL4
ACVR1C
ANG
ATP5MF
ATP9B
C9orf72
CASZ1
CBR1
CCDC62
CCNC
CERCAM
CFAP221
CFAP70
CHCHD3
CHP1
CLEC18C
CRLS1
CT45A10
CYB5A
CYP4F3
DCUN1D4
DDT
DENND2B
DPM1
EGLN1
FAM227B
GABRB2
GNA12
GPX1
GPX1P1
GTF2E2
H2AC18
H2AC19
HTR3A
KIF19
LPL
MAGEA8
MED7
MMP16
MRNIP
MTERF4
NEDD4L
NAA50
ORMDL3
PBLD
PCNX1
PEG10
PGM1
PLAC1
PLAC4
PLOD2
PLAAT3
PPA2
PRKN
PSMB5
PSMD12
PTGER3
QKI
R3HDM1
RAB1A
RAD54B
RFFL
RHOA
RNASE4
SCN3B
SLC38A8
STRN3
TOMM70
UBE2J2
UBXN8
ZC3H15

## Sheet: Reactome
Term	Overlap	P-value	Adjusted p-value	Odds Ratio	Combined Score	Genes
Metabolism Of Lipids R-HSA-556833	11/732	8.48602e-05	0.0347078	4.57793	42.9158	CBR1;GPX1;ACOX1;ORMDL3;CYP4F3;CCNC;ACSL4;PLAAT3;ABHD5;CRLS1;MED7
Protein Localization R-HSA-9609507	5/164	0.000378902	0.049462	8.8796	69.9556	TOMM70;CYB5A;CHCHD3;ACOX1;UBE2J2
Metabolism R-HSA-1430728	18/2049	0.000454164	0.049462	2.78224	21.4151	CBR1;CYB5A;PSMD12;GPX1;CYP4F3;LPL;CCNC;ACSL4;PLAAT3;ABHD5;CRLS1;MED7;PSMB5;PPA2;ACOX1;ORMDL3;PGM1;ATP5MF
Fatty Acid Metabolism R-HSA-8978868	5/173	0.000483736	0.049462	8.40009	64.126	CBR1;GPX1;ACOX1;CYP4F3;ACSL4
Deubiquitination R-HSA-5688426	6/279	0.000628149	0.0513826	6.2596	46.1503	TOMM70;PRKN;PSMD12;PSMB5;H2AC19;RHOA
Signaling By TGF-β Family Members R-HSA-9006936	4/119	0.00104567	0.0712795	9.70484	66.6053	ACVR1C;NEDD4L;CCNC;RHOA
Diseases Associated With Glycosylation Precursor Biosynthesis R-HSA-5609975	2/15	0.00141156	0.0723958	41.9642	275.413	DPM1;PGM1
Arachidonic Acid Metabolism R-HSA-2142753	3/59	0.00141606	0.0723958	14.7835	96.9779	CBR1;GPX1;CYP4F3
Oxygen-dependent Proline Hydroxylation Of Hypoxia-inducible Factor Alpha R-HSA-1234176	3/64	0.00179067	0.081376	13.5683	85.8218	EGLN1;PSMD12;PSMB5
Cellular Response To Hypoxia R-HSA-1234174	3/73	0.00260945	0.0960572	11.8185	70.3034	EGLN1;PSMD12;PSMB5
ABC Transporter Disorders R-HSA-5619084	3/77	0.00303635	0.0960572	11.1774	64.7963	PSMD12;PSMB5;ABCC9
PINK1-PRKN Mediated Mitophagy R-HSA-5205685	2/22	0.00305316	0.0960572	27.2671	157.92	PRKN;TOMM70
Insertion Of Tail-Anchored Proteins Into Endoplasmic Reticulum Membrane R-HSA-9609523	2/22	0.00305316	0.0960572	27.2671	157.92	CYB5A;UBE2J2
Transcriptional Regulation Of White Adipocyte Differentiation R-HSA-381340	3/84	0.00388178	0.113403	10.2078	56.6683	LPL;CCNC;MED7
PCP/CE Pathway R-HSA-4086400	3/88	0.00442303	0.116253	9.72549	52.7212	PSMD12;PSMB5;RHOA
Signaling By TGF-beta Receptor Complex R-HSA-170834	3/91	0.00485752	0.116253	9.39252	50.0361	NEDD4L;CCNC;RHOA
Mitophagy R-HSA-5205647	2/28	0.00492403	0.116253	20.9684	111.418	PRKN;TOMM70
Cristae Formation R-HSA-8949613	2/29	0.00527599	0.116253	20.1908	105.892	CHCHD3;ATP5MF
UCH Proteinases R-HSA-5689603	3/95	0.0054757	0.116253	8.98234	46.7749	PSMD12;PSMB5;H2AC19
Antigen Processing: Ubiquitination And Proteasome Degradation R-HSA-983168	5/307	0.00593075	0.116253	4.6412	23.7982	PRKN;PSMD12;PSMB5;NEDD4L;UBE2J2
RUNX1 Regulates Transcription Of Genes Involved In Differentiation Of HSCs R-HSA-8939236	3/98	0.00596897	0.116253	8.69737	44.5408	PSMD12;PSMB5;H2AC19
ABC-family Proteins Mediated Transport R-HSA-382556	3/102	0.00666687	0.121763	8.34428	41.8099	PSMD12;PSMB5;ABCC9
Ub-specific Processing Proteases R-HSA-5689880	4/201	0.00690403	0.121763	5.64181	28.0717	TOMM70;PSMD12;PSMB5;H2AC19
Signaling By NOTCH R-HSA-157118	4/203	0.00714502	0.121763	5.58454	27.5951	PSMD12;PSMB5;H2AC19;CCNC
Assembly Of Pre-Replicative Complex R-HSA-68867	3/110	0.00820335	0.132402	7.71729	37.0678	PSMD12;PSMB5;H2AC19
PPARA Activates Gene Expression R-HSA-1989781	3/116	0.00948152	0.132402	7.30531	34.0311	ACOX1;CCNC;MED7
Regulation Of Lipid Metabolism By PPARalpha R-HSA-400206	3/118	0.00993194	0.132402	7.17754	33.1028	ACOX1;CCNC;MED7
HIV Infection R-HSA-162906	4/229	0.0107972	0.132402	4.93271	22.3376	PSMD12;PSMB5;NEDD4L;GTF2E2
DNA Replication Pre-Initiation R-HSA-69002	3/127	0.0121119	0.132402	6.65356	29.366	PSMD12;PSMB5;H2AC19
Class I MHC Mediated Antigen Processing And Presentation R-HSA-983169	5/378	0.0137741	0.132402	3.74416	16.0436	PRKN;PSMD12;PSMB5;NEDD4L;UBE2J2
Cross-presentation Of Soluble Exogenous Antigens (Endosomes) R-HSA-1236978	2/48	0.0140017	0.132402	11.8398	50.5391	PSMD12;PSMB5
Regulation Of Activated PAK-2p34 By Proteasome Mediated Degradation R-HSA-211733	2/49	0.0145624	0.132402	11.5873	49.0063	PSMD12;PSMB5
Regulation Of Ornithine Decarboxylase (ODC) R-HSA-350562	2/50	0.0151327	0.132402	11.3453	47.547	PSMD12;PSMB5
Autodegradation Of E3 Ubiquitin Ligase COP1 R-HSA-349425	2/51	0.0157126	0.132402	11.1132	46.1565	PSMD12;PSMB5
GSK3B And BTRC:CUL1-mediated-degradation Of NFE2L2 R-HSA-9762114	2/51	0.0157126	0.132402	11.1132	46.1565	PSMD12;PSMB5
Transcriptional Activity Of SMAD2/SMAD3:SMAD4 Heterotrimer R-HSA-2173793	2/51	0.0157126	0.132402	11.1132	46.1565	NEDD4L;CCNC
Ubiquitin Mediated Degradation Of Phosphorylated Cdc25A R-HSA-69601	2/51	0.0157126	0.132402	11.1132	46.1565	PSMD12;PSMB5
Ubiquitin-dependent Degradation Of Cyclin D R-HSA-75815	2/51	0.0157126	0.132402	11.1132	46.1565	PSMD12;PSMB5
Vpu Mediated Degradation Of CD4 R-HSA-180534	2/51	0.0157126	0.132402	11.1132	46.1565	PSMD12;PSMB5
Regulation Of Apoptosis R-HSA-169911	2/52	0.0163018	0.132402	10.8904	44.8301	PSMD12;PSMB5
Beta-catenin Independent WNT Signaling R-HSA-3858494	3/142	0.0163115	0.132402	5.93106	24.4115	PSMD12;PSMB5;RHOA
Vif-mediated Degradation Of APOBEC3G R-HSA-180585	2/53	0.0169005	0.132402	10.6763	43.5639	PSMD12;PSMB5
Negative Regulation Of NOTCH4 Signaling R-HSA-9604323	2/53	0.0169005	0.132402	10.6763	43.5639	PSMD12;PSMB5
AUF1 (hnRNP D0) Binds And Destabilizes mRNA R-HSA-450408	2/54	0.0175084	0.132402	10.4705	42.354	PSMD12;PSMB5
Regulation Of RUNX3 Expression And Activity R-HSA-8941858	2/54	0.0175084	0.132402	10.4705	42.354	PSMD12;PSMB5
SCF-beta-TrCP Mediated Degradation Of Emi1 R-HSA-174113	2/54	0.0175084	0.132402	10.4705	42.354	PSMD12;PSMB5
Degradation Of AXIN R-HSA-4641257	2/54	0.0175084	0.132402	10.4705	42.354	PSMD12;PSMB5
FBXL7 Down-Regulates AURKA During Mitotic Entry And In Early Mitosis R-HSA-8854050	2/54	0.0175084	0.132402	10.4705	42.354	PSMD12;PSMB5
Degradation Of DVL R-HSA-4641258	2/55	0.0181255	0.132402	10.2724	41.1969	PSMD12;PSMB5
Hh Mutants Are Degraded By ERAD R-HSA-5362768	2/55	0.0181255	0.132402	10.2724	41.1969	PSMD12;PSMB5
Developmental Biology R-HSA-1266738	9/1073	0.0186391	0.132402	2.41725	9.62668	PSMD12;ACVR1C;PSMB5;H2AC19;LPL;CCNC;SCN3B;RHOA;MED7
Stabilization Of P53 R-HSA-69541	2/56	0.0187517	0.132402	10.0817	40.0895	PSMD12;PSMB5
Hh Mutants Abrogate Ligand Secretion R-HSA-5387390	2/58	0.0200313	0.132402	9.72065	38.0122	PSMD12;PSMB5
Metabolism Of Polyamines R-HSA-351202	2/58	0.0200313	0.132402	9.72065	38.0122	PSMD12;PSMB5
NIK To Noncanonical NF-kB Signaling R-HSA-5676590	2/58	0.0200313	0.132402	9.72065	38.0122	PSMD12;PSMB5
DNA Replication R-HSA-69306	3/155	0.0205338	0.132402	5.42023	21.0613	PSMD12;PSMB5;H2AC19
SCF(Skp2)-mediated Degradation Of P27/P21 R-HSA-187577	2/59	0.0206844	0.132402	9.54963	37.037	PSMD12;PSMB5
Degradation Of GLI1 By Proteasome R-HSA-5610780	2/59	0.0206844	0.132402	9.54963	37.037	PSMD12;PSMB5
Degradation Of GLI2 By Proteasome R-HSA-5610783	2/59	0.0206844	0.132402	9.54963	37.037	PSMD12;PSMB5
GLI3 Is Processed To GLI3R By Proteasome R-HSA-5610785	2/59	0.0206844	0.132402	9.54963	37.037	PSMD12;PSMB5
Role Of GTSE1 In G2/M Progression After G2 Checkpoint R-HSA-8852276	2/59	0.0206844	0.132402	9.54963	37.037	PSMD12;PSMB5
Defective CFTR Causes Cystic Fibrosis R-HSA-5678895	2/60	0.0213464	0.132402	9.38451	36.101	PSMD12;PSMB5
Dectin-1 Mediated Noncanonical NF-kB Signaling R-HSA-5607761	2/61	0.0220172	0.132402	9.22498	35.2019	PSMD12;PSMB5
Selective Autophagy R-HSA-9663891	2/61	0.0220172	0.132402	9.22498	35.2019	TOMM70;PRKN
Synthesis Of 15-Eicosatetraenoic Acid Derivatives R-HSA-2142770	1/6	0.0222927	0.132402	53.8378	204.772	GPX1
rRNA Modification In Mitochondrion R-HSA-6793080	1/6	0.0222927	0.132402	53.8378	204.772	MTERF4
Asymmetric Localization Of PCP Proteins R-HSA-4608870	2/62	0.0226966	0.132402	9.07078	34.3378	PSMD12;PSMB5
RHO GTPases Activate PKNs R-HSA-5625740	2/62	0.0226966	0.132402	9.07078	34.3378	H2AC19;RHOA
Autodegradation Of Cdh1 By Cdh1:APC/C R-HSA-174084	2/63	0.0233846	0.132402	8.92163	33.5067	PSMD12;PSMB5
Hedgehog Ligand Biogenesis R-HSA-5358346	2/64	0.0240812	0.132402	8.77729	32.707	PSMD12;PSMB5
Signaling By WNT R-HSA-195721	4/294	0.0246293	0.132402	3.81447	14.1281	PSMD12;PSMB5;H2AC19;RHOA
Regulation Of RAS By GAPs R-HSA-5658442	2/65	0.0247863	0.132402	8.63753	31.937	PSMD12;PSMB5
p53-Dependent G1 DNA Damage Response R-HSA-69563	2/65	0.0247863	0.132402	8.63753	31.937	PSMD12;PSMB5
Mitochondrial Protein Import R-HSA-1268020	2/65	0.0247863	0.132402	8.63753	31.937	TOMM70;CHCHD3
Activation Of NF-kappaB In B Cells R-HSA-1169091	2/66	0.0254997	0.132402	8.50214	31.1951	PSMD12;PSMB5
Synthesis Of 12-Eicosatetraenoic Acid Derivatives R-HSA-2142712	1/7	0.0259602	0.132402	44.8626	163.802	GPX1
TYSND1 Cleaves Peroxisomal Proteins R-HSA-9033500	1/7	0.0259602	0.132402	44.8626	163.802	ACOX1
Vitamin C (Ascorbate) Metabolism R-HSA-196836	1/7	0.0259602	0.132402	44.8626	163.802	CYB5A
APC/C:Cdc20 Mediated Degradation Of Securin R-HSA-174154	2/67	0.0262215	0.132402	8.37092	30.48	PSMD12;PSMB5
Regulation Of PTEN Stability And Activity R-HSA-8948751	2/67	0.0262215	0.132402	8.37092	30.48	PSMD12;PSMB5
G1/S DNA Damage Checkpoints R-HSA-69615	2/67	0.0262215	0.132402	8.37092	30.48	PSMD12;PSMB5
Orc1 Removal From Chromatin R-HSA-68949	2/69	0.0276897	0.136011	8.12022	29.1248	PSMD12;PSMB5
Disorders Of Transmembrane Transporters R-HSA-5619115	3/176	0.0285085	0.136011	4.75723	16.9241	PSMD12;PSMB5;ABCC9
Axonal Growth Inhibition (RHOA Activation) R-HSA-193634	1/8	0.0296141	0.136011	38.4517	135.331	RHOA
Sema4D Mediated Inhibition Of Cell Attachment And Migration R-HSA-416550	1/8	0.0296141	0.136011	38.4517	135.331	RHOA
CDK-mediated Phosphorylation And Removal Of Cdc6 R-HSA-69017	2/72	0.0299527	0.136011	7.77104	27.2619	PSMD12;PSMB5
Cdc20:Phospho-APC/C Mediated Degradation Of Cyclin A R-HSA-174184	2/72	0.0299527	0.136011	7.77104	27.2619	PSMD12;PSMB5
Regulation Of RUNX2 Expression And Activity R-HSA-8939902	2/72	0.0299527	0.136011	7.77104	27.2619	PSMD12;PSMB5
APC/C:Cdh1 Mediated Degradation Of Cdc20 And APC/C:Cdh1 Targets In Late Mitosis/Early G1 R-HSA-174178	2/73	0.0307229	0.136011	7.6612	26.682	PSMD12;PSMB5
APC:Cdc20 Mediated Degradation Of Cell Cycle Proteins Before Cycle Checkpoint Satisfied R-HSA-179419	2/73	0.0307229	0.136011	7.6612	26.682	PSMD12;PSMB5
Cellular Response To Chemical Stress R-HSA-9711123	3/182	0.0310484	0.136011	4.59637	15.9595	PSMD12;GPX1;PSMB5
APC/C:Cdc20 Mediated Degradation Of Mitotic Proteins R-HSA-176409	2/75	0.0322868	0.136011	7.45055	25.5785	PSMD12;PSMB5
Activation Of APC/C And APC/C:Cdc20 Mediated Degradation Of Mitotic Proteins R-HSA-176814	2/76	0.0330804	0.136011	7.3495	25.0531	PSMD12;PSMB5
Post-translational Protein Modification R-HSA-597592	10/1383	0.0332396	0.136011	2.07877	7.07617	TOMM70;DPM1;PRKN;RAB1A;PSMD12;PSMB5;DCUN1D4;H2AC19;UBE2J2;RHOA
PI3K/AKT Activation R-HSA-198203	1/9	0.0332545	0.136011	33.6436	114.508	RHOA
Prostanoid Ligand Receptors R-HSA-391908	1/9	0.0332545	0.136011	33.6436	114.508	PTGER3
RHO GTPases Activate Rhotekin And Rhophilins R-HSA-5666185	1/9	0.0332545	0.136011	33.6436	114.508	RHOA
Chylomicron Remodeling R-HSA-8963901	1/9	0.0332545	0.136011	33.6436	114.508	LPL
Synthesis Of 5-Eicosatetraenoic Acids R-HSA-2142688	1/9	0.0332545	0.136011	33.6436	114.508	GPX1
p75NTR Regulates Axonogenesis R-HSA-193697	1/9	0.0332545	0.136011	33.6436	114.508	RHOA
COPI-dependent Golgi-to-ER Retrograde Traffic R-HSA-6811434	2/78	0.0346903	0.136426	7.15537	24.0513	RAB1A;KIF19
FCERI Mediated NF-kB Activation R-HSA-2871837	2/78	0.0346903	0.136426	7.15537	24.0513	PSMD12;PSMB5
G Alpha (12/13) Signaling Events R-HSA-416482	2/78	0.0346903	0.136426	7.15537	24.0513	GNA12;RHOA
Nuclear Events Mediated By NFE2L2 R-HSA-9759194	2/78	0.0346903	0.136426	7.15537	24.0513	PSMD12;PSMB5
Amyloid Fiber Formation R-HSA-977225	2/79	0.0355065	0.137002	7.06209	23.5735	PRKN;H2AC19
Downstream Signaling Events Of B Cell Receptor (BCR) R-HSA-1168372	2/79	0.0355065	0.137002	7.06209	23.5735	PSMD12;PSMB5
Regulation Of APC/C Activators Between G1/S And Early Anaphase R-HSA-176408	2/80	0.0363302	0.138172	6.9712	23.1103	PSMD12;PSMB5
RHO GTPases Activate KTN1 R-HSA-5625970	1/10	0.0368814	0.138172	29.9039	98.6843	RHOA
rRNA Processing In Mitochondrion R-HSA-8868766	1/10	0.0368814	0.138172	29.9039	98.6843	MTERF4
Signaling By NOTCH4 R-HSA-9013694	2/81	0.0371613	0.138172	6.88261	22.6609	PSMD12;PSMB5
Cyclin E Associated Events During G1/S Transition R-HSA-69202	2/82	0.0379996	0.140017	6.79623	22.2249	PSMD12;PSMB5
TCF Dependent Signaling In Response To WNT R-HSA-201681	3/198	0.0383845	0.140172	4.21581	13.744	PSMD12;PSMB5;H2AC19
Cyclin A:Cdk2-associated Events At S Phase Entry R-HSA-69656	2/84	0.039698	0.140578	6.6298	21.3908	PSMD12;PSMB5
Degradation Of Beta-Catenin By Destruction Complex R-HSA-195253	2/84	0.039698	0.140578	6.6298	21.3908	PSMD12;PSMB5
Beta-oxidation Of Very Long Chain Fatty Acids R-HSA-390247	1/11	0.0404949	0.140578	26.9122	86.296	ACOX1
Regulation Of Signaling By NODAL R-HSA-1433617	1/11	0.0404949	0.140578	26.9122	86.296	ACVR1C
Free Fatty Acids Regulate Insulin Secretion R-HSA-400451	1/11	0.0404949	0.140578	26.9122	86.296	ACSL4
Hedgehog On State R-HSA-5632684	2/85	0.0405579	0.140578	6.5496	20.9916	PSMD12;PSMB5
Transcriptional Regulation By RUNX1 R-HSA-8878171	3/204	0.0413442	0.140897	4.08872	13.0259	PSMD12;PSMB5;H2AC19
APC/C-mediated Degradation Of Cell Cycle Proteins R-HSA-174143	2/87	0.0422987	0.140897	6.39484	20.2269	PSMD12;PSMB5
Regulation Of mRNA Stability By Proteins That Bind AU-rich Elements R-HSA-450531	2/88	0.0431795	0.140897	6.32017	19.8604	PSMD12;PSMB5
Signaling By ROBO Receptors R-HSA-376176	3/209	0.0438966	0.140897	3.98847	12.4676	PSMD12;PSMB5;RHOA
RAB GEFs Exchange GTP For GDP On RABs R-HSA-8876198	2/89	0.0440672	0.140897	6.24721	19.504	RAB1A;DENND2B
ER-Phagosome Pathway R-HSA-1236974	2/89	0.0440672	0.140897	6.24721	19.504	PSMD12;PSMB5
Mitochondrial Biogenesis R-HSA-1592230	2/89	0.0440672	0.140897	6.24721	19.504	CHCHD3;ATP5MF
Eicosanoids R-HSA-211979	1/12	0.044095	0.140897	24.4644	76.3633	CYP4F3
Josephin Domain DUBs R-HSA-5689877	1/12	0.044095	0.140897	24.4644	76.3633	PRKN
Miscellaneous Substrates R-HSA-211958	1/12	0.044095	0.140897	24.4644	76.3633	CYP4F3
Switching Of Origins To A Post-Replicative State R-HSA-69052	2/90	0.0449617	0.141456	6.1759	19.1573	PSMD12;PSMB5
MAPK6/MAPK4 Signaling R-HSA-5687128	2/90	0.0449617	0.141456	6.1759	19.1573	PSMD12;PSMB5
PTK6 Regulates RHO GTPases, RAS GTPase And MAP Kinases R-HSA-8849471	1/13	0.0476818	0.146631	22.4245	68.2425	RHOA
Glycogen Synthesis R-HSA-3322077	1/13	0.0476818	0.146631	22.4245	68.2425	PGM1
Alpha-Linolenic (Omega3) And Linoleic (Omega6) Acid Metabolism R-HSA-2046104	1/13	0.0476818	0.146631	22.4245	68.2425	ACOX1
Downstream TCR Signaling R-HSA-202424	2/94	0.0486064	0.148358	5.90619	17.8603	PSMD12;PSMB5
Transport Of Small Molecules R-HSA-382551	6/706	0.0490383	0.148568	2.3882	7.20079	PSMD12;PSMB5;LPL;NEDD4L;ABCC9;ATP9B
Transcriptional Regulation By RUNX3 R-HSA-8878159	2/95	0.0495339	0.148966	5.84239	17.557	PSMD12;PSMB5
Glycogen Breakdown (Glycogenolysis) R-HSA-70221	1/14	0.0512553	0.150467	20.6985	61.494	PGM1
Golgi Cisternae Pericentriolar Stack Reorganization R-HSA-162658	1/14	0.0512553	0.150467	20.6985	61.494	RAB1A
Hedgehog Off State R-HSA-5610787	2/98	0.0523549	0.150467	5.65896	16.6923	PSMD12;PSMB5
CLEC7A (Dectin-1) Signaling R-HSA-5607764	2/99	0.0533078	0.150467	5.60034	16.4184	PSMD12;PSMB5
TNFR2 Non-Canonical NF-kB Pathway R-HSA-5668541	2/100	0.0542669	0.150467	5.54291	16.1512	PSMD12;PSMB5
KEAP1-NFE2L2 Pathway R-HSA-9755511	2/100	0.0542669	0.150467	5.54291	16.1512	PSMD12;PSMB5
M Phase R-HSA-68886	4/380	0.0544869	0.150467	2.92913	8.52316	RAB1A;PSMD12;PSMB5;H2AC19
Signaling By Activin R-HSA-1502540	1/15	0.0548156	0.150467	19.2191	55.8081	ACVR1C
EPHA-mediated Growth Cone Collapse R-HSA-3928663	1/15	0.0548156	0.150467	19.2191	55.8081	RHOA
ERBB2 Regulates Cell Motility R-HSA-6785631	1/15	0.0548156	0.150467	19.2191	55.8081	RHOA
Eicosanoid Ligand-Binding Receptors R-HSA-391903	1/15	0.0548156	0.150467	19.2191	55.8081	PTGER3
Fatty Acids R-HSA-211935	1/15	0.0548156	0.150467	19.2191	55.8081	CYP4F3
Synthesis Of Prostaglandins (PG) And Thromboxanes (TX) R-HSA-2162123	1/15	0.0548156	0.150467	19.2191	55.8081	CBR1
Antigen processing-Cross Presentation R-HSA-1236975	2/104	0.058164	0.156015	5.32447	15.1454	PSMD12;PSMB5
Disease R-HSA-1643685	11/1736	0.0582571	0.156015	1.81341	5.15531	TOMM70;DPM1;PSMD12;PSMB5;H2AC19;NEDD4L;CCNC;ABCC9;PGM1;GTF2E2;QKI
Formation Of ATP By Chemiosmotic Coupling R-HSA-163210	1/16	0.0583627	0.156015	17.9369	50.9602	ATP5MF
TGF-beta Receptor Signaling In EMT (Epithelial To Mesenchymal Transition) R-HSA-2173791	1/16	0.0583627	0.156015	17.9369	50.9602	RHOA
Neddylation R-HSA-8951664	3/237	0.0595974	0.158281	3.50623	9.88808	PSMD12;PSMB5;DCUN1D4
Acyl Chain Remodelling Of PI R-HSA-1482922	1/17	0.0618967	0.162959	16.815	46.7843	PLAAT3
Gene Silencing By RNA R-HSA-211000	2/108	0.0621556	0.162959	5.12251	14.2309	H2AC19;ANG
Signaling By B Cell Receptor (BCR) R-HSA-983705	2/109	0.0631679	0.164558	5.07438	14.0152	PSMD12;PSMB5
Acyl Chain Remodelling Of PG R-HSA-1482925	1/18	0.0654175	0.169321	15.8251	43.1545	CRLS1
Golgi-to-ER Retrograde Transport R-HSA-8856688	2/112	0.0662381	0.169321	4.93524	13.3967	RAB1A;KIF19
Mitotic Prophase R-HSA-68875	2/112	0.0662381	0.169321	4.93524	13.3967	RAB1A;H2AC19
Interleukin-1 Signaling R-HSA-9020702	2/114	0.0683123	0.170851	4.84662	13.0067	PSMD12;PSMB5
Macroautophagy R-HSA-1632852	2/114	0.0683123	0.170851	4.84662	13.0067	TOMM70;PRKN
Assembly Of Active LPL And LIPC Lipase Complexes R-HSA-8963889	1/19	0.0689254	0.170851	14.9452	39.9744	LPL
RHO GTPases Activate ROCKs R-HSA-5627117	1/19	0.0689254	0.170851	14.9452	39.9744	RHOA
RHO GTPases Activate CIT R-HSA-5625900	1/19	0.0689254	0.170851	14.9452	39.9744	RHOA
TCR Signaling R-HSA-202403	2/116	0.070408	0.173475	4.76112	12.6334	PSMD12;PSMB5
Sema4D Induced Cell Migration And Growth-Cone Collapse R-HSA-416572	1/20	0.0724202	0.177364	14.1579	37.1683	RHOA
Synthesis Of DNA R-HSA-69239	2/119	0.0735906	0.178098	4.63833	12.1025	PSMD12;PSMB5
Transcriptional Regulation By RUNX2 R-HSA-8878166	2/119	0.0735906	0.178098	4.63833	12.1025	PSMD12;PSMB5
Diseases Of Signal Transduction By Growth Factor Receptors And Second Messengers R-HSA-5663202	4/424	0.0750037	0.18045	2.61636	6.77695	PSMD12;PSMB5;CCNC;QKI
Synthesis Of Leukotrienes (LT) And Eoxins (EX) R-HSA-2142691	1/21	0.0759021	0.180488	13.4493	34.6765	CYP4F3
Mitochondrial tRNA Aminoacylation R-HSA-379726	1/21	0.0759021	0.180488	13.4493	34.6765	PPA2
Rab Regulation Of Trafficking R-HSA-9007101	2/122	0.076819	0.181613	4.52169	11.604	RAB1A;DENND2B
Acyl Chain Remodelling Of PS R-HSA-1482801	1/22	0.0793711	0.185502	12.8082	32.4512	PLAAT3
Signaling By NODAL R-HSA-1181150	1/22	0.0793711	0.185502	12.8082	32.4512	ACVR1C
Cardiac Conduction R-HSA-5576891	2/126	0.0811923	0.18868	4.37494	10.9852	ABCC9;SCN3B
Glycerophospholipid Biosynthesis R-HSA-1483206	2/127	0.0822976	0.189703	4.33973	10.8381	PLAAT3;CRLS1
Triglyceride Catabolism R-HSA-163560	1/23	0.0828273	0.189703	12.2254	30.4535	ABHD5
Autophagy R-HSA-9612973	2/128	0.0834076	0.189703	4.30507	10.6939	TOMM70;PRKN
G1/S Transition R-HSA-69206	2/129	0.0845222	0.189703	4.27095	10.5524	PSMD12;PSMB5
Fc Epsilon Receptor (FCERI) Signaling R-HSA-2454202	2/130	0.0856414	0.189703	4.23737	10.4137	PSMD12;PSMB5
Host Interactions Of HIV Factors R-HSA-162909	2/130	0.0856414	0.189703	4.23737	10.4137	PSMD12;PSMB5
Aggrephagy R-HSA-9646399	1/24	0.0862706	0.189703	11.6933	28.6517	PRKN
Sema4D In Semaphorin Signaling R-HSA-400685	1/24	0.0862706	0.189703	11.6933	28.6517	RHOA
Synthesis Of Very Long-Chain Fatty acyl-CoAs R-HSA-75876	1/24	0.0862706	0.189703	11.6933	28.6517	ACSL4
Glycogen Metabolism R-HSA-8982491	1/24	0.0862706	0.189703	11.6933	28.6517	PGM1
G Beta:Gamma Signaling Thru PI3Kgamma R-HSA-392451	1/25	0.0897012	0.196191	11.2055	27.0195	RHOA
Signaling By Hedgehog R-HSA-5358351	2/135	0.0913043	0.198491	4.07704	9.75863	PSMD12;PSMB5
Gene Expression (Transcription) R-HSA-74160	9/1449	0.0917232	0.198491	1.75047	4.18185	PSMD12;PSMB5;H2AC19;NEDD4L;CCNC;ANG;RFFL;GTF2E2;MED7
Late Phase Of HIV Life Cycle R-HSA-162599	2/136	0.09245	0.199011	4.04641	9.63486	NEDD4L;GTF2E2
Downregulation Of TGF-beta Receptor Signaling R-HSA-2173788	1/26	0.0931191	0.199402	10.7568	25.5352	NEDD4L
Metabolism Of Proteins R-HSA-392499	11/1890	0.0937456	0.199698	1.6507	3.90748	TOMM70;DPM1;PRKN;RAB1A;PSMD12;PSMB5;PPA2;DCUN1D4;H2AC19;UBE2J2;RHOA
PTEN Regulation R-HSA-6807070	2/139	0.0959122	0.203254	3.9572	9.27696	PSMD12;PSMB5
Acyl Chain Remodelling Of PC R-HSA-1482788	1/27	0.0965243	0.203497	10.3425	24.1804	PLAAT3
C-type Lectin Receptors (CLRs) R-HSA-5621481	2/141	0.0982409	0.206054	3.89987	9.049	PSMD12;PSMB5
Neutrophil Degranulation R-HSA-6798695	4/468	0.0989053	0.206389	2.36292	5.46683	PSMD12;ORMDL3;PGM1;RHOA
Diseases Of Glycosylation R-HSA-3781865	2/143	0.100586	0.20883	3.84417	8.82907	DPM1;PGM1
Peroxisomal Lipid Metabolism R-HSA-390918	1/29	0.103297	0.209151	9.6028	21.7998	ACOX1
Acyl Chain Remodelling Of PE R-HSA-1482839	1/29	0.103297	0.209151	9.6028	21.7998	PLAAT3
Adherens Junctions Interactions R-HSA-418990	1/29	0.103297	0.209151	9.6028	21.7998	ANG
Budding And Maturation Of HIV Virion R-HSA-162588	1/29	0.103297	0.209151	9.6028	21.7998	NEDD4L
Interaction Between L1 And Ankyrins R-HSA-445095	1/29	0.103297	0.209151	9.6028	21.7998	SCN3B
Mitotic G1 Phase And G1/S Transition R-HSA-453279	2/147	0.105322	0.212201	3.73736	8.41181	PSMD12;PSMB5
G2/M Checkpoints R-HSA-69481	2/148	0.106516	0.213553	3.71158	8.31194	PSMD12;PSMB5
HIV Life Cycle R-HSA-162587	2/149	0.107713	0.2149	3.68614	8.21378	NEDD4L;GTF2E2
Downregulation Of SMAD2/3:SMAD4 Transcriptional Activity R-HSA-2173795	1/31	0.11002	0.217382	8.96171	19.7794	NEDD4L
Metalloprotease DUBs R-HSA-5689901	1/31	0.11002	0.217382	8.96171	19.7794	H2AC19
Interleukin-1 Family Signaling R-HSA-446652	2/152	0.111326	0.217677	3.61187	7.9291	PSMD12;PSMB5
Phase 0 - Rapid Depolarisation R-HSA-5576892	1/32	0.113362	0.217677	8.67219	18.8808	SCN3B
RNA Polymerase I Promoter Opening R-HSA-73728	1/32	0.113362	0.217677	8.67219	18.8808	H2AC19
G-protein Beta:Gamma Signaling R-HSA-397795	1/32	0.113362	0.217677	8.67219	18.8808	RHOA
GPVI-mediated Activation Cascade R-HSA-114604	1/32	0.113362	0.217677	8.67219	18.8808	RHOA
Thrombin Signaling Thru Proteinase Activated Receptors (PARs) R-HSA-456926	1/32	0.113362	0.217677	8.67219	18.8808	GNA12
Activation Of Matrix Metalloproteinases R-HSA-1592389	1/33	0.116692	0.220959	8.40076	18.0466	MMP16
Packaging Of Telomere Ends R-HSA-171306	1/33	0.116692	0.220959	8.40076	18.0466	H2AC19
Plasma Lipoprotein Remodeling R-HSA-8963899	1/33	0.116692	0.220959	8.40076	18.0466	LPL
RNA Polymerase II Transcription R-HSA-73857	8/1312	0.117532	0.221524	1.70506	3.65061	PSMD12;PSMB5;H2AC19;NEDD4L;CCNC;RFFL;GTF2E2;MED7
DNA Methylation R-HSA-5334118	1/34	0.12001	0.22311	8.14578	17.2705	H2AC19
Detoxification Of Reactive Oxygen Species R-HSA-3299685	1/34	0.12001	0.22311	8.14578	17.2705	GPX1
EPHB-mediated Forward Signaling R-HSA-3928662	1/34	0.12001	0.22311	8.14578	17.2705	RHOA
S Phase R-HSA-69242	2/161	0.122353	0.226436	3.40588	7.15522	PSMD12;PSMB5
Inwardly Rectifying K+ Channels R-HSA-1296065	1/35	0.123316	0.22719	7.9058	16.5469	ABCC9
Activated PKN1 Stimulates Transcription Of Androgen Receptor Regulated KLK2 And KLK3 R-HSA-5625886	1/36	0.126609	0.229979	7.67954	15.8709	H2AC19
Regulation Of TP53 Degradation R-HSA-6804757	1/36	0.126609	0.229979	7.67954	15.8709	RFFL
SMAD2/SMAD3:SMAD4 Heterotrimer Regulates Transcription R-HSA-2173796	1/36	0.126609	0.229979	7.67954	15.8709	CCNC
Regulation Of Expression Of SLITs And ROBOs R-HSA-9010553	2/167	0.129848	0.229979	3.28103	6.69787	PSMD12;PSMB5
Cleavage Of Damaged Purine R-HSA-110331	1/37	0.12989	0.229979	7.46584	15.2383	H2AC19
Regulation Of TP53 Expression And Degradation R-HSA-6806003	1/37	0.12989	0.229979	7.46584	15.2383	RFFL
SIRT1 Negatively Regulates rRNA Expression R-HSA-427359	1/37	0.12989	0.229979	7.46584	15.2383	H2AC19
Fatty acyl-CoA Biosynthesis R-HSA-75105	1/37	0.12989	0.229979	7.46584	15.2383	ACSL4
Triglyceride Metabolism R-HSA-8979227	1/37	0.12989	0.229979	7.46584	15.2383	ABHD5
Axon Guidance R-HSA-422475	4/519	0.130498	0.230059	2.12334	4.32397	PSMD12;PSMB5;SCN3B;RHOA
Cell Cycle, Mitotic R-HSA-69278	4/523	0.133138	0.232582	2.10654	4.24757	RAB1A;PSMD12;PSMB5;H2AC19
Assembly Of ORC Complex At Origin Of Replication R-HSA-68616	1/38	0.133159	0.232582	7.2637	14.6451	H2AC19
Separation Of Sister Chromatids R-HSA-2467813	2/170	0.133635	0.232582	3.22195	6.48463	PSMD12;PSMB5
Cellular Responses To Stress R-HSA-2262752	5/722	0.134246	0.232655	1.91353	3.84252	EGLN1;PSMD12;GPX1;PSMB5;H2AC19
Ovarian Tumor Domain Proteases R-HSA-5689896	1/39	0.136416	0.235418	7.07219	14.0881	RHOA
Ion Channel Transport R-HSA-983712	2/175	0.140003	0.24037	3.12804	6.15001	NEDD4L;ATP9B
Adaptive Immune System R-HSA-1280218	5/733	0.140461	0.24037	1.88354	3.69706	PRKN;PSMD12;PSMB5;NEDD4L;UBE2J2
Cellular Responses To Stimuli R-HSA-8953897	5/736	0.142177	0.242294	1.87551	3.65852	EGLN1;PSMD12;GPX1;PSMB5;H2AC19
Apoptosis R-HSA-109581	2/178	0.143855	0.242354	3.07425	5.96081	PSMD12;PSMB5
PRC2 Methylates Histones And DNA R-HSA-212300	1/42	0.146114	0.242354	6.55372	12.6052	H2AC19
Cleavage Of Damaged Pyrimidine R-HSA-110329	1/42	0.146114	0.242354	6.55372	12.6052	H2AC19
Defective Pyroptosis R-HSA-9710421	1/42	0.146114	0.242354	6.55372	12.6052	H2AC19
tRNA Aminoacylation R-HSA-379724	1/42	0.146114	0.242354	6.55372	12.6052	PPA2
Kinesins R-HSA-983189	1/42	0.146114	0.242354	6.55372	12.6052	KIF19
Intra-Golgi And Retrograde Golgi-to-ER Traffic R-HSA-6811442	2/181	0.14773	0.242354	3.02227	5.77969	RAB1A;KIF19
Nervous System Development R-HSA-9675108	4/545	0.14805	0.242354	2.01859	3.85591	PSMD12;PSMB5;SCN3B;RHOA
G2/M Transition R-HSA-69275	2/182	0.149027	0.242354	3.00533	5.72103	PSMD12;PSMB5
Neurotransmitter Receptors And Postsynaptic Signal Transmission R-HSA-112314	2/182	0.149027	0.242354	3.00533	5.72103	GABRB2;HTR3A
Condensation Of Prophase Chromosomes R-HSA-2299718	1/43	0.149323	0.242354	6.39736	12.1655	H2AC19
Retinoid Metabolism And Transport R-HSA-975634	1/43	0.149323	0.242354	6.39736	12.1655	LPL
Infectious Disease R-HSA-5663205	6/961	0.15121	0.242726	1.72729	3.26301	TOMM70;PSMD12;PSMB5;H2AC19;NEDD4L;GTF2E2
Mitotic G2-G2/M Phases R-HSA-453274	2/184	0.151627	0.242726	2.972	5.60618	PSMD12;PSMB5
Base-Excision Repair, AP Site Formation R-HSA-73929	1/44	0.15252	0.242726	6.24827	11.7496	H2AC19
Sphingolipid De Novo Biosynthesis R-HSA-1660661	1/44	0.15252	0.242726	6.24827	11.7496	ORMDL3
TGF-beta Receptor Signaling Activates SMADs R-HSA-2173789	1/44	0.15252	0.242726	6.24827	11.7496	NEDD4L
Metabolism Of Vitamins And Cofactors R-HSA-196854	2/186	0.154236	0.244506	2.9394	5.49454	CYB5A;LPL
ERCC6 (CSB) And EHMT2 (G9a) Positively Regulate rRNA Expression R-HSA-427389	1/45	0.155705	0.245882	6.10596	11.3558	H2AC19
Generic Transcription Pathway R-HSA-212436	7/1190	0.157722	0.248108	1.63087	3.0121	PSMD12;PSMB5;H2AC19;NEDD4L;CCNC;RFFL;MED7
HIV Transcription Initiation R-HSA-167161	1/46	0.158878	0.24897	5.96997	10.9825	GTF2E2
Metabolism Of Fat-Soluble Vitamins R-HSA-6806667	1/47	0.16204	0.252955	5.83989	10.6281	LPL
Inhibition Of DNA Recombination At Telomere R-HSA-9670095	1/48	0.165189	0.255919	5.71535	10.2914	H2AC19
NOTCH1 Intracellular Domain Regulates Transcription R-HSA-2122947	1/48	0.165189	0.255919	5.71535	10.2914	CCNC
Muscle Contraction R-HSA-397014	2/196	0.167409	0.25785	2.78647	4.9803	ABCC9;SCN3B
RMTs Methylate Histone Arginines R-HSA-3214858	1/49	0.168328	0.25785	5.596	9.9712	H2AC19
Signaling By ERBB2 R-HSA-1227986	1/49	0.168328	0.25785	5.596	9.9712	RHOA
Ion Homeostasis R-HSA-5578775	1/50	0.171454	0.261659	5.48152	9.66634	ABCC9
Neuronal System R-HSA-112316	3/386	0.176485	0.268335	2.12598	3.68756	GABRB2;ABCC9;HTR3A
Signaling By Non-Receptor Tyrosine Kinases R-HSA-9006927	1/52	0.177672	0.26914	5.26603	9.09873	RHOA
Deposition Of New CENPA-containing Nucleosomes At Centromere R-HSA-606279	1/53	0.180764	0.27181	5.1645	8.83421	H2AC19
Ion Transport By P-type ATPases R-HSA-936837	1/53	0.180764	0.27181	5.1645	8.83421	ATP9B
Phospholipid Metabolism R-HSA-1483257	2/208	0.183464	0.273857	2.62256	4.44716	PLAAT3;CRLS1
Programmed Cell Death R-HSA-5357801	2/208	0.183464	0.273857	2.62256	4.44716	PSMD12;PSMB5
E3 Ubiquitin Ligases Ubiquitinate Target Proteins R-HSA-8866654	1/56	0.18997	0.281514	4.88206	8.10855	UBE2J2
Meiotic Recombination R-HSA-912446	1/56	0.18997	0.281514	4.88206	8.10855	H2AC19
Innate Immune System R-HSA-168249	6/1035	0.191667	0.283003	1.59682	2.63795	TOMM70;PSMD12;PSMB5;ORMDL3;PGM1;RHOA
Signaling By ERBB4 R-HSA-1236394	1/57	0.193017	0.28397	4.79464	7.88709	GABRB2
Constitutive Signaling By NOTCH1 HD+PEST Domain Mutants R-HSA-2894862	1/58	0.196051	0.287402	4.71029	7.67484	CCNC
B-WICH Complex Positively Regulates rRNA Expression R-HSA-5250924	1/59	0.199075	0.287709	4.62884	7.4713	H2AC19
RNA Polymerase I Promoter Escape R-HSA-73772	1/59	0.199075	0.287709	4.62884	7.4713	H2AC19
GABA Receptor Activation R-HSA-977443	1/59	0.199075	0.287709	4.62884	7.4713	GABRB2
Transcriptional Regulation Of Granulopoiesis R-HSA-9616222	1/59	0.199075	0.287709	4.62884	7.4713	H2AC19
Formation Of beta-catenin:TCF Transactivating Complex R-HSA-201722	1/60	0.202087	0.288999	4.55016	7.27596	H2AC19
HDACs Deacetylate Histones R-HSA-3214815	1/60	0.202087	0.288999	4.55016	7.27596	H2AC19
Meiotic Synapsis R-HSA-1221632	1/60	0.202087	0.288999	4.55016	7.27596	H2AC19
Cell-cell Junction Organization R-HSA-421270	1/61	0.205089	0.291254	4.4741	7.08838	ANG
DNA Damage/Telomere Stress Induced Senescence R-HSA-2559586	1/61	0.205089	0.291254	4.4741	7.08838	H2AC19
Pre-NOTCH Transcription And Translation R-HSA-1912408	1/62	0.208079	0.292454	4.40053	6.90813	H2AC19
RAB Geranylgeranylation R-HSA-8873719	1/62	0.208079	0.292454	4.40053	6.90813	RAB1A
Signaling By BRAF And RAF1 Fusions R-HSA-6802952	1/62	0.208079	0.292454	4.40053	6.90813	QKI
Peroxisomal Protein Import R-HSA-9033241	1/63	0.211058	0.294616	4.32934	6.73482	ACOX1
Synthesis Of Substrates In N-glycan Biosythesis R-HSA-446219	1/63	0.211058	0.294616	4.32934	6.73482	DPM1
Semaphorin Interactions R-HSA-373755	1/64	0.214025	0.297743	4.2604	6.5681	RHOA
Mitotic Anaphase R-HSA-68882	2/232	0.21618	0.299598	2.34604	3.5933	PSMD12;PSMB5
Cytochrome P450 - Arranged By Substrate Type R-HSA-211897	1/65	0.216982	0.299598	4.19362	6.4076	CYP4F3
Mitotic Metaphase And Anaphase R-HSA-2555396	2/233	0.217556	0.299598	2.33576	3.56274	PSMD12;PSMB5
COPII-mediated Vesicle Transport R-HSA-204005	1/66	0.219928	0.300838	4.1289	6.25303	RAB1A
RUNX1 Regulates Genes Involved In Megakaryocyte Differentiation And Platelet Function R-HSA-8936459	1/66	0.219928	0.300838	4.1289	6.25303	H2AC19
Collagen Biosynthesis And Modifying Enzymes R-HSA-1650814	1/67	0.222863	0.303837	4.06613	6.10407	PLOD2
Transcription Of HIV Genome R-HSA-167172	1/69	0.2287	0.310759	3.94614	5.82192	GTF2E2
Cell Cycle R-HSA-1640170	4/654	0.23012	0.311653	1.67064	2.45442	RAB1A;PSMD12;PSMB5;H2AC19
Plasma Lipoprotein Assembly, Remodeling, And Clearance R-HSA-174824	1/71	0.234494	0.315487	3.83301	5.55911	LPL
Diseases Of Programmed Cell Death R-HSA-9645723	1/71	0.234494	0.315487	3.83301	5.55911	H2AC19
Transmission Across Chemical Synapses R-HSA-112315	2/246	0.235515	0.315822	2.20986	3.19541	GABRB2;HTR3A
Diseases Of Metabolism R-HSA-5668914	2/247	0.236901	0.316243	2.20073	3.1693	DPM1;PGM1
Base Excision Repair R-HSA-73884	1/72	0.237375	0.316243	3.77884	5.43439	H2AC19
RHOC GTPase Cycle R-HSA-9013106	1/73	0.240245	0.318686	3.72616	5.31386	RHOA
Positive Epigenetic Regulation Of rRNA Expression R-HSA-5250913	1/74	0.243105	0.318686	3.67494	5.19732	H2AC19
RNA Polymerase II Transcribes snRNA Genes R-HSA-6807505	1/74	0.243105	0.318686	3.67494	5.19732	GTF2E2
Signaling By NOTCH1 R-HSA-1980143	1/74	0.243105	0.318686	3.67494	5.19732	CCNC
NoRC Negatively Regulates rRNA Expression R-HSA-427413	1/74	0.243105	0.318686	3.67494	5.19732	H2AC19
Platelet Activation, Signaling And Aggregation R-HSA-76002	2/254	0.246613	0.322252	2.13883	2.99423	GNA12;RHOA
Protein Ubiquitination R-HSA-8852135	1/76	0.248792	0.323035	3.57658	4.97551	UBE2J2
Transcriptional Regulation By Small RNAs R-HSA-5578749	1/76	0.248792	0.323035	3.57658	4.97551	H2AC19
Biosynthesis Of N-glycan Precursor (Dolichol LLO) And Transfer To Protein R-HSA-446193	1/77	0.25162	0.323624	3.52934	4.86991	DPM1
Regulation Of Insulin Secretion R-HSA-422356	1/77	0.25162	0.323624	3.52934	4.86991	ACSL4
Negative Epigenetic Regulation Of rRNA Expression R-HSA-5250941	1/77	0.25162	0.323624	3.52934	4.86991	H2AC19
Oncogenic MAPK Signaling R-HSA-6802957	1/78	0.254437	0.324189	3.48333	4.76764	QKI
Pre-NOTCH Expression And Processing R-HSA-1912422	1/78	0.254437	0.324189	3.48333	4.76764	H2AC19
RNA Polymerase I Promoter Clearance R-HSA-73854	1/78	0.254437	0.324189	3.48333	4.76764	H2AC19
RNA Polymerase I Transcription R-HSA-73864	1/79	0.257244	0.326748	3.4385	4.66855	H2AC19
COPI-mediated Anterograde Transport R-HSA-6807878	1/80	0.26004	0.328261	3.3948	4.57252	RAB1A
RNA Polymerase II Pre-transcription Events R-HSA-674695	1/80	0.26004	0.328261	3.3948	4.57252	GTF2E2
DDX58/IFIH1-mediated Induction Of Interferon-Alpha/Beta R-HSA-168928	1/81	0.262826	0.329742	3.3522	4.47941	TOMM70
Senescence-Associated Secretory Phenotype (SASP) R-HSA-2559582	1/81	0.262826	0.329742	3.3522	4.47941	H2AC19
PIP3 Activates AKT Signaling R-HSA-1257604	2/268	0.26608	0.332804	2.02482	2.68078	PSMD12;PSMB5
RHO GTPase Effectors R-HSA-195258	2/269	0.267472	0.333524	2.01714	2.66008	H2AC19;RHOA
RAF/MAP Kinase Cascade R-HSA-5673001	2/271	0.270255	0.334952	2.00194	2.61931	PSMD12;PSMB5
Cell Cycle Checkpoints R-HSA-69620	2/271	0.270255	0.334952	2.00194	2.61931	PSMD12;PSMB5
Organelle Biogenesis And Maintenance R-HSA-1852241	2/275	0.275821	0.340753	1.9722	2.5402	CHCHD3;ATP5MF
Cell Junction Organization R-HSA-446728	1/86	0.276602	0.340753	3.15421	4.05372	ANG
MAPK1/MAPK3 Signaling R-HSA-5684996	2/277	0.278603	0.342188	1.95766	2.50182	PSMD12;PSMB5
Meiosis R-HSA-1500620	1/88	0.282041	0.345373	3.08139	3.90013	H2AC19
Sphingolipid Metabolism R-HSA-428157	1/89	0.284745	0.347597	3.04622	3.82655	ORMDL3
Asparagine N-linked Glycosylation R-HSA-446203	2/282	0.285557	0.347597	1.92221	2.40914	DPM1;RAB1A
Collagen Formation R-HSA-1474290	1/90	0.287439	0.34885	3.01184	3.755	PLOD2
Activation Of HOX Genes During Differentiation R-HSA-5619507	1/91	0.290123	0.349001	2.97823	3.68541	H2AC19
EPH-Ephrin Signaling R-HSA-2682334	1/91	0.290123	0.349001	2.97823	3.68541	RHOA
HCMV Late Events R-HSA-9610379	1/91	0.290123	0.349001	2.97823	3.68541	H2AC19
Post-translational Modification: Synthesis Of GPI-anchored Proteins R-HSA-163125	1/92	0.292797	0.350158	2.94535	3.6177	DPM1
Telomere Maintenance R-HSA-157579	1/92	0.292797	0.350158	2.94535	3.6177	H2AC19
Oxidative Stress Induced Senescence R-HSA-2559580	1/93	0.295462	0.35129	2.91319	3.55181	H2AC19
VEGFA-VEGFR2 Pathway R-HSA-4420097	1/93	0.295462	0.35129	2.91319	3.55181	RHOA
Extracellular Matrix Organization R-HSA-1474244	2/291	0.298058	0.35335	1.8615	2.25328	MMP16;PLOD2
P75 NTR Receptor-Mediated Signaling R-HSA-193704	1/95	0.30076	0.355523	2.85092	3.42521	RHOA
HCMV Early Events R-HSA-9609690	1/96	0.303395	0.356734	2.82077	3.36438	H2AC19
Immune System R-HSA-168256	9/1943	0.303529	0.356734	1.26852	1.51243	TOMM70;PRKN;PSMD12;PSMB5;ORMDL3;NEDD4L;UBE2J2;PGM1;RHOA
Visual Phototransduction R-HSA-2187338	1/98	0.308635	0.361696	2.76233	3.24738	LPL
L1CAM Interactions R-HSA-373760	1/99	0.31124	0.363707	2.734	3.1911	SCN3B
Stimuli-sensing Channels R-HSA-2672351	1/100	0.313836	0.365695	2.70625	3.13623	NEDD4L
Intracellular Signaling By Second Messengers R-HSA-9006925	2/306	0.31882	0.368561	1.76829	2.02139	PSMD12;PSMB5
Potassium Channels R-HSA-1296071	1/102	0.318999	0.368561	2.65239	3.03054	ABCC9
Signaling By VEGF R-HSA-194138	1/102	0.318999	0.368561	2.65239	3.03054	RHOA
Phase I - Functionalization Of Compounds R-HSA-211945	1/104	0.324123	0.373426	2.60063	2.92996	CYP4F3
Integration Of Energy Metabolism R-HSA-163685	1/105	0.326671	0.375304	2.57549	2.88147	ACSL4
HATs Acetylate Histones R-HSA-3214847	1/106	0.329209	0.377161	2.55084	2.83414	H2AC19
MAPK Family Signaling Cascades R-HSA-5683057	2/318	0.335334	0.383105	1.7001	1.85758	PSMD12;PSMB5
Degradation Of Extracellular Matrix R-HSA-1474228	1/109	0.336767	0.383671	2.4796	2.69871	MMP16
Respiratory Electron Transport, ATP Synthesis By Chemiosmotic Coupling, Heat Production By Uncoupling Proteins R-HSA-163200	1/112	0.344242	0.391097	2.41222	2.57242	ATP5MF
Reproduction R-HSA-1474165	1/113	0.346715	0.392815	2.39056	2.53221	H2AC19
Signaling By NTRK1 (TRKA) R-HSA-187037	1/114	0.349178	0.394514	2.36929	2.4929	RHOA
Epigenetic Regulation Of Gene Expression R-HSA-212165	1/116	0.354078	0.398948	2.32785	2.41686	H2AC19
Chromosome Maintenance R-HSA-73886	1/118	0.358942	0.403317	2.28783	2.34409	H2AC19
RHO GTPases Activate Formins R-HSA-5663220	1/119	0.36136	0.403815	2.26832	2.30888	RHOA
Estrogen-dependent Gene Expression R-HSA-9018519	1/119	0.36136	0.403815	2.26832	2.30888	H2AC19
Cell-Cell Communication R-HSA-1500931	1/120	0.363769	0.4054	2.24915	2.27442	ANG
SARS-CoV-2 Activates/Modulates Innate And Adaptive Immune Responses R-HSA-9705671	1/121	0.36617	0.405863	2.23029	2.24068	TOMM70
HCMV Infection R-HSA-9609646	1/121	0.36617	0.405863	2.23029	2.24068	H2AC19
Hemostasis R-HSA-109582	3/576	0.367224	0.405931	1.40721	1.40972	KIF19;GNA12;RHOA
Metabolism Of Water-Soluble Vitamins And Cofactors R-HSA-196849	1/122	0.368561	0.406311	2.21175	2.20766	CYB5A
Membrane Trafficking R-HSA-199991	3/599	0.390757	0.429623	1.3513	1.26977	RAB1A;KIF19;DENND2B
Signaling By NTRKs R-HSA-166520	1/132	0.39199	0.429823	2.04188	1.91226	RHOA
ER To Golgi Anterograde Transport R-HSA-199977	1/133	0.394285	0.431183	2.02631	1.88585	RAB1A
Metabolism Of Amino Acids And Derivatives R-HSA-71291	2/364	0.397419	0.433452	1.48059	1.36623	PSMD12;PSMB5
Factors Involved In Megakaryocyte Development And Platelet Production R-HSA-983231	1/136	0.40112	0.436324	1.98098	1.80962	KIF19
Death Receptor Signaling R-HSA-73887	1/139	0.407878	0.442499	1.93762	1.73764	RHOA
GPCR Downstream Signaling R-HSA-388396	3/619	0.41106	0.444771	1.30607	1.16112	PTGER3;GNA12;RHOA
RHOA GTPase Cycle R-HSA-8980692	1/147	0.425534	0.459218	1.83071	1.56418	RHOA
Vesicle-mediated Transport R-HSA-5653656	3/637	0.429166	0.461919	1.26781	1.07245	RAB1A;KIF19;DENND2B
Signal Transduction R-HSA-162582	10/2465	0.446693	0.478461	1.09478	0.882267	GABRB2;PSMD12;ACVR1C;PSMB5;PTGER3;GNA12;H2AC19;NEDD4L;CCNC;RHOA
Regulation Of TP53 Activity R-HSA-5633007	1/157	0.446876	0.478461	1.71249	1.37937	RFFL
Metabolism Of RNA R-HSA-8953854	3/666	0.45793	0.489017	1.21053	0.945473	PSMD12;PSMB5;MTERF4
Citric Acid (TCA) Cycle And Respiratory Electron Transport R-HSA-1428517	1/163	0.459303	0.489206	1.64857	1.28266	ATP5MF
Transport To Golgi And Subsequent Modification R-HSA-948021	1/164	0.461347	0.490107	1.63837	1.26745	RAB1A
Cellular Senescence R-HSA-2559583	1/165	0.463384	0.490995	1.6283	1.25248	H2AC19
Signaling By GPCR R-HSA-372790	3/689	0.480324	0.507629	1.16855	0.856892	PTGER3;GNA12;RHOA
ESR-mediated Signaling R-HSA-8939211	1/188	0.508185	0.535435	1.42636	0.965518	H2AC19
Signaling By Interleukins R-HSA-449147	2/453	0.509252	0.535435	1.183	0.798304	PSMD12;PSMB5
SARS-CoV-2-host Interactions R-HSA-9705683	1/196	0.522886	0.54836	1.36729	0.886539	TOMM70
rRNA Processing R-HSA-72312	1/199	0.528287	0.552607	1.34637	0.85914	MTERF4
Signaling By Receptor Tyrosine Kinases R-HSA-9006934	2/496	0.558363	0.582578	1.07764	0.627993	GABRB2;RHOA
Biological Oxidations R-HSA-211859	1/218	0.561116	0.58396	1.2273	0.709169	CYP4F3
Chromatin Modifying Enzymes R-HSA-3247509	1/238	0.593238	0.615823	1.12259	0.586172	H2AC19
Signaling By Nuclear Receptors R-HSA-9006931	1/260	0.625897	0.64808	1.02609	0.480794	H2AC19
Translation R-HSA-72766	1/281	0.654652	0.676143	0.948118	0.401672	PPA2
SARS-CoV-2 Infection R-HSA-9694516	1/283	0.657274	0.677141	0.941298	0.39502	TOMM70
Metabolism Of Carbohydrates R-HSA-71387	1/285	0.659876	0.678114	0.934574	0.388505	PGM1
DNA Repair R-HSA-73894	1/310	0.690807	0.708121	0.857868	0.31732	H2AC19
G Alpha (I) Signaling Events R-HSA-418594	1/312	0.693158	0.708754	0.852264	0.312352	PTGER3
Signaling By Rho GTPases R-HSA-194315	2/644	0.700365	0.714338	0.822899	0.293078	H2AC19;RHOA
Class A/1 (Rhodopsin-like Receptors) R-HSA-373076	1/327	0.710238	0.722605	0.812427	0.277977	PTGER3
Signaling By Rho GTPases, Miro GTPases And RHOBTB3 R-HSA-9716542	2/660	0.713247	0.723866	0.802223	0.271093	H2AC19;RHOA
Transcriptional Regulation By TP53 R-HSA-3700989	1/354	0.738649	0.747791	0.749254	0.226973	RFFL
Cytokine Signaling In Immune System R-HSA-1280215	2/702	0.744903	0.75226	0.752446	0.221597	PSMD12;PSMB5
SARS-CoV Infections R-HSA-9679506	1/369	0.753227	0.758792	0.718162	0.203519	TOMM70
RHO GTPase Cycle R-HSA-9012999	1/441	0.812764	0.816758	0.598434	0.124064	RHOA
GPCR Ligand Binding R-HSA-500792	1/458	0.824607	0.826628	0.57567	0.111017	PTGER3
Sensory Perception R-HSA-9709957	1/616	0.9047	0.9047	0.424302	0.0424946	LPL

## Sheet: WikiPathway
Term	Overlap	P-value	Adjusted p-value	Odds Ratio	Combined Score	Genes
Fatty Acid Beta Oxidation WP143	3/34	0.000278767	0.0490629	26.7392	218.864	LPL;ACSL4;ACAT1
Omega 3 Omega 6 Fatty Acid Synthesis WP4723	2/15	0.00141156	0.106076	41.9642	275.413	ACOX1;ACSL4
PPAR Signaling WP3942	3/68	0.00213097	0.106076	12.7308	78.3092	ACOX1;LPL;ACSL4
Parkin Ubiquitin Proteasomal System Pathway WP2359	3/71	0.00241082	0.106076	12.1673	73.3418	PRKN;PSMD12;UBE2J2
Metabolic Pathways Of Fibroblasts WP5312	2/32	0.00639896	0.196659	18.1689	91.7826	PGM1;RHOA
Leukocyte Intrinsic Hippo Pathway Functions WP4542	2/34	0.00720265	0.196659	17.0317	84.0225	LPL;RHOA
mBDNF And proBDNF Regulation Of GABA Neurotransmission WP4829	2/38	0.00893903	0.196659	15.1362	71.4025	GABRB2;RHOA
Parkinson 39 S Disease Pathway WP2371	2/38	0.00893903	0.196659	15.1362	71.4025	PRKN;UBE2J2
Prostaglandin Synthesis And Regulation WP98	2/45	0.0123778	0.224628	12.6677	55.6348	CBR1;PTGER3
Omega 6 Fatty Acids In Senescence WP5424	2/48	0.0140017	0.224628	11.8398	50.5391	CBR1;GPX1
Sebaleic Acid Formation And Metabolism WP5315	1/5	0.0186116	0.224628	67.3007	268.124	CYP4F3
Disorders In Ketolysis WP5195	1/5	0.0186116	0.224628	67.3007	268.124	ACAT1
Disorders In Ketone Body Synthesis WP5175	1/5	0.0186116	0.224628	67.3007	268.124	ACAT1
Smith Magenis And Potocki Lupski Syndrome Copy Number Variation WP5381	3/156	0.0208812	0.224628	5.38453	20.8322	PRKN;C9ORF72;RHOA
VEGFA VEGFR2 Signaling WP3888	5/430	0.0226887	0.224628	3.27731	12.4075	DPM1;GPX1;RHOA;ZC3H15;QKI
Proteasome Degradation WP183	2/62	0.0226966	0.224628	9.07078	34.3378	PSMD12;PSMB5
Oxidation By Cytochrome P450 WP43	2/63	0.0233846	0.224628	8.92163	33.5067	CYB5A;CYP4F3
Physico Chemical Features And Toxicity Associated Pathways WP3680	2/66	0.0254997	0.224628	8.50214	31.1951	GPX1;RHOA
Hypothetical Craniofacial Development Pathway WP3655	1/7	0.0259602	0.224628	44.8626	163.802	RHOA
Ketogenesis And Ketolysis WP4742	1/8	0.0296141	0.224628	38.4517	135.331	ACAT1
SARS CoV 2 B 1 1 7 Variant Antagonises Innate Immune Activation WP5116	1/9	0.0332545	0.224628	33.6436	114.508	TOMM70
Lipid Particles Composition WP3601	1/10	0.0368814	0.224628	29.9039	98.6843	LPL
SARS CoV 2 And COVID 19 Pathway WP4846	1/10	0.0368814	0.224628	29.9039	98.6843	ACAT1
UDP Derived Sugars Synthesis In Fibroblasts WP5394	1/11	0.0404949	0.224628	26.9122	86.296	PGM1
Alternative Pathway Of Fetal Androgen Synthesis WP4524	1/11	0.0404949	0.224628	26.9122	86.296	CYB5A
Clear Cell Renal Cell Carcinoma Pathways WP4018	2/85	0.0405579	0.224628	6.5496	20.9916	PLOD2;PGM1
PtdIns 4 5 P2 In Cytokinesis Pathway WP5199	1/12	0.044095	0.224628	24.4644	76.3633	RHOA
G Protein Signaling WP35	2/91	0.0458629	0.224628	6.1062	18.8199	GNA12;RHOA
Leukotriene Metabolic Pathway WP5171	1/13	0.0476818	0.224628	22.4245	68.2425	CYP4F3
Estrogen Receptor Pathway WP2881	1/13	0.0476818	0.224628	22.4245	68.2425	ACOX1
Homologous Recombination WP186	1/13	0.0476818	0.224628	22.4245	68.2425	RAD54B
Mevalonate Arm Of Cholesterol Biosynthesis Pathway WP4190	1/13	0.0476818	0.224628	22.4245	68.2425	ACAT1
Disorders Of Galactose Metabolism WP5173	1/13	0.0476818	0.224628	22.4245	68.2425	PGM1
Familial Hyperlipidemia Type 3 WP5110	1/13	0.0476818	0.224628	22.4245	68.2425	LPL
ADHD And Autism ASD Pathways WP5420	4/370	0.0503145	0.224628	3.0107	9.00036	GABRB2;CBR1;SCN3B;RHOA
Omega 9 Fatty Acid Synthesis WP4724	1/14	0.0512553	0.224628	20.6985	61.494	ACSL4
Glucocorticoid Biosynthesis WP5280	1/14	0.0512553	0.224628	20.6985	61.494	CBR1
Disorders Of Fructose Metabolism WP5178	1/14	0.0512553	0.224628	20.6985	61.494	PGM1
Familial Hyperlipidemia Type 5 WP5112	1/15	0.0548156	0.224628	19.2191	55.8081	LPL
Classcl Pathway Steroidogenesis W Glucocort Mineralocort Metab WP4523	1/16	0.0583627	0.224628	17.9369	50.9602	CYB5A
Airway Smooth Muscle Cell Contraction WP4962	1/16	0.0583627	0.224628	17.9369	50.9602	RHOA
2Q21 1 Copy Number Variation Syndrome WP5223	1/16	0.0583627	0.224628	17.9369	50.9602	RHOA
Familial Hyperlipidemia Type 2 WP5109	1/16	0.0583627	0.224628	17.9369	50.9602	LPL
MAP3K1 Role In Promoting And Blocking Gonadal Determination WP4872	1/17	0.0618967	0.224628	16.815	46.7843	RHOA
Metabolic Pathway Of LDL HDL And TG Including Diseases WP4522	1/17	0.0618967	0.224628	16.815	46.7843	LPL
Mitochondrial Long Chain Fatty Acid Beta Oxidation WP368	1/17	0.0618967	0.224628	16.815	46.7843	ACSL4
Fatty Acid Transporters WP5061	1/18	0.0654175	0.224628	15.8251	43.1545	ACSL4
Familial Hyperlipidemia Type 1 WP5108	1/18	0.0654175	0.224628	15.8251	43.1545	LPL
Senescence Associated Secretory Phenotype SASP WP3391	2/113	0.0672725	0.224628	4.89053	13.1996	H2AC19;H2AC18
Glutathione Metabolism WP100	1/19	0.0689254	0.224628	14.9452	39.9744	GPX1
Small Ligand GPCRs WP247	1/19	0.0689254	0.224628	14.9452	39.9744	PTGER3
Mitochondrial Fatty Acid Oxidation Disorders WP5123	1/19	0.0689254	0.224628	14.9452	39.9744	ACSL4
Hereditary Leiomyomatosis And Renal Cell Carcinoma Pathway WP4206	1/20	0.0724202	0.224628	14.1579	37.1683	EGLN1
Autophagy In Pancreatic Ductal Adenocarcinoma WP5331	1/20	0.0724202	0.224628	14.1579	37.1683	PRKN
Alzheimer 39 S Disease And miRNA Effects WP2059	3/261	0.0748728	0.224628	3.1762	8.23258	PSMD12;PSMB5;LPL
Alzheimer 39 S Disease WP5124	3/261	0.0748728	0.224628	3.1762	8.23258	PSMD12;PSMB5;LPL
GNAQ Pathways In Port Wine Stain WP5437	1/21	0.0759021	0.224628	13.4493	34.6765	RHOA
Glycerolipids And Glycerophospholipids WP4722	1/22	0.0793711	0.224628	12.8082	32.4512	CRLS1
Fatty Acid Biosynthesis WP357	1/22	0.0793711	0.224628	12.8082	32.4512	ACSL4
Sildenafil Treatment WP5294	1/22	0.0793711	0.224628	12.8082	32.4512	PRKN
Familial Hyperlipidemia Type 4 WP5111	1/22	0.0793711	0.224628	12.8082	32.4512	LPL
Eicosanoid Synthesis WP167	1/23	0.0828273	0.224628	12.2254	30.4535	CBR1
Leucine Isoleucine And Valine Metabolism WP4686	1/24	0.0862706	0.224628	11.6933	28.6517	ACAT1
Triacylglyceride Synthesis WP325	1/24	0.0862706	0.224628	11.6933	28.6517	LPL
Physiological And Pathological Hypertrophy Of The Heart WP1528	1/24	0.0862706	0.224628	11.6933	28.6517	RHOA
TGF Beta Signaling Pathway WP366	2/132	0.0878933	0.224628	4.17176	10.1442	NEDD4L;RHOA
Relationship Between Inflammation COX 2 And EGFR WP4483	1/25	0.0897012	0.224628	11.2055	27.0195	PTGER3
Glycosylation And Related Congenital Defects WP4521	1/25	0.0897012	0.224628	11.2055	27.0195	DPM1
Glucuronidation WP698	1/26	0.0931191	0.224628	10.7568	25.5352	PGM1
SARS CoV 2 Mt Chronic Ox Stress And Endothelial Dysfunction WP5183	1/26	0.0931191	0.224628	10.7568	25.5352	TOMM70
COVID 19 Structural Coverage Map WP5145	1/26	0.0931191	0.224628	10.7568	25.5352	TOMM70
Dravet Syndrome WP5200	1/28	0.0999169	0.224628	9.95896	22.9396	SCN3B
Eicosanoid Metabolism Via Lipooxygenases LOX WP4721	1/28	0.0999169	0.224628	9.95896	22.9396	ACOX1
Statin Inhibition Of Cholesterol Production WP430	1/29	0.103297	0.224628	9.6028	21.7998	LPL
RAS And Bradykinin Pathways In COVID 19 WP4969	1/29	0.103297	0.224628	9.6028	21.7998	RHOA
Lipid Metabolism Pathway WP3965	1/29	0.103297	0.224628	9.6028	21.7998	ABHD5
4P16 3 Copy Number Variation WP5365	1/30	0.106664	0.224628	9.2712	20.7496	UBE2J2
Glycerophospholipid Biosynthetic Pathway WP2533	1/30	0.106664	0.224628	9.2712	20.7496	CRLS1
Matrix Metalloproteinases WP129	1/30	0.106664	0.224628	9.2712	20.7496	MMP16
Familial Partial Lipodystrophy WP5102	1/30	0.106664	0.224628	9.2712	20.7496	LPL
Regulation Of Actin Cytoskeleton WP51	2/150	0.108914	0.224628	3.66105	8.11728	GNA12;RHOA
GABA Receptor Signaling WP4159	1/31	0.11002	0.224628	8.96171	19.7794	GABRB2
Prostaglandin And Leukotriene Metabolism In Senescence WP5122	1/31	0.11002	0.224628	8.96171	19.7794	PTGER3
Eicosanoid Metabolism Via Cyclooxygenases COX WP4719	1/31	0.11002	0.224628	8.96171	19.7794	ACOX1
13Q12 12 Copy Number Variation WP5406	1/32	0.113362	0.224628	8.67219	18.8808	RHOA
2Q11 2 Copy Number Variation Syndrome WP5221	1/32	0.113362	0.224628	8.67219	18.8808	RHOA
Mitochondrial Immune Response To SARS CoV 2 WP5038	1/33	0.116692	0.224628	8.40076	18.0466	TOMM70
Oxidative Stress Response WP408	1/33	0.116692	0.224628	8.40076	18.0466	GPX1
Alpha 6 Beta 4 Signaling WP244	1/33	0.116692	0.224628	8.40076	18.0466	RHOA
Tryptophan Metabolism WP465	1/33	0.116692	0.224628	8.40076	18.0466	ACAT1
Type I Collagen Synthesis Osteogenesis Imperfecta WP4786	1/33	0.116692	0.224628	8.40076	18.0466	PLOD2
Sudden Infant Death Syndrome SIDS Susceptibility Pathways WP706	2/157	0.117419	0.224628	3.49448	7.48519	HTR3A;SCN3B
Type 2 Papillary Renal Cell Carcinoma WP4241	1/34	0.12001	0.2247	8.14578	17.2705	EGLN1
Prostaglandin And Leukotriene Metabolism In Senescence WP5321	1/34	0.12001	0.2247	8.14578	17.2705	PTGER3
Cancer Pathways WP5434	4/507	0.122713	0.227342	2.17534	4.56366	EGLN1;PTGER3;GNA12;RHOA
Wnt Signaling In Kidney Disease WP4150	1/36	0.126609	0.232117	7.67954	15.8709	RHOA
Photodynamic Therapy Induced HIF 1 Survival Signaling WP3614	1/37	0.12989	0.233272	7.46584	15.2383	EGLN1
Serotonin HTR1 Group And FOS Pathway WP722	1/37	0.12989	0.233272	7.46584	15.2383	RHOA
G13 Signaling WP524	1/38	0.133159	0.23436	7.2637	14.6451	RHOA
Amyotrophic Lateral Sclerosis ALS WP2447	1/38	0.133159	0.23436	7.2637	14.6451	GPX1
PDGF Pathway WP2526	1/40	0.139661	0.238644	6.89051	13.5642	RHOA
Glycogen Synthesis And Degradation WP500	1/40	0.139661	0.238644	6.89051	13.5642	PGM1
Neural Crest Cell Migration During Development WP4564	1/40	0.139661	0.238644	6.89051	13.5642	RHOA
Eukaryotic Transcription Initiation WP405	1/42	0.146114	0.244828	6.55372	12.6052	GTF2E2
Fibrin Complement Receptor 3 Signaling WP4136	1/43	0.149323	0.244828	6.39736	12.1655	RHOA
Neural Crest Cell Migration In Cancer WP4565	1/43	0.149323	0.244828	6.39736	12.1655	RHOA
Vitamin A And Carotenoid Metabolism WP716	1/43	0.149323	0.244828	6.39736	12.1655	LPL
Metapathway Biotransformation Phase I And II WP702	2/183	0.150326	0.244828	2.98857	5.6632	NAA50;CYP4F3
Ras Signaling WP4223	2/184	0.151627	0.244828	2.972	5.60618	PLAAT3;RHOA
Envelope Proteins And Potential Roles In EDMD Physiopathology WP4535	1/46	0.158878	0.247991	5.96997	10.9825	RHOA
Chronic Hyperglycemia Impairment Of Neuron Function WP5283	1/46	0.158878	0.247991	5.96997	10.9825	MMP16
Aryl Hydrocarbon Receptor Pathway WP2586	1/46	0.158878	0.247991	5.96997	10.9825	LPL
Wnt Signaling WP363	1/47	0.16204	0.247991	5.83989	10.6281	RHOA
Cholesterol Metab With Bloch And Kandutsch Russell Pathways WP4718	1/47	0.16204	0.247991	5.83989	10.6281	ACSL4
Selenium Metabolism And Selenoproteins WP28	1/47	0.16204	0.247991	5.83989	10.6281	GPX1
Exercise Induced Circadian Regulation WP410	1/48	0.165189	0.250632	5.71535	10.2914	QKI
Netrin UNC5B Signaling WP4747	1/52	0.177672	0.267267	5.26603	9.09873	RHOA
Pathogenic Escherichia Coli Infection WP2272	1/55	0.186913	0.278786	4.97272	8.33981	RHOA
N Glycan Biosynthesis WP5153	1/57	0.193017	0.28547	4.79464	7.88709	DPM1
Thyroid Stimulating Hormone TSH Signaling WP2032	1/58	0.196051	0.287542	4.71029	7.67484	GNA12
Markers Of Kidney Cell Lineage WP5236	1/59	0.199075	0.289564	4.62884	7.4713	EGLN1
Oxidative Phosphorylation WP623	1/60	0.202087	0.291536	4.55016	7.27596	ATP5MF
T Cell Antigen Receptor TCR Pathway During Staph A. Infection WP3863	1/62	0.208079	0.295337	4.40053	6.90813	CHP1
TYROBP Causal Network In Microglia WP3945	1/62	0.208079	0.295337	4.40053	6.90813	GPX1
Ferroptosis WP4313	1/65	0.216982	0.305511	4.19362	6.4076	ACSL4
AGE RAGE Pathway WP2324	1/66	0.219928	0.307201	4.1289	6.25303	RHOA
Trans Sulfuration One Carbon Metabolism And Related Pathways WP2525	1/69	0.2287	0.309625	3.94614	5.82192	GPX1
Sterol Regulatory Element Binding Proteins SREBP Signaling WP1982	1/69	0.2287	0.309625	3.94614	5.82192	LPL
Urotensin II Mediated Signaling WP5158	1/69	0.2287	0.309625	3.94614	5.82192	RHOA
Folate Metabolism WP176	1/69	0.2287	0.309625	3.94614	5.82192	GPX1
Leptin Signaling WP2034	1/71	0.234494	0.315046	3.83301	5.55911	RHOA
Cholesterol Metabolism WP5304	1/72	0.237375	0.3165	3.77884	5.43439	LPL
Chromosomal And Microsatellite Instability In Colorectal Cancer WP4216	1/73	0.240245	0.317919	3.72616	5.31386	RHOA
Joubert Syndrome WP4656	1/76	0.248792	0.326772	3.57658	4.97551	RHOA
MicroRNAs In Cardiomyocyte Hypertrophy WP1544	1/83	0.268367	0.349871	3.27011	4.30149	RHOA
Selenium Micronutrient Network WP15	1/86	0.276602	0.357955	3.15421	4.05372	GPX1
Androgen Receptor Signaling WP138	1/87	0.279326	0.358842	3.11738	3.97583	RHOA
Pancreatic Adenocarcinoma Pathway WP4263	1/89	0.284745	0.36054	3.04622	3.82655	RHOA
TNF Alpha Signaling WP231	1/89	0.284745	0.36054	3.04622	3.82655	RFFL
P53 Transcriptional Gene Network WP4963	1/91	0.290123	0.362904	2.97823	3.68541	GPX1
Metabolic Epileptic Disorders WP5355	1/92	0.292797	0.362904	2.94535	3.6177	ACAT1
Corticotropin Releasing Hormone Signaling WP2355	1/92	0.292797	0.362904	2.94535	3.6177	RHOA
Hippo Signaling Regulation WP4540	1/98	0.308635	0.379859	2.76233	3.24738	RHOA
17Q12 Copy Number Variation Syndrome WP5287	1/100	0.313836	0.383578	2.70625	3.13623	RFFL
Wnt Signaling And Pluripotency WP399	1/101	0.316422	0.384071	2.67905	3.08273	RHOA
1P36 Copy Number Variation Syndrome WP5345	1/102	0.318999	0.384546	2.65239	3.03054	UBE2J2
NF1 Copy Number Variation Syndrome WP5366	1/104	0.324123	0.388065	2.60063	2.92996	RHOA
Electron Transport Chain OXPHOS System In Mitochondria WP111	1/105	0.326671	0.388473	2.57549	2.88147	ATP5MF
Nuclear Receptors Meta Pathway WP2882	2/314	0.329841	0.389611	1.72225	1.91023	CBR1;ACOX1
Thermogenesis WP4321	1/108	0.334257	0.389941	2.5029	2.74279	ACSL4
5Q35 Copy Number Variation WP5380	1/109	0.336767	0.389941	2.4796	2.69871	ABHD5
DNA Damage Response Only ATM Dependent WP710	1/109	0.336767	0.389941	2.4796	2.69871	RHOA
CAMKK2 Pathway WP4874	1/110	0.339268	0.390269	2.45673	2.65564	NEDD4L
HDAC6 Interactions In The Central Nervous System WP5426	1/112	0.344242	0.393419	2.41222	2.57242	PRKN
Wnt Signaling WP428	1/113	0.346715	0.393689	2.39056	2.53221	RHOA
Gastrin Signaling WP4659	1/115	0.351633	0.396714	2.34839	2.45446	RHOA
22Q11 2 Copy Number Variation Syndrome WP4657	1/119	0.36136	0.400146	2.26832	2.30888	PRKN
Spinal Cord Injury WP2431	1/119	0.36136	0.400146	2.26832	2.30888	RHOA
Effect Of Omega 3 PUFA On Huntington 39 S Disease Pathways WP5470	1/120	0.363769	0.400146	2.24915	2.27442	GABRB2
DNA Repair Pathways Full Network WP4946	1/120	0.363769	0.400146	2.24915	2.27442	RAD54B
Fragile X Syndrome WP4549	1/122	0.368561	0.402899	2.21175	2.20766	GABRB2
Ebola Virus Infection In Host WP4217	1/129	0.385053	0.418329	2.09005	1.9947	RHOA
Adipogenesis WP236	1/131	0.389686	0.420672	2.05769	1.9392	LPL
Angiopoietin Like Protein 8 Regulatory Pathway WP3915	1/132	0.39199	0.420672	2.04188	1.91226	LPL
2Q37 Copy Number Variation Syndrome WP5224	1/136	0.40112	0.427861	1.98098	1.80962	MTERF4
Ectoderm Differentiation WP2858	1/138	0.405633	0.430069	1.95186	1.76118	PGM1
NRF2 Pathway WP2884	1/141	0.412341	0.434563	1.90975	1.69185	CBR1
Mesodermal Commitment Pathway WP2857	1/145	0.421169	0.438614	1.85633	1.6052	C9ORF72
Male Infertility WP4673	1/145	0.421169	0.438614	1.85633	1.6052	GPX1
Vitamin D Receptor Pathway WP2877	1/186	0.504441	0.522244	1.44193	0.986719	CCNC
Focal Adhesion WP306	1/199	0.528287	0.543734	1.34637	0.85914	RHOA
Ciliary Landscape WP4352	1/215	0.556086	0.569018	1.2447	0.730427	PSMD12
MAPK Signaling WP382	1/246	0.605427	0.615925	1.08549	0.544724	GNA12
Network Map Of SARS CoV 2 Signaling WP5115	1/254	0.617255	0.622245	1.05074	0.506954	TOMM70
Cytokine Cytokine Receptor Interaction WP5473	1/255	0.618709	0.622245	1.04655	0.502471	ACVR1C
GPCRs Class A Rhodopsin Like WP455	1/259	0.62447	0.62447	1.03012	0.485033	PTGER3

## Sheet: BioPlanet
Term	Overlap	P-value	Adjusted p-value	Odds Ratio	Combined Score	Genes
Low-density lipoprotein (LDL) pathway during atherogenesis	2/6	0.00020611	0.032661	136.445	1158.02	LPL;ACAT1
Fatty acid β-oxidation	3/34	0.000278767	0.032661	26.7392	218.864	LPL;ACSL4;ACAT1
Fatty acid, triacylglycerol, and ketone body metabolism	5/173	0.000483736	0.032661	8.40009	64.126	ACOX1;CCNC;ACSL4;MED7;ACAT1
Lipid and lipoprotein metabolism	8/489	0.000484403	0.032661	4.82676	36.8407	ACOX1;LPL;CCNC;ACSL4;ABHD5;CRLS1;MED7;ACAT1
Fatty acid metabolism	3/42	0.000523413	0.032661	21.2457	160.514	ACOX1;ACSL4;ACAT1
Stress fiber formation mediated by Rho-selective guanine exchange factor AKAP13	2/11	0.000746609	0.0388237	60.6271	436.513	GNA12;RHOA
S1P/S1P4 pathway	2/14	0.00122633	0.0525588	45.4635	304.775	GNA12;RHOA
Arachidonic acid metabolism	3/58	0.00134766	0.0525588	15.053	99.4913	CBR1;GPX1;CYP4F3
Ion channel transport	3/61	0.0015593	0.0540557	14.2723	92.2491	GABRB2;HTR3A;ATP9B
Signaling by TGF-beta receptor complex	3/66	0.0019562	0.0610334	13.1362	81.9275	NEDD4L;CCNC;RHOA
PPAR signaling pathway	3/69	0.00222187	0.0630203	12.5372	76.5951	ACOX1;LPL;ACSL4
Metabolism	14/1615	0.00246908	0.0641961	2.6268	15.7711	CBR1;CYB5A;GPX1;CYP4F3;LPL;CCNC;ACSL4;ABHD5;CRLS1;MED7;ACAT1;DPM1;ACOX1;PGM1
Transcriptional regulation of white adipocyte differentiation	3/77	0.00303635	0.0728725	11.1774	64.7963	LPL;CCNC;MED7
Proteasome complex	2/24	0.0036303	0.0767605	24.7858	139.258	PSMD12;PSMB5
Ghrelin pathway	2/25	0.00393644	0.0767605	23.707	131.277	LPL;ACAT1
Ligand-gated ion channel transport	2/25	0.00393644	0.0767605	23.707	131.277	GABRB2;HTR3A
Developmental biology	6/420	0.00492166	0.090327	4.09809	21.7777	ACVR1C;LPL;CCNC;SCN3B;RHOA;MED7
S1P/S1P3 pathway	2/29	0.00527599	0.0914505	20.1908	105.892	GNA12;RHOA
Lipid metabolism regulation by peroxisome proliferator-activated receptor alpha (PPAR-alpha)	3/112	0.00861729	0.141505	7.57492	36.0111	ACOX1;CCNC;MED7
Transcriptional activity of SMAD2/SMAD3-SMAD4 heterotrimer	2/41	0.0103516	0.161485	13.9698	63.8506	NEDD4L;CCNC
Lysine degradation	2/44	0.0118562	0.174659	12.97	57.5207	PLOD2;ACAT1
Polo-like kinase 1 (PLK1) pathway	2/46	0.0129093	0.174659	12.3792	53.8472	RAB1A;RHOA
Lipid digestion, mobilization, and transport	2/48	0.0140017	0.174659	11.8398	50.5391	LPL;ABHD5
Antigen presentation: folding, assembly, and peptide loading of class I MHC proteins	4/255	0.0154831	0.174659	4.41591	18.4056	PSMD12;PSMB5;NEDD4L;UBE2J2
Amyotrophic lateral sclerosis (ALS)	2/53	0.0169005	0.174659	10.6763	43.5639	GPX1;CHP1
Thrombin signaling through protease-activated receptors	2/53	0.0169005	0.174659	10.6763	43.5639	GNA12;RHOA
Axonal growth stimulation	1/5	0.0186116	0.174659	67.3007	268.124	RHOA
Ketone body metabolism	1/5	0.0186116	0.174659	67.3007	268.124	ACAT1
Cytochrome P450 metabolism of eicosanoids	1/5	0.0186116	0.174659	67.3007	268.124	CYP4F3
Thromboxane A2 receptor signaling	2/56	0.0187517	0.174659	10.0817	40.0895	GNA12;RHOA
TGF-beta regulation of extracellular matrix	6/565	0.0192811	0.174659	3.01252	11.8953	CYB5A;LPL;CCNC;PLOD2;ABCC9;ANG
Mechanism of gene regulation by peroxisome proliferators via PPAR-alpha	2/57	0.019387	0.174659	9.89788	39.0289	ACOX1;LPL
Autodegradation of Cdh1 by Cdh1-APC/C	2/58	0.0200313	0.174659	9.72065	38.0122	PSMD12;PSMB5
Neurotrophic factor-mediated Trk receptor signaling	2/60	0.0213464	0.174659	9.38451	36.101	NEDD4L;RHOA
Licensing factor removal from origins	2/61	0.0220172	0.174659	9.22498	35.2019	PSMD12;PSMB5
Cytochrome P450 pathway	2/61	0.0220172	0.174659	9.22498	35.2019	CYB5A;CYP4F3
G beta-gamma signaling through PI3K gamma	1/6	0.0222927	0.174659	53.8378	204.772	RHOA
Beta-oxidation of very long chain fatty acids	1/6	0.0222927	0.174659	53.8378	204.772	ACOX1
Proteasome degradation	2/63	0.0233846	0.174659	8.92163	33.5067	PSMD12;PSMB5
Ubiquitin-mediated degradation of phosphorylated Cdc25A	2/64	0.0240812	0.174659	8.77729	32.707	PSMD12;PSMB5
Endothelins	2/64	0.0240812	0.174659	8.77729	32.707	GNA12;RHOA
LPA receptor mediated events	2/65	0.0247863	0.174659	8.63753	31.937	GNA12;RHOA
HIF-1 transcriptional activity in hypoxia	2/66	0.0254997	0.174659	8.50214	31.1951	EGLN1;PGM1
Destabilization of mRNA by AUF1 (hnRNP D0)	2/66	0.0254997	0.174659	8.50214	31.1951	PSMD12;PSMB5
Activation of NF-kappaB in B cells	2/68	0.0269515	0.174659	8.24367	29.7903	PSMD12;PSMB5
Oncostatin M	4/311	0.0294556	0.174659	3.60013	12.69	LPL;NEDD4L;HTR3A;RNASE4
Glycogen biosynthesis	1/8	0.0296141	0.174659	38.4517	135.331	PGM1
Sema4D-mediated inhibition of cell attachment and migration	1/8	0.0296141	0.174659	38.4517	135.331	RHOA
Visceral fat deposits and the metabolic syndrome	1/8	0.0296141	0.174659	38.4517	135.331	LPL
Vitamin C (ascorbate) metabolism	1/8	0.0296141	0.174659	38.4517	135.331	CYB5A
Cyclin A-Cdk2-associated events at S phase entry	2/72	0.0299527	0.174659	7.77104	27.2619	PSMD12;PSMB5
Degradation of beta-catenin by the destruction complex	2/73	0.0307229	0.174659	7.6612	26.682	PSMD12;PSMB5
Prostanoid ligand receptors	1/9	0.0332545	0.174659	33.6436	114.508	PTGER3
Alpha-4 beta-7 integrin signaling	1/9	0.0332545	0.174659	33.6436	114.508	RHOA
Axonogenesis regulation by p75 neurotrophin receptor	1/9	0.0332545	0.174659	33.6436	114.508	RHOA
Ketone body biosynthesis and degradation	1/9	0.0332545	0.174659	33.6436	114.508	ACAT1
PI3K/AKT signalling	1/9	0.0332545	0.174659	33.6436	114.508	RHOA
PPAR-gamma coactivator role in obesity and thermogenesis	1/9	0.0332545	0.174659	33.6436	114.508	LPL
G alpha (12/13) signaling events	2/77	0.0338816	0.174659	7.25114	24.5443	GNA12;RHOA
Peroxisome	2/78	0.0346903	0.174659	7.15537	24.0513	ACOX1;ACSL4
Apoptosis regulation	2/78	0.0346903	0.174659	7.15537	24.0513	PSMD12;PSMB5
Antigen processing: cross presentation	2/79	0.0355065	0.174659	7.06209	23.5735	PSMD12;PSMB5
Free radical-induced apoptosis	1/10	0.0368814	0.174659	29.9039	98.6843	GPX1
Purine catabolism	1/10	0.0368814	0.174659	29.9039	98.6843	GPX1
NODAL signaling regulation	1/10	0.0368814	0.174659	29.9039	98.6843	ACVR1C
Amino acid metabolism	3/195	0.036947	0.174659	4.28234	14.1243	PSMD12;PSMB5;ACAT1
APC/C-mediated degradation of cell cycle proteins	2/82	0.0379996	0.176953	6.79623	22.2249	PSMD12;PSMB5
HIV infection	3/200	0.0393585	0.178226	4.17259	13.4985	PSMD12;PSMB5;GTF2E2
Alpha-linolenic (omega3) and linoleic (omega6) acid metabolism	1/11	0.0404949	0.178226	26.9122	86.296	ACOX1
Cardiac protection against reactive oxygen species	1/11	0.0404949	0.178226	26.9122	86.296	GPX1
TGF-beta regulation of skeletal system development	2/85	0.0405579	0.178226	6.5496	20.9916	ACVR1C;RHOA
mRNA stability regulation by proteins that bind AU-rich elements	2/86	0.0414248	0.178671	6.4713	20.6038	PSMD12;PSMB5
HIF-1 degradation in normoxia	2/88	0.0431795	0.178671	6.32017	19.8604	PSMD12;PSMB5
DNA replication pre-Initiation	2/88	0.0431795	0.178671	6.32017	19.8604	PSMD12;PSMB5
GABA (A) receptor activation	1/12	0.044095	0.178671	24.4644	76.3633	GABRB2
Rab GTPases mark targets in the endocytotic machinery	1/12	0.044095	0.178671	24.4644	76.3633	RAB1A
Hormone-sensitive lipase (HSL)-mediated triacylglycerol hydrolysis	1/12	0.044095	0.178671	24.4644	76.3633	ABHD5
Extracellular matrix organization	2/93	0.0476853	0.190741	5.9714	18.1718	MMP16;PLOD2
G-protein signaling pathways	2/95	0.0495339	0.195628	5.84239	17.557	GNA12;RHOA
Glycogen breakdown (glycogenolysis)	1/14	0.0512553	0.199896	20.6985	61.494	PGM1
Downstream signaling events Of B cell receptor (BCR)	2/98	0.0523549	0.201206	5.65896	16.6923	PSMD12;PSMB5
Arf6 vesicle-mediated transport	1/15	0.0548156	0.201206	19.2191	55.8081	RHOA
Terpenoid backbone biosynthesis	1/15	0.0548156	0.201206	19.2191	55.8081	ACAT1
Mu-calpain pathway	1/15	0.0548156	0.201206	19.2191	55.8081	RHOA
Eicosanoid ligand-binding G-protein coupled receptors	1/15	0.0548156	0.201206	19.2191	55.8081	PTGER3
Protein kinase A (PKA) at the centrosome	1/16	0.0583627	0.204597	17.9369	50.9602	RHOA
TGF-beta receptor signaling in EMT (epithelial to mesenchymal transition)	1/16	0.0583627	0.204597	17.9369	50.9602	RHOA
N-glycan precursor substrate biosynthesis	1/16	0.0583627	0.204597	17.9369	50.9602	DPM1
PI3K subunit p85 role in regulation of actin organization and cell migration	1/16	0.0583627	0.204597	17.9369	50.9602	RHOA
Acyl chain remodelling of phosphatidylglycerol	1/17	0.0618967	0.20991	16.815	46.7843	CRLS1
Branched-chain amino acid catabolism	1/17	0.0618967	0.20991	16.815	46.7843	ACAT1
Chylomicron-mediated lipid transport	1/17	0.0618967	0.20991	16.815	46.7843	LPL
Apoptosis	3/242	0.0626454	0.210165	3.43201	9.50757	PSMD12;PSMB5;CHP1
Fatty acyl-CoA biosynthesis	1/18	0.0654175	0.215047	15.8251	43.1545	ACSL4
S phase	2/112	0.0662381	0.215047	4.93524	13.3967	PSMD12;PSMB5
Alpha-linolenic acid metabolism	1/19	0.0689254	0.215047	14.9452	39.9744	ACOX1
Hypoxic and oxygen homeostasis regulation of HIF-1-alpha	1/19	0.0689254	0.215047	14.9452	39.9744	EGLN1
Signaling by NODAL	1/19	0.0689254	0.215047	14.9452	39.9744	ACVR1C
Small ligand GPCRs	1/19	0.0689254	0.215047	14.9452	39.9744	PTGER3
MAL role in Rho-mediated activation of SRF	1/19	0.0689254	0.215047	14.9452	39.9744	RHOA
Vascular smooth muscle contraction	2/116	0.070408	0.215481	4.76112	12.6334	GNA12;RHOA
Gene expression	7/968	0.0704457	0.215481	2.0314	5.38913	PSMD12;PSMB5;PPA2;NEDD4L;CCNC;GTF2E2;MED7
Cell cycle checkpoints	2/117	0.0714637	0.216472	4.71948	12.4526	PSMD12;PSMB5
Peroxisomal lipid metabolism	1/20	0.0724202	0.217261	14.1579	37.1683	ACOX1
S1P/S1P1 pathway	1/21	0.0759021	0.217261	13.4493	34.6765	RHOA
Biosynthesis of unsaturated fatty acids	1/21	0.0759021	0.217261	13.4493	34.6765	ACOX1
Mitochondrial tRNA aminoacylation	1/21	0.0759021	0.217261	13.4493	34.6765	PPA2
E-cadherin keratinocyte pathway	1/21	0.0759021	0.217261	13.4493	34.6765	RHOA
PKC-catalyzed phosphorylation of inhibitory phosphoprotein of myosin phosphatase	1/21	0.0759021	0.217261	13.4493	34.6765	GNA12
Transmembrane transport of small molecules	4/432	0.0791041	0.218682	2.56641	6.51095	GABRB2;ABCC9;HTR3A;ATP9B
RNA polymerase II promoter escape	1/22	0.0793711	0.218682	12.8082	32.4512	GTF2E2
CCR3 signaling in eosinophils	1/22	0.0793711	0.218682	12.8082	32.4512	RHOA
Rho cell motility signaling pathway	1/23	0.0828273	0.218682	12.2254	30.4535	RHOA
Signaling events mediated by PRL	1/23	0.0828273	0.218682	12.2254	30.4535	RHOA
Collagen binding in corneal epithelia mediated by Erk and PI-3 Kinase	1/23	0.0828273	0.218682	12.2254	30.4535	RHOA
Mitochondrial fatty acid beta-oxidation	1/23	0.0828273	0.218682	12.2254	30.4535	ACSL4
Downregulation of SMAD2/3-SMAD4 transcriptional activity	1/23	0.0828273	0.218682	12.2254	30.4535	NEDD4L
Eicosanoid metabolism	1/23	0.0828273	0.218682	12.2254	30.4535	PTGER3
HIV factor interactions with host	2/128	0.0834076	0.218682	4.30507	10.6939	PSMD12;PSMB5
Triacylglyceride biosynthesis	1/24	0.0862706	0.220744	11.6933	28.6517	LPL
Endogenous Toll-like receptor signaling	1/24	0.0862706	0.220744	11.6933	28.6517	RHOA
Cellular response to hypoxia	1/25	0.0897012	0.220744	11.2055	27.0195	EGLN1
Fatty acid biosynthesis	1/25	0.0897012	0.220744	11.2055	27.0195	ACSL4
Mitotic G1-G1/S phases	2/135	0.0913043	0.220744	4.07704	9.75863	PSMD12;PSMB5
Ubiquitin-mediated proteolysis	2/136	0.09245	0.220744	4.04641	9.63486	NEDD4L;UBE2J2
Galactose metabolism	1/26	0.0931191	0.220744	10.7568	25.5352	PGM1
Physiological and pathological hypertrophy of the heart	1/26	0.0931191	0.220744	10.7568	25.5352	RHOA
Ras signaling pathway	1/26	0.0931191	0.220744	10.7568	25.5352	RHOA
Interaction between L1-type proteins and ankyrins	1/26	0.0931191	0.220744	10.7568	25.5352	SCN3B
TGF-beta signaling in development	1/26	0.0931191	0.220744	10.7568	25.5352	ACVR1C
T cell receptor signaling pathway	2/139	0.0959122	0.220744	3.9572	9.27696	CHP1;RHOA
p53 signaling pathway	2/139	0.0959122	0.220744	3.9572	9.27696	GPX1;SCN3B
Pentose phosphate pathway	1/27	0.0965243	0.220744	10.3425	24.1804	PGM1
Glucuronidation	1/27	0.0965243	0.220744	10.3425	24.1804	PGM1
TWEAK regulation of gene expression	1/27	0.0965243	0.220744	10.3425	24.1804	MMP16
Interleukin-2 signaling pathway	6/847	0.0978591	0.220744	1.97322	4.58621	CYB5A;MMP16;PTGER3;HTR3A;ANG;RHOA
G-protein beta-gamma signalling	1/28	0.0999169	0.220744	9.95896	22.9396	RHOA
TGF-beta receptor activation of SMADs	1/28	0.0999169	0.220744	9.95896	22.9396	NEDD4L
Post-translational modification: biosynthesis of GPI-anchored proteins	1/29	0.103297	0.220744	9.6028	21.7998	DPM1
Homologous recombination	1/29	0.103297	0.220744	9.6028	21.7998	RAD54B
Influence of Ras and Rho proteins on G1 to S transition	1/29	0.103297	0.220744	9.6028	21.7998	RHOA
Sema4D in semaphorin signaling	1/29	0.103297	0.220744	9.6028	21.7998	RHOA
Lipoprotein metabolism	1/29	0.103297	0.220744	9.6028	21.7998	LPL
Statin pathway	1/29	0.103297	0.220744	9.6028	21.7998	LPL
T cell receptor calcium pathway	1/29	0.103297	0.220744	9.6028	21.7998	CHP1
Matrix metalloproteinases	1/29	0.103297	0.220744	9.6028	21.7998	MMP16
Activation of matrix metalloproteinases	1/30	0.106664	0.223097	9.2712	20.7496	MMP16
Biosynthesis of the N-glycan precursor (dolichol lipid-linked oligosaccharide, LLO) and transfer to a nascent protein	1/30	0.106664	0.223097	9.2712	20.7496	DPM1
Butanoate metabolism	1/30	0.106664	0.223097	9.2712	20.7496	ACAT1
Prostaglandin biosynthesis and regulation	1/31	0.11002	0.223097	8.96171	19.7794	PTGER3
Alpha-6 beta-4 integrin signaling pathway	1/31	0.11002	0.223097	8.96171	19.7794	RHOA
Alpha-V beta-3 integrin/OPN pathway	1/31	0.11002	0.223097	8.96171	19.7794	RHOA
Inwardly rectifying potassium channels	1/31	0.11002	0.223097	8.96171	19.7794	ABCC9
Signaling by the B cell receptor (BCR)	2/151	0.110118	0.223097	3.6363	8.0224	PSMD12;PSMB5
Serotonin HTR1 group and FOS pathway	1/32	0.113362	0.224982	8.67219	18.8808	RHOA
Syndecan 4 pathway	1/32	0.113362	0.224982	8.67219	18.8808	RHOA
Netrin-mediated signaling events	1/32	0.113362	0.224982	8.67219	18.8808	RHOA
MAPK signaling pathway	3/314	0.113933	0.224982	2.62781	5.70799	ACVR1C;GNA12;CHP1
Propanoate metabolism	1/33	0.116692	0.226137	8.40076	18.0466	ACAT1
Glycoprotein VI-mediated activation cascade	1/33	0.116692	0.226137	8.40076	18.0466	RHOA
Syndecan 2 pathway	1/33	0.116692	0.226137	8.40076	18.0466	RHOA
HIF-2-alpha transcription factor network	1/34	0.12001	0.226928	8.14578	17.2705	EGLN1
N-cadherin signaling events	1/34	0.12001	0.226928	8.14578	17.2705	RHOA
EGF receptor transactivation by GPCRs in cardiac hypertrophy	1/34	0.12001	0.226928	8.14578	17.2705	RHOA
Ephrin receptor A forward pathway	1/34	0.12001	0.226928	8.14578	17.2705	RHOA
Axon guidance	3/325	0.122857	0.230386	2.53662	5.31861	CHP1;SCN3B;RHOA
Basal transcription factors	1/35	0.123316	0.230386	7.9058	16.5469	GTF2E2
Purine metabolism	2/164	0.126087	0.231006	3.3423	6.92118	GPX1;PGM1
Phospholipids as signaling intermediaries	1/36	0.126609	0.231006	7.67954	15.8709	RHOA
Glycogen metabolism	1/36	0.126609	0.231006	7.67954	15.8709	PGM1
Ion transport by P-type ATPases	1/36	0.126609	0.231006	7.67954	15.8709	ATP9B
PI3K/AKT activation	1/37	0.12989	0.235148	7.46584	15.2383	RHOA
Alzheimer's disease	2/169	0.13237	0.235148	3.24141	6.55463	CHP1;LPL
Trefoil factor initiation of mucosal healing	1/38	0.133159	0.235148	7.2637	14.6451	RHOA
Triglyceride biosynthesis	1/38	0.133159	0.235148	7.2637	14.6451	ACSL4
G13 signaling pathway	1/39	0.136416	0.235148	7.07219	14.0881	RHOA
HIV-1 transcription initiation	1/39	0.136416	0.235148	7.07219	14.0881	GTF2E2
Aurora B signaling	1/39	0.136416	0.235148	7.07219	14.0881	RHOA
Signaling events regulated by Ret tyrosine kinase	1/39	0.136416	0.235148	7.07219	14.0881	RHOA
E-cadherin nascent AJ-like junctions pathway	1/39	0.136416	0.235148	7.07219	14.0881	RHOA
Vitamin A and carotenoid metabolism	1/39	0.136416	0.235148	7.07219	14.0881	LPL
Metapathway biotransformation	2/174	0.138724	0.237813	3.14638	6.21495	NAA50;CYP4F3
Plasma membrane estrogen receptor signaling	1/41	0.142894	0.242298	6.71791	13.0707	RHOA
Alpha-M beta-2 integrin signaling	1/41	0.142894	0.242298	6.71791	13.0707	RHOA
Calcium signaling pathway	2/178	0.143855	0.24261	3.07425	5.96081	PTGER3;CHP1
Aldosterone-regulated sodium reabsorption	1/42	0.146114	0.243784	6.55372	12.6052	NEDD4L
Eukaryotic transcription initiation	1/42	0.146114	0.243784	6.55372	12.6052	GTF2E2
PI3K class IB pathway in neutrophils	1/43	0.149323	0.247813	6.39736	12.1655	RHOA
Valine, leucine and isoleucine degradation	1/44	0.15252	0.251127	6.24827	11.7496	ACAT1
TGF-beta signaling pathway	2/185	0.15293	0.251127	2.95561	5.54997	NEDD4L;RHOA
Amino sugar and nucleotide sugar metabolism	1/45	0.155705	0.253021	6.10596	11.3558	PGM1
RhoA signaling pathway	1/45	0.155705	0.253021	6.10596	11.3558	RHOA
RhoA activity regulation	1/46	0.158878	0.255516	5.96997	10.9825	RHOA
Transfer RNA aminoacylation	1/46	0.158878	0.255516	5.96997	10.9825	PPA2
ABC transporters	1/47	0.16204	0.257941	5.83989	10.6281	ABCC9
Regulation of transcription by NOTCH1 intracellular domain	1/47	0.16204	0.257941	5.83989	10.6281	CCNC
Post-translational regulation of adherens junction stability and disassembly	1/48	0.165189	0.258991	5.71535	10.2914	GNA12
N-glycan biosynthesis	1/48	0.165189	0.258991	5.71535	10.2914	DPM1
Diurnally regulated genes with circadian orthologs	1/48	0.165189	0.258991	5.71535	10.2914	QKI
Generic transcription pathway	3/377	0.168184	0.259991	2.17814	3.88296	NEDD4L;CCNC;MED7
G alpha 12 pathway	1/49	0.168328	0.259991	5.596	9.9712	RHOA
Glycerolipid metabolism	1/49	0.168328	0.259991	5.596	9.9712	LPL
Endocytosis	2/201	0.174069	0.265685	2.71577	4.74799	NEDD4L;RHOA
Glutathione metabolism	1/51	0.174569	0.265685	5.37162	9.37582	GPX1
Metabolism of vitamins and cofactors	1/51	0.174569	0.265685	5.37162	9.37582	CYB5A
Pyruvate metabolism	1/52	0.177672	0.267796	5.26603	9.09873	ACAT1
Signaling events mediated by PTP1B	1/52	0.177672	0.267796	5.26603	9.09873	RHOA
Platelet activation, signaling and aggregation	2/205	0.179428	0.268563	2.66172	4.57278	GNA12;RHOA
GABA A and B receptor activation	1/53	0.180764	0.268563	5.1645	8.83421	GABRB2
Starch and sucrose metabolism	1/53	0.180764	0.268563	5.1645	8.83421	PGM1
DNA replication	2/207	0.182117	0.269292	2.63548	4.4885	PSMD12;PSMB5
Calcineurin-dependent NFAT signaling role in lymphocytes	1/55	0.186913	0.27508	4.97272	8.33981	CHP1
Adaptive immune system	4/606	0.192503	0.280099	1.80834	2.97949	PSMD12;PSMB5;NEDD4L;UBE2J2
Pathogenic Escherichia coli infection	1/57	0.193017	0.280099	4.79464	7.88709	RHOA
SHP2 signaling	1/57	0.193017	0.280099	4.79464	7.88709	RHOA
Tryptophan metabolism	1/58	0.196051	0.283185	4.71029	7.67484	ACAT1
Glucose metabolism	1/61	0.205089	0.292181	4.4741	7.08838	PGM1
HIV genome transcription	1/61	0.205089	0.292181	4.4741	7.08838	GTF2E2
Leptin signaling pathway	1/61	0.205089	0.292181	4.4741	7.08838	RHOA
Actin cytoskeleton regulation	2/226	0.207941	0.292435	2.40961	3.7843	GNA12;RHOA
Signaling events mediated by focal adhesion kinase	1/62	0.208079	0.292435	4.40053	6.90813	RHOA
Colorectal cancer	1/62	0.208079	0.292435	4.40053	6.90813	RHOA
Angiotensin II-stimulated signaling through G-proteins and beta-arrestin	1/64	0.214025	0.297862	4.2604	6.5681	RHOA
Collagen biosynthesis and modifying enzymes	1/64	0.214025	0.297862	4.2604	6.5681	PLOD2
Wnt signaling pathway	2/231	0.214804	0.297862	2.3564	3.62421	CHP1;RHOA
Semaphorin interactions	1/66	0.219928	0.30228	4.1289	6.25303	RHOA
Thyroid-stimulating hormone signaling pathway	1/66	0.219928	0.30228	4.1289	6.25303	GNA12
G alpha 13 pathway	1/67	0.222863	0.303639	4.06613	6.10407	RHOA
Adipocytokine signaling pathway	1/67	0.222863	0.303639	4.06613	6.10407	ACSL4
Phase I of biological oxidations: functionalization of compounds	1/69	0.2287	0.30749	3.94614	5.82192	CYP4F3
Renal cell carcinoma	1/70	0.231603	0.30749	3.88876	5.68821	EGLN1
Signaling events mediated by VEGFR1 and VEGFR2	1/70	0.231603	0.30749	3.88876	5.68821	RHOA
Long-term depression	1/70	0.231603	0.30749	3.88876	5.68821	GNA12
Long-term potentiation	1/70	0.231603	0.30749	3.88876	5.68821	CHP1
Nucleotide metabolism	1/70	0.231603	0.30749	3.88876	5.68821	GPX1
Bacterial invasion of epithelial cells	1/71	0.234494	0.310009	3.83301	5.55911	RHOA
Signaling by NOTCH1	1/73	0.240245	0.316036	3.72616	5.31386	CCNC
Adherens junction cell adhesion	1/74	0.243105	0.316036	3.67494	5.19732	RHOA
Integrins in angiogenesis	1/74	0.243105	0.316036	3.67494	5.19732	RHOA
Seven transmembrane receptor signaling through beta-arrestin	1/74	0.243105	0.316036	3.67494	5.19732	RHOA
Glycolysis and gluconeogenesis	1/75	0.245954	0.318413	3.62509	5.0846	PGM1
VEGF signaling pathway	1/76	0.248792	0.320757	3.57658	4.97551	CHP1
Glycerophospholipid metabolism	1/79	0.257244	0.327592	3.4385	4.66855	CRLS1
Signaling events mediated by hepatocyte growth factor receptor (c-Met)	1/79	0.257244	0.327592	3.4385	4.66855	RHOA
p73 transcription factor network	1/79	0.257244	0.327592	3.4385	4.66855	NEDD4L
Antigen processing and presentation	1/81	0.262826	0.333341	3.3522	4.47941	PSMB5
ATM-dependent DNA damage response	1/82	0.265602	0.335497	3.31064	4.38911	RHOA
Neuroactive ligand-receptor interaction	2/272	0.271646	0.340424	1.99442	2.59923	GABRB2;PTGER3
Asparagine N-linked glycosylation	1/85	0.273867	0.340424	3.19192	4.1339	DPM1
MicroRNAs in cardiomyocyte hypertrophy	1/85	0.273867	0.340424	3.19192	4.1339	RHOA
Myc active pathway	1/85	0.273867	0.340424	3.19192	4.1339	PEG10
Glycerophospholipid biosynthesis	1/86	0.276602	0.342459	3.15421	4.05372	CRLS1
Androgen receptor signaling, proteolysis, and transcription regulation	1/88	0.282041	0.347813	3.08139	3.90013	RHOA
Neuronal system	2/283	0.286947	0.35247	1.91527	2.39114	GABRB2;ABCC9
L1CAM interactions	1/94	0.298116	0.364754	2.88172	3.48767	SCN3B
Wnt signaling pathway and pluripotency	1/98	0.308635	0.376149	2.76233	3.24738	RHOA
Potassium channels	1/99	0.31124	0.377848	2.734	3.1911	ABCC9
Pancreatic secretion	1/101	0.316422	0.379707	2.67905	3.08273	RHOA
RNA polymerase II transcription	1/101	0.316422	0.379707	2.67905	3.08273	GTF2E2
TNF-alpha signaling pathway	1/101	0.316422	0.379707	2.67905	3.08273	RFFL
Leptin influence on immune response	1/110	0.339268	0.405562	2.45673	2.65564	ACAT1
Epidermal growth factor receptor (EGFR) pathway	1/111	0.341759	0.406981	2.43428	2.61356	RHOA
Pathways in cancer	2/325	0.344917	0.408207	1.66267	1.76983	EGLN1;RHOA
Oocyte meiosis	1/113	0.346715	0.408207	2.39056	2.53221	CHP1
mTOR signaling pathway	1/113	0.346715	0.408207	2.39056	2.53221	RHOA
CXCR4 signaling pathway	1/116	0.354078	0.41531	2.32785	2.41686	RHOA
Leukocyte transendothelial migration	1/117	0.356515	0.416601	2.30767	2.38008	RHOA
HIV life cycle	1/118	0.358942	0.417873	2.28783	2.34409	GTF2E2
Signaling by NOTCH	1/119	0.36136	0.419124	2.26832	2.30888	CCNC
Notch signaling pathway	1/121	0.36617	0.423129	2.23029	2.24068	CCNC
Rho GTPase cycle	1/123	0.370943	0.427064	2.19351	2.17532	RHOA
p75 neurotrophin receptor-mediated signaling	1/124	0.373317	0.428216	2.17557	2.14364	RHOA
Interleukin-1 signaling pathway	1/125	0.375682	0.42935	2.15791	2.11262	UBE2J2
Neurotrophin signaling pathway	1/126	0.378038	0.430466	2.14054	2.08224	RHOA
PDGFB signaling pathway	1/129	0.385053	0.43686	2.09005	1.9947	RHOA
Parkinson's disease	1/131	0.389686	0.440515	2.05769	1.9392	UBE2J2
Adipogenesis	1/133	0.394285	0.442507	2.02631	1.88585	LPL
Tight junction	1/133	0.394285	0.442507	2.02631	1.88585	RHOA
TNF-alpha effects on cytokine activity, cell motility, and apoptosis	1/135	0.39885	0.445371	1.99587	1.83454	GPX1
NGF signaling via TRKA from the plasma membrane	1/136	0.40112	0.445371	1.98098	1.80962	RHOA
Oxidative phosphorylation	1/136	0.40112	0.445371	1.98098	1.80962	PPA2
Natural killer cell-mediated cytotoxicity	1/137	0.403381	0.446294	1.96632	1.78517	CHP1
Biological oxidations	1/139	0.407878	0.449674	1.93762	1.73764	CYP4F3
EGFR1 pathway	1/152	0.436305	0.47932	1.76964	1.46777	CCNC
Integrin signaling pathway	1/155	0.442671	0.484608	1.73491	1.41383	RHOA
Toll receptor cascades	1/159	0.451049	0.492054	1.69064	1.34605	UBE2J2
Protein processing in the endoplasmic reticulum	1/166	0.465413	0.504578	1.61835	1.23776	UBE2J2
Disease	3/674	0.465764	0.504578	1.1956	0.913531	PSMD12;PSMB5;GTF2E2
Transcription	1/181	0.494956	0.534347	1.48236	1.04252	GTF2E2
Huntington's disease	1/184	0.500668	0.53865	1.45783	1.00855	GPX1
Cell cycle	2/453	0.509252	0.544982	1.183	0.798304	PSMD12;PSMB5
Chemokine signaling pathway	1/189	0.510047	0.544982	1.4187	0.955146	RHOA
Transmission across chemical synapses	1/190	0.511902	0.545097	1.41113	0.944921	GABRB2
Immune system	4/998	0.518894	0.550663	1.07297	0.70393	PSMD12;PSMB5;NEDD4L;UBE2J2
Post-translational protein modification	1/196	0.522886	0.553019	1.36729	0.886539	DPM1
Hemostasis pathway	2/468	0.526775	0.554968	1.14404	0.73331	GNA12;RHOA
G alpha (i) signaling events	1/199	0.528287	0.554968	1.34637	0.85914	PTGER3
Phospholipid metabolism	1/205	0.538907	0.564225	1.30637	0.807615	CRLS1
Antigen-activated B-cell receptor generation of second messengers	1/211	0.549292	0.573174	1.26866	0.760088	CHP1
Signaling by NGF	1/221	0.566089	0.588732	1.21038	0.688712	RHOA
Focal adhesion	1/233	0.585432	0.606826	1.14708	0.614151	RHOA
Carbohydrate metabolism	1/235	0.588572	0.608061	1.13716	0.602757	PGM1
Class A GPCRs (rhodopsin-like)	1/253	0.615796	0.634087	1.05497	0.511489	PTGER3
BDNF signaling pathway	1/261	0.627318	0.643826	1.02209	0.476602	PEG10
FSH regulation of apoptosis	1/263	0.630145	0.644607	1.01418	0.468356	RAB1A
Interleukin-4 regulation of apoptosis	1/267	0.635735	0.6482	0.99873	0.452398	LPL
Insulin signaling pathway	1/277	0.649348	0.659924	0.962054	0.415402	RHOA
T cell receptor regulation of apoptosis	2/603	0.665208	0.673847	0.880906	0.359106	PSMD12;STRN3
Signaling by GPCR	3/977	0.716067	0.723019	0.810703	0.27076	PTGER3;GNA12;RHOA
Signal transduction	3/1020	0.743257	0.748052	0.774664	0.229853	GNA12;NEDD4L;CCNC
GPCR ligand binding	1/410	0.789103	0.79164	0.644816	0.15273	PTGER3
Protein metabolism	1/442	0.813482	0.813482	0.597046	0.123249	DPM1

## Sheet: KEGG
Term	Overlap	P-value	Adjusted p-value	Odds Ratio	Combined Score	Genes
Arachidonic acid metabolism	4/61	8.09519e-05	0.00947138	19.6373	185.016	CBR1;GPX1;CYP4F3;PLAAT3
Fatty acid degradation	3/43	0.000561158	0.0328278	20.7135	155.051	ACOX1;ACSL4;ACAT1
Regulation of lipolysis in adipocytes	3/55	0.0011551	0.0450488	15.9239	107.702	PTGER3;PLAAT3;ABHD5
Amyotrophic lateral sclerosis	6/364	0.00244396	0.063471	4.75273	28.5836	PRKN;RAB1A;PSMD12;GPX1;PSMB5;ANG
PPAR signaling pathway	3/74	0.00271244	0.063471	11.6514	68.8587	ACOX1;LPL;ACSL4
alpha-Linolenic acid metabolism	2/25	0.00393644	0.0767605	23.707	131.277	ACOX1;PLAAT3
Propanoate metabolism	2/34	0.00720265	0.108392	17.0317	84.0225	ACOX1;ACAT1
Parathyroid hormone synthesis, secretion and action	3/106	0.00741142	0.108392	8.01861	39.3291	MMP16;GNA12;RHOA
Pathways of neurodegeneration	6/475	0.00880516	0.114467	3.60731	17.0713	PRKN;RAB1A;PSMD12;GPX1;PSMB5;UBE2J2
Proteasome	2/46	0.0129093	0.151038	12.3792	53.8472	PSMD12;PSMB5
Parkinson disease	4/249	0.0143052	0.152156	4.52544	19.2201	PRKN;PSMD12;PSMB5;UBE2J2
Ubiquitin mediated proteolysis	3/140	0.0157101	0.153174	6.01825	24.9965	PRKN;NEDD4L;UBE2J2
Lysine degradation	2/63	0.0233846	0.210462	8.92163	33.5067	PLOD2;ACAT1
Protein processing in endoplasmic reticulum	3/171	0.0264804	0.221301	4.90005	17.7938	PRKN;UBXN8;UBE2J2
Synthesis and degradation of ketone bodies	1/10	0.0368814	0.261527	29.9039	98.6843	ACAT1
Pathogenic Escherichia coli infection	3/197	0.0379022	0.261527	4.23776	13.8691	RAB1A;GNA12;RHOA
Peroxisome	2/82	0.0379996	0.261527	6.79623	22.2249	ACOX1;ACSL4
cAMP signaling pathway	3/216	0.0475997	0.292947	3.85603	11.7413	ACOX1;PTGER3;RHOA
TGF-beta signaling pathway	2/94	0.0486064	0.292947	5.90619	17.8603	ACVR1C;RHOA
Glycerophospholipid metabolism	2/98	0.0523549	0.292947	5.65896	16.6923	PLAAT3;CRLS1
Human cytomegalovirus infection	3/225	0.0525803	0.292947	3.69801	10.8922	PTGER3;GNA12;RHOA
Fatty acid biosynthesis	1/18	0.0654175	0.328854	15.8251	43.1545	ACSL4
Serotonergic synapse	2/113	0.0672725	0.328854	4.89053	13.1996	GABRB2;HTR3A
Sphingolipid signaling pathway	2/119	0.0735906	0.328854	4.63833	12.1025	GNA12;RHOA
Terpenoid backbone biosynthesis	1/22	0.0793711	0.328854	12.8082	32.4512	ACAT1
Vascular smooth muscle contraction	2/133	0.0890259	0.328854	4.13971	10.0132	GNA12;RHOA
Oxidative phosphorylation	2/133	0.0890259	0.328854	4.13971	10.0132	PPA2;ATP5MF
Systemic lupus erythematosus	2/135	0.0913043	0.328854	4.07704	9.75863	H2AC19;H2AC18
Folate biosynthesis	1/26	0.0931191	0.328854	10.7568	25.5352	CBR1
Biosynthesis of unsaturated fatty acids	1/27	0.0965243	0.328854	10.3425	24.1804	ACOX1
Butanoate metabolism	1/28	0.0999169	0.328854	9.95896	22.9396	ACAT1
Spinocerebellar ataxia	2/143	0.100586	0.328854	3.84417	8.82907	PSMD12;PSMB5
Linoleic acid metabolism	1/29	0.103297	0.328854	9.6028	21.7998	PLAAT3
Phospholipase D signaling pathway	2/148	0.106516	0.328854	3.71158	8.31194	GNA12;RHOA
beta-Alanine metabolism	1/30	0.106664	0.328854	9.2712	20.7496	ACOX1
Glyoxylate and dicarboxylate metabolism	1/30	0.106664	0.328854	9.2712	20.7496	ACAT1
Pentose phosphate pathway	1/30	0.106664	0.328854	9.2712	20.7496	PGM1
Huntington disease	3/306	0.107607	0.328854	2.69829	6.01522	PSMD12;GPX1;PSMB5
Galactose metabolism	1/31	0.11002	0.328854	8.96171	19.7794	PGM1
Necroptosis	2/159	0.11988	0.328854	3.44961	7.31755	H2AC19;H2AC18
Starch and sucrose metabolism	1/36	0.126609	0.328854	7.67954	15.8709	PGM1
cGMP-PKG signaling pathway	2/167	0.129848	0.328854	3.28103	6.69787	GNA12;RHOA
Aldosterone-regulated sodium reabsorption	1/37	0.12989	0.328854	7.46584	15.2383	NEDD4L
Tight junction	2/169	0.13237	0.328854	3.24141	6.55463	NEDD4L;RHOA
Pathways in cancer	4/531	0.138485	0.328854	2.07371	4.0997	EGLN1;PTGER3;GNA12;RHOA
Nicotine addiction	1/40	0.139661	0.328854	6.89051	13.5642	GABRB2
Ferroptosis	1/41	0.142894	0.328854	6.71791	13.0707	ACSL4
Homologous recombination	1/41	0.142894	0.328854	6.71791	13.0707	RAD54B
Tryptophan metabolism	1/42	0.146114	0.328854	6.55372	12.6052	ACAT1
Fat digestion and absorption	1/43	0.149323	0.328854	6.39736	12.1655	ACAT1
Alcoholism	2/186	0.154236	0.328854	2.9394	5.49454	H2AC19;H2AC18
ABC transporters	1/45	0.155705	0.328854	6.10596	11.3558	ABCC9
Basal transcription factors	1/45	0.155705	0.328854	6.10596	11.3558	GTF2E2
Neutrophil extracellular trap formation	2/189	0.158166	0.328854	2.8918	5.3328	H2AC19;H2AC18
Alzheimer disease	3/369	0.160908	0.328854	2.22666	4.06793	PSMD12;PSMB5;LPL
Pyruvate metabolism	1/47	0.16204	0.328854	5.83989	10.6281	ACAT1
Amino sugar and nucleotide sugar metabolism	1/48	0.165189	0.328854	5.71535	10.2914	PGM1
Valine, leucine and isoleucine degradation	1/48	0.165189	0.328854	5.71535	10.2914	ACAT1
Ether lipid metabolism	1/49	0.168328	0.328854	5.596	9.9712	PLAAT3
Cholesterol metabolism	1/50	0.171454	0.328854	5.48152	9.66634	LPL
N-Glycan biosynthesis	1/50	0.171454	0.328854	5.48152	9.66634	DPM1
Viral carcinogenesis	2/203	0.176745	0.333535	2.68848	4.65925	RHOA;GTF2E2
Glutathione metabolism	1/57	0.193017	0.352859	4.79464	7.88709	GPX1
Legionellosis	1/57	0.193017	0.352859	4.79464	7.88709	RAB1A
Regulation of actin cytoskeleton	2/218	0.197012	0.354622	2.49987	4.06101	GNA12;RHOA
Long-term depression	1/60	0.202087	0.35814	4.55016	7.27596	GNA12
Glycerolipid metabolism	1/61	0.205089	0.35814	4.4741	7.08838	LPL
Thermogenesis	2/232	0.21618	0.366547	2.34604	3.5933	ACSL4;ATP5MF
Ras signaling pathway	2/232	0.21618	0.366547	2.34604	3.5933	PLAAT3;RHOA
Glycolysis / Gluconeogenesis	1/67	0.222863	0.366547	4.06613	6.10407	PGM1
Mitophagy	1/68	0.225787	0.366547	4.00524	5.96045	PRKN
Adipocytokine signaling pathway	1/69	0.2287	0.366547	3.94614	5.82192	ACSL4
Renal cell carcinoma	1/69	0.2287	0.366547	3.94614	5.82192	EGLN1
Adherens junction	1/71	0.234494	0.370755	3.83301	5.55911	RHOA
Endocytosis	2/252	0.243836	0.372652	2.15616	3.0429	NEDD4L;RHOA
Thyroid hormone synthesis	1/75	0.245954	0.372652	3.62509	5.0846	GPX1
Metabolism of xenobiotics by cytochrome P450	1/76	0.248792	0.372652	3.57658	4.97551	CBR1
Pertussis	1/76	0.248792	0.372652	3.57658	4.97551	RHOA
Bacterial invasion of epithelial cells	1/77	0.25162	0.372652	3.52934	4.86991	RHOA
Prion disease	2/273	0.273038	0.394663	1.98696	2.57936	PSMD12;PSMB5
Taste transduction	1/86	0.276602	0.394663	3.15421	4.05372	HTR3A
Colorectal cancer	1/86	0.276602	0.394663	3.15421	4.05372	RHOA
GABAergic synapse	1/89	0.284745	0.401387	3.04622	3.82655	GABRB2
Morphine addiction	1/91	0.290123	0.4041	2.97823	3.68541	GABRB2
Pancreatic secretion	1/102	0.318999	0.431219	2.65239	3.03054	RHOA
T cell receptor signaling pathway	1/104	0.324123	0.431219	2.60063	2.92996	RHOA
C-type lectin receptor signaling pathway	1/104	0.324123	0.431219	2.60063	2.92996	RHOA
MicroRNAs in cancer	2/310	0.324336	0.431219	1.74497	1.9648	MMP16;RHOA
HIF-1 signaling pathway	1/109	0.336767	0.442717	2.4796	2.69871	EGLN1
Leukocyte transendothelial migration	1/114	0.349178	0.453932	2.36929	2.4929	RHOA
Neurotrophin signaling pathway	1/119	0.36136	0.464606	2.26832	2.30888	RHOA
Neuroactive ligand-receptor interaction	2/341	0.366655	0.46629	1.5829	1.58817	GABRB2;PTGER3
Platelet activation	1/124	0.373317	0.469657	2.17557	2.14364	RHOA
Purine metabolism	1/129	0.385053	0.479268	2.09005	1.9947	PGM1
Autophagy	1/137	0.403381	0.49162	1.96632	1.78517	RAB1A
Yersinia infection	1/137	0.403381	0.49162	1.96632	1.78517	RHOA
Fluid shear stress and atherosclerosis	1/139	0.407878	0.491976	1.93762	1.73764	RHOA
Signaling pathways regulating pluripotency of stem cells	1/143	0.416772	0.497575	1.88266	1.64774	ACVR1C
Retrograde endocannabinoid signaling	1/148	0.427704	0.505469	1.81817	1.54421	GABRB2
mTOR signaling pathway	1/154	0.440557	0.510348	1.74633	1.4315	RHOA
Oxytocin signaling pathway	1/154	0.440557	0.510348	1.74633	1.4315	RHOA
Wnt signaling pathway	1/166	0.465413	0.533856	1.61835	1.23776	RHOA
Tuberculosis	1/180	0.493037	0.553652	1.49071	1.05419	RHOA
NOD-like receptor signaling pathway	1/181	0.494956	0.553652	1.48236	1.04252	RHOA
Axon guidance	1/182	0.496867	0.553652	1.47409	1.03103	RHOA
Chemokine signaling pathway	1/192	0.515591	0.569095	1.39621	0.924907	RHOA
Focal adhesion	1/201	0.531853	0.578096	1.33277	0.841494	RHOA
Epstein-Barr virus infection	1/202	0.533627	0.578096	1.32607	0.832851	PSMD12
Proteoglycans in cancer	1/205	0.538907	0.57846	1.30637	0.807615	RHOA
Rap1 signaling pathway	1/210	0.547577	0.582423	1.2748	0.767749	RHOA
Lipid and atherosclerosis	1/215	0.556086	0.586145	1.2447	0.730427	RHOA
Chemical carcinogenesis	1/239	0.594781	0.617428	1.11782	0.580775	CBR1
Calcium signaling pathway	1/240	0.596319	0.617428	1.11308	0.575441	PTGER3
Shigellosis	1/246	0.605427	0.620511	1.08549	0.544724	RHOA
Salmonella infection	1/249	0.609904	0.620511	1.0722	0.530153	RHOA
MAPK signaling pathway	1/294	0.671348	0.672599	0.905452	0.360793	GNA12
Cytokine-cytokine receptor interaction	1/295	0.672599	0.672599	0.902326	0.357868	ACVR1C

## Sheet: GO Biolocical Processes
Term	Overlap	P-value	Adjusted p-value	Odds Ratio	Combined Score	Genes
Proteasome-Mediated Ubiquitin-Dependent Protein Catabolic Process (GO:0043161)	7/319	0.000192864	0.148119	6.47111	55.3508	PRKN;PSMD12;PSMB5;UBXN8;NEDD4L;UBE2J2;RFFL
Regulation Of Proteasomal Protein Catabolic Process (GO:0061136)	3/53	0.00103697	0.182995	16.5625	113.808	PRKN;GPX1;GNA12
Proteasomal Protein Catabolic Process (GO:0010498)	5/220	0.00142182	0.182995	6.54817	42.9286	PRKN;PSMD12;PSMB5;NEDD4L;RFFL
Negative Regulation Of Release Of Cytochrome C From Mitochondria (GO:0090201)	2/16	0.00160931	0.182995	38.9648	250.62	PRKN;GPX1
Ventricular Cardiac Muscle Cell Action Potential (GO:0086005)	2/17	0.00181946	0.182995	36.3653	229.437	NEDD4L;SCN3B
Negative Regulation Of Signal Transduction By P53 Class Mediator (GO:1901797)	2/18	0.00204193	0.182995	34.0908	211.153	PRKN;RFFL
Protein K48-linked Ubiquitination (GO:0070936)	3/70	0.00231515	0.182995	12.3495	74.9403	PRKN;NEDD4L;RFFL
Regulation Of Fibroblast Migration (GO:0010762)	2/20	0.00252346	0.182995	30.2998	181.257	GNA12;RFFL
Regulation Of Membrane Depolarization (GO:0003254)	2/20	0.00252346	0.182995	30.2998	181.257	NEDD4L;SCN3B
Negative Regulation Of Phosphorylation (GO:0042326)	3/75	0.00281791	0.182995	11.489	67.4607	PRKN;CHP1;C9ORF72
Placenta Development (GO:0001890)	2/22	0.00305316	0.182995	27.2671	157.92	PLAC1;ANG
Negative Regulation Of Protein Modification Process (GO:0031400)	3/78	0.00314937	0.182995	11.0278	63.5261	PRKN;CHP1;C9ORF72
Regulation Of TOR Signaling (GO:0032006)	3/78	0.00314937	0.182995	11.0278	63.5261	GNA12;RFFL;C9ORF72
Negative Regulation Of Extrinsic Apoptotic Signaling Pathway Via Death Domain Receptors (GO:1902042)	2/23	0.00333585	0.182995	25.9674	148.093	GPX1;RFFL
Regulation Of Supramolecular Fiber Organization (GO:1902903)	2/24	0.0036303	0.185871	24.7858	139.258	GPX1;C9ORF72
fatty-acyl-CoA Biosynthetic Process (GO:0046949)	2/25	0.00393644	0.188949	23.707	131.277	ACSL4;ACAT1
ERAD Pathway (GO:0036503)	3/89	0.00456511	0.1948	9.61192	51.8016	PRKN;UBXN8;UBE2J2
Regulation Of Sodium Ion Transmembrane Transport (GO:1902305)	2/28	0.00492403	0.1948	20.9684	111.418	NEDD4L;SCN3B
Cardiac Muscle Cell Action Potential Involved In Contraction (GO:0086002)	2/30	0.00563919	0.1948	19.4687	100.809	NEDD4L;SCN3B
Regulation Of Extrinsic Apoptotic Signaling Pathway Via Death Domain Receptors (GO:1902041)	2/31	0.00601354	0.1948	18.7964	96.12	GPX1;RFFL
Response To Estradiol (GO:0032355)	2/31	0.00601354	0.1948	18.7964	96.12	STRN3;CCDC62
Inner Mitochondrial Membrane Organization (GO:0007007)	2/34	0.00720265	0.1948	17.0317	84.0225	TOMM70;CHCHD3
Positive Regulation Of Autophagy (GO:0010508)	3/107	0.00760493	0.1948	7.94111	38.7443	PRKN;ORMDL3;C9ORF72
Regulation Of Sodium Ion Transport (GO:0002028)	2/35	0.00762074	0.1948	16.5147	80.5404	NEDD4L;SCN3B
Regulation Of Sodium Ion Transmembrane Transporter Activity (GO:2000649)	2/37	0.00848902	0.1948	15.5695	74.2505	NEDD4L;SCN3B
Negative Regulation Of Mitochondrion Organization (GO:0010823)	2/39	0.00939952	0.1948	14.7264	68.7295	PRKN;GPX1
Regulation Of Protein Targeting To Mitochondrion (GO:1903214)	2/39	0.00939952	0.1948	14.7264	68.7295	PRKN;UBE2J2
Protein Polyubiquitination (GO:0000209)	4/226	0.0103248	0.1948	5.00013	22.8666	PRKN;NEDD4L;UBE2J2;RFFL
Heart Contraction (GO:0060047)	2/41	0.0103516	0.1948	13.9698	63.8506	GPX1;SCN3B
Regulation Of Release Of Cytochrome C From Mitochondria (GO:0090199)	2/41	0.0103516	0.1948	13.9698	63.8506	PRKN;GPX1
Fatty Acid Metabolic Process (GO:0006631)	3/122	0.0108697	0.1948	6.93487	31.3579	GPX1;ACOX1;ACSL4
Ubiquitin-Dependent Protein Catabolic Process (GO:0006511)	5/367	0.0122538	0.1948	3.8601	16.9919	PRKN;PSMD12;PSMB5;NEDD4L;RFFL
Negative Regulation Of Hydrolase Activity (GO:0051346)	2/47	0.0134506	0.1948	12.1035	52.1507	EGLN1;CHP1
Regulation Of Tumor Necrosis Factor-Mediated Signaling Pathway (GO:0010803)	2/48	0.0140017	0.1948	11.8398	50.5391	PRKN;RFFL
Cytoplasmic Microtubule Organization (GO:0031122)	2/48	0.0140017	0.1948	11.8398	50.5391	CHP1;RHOA
Fatty Acid Beta-Oxidation (GO:0006635)	2/49	0.0145624	0.1948	11.5873	49.0063	ACOX1;ACAT1
Negative Regulation Of Cysteine-Type Endopeptidase Activity Involved In Apoptotic Process (GO:0043154)	2/49	0.0145624	0.1948	11.5873	49.0063	GPX1;RFFL
Fatty Acid Oxidation (GO:0019395)	2/52	0.0163018	0.1948	10.8904	44.8301	ACOX1;ACAT1
Rho Protein Signal Transduction (GO:0007266)	2/52	0.0163018	0.1948	10.8904	44.8301	GNA12;RHOA
Icosanoid Metabolic Process (GO:0006690)	2/52	0.0163018	0.1948	10.8904	44.8301	GPX1;CYP4F3
Arachidonic Acid Metabolic Process (GO:0019369)	2/52	0.0163018	0.1948	10.8904	44.8301	CBR1;GPX1
Mitochondrial Transport (GO:0006839)	2/53	0.0169005	0.1948	10.6763	43.5639	TOMM70;PRKN
Negative Regulation Of Protein Phosphorylation (GO:0001933)	3/149	0.0185174	0.1948	5.64469	22.5169	PRKN;CHP1;C9ORF72
Inclusion Body Assembly (GO:0070841)	1/5	0.0186116	0.1948	67.3007	268.124	PRKN
Intracellular Oxygen Homeostasis (GO:0032364)	1/5	0.0186116	0.1948	67.3007	268.124	EGLN1
Isoleucine Metabolic Process (GO:0006549)	1/5	0.0186116	0.1948	67.3007	268.124	ACAT1
Regulation Of Protein Targeting (GO:1903533)	1/5	0.0186116	0.1948	67.3007	268.124	PRKN
Regulation Of Retrograde Transport, Endosome To Golgi (GO:1905279)	1/5	0.0186116	0.1948	67.3007	268.124	PRKN
Regulation Of Ventricular Cardiac Muscle Cell Membrane Depolarization (GO:0060373)	1/5	0.0186116	0.1948	67.3007	268.124	SCN3B
Centromeric Sister Chromatid Cohesion (GO:0070601)	1/5	0.0186116	0.1948	67.3007	268.124	NAA50
Cilium Disassembly (GO:0061523)	1/5	0.0186116	0.1948	67.3007	268.124	KIF19
Positive Regulation Of Autophagy Of Mitochondrion In Response To Mitochondrial Depolarization (GO:1904925)	1/5	0.0186116	0.1948	67.3007	268.124	PRKN
Response To Manganese Ion (GO:0010042)	1/5	0.0186116	0.1948	67.3007	268.124	PRKN
Negative Regulation Of Cell Size (GO:0045792)	1/5	0.0186116	0.1948	67.3007	268.124	RHOA
Positive Regulation Of Fever Generation (GO:0031622)	1/5	0.0186116	0.1948	67.3007	268.124	PTGER3
Regulation Of Reactive Oxygen Species Metabolic Process (GO:2000377)	2/56	0.0187517	0.1948	10.0817	40.0895	PRKN;CBR1
DNA-templated Transcription Initiation (GO:0006352)	2/59	0.0206844	0.1948	9.54963	37.037	GTF2E2;MED7
Fatty Acid Catabolic Process (GO:0009062)	2/61	0.0220172	0.1948	9.22498	35.2019	ACOX1;ACAT1
Inorganic Cation Transmembrane Transport (GO:0098662)	4/284	0.022032	0.1948	3.95272	15.0806	ABCC9;HTR3A;SCN3B;ATP5MF
Negative Regulation Of Digestive System Process (GO:0060457)	1/6	0.0222927	0.1948	53.8378	204.772	PTGER3
Positive Regulation Of Mitophagy In Response To Mitochondrial Depolarization (GO:0098779)	1/6	0.0222927	0.1948	53.8378	204.772	PRKN
SA Node Cell Action Potential (GO:0086015)	1/6	0.0222927	0.1948	53.8378	204.772	SCN3B
Very Long-Chain Fatty Acid Catabolic Process (GO:0042760)	1/6	0.0222927	0.1948	53.8378	204.772	ACOX1
Positive Regulation Of Phospholipid Biosynthetic Process (GO:0071073)	1/6	0.0222927	0.1948	53.8378	204.772	CHP1
Ketone Body Metabolic Process (GO:1902224)	1/6	0.0222927	0.1948	53.8378	204.772	ACAT1
Positive Regulation Of Triglyceride Catabolic Process (GO:0010898)	1/6	0.0222927	0.1948	53.8378	204.772	ABHD5
Regulation Of Oxidative Stress-Induced Neuron Intrinsic Apoptotic Signaling Pathway (GO:1903376)	1/6	0.0222927	0.1948	53.8378	204.772	PRKN
Cellular Response To Histamine (GO:0071420)	1/6	0.0222927	0.1948	53.8378	204.772	GABRB2
Cleavage Furrow Formation (GO:0036089)	1/6	0.0222927	0.1948	53.8378	204.772	RHOA
Regulation Of Atrial Cardiac Muscle Cell Membrane Depolarization (GO:0060371)	1/6	0.0222927	0.1948	53.8378	204.772	SCN3B
Mitochondrion Organization (GO:0007005)	3/162	0.0230335	0.1948	5.17977	19.5319	TOMM70;PRKN;CHCHD3
Protein Polymerization (GO:0051258)	2/63	0.0233846	0.1948	8.92163	33.5067	PRKN;ANG
Regulation Of Cellular Catabolic Process (GO:0031329)	2/63	0.0233846	0.1948	8.92163	33.5067	PRKN;C9ORF72
Regulation Of Cyclic-Nucleotide Phosphodiesterase Activity (GO:0051342)	1/7	0.0259602	0.1948	44.8626	163.802	EGLN1
Regulation Of Dopamine Metabolic Process (GO:0042053)	1/7	0.0259602	0.1948	44.8626	163.802	PRKN
Regulation Of Establishment Of Protein Localization To Mitochondrion (GO:1903747)	1/7	0.0259602	0.1948	44.8626	163.802	PRKN
Negative Regulation Of Macrophage Migration (GO:1905522)	1/7	0.0259602	0.1948	44.8626	163.802	DDT
Negative Regulation Of Mitochondrial Fusion (GO:0010637)	1/7	0.0259602	0.1948	44.8626	163.802	PRKN
UV Protection (GO:0009650)	1/7	0.0259602	0.1948	44.8626	163.802	GPX1
Regulation Of Lipase Activity (GO:0060191)	1/7	0.0259602	0.1948	44.8626	163.802	RHOA
Regulation Of Mammary Gland Epithelial Cell Proliferation (GO:0033599)	1/7	0.0259602	0.1948	44.8626	163.802	GPX1
Aspartate Family Amino Acid Biosynthetic Process (GO:0009067)	1/7	0.0259602	0.1948	44.8626	163.802	PLOD2
Atrial Cardiac Muscle Cell To AV Node Cell Signaling (GO:0086026)	1/7	0.0259602	0.1948	44.8626	163.802	SCN3B
Regulation Of Oxidative Stress-Induced Cell Death (GO:1903201)	1/7	0.0259602	0.1948	44.8626	163.802	PRKN
Lipoxygenase Pathway (GO:0019372)	1/7	0.0259602	0.1948	44.8626	163.802	GPX1
Protein K27-linked Ubiquitination (GO:0044314)	1/7	0.0259602	0.1948	44.8626	163.802	PRKN
Regulation Of Protein Glycosylation (GO:0060049)	1/7	0.0259602	0.1948	44.8626	163.802	CHP1
Peptidyl-Lysine Hydroxylation (GO:0017185)	1/7	0.0259602	0.1948	44.8626	163.802	PLOD2
Cellular Modified Amino Acid Biosynthetic Process (GO:0042398)	1/7	0.0259602	0.1948	44.8626	163.802	PLOD2
Negative Regulation Of B Cell Apoptotic Process (GO:0002903)	1/7	0.0259602	0.1948	44.8626	163.802	ORMDL3
Negative Regulation Of SMAD Protein Signal Transduction (GO:0060392)	1/7	0.0259602	0.1948	44.8626	163.802	PBLD
Regulation Of Monoatomic Ion Transmembrane Transporter Activity (GO:0032412)	2/69	0.0276897	0.1948	8.12022	29.1248	NEDD4L;SCN3B
Negative Regulation Of Extrinsic Apoptotic Signaling Pathway (GO:2001237)	2/70	0.028436	0.1948	8.0004	28.4822	GPX1;RFFL
Positive Regulation Of Protein Transport (GO:0051222)	2/70	0.028436	0.1948	8.0004	28.4822	CHP1;ANG
Positive Regulation Of Hydrolase Activity (GO:0051345)	3/176	0.0285085	0.1948	4.75723	16.9241	C9ORF72;RHOA;ZC3H15
N-acylphosphatidylethanolamine Metabolic Process (GO:0070292)	1/8	0.0296141	0.1948	38.4517	135.331	PLAAT3
Negative Regulation Of Oxidative Stress-Induced Neuron Death (GO:1903204)	1/8	0.0296141	0.1948	38.4517	135.331	PRKN
Negative Regulation Of Protein Import Into Nucleus (GO:0042308)	1/8	0.0296141	0.1948	38.4517	135.331	CHP1
Regulation Of Intrinsic Apoptotic Signaling Pathway By P53 Class Mediator (GO:1902253)	1/8	0.0296141	0.1948	38.4517	135.331	PRKN
Vitamin K Metabolic Process (GO:0042373)	1/8	0.0296141	0.1948	38.4517	135.331	CBR1
Positive Regulation Of Tumor Necrosis Factor-Mediated Signaling Pathway (GO:1903265)	1/8	0.0296141	0.1948	38.4517	135.331	PRKN
Protein K29-linked Ubiquitination (GO:0035519)	1/8	0.0296141	0.1948	38.4517	135.331	PRKN
Negative Regulation By Host Of Viral Genome Replication (GO:0044828)	1/8	0.0296141	0.1948	38.4517	135.331	PRKN
Cyclooxygenase Pathway (GO:0019371)	1/8	0.0296141	0.1948	38.4517	135.331	CBR1
Ubiquitin-Dependent ERAD Pathway (GO:0030433)	2/73	0.0307229	0.1948	7.6612	26.682	UBXN8;UBE2J2
Transcription Initiation At RNA Polymerase II Promoter (GO:0006367)	2/76	0.0330804	0.1948	7.3495	25.0531	GTF2E2;MED7
Positive Regulation Of Protein Secretion (GO:0050714)	2/76	0.0330804	0.1948	7.3495	25.0531	ACSL4;ANG
Regulation Of Cellular Response To Oxidative Stress (GO:1900407)	1/9	0.0332545	0.1948	33.6436	114.508	PRKN
Regulation Of Ceramide Biosynthetic Process (GO:2000303)	1/9	0.0332545	0.1948	33.6436	114.508	ORMDL3
Positive Regulation Of Lipase Activity (GO:0060193)	1/9	0.0332545	0.1948	33.6436	114.508	RHOA
Negative Regulation Of Lymphocyte Apoptotic Process (GO:0070229)	1/9	0.0332545	0.1948	33.6436	114.508	ORMDL3
Negative Regulation Of Potassium Ion Transmembrane Transporter Activity (GO:1901017)	1/9	0.0332545	0.1948	33.6436	114.508	NEDD4L
Negative Regulation Of Protein Autophosphorylation (GO:0031953)	1/9	0.0332545	0.1948	33.6436	114.508	CHP1
Negative Regulation Of Protein Localization To Cell Surface (GO:2000009)	1/9	0.0332545	0.1948	33.6436	114.508	NEDD4L
Negative Regulation Of Sodium Ion Transmembrane Transport (GO:1902306)	1/9	0.0332545	0.1948	33.6436	114.508	NEDD4L
Protein K6-linked Ubiquitination (GO:0085020)	1/9	0.0332545	0.1948	33.6436	114.508	PRKN
Phosphatidylethanolamine Acyl-Chain Remodeling (GO:0036152)	1/9	0.0332545	0.1948	33.6436	114.508	PLAAT3
Phosphatidylglycerol Biosynthetic Process (GO:0006655)	1/9	0.0332545	0.1948	33.6436	114.508	CRLS1
Mitochondrial Ribosome Assembly (GO:0061668)	1/9	0.0332545	0.1948	33.6436	114.508	MTERF4
Quinone Metabolic Process (GO:1901661)	1/9	0.0332545	0.1948	33.6436	114.508	CBR1
Response To Histamine (GO:0034776)	1/9	0.0332545	0.1948	33.6436	114.508	GABRB2
Endothelial Tube Morphogenesis (GO:0061154)	1/9	0.0332545	0.1948	33.6436	114.508	RHOA
Negative Regulation Of Transforming Growth Factor Beta Receptor Signaling Pathway (GO:0030512)	2/77	0.0338816	0.1948	7.25114	24.5443	PEG10;PBLD
Endocytosis (GO:0006897)	3/189	0.0341577	0.1948	4.42182	14.9315	RAB1A;C9ORF72;ATP9B
Long-Chain Fatty Acid Metabolic Process (GO:0001676)	2/78	0.0346903	0.1948	7.15537	24.0513	GPX1;ACSL4
Positive Regulation Of Protein Localization To Membrane (GO:1905477)	2/79	0.0355065	0.1948	7.06209	23.5735	PRKN;CHP1
Regulation Of Neuron Differentiation (GO:0045664)	2/79	0.0355065	0.1948	7.06209	23.5735	CASZ1;RHOA
Modification-Dependent Protein Catabolic Process (GO:0019941)	3/192	0.0355381	0.1948	4.35097	14.5198	PRKN;NEDD4L;RFFL
Negative Regulation Of Dephosphorylation (GO:0035305)	1/10	0.0368814	0.1948	29.9039	98.6843	CHP1
Negative Regulation Of Exocytosis (GO:0045920)	1/10	0.0368814	0.1948	29.9039	98.6843	PRKN
Establishment Of Endothelial Intestinal Barrier (GO:0090557)	1/10	0.0368814	0.1948	29.9039	98.6843	RAB1A
Establishment Of Epithelial Cell Apical/Basal Polarity (GO:0045198)	1/10	0.0368814	0.1948	29.9039	98.6843	RHOA
Negative Regulation Of Intracellular Estrogen Receptor Signaling Pathway (GO:0033147)	1/10	0.0368814	0.1948	29.9039	98.6843	STRN3
Negative Regulation Of Oxidoreductase Activity (GO:0051354)	1/10	0.0368814	0.1948	29.9039	98.6843	PRKN
Regulation Of Lipid Transport (GO:0032368)	1/10	0.0368814	0.1948	29.9039	98.6843	PRKN
Negative Regulation Of Sodium Ion Transmembrane Transporter Activity (GO:2000650)	1/10	0.0368814	0.1948	29.9039	98.6843	NEDD4L
Lens Fiber Cell Differentiation (GO:0070306)	1/10	0.0368814	0.1948	29.9039	98.6843	PLAAT3
Regulation Of Programmed Necrotic Cell Death (GO:0062098)	1/10	0.0368814	0.1948	29.9039	98.6843	PRKN
Peptidyl-Proline Hydroxylation (GO:0019511)	1/10	0.0368814	0.1948	29.9039	98.6843	EGLN1
Regulation Of Triglyceride Catabolic Process (GO:0010896)	1/10	0.0368814	0.1948	29.9039	98.6843	ABHD5
Regulation Of B Cell Apoptotic Process (GO:0002902)	1/10	0.0368814	0.1948	29.9039	98.6843	ORMDL3
Positive Regulation Of Autophagy Of Mitochondrion (GO:1903599)	1/10	0.0368814	0.1948	29.9039	98.6843	PRKN
Negative Regulation Of Apoptotic Signaling Pathway (GO:2001234)	2/82	0.0379996	0.1948	6.79623	22.2249	PRKN;GPX1
Fatty Acid Beta-Oxidation Using acyl-CoA Oxidase (GO:0033540)	1/11	0.0404949	0.1948	26.9122	86.296	ACOX1
Negative Regulation Of Leukocyte Chemotaxis (GO:0002689)	1/11	0.0404949	0.1948	26.9122	86.296	DDT
Negative Regulation Of Potassium Ion Transmembrane Transport (GO:1901380)	1/11	0.0404949	0.1948	26.9122	86.296	NEDD4L
Positive Regulation Of Protein Polyubiquitination (GO:1902916)	1/11	0.0404949	0.1948	26.9122	86.296	PRKN
Regulation Of Mitochondrial Fusion (GO:0010635)	1/11	0.0404949	0.1948	26.9122	86.296	PRKN
Regulation Of Response To Oxidative Stress (GO:1902882)	1/11	0.0404949	0.1948	26.9122	86.296	PRKN
Phasic Smooth Muscle Contraction (GO:0014821)	1/11	0.0404949	0.1948	26.9122	86.296	PTGER3
Response To Nitric Oxide (GO:0071731)	1/11	0.0404949	0.1948	26.9122	86.296	EGLN1
Regulation Of Adipose Tissue Development (GO:1904177)	1/11	0.0404949	0.1948	26.9122	86.296	PLAAT3
Negative Regulation Of calcineurin-NFAT Signaling Cascade (GO:0070885)	1/11	0.0404949	0.1948	26.9122	86.296	CHP1
Negative Regulation Of Calcineurin-Mediated Signaling (GO:0106057)	1/11	0.0404949	0.1948	26.9122	86.296	CHP1
Positive Regulation Of Cytoplasmic Transport (GO:1903651)	1/11	0.0404949	0.1948	26.9122	86.296	PRKN
Positive Regulation Of Protein Localization (GO:1903829)	2/85	0.0405579	0.1948	6.5496	20.9916	PRKN;ORMDL3
Regulation Of Insulin Secretion (GO:0050796)	2/87	0.0422987	0.1948	6.39484	20.2269	PRKN;ACSL4
Negative Regulation Of Potassium Ion Transport (GO:0043267)	1/12	0.044095	0.1948	24.4644	76.3633	NEDD4L
Regulation Of Leukocyte Adhesion To Vascular Endothelial Cell (GO:1904994)	1/12	0.044095	0.1948	24.4644	76.3633	RHOA
Adult Locomotory Behavior (GO:0008344)	1/12	0.044095	0.1948	24.4644	76.3633	PRKN
Positive Regulation Of Sodium Ion Transmembrane Transporter Activity (GO:2000651)	1/12	0.044095	0.1948	24.4644	76.3633	CHP1
Positive Regulation Of Sodium Ion Transport (GO:0010765)	1/12	0.044095	0.1948	24.4644	76.3633	SCN3B
Atrial Cardiac Muscle Cell Action Potential (GO:0086014)	1/12	0.044095	0.1948	24.4644	76.3633	SCN3B
Oligosaccharide-Lipid Intermediate Biosynthetic Process (GO:0006490)	1/12	0.044095	0.1948	24.4644	76.3633	DPM1
Protein Insertion Into Mitochondrial Inner Membrane (GO:0045039)	1/12	0.044095	0.1948	24.4644	76.3633	TOMM70
Cellular Response To Acidic pH (GO:0071468)	1/12	0.044095	0.1948	24.4644	76.3633	CHP1
Mitochondrial Transcription (GO:0006390)	1/12	0.044095	0.1948	24.4644	76.3633	MTERF4
Negative Regulation By Host Of Viral Process (GO:0044793)	1/12	0.044095	0.1948	24.4644	76.3633	PRKN
Cristae Formation (GO:0042407)	1/12	0.044095	0.1948	24.4644	76.3633	CHCHD3
Regulation Of Actin Filament Organization (GO:0110053)	1/12	0.044095	0.1948	24.4644	76.3633	C9ORF72
Regulation Of Actin Cytoskeleton Organization (GO:0032956)	2/91	0.0458629	0.1948	6.1062	18.8199	C9ORF72;RHOA
Positive Regulation Of Glycoprotein Biosynthetic Process (GO:0010560)	1/13	0.0476818	0.1948	22.4245	68.2425	CHP1
Ether Lipid Metabolic Process (GO:0046485)	1/13	0.0476818	0.1948	22.4245	68.2425	PLAAT3
N-terminal Protein Amino Acid Modification (GO:0031365)	1/13	0.0476818	0.1948	22.4245	68.2425	NAA50
acyl-CoA Biosynthetic Process (GO:0071616)	1/13	0.0476818	0.1948	22.4245	68.2425	ACAT1
Negative Regulation Of Secretion (GO:0051048)	1/13	0.0476818	0.1948	22.4245	68.2425	PTGER3
Inhibitory Synapse Assembly (GO:1904862)	1/13	0.0476818	0.1948	22.4245	68.2425	GABRB2
Outer Mitochondrial Membrane Organization (GO:0007008)	1/13	0.0476818	0.1948	22.4245	68.2425	TOMM70
Protein Hydroxylation (GO:0018126)	1/13	0.0476818	0.1948	22.4245	68.2425	PLOD2
Catecholamine Metabolic Process (GO:0006584)	1/13	0.0476818	0.1948	22.4245	68.2425	PRKN
Protein Insertion Into Mitochondrial Outer Membrane (GO:0045040)	1/13	0.0476818	0.1948	22.4245	68.2425	TOMM70
Membrane Depolarization (GO:0051899)	1/13	0.0476818	0.1948	22.4245	68.2425	SCN3B
Membrane Depolarization During Action Potential (GO:0086010)	1/13	0.0476818	0.1948	22.4245	68.2425	SCN3B
Mitochondrial Fission (GO:0000266)	1/13	0.0476818	0.1948	22.4245	68.2425	PRKN
Regulation Of Trophoblast Cell Migration (GO:1901163)	1/13	0.0476818	0.1948	22.4245	68.2425	ACVR1C
Response To Chemokine (GO:1990868)	1/13	0.0476818	0.1948	22.4245	68.2425	RHOA
Negative Regulation Of Cell Migration Involved In Sprouting Angiogenesis (GO:0090051)	1/13	0.0476818	0.1948	22.4245	68.2425	RHOA
Protein O-linked Glycosylation (GO:0006493)	2/93	0.0476853	0.1948	5.9714	18.1718	DPM1;PLOD2
Establishment Of Apical/Basal Cell Polarity (GO:0035089)	1/14	0.0512553	0.198809	20.6985	61.494	RHOA
Stress Fiber Assembly (GO:0043149)	1/14	0.0512553	0.198809	20.6985	61.494	RHOA
COPII-coated Vesicle Cargo Loading (GO:0090110)	1/14	0.0512553	0.198809	20.6985	61.494	RAB1A
Synaptic Transmission, GABAergic (GO:0051932)	1/14	0.0512553	0.198809	20.6985	61.494	GABRB2
Negative Regulation Of Nucleocytoplasmic Transport (GO:0046823)	1/14	0.0512553	0.198809	20.6985	61.494	CHP1
Polarized Epithelial Cell Differentiation (GO:0030859)	1/14	0.0512553	0.198809	20.6985	61.494	RHOA
Mitotic Recombination (GO:0006312)	1/14	0.0512553	0.198809	20.6985	61.494	RAD54B
Positive Regulation Of Acute Inflammatory Response (GO:0002675)	1/14	0.0512553	0.198809	20.6985	61.494	PTGER3
Contractile Actin Filament Bundle Assembly (GO:0030038)	1/14	0.0512553	0.198809	20.6985	61.494	RHOA
Dolichol Metabolic Process (GO:0019348)	1/14	0.0512553	0.198809	20.6985	61.494	DPM1
Cilium Organization (GO:0044782)	3/228	0.0542946	0.200963	3.64815	10.6283	RAB1A;CFAP221;CFAP70
Epiboly Involved In Wound Healing (GO:0090505)	1/15	0.0548156	0.200963	19.2191	55.8081	RHOA
Negative Regulation Of Endoplasmic Reticulum Stress-Induced Intrinsic Apoptotic Signaling Pathway (GO:1902236)	1/15	0.0548156	0.200963	19.2191	55.8081	PRKN
N-terminal Protein Amino Acid Acetylation (GO:0006474)	1/15	0.0548156	0.200963	19.2191	55.8081	NAA50
Dolichol-Linked Oligosaccharide Biosynthetic Process (GO:0006488)	1/15	0.0548156	0.200963	19.2191	55.8081	DPM1
Negative Regulation Of Cation Transmembrane Transport (GO:1904063)	1/15	0.0548156	0.200963	19.2191	55.8081	NEDD4L
Regulation Of Carbohydrate Metabolic Process (GO:0006109)	1/15	0.0548156	0.200963	19.2191	55.8081	PRKN
Negative Regulation Of Intrinsic Apoptotic Signaling Pathway By P53 Class Mediator (GO:1902254)	1/16	0.0583627	0.200963	17.9369	50.9602	PRKN
Positive Regulation Of Lymphocyte Migration (GO:2000403)	1/16	0.0583627	0.200963	17.9369	50.9602	RHOA
Negative Regulation Of Phosphatase Activity (GO:0010923)	1/16	0.0583627	0.200963	17.9369	50.9602	CHP1
Heart Process (GO:0003015)	1/16	0.0583627	0.200963	17.9369	50.9602	GPX1
acetyl-CoA Metabolic Process (GO:0006084)	1/16	0.0583627	0.200963	17.9369	50.9602	ACAT1
Activin Receptor Signaling Pathway (GO:0032924)	1/16	0.0583627	0.200963	17.9369	50.9602	ACVR1C
Apoptotic Nuclear Changes (GO:0030262)	1/16	0.0583627	0.200963	17.9369	50.9602	ACVR1C
Late Endosome To Lysosome Transport (GO:1902774)	1/16	0.0583627	0.200963	17.9369	50.9602	C9ORF72
Regulation Of Osteoblast Proliferation (GO:0033688)	1/16	0.0583627	0.200963	17.9369	50.9602	RHOA
Protein O-linked Mannosylation (GO:0035269)	1/16	0.0583627	0.200963	17.9369	50.9602	DPM1
Membrane Depolarization During Cardiac Muscle Cell Action Potential (GO:0086012)	1/16	0.0583627	0.200963	17.9369	50.9602	SCN3B
Mitophagy (GO:0000423)	1/16	0.0583627	0.200963	17.9369	50.9602	PRKN
Lysosomal Transport (GO:0007041)	2/105	0.0591532	0.200963	5.27251	14.9087	PRKN;C9ORF72
Positive Regulation Of Heart Rate (GO:0010460)	1/17	0.0618967	0.200963	16.815	46.7843	SCN3B
Negative Regulation Of Insulin Secretion (GO:0046676)	1/17	0.0618967	0.200963	16.815	46.7843	PRKN
Positive Regulation Of Leukocyte Adhesion To Vascular Endothelial Cell (GO:1904996)	1/17	0.0618967	0.200963	16.815	46.7843	RHOA
Negative Regulation Of Oxidative Stress-Induced Intrinsic Apoptotic Signaling Pathway (GO:1902176)	1/17	0.0618967	0.200963	16.815	46.7843	PRKN
Branched-Chain Amino Acid Catabolic Process (GO:0009083)	1/17	0.0618967	0.200963	16.815	46.7843	ACAT1
Long-Chain fatty-acyl-CoA Biosynthetic Process (GO:0035338)	1/17	0.0618967	0.200963	16.815	46.7843	ACSL4
Prostaglandin Biosynthetic Process (GO:0001516)	1/17	0.0618967	0.200963	16.815	46.7843	CBR1
Microtubule Depolymerization (GO:0007019)	1/17	0.0618967	0.200963	16.815	46.7843	KIF19
Regulation Of Vacuole Organization (GO:0044088)	1/17	0.0618967	0.200963	16.815	46.7843	C9ORF72
Cellular Response To Unfolded Protein (GO:0034620)	1/17	0.0618967	0.200963	16.815	46.7843	PRKN
Motile Cilium Assembly (GO:0044458)	1/17	0.0618967	0.200963	16.815	46.7843	CFAP221
Response To Acidic pH (GO:0010447)	1/17	0.0618967	0.200963	16.815	46.7843	CHP1
Positive Regulation Of Dendrite Extension (GO:1903861)	1/17	0.0618967	0.200963	16.815	46.7843	NEDD4L
Regulation Of Autophagy (GO:0010506)	3/241	0.06203	0.200963	3.4466	9.58203	PRKN;ORMDL3;C9ORF72
Regulation Of Proteasomal Ubiquitin-Dependent Protein Catabolic Process (GO:0032434)	2/109	0.0631679	0.200963	5.07438	14.0152	PRKN;GNA12
Cilium Assembly (GO:0060271)	3/243	0.0632637	0.200963	3.41753	9.43391	RAB1A;CFAP221;CFAP70
Negative Regulation Of Transmembrane Receptor Protein Serine/Threonine Kinase Signaling Pathway (GO:0090101)	2/111	0.0652092	0.200963	4.98077	13.5983	PEG10;PBLD
Regulation Of Transforming Growth Factor Beta Receptor Signaling Pathway (GO:0017015)	2/111	0.0652092	0.200963	4.98077	13.5983	PEG10;PBLD
Regulation Of Dendrite Extension (GO:1903859)	1/18	0.0654175	0.200963	15.8251	43.1545	NEDD4L
fatty-acyl-CoA Metabolic Process (GO:0035337)	1/18	0.0654175	0.200963	15.8251	43.1545	ACSL4
Negative Regulation Of Lipid Storage (GO:0010888)	1/18	0.0654175	0.200963	15.8251	43.1545	ABHD5
Regulation Of Exosomal Secretion (GO:1903541)	1/18	0.0654175	0.200963	15.8251	43.1545	PRKN
Negative Regulation Of Peptide Hormone Secretion (GO:0090278)	1/18	0.0654175	0.200963	15.8251	43.1545	PRKN
Positive Regulation Of Phosphoprotein Phosphatase Activity (GO:0032516)	1/18	0.0654175	0.200963	15.8251	43.1545	GNA12
Positive Regulation Of Triglyceride Metabolic Process (GO:0090208)	1/18	0.0654175	0.200963	15.8251	43.1545	ABHD5
Cardiac Muscle Cell Contraction (GO:0086003)	1/18	0.0654175	0.200963	15.8251	43.1545	SCN3B
Regulation Of Protein Neddylation (GO:2000434)	1/18	0.0654175	0.200963	15.8251	43.1545	DCUN1D4
Maintenance Of Gastrointestinal Epithelium (GO:0030277)	1/18	0.0654175	0.200963	15.8251	43.1545	PBLD
Protein Import Into Mitochondrial Matrix (GO:0030150)	1/18	0.0654175	0.200963	15.8251	43.1545	TOMM70
Mitochondrial Fusion (GO:0008053)	1/18	0.0654175	0.200963	15.8251	43.1545	CHCHD3
Mitotic Cytokinetic Process (GO:1902410)	1/18	0.0654175	0.200963	15.8251	43.1545	RHOA
Positive Regulation Of Establishment Of Protein Localization (GO:1904951)	1/18	0.0654175	0.200963	15.8251	43.1545	CHP1
Regulation Of Protein Ubiquitination (GO:0031396)	2/113	0.0672725	0.203595	4.89053	13.1996	PRKN;CHP1
Epithelial Structure Maintenance (GO:0010669)	1/19	0.0689254	0.203595	14.9452	39.9744	PBLD
Negative Regulation Of Execution Phase Of Apoptosis (GO:1900118)	1/19	0.0689254	0.203595	14.9452	39.9744	RFFL
Establishment Of Epithelial Cell Polarity (GO:0090162)	1/19	0.0689254	0.203595	14.9452	39.9744	RHOA
tRNA Metabolic Process (GO:0006399)	1/19	0.0689254	0.203595	14.9452	39.9744	ANG
Positive Regulation Of Mitochondrial Fission (GO:0090141)	1/19	0.0689254	0.203595	14.9452	39.9744	PRKN
Cellular Response To Catecholamine Stimulus (GO:0071870)	1/19	0.0689254	0.203595	14.9452	39.9744	PRKN
Mitotic Sister Chromatid Cohesion (GO:0007064)	1/19	0.0689254	0.203595	14.9452	39.9744	NAA50
Regulation Of Autophagy Of Mitochondrion (GO:1903146)	1/19	0.0689254	0.203595	14.9452	39.9744	PRKN
Dopamine Metabolic Process (GO:0042417)	1/19	0.0689254	0.203595	14.9452	39.9744	PRKN
Protein Maturation (GO:0051604)	2/117	0.0714637	0.204481	4.71948	12.4526	NAA50;MMP16
Positive Regulation Of Lipid Catabolic Process (GO:0050996)	1/20	0.0724202	0.204481	14.1579	37.1683	ABHD5
Gamma-Aminobutyric Acid Signaling Pathway (GO:0007214)	1/20	0.0724202	0.204481	14.1579	37.1683	GABRB2
Hydrogen Peroxide Catabolic Process (GO:0042744)	1/20	0.0724202	0.204481	14.1579	37.1683	GPX1
Regulation Of Macrophage Chemotaxis (GO:0010758)	1/20	0.0724202	0.204481	14.1579	37.1683	DDT
Regulation Of Necroptotic Process (GO:0060544)	1/20	0.0724202	0.204481	14.1579	37.1683	PRKN
Leukotriene Metabolic Process (GO:0006691)	1/20	0.0724202	0.204481	14.1579	37.1683	CYP4F3
Regulation Of Phosphatase Activity (GO:0010921)	1/20	0.0724202	0.204481	14.1579	37.1683	CHP1
Phosphatidylglycerol Metabolic Process (GO:0046471)	1/20	0.0724202	0.204481	14.1579	37.1683	CRLS1
Mitochondrial RNA Metabolic Process (GO:0000959)	1/20	0.0724202	0.204481	14.1579	37.1683	MTERF4
Cellular Response To pH (GO:0071467)	1/20	0.0724202	0.204481	14.1579	37.1683	CHP1
Monocarboxylic Acid Catabolic Process (GO:0072329)	1/20	0.0724202	0.204481	14.1579	37.1683	ACOX1
Regulation Of Protein Kinase Activity (GO:0045859)	2/119	0.0735906	0.207024	4.63833	12.1025	MRNIP;CHP1
Positive Regulation Of Heart Contraction (GO:0045823)	1/21	0.0759021	0.208189	13.4493	34.6765	SCN3B
Negative Regulation Of Reactive Oxygen Species Metabolic Process (GO:2000378)	1/21	0.0759021	0.208189	13.4493	34.6765	PRKN
Negative Regulation Of Tumor Necrosis Factor-Mediated Signaling Pathway (GO:0010804)	1/21	0.0759021	0.208189	13.4493	34.6765	RFFL
Lipid Catabolic Process (GO:0016042)	1/21	0.0759021	0.208189	13.4493	34.6765	PLAAT3
Protein Mannosylation (GO:0035268)	1/21	0.0759021	0.208189	13.4493	34.6765	DPM1
Modulation By Host Of Viral Genome Replication (GO:0044827)	1/21	0.0759021	0.208189	13.4493	34.6765	PRKN
Regulation Of Cell-Substrate Junction Assembly (GO:0090109)	1/21	0.0759021	0.208189	13.4493	34.6765	RHOA
Potassium Ion Transport (GO:0006813)	2/122	0.076819	0.208757	4.52169	11.604	CHP1;ABCC9
Regulation Of Protein Catabolic Process (GO:0042176)	2/122	0.076819	0.208757	4.52169	11.604	PRKN;GPX1
Regulation Of Protein Phosphorylation (GO:0001932)	3/265	0.0775734	0.208757	3.12707	7.99444	PRKN;CHP1;C9ORF72
Regulation Of Dopamine Secretion (GO:0014059)	1/22	0.0793711	0.208757	12.8082	32.4512	PRKN
Negative Regulation Of Protein Localization To Nucleus (GO:1900181)	1/22	0.0793711	0.208757	12.8082	32.4512	CHP1
Positive Regulation Of Phosphatase Activity (GO:0010922)	1/22	0.0793711	0.208757	12.8082	32.4512	GNA12
Vesicle Transport Along Microtubule (GO:0047496)	1/22	0.0793711	0.208757	12.8082	32.4512	RAB1A
Acylglycerol Biosynthetic Process (GO:0046463)	1/22	0.0793711	0.208757	12.8082	32.4512	ANG
Organelle Fission (GO:0048285)	1/22	0.0793711	0.208757	12.8082	32.4512	PRKN
Oxoacid Metabolic Process (GO:0043436)	1/22	0.0793711	0.208757	12.8082	32.4512	PPA2
Protein Neddylation (GO:0045116)	1/22	0.0793711	0.208757	12.8082	32.4512	DCUN1D4
Cellular Response To Topologically Incorrect Protein (GO:0035967)	1/22	0.0793711	0.208757	12.8082	32.4512	PRKN
Positive Regulation Of Intracellular Protein Transport (GO:0090316)	2/126	0.0811923	0.211333	4.37494	10.9852	CHP1;UBE2J2
Regulation Of Anatomical Structure Morphogenesis (GO:0022603)	2/127	0.0822976	0.211333	4.33973	10.8381	EGLN1;NEDD4L
Negative Regulation Of Oxidative Stress-Induced Cell Death (GO:1903202)	1/23	0.0828273	0.211333	12.2254	30.4535	PRKN
Positive Regulation Of Protein Targeting To Membrane (GO:0090314)	1/23	0.0828273	0.211333	12.2254	30.4535	CHP1
Axon Extension (GO:0048675)	1/23	0.0828273	0.211333	12.2254	30.4535	C9ORF72
Long-Chain fatty-acyl-CoA Metabolic Process (GO:0035336)	1/23	0.0828273	0.211333	12.2254	30.4535	ACSL4
Protein N-linked Glycosylation Via Asparagine (GO:0018279)	1/23	0.0828273	0.211333	12.2254	30.4535	DPM1
Cellular Lipid Catabolic Process (GO:0044242)	1/23	0.0828273	0.211333	12.2254	30.4535	ACOX1
Regulation Of T Cell Migration (GO:2000404)	1/23	0.0828273	0.211333	12.2254	30.4535	RHOA
Plasma Membrane Bounded Cell Projection Assembly (GO:0120031)	3/275	0.0845105	0.212625	3.01057	7.43876	RAB1A;CFAP221;CFAP70
Stress Granule Assembly (GO:0034063)	1/24	0.0862706	0.212625	11.6933	28.6517	C9ORF72
Fat-Soluble Vitamin Metabolic Process (GO:0006775)	1/24	0.0862706	0.212625	11.6933	28.6517	CBR1
Regulation Of Endoplasmic Reticulum Stress-Induced Intrinsic Apoptotic Signaling Pathway (GO:1902235)	1/24	0.0862706	0.212625	11.6933	28.6517	PRKN
Negative Regulation Of Ion Transmembrane Transporter Activity (GO:0032413)	1/24	0.0862706	0.212625	11.6933	28.6517	NEDD4L
Amyloid Fibril Formation (GO:1990000)	1/24	0.0862706	0.212625	11.6933	28.6517	PRKN
Lipid Translocation (GO:0034204)	1/24	0.0862706	0.212625	11.6933	28.6517	ATP9B
Regulation Of Proteolysis Involved In Protein Catabolic Process (GO:1903050)	1/24	0.0862706	0.212625	11.6933	28.6517	GPX1
Peroxisome Organization (GO:0007031)	1/24	0.0862706	0.212625	11.6933	28.6517	PLAAT3
Epithelial Cell Differentiation (GO:0030855)	2/132	0.0878933	0.212625	4.17176	10.1442	CBR1;PLAAT3
Monoatomic Cation Transmembrane Transport (GO:0098655)	3/281	0.0887968	0.212625	2.94469	7.1303	ABCC9;SCN3B;ATP5MF
ATP Biosynthetic Process (GO:0006754)	1/25	0.0897012	0.212625	11.2055	27.0195	ATP5MF
Regulation Of Double-Strand Break Repair Via Nonhomologous End Joining (GO:2001032)	1/25	0.0897012	0.212625	11.2055	27.0195	MRNIP
Negative Regulation Of Intracellular Protein Transport (GO:0090317)	1/25	0.0897012	0.212625	11.2055	27.0195	CHP1
Vesicle Cargo Loading (GO:0035459)	1/25	0.0897012	0.212625	11.2055	27.0195	RAB1A
Regulation Of Intracellular Estrogen Receptor Signaling Pathway (GO:0033146)	1/25	0.0897012	0.212625	11.2055	27.0195	STRN3
Wound Healing, Spreading Of Cells (GO:0044319)	1/25	0.0897012	0.212625	11.2055	27.0195	RHOA
Activation Of Protein Kinase B Activity (GO:0032148)	1/25	0.0897012	0.212625	11.2055	27.0195	ANG
Negative Regulation Of Response To Endoplasmic Reticulum Stress (GO:1903573)	1/25	0.0897012	0.212625	11.2055	27.0195	PRKN
Peptide Hormone Secretion (GO:0030072)	1/25	0.0897012	0.212625	11.2055	27.0195	RAB1A
Phosphatidylethanolamine Metabolic Process (GO:0046337)	1/25	0.0897012	0.212625	11.2055	27.0195	PLAAT3
Positive Regulation Of T Cell Migration (GO:2000406)	1/25	0.0897012	0.212625	11.2055	27.0195	RHOA
Regulation Of Cell Size (GO:0008361)	1/25	0.0897012	0.212625	11.2055	27.0195	RHOA
Wnt Signaling Pathway, Planar Cell Polarity Pathway (GO:0060071)	1/26	0.0931191	0.216714	10.7568	25.5352	RHOA
Regulation Of Potassium Ion Transmembrane Transporter Activity (GO:1901016)	1/26	0.0931191	0.216714	10.7568	25.5352	NEDD4L
Organelle Fusion (GO:0048284)	1/26	0.0931191	0.216714	10.7568	25.5352	CHCHD3
Protein Export From Nucleus (GO:0006611)	1/26	0.0931191	0.216714	10.7568	25.5352	CHP1
Plasma Membrane Invagination (GO:0099024)	1/26	0.0931191	0.216714	10.7568	25.5352	RHOA
Regulation Of Actin Filament Bundle Assembly (GO:0032231)	1/26	0.0931191	0.216714	10.7568	25.5352	PRKN
GPI Anchor Metabolic Process (GO:0006505)	1/27	0.0965243	0.219972	10.3425	24.1804	DPM1
Activation Of Phospholipase C Activity (GO:0007202)	1/27	0.0965243	0.219972	10.3425	24.1804	ANG
Regulation Of Mitochondrial Fission (GO:0090140)	1/27	0.0965243	0.219972	10.3425	24.1804	PRKN
Positive Regulation Of Ubiquitin-Protein Transferase Activity (GO:0051443)	1/27	0.0965243	0.219972	10.3425	24.1804	DCUN1D4
Regulation Of SMAD Protein Signal Transduction (GO:0060390)	1/27	0.0965243	0.219972	10.3425	24.1804	PBLD
Negative Regulation Of Notch Signaling Pathway (GO:0045746)	1/27	0.0965243	0.219972	10.3425	24.1804	CCNC
Regulation Of Catecholamine Secretion (GO:0050433)	1/27	0.0965243	0.219972	10.3425	24.1804	PRKN
Establishment Of Endothelial Barrier (GO:0061028)	1/28	0.0999169	0.220506	9.95896	22.9396	RAB1A
Regulation Of Glucose Metabolic Process (GO:0010906)	1/28	0.0999169	0.220506	9.95896	22.9396	PRKN
Regulation Of Monoatomic Ion Transport (GO:0043269)	1/28	0.0999169	0.220506	9.95896	22.9396	NEDD4L
Regulation Of Protein Localization To Membrane (GO:1905475)	1/28	0.0999169	0.220506	9.95896	22.9396	PRKN
Regulation Of Protein Targeting To Membrane (GO:0090313)	1/28	0.0999169	0.220506	9.95896	22.9396	CHP1
Regulation Of Protein Transport (GO:0051223)	1/28	0.0999169	0.220506	9.95896	22.9396	CHP1
Protein Insertion Into Mitochondrial Membrane (GO:0051204)	1/28	0.0999169	0.220506	9.95896	22.9396	TOMM70
Membrane Fusion (GO:0061025)	1/28	0.0999169	0.220506	9.95896	22.9396	CHP1
Negative Regulation Of Actin Filament Bundle Assembly (GO:0032232)	1/28	0.0999169	0.220506	9.95896	22.9396	PRKN
Positive Regulation Of Defense Response To Virus By Host (GO:0002230)	1/28	0.0999169	0.220506	9.95896	22.9396	TOMM70
Negative Regulation Of Cytoskeleton Organization (GO:0051494)	1/28	0.0999169	0.220506	9.95896	22.9396	PRKN
Ras Protein Signal Transduction (GO:0007265)	2/144	0.101764	0.220981	3.8169	8.72199	GNA12;RHOA
Positive Regulation Of Protein Kinase Activity (GO:0045860)	2/145	0.102946	0.220981	3.79002	8.61679	MRNIP;RHOA
Regulation Of Establishment Of Planar Polarity (GO:0090175)	1/29	0.103297	0.220981	9.6028	21.7998	RHOA
Glycolytic Process (GO:0006096)	1/29	0.103297	0.220981	9.6028	21.7998	PGM1
Alpha-Amino Acid Catabolic Process (GO:1901606)	1/29	0.103297	0.220981	9.6028	21.7998	ACAT1
Regulation Of Monoatomic Ion Transmembrane Transport (GO:0034765)	1/29	0.103297	0.220981	9.6028	21.7998	NEDD4L
Protein K11-linked Ubiquitination (GO:0070979)	1/29	0.103297	0.220981	9.6028	21.7998	PRKN
Protein Acetylation (GO:0006473)	1/29	0.103297	0.220981	9.6028	21.7998	NAA50
Cardiac Muscle Cell Action Potential (GO:0086001)	1/29	0.103297	0.220981	9.6028	21.7998	SCN3B
Regulation Of Protein Modification By Small Protein Conjugation Or Removal (GO:1903320)	1/29	0.103297	0.220981	9.6028	21.7998	PRKN
Phosphatidic Acid Biosynthetic Process (GO:0006654)	1/29	0.103297	0.220981	9.6028	21.7998	ABHD5
Positive Regulation Of Cellular Catabolic Process (GO:0031331)	2/146	0.104132	0.222149	3.76351	8.51341	ORMDL3;ABHD5
Protein Glycosylation (GO:0006486)	2/147	0.105322	0.223211	3.73736	8.41181	DPM1;PLOD2
GPI Anchor Biosynthetic Process (GO:0006506)	1/30	0.106664	0.223211	9.2712	20.7496	DPM1
Positive Regulation Of Phosphate Metabolic Process (GO:0045937)	1/30	0.106664	0.223211	9.2712	20.7496	ANG
Positive Regulation Of Protein Targeting To Mitochondrion (GO:1903955)	1/30	0.106664	0.223211	9.2712	20.7496	UBE2J2
Mitotic G2 DNA Damage Checkpoint Signaling (GO:0007095)	1/30	0.106664	0.223211	9.2712	20.7496	MRNIP
Regulation Of Vasculature Development (GO:1901342)	1/30	0.106664	0.223211	9.2712	20.7496	EGLN1
Regulation Of Cell Migration Involved In Sprouting Angiogenesis (GO:0090049)	1/30	0.106664	0.223211	9.2712	20.7496	RHOA
Negative Regulation Of DNA-binding Transcription Factor Activity (GO:0043433)	2/149	0.107713	0.223532	3.68614	8.21378	EGLN1;CHP1
Regulation Of Dendrite Morphogenesis (GO:0048814)	1/31	0.11002	0.223532	8.96171	19.7794	NEDD4L
Negative Regulation Of Intracellular Steroid Hormone Receptor Signaling Pathway (GO:0033144)	1/31	0.11002	0.223532	8.96171	19.7794	STRN3
Actin Filament Polymerization (GO:0030041)	1/31	0.11002	0.223532	8.96171	19.7794	ANG
Positive Regulation Of Proteolysis Involved In Protein Catabolic Process (GO:1903052)	1/31	0.11002	0.223532	8.96171	19.7794	PRKN
Leukocyte Cell-Cell Adhesion (GO:0007159)	1/31	0.11002	0.223532	8.96171	19.7794	CERCAM
Regulation Of Protein Autophosphorylation (GO:0031952)	1/31	0.11002	0.223532	8.96171	19.7794	CHP1
Regulation Of Protein Localization To Cell Surface (GO:2000008)	1/31	0.11002	0.223532	8.96171	19.7794	NEDD4L
Protein Localization To Chromatin (GO:0071168)	1/31	0.11002	0.223532	8.96171	19.7794	MRNIP
Phospholipid Translocation (GO:0045332)	1/31	0.11002	0.223532	8.96171	19.7794	ATP9B
Negative Chemotaxis (GO:0050919)	1/31	0.11002	0.223532	8.96171	19.7794	RHOA
Cellular Response To Organic Cyclic Compound (GO:0071407)	2/152	0.111326	0.22559	3.61187	7.9291	GABRB2;CCDC62
Gluconeogenesis (GO:0006094)	1/32	0.113362	0.226135	8.67219	18.8808	PGM1
Very Long-Chain Fatty Acid Metabolic Process (GO:0000038)	1/32	0.113362	0.226135	8.67219	18.8808	ACOX1
Protein Transmembrane Import Into Intracellular Organelle (GO:0044743)	1/32	0.113362	0.226135	8.67219	18.8808	TOMM70
Mitochondrial Membrane Organization (GO:0007006)	1/32	0.113362	0.226135	8.67219	18.8808	CHCHD3
Regulation Of Transmembrane Transport (GO:0034762)	1/32	0.113362	0.226135	8.67219	18.8808	NEDD4L
Regulation Of Ubiquitin-Protein Transferase Activity (GO:0051438)	1/32	0.113362	0.226135	8.67219	18.8808	DCUN1D4
Supramolecular Fiber Organization (GO:0097435)	3/316	0.115536	0.227461	2.61076	5.63445	PRKN;CHP1;RHOA
Positive Regulation Of Protein Dephosphorylation (GO:0035307)	1/33	0.116692	0.227461	8.40076	18.0466	GNA12
Regulation Of Potassium Ion Transmembrane Transport (GO:1901379)	1/33	0.116692	0.227461	8.40076	18.0466	NEDD4L
Carboxylic Acid Metabolic Process (GO:0019752)	1/33	0.116692	0.227461	8.40076	18.0466	CYP4F3
Cardiac Muscle Contraction (GO:0060048)	1/33	0.116692	0.227461	8.40076	18.0466	SCN3B
Phosphatidic Acid Metabolic Process (GO:0046473)	1/33	0.116692	0.227461	8.40076	18.0466	ABHD5
Positive Regulation Of DNA Binding (GO:0043388)	1/33	0.116692	0.227461	8.40076	18.0466	PRKN
Negative Regulation Of Blood Vessel Endothelial Cell Migration (GO:0043537)	1/33	0.116692	0.227461	8.40076	18.0466	RHOA
Positive Regulation Of Establishment Of Protein Localization To Mitochondrion (GO:1903749)	1/33	0.116692	0.227461	8.40076	18.0466	UBE2J2
Negative Regulation Of JNK Cascade (GO:0046329)	1/34	0.12001	0.232747	8.14578	17.2705	PRKN
Regulation Of calcineurin-NFAT Signaling Cascade (GO:0070884)	1/34	0.12001	0.232747	8.14578	17.2705	CHP1
Organelle Assembly (GO:0070925)	3/322	0.120398	0.232911	2.56087	5.42123	RAB1A;CFAP221;CFAP70
Hexose Biosynthetic Process (GO:0019319)	1/35	0.123316	0.236766	7.9058	16.5469	PGM1
Action Potential (GO:0001508)	1/35	0.123316	0.236766	7.9058	16.5469	SCN3B
Regulation Of mRNA Processing (GO:0050684)	1/35	0.123316	0.236766	7.9058	16.5469	QKI
Adenylate Cyclase-Modulating G Protein-Coupled Receptor Signaling Pathway (GO:0007188)	2/163	0.124839	0.238909	3.36323	6.99796	PTGER3;GNA12
COPII-coated Vesicle Budding (GO:0090114)	1/36	0.126609	0.238909	7.67954	15.8709	RAB1A
Substrate Adhesion-Dependent Cell Spreading (GO:0034446)	1/36	0.126609	0.238909	7.67954	15.8709	RHOA
Positive Regulation Of Interferon-Beta Production (GO:0032728)	1/36	0.126609	0.238909	7.67954	15.8709	TOMM70
Positive Regulation Of Phospholipase C Activity (GO:0010863)	1/36	0.126609	0.238909	7.67954	15.8709	ANG
Protein Destabilization (GO:0031648)	1/36	0.126609	0.238909	7.67954	15.8709	PRKN
Positive Regulation Of Double-Strand Break Repair Via Homologous Recombination (GO:1905168)	1/36	0.126609	0.238909	7.67954	15.8709	MRNIP
Membrane Organization (GO:0061024)	2/167	0.129848	0.240956	3.28103	6.69787	CHP1;PLAAT3
Regulation Of Defense Response To Virus By Host (GO:0050691)	1/37	0.12989	0.240956	7.46584	15.2383	TOMM70
Negative Regulation Of Smooth Muscle Cell Proliferation (GO:0048662)	1/37	0.12989	0.240956	7.46584	15.2383	ANG
Negative Regulation Of Stress-Activated MAPK Cascade (GO:0032873)	1/37	0.12989	0.240956	7.46584	15.2383	PRKN
Aortic Valve Morphogenesis (GO:0003180)	1/37	0.12989	0.240956	7.46584	15.2383	RHOA
Regulation Of Phosphoprotein Phosphatase Activity (GO:0043666)	1/37	0.12989	0.240956	7.46584	15.2383	GNA12
Mitochondrion Disassembly (GO:0061726)	1/37	0.12989	0.240956	7.46584	15.2383	PRKN
Regulation Of Protein Import Into Nucleus (GO:0042306)	1/38	0.133159	0.244784	7.2637	14.6451	CHP1
Metal Ion Transport (GO:0030001)	2/171	0.134903	0.244784	3.20272	6.41568	CHP1;SCN3B
Positive Regulation Of Lipid Biosynthetic Process (GO:0046889)	1/39	0.136416	0.244784	7.07219	14.0881	CHP1
RNA Transport (GO:0050658)	1/39	0.136416	0.244784	7.07219	14.0881	PEG10
Vesicle Cytoskeletal Trafficking (GO:0099518)	1/39	0.136416	0.244784	7.07219	14.0881	RAB1A
Negative Regulation Of Protein Secretion (GO:0050709)	1/39	0.136416	0.244784	7.07219	14.0881	PRKN
Negative Regulation Of Transport (GO:0051051)	1/39	0.136416	0.244784	7.07219	14.0881	PRKN
Regulation Of Mitochondrial Membrane Potential (GO:0051881)	1/39	0.136416	0.244784	7.07219	14.0881	PPA2
Regulation Of Monoatomic Cation Transmembrane Transport (GO:1904062)	1/39	0.136416	0.244784	7.07219	14.0881	NEDD4L
Neuron Projection Extension (GO:1990138)	1/39	0.136416	0.244784	7.07219	14.0881	C9ORF72
Organelle Transport Along Microtubule (GO:0072384)	1/39	0.136416	0.244784	7.07219	14.0881	RAB1A
Carboxylic Acid Transmembrane Transport (GO:1905039)	1/39	0.136416	0.244784	7.07219	14.0881	SLC38A8
Positive Regulation Of Cytokinesis (GO:0032467)	1/39	0.136416	0.244784	7.07219	14.0881	RHOA
Negative Regulation Of Cell-Substrate Adhesion (GO:0010812)	1/39	0.136416	0.244784	7.07219	14.0881	RHOA
Positive Regulation Of Insulin Secretion (GO:0032024)	1/40	0.139661	0.246008	6.89051	13.5642	ACSL4
Establishment Or Maintenance Of Epithelial Cell Apical/Basal Polarity (GO:0045197)	1/40	0.139661	0.246008	6.89051	13.5642	RHOA
Positive Regulation Of Monoatomic Ion Transport (GO:0043270)	1/40	0.139661	0.246008	6.89051	13.5642	SCN3B
Negative Regulation Of Protein Localization (GO:1903828)	1/40	0.139661	0.246008	6.89051	13.5642	NEDD4L
Protein Localization To Chromosome (GO:0034502)	1/40	0.139661	0.246008	6.89051	13.5642	MRNIP
Regulation Of Small Molecule Metabolic Process (GO:0062012)	1/40	0.139661	0.246008	6.89051	13.5642	PRKN
Regulation Of Autophagosome Assembly (GO:2000785)	1/40	0.139661	0.246008	6.89051	13.5642	C9ORF72
Endothelial Cell Migration (GO:0043542)	1/40	0.139661	0.246008	6.89051	13.5642	RHOA
Positive Regulation Of I-kappaB kinase/NF-kappaB Signaling (GO:0043123)	2/175	0.140003	0.246047	3.12804	6.15001	PRKN;RHOA
Regulation Of Dendrite Development (GO:0050773)	1/41	0.142894	0.248286	6.71791	13.0707	NEDD4L
Regulation Of Heart Rate By Cardiac Conduction (GO:0086091)	1/41	0.142894	0.248286	6.71791	13.0707	SCN3B
Acylglycerol Metabolic Process (GO:0006639)	1/41	0.142894	0.248286	6.71791	13.0707	PLAAT3
Non-Canonical Wnt Signaling Pathway (GO:0035567)	1/41	0.142894	0.248286	6.71791	13.0707	RHOA
Carbohydrate Catabolic Process (GO:0016052)	1/41	0.142894	0.248286	6.71791	13.0707	PGM1
Positive Regulation Of ERK1 And ERK2 Cascade (GO:0070374)	2/179	0.145145	0.249924	3.05673	5.89956	DDT;DENND2B
Substantia Nigra Development (GO:0021762)	1/42	0.146114	0.249924	6.55372	12.6052	RHOA
DNA Recombination (GO:0006310)	1/42	0.146114	0.249924	6.55372	12.6052	RAD54B
Positive Regulation Of Neuron Differentiation (GO:0045666)	1/42	0.146114	0.249924	6.55372	12.6052	RHOA
Amino Acid Transmembrane Transport (GO:0003333)	1/42	0.146114	0.249924	6.55372	12.6052	SLC38A8
Potassium Ion Import Across Plasma Membrane (GO:1990573)	1/42	0.146114	0.249924	6.55372	12.6052	ABCC9
Regulation Of Ubiquitin-Dependent Protein Catabolic Process (GO:2000058)	1/42	0.146114	0.249924	6.55372	12.6052	GNA12
Glycolipid Biosynthetic Process (GO:0009247)	1/43	0.149323	0.253157	6.39736	12.1655	DPM1
Positive Regulation Of Stress Fiber Assembly (GO:0051496)	1/43	0.149323	0.253157	6.39736	12.1655	RHOA
Positive Regulation Of Transcription Elongation By RNA Polymerase II (GO:0032968)	1/43	0.149323	0.253157	6.39736	12.1655	MED7
Positive Regulation Of Cell Division (GO:0051781)	1/43	0.149323	0.253157	6.39736	12.1655	RHOA
Phosphate-Containing Compound Metabolic Process (GO:0006796)	2/184	0.151627	0.25409	2.972	5.60618	PPA2;PLAAT3
Establishment Of Protein Localization To Mitochondrion (GO:0072655)	1/44	0.15252	0.25409	6.24827	11.7496	TOMM70
Positive Regulation Of Leukocyte Cell-Cell Adhesion (GO:1903039)	1/44	0.15252	0.25409	6.24827	11.7496	RHOA
Regulation Of Transport (GO:0051049)	1/44	0.15252	0.25409	6.24827	11.7496	PRKN
Mitotic Spindle Assembly (GO:0090307)	1/44	0.15252	0.25409	6.24827	11.7496	RHOA
Response To Unfolded Protein (GO:0006986)	1/44	0.15252	0.25409	6.24827	11.7496	PRKN
Positive Regulation Of Cytokine-Mediated Signaling Pathway (GO:0001961)	1/44	0.15252	0.25409	6.24827	11.7496	PRKN
Regulation Of Cell-Substrate Adhesion (GO:0010810)	1/44	0.15252	0.25409	6.24827	11.7496	RHOA
Regulation Of Cellular Metabolic Process (GO:0031323)	1/45	0.155705	0.257423	6.10596	11.3558	PRKN
Triglyceride Metabolic Process (GO:0006641)	1/45	0.155705	0.257423	6.10596	11.3558	PLAAT3
Hexose Metabolic Process (GO:0019318)	1/45	0.155705	0.257423	6.10596	11.3558	PGM1
Protein Modification By Small Protein Conjugation (GO:0032446)	3/364	0.156412	0.257423	2.25808	4.18932	PRKN;DCUN1D4;NEDD4L
Epithelial Cell Migration (GO:0010631)	1/46	0.158878	0.257423	5.96997	10.9825	RHOA
Positive Regulation Of Peptide Hormone Secretion (GO:0090277)	1/46	0.158878	0.257423	5.96997	10.9825	ACSL4
Amino Acid Transport (GO:0006865)	1/46	0.158878	0.257423	5.96997	10.9825	SLC38A8
Intracellular Protein Transmembrane Transport (GO:0065002)	1/46	0.158878	0.257423	5.96997	10.9825	TOMM70
Cardiac Conduction (GO:0061337)	1/46	0.158878	0.257423	5.96997	10.9825	SCN3B
Cellular Component Disassembly (GO:0022411)	1/46	0.158878	0.257423	5.96997	10.9825	PLAAT3
Mitotic G2/M Transition Checkpoint (GO:0044818)	1/46	0.158878	0.257423	5.96997	10.9825	MRNIP
Response To Hydrogen Peroxide (GO:0042542)	1/46	0.158878	0.257423	5.96997	10.9825	GPX1
Negative Regulation Of Cellular Metabolic Process (GO:0031324)	1/46	0.158878	0.257423	5.96997	10.9825	PRKN
Regulation Of Signal Transduction By P53 Class Mediator (GO:1901796)	1/47	0.16204	0.26047	5.83989	10.6281	RFFL
Protein Monoubiquitination (GO:0006513)	1/47	0.16204	0.26047	5.83989	10.6281	PRKN
Response To Organonitrogen Compound (GO:0010243)	1/47	0.16204	0.26047	5.83989	10.6281	PRKN
Transcription By RNA Polymerase II (GO:0006366)	2/192	0.162115	0.26047	2.84571	5.17762	GTF2E2;MED7
Positive Regulation Of Reactive Oxygen Species Metabolic Process (GO:2000379)	1/48	0.165189	0.263206	5.71535	10.2914	CBR1
Regulation Of DNA Binding (GO:0051101)	1/48	0.165189	0.263206	5.71535	10.2914	PRKN
Chloride Transmembrane Transport (GO:1902476)	1/48	0.165189	0.263206	5.71535	10.2914	GABRB2
Retrograde Vesicle-Mediated Transport, Golgi To Endoplasmic Reticulum (GO:0006890)	1/48	0.165189	0.263206	5.71535	10.2914	ATP9B
Regulation Of Programmed Cell Death (GO:0043067)	2/195	0.166083	0.263881	2.80105	5.02863	TOMM70;PRKN
Positive Regulation Of Protein Metabolic Process (GO:0051247)	2/196	0.167409	0.263881	2.78647	4.9803	PRKN;RAB1A
Unsaturated Fatty Acid Metabolic Process (GO:0033559)	1/49	0.168328	0.263881	5.596	9.9712	GPX1
Autophagy Of Mitochondrion (GO:0000422)	1/49	0.168328	0.263881	5.596	9.9712	PRKN
Nuclear Export (GO:0051168)	1/49	0.168328	0.263881	5.596	9.9712	CHP1
Proton Transmembrane Transport (GO:1902600)	1/49	0.168328	0.263881	5.596	9.9712	ATP5MF
Golgi Vesicle Transport (GO:0048193)	2/197	0.168738	0.263881	2.77204	4.9326	RAB1A;ATP9B
DNA-templated Transcription (GO:0006351)	2/199	0.1714	0.263881	2.74362	4.83908	MTERF4;GTF2E2
Anterograde Trans-Synaptic Signaling (GO:0098916)	2/199	0.1714	0.263881	2.74362	4.83908	GABRB2;HTR3A
Regulation Of Interferon-Beta Production (GO:0032648)	1/50	0.171454	0.263881	5.48152	9.66634	TOMM70
Regulation Of Mitochondrion Organization (GO:0010821)	1/50	0.171454	0.263881	5.48152	9.66634	PRKN
Positive Regulation Of Transport (GO:0051050)	1/50	0.171454	0.263881	5.48152	9.66634	CHP1
Blood Circulation (GO:0008015)	1/50	0.171454	0.263881	5.48152	9.66634	GPX1
Pyruvate Metabolic Process (GO:0006090)	1/50	0.171454	0.263881	5.48152	9.66634	PGM1
Regulation Of TORC1 Signaling (GO:1903432)	1/50	0.171454	0.263881	5.48152	9.66634	C9ORF72
Ribosome Assembly (GO:0042255)	1/50	0.171454	0.263881	5.48152	9.66634	MTERF4
Positive Regulation Of Developmental Growth (GO:0048639)	1/50	0.171454	0.263881	5.48152	9.66634	NEDD4L
Microtubule Bundle Formation (GO:0001578)	1/51	0.174569	0.267069	5.37162	9.37582	CHP1
Positive Regulation Of DNA Recombination (GO:0045911)	1/51	0.174569	0.267069	5.37162	9.37582	MRNIP
Positive Regulation Of Actin Filament Bundle Assembly (GO:0032233)	1/51	0.174569	0.267069	5.37162	9.37582	RHOA
Positive Regulation Of Transcription Initiation By RNA Polymerase II (GO:0060261)	1/52	0.177672	0.270738	5.26603	9.09873	MED7
Regulation Of Protein Localization To Nucleus (GO:1900180)	1/52	0.177672	0.270738	5.26603	9.09873	ORMDL3
Defense Response To Bacterium (GO:0042742)	2/204	0.178086	0.270832	2.67503	4.61574	RAB1A;ANG
Spermatid Development (GO:0007286)	1/53	0.180764	0.271524	5.1645	8.83421	CCDC62
Actin Cytoskeleton Reorganization (GO:0031532)	1/53	0.180764	0.271524	5.1645	8.83421	RHOA
Actin Polymerization Or Depolymerization (GO:0008154)	1/53	0.180764	0.271524	5.1645	8.83421	ANG
Proton Motive Force-Driven Mitochondrial ATP Synthesis (GO:0042776)	1/53	0.180764	0.271524	5.1645	8.83421	ATP5MF
Positive Regulation Of NIK/NF-kappaB Signaling (GO:1901224)	1/53	0.180764	0.271524	5.1645	8.83421	RHOA
Negative Regulation Of Cysteine-Type Endopeptidase Activity (GO:2000117)	1/53	0.180764	0.271524	5.1645	8.83421	GPX1
Protein Stabilization (GO:0050821)	2/208	0.183464	0.271524	2.62256	4.44716	PRKN;CHP1
Regulation Of Focal Adhesion Assembly (GO:0051893)	1/54	0.183844	0.271524	5.0668	8.58148	RHOA
Negative Regulation Of Protein Modification By Small Protein Conjugation Or Removal (GO:1903321)	1/54	0.183844	0.271524	5.0668	8.58148	CHP1
Negative Regulation Of Protein Ubiquitination (GO:0031397)	1/54	0.183844	0.271524	5.0668	8.58148	CHP1
Apical Junction Assembly (GO:0043297)	1/54	0.183844	0.271524	5.0668	8.58148	RHOA
Protein K63-linked Ubiquitination (GO:0070534)	1/54	0.183844	0.271524	5.0668	8.58148	PRKN
Organelle Disassembly (GO:1903008)	1/54	0.183844	0.271524	5.0668	8.58148	PLAAT3
Regulation Of Smooth Muscle Cell Proliferation (GO:0048660)	1/54	0.183844	0.271524	5.0668	8.58148	ANG
Monoatomic Anion Transmembrane Transport (GO:0098656)	1/54	0.183844	0.271524	5.0668	8.58148	GABRB2
Phosphatidylcholine Metabolic Process (GO:0046470)	1/55	0.186913	0.274998	4.97272	8.33981	PLAAT3
Ceramide Metabolic Process (GO:0006672)	1/55	0.186913	0.274998	4.97272	8.33981	ORMDL3
RNA Polymerase II Preinitiation Complex Assembly (GO:0051123)	1/56	0.18997	0.276845	4.88206	8.10855	MED7
Mitotic DNA Damage Checkpoint Signaling (GO:0044773)	1/56	0.18997	0.276845	4.88206	8.10855	MRNIP
Positive Regulation Of DNA-templated Transcription Initiation (GO:2000144)	1/56	0.18997	0.276845	4.88206	8.10855	MED7
Positive Regulation Of DNA-templated Transcription, Elongation (GO:0032786)	1/56	0.18997	0.276845	4.88206	8.10855	MED7
Positive Regulation Of Cellular Metabolic Process (GO:0031325)	1/56	0.18997	0.276845	4.88206	8.10855	CBR1
Regulation Of GTPase Activity (GO:0043087)	2/214	0.191577	0.278657	2.54756	4.20975	C9ORF72;ZC3H15
Striated Muscle Contraction (GO:0006941)	1/57	0.193017	0.279165	4.79464	7.88709	SCN3B
Membrane Lipid Biosynthetic Process (GO:0046467)	1/57	0.193017	0.279165	4.79464	7.88709	ORMDL3
Regulation Of Transcription Initiation By RNA Polymerase II (GO:0060260)	1/57	0.193017	0.279165	4.79464	7.88709	MED7
Positive Regulation Of Mitochondrion Organization (GO:0010822)	1/58	0.196051	0.28091	4.71029	7.67484	PRKN
Regulation Of Neuron Death (GO:1901214)	1/58	0.196051	0.28091	4.71029	7.67484	PRKN
mRNA Transport (GO:0051028)	1/58	0.196051	0.28091	4.71029	7.67484	PEG10
Response To Organic Cyclic Compound (GO:0014070)	1/58	0.196051	0.28091	4.71029	7.67484	STRN3
Selective Autophagy (GO:0061912)	1/58	0.196051	0.28091	4.71029	7.67484	PRKN
Transcription Preinitiation Complex Assembly (GO:0070897)	1/59	0.199075	0.281047	4.62884	7.4713	MED7
Glucose Metabolic Process (GO:0006006)	1/59	0.199075	0.281047	4.62884	7.4713	PGM1
Positive Regulation Of Protein Binding (GO:0032092)	1/59	0.199075	0.281047	4.62884	7.4713	PRKN
Cellular Response To Chemokine (GO:1990869)	1/59	0.199075	0.281047	4.62884	7.4713	RHOA
Protein Targeting To Mitochondrion (GO:0006626)	1/59	0.199075	0.281047	4.62884	7.4713	TOMM70
Phospholipid Transport (GO:0015914)	1/59	0.199075	0.281047	4.62884	7.4713	ATP9B
Cilium Movement (GO:0003341)	1/59	0.199075	0.281047	4.62884	7.4713	CFAP70
Negative Regulation Of Cytokine-Mediated Signaling Pathway (GO:0001960)	1/59	0.199075	0.281047	4.62884	7.4713	RFFL
Vesicle-Mediated Transport (GO:0016192)	3/411	0.200116	0.281998	1.99316	3.20671	RAB1A;C9ORF72;ATP9B
Proton Motive Force-Driven ATP Synthesis (GO:0015986)	1/60	0.202087	0.284255	4.55016	7.27596	ATP5MF
Positive Regulation Of Interleukin-8 Production (GO:0032757)	1/61	0.205089	0.2869	4.4741	7.08838	RAB1A
Negative Regulation Of Intrinsic Apoptotic Signaling Pathway (GO:2001243)	1/61	0.205089	0.2869	4.4741	7.08838	PRKN
Autophagosome Organization (GO:1905037)	1/61	0.205089	0.2869	4.4741	7.08838	RAB1A
Organelle Organization (GO:0006996)	3/418	0.206868	0.288864	1.95884	3.08648	PRKN;RAB1A;PLAAT3
Negative Regulation Of Kinase Activity (GO:0033673)	1/62	0.208079	0.288977	4.40053	6.90813	CHP1
Cell Junction Organization (GO:0034330)	1/62	0.208079	0.288977	4.40053	6.90813	RHOA
Protein Lipidation (GO:0006497)	1/62	0.208079	0.288977	4.40053	6.90813	DPM1
Cellular Response To Lipid (GO:0071396)	2/228	0.210683	0.291533	2.38805	3.71914	RHOA;CCDC62
Inorganic Anion Transmembrane Transport (GO:0098661)	1/63	0.211058	0.291533	4.32934	6.73482	GABRB2
Oxidative Phosphorylation (GO:0006119)	1/63	0.211058	0.291533	4.32934	6.73482	ATP5MF
Positive Regulation Of Macroautophagy (GO:0016239)	1/64	0.214025	0.292997	4.2604	6.5681	C9ORF72
Positive Regulation Of Type I Interferon Production (GO:0032481)	1/64	0.214025	0.292997	4.2604	6.5681	TOMM70
Protein N-linked Glycosylation (GO:0006487)	1/64	0.214025	0.292997	4.2604	6.5681	DPM1
Cellular Response To Virus (GO:0098586)	1/64	0.214025	0.292997	4.2604	6.5681	TOMM70
Negative Regulation Of Cell Death (GO:0060548)	1/64	0.214025	0.292997	4.2604	6.5681	PRKN
Negative Regulation Of Intracellular Signal Transduction (GO:1902532)	2/231	0.214804	0.293541	2.3564	3.62421	RFFL;PBLD
Regulation Of I-kappaB kinase/NF-kappaB Signaling (GO:0043122)	2/232	0.21618	0.294896	2.34604	3.5933	PRKN;RHOA
Autophagosome Assembly (GO:0000045)	1/65	0.216982	0.294942	4.19362	6.4076	RAB1A
Regulation Of Cell-Matrix Adhesion (GO:0001952)	1/65	0.216982	0.294942	4.19362	6.4076	RHOA
Positive Regulation Of GTPase Activity (GO:0043547)	2/234	0.218934	0.297069	2.32558	3.53252	C9ORF72;ZC3H15
Response To Reactive Oxygen Species (GO:0000302)	1/66	0.219928	0.297892	4.1289	6.25303	GPX1
Protein Ubiquitination (GO:0016567)	3/434	0.222495	0.30031	1.88457	2.83223	PRKN;NEDD4L;UBE2J2
Regulation Of Cell Migration (GO:0030334)	3/434	0.222495	0.30031	1.88457	2.83223	GNA12;RFFL;RHOA
Phospholipid Metabolic Process (GO:0006644)	1/69	0.2287	0.308144	3.94614	5.82192	PLAAT3
Regulation Of Notch Signaling Pathway (GO:0008593)	1/70	0.231603	0.310963	3.88876	5.68821	CCNC
Regulation Of Actin Filament-Based Process (GO:0032970)	1/70	0.231603	0.310963	3.88876	5.68821	RHOA
Regulation Of ERK1 And ERK2 Cascade (GO:0070372)	2/244	0.232745	0.311577	2.22835	3.24851	DDT;DENND2B
Synapse Assembly (GO:0007416)	1/71	0.234494	0.311577	3.83301	5.55911	GABRB2
Regulation Of Double-Strand Break Repair Via Homologous Recombination (GO:0010569)	1/71	0.234494	0.311577	3.83301	5.55911	MRNIP
Negative Regulation Of Supramolecular Fiber Organization (GO:1902904)	1/71	0.234494	0.311577	3.83301	5.55911	PRKN
Protein Autoubiquitination (GO:0051865)	1/71	0.234494	0.311577	3.83301	5.55911	PRKN
Cell-Cell Junction Assembly (GO:0007043)	1/71	0.234494	0.311577	3.83301	5.55911	RHOA
Positive Regulation Of Protein Localization To Nucleus (GO:1900182)	1/72	0.237375	0.313237	3.77884	5.43439	ORMDL3
Cellular Response To Hypoxia (GO:0071456)	1/72	0.237375	0.313237	3.77884	5.43439	EGLN1
Response To Ionizing Radiation (GO:0010212)	1/72	0.237375	0.313237	3.77884	5.43439	MRNIP
Negative Regulation Of Cell Adhesion (GO:0007162)	1/72	0.237375	0.313237	3.77884	5.43439	RHOA
Positive Regulation Of Secretion By Cell (GO:1903532)	1/73	0.240245	0.315939	3.72616	5.31386	ANG
Cellular Response To Decreased Oxygen Levels (GO:0036294)	1/73	0.240245	0.315939	3.72616	5.31386	EGLN1
Negative Regulation Of Neuron Apoptotic Process (GO:0043524)	1/74	0.243105	0.319153	3.67494	5.19732	PRKN
Regulation Of Stress Fiber Assembly (GO:0051492)	1/75	0.245954	0.322342	3.62509	5.0846	RHOA
Sphingolipid Biosynthetic Process (GO:0030148)	1/77	0.25162	0.326978	3.52934	4.86991	ORMDL3
Actomyosin Structure Organization (GO:0031032)	1/77	0.25162	0.326978	3.52934	4.86991	RHOA
Regulation Of Transcription Elongation By RNA Polymerase II (GO:0034243)	1/77	0.25162	0.326978	3.52934	4.86991	MED7
Chloride Transport (GO:0006821)	1/77	0.25162	0.326978	3.52934	4.86991	GABRB2
Positive Regulation Of Endothelial Cell Proliferation (GO:0001938)	1/77	0.25162	0.326978	3.52934	4.86991	ANG
Positive Regulation Of Tumor Necrosis Factor Production (GO:0032760)	1/78	0.254437	0.328969	3.48333	4.76764	DDT
Organonitrogen Compound Catabolic Process (GO:1901565)	1/78	0.254437	0.328969	3.48333	4.76764	PRKN
Proteolysis Involved In Protein Catabolic Process (GO:0051603)	1/78	0.254437	0.328969	3.48333	4.76764	PRKN
Positive Regulation Of Protein Modification By Small Protein Conjugation Or Removal (GO:1903322)	1/79	0.257244	0.330927	3.4385	4.66855	DCUN1D4
Positive Regulation Of Catabolic Process (GO:0009896)	1/79	0.257244	0.330927	3.4385	4.66855	PRKN
Positive Regulation Of Endocytosis (GO:0045807)	1/79	0.257244	0.330927	3.4385	4.66855	NEDD4L
Regulation Of Cytokinesis (GO:0032465)	1/80	0.26004	0.333407	3.3948	4.57252	RHOA
Regulation Of Organelle Assembly (GO:1902115)	1/80	0.26004	0.333407	3.3948	4.57252	C9ORF72
Spindle Assembly (GO:0051225)	1/81	0.262826	0.333637	3.3522	4.47941	RHOA
Regulation Of Interleukin-8 Production (GO:0032677)	1/81	0.262826	0.333637	3.3522	4.47941	RAB1A
Activation Of Protein Kinase Activity (GO:0032147)	1/81	0.262826	0.333637	3.3522	4.47941	ANG
Macromolecule Modification (GO:0043412)	1/81	0.262826	0.333637	3.3522	4.47941	PLOD2
Cytoskeleton-Dependent Cytokinesis (GO:0061640)	1/81	0.262826	0.333637	3.3522	4.47941	RHOA
Negative Regulation Of NF-kappaB Transcription Factor Activity (GO:0032088)	1/81	0.262826	0.333637	3.3522	4.47941	CHP1
Positive Regulation Of Tumor Necrosis Factor Superfamily Cytokine Production (GO:1903557)	1/82	0.265602	0.334946	3.31064	4.38911	DDT
Regulation Of Phosphorylation (GO:0042325)	1/82	0.265602	0.334946	3.31064	4.38911	ANG
Cellular Response To Organic Substance (GO:0071310)	1/82	0.265602	0.334946	3.31064	4.38911	RHOA
Sodium Ion Transmembrane Transport (GO:0035725)	1/82	0.265602	0.334946	3.31064	4.38911	SCN3B
Epigenetic Regulation Of Gene Expression (GO:0040029)	1/83	0.268367	0.335132	3.27011	4.30149	GPX1
Vascular Transport (GO:0010232)	1/83	0.268367	0.335132	3.27011	4.30149	ABCC9
Positive Regulation Of Proteasomal Ubiquitin-Dependent Protein Catabolic Process (GO:0032436)	1/83	0.268367	0.335132	3.27011	4.30149	PRKN
Positive Regulation Of Ubiquitin-Dependent Protein Catabolic Process (GO:2000060)	1/83	0.268367	0.335132	3.27011	4.30149	PRKN
Phospholipase C-activating G Protein-Coupled Receptor Signaling Pathway (GO:0007200)	1/83	0.268367	0.335132	3.27011	4.30149	PTGER3
Regulation Of NIK/NF-kappaB Signaling (GO:1901222)	1/83	0.268367	0.335132	3.27011	4.30149	RHOA
Regulation Of Cysteine-Type Endopeptidase Activity Involved In Apoptotic Process (GO:0043281)	1/84	0.271122	0.336384	3.23054	4.21646	GPX1
Positive Regulation Of Protein Ubiquitination (GO:0031398)	1/84	0.271122	0.336384	3.23054	4.21646	DCUN1D4
Purine Ribonucleotide Metabolic Process (GO:0009150)	1/84	0.271122	0.336384	3.23054	4.21646	ACAT1
Positive Regulation Of Double-Strand Break Repair (GO:2000781)	1/84	0.271122	0.336384	3.23054	4.21646	MRNIP
Chemical Synaptic Transmission (GO:0007268)	2/273	0.273038	0.336528	1.98696	2.57936	GABRB2;HTR3A
Transport Across Blood-Brain Barrier (GO:0150104)	1/85	0.273867	0.336528	3.19192	4.1339	ABCC9
mRNA Metabolic Process (GO:0016071)	1/85	0.273867	0.336528	3.19192	4.1339	ANG
Macromolecule Catabolic Process (GO:0009057)	1/85	0.273867	0.336528	3.19192	4.1339	PRKN
Mitotic Spindle Organization (GO:0007052)	1/85	0.273867	0.336528	3.19192	4.1339	RHOA
Defense Response To Gram-positive Bacterium (GO:0050830)	1/85	0.273867	0.336528	3.19192	4.1339	ANG
Positive Regulation Of Transcription By RNA Polymerase II (GO:0045944)	5/938	0.275409	0.337882	1.45399	1.87491	PRKN;CASZ1;CCNC;MED7;CCDC62
Regulation Of Double-Strand Break Repair (GO:2000779)	1/88	0.282041	0.344367	3.08139	3.90013	MRNIP
Negative Regulation Of Neuron Death (GO:1901215)	1/88	0.282041	0.344367	3.08139	3.90013	PRKN
Negative Regulation Of Protein Kinase Activity (GO:0006469)	1/88	0.282041	0.344367	3.08139	3.90013	CHP1
Cellular Response To Chemical Stress (GO:0062197)	1/89	0.284745	0.346567	3.04622	3.82655	GPX1
Sodium Ion Transport (GO:0006814)	1/89	0.284745	0.346567	3.04622	3.82655	SCN3B
Positive Regulation Of Proteasomal Protein Catabolic Process (GO:1901800)	1/90	0.287439	0.349293	3.01184	3.755	PRKN
Regulation Of Epithelial Cell Proliferation (GO:0050678)	1/91	0.290123	0.351443	2.97823	3.68541	GPX1
Positive Regulation Of Binding (GO:0051099)	1/91	0.290123	0.351443	2.97823	3.68541	PRKN
Steroid Metabolic Process (GO:0008202)	1/92	0.292797	0.353567	2.94535	3.6177	CBR1
Positive Regulation Of Protein Catabolic Process (GO:0045732)	1/92	0.292797	0.353567	2.94535	3.6177	PRKN
Regulation Of Endothelial Cell Proliferation (GO:0001936)	1/93	0.295462	0.355109	2.91319	3.55181	ANG
Cytoplasmic Translation (GO:0002181)	1/93	0.295462	0.355109	2.91319	3.55181	ZC3H15
Negative Regulation Of Amide Metabolic Process (GO:0034249)	1/93	0.295462	0.355109	2.91319	3.55181	ORMDL3
Sphingolipid Metabolic Process (GO:0006665)	1/94	0.298116	0.356625	2.88172	3.48767	ORMDL3
Regulation Of mRNA Splicing, Via Spliceosome (GO:0048024)	1/94	0.298116	0.356625	2.88172	3.48767	QKI
Peptidyl-Lysine Modification (GO:0018205)	1/94	0.298116	0.356625	2.88172	3.48767	PLOD2
Cell Junction Assembly (GO:0034329)	1/95	0.30076	0.358671	2.85092	3.42521	RHOA
Recombinational Repair (GO:0000725)	1/95	0.30076	0.358671	2.85092	3.42521	RAD54B
Regulation Of Macroautophagy (GO:0016241)	1/96	0.303395	0.360693	2.82077	3.36438	C9ORF72
Positive Regulation Of Supramolecular Fiber Organization (GO:1902905)	1/96	0.303395	0.360693	2.82077	3.36438	GPX1
Monocarboxylic Acid Metabolic Process (GO:0032787)	1/97	0.30602	0.363112	2.79124	3.30513	ACSL4
Regulation Of Intracellular Signal Transduction (GO:1902531)	2/297	0.306376	0.363112	1.82308	2.1566	GNA12;RFFL
Phosphatidylinositol Biosynthetic Process (GO:0006661)	1/98	0.308635	0.365226	2.76233	3.24738	DPM1
Regulation Of Organelle Organization (GO:0033043)	1/100	0.313836	0.369672	2.70625	3.13623	PRKN
Protein Complex Oligomerization (GO:0051259)	1/100	0.313836	0.369672	2.70625	3.13623	PEG10
Response To UV (GO:0009411)	1/100	0.313836	0.369672	2.70625	3.13623	GPX1
Protein Catabolic Process (GO:0030163)	1/102	0.318999	0.374032	2.65239	3.03054	PRKN
Regulation Of Protein Secretion (GO:0050708)	1/102	0.318999	0.374032	2.65239	3.03054	ANG
Regulation Of RNA Splicing (GO:0043484)	1/102	0.318999	0.374032	2.65239	3.03054	QKI
Inorganic Cation Import Across Plasma Membrane (GO:0098659)	1/103	0.321565	0.375894	2.62626	2.97963	ABCC9
Mitochondrial Gene Expression (GO:0140053)	1/103	0.321565	0.375894	2.62626	2.97963	MTERF4
Positive Regulation Of Inflammatory Response (GO:0050729)	1/104	0.324123	0.376838	2.60063	2.92996	DDT
Positive Regulation Of Kinase Activity (GO:0033674)	1/104	0.324123	0.376838	2.60063	2.92996	MRNIP
Macroautophagy (GO:0016236)	1/104	0.324123	0.376838	2.60063	2.92996	PRKN
Positive Regulation Of MAPK Cascade (GO:0043410)	2/310	0.324336	0.376838	1.74497	1.9648	DDT;DENND2B
Regulation Of Neuron Apoptotic Process (GO:0043523)	1/105	0.326671	0.378406	2.57549	2.88147	PRKN
Cellular Response To Organonitrogen Compound (GO:0071417)	1/105	0.326671	0.378406	2.57549	2.88147	GABRB2
Positive Regulation Of Cell Growth (GO:0030307)	1/106	0.329209	0.380772	2.55084	2.83414	NEDD4L
Regulation Of Cellular Response To Stress (GO:0080135)	1/107	0.331738	0.38312	2.52664	2.78793	PRKN
Glycerophospholipid Biosynthetic Process (GO:0046474)	1/108	0.334257	0.38545	2.5029	2.74279	ABHD5
Negative Regulation Of Developmental Process (GO:0051093)	1/109	0.336767	0.386026	2.4796	2.69871	PRKN
Extracellular Structure Organization (GO:0043062)	1/109	0.336767	0.386026	2.4796	2.69871	MMP16
Regulation Of Wnt Signaling Pathway (GO:0030111)	1/109	0.336767	0.386026	2.4796	2.69871	PRKN
Positive Regulation Of Cysteine-Type Endopeptidase Activity Involved In Apoptotic Process (GO:0043280)	1/109	0.336767	0.386026	2.4796	2.69871	ACVR1C
External Encapsulating Structure Organization (GO:0045229)	1/110	0.339268	0.386584	2.45673	2.65564	MMP16
Adenylate Cyclase-Activating G Protein-Coupled Receptor Signaling Pathway (GO:0007189)	1/110	0.339268	0.386584	2.45673	2.65564	PTGER3
Regulation Of JNK Cascade (GO:0046328)	1/110	0.339268	0.386584	2.45673	2.65564	PRKN
Response To Lipid (GO:0033993)	1/110	0.339268	0.386584	2.45673	2.65564	STRN3
RNA Metabolic Process (GO:0016070)	1/111	0.341759	0.387698	2.43428	2.61356	ANG
Mitotic Sister Chromatid Segregation (GO:0000070)	1/111	0.341759	0.387698	2.43428	2.61356	RHOA
Double-Strand Break Repair Via Homologous Recombination (GO:0000724)	1/111	0.341759	0.387698	2.43428	2.61356	RAD54B
Protein Deubiquitination (GO:0016579)	1/112	0.344242	0.388791	2.41222	2.57242	PRKN
Regulation Of Protein Serine/Threonine Kinase Activity (GO:0071900)	1/112	0.344242	0.388791	2.41222	2.57242	RHOA
Small GTPase Mediated Signal Transduction (GO:0007264)	1/112	0.344242	0.388791	2.41222	2.57242	CHP1
Intracellular Protein Transport (GO:0006886)	2/325	0.344917	0.388982	1.66267	1.76983	RAB1A;CHP1
Positive Regulation Of Cellular Component Organization (GO:0051130)	1/113	0.346715	0.390435	2.39056	2.53221	GPX1
Regulation Of Cytoskeleton Organization (GO:0051493)	1/114	0.349178	0.390917	2.36929	2.4929	RHOA
Protein Modification By Small Protein Removal (GO:0070646)	1/114	0.349178	0.390917	2.36929	2.4929	PRKN
Response To Endoplasmic Reticulum Stress (GO:0034976)	1/114	0.349178	0.390917	2.36929	2.4929	PRKN
Negative Regulation Of Canonical Wnt Signaling Pathway (GO:0090090)	1/114	0.349178	0.390917	2.36929	2.4929	PRKN
Endoplasmic Reticulum To Golgi Vesicle-Mediated Transport (GO:0006888)	1/115	0.351633	0.392636	2.34839	2.45446	RAB1A
Proteolysis (GO:0006508)	2/330	0.351737	0.392636	1.6369	1.71035	PSMB5;MMP16
Positive Regulation Of Protein Serine/Threonine Kinase Activity (GO:0071902)	1/117	0.356515	0.395669	2.30767	2.38008	RHOA
Protein Processing (GO:0016485)	1/117	0.356515	0.395669	2.30767	2.38008	MMP16
Cellular Response To Molecule Of Bacterial Origin (GO:0071219)	1/117	0.356515	0.395669	2.30767	2.38008	RHOA
Cellular Response To Oxidative Stress (GO:0034599)	1/117	0.356515	0.395669	2.30767	2.38008	GPX1
Regulation Of Protein Binding (GO:0043393)	1/118	0.358942	0.397215	2.28783	2.34409	PRKN
Positive Regulation Of Cell Cycle Process (GO:0090068)	1/118	0.358942	0.397215	2.28783	2.34409	RHOA
Organonitrogen Compound Biosynthetic Process (GO:1901566)	1/123	0.370943	0.40873	2.19351	2.17532	ORMDL3
Positive Regulation Of Epithelial Cell Proliferation (GO:0050679)	1/123	0.370943	0.40873	2.19351	2.17532	ANG
Regulation Of Cell Motility (GO:2000145)	1/123	0.370943	0.40873	2.19351	2.17532	RHOA
Cellular Response To Lipopolysaccharide (GO:0071222)	1/124	0.373317	0.410168	2.17557	2.14364	RHOA
Positive Regulation Of Defense Response (GO:0031349)	1/124	0.373317	0.410168	2.17557	2.14364	DDT
Response To Cytokine (GO:0034097)	1/125	0.375682	0.412176	2.15791	2.11262	RHOA
Regulation Of Tumor Necrosis Factor Production (GO:0032680)	1/127	0.380385	0.416741	2.12344	2.05246	DDT
Protein Homooligomerization (GO:0051260)	1/129	0.385053	0.420655	2.09005	1.9947	PEG10
Protein Targeting (GO:0006605)	1/129	0.385053	0.420655	2.09005	1.9947	TOMM70
Golgi Organization (GO:0007030)	1/130	0.387374	0.42199	2.07375	1.96667	RAB1A
Transmembrane Receptor Protein Serine/Threonine Kinase Signaling Pathway (GO:0007178)	1/130	0.387374	0.42199	2.07375	1.96667	ACVR1C
Non-Membrane-Bounded Organelle Assembly (GO:0140694)	1/135	0.39885	0.433263	1.99587	1.83454	C9ORF72
Cellular Response To Metal Ion (GO:0071248)	1/135	0.39885	0.433263	1.99587	1.83454	PRKN
Potassium Ion Transmembrane Transport (GO:0071805)	1/137	0.403381	0.436948	1.96632	1.78517	ABCC9
Protein Localization To Plasma Membrane (GO:0072659)	1/137	0.403381	0.436948	1.96632	1.78517	SCN3B
Negative Regulation Of Wnt Signaling Pathway (GO:0030178)	1/140	0.410114	0.443616	1.92359	1.71453	PRKN
Protein Localization To Cell Periphery (GO:1990778)	1/142	0.414561	0.447796	1.89611	1.66959	SCN3B
Positive Regulation Of Transferase Activity (GO:0051347)	1/143	0.416772	0.449299	1.88266	1.64774	DCUN1D4
Negative Regulation Of Cell Population Proliferation (GO:0008285)	2/379	0.417123	0.449299	1.42059	1.24213	ACVR1C;ANG
Skeletal System Development (GO:0001501)	1/149	0.429866	0.462377	1.80579	1.52459	MMP16
Epithelium Development (GO:0060429)	1/154	0.440557	0.473213	1.74633	1.4315	CBR1
Positive Regulation Of Response To External Stimulus (GO:0032103)	1/155	0.442671	0.474158	1.73491	1.41383	DDT
Cellular Response To Growth Factor Stimulus (GO:0071363)	1/155	0.442671	0.474158	1.73491	1.41383	ACVR1C
Response To Lipopolysaccharide (GO:0032496)	1/159	0.451049	0.482459	1.69064	1.34605	RHOA
Cellular Response To Oxygen-Containing Compound (GO:1901701)	2/406	0.451771	0.48256	1.32382	1.05188	RHOA;CCDC62
Double-Strand Break Repair (GO:0006302)	1/168	0.469448	0.500745	1.5988	1.20901	RAD54B
Generation Of Neurons (GO:0048699)	1/172	0.477429	0.508552	1.56109	1.15417	ACSL4
Neuron Differentiation (GO:0030182)	1/173	0.479406	0.50995	1.55193	1.14099	ACSL4
Nervous System Development (GO:0007399)	2/433	0.485258	0.514784	1.23917	0.896013	PRKN;ACVR1C
Extracellular Matrix Organization (GO:0030198)	1/176	0.485292	0.514784	1.5251	1.10265	MMP16
Regulation Of Apoptotic Process (GO:0042981)	3/705	0.495655	0.525053	1.14097	0.800815	TOMM70;PRKN;ACVR1C
Negative Regulation Of Macromolecule Metabolic Process (GO:0010605)	1/186	0.504441	0.533623	1.44193	0.986719	PRKN
Axonogenesis (GO:0007409)	1/188	0.508185	0.536845	1.42636	0.965518	C9ORF72
Protein Localization To Membrane (GO:0072657)	1/192	0.515591	0.54392	1.39621	0.924907	SCN3B
Regulation Of Cell Differentiation (GO:0045595)	1/193	0.517425	0.545106	1.38887	0.915111	CASZ1
Endomembrane System Organization (GO:0010256)	1/196	0.522886	0.550105	1.36729	0.886539	RAB1A
Regulation Of Angiogenesis (GO:0045765)	1/205	0.538907	0.566184	1.30637	0.807615	EGLN1
Regulation Of Canonical Wnt Signaling Pathway (GO:0060828)	1/207	0.542395	0.56867	1.29356	0.791349	PRKN
Negative Regulation Of Apoptotic Process (GO:0043066)	2/482	0.542754	0.56867	1.10987	0.678244	PRKN;GPX1
Positive Regulation Of Protein Modification Process (GO:0031401)	1/225	0.572633	0.599159	1.18853	0.662615	CHP1
Chromatin Remodeling (GO:0006338)	1/228	0.577478	0.603405	1.17264	0.643879	GPX1
Negative Regulation Of Multicellular Organismal Process (GO:0051241)	1/231	0.582268	0.606759	1.15717	0.625825	ACVR1C
Positive Regulation Of Phosphorylation (GO:0042327)	1/231	0.582268	0.606759	1.15717	0.625825	ANG
Positive Regulation Of Developmental Process (GO:0051094)	1/233	0.585432	0.60923	1.14708	0.614151	PRKN
Translation (GO:0006412)	1/234	0.587005	0.61004	1.14209	0.60842	ZC3H15
Positive Regulation Of Intracellular Signal Transduction (GO:1902533)	2/525	0.589504	0.611636	1.01637	0.537125	PRKN;RHOA
Inflammatory Response (GO:0006954)	1/236	0.590133	0.611636	1.13226	0.597163	PTGER3
Regulation Of Inflammatory Response (GO:0050727)	1/240	0.596319	0.617215	1.11308	0.575441	DDT
Positive Regulation Of Programmed Cell Death (GO:0043068)	1/245	0.603923	0.624243	1.09	0.549695	ACVR1C
Cellular Component Assembly (GO:0022607)	1/260	0.625897	0.646087	1.02609	0.480794	RHOA
Negative Regulation Of Signal Transduction (GO:0009968)	1/267	0.635735	0.655362	0.99873	0.452398	CCNC
Positive Regulation Of Apoptotic Process (GO:0043065)	1/270	0.639873	0.658743	0.987441	0.440879	ACVR1C
Central Nervous System Development (GO:0007417)	1/283	0.657274	0.674848	0.941298	0.39502	PRKN
Positive Regulation Of Cell Differentiation (GO:0045597)	1/283	0.657274	0.674848	0.941298	0.39502	RHOA
Cellular Response To Cytokine Stimulus (GO:0071345)	1/308	0.688439	0.705902	0.863544	0.322386	RHOA
Positive Regulation Of DNA-templated Transcription (GO:0045893)	4/1243	0.693174	0.70981	0.849663	0.31138	PRKN;CASZ1;CCNC;CCDC62
Protein Transport (GO:0015031)	1/313	0.694327	0.710044	0.849489	0.309904	RAB1A
Positive Regulation Of Cytokine Production (GO:0001819)	1/320	0.702387	0.717332	0.830552	0.293409	RAB1A
Negative Regulation Of Gene Expression (GO:0010629)	1/336	0.720031	0.734375	0.790238	0.259562	PRKN
Protein Localization (GO:0008104)	1/351	0.735633	0.749292	0.755792	0.232046	RAB1A
Positive Regulation Of Macromolecule Metabolic Process (GO:0010604)	1/364	0.748459	0.761346	0.728241	0.211	PRKN
Protein Modification Process (GO:0036211)	2/711	0.751291	0.763216	0.742547	0.21234	ACVR1C;PLOD2
Positive Regulation Of Protein Phosphorylation (GO:0001934)	1/377	0.76067	0.771723	0.702595	0.192199	MRNIP
DNA Damage Response (GO:0006974)	1/384	0.767001	0.77712	0.689507	0.182903	MRNIP
Regulation Of Transcription By RNA Polymerase II (GO:0006357)	6/2028	0.784977	0.793872	0.769922	0.186399	PRKN;CASZ1;MAGEA8;CCNC;MED7;CCDC62
Negative Regulation Of Transcription By RNA Polymerase II (GO:0000122)	2/763	0.785603	0.793872	0.689936	0.166484	PRKN;MAGEA8
Phosphorylation (GO:0016310)	1/429	0.803933	0.811328	0.615591	0.134346	ACVR1C
Positive Regulation Of Gene Expression (GO:0010628)	1/480	0.838841	0.845446	0.548609	0.0964092	PRKN
Protein Phosphorylation (GO:0006468)	1/500	0.850789	0.856364	0.526079	0.0850097	ACVR1C
Positive Regulation Of Nucleic Acid-Templated Transcription (GO:1903508)	1/557	0.880251	0.88486	0.470761	0.0600445	CASZ1
Negative Regulation Of DNA-templated Transcription (GO:0045892)	2/1025	0.902747	0.906288	0.50622	0.0517926	PRKN;MAGEA8
Regulation Of Gene Expression (GO:0010468)	2/1127	0.929646	0.932073	0.457839	0.0334002	PRKN;GPX1
Regulation Of Cell Population Proliferation (GO:0042127)	1/766	0.946841	0.948075	0.338456	0.018488	RHOA
Regulation Of DNA-templated Transcription (GO:0006355)	2/1922	0.995456	0.995456	0.256921	0.00117009	CASZ1;MED7

## Sheet: GO Cellular Compartments
Term	Overlap	P-value	Adjusted p-value	Odds Ratio	Combined Score	Genes
Mitochondrial Outer Membrane Translocase Complex (GO:0005742)	2/21	0.00278234	0.179373	28.7037	168.906	TOMM70;CHCHD3
Endoplasmic Reticulum Membrane (GO:0005789)	8/801	0.0101309	0.179373	2.88073	13.2288	DPM1;CYB5A;CYP4F3;UBXN8;PLOD2;ACSL4;UBE2J2;RHOA
Mitochondrial Membrane (GO:0031966)	6/540	0.0157858	0.179373	3.15763	13.0999	TOMM70;CYB5A;CHCHD3;ACSL4;CRLS1;ATP5MF
Activin Receptor Complex (GO:0048179)	1/5	0.0186116	0.179373	67.3007	268.124	ACVR1C
Mitochondrial Outer Membrane (GO:0005741)	3/151	0.0191766	0.179373	5.56785	22.0156	TOMM70;CYB5A;ACSL4
Extracellular Membrane-Bounded Organelle (GO:0065010)	2/57	0.019387	0.179373	9.89788	39.0289	CBR1;PEG10
Serine/Threonine Protein Kinase Complex (GO:1902554)	2/60	0.0213464	0.179373	9.38451	36.101	ACVR1C;CCNC
Extracellular Vesicle (GO:1903561)	2/60	0.0213464	0.179373	9.38451	36.101	CBR1;PEG10
Neurotransmitter Receptor Complex (GO:0098878)	1/6	0.0222927	0.179373	53.8378	204.772	HTR3A
Serine C-palmitoyltransferase Complex (GO:0017059)	1/7	0.0259602	0.179373	44.8626	163.802	ORMDL3
MICOS Complex (GO:0061617)	1/7	0.0259602	0.179373	44.8626	163.802	CHCHD3
Voltage-Gated Sodium Channel Complex (GO:0001518)	1/7	0.0259602	0.179373	44.8626	163.802	SCN3B
Organelle Outer Membrane (GO:0031968)	3/170	0.0260845	0.179373	4.92964	17.9755	TOMM70;CYB5A;ACSL4
9+2 Motile Cilium (GO:0097729)	2/70	0.028436	0.179373	8.0004	28.4822	CFAP221;CFAP70
Motile Cilium (GO:0031514)	2/73	0.0307229	0.179373	7.6612	26.682	CFAP221;CFAP70
Ficolin-1-Rich Granule (GO:0101002)	3/184	0.0319208	0.179373	4.54512	15.6557	PSMD12;PGM1;RHOA
Extrinsic Component Of Cytoplasmic Side Of Plasma Membrane (GO:0031234)	2/77	0.0338816	0.179373	7.25114	24.5443	GNA12;RHOA
Lipid Droplet (GO:0005811)	2/82	0.0379996	0.181643	6.79623	22.2249	ACSL4;ABHD5
Intracellular Organelle Lumen (GO:0070013)	7/856	0.0412083	0.181643	2.31296	7.3763	PSMD12;GPX1;MMP16;PPA2;MTERF4;PGM1;ACAT1
MIB Complex (GO:0140275)	1/12	0.044095	0.181643	24.4644	76.3633	CHCHD3
SAM Complex (GO:0001401)	1/12	0.044095	0.181643	24.4644	76.3633	CHCHD3
Mitochondrial Matrix (GO:0005759)	4/355	0.0444017	0.181643	3.14177	9.78496	GPX1;PPA2;MTERF4;ACAT1
Lytic Vacuole (GO:0000323)	3/223	0.0514523	0.189922	3.73201	11.0732	PLAAT3;RFFL;C9ORF72
Cation-Transporting ATPase Complex (GO:0090533)	1/15	0.0548156	0.189922	19.2191	55.8081	ABCC9
Neuron Projection (GO:0043005)	5/557	0.058011	0.189922	2.50686	7.13733	PRKN;GABRB2;GNA12;HTR3A;STRN3
Vesicle (GO:0031982)	3/235	0.0583984	0.189922	3.53682	10.0462	CBR1;PEG10;RHOA
Cytoplasmic Vesicle Membrane (GO:0030659)	4/389	0.0583989	0.189922	2.85934	8.12183	RAB1A;ORMDL3;RFFL;RHOA
Proton-Transporting ATP Synthase Complex (GO:0045259)	1/18	0.0654175	0.189922	15.8251	43.1545	ATP5MF
GABA-A Receptor Complex (GO:1902711)	1/18	0.0654175	0.189922	15.8251	43.1545	GABRB2
Sodium Channel Complex (GO:0034706)	1/18	0.0654175	0.189922	15.8251	43.1545	SCN3B
Mitochondrial Proton-Transporting ATP Synthase Complex (GO:0005753)	1/18	0.0654175	0.189922	15.8251	43.1545	ATP5MF
Cilium (GO:0005929)	3/257	0.0722155	0.203106	3.22687	8.48054	CFAP221;KIF19;CFAP70
Ficolin-1-Rich Granule Lumen (GO:1904813)	2/123	0.0779051	0.212468	4.48409	11.4446	PSMD12;PGM1
Core Mediator Complex (GO:0070847)	1/23	0.0828273	0.215677	12.2254	30.4535	MED7
Peroxisome (GO:0005777)	2/129	0.0845222	0.215677	4.27095	10.5524	ACOX1;PLAAT3
Heterotrimeric G-protein Complex (GO:0005834)	1/24	0.0862706	0.215677	11.6933	28.6517	GNA12
Aggresome (GO:0016235)	1/35	0.123316	0.292724	7.9058	16.5469	PRKN
Tertiary Granule (GO:0070820)	2/162	0.123595	0.292724	3.38442	7.07597	PGM1;RHOA
Brush Border Membrane (GO:0031526)	1/40	0.139661	0.314237	6.89051	13.5642	GNA12
Cyclin-Dependent Protein Kinase Holoenzyme Complex (GO:0000307)	1/40	0.139661	0.314237	6.89051	13.5642	CCNC
Transcription Factor TFIID Complex (GO:0005669)	1/42	0.146114	0.320739	6.55372	12.6052	GTF2E2
Basement Membrane (GO:0005604)	1/46	0.158878	0.335599	5.96997	10.9825	ANG
Mitochondrial Inner Membrane (GO:0005743)	3/370	0.161813	0.335599	2.22048	4.0442	CHCHD3;CRLS1;ATP5MF
Microbody Lumen (GO:0031907)	1/49	0.168328	0.335599	5.596	9.9712	ACOX1
Peroxisomal Matrix (GO:0005782)	1/49	0.168328	0.335599	5.596	9.9712	ACOX1
Focal Adhesion (GO:0005925)	3/387	0.177414	0.335599	2.12033	3.66663	GNA12;CHP1;RHOA
Cation Channel Complex (GO:0034703)	1/53	0.180764	0.335599	5.1645	8.83421	HTR3A
Tertiary Granule Lumen (GO:1904724)	1/53	0.180764	0.335599	5.1645	8.83421	PGM1
Cell-Substrate Junction (GO:0030055)	3/395	0.184899	0.335599	2.07621	3.50453	GNA12;CHP1;RHOA
Organelle Inner Membrane (GO:0019866)	3/398	0.187728	0.335599	2.06013	3.4461	CHCHD3;CRLS1;ATP5MF
Bounding Membrane Of Organelle (GO:0098588)	5/819	0.193132	0.335599	1.67699	2.75761	RAB1A;ORMDL3;CHP1;RFFL;RHOA
Sperm Flagellum (GO:0036126)	1/60	0.202087	0.335599	4.55016	7.27596	CFAP70
Transport Vesicle Membrane (GO:0030658)	1/60	0.202087	0.335599	4.55016	7.27596	RAB1A
Ficolin-1-Rich Granule Membrane (GO:0101003)	1/60	0.202087	0.335599	4.55016	7.27596	RHOA
SCF Ubiquitin Ligase Complex (GO:0019005)	1/61	0.205089	0.335599	4.4741	7.08838	PRKN
Acrosomal Vesicle (GO:0001669)	1/64	0.214025	0.340464	4.2604	6.5681	CCDC62
Golgi Membrane (GO:0000139)	3/427	0.215627	0.340464	1.91637	2.94011	RAB1A;CHP1;RFFL
Nucleus (GO:0005634)	20/4487	0.22577	0.350333	1.25836	1.87274	PRKN;EGLN1;NAA50;CASZ1;DCUN1D4;CCNC;UBE2J2;C9ORF72;QKI;H2AC18;MED7;RAD54B;DPM1;MAGEA8;MRNIP;PSMB5;UBXN8;CHP1;ANG;CCDC62
Cytoplasmic Stress Granule (GO:0010494)	1/76	0.248792	0.379513	3.57658	4.97551	C9ORF72
Glutamatergic Synapse (GO:0098978)	1/78	0.254437	0.381656	3.48333	4.76764	RHOA
Potassium Channel Complex (GO:0034705)	1/81	0.262826	0.383382	3.3522	4.47941	ABCC9
Autophagosome (GO:0005776)	1/83	0.268367	0.383382	3.27011	4.30149	C9ORF72
P-body (GO:0000932)	1/83	0.268367	0.383382	3.27011	4.30149	C9ORF72
Secretory Granule Membrane (GO:0030667)	2/279	0.281385	0.391962	1.94333	2.4642	ORMDL3;RHOA
Intracellular Membrane-Bounded Organelle (GO:0043231)	22/5175	0.285227	0.391962	1.18994	1.49275	PRKN;EGLN1;NAA50;CYB5A;CASZ1;DCUN1D4;CCNC;ABHD5;UBE2J2;C9ORF72;QKI;H2AC18;MED7;RAD54B;DPM1;MAGEA8;MRNIP;PSMB5;UBXN8;CHP1;ANG;CCDC62
Specific Granule Membrane (GO:0035579)	1/90	0.287439	0.391962	3.01184	3.755	ORMDL3
Lysosome (GO:0005764)	3/503	0.292088	0.392357	1.61875	1.9922	PLAAT3;RFFL;C9ORF72
Golgi Lumen (GO:0005796)	1/100	0.313836	0.415371	2.70625	3.13623	MMP16
Cell Projection Membrane (GO:0031253)	1/105	0.326671	0.423269	2.57549	2.88147	GNA12
Apical Junction Complex (GO:0043296)	1/106	0.329209	0.423269	2.55084	2.83414	RHOA
Cytoplasmic Vesicle Lumen (GO:0060205)	1/115	0.351633	0.445732	2.34839	2.45446	PSMD12
Microtubule Cytoskeleton (GO:0015630)	2/342	0.368006	0.460007	1.57816	1.57762	KIF19;CHP1
Cytoplasmic Side Of Plasma Membrane (GO:0009898)	1/124	0.373317	0.460254	2.17557	2.14364	RHOA
Mitochondrial Envelope (GO:0005740)	1/146	0.423356	0.514892	1.84343	1.58451	TOMM70
Specific Granule (GO:0042581)	1/159	0.451049	0.541259	1.69064	1.34605	ORMDL3
Intracellular Non-Membrane-Bounded Organelle (GO:0043232)	5/1195	0.467294	0.553375	1.12455	0.855553	NAA50;UBXN8;ACSL4;ANG;ABHD5
cullin-RING Ubiquitin Ligase Complex (GO:0031461)	1/174	0.481375	0.562646	1.54288	1.12802	PRKN
Microtubule (GO:0005874)	1/185	0.502558	0.579874	1.44984	0.997554	KIF19
Nucleolus (GO:0005730)	3/771	0.556456	0.633938	1.03933	0.609223	NAA50;UBXN8;ANG
Nuclear Lumen (GO:0031981)	3/780	0.564416	0.634968	1.02681	0.5873	NAA50;UBXN8;ANG
Nuclear Membrane (GO:0031965)	1/227	0.575869	0.639854	1.17789	0.650047	ATP5MF
trans-Golgi Network (GO:0005802)	1/241	0.597851	0.656178	1.10839	0.57017	ATP9B
Polymeric Cytoskeletal Fiber (GO:0099513)	1/265	0.63295	0.685578	1.0064	0.46029	KIF19
Dendrite (GO:0030425)	1/270	0.639873	0.685578	0.987441	0.440879	STRN3
Cytoskeleton (GO:0005856)	2/599	0.66161	0.700528	0.886992	0.366398	CHP1;ANG
Cell-Cell Junction (GO:0005911)	1/299	0.677555	0.70907	0.890033	0.346458	RHOA
Secretory Granule Lumen (GO:0034774)	1/316	0.697808	0.72187	0.84127	0.302699	PSMD12
Actin Cytoskeleton (GO:0015629)	1/327	0.710238	0.726379	0.812427	0.277977	ANG
Endosome Membrane (GO:0010008)	1/361	0.745555	0.753932	0.734422	0.215646	RFFL
Collagen-Containing Extracellular Matrix (GO:0062023)	1/373	0.756976	0.756976	0.710295	0.197763	ANG

## Sheet: GO Molecular Function
Term	Overlap	P-value	Adjusted p-value	Odds Ratio	Combined Score	Genes
Sodium Channel Inhibitor Activity (GO:0019871)	2/7	0.000287854	0.0391481	109.151	889.912	NEDD4L;SCN3B
Lysophosphatidic Acid Acyltransferase Activity (GO:0042171)	2/20	0.00252346	0.14806	30.2998	181.257	ABHD5;CRLS1
Protein Phosphatase 2A Binding (GO:0051721)	2/23	0.00333585	0.14806	25.9674	148.093	GNA12;STRN3
Ubiquitin Conjugating Enzyme Binding (GO:0031624)	2/28	0.00492403	0.14806	20.9684	111.418	PRKN;DCUN1D4
Ubiquitin-Like Protein Conjugating Enzyme Binding (GO:0044390)	2/34	0.00720265	0.14806	17.0317	84.0225	PRKN;DCUN1D4
Sodium Channel Regulator Activity (GO:0017080)	2/34	0.00720265	0.14806	17.0317	84.0225	NEDD4L;SCN3B
Ion Channel Inhibitor Activity (GO:0008200)	2/35	0.00762074	0.14806	16.5147	80.5404	NEDD4L;SCN3B
Transmitter-Gated Monoatomic Ion Channel Activity (GO:0022824)	2/40	0.0098704	0.167797	14.3381	66.2166	GABRB2;HTR3A
Potassium Channel Regulator Activity (GO:0015459)	2/45	0.0123778	0.187042	12.6677	55.6348	NEDD4L;CHP1
ATP-activated Inward Rectifier Potassium Channel Activity (GO:0015272)	1/5	0.0186116	0.201376	67.3007	268.124	ABCC9
arachidonate-CoA Ligase Activity (GO:0047676)	1/5	0.0186116	0.201376	67.3007	268.124	ACSL4
SH3 Domain Binding (GO:0017124)	2/59	0.0206844	0.201376	9.54963	37.037	PRKN;GPX1
acyl-CoA Oxidase Activity (GO:0003997)	1/6	0.0222927	0.201376	53.8378	204.772	ACOX1
Dopamine Receptor Binding (GO:0050780)	1/6	0.0222927	0.201376	53.8378	204.772	GNA12
acetyl-CoA C-acyltransferase Activity (GO:0003988)	1/6	0.0222927	0.201376	53.8378	204.772	ACAT1
Peptide alpha-N-acetyltransferase Activity (GO:0004596)	1/7	0.0259602	0.201376	44.8626	163.802	NAA50
Armadillo Repeat Domain Binding (GO:0070016)	1/7	0.0259602	0.201376	44.8626	163.802	STRN3
Activin Receptor Activity (GO:0017002)	1/8	0.0296141	0.201376	38.4517	135.331	ACVR1C
Peptide N-acetyltransferase Activity (GO:0034212)	1/8	0.0296141	0.201376	38.4517	135.331	NAA50
Lysophospholipid Acyltransferase Activity (GO:0071617)	1/8	0.0296141	0.201376	38.4517	135.331	ABHD5
Intramolecular Transferase Activity, Phosphotransferases (GO:0016868)	1/9	0.0332545	0.205573	33.6436	114.508	PGM1
Prostaglandin Receptor Activity (GO:0004955)	1/9	0.0332545	0.205573	33.6436	114.508	PTGER3
Ubiquitin Binding (GO:0043130)	2/80	0.0363302	0.214822	6.9712	23.1103	PRKN;UBXN8
C-acyltransferase Activity (GO:0016408)	1/11	0.0404949	0.222108	26.9122	86.296	ACAT1
GABA-gated Chloride Ion Channel Activity (GO:0022851)	1/12	0.044095	0.222108	24.4644	76.3633	GABRB2
Intramolecular Oxidoreductase Activity, Transposing C=C Bonds (GO:0016863)	1/12	0.044095	0.222108	24.4644	76.3633	DDT
Cytochrome-C Oxidase Activity (GO:0004129)	1/12	0.044095	0.222108	24.4644	76.3633	CYB5A
Phospholipase A1 Activity (GO:0008970)	1/14	0.0512553	0.229888	20.6985	61.494	PLAAT3
Histone Deacetylase Binding (GO:0042826)	2/99	0.0533078	0.229888	5.60034	16.4184	PRKN;MAGEA8
Oxidoreductase Activity, Acting On NAD(P)H, Quinone Or Similar Compound As Acceptor (GO:0016655)	1/15	0.0548156	0.229888	19.2191	55.8081	CBR1
Phospholipase Binding (GO:0043274)	1/15	0.0548156	0.229888	19.2191	55.8081	PRKN
Carboxylic Ester Hydrolase Activity (GO:0052689)	2/104	0.058164	0.229888	5.32447	15.1454	PLAAT3;ABHD5
GABA-A Receptor Activity (GO:0004890)	1/18	0.0654175	0.229888	15.8251	43.1545	GABRB2
Ligand-Gated Monoatomic Anion Channel Activity (GO:0099095)	1/18	0.0654175	0.229888	15.8251	43.1545	GABRB2
1-Acylglycerol-3-Phosphate O-acyltransferase Activity (GO:0003841)	1/19	0.0689254	0.229888	14.9452	39.9744	CRLS1
Voltage-Gated Sodium Channel Activity (GO:0005248)	1/19	0.0689254	0.229888	14.9452	39.9744	SCN3B
Metalloaminopeptidase Activity (GO:0070006)	1/19	0.0689254	0.229888	14.9452	39.9744	MMP16
Ubiquitin-Protein Transferase Activity (GO:0004842)	4/412	0.0690639	0.229888	2.69497	7.20292	PRKN;NEDD4L;UBE2J2;RFFL
Protein Phosphatase Binding (GO:0019903)	2/115	0.0693575	0.229888	4.80349	12.818	GNA12;STRN3
Histone H4 Acetyltransferase Activity (GO:0010485)	1/20	0.0724202	0.229888	14.1579	37.1683	NAA50
Ubiquitin-Specific Protease Binding (GO:1990381)	1/20	0.0724202	0.229888	14.1579	37.1683	PRKN
Triglyceride Lipase Activity (GO:0004806)	1/21	0.0759021	0.229888	13.4493	34.6765	ABHD5
GABA Receptor Activity (GO:0016917)	1/21	0.0759021	0.229888	13.4493	34.6765	GABRB2
GTPase Activity (GO:0003924)	3/265	0.0775734	0.229888	3.12707	7.99444	RAB1A;GNA12;RHOA
Protease Binding (GO:0002020)	2/125	0.0800918	0.229888	4.41074	11.1353	PRKN;RFFL
Ribonucleoside Triphosphate Phosphatase Activity (GO:0017111)	3/270	0.0810092	0.229888	3.06773	7.70979	RAB1A;GNA12;RHOA
Ubiquitin Protein Ligase Binding (GO:0031625)	3/271	0.0817042	0.229888	3.05613	7.65452	PRKN;UBE2J2;RFFL
N-acetyltransferase Activity (GO:0008080)	1/23	0.0828273	0.229888	12.2254	30.4535	NAA50
Mannosyltransferase Activity (GO:0000030)	1/23	0.0828273	0.229888	12.2254	30.4535	DPM1
Active Monoatomic Ion Transmembrane Transporter Activity (GO:0022853)	1/24	0.0862706	0.230304	11.6933	28.6517	CYB5A
Oxidoreductase Activity, Acting On Paired Donors, With Incorporation Or Reduction Of Molecular Oxygen, Reduced Flavin Or Flavoprotein As One Donor, And Incorporation Of One Atom Of Oxygen (GO:0016712)	1/25	0.0897012	0.230304	11.2055	27.0195	CYP4F3
Ferrous Iron Binding (GO:0008198)	1/25	0.0897012	0.230304	11.2055	27.0195	EGLN1
Inward Rectifier Potassium Channel Activity (GO:0005242)	1/26	0.0931191	0.230304	10.7568	25.5352	ABCC9
Serotonin Receptor Activity (GO:0099589)	1/26	0.0931191	0.230304	10.7568	25.5352	HTR3A
Ubiquitin-Like Protein Ligase Binding (GO:0044389)	3/289	0.0946525	0.230304	2.86116	6.74531	PRKN;UBE2J2;RFFL
Histone Acetyltransferase Activity (GO:0004402)	1/27	0.0965243	0.230304	10.3425	24.1804	NAA50
Carboxy-Lyase Activity (GO:0016831)	1/27	0.0965243	0.230304	10.3425	24.1804	DDT
Acylglycerol O-acyltransferase Activity (GO:0016411)	1/29	0.103297	0.238108	9.6028	21.7998	CRLS1
Aminopeptidase Activity (GO:0004177)	1/29	0.103297	0.238108	9.6028	21.7998	MMP16
Phospholipase A2 Activity (GO:0004623)	1/31	0.11002	0.240794	8.96171	19.7794	PLAAT3
Potassium Ion Transmembrane Transporter Activity (GO:0015079)	1/31	0.11002	0.240794	8.96171	19.7794	ABCC9
O-acyltransferase Activity (GO:0008374)	1/31	0.11002	0.240794	8.96171	19.7794	CRLS1
Ubiquitin Protein Ligase Activity (GO:0061630)	3/311	0.111544	0.240794	2.65381	5.8207	PRKN;NEDD4L;RFFL
Ubiquitin Conjugating Enzyme Activity (GO:0061631)	1/32	0.113362	0.240796	8.67219	18.8808	UBE2J2
Ubiquitin-Like Protein Ligase Activity (GO:0061659)	3/319	0.117958	0.240796	2.58557	5.52648	PRKN;NEDD4L;RFFL
Hsp70 Protein Binding (GO:0030544)	1/34	0.12001	0.240796	8.14578	17.2705	PRKN
Nuclear Estrogen Receptor Binding (GO:0030331)	1/34	0.12001	0.240796	8.14578	17.2705	CCDC62
Tubulin Binding (GO:0015631)	3/322	0.120398	0.240796	2.56087	5.42123	PRKN;KIF19;CHP1
Ubiquitin-Like Protein Conjugating Enzyme Activity (GO:0061650)	1/35	0.123316	0.243057	7.9058	16.5469	UBE2J2
N-acyltransferase Activity (GO:0016410)	1/37	0.12989	0.252358	7.46584	15.2383	PLAAT3
Metal Ion Binding (GO:0046872)	4/521	0.131815	0.252491	2.11491	4.28556	DPM1;ACVR1C;CHP1;PGM1
2-Oxoglutarate-Dependent Dioxygenase Activity (GO:0016706)	1/41	0.142894	0.262615	6.71791	13.0707	EGLN1
RNA Endonuclease Activity (GO:0004521)	1/41	0.142894	0.262615	6.71791	13.0707	ANG
Signal Sequence Binding (GO:0005048)	1/41	0.142894	0.262615	6.71791	13.0707	TOMM70
Lipase Activity (GO:0016298)	1/42	0.146114	0.264954	6.55372	12.6052	ABHD5
Actin Binding (GO:0003779)	2/183	0.150326	0.269004	2.98857	5.6632	PRKN;ANG
Copper Ion Binding (GO:0005507)	1/45	0.155705	0.270093	6.10596	11.3558	ANG
Proton Transmembrane Transporter Activity (GO:0015078)	1/45	0.155705	0.270093	6.10596	11.3558	CYB5A
Cyclin-Dependent Protein Serine/Threonine Kinase Regulator Activity (GO:0016538)	1/46	0.158878	0.270093	5.96997	10.9825	CCNC
rRNA Binding (GO:0019843)	1/46	0.158878	0.270093	5.96997	10.9825	MTERF4
Pyrophosphatase Activity (GO:0016462)	1/49	0.168328	0.280937	5.596	9.9712	PPA2
Small GTPase Binding (GO:0031267)	2/199	0.1714	0.280937	2.74362	4.83908	C9ORF72;STRN3
Nuclear Receptor Coactivator Activity (GO:0030374)	1/50	0.171454	0.280937	5.48152	9.66634	CCDC62
Guanyl-Nucleotide Exchange Factor Activity (GO:0005085)	2/203	0.176745	0.283649	2.68848	4.65925	DENND2B;C9ORF72
Monoatomic Anion Channel Activity (GO:0005253)	1/53	0.180764	0.283649	5.1645	8.83421	GABRB2
Oxidoreduction-Driven Active Transmembrane Transporter Activity (GO:0015453)	1/54	0.183844	0.283649	5.0668	8.58148	CYB5A
Myosin Binding (GO:0017022)	1/54	0.183844	0.283649	5.0668	8.58148	RHOA
Flavin Adenine Dinucleotide Binding (GO:0050660)	1/55	0.186913	0.283649	4.97272	8.33981	ACOX1
Chloride Transmembrane Transporter Activity (GO:0015108)	1/55	0.186913	0.283649	4.97272	8.33981	GABRB2
Amino Acid Transmembrane Transporter Activity (GO:0015171)	1/56	0.18997	0.283649	4.88206	8.10855	SLC38A8
Iron Ion Binding (GO:0005506)	1/56	0.18997	0.283649	4.88206	8.10855	EGLN1
Metalloexopeptidase Activity (GO:0008235)	1/57	0.193017	0.283649	4.79464	7.88709	MMP16
Endonuclease Activity (GO:0004519)	1/58	0.196051	0.283649	4.71029	7.67484	ANG
Nuclease Activity (GO:0004518)	1/58	0.196051	0.283649	4.71029	7.67484	ANG
Protein Phosphatase Regulator Activity (GO:0019888)	1/61	0.205089	0.291075	4.4741	7.08838	GNA12
GTPase Binding (GO:0051020)	2/225	0.206571	0.291075	2.42054	3.81747	C9ORF72;STRN3
PDZ Domain Binding (GO:0030165)	1/62	0.208079	0.291075	4.40053	6.90813	PRKN
L-amino Acid Transmembrane Transporter Activity (GO:0015179)	1/63	0.211058	0.291075	4.32934	6.73482	SLC38A8
Acyltransferase Activity, Transferring Groups Other Than Amino-Acyl Groups (GO:0016747)	1/64	0.214025	0.291075	4.2604	6.5681	PLAAT3
Chloride Channel Activity (GO:0005254)	1/64	0.214025	0.291075	4.2604	6.5681	GABRB2
Microtubule Binding (GO:0008017)	2/239	0.225831	0.30295	2.27594	3.38652	KIF19;CHP1
Ubiquitin-Like Protein Transferase Activity (GO:0019787)	2/240	0.227213	0.30295	2.26626	3.3583	PRKN;NEDD4L
RNA Nuclease Activity (GO:0004540)	1/70	0.231603	0.305806	3.88876	5.68821	ANG
Transition Metal Ion Binding (GO:0046914)	3/456	0.244358	0.318569	1.79102	2.52377	PRKN;MMP16;ANG
Ligand-Gated Monoatomic Cation Channel Activity (GO:0099094)	1/75	0.245954	0.318569	3.62509	5.0846	HTR3A
Kinase Binding (GO:0019900)	3/460	0.248372	0.318666	1.77498	2.47224	PRKN;CHP1;RFFL
Phospholipase Activity (GO:0004620)	1/77	0.25162	0.319816	3.52934	4.86991	PLAAT3
Potassium Channel Activity (GO:0005267)	1/79	0.257244	0.323937	3.4385	4.66855	ABCC9
RNA Binding (GO:0003723)	7/1411	0.277163	0.345349	1.35796	1.74246	PEG10;MTERF4;ANG;R3HDM1;GTF2E2;ZC3H15;QKI
Heme Binding (GO:0020037)	1/87	0.279326	0.345349	3.11738	3.97583	CYB5A
mRNA Binding (GO:0003729)	2/282	0.285557	0.349871	1.92221	2.40914	PEG10;QKI
Oxidoreductase Activity, Acting On The CH-OH Group Of Donors, NAD Or NADP As Acceptor (GO:0016616)	1/95	0.30076	0.365209	2.85092	3.42521	CBR1
Cytokine Receptor Binding (GO:0005126)	1/100	0.313836	0.377486	2.70625	3.13623	DDT
Metalloendopeptidase Activity (GO:0004222)	1/101	0.316422	0.377486	2.67905	3.08273	MMP16
Protein Kinase Regulator Activity (GO:0019887)	1/103	0.321565	0.380286	2.62626	2.97963	CCNC
Monoatomic Cation Channel Activity (GO:0005261)	1/105	0.326671	0.382993	2.57549	2.88147	ABCC9
Cadherin Binding (GO:0045296)	2/319	0.336706	0.391384	1.69465	1.84471	RAB1A;ZC3H15
Phosphatase Binding (GO:0019902)	1/112	0.344242	0.396753	2.41222	2.57242	CHCHD3
Nuclear Receptor Binding (GO:0016922)	1/115	0.351633	0.401866	2.34839	2.45446	CCDC62
Endopeptidase Activity (GO:0004175)	2/335	0.358533	0.406337	1.61191	1.6534	PSMB5;MMP16
Zinc Ion Binding (GO:0008270)	2/341	0.366655	0.412109	1.5829	1.58817	PRKN;MMP16
Metallopeptidase Activity (GO:0008237)	1/124	0.373317	0.416157	2.17557	2.14364	MMP16
G Protein-Coupled Receptor Binding (GO:0001664)	1/140	0.410114	0.453459	1.92359	1.71453	PRKN
Magnesium Ion Binding (GO:0000287)	1/155	0.442671	0.48551	1.73491	1.41383	PGM1
GTPase Regulator Activity (GO:0030695)	2/424	0.474232	0.515964	1.26618	0.944647	DENND2B;C9ORF72
GTP Binding (GO:0005525)	1/201	0.531853	0.574064	1.33277	0.841494	RHOA
Guanyl Ribonucleotide Binding (GO:0032561)	1/226	0.574254	0.610589	1.18318	0.656292	RHOA
Protein Kinase Binding (GO:0019901)	2/511	0.574672	0.610589	1.04508	0.578927	PRKN;RFFL
Protein Homodimerization Activity (GO:0042803)	2/662	0.714825	0.753614	0.799709	0.268477	ACOX1;ANG
Protein Serine/Threonine Kinase Activity (GO:0004674)	1/342	0.726378	0.754783	0.776096	0.248106	ACVR1C
Calcium Ion Binding (GO:0005509)	1/346	0.73053	0.754783	0.766941	0.240807	CHP1
DNA-binding Transcription Activator Activity, RNA Polymerase II-specific (GO:0001228)	1/348	0.732583	0.754783	0.762443	0.237256	CASZ1
DNA Binding (GO:0003677)	2/846	0.831895	0.842536	0.619392	0.113999	ANG;H2AC18
Transcription Cis-Regulatory Region Binding (GO:0000976)	1/474	0.835076	0.842536	0.55574	0.100162	CASZ1
Purine Ribonucleoside Triphosphate Binding (GO:0035639)	1/476	0.836341	0.842536	0.553343	0.098893	RHOA
RNA Polymerase II Transcription Regulatory Region Sequence-Specific DNA Binding (GO:0000977)	1/1225	0.991342	0.991342	0.206467	0.00179539	CASZ1
