# Supplementary material for: Transcriptome of Subcutaneous Adipose Tissue reflect Membrane Dysfunction and Impaired Oxidative Processes in T2D across Heterogenous Populations
Source: Research Square preprint supplement (doi:10.21203/rs.3.rs-7053974/v1), 2025-11-14
Supplement: Supplementary file 12 [file ef58014659f578750f78d453.xlsx]

## Sheet: Gene names and Protein names
Gene symbols	Association ID	Ensemble ID	Protein names
A4GNT	11735810_at	ENSG00000118017	alpha-1,4-N-acetylglucosaminyltransferase
ABCA4	11752075_a_at	ENSG00000198691	ATP binding cassette subfamily A member 4
ABCC9	11758382_s_at	ENSG00000069431	ATP binding cassette subfamily C member 9
ABCF2	11722025_x_at	ENSG00000033050	ATP binding cassette subfamily F member 2
ABHD12B	11738559_a_at	ENSG00000131969	abhydrolase domain containing 12B
ABHD5	11723706_at	ENSG00000011198	abhydrolase domain containing 5, lysophosphatidic acid acyltransferase
ACAT1	11742973_at	ENSG00000075239	acetyl-CoA acetyltransferase 1
ACO1	11743758_a_at	ENSG00000122729	aconitase 1
ACO1	11755357_s_at	ENSG00000122729	aconitase 1
ACOT8	11762204_a_at	ENSG00000101473	acyl-CoA thioesterase 8
ACOX1	11726322_at	ENSG00000161533	acyl-CoA oxidase 1
ACOX1	11726323_a_at	ENSG00000161533	acyl-CoA oxidase 1
ACSL1	11716302_s_at	ENSG00000151726	acyl-CoA synthetase long chain family member 1
ACSL4	11719042_s_at	ENSG00000068366	acyl-CoA synthetase long chain family member 4
ACSS3	11730932_at	ENSG00000111058	acyl-CoA synthetase short chain family member 3
ACSS3	11759049_at	ENSG00000111058	acyl-CoA synthetase short chain family member 3
ACVR1C	11733619_a_at	ENSG00000123612	activin A receptor type 1C
ADAL	11732005_at	ENSG00000168803	adenosine deaminase like
ADAL	11732006_s_at	ENSG00000168803	adenosine deaminase like
ADAM18	11752308_a_at	ENSG00000168619	ADAM metallopeptidase domain 18
ADAT3	11744023_at	ENSG00000213638	adenosine deaminase tRNA specific 3
ADD2	11727337_a_at	ENSG00000075340	adducin 2
ADGRE2	11752836_a_at	ENSG00000127507	adhesion G protein-coupled receptor E2
ADGRL1	11721891_at	ENSG00000072071	adhesion G protein-coupled receptor L1
ADGRL2	11745273_a_at	ENSG00000117114	adhesion G protein-coupled receptor L2
ADGRV1	11728953_a_at	ENSG00000164199	adhesion G protein-coupled receptor V1
ADPRHL1	11743885_s_at	ENSG00000153531	ADP-ribosylhydrolase like 1
AFG2A	11747834_a_at	ENSG00000145375	AFG2 AAA ATPase homolog A
AGTR2	11733391_at	ENSG00000180772	angiotensin II receptor type 2
AHRR	11729561_a_at	ENSG00000063438	aryl hydrocarbon receptor repressor
AK6	11719493_s_at	ENSG00000085231	adenylate kinase 6
AKAP6	11758244_s_at	ENSG00000151320	A-kinase anchoring protein 6
AKR1E2	11734384_a_at	ENSG00000165568	aldo-keto reductase family 1 member E2
AKTIP	11760648_at	ENSG00000166971	AKT interacting protein
ALDH1B1	11746588_a_at	ENSG00000137124	aldehyde dehydrogenase 1 family member B1
ALDH3A1	11726360_a_at	ENSG00000108602	aldehyde dehydrogenase 3 family member A1
ALG10	11727294_s_at	ENSG00000139133	ALG10 alpha-1,2-glucosyltransferase
ALG10B	11727294_s_at	ENSG00000175548	ALG10 alpha-1,2-glucosyltransferase B
ALKBH1	11725834_at	ENSG00000100601	alkB homolog 1, histone H2A dioxygenase
ALPI	11749765_a_at	ENSG00000163295	alkaline phosphatase, intestinal
ALX3	11735817_at	ENSG00000156150	ALX homeobox 3
AMD1	11717237_s_at	ENSG00000123505	adenosylmethionine decarboxylase 1
AMER2	11759326_at	ENSG00000165566	APC membrane recruitment protein 2
ANAPC10	11735774_a_at	ENSG00000164162	anaphase promoting complex subunit 10
ANAPC13	11716625_a_at	ENSG00000129055	anaphase promoting complex subunit 13
ANG	11718988_s_at	ENSG00000214274	angiogenin
ANKS6	11725287_a_at	ENSG00000165138	ankyrin repeat and sterile alpha motif domain containing 6
AP1AR	11743438_s_at	ENSG00000138660	adaptor related protein complex 1 associated regulatory protein
AP1G1	11745997_a_at	ENSG00000166747	adaptor related protein complex 1 subunit gamma 1
APOB	11724530_a_at	ENSG00000084674	apolipoprotein B
ARG2	11757776_s_at	ENSG00000081181	arginase 2
ARHGAP29	11723814_s_at	ENSG00000137962	Rho GTPase activating protein 29
ARHGAP39	11721595_a_at	ENSG00000147799	Rho GTPase activating protein 39
ARHGEF19	11744237_a_at	ENSG00000142632	Rho guanine nucleotide exchange factor 19
ARHGEF4	11752534_x_at	ENSG00000136002	Rho guanine nucleotide exchange factor 4
ARIH2OS	11740715_at	ENSG00000221883	ARIH2 opposite strand lncRNA
ARL17A	11739780_s_at	ENSG00000185829	ADP ribosylation factor like GTPase 17A
ARL17B	11739780_s_at	ENSG00000228696	ADP ribosylation factor like GTPase 17B
ARMC10	11744690_a_at	ENSG00000170632	armadillo repeat containing 10
ARMC10	11744691_x_at	ENSG00000170632	armadillo repeat containing 10
ARMC10P1	11744690_a_at	ENSG00000178660	armadillo repeat containing 10 pseudogene 1
ARMC10P1	11744691_x_at	ENSG00000178660	armadillo repeat containing 10 pseudogene 1
ASPG	11740552_at	ENSG00000166183	asparaginase
ASPM	11748713_a_at	ENSG00000066279	assembly factor for spindle microtubules
ASRGL1	11761285_a_at	ENSG00000162174	asparaginase and isoaspartyl peptidase 1
ASS1	11757278_x_at	ENSG00000130707	argininosuccinate synthase 1
ASS1	11758627_s_at	ENSG00000130707	argininosuccinate synthase 1
ASS1P1	11758627_s_at	ENSG00000220517	argininosuccinate synthetase 1 pseudogene 1
ASS1P13	11758627_s_at	ENSG00000255353	argininosuccinate synthetase 1 pseudogene 13
ASS1P7	11758627_s_at	ENSG00000236893	argininosuccinate synthetase 1 pseudogene 7
ASS1P9	11758627_s_at	ENSG00000217791	argininosuccinate synthetase 1 pseudogene 9
ASXL1	11759778_at	ENSG00000171456	ASXL transcriptional regulator 1
ATAD3B	11721768_x_at	ENSG00000160072	ATPase family AAA domain containing 3B
ATAD5	11736919_at	ENSG00000176208	ATPase family AAA domain containing 5
ATG101	11726275_a_at	ENSG00000123395	autophagy related 101
ATG3	11716100_a_at	ENSG00000144848	autophagy related 3
ATG3	11716102_x_at	ENSG00000144848	autophagy related 3
ATG3	11753924_a_at	ENSG00000144848	autophagy related 3
ATG3	11753925_x_at	ENSG00000144848	autophagy related 3
ATG5	11745992_a_at	ENSG00000057663	autophagy related 5
ATP13A2	11737163_a_at	ENSG00000159363	ATPase cation transporting 13A2
ATP1A3	11729577_a_at	ENSG00000105409	ATPase Na+/K+ transporting subunit alpha 3
ATP1B3	11744259_a_at	ENSG00000069849	ATPase Na+/K+ transporting subunit beta 3
ATP2C1	11725747_a_at	ENSG00000017260	ATPase secretory pathway Ca2+ transporting 1
ATP5MF	11725612_x_at	ENSG00000241468	ATP synthase membrane subunit f
ATP5MF	11743715_x_at	ENSG00000241468	ATP synthase membrane subunit f
ATP5MF	11753755_x_at	ENSG00000241468	ATP synthase membrane subunit f
ATP5MG	11757636_x_at	ENSG00000167283	ATP synthase membrane subunit g
ATP5MK	11744384_x_at	ENSG00000173915	ATP synthase membrane subunit k
ATP5PD	11715874_s_at	ENSG00000167863	ATP synthase peripheral stalk subunit d
ATP6V1G2	11755721_a_at	ENSG00000213760	ATPase H+ transporting V1 subunit G2
ATP9B	11745239_a_at	ENSG00000166377	ATPase phospholipid transporting 9B (putative)
ATRNL1	11747099_a_at	ENSG00000107518	attractin like 1
AVEN	11722691_at	ENSG00000169857	apoptosis and caspase activation inhibitor
AVPI1	11717678_at	ENSG00000119986	arginine vasopressin induced 1
AZI2	11722010_a_at	ENSG00000163512	5-azacytidine induced 2
AZIN2	11748880_a_at	ENSG00000142920	antizyme inhibitor 2
B9D1	11746488_a_at	ENSG00000108641	B9 domain containing 1
BAIAP2L2	11727348_a_at	ENSG00000128298	BAR/IMD domain containing adaptor protein 2 like 2
BAIAP3	11747273_a_at	ENSG00000007516	BAI1 associated protein 3
BBS1	11762231_x_at	ENSG00000174483	Bardet-Biedl syndrome 1
BCAP29	11722588_a_at	ENSG00000075790	B cell receptor associated protein 29
BCL2L13	11756765_x_at	ENSG00000099968	BCL2 like 13
BMAL1	11755151_a_at	ENSG00000133794	basic helix-loop-helix ARNT like 1
BNIP1	11718187_a_at	ENSG00000113734	BCL2 interacting protein 1
BNIP3	11743084_s_at	ENSG00000176171	BCL2 interacting protein 3
BNIP3L	11757303_s_at	ENSG00000104765	BCL2 interacting protein 3 like
BNIP3P1	11743084_s_at	ENSG00000197358	BCL2 interacting protein 3 pseudogene 1
BOLA2-SMG1P6	11745197_s_at	ENSG00000261740	BOLA2-SMG1P6 readthrough
BORCS8	11722745_a_at	ENSG00000254901	BLOC-1 related complex subunit 8
BORCS8-MEF2B	11722745_a_at	ENSG00000064489	BORCS8-MEF2B readthrough
BRWD1	11717856_a_at	ENSG00000185658	bromodomain and WD repeat domain containing 1
BSPH1	11738947_at	ENSG00000188334	binder of sperm protein homolog 1
BTBD6	11719007_s_at	ENSG00000184887	BTB domain containing 6
BTF3L4	11723420_s_at	ENSG00000134717	basic transcription factor 3 like 4
BTF3L4	11723421_x_at	ENSG00000134717	basic transcription factor 3 like 4
BTF3L4P1	11723420_s_at	ENSG00000232260	basic transcription factor 3 like 4 pseudogene 1
BTF3L4P2	11723420_s_at	ENSG00000213189	basic transcription factor 3 like 4 pseudogene 2
BZW2	11718405_a_at	ENSG00000136261	basic leucine zipper and W2 domains 2
BZW2	11751170_a_at	ENSG00000136261	basic leucine zipper and W2 domains 2
C11orf54	11724320_x_at	ENSG00000182919	chromosome 11 open reading frame 54
C11orf54	11724321_s_at	ENSG00000182919	chromosome 11 open reading frame 54
C11orf54	11747433_a_at	ENSG00000182919	chromosome 11 open reading frame 54
C11orf58	11723640_s_at	ENSG00000110696	chromosome 11 open reading frame 58
C12orf56	11735608_s_at	ENSG00000185306	chromosome 12 open reading frame 56
C15orf61	11734033_at	ENSG00000189227	chromosome 15 open reading frame 61
C18orf32	11742875_at	ENSG00000177576	chromosome 18 open reading frame 32
C1QTNF5	11735345_at	ENSG00000223953	C1q and TNF related 5
C20orf202	11732743_at	ENSG00000215595	chromosome 20 open reading frame 202
C21orf58	11760816_at	ENSG00000160298	chromosome 21 open reading frame 58
C2orf69	11729697_at	ENSG00000178074	chromosome 2 open reading frame 69
C3orf52	11760694_at	ENSG00000114529	chromosome 3 open reading frame 52
C5orf63	11764000_at	ENSG00000164241	chromosome 5 open reading frame 63
C8A	11743199_at	ENSG00000157131	complement C8 alpha chain
C9orf72	11720531_at	ENSG00000147894	C9orf72-SMCR8 complex subunit
CABLES2	11743565_at	ENSG00000149679	Cdk5 and Abl enzyme substrate 2
CACNA1H	11725539_at	ENSG00000196557	calcium voltage-gated channel subunit alpha1 H
CACNB2	11731714_x_at	ENSG00000165995	calcium voltage-gated channel auxiliary subunit beta 2
CACNB3	11720902_a_at	ENSG00000167535	calcium voltage-gated channel auxiliary subunit beta 3
CALCRL	11730274_at	ENSG00000064989	calcitonin receptor like receptor
CALCRL	11761796_at	ENSG00000064989	calcitonin receptor like receptor
CAMK2A	11725935_at	ENSG00000070808	calcium/calmodulin dependent protein kinase II alpha
CAMTA1	11744401_a_at	ENSG00000171735	calmodulin binding transcription activator 1
CAMTA1	11759555_s_at	ENSG00000171735	calmodulin binding transcription activator 1
CAPN2	11741128_a_at	ENSG00000162909	calpain 2
CAPZA2	11723013_x_at	ENSG00000198898	capping actin protein of muscle Z-line subunit alpha 2
CAPZA2	11750192_x_at	ENSG00000198898	capping actin protein of muscle Z-line subunit alpha 2
CARD9	11728461_a_at	ENSG00000187796	caspase recruitment domain family member 9
CARD9	11728462_at	ENSG00000187796	caspase recruitment domain family member 9
CARMIL3	11742434_a_at	ENSG00000186648	capping protein regulator and myosin 1 linker 3
CASC2	11746833_a_at	ENSG00000177640	cancer susceptibility 2
CASKIN2	11723855_a_at	ENSG00000177303	CASK interacting protein 2
CASQ2	11723223_at	ENSG00000118729	calsequestrin 2
CASQ2	11751361_a_at	ENSG00000118729	calsequestrin 2
CASZ1	11728412_x_at	ENSG00000130940	castor zinc finger 1
CAV2	11725964_a_at	ENSG00000105971	caveolin 2
CAVIN2	11725695_s_at	ENSG00000168497	caveolae associated protein 2
CBR1	11753302_s_at	ENSG00000159228	carbonyl reductase 1
CBX2	11722710_at	ENSG00000173894	chromobox 2
CCDC50	11733156_a_at	ENSG00000152492	coiled-coil domain containing 50
CCDC50	11743324_a_at	ENSG00000152492	coiled-coil domain containing 50
CCDC62	11731020_s_at	ENSG00000130783	coiled-coil domain containing 62
CCDC78	11749993_a_at	ENSG00000162004	coiled-coil domain containing 78
CCDC83	11733502_a_at	ENSG00000150676	coiled-coil domain containing 83
CCDC90B	11743940_x_at	ENSG00000137500	coiled-coil domain containing 90B
CCDC90B	11744695_a_at	ENSG00000137500	coiled-coil domain containing 90B
CCL4L2	11760063_x_at	ENSG00000276070	C-C motif chemokine ligand 4 like 2
CCNC	11726983_s_at	ENSG00000112237	cyclin C
CCNC	11726984_a_at	ENSG00000112237	cyclin C
CCNI2	11737683_at	ENSG00000205089	cyclin I family member 2
CCR3	11741322_a_at	ENSG00000183625	C-C motif chemokine receptor 3
CCT5	11762828_at	ENSG00000150753	chaperonin containing TCP1 subunit 5
CD36	11724875_a_at	ENSG00000135218	CD36 molecule
CDC73	11739387_at	ENSG00000134371	cell division cycle 73
CDCA2	11743511_a_at	ENSG00000184661	cell division cycle associated 2
CDCA8	11741015_a_at	ENSG00000134690	cell division cycle associated 8
CDH16	11755216_a_at	ENSG00000166589	cadherin 16
CDH19	11731862_at	ENSG00000071991	cadherin 19
CDK3	11727290_a_at	ENSG00000250506	cyclin dependent kinase 3
CDK8	11763387_s_at	ENSG00000132964	cyclin dependent kinase 8
CDKN2A-DT	11744769_at	ENSG00000224854	CDKN2A divergent transcript
CDKN2C	11758661_s_at	ENSG00000123080	cyclin dependent kinase inhibitor 2C
CDYL2	11740179_at	ENSG00000166446	chromodomain Y like 2
CELF3	11732613_a_at	ENSG00000159409	CUGBP Elav-like family member 3
CENPP	11740053_a_at	ENSG00000188312	centromere protein P
CENPT	11747480_a_at	ENSG00000102901	centromere protein T
CEP250	11752316_a_at	ENSG00000126001	centrosomal protein 250
CEP44	11736844_s_at	ENSG00000164118	centrosomal protein 44
CEP76	11750056_x_at	ENSG00000101624	centrosomal protein 76
CERCAM	11750886_x_at	ENSG00000167123	cerebral endothelial cell adhesion molecule
CFAP100	11731956_at	ENSG00000163885	cilia and flagella associated protein 100
CFAP157	11742474_a_at	ENSG00000160401	cilia and flagella associated protein 157
CFAP221	11732658_a_at	ENSG00000163075	cilia and flagella associated protein 221
CFAP298-TCP10L	11724592_at	ENSG00000265590	CFAP298-TCP10L readthrough
CFAP410	11759681_x_at	ENSG00000160226	cilia and flagella associated protein 410
CFAP52	11734176_a_at	ENSG00000166596	cilia and flagella associated protein 52
CFAP70	11720171_s_at	ENSG00000156042	cilia and flagella associated protein 70
CFAP90	11743595_at	ENSG00000215217	cilia and flagella associated protein 90
CFAP97	11760478_at	ENSG00000164323	cilia and flagella associated protein 97
CFL2	11718119_s_at	ENSG00000165410	cofilin 2
CFL2	11737095_a_at	ENSG00000165410	cofilin 2
CGRRF1	11758806_at	ENSG00000100532	cell growth regulator with ring finger domain 1
CHCHD1	11724564_a_at	ENSG00000172586	coiled-coil-helix-coiled-coil-helix domain containing 1
CHCHD3	11757083_s_at	ENSG00000106554	coiled-coil-helix-coiled-coil-helix domain containing 3
CHCHD3	11760429_at	ENSG00000106554	coiled-coil-helix-coiled-coil-helix domain containing 3
CHCHD3P3	11757083_s_at	ENSG00000214973	coiled-coil-helix-coiled-coil-helix domain containing 3 pseudogene 3
CHD7	11723354_s_at	ENSG00000171316	chromodomain helicase DNA binding protein 7
CHN2	11753540_a_at	ENSG00000106069	chimerin 2
CHORDC1	11742059_a_at	ENSG00000110172	cysteine and histidine rich domain containing 1
CHORDC1	11742060_x_at	ENSG00000110172	cysteine and histidine rich domain containing 1
CHORDC1	11743054_a_at	ENSG00000110172	cysteine and histidine rich domain containing 1
CHP1	11754517_a_at	ENSG00000187446	calcineurin like EF-hand protein 1
CHPT1	11722070_a_at	ENSG00000111666	choline phosphotransferase 1
CHPT1	11754623_x_at	ENSG00000111666	choline phosphotransferase 1
CHRFAM7A	11750964_s_at	ENSG00000166664	CHRNA7 (exons 5-10) and FAM7A (exons A-E) fusion
CHRM5	11734327_a_at	ENSG00000184984	cholinergic receptor muscarinic 5
CHRM5	11747024_a_at	ENSG00000184984	cholinergic receptor muscarinic 5
CHRNA10	11732891_a_at	ENSG00000129749	cholinergic receptor nicotinic alpha 10 subunit
CHRNA7	11750964_s_at	ENSG00000175344	cholinergic receptor nicotinic alpha 7 subunit
CHRNB4	11736940_at	ENSG00000117971	cholinergic receptor nicotinic beta 4 subunit
CIAO3	11734545_a_at	ENSG00000103245	cytosolic iron-sulfur assembly component 3
CIAO3	11746078_x_at	ENSG00000103245	cytosolic iron-sulfur assembly component 3
CIBAR1	11739364_s_at	ENSG00000188343	CBY1 interacting BAR domain containing 1
CIBAR1	11739365_x_at	ENSG00000188343	CBY1 interacting BAR domain containing 1
CIBAR1	11750301_x_at	ENSG00000188343	CBY1 interacting BAR domain containing 1
CIBAR1P1	11739364_s_at	ENSG00000157021	CIBAR1 pseudogene 1
CIBAR1P1	11739365_x_at	ENSG00000157021	CIBAR1 pseudogene 1
CIBAR1P1	11750301_x_at	ENSG00000157021	CIBAR1 pseudogene 1
CIMAP3	11746250_a_at	ENSG00000173947	ciliary microtubule associated protein 3
CISD1	11727820_a_at	ENSG00000122873	CDGSH iron sulfur domain 1
CKAP2	11723678_at	ENSG00000136108	cytoskeleton associated protein 2
CKS1B	11716092_x_at	ENSG00000173207	CDC28 protein kinase regulatory subunit 1B
CKS1B	11758200_x_at	ENSG00000173207	CDC28 protein kinase regulatory subunit 1B
CKS1BP2	11716092_x_at	ENSG00000225976	CDC28 protein kinase regulatory subunit 1B pseudogene 2
CKS1BP2	11758200_x_at	ENSG00000225976	CDC28 protein kinase regulatory subunit 1B pseudogene 2
CKS1BP3	11716092_x_at	ENSG00000268942	CDC28 protein kinase regulatory subunit 1B pseudogene 3
CKS1BP3	11758200_x_at	ENSG00000268942	CDC28 protein kinase regulatory subunit 1B pseudogene 3
CKS1BP6	11716092_x_at	ENSG00000178556	CDC28 protein kinase regulatory subunit 1B pseudogene 6
CLCNKB	11747750_a_at	ENSG00000184908	chloride voltage-gated channel Kb
CLEC18A	11757562_s_at	ENSG00000157322	C-type lectin domain family 18 member A
CLEC18B	11757562_s_at	ENSG00000140839	C-type lectin domain family 18 member B
CLEC18C	11757562_s_at	ENSG00000157335	C-type lectin domain family 18 member C
CLRN2	11738384_at	ENSG00000249581	clarin 2
CMC1	11722476_x_at	ENSG00000187118	C-X9-C motif containing 1
CMC4	11717654_a_at	ENSG00000182712	C-X9-C motif containing 4
CMTM2	11729784_a_at	ENSG00000140932	CKLF like MARVEL transmembrane domain containing 2
CMTR2	11728310_a_at	ENSG00000180917	cap methyltransferase 2
CMTR2	11754232_a_at	ENSG00000180917	cap methyltransferase 2
CNIH4	11755746_s_at	ENSG00000143771	cornichon family AMPA receptor auxiliary protein 4
CNIH4	11758808_a_at	ENSG00000143771	cornichon family AMPA receptor auxiliary protein 4
CNOT9	11763183_at	ENSG00000144580	CCR4-NOT transcription complex subunit 9
CNTNAP3	11738181_s_at	ENSG00000106714	contactin associated protein family member 3
CNTNAP3B	11738181_s_at	ENSG00000154529	contactin associated protein family member 3B
CNTNAP3P2	11738181_s_at	ENSG00000276386	CNTNAP3 pseudogene 2
COA3	11761716_at	ENSG00000183978	cytochrome c oxidase assembly factor 3
COG8	11724303_a_at	ENSG00000213380	component of oligomeric golgi complex 8
COL24A1	11755302_a_at	ENSG00000171502	collagen type XXIV alpha 1 chain
COLEC10	11736982_at	ENSG00000184374	collectin subfamily member 10
COMMD5	11758052_s_at	ENSG00000170619	COMM domain containing 5
COPS4	11743308_s_at	ENSG00000138663	COP9 signalosome subunit 4
COPS5	11754844_x_at	ENSG00000121022	COP9 signalosome subunit 5
COPS9	11742163_a_at	ENSG00000172428	COP9 signalosome subunit 9
CORO2B	11720874_at	ENSG00000103647	coronin 2B
CORO7-PAM16	11757649_a_at	ENSG00000103426	CORO7-PAM16 readthrough
COX20	11744549_s_at	ENSG00000203667	cytochrome c oxidase assembly factor COX20
COX20P1	11744549_s_at	ENSG00000213025	COX20 pseudogene 1
COX5A	11715656_at	ENSG00000178741	cytochrome c oxidase subunit 5A
COX6A1	11717095_s_at	ENSG00000111775	cytochrome c oxidase subunit 6A1
COX6A1P2	11717095_s_at	ENSG00000226976	COX6A1 pseudogene 2
COX6C	11717634_a_at	ENSG00000164919	cytochrome c oxidase subunit 6C
COX7A2	11753892_x_at	ENSG00000112695	cytochrome c oxidase subunit 7A2
COX7B	11715694_at	ENSG00000131174	cytochrome c oxidase subunit 7B
COX7B	11715695_x_at	ENSG00000131174	cytochrome c oxidase subunit 7B
CPEB2	11724950_a_at	ENSG00000137449	cytoplasmic polyadenylation element binding protein 2
CPO	11735952_at	ENSG00000144410	carboxypeptidase O
CRADD	11744422_s_at	ENSG00000169372	CASP2 and RIPK1 domain containing adaptor with death domain
CREB3L2	11718555_a_at	ENSG00000182158	cAMP responsive element binding protein 3 like 2
CRIPT	11730761_s_at	ENSG00000119878	CXXC repeat containing interactor of PDZ3 domain
CRLF2	11738480_a_at	ENSG00000205755	cytokine receptor like factor 2
CRLF2	11738480_a_at	ENSG00000292363	cytokine receptor like factor 2
CRLS1	11726335_a_at	ENSG00000088766	cardiolipin synthase 1
CRLS1	11726336_a_at	ENSG00000088766	cardiolipin synthase 1
CRNN	11751786_a_at	ENSG00000143536	cornulin
CT45A10	11734212_at	ENSG00000269586	cancer/testis antigen family 45 member A10
CTBP1-DT	11740391_x_at	ENSG00000196810	CTBP1 divergent transcript
CTBP2	11743316_x_at	ENSG00000175029	C-terminal binding protein 2
CTCFL	11750266_a_at	ENSG00000124092	CCCTC-binding factor like
CTCFL	11762409_x_at	ENSG00000124092	CCCTC-binding factor like
CTNNAL1	11745315_a_at	ENSG00000119326	catenin alpha like 1
CTPS1	11750141_a_at	ENSG00000171793	CTP synthase 1
CTR9	11716883_s_at	ENSG00000198730	CTR9 homolog, Paf1/RNA polymerase II complex component
CTSV	11748774_x_at	ENSG00000136943	cathepsin V
CTU2	11732310_a_at	ENSG00000174177	cytosolic thiouridylase subunit 2
CXCR2	11731423_at	ENSG00000180871	C-X-C motif chemokine receptor 2
CXCR2	11731424_x_at	ENSG00000180871	C-X-C motif chemokine receptor 2
CXCR5	11733116_a_at	ENSG00000160683	C-X-C motif chemokine receptor 5
CYB561D1	11735780_a_at	ENSG00000174151	cytochrome b561 family member D1
CYB5A	11753740_x_at	ENSG00000166347	cytochrome b5 type A
CYB5A	11754624_a_at	ENSG00000166347	cytochrome b5 type A
CYB5A	11757320_x_at	ENSG00000166347	cytochrome b5 type A
CYB5R4	11724238_at	ENSG00000065615	cytochrome b5 reductase 4
CYP2W1	11737840_x_at	ENSG00000073067	cytochrome P450 family 2 subfamily W member 1
CYP4A22	11760616_a_at	ENSG00000162365	cytochrome P450 family 4 subfamily A member 22
CYP4F3	11759103_at	ENSG00000186529	cytochrome P450 family 4 subfamily F member 3
CYSRT1	11734603_s_at	ENSG00000197191	cysteine rich tail 1
CAAP1	11728772_a_at	ENSG00000120159	caspase activity and apoptosis inhibitor 1
CAAP1	11746067_a_at	ENSG00000120159	caspase activity and apoptosis inhibitor 1
DAD1	11757687_x_at	ENSG00000129562	defender against cell death 1
DAND5	11737980_a_at	ENSG00000179284	DAN domain BMP antagonist family member 5
DAPL1	11724085_at	ENSG00000163331	death associated protein like 1
DBNDD1	11745813_a_at	ENSG00000003249	dysbindin domain containing 1
DCAF17	11728861_a_at	ENSG00000115827	DDB1 and CUL4 associated factor 17
DCUN1D4	11720951_a_at	ENSG00000109184	defective in cullin neddylation 1 domain containing 4
DDT	11760188_x_at	ENSG00000099977	D-dopachrome tautomerase
DDX55	11746829_x_at	ENSG00000111364	DEAD-box helicase 55
DECR1	11717060_a_at	ENSG00000104325	2,4-dienoyl-CoA reductase 1
DEF8	11721070_a_at	ENSG00000140995	differentially expressed in FDCP 8 homolog
DEFB126	11758715_s_at	ENSG00000125788	defensin beta 126
DENND1A	11755028_a_at	ENSG00000119522	DENN domain containing 1A
DENND2B	11749288_a_at	ENSG00000166444	DENN domain containing 2B
DERL1	11721636_a_at	ENSG00000136986	derlin 1
DERL1	11721637_s_at	ENSG00000136986	derlin 1
DERL2	11717553_at	ENSG00000072849	derlin 2
DESI1	11718607_x_at	ENSG00000100418	desumoylating isopeptidase 1
DHFR	11719000_x_at	ENSG00000228716	dihydrofolate reductase
DHFRP1	11719000_x_at	ENSG00000188985	dihydrofolate reductase pseudogene 1
DLG5	11745973_a_at	ENSG00000151208	discs large MAGUK scaffold protein 5
DMAP1	11762254_a_at	ENSG00000178028	DNA methyltransferase 1 associated protein 1
DMKN	11753205_a_at	ENSG00000161249	dermokine
DNAJB9	11757735_s_at	ENSG00000128590	DnaJ heat shock protein family (Hsp40) member B9
DNAJC25	11727646_a_at	ENSG00000059769	DnaJ heat shock protein family (Hsp40) member C25
DNAJC9	11759073_a_at	ENSG00000213551	DnaJ heat shock protein family (Hsp40) member C9
DNLZ	11728461_a_at	ENSG00000213221	DNL-type zinc finger
DNLZ	11728462_at	ENSG00000213221	DNL-type zinc finger
DPH3P1	11741893_at	ENSG00000233838	diphthamide biosynthesis 3 pseudogene 1
DPH3P1	11741894_x_at	ENSG00000233838	diphthamide biosynthesis 3 pseudogene 1
DPM1	11754523_a_at	ENSG00000000419	dolichyl-phosphate mannosyltransferase subunit 1, catalytic
DRD2	11730479_a_at	ENSG00000149295	dopamine receptor D2
DRD5P1	11762206_s_at	ENSG00000184303	dopamine receptor D5 pseudogene 1
DRD5P2	11762206_s_at	ENSG00000175658	dopamine receptor D5 pseudogene 2
DRG1	11763609_a_at	ENSG00000185721	developmentally regulated GTP binding protein 1
DRP2	11734356_a_at	ENSG00000102385	dystrophin related protein 2
DSTN	11757438_x_at	ENSG00000125868	destrin, actin depolymerizing factor
DTWD1	11747058_a_at	ENSG00000104047	DTW domain containing 1
DTWD1P1	11747058_a_at	ENSG00000214280	DTWD1 pseudogene 1
DUS4L-BCAP29	11722588_a_at	ENSG00000288558	DUS4L-BCAP29 readthrough
DUSP23	11720650_a_at	ENSG00000158716	dual specificity phosphatase 23
DUSP23	11720651_x_at	ENSG00000158716	dual specificity phosphatase 23
DYNC1LI1	11720786_a_at	ENSG00000144635	dynein cytoplasmic 1 light intermediate chain 1
DYNC2H1	11722871_a_at	ENSG00000187240	dynein cytoplasmic 2 heavy chain 1
E2F6	11746243_x_at	ENSG00000169016	E2F transcription factor 6
E2F6P1	11746243_x_at	ENSG00000234764	E2F transcription factor 6 pseudogene 1
E2F6P2	11746243_x_at	ENSG00000224688	E2F transcription factor 6 pseudogene 2
E2F6P3	11746243_x_at	ENSG00000226885	E2F transcription factor 6 pseudogene 3
EDF1	11759225_x_at	ENSG00000107223	endothelial differentiation related factor 1
EFHC2	11751782_a_at	ENSG00000183690	EF-hand domain containing 2
EFNA3	11727617_a_at	ENSG00000143590	ephrin A3
EGLN1	11733856_s_at	ENSG00000135766	egl-9 family hypoxia inducible factor 1
EIF2AK4	11754556_x_at	ENSG00000128829	eukaryotic translation initiation factor 2 alpha kinase 4
EIF2D	11761146_at	ENSG00000143486	eukaryotic translation initiation factor 2D
EIF2S1	11716219_a_at	ENSG00000134001	eukaryotic translation initiation factor 2 subunit alpha
EIF2S2	11723916_at	ENSG00000125977	eukaryotic translation initiation factor 2 subunit beta
EIF3A	11721470_s_at	ENSG00000107581	eukaryotic translation initiation factor 3 subunit A
EIF3J	11725638_a_at	ENSG00000104131	eukaryotic translation initiation factor 3 subunit J
EIF4E3	11730371_a_at	ENSG00000163412	eukaryotic translation initiation factor 4E family member 3
ELAC1	11723518_at	ENSG00000141642	elaC ribonuclease Z 1
ELFN2	11731225_a_at	ENSG00000166897	extracellular leucine rich repeat and fibronectin type III domain containing 2
ELOC	11744535_s_at	ENSG00000154582	elongin C
EMC6	11736863_a_at	ENSG00000127774	ER membrane protein complex subunit 6
ENTPD8	11732951_a_at	ENSG00000188833	ectonucleoside triphosphate diphosphohydrolase 8
EPHA1	11751296_a_at	ENSG00000146904	EPH receptor A1
EPHB1	11727656_s_at	ENSG00000154928	EPH receptor B1
EPS8L2	11716776_a_at	ENSG00000177106	EPS8 like 2
ERCC2	11735285_x_at	ENSG00000104884	ERCC excision repair 2, TFIIH core complex helicase subunit
ERLEC1	11741872_a_at	ENSG00000068912	endoplasmic reticulum lectin 1
ESRRA	11757487_x_at	ENSG00000173153	estrogen related receptor alpha
ESRRAP1	11757487_x_at	ENSG00000215572	estrogen-related receptor alpha pseudogene 1
ETFA	11716859_a_at	ENSG00000140374	electron transfer flavoprotein subunit alpha
ETFA	11731614_x_at	ENSG00000140374	electron transfer flavoprotein subunit alpha
ETFBKMT	11742014_x_at	ENSG00000139160	electron transfer flavoprotein subunit beta lysine methyltransferase
ETFRF1	11720500_a_at	ENSG00000205707	electron transfer flavoprotein regulatory factor 1
ETV3	11740264_at	ENSG00000117036	ETS variant transcription factor 3
EXOC3-AS1	11728045_at	ENSG00000221990	EXOC3 antisense RNA 1
EXOSC4	11720077_at	ENSG00000178896	exosome component 4
F2	11723003_a_at	ENSG00000180210	coagulation factor II, thrombin
F5	11723554_at	ENSG00000198734	coagulation factor V
FABP4	11716697_at	ENSG00000170323	fatty acid binding protein 4
FABP5	11718491_x_at	ENSG00000164687	fatty acid binding protein 5
FABP5P7	11718491_x_at	ENSG00000234964	fatty acid binding protein 5 pseudogene 7
FAF2	11716001_at	ENSG00000113194	Fas associated factor family member 2
FAM104B	11754221_s_at	ENSG00000182518	family with sequence similarity 104 member B
FAM124B	11734340_a_at	ENSG00000124019	family with sequence similarity 124 member B
FAM133B	11741501_s_at	ENSG00000234545	family with sequence similarity 133 member B
FAM133CP	11741501_s_at	ENSG00000183055	family with sequence similarity 133 member C, pseudogene
FAM133DP	11741501_s_at	ENSG00000230562	family with sequence similarity 133 member D, pseudogene
FAM133EP	11741501_s_at	ENSG00000270528	family with sequence similarity 133 member E, pseudogene
FAM133FP	11741501_s_at	ENSG00000225934	family with sequence similarity 133 member F, pseudogene
FAM153CP	11738031_at	ENSG00000204677	family with sequence similarity 153 member C, pseudogene
FAM153CP	11738032_x_at	ENSG00000204677	family with sequence similarity 153 member C, pseudogene
FAM204A	11726306_at	ENSG00000165669	family with sequence similarity 204 member A
FAM204A	11726307_at	ENSG00000165669	family with sequence similarity 204 member A
FAM204A	11726308_x_at	ENSG00000165669	family with sequence similarity 204 member A
FAM204A	11757717_a_at	ENSG00000165669	family with sequence similarity 204 member A
FAM210A	11728565_x_at	ENSG00000177150	family with sequence similarity 210 member A
FAM227B	11760363_at	ENSG00000166262	family with sequence similarity 227 member B
FAM8A1	11756601_a_at	ENSG00000137414	family with sequence similarity 8 member A1
FAN1	11744666_at	ENSG00000198690	FANCD2 and FANCI associated nuclease 1
FANCD2	11761656_at	ENSG00000144554	FA complementation group D2
FANCE	11733338_x_at	ENSG00000112039	FA complementation group E
FAR1	11734734_s_at	ENSG00000197601	fatty acyl-CoA reductase 1
FBLN1	11732044_at	ENSG00000077942	fibulin 1
FBN2	11729243_s_at	ENSG00000138829	fibrillin 2
FBXL5	11721315_s_at	ENSG00000118564	F-box and leucine rich repeat protein 5
FBXL9P	11731278_at	ENSG00000125122	F-box and leucine rich repeat protein, pseudogene
FBXL9P	11731278_at	ENSG00000293507	F-box and leucine rich repeat protein, pseudogene
FBXO25	11755312_a_at	ENSG00000147364	F-box protein 25
FBXO32	11719394_a_at	ENSG00000156804	F-box protein 32
FBXO36	11731125_a_at	ENSG00000153832	F-box protein 36
FBXO42	11733887_at	ENSG00000037637	F-box protein 42
FBXO48	11735190_at	ENSG00000204923	F-box protein 48
FCGR3A	11731422_s_at	ENSG00000203747	Fc gamma receptor IIIa
FCGR3B	11733005_at	ENSG00000162747	Fc gamma receptor IIIb
FEN1	11758164_s_at	ENSG00000168496	flap structure-specific endonuclease 1
FERMT2	11718181_s_at	ENSG00000073712	FERM domain containing kindlin 2
FGF12	11741009_a_at	ENSG00000114279	fibroblast growth factor 12
FGF2	11725040_at	ENSG00000138685	fibroblast growth factor 2
FGFR2	11739249_a_at	ENSG00000066468	fibroblast growth factor receptor 2
FIS1	11723286_a_at	ENSG00000214253	fission, mitochondrial 1
FKBP6	11725605_a_at	ENSG00000077800	FKBP prolyl isomerase family member 6 (inactive)
FKTN	11728510_x_at	ENSG00000106692	fukutin
FLCN	11735305_a_at	ENSG00000154803	folliculin
FMNL1	11763559_x_at	ENSG00000184922	formin like 1
FMNL1	11763644_x_at	ENSG00000184922	formin like 1
FOXI2	11734508_at	ENSG00000186766	forkhead box I2
FSD2	11737243_a_at	ENSG00000186628	fibronectin type III and SPRY domain containing 2
FUT10	11748412_a_at	ENSG00000172728	fucosyltransferase 10
FUT6	11740438_a_at	ENSG00000156413	fucosyltransferase 6
FXYD2	11737355_at	ENSG00000137731	FXYD domain containing ion transport regulator 2
GABRA4	11736807_at	ENSG00000109158	gamma-aminobutyric acid type A receptor subunit alpha4
GABRB2	11761751_at	ENSG00000145864	gamma-aminobutyric acid type A receptor subunit beta2
GABRB3	11722666_a_at	ENSG00000166206	gamma-aminobutyric acid type A receptor subunit beta3
GABRG2	11736261_a_at	ENSG00000113327	gamma-aminobutyric acid type A receptor subunit gamma2
GALNT5	11734557_a_at	ENSG00000136542	polypeptide N-acetylgalactosaminyltransferase 5
GALNT9	11760019_x_at	ENSG00000182870	polypeptide N-acetylgalactosaminyltransferase 9
GAN	11734181_at	ENSG00000261609	gigaxonin
GARIN5A	11754558_a_at	ENSG00000142530	golgi associated RAB2 interactor 5A
GCFC2	11764071_s_at	ENSG00000005436	GC-rich sequence DNA-binding factor 2
GCG	11742762_at	ENSG00000115263	glucagon
GCSH	11742888_s_at	ENSG00000140905	glycine cleavage system protein H
GCSH	11756405_s_at	ENSG00000140905	glycine cleavage system protein H
GCSH	11757061_s_at	ENSG00000140905	glycine cleavage system protein H
GCSH	11757936_s_at	ENSG00000140905	glycine cleavage system protein H
GCSHP3	11757936_s_at	ENSG00000237580	GCSH pseudogene 3
GCSHP5	11742888_s_at	ENSG00000224837	GCSH pseudogene 5
GCSHP5	11756405_s_at	ENSG00000224837	GCSH pseudogene 5
GCSHP5	11757061_s_at	ENSG00000224837	GCSH pseudogene 5
GCSHP5	11757936_s_at	ENSG00000224837	GCSH pseudogene 5
GDE1	11722794_at	ENSG00000006007	glycerophosphodiester phosphodiesterase 1
GDF11	11725506_s_at	ENSG00000135414	growth differentiation factor 11
GEMIN7	11726719_a_at	ENSG00000142252	gem nuclear organelle associated protein 7
GFI1B	11730082_a_at	ENSG00000165702	growth factor independent 1B transcriptional repressor
GFRA4	11738562_a_at	ENSG00000125861	GDNF family receptor alpha 4
GGCT	11724225_a_at	ENSG00000006625	gamma-glutamylcyclotransferase
GGH	11722818_a_at	ENSG00000137563	gamma-glutamyl hydrolase
GKAP1	11727894_a_at	ENSG00000165113	G kinase anchoring protein 1
GKAP1	11746686_a_at	ENSG00000165113	G kinase anchoring protein 1
GLRX2	11727209_a_at	ENSG00000023572	glutaredoxin 2
GLRX5	11721675_x_at	ENSG00000182512	glutaredoxin 5
GMCL1	11733830_at	ENSG00000087338	germ cell-less 1, spermatogenesis associated
GMCL1	11733831_s_at	ENSG00000087338	germ cell-less 1, spermatogenesis associated
GMCL1	11759115_x_at	ENSG00000087338	germ cell-less 1, spermatogenesis associated
GMCL2	11733831_s_at	ENSG00000244234	germ cell-less 2, spermatogenesis associated
GNA12	11751417_a_at	ENSG00000146535	G protein subunit alpha 12
GNAI1	11722802_at	ENSG00000127955	G protein subunit alpha i1
GNAI1	11749798_a_at	ENSG00000127955	G protein subunit alpha i1
GNAZ	11749524_a_at	ENSG00000128266	G protein subunit alpha z
GNRHR2	11755957_s_at	ENSG00000211451	gonadotropin releasing hormone receptor 2 (pseudogene)
GNRHR2	11755957_s_at	ENSG00000293505	gonadotropin releasing hormone receptor 2 (pseudogene)
GNRHR2P1	11755957_s_at	ENSG00000259169	GNRHR2 pseudogene 1
GOLGA3	11761452_at	ENSG00000090615	golgin A3
GOLGA4	11751219_x_at	ENSG00000144674	golgin A4
GOLPH3	11722565_a_at	ENSG00000113384	golgi phosphoprotein 3
GPN3	11754215_a_at	ENSG00000111231	GPN-loop GTPase 3
GPR137	11761184_x_at	ENSG00000173264	G protein-coupled receptor 137
GPR15	11737914_at	ENSG00000154165	G protein-coupled receptor 15
GPR176	11736656_a_at	ENSG00000166073	G protein-coupled receptor 176
GPR37	11737992_s_at	ENSG00000170775	G protein-coupled receptor 37
GPR37L1	11749533_a_at	ENSG00000170075	G protein-coupled receptor 37 like 1
GPR63	11741398_a_at	ENSG00000112218	G protein-coupled receptor 63
GPX1	11725346_x_at	ENSG00000233276	glutathione peroxidase 1
GPX1P1	11725346_x_at	ENSG00000197582	glutathione peroxidase pseudogene 1
GPX1P2	11725346_x_at	ENSG00000215326	glutathione peroxidase pseudogene 2
GRAMD4	11716661_at	ENSG00000075240	GRAM domain containing 4
GREM2	11730386_at	ENSG00000180875	gremlin 2, DAN family BMP antagonist
GRID2IP	11741371_at	ENSG00000215045	Grid2 interacting protein
GRM3	11730172_a_at	ENSG00000198822	glutamate metabotropic receptor 3
GSDMD	11760110_x_at	ENSG00000104518	gasdermin D
GSTO2	11761756_x_at	ENSG00000065621	glutathione S-transferase omega 2
GTF2E2	11716510_at	ENSG00000197265	general transcription factor IIE subunit 2
GTF2H2	11754488_s_at	ENSG00000145736	general transcription factor IIH subunit 2
GTF2H2B	11754488_s_at	ENSG00000226259	general transcription factor IIH subunit 2B (pseudogene)
GTF2H2C	11754488_s_at	ENSG00000183474	GTF2H2 family member C
GTF2H5	11725655_at	ENSG00000272047	general transcription factor IIH subunit 5
GUSBP11	11751255_a_at	ENSG00000228315	GUSB pseudogene 11
H2AC10P	11715101_s_at	ENSG00000218690	H2A clustered histone 10, pseudogene
H2AC17	11740124_at	ENSG00000278677	H2A clustered histone 17
H2AC18	11742657_x_at	ENSG00000288825	H2A clustered histone 18
H2AC19	11742657_x_at	ENSG00000288859	H2A clustered histone 19
H2AC8	11731693_at	ENSG00000277075	H2A clustered histone 8
H2BC4	11759760_s_at	ENSG00000180596	H2B clustered histone 4
H3C8	11715101_s_at	ENSG00000273983	H3 clustered histone 8
H4C3	11726246_x_at	ENSG00000197061	H4 clustered histone 3
H4C9	11733368_at	ENSG00000276180	H4 clustered histone 9
HACD1	11763835_at	ENSG00000165996	3-hydroxyacyl-CoA dehydratase 1
HACD1	11763836_x_at	ENSG00000165996	3-hydroxyacyl-CoA dehydratase 1
HAP1	11734710_a_at	ENSG00000173805	huntingtin associated protein 1
HAUS7	11746704_x_at	ENSG00000213397	HAUS augmin like complex subunit 7
HBB	11715347_s_at	ENSG00000244734	hemoglobin subunit beta
HCAR1	11750278_s_at	ENSG00000196917	hydroxycarboxylic acid receptor 1
HDAC9	11736838_a_at	ENSG00000048052	histone deacetylase 9
HDDC3	11729505_a_at	ENSG00000184508	HD domain containing 3
HEATR1	11761563_x_at	ENSG00000119285	HEAT repeat containing 1
HEBP2	11720487_a_at	ENSG00000051620	heme binding protein 2
HEPACAM2	11750918_a_at	ENSG00000188175	HEPACAM family member 2
HEY2	11758385_s_at	ENSG00000135547	hes related family bHLH transcription factor with YRPW motif 2
HIBADH	11716212_a_at	ENSG00000106049	3-hydroxyisobutyrate dehydrogenase
HIKESHI	11756211_s_at	ENSG00000149196	heat shock protein nuclear import factor hikeshi
HIKESHIP2	11756211_s_at	ENSG00000267544	HIKESHI pseudogene 2
HLA-G	11762259_x_at	ENSG00000204632	major histocompatibility complex, class I, G
HM13	11717747_s_at	ENSG00000101294	histocompatibility minor 13
HNRNPH2	11715779_a_at	ENSG00000126945	heterogeneous nuclear ribonucleoprotein H2
HNRNPH2	11715780_x_at	ENSG00000126945	heterogeneous nuclear ribonucleoprotein H2
HOXB13	11727053_at	ENSG00000159184	homeobox B13
HS6ST3	11726478_at	ENSG00000185352	heparan sulfate 6-O-sulfotransferase 3
HSDL2	11718425_a_at	ENSG00000119471	hydroxysteroid dehydrogenase like 2
HSDL2	11718426_a_at	ENSG00000119471	hydroxysteroid dehydrogenase like 2
HSDL2	11718427_s_at	ENSG00000119471	hydroxysteroid dehydrogenase like 2
HSP90AB5P	11763146_at	ENSG00000223738	heat shock protein 90 alpha family class B member 5, pseudogene
HSP90B1	11754607_s_at	ENSG00000166598	heat shock protein 90 beta family member 1
HSP90B3P	11752992_x_at	ENSG00000203914	heat shock protein 90 beta family member 3, pseudogene
HSPD1	11757531_x_at	ENSG00000144381	heat shock protein family D (Hsp60) member 1
HSPE1	11716350_a_at	ENSG00000115541	heat shock protein family E (Hsp10) member 1
HSPE1	11716351_s_at	ENSG00000115541	heat shock protein family E (Hsp10) member 1
HSPE1	11753996_x_at	ENSG00000115541	heat shock protein family E (Hsp10) member 1
HSPE1-MOB4	11716351_s_at	ENSG00000270757	HSPE1-MOB4 readthrough
HSPE1P2	11716351_s_at	ENSG00000258645	heat shock protein family E (Hsp10) member 1 pseudogene 2
HSPH1	11753964_x_at	ENSG00000120694	heat shock protein family H (Hsp110) member 1
HSPH1	11758639_s_at	ENSG00000120694	heat shock protein family H (Hsp110) member 1
HTR3A	11739827_a_at	ENSG00000166736	5-hydroxytryptamine receptor 3A
IAPP	11723219_s_at	ENSG00000121351	islet amyloid polypeptide
IER3IP1	11717902_at	ENSG00000134049	immediate early response 3 interacting protein 1
IFRD1	11748629_a_at	ENSG00000006652	interferon related developmental regulator 1
IFT70A	11755463_a_at	ENSG00000197557	intraflagellar transport 70A
IFT81	11735715_a_at	ENSG00000122970	intraflagellar transport 81
IL31RA	11753023_x_at	ENSG00000164509	interleukin 31 receptor A
IL36A	11734628_at	ENSG00000136694	interleukin 36 alpha
ILF3	11740781_a_at	ENSG00000129351	interleukin enhancer binding factor 3
ILRUN	11717122_s_at	ENSG00000196821	inflammation and lipid regulator with UBA-like and NBR1-like domains
ING5	11760003_x_at	ENSG00000168395	inhibitor of growth family member 5
INTS3	11720354_a_at	ENSG00000143624	integrator complex subunit 3
IP6K3	11730620_a_at	ENSG00000161896	inositol hexakisphosphate kinase 3
IP6K3	11731356_a_at	ENSG00000161896	inositol hexakisphosphate kinase 3
IPO5	11718106_s_at	ENSG00000065150	importin 5
IQCC	11735233_a_at	ENSG00000160051	IQ motif containing C
IQCJ-SCHIP1	11724901_s_at	ENSG00000283154	IQCJ-SCHIP1 readthrough
IRAK2	11733241_at	ENSG00000134070	interleukin 1 receptor associated kinase 2
IRGM	11734641_at	ENSG00000237693	immunity related GTPase M
ISCA1	11716466_s_at	ENSG00000135070	iron-sulfur cluster assembly 1
ISCA1	11716467_x_at	ENSG00000135070	iron-sulfur cluster assembly 1
ISCA1	11716468_s_at	ENSG00000135070	iron-sulfur cluster assembly 1
ISCA1P1	11716466_s_at	ENSG00000217416	iron-sulfur cluster assembly 1 pseudogene 1
ISCA1P1	11716467_x_at	ENSG00000217416	iron-sulfur cluster assembly 1 pseudogene 1
ISCA1P1	11716468_s_at	ENSG00000217416	iron-sulfur cluster assembly 1 pseudogene 1
ISCA1P6	11716467_x_at	ENSG00000227653	iron-sulfur cluster assembly 1 pseudogene 6
ISCA1P6	11716468_s_at	ENSG00000227653	iron-sulfur cluster assembly 1 pseudogene 6
ISOC2	11729316_a_at	ENSG00000063241	isochorismatase domain containing 2
ITGA10	11727715_at	ENSG00000143127	integrin subunit alpha 10
ITGB1BP2	11738054_a_at	ENSG00000147166	integrin subunit beta 1 binding protein 2
JAG1	11720825_s_at	ENSG00000101384	jagged canonical Notch ligand 1
JTB	11715989_a_at	ENSG00000143543	jumping translocation breakpoint
KALRN	11728160_at	ENSG00000160145	kalirin RhoGEF kinase
KCNH5	11742221_a_at	ENSG00000140015	potassium voltage-gated channel subfamily H member 5
KCNIP4	11750521_a_at	ENSG00000185774	potassium voltage-gated channel interacting protein 4
KCNJ14	11740949_a_at	ENSG00000182324	potassium inwardly rectifying channel subfamily J member 14
KCNK17	11740161_a_at	ENSG00000124780	potassium two pore domain channel subfamily K member 17
KCNK9	11730543_at	ENSG00000169427	potassium two pore domain channel subfamily K member 9
KCNN1	11731935_a_at	ENSG00000105642	potassium calcium-activated channel subfamily N member 1
KCTD15	11758536_s_at	ENSG00000153885	potassium channel tetramerization domain containing 15
KDM5B	11758815_a_at	ENSG00000117139	lysine demethylase 5B
KHDC1	11728120_at	ENSG00000135314	KH domain containing 1
KIF13A	11741537_a_at	ENSG00000137177	kinesin family member 13A
KIF18B	11741333_s_at	ENSG00000186185	kinesin family member 18B
KIF18B	11746629_s_at	ENSG00000186185	kinesin family member 18B
KIF19	11734242_x_at	ENSG00000196169	kinesin family member 19
KIF21A	11757982_s_at	ENSG00000139116	kinesin family member 21A
KIF2A	11758822_at	ENSG00000068796	kinesin family member 2A
KIF9	11749507_a_at	ENSG00000088727	kinesin family member 9
KIRREL3	11746716_s_at	ENSG00000149571	kirre like nephrin family adhesion molecule 3
KLF14	11762450_at	ENSG00000266265	KLF transcription factor 14
KLF8	11729484_a_at	ENSG00000102349	KLF transcription factor 8
KLHDC7A	11755226_s_at	ENSG00000179023	kelch domain containing 7A
KLHL23	11760228_s_at	ENSG00000213160	kelch like family member 23
KLHL23	11760229_x_at	ENSG00000213160	kelch like family member 23
KLK12	11738279_a_at	ENSG00000186474	kallikrein related peptidase 12
KLK14	11735529_s_at	ENSG00000129437	kallikrein related peptidase 14
KMT2CP1	11762206_s_at	ENSG00000290869	lysine methyltransferase 2C pseudogene 1
KNDC1	11729883_at	ENSG00000171798	kinase non-catalytic C-lobe domain containing 1
KPNA4	11732194_s_at	ENSG00000186432	karyopherin subunit alpha 4
KPNA4	11732195_at	ENSG00000186432	karyopherin subunit alpha 4
KPRP	11733281_at	ENSG00000203786	keratinocyte proline rich protein
KRCC1	11726002_s_at	ENSG00000172086	lysine rich coiled-coil 1
KRT23	11744424_a_at	ENSG00000108244	keratin 23
KRT27	11731376_at	ENSG00000171446	keratin 27
KRT36	11742475_a_at	ENSG00000126337	keratin 36
KRT38	11741971_at	ENSG00000171360	keratin 38
KRT6A	11748484_x_at	ENSG00000205420	keratin 6A
KRT87P	11761509_x_at	ENSG00000135477	keratin 87, pseudogene
KRT87P	11761509_x_at	ENSG00000290966	keratin 87, pseudogene
KRTAP10-10	11742149_x_at	ENSG00000221859	keratin associated protein 10-10
KRTAP1-1	11753499_a_at	ENSG00000188581	keratin associated protein 1-1
KRTAP17-1	11741849_x_at	ENSG00000186860	keratin associated protein 17-1
KRTAP19-2	11759393_at	ENSG00000186965	keratin associated protein 19-2
KRTAP3-1	11738302_s_at	ENSG00000212901	keratin associated protein 3-1
KRTAP4-12	11735908_a_at	ENSG00000213416	keratin associated protein 4-12
KRTAP5-2	11750368_a_at	ENSG00000205867	keratin associated protein 5-2
KRTAP5-5	11738353_s_at	ENSG00000185940	keratin associated protein 5-5
KTN1	11717072_x_at	ENSG00000126777	kinectin 1
KTN1	11732409_a_at	ENSG00000126777	kinectin 1
KTN1	11743491_x_at	ENSG00000126777	kinectin 1
KTN1	11744926_x_at	ENSG00000126777	kinectin 1
KTN1	11747672_a_at	ENSG00000126777	kinectin 1
KTN1	11756394_a_at	ENSG00000126777	kinectin 1
KYAT3	11734755_a_at	ENSG00000137944	kynurenine aminotransferase 3
LACTB2	11742823_a_at	ENSG00000147592	lactamase beta 2
LALBA	11737231_at	ENSG00000167531	lactalbumin alpha
LARP6	11722417_a_at	ENSG00000166173	La ribonucleoprotein 6, translational regulator
LARP6	11727773_at	ENSG00000166173	La ribonucleoprotein 6, translational regulator
LCE1E	11735685_at	ENSG00000186226	late cornified envelope 1E
LCMT2	11723018_at	ENSG00000168806	leucine carboxyl methyltransferase 2
LCOR	11736870_at	ENSG00000196233	ligand dependent nuclear receptor corepressor
LCTL	11742082_a_at	ENSG00000188501	lactase like
LDHA	11733020_s_at	ENSG00000134333	lactate dehydrogenase A
LDHA	11733021_x_at	ENSG00000134333	lactate dehydrogenase A
LDHA	11742116_x_at	ENSG00000134333	lactate dehydrogenase A
LDHAP4	11733020_s_at	ENSG00000214110	lactate dehydrogenase A pseudogene 4
LDHAP5	11733020_s_at	ENSG00000213574	lactate dehydrogenase A pseudogene 5
LDHC	11724018_a_at	ENSG00000166796	lactate dehydrogenase C
LEMD1	11732060_a_at	ENSG00000186007	LEM domain containing 1
LENG9	11735457_at	ENSG00000275183	leukocyte receptor cluster member 9
LGALS1	11743721_at	ENSG00000100097	galectin 1
LGALS17A	11735822_at	ENSG00000291086	galectin 14 pseudogene
LIAT1	11755220_a_at	ENSG00000187624	ligand of ATE1
LIG3	11735658_a_at	ENSG00000005156	DNA ligase 3
LILRA6	11761602_x_at	ENSG00000244482	leukocyte immunoglobulin like receptor A6
LILRB3	11761602_x_at	ENSG00000204577	leukocyte immunoglobulin like receptor B3
LIMD1	11728486_a_at	ENSG00000144791	LIM domain containing 1
LINC00323	11763372_at	ENSG00000226496	long intergenic non-protein coding RNA 323
LINC00494	11746307_s_at	ENSG00000235621	long intergenic non-protein coding RNA 494
LINC01465	11737214_at	ENSG00000221949	long intergenic non-protein coding RNA 1465
LINC01522	11746307_s_at	ENSG00000237423	long intergenic non-protein coding RNA 1522
LINC02447	11757212_at	ENSG00000245468	long intergenic non-protein coding RNA 2447
LINC02687	11759977_at	ENSG00000255267	long intergenic non-protein coding RNA 2687
LINC02853	11763994_at	ENSG00000259245	long intergenic non-protein coding RNA 2853
LINC02899	11763086_at	ENSG00000248874	long intergenic non-protein coding RNA 2899
LINGO1	11728336_a_at	ENSG00000169783	leucine rich repeat and Ig domain containing 1
LMO3	11762253_at	ENSG00000048540	LIM domain only 3
LNX2	11724440_at	ENSG00000139517	ligand of numb-protein X 2
LPL	11718972_at	ENSG00000175445	lipoprotein lipase
LPL	11718974_at	ENSG00000175445	lipoprotein lipase
LRRC14B	11763349_at	ENSG00000185028	leucine rich repeat containing 14B
LRRK2	11735294_a_at	ENSG00000188906	leucine rich repeat kinase 2
LUZP2	11734197_at	ENSG00000187398	leucine zipper protein 2
MAGEA8	11731040_at	ENSG00000156009	MAGE family member A8
MALRD1	11744864_at	ENSG00000204740	MAM and LDL receptor class A domain containing 1
MANF	11715795_at	ENSG00000145050	mesencephalic astrocyte derived neurotrophic factor
MAOB	11719499_at	ENSG00000069535	monoamine oxidase B
MAP3K19	11735381_a_at	ENSG00000176601	mitogen-activated protein kinase kinase kinase 19
MAPK14	11759946_at	ENSG00000112062	mitogen-activated protein kinase 14
MAPK8IP2	11724942_x_at	ENSG00000008735	mitogen-activated protein kinase 8 interacting protein 2
MAPK8IP2	11735425_x_at	ENSG00000008735	mitogen-activated protein kinase 8 interacting protein 2
MAPK8IP2	11752427_a_at	ENSG00000008735	mitogen-activated protein kinase 8 interacting protein 2
MAPK8IP3	11718444_x_at	ENSG00000138834	mitogen-activated protein kinase 8 interacting protein 3
MARCHF11	11743026_at	ENSG00000183654	membrane associated ring-CH-type finger 11
MARCHF5	11743139_a_at	ENSG00000198060	membrane associated ring-CH-type finger 5
MARCHF5	11754252_a_at	ENSG00000198060	membrane associated ring-CH-type finger 5
MAS1	11737224_at	ENSG00000130368	MAS1 proto-oncogene, G protein-coupled receptor
MATCAP2	11760610_at	ENSG00000164542	microtubule associated tyrosine carboxypeptidase 2
MAX	11728150_at	ENSG00000125952	MYC associated factor X
MAX	11733720_at	ENSG00000125952	MYC associated factor X
MCF2	11754152_a_at	ENSG00000101977	MCF.2 cell line derived transforming sequence
MCMBP	11717646_a_at	ENSG00000197771	minichromosome maintenance complex binding protein
MCTS1	11717747_s_at	ENSG00000232119	MCTS1 re-initiation and release factor
MCTS1	11717748_x_at	ENSG00000232119	MCTS1 re-initiation and release factor
MCTS2	11717747_s_at	ENSG00000101898	MCTS family member 2
ME3	11732580_a_at	ENSG00000151376	malic enzyme 3
MED16	11756057_a_at	ENSG00000175221	mediator complex subunit 16
MED19	11737113_a_at	ENSG00000156603	mediator complex subunit 19
MED31	11734794_a_at	ENSG00000108590	mediator complex subunit 31
MED7	11741446_s_at	ENSG00000155868	mediator complex subunit 7
MEF2B	11722745_a_at	ENSG00000213999	myocyte enhancer factor 2B
MEP1A	11730867_at	ENSG00000112818	meprin A subunit alpha
MESD	11761209_a_at	ENSG00000117899	mesoderm development LRP chaperone
MET	11752248_a_at	ENSG00000105976	MET proto-oncogene, receptor tyrosine kinase
MFAP3L	11732431_a_at	ENSG00000198948	microfibril associated protein 3 like
MFN1	11731456_at	ENSG00000171109	mitofusin 1
MFN2	11741010_a_at	ENSG00000116688	mitofusin 2
MFRP	11735345_at	ENSG00000235718	membrane frizzled-related protein
MGAM	11731271_a_at	ENSG00000257335	maltase-glucoamylase
MGST2	11753715_a_at	ENSG00000085871	microsomal glutathione S-transferase 2
MGST3	11757020_x_at	ENSG00000143198	microsomal glutathione S-transferase 3
MIER1	11729389_a_at	ENSG00000198160	MIER1 transcriptional regulator
MIIP	11756218_x_at	ENSG00000116691	migration and invasion inhibitory protein
MIR1180	11746488_a_at	ENSG00000221540	microRNA 1180
MIR1227	11717846_a_at	ENSG00000221411	microRNA 1227
MIR17HG	11744964_a_at	ENSG00000215417	miR-17-92a-1 cluster host gene
MIR4721	11715468_at	ENSG00000283845	microRNA 4721
MIR601	11755028_a_at	ENSG00000207991	microRNA 601
MIR6847	11720077_at	ENSG00000284200	microRNA 6847
MLANA	11734012_at	ENSG00000120215	melan-A
MLYCD	11721028_at	ENSG00000103150	malonyl-CoA decarboxylase
MMP16	11736865_a_at	ENSG00000156103	matrix metallopeptidase 16
MMUT	11723652_a_at	ENSG00000146085	methylmalonyl-CoA mutase
MOG	11746763_x_at	ENSG00000204655	myelin oligodendrocyte glycoprotein
MORC1	11735179_at	ENSG00000114487	MORC family CW-type zinc finger 1
MORN2	11719202_a_at	ENSG00000188010	MORN repeat containing 2
MOSPD2	11743736_at	ENSG00000130150	motile sperm domain containing 2
MOV10L1	11751992_x_at	ENSG00000073146	Mov10 like RISC complex RNA helicase 1
MPP2	11725947_at	ENSG00000108852	MAGUK p55 scaffold protein 2
MRNIP	11760338_at	ENSG00000161010	MRN complex interacting protein
MRPL13	11715771_a_at	ENSG00000172172	mitochondrial ribosomal protein L13
MRPL13	11715772_x_at	ENSG00000172172	mitochondrial ribosomal protein L13
MRPL33	11723056_a_at	ENSG00000243147	mitochondrial ribosomal protein L33
MRPL33	11723057_x_at	ENSG00000243147	mitochondrial ribosomal protein L33
MRPL33	11757411_x_at	ENSG00000243147	mitochondrial ribosomal protein L33
MRPL36	11716617_at	ENSG00000171421	mitochondrial ribosomal protein L36
MRPL42	11748157_a_at	ENSG00000198015	mitochondrial ribosomal protein L42
MRPL57	11736213_at	ENSG00000173141	mitochondrial ribosomal protein L57
MRPS10	11722263_at	ENSG00000048544	mitochondrial ribosomal protein S10
MRPS11	11764001_x_at	ENSG00000181991	mitochondrial ribosomal protein S11
MRPS14	11745735_a_at	ENSG00000120333	mitochondrial ribosomal protein S14
MRPS15	11719566_a_at	ENSG00000116898	mitochondrial ribosomal protein S15
MRPS16	11720171_s_at	ENSG00000182180	mitochondrial ribosomal protein S16
MRPS16	11759073_a_at	ENSG00000182180	mitochondrial ribosomal protein S16
MRPS21	11716312_at	ENSG00000266472	mitochondrial ribosomal protein S21
MRPS28	11730249_at	ENSG00000147586	mitochondrial ribosomal protein S28
MRPS33	11733134_a_at	ENSG00000090263	mitochondrial ribosomal protein S33
MRPS36	11727060_a_at	ENSG00000134056	mitochondrial ribosomal protein S36
MRRF	11751453_a_at	ENSG00000148187	mitochondrial ribosome recycling factor
MRS2	11725682_x_at	ENSG00000124532	magnesium transporter MRS2
MSANTD3-TMEFF1	11722537_at	ENSG00000251349	MSANTD3-TMEFF1 readthrough
MSH2	11749490_x_at	ENSG00000095002	mutS homolog 2
MSMB	11727966_a_at	ENSG00000263639	microseminoprotein beta
MSRB1	11716738_at	ENSG00000198736	methionine sulfoxide reductase B1
MT1F	11721878_x_at	ENSG00000198417	metallothionein 1F
MT1X	11757581_x_at	ENSG00000187193	metallothionein 1X
MTCP1	11717654_a_at	ENSG00000214827	mature T cell proliferation 1
MTERF3	11723347_a_at	ENSG00000156469	mitochondrial transcription termination factor 3
MTERF4	11742965_a_at	ENSG00000122085	mitochondrial transcription termination factor 4
MTFP1	11717710_a_at	ENSG00000242114	mitochondrial fission process 1
MTHFD1L	11756196_a_at	ENSG00000120254	methylenetetrahydrofolate dehydrogenase (NADP+ dependent) 1 like
MTMR14	11761704_at	ENSG00000163719	myotubularin related protein 14
MVP-DT	11762868_a_at	ENSG00000238045	MVP divergent transcript
MYBPC1	11745523_a_at	ENSG00000196091	myosin binding protein C1
MYBPHL	11738098_a_at	ENSG00000221986	myosin binding protein H like
MYDGF	11717485_a_at	ENSG00000074842	myeloid derived growth factor
MYDGF	11757284_x_at	ENSG00000074842	myeloid derived growth factor
MYEF2	11727997_a_at	ENSG00000104177	myelin expression factor 2
MYH8	11752161_a_at	ENSG00000133020	myosin heavy chain 8
MYL6	11716794_a_at	ENSG00000092841	myosin light chain 6
MYL6B	11716794_a_at	ENSG00000196465	myosin light chain 6B
MYLK3	11746400_a_at	ENSG00000140795	myosin light chain kinase 3
MYO6	11715909_s_at	ENSG00000196586	myosin VI
NAPEPLD	11746846_a_at	ENSG00000161048	N-acyl phosphatidylethanolamine phospholipase D
NAT8B	11732033_at	ENSG00000204872	N-acetyltransferase 8B (putative, gene/pseudogene)
NCMAP	11733622_x_at	ENSG00000184454	non-compact myelin associated protein
NDFIP1	11715509_a_at	ENSG00000131507	Nedd4 family interacting protein 1
NDUFA8	11716205_a_at	ENSG00000119421	NADH:ubiquinone oxidoreductase subunit A8
NDUFAF2	11758314_s_at	ENSG00000164182	NADH:ubiquinone oxidoreductase complex assembly factor 2
NDUFAF2P1	11758314_s_at	ENSG00000279307	NDUFAF2 pseudogene 1
NDUFAF4	11720193_x_at	ENSG00000123545	NADH:ubiquinone oxidoreductase complex assembly factor 4
NDUFB1	11721296_a_at	ENSG00000183648	NADH:ubiquinone oxidoreductase subunit B1
NDUFB5	11727026_a_at	ENSG00000136521	NADH:ubiquinone oxidoreductase subunit B5
NDUFB5	11757567_x_at	ENSG00000136521	NADH:ubiquinone oxidoreductase subunit B5
NDUFB6	11717670_a_at	ENSG00000165264	NADH:ubiquinone oxidoreductase subunit B6
NDUFB6	11741789_a_at	ENSG00000165264	NADH:ubiquinone oxidoreductase subunit B6
NDUFB8	11716414_a_at	ENSG00000166136	NADH:ubiquinone oxidoreductase subunit B8
NDUFS1	11757936_s_at	ENSG00000023228	NADH:ubiquinone oxidoreductase core subunit S1
NDUFV2	11718282_s_at	ENSG00000178127	NADH:ubiquinone oxidoreductase core subunit V2
NDUFV2P1	11718282_s_at	ENSG00000267809	NADH:ubiquinone oxidoreductase core subunit V2 pseudogene 1
NDUFV3	11723072_x_at	ENSG00000160194	NADH:ubiquinone oxidoreductase subunit V3
NDUFV3	11723449_a_at	ENSG00000160194	NADH:ubiquinone oxidoreductase subunit V3
NDUFV3	11745460_at	ENSG00000160194	NADH:ubiquinone oxidoreductase subunit V3
NEBL	11748685_a_at	ENSG00000078114	nebulette
NEDD4L	11758571_s_at	ENSG00000049759	NEDD4 like E3 ubiquitin protein ligase
NENF	11718661_at	ENSG00000117691	neudesin neurotrophic factor
NEXMIF	11731189_at	ENSG00000050030	neurite extension and migration factor
NFIL3	11743010_at	ENSG00000165030	nuclear factor, interleukin 3 regulated
NINL	11739480_a_at	ENSG00000101004	ninein like
NIT2	11721514_a_at	ENSG00000114021	nitrilase family member 2
NKAIN2	11762834_at	ENSG00000188580	sodium/potassium transporting ATPase interacting 2
NLGN4X	11730993_a_at	ENSG00000146938	neuroligin 4 X-linked
NLGN4X	11741130_a_at	ENSG00000146938	neuroligin 4 X-linked
NLGN4X	11741131_a_at	ENSG00000146938	neuroligin 4 X-linked
NLRP8	11742438_at	ENSG00000179709	NLR family pyrin domain containing 8
NNT	11743518_s_at	ENSG00000112992	nicotinamide nucleotide transhydrogenase
NOC2LP1	11761158_x_at	ENSG00000213225	NOC2 like nucleolar associated transcriptional repressor pseudogene 1
NOX5	11759929_at	ENSG00000255346	NADPH oxidase 5
NOX5	11759929_at	ENSG00000290203	NADPH oxidase 5
NPAS2	11749671_a_at	ENSG00000170485	neuronal PAS domain protein 2
NPC1L1	11741469_a_at	ENSG00000015520	NPC1 like intracellular cholesterol transporter 1
NPEPPS	11716691_a_at	ENSG00000141279	aminopeptidase puromycin sensitive
NPEPPS	11746097_a_at	ENSG00000141279	aminopeptidase puromycin sensitive
NRBF2	11752692_x_at	ENSG00000148572	nuclear receptor binding factor 2
NRBF2P4	11752692_x_at	ENSG00000253228	nuclear receptor binding factor 2 pseudogene 4
NRG3	11753349_a_at	ENSG00000185737	neuregulin 3
NSMCE2	11721042_at	ENSG00000156831	NSE2 (MMS21) homolog, SMC5-SMC6 complex SUMO ligase
NSUN2	11756663_a_at	ENSG00000037474	NOP2/Sun RNA methyltransferase 2
NTMT1	11756652_a_at	ENSG00000148335	N-terminal Xaa-Pro-Lys N-methyltransferase 1
NTNG2	11755389_s_at	ENSG00000196358	netrin G2
NUDT15	11758564_s_at	ENSG00000136159	nudix hydrolase 15
NUDT5	11721120_a_at	ENSG00000165609	nudix hydrolase 5
NUDT5	11756280_a_at	ENSG00000165609	nudix hydrolase 5
NUP210P1	11759788_at	ENSG00000293201	nucleoporin 210 pseudogene 1
NUP58	11720796_x_at	ENSG00000139496	nucleoporin 58
NUTF2	11757599_x_at	ENSG00000102898	nuclear transport factor 2
NXPE2	11742275_at	ENSG00000204361	neurexophilin and PC-esterase domain family member 2
NXT1	11721672_at	ENSG00000132661	nuclear transport factor 2 like export factor 1
NAA50	11721799_s_at	ENSG00000121579	N-alpha-acetyltransferase 50, NatE catalytic subunit
ODF4	11732912_at	ENSG00000184650	outer dense fiber of sperm tails 4
ODR4	11722432_at	ENSG00000157181	odr-4 GPCR localization factor homolog
OGDH	11733916_at	ENSG00000105953	oxoglutarate dehydrogenase
OGFOD2	11761641_at	ENSG00000111325	2-oxoglutarate and iron dependent oxygenase domain containing 2
OLA1	11730188_s_at	ENSG00000138430	Obg like ATPase 1
OLA1	11730189_x_at	ENSG00000138430	Obg like ATPase 1
OLA1P1	11730188_s_at	ENSG00000213790	OLA1 pseudogene 1
OLA1P1	11730189_x_at	ENSG00000213790	OLA1 pseudogene 1
OPRK1	11763621_a_at	ENSG00000082556	opioid receptor kappa 1
OR10W1	11738560_at	ENSG00000172772	olfactory receptor family 10 subfamily W member 1
OR10X1	11742539_at	ENSG00000279111	olfactory receptor family 10 subfamily X member 1
OR10Z1	11742581_at	ENSG00000198967	olfactory receptor family 10 subfamily Z member 1
OR1D2	11732974_at	ENSG00000184166	olfactory receptor family 1 subfamily D member 2
OR1I1	11742310_at	ENSG00000094661	olfactory receptor family 1 subfamily I member 1
OR1J4	11742157_at	ENSG00000239590	olfactory receptor family 1 subfamily J member 4
OR2C3	11752151_a_at	ENSG00000196242	olfactory receptor family 2 subfamily C member 3
OR2T11	11742345_at	ENSG00000279301	olfactory receptor family 2 subfamily T member 11
OR4C6	11738421_at	ENSG00000181903	olfactory receptor family 4 subfamily C member 6
OR4E2	11742384_at	ENSG00000221977	olfactory receptor family 4 subfamily E member 2
OR4F13P	11762570_at	ENSG00000214344	olfactory receptor family 4 subfamily F member 13 pseudogene
OR4F13P	11762570_at	ENSG00000291191	olfactory receptor family 4 subfamily F member 13 pseudogene
OR4K13	11742633_at	ENSG00000176253	olfactory receptor family 4 subfamily K member 13
OR51D1	11742329_at	ENSG00000197428	olfactory receptor family 51 subfamily D member 1
OR5H6	11738692_at	ENSG00000230301	olfactory receptor family 5 subfamily H member 6
OR6C4	11738739_at	ENSG00000179626	olfactory receptor family 6 subfamily C member 4
OR6W1P	11757247_s_at	ENSG00000179420	olfactory receptor family 6 subfamily W member 1 pseudogene
ORC4	11730784_x_at	ENSG00000115947	origin recognition complex subunit 4
ORC5	11727070_a_at	ENSG00000164815	origin recognition complex subunit 5
ORC5	11737709_x_at	ENSG00000164815	origin recognition complex subunit 5
ORMDL3	11736188_a_at	ENSG00000172057	ORMDL sphingolipid biosynthesis regulator 3
OSBPL1A	11724061_s_at	ENSG00000141447	oxysterol binding protein like 1A
OTUD3	11723571_at	ENSG00000169914	OTU deubiquitinase 3
OVCH1	11742440_at	ENSG00000187950	ovochymase 1
PABIR1	11752722_a_at	ENSG00000187866	PP2A Aalpha (PPP2R1A) and B55A (PPP2R2A) interacting phosphatase regulator 1
PABPN1L	11762814_x_at	ENSG00000205022	PABPN1 like, cytoplasmic
PAIP1	11733936_a_at	ENSG00000172239	poly(A) binding protein interacting protein 1
PAM16	11757649_a_at	ENSG00000217930	presequence translocase associated motor 16
PANK1	11744995_s_at	ENSG00000152782	pantothenate kinase 1
PAQR6	11726980_a_at	ENSG00000160781	progestin and adipoQ receptor family member 6
PARD6G-AS1	11734499_a_at	ENSG00000267270	PARD6G antisense RNA 1
PBLD	11732326_x_at	ENSG00000108187	phenazine biosynthesis like protein domain containing
PCBD2	11739911_at	ENSG00000132570	pterin-4 alpha-carbinolamine dehydratase 2
PCDHA1	11742084_a_at	ENSG00000204970	protocadherin alpha 1
PCDHA10	11738253_x_at	ENSG00000250120	protocadherin alpha 10
PCDHA10	11742055_a_at	ENSG00000250120	protocadherin alpha 10
PCDHA11	11742055_a_at	ENSG00000249158	protocadherin alpha 11
PCDHGA1	11759247_x_at	ENSG00000204956	protocadherin gamma subfamily A, 1
PCDHGA10	11737133_x_at	ENSG00000253846	protocadherin gamma subfamily A, 10
PCDHGA4	11735875_a_at	ENSG00000262576	protocadherin gamma subfamily A, 4
PCMT1	11718778_s_at	ENSG00000120265	protein-L-isoaspartate (D-aspartate) O-methyltransferase
PCMT1	11746084_a_at	ENSG00000120265	protein-L-isoaspartate (D-aspartate) O-methyltransferase
PCNX1	11722107_at	ENSG00000100731	pecanex 1
PCNX1	11722108_at	ENSG00000100731	pecanex 1
PDAP1	11717304_x_at	ENSG00000106244	PDGFA associated protein 1
PDCD10	11718804_x_at	ENSG00000114209	programmed cell death 10
PDCD2	11753396_x_at	ENSG00000071994	programmed cell death 2
PDCD6	11759803_a_at	ENSG00000249915	programmed cell death 6
PDCD6	11759804_x_at	ENSG00000249915	programmed cell death 6
PDCD6-AHRR	11729561_a_at	ENSG00000288622	PDCD6-AHRR readthrough (NMD candidate)
PDE1C	11744996_a_at	ENSG00000154678	phosphodiesterase 1C
PDF	11724303_a_at	ENSG00000258429	peptide deformylase, mitochondrial
PDHX	11718840_s_at	ENSG00000110435	pyruvate dehydrogenase complex component X
PDHX	11740371_s_at	ENSG00000110435	pyruvate dehydrogenase complex component X
PDLIM2	11737917_at	ENSG00000120913	PDZ and LIM domain 2
PDZD7	11739993_x_at	ENSG00000186862	PDZ domain containing 7
PEG10	11718359_a_at	ENSG00000242265	paternally expressed 10
PENK	11764065_at	ENSG00000181195	proenkephalin
PGAP1	11731738_a_at	ENSG00000197121	post-GPI attachment to proteins inositol deacylase 1
PGM1	11748423_a_at	ENSG00000079739	phosphoglucomutase 1
PGM1	11756127_a_at	ENSG00000079739	phosphoglucomutase 1
PGM5	11761608_at	ENSG00000154330	phosphoglucomutase 5
PGS1	11748428_a_at	ENSG00000087157	phosphatidylglycerophosphate synthase 1
PHACTR1	11750835_a_at	ENSG00000112137	phosphatase and actin regulator 1
PHYH	11729681_a_at	ENSG00000107537	phytanoyl-CoA 2-hydroxylase
PI15	11751270_a_at	ENSG00000137558	peptidase inhibitor 15
PIBF1	11762447_at	ENSG00000083535	progesterone immunomodulatory binding factor 1
PICK1	11723210_a_at	ENSG00000100151	protein interacting with PRKCA 1
PIGL	11727278_at	ENSG00000108474	phosphatidylinositol glycan anchor biosynthesis class L
PIGM	11729150_at	ENSG00000143315	phosphatidylinositol glycan anchor biosynthesis class M
PKIB	11727553_a_at	ENSG00000135549	cAMP-dependent protein kinase inhibitor beta
PKIB	11727554_s_at	ENSG00000135549	cAMP-dependent protein kinase inhibitor beta
PKIB	11732699_a_at	ENSG00000135549	cAMP-dependent protein kinase inhibitor beta
PKIB	11732700_x_at	ENSG00000135549	cAMP-dependent protein kinase inhibitor beta
PKIB	11755975_x_at	ENSG00000135549	cAMP-dependent protein kinase inhibitor beta
PKN2	11758207_s_at	ENSG00000065243	protein kinase N2
PLA2G12A	11728277_x_at	ENSG00000123739	phospholipase A2 group XIIA
PLA2G3	11733633_at	ENSG00000100078	phospholipase A2 group III
PLA2G4A	11727754_a_at	ENSG00000116711	phospholipase A2 group IVA
PLAC1	11722315_a_at	ENSG00000170965	placenta enriched 1
PLAC4	11727073_a_at	ENSG00000280109	placenta enriched 4
PLAC4	11727076_x_at	ENSG00000280109	placenta enriched 4
PLCG1	11723761_a_at	ENSG00000124181	phospholipase C gamma 1
PLEKHA3	11727407_at	ENSG00000116095	pleckstrin homology domain containing A3
PLEKHA3P1	11727407_at	ENSG00000269800	pleckstrin homology domain containing A3 pseudogene 1
PLEKHG4B	11733471_at	ENSG00000153404	pleckstrin homology and RhoGEF domain containing G4B
PLEKHG4B	11763349_at	ENSG00000153404	pleckstrin homology and RhoGEF domain containing G4B
PLEKHJ1	11717846_a_at	ENSG00000104886	pleckstrin homology domain containing J1
PLOD2	11721333_a_at	ENSG00000152952	procollagen-lysine,2-oxoglutarate 5-dioxygenase 2
PLOD2	11721334_a_at	ENSG00000152952	procollagen-lysine,2-oxoglutarate 5-dioxygenase 2
PLOD2	11721335_x_at	ENSG00000152952	procollagen-lysine,2-oxoglutarate 5-dioxygenase 2
PLOD2	11748610_a_at	ENSG00000152952	procollagen-lysine,2-oxoglutarate 5-dioxygenase 2
PLXNB3	11750114_a_at	ENSG00000198753	plexin B3
PLAAT3	11721665_a_at	ENSG00000176485	phospholipase A and acyltransferase 3
PMEL	11757418_a_at	ENSG00000185664	premelanosome protein
PMM1	11724767_a_at	ENSG00000100417	phosphomannomutase 1
PMM2	11733001_a_at	ENSG00000140650	phosphomannomutase 2
PMPCB	11760356_at	ENSG00000105819	peptidase, mitochondrial processing subunit beta
PNMA3	11723932_a_at	ENSG00000183837	PNMA family member 3
PNPLA8	11745750_a_at	ENSG00000135241	patatin like phospholipase domain containing 8
PNPT1	11734725_a_at	ENSG00000138035	polyribonucleotide nucleotidyltransferase 1
POLDIP2	11730224_a_at	ENSG00000004142	DNA polymerase delta interacting protein 2
POLK	11729678_a_at	ENSG00000122008	DNA polymerase kappa
POLL	11761176_at	ENSG00000166169	DNA polymerase lambda
POLQ	11729096_a_at	ENSG00000051341	DNA polymerase theta
POLR3H	11719955_a_at	ENSG00000100413	RNA polymerase III subunit H
POLR3H	11719956_x_at	ENSG00000100413	RNA polymerase III subunit H
POMP	11718762_s_at	ENSG00000132963	proteasome maturation protein
POSTN	11736422_s_at	ENSG00000133110	periostin
POU2AF2	11734379_at	ENSG00000150750	POU class 2 homeobox associating factor 2
POU4F2	11734377_at	ENSG00000151615	POU class 4 homeobox 2
PPA2	11747013_a_at	ENSG00000138777	inorganic pyrophosphatase 2
PPAN	11720212_a_at	ENSG00000130810	peter pan homolog
PPAN	11720213_x_at	ENSG00000130810	peter pan homolog
PPAN-P2RY11	11720212_a_at	ENSG00000243207	PPAN-P2RY11 readthrough
PPAN-P2RY11	11720213_x_at	ENSG00000243207	PPAN-P2RY11 readthrough
PPAT	11731899_s_at	ENSG00000128059	phosphoribosyl pyrophosphate amidotransferase
PPATP1	11731899_s_at	ENSG00000241293	phosphoribosyl pyrophosphate amidotransferase pseudogene 1
PPCDC	11718798_at	ENSG00000138621	phosphopantothenoylcysteine decarboxylase
PPIP5K2	11726149_a_at	ENSG00000145725	diphosphoinositol pentakisphosphate kinase 2
PPP1R16B	11717660_a_at	ENSG00000101445	protein phosphatase 1 regulatory subunit 16B
PPP1R17	11741774_a_at	ENSG00000106341	protein phosphatase 1 regulatory subunit 17
PPP1R37	11726719_a_at	ENSG00000104866	protein phosphatase 1 regulatory subunit 37
PPP2R5E	11759024_at	ENSG00000154001	protein phosphatase 2 regulatory subunit B'epsilon
PPP3CB	11760342_a_at	ENSG00000107758	protein phosphatase 3 catalytic subunit beta
PRAC1	11728006_at	ENSG00000159182	PRAC1 small nuclear protein
PRADC1	11718150_at	ENSG00000135617	protease associated domain containing 1
PRADC1	11748541_s_at	ENSG00000135617	protease associated domain containing 1
PRADC1P1	11748541_s_at	ENSG00000236165	protease associated domain containing 1 pseudogene 1
PRAP1	11753654_a_at	ENSG00000165828	proline rich acidic protein 1
PRDX6	11742999_x_at	ENSG00000117592	peroxiredoxin 6
PRELID3B	11743583_at	ENSG00000101166	PRELI domain containing 3B
PRICKLE4	11750093_a_at	ENSG00000278224	prickle planar cell polarity protein 4
PRKN	11758324_s_at	ENSG00000185345	parkin RBR E3 ubiquitin protein ligase
PROK2	11732808_a_at	ENSG00000163421	prokineticin 2
PROK2	11732809_a_at	ENSG00000163421	prokineticin 2
PRPF18	11731492_at	ENSG00000165630	pre-mRNA processing factor 18
PRR12	11743195_a_at	ENSG00000126464	proline rich 12
PRR29	11748856_a_at	ENSG00000224383	proline rich 29
PRRG2	11743195_a_at	ENSG00000126460	proline rich and Gla domain 2
PRSS2	11744079_s_at	ENSG00000275896	serine protease 2
PSKH2	11738487_at	ENSG00000147613	protein serine kinase H2
PSMB5	11732666_s_at	ENSG00000100804	proteasome 20S subunit beta 5
PSMD12	11739251_a_at	ENSG00000197170	proteasome 26S subunit, non-ATPase 12
PSMD14	11733918_a_at	ENSG00000115233	proteasome 26S subunit, non-ATPase 14
PSMG1	11717856_a_at	ENSG00000183527	proteasome assembly chaperone 1
PSMG4	11738274_x_at	ENSG00000180822	proteasome assembly chaperone 4
PTGER3	11735112_at	ENSG00000050628	prostaglandin E receptor 3
PTP4A1	11717892_a_at	ENSG00000112245	protein tyrosine phosphatase 4A1
PTP4A3	11729281_s_at	ENSG00000184489	protein tyrosine phosphatase 4A3
PTP4A3	11729282_x_at	ENSG00000184489	protein tyrosine phosphatase 4A3
PTRH2	11737790_a_at	ENSG00000141378	peptidyl-tRNA hydrolase 2
PWWP3A	11721396_at	ENSG00000160953	PWWP domain containing 3A, DNA repair factor
PXMP2	11723314_x_at	ENSG00000176894	peroxisomal membrane protein 2
QKI	11722454_s_at	ENSG00000112531	QKI, KH domain containing RNA binding
QSER1	11720905_at	ENSG00000060749	glutamine and serine rich 1
R3HDM1	11737799_s_at	ENSG00000048991	R3H domain containing 1
RAB10	11758142_s_at	ENSG00000084733	RAB10, member RAS oncogene family
RAB11A	11718029_a_at	ENSG00000103769	RAB11A, member RAS oncogene family
RAB18	11747367_a_at	ENSG00000099246	RAB18, member RAS oncogene family
RAB18	11753494_x_at	ENSG00000099246	RAB18, member RAS oncogene family
RAB1A	11717723_s_at	ENSG00000138069	RAB1A, member RAS oncogene family
RAB2A	11758859_at	ENSG00000104388	RAB2A, member RAS oncogene family
RAB40A	11734388_s_at	ENSG00000172476	RAB40A, member RAS oncogene family
RAB9BP1	11753574_at	ENSG00000232159	RAB9B, member RAS oncogene family pseudogene 1
RABGGTB	11757294_x_at	ENSG00000137955	Rab geranylgeranyltransferase subunit beta
RAD1	11722869_a_at	ENSG00000113456	RAD1 checkpoint DNA exonuclease
RAD23B	11758199_s_at	ENSG00000119318	RAD23 homolog B, nucleotide excision repair protein
RAD54B	11728447_at	ENSG00000197275	RAD54 homolog B
RANBP1	11723002_x_at	ENSG00000099901	RAN binding protein 1
RANBP1P1	11723002_x_at	ENSG00000228519	RANBP1 pseudogene 1
RANBP9	11757841_s_at	ENSG00000010017	RAN binding protein 9
RAP1B	11716883_s_at	ENSG00000127314	RAP1B, member of RAS oncogene family
RAP1B	11747247_x_at	ENSG00000127314	RAP1B, member of RAS oncogene family
RAPGEF3	11725381_a_at	ENSG00000079337	Rap guanine nucleotide exchange factor 3
RASAL2	11741409_s_at	ENSG00000075391	RAS protein activator like 2
RASGRP4	11737426_a_at	ENSG00000171777	RAS guanyl releasing protein 4
RB1CC1	11743480_s_at	ENSG00000023287	RB1 inducible coiled-coil 1
RBFOX3	11760763_at	ENSG00000167281	RNA binding fox-1 homolog 3
RBM11	11746678_a_at	ENSG00000185272	RNA binding motif protein 11
RBM18	11733032_at	ENSG00000119446	RNA binding motif protein 18
RBM24	11728872_a_at	ENSG00000112183	RNA binding motif protein 24
RBM44	11752914_a_at	ENSG00000177483	RNA binding motif protein 44
RBMS2	11756747_a_at	ENSG00000076067	RNA binding motif single stranded interacting protein 2
RBMS2P1	11756747_a_at	ENSG00000213250	RNA binding motif single stranded interacting protein 2 pseudogene 1
RCBTB1	11719334_a_at	ENSG00000136144	RCC1 and BTB domain containing protein 1
RDH10	11719627_at	ENSG00000121039	retinol dehydrogenase 10
RDH10	11758544_s_at	ENSG00000121039	retinol dehydrogenase 10
REPS2	11722348_a_at	ENSG00000169891	RALBP1 associated Eps domain containing 2
RFFL	11763631_at	ENSG00000092871	ring finger and FYVE like domain containing E3 ubiquitin protein ligase
RFPL1	11737641_s_at	ENSG00000128250	ret finger protein like 1
RFPL2	11737641_s_at	ENSG00000128253	ret finger protein like 2
RFPL3	11737641_s_at	ENSG00000128276	ret finger protein like 3
RFPL4B	11737619_at	ENSG00000251258	ret finger protein like 4B
RFT1	11736396_a_at	ENSG00000163933	RFT1 homolog
RGMB	11721792_at	ENSG00000174136	repulsive guidance molecule BMP co-receptor b
RGS7BP	11730318_a_at	ENSG00000186479	regulator of G protein signaling 7 binding protein
RHOA	11725346_x_at	ENSG00000067560	ras homolog family member A
RHOC	11744352_x_at	ENSG00000155366	ras homolog family member C
RHOC	11757578_x_at	ENSG00000155366	ras homolog family member C
RHOD	11720842_at	ENSG00000173156	ras homolog family member D
RILPL1	11755904_a_at	ENSG00000188026	Rab interacting lysosomal protein like 1
RIMS2	11736729_a_at	ENSG00000176406	regulating synaptic membrane exocytosis 2
RIMS2	11736730_a_at	ENSG00000176406	regulating synaptic membrane exocytosis 2
RMDN2	11749586_x_at	ENSG00000115841	regulator of microtubule dynamics 2
RMND1	11755631_x_at	ENSG00000155906	required for meiotic nuclear division 1 homolog
RN7SKP124	11747058_a_at	ENSG00000201600	RN7SK pseudogene 124
RNASE4	11718988_s_at	ENSG00000258818	ribonuclease A family member 4
RNF152	11732768_at	ENSG00000176641	ring finger protein 152
RNF220	11760775_a_at	ENSG00000187147	ring finger protein 220
RNF32	11760633_at	ENSG00000105982	ring finger protein 32
RNF40	11758742_x_at	ENSG00000103549	ring finger protein 40
RNF7	11716755_at	ENSG00000114125	ring finger protein 7
RNU6-343P	11756747_a_at	ENSG00000201579	RNA, U6 small nuclear 343, pseudogene
ROM1	11721556_at	ENSG00000149489	retinal outer segment membrane protein 1
ROMO1	11757491_x_at	ENSG00000125995	reactive oxygen species modulator 1
ROPN1	11727670_s_at	ENSG00000065371	rhophilin associated tail protein 1
ROPN1B	11727670_s_at	ENSG00000114547	rhophilin associated tail protein 1B
ROPN1L	11720349_at	ENSG00000145491	rhophilin associated tail protein 1 like
RORB	11736952_a_at	ENSG00000198963	RAR related orphan receptor B
RPL17-C18orf32	11742875_at	ENSG00000215472	RPL17-C18orf32 readthrough
RPL26L1	11743630_s_at	ENSG00000037241	ribosomal protein L26 like 1
RPL26P30	11743630_s_at	ENSG00000236264	ribosomal protein L26 pseudogene 30
RPL37A	11760207_x_at	ENSG00000197756	ribosomal protein L37a
RPL39L	11728348_a_at	ENSG00000163923	ribosomal protein L39 like
RPL4	11757179_x_at	ENSG00000174444	ribosomal protein L4
RPL7	11715958_s_at	ENSG00000147604	ribosomal protein L7
RPL7P1	11715958_s_at	ENSG00000214485	ribosomal protein L7 pseudogene 1
RPL7P23	11715958_s_at	ENSG00000244363	ribosomal protein L7 pseudogene 23
RPL7P32	11715958_s_at	ENSG00000231006	ribosomal protein L7 pseudogene 32
RPL7P33	11715958_s_at	ENSG00000215236	ribosomal protein L7 pseudogene 33
RPL7P37	11715958_s_at	ENSG00000226646	ribosomal protein L7 pseudogene 37
RPL7P9	11715958_s_at	ENSG00000137970	ribosomal protein L7 pseudogene 9
RPL9	11715237_s_at	ENSG00000163682	ribosomal protein L9
RPL9P25	11715237_s_at	ENSG00000240821	ribosomal protein L9 pseudogene 25
RPL9P32	11715237_s_at	ENSG00000242100	ribosomal protein L9 pseudogene 32
RPL9P7	11715237_s_at	ENSG00000238103	ribosomal protein L9 pseudogene 7
RPP21	11755722_s_at	ENSG00000241370	ribonuclease P/MRP subunit p21
RPP40	11724083_a_at	ENSG00000124787	ribonuclease P/MRP subunit p40
RPS13	200018_PM_at	ENSG00000110700	ribosomal protein S13
RPS13P2	200018_PM_at	ENSG00000228929	ribosomal protein S13 pseudogene 2
RPS6KA5	11735634_at	ENSG00000100784	ribosomal protein S6 kinase A5
RRP8	11756354_a_at	ENSG00000132275	ribosomal RNA processing 8
RTL6	11719152_s_at	ENSG00000188636	retrotransposon Gag like 6
RTN4IP1	11754850_a_at	ENSG00000130347	reticulon 4 interacting protein 1
RWDD2A	11746240_a_at	ENSG00000013392	RWD domain containing 2A
RWDD4	11722398_s_at	ENSG00000182552	RWD domain containing 4
RWDD4P2	11722398_s_at	ENSG00000175741	RWD domain containing 4 pseudogene 2
S100A1	11725048_a_at	ENSG00000160678	S100 calcium binding protein A1
S100A8	11753823_a_at	ENSG00000143546	S100 calcium binding protein A8
S100A9	11716523_at	ENSG00000163220	S100 calcium binding protein A9
S1PR3	11725906_a_at	ENSG00000213694	sphingosine-1-phosphate receptor 3
SCAF1	11753507_a_at	ENSG00000126461	SR-related CTD associated factor 1
SCAMP4	11744023_at	ENSG00000227500	secretory carrier membrane protein 4
SCFD2	11723959_at	ENSG00000184178	sec1 family domain containing 2
SCHIP1	11724901_s_at	ENSG00000151967	schwannomin interacting protein 1
SCN3B	11726423_a_at	ENSG00000166257	sodium voltage-gated channel beta subunit 3
SCOC	11751213_s_at	ENSG00000153130	short coiled-coil protein
SCOC	11757358_s_at	ENSG00000153130	short coiled-coil protein
SCRN2	11722256_a_at	ENSG00000141295	secernin 2
SDHAF4	11730451_at	ENSG00000154079	succinate dehydrogenase complex assembly factor 4
SEC14L2	11730195_at	ENSG00000100003	SEC14 like lipid binding 2
SEC22B	11764116_s_at	ENSG00000265808	SEC22 homolog B, vesicle trafficking protein
SEC22B2P	11764116_s_at	ENSG00000274423	SEC22 homolog B2, pseudogene
SEC22B3P	11764116_s_at	ENSG00000275140	SEC22 homolog B3, pseudogene
SEC22B4P	11764116_s_at	ENSG00000277406	SEC22 homolog B4, pseudogene
SEC23A	11749485_x_at	ENSG00000100934	SEC23 homolog A, COPII coat complex component
SEC23IP	11725037_a_at	ENSG00000107651	SEC23 interacting protein
SEC61B	11716938_a_at	ENSG00000106803	SEC61 translocon subunit beta
SEC61G	11716223_a_at	ENSG00000132432	SEC61 translocon subunit gamma
SEMA3C	11723669_s_at	ENSG00000075223	semaphorin 3C
SERBP1	11718573_s_at	ENSG00000142864	SERPINE1 mRNA binding protein 1
SERBP1P1	11718573_s_at	ENSG00000213740	SERPINE1 mRNA binding protein 1 pseudogene 1
SFR1	11740064_a_at	ENSG00000156384	SWI5 dependent homologous recombination repair protein 1
SH3D21	11759132_at	ENSG00000214193	SH3 domain containing 21
SH3GLB1	11718846_a_at	ENSG00000097033	SH3 domain containing GRB2 like, endophilin B1
SH3GLB1	11746324_a_at	ENSG00000097033	SH3 domain containing GRB2 like, endophilin B1
SLC12A1	11752597_a_at	ENSG00000074803	solute carrier family 12 member 1
SLC12A5	11746290_a_at	ENSG00000124140	solute carrier family 12 member 5
SLC13A3	11756819_a_at	ENSG00000158296	solute carrier family 13 member 3
SLC16A13	11741421_s_at	ENSG00000174327	solute carrier family 16 member 13
SLC16A14	11725662_a_at	ENSG00000163053	solute carrier family 16 member 14
SLC22A15	11753095_a_at	ENSG00000163393	solute carrier family 22 member 15
SLC22A17	11752895_a_at	ENSG00000092096	solute carrier family 22 member 17
SLC25A4	11756367_x_at	ENSG00000151729	solute carrier family 25 member 4
SLC25A44	11746274_s_at	ENSG00000160785	solute carrier family 25 member 44
SLC2A10	11744518_a_at	ENSG00000197496	solute carrier family 2 member 10
SLC2A6	11730782_x_at	ENSG00000160326	solute carrier family 2 member 6
SLC30A2	11741579_a_at	ENSG00000158014	solute carrier family 30 member 2
SLC34A2	11758272_at	ENSG00000157765	solute carrier family 34 member 2
SLC35E1	11760592_x_at	ENSG00000127526	solute carrier family 35 member E1
SLC35E2B	11724092_s_at	ENSG00000189339	solute carrier family 35 member E2B
SLC37A3	11721864_s_at	ENSG00000157800	solute carrier family 37 member 3
SLC37A3	11761634_x_at	ENSG00000157800	solute carrier family 37 member 3
SLC38A3	11749435_a_at	ENSG00000188338	solute carrier family 38 member 3
SLC38A8	11743206_at	ENSG00000166558	solute carrier family 38 member 8
SLC43A2	11761197_x_at	ENSG00000167703	solute carrier family 43 member 2
SLC51B	11759415_at	ENSG00000186198	solute carrier family 51 subunit beta
SLC6A14	11752986_a_at	ENSG00000268104	solute carrier family 6 member 14
SLC6A8	11716740_a_at	ENSG00000130821	solute carrier family 6 member 8
SLC9C2	11752352_a_at	ENSG00000162753	solute carrier family 9 member C2 (putative)
SLITRK3	11741485_a_at	ENSG00000121871	SLIT and NTRK like family member 3
SLN	11743132_at	ENSG00000170290	sarcolipin
SMAD9	11740220_a_at	ENSG00000120693	SMAD family member 9
SMDT1	11729148_a_at	ENSG00000183172	single-pass membrane protein with aspartate rich tail 1
SMG1	11745197_s_at	ENSG00000157106	SMG1 nonsense mediated mRNA decay associated PI3K related kinase
SMG1P5	11745197_s_at	ENSG00000291266	SMG1 pseudogene 5
SMIM13	11723579_at	ENSG00000224531	small integral membrane protein 13
SMIM20	11743267_at	ENSG00000250317	small integral membrane protein 20
SMIM39	11752534_x_at	ENSG00000284479	small integral membrane protein 39
SMIM43	11726553_a_at	ENSG00000164112	small integral membrane protein 43
SMOX	11741884_a_at	ENSG00000088826	spermine oxidase
SMPD2	11723772_at	ENSG00000135587	sphingomyelin phosphodiesterase 2
SMTN	11752879_x_at	ENSG00000183963	smoothelin
SNAPC1	11734793_at	ENSG00000023608	small nuclear RNA activating complex polypeptide 1
SNAPC5	11715135_s_at	ENSG00000174446	small nuclear RNA activating complex polypeptide 5
SNF8	11735033_a_at	ENSG00000159210	SNF8 subunit of ESCRT-II
SNORA22	11763906_at	ENSG00000206634	small nucleolar RNA, H/ACA box 22
SNORA22C	11763906_at	ENSG00000207344	small nucleolar RNA, H/ACA box 22C
SNORA74B	11757123_at	ENSG00000212402	small nucleolar RNA, H/ACA box 74B
SNORD105B	11720212_a_at	ENSG00000238531	small nucleolar RNA, C/D box 105B
SNORD105B	11720213_x_at	ENSG00000238531	small nucleolar RNA, C/D box 105B
SNORD14B	200018_PM_at	ENSG00000201403	small nucleolar RNA, C/D box 14B
SNORD16	11757179_x_at	ENSG00000199673	small nucleolar RNA, C/D box 16
SNORD18A	11757179_x_at	ENSG00000200623	small nucleolar RNA, C/D box 18A
SNRPG	11753974_s_at	ENSG00000143977	small nuclear ribonucleoprotein polypeptide G
SNX3	11715738_s_at	ENSG00000112335	sorting nexin 3
SNX3	11728533_a_at	ENSG00000112335	sorting nexin 3
SNX3	200067_PM_x_at	ENSG00000112335	sorting nexin 3
SNX5	11763188_a_at	ENSG00000089006	sorting nexin 5
SOX11	11724709_s_at	ENSG00000176887	SRY-box transcription factor 11
SOX3	11735344_at	ENSG00000134595	SRY-box transcription factor 3
SP3	11723294_x_at	ENSG00000172845	Sp3 transcription factor
SPACA6	11746005_a_at	ENSG00000182310	sperm acrosome associated 6
SPACA7	11728933_at	ENSG00000153498	sperm acrosome associated 7
SPAG9	11718897_at	ENSG00000008294	sperm associated antigen 9
SPART	11730219_s_at	ENSG00000133104	spartin
SPAST	11725243_a_at	ENSG00000021574	spastin
SPATA7	11724625_a_at	ENSG00000042317	spermatogenesis associated 7
SPECC1L	11740501_a_at	ENSG00000100014	sperm antigen with calponin homology and coiled-coil domains 1 like
SPG21	11733247_a_at	ENSG00000090487	SPG21 abhydrolase domain containing, maspardin
SPPL2C	11729065_at	ENSG00000185294	signal peptide peptidase like 2C
SPTY2D1	11752921_s_at	ENSG00000179119	SPT2 chromatin protein domain containing 1
SPX	11729311_a_at	ENSG00000134548	spexin hormone
SPX	11759005_a_at	ENSG00000134548	spexin hormone
SRPK3	11750114_a_at	ENSG00000184343	SRSF protein kinase 3
SSBP1	11728760_a_at	ENSG00000106028	single stranded DNA binding protein 1
SSR3	11734069_s_at	ENSG00000114850	signal sequence receptor subunit 3
ST20	11729415_x_at	ENSG00000180953	suppressor of tumorigenicity 20
ST20-MTHFS	11729415_x_at	ENSG00000259332	ST20-MTHFS readthrough
ST3GAL1	11718737_a_at	ENSG00000008513	ST3 beta-galactoside alpha-2,3-sialyltransferase 1
STAM2	11731592_at	ENSG00000115145	signal transducing adaptor molecule 2
STARD3NL	11743398_s_at	ENSG00000010270	STARD3 N-terminal like
STEAP1	11725158_at	ENSG00000164647	STEAP family member 1
STIMATE	11736623_a_at	ENSG00000213533	STIM activating enhancer
STIMATE-MUSTN1	11736623_a_at	ENSG00000248592	STIMATE-MUSTN1 readthrough
STRA6	11733686_a_at	ENSG00000137868	signaling receptor and transporter of retinol STRA6
STRAP	11716475_a_at	ENSG00000023734	serine/threonine kinase receptor associated protein
STRAP	11751052_a_at	ENSG00000023734	serine/threonine kinase receptor associated protein
STRN3	11737168_a_at	ENSG00000196792	striatin 3
STRN3	11743882_a_at	ENSG00000196792	striatin 3
SUCLA2	11748620_x_at	ENSG00000136143	succinate-CoA ligase ADP-forming subunit beta
SUCLA2	11755266_x_at	ENSG00000136143	succinate-CoA ligase ADP-forming subunit beta
SUCLA2	11755492_a_at	ENSG00000136143	succinate-CoA ligase ADP-forming subunit beta
SUCLA2	11759519_a_at	ENSG00000136143	succinate-CoA ligase ADP-forming subunit beta
SUCLG1	11715899_a_at	ENSG00000163541	succinate-CoA ligase GDP/ADP-forming subunit alpha
SUCLG1	11754861_s_at	ENSG00000163541	succinate-CoA ligase GDP/ADP-forming subunit alpha
SUGT1	11724281_a_at	ENSG00000165416	SGT1 homolog, MIS12 kinetochore complex assembly cochaperone
SULT4A1	11724512_at	ENSG00000130540	sulfotransferase family 4A member 1
SUPT20HL2	11742235_at	ENSG00000223611	SUPT20H like 2
SUPT6H	11746726_a_at	ENSG00000109111	SPT6 homolog, histone chaperone and transcription elongation factor
SVIL2P	11750174_a_at	ENSG00000234814	supervillin family member 2, pseudogene
SYCE1L	11740463_at	ENSG00000205078	synaptonemal complex central element protein 1 like
SYCP2	11743708_at	ENSG00000196074	synaptonemal complex protein 2
SYN2	11726196_a_at	ENSG00000157152	synapsin II
SYT10	11738609_at	ENSG00000110975	synaptotagmin 10
SYT9	11745372_a_at	ENSG00000170743	synaptotagmin 9
TACR3	11737293_at	ENSG00000169836	tachykinin receptor 3
TAF6L	11747503_a_at	ENSG00000162227	TATA-box binding protein associated factor 6 like
TAF8	11736288_x_at	ENSG00000137413	TATA-box binding protein associated factor 8
TAPT1	11723832_a_at	ENSG00000169762	transmembrane anterior posterior transformation 1
TAPT1	11723833_at	ENSG00000169762	transmembrane anterior posterior transformation 1
TARBP2	11761120_at	ENSG00000139546	TARBP2 subunit of RISC loading complex
TAS2R31	11738917_x_at	ENSG00000256436	taste 2 receptor member 31
TCERG1L	11729045_a_at	ENSG00000176769	transcription elongation regulator 1 like
TCFL5	11743923_at	ENSG00000101190	transcription factor like 5
TCL6	11759621_at	ENSG00000187621	T cell leukemia/lymphoma 6
TCP10L	11724592_at	ENSG00000242220	t-complex 10 like
TECTB	11738574_at	ENSG00000119913	tectorin beta
TEN1-CDK3	11727290_a_at	ENSG00000261408	TEN1-CDK3 readthrough (NMD candidate)
TENM3-AS1	11754539_s_at	ENSG00000177822	TENM3 antisense RNA 1
THTPA	11718156_a_at	ENSG00000259431	thiamine triphosphatase
TIMM23	11720070_s_at	ENSG00000265354	translocase of inner mitochondrial membrane 23
TIPIN	11715237_s_at	ENSG00000075131	TIMELESS interacting protein
TIPRL	11735644_x_at	ENSG00000143155	TOR signaling pathway regulator
TJP2	11716742_a_at	ENSG00000119139	tight junction protein 2
TKT	11719934_a_at	ENSG00000163931	transketolase
TM7SF2	11748279_s_at	ENSG00000149809	transmembrane 7 superfamily member 2
TM7SF2	11752841_x_at	ENSG00000149809	transmembrane 7 superfamily member 2
TMEFF1	11722537_at	ENSG00000241697	transmembrane protein with EGF like and two follistatin like domains 1
TMEM100	11741049_s_at	ENSG00000166292	transmembrane protein 100
TMEM126A	11716953_at	ENSG00000171202	transmembrane protein 126A
TMEM126B	11722392_a_at	ENSG00000171204	transmembrane protein 126B
TMEM132B	11745052_a_at	ENSG00000139364	transmembrane protein 132B
TMEM167A	11757082_s_at	ENSG00000174695	transmembrane protein 167A
TMEM167AP2	11757082_s_at	ENSG00000256210	TMEM167A pseudogene 2
TMEM30B	11756750_a_at	ENSG00000182107	transmembrane protein 30B
TMEM47	11721758_at	ENSG00000147027	transmembrane protein 47
TMPO	11731918_a_at	ENSG00000120802	thymopoietin
TMPRSS11A	11740058_at	ENSG00000187054	transmembrane serine protease 11A
TMPRSS5	11756540_x_at	ENSG00000166682	transmembrane serine protease 5
TNNC1	11719268_at	ENSG00000114854	troponin C1, slow skeletal and cardiac type
TOMM6	11750093_a_at	ENSG00000214736	translocase of outer mitochondrial membrane 6
TOMM70	11757770_s_at	ENSG00000154174	translocase of outer mitochondrial membrane 70
TP53INP2	11716400_at	ENSG00000078804	tumor protein p53 inducible nuclear protein 2
TP53RK	11721486_at	ENSG00000172315	TP53 regulating kinase
TPRKB	11718886_a_at	ENSG00000144034	TP53RK binding protein
TPRKB	11718887_x_at	ENSG00000144034	TP53RK binding protein
TPRKB	11750091_a_at	ENSG00000144034	TP53RK binding protein
TPT1P8	11742408_at	ENSG00000219491	TPT1 pseudogene 8
TRAF4	11716657_at	ENSG00000076604	TNF receptor associated factor 4
TRAPPC13	11734010_a_at	ENSG00000113597	trafficking protein particle complex subunit 13
TRAPPC13	11734011_a_at	ENSG00000113597	trafficking protein particle complex subunit 13
TRAPPC13	11745069_a_at	ENSG00000113597	trafficking protein particle complex subunit 13
TREX2	11746704_x_at	ENSG00000183479	three prime repair exonuclease 2
TRH	11729494_at	ENSG00000170893	thyrotropin releasing hormone
TRIM11	11734350_a_at	ENSG00000154370	tripartite motif containing 11
TRIM39-RPP21	11755722_s_at	ENSG00000248167	TRIM39-RPP21 readthrough
TRIM64	11735870_x_at	ENSG00000204450	tripartite motif containing 64
TRIM64B	11735870_x_at	ENSG00000189253	tripartite motif containing 64B
TRIM72	11736957_x_at	ENSG00000177238	tripartite motif containing 72
TRIM77	11742492_at	ENSG00000214414	tripartite motif containing 77
TRIO	11744590_a_at	ENSG00000038382	trio Rho guanine nucleotide exchange factor
TRIT1	11724292_s_at	ENSG00000043514	tRNA isopentenyltransferase 1
TRIT1	11724293_a_at	ENSG00000043514	tRNA isopentenyltransferase 1
TRMT9B	11751654_a_at	ENSG00000250305	tRNA methyltransferase 9B (putative)
TRPC6	11736871_s_at	ENSG00000137672	transient receptor potential cation channel subfamily C member 6
TRPC6	11736872_a_at	ENSG00000137672	transient receptor potential cation channel subfamily C member 6
TRPM6	11755576_a_at	ENSG00000119121	transient receptor potential cation channel subfamily M member 6
TRUB2	11719083_x_at	ENSG00000167112	TruB pseudouridine synthase family member 2
TSGA10	11732634_a_at	ENSG00000135951	testis specific 10
TSGA10	11734278_a_at	ENSG00000135951	testis specific 10
TSPAN2	11728388_at	ENSG00000134198	tetraspanin 2
TSPO	11716614_a_at	ENSG00000100300	translocator protein
TSPO	11757058_x_at	ENSG00000100300	translocator protein
TSR1	11732143_at	ENSG00000167721	TSR1 ribosome maturation factor
TTBK1	11726879_at	ENSG00000146216	tau tubulin kinase 1
TTC38	11717467_a_at	ENSG00000075234	tetratricopeptide repeat domain 38
TTC38	11717468_s_at	ENSG00000075234	tetratricopeptide repeat domain 38
TTC38	11749884_a_at	ENSG00000075234	tetratricopeptide repeat domain 38
TTC39A	11744307_a_at	ENSG00000085831	tetratricopeptide repeat domain 39A
TTC39A	11763433_at	ENSG00000085831	tetratricopeptide repeat domain 39A
TTYH1	11720060_x_at	ENSG00000167614	tweety family member 1
TUFM	11715468_at	ENSG00000178952	Tu translation elongation factor, mitochondrial
TULP4	11750748_a_at	ENSG00000130338	TUB like protein 4
TWF1	11716945_s_at	ENSG00000151239	twinfilin actin binding protein 1
TWF1P1	11716945_s_at	ENSG00000178082	twinfilin 1 pseudogene 1
TWF1P2	11716945_s_at	ENSG00000225008	twinfilin 1 pseudogene 2
TWIST1	11727666_at	ENSG00000122691	twist family bHLH transcription factor 1
TWIST2	11759871_at	ENSG00000233608	twist family bHLH transcription factor 2
TWNK	11756456_a_at	ENSG00000107815	twinkle mtDNA helicase
TXNDC17	11757541_x_at	ENSG00000129235	thioredoxin domain containing 17
TXNDC9	11754067_a_at	ENSG00000115514	thioredoxin domain containing 9
TXNL4A	11756404_a_at	ENSG00000141759	thioredoxin like 4A
TXNRD3	11754335_a_at	ENSG00000197763	thioredoxin reductase 3
UBA5	11724536_a_at	ENSG00000081307	ubiquitin like modifier activating enzyme 5
UBE2J2	11729616_a_at	ENSG00000160087	ubiquitin conjugating enzyme E2 J2
UBE3C	11722030_a_at	ENSG00000009335	ubiquitin protein ligase E3C
UBXN10	11759101_at	ENSG00000162543	UBX domain protein 10
UBXN8	11755633_a_at	ENSG00000104691	UBX domain protein 8
UCHL5	11725084_a_at	ENSG00000116750	ubiquitin C-terminal hydrolase L5
UHRF1	11748783_a_at	ENSG00000276043	ubiquitin like with PHD and ring finger domains 1
ULBP2	11726552_x_at	ENSG00000131015	UL16 binding protein 2
UNC5D	11734195_a_at	ENSG00000156687	unc-5 netrin receptor D
UQCC2	11760174_at	ENSG00000137288	ubiquinol-cytochrome c reductase complex assembly factor 2
UQCC5	11743474_a_at	ENSG00000168273	ubiquinol-cytochrome c reductase complex assembly factor 5
UQCR11	11757334_a_at	ENSG00000127540	ubiquinol-cytochrome c reductase, complex III subunit XI
UQCRFS1	11757847_s_at	ENSG00000169021	ubiquinol-cytochrome c reductase, Rieske iron-sulfur polypeptide 1
UQCRFS1P1	11757847_s_at	ENSG00000226085	ubiquinol-cytochrome c reductase, Rieske iron-sulfur polypeptide 1 pseudogene 1
UQCRH	11759575_at	ENSG00000173660	ubiquinol-cytochrome c reductase hinge protein
UQCRQ	11733901_a_at	ENSG00000164405	ubiquinol-cytochrome c reductase complex III subunit VII
UROS	11746899_x_at	ENSG00000188690	uroporphyrinogen III synthase
USH2A	11737575_at	ENSG00000042781	usherin
USP13	11722911_at	ENSG00000058056	ubiquitin specific peptidase 13
USP14	11735994_a_at	ENSG00000101557	ubiquitin specific peptidase 14
USP27X	11743531_at	ENSG00000273820	ubiquitin specific peptidase 27 X-linked
USP3	11749740_a_at	ENSG00000140455	ubiquitin specific peptidase 3
USP8	11724334_a_at	ENSG00000138592	ubiquitin specific peptidase 8
UTP11	11756478_a_at	ENSG00000183520	UTP11 small subunit processome component
VANGL1	11724648_at	ENSG00000173218	VANGL planar cell polarity protein 1
VBP1	11743605_s_at	ENSG00000155959	VHL binding protein 1
VCL	11757769_s_at	ENSG00000035403	vinculin
VDAC1	11715655_s_at	ENSG00000213585	voltage dependent anion channel 1
VDAC1P1	11715655_s_at	ENSG00000073905	voltage dependent anion channel 1 pseudogene 1
VENTX	11732886_at	ENSG00000151650	VENT homeobox
VNN3P	11760535_at	ENSG00000293493	vanin 3, pseudogene
VPREB1	11735808_at	ENSG00000169575	V-set pre-B cell surrogate light chain 1
VPS26A	11717577_a_at	ENSG00000122958	VPS26 retromer complex component A
VPS26A	11717579_s_at	ENSG00000122958	VPS26 retromer complex component A
VPS29	11744863_a_at	ENSG00000111237	VPS29 retromer complex component
VPS29	11754042_a_at	ENSG00000111237	VPS29 retromer complex component
VPS53	11726091_at	ENSG00000141252	VPS53 subunit of GARP complex
WDR12	11746789_x_at	ENSG00000138442	WD repeat domain 12
WDR20	11725500_s_at	ENSG00000140153	WD repeat domain 20
WDR24	11747696_a_at	ENSG00000127580	WD repeat domain 24
WDR44	11726292_s_at	ENSG00000131725	WD repeat domain 44
WDR44	11726293_x_at	ENSG00000131725	WD repeat domain 44
WDR83	11721367_a_at	ENSG00000123154	WD repeat domain 83
WDR90	11760030_x_at	ENSG00000161996	WD repeat domain 90
WDSUB1	11725217_a_at	ENSG00000196151	WD repeat, sterile alpha motif and U-box domain containing 1
WNT3A	11734991_a_at	ENSG00000154342	Wnt family member 3A
WNT5B	11719442_a_at	ENSG00000111186	Wnt family member 5B
WWC2	11732393_a_at	ENSG00000151718	WW and C2 domain containing 2
XRCC2	11737882_x_at	ENSG00000196584	X-ray repair cross complementing 2
YAF2	11751495_x_at	ENSG00000015153	YY1 associated factor 2
YARS2	11720937_a_at	ENSG00000139131	tyrosyl-tRNA synthetase 2
YES1	11719415_a_at	ENSG00000176105	YES proto-oncogene 1, Src family tyrosine kinase
ZBTB4	11753768_x_at	ENSG00000174282	zinc finger and BTB domain containing 4
ZC3H13	11734803_at	ENSG00000123200	zinc finger CCCH-type containing 13
ZC3H15	11752239_a_at	ENSG00000065548	zinc finger CCCH-type containing 15
ZCCHC9	11737872_a_at	ENSG00000131732	zinc finger CCHC-type containing 9
ZFHX2-AS1	11718156_a_at	ENSG00000157306	ZFHX2 antisense RNA 1
ZFYVE27	11749452_a_at	ENSG00000155256	zinc finger FYVE-type containing 27
ZFYVE27	11750459_a_at	ENSG00000155256	zinc finger FYVE-type containing 27
ZFYVE27	11750460_x_at	ENSG00000155256	zinc finger FYVE-type containing 27
ZIC1	11731332_at	ENSG00000152977	Zic family member 1
ZIC4	11751222_a_at	ENSG00000174963	Zic family member 4
ZMPSTE24	11726600_s_at	ENSG00000084073	zinc metallopeptidase STE24
ZNF281	11759014_at	ENSG00000162702	zinc finger protein 281
ZNF3	11741003_at	ENSG00000166526	zinc finger protein 3
ZNF321P	11749609_s_at	ENSG00000213801	zinc finger protein 321, pseudogene
ZNF321P	11749609_s_at	ENSG00000293246	zinc finger protein 321, pseudogene
ZNF326	11732398_a_at	ENSG00000162664	zinc finger protein 326
ZNF354A	11725475_at	ENSG00000169131	zinc finger protein 354A
ZNF490	11737085_x_at	ENSG00000188033	zinc finger protein 490
ZNF511-PRAP1	11753654_a_at	ENSG00000283496	ZNF511-PRAP1 readthrough
ZNF556	11737640_at	ENSG00000172000	zinc finger protein 556
ZNF614	11761094_at	ENSG00000142556	zinc finger protein 614
ZNF626	11740195_at	ENSG00000188171	zinc finger protein 626
ZNF649	11731507_at	ENSG00000198093	zinc finger protein 649
ZNF66	11762213_x_at	ENSG00000160229	zinc finger protein 66
ZNF74	11748092_a_at	ENSG00000185252	zinc finger protein 74
ZNF816-ZNF321P	11749609_s_at	ENSG00000221874	ZNF816-ZNF321P readthrough
ZNG1A	11715327_x_at	ENSG00000172785	Zn regulated GTPase metalloprotein activator 1A
ZNG1B	11715327_x_at	ENSG00000136682	Zn regulated GTPase metalloprotein activator 1B
ZNG1C	11715327_x_at	ENSG00000196873	Zn regulated GTPase metalloprotein activator 1C
ZNG1E	11715327_x_at	ENSG00000147996	Zn regulated GTPase metalloprotein activator 1E
ZNG1F	11715327_x_at	ENSG00000215126	Zn regulated GTPase metalloprotein activator 1F
ZNRF4	11730426_a_at	ENSG00000105428	zinc and ring finger 4
ZSCAN12	11757925_at	ENSG00000158691	zinc finger and SCAN domain containing 12
ZSCAN2	11732052_at	ENSG00000176371	zinc finger and SCAN domain containing 2
ZYG11B	11757920_s_at	ENSG00000162378	zyg-11 family member B, cell cycle regulator
AAMDC	11733743_a_at	ENSG00000087884	adipogenesis associated Mth938 domain containing
AATK	11734091_a_at	ENSG00000181409	apoptosis associated tyrosine kinase
	11715101_s_at	ENSG00000290789	novel transcript
	11715135_s_at	ENSG00000261351	novel transcript, antisense to MAP2K1
	11715237_s_at	ENSG00000237550	ribosomal protein L9 pseudogene 9
	11715237_s_at	ENSG00000293320	novel transcript
	11715347_s_at	ENSG00000285498	TEC
	11715989_a_at	ENSG00000285641	novel protein
	11716742_a_at	ENSG00000285130	novel protein
	11717710_a_at	ENSG00000249590	novel SEC14-like 2 (S. cerevisiae) (SEC14L2) and mitochondrial protein 18 kDa (MTP18) protein
	11717892_a_at	ENSG00000285976	None
	11717902_at	ENSG00000267228	novel transcript
	11718282_s_at	ENSG00000265257	novel transcript
	11718988_s_at	ENSG00000259171	novel protein, ANG-RNASE4 readthrough
	11720060_x_at	ENSG00000268496	novel transcript, sense intronic to TTYH1
	11720077_at	ENSG00000290230	novel protein
	11721028_at	ENSG00000288849	novel transcript
	11721070_a_at	ENSG00000235546	differentially expressed in FDCP 8 homolog (DEFI8) pseudogene
	11722911_at	ENSG00000288698	novel protein
	11723640_s_at	ENSG00000259137	chromosome 11 open reading frame 58 (C11orf58) pseudogene
	11724061_s_at	ENSG00000265750	novel transcript
	11724092_s_at	ENSG00000290854	novel transcript
	11724303_a_at	ENSG00000272617	novel protein, COG8-PDF readthrough
	11725346_x_at	ENSG00000290318	novel protein
	11726335_a_at	ENSG00000286235	novel protein
	11726336_a_at	ENSG00000286235	novel protein
	11728277_x_at	ENSG00000285330	novel protein
	11728461_a_at	ENSG00000289701	novel transcript
	11728462_at	ENSG00000289701	novel transcript
	11729415_x_at	ENSG00000288604	SLAIN motif family member 2 (SLAIN2) pseudogene
	11729577_a_at	ENSG00000285505	novel protein, ATP1A3-RABAC1 readthrough
	11732743_at	ENSG00000274269	novel transcript
	11733020_s_at	ENSG00000256006	novel transcript
	11733020_s_at	ENSG00000291185	novel transcript
	11733021_x_at	ENSG00000256006	novel transcript
	11733856_s_at	ENSG00000287856	novel protein
	11735810_at	ENSG00000286396	alpha-1,4-N-acetylglucosaminyltransferase (A4GNT) pseudogene
	11735822_at	ENSG00000226025	Charcot-Leyden crystal protein pseudogene
	11737619_at	ENSG00000281613	novel ret finger protein-like 4B
	11738031_at	ENSG00000289731	novel transcript
	11738032_x_at	ENSG00000289731	novel transcript
	11741501_s_at	ENSG00000250461	family with sequence similarity 133, member B (FAM133B) pseudogene
	11741889_at	ENSG00000270790	developmental pluripotency associated 3 (DPPA3) pseudogene
	11742116_x_at	ENSG00000256006	novel transcript
	11742408_at	ENSG00000293146	novel transcript
	11742657_x_at	ENSG00000290792	novel transcript
	11742888_s_at	ENSG00000226040	glycine cleavage system protein H (aminomethyl carrier) (GCSH) pseudogene
	11743084_s_at	ENSG00000293235	novel transcript
	11743630_s_at	ENSG00000293274	novel transcript
	11744352_x_at	ENSG00000271810	novel protein, PPM1J-RHOC readthrough
	11744695_a_at	ENSG00000251017	coiled-coil domain containing 90B (CCDC90B) pseudogene
	11745197_s_at	ENSG00000288632	novel transcript
	11748629_a_at	ENSG00000288640	novel protein
	11748783_a_at	ENSG00000256663	ubiquitin-like with PHD and ring finger domains 1 (UHRF1) pseudogene
	11750093_a_at	ENSG00000124593	novel protein
	11750326_at	ENSG00000268818	novel transcript
	11754042_a_at	ENSG00000202335	None
	11754488_s_at	ENSG00000291220	novel transcript
	11756405_s_at	ENSG00000226040	glycine cleavage system protein H (aminomethyl carrier) (GCSH) pseudogene
	11757061_s_at	ENSG00000226040	glycine cleavage system protein H (aminomethyl carrier) (GCSH) pseudogene
	11757247_s_at	ENSG00000290761	novel transcript
	11757334_a_at	ENSG00000267059	novel transcript, readthrough between UQCR11 and MBD3
	11757578_x_at	ENSG00000271810	novel protein, PPM1J-RHOC readthrough
	11757581_x_at	ENSG00000259827	novel transcript
	11757936_s_at	ENSG00000224669	glycine cleavage system protein H (aminomethyl carrier) (GCSH) pseudogene
	11757936_s_at	ENSG00000260643	novel protein
	11757936_s_at	ENSG00000284512	novel protein
	11758815_a_at	ENSG00000260021	novel transcript, antisense to a novel transcript
	11759073_a_at	ENSG00000288559	novel transcript
	11759681_x_at	ENSG00000241728	novel transcript, sense overlapping C21orf2
	11761641_at	ENSG00000256028	novel transcript
	11761876_at	ENSG00000203334	novel transcript
	11762206_s_at	ENSG00000264145	dopamine receptor D5 (DRD5) pseudogene
	11762206_s_at	ENSG00000290565	novel transcript
	11762231_x_at	ENSG00000256349	novel protein
	11762938_at	ENSG00000279201	novel transcript
	11763349_at	ENSG00000261434	novel transcript, overlapping LRRC14B
	11763652_at	ENSG00000273151	novel transcript, antisense to GET4
	11764116_s_at	ENSG00000290578	novel transcript
	11764211_at	ENSG00000256273	novel transcript

## Sheet: Unique Genes
A4GNT
ABCA4
ABCC9
ABCF2
ABHD12B
ABHD5
ACAT1
ACO1
ACOT8
ACOX1
ACSL1
ACSL4
ACSS3
ACVR1C
ADAL
ADAM18
ADAT3
ADD2
ADGRE2
ADGRL1
ADGRL2
ADGRV1
ADPRHL1
AFG2A
AGTR2
AHRR
AK6
AKAP6
AKR1E2
AKTIP
ALDH1B1
ALDH3A1
ALG10
ALG10B
ALKBH1
ALPI
ALX3
AMD1
AMER2
ANAPC10
ANAPC13
ANG
ANKS6
AP1AR
AP1G1
APOB
ARG2
ARHGAP29
ARHGAP39
ARHGEF19
ARHGEF4
ARIH2OS
ARL17A
ARL17B
ARMC10
ARMC10P1
ASPG
ASPM
ASRGL1
ASS1
ASS1P1
ASS1P13
ASS1P7
ASS1P9
ASXL1
ATAD3B
ATAD5
ATG101
ATG3
ATG5
ATP13A2
ATP1A3
ATP1B3
ATP2C1
ATP5MF
ATP5MG
ATP5MK
ATP5PD
ATP6V1G2
ATP9B
ATRNL1
AVEN
AVPI1
AZI2
AZIN2
B9D1
BAIAP2L2
BAIAP3
BBS1
BCAP29
BCL2L13
BMAL1
BNIP1
BNIP3
BNIP3L
BNIP3P1
BOLA2-SMG1P6
BORCS8
BORCS8-MEF2B
BRWD1
BSPH1
BTBD6
BTF3L4
BTF3L4P1
BTF3L4P2
BZW2
C11orf54
C11orf58
C12orf56
C15orf61
C18orf32
C1QTNF5
C20orf202
C21orf58
C2orf69
C3orf52
C5orf63
C8A
C9orf72
CABLES2
CACNA1H
CACNB2
CACNB3
CALCRL
CAMK2A
CAMTA1
CAPN2
CAPZA2
CARD9
CARMIL3
CASC2
CASKIN2
CASQ2
CASZ1
CAV2
CAVIN2
CBR1
CBX2
CCDC50
CCDC62
CCDC78
CCDC83
CCDC90B
CCL4L2
CCNC
CCNI2
CCR3
CCT5
CD36
CDC73
CDCA2
CDCA8
CDH16
CDH19
CDK3
CDK8
CDKN2A-DT
CDKN2C
CDYL2
CELF3
CENPP
CENPT
CEP250
CEP44
CEP76
CERCAM
CFAP100
CFAP157
CFAP221
CFAP298-TCP10L
CFAP410
CFAP52
CFAP70
CFAP90
CFAP97
CFL2
CGRRF1
CHCHD1
CHCHD3
CHCHD3P3
CHD7
CHN2
CHORDC1
CHP1
CHPT1
CHRFAM7A
CHRM5
CHRNA10
CHRNA7
CHRNB4
CIAO3
CIBAR1
CIBAR1P1
CIMAP3
CISD1
CKAP2
CKS1B
CKS1BP2
CKS1BP3
CKS1BP6
CLCNKB
CLEC18A
CLEC18B
CLEC18C
CLRN2
CMC1
CMC4
CMTM2
CMTR2
CNIH4
CNOT9
CNTNAP3
CNTNAP3B
CNTNAP3P2
COA3
COG8
COL24A1
COLEC10
COMMD5
COPS4
COPS5
COPS9
CORO2B
CORO7-PAM16
COX20
COX20P1
COX5A
COX6A1
COX6A1P2
COX6C
COX7A2
COX7B
CPEB2
CPO
CRADD
CREB3L2
CRIPT
CRLF2
CRLS1
CRNN
CT45A10
CTBP1-DT
CTBP2
CTCFL
CTNNAL1
CTPS1
CTR9
CTSV
CTU2
CXCR2
CXCR5
CYB561D1
CYB5A
CYB5R4
CYP2W1
CYP4A22
CYP4F3
CYSRT1
CAAP1
DAD1
DAND5
DAPL1
DBNDD1
DCAF17
DCUN1D4
DDT
DDX55
DECR1
DEF8
DEFB126
DENND1A
DENND2B
DERL1
DERL2
DESI1
DHFR
DHFRP1
DLG5
DMAP1
DMKN
DNAJB9
DNAJC25
DNAJC9
DNLZ
DPH3P1
DPM1
DRD2
DRD5P1
DRD5P2
DRG1
DRP2
DSTN
DTWD1
DTWD1P1
DUS4L-BCAP29
DUSP23
DYNC1LI1
DYNC2H1
E2F6
E2F6P1
E2F6P2
E2F6P3
EDF1
EFHC2
EFNA3
EGLN1
EIF2AK4
EIF2D
EIF2S1
EIF2S2
EIF3A
EIF3J
EIF4E3
ELAC1
ELFN2
ELOC
EMC6
ENTPD8
EPHA1
EPHB1
EPS8L2
ERCC2
ERLEC1
ESRRA
ESRRAP1
ETFA
ETFBKMT
ETFRF1
ETV3
EXOC3-AS1
EXOSC4
F2
F5
FABP4
FABP5
FABP5P7
FAF2
FAM104B
FAM124B
FAM133B
FAM133CP
FAM133DP
FAM133EP
FAM133FP
FAM153CP
FAM204A
FAM210A
FAM227B
FAM8A1
FAN1
FANCD2
FANCE
FAR1
FBLN1
FBN2
FBXL5
FBXL9P
FBXO25
FBXO32
FBXO36
FBXO42
FBXO48
FCGR3A
FCGR3B
FEN1
FERMT2
FGF12
FGF2
FGFR2
FIS1
FKBP6
FKTN
FLCN
FMNL1
FOXI2
FSD2
FUT10
FUT6
FXYD2
GABRA4
GABRB2
GABRB3
GABRG2
GALNT5
GALNT9
GAN
GARIN5A
GCFC2
GCG
GCSH
GCSHP3
GCSHP5
GDE1
GDF11
GEMIN7
GFI1B
GFRA4
GGCT
GGH
GKAP1
GLRX2
GLRX5
GMCL1
GMCL2
GNA12
GNAI1
GNAZ
GNRHR2
GNRHR2P1
GOLGA3
GOLGA4
GOLPH3
GPN3
GPR137
GPR15
GPR176
GPR37
GPR37L1
GPR63
GPX1
GPX1P1
GPX1P2
GRAMD4
GREM2
GRID2IP
GRM3
GSDMD
GSTO2
GTF2E2
GTF2H2
GTF2H2B
GTF2H2C
GTF2H5
GUSBP11
H2AC10P
H2AC17
H2AC18
H2AC19
H2AC8
H2BC4
H3C8
H4C3
H4C9
HACD1
HAP1
HAUS7
HBB
HCAR1
HDAC9
HDDC3
HEATR1
HEBP2
HEPACAM2
HEY2
HIBADH
HIKESHI
HIKESHIP2
HLA-G
HM13
HNRNPH2
HOXB13
HS6ST3
HSDL2
HSP90AB5P
HSP90B1
HSP90B3P
HSPD1
HSPE1
HSPE1-MOB4
HSPE1P2
HSPH1
HTR3A
IAPP
IER3IP1
IFRD1
IFT70A
IFT81
IL31RA
IL36A
ILF3
ILRUN
ING5
INTS3
IP6K3
IPO5
IQCC
IQCJ-SCHIP1
IRAK2
IRGM
ISCA1
ISCA1P1
ISCA1P6
ISOC2
ITGA10
ITGB1BP2
JAG1
JTB
KALRN
KCNH5
KCNIP4
KCNJ14
KCNK17
KCNK9
KCNN1
KCTD15
KDM5B
KHDC1
KIF13A
KIF18B
KIF19
KIF21A
KIF2A
KIF9
KIRREL3
KLF14
KLF8
KLHDC7A
KLHL23
KLK12
KLK14
KMT2CP1
KNDC1
KPNA4
KPRP
KRCC1
KRT23
KRT27
KRT36
KRT38
KRT6A
KRT87P
KRTAP10-10
KRTAP1-1
KRTAP17-1
KRTAP19-2
KRTAP3-1
KRTAP4-12
KRTAP5-2
KRTAP5-5
KTN1
KYAT3
LACTB2
LALBA
LARP6
LCE1E
LCMT2
LCOR
LCTL
LDHA
LDHAP4
LDHAP5
LDHC
LEMD1
LENG9
LGALS1
LGALS17A
LIAT1
LIG3
LILRA6
LILRB3
LIMD1
LINC00323
LINC00494
LINC01465
LINC01522
LINC02447
LINC02687
LINC02853
LINC02899
LINGO1
LMO3
LNX2
LPL
LRRC14B
LRRK2
LUZP2
MAGEA8
MALRD1
MANF
MAOB
MAP3K19
MAPK14
MAPK8IP2
MAPK8IP3
MARCHF11
MARCHF5
MAS1
MATCAP2
MAX
MCF2
MCMBP
MCTS1
MCTS2
ME3
MED16
MED19
MED31
MED7
MEF2B
MEP1A
MESD
MET
MFAP3L
MFN1
MFN2
MFRP
MGAM
MGST2
MGST3
MIER1
MIIP
MIR1180
MIR1227
MIR17HG
MIR4721
MIR601
MIR6847
MLANA
MLYCD
MMP16
MMUT
MOG
MORC1
MORN2
MOSPD2
MOV10L1
MPP2
MRNIP
MRPL13
MRPL33
MRPL36
MRPL42
MRPL57
MRPS10
MRPS11
MRPS14
MRPS15
MRPS16
MRPS21
MRPS28
MRPS33
MRPS36
MRRF
MRS2
MSANTD3-TMEFF1
MSH2
MSMB
MSRB1
MT1F
MT1X
MTCP1
MTERF3
MTERF4
MTFP1
MTHFD1L
MTMR14
MVP-DT
MYBPC1
MYBPHL
MYDGF
MYEF2
MYH8
MYL6
MYL6B
MYLK3
MYO6
NAPEPLD
NAT8B
NCMAP
NDFIP1
NDUFA8
NDUFAF2
NDUFAF2P1
NDUFAF4
NDUFB1
NDUFB5
NDUFB6
NDUFB8
NDUFS1
NDUFV2
NDUFV2P1
NDUFV3
NEBL
NEDD4L
NENF
NEXMIF
NFIL3
NINL
NIT2
NKAIN2
NLGN4X
NLRP8
NNT
NOC2LP1
None
NOX5
NPAS2
NPC1L1
NPEPPS
NRBF2
NRBF2P4
NRG3
NSMCE2
NSUN2
NTMT1
NTNG2
NUDT15
NUDT5
NUP210P1
NUP58
NUTF2
NXPE2
NXT1
NAA50
ODF4
ODR4
OGDH
OGFOD2
OLA1
OLA1P1
OPRK1
OR10W1
OR10X1
OR10Z1
OR1D2
OR1I1
OR1J4
OR2C3
OR2T11
OR4C6
OR4E2
OR4F13P
OR4K13
OR51D1
OR5H6
OR6C4
OR6W1P
ORC4
ORC5
ORMDL3
OSBPL1A
OTUD3
OVCH1
PABIR1
PABPN1L
PAIP1
PAM16
PANK1
PAQR6
PARD6G-AS1
PBLD
PCBD2
PCDHA1
PCDHA10
PCDHA11
PCDHGA1
PCDHGA10
PCDHGA4
PCMT1
PCNX1
PDAP1
PDCD10
PDCD2
PDCD6
PDCD6-AHRR
PDE1C
PDF
PDHX
PDLIM2
PDZD7
PEG10
PENK
PGAP1
PGM1
PGM5
PGS1
PHACTR1
PHYH
PI15
PIBF1
PICK1
PIGL
PIGM
PKIB
PKN2
PLA2G12A
PLA2G3
PLA2G4A
PLAC1
PLAC4
PLCG1
PLEKHA3
PLEKHA3P1
PLEKHG4B
PLEKHJ1
PLOD2
PLXNB3
PLAAT3
PMEL
PMM1
PMM2
PMPCB
PNMA3
PNPLA8
PNPT1
POLDIP2
POLK
POLL
POLQ
POLR3H
POMP
POSTN
POU2AF2
POU4F2
PPA2
PPAN
PPAN-P2RY11
PPAT
PPATP1
PPCDC
PPIP5K2
PPP1R16B
PPP1R17
PPP1R37
PPP2R5E
PPP3CB
PRAC1
PRADC1
PRADC1P1
PRAP1
PRDX6
PRELID3B
PRICKLE4
PRKN
PROK2
PRPF18
PRR12
PRR29
PRRG2
PRSS2
PSKH2
PSMB5
PSMD12
PSMD14
PSMG1
PSMG4
PTGER3
PTP4A1
PTP4A3
PTRH2
PWWP3A
PXMP2
QKI
QSER1
R3HDM1
RAB10
RAB11A
RAB18
RAB1A
RAB2A
RAB40A
RAB9BP1
RABGGTB
RAD1
RAD23B
RAD54B
RANBP1
RANBP1P1
RANBP9
RAP1B
RAPGEF3
RASAL2
RASGRP4
RB1CC1
RBFOX3
RBM11
RBM18
RBM24
RBM44
RBMS2
RBMS2P1
RCBTB1
RDH10
REPS2
RFFL
RFPL1
RFPL2
RFPL3
RFPL4B
RFT1
RGMB
RGS7BP
RHOA
RHOC
RHOD
RILPL1
RIMS2
RMDN2
RMND1
RN7SKP124
RNASE4
RNF152
RNF220
RNF32
RNF40
RNF7
RNU6-343P
ROM1
ROMO1
ROPN1
ROPN1B
ROPN1L
RORB
RPL17-C18orf32
RPL26L1
RPL26P30
RPL37A
RPL39L
RPL4
RPL7
RPL7P1
RPL7P23
RPL7P32
RPL7P33
RPL7P37
RPL7P9
RPL9
RPL9P25
RPL9P32
RPL9P7
RPP21
RPP40
RPS13
RPS13P2
RPS6KA5
RRP8
RTL6
RTN4IP1
RWDD2A
RWDD4
RWDD4P2
S100A1
S100A8
S100A9
S1PR3
SCAF1
SCAMP4
SCFD2
SCHIP1
SCN3B
SCOC
SCRN2
SDHAF4
SEC14L2
SEC22B
SEC22B2P
SEC22B3P
SEC22B4P
SEC23A
SEC23IP
SEC61B
SEC61G
SEMA3C
SERBP1
SERBP1P1
SFR1
SH3D21
SH3GLB1
SLC12A1
SLC12A5
SLC13A3
SLC16A13
SLC16A14
SLC22A15
SLC22A17
SLC25A4
SLC25A44
SLC2A10
SLC2A6
SLC30A2
SLC34A2
SLC35E1
SLC35E2B
SLC37A3
SLC38A3
SLC38A8
SLC43A2
SLC51B
SLC6A14
SLC6A8
SLC9C2
SLITRK3
SLN
SMAD9
SMDT1
SMG1
SMG1P5
SMIM13
SMIM20
SMIM39
SMIM43
SMOX
SMPD2
SMTN
SNAPC1
SNAPC5
SNF8
SNORA22
SNORA22C
SNORA74B
SNORD105B
SNORD14B
SNORD16
SNORD18A
SNRPG
SNX3
SNX5
SOX11
SOX3
SP3
SPACA6
SPACA7
SPAG9
SPART
SPAST
SPATA7
SPECC1L
SPG21
SPPL2C
SPTY2D1
SPX
SRPK3
SSBP1
SSR3
ST20
ST20-MTHFS
ST3GAL1
STAM2
STARD3NL
STEAP1
STIMATE
STIMATE-MUSTN1
STRA6
STRAP
STRN3
SUCLA2
SUCLG1
SUGT1
SULT4A1
SUPT20HL2
SUPT6H
SVIL2P
SYCE1L
SYCP2
SYN2
SYT10
SYT9
TACR3
TAF6L
TAF8
TAPT1
TARBP2
TAS2R31
TCERG1L
TCFL5
TCL6
TCP10L
TECTB
TEN1-CDK3
TENM3-AS1
THTPA
TIMM23
TIPIN
TIPRL
TJP2
TKT
TM7SF2
TMEFF1
TMEM100
TMEM126A
TMEM126B
TMEM132B
TMEM167A
TMEM167AP2
TMEM30B
TMEM47
TMPO
TMPRSS11A
TMPRSS5
TNNC1
TOMM6
TOMM70
TP53INP2
TP53RK
TPRKB
TPT1P8
TRAF4
TRAPPC13
TREX2
TRH
TRIM11
TRIM39-RPP21
TRIM64
TRIM64B
TRIM72
TRIM77
TRIO
TRIT1
TRMT9B
TRPC6
TRPM6
TRUB2
TSGA10
TSPAN2
TSPO
TSR1
TTBK1
TTC38
TTC39A
TTYH1
TUFM
TULP4
TWF1
TWF1P1
TWF1P2
TWIST1
TWIST2
TWNK
TXNDC17
TXNDC9
TXNL4A
TXNRD3
UBA5
UBE2J2
UBE3C
UBXN10
UBXN8
UCHL5
UHRF1
ULBP2
UNC5D
UQCC2
UQCC5
UQCR11
UQCRFS1
UQCRFS1P1
UQCRH
UQCRQ
UROS
USH2A
USP13
USP14
USP27X
USP3
USP8
UTP11
VANGL1
VBP1
VCL
VDAC1
VDAC1P1
VENTX
VNN3P
VPREB1
VPS26A
VPS29
VPS53
WDR12
WDR20
WDR24
WDR44
WDR83
WDR90
WDSUB1
WNT3A
WNT5B
WWC2
XRCC2
YAF2
YARS2
YES1
ZBTB4
ZC3H13
ZC3H15
ZCCHC9
ZFHX2-AS1
ZFYVE27
ZIC1
ZIC4
ZMPSTE24
ZNF281
ZNF3
ZNF321P
ZNF326
ZNF354A
ZNF490
ZNF511-PRAP1
ZNF556
ZNF614
ZNF626
ZNF649
ZNF66
ZNF74
ZNF816-ZNF321P
ZNG1A
ZNG1B
ZNG1C
ZNG1E
ZNG1F
ZNRF4
ZSCAN12
ZSCAN2
ZYG11B
AAMDC
AATK

## Sheet: Reactome
Term	Overlap	P-value	Adjusted p-value	Odds Ratio	Combined Score	Genes
Citric Acid (TCA) Cycle And Respiratory Electron Transport R-HSA-1428517	32/163	3.14112e-09	3.85101e-06	3.85182	75.4136	COX7B;NDUFB8;NDUFB6;NDUFB5;NDUFB1;ETFA;UQCR11;COX6A1;COX5A;UQCRH;LDHC;LDHA;NNT;UQCRFS1;NDUFV3;NDUFV2;ATP5MG;ATP5MF;PDHX;NDUFA8;ATP5PD;COX6C;SUCLA2;UQCRQ;NDUFAF4;NDUFAF2;OGDH;SUCLG1;VDAC1;NDUFS1;TMEM126B;COX20
Respiratory Electron Transport, ATP Synthesis By Chemiosmotic Coupling, Heat Production By Uncoupling Proteins R-HSA-163200	24/112	5.0127e-08	2.95615e-05	4.28143	71.9653	NDUFA8;COX7B;NDUFB8;ATP5PD;NDUFB6;NDUFB5;NDUFB1;ETFA;UQCR11;COX6A1;COX6C;COX5A;UQCRH;UQCRQ;NDUFAF4;NDUFAF2;UQCRFS1;NDUFS1;TMEM126B;NDUFV3;NDUFV2;ATP5MG;ATP5MF;COX20
Respiratory Electron Transport R-HSA-611105	21/90	7.23366e-08	2.95615e-05	4.77066	78.439	NDUFA8;COX7B;NDUFB8;NDUFB6;NDUFB5;NDUFB1;ETFA;UQCR11;COX6A1;COX6C;COX5A;UQCRH;UQCRQ;NDUFAF4;NDUFAF2;UQCRFS1;NDUFS1;TMEM126B;NDUFV3;NDUFV2;COX20
PINK1-PRKN Mediated Mitophagy R-HSA-5205685	8/22	2.69112e-05	0.00824829	8.88673	93.5148	PRKN;TOMM70;MTERF3;MFN1;MFN2;VDAC1;ATG5;TOMM6
Mitochondrial Translation R-HSA-5368287	16/88	7.11781e-05	0.0174529	3.46826	33.123	MRPS15;MRPS16;MRPS14;MRPS36;MRPS11;MRPS33;MRPS10;MRPS21;MRPL36;MRPL13;MRPL57;MRPL33;TUFM;MRPL42;CHCHD1;MRRF
Mitochondrial Translation Elongation R-HSA-5389840	15/82	0.000110487	0.019351	3.49216	31.8158	MRPS15;MRPS16;MRPS14;MRPS36;MRPS11;MRPS33;MRPS10;MRPS21;MRPL36;MRPL13;MRPL57;MRPL33;TUFM;MRPL42;CHCHD1
Mitochondrial Translation Termination R-HSA-5419276	15/82	0.000110487	0.019351	3.49216	31.8158	MRPS15;MRPS16;MRPS14;MRPS36;MRPS11;MRPS33;MRPS10;MRPS21;MRPL36;MRPL13;MRPL57;MRPL33;MRPL42;CHCHD1;MRRF
Mitophagy R-HSA-5205647	8/28	0.000188632	0.0271617	6.21872	53.33	PRKN;TOMM70;MTERF3;MFN1;MFN2;VDAC1;ATG5;TOMM6
Complex I Biogenesis R-HSA-6799198	11/51	0.000199393	0.0271617	4.28146	36.479	NDUFA8;NDUFB8;NDUFB6;NDUFB5;NDUFAF4;NDUFAF2;NDUFB1;NDUFS1;TMEM126B;NDUFV3;NDUFV2
Mitochondrial Translation Initiation R-HSA-5368286	14/82	0.00039087	0.0438299	3.20858	25.1781	MRPS15;MRPS16;MRPS14;MRPS36;MRPS11;MRPS33;MRPS10;MRPS21;MRPL36;MRPL13;MRPL57;MRPL33;MRPL42;CHCHD1
Protein Localization R-HSA-9609507	22/164	0.000393254	0.0438299	2.42108	18.9838	TOMM70;FIS1;CYB5A;ACOT8;PHYH;NDUFB8;CMC4;SYCP2;PAM16;TIMM23;UBE2J2;HSPD1;CHCHD3;ACOX1;SEC61G;PXMP2;PMPCB;VDAC1;MLYCD;SEC61B;SLC25A4;TOMM6
Translation R-HSA-72766	32/281	0.000472302	0.0461161	2.01364	15.4202	RPL4;MRPS15;MRPS16;MRPS14;MRPS36;MRPS11;MRPS33;MRPS10;MRPL36;RPL9;MRPL13;MRPL57;YARS2;RPL7;MRPL33;MRPL42;SEC61G;SEC61B;CHCHD1;RPS13;RPL39L;SSR3;MRPS21;EIF2S2;EIF2S1;TUFM;PPA2;RPL37A;EIF3J;MRRF;EIF3A;RPL26L1
Regulation Of TLR By Endogenous Ligand R-HSA-5686938	6/18	0.000488996	0.0461161	7.76385	59.1851	GSDMD;S100A1;CD36;APOB;S100A9;S100A8
Mitochondrial Protein Import R-HSA-1268020	11/65	0.00172101	0.150711	3.16908	20.1707	TOMM70;NDUFB8;CHCHD3;CMC4;PAM16;PMPCB;TIMM23;VDAC1;SLC25A4;HSPD1;TOMM6
Metabolism R-HSA-1430728	152/2049	0.00498996	0.407846	1.27298	6.7472	RPL4;ISCA1;PANK1;GDE1;CCNC;NUDT5;COX6A1;RPL9;RPL7;TM7SF2;HS6ST3;GCSH;PPIP5K2;CHORDC1;MLYCD;MMUT;NUDT15;SLC25A44;RPS13;PDHX;ACOT8;PHYH;ACSL1;ENTPD8;ACSL4;SLC51B;ASRGL1;MED7;CACNB2;ALDH3A1;CACNB3;PPA2;FAR1;SUCLG1;VDAC1;TMEM126B;HACD1;PSMD12;PSMD14;MAOB;FUT10;MGST3;PLA2G3;MGST2;LPL;ABHD5;AK6;CIAO3;MRPL13;NPAS2;UQCRH;PGS1;FUT6;LDHC;LDHA;MED31;NDUFV3;PLCG1;SLC38A3;APOB;NDUFV2;ST3GAL1;ATP5MG;IP6K3;ATP5…
Alpha-Linolenic (Omega3) And Linoleic (Omega6) Acid Metabolism R-HSA-2046104	4/13	0.00622377	0.469147	6.89091	35.0015	ACOT8;SYCP2;ACSL1;ACOX1
TYSND1 Cleaves Peroxisomal Proteins R-HSA-9033500	3/7	0.0065053	0.469147	11.6219	58.5179	PHYH;SYCP2;ACOX1
ER-Phagosome Pathway R-HSA-1236974	12/89	0.00746088	0.508169	2.42355	11.8708	SEC14L2;PSMD12;PSMB5;PSMD14;S100A1;SEC61G;CD36;SEC61B;SEC22B;HLA-G;S100A9;S100A8
Muscle Contraction R-HSA-397014	21/196	0.00826287	0.533173	1.87035	8.97018	TRIM72;MYBPC1;KCNK9;CAMK2A;KCNIP4;KCNJ14;ATP1A3;MYL6B;ATP1B3;ABCC9;KCNK17;CACNA1H;CACNB2;MYL6;SLN;FXYD2;MYH8;PKN2;SCN3B;FGF12;VCL
Axonal Growth Inhibition (RHOA Activation) R-HSA-193634	3/8	0.00994139	0.583131	9.29703	42.8691	LINGO1;MCF2;RHOA
Antigen processing-Cross Presentation R-HSA-1236975	13/104	0.0102692	0.583131	2.22177	10.1726	PSMD12;PSMD14;S100A1;CTSV;HLA-G;SEC14L2;PSMB5;SEC61G;CD36;SEC61B;SEC22B;S100A9;S100A8
PPARA Activates Gene Expression R-HSA-1989781	14/116	0.0106723	0.583131	2.13517	9.69387	ESRRA;ACSL1;MED19;CCNC;MED16;NPAS2;MED7;CDK8;ACOX1;MED31;AHRR;CD36;BMAL1;DAND5
Selective Autophagy R-HSA-9663891	9/61	0.0109397	0.583131	2.68843	12.1392	TOMM70;PRKN;DYNC1LI1;MTERF3;MFN1;MFN2;VDAC1;ATG5;TOMM6
Regulation Of Lipid Metabolism By PPARalpha R-HSA-400206	14/118	0.0123063	0.612765	2.09388	9.20815	ESRRA;ACSL1;MED19;CCNC;MED16;NPAS2;MED7;CDK8;ACOX1;MED31;AHRR;CD36;BMAL1;DAND5
tRNA Modification In Nucleus And Cytosol R-HSA-6782315	7/42	0.0124952	0.612765	3.1043	13.6043	TRMT9B;CTU2;TP53RK;NSUN2;LCMT2;ADAT3;TRIT1
Ion Transport By P-type ATPases R-HSA-936837	8/53	0.0140362	0.623732	2.7602	11.7753	SLN;FXYD2;CAMK2A;ATP1A3;ATP1B3;ATP13A2;ATP2C1;ATP9B
RHO GTPases Activate Rhotekin And Rhophilins R-HSA-5666185	3/9	0.0142451	0.623732	7.74711	32.9356	RHOC;RHOA;ROPN1
p75NTR Regulates Axonogenesis R-HSA-193697	3/9	0.0142451	0.623732	7.74711	32.9356	LINGO1;MCF2;RHOA
Pyruvate Metabolism And Citric Acid (TCA) Cycle R-HSA-71406	8/54	0.015626	0.660604	2.70005	11.229	LDHC;PDHX;LDHA;SUCLA2;NNT;OGDH;SUCLG1;VDAC1
MyD88 Deficiency (TLR2/4) R-HSA-5602498	4/17	0.0170643	0.674866	4.76961	19.416	S100A1;CD36;S100A9;S100A8
Platelet Sensitization By LDL R-HSA-432142	4/17	0.0170643	0.674866	4.76961	19.416	PPP2R5E;PLA2G4A;MAPK14;APOB
WNT Ligand Biogenesis And Trafficking R-HSA-3238698	5/26	0.0185434	0.710443	3.69225	14.7234	SNX3;VPS29;WNT5B;WNT3A;VPS26A
Acyl Chain Remodelling Of PG R-HSA-1482925	4/18	0.0209076	0.733352	4.42869	17.1286	PLA2G12A;PLA2G3;PLA2G4A;CRLS1
IRAK4 Deficiency (TLR2/4) R-HSA-5603041	4/18	0.0209076	0.733352	4.42869	17.1286	S100A1;CD36;S100A9;S100A8
Macroautophagy R-HSA-1632852	13/114	0.0209358	0.733352	2.00072	7.73539	TOMM70;PRKN;ATG3;MTERF3;MTMR14;DYNC1LI1;ATG101;RB1CC1;MFN1;MFN2;VDAC1;ATG5;TOMM6
Acyl Chain Remodelling Of PC R-HSA-1482788	5/27	0.0216498	0.737295	3.52423	13.5075	PLA2G12A;PNPLA8;PLA2G3;PLA2G4A;PLAAT3
Formation Of RNA Pol II Elongation Complex R-HSA-112382	8/58	0.0232973	0.771958	2.48351	9.33657	CTR9;ERCC2;ELOC;DMAP1;GTF2H2;SUPT6H;CDC73;GTF2H5
Beta-oxidation Of Very Long Chain Fatty Acids R-HSA-390247	3/11	0.0255464	0.824207	5.80972	21.3057	ACOT8;ACOX1;MLYCD
Acyl Chain Remodelling Of PE R-HSA-1482839	5/29	0.0288301	0.883642	3.2302	11.4554	PLA2G12A;PNPLA8;PLA2G3;PLA2G4A;PLAAT3
Peroxisomal Lipid Metabolism R-HSA-390918	5/29	0.0288301	0.883642	3.2302	11.4554	ACOT8;PHYH;SYCP2;ACOX1;MLYCD
L13a-mediated Translational Silencing Of Ceruloplasmin Expression R-HSA-156827	12/108	0.0308894	0.915864	1.94192	6.7527	RPL4;RPL39L;RPL37A;EIF3J;EIF2S2;RPL9;MRPL13;EIF2S1;RPS13;EIF3A;RPL26L1;RPL7
Miscellaneous Substrates R-HSA-211958	3/12	0.0325538	0.915864	5.16392	17.6857	CYP2W1;CYP4A22;CYP4F3
Synthesis Of GDP-mannose R-HSA-446205	2/5	0.0326033	0.915864	10.3226	35.3378	PMM1;PMM2
GTP Hydrolysis And Joining Of 60S Ribosomal Subunit R-HSA-72706	12/109	0.0328695	0.915864	1.92179	6.56333	RPL4;RPL39L;RPL37A;EIF3J;EIF2S2;RPL9;MRPL13;EIF2S1;RPS13;EIF3A;RPL26L1;RPL7
RHOG GTPase Cycle R-HSA-9013408	9/74	0.0347943	0.923781	2.14925	7.21784	VANGL1;TRIO;MCF2;ARHGAP39;PKN2;HSPE1;KALRN;TMPO;KTN1
Response Of EIF2AK4 (GCN2) To Amino Acid Deficiency R-HSA-9633012	11/98	0.0353864	0.923781	1.96355	6.56106	RPL4;RPL39L;RPL37A;EIF2AK4;EIF2S2;RPL9;MRPL13;EIF2S1;RPS13;RPL26L1;RPL7
Citric Acid Cycle (TCA Cycle) R-HSA-71403	4/21	0.0354141	0.923781	3.64657	12.1819	SUCLA2;NNT;OGDH;SUCLG1
Golgi-to-ER Retrograde Transport R-HSA-8856688	12/112	0.0393512	0.998968	1.86384	6.02995	DYNC1LI1;RAB1A;KIF9;KIF18B;KIF19;KIF2A;CAPZA2;BNIP1;RAB18;PLA2G4A;KIF21A;SEC22B
Diseases Associated With Visual Transduction R-HSA-2474795	3/13	0.0404528	0.998968	4.64728	14.9067	ABCA4;NAPEPLD;STRA6
Insertion Of Tail-Anchored Proteins Into Endoplasmic Reticulum Membrane R-HSA-9609523	4/22	0.0412678	0.998968	3.4438	10.9777	CYB5A;SEC61G;SEC61B;UBE2J2
Cardiac Conduction R-HSA-5576891	13/126	0.0427048	0.998968	1.78711	5.63555	KCNK9;CAMK2A;KCNIP4;KCNJ14;ATP1A3;ATP1B3;ABCC9;KCNK17;CACNB2;SLN;FXYD2;SCN3B;FGF12
Smooth Muscle Contraction R-HSA-445355	6/43	0.0442314	0.998968	2.51465	7.8415	TRIM72;MYL6;MYL6B;PKN2;CACNA1H;VCL
Metal Sequestration By Antimicrobial Proteins R-HSA-6799990	2/6	0.0469587	0.998968	7.74155	23.6774	S100A9;S100A8
Protein Repair R-HSA-5676934	2/6	0.0469587	0.998968	7.74155	23.6774	PCMT1;MSRB1
Scavenging By Class B Receptors R-HSA-3000471	2/6	0.0469587	0.998968	7.74155	23.6774	CD36;APOB
Scavenging By Class F Receptors R-HSA-3000484	2/6	0.0469587	0.998968	7.74155	23.6774	HSPH1;APOB
Autophagy R-HSA-9612973	13/128	0.0474751	0.998968	1.75584	5.35101	TOMM70;PRKN;ATG3;MTERF3;MTMR14;DYNC1LI1;ATG101;RB1CC1;MFN1;MFN2;VDAC1;ATG5;TOMM6
Canonical Retinoid Cycle In Rods (Twilight Vision) R-HSA-2453902	4/23	0.0476349	0.998968	3.26238	9.93129	RDH10;ABCA4;NAPEPLD;STRA6
Cap-dependent Translation Initiation R-HSA-72737	12/116	0.0493191	0.998968	1.79177	5.39223	RPL4;RPL39L;RPL37A;EIF3J;EIF2S2;RPL9;MRPL13;EIF2S1;RPS13;EIF3A;RPL26L1;RPL7
E3 Ubiquitin Ligases Ubiquitinate Target Proteins R-HSA-8866654	7/56	0.0519367	0.998968	2.2157	6.55346	CTR9;H2BC4;DERL1;UBE2J2;RNF152;CDC73;RNF40
RNA Polymerase II Pre-transcription Events R-HSA-674695	9/80	0.0531355	0.998968	1.967	5.77296	CTR9;ERCC2;ELOC;DMAP1;GTF2H2;SUPT6H;CDC73;GTF2E2;GTF2H5
Diseases Associated With Glycosylation Precursor Biosynthesis R-HSA-5609975	3/15	0.0588322	0.998968	3.87232	10.9705	DPM1;PMM2;PGM1
EPHA-mediated Growth Cone Collapse R-HSA-3928663	3/15	0.0588322	0.998968	3.87232	10.9705	MYL6;YES1;RHOA
Cation-coupled Chloride Cotransporters R-HSA-426117	2/7	0.0631401	0.998968	6.19291	17.1073	SLC12A5;SLC12A1
Phosphate Bond Hydrolysis By NUDT Proteins R-HSA-2393930	2/7	0.0631401	0.998968	6.19291	17.1073	NUDT15;NUDT5
RHOT2 GTPase Cycle R-HSA-9013419	2/7	0.0631401	0.998968	6.19291	17.1073	MFN1;MFN2
Vitamin C (Ascorbate) Metabolism R-HSA-196836	2/7	0.0631401	0.998968	6.19291	17.1073	CYB5A;GSTO2
RHOA GTPase Cycle R-HSA-8980692	14/147	0.0635042	0.998968	1.63478	4.50651	TRIO;MCF2;FAF2;ARHGEF19;ARHGAP29;ARHGAP39;KALRN;RHOA;KTN1;VANGL1;ARHGEF4;PKN2;TMPO;TJP2
SRP-dependent Cotranslational Protein Targeting To Membrane R-HSA-1799339	11/108	0.0636034	0.998968	1.76018	4.84945	RPL4;RPL39L;SEC61G;SSR3;RPL37A;SEC61B;RPL9;MRPL13;RPS13;RPL26L1;RPL7
Transcriptional Regulation Of White Adipocyte Differentiation R-HSA-381340	9/84	0.0683317	0.998968	1.86169	4.99563	CDK8;FABP4;MED31;MED19;LPL;CCNC;CD36;MED16;MED7
Formation Of ATP By Chemiosmotic Coupling R-HSA-163210	3/16	0.0692485	0.998968	3.57426	9.54346	ATP5PD;ATP5MG;ATP5MF
Formation Of A Pool Of Free 40S Subunits R-HSA-72689	10/98	0.0738563	0.998968	1.7632	4.59426	RPL4;RPL39L;RPL37A;EIF3J;RPL9;MRPL13;RPS13;EIF3A;RPL26L1;RPL7
RHOC GTPase Cycle R-HSA-9013106	8/73	0.0745539	0.998968	1.90886	4.95586	VANGL1;MCF2;ARHGAP39;PKN2;RHOC;RHOA;TMPO;TJP2
Netrin-1 Signaling R-HSA-373752	6/49	0.0750182	0.998968	2.16308	5.60243	TRIO;TRPC6;UNC5D;PLCG1;RGMB;MAPK14
Acyl Chain Remodelling Of PI R-HSA-1482922	3/17	0.0804308	0.998968	3.31878	8.3645	PLA2G12A;PLA2G4A;PLAAT3
Metabolism Of Folate And Pterines R-HSA-196757	3/17	0.0804308	0.998968	3.31878	8.3645	DHFR;MTHFD1L;ST20-MTHFS
CDC6 Association With ORC:origin Complex R-HSA-68689	2/8	0.080873	0.998968	5.16048	12.978	ORC5;ORC4
Coenzyme A Biosynthesis R-HSA-196783	2/8	0.080873	0.998968	5.16048	12.978	PANK1;PPCDC
Miro GTPase Cycle R-HSA-9715370	2/8	0.080873	0.998968	5.16048	12.978	MFN1;MFN2
Recycling Of eIF2:GDP R-HSA-72731	2/8	0.080873	0.998968	5.16048	12.978	EIF2S2;EIF2S1
RAB Geranylgeranylation R-HSA-8873719	7/62	0.0810202	0.998968	1.97336	4.95916	RAB2A;RAB10;RAB1A;RAB40A;RAB18;RABGGTB;RAB11A
Ion Homeostasis R-HSA-5578775	6/50	0.0810903	0.998968	2.11381	5.31028	SLN;FXYD2;CAMK2A;ATP1A3;ABCC9;ATP1B3
Class I MHC Mediated Antigen Processing And Presentation R-HSA-983169	30/378	0.0815345	0.998968	1.34126	3.36218	PRKN;ANAPC13;PSMD12;SEC23A;UBE3C;PSMD14;UBA5;NEDD4L;CTSV;RNF7;UBE2J2;ANAPC10;SEC14L2;NPEPPS;PSMB5;SEC61G;CD36;ELOC;SEC61B;S100A1;BTBD6;FBXO32;HLA-G;GAN;FBXL5;SEC22B;S100A9;TRIM11;S100A8;RNF220
Cellular Response To Starvation R-HSA-9711097	14/153	0.0822687	0.998968	1.56371	3.90578	RPL4;RPL39L;ATP6V1G2;EIF2AK4;EIF2S2;RPL9;MRPL13;EIF2S1;WDR24;RPL7;FLCN;RPL37A;RPS13;RPL26L1
Intra-Golgi And Retrograde Golgi-to-ER Traffic R-HSA-6811442	16/181	0.0847516	0.998968	1.5059	3.71661	RAB1A;SCOC;COG8;PLA2G4A;DYNC1LI1;GOLGA4;KIF9;KIF18B;KIF19;KIF2A;VPS53;CAPZA2;BNIP1;RAB18;KIF21A;SEC22B
RHOU GTPase Cycle R-HSA-9013420	5/39	0.0855024	0.998968	2.27893	5.60436	VANGL1;DLG5;MYO6;PKN2;STAM2
ABC-family Proteins Mediated Transport R-HSA-382556	10/102	0.0909136	0.998968	1.68618	4.0432	ERLEC1;PSMD12;PSMB5;PSMD14;ABCA4;DERL1;DERL2;ABCC9;EIF2S2;EIF2S1
Nervous System Development R-HSA-9675108	41/545	0.0923386	0.998968	1.26673	3.01773	RPL4;PSMD12;TRIO;PSMD14;ARHGAP39;RPL9;MRPL13;KALRN;CACNA1H;RPL7;DRP2;PPP3CB;PSMB5;RPS6KA5;PLCG1;ELOC;SCN3B;EPHB1;RPS13;RPL39L;ADGRV1;TRPC6;YES1;RANBP9;UNC5D;RGMB;RHOC;MAPK14;RHOA;GFRA4;CACNB2;MYL6;CACNB3;EFNA3;ITGA10;RPL37A;PXMP2;PLXNB3;PKN2;EPHA1;RPL26L1
Cristae Formation R-HSA-8949613	4/29	0.0963032	0.998968	2.47861	5.80058	CHCHD3;ATP5PD;ATP5MG;ATP5MF
Beta-oxidation Of pristanoyl-CoA R-HSA-389887	2/9	0.0999096	0.998968	4.42304	10.1884	ACOT8;SYCP2
Chylomicron Remodeling R-HSA-8963901	2/9	0.0999096	0.998968	4.42304	10.1884	LPL;APOB
E2F-enabled Inhibition Of Pre-Replication Complex Formation R-HSA-113507	2/9	0.0999096	0.998968	4.42304	10.1884	ORC5;ORC4
COPI-dependent Golgi-to-ER Retrograde Traffic R-HSA-6811434	8/78	0.100456	0.998968	1.77204	4.07223	RAB1A;KIF9;KIF19;KIF18B;KIF2A;BNIP1;KIF21A;SEC22B
G Alpha (12/13) Signaling Events R-HSA-416482	8/78	0.100456	0.998968	1.77204	4.07223	TRIO;MCF2;GNA12;ARHGEF19;ARHGEF4;RHOC;KALRN;RHOA
Fatty Acid Metabolism R-HSA-8978868	15/173	0.10489	0.998968	1.47366	3.32286	CBR1;ACOT8;PHYH;HACD1;GPX1;SYCP2;ACSL1;CYP4F3;CYP4A22;PLA2G4A;ACSL4;ACOX1;MLYCD;MMUT;DECR1
Phase 4 - Resting Membrane Potential R-HSA-5576886	3/19	0.104916	0.998968	2.90362	6.54649	KCNK9;KCNJ14;KCNK17
RHO GTPases Activate ROCKs R-HSA-5627117	3/19	0.104916	0.998968	2.90362	6.54649	MYL6;RHOC;RHOA
RHO GTPases Activate CIT R-HSA-5625900	3/19	0.104916	0.998968	2.90362	6.54649	MYL6;RHOC;RHOA
tRNA Processing R-HSA-72306	10/105	0.10513	0.998968	1.63267	3.67769	TRMT9B;CTU2;TP53RK;NSUN2;RPP40;RPP21;LCMT2;NUP58;ADAT3;TRIT1
Kinesins R-HSA-983189	5/42	0.109238	0.998968	2.09381	4.63618	KIF9;KIF19;KIF18B;KIF2A;KIF21A
RAC3 GTPase Cycle R-HSA-9013423	9/93	0.111552	0.998968	1.66143	3.64394	VANGL1;TRIO;JAG1;MCF2;SLITRK3;ARHGAP39;PKN2;FERMT2;TMPO
Cellular Responses To Stimuli R-HSA-8953897	53/736	0.112108	0.998968	1.20886	2.64534	RPL4;COX7B;H2AC19;HIKESHI;MT1X;LIMD1;COX6A1;RPL9;RPL7;MYDGF;FLCN;CREB3L2;ELOC;RPS13;VENTX;GPX1;ATP6V1G2;DYNC1LI1;RPL37A;MT1F;TKT;NUP58;PSMD12;PSMD14;HM13;CAMK2A;MRPL13;WDR24;COX5A;ANAPC10;NPAS2;HSP90B1;HSPH1;PSMB5;EXOSC4;DNAJB9;APOB;EGLN1;RPL39L;CDKN2C;CBX2;H2BC4;EIF2AK4;COX6C;EIF2S2;MAPK14;EIF2S1;CAPZA2;NOX5;BMAL1;DAND5;RPL26L1;COX20
Ion Channel Transport R-HSA-983712	15/175	0.112609	0.998968	1.45508	3.17764	ATP6V1G2;TRPC6;TTYH1;CAMK2A;CLCNKB;NEDD4L;ATP1A3;ATP1B3;ATP2C1;SLC9C2;SLN;FXYD2;ATP13A2;TRPM6;ATP9B
Diseases Associated With TLR Signaling Cascade R-HSA-5602358	4/31	0.116232	0.998968	2.29477	4.93873	S100A1;CD36;S100A9;S100A8
Glyoxylate Metabolism And Glycine Degradation R-HSA-389661	4/31	0.116232	0.998968	2.29477	4.93873	GCSH;PDHX;PXMP2;OGDH
Pyruvate Metabolism R-HSA-70268	4/31	0.116232	0.998968	2.29477	4.93873	LDHC;PDHX;LDHA;VDAC1
Sema4D Induced Cell Migration And Growth-Cone Collapse R-HSA-416572	3/20	0.118123	0.998968	2.73267	5.83706	MYL6;RHOC;RHOA
Calcitonin-like Ligand Receptors R-HSA-419812	2/10	0.120026	0.998968	3.86995	8.20447	CALCRL;IAPP
RHO GTPases Activate KTN1 R-HSA-5625970	2/10	0.120026	0.998968	3.86995	8.20447	RHOA;KTN1
Role Of Second Messengers In Netrin-1 Signaling R-HSA-418890	2/10	0.120026	0.998968	3.86995	8.20447	TRPC6;PLCG1
Synthesis Of Pyrophosphates In Cytosol R-HSA-1855167	2/10	0.120026	0.998968	3.86995	8.20447	PPIP5K2;IP6K3
Urea Cycle R-HSA-70635	2/10	0.120026	0.998968	3.86995	8.20447	ARG2;ASS1
Phase 0 - Rapid Depolarisation R-HSA-5576892	4/32	0.126816	0.998968	2.21269	4.56925	CACNB2;CAMK2A;SCN3B;FGF12
Major Pathway Of rRNA Processing In Nucleolus And Cytosol R-HSA-6791226	15/179	0.129037	0.998968	1.41928	2.90621	RPL4;RPL39L;UTP11;RPP40;HEATR1;WDR12;RPL9;MRPL13;RPL7;EXOSC4;RPL37A;RPP21;TSR1;RPS13;RPL26L1
Cytoprotection By HMOX1 R-HSA-9707564	6/57	0.130837	0.998968	1.82299	3.70761	COX7B;HM13;COX6A1;COX6C;COX5A;COX20
Axon Guidance R-HSA-422475	38/519	0.134118	0.998968	1.22859	2.46829	RPL4;PSMD12;TRIO;PSMD14;ARHGAP39;RPL9;MRPL13;KALRN;CACNA1H;RPL7;PPP3CB;PSMB5;RPS6KA5;PLCG1;ELOC;SCN3B;EPHB1;RPS13;RPL39L;TRPC6;YES1;RANBP9;UNC5D;RGMB;RHOC;MAPK14;RHOA;GFRA4;CACNB2;MYL6;CACNB3;EFNA3;ITGA10;RPL37A;PLXNB3;PKN2;EPHA1;RPL26L1
Digestion Of Dietary Carbohydrate R-HSA-189085	2/11	0.141022	0.998968	3.43977	6.73797	PMEL;MGAM
Endosomal/Vacuolar Pathway R-HSA-1236977	2/11	0.141022	0.998968	3.43977	6.73797	CTSV;HLA-G
Free Fatty Acids Regulate Insulin Secretion R-HSA-400451	2/11	0.141022	0.998968	3.43977	6.73797	ACSL4;CD36
Highly Calcium Permeable Postsynaptic Nicotinic Acetylcholine Receptors R-HSA-629594	2/11	0.141022	0.998968	3.43977	6.73797	CHRNB4;CHRFAM7A
Metallothioneins Bind Metals R-HSA-5661231	2/11	0.141022	0.998968	3.43977	6.73797	MT1F;MT1X
Regulation Of Signaling By NODAL R-HSA-1433617	2/11	0.141022	0.998968	3.43977	6.73797	ACVR1C;DAND5
Acyl Chain Remodelling Of PS R-HSA-1482801	3/22	0.14622	0.998968	2.44476	4.70041	PLA2G12A;PLA2G4A;PLAAT3
Mitochondrial Calcium Ion Transport R-HSA-8949215	3/22	0.14622	0.998968	2.44476	4.70041	SMDT1;PMPCB;VDAC1
Cellular Responses To Stress R-HSA-2262752	51/722	0.146407	0.998968	1.18279	2.27258	RPL4;COX7B;H2AC19;HIKESHI;LIMD1;COX6A1;RPL9;RPL7;MYDGF;FLCN;CREB3L2;ELOC;RPS13;VENTX;GPX1;ATP6V1G2;DYNC1LI1;RPL37A;TKT;NUP58;PSMD12;PSMD14;HM13;CAMK2A;MRPL13;WDR24;COX5A;ANAPC10;NPAS2;HSP90B1;HSPH1;PSMB5;EXOSC4;DNAJB9;APOB;EGLN1;RPL39L;CDKN2C;CBX2;H2BC4;EIF2AK4;COX6C;EIF2S2;MAPK14;EIF2S1;CAPZA2;NOX5;BMAL1;DAND5;RPL26L1;COX20
COPI-independent Golgi-to-ER Retrograde Traffic R-HSA-6811436	4/34	0.149124	0.998968	2.06496	3.92957	DYNC1LI1;CAPZA2;RAB18;PLA2G4A
Peptide Chain Elongation R-HSA-156902	8/86	0.150984	0.998968	1.58962	3.0053	RPL4;RPL39L;RPL37A;RPL9;MRPL13;RPS13;RPL26L1;RPL7
rRNA Processing R-HSA-72312	16/199	0.154197	0.998968	1.35647	2.53595	RPL4;RPL39L;UTP11;MTERF4;HEATR1;RPP40;WDR12;RPL9;MRPL13;RPL7;EXOSC4;RPL37A;RPP21;TSR1;RPS13;RPL26L1
Defective CFTR Causes Cystic Fibrosis R-HSA-5678895	6/60	0.155764	0.998968	1.72144	3.20087	ERLEC1;PSMD12;PSMB5;PSMD14;DERL1;DERL2
BBSome-mediated Cargo-Targeting To Cilium R-HSA-5620922	3/23	0.161008	0.998968	2.3224	4.24141	BBS1;SMOX;CCT5
Cytosolic Iron-Sulfur Cluster Assembly R-HSA-2564830	2/12	0.162715	0.998968	3.09563	5.6209	ERCC2;CIAO3
Eicosanoids R-HSA-211979	2/12	0.162715	0.998968	3.09563	5.6209	CYP4A22;CYP4F3
HDR Thru MMEJ (alt-NHEJ) R-HSA-5685939	2/12	0.162715	0.998968	3.09563	5.6209	FEN1;POLK
Josephin Domain DUBs R-HSA-5689877	2/12	0.162715	0.998968	3.09563	5.6209	PRKN;RAD23B
PECAM1 Interactions R-HSA-210990	2/12	0.162715	0.998968	3.09563	5.6209	YES1;PLCG1
Pregnenolone Biosynthesis R-HSA-196108	2/12	0.162715	0.998968	3.09563	5.6209	STARD3NL;TSPO
Presynaptic Depolarization And Calcium Channel Opening R-HSA-112308	2/12	0.162715	0.998968	3.09563	5.6209	CACNB2;CACNB3
Tandem Pore Domain Potassium Channels R-HSA-1296346	2/12	0.162715	0.998968	3.09563	5.6209	KCNK9;KCNK17
Developmental Biology R-HSA-1266738	73/1073	0.167844	0.998968	1.13687	2.02899	RPL4;TRIO;H2AC19;MED19;KRT23;CCNC;ARHGAP39;MED16;RPL9;RPL7;PPP3CB;RPS6KA5;KRT27;KRTAP5-2;CD36;ELOC;KRTAP3-1;EPHB1;KRTAP1-1;RPS13;KRT6A;PDHX;MEF2B;ADGRV1;TRPC6;KRTAP17-1;KRTAP19-2;UNC5D;RGMB;LCE1E;RHOC;RHOA;MED7;GFRA4;CACNB2;MYL6;CACNB3;KRT38;RPL37A;KRT36;IAPP;EPHA1;PSMD12;PSMD14;KRTAP10-10;LPL;MRPL13;KALRN;CACNA1H;DRP2;PSMB5;ACVR1C;MED31;PLCG1;SCN3B;SPAG9;RPL39L;YES1;H2BC4;KLK14;RANBP9;MAPK14;KLK…
Mitochondrial Biogenesis R-HSA-1592230	8/89	0.172592	0.998968	1.5305	2.68881	ESRRA;CHCHD3;ATP5PD;TWNK;SSBP1;MAPK14;ATP5MG;ATP5MF
Glutathione Conjugation R-HSA-156590	4/36	0.172803	0.998968	1.93569	3.39831	GGCT;GSTO2;MGST3;MGST2
RHO GTPases Activate PKNs R-HSA-5625740	6/62	0.173451	0.998968	1.65978	2.90771	MYL6;H2BC4;H2AC19;PKN2;RHOC;RHOA
TP53 Regulates Transcription Of DNA Repair Genes R-HSA-6796648	6/62	0.173451	0.998968	1.65978	2.90771	MSH2;FANCD2;ERCC2;ELOC;GTF2H2;GTF2H5
Signaling By ERBB2 R-HSA-1227986	5/49	0.175138	0.998968	1.76005	3.06633	USP8;YES1;NRG3;PLCG1;RHOA
rRNA Processing In Nucleus And Cytosol R-HSA-8868773	15/189	0.175684	0.998968	1.337	2.32513	RPL4;RPL39L;UTP11;RPP40;HEATR1;WDR12;RPL9;MRPL13;RPL7;EXOSC4;RPL37A;RPP21;TSR1;RPS13;RPL26L1
RHO GTPases Activate NADPH Oxidases R-HSA-5668599	3/24	0.176221	0.998968	2.21169	3.83953	MAPK14;S100A9;S100A8
Sema4D In Semaphorin Signaling R-HSA-400685	3/24	0.176221	0.998968	2.21169	3.83953	MYL6;RHOC;RHOA
Synthesis Of Very Long-Chain Fatty acyl-CoAs R-HSA-75876	3/24	0.176221	0.998968	2.21169	3.83953	HACD1;ACSL1;ACSL4
Protein Ubiquitination R-HSA-8852135	7/76	0.177976	0.998968	1.57179	2.71308	CTR9;H2BC4;DERL1;UBE2J2;RNF152;CDC73;RNF40
Eukaryotic Translation Elongation R-HSA-156842	8/90	0.180089	0.998968	1.51175	2.5916	RPL4;RPL39L;RPL37A;RPL9;MRPL13;RPS13;RPL26L1;RPL7
Eukaryotic Translation Termination R-HSA-72764	8/90	0.180089	0.998968	1.51175	2.5916	RPL4;RPL39L;RPL37A;RPL9;MRPL13;RPS13;RPL26L1;RPL7
Selenocysteine Synthesis R-HSA-2408557	8/90	0.180089	0.998968	1.51175	2.5916	RPL4;RPL39L;RPL37A;RPL9;MRPL13;RPS13;RPL26L1;RPL7
Viral mRNA Translation R-HSA-192823	8/90	0.180089	0.998968	1.51175	2.5916	RPL4;RPL39L;RPL37A;RPL9;MRPL13;RPS13;RPL26L1;RPL7
Transport Of Small Molecules R-HSA-382551	49/706	0.182845	0.998968	1.15953	1.97018	MRS2;SLC2A6;SLC9C2;SLC22A15;SLN;SLC22A17;PMPCB;SLC34A2;SLC13A3;TRPC6;ATP6V1G2;SLC2A10;SLC30A2;SLC6A14;ATP1B3;ABCC9;SMDT1;VDAC1;SLC25A4;PSMD12;SLC43A2;PSMD14;TTYH1;CAMK2A;CLCNKB;DERL1;NEDD4L;DERL2;LPL;ATP1A3;ATP2C1;ADD2;ERLEC1;CYB5R4;PSMB5;SLC38A3;APOB;ATP9B;TRPM6;SLC12A5;ABCA4;SLC12A1;EIF2S2;EIF2S1;RAB11A;FXYD2;ACO1;ATP13A2;FBXL5
Deubiquitination R-HSA-5688426	21/279	0.182881	0.998968	1.26299	2.14572	TOMM70;PRKN;USP13;USP8;USP14;PSMD12;PSMD14;USP3;H2BC4;H2AC19;WDR20;RAD23B;RHOA;UCHL5;SNX3;ASXL1;PSMB5;PTRH2;VDAC1;STAM2;OTUD3
Signaling By Rho GTPases, Miro GTPases And RHOBTB3 R-HSA-9716542	46/660	0.183898	0.998968	1.16454	1.972	TRIO;FAF2;H2AC19;MOSPD2;CDCA8;TWF1;ARHGAP39;RASAL2;KALRN;GOLGA3;BAIAP2L2;PPP2R5E;MYO6;SLITRK3;PLEKHG4B;MFN1;MFN2;TMPO;CENPT;JAG1;MCF2;H2BC4;ARHGEF19;ARHGAP29;RHOC;HSPE1;MAPK14;RHOD;RHOA;KTN1;VANGL1;COPS4;DYNC1LI1;MYL6;FMNL1;KIF2A;DLG5;ARHGEF4;PKN2;CENPP;S100A9;STAM2;FERMT2;S100A8;ROPN1;TJP2
Mitochondrial Iron-Sulfur Cluster Biogenesis R-HSA-1362409	2/13	0.184945	0.998968	2.81406	4.74928	ISCA1;GLRX5
Trafficking And Processing Of Endosomal TLR R-HSA-1679131	2/13	0.184945	0.998968	2.81406	4.74928	CTSV;HSP90B1
NCAM1 Interactions R-HSA-419037	4/37	0.185099	0.998968	1.87694	3.16614	CACNB2;CACNB3;CACNA1H;GFRA4
Formation Of Ternary Complex, And Subsequently, 43S Complex R-HSA-72695	5/50	0.185587	0.998968	1.72084	2.8983	EIF3J;EIF2S2;EIF2S1;RPS13;EIF3A
ABC Transporter Disorders R-HSA-5619084	7/77	0.186282	0.998968	1.54925	2.60352	ERLEC1;PSMD12;PSMB5;PSMD14;DERL1;DERL2;ABCC9
Regulation Of Insulin Secretion R-HSA-422356	7/77	0.186282	0.998968	1.54925	2.60352	CACNB2;CACNB3;ACSL4;GCG;CD36;RAPGEF3;GNAI1
RHO GTPases Activate Formins R-HSA-5663220	10/119	0.186811	0.998968	1.4219	2.38547	CENPT;DYNC1LI1;FMNL1;KIF2A;PPP2R5E;CDCA8;RHOC;CENPP;RHOD;RHOA
EPH-Ephrin Signaling R-HSA-2682334	8/91	0.187724	0.998968	1.49346	2.49823	MYL6;EFNA3;YES1;PKN2;EPHA1;EPHB1;KALRN;RHOA
Oxygen-dependent Proline Hydroxylation Of Hypoxia-inducible Factor Alpha R-HSA-1234176	6/64	0.191916	0.998968	1.60238	2.64505	EGLN1;PSMD12;PSMB5;PSMD14;ELOC;LIMD1
RAC1 GTPase Cycle R-HSA-9013149	14/178	0.194615	0.998968	1.32356	2.16632	TRIO;JAG1;MCF2;ARHGEF19;ARHGAP29;ARHGAP39;KALRN;KTN1;VANGL1;FMNL1;ARHGEF4;PKN2;FERMT2;TMPO
CDC42 GTPase Cycle R-HSA-9013148	12/149	0.195203	0.998968	1.35777	2.21821	VANGL1;FMNL1;TRIO;MCF2;PLEKHG4B;ARHGEF19;ARHGAP29;ARHGEF4;ARHGAP39;PKN2;TMPO;KTN1
Nonsense Mediated Decay (NMD) Independent Of Exon Junction Complex (EJC) R-HSA-975956	8/92	0.195495	0.998968	1.4756	2.40851	RPL4;RPL39L;RPL37A;RPL9;MRPL13;RPS13;RPL26L1;RPL7
Assembly Of ORC Complex At Origin Of Replication R-HSA-68616	4/38	0.197668	0.998968	1.82164	2.95317	ORC5;ORC4;H2BC4;H2AC19
Signaling By ROBO Receptors R-HSA-376176	16/209	0.202992	0.998968	1.28549	2.04983	RPL4;RPL39L;PSMD12;PSMD14;ARHGAP39;RPL9;MRPL13;RHOA;RPL7;PPP3CB;PSMB5;RPL37A;PKN2;ELOC;RPS13;RPL26L1
Formation Of TC-NER Pre-Incision Complex R-HSA-6781823	5/52	0.207132	0.998968	1.64744	2.59373	COPS4;COPS5;ERCC2;GTF2H2;GTF2H5
RHOD GTPase Cycle R-HSA-9013405	5/52	0.207132	0.998968	1.64744	2.59373	VANGL1;MOSPD2;ARHGAP39;RHOD;TMPO
Acetylcholine Binding And Downstream Events R-HSA-181431	2/14	0.207566	0.998968	2.57942	4.05564	CHRNB4;CHRFAM7A
Golgi Cisternae Pericentriolar Stack Reorganization R-HSA-162658	2/14	0.207566	0.998968	2.57942	4.05564	RAB2A;RAB1A
Response To Metal Ions R-HSA-5660526	2/14	0.207566	0.998968	2.57942	4.05564	MT1F;MT1X
P75 NTR Receptor-Mediated Signaling R-HSA-193704	8/95	0.219566	0.998968	1.42449	2.15967	SMPD2;LINGO1;TRIO;MCF2;ARHGEF19;ARHGEF4;KALRN;RHOA
RHO GTPase Cycle R-HSA-9012999	31/441	0.223501	0.998968	1.17342	1.75818	TRIO;FAF2;MOSPD2;TWF1;ARHGAP39;RASAL2;KALRN;GOLGA3;BAIAP2L2;MYO6;SLITRK3;PLEKHG4B;TMPO;JAG1;MCF2;ARHGEF19;ARHGAP29;RHOC;HSPE1;RHOD;RHOA;KTN1;VANGL1;COPS4;FMNL1;DLG5;ARHGEF4;PKN2;STAM2;FERMT2;TJP2
RNA Pol II CTD Phosphorylation And Interaction With CE R-HSA-77075	3/27	0.223925	0.998968	1.93492	2.8955	ERCC2;GTF2H2;GTF2H5
RNA Polymerase III Transcription Initiation From Type 3 Promoter R-HSA-76071	3/27	0.223925	0.998968	1.93492	2.8955	SNAPC5;SNAPC1;POLR3H
Signaling By Rho GTPases R-HSA-194315	44/644	0.228227	0.998968	1.13883	1.68252	TRIO;FAF2;H2AC19;MOSPD2;CDCA8;TWF1;ARHGAP39;RASAL2;KALRN;GOLGA3;BAIAP2L2;PPP2R5E;MYO6;SLITRK3;PLEKHG4B;TMPO;CENPT;JAG1;MCF2;H2BC4;ARHGEF19;ARHGAP29;RHOC;HSPE1;MAPK14;RHOD;RHOA;KTN1;VANGL1;COPS4;DYNC1LI1;MYL6;FMNL1;KIF2A;DLG5;ARHGEF4;PKN2;CENPP;S100A9;STAM2;FERMT2;S100A8;ROPN1;TJP2
Global Genome Nucleotide Excision Repair (GG-NER) R-HSA-5696399	7/82	0.230016	0.998968	1.44558	2.12444	COPS4;COPS5;ERCC2;POLK;GTF2H2;RAD23B;GTF2H5
ERBB2 Regulates Cell Motility R-HSA-6785631	2/15	0.230448	0.998968	2.38087	3.49448	NRG3;RHOA
Fatty Acids R-HSA-211935	2/15	0.230448	0.998968	2.38087	3.49448	CYP4A22;CYP4F3
Response Of EIF2AK1 (HRI) To Heme Deficiency R-HSA-9648895	2/15	0.230448	0.998968	2.38087	3.49448	EIF2S2;EIF2S1
Binding And Uptake Of Ligands By Scavenger Receptors R-HSA-2173782	4/41	0.236779	0.998968	1.67367	2.41113	HSPH1;CD36;APOB;HSP90B1
Dual Incision In GG-NER R-HSA-5696400	4/41	0.236779	0.998968	1.67367	2.41113	ERCC2;POLK;GTF2H2;GTF2H5
Adrenaline,noradrenaline Inhibits Insulin Secretion R-HSA-400042	3/28	0.240357	0.998968	1.85743	2.64801	CACNB2;CACNB3;GNAI1
Antigen Presentation: Folding, Assembly, Peptide Loading Of Class I MHC R-HSA-983170	3/28	0.240357	0.998968	1.85743	2.64801	SEC14L2;SEC23A;HLA-G
Digestion And Absorption R-HSA-8963743	3/28	0.240357	0.998968	1.85743	2.64801	PMEL;MGAM;NPC1L1
Nonsense Mediated Decay (NMD) Enhanced By Exon Junction Complex (EJC) R-HSA-975957	9/112	0.240431	0.998968	1.35357	1.92928	RPL4;RPL39L;SMG1;RPL37A;RPL9;MRPL13;RPS13;RPL26L1;RPL7
Hh Mutants Are Degraded By ERAD R-HSA-5362768	5/55	0.24085	0.998968	1.54835	2.2042	ERLEC1;PSMD12;PSMB5;PSMD14;DERL2
Ub-specific Processing Proteases R-HSA-5689880	15/201	0.241134	0.998968	1.24993	1.77791	TOMM70;USP13;USP8;USP14;PSMD12;PSMD14;USP3;H2BC4;H2AC19;WDR20;SNX3;PSMB5;PTRH2;VDAC1;STAM2
Formation Of Incision Complex In GG-NER R-HSA-5696395	4/42	0.250204	0.998968	1.62954	2.25769	ERCC2;GTF2H2;RAD23B;GTF2H5
RHOF GTPase Cycle R-HSA-9035034	4/42	0.250204	0.998968	1.62954	2.25769	VANGL1;BAIAP2L2;ARHGAP39;TMPO
RND3 GTPase Cycle R-HSA-9696264	4/42	0.250204	0.998968	1.62954	2.25769	VANGL1;DLG5;RASAL2;KTN1
Processing Of SMDT1 R-HSA-8949664	2/16	0.253476	0.998968	2.21069	3.03415	SMDT1;PMPCB
Rap1 Signaling R-HSA-392517	2/16	0.253476	0.998968	2.21069	3.03415	RAP1B;RAPGEF3
EGR2 And SOX10-mediated Initiation Of Schwann Cell Myelination R-HSA-9619665	3/29	0.256978	0.998968	1.78589	2.42661	DRP2;ADGRV1;PXMP2
Myogenesis R-HSA-525793	3/29	0.256978	0.998968	1.78589	2.42661	SPAG9;MEF2B;MAPK14
mRNA Capping R-HSA-72086	3/29	0.256978	0.998968	1.78589	2.42661	ERCC2;GTF2H2;GTF2H5
Metabolism Of Lipids R-HSA-556833	49/732	0.258422	0.998968	1.11379	1.50714	SYCP2;MTMR14;CYP4A22;GDE1;MED19;CCNC;MED16;TM7SF2;SMPD2;TSPO;MLYCD;MMUT;CD36;CBR1;ACOT8;PLA2G12A;PHYH;GPX1;STARD3NL;ACSL1;PLA2G4A;ACSL4;PLAAT3;SLC51B;MED7;ACOX1;AHRR;FAR1;HACD1;ACSS3;SEC23A;PLA2G3;ABHD5;NPAS2;PGS1;MED31;ORMDL3;DECR1;ESRRA;PNPLA8;CYP4F3;PLEKHA3;CRLS1;CDK8;FABP4;CHPT1;OSBPL1A;BMAL1;DAND5
Formation Of HIV-1 Elongation Complex Containing HIV-1 Tat R-HSA-167200	4/43	0.263785	0.998968	1.58767	2.11576	ERCC2;ELOC;GTF2H2;GTF2H5
RND2 GTPase Cycle R-HSA-9696270	4/43	0.263785	0.998968	1.58767	2.11576	VANGL1;GOLGA3;DLG5;KTN1
NCAM Signaling For Neurite Out-Growth R-HSA-375165	5/57	0.264095	0.998968	1.48864	1.98204	CACNB2;CACNB3;RPS6KA5;CACNA1H;GFRA4
NRAGE Signals Death Thru JNK R-HSA-193648	5/57	0.264095	0.998968	1.48864	1.98204	TRIO;MCF2;ARHGEF19;ARHGEF4;KALRN
Ribosomal Scanning And Start Codon Recognition R-HSA-72702	5/57	0.264095	0.998968	1.48864	1.98204	EIF3J;EIF2S2;EIF2S1;RPS13;EIF3A
Translation Initiation Complex Formation R-HSA-72649	5/57	0.264095	0.998968	1.48864	1.98204	EIF3J;EIF2S2;EIF2S1;RPS13;EIF3A
Abacavir Metabolism R-HSA-2161541	1/5	0.269042	0.998968	3.86759	5.0777	ADAL
Acetylcholine Inhibits Contraction Of Outer Hair Cells R-HSA-9667769	1/5	0.269042	0.998968	3.86759	5.0777	CHRNA10
Chylomicron Clearance R-HSA-8964026	1/5	0.269042	0.998968	3.86759	5.0777	APOB
Diseases Of Mismatch Repair (MMR) R-HSA-5423599	1/5	0.269042	0.998968	3.86759	5.0777	MSH2
Dopamine Receptors R-HSA-390651	1/5	0.269042	0.998968	3.86759	5.0777	DRD2
Intestinal Absorption R-HSA-8963676	1/5	0.269042	0.998968	3.86759	5.0777	NPC1L1
Muscarinic Acetylcholine Receptors R-HSA-390648	1/5	0.269042	0.998968	3.86759	5.0777	CHRM5
Regulation Of HMOX1 Expression And Activity R-HSA-9707587	1/5	0.269042	0.998968	3.86759	5.0777	HM13
Signaling By Membrane-Tethered Fusions Of PDGFRA Or PDGFRB R-HSA-9673768	1/5	0.269042	0.998968	3.86759	5.0777	GOLGA4
Sodium-coupled Phosphate Cotransporters R-HSA-427652	1/5	0.269042	0.998968	3.86759	5.0777	SLC34A2
Sodium-coupled Sulphate, Di- And Tri-Carboxylate Transporters R-HSA-433137	1/5	0.269042	0.998968	3.86759	5.0777	SLC13A3
TFAP2 (AP-2) Family Regulates Transcription Of Cell Cycle Factors R-HSA-8866911	1/5	0.269042	0.998968	3.86759	5.0777	KDM5B
TFAP2A Acts As A Transcriptional Repressor During Retinoic Acid Induced Cell Differentiation R-HSA-8869496	1/5	0.269042	0.998968	3.86759	5.0777	HSPD1
Tachykinin Receptors Bind Tachykinins R-HSA-380095	1/5	0.269042	0.998968	3.86759	5.0777	TACR3
VLDL Clearance R-HSA-8964046	1/5	0.269042	0.998968	3.86759	5.0777	APOB
Vitamin B1 (Thiamin) Metabolism R-HSA-196819	1/5	0.269042	0.998968	3.86759	5.0777	THTPA
vRNP Assembly R-HSA-192905	1/5	0.269042	0.998968	3.86759	5.0777	IPO5
RNA Polymerase I Transcription Termination R-HSA-73863	3/30	0.273747	0.998968	1.71966	2.2279	ERCC2;GTF2H2;GTF2H5
mRNA Activation Upon Binding Of Cap-Binding Complex And eIFs, Subsequent Binding To 43S R-HSA-72662	5/58	0.275904	0.998968	1.46047	1.88065	EIF3J;EIF2S2;EIF2S1;RPS13;EIF3A
Constitutive Signaling By NOTCH1 HD+PEST Domain Mutants R-HSA-2894862	5/58	0.275904	0.998968	1.46047	1.88065	CDK8;JAG1;HEY2;CCNC;HDAC9
Hh Mutants Abrogate Ligand Secretion R-HSA-5387390	5/58	0.275904	0.998968	1.46047	1.88065	ERLEC1;PSMD12;PSMB5;PSMD14;DERL2
Metabolism Of Polyamines R-HSA-351202	5/58	0.275904	0.998968	1.46047	1.88065	PSMD12;PSMB5;PSMD14;SMOX;AZIN2
KSRP (KHSRP) Binds And Destabilizes mRNA R-HSA-450604	2/17	0.276549	0.998968	2.0632	2.65198	EXOSC4;MAPK14
Purine Catabolism R-HSA-74259	2/17	0.276549	0.998968	2.0632	2.65198	NUDT5;NUDT15
Vitamin B5 (Pantothenate) Metabolism R-HSA-199220	2/17	0.276549	0.998968	2.0632	2.65198	PANK1;PPCDC
Metabolism Of Proteins R-HSA-392499	121/1890	0.279928	0.998968	1.06389	1.35457	RPL4;PGAP1;H2AC19;YARS2;RPL9;RPL7;PCMT1;LGALS1;CHCHD1;RPS13;RAB2A;TECTB;SLC34A2;USP8;COG8;USP3;NSMCE2;RNF40;TUFM;DPM1;DYNC1LI1;PPA2;IAPP;VDAC1;ALG10B;STAM2;PSMD12;PSMD14;CTR9;DCUN1D4;CDCA8;UBE2J2;MRPL13;HSP90B1;SNX3;PENK;APOB;ST3GAL1;RPL39L;NTNG2;PMM1;CBX2;PMM2;BTBD6;FBXO32;EIF2S2;EIF2S1;COPS4;COPS5;SP3;FBXL5;ULBP2;MRPS15;MRPS16;MRPS14;MRPS11;MRPS10;MRPL36;CDC73;MRPL33;MRPL42;SEC61G;KIF13A;ELOC;S…
Toll-like Receptor Cascades R-HSA-168898	12/162	0.28062	0.998968	1.23924	1.57476	GSDMD;USP14;RPS6KA5;S100A1;IRAK2;CTSV;CD36;APOB;MAPK14;S100A9;S100A8;HSP90B1
RHO GTPase Effectors R-HSA-195258	19/269	0.280985	0.998968	1.17781	1.49518	CENPT;H2BC4;H2AC19;CDCA8;RHOC;MAPK14;RHOD;RHOA;KTN1;DYNC1LI1;MYL6;FMNL1;KIF2A;PPP2R5E;PKN2;CENPP;S100A9;ROPN1;S100A8
Cellular Response To Hypoxia R-HSA-1234174	6/73	0.282654	0.998968	1.38647	1.75185	EGLN1;PSMD12;PSMB5;PSMD14;ELOC;LIMD1
Arachidonic Acid Metabolism R-HSA-2142753	5/59	0.287818	0.998968	1.43335	1.78513	CBR1;GPX1;CYP4A22;CYP4F3;PLA2G4A
GABA Receptor Activation R-HSA-977443	5/59	0.287818	0.998968	1.43335	1.78513	GABRB3;GABRB2;GABRA4;GABRG2;GNAI1
RNA Polymerase I Promoter Escape R-HSA-73772	5/59	0.287818	0.998968	1.43335	1.78513	H2BC4;ERCC2;H2AC19;GTF2H2;GTF2H5
Glutamate Binding, Activation Of AMPA Receptors And Synaptic Plasticity R-HSA-399721	3/31	0.290624	0.998968	1.65815	2.04902	CAMK2A;MYO6;PICK1
Metabolism Of Amino Acids And Derivatives R-HSA-71291	25/364	0.290811	0.998968	1.14313	1.41186	RPL4;PSMD12;HIBADH;PSMD14;RPL9;MRPL13;RPL7;GCSH;PSMB5;SLC25A44;RPS13;RPL39L;PDHX;ARG2;SMOX;AZIN2;ASRGL1;ASS1;SLC6A8;PXMP2;ASPG;RPL37A;KYAT3;OGDH;RPL26L1
Bile Acid And Bile Salt Metabolism R-HSA-194068	4/45	0.291322	0.998968	1.51006	1.8624	ACOT8;SYCP2;SLC51B;OSBPL1A
Formation Of HIV Elongation Complex In Absence Of HIV Tat R-HSA-167152	4/45	0.291322	0.998968	1.51006	1.8624	ERCC2;ELOC;GTF2H2;GTF2H5
RNA Polymerase II Transcribes snRNA Genes R-HSA-6807505	6/74	0.293313	0.998968	1.366	1.67543	SNAPC5;SNAPC1;INTS3;TAF8;GTF2E2;DAND5
Unfolded Protein Response (UPR) R-HSA-381119	7/89	0.29615	0.998968	1.32169	1.60835	MYDGF;EXOSC4;CREB3L2;DNAJB9;EIF2S2;EIF2S1;HSP90B1
Phase I - Functionalization Of Compounds R-HSA-211945	8/104	0.297378	0.998968	1.29032	1.56484	ALDH3A1;CYP2W1;MAOB;ALDH1B1;SMOX;CYP4F3;CYP4A22;AHRR
Signaling By TGFB Family Members R-HSA-9006936	9/119	0.297568	0.998968	1.26696	1.5357	CDK8;GREM2;ACVR1C;NEDD4L;SMAD9;CCNC;DAND5;RHOA;UCHL5
Ephrin Signaling R-HSA-3928664	2/18	0.299575	0.998968	1.93415	2.3314	PKN2;EPHB1
Lewis Blood Group Biosynthesis R-HSA-9037629	2/18	0.299575	0.998968	1.93415	2.3314	FUT6;FUT10
Phospholipase C-mediated Cascade; FGFR2 R-HSA-5654221	2/18	0.299575	0.998968	1.93415	2.3314	PLCG1;FGFR2
Synthesis Of Glycosylphosphatidylinositol (GPI) R-HSA-162710	2/18	0.299575	0.998968	1.93415	2.3314	PIGM;PIGL
Anti-inflammatory Response Favoring Leishmania Infection R-HSA-9662851	12/165	0.301843	0.998968	1.21474	1.45508	GNAZ;GPR176;CALCRL;GPR15;PPAN-P2RY11;YES1;PTRH2;IAPP;GCG;PLCG1;MAPK14;GNAI1
Sensory Processing Of Sound R-HSA-9659379	6/75	0.30405	0.998968	1.34614	1.60266	CACNB2;CTBP2;CAPZA2;TWF1;CHRNA10;EPS8L2
HIV Transcription Initiation R-HSA-167161	4/46	0.305235	0.998968	1.47403	1.74919	ERCC2;GTF2H2;GTF2E2;GTF2H5
Integration Of Energy Metabolism R-HSA-163685	8/105	0.30642	0.998968	1.27695	1.51037	CACNB2;CACNB3;ACSL4;GCG;CD36;TKT;RAPGEF3;GNAI1
Cargo Concentration In ER R-HSA-5694530	3/32	0.30757	0.998968	1.60089	1.88753	SEC23A;SEC22B;F5
PERK Regulates Gene Expression R-HSA-381042	3/32	0.30757	0.998968	1.60089	1.88753	EXOSC4;EIF2S2;EIF2S1
Acyl Chain Remodeling Of CL R-HSA-1482798	1/6	0.313459	0.998968	3.0939	3.5892	PLA2G4A
Alpha-oxidation Of Phytanate R-HSA-389599	1/6	0.313459	0.998968	3.0939	3.5892	PHYH
Cobalamin (Cbl) Metabolism R-HSA-9759218	1/6	0.313459	0.998968	3.0939	3.5892	MMUT
LDL Remodeling R-HSA-8964041	1/6	0.313459	0.998968	3.0939	3.5892	APOB
PTK6 Promotes HIF1A Stabilization R-HSA-8857538	1/6	0.313459	0.998968	3.0939	3.5892	LRRK2
Phenylalanine Metabolism R-HSA-8964208	1/6	0.313459	0.998968	3.0939	3.5892	ASRGL1
Synthesis Of 15-Eicosatetraenoic Acid Derivatives R-HSA-2142770	1/6	0.313459	0.998968	3.0939	3.5892	GPX1
Synthesis Of Wybutosine At G37 Of tRNA(Phe) R-HSA-6782861	1/6	0.313459	0.998968	3.0939	3.5892	LCMT2
TNFR1-mediated Ceramide Production R-HSA-5626978	1/6	0.313459	0.998968	3.0939	3.5892	SMPD2
Mitochondrial Fatty Acid Beta-Oxidation Of Unsaturated Fatty Acids R-HSA-77288	1/6	0.313459	0.998968	3.0939	3.5892	DECR1
rRNA Modification In Mitochondrion R-HSA-6793080	1/6	0.313459	0.998968	3.0939	3.5892	MTERF4
Organelle Biogenesis And Maintenance R-HSA-1852241	19/275	0.314022	0.998968	1.14983	1.33184	DYNC2H1;ESRRA;BBS1;ATP5PD;SMOX;TWNK;MAPK14;RAB11A;CHCHD3;IFT81;HAUS7;CEP250;B9D1;SSBP1;CEP76;NINL;ATP5MG;CCT5;ATP5MF
Regulation Of Expression Of SLITs And ROBOs R-HSA-9010553	12/167	0.316226	0.998968	1.19894	1.38034	RPL4;RPL39L;PSMD12;PSMB5;PSMD14;RPL37A;ELOC;RPL9;MRPL13;RPS13;RPL26L1;RPL7
Influenza Viral RNA Transcription And Replication R-HSA-168273	10/137	0.320996	0.998968	1.2192	1.38541	RPL4;RPL39L;RPL37A;RPL9;MRPL13;RPS13;NUP58;RPL26L1;IPO5;RPL7
Aflatoxin Activation And Detoxification R-HSA-5423646	2/19	0.322476	0.998968	1.82028	2.06006	MGST3;MGST2
Ras Activation Upon Ca2+ Influx Thru NMDA Receptor R-HSA-442982	2/19	0.322476	0.998968	1.82028	2.06006	MPP2;CAMK2A
Scavenging By Class A Receptors R-HSA-3000480	2/19	0.322476	0.998968	1.82028	2.06006	APOB;HSP90B1
Activated TAK1 Mediates P38 MAPK Activation R-HSA-450302	2/19	0.322476	0.998968	1.82028	2.06006	IRAK2;MAPK14
Metabolism Of Water-Soluble Vitamins And Cofactors R-HSA-196849	9/122	0.323033	0.998968	1.23313	1.39343	DHFR;THTPA;CYB5A;GSTO2;MTHFD1L;PANK1;ST20-MTHFS;MMUT;PPCDC
Activation Of Matrix Metalloproteinases R-HSA-1592389	3/33	0.324548	0.998968	1.54744	1.74137	MMP16;CTSV;PRSS2
Amino Acid Transport Across Plasma Membrane R-HSA-352230	3/33	0.324548	0.998968	1.54744	1.74137	SLC43A2;SLC6A14;SLC38A3
Formation Of Early Elongation Complex R-HSA-113418	3/33	0.324548	0.998968	1.54744	1.74137	ERCC2;GTF2H2;GTF2H5
NOD1/2 Signaling Pathway R-HSA-168638	3/33	0.324548	0.998968	1.54744	1.74137	IRAK2;CARD9;MAPK14
Signal Amplification R-HSA-392518	3/33	0.324548	0.998968	1.54744	1.74137	PLA2G4A;MAPK14;GNAI1
Signaling By WNT In Cancer R-HSA-4791275	3/33	0.324548	0.998968	1.54744	1.74137	CTBP2;PPP2R5E;WNT3A
Class B/2 (Secretin Family Receptors) R-HSA-373080	7/92	0.325696	0.998968	1.27483	1.4301	ADGRE2;CALCRL;SMOX;WNT3A;PTRH2;IAPP;GCG
Post-translational Modification: Synthesis Of GPI-anchored Proteins R-HSA-163125	7/92	0.325696	0.998968	1.27483	1.4301	TECTB;DPM1;NTNG2;PGAP1;PIGM;PIGL;ULBP2
Biosynthesis Of N-glycan Precursor (Dolichol LLO) And Transfer To Protein R-HSA-446193	6/77	0.325722	0.998968	1.30808	1.46728	DPM1;PMM1;RFT1;PMM2;ALG10B;ST3GAL1
Negative Epigenetic Regulation Of rRNA Expression R-HSA-5250941	6/77	0.325722	0.998968	1.30808	1.46728	H2BC4;ERCC2;H2AC19;GTF2H2;RRP8;GTF2H5
Transcription-Coupled Nucleotide Excision Repair (TC-NER) R-HSA-6781827	6/77	0.325722	0.998968	1.30808	1.46728	COPS4;COPS5;ERCC2;POLK;GTF2H2;GTF2H5
NOTCH1 Intracellular Domain Regulates Transcription R-HSA-2122947	4/48	0.333241	0.998968	1.40688	1.546	CDK8;HEY2;CCNC;HDAC9
Retrograde Transport At Trans-Golgi-Network R-HSA-6811440	4/48	0.333241	0.998968	1.40688	1.546	SCOC;GOLGA4;COG8;VPS53
Peroxisomal Protein Import R-HSA-9033241	5/63	0.336244	0.998968	1.33421	1.45418	ACOT8;PHYH;SYCP2;ACOX1;MLYCD
DNA Methylation R-HSA-5334118	3/34	0.341525	0.998968	1.49744	1.60876	UHRF1;H2BC4;H2AC19
EPHB-mediated Forward Signaling R-HSA-3928662	3/34	0.341525	0.998968	1.49744	1.60876	YES1;KALRN;RHOA
Synthesis Of Bile Acids And Bile Salts R-HSA-192105	3/34	0.341525	0.998968	1.49744	1.60876	ACOT8;SYCP2;OSBPL1A
Transcriptional Regulation By E2F6 R-HSA-8953750	3/34	0.341525	0.998968	1.49744	1.60876	MAX;E2F6;YAF2
Apoptotic Factor-Mediated Response R-HSA-111471	2/20	0.345182	0.998968	1.71906	1.82854	AVEN;GSDMD
CD209 (DC-SIGN) Signaling R-HSA-5621575	2/20	0.345182	0.998968	1.71906	1.82854	RPS6KA5;PKN2
Class I Peroxisomal Membrane Protein Import R-HSA-9603798	2/20	0.345182	0.998968	1.71906	1.82854	FIS1;PXMP2
Regulation Of FZD By Ubiquitination R-HSA-4641263	2/20	0.345182	0.998968	1.71906	1.82854	USP8;WNT3A
Regulation Of Gene Expression In Beta Cells R-HSA-210745	2/20	0.345182	0.998968	1.71906	1.82854	PDHX;IAPP
EPH-ephrin Mediated Repulsion Of Cells R-HSA-3928665	4/49	0.347295	0.998968	1.37554	1.45474	EFNA3;YES1;EPHA1;EPHB1
Regulation Of Activated PAK-2p34 By Proteasome Mediated Degradation R-HSA-211733	4/49	0.347295	0.998968	1.37554	1.45474	PSMD12;PSMB5;PSMD14;PKN2
Hedgehog Ligand Biogenesis R-HSA-5358346	5/64	0.348475	0.998968	1.31153	1.3826	ERLEC1;PSMD12;PSMB5;PSMD14;DERL2
Semaphorin Interactions R-HSA-373755	5/64	0.348475	0.998968	1.31153	1.3826	MYL6;PLXNB3;PKN2;RHOC;RHOA
Assembly Of Pre-Replicative Complex R-HSA-68867	8/110	0.352387	0.998968	1.21403	1.26626	ORC5;ORC4;PSMD12;PSMB5;PSMD14;H2BC4;H2AC19;ANAPC10
Aryl Hydrocarbon Receptor Signaling R-HSA-8937144	1/7	0.355179	0.998968	2.57812	2.6687	AHRR
Attachment Of GPI Anchor To uPAR R-HSA-162791	1/7	0.355179	0.998968	2.57812	2.6687	PGAP1
CREB Phosphorylation R-HSA-199920	1/7	0.355179	0.998968	2.57812	2.6687	RPS6KA5
Constitutive Signaling By NOTCH1 t(7;9)(NOTCH1:M1580 K2555) Translocation Mutant R-HSA-2660826	1/7	0.355179	0.998968	2.57812	2.6687	JAG1
Erythropoietin Activates Phospholipase C Gamma (PLCG) R-HSA-9027277	1/7	0.355179	0.998968	2.57812	2.6687	PLCG1
Glycerophospholipid Catabolism R-HSA-6814848	1/7	0.355179	0.998968	2.57812	2.6687	GDE1
Highly Sodium Permeable Postsynaptic Acetylcholine Nicotinic Receptors R-HSA-629587	1/7	0.355179	0.998968	2.57812	2.6687	CHRNB4
Inactivation Of CDC42 And RAC1 R-HSA-428543	1/7	0.355179	0.998968	2.57812	2.6687	ARHGAP39
Interleukin-36 Pathway R-HSA-9014826	1/7	0.355179	0.998968	2.57812	2.6687	IL36A
Phase 1 - Inactivation Of Fast Na+ Channels R-HSA-5576894	1/7	0.355179	0.998968	2.57812	2.6687	KCNIP4
Release Of Apoptotic Factors From Mitochondria R-HSA-111457	1/7	0.355179	0.998968	2.57812	2.6687	GSDMD
Signaling By RNF43 Mutants R-HSA-5340588	1/7	0.355179	0.998968	2.57812	2.6687	WNT3A
Synthesis Of 12-Eicosatetraenoic Acid Derivatives R-HSA-2142712	1/7	0.355179	0.998968	2.57812	2.6687	GPX1
Terminal Pathway Of Complement R-HSA-166665	1/7	0.355179	0.998968	2.57812	2.6687	C8A
Wax And Plasmalogen Biosynthesis R-HSA-8848584	1/7	0.355179	0.998968	2.57812	2.6687	FAR1
Zinc Efflux And Compartmentalization By SLC30 Family R-HSA-435368	1/7	0.355179	0.998968	2.57812	2.6687	SLC30A2
Influenza Infection R-HSA-168255	11/157	0.35721	0.998968	1.16637	1.2007	RPL4;RPL39L;RPL37A;KPNA4;RPL9;MRPL13;RPS13;NUP58;RPL26L1;IPO5;RPL7
Ca-dependent Events R-HSA-111996	3/35	0.358467	0.998968	1.45057	1.48817	PDE1C;CAMK2A;PLA2G4A
Gene And Protein Expression By JAK-STAT Signaling After Interleukin-12 Stimulation R-HSA-8950505	3/35	0.358467	0.998968	1.45057	1.48817	RAP1B;PKN2;S100A9
N-glycan Trimming In ER And Calnexin/Calreticulin Cycle R-HSA-532668	3/35	0.358467	0.998968	1.45057	1.48817	DERL1;DERL2;RAD23B
Nucleotide Catabolism R-HSA-8956319	3/35	0.358467	0.998968	1.45057	1.48817	ENTPD8;NUDT5;NUDT15
RHOBTB GTPase Cycle R-HSA-9706574	3/35	0.358467	0.998968	1.45057	1.48817	COPS4;MYO6;TWF1
RNA Polymerase III Transcription Initiation R-HSA-76046	3/35	0.358467	0.998968	1.45057	1.48817	SNAPC5;SNAPC1;POLR3H
Cargo Trafficking To Periciliary Membrane R-HSA-5620920	4/50	0.361356	0.998968	1.34556	1.36964	BBS1;SMOX;CCT5;RAB11A
Branched-chain Amino Acid Catabolism R-HSA-70895	2/21	0.367632	0.998968	1.6285	1.62959	HIBADH;SLC25A44
CTLA4 Inhibitory Signaling R-HSA-389513	2/21	0.367632	0.998968	1.6285	1.62959	YES1;PPP2R5E
Cellular Hexose Transport R-HSA-189200	2/21	0.367632	0.998968	1.6285	1.62959	SLC2A10;SLC2A6
Mitochondrial tRNA Aminoacylation R-HSA-379726	2/21	0.367632	0.998968	1.6285	1.62959	PPA2;YARS2
Negative Regulation Of MET Activity R-HSA-6807004	2/21	0.367632	0.998968	1.6285	1.62959	USP8;STAM2
Negative Regulation Of NMDA Receptor-Mediated Neuronal Transmission R-HSA-9617324	2/21	0.367632	0.998968	1.6285	1.62959	MPP2;CAMK2A
RHO GTPases Activate PAKs R-HSA-5627123	2/21	0.367632	0.998968	1.6285	1.62959	MYL6;PKN2
Signaling By ERBB2 TMD/JMD Mutants R-HSA-9665686	2/21	0.367632	0.998968	1.6285	1.62959	NRG3;PLCG1
Synthesis Of Leukotrienes (LT) And Eoxins (EX) R-HSA-2142691	2/21	0.367632	0.998968	1.6285	1.62959	CYP4A22;CYP4F3
Unblocking Of NMDA Receptors, Glutamate Binding And Activation R-HSA-438066	2/21	0.367632	0.998968	1.6285	1.62959	MPP2;CAMK2A
MyD88:MAL(TIRAP) Cascade Initiated On Plasma Membrane R-HSA-166058	8/112	0.371019	0.998968	1.19056	1.18044	USP14;RPS6KA5;S100A1;IRAK2;CD36;MAPK14;S100A9;S100A8
COPII-mediated Vesicle Transport R-HSA-204005	5/66	0.372996	0.998968	1.26839	1.25087	RAB1A;SEC23A;SEC23IP;SEC22B;F5
SMAD2/SMAD3:SMAD4 Heterotrimer Regulates Transcription R-HSA-2173796	3/36	0.375346	0.998968	1.40654	1.37828	CDK8;CCNC;DAND5
Transcriptional Regulation By AP-2 (TFAP2) Family Of Transcription Factors R-HSA-8864260	3/36	0.375346	0.998968	1.40654	1.37828	KDM5B;KCTD15;HSPD1
Transcriptional Activity Of SMAD2/SMAD3:SMAD4 Heterotrimer R-HSA-2173793	4/51	0.375407	0.998968	1.31686	1.29019	CDK8;NEDD4L;CCNC;DAND5
Disorders Of Transmembrane Transporters R-HSA-5619115	12/176	0.382611	0.998968	1.1326	1.08813	SLC34A2;ERLEC1;PSMD12;PSMB5;PSMD14;SLC2A10;SLC6A14;SLC12A1;DERL1;DERL2;ABCC9;NUP58
G1/S Transition R-HSA-69206	9/129	0.383801	0.998968	1.16076	1.11158	ORC5;DHFR;ORC4;PSMD12;PSMB5;PSMD14;MAX;E2F6;CKS1B
Regulation Of PTEN Stability And Activity R-HSA-8948751	5/67	0.38526	0.998968	1.24787	1.19026	USP13;PSMD12;PSMB5;PSMD14;OTUD3
Sensory Processing Of Sound By Inner Hair Cells Of Cochlea R-HSA-9662360	5/67	0.38526	0.998968	1.24787	1.19026	CACNB2;CTBP2;CAPZA2;TWF1;EPS8L2
Keratinization R-HSA-6805567	14/208	0.385449	0.998968	1.11708	1.06497	KRTAP10-10;KRTAP17-1;KRTAP19-2;KRT23;KLK14;LCE1E;KLK12;KRT27;KRT38;KRT36;KRTAP5-2;KRTAP3-1;KRTAP1-1;KRT6A
Visual Phototransduction R-HSA-2187338	7/98	0.385893	0.998968	1.1904	1.13349	RDH10;ABCA4;NAPEPLD;LPL;RNF7;APOB;STRA6
G-protein Mediated Events R-HSA-112040	4/52	0.38943	0.998968	1.28936	1.21596	PDE1C;CAMK2A;PLA2G4A;GNAI1
Regulation Of Apoptosis R-HSA-169911	4/52	0.38943	0.998968	1.28936	1.21596	PSMD12;PSMB5;PSMD14;PKN2
Selenoamino Acid Metabolism R-HSA-2408522	8/114	0.389723	0.998968	1.16797	1.1006	RPL4;RPL39L;RPL37A;RPL9;MRPL13;RPS13;RPL26L1;RPL7
Blood Group Systems Biosynthesis R-HSA-9033658	2/22	0.389773	0.998968	1.54699	1.45756	FUT6;FUT10
E2F Mediated Regulation Of DNA Replication R-HSA-113510	2/22	0.389773	0.998968	1.54699	1.45756	ORC5;ORC4
ERK/MAPK Targets R-HSA-198753	2/22	0.389773	0.998968	1.54699	1.45756	RPS6KA5;MAPK14
Signaling By NODAL R-HSA-1181150	2/22	0.389773	0.998968	1.54699	1.45756	ACVR1C;DAND5
DNA Damage Recognition In GG-NER R-HSA-5696394	3/37	0.392132	0.998968	1.3651	1.27795	COPS4;COPS5;RAD23B
Fatty acyl-CoA Biosynthesis R-HSA-75105	3/37	0.392132	0.998968	1.3651	1.27795	HACD1;ACSL1;ACSL4
MAP2K And MAPK Activation R-HSA-5674135	3/37	0.392132	0.998968	1.3651	1.27795	RAP1B;WDR83;VCL
RHOV GTPase Cycle R-HSA-9013424	3/37	0.392132	0.998968	1.3651	1.27795	VANGL1;DLG5;PKN2
SIRT1 Negatively Regulates rRNA Expression R-HSA-427359	3/37	0.392132	0.998968	1.3651	1.27795	H2BC4;H2AC19;RRP8
Host Interactions Of HIV Factors R-HSA-162909	9/130	0.392568	0.998968	1.1511	1.07633	RANBP1;PSMD12;PSMB5;PSMD14;AP1G1;PKN2;ELOC;SLC25A4;NUP58
Alpha-defensins R-HSA-1462054	1/8	0.394365	0.998968	2.2097	2.05607	PRSS2
CREB3 Factors Activate Genes R-HSA-8874211	1/8	0.394365	0.998968	2.2097	2.05607	CREB3L2
Ca2+ Activated K+ Channels R-HSA-1296052	1/8	0.394365	0.998968	2.2097	2.05607	KCNN1
Cross-presentation Of Particulate Exogenous Antigens (Phagosomes) R-HSA-1236973	1/8	0.394365	0.998968	2.2097	2.05607	CD36
Lectin Pathway Of Complement Activation R-HSA-166662	1/8	0.394365	0.998968	2.2097	2.05607	COLEC10
Linoleic Acid (LA) Metabolism R-HSA-2046105	1/8	0.394365	0.998968	2.2097	2.05607	ACSL1
Nef And Signal Transduction R-HSA-164944	1/8	0.394365	0.998968	2.2097	2.05607	PKN2
Netrin Mediated Repulsion Signals R-HSA-418886	1/8	0.394365	0.998968	2.2097	2.05607	UNC5D
POLB-Dependent Long Patch Base Excision Repair R-HSA-110362	1/8	0.394365	0.998968	2.2097	2.05607	FEN1
Phosphate Bond Hydrolysis By NTPDase Proteins R-HSA-8850843	1/8	0.394365	0.998968	2.2097	2.05607	ENTPD8
ROBO Receptors Bind AKAP5 R-HSA-9010642	1/8	0.394365	0.998968	2.2097	2.05607	PPP3CB
RUNX1 Regulates Transcription Of Genes Involved In Differentiation Of Keratinocytes R-HSA-8939242	1/8	0.394365	0.998968	2.2097	2.05607	CTSV
Regulation Of Gene Expression In Early Pancreatic Precursor Cells R-HSA-210747	1/8	0.394365	0.998968	2.2097	2.05607	PDHX
Sema4D Mediated Inhibition Of Cell Attachment And Migration R-HSA-416550	1/8	0.394365	0.998968	2.2097	2.05607	RHOA
Synthesis Of Ketone Bodies R-HSA-77111	1/8	0.394365	0.998968	2.2097	2.05607	ACSS3
Synthesis Of PG R-HSA-1483148	1/8	0.394365	0.998968	2.2097	2.05607	PGS1
Neuronal System R-HSA-112316	25/386	0.399478	0.998968	1.07219	0.983833	GABRB3;GABRB2;KCNK9;CAMK2A;GNAI1;MYO6;SLITRK3;KCNN1;MPP2;CHRNB4;KCNH5;NLGN4X;GABRA4;KCNJ14;HTR3A;ABCC9;KCNK17;SYT9;SYN2;GABRG2;CACNB2;CACNB3;SYT10;PICK1;CHRFAM7A
ADORA2B Mediated Anti-Inflammatory Cytokine Production R-HSA-9660821	9/131	0.401343	0.998968	1.14161	1.04222	GNAZ;GPR176;CALCRL;GPR15;PPAN-P2RY11;PTRH2;IAPP;GCG;GNAI1
Mitotic G1 Phase And G1/S Transition R-HSA-453279	10/147	0.402999	0.998968	1.1296	1.0266	ORC5;DHFR;ORC4;PSMD12;PSMB5;CDKN2C;PSMD14;MAX;E2F6;CKS1B
Deposition Of New CENPA-containing Nucleosomes At Centromere R-HSA-606279	4/53	0.403408	0.998968	1.26298	1.14654	CENPT;H2BC4;H2AC19;CENPP
Nucleotide-binding Domain, Leucine Rich Repeat Containing NLR Signaling Pathways R-HSA-168643	4/53	0.403408	0.998968	1.26298	1.14654	IRAK2;CARD9;SUGT1;MAPK14
Vif-mediated Degradation Of APOBEC3G R-HSA-180585	4/53	0.403408	0.998968	1.26298	1.14654	PSMD12;PSMB5;PSMD14;ELOC
Association Of TriC/CCT With Target Proteins During Biosynthesis R-HSA-390471	3/38	0.408801	0.998968	1.32603	1.18617	KIF13A;FBXL5;CCT5
Fanconi Anemia Pathway R-HSA-6783310	3/38	0.408801	0.998968	1.32603	1.18617	FANCD2;FANCE;FAN1
Signaling By RAF1 Mutants R-HSA-9656223	3/38	0.408801	0.998968	1.32603	1.18617	RAP1B;CAMK2A;VCL
Orc1 Removal From Chromatin R-HSA-68949	5/69	0.409739	0.998968	1.20874	1.07848	ORC5;ORC4;PSMD12;PSMB5;PSMD14
RHOB GTPase Cycle R-HSA-9013026	5/69	0.409739	0.998968	1.20874	1.07848	VANGL1;MCF2;ARHGAP39;PKN2;TJP2
Transcription Of HIV Genome R-HSA-167172	5/69	0.409739	0.998968	1.20874	1.07848	ERCC2;ELOC;GTF2H2;GTF2E2;GTF2H5
Digestion R-HSA-8935690	2/23	0.411561	0.998968	1.47325	1.30795	PMEL;MGAM
Long-term Potentiation R-HSA-9620244	2/23	0.411561	0.998968	1.47325	1.30795	MPP2;CAMK2A
Miscellaneous Transport And Binding Events R-HSA-5223345	2/23	0.411561	0.998968	1.47325	1.30795	MRS2;ADD2
RHOBTB1 GTPase Cycle R-HSA-9013422	2/23	0.411561	0.998968	1.47325	1.30795	COPS4;MYO6
RHOBTB2 GTPase Cycle R-HSA-9013418	2/23	0.411561	0.998968	1.47325	1.30795	MYO6;TWF1
Triglyceride Catabolism R-HSA-163560	2/23	0.411561	0.998968	1.47325	1.30795	FABP4;ABHD5
RHOJ GTPase Cycle R-HSA-9013409	4/54	0.417325	0.998968	1.23765	1.08157	VANGL1;TRIO;PKN2;TMPO
HIV Infection R-HSA-162906	15/229	0.419781	0.998968	1.08475	0.941591	RANBP1;FEN1;PSMD12;PSMD14;NEDD4L;GTF2H2;GTF2H5;GTF2E2;PSMB5;AP1G1;ERCC2;PKN2;ELOC;SLC25A4;NUP58
DAG And IP3 Signaling R-HSA-1489509	3/39	0.425327	0.998968	1.28912	1.10207	PDE1C;CAMK2A;PLCG1
Cellular Response To Chemical Stress R-HSA-9711123	12/182	0.427649	0.998968	1.09227	0.927832	PSMD12;COX7B;GPX1;PSMB5;PSMD14;HM13;NOX5;COX6A1;TKT;COX6C;COX5A;COX20
Neurotransmitter Receptors And Postsynaptic Signal Transmission R-HSA-112314	12/182	0.427649	0.998968	1.09227	0.927832	GABRB3;GABRB2;MPP2;CHRNB4;GABRA4;MYO6;CAMK2A;PICK1;CHRFAM7A;HTR3A;GABRG2;GNAI1
GPCR Downstream Signaling R-HSA-388396	39/619	0.430141	0.998968	1.04093	0.878169	GNAZ;TRIO;CALCRL;PDE1C;CHRM5;PTGER3;CAMK2A;CXCR5;TRH;KALRN;GNAI1;GRM3;GPR176;PPP3CB;HCAR1;PENK;CXCR2;GNA12;PROK2;S1PR3;CCR3;GPR15;GPR37;PPAN-P2RY11;TRPC6;TAS2R31;MCF2;ARHGEF19;TACR3;PLA2G4A;OPRK1;GCG;GPR37L1;RHOC;RHOA;PTRH2;ARHGEF4;IAPP;AGTR2
ATF6 (ATF6-alpha) Activates Chaperone Genes R-HSA-381183	1/9	0.431172	0.998968	1.93338	1.62645	HSP90B1
CD163 Mediating An Anti-Inflammatory Response R-HSA-9662834	1/9	0.431172	0.998968	1.93338	1.62645	MAPK14
CHL1 Interactions R-HSA-447041	1/9	0.431172	0.998968	1.93338	1.62645	ITGA10
Calcineurin Activates NFAT R-HSA-2025928	1/9	0.431172	0.998968	1.93338	1.62645	PPP3CB
Chylomicron Assembly R-HSA-8963888	1/9	0.431172	0.998968	1.93338	1.62645	APOB
Diseases Associated With Surfactant Metabolism R-HSA-5687613	1/9	0.431172	0.998968	1.93338	1.62645	SLC34A2
EGFR Interacts With Phospholipase C-gamma R-HSA-212718	1/9	0.431172	0.998968	1.93338	1.62645	PLCG1
Highly Calcium Permeable Nicotinic Acetylcholine Receptors R-HSA-629597	1/9	0.431172	0.998968	1.93338	1.62645	CHRNB4
Hydrolysis Of LPC R-HSA-1483115	1/9	0.431172	0.998968	1.93338	1.62645	PLA2G4A
Interleukin-1 Processing R-HSA-448706	1/9	0.431172	0.998968	1.93338	1.62645	GSDMD
MET Activates RAS Signaling R-HSA-8851805	1/9	0.431172	0.998968	1.93338	1.62645	RANBP9
Maturation Of Protein 3A R-HSA-9683673	1/9	0.431172	0.998968	1.93338	1.62645	ST3GAL1
PI3K/AKT Activation R-HSA-198203	1/9	0.431172	0.998968	1.93338	1.62645	RHOA
Prostanoid Ligand Receptors R-HSA-391908	1/9	0.431172	0.998968	1.93338	1.62645	PTGER3
Small Interfering RNA (siRNA) Biogenesis R-HSA-426486	1/9	0.431172	0.998968	1.93338	1.62645	TARBP2
Synthesis Of 5-Eicosatetraenoic Acids R-HSA-2142688	1/9	0.431172	0.998968	1.93338	1.62645	GPX1
tRNA Modification In Mitochondrion R-HSA-6787450	1/9	0.431172	0.998968	1.93338	1.62645	TRIT1
Aggrephagy R-HSA-9646399	2/24	0.432955	0.998968	1.40621	1.17716	PRKN;DYNC1LI1
RUNX2 Regulates Osteoblast Differentiation R-HSA-8940973	2/24	0.432955	0.998968	1.40621	1.17716	YES1;HEY2
Signaling By ERBB2 KD Mutants R-HSA-9664565	2/24	0.432955	0.998968	1.40621	1.17716	NRG3;PLCG1
Synthesis Of Bile Acids And Bile Salts Via 7Alpha-Hydroxycholesterol R-HSA-193368	2/24	0.432955	0.998968	1.40621	1.17716	ACOT8;SYCP2
Xenobiotics R-HSA-211981	2/24	0.432955	0.998968	1.40621	1.17716	CYP2W1;AHRR
RAC2 GTPase Cycle R-HSA-9013404	6/87	0.435572	0.998968	1.14597	0.952411	VANGL1;TRIO;MCF2;ARHGAP39;PKN2;TMPO
Transcriptional Regulation By RUNX2 R-HSA-8878166	8/119	0.436514	0.998968	1.11506	0.924308	ESRRA;PSMD12;YES1;PSMB5;PSMD14;HEY2;TWIST2;TWIST1
RNA Polymerase III Abortive And Retractive Initiation R-HSA-749476	3/40	0.441688	0.998968	1.25421	1.02488	SNAPC5;SNAPC1;POLR3H
Factors Involved In Megakaryocyte Development And Platelet Production R-HSA-983231	9/136	0.445185	0.998968	1.09637	0.887254	KIF9;KIF18B;KIF19;KIF2A;CAPZA2;MFN1;MFN2;KIF21A;CABLES2
Regulation Of RUNX2 Expression And Activity R-HSA-8939902	5/72	0.446165	0.998968	1.15443	0.931706	ESRRA;PSMD12;PSMB5;PSMD14;TWIST1
MHC Class II Antigen Presentation R-HSA-2132295	7/104	0.446307	0.998968	1.11641	0.900658	DYNC1LI1;SEC23A;KIF2A;AP1G1;CAPZA2;CTSV;OSBPL1A
Asparagine N-linked Glycosylation R-HSA-446203	18/282	0.449055	0.998968	1.05497	0.844618	RAB1A;COG8;SEC23A;PMM1;PMM2;DERL1;DERL2;RAD23B;F5;DPM1;DYNC1LI1;SEC23IP;DAD1;CAPZA2;RFT1;SEC22B;ALG10B;ST3GAL1
Signaling By GPCR R-HSA-372790	43/689	0.449749	0.998968	1.0302	0.823198	GNAZ;TRIO;CALCRL;PDE1C;CHRM5;PTGER3;CAMK2A;CXCR5;TRH;KALRN;GNAI1;GRM3;ADGRE2;GPR176;PPP3CB;HCAR1;PENK;CXCR2;GNA12;PROK2;S1PR3;DRD2;CCR3;GPR15;GPR37;PPAN-P2RY11;TRPC6;TAS2R31;SMOX;WNT3A;MCF2;ARHGEF19;TACR3;PLA2G4A;OPRK1;GCG;GPR37L1;RHOC;RHOA;PTRH2;ARHGEF4;IAPP;AGTR2
ADP Signaling Thru P2Y Purinoceptor 1 R-HSA-418592	2/25	0.453924	0.998968	1.34499	1.06231	PLA2G4A;MAPK14
Assembly And Cell Surface Presentation Of NMDA Receptors R-HSA-9609736	2/25	0.453924	0.998968	1.34499	1.06231	MPP2;CAMK2A
Cell Recruitment (Pro-Inflammatory Response) R-HSA-9664424	2/25	0.453924	0.998968	1.34499	1.06231	GSDMD;SUGT1
Deadenylation Of mRNA R-HSA-429947	2/25	0.453924	0.998968	1.34499	1.06231	CNOT9;PAIP1
Inactivation Of CSF3 (G-CSF) Signaling R-HSA-9705462	2/25	0.453924	0.998968	1.34499	1.06231	RNF7;ELOC
Interleukin-7 Signaling R-HSA-1266695	2/25	0.453924	0.998968	1.34499	1.06231	BRWD1;CRLF2
Signaling By ERBB2 In Cancer R-HSA-1227990	2/25	0.453924	0.998968	1.34499	1.06231	NRG3;PLCG1
TRP Channels R-HSA-3295583	2/25	0.453924	0.998968	1.34499	1.06231	TRPC6;TRPM6
Biological Oxidations R-HSA-211859	14/218	0.454631	0.998968	1.06175	0.836947	MAOB;GSTO2;SMOX;MGST3;CYP4F3;CYP4A22;MGST2;GGCT;ALDH3A1;CYP2W1;ALDH1B1;AHRR;SLC38A3;SULT4A1
RAB GEFs Exchange GTP For GDP On RABs R-HSA-8876198	6/89	0.457353	0.998968	1.11824	0.874799	RAB10;RAB1A;DENND1A;DENND2B;RAB18;TRAPPC13
Paradoxical Activation Of RAF Signaling By Kinase Inactive BRAF R-HSA-6802955	3/41	0.457865	0.998968	1.22114	0.953933	RAP1B;CAMK2A;VCL
Neurexins And Neuroligins R-HSA-6794361	4/57	0.458564	0.998968	1.16741	0.910178	MPP2;NLGN4X;SYT10;SYT9
Signaling By ERBB4 R-HSA-1236394	4/57	0.458564	0.998968	1.16741	0.910178	GABRB3;GABRB2;NRG3;GABRG2
Abacavir ADME R-HSA-2161522	1/10	0.465744	0.998968	1.71847	1.31312	ADAL
Activation Of PPARGC1A (PGC-1alpha) By Phosphorylation R-HSA-2151209	1/10	0.465744	0.998968	1.71847	1.31312	MAPK14
Activation Of AP-1 Family Of Transcription Factors R-HSA-450341	1/10	0.465744	0.998968	1.71847	1.31312	MAPK14
CaMK IV-mediated Phosphorylation Of CREB R-HSA-111932	1/10	0.465744	0.998968	1.71847	1.31312	CAMK2A
Creatine Metabolism R-HSA-71288	1/10	0.465744	0.998968	1.71847	1.31312	SLC6A8
FGFR2b Ligand Binding And Activation R-HSA-190377	1/10	0.465744	0.998968	1.71847	1.31312	FGFR2
Folding Of Actin By CCT/TriC R-HSA-390450	1/10	0.465744	0.998968	1.71847	1.31312	CCT5
Gap Junction Degradation R-HSA-190873	1/10	0.465744	0.998968	1.71847	1.31312	MYO6
IRAK2 Mediated Activation Of TAK1 Complex R-HSA-937042	1/10	0.465744	0.998968	1.71847	1.31312	IRAK2
Ketone Body Metabolism R-HSA-74182	1/10	0.465744	0.998968	1.71847	1.31312	ACSS3
Nef Mediated Downregulation Of MHC Class I Complex Cell Surface Expression R-HSA-164940	1/10	0.465744	0.998968	1.71847	1.31312	AP1G1
Negative Regulation Of Activity Of TFAP2 (AP-2) Family Transcription Factors R-HSA-8866904	1/10	0.465744	0.998968	1.71847	1.31312	KCTD15
Organic Cation Transport R-HSA-549127	1/10	0.465744	0.998968	1.71847	1.31312	SLC22A15
PI3K Events In ERBB4 Signaling R-HSA-1250342	1/10	0.465744	0.998968	1.71847	1.31312	NRG3
Receptor Mediated Mitophagy R-HSA-8934903	1/10	0.465744	0.998968	1.71847	1.31312	ATG5
SLBP Independent Processing Of Histone Pre-mRNAs R-HSA-111367	1/10	0.465744	0.998968	1.71847	1.31312	SNRPG
Signaling By FGFR4 In Disease R-HSA-5655291	1/10	0.465744	0.998968	1.71847	1.31312	PLCG1
Tetrahydrobiopterin (BH4) Synthesis, Recycling, Salvage And Regulation R-HSA-1474151	1/10	0.465744	0.998968	1.71847	1.31312	DHFR
rRNA Processing In Mitochondrion R-HSA-8868766	1/10	0.465744	0.998968	1.71847	1.31312	MTERF4
Switching Of Origins To A Post-Replicative State R-HSA-69052	6/90	0.468168	0.998968	1.10487	0.838515	ORC5;ORC4;PSMD12;PSMB5;PSMD14;ANAPC10
Cell Death Signaling Via NRAGE, NRIF And NADE R-HSA-204998	5/74	0.470135	0.998968	1.12085	0.845948	TRIO;MCF2;ARHGEF19;ARHGEF4;KALRN
NoRC Negatively Regulates rRNA Expression R-HSA-427413	5/74	0.470135	0.998968	1.12085	0.845948	H2BC4;ERCC2;H2AC19;GTF2H2;GTF2H5
Signaling By NOTCH1 R-HSA-1980143	5/74	0.470135	0.998968	1.12085	0.845948	CDK8;JAG1;HEY2;CCNC;HDAC9
Neddylation R-HSA-8951664	15/237	0.473159	0.998968	1.04521	0.782158	PSMD12;PSMD14;DCUN1D4;TULP4;BTBD6;RNF7;FBXO32;COMMD5;COPS4;DCAF17;PSMB5;COPS5;GAN;ELOC;FBXL5
RND1 GTPase Cycle R-HSA-9696273	3/42	0.473839	0.998968	1.18977	0.888623	VANGL1;DLG5;RASAL2
Downregulation Of TGF-beta Receptor Signaling R-HSA-2173788	2/26	0.474441	0.998968	1.28888	0.961016	NEDD4L;UCHL5
Signaling By TGF-beta Receptor Complex R-HSA-170834	6/91	0.478924	0.998968	1.09181	0.803805	CDK8;NEDD4L;CCNC;RHOA;UCHL5;DAND5
Iron Uptake And Transport R-HSA-917937	4/59	0.485497	0.998968	1.12484	0.81279	ATP6V1G2;SLC22A17;ACO1;FBXL5
O-linked Glycosylation Of Mucins R-HSA-913709	4/59	0.485497	0.998968	1.12484	0.81279	GALNT5;A4GNT;ST3GAL1;GALNT9
SCF(Skp2)-mediated Degradation Of P27/P21 R-HSA-187577	4/59	0.485497	0.998968	1.12484	0.81279	PSMD12;PSMB5;PSMD14;CKS1B
Gene Silencing By RNA R-HSA-211000	7/108	0.486025	0.998968	1.07196	0.773415	H2BC4;H2AC19;MOV10L1;ANG;FKBP6;NUP58;TARBP2
Nucleotide Excision Repair R-HSA-5696398	7/108	0.486025	0.998968	1.07196	0.773415	COPS4;COPS5;ERCC2;POLK;GTF2H2;RAD23B;GTF2H5
BMAL1:CLOCK,NPAS2 Activates Circadian Gene Expression R-HSA-1368108	2/27	0.494482	0.998968	1.23726	0.871336	BMAL1;NPAS2
CREB1 Phosphorylation Thru NMDA Receptor-Mediated Activation Of RAS Signaling R-HSA-442742	2/27	0.494482	0.998968	1.23726	0.871336	MPP2;CAMK2A
Integrin Signaling R-HSA-354192	2/27	0.494482	0.998968	1.23726	0.871336	RAP1B;RAPGEF3
Signaling By BMP R-HSA-201451	2/27	0.494482	0.998968	1.23726	0.871336	GREM2;SMAD9
Role Of Nef In HIV-1 Replication And Disease Pathogenesis R-HSA-164952	2/27	0.494482	0.998968	1.23726	0.871336	AP1G1;PKN2
ATF6 (ATF6-alpha) Activates Chaperones R-HSA-381033	1/11	0.498216	0.998968	1.54654	1.07751	HSP90B1
Activation Of Phototransduction Cascade R-HSA-2485179	1/11	0.498216	0.998968	1.54654	1.07751	RNF7
Apoptotic Cleavage Of Cell Adhesion Proteins R-HSA-351906	1/11	0.498216	0.998968	1.54654	1.07751	TJP2
Aspartate And Asparagine Metabolism R-HSA-8963693	1/11	0.498216	0.998968	1.54654	1.07751	ASPG
CLEC7A (Dectin-1) Induces NFAT Activation R-HSA-5607763	1/11	0.498216	0.998968	1.54654	1.07751	PPP3CB
DSCAM Interactions R-HSA-376172	1/11	0.498216	0.998968	1.54654	1.07751	MAPK14
Erythrocytes Take Up Carbon Dioxide And Release Oxygen R-HSA-1237044	1/11	0.498216	0.998968	1.54654	1.07751	CYB5R4
Ethanol Oxidation R-HSA-71384	1/11	0.498216	0.998968	1.54654	1.07751	ALDH1B1
Formation Of Apoptosome R-HSA-111458	1/11	0.498216	0.998968	1.54654	1.07751	AVEN
MET Activates RAP1 And RAC1 R-HSA-8875555	1/11	0.498216	0.998968	1.54654	1.07751	RAP1B
NOTCH4 Activation And Transmission Of Signal To Nucleus R-HSA-9013700	1/11	0.498216	0.998968	1.54654	1.07751	JAG1
Phenylalanine And Tyrosine Metabolism R-HSA-8963691	1/11	0.498216	0.998968	1.54654	1.07751	ASRGL1
SARS-CoV-2 Modulates Autophagy R-HSA-9754560	1/11	0.498216	0.998968	1.54654	1.07751	TUFM
SLBP Dependent Processing Of Replication-Dependent Histone Pre-mRNAs R-HSA-77588	1/11	0.498216	0.998968	1.54654	1.07751	SNRPG
Meiotic Synapsis R-HSA-1221632	4/60	0.498759	0.998968	1.1047	0.768461	SYCP2;H2BC4;H2AC19;FKBP6
Unattached Kinetochores Signal Amplification Via A MAD2 Inhibitory Signal R-HSA-141444	6/93	0.500233	0.998968	1.0666	0.738813	CENPT;DYNC1LI1;KIF2A;PPP2R5E;CDCA8;CENPP
Antigen Processing: Ubiquitination And Proteasome Degradation R-HSA-983168	19/307	0.500702	0.998968	1.02031	0.705792	PRKN;ANAPC13;PSMD12;UBE3C;PSMD14;UBA5;NEDD4L;BTBD6;RNF7;UBE2J2;FBXO32;ANAPC10;NPEPPS;PSMB5;GAN;ELOC;FBXL5;TRIM11;RNF220
Interleukin-12 Signaling R-HSA-9020591	3/44	0.505113	0.998968	1.13161	0.772861	RAP1B;PKN2;S100A9
TP53 Regulates Transcription Of Cell Death Genes R-HSA-5633008	3/44	0.505113	0.998968	1.13161	0.772861	BNIP3L;CRADD;RABGGTB
Mitotic Spindle Checkpoint R-HSA-69618	7/110	0.505582	0.998968	1.05104	0.716853	CENPT;DYNC1LI1;KIF2A;PPP2R5E;CDCA8;CENPP;ANAPC10
DNA Replication Pre-Initiation R-HSA-69002	8/127	0.510177	0.998968	1.03965	0.699683	ORC5;ORC4;PSMD12;PSMB5;PSMD14;H2BC4;H2AC19;ANAPC10
Glycerophospholipid Biosynthesis R-HSA-1483206	8/127	0.510177	0.998968	1.03965	0.699683	PGS1;PLA2G12A;PNPLA8;PLA2G3;PLA2G4A;PLAAT3;CHPT1;CRLS1
Interconversion Of Nucleotide Di- And Triphosphates R-HSA-499943	2/28	0.51403	0.998968	1.18961	0.791656	CTPS1;AK6
Prefoldin Mediated Transfer Of Substrate To CCT/TriC R-HSA-389957	2/28	0.51403	0.998968	1.18961	0.791656	VBP1;CCT5
RNA Polymerase I Promoter Clearance R-HSA-73854	5/78	0.517	0.998968	1.05921	0.698773	H2BC4;ERCC2;H2AC19;GTF2H2;GTF2H5
Heme Signaling R-HSA-9707616	3/45	0.520383	0.998968	1.10461	0.721519	APOB;BMAL1;NPAS2
Metabolism Of Nucleotides R-HSA-15869	6/95	0.521229	0.998968	1.04252	0.679269	ADAL;ENTPD8;CTPS1;NUDT5;NUDT15;AK6
UCH Proteinases R-HSA-5689603	6/95	0.521229	0.998968	1.04252	0.679269	ASXL1;PSMD12;PSMB5;PSMD14;H2AC19;UCHL5
Signaling By WNT R-HSA-195721	18/294	0.521372	0.998968	1.00845	0.656791	VPS29;USP8;PSMD12;CTBP2;WNT5B;PSMD14;WNT3A;H2BC4;CAMK2A;H2AC19;VPS26A;RHOA;CDC73;SNX3;SOX3;PPP3CB;PSMB5;PPP2R5E
Signaling By BRAF And RAF1 Fusions R-HSA-6802952	4/62	0.524825	0.998968	1.06649	0.687555	RAP1B;CAMK2A;VCL;QKI
RNA Polymerase I Transcription R-HSA-73864	5/79	0.528447	0.998968	1.04484	0.666413	H2BC4;ERCC2;H2AC19;GTF2H2;GTF2H5
Activation Of RAC1 R-HSA-428540	1/12	0.528716	0.998968	1.40587	0.895966	PKN2
CD28 Dependent Vav1 Pathway R-HSA-389359	1/12	0.528716	0.998968	1.40587	0.895966	PKN2
Glutathione Synthesis And Recycling R-HSA-174403	1/12	0.528716	0.998968	1.40587	0.895966	GGCT
Hyaluronan Uptake And Degradation R-HSA-2160916	1/12	0.528716	0.998968	1.40587	0.895966	CHORDC1
Lysine Catabolism R-HSA-71064	1/12	0.528716	0.998968	1.40587	0.895966	OGDH
P2Y Receptors R-HSA-417957	1/12	0.528716	0.998968	1.40587	0.895966	PPAN-P2RY11
POU5F1 (OCT4), SOX2, NANOG Activate Genes Related To Proliferation R-HSA-2892247	1/12	0.528716	0.998968	1.40587	0.895966	EPHA1
Platelet Adhesion To Exposed Collagen R-HSA-75892	1/12	0.528716	0.998968	1.40587	0.895966	ITGA10
Presynaptic Nicotinic Acetylcholine Receptors R-HSA-622323	1/12	0.528716	0.998968	1.40587	0.895966	CHRNB4
TP53 Regulates Transcription Of Caspase Activators And Caspases R-HSA-6803207	1/12	0.528716	0.998968	1.40587	0.895966	CRADD
Transport Of Nucleosides And Free Purine And Pyrimidine Bases Across Plasma Membrane R-HSA-83936	1/12	0.528716	0.998968	1.40587	0.895966	SLC25A4
p38MAPK Events R-HSA-171007	1/12	0.528716	0.998968	1.40587	0.895966	MAPK14
G Alpha (I) Signaling Events R-HSA-418594	19/312	0.529722	0.998968	1.00263	0.637071	GNAZ;GPR37;PDE1C;TAS2R31;PTGER3;CAMK2A;CXCR5;PLA2G4A;OPRK1;GPR37L1;GNAI1;GRM3;PPP3CB;HCAR1;PENK;CXCR2;S1PR3;AGTR2;CCR3
Transmission Across Chemical Synapses R-HSA-112315	15/246	0.532285	0.998968	1.004	0.633101	GABRB3;GABRB2;MPP2;CHRNB4;GABRA4;CAMK2A;HTR3A;SYN2;GABRG2;GNAI1;CACNB2;CACNB3;MYO6;PICK1;CHRFAM7A
Adherens Junctions Interactions R-HSA-418990	2/29	0.533071	0.998968	1.14549	0.72063	ANG;CDH19
Disassembly Of Destruction Complex And Recruitment Of AXIN To Membrane R-HSA-4641262	2/29	0.533071	0.998968	1.14549	0.72063	PPP2R5E;WNT3A
Downregulation Of ERBB2 Signaling R-HSA-8863795	2/29	0.533071	0.998968	1.14549	0.72063	USP8;NRG3
Downstream Signaling Of Activated FGFR2 R-HSA-5654696	2/29	0.533071	0.998968	1.14549	0.72063	PLCG1;FGFR2
FCERI Mediated Ca+2 Mobilization R-HSA-2871809	2/29	0.533071	0.998968	1.14549	0.72063	PPP3CB;PLCG1
FCERI Mediated MAPK Activation R-HSA-2871796	2/29	0.533071	0.998968	1.14549	0.72063	PKN2;PLCG1
G1/S-Specific Transcription R-HSA-69205	2/29	0.533071	0.998968	1.14549	0.72063	DHFR;E2F6
PIWI-interacting RNA (piRNA) Biogenesis R-HSA-5601884	2/29	0.533071	0.998968	1.14549	0.72063	MOV10L1;FKBP6
RNA Polymerase I Transcription Initiation R-HSA-73762	3/46	0.535394	0.998968	1.07886	0.674022	ERCC2;GTF2H2;GTF2H5
Autodegradation Of Cdh1 By Cdh1:APC/C R-HSA-174084	4/63	0.53761	0.998968	1.04836	0.650633	PSMD12;PSMB5;PSMD14;ANAPC10
Signaling By MET R-HSA-6806834	4/63	0.53761	0.998968	1.04836	0.650633	RAP1B;USP8;RANBP9;STAM2
Synthesis Of Substrates In N-glycan Biosythesis R-HSA-446219	4/63	0.53761	0.998968	1.04836	0.650633	DPM1;PMM1;PMM2;ST3GAL1
Anchoring Of Basal Body To Plasma Membrane R-HSA-5620912	6/97	0.541867	0.998968	1.0195	0.62468	HAUS7;CEP250;B9D1;CEP76;NINL;RAB11A
EML4 And NUDC In Mitotic Spindle Formation R-HSA-9648025	6/97	0.541867	0.998968	1.0195	0.62468	CENPT;DYNC1LI1;KIF2A;PPP2R5E;CDCA8;CENPP
PLC Beta Mediated Events R-HSA-112043	3/47	0.550133	0.998968	1.05429	0.630036	PDE1C;CAMK2A;PLA2G4A
SARS-CoV-2 Modulates Host Translation Machinery R-HSA-9754678	3/47	0.550133	0.998968	1.05429	0.630036	SNRPG;GEMIN7;RPS13
Gap-filling DNA Repair Synthesis And Ligation In TC-NER R-HSA-6782210	4/64	0.550219	0.998968	1.03083	0.615857	ERCC2;POLK;GTF2H2;GTF2H5
Senescence-Associated Secretory Phenotype (SASP) R-HSA-2559582	5/81	0.550968	0.998968	1.01724	0.606352	CDKN2C;H2BC4;H2AC19;ANAPC10;VENTX
Signaling By NOTCH4 R-HSA-9013694	5/81	0.550968	0.998968	1.01724	0.606352	PSMD12;PSMB5;JAG1;PSMD14;HEY2
TP53 Regulates Metabolic Genes R-HSA-5628897	5/81	0.550968	0.998968	1.01724	0.606352	COX7B;COX6A1;COX6C;COX5A;COX20
Endosomal Sorting Complex Required For Transport (ESCRT) R-HSA-917729	2/30	0.551594	0.998968	1.10452	0.657128	SNF8;STAM2
MAPK Targets/ Nuclear Events Mediated By MAP Kinases R-HSA-450282	2/30	0.551594	0.998968	1.10452	0.657128	RPS6KA5;MAPK14
Signaling By CSF3 (G-CSF) R-HSA-9674555	2/30	0.551594	0.998968	1.10452	0.657128	RNF7;ELOC
Metabolism Of RNA R-HSA-8953854	40/666	0.554144	0.998968	0.987506	0.582954	RPL4;SMG1;PSMD12;NXT1;TP53RK;PSMD14;HEATR1;RPL9;MRPL13;RPL7;PSMB5;EXOSC4;LCMT2;TXNL4A;RPS13;PAIP1;RPL39L;UTP11;NSUN2;MTERF4;RPP40;GTF2H2;WDR12;MAPK14;ADAT3;GTF2H5;TRIT1;TRMT9B;GCFC2;CTU2;RPL37A;ERCC2;SNRPG;RPP21;TSR1;HNRNPH2;GEMIN7;CNOT9;NUP58;RPL26L1
HIV Life Cycle R-HSA-162587	9/149	0.555981	0.998968	0.99387	0.583422	RANBP1;FEN1;ERCC2;NEDD4L;ELOC;GTF2H2;GTF2E2;NUP58;GTF2H5
Adenylate Cyclase Inhibitory Pathway R-HSA-170670	1/13	0.557364	0.998968	1.28865	0.753261	GNAI1
Advanced Glycosylation Endproduct Receptor Signaling R-HSA-879415	1/13	0.557364	0.998968	1.28865	0.753261	CAPZA2
Cytochrome C-Mediated Apoptotic Response R-HSA-111461	1/13	0.557364	0.998968	1.28865	0.753261	AVEN
Defects In Cobalamin (B12) Metabolism R-HSA-3296469	1/13	0.557364	0.998968	1.28865	0.753261	MMUT
Downregulation Of ERBB2:ERBB3 Signaling R-HSA-1358803	1/13	0.557364	0.998968	1.28865	0.753261	USP8
ERBB2 Activates PTK6 Signaling R-HSA-8847993	1/13	0.557364	0.998968	1.28865	0.753261	NRG3
FCGR Activation R-HSA-2029481	1/13	0.557364	0.998968	1.28865	0.753261	YES1
FGFR2c Ligand Binding And Activation R-HSA-190375	1/13	0.557364	0.998968	1.28865	0.753261	FGFR2
Glycogen Synthesis R-HSA-3322077	1/13	0.557364	0.998968	1.28865	0.753261	PGM1
PTK6 Regulates RHO GTPases, RAS GTPase And MAP Kinases R-HSA-8849471	1/13	0.557364	0.998968	1.28865	0.753261	RHOA
Phospholipase C-mediated Cascade; FGFR3 R-HSA-5654227	1/13	0.557364	0.998968	1.28865	0.753261	PLCG1
Purine Salvage R-HSA-74217	1/13	0.557364	0.998968	1.28865	0.753261	ADAL
SHC1 Events In ERBB4 Signaling R-HSA-1250347	1/13	0.557364	0.998968	1.28865	0.753261	NRG3
Cyclin E Associated Events During G1/S Transition R-HSA-69202	5/82	0.562031	0.998968	1.00397	0.578487	PSMD12;PSMB5;PSMD14;MAX;CKS1B
Epigenetic Regulation Of Gene Expression R-HSA-212165	7/116	0.56258	0.998968	0.992861	0.571116	UHRF1;H2BC4;ERCC2;H2AC19;GTF2H2;RRP8;GTF2H5
Cytochrome P450 - Arranged By Substrate Type R-HSA-211897	4/65	0.562645	0.998968	1.01388	0.583087	CYP2W1;CYP4A22;CYP4F3;AHRR
Dual Incision In TC-NER R-HSA-6782135	4/65	0.562645	0.998968	1.01388	0.583087	ERCC2;POLK;GTF2H2;GTF2H5
Regulation Of RAS By GAPs R-HSA-5658442	4/65	0.562645	0.998968	1.01388	0.583087	PSMD12;PSMB5;PSMD14;RASAL2
ER To Golgi Anterograde Transport R-HSA-199977	8/133	0.563293	0.998968	0.989428	0.567888	DYNC1LI1;RAB1A;COG8;SEC23A;SEC23IP;CAPZA2;SEC22B;F5
Cross-presentation Of Soluble Exogenous Antigens (Endosomes) R-HSA-1236978	3/48	0.564593	0.998968	1.0308	0.589259	PSMD12;PSMB5;PSMD14
Inositol Phosphate Metabolism R-HSA-1483249	3/48	0.564593	0.998968	1.0308	0.589259	PPIP5K2;PLCG1;IP6K3
Metalloprotease DUBs R-HSA-5689901	2/31	0.569592	0.998968	1.06638	0.600196	PSMD14;H2AC19
RUNX2 Regulates Bone Development R-HSA-8941326	2/31	0.569592	0.998968	1.06638	0.600196	YES1;HEY2
Stimuli-sensing Channels R-HSA-2672351	6/100	0.572067	0.998968	0.986801	0.551127	TRPC6;TTYH1;CLCNKB;NEDD4L;TRPM6;SLC9C2
Platelet Homeostasis R-HSA-418346	5/83	0.572954	0.998968	0.991047	0.551963	TRPC6;PPP2R5E;PLA2G4A;APOB;MAPK14
Signaling By Hedgehog R-HSA-5358351	8/135	0.580437	0.998968	0.973742	0.52969	DYNC2H1;ERLEC1;PSMD12;PSMB5;PSMD14;SMOX;DERL2;CDC73
Cilium Assembly R-HSA-5617833	11/186	0.58077	0.998968	0.971571	0.527953	DYNC2H1;BBS1;IFT81;HAUS7;SMOX;CEP250;B9D1;CEP76;NINL;CCT5;RAB11A
Metabolism Of Vitamins And Cofactors R-HSA-196854	11/186	0.58077	0.998968	0.971571	0.527953	DHFR;THTPA;CYB5A;GSTO2;MTHFD1L;PANK1;ST20-MTHFS;LPL;MMUT;APOB;PPCDC
Cyclin A:Cdk2-associated Events At S Phase Entry R-HSA-69656	5/84	0.583734	0.998968	0.97845	0.526709	PSMD12;PSMB5;PSMD14;MAX;CKS1B
Degradation Of Beta-Catenin By Destruction Complex R-HSA-195253	5/84	0.583734	0.998968	0.97845	0.526709	PSMD12;PSMB5;CTBP2;PSMD14;PPP2R5E
APC Truncation Mutants Have Impaired AXIN Binding R-HSA-5467337	1/14	0.584272	0.998968	1.18946	0.639201	PPP2R5E
Constitutive Signaling By EGFRvIII R-HSA-5637810	1/14	0.584272	0.998968	1.18946	0.639201	PLCG1
Creation Of C4 And C2 Activators R-HSA-166786	1/14	0.584272	0.998968	1.18946	0.639201	COLEC10
DCC Mediated Attractive Signaling R-HSA-418885	1/14	0.584272	0.998968	1.18946	0.639201	TRIO
Glycogen Breakdown (Glycogenolysis) R-HSA-70221	1/14	0.584272	0.998968	1.18946	0.639201	PGM1
Heme Biosynthesis R-HSA-189451	1/14	0.584272	0.998968	1.18946	0.639201	UROS
Lysosphingolipid And LPA Receptors R-HSA-419408	1/14	0.584272	0.998968	1.18946	0.639201	S1PR3
Mismatch Repair (MMR) Directed By MSH2:MSH3 (MutSbeta) R-HSA-5358606	1/14	0.584272	0.998968	1.18946	0.639201	MSH2
Mismatch Repair (MMR) Directed By MSH2:MSH6 (MutSalpha) R-HSA-5358565	1/14	0.584272	0.998968	1.18946	0.639201	MSH2
Pentose Phosphate Pathway R-HSA-71336	1/14	0.584272	0.998968	1.18946	0.639201	TKT
RUNX3 Regulates NOTCH Signaling R-HSA-8941856	1/14	0.584272	0.998968	1.18946	0.639201	JAG1
Regulation Of TP53 Activity Thru Association With Co-factors R-HSA-6804759	1/14	0.584272	0.998968	1.18946	0.639201	POU4F2
Removal Of Flap Intermediate R-HSA-69166	1/14	0.584272	0.998968	1.18946	0.639201	FEN1
Repression Of WNT Target Genes R-HSA-4641265	1/14	0.584272	0.998968	1.18946	0.639201	CTBP2
TP53 Regulates Transcription Of Additional Cell Death Genes With Uncertain Roles In P53-Dependent Apoptosis R-HSA-6803205	1/14	0.584272	0.998968	1.18946	0.639201	RABGGTB
Tryptophan Catabolism R-HSA-71240	1/14	0.584272	0.998968	1.18946	0.639201	KYAT3
APC/C:Cdc20 Mediated Degradation Of Securin R-HSA-174154	4/67	0.586919	0.998968	0.981584	0.523055	PSMD12;PSMB5;PSMD14;ANAPC10
Activation Of Pre-Replicative Complex R-HSA-68962	2/32	0.58706	0.998968	1.03078	0.549022	ORC5;ORC4
Generation Of Second Messenger Molecules R-HSA-202433	2/32	0.58706	0.998968	1.03078	0.549022	PKN2;PLCG1
RAF Activation R-HSA-5673000	2/32	0.58706	0.998968	1.03078	0.549022	PPP2R5E;CAMK2A
RNA Polymerase I Promoter Opening R-HSA-73728	2/32	0.58706	0.998968	1.03078	0.549022	H2BC4;H2AC19
Separation Of Sister Chromatids R-HSA-2467813	10/170	0.588028	0.998968	0.966027	0.512942	CENPT;DYNC1LI1;PSMD12;PSMB5;PSMD14;KIF2A;PPP2R5E;CDCA8;CENPP;ANAPC10
G Alpha (S) Signaling Events R-HSA-418555	9/153	0.588298	0.998968	0.966055	0.512514	GNAZ;GPR176;CALCRL;GPR15;PPAN-P2RY11;PTRH2;IAPP;GCG;GNAI1
Metabolism Of Steroids R-HSA-8957322	9/153	0.588298	0.998968	0.966055	0.512514	ACOT8;SEC23A;SYCP2;STARD3NL;TSPO;SLC51B;OSBPL1A;DAND5;TM7SF2
Late Phase Of HIV Life Cycle R-HSA-162599	8/136	0.58889	0.998968	0.966083	0.511556	RANBP1;ERCC2;NEDD4L;ELOC;GTF2H2;GTF2E2;NUP58;GTF2H5
Synthesis Of DNA R-HSA-69239	7/119	0.589937	0.998968	0.966111	0.509855	ORC5;ORC4;PSMD12;FEN1;PSMB5;PSMD14;ANAPC10
Potassium Channels R-HSA-1296071	6/102	0.591644	0.998968	0.966139	0.507079	KCNH5;KCNK9;KCNJ14;KCNN1;ABCC9;KCNK17
Regulation Of Ornithine Decarboxylase (ODC) R-HSA-350562	3/50	0.592641	0.998968	0.986834	0.516278	PSMD12;PSMB5;PSMD14
Hedgehog On State R-HSA-5632684	5/85	0.594365	0.998968	0.966167	0.502661	PSMD12;PSMB5;PSMD14;SMOX;CDC73
Infectious Disease R-HSA-5663205	57/961	0.596028	0.998968	0.97362	0.503816	RPL4;FEN1;H2AC19;RPL9;RPL7;IPO5;GPR176;AP1G1;KPNA4;ELOC;RPS13;TOMM70;ATP1B3;HLA-G;TUFM;DYNC1LI1;DAD1;PTRH2;RPL37A;SNRPG;IAPP;GEMIN7;SLC25A4;STAM2;NUP58;GNAZ;SEC23A;PSMD12;CALCRL;PSMD14;NEDD4L;ATP1A3;MRPL13;GNAI1;GTF2E2;PSMB5;IRAK2;PLCG1;ST3GAL1;GSDMD;RPL39L;RANBP1;GPR15;YES1;PPAN-P2RY11;H2BC4;GCG;SNF8;GTF2H2;MAPK14;USH2A;GTF2H5;FXYD2;ERCC2;PKN2;SUGT1;RPL26L1
CaM Pathway R-HSA-111997	2/33	0.603996	0.998968	0.997474	0.502914	PDE1C;CAMK2A
Cooperation Of Prefoldin And TriC/CCT In Actin And Tubulin Folding R-HSA-389958	2/33	0.603996	0.998968	0.997474	0.502914	VBP1;CCT5
Oncogene Induced Senescence R-HSA-2559585	2/33	0.603996	0.998968	0.997474	0.502914	CDKN2C;DAND5
Packaging Of Telomere Ends R-HSA-171306	2/33	0.603996	0.998968	0.997474	0.502914	H2BC4;H2AC19
Plasma Lipoprotein Remodeling R-HSA-8963899	2/33	0.603996	0.998968	0.997474	0.502914	LPL;APOB
Signaling By High-Kinase Activity BRAF Mutants R-HSA-6802948	2/33	0.603996	0.998968	0.997474	0.502914	RAP1B;VCL
Striated Muscle Contraction R-HSA-390522	2/33	0.603996	0.998968	0.997474	0.502914	MYBPC1;MYH8
DNA Replication R-HSA-69306	9/155	0.604037	0.998968	0.952719	0.480285	ORC5;ORC4;PSMD12;FEN1;PSMB5;PSMD14;H2BC4;H2AC19;ANAPC10
Autodegradation Of E3 Ubiquitin Ligase COP1 R-HSA-349425	3/51	0.606219	0.998968	0.966223	0.483609	PSMD12;PSMB5;PSMD14
GSK3B And BTRC:CUL1-mediated-degradation Of NFE2L2 R-HSA-9762114	3/51	0.606219	0.998968	0.966223	0.483609	PSMD12;PSMB5;PSMD14
Ubiquitin Mediated Degradation Of Phosphorylated Cdc25A R-HSA-69601	3/51	0.606219	0.998968	0.966223	0.483609	PSMD12;PSMB5;PSMD14
Ubiquitin-dependent Degradation Of Cyclin D R-HSA-75815	3/51	0.606219	0.998968	0.966223	0.483609	PSMD12;PSMB5;PSMD14
Vpu Mediated Degradation Of CD4 R-HSA-180534	3/51	0.606219	0.998968	0.966223	0.483609	PSMD12;PSMB5;PSMD14
CTNNB1 S33 Mutants Not Phosphorylated R-HSA-5358747	1/15	0.609545	0.998968	1.10444	0.546744	PPP2R5E
Constitutive Signaling By NOTCH1 HD Domain Mutants R-HSA-2691232	1/15	0.609545	0.998968	1.10444	0.546744	JAG1
Depolymerisation Of Nuclear Lamina R-HSA-4419969	1/15	0.609545	0.998968	1.10444	0.546744	TMPO
Eicosanoid Ligand-Binding Receptors R-HSA-391903	1/15	0.609545	0.998968	1.10444	0.546744	PTGER3
Elevation Of Cytosolic Ca2+ Levels R-HSA-139853	1/15	0.609545	0.998968	1.10444	0.546744	TRPC6
GRB2 Events In ERBB2 Signaling R-HSA-1963640	1/15	0.609545	0.998968	1.10444	0.546744	NRG3
GRB2:SOS Provides Linkage To MAPK Signaling For Integrins R-HSA-354194	1/15	0.609545	0.998968	1.10444	0.546744	RAP1B
IRAK2 Mediated Activation Of TAK1 Complex Upon TLR7/8 Or 9 Stimulation R-HSA-975163	1/15	0.609545	0.998968	1.10444	0.546744	IRAK2
InlB-mediated Entry Of Listeria Monocytogenes Into Host Cell R-HSA-8875360	1/15	0.609545	0.998968	1.10444	0.546744	STAM2
Mismatch Repair R-HSA-5358508	1/15	0.609545	0.998968	1.10444	0.546744	MSH2
Negative Regulation Of TCF-dependent Signaling By WNT Ligand Antagonists R-HSA-3772470	1/15	0.609545	0.998968	1.10444	0.546744	WNT3A
Organic Cation/Anion/Zwitterion Transport R-HSA-549132	1/15	0.609545	0.998968	1.10444	0.546744	SLC22A15
Phase 2 - Plateau Phase R-HSA-5576893	1/15	0.609545	0.998968	1.10444	0.546744	CACNB2
Phospholipase C-mediated Cascade; FGFR4 R-HSA-5654228	1/15	0.609545	0.998968	1.10444	0.546744	PLCG1
Processive Synthesis On Lagging Strand R-HSA-69183	1/15	0.609545	0.998968	1.10444	0.546744	FEN1
Signaling By Activin R-HSA-1502540	1/15	0.609545	0.998968	1.10444	0.546744	ACVR1C
Signaling By ERBB2 ECD Mutants R-HSA-9665348	1/15	0.609545	0.998968	1.10444	0.546744	PLCG1
Synthesis Of Prostaglandins (PG) And Thromboxanes (TX) R-HSA-2162123	1/15	0.609545	0.998968	1.10444	0.546744	CBR1
p130Cas Linkage To MAPK Signaling For Integrins R-HSA-372708	1/15	0.609545	0.998968	1.10444	0.546744	RAP1B
Loss Of Nlp From Mitotic Centrosomes R-HSA-380259	4/69	0.610389	0.998968	0.95128	0.469608	HAUS7;CEP250;NINL;CEP76
Cargo Recognition For Clathrin-Mediated Endocytosis R-HSA-8856825	6/104	0.61074	0.998968	0.946321	0.466615	COPS4;COPS5;REPS2;APOB;SYT9;STAM2
Transport Of Inorganic Cations/Anions And Amino Acids/Oligopeptides R-HSA-425393	6/104	0.61074	0.998968	0.946321	0.466615	SLC34A2;SLC12A5;SLC43A2;SLC6A14;SLC12A1;SLC38A3
Death Receptor Signaling R-HSA-73887	8/139	0.613744	0.998968	0.943807	0.460746	SMPD2;LINGO1;TRIO;MCF2;ARHGEF19;ARHGEF4;KALRN;RHOA
Rab Regulation Of Trafficking R-HSA-9007101	7/122	0.61641	0.998968	0.940757	0.455178	RAB10;RAB1A;DENND1A;DENND2B;RAB18;TRAPPC13;RAB11A
Adaptive Immune System R-HSA-1280218	43/733	0.618043	0.998968	0.962167	0.462991	LILRA6;PRKN;ANAPC13;SEC23A;PSMD12;UBE3C;PSMD14;UBA5;NEDD4L;CTSV;RNF7;UBE2J2;ANAPC10;RAP1B;SEC14L2;NPEPPS;PPP3CB;PSMB5;AP1G1;PPP2R5E;SEC61G;PLCG1;ELOC;CD36;SEC61B;YES1;S100A1;BTBD6;FBXO32;HLA-G;DYNC1LI1;KIF2A;GAN;CAPZA2;PKN2;OSBPL1A;SEC22B;FBXL5;S100A9;RAPGEF3;S100A8;TRIM11;RNF220
Metabolism Of Non-Coding RNA R-HSA-194441	3/52	0.619491	0.998968	0.946454	0.453216	SNRPG;GEMIN7;NUP58
Signaling By Non-Receptor Tyrosine Kinases R-HSA-9006927	3/52	0.619491	0.998968	0.946454	0.453216	NRG3;LRRK2;RHOA
Transcriptional Activation Of Mitochondrial Biogenesis R-HSA-2151201	3/52	0.619491	0.998968	0.946454	0.453216	ESRRA;TWNK;SSBP1
CD28 Co-Stimulation R-HSA-389356	2/34	0.620401	0.998968	0.966251	0.461278	YES1;PKN2
Detoxification Of Reactive Oxygen Species R-HSA-3299685	2/34	0.620401	0.998968	0.966251	0.461278	GPX1;NOX5
Toll Like Receptor 4 (TLR4) Cascade R-HSA-166016	8/140	0.621851	0.998968	0.936607	0.444939	USP14;RPS6KA5;S100A1;IRAK2;CD36;MAPK14;S100A9;S100A8
Opioid Signaling R-HSA-111885	5/88	0.625325	0.998968	0.931096	0.437134	PPP3CB;PDE1C;CAMK2A;PLA2G4A;GNAI1
PCP/CE Pathway R-HSA-4086400	5/88	0.625325	0.998968	0.931096	0.437134	PSMD12;PSMB5;WNT5B;PSMD14;RHOA
Protein-protein Interactions At Synapses R-HSA-6794362	5/88	0.625325	0.998968	0.931096	0.437134	MPP2;NLGN4X;SYT10;SLITRK3;SYT9
Regulation Of mRNA Stability By Proteins That Bind AU-rich Elements R-HSA-450531	5/88	0.625325	0.998968	0.931096	0.437134	PSMD12;EXOSC4;PSMB5;PSMD14;MAPK14
Post-translational Protein Phosphorylation R-HSA-8957275	6/106	0.629331	0.998968	0.927295	0.429428	LGALS1;PENK;APOB;HSP90B1;F5;KTN1
Resolution Of Sister Chromatid Cohesion R-HSA-2500257	6/106	0.629331	0.998968	0.927295	0.429428	CENPT;DYNC1LI1;KIF2A;PPP2R5E;CDCA8;CENPP
Negative Regulation Of NOTCH4 Signaling R-HSA-9604323	3/53	0.632456	0.998968	0.927475	0.424917	PSMD12;PSMB5;PSMD14
Nuclear Receptor Transcription Pathway R-HSA-383280	3/53	0.632456	0.998968	0.927475	0.424917	ESRRA;RORB;NRBF2
Sensory Processing Of Sound By Outer Hair Cells Of Cochlea R-HSA-9662361	3/53	0.632456	0.998968	0.927475	0.424917	TWF1;CHRNA10;EPS8L2
Cell-extracellular Matrix Interactions R-HSA-446353	1/16	0.633283	0.998968	1.03075	0.470887	FERMT2
Early Phase Of HIV Life Cycle R-HSA-162594	1/16	0.633283	0.998968	1.03075	0.470887	FEN1
Hyaluronan Metabolism R-HSA-2142845	1/16	0.633283	0.998968	1.03075	0.470887	CHORDC1
Nucleotide-like (Purinergic) Receptors R-HSA-418038	1/16	0.633283	0.998968	1.03075	0.470887	PPAN-P2RY11
PI3K Events In ERBB2 Signaling R-HSA-1963642	1/16	0.633283	0.998968	1.03075	0.470887	NRG3
Phospholipase C-mediated Cascade: FGFR1 R-HSA-5654219	1/16	0.633283	0.998968	1.03075	0.470887	PLCG1
Plasma Lipoprotein Assembly R-HSA-8963898	1/16	0.633283	0.998968	1.03075	0.470887	APOB
Regulation Of KIT Signaling R-HSA-1433559	1/16	0.633283	0.998968	1.03075	0.470887	YES1
Regulation Of Pyruvate Dehydrogenase (PDH) Complex R-HSA-204174	1/16	0.633283	0.998968	1.03075	0.470887	PDHX
SUMOylation Of DNA Methylation Proteins R-HSA-4655427	1/16	0.633283	0.998968	1.03075	0.470887	CBX2
Sema3A PAK Dependent Axon Repulsion R-HSA-399954	1/16	0.633283	0.998968	1.03075	0.470887	PKN2
Signaling By NTRK3 (TRKC) R-HSA-9034015	1/16	0.633283	0.998968	1.03075	0.470887	PLCG1
TGF-beta Receptor Signaling In EMT (Epithelial To Mesenchymal Transition) R-HSA-2173791	1/16	0.633283	0.998968	1.03075	0.470887	RHOA
TRAF6-mediated Induction Of TAK1 Complex Within TLR4 Complex R-HSA-937072	1/16	0.633283	0.998968	1.03075	0.470887	IRAK2
NLRP3 Inflammasome R-HSA-844456	1/16	0.633283	0.998968	1.03075	0.470887	SUGT1
mRNA Decay By 3 To 5 Exoribonuclease R-HSA-429958	1/16	0.633283	0.998968	1.03075	0.470887	EXOSC4
Inwardly Rectifying K+ Channels R-HSA-1296065	2/35	0.636275	0.998968	0.936921	0.423604	KCNJ14;ABCC9
Metabolism Of Steroid Hormones R-HSA-196071	2/35	0.636275	0.998968	0.936921	0.423604	STARD3NL;TSPO
RUNX1 Interacts With Co-Factors Whose Precise Effect On RUNX1 Targets Is Not Known R-HSA-8939243	2/35	0.636275	0.998968	0.936921	0.423604	CBX2;YAF2
Rev-mediated Nuclear Export Of HIV RNA R-HSA-165054	2/35	0.636275	0.998968	0.936921	0.423604	RANBP1;NUP58
Vesicle-mediated Transport R-HSA-5653656	37/637	0.636931	0.998968	0.95196	0.429423	RAB1A;SCOC;SEC23A;DENND1A;HSP90B1;GOLGA4;HSPH1;KIF19;AP1G1;VPS53;MYO6;BNIP1;REPS2;KIF21A;CD36;TRAPPC13;APOB;SNX5;COG8;DENND2B;PLA2G4A;SNF8;SYT9;RAB11A;F5;COPS4;RAB10;DYNC1LI1;KIF9;SEC23IP;COPS5;KIF18B;KIF2A;CAPZA2;RAB18;SEC22B;STAM2
Phase II - Conjugation Of Compounds R-HSA-156580	6/107	0.63843	0.998968	0.918065	0.411975	GGCT;GSTO2;MGST3;MGST2;SLC38A3;SULT4A1
Neutrophil Degranulation R-HSA-6798695	27/468	0.638444	0.998968	0.945372	0.424209	LILRA6;PSMD12;PSMD14;FAF2;MOSPD2;RAP1B;HEBP2;CXCR2;ORMDL3;CD36;PRSS2;PGM1;GSDMD;CHRNB4;MGAM;GGH;PDAP1;ATAD3B;MAPK14;RHOA;RAB10;DYNC1LI1;RAB18;S100A9;NIT2;S100A8;VCL
AURKA Activation By TPX2 R-HSA-8854518	4/72	0.64401	0.998968	0.909166	0.40007	HAUS7;CEP250;NINL;CEP76
CDK-mediated Phosphorylation And Removal Of Cdc6 R-HSA-69017	4/72	0.64401	0.998968	0.909166	0.40007	PSMD12;PSMB5;PSMD14;ANAPC10
Cdc20:Phospho-APC/C Mediated Degradation Of Cyclin A R-HSA-174184	4/72	0.64401	0.998968	0.909166	0.40007	PSMD12;PSMB5;PSMD14;ANAPC10
Leishmania Infection R-HSA-9658195	14/247	0.64451	0.998968	0.928154	0.407705	GSDMD;GNAZ;GPR15;YES1;CALCRL;PPAN-P2RY11;GCG;MAPK14;GNAI1;GPR176;PTRH2;IAPP;PLCG1;SUGT1
AUF1 (hnRNP D0) Binds And Destabilizes mRNA R-HSA-450408	3/54	0.645111	0.998968	0.909241	0.39855	PSMD12;PSMB5;PSMD14
Degradation Of AXIN R-HSA-4641257	3/54	0.645111	0.998968	0.909241	0.39855	PSMD12;PSMB5;PSMD14
FBXL7 Down-Regulates AURKA During Mitotic Entry And In Early Mitosis R-HSA-8854050	3/54	0.645111	0.998968	0.909241	0.39855	PSMD12;PSMB5;PSMD14
Interleukin-12 Family Signaling R-HSA-447115	3/54	0.645111	0.998968	0.909241	0.39855	RAP1B;PKN2;S100A9
Regulation Of RUNX3 Expression And Activity R-HSA-8941858	3/54	0.645111	0.998968	0.909241	0.39855	PSMD12;PSMB5;PSMD14
SCF-beta-TrCP Mediated Degradation Of Emi1 R-HSA-174113	3/54	0.645111	0.998968	0.909241	0.39855	PSMD12;PSMB5;PSMD14
MAPK6/MAPK4 Signaling R-HSA-5687128	5/90	0.645156	0.998968	0.909091	0.398421	PSMD12;PSMB5;PSMD14;PKN2;KALRN
S Phase R-HSA-69242	9/161	0.649381	0.998968	0.914817	0.394959	ORC5;ORC4;PSMD12;FEN1;PSMB5;PSMD14;MAX;ANAPC10;CKS1B
Peptide Ligand-Binding Receptors R-HSA-375276	11/196	0.650334	0.998968	0.91856	0.395228	GPR37;PENK;CXCR2;CXCR5;PROK2;TACR3;OPRK1;GPR37L1;AGTR2;TRH;CCR3
Activated PKN1 Stimulates Transcription Of Androgen Receptor Regulated KLK2 And KLK3 R-HSA-5625886	2/36	0.651624	0.998968	0.909316	0.389448	H2BC4;H2AC19
Activation Of ATR In Response To Replication Stress R-HSA-176187	2/36	0.651624	0.998968	0.909316	0.389448	ORC5;ORC4
HSF1-dependent Transactivation R-HSA-3371571	2/36	0.651624	0.998968	0.909316	0.389448	HSPH1;CAMK2A
Mitochondrial Fatty Acid Beta-Oxidation R-HSA-77289	2/36	0.651624	0.998968	0.909316	0.389448	MMUT;DECR1
Platelet Aggregation (Plug Formation) R-HSA-76009	2/36	0.651624	0.998968	0.909316	0.389448	RAP1B;RAPGEF3
RHOH GTPase Cycle R-HSA-9013407	2/36	0.651624	0.998968	0.909316	0.389448	VANGL1;PKN2
Post-translational Protein Modification R-HSA-597592	81/1383	0.654691	0.998968	0.959129	0.40628	PGAP1;H2AC19;CDC73;LGALS1;ELOC;RNF152;GALNT9;RAB2A;TECTB;TOMM70;USP8;COG8;USP3;NSMCE2;RABGGTB;RAD23B;RNF40;RHOA;UCHL5;F5;COMMD5;DPM1;DYNC1LI1;GAN;DAD1;PTRH2;RFT1;PIGM;VDAC1;PIGL;SEC22B;ALG10B;STAM2;NUP58;PRKN;USP13;RAB1A;USP14;SEC23A;PSMD12;PSMD14;CTR9;DCUN1D4;DERL1;TULP4;CDCA8;DERL2;WDR20;RNF7;UBE2J2;HSP90B1;SNX3;RAB40A;DCAF17;PSMB5;PENK;APOB;ST3GAL1;NTNG2;GALNT5;PMM1;CBX2;PMM2;H2BC4;BTBD6;FBXO3…
APC/C:Cdh1 Mediated Degradation Of Cdc20 And APC/C:Cdh1 Targets In Late Mitosis/Early G1 R-HSA-174178	4/73	0.654783	0.998968	0.895942	0.379388	PSMD12;PSMB5;PSMD14;ANAPC10
APC:Cdc20 Mediated Degradation Of Cell Cycle Proteins Before Cycle Checkpoint Satisfied R-HSA-179419	4/73	0.654783	0.998968	0.895942	0.379388	PSMD12;PSMB5;PSMD14;ANAPC10
Activated Point Mutants Of FGFR2 R-HSA-2033519	1/17	0.655578	0.998968	0.966279	0.407999	FGFR2
Beta-catenin Phosphorylation Cascade R-HSA-196299	1/17	0.655578	0.998968	0.966279	0.407999	PPP2R5E
Butyrate Response Factor 1 Binds And Destabilizes mRNA R-HSA-450385	1/17	0.655578	0.998968	0.966279	0.407999	EXOSC4
IL-6-type Cytokine Receptor Ligand Interactions R-HSA-6788467	1/17	0.655578	0.998968	0.966279	0.407999	IL31RA
Protein Methylation R-HSA-8876725	1/17	0.655578	0.998968	0.966279	0.407999	ETFBKMT
RNA Polymerase III Chain Elongation R-HSA-73780	1/17	0.655578	0.998968	0.966279	0.407999	POLR3H
Removal Of Flap Intermediate From C-strand R-HSA-174437	1/17	0.655578	0.998968	0.966279	0.407999	FEN1
Trafficking Of GluR2-containing AMPA Receptors R-HSA-416993	1/17	0.655578	0.998968	0.966279	0.407999	PICK1
Translesion Synthesis By POLK R-HSA-5655862	1/17	0.655578	0.998968	0.966279	0.407999	POLK
Tristetraprolin (TTP, ZFP36) Binds And Destabilizes mRNA R-HSA-450513	1/17	0.655578	0.998968	0.966279	0.407999	EXOSC4
Zinc Transporters R-HSA-435354	1/17	0.655578	0.998968	0.966279	0.407999	SLC30A2
Amino Acids Regulate mTORC1 R-HSA-9639288	3/55	0.657454	0.998968	0.891708	0.373965	FLCN;ATP6V1G2;WDR24
Degradation Of DVL R-HSA-4641258	3/55	0.657454	0.998968	0.891708	0.373965	PSMD12;PSMB5;PSMD14
Regulation Of Cholesterol Biosynthesis By SREBP (SREBF) R-HSA-1655829	3/55	0.657454	0.998968	0.891708	0.373965	SEC23A;DAND5;TM7SF2
Mitotic Anaphase R-HSA-68882	13/232	0.658318	0.998968	0.916881	0.383318	CENPT;PSMD12;PSMD14;CDCA8;ANAPC10;DYNC1LI1;SPAST;PSMB5;KIF2A;PPP2R5E;CENPP;NUP58;TMPO
Mitotic Metaphase And Anaphase R-HSA-2555396	13/233	0.664343	0.998968	0.912664	0.37324	CENPT;PSMD12;PSMD14;CDCA8;ANAPC10;DYNC1LI1;SPAST;PSMB5;KIF2A;PPP2R5E;CENPP;NUP58;TMPO
Transcriptional Regulation By TP53 R-HSA-3700989	20/354	0.664362	0.998968	0.924561	0.378078	BNIP3L;COX7B;TP53RK;CRADD;GTF2H2;COX6C;COX6A1;RABGGTB;MAPK14;COX5A;GTF2H5;POU4F2;ING5;MSH2;FANCD2;ERCC2;ELOC;RFFL;CNOT9;COX20
Cleavage Of Damaged Purine R-HSA-110331	2/37	0.666452	0.998968	0.883288	0.358427	H2BC4;H2AC19
Interactions Of Rev With Host Cellular Proteins R-HSA-177243	2/37	0.666452	0.998968	0.883288	0.358427	RANBP1;NUP58
Triglyceride Metabolism R-HSA-8979227	2/37	0.666452	0.998968	0.883288	0.358427	FABP4;ABHD5
GPCR Ligand Binding R-HSA-500792	26/458	0.669162	0.998968	0.928998	0.373205	CALCRL;CHRM5;PTGER3;CXCR5;TRH;GRM3;ADGRE2;HCAR1;PENK;CXCR2;PROK2;S1PR3;DRD2;CCR3;GPR37;PPAN-P2RY11;TAS2R31;SMOX;WNT3A;TACR3;OPRK1;GCG;GPR37L1;PTRH2;IAPP;AGTR2
Chemokine Receptors Bind Chemokines R-HSA-380108	3/56	0.669484	0.998968	0.874837	0.351026	CXCR2;CXCR5;CCR3
Deadenylation-dependent mRNA Decay R-HSA-429914	3/56	0.669484	0.998968	0.874837	0.351026	EXOSC4;CNOT9;PAIP1
Stabilization Of P53 R-HSA-69541	3/56	0.669484	0.998968	0.874837	0.351026	PSMD12;PSMB5;PSMD14
Oxidative Stress Induced Senescence R-HSA-2559580	5/93	0.673638	0.998968	0.877958	0.346848	CDKN2C;CBX2;H2BC4;H2AC19;MAPK14
APC/C:Cdc20 Mediated Degradation Of Mitotic Proteins R-HSA-176409	4/75	0.675663	0.998968	0.870611	0.341333	PSMD12;PSMB5;PSMD14;ANAPC10
ISG15 Antiviral Mechanism R-HSA-1169408	4/75	0.675663	0.998968	0.870611	0.341333	EIF4E3;KPNA4;PLCG1;NUP58
Activation Of SMO R-HSA-5635838	1/18	0.67652	0.998968	0.90939	0.355384	SMOX
Constitutive Signaling By Ligand-Responsive EGFR Cancer Variants R-HSA-1236382	1/18	0.67652	0.998968	0.90939	0.355384	PLCG1
JNK (c-Jun Kinases) Phosphorylation And Activation Mediated By Activated Human TAK1 R-HSA-450321	1/18	0.67652	0.998968	0.90939	0.355384	IRAK2
LDL Clearance R-HSA-8964038	1/18	0.67652	0.998968	0.90939	0.355384	APOB
MECP2 Regulates Neuronal Receptors And Channels R-HSA-9022699	1/18	0.67652	0.998968	0.90939	0.355384	OPRK1
Recycling Of Bile Acids And Salts R-HSA-159418	1/18	0.67652	0.998968	0.90939	0.355384	SLC51B
Regulation Of NF-kappa B Signaling R-HSA-9758274	1/18	0.67652	0.998968	0.90939	0.355384	USP14
Regulation Of Signaling By CBL R-HSA-912631	1/18	0.67652	0.998968	0.90939	0.355384	YES1
Serotonin Neurotransmitter Release Cycle R-HSA-181429	1/18	0.67652	0.998968	0.90939	0.355384	SYN2
VEGFR2 Mediated Cell Proliferation R-HSA-5218921	1/18	0.67652	0.998968	0.90939	0.355384	PLCG1
FCGR3A-mediated IL10 Synthesis R-HSA-9664323	2/38	0.680766	0.998968	0.858707	0.330204	YES1;PLCG1
HSP90 Chaperone Cycle For Steroid Hormone Receptors (SHR) In Presence Of Ligand R-HSA-3371497	2/38	0.680766	0.998968	0.858707	0.330204	DYNC1LI1;CAPZA2
Interactions Of Vpr With Host Cellular Proteins R-HSA-176033	2/38	0.680766	0.998968	0.858707	0.330204	SLC25A4;NUP58
tRNA Processing In Nucleus R-HSA-6784531	3/57	0.681202	0.998968	0.85859	0.329609	RPP40;RPP21;NUP58
Mitotic Prophase R-HSA-68875	6/112	0.681876	0.998968	0.874526	0.334862	RAB2A;RAB1A;H2BC4;H2AC19;NUP58;TMPO
Fc Epsilon Receptor (FCERI) Signaling R-HSA-2454202	7/130	0.682184	0.998968	0.879193	0.336253	PSMD12;PPP3CB;PSMB5;PSMD14;PKN2;PLCG1;RASGRP4
RAF/MAP Kinase Cascade R-HSA-5673001	15/271	0.682498	0.998968	0.904736	0.345605	MPP2;PSMD12;PSMD14;CAMK2A;RANBP9;WDR83;RASAL2;RASGRP4;GFRA4;RAP1B;PSMB5;NRG3;PPP2R5E;VCL;FGFR2
Membrane Trafficking R-HSA-199991	34/599	0.685668	0.998968	0.928387	0.350338	RAB1A;SCOC;SEC23A;DENND1A;GOLGA4;KIF19;AP1G1;VPS53;MYO6;BNIP1;REPS2;KIF21A;TRAPPC13;APOB;SNX5;COG8;DENND2B;PLA2G4A;SNF8;SYT9;RAB11A;F5;COPS4;RAB10;DYNC1LI1;KIF9;SEC23IP;COPS5;KIF18B;KIF2A;CAPZA2;RAB18;SEC22B;STAM2
Activation Of APC/C And APC/C:Cdc20 Mediated Degradation Of Mitotic Proteins R-HSA-176814	4/76	0.685768	0.998968	0.858473	0.32383	PSMD12;PSMB5;PSMD14;ANAPC10
NIK To Noncanonical NF-kB Signaling R-HSA-5676590	3/58	0.692608	0.998968	0.842934	0.309602	PSMD12;PSMB5;PSMD14
Elastic Fibre Formation R-HSA-1566948	2/39	0.694574	0.998968	0.835454	0.304487	FBN2;FBLN1
Ovarian Tumor Domain Proteases R-HSA-5689896	2/39	0.694574	0.998968	0.835454	0.304487	RHOA;OTUD3
Synthesis Of PA R-HSA-1483166	2/39	0.694574	0.998968	0.835454	0.304487	PLA2G12A;PLA2G4A
Transcriptional Regulation By VENTX R-HSA-8853884	2/39	0.694574	0.998968	0.835454	0.304487	ANAPC10;VENTX
Assembly Of Active LPL And LIPC Lipase Complexes R-HSA-8963889	1/19	0.696189	0.998968	0.858823	0.311009	LPL
Initiation Of Nuclear Envelope (NE) Reformation R-HSA-2995383	1/19	0.696189	0.998968	0.858823	0.311009	TMPO
Listeria Monocytogenes Entry Into Host Cells R-HSA-8876384	1/19	0.696189	0.998968	0.858823	0.311009	STAM2
Metabolism Of Cofactors R-HSA-8978934	1/19	0.696189	0.998968	0.858823	0.311009	DHFR
Na+/Cl- Dependent Neurotransmitter Transporters R-HSA-442660	1/19	0.696189	0.998968	0.858823	0.311009	SLC6A14
Other Semaphorin Interactions R-HSA-416700	1/19	0.696189	0.998968	0.858823	0.311009	PLXNB3
Processive Synthesis On C-strand Of Telomere R-HSA-174414	1/19	0.696189	0.998968	0.858823	0.311009	FEN1
SUMOylation Of Transcription Factors R-HSA-3232118	1/19	0.696189	0.998968	0.858823	0.311009	SP3
Signaling By FGFR2 IIIa TM R-HSA-8851708	1/19	0.696189	0.998968	0.858823	0.311009	FGFR2
Signaling By KIT In Disease R-HSA-9669938	1/19	0.696189	0.998968	0.858823	0.311009	YES1
Signaling By PDGFR In Disease R-HSA-9671555	1/19	0.696189	0.998968	0.858823	0.311009	GOLGA4
Signaling To RAS R-HSA-167044	1/19	0.696189	0.998968	0.858823	0.311009	MAPK14
Synthesis, Secretion, And Deacylation Of Ghrelin R-HSA-422085	1/19	0.696189	0.998968	0.858823	0.311009	GCG
Transcription Of E2F Targets Under Negative Control By DREAM Complex R-HSA-1362277	1/19	0.696189	0.998968	0.858823	0.311009	MAX
Mitotic Prometaphase R-HSA-68877	10/186	0.699592	0.998968	0.877452	0.313477	CENPT;DYNC1LI1;KIF2A;PPP2R5E;HAUS7;CEP250;CDCA8;CENPP;CEP76;NINL
HCMV Early Events R-HSA-9609690	5/96	0.700564	0.998968	0.848878	0.30209	DYNC1LI1;H2BC4;H2AC19;USH2A;NUP58
DNA Repair R-HSA-73894	17/310	0.703684	0.998968	0.895588	0.314733	TIPIN;FEN1;XRCC2;H2BC4;H2AC19;GTF2H2;FANCE;RAD23B;GTF2H5;COPS4;COPS5;MSH2;FANCD2;ERCC2;POLL;POLK;FAN1
Degradation Of GLI1 By Proteasome R-HSA-5610780	3/59	0.703703	0.998968	0.827838	0.290901	PSMD12;PSMB5;PSMD14
Degradation Of GLI2 By Proteasome R-HSA-5610783	3/59	0.703703	0.998968	0.827838	0.290901	PSMD12;PSMB5;PSMD14
GLI3 Is Processed To GLI3R By Proteasome R-HSA-5610785	3/59	0.703703	0.998968	0.827838	0.290901	PSMD12;PSMB5;PSMD14
Role Of GTSE1 In G2/M Progression After G2 Checkpoint R-HSA-8852276	3/59	0.703703	0.998968	0.827838	0.290901	PSMD12;PSMB5;PSMD14
M Phase R-HSA-68886	21/380	0.7051	0.998968	0.902717	0.315423	CENPT;RAB2A;RAB1A;PSMD12;PSMD14;H2BC4;H2AC19;CDCA8;ANAPC10;DYNC1LI1;SPAST;PSMB5;KIF2A;PPP2R5E;HAUS7;CEP250;CENPP;CEP76;NINL;NUP58;TMPO
FCERI Mediated NF-kB Activation R-HSA-2871837	4/78	0.705306	0.998968	0.835182	0.291582	PSMD12;PSMB5;PSMD14;RASGRP4
Nuclear Events Mediated By NFE2L2 R-HSA-9759194	4/78	0.705306	0.998968	0.835182	0.291582	PSMD12;PSMB5;PSMD14;TKT
Oncogenic MAPK Signaling R-HSA-6802957	4/78	0.705306	0.998968	0.835182	0.291582	RAP1B;CAMK2A;VCL;QKI
Amine Ligand-Binding Receptors R-HSA-375280	2/40	0.707883	0.998968	0.813425	0.281019	CHRM5;DRD2
Class C/3 (Metabotropic Glutamate/Pheromone Receptors) R-HSA-420499	2/40	0.707883	0.998968	0.813425	0.281019	GRM3;TAS2R31
RET Signaling R-HSA-8853659	2/40	0.707883	0.998968	0.813425	0.281019	PLCG1;GFRA4
Cell Surface Interactions At Vascular Wall R-HSA-202733	7/134	0.71224	0.998968	0.851319	0.288887	VPREB1;YES1;PICK1;ATP1B3;PLCG1;APOB;S100A9
MAPK1/MAPK3 Signaling R-HSA-5684996	15/277	0.714138	0.998968	0.883731	0.297533	MPP2;PSMD12;PSMD14;CAMK2A;RANBP9;WDR83;RASAL2;RASGRP4;GFRA4;RAP1B;PSMB5;NRG3;PPP2R5E;VCL;FGFR2
Formation Of beta-catenin:TCF Transactivating Complex R-HSA-201722	3/60	0.71449	0.998968	0.813271	0.273411	H2BC4;H2AC19;CDC73
Aberrant Regulation Of Mitotic Exit In Cancer Due To RB1 Defects R-HSA-9687136	1/20	0.714663	0.998968	0.813578	0.273317	ANAPC10
Conversion From APC/C:Cdc20 To APC/C:Cdh1 In Late Anaphase R-HSA-176407	1/20	0.714663	0.998968	0.813578	0.273317	ANAPC10
Diseases Associated With N-glycosylation Of Proteins R-HSA-3781860	1/20	0.714663	0.998968	0.813578	0.273317	RFT1
FGFR2 Ligand Binding And Activation R-HSA-190241	1/20	0.714663	0.998968	0.813578	0.273317	FGFR2
Lagging Strand Synthesis R-HSA-69186	1/20	0.714663	0.998968	0.813578	0.273317	FEN1
NOTCH4 Intracellular Domain Regulates Transcription R-HSA-9013695	1/20	0.714663	0.998968	0.813578	0.273317	HEY2
Nef-mediated Downmodulation Of Cell Surface Receptors By Recruitment To Clathrin Adapters R-HSA-164938	1/20	0.714663	0.998968	0.813578	0.273317	AP1G1
Phosphorylation Of APC/C R-HSA-176412	1/20	0.714663	0.998968	0.813578	0.273317	ANAPC10
Receptor-type Tyrosine-Protein Phosphatases R-HSA-388844	1/20	0.714663	0.998968	0.813578	0.273317	SLITRK3
Signaling By Hippo R-HSA-2028269	1/20	0.714663	0.998968	0.813578	0.273317	TJP2
TP53 Regulates Transcription Of Genes Involved In Cytochrome C Release R-HSA-6803204	1/20	0.714663	0.998968	0.813578	0.273317	BNIP3L
Amyloid Fiber Formation R-HSA-977225	4/79	0.714738	0.998968	0.824002	0.276732	PRKN;H2BC4;H2AC19;IAPP
Downstream Signaling Events Of B Cell Receptor (BCR) R-HSA-1168372	4/79	0.714738	0.998968	0.824002	0.276732	PPP3CB;PSMD12;PSMB5;PSMD14
Hedgehog Off State R-HSA-5610787	5/98	0.717638	0.998968	0.830534	0.275563	DYNC2H1;PSMD12;PSMB5;PSMD14;SMOX
RUNX1 Regulates Transcription Of Genes Involved In Differentiation Of HSCs R-HSA-8939236	5/98	0.717638	0.998968	0.830534	0.275563	PSMD12;PSMB5;PSMD14;H2BC4;H2AC19
Intraflagellar Transport R-HSA-5620924	2/41	0.720705	0.998968	0.792525	0.259572	DYNC2H1;IFT81
Regulation Of Beta-Cell Development R-HSA-186712	2/41	0.720705	0.998968	0.792525	0.259572	PDHX;IAPP
Signaling By Retinoic Acid R-HSA-5362517	2/41	0.720705	0.998968	0.792525	0.259572	PDHX;RDH10
Cell Cycle, Mitotic R-HSA-69278	29/523	0.722573	0.998968	0.905365	0.294187	RAB1A;FEN1;PSMD12;PSMD14;MAX;H2AC19;CDCA8;ANAPC10;CKS1B;ORC5;ORC4;PSMB5;SPAST;HAUS7;PPP2R5E;CEP250;CEP76;NINL;E2F6;TMPO;CENPT;RAB2A;CDKN2C;H2BC4;DHFR;DYNC1LI1;KIF2A;CENPP;NUP58
COPI-mediated Anterograde Transport R-HSA-6807878	4/80	0.723947	0.998968	0.813117	0.262667	DYNC1LI1;RAB1A;COG8;CAPZA2
Recruitment Of NuMA To Mitotic Centrosomes R-HSA-380320	4/80	0.723947	0.998968	0.813117	0.262667	HAUS7;CEP250;NINL;CEP76
Regulation Of APC/C Activators Between G1/S And Early Anaphase R-HSA-176408	4/80	0.723947	0.998968	0.813117	0.262667	PSMD12;PSMB5;PSMD14;ANAPC10
Phospholipid Metabolism R-HSA-1483257	11/208	0.724736	0.998968	0.86205	0.277535	PGS1;PLA2G12A;PNPLA8;MTMR14;GDE1;PLA2G3;PLA2G4A;PLAAT3;PLEKHA3;CHPT1;CRLS1
Dectin-1 Mediated Noncanonical NF-kB Signaling R-HSA-5607761	3/61	0.72497	0.998968	0.799206	0.257045	PSMD12;PSMB5;PSMD14
CLEC7A (Dectin-1) Signaling R-HSA-5607764	5/99	0.72591	0.998968	0.821655	0.2632	PSMD12;PPP3CB;PSMB5;PSMD14;CARD9
SLC Transporter Disorders R-HSA-5619102	5/99	0.72591	0.998968	0.821655	0.2632	SLC34A2;SLC2A10;SLC6A14;SLC12A1;NUP58
Azathioprine ADME R-HSA-9748787	1/21	0.732014	0.998968	0.772858	0.241097	NUDT15
Cobalamin (Cbl, Vitamin B12) Transport And Metabolism R-HSA-196741	1/21	0.732014	0.998968	0.772858	0.241097	MMUT
Defects In Vitamin And Cofactor Metabolism R-HSA-3296482	1/21	0.732014	0.998968	0.772858	0.241097	MMUT
Deregulated CDK5 Triggers Neurodegenerative Pathways In Alzheimers Disease Models R-HSA-8862803	1/21	0.732014	0.998968	0.772858	0.241097	CAPN2
ER Quality Control Compartment (ERQC) R-HSA-901032	1/21	0.732014	0.998968	0.772858	0.241097	DERL2
Inactivation Of APC/C Via Direct Inhibition Of APC/C Complex R-HSA-141430	1/21	0.732014	0.998968	0.772858	0.241097	ANAPC10
Inflammasomes R-HSA-622312	1/21	0.732014	0.998968	0.772858	0.241097	SUGT1
Initial Triggering Of Complement R-HSA-166663	1/21	0.732014	0.998968	0.772858	0.241097	COLEC10
NOTCH2 Activation And Transmission Of Signal To Nucleus R-HSA-2979096	1/21	0.732014	0.998968	0.772858	0.241097	JAG1
PCNA-Dependent Long Patch Base Excision Repair R-HSA-5651801	1/21	0.732014	0.998968	0.772858	0.241097	FEN1
SHC1 Events In ERBB2 Signaling R-HSA-1250196	1/21	0.732014	0.998968	0.772858	0.241097	NRG3
Signaling By FGFR3 In Disease R-HSA-5655332	1/21	0.732014	0.998968	0.772858	0.241097	PLCG1
Synthesis, Secretion, And Inactivation Of Glucagon-like Peptide-1 (GLP-1) R-HSA-381771	1/21	0.732014	0.998968	0.772858	0.241097	GCG
TP53 Regulates Transcription Of Additional Cell Cycle Genes With Uncertain Roles In P53 Pathway R-HSA-6804115	1/21	0.732014	0.998968	0.772858	0.241097	CNOT9
VxPx Cargo-Targeting To Cilium R-HSA-5620916	1/21	0.732014	0.998968	0.772858	0.241097	RAB11A
Centrosome Maturation R-HSA-380287	4/81	0.732933	0.998968	0.802514	0.249342	HAUS7;CEP250;NINL;CEP76
Activation Of Gene Expression By SREBF (SREBP) R-HSA-2426168	2/42	0.733048	0.998968	0.772671	0.239948	DAND5;TM7SF2
Cleavage Of Damaged Pyrimidine R-HSA-110329	2/42	0.733048	0.998968	0.772671	0.239948	H2BC4;H2AC19
Defective Pyroptosis R-HSA-9710421	2/42	0.733048	0.998968	0.772671	0.239948	H2BC4;H2AC19
Glucagon-like Peptide-1 (GLP1) Regulates Insulin Secretion R-HSA-381676	2/42	0.733048	0.998968	0.772671	0.239948	GCG;RAPGEF3
NS1 Mediated Effects On Host Pathways R-HSA-168276	2/42	0.733048	0.998968	0.772671	0.239948	KPNA4;NUP58
PRC2 Methylates Histones And DNA R-HSA-212300	2/42	0.733048	0.998968	0.772671	0.239948	H2BC4;H2AC19
Signaling By FGFR2 In Disease R-HSA-5655253	2/42	0.733048	0.998968	0.772671	0.239948	PLCG1;FGFR2
tRNA Aminoacylation R-HSA-379724	2/42	0.733048	0.998968	0.772671	0.239948	PPA2;YARS2
Asymmetric Localization Of PCP Proteins R-HSA-4608870	3/62	0.735147	0.998968	0.785618	0.241723	PSMD12;PSMB5;PSMD14
MAP Kinase Activation R-HSA-450294	3/62	0.735147	0.998968	0.785618	0.241723	RPS6KA5;IRAK2;MAPK14
MAPK Family Signaling Cascades R-HSA-5683057	17/318	0.741534	0.998968	0.871408	0.260581	MPP2;PSMD12;PSMD14;CAMK2A;RANBP9;WDR83;RASAL2;KALRN;RASGRP4;GFRA4;RAP1B;PSMB5;NRG3;PPP2R5E;PKN2;VCL;FGFR2
Condensation Of Prophase Chromosomes R-HSA-2299718	2/43	0.744924	0.998968	0.753785	0.22197	H2BC4;H2AC19
Defensins R-HSA-1461973	2/43	0.744924	0.998968	0.753785	0.22197	DEFB126;PRSS2
GPER1 Signaling R-HSA-9634597	2/43	0.744924	0.998968	0.753785	0.22197	GNAZ;GNAI1
Retinoid Metabolism And Transport R-HSA-975634	2/43	0.744924	0.998968	0.753785	0.22197	LPL;APOB
ADP Signaling Thru P2Y Purinoceptor 12 R-HSA-392170	1/22	0.748311	0.998968	0.736016	0.213398	GNAI1
Common Pathway Of Fibrin Clot Formation R-HSA-140875	1/22	0.748311	0.998968	0.736016	0.213398	F5
Cytosolic Sulfonation Of Small Molecules R-HSA-156584	1/22	0.748311	0.998968	0.736016	0.213398	SULT4A1
Nephrin Family Interactions R-HSA-373753	1/22	0.748311	0.998968	0.736016	0.213398	KIRREL3
RA Biosynthesis Pathway R-HSA-5365859	1/22	0.748311	0.998968	0.736016	0.213398	RDH10
RNA Polymerase III Transcription Termination R-HSA-73980	1/22	0.748311	0.998968	0.736016	0.213398	POLR3H
SHC-mediated cascade:FGFR2 R-HSA-5654699	1/22	0.748311	0.998968	0.736016	0.213398	FGFR2
Antiviral Mechanism By IFN-stimulated Genes R-HSA-1169410	4/83	0.750241	0.998968	0.782113	0.224749	EIF4E3;KPNA4;PLCG1;NUP58
HCMV Infection R-HSA-9609646	6/121	0.751094	0.998968	0.805696	0.230611	DYNC1LI1;H2BC4;H2AC19;SNF8;USH2A;NUP58
Base-Excision Repair, AP Site Formation R-HSA-73929	2/44	0.756343	0.998968	0.735799	0.205479	H2BC4;H2AC19
TGF-beta Receptor Signaling Activates SMADs R-HSA-2173789	2/44	0.756343	0.998968	0.735799	0.205479	NEDD4L;UCHL5
C-type Lectin Receptors (CLRs) R-HSA-5621481	7/141	0.760097	0.998968	0.806545	0.221243	PSMD12;PPP3CB;RPS6KA5;PSMB5;PSMD14;CARD9;PKN2
Dopamine Neurotransmitter Release Cycle R-HSA-212676	1/23	0.763618	0.998968	0.702524	0.189462	SYN2
Nucleotide Salvage R-HSA-8956321	1/23	0.763618	0.998968	0.702524	0.189462	ADAL
PI-3K cascade:FGFR2 R-HSA-5654695	1/23	0.763618	0.998968	0.702524	0.189462	FGFR2
Signaling By NTRK2 (TRKB) R-HSA-9006115	1/23	0.763618	0.998968	0.702524	0.189462	PLCG1
p53-Dependent G1 DNA Damage Response R-HSA-69563	3/65	0.763893	0.998968	0.747485	0.201319	PSMD12;PSMB5;PSMD14
Regulation Of IGF Transport And Uptake By IGFBPs R-HSA-381426	6/123	0.764882	0.998968	0.791839	0.212239	LGALS1;PENK;APOB;HSP90B1;F5;KTN1
Beta-catenin Independent WNT Signaling R-HSA-3858494	7/142	0.766439	0.998968	0.800527	0.212941	PSMD12;PPP3CB;PSMB5;WNT5B;PSMD14;CAMK2A;RHOA
ERCC6 (CSB) And EHMT2 (G9a) Positively Regulate rRNA Expression R-HSA-427389	2/45	0.767318	0.998968	0.718649	0.190337	H2BC4;H2AC19
SUMOylation Of DNA Replication Proteins R-HSA-4615885	2/45	0.767318	0.998968	0.718649	0.190337	CDCA8;NUP58
TAK1-dependent IKK And NF-kappa-B Activation R-HSA-445989	2/45	0.767318	0.998968	0.718649	0.190337	USP14;IRAK2
TCF Dependent Signaling In Response To WNT R-HSA-201681	10/198	0.769615	0.998968	0.820915	0.214968	SOX3;USP8;PSMD12;PSMB5;PSMD14;WNT3A;PPP2R5E;H2BC4;H2AC19;CDC73
Activation Of NF-kappaB In B Cells R-HSA-1169091	3/66	0.772893	0.998968	0.735581	0.189496	PSMD12;PSMB5;PSMD14
Transport Of Bile Salts And Organic Acids, Metal Ions And Amine Compounds R-HSA-425366	4/86	0.774569	0.998968	0.753379	0.192449	SLC13A3;SLC22A15;SLC30A2;SLC6A14
Platelet Activation, Signaling And Aggregation R-HSA-76002	13/254	0.776296	0.998968	0.832195	0.21073	TRPC6;OLA1;PLA2G4A;MAPK14;RHOA;GNAI1;MANF;F5;RAP1B;GNA12;CD36;RAPGEF3;VCL
XBP1(S) Activates Chaperone Genes R-HSA-381038	2/46	0.77786	0.998968	0.702278	0.176418	MYDGF;DNAJB9
APC/C:Cdc20 Mediated Degradation Of Cyclin B R-HSA-174048	1/24	0.777995	0.998968	0.671943	0.168681	ANAPC10
DARPP-32 Events R-HSA-180024	1/24	0.777995	0.998968	0.671943	0.168681	PPP3CB
Defective Intrinsic Pathway For Apoptosis R-HSA-9734009	1/24	0.777995	0.998968	0.671943	0.168681	CAPN2
Downstream Signaling Of Activated FGFR3 R-HSA-5654708	1/24	0.777995	0.998968	0.671943	0.168681	PLCG1
FRS-mediated FGFR2 Signaling R-HSA-5654700	1/24	0.777995	0.998968	0.671943	0.168681	FGFR2
Glycogen Metabolism R-HSA-8982491	1/24	0.777995	0.998968	0.671943	0.168681	PGM1
Impaired BRCA2 Binding To PALB2 R-HSA-9709603	1/24	0.777995	0.998968	0.671943	0.168681	XRCC2
Incretin Synthesis, Secretion, And Inactivation R-HSA-400508	1/24	0.777995	0.998968	0.671943	0.168681	GCG
Interleukin-6 Family Signaling R-HSA-6783589	1/24	0.777995	0.998968	0.671943	0.168681	IL31RA
MicroRNA (miRNA) Biogenesis R-HSA-203927	1/24	0.777995	0.998968	0.671943	0.168681	TARBP2
Signaling By EGFR In Cancer R-HSA-1643713	1/24	0.777995	0.998968	0.671943	0.168681	PLCG1
Signaling By Erythropoietin R-HSA-9006335	1/24	0.777995	0.998968	0.671943	0.168681	PLCG1
HATs Acetylate Histones R-HSA-3214847	5/106	0.778931	0.998968	0.764422	0.190977	ING5;TAF6L;H2BC4;H2AC19;DMAP1
Class A/1 (Rhodopsin-like Receptors) R-HSA-373076	17/327	0.780248	0.998968	0.845697	0.209854	GPR37;PPAN-P2RY11;PTGER3;CHRM5;CXCR5;TACR3;OPRK1;GPR37L1;TRH;HCAR1;PENK;CXCR2;PROK2;S1PR3;AGTR2;DRD2;CCR3
G1/S DNA Damage Checkpoints R-HSA-69615	3/67	0.781611	0.998968	0.724049	0.178405	PSMD12;PSMB5;PSMD14
APC/C-mediated Degradation Of Cell Cycle Proteins R-HSA-174143	4/87	0.782251	0.998968	0.744262	0.182775	PSMD12;PSMB5;PSMD14;ANAPC10
Regulation Of PLK1 Activity At G2/M Transition R-HSA-2565942	4/87	0.782251	0.998968	0.744262	0.182775	HAUS7;CEP250;NINL;CEP76
Hemostasis R-HSA-109582	31/576	0.784132	0.998968	0.876271	0.21309	OLA1;GNAI1;RAP1B;VPREB1;KIF19;PPP2R5E;GNA12;MFN1;MFN2;KIF21A;PLCG1;CD36;APOB;TRPC6;YES1;PLA2G4A;ATP1B3;MAPK14;CABLES2;RHOA;F5;MANF;KIF9;KIF18B;KIF2A;ITGA10;CAPZA2;PICK1;S100A9;RAPGEF3;VCL
Transport To Golgi And Subsequent Modification R-HSA-948021	8/164	0.785964	0.998968	0.791494	0.190627	DYNC1LI1;RAB1A;COG8;SEC23A;SEC23IP;CAPZA2;SEC22B;F5
Cyclin D Associated Events In G1 R-HSA-69231	2/47	0.787982	0.998968	0.686636	0.163612	CDKN2C;CKS1B
G Alpha (Z) Signaling Events R-HSA-418597	2/47	0.787982	0.998968	0.686636	0.163612	GNAZ;GNAI1
Metabolism Of Fat-Soluble Vitamins R-HSA-6806667	2/47	0.787982	0.998968	0.686636	0.163612	LPL;APOB
SUMOylation Of RNA Binding Proteins R-HSA-4570464	2/47	0.787982	0.998968	0.686636	0.163612	CBX2;NUP58
Meiosis R-HSA-1500620	4/88	0.789724	0.998968	0.735362	0.173598	SYCP2;H2BC4;H2AC19;FKBP6
Costimulation By CD28 Family R-HSA-388841	3/68	0.79005	0.998968	0.712871	0.167995	YES1;PPP2R5E;PKN2
Cellular Senescence R-HSA-2559583	8/165	0.79147	0.998968	0.78641	0.183913	CDKN2C;CBX2;H2BC4;H2AC19;MAPK14;ANAPC10;DAND5;VENTX
Basigin Interactions R-HSA-210991	1/25	0.791498	0.998968	0.643911	0.150565	ATP1B3
Defective HDR Thru Homologous Recombination (HRR) Due To BRCA1 Loss-Of-Function R-HSA-9701192	1/25	0.791498	0.998968	0.643911	0.150565	XRCC2
G Beta:Gamma Signaling Thru PI3Kgamma R-HSA-392451	1/25	0.791498	0.998968	0.643911	0.150565	RHOA
Gap Junction Trafficking R-HSA-190828	1/25	0.791498	0.998968	0.643911	0.150565	MYO6
Gap-filling DNA Repair Synthesis And Ligation In GG-NER R-HSA-5696397	1/25	0.791498	0.998968	0.643911	0.150565	POLK
NOTCH3 Activation And Transmission Of Signal To Nucleus R-HSA-9013507	1/25	0.791498	0.998968	0.643911	0.150565	JAG1
NOTCH3 Intracellular Domain Regulates Transcription R-HSA-9013508	1/25	0.791498	0.998968	0.643911	0.150565	HEY2
Resolution Of AP Sites Via Multiple-Nucleotide Patch Replacement Pathway R-HSA-110373	1/25	0.791498	0.998968	0.643911	0.150565	FEN1
Termination Of O-glycan Biosynthesis R-HSA-977068	1/25	0.791498	0.998968	0.643911	0.150565	ST3GAL1
Signaling By NOTCH R-HSA-157118	10/203	0.795127	0.998968	0.799432	0.183272	CDK8;PSMD12;JAG1;PSMB5;PSMD14;HEY2;H2BC4;H2AC19;CCNC;HDAC9
Antimicrobial Peptides R-HSA-6803157	4/89	0.79699	0.998968	0.726672	0.164891	DEFB126;PRSS2;S100A9;S100A8
IRE1alpha Activates Chaperones R-HSA-381070	2/48	0.797694	0.998968	0.671673	0.151818	MYDGF;DNAJB9
Inhibition Of DNA Recombination At Telomere R-HSA-9670095	2/48	0.797694	0.998968	0.671673	0.151818	H2BC4;H2AC19
Circadian Clock R-HSA-400253	3/69	0.798216	0.998968	0.702033	0.158221	NFIL3;BMAL1;NPAS2
Interleukin-17 Signaling R-HSA-448424	3/69	0.798216	0.998968	0.702033	0.158221	RPS6KA5;IRAK2;MAPK14
Chaperonin-mediated Protein Folding R-HSA-390466	4/90	0.804052	0.998968	0.718184	0.15663	VBP1;KIF13A;FBXL5;CCT5
APC-Cdc20 Mediated Degradation Of Nek2A R-HSA-179409	1/26	0.80418	0.998968	0.618122	0.134709	ANAPC10
Attenuation Phase R-HSA-3371568	1/26	0.80418	0.998968	0.618122	0.134709	HSPH1
Calnexin/calreticulin Cycle R-HSA-901042	1/26	0.80418	0.998968	0.618122	0.134709	DERL2
Cholesterol Biosynthesis R-HSA-191273	1/26	0.80418	0.998968	0.618122	0.134709	TM7SF2
Downstream Signaling Of Activated FGFR4 R-HSA-5654716	1/26	0.80418	0.998968	0.618122	0.134709	PLCG1
Formation Of Tubulin Folding Intermediates By CCT/TriC R-HSA-389960	1/26	0.80418	0.998968	0.618122	0.134709	CCT5
HDMs Demethylate Histones R-HSA-3214842	1/26	0.80418	0.998968	0.618122	0.134709	KDM5B
Insulin Receptor Recycling R-HSA-77387	1/26	0.80418	0.998968	0.618122	0.134709	ATP6V1G2
Metal Ion SLC Transporters R-HSA-425410	1/26	0.80418	0.998968	0.618122	0.134709	SLC30A2
Platelet Calcium Homeostasis R-HSA-418360	1/26	0.80418	0.998968	0.618122	0.134709	TRPC6
Pyroptosis R-HSA-5620971	1/26	0.80418	0.998968	0.618122	0.134709	GSDMD
RNA Polymerase III Transcription Initiation From Type 2 Promoter R-HSA-76066	1/26	0.80418	0.998968	0.618122	0.134709	POLR3H
Role Of Phospholipids In Phagocytosis R-HSA-2029485	1/26	0.80418	0.998968	0.618122	0.134709	PLCG1
Signaling By ALK R-HSA-201556	1/26	0.80418	0.998968	0.618122	0.134709	PLCG1
Synthesis Of IP3 And IP4 In Cytosol R-HSA-1855204	1/26	0.80418	0.998968	0.618122	0.134709	PLCG1
Signaling By EGFR R-HSA-177929	2/49	0.80701	0.998968	0.657347	0.140948	PLCG1;STAM2
Signaling By NOTCH3 R-HSA-9012852	2/49	0.80701	0.998968	0.657347	0.140948	JAG1;HEY2
mRNA Splicing - Minor Pathway R-HSA-72165	2/49	0.80701	0.998968	0.657347	0.140948	SNRPG;TXNL4A
Diseases Of Signal Transduction By Growth Factor Receptors And Second Messengers R-HSA-5663202	22/424	0.807512	0.998968	0.843281	0.180291	PSMD12;JAG1;YES1;CTBP2;PSMD14;WNT3A;CAMK2A;DERL2;CCNC;HDAC9;QKI;RAP1B;CDK8;ERLEC1;GOLGA4;PSMB5;NRG3;PPP2R5E;HEY2;PLCG1;VCL;FGFR2
HCMV Late Events R-HSA-9610379	4/91	0.810913	0.998968	0.709891	0.148789	H2BC4;H2AC19;SNF8;NUP58
Diseases Of Programmed Cell Death R-HSA-9645723	3/71	0.813752	0.998968	0.681312	0.140418	H2BC4;H2AC19;CAPN2
ATF4 Activates Genes In Response To Endoplasmic Reticulum Stress R-HSA-380994	1/27	0.816092	0.998968	0.594316	0.120782	EXOSC4
Effects Of PIP2 Hydrolysis R-HSA-114508	1/27	0.816092	0.998968	0.594316	0.120782	TRPC6
Endogenous Sterols R-HSA-211976	1/27	0.816092	0.998968	0.594316	0.120782	AHRR
G0 And Early G1 R-HSA-1538133	1/27	0.816092	0.998968	0.594316	0.120782	MAX
Gap Junction Trafficking And Regulation R-HSA-157858	1/27	0.816092	0.998968	0.594316	0.120782	MYO6
Postmitotic Nuclear Pore Complex (NPC) Reformation R-HSA-9615933	1/27	0.816092	0.998968	0.594316	0.120782	NUP58
RNA Polymerase III Transcription Initiation From Type 1 Promoter R-HSA-76061	1/27	0.816092	0.998968	0.594316	0.120782	POLR3H
Resolution Of D-loop Structures Thru Synthesis-Dependent Strand Annealing (SDSA) R-HSA-5693554	1/27	0.816092	0.998968	0.594316	0.120782	XRCC2
Synthesis Of PC R-HSA-1483191	1/27	0.816092	0.998968	0.594316	0.120782	CHPT1
VEGFR2 Mediated Vascular Permeability R-HSA-5218920	1/27	0.816092	0.998968	0.594316	0.120782	PKN2
Base Excision Repair R-HSA-73884	3/72	0.821132	0.998968	0.671402	0.132314	FEN1;H2BC4;H2AC19
Interleukin-1 Family Signaling R-HSA-446652	7/152	0.8232	0.998968	0.744919	0.144928	GSDMD;USP14;PSMD12;IL36A;PSMB5;PSMD14;IRAK2
VEGFA-VEGFR2 Pathway R-HSA-4420097	4/93	0.824046	0.998968	0.693864	0.134283	PKN2;PLCG1;MAPK14;RHOA
Diseases Of DNA Repair R-HSA-9675135	2/51	0.824502	0.998968	0.630449	0.121661	MSH2;XRCC2
Nonhomologous End-Joining (NHEJ) R-HSA-5693571	2/51	0.824502	0.998968	0.630449	0.121661	H2BC4;POLL
Synthesis Of PIPs At Plasma Membrane R-HSA-1660499	2/51	0.824502	0.998968	0.630449	0.121661	MTMR14;PLEKHA3
Translocation Of SLC2A4 (GLUT4) To Plasma Membrane R-HSA-1445148	2/51	0.824502	0.998968	0.630449	0.121661	RAB10;RAB11A
SLC-mediated Transmembrane Transport R-HSA-425407	12/247	0.825493	0.998968	0.787393	0.151002	SLC34A2;SLC13A3;SLC22A15;SLC12A5;SLC43A2;SLC2A10;SLC30A2;SLC6A14;SLC12A1;SLC38A3;SLC2A6;SLC25A4
Disease R-HSA-1643685	97/1736	0.82665	0.998968	0.90764	0.172791	RPL4;H2AC19;CCNC;RPL9;RPL7;IPO5;GPR176;GOLGA4;CAPN2;KPNA4;MMUT;RPS13;SLC34A2;S100A1;SLC6A14;ATP1B3;HLA-G;TUFM;DPM1;DYNC1LI1;MSH2;SNRPG;IAPP;GEMIN7;S100A9;STAM2;S100A8;VCL;GNAZ;PMEL;PSMD12;CALCRL;PSMD14;CTBP2;NEDD4L;MRPL13;ANAPC10;GTF2E2;RAP1B;IRAK2;PLCG1;ST3GAL1;STRA6;GSDMD;RPL39L;GPR15;JAG1;YES1;PPAN-P2RY11;WNT3A;XRCC2;ABCA4;PMM2;SNF8;QKI;CDK8;FXYD2;NAPEPLD;FGFR2;FEN1;AP1G1;PPP2R5E;HEY2;CD36;ELO…
DAP12 Signaling R-HSA-2424491	1/28	0.827279	0.998968	0.572274	0.108511	PLCG1
Downstream Signal Transduction R-HSA-186763	1/28	0.827279	0.998968	0.572274	0.108511	PLCG1
Keratan Sulfate Biosynthesis R-HSA-2022854	1/28	0.827279	0.998968	0.572274	0.108511	ST3GAL1
MET Promotes Cell Motility R-HSA-8875878	1/28	0.827279	0.998968	0.572274	0.108511	RAP1B
Metabolism Of Porphyrins R-HSA-189445	1/28	0.827279	0.998968	0.572274	0.108511	UROS
Molecules Associated With Elastic Fibres R-HSA-2129379	1/28	0.827279	0.998968	0.572274	0.108511	FBLN1
Notch-HLH Transcription Pathway R-HSA-350054	1/28	0.827279	0.998968	0.572274	0.108511	HDAC9
Paracetamol ADME R-HSA-9753281	1/28	0.827279	0.998968	0.572274	0.108511	SLC38A3
Recycling Pathway Of L1 R-HSA-437239	1/28	0.827279	0.998968	0.572274	0.108511	RPS6KA5
Extra-nuclear Estrogen Signaling R-HSA-9009391	3/73	0.828261	0.998968	0.661775	0.124696	CAV2;S1PR3;GNAI1
Interleukin-1 Signaling R-HSA-9020702	5/114	0.829437	0.998968	0.708014	0.132404	USP14;PSMD12;PSMB5;PSMD14;IRAK2
Apoptotic Execution Phase R-HSA-75153	2/52	0.832703	0.998968	0.617807	0.113107	PKN2;TJP2
Gene Expression (Transcription) R-HSA-74160	80/1449	0.834768	0.998968	0.896683	0.161942	KDM5B;COX7B;TP53RK;ZNF490;H2AC19;CCNC;RORB;CTSV;MED16;COX6A1;CDC73;RRP8;SNAPC5;ING5;SNAPC1;ZNF649;HEY2;ELOC;YAF2;VENTX;BNIP3L;RABGGTB;MED7;MSH2;FANCD2;SNRPG;ANG;ZNF556;KCTD15;NUP58;FKBP6;PSMD12;PSMD14;MAX;UHRF1;CTR9;CAMK2A;TWIST2;NEDD4L;TWIST1;ZNF3;COX5A;SUPT6H;HDAC9;ANAPC10;GTF2E2;HSPD1;PSMB5;MED31;ZNF626;MOV10L1;NRBF2;DMAP1;RFFL;E2F6;ESRRA;JAG1;YES1;CRADD;INTS3;CBX2;H2BC4;OPRK1;GTF2H2;FBXO32;CO…
Formation Of Cornified Envelope R-HSA-6809371	3/74	0.835145	0.998968	0.652419	0.117533	KLK14;LCE1E;KLK12
Transcriptional Regulation By RUNX3 R-HSA-8878159	4/95	0.836415	0.998968	0.678542	0.121209	PSMD12;PSMB5;JAG1;PSMD14
RNA Polymerase II Transcription R-HSA-73857	72/1312	0.836611	0.998968	0.891288	0.159002	KDM5B;COX7B;TP53RK;ZNF490;H2AC19;CCNC;RORB;CTSV;MED16;COX6A1;CDC73;SNAPC5;ING5;SNAPC1;ZNF649;HEY2;ELOC;YAF2;VENTX;BNIP3L;RABGGTB;MED7;MSH2;FANCD2;SNRPG;ZNF556;KCTD15;PSMD12;PSMD14;MAX;CTR9;CAMK2A;TWIST2;NEDD4L;TWIST1;ZNF3;COX5A;SUPT6H;HDAC9;ANAPC10;GTF2E2;HSPD1;PSMB5;MED31;ZNF626;NRBF2;DMAP1;RFFL;E2F6;ESRRA;JAG1;YES1;CRADD;INTS3;CBX2;H2BC4;OPRK1;GTF2H2;FBXO32;COX6C;MAPK14;GTF2H5;POU4F2;CDK8;ZNF74…
Budding And Maturation Of HIV Virion R-HSA-162588	1/29	0.837786	0.998968	0.551806	0.0976654	NEDD4L
FOXO-mediated Transcription Of Oxidative Stress, Metabolic And Neuronal Genes R-HSA-9615017	1/29	0.837786	0.998968	0.551806	0.0976654	FBXO32
HSF1 Activation R-HSA-3371511	1/29	0.837786	0.998968	0.551806	0.0976654	HSPH1
Interaction Between L1 And Ankyrins R-HSA-445095	1/29	0.837786	0.998968	0.551806	0.0976654	SCN3B
Processing Of Capped Intronless Pre-mRNA R-HSA-75067	1/29	0.837786	0.998968	0.551806	0.0976654	SNRPG
Regulation Of TP53 Activity Thru Acetylation R-HSA-6804758	1/29	0.837786	0.998968	0.551806	0.0976654	ING5
Surfactant Metabolism R-HSA-5683826	1/29	0.837786	0.998968	0.551806	0.0976654	SLC34A2
TCR Signaling R-HSA-202403	5/116	0.840485	0.998968	0.695183	0.120807	PSMD12;PSMB5;PSMD14;PKN2;PLCG1
Nuclear Envelope Breakdown R-HSA-2980766	2/53	0.840556	0.998968	0.605661	0.105199	NUP58;TMPO
Nuclear Envelope (NE) Reassembly R-HSA-2995410	3/75	0.84179	0.998968	0.643324	0.110796	SPAST;NUP58;TMPO
MyD88 Cascade Initiated On Plasma Membrane R-HSA-975871	4/96	0.842321	0.998968	0.671131	0.115162	USP14;RPS6KA5;IRAK2;MAPK14
Protein Folding R-HSA-391251	4/96	0.842321	0.998968	0.671131	0.115162	VBP1;KIF13A;FBXL5;CCT5
Cell Cycle Checkpoints R-HSA-69620	13/271	0.845657	0.998968	0.776648	0.130198	CENPT;PSMD12;PSMD14;H2BC4;CDCA8;ANAPC10;ORC5;DYNC1LI1;ORC4;PSMB5;KIF2A;PPP2R5E;CENPP
Downstream Signaling Of Activated FGFR1 R-HSA-5654687	1/30	0.847655	0.998968	0.53275	0.0880537	PLCG1
HS-GAG Biosynthesis R-HSA-2022928	1/30	0.847655	0.998968	0.53275	0.0880537	HS6ST3
Transcriptional Regulation Of Pluripotent Stem Cells R-HSA-452723	1/30	0.847655	0.998968	0.53275	0.0880537	EPHA1
Translation Of Structural Proteins R-HSA-9683701	1/30	0.847655	0.998968	0.53275	0.0880537	ST3GAL1
SUMOylation Of DNA Damage Response And Repair Proteins R-HSA-3108214	3/76	0.848202	0.998968	0.634477	0.104458	CBX2;NSMCE2;NUP58
Transcriptional Regulation By Small RNAs R-HSA-5578749	3/76	0.848202	0.998968	0.634477	0.104458	H2BC4;H2AC19;NUP58
SARS-CoV-2-host Interactions R-HSA-9705683	9/196	0.848265	0.998968	0.742198	0.122138	TOMM70;SEC23A;IRAK2;SNRPG;GEMIN7;HLA-G;RPS13;NUP58;TUFM
Chromosome Maintenance R-HSA-73886	5/118	0.850937	0.998968	0.682806	0.110217	CENPT;FEN1;H2BC4;H2AC19;CENPP
Complement Cascade R-HSA-166658	2/55	0.855266	0.998968	0.582744	0.0911078	COLEC10;C8A
Golgi Associated Vesicle Biogenesis R-HSA-432722	2/55	0.855266	0.998968	0.582744	0.0911078	AP1G1;SNX5
Intrinsic Pathway For Apoptosis R-HSA-109606	2/55	0.855266	0.998968	0.582744	0.0911078	AVEN;GSDMD
Signaling By ALK Fusions And Activated Point Mutants R-HSA-9725370	2/55	0.855266	0.998968	0.582744	0.0911078	PLCG1;VCL
PTEN Regulation R-HSA-6807070	6/139	0.855284	0.998968	0.695983	0.108797	USP13;PSMD12;PSMB5;PSMD14;CBX2;OTUD3
Homology Directed Repair R-HSA-5693538	5/119	0.855946	0.998968	0.67678	0.105272	TIPIN;FEN1;XRCC2;H2BC4;POLK
Activated NOTCH1 Transmits Signal To Nucleus R-HSA-2122948	1/31	0.856924	0.998968	0.514964	0.0795137	JAG1
DNA Strand Elongation R-HSA-69190	1/31	0.856924	0.998968	0.514964	0.0795137	FEN1
Downregulation Of SMAD2/3:SMAD4 Transcriptional Activity R-HSA-2173795	1/31	0.856924	0.998968	0.514964	0.0795137	NEDD4L
EGFR Downregulation R-HSA-182971	1/31	0.856924	0.998968	0.514964	0.0795137	STAM2
Pausing And Recovery Of Tat-mediated HIV Elongation R-HSA-167238	1/31	0.856924	0.998968	0.514964	0.0795137	ELOC
Regulation Of MECP2 Expression And Activity R-HSA-9022692	1/31	0.856924	0.998968	0.514964	0.0795137	CAMK2A
Sealing Of Nuclear Envelope (NE) By ESCRT-III R-HSA-9668328	1/31	0.856924	0.998968	0.514964	0.0795137	SPAST
Transferrin Endocytosis And Recycling R-HSA-917977	1/31	0.856924	0.998968	0.514964	0.0795137	ATP6V1G2
Cellular Response To Heat Stress R-HSA-3371556	4/99	0.858973	0.998968	0.649833	0.0987862	HSPH1;CAMK2A;HIKESHI;NUP58
L1CAM Interactions R-HSA-373760	4/99	0.858973	0.998968	0.649833	0.0987862	RPS6KA5;ITGA10;RANBP9;SCN3B
Meiotic Recombination R-HSA-912446	2/56	0.862147	0.998968	0.571921	0.0848331	H2BC4;H2AC19
KEAP1-NFE2L2 Pathway R-HSA-9755511	4/100	0.86418	0.998968	0.643029	0.0938659	PSMD12;PSMB5;PSMD14;TKT
SARS-CoV-2 Activates/Modulates Innate And Adaptive Immune Responses R-HSA-9705671	5/121	0.865544	0.998968	0.66504	0.0960302	TOMM70;SEC23A;IRAK2;HLA-G;NUP58
Defective TPR May Confer Susceptibility Towards Thyroid Papillary Carcinoma (TPC) R-HSA-5619107	1/32	0.865629	0.998968	0.498326	0.0719078	NUP58
G-protein Beta:Gamma Signaling R-HSA-397795	1/32	0.865629	0.998968	0.498326	0.0719078	RHOA
GPVI-mediated Activation Cascade R-HSA-114604	1/32	0.865629	0.998968	0.498326	0.0719078	RHOA
Glucagon Signaling In Metabolic Regulation R-HSA-163359	1/32	0.865629	0.998968	0.498326	0.0719078	GCG
Inactivation, Recovery And Regulation Of Phototransduction Cascade R-HSA-2514859	1/32	0.865629	0.998968	0.498326	0.0719078	RNF7
Nuclear Signaling By ERBB4 R-HSA-1251985	1/32	0.865629	0.998968	0.498326	0.0719078	NRG3
Signaling By NOTCH2 R-HSA-1980145	1/32	0.865629	0.998968	0.498326	0.0719078	JAG1
Termination Of Translesion DNA Synthesis R-HSA-5656169	1/32	0.865629	0.998968	0.498326	0.0719078	POLK
Thrombin Signaling Thru Proteinase Activated Receptors (PARs) R-HSA-456926	1/32	0.865629	0.998968	0.498326	0.0719078	GNA12
Clathrin-mediated Endocytosis R-HSA-8856828	6/142	0.868585	0.998968	0.680521	0.0958785	COPS4;COPS5;REPS2;APOB;SYT9;STAM2
Assembly Of Collagen Fibrils And Other Multimeric Structures R-HSA-2022090	2/57	0.868726	0.998968	0.561493	0.0790172	COL24A1;CTSV
SUMOylation Of Chromatin Organization Proteins R-HSA-4551638	2/57	0.868726	0.998968	0.561493	0.0790172	CBX2;NUP58
TRAF6 Mediated Induction Of NFkB And MAP Kinases Upon TLR7/8 Or 9 Activation R-HSA-975138	4/101	0.869221	0.998968	0.636366	0.0891917	USP14;RPS6KA5;IRAK2;MAPK14
Diseases Of Carbohydrate Metabolism R-HSA-5663084	1/33	0.873805	0.998968	0.482728	0.0651189	PMEL
FGFR2 Mutant Receptor Activation R-HSA-1839126	1/33	0.873805	0.998968	0.482728	0.0651189	FGFR2
Glucagon-type Ligand Receptors R-HSA-420092	1/33	0.873805	0.998968	0.482728	0.0651189	GCG
HIV Elongation Arrest And Recovery R-HSA-167287	1/33	0.873805	0.998968	0.482728	0.0651189	ELOC
Keratan Sulfate/Keratin Metabolism R-HSA-1638074	1/33	0.873805	0.998968	0.482728	0.0651189	ST3GAL1
Resolution Of D-loop Structures Thru Holliday Junction Intermediates R-HSA-5693568	1/33	0.873805	0.998968	0.482728	0.0651189	XRCC2
Sialic Acid Metabolism R-HSA-4085001	1/33	0.873805	0.998968	0.482728	0.0651189	ST3GAL1
Signaling To ERKs R-HSA-187687	1/33	0.873805	0.998968	0.482728	0.0651189	MAPK14
Telomere C-strand (Lagging Strand) Synthesis R-HSA-174417	1/33	0.873805	0.998968	0.482728	0.0651189	FEN1
Phototransduction Cascade R-HSA-2514856	1/33	0.873805	0.998968	0.482728	0.0651189	RNF7
MyD88 Dependent Cascade Initiated On Endosome R-HSA-975155	4/102	0.8741	0.998968	0.629839	0.0847511	USP14;RPS6KA5;IRAK2;MAPK14
Signaling By VEGF R-HSA-194138	4/102	0.8741	0.998968	0.629839	0.0847511	PKN2;PLCG1;MAPK14;RHOA
Late SARS-CoV-2 Infection Events R-HSA-9772573	2/58	0.875016	0.998968	0.551437	0.0736238	DAD1;ST3GAL1
Regulation Of HSF1-mediated Heat Shock Response R-HSA-3371453	3/81	0.876971	0.998968	0.593647	0.0779348	HSPH1;HIKESHI;NUP58
Toll Like Receptor 3 (TLR3) Cascade R-HSA-168164	4/103	0.878822	0.998968	0.623443	0.0805322	USP14;RPS6KA5;IRAK2;MAPK14
Toll Like Receptor 7/8 (TLR7/8) Cascade R-HSA-168181	4/103	0.878822	0.998968	0.623443	0.0805322	USP14;RPS6KA5;IRAK2;MAPK14
B-WICH Complex Positively Regulates rRNA Expression R-HSA-5250924	2/59	0.881027	0.998968	0.541734	0.0686196	H2BC4;H2AC19
RHOQ GTPase Cycle R-HSA-9013406	2/59	0.881027	0.998968	0.541734	0.0686196	VANGL1;PKN2
Transcriptional Regulation Of Granulopoiesis R-HSA-9616222	2/59	0.881027	0.998968	0.541734	0.0686196	H2BC4;H2AC19
Lysosome Vesicle Biogenesis R-HSA-432720	1/34	0.881484	0.998968	0.468074	0.0590469	AP1G1
Negative Regulation Of FGFR2 Signaling R-HSA-5654727	1/34	0.881484	0.998968	0.468074	0.0590469	FGFR2
Nuclear Import Of Rev Protein R-HSA-180746	1/34	0.881484	0.998968	0.468074	0.0590469	NUP58
Resolution Of D-Loop Structures R-HSA-5693537	1/34	0.881484	0.998968	0.468074	0.0590469	XRCC2
PI Metabolism R-HSA-1483255	3/82	0.882108	0.998968	0.586101	0.073521	MTMR14;GDE1;PLEKHA3
Platelet Degranulation R-HSA-114608	5/125	0.883127	0.998968	0.642734	0.0798829	OLA1;CD36;VCL;MANF;F5
HDACs Deacetylate Histones R-HSA-3214815	2/60	0.88677	0.998968	0.532365	0.0639741	H2BC4;H2AC19
Transcriptional Regulation By MECP2 R-HSA-8986944	2/60	0.88677	0.998968	0.532365	0.0639741	CAMK2A;OPRK1
rRNA Modification In Nucleus And Cytosol R-HSA-6790901	2/60	0.88677	0.998968	0.532365	0.0639741	UTP11;HEATR1
Beta Defensins R-HSA-1461957	1/35	0.888696	0.998968	0.454283	0.0536055	DEFB126
NEP/NS2 Interacts With Cellular Export Machinery R-HSA-168333	1/35	0.888696	0.998968	0.454283	0.0536055	NUP58
Negative Regulators Of DDX58/IFIH1 Signaling R-HSA-936440	1/35	0.888696	0.998968	0.454283	0.0536055	ATG5
Plasma Lipoprotein Clearance R-HSA-8964043	1/35	0.888696	0.998968	0.454283	0.0536055	APOB
SUMOylation Of SUMOylation Proteins R-HSA-4085377	1/35	0.888696	0.998968	0.454283	0.0536055	NUP58
Transport Of Ribonucleoproteins Into Host Nucleus R-HSA-168271	1/35	0.888696	0.998968	0.454283	0.0536055	NUP58
Transport Of SLBP Independent Mature mRNA R-HSA-159227	1/35	0.888696	0.998968	0.454283	0.0536055	NUP58
Vpr-mediated Nuclear Import Of PICs R-HSA-180910	1/35	0.888696	0.998968	0.454283	0.0536055	NUP58
Toll Like Receptor 9 (TLR9) Cascade R-HSA-168138	4/106	0.892075	0.998968	0.60501	0.0690955	USP14;RPS6KA5;IRAK2;MAPK14
G2/M Checkpoints R-HSA-69481	6/148	0.89214	0.998968	0.651557	0.0743636	ORC5;ORC4;PSMD12;PSMB5;PSMD14;H2BC4
Ca2+ Pathway R-HSA-4086398	2/61	0.892255	0.998968	0.523314	0.0596597	PPP3CB;CAMK2A
Cell-cell Junction Organization R-HSA-421270	2/61	0.892255	0.998968	0.523314	0.0596597	ANG;CDH19
DNA Damage/Telomere Stress Induced Senescence R-HSA-2559586	2/61	0.892255	0.998968	0.523314	0.0596597	H2BC4;H2AC19
Nuclear Events (Kinase And Transcription Factor Activation) R-HSA-198725	2/61	0.892255	0.998968	0.523314	0.0596597	RPS6KA5;MAPK14
Post NMDA Receptor Activation Events R-HSA-438064	2/61	0.892255	0.998968	0.523314	0.0596597	MPP2;CAMK2A
Signaling By FGFR In Disease R-HSA-1226099	2/61	0.892255	0.998968	0.523314	0.0596597	PLCG1;FGFR2
Aberrant Regulation Of Mitotic Cell Cycle Due To RB1 Defects R-HSA-9687139	1/36	0.895469	0.998968	0.44128	0.0487205	ANAPC10
Export Of Viral Ribonucleoproteins From Nucleus R-HSA-168274	1/36	0.895469	0.998968	0.44128	0.0487205	NUP58
Nuclear Pore Complex (NPC) Disassembly R-HSA-3301854	1/36	0.895469	0.998968	0.44128	0.0487205	NUP58
ROS And RNS Production In Phagocytes R-HSA-1222556	1/36	0.895469	0.998968	0.44128	0.0487205	ATP6V1G2
Regulation Of TP53 Degradation R-HSA-6804757	1/36	0.895469	0.998968	0.44128	0.0487205	RFFL
Signaling By FGFR1 In Disease R-HSA-5655302	1/36	0.895469	0.998968	0.44128	0.0487205	PLCG1
Transport Of SLBP Dependant Mature mRNA R-HSA-159230	1/36	0.895469	0.998968	0.44128	0.0487205	NUP58
DNA Double-Strand Break Repair R-HSA-5693532	6/149	0.895695	0.998968	0.646966	0.071267	TIPIN;FEN1;XRCC2;H2BC4;POLL;POLK
MyD88-independent TLR4 Cascade R-HSA-166166	4/107	0.896201	0.998968	0.599104	0.0656561	USP14;RPS6KA5;IRAK2;MAPK14
O-linked Glycosylation R-HSA-5173105	4/107	0.896201	0.998968	0.599104	0.0656561	GALNT5;A4GNT;ST3GAL1;GALNT9
Pre-NOTCH Transcription And Translation R-HSA-1912408	2/62	0.897492	0.998968	0.514564	0.0556509	H2BC4;H2AC19
Cell Junction Organization R-HSA-446728	3/86	0.900793	0.998968	0.557736	0.0582722	ANG;FERMT2;CDH19
Cooperation Of PDCL (PhLP1) And TRiC/CCT In G-protein Beta Folding R-HSA-6814122	1/37	0.901831	0.998968	0.429	0.0443277	CCT5
Formation Of Fibrin Clot (Clotting Cascade) R-HSA-140877	1/37	0.901831	0.998968	0.429	0.0443277	F5
Regulation Of TP53 Expression And Degradation R-HSA-6806003	1/37	0.901831	0.998968	0.429	0.0443277	RFFL
Response To Elevated Platelet Cytosolic Ca2+ R-HSA-76005	5/130	0.902307	0.998968	0.61686	0.0634136	OLA1;CD36;VCL;MANF;F5
G Alpha (Q) Signaling Events R-HSA-416476	9/212	0.902981	0.998968	0.683112	0.0697141	TRIO;PPAN-P2RY11;TRPC6;CHRM5;PROK2;TACR3;GCG;TRH;KALRN
Degradation Of Extracellular Matrix R-HSA-1474228	4/109	0.904039	0.998968	0.587629	0.0592815	MMP16;CAPN2;CTSV;PRSS2
Signaling By B Cell Receptor (BCR) R-HSA-983705	4/109	0.904039	0.998968	0.587629	0.0592815	PSMD12;PPP3CB;PSMB5;PSMD14
Apoptotic Cleavage Of Cellular Proteins R-HSA-111465	1/38	0.907806	0.998968	0.417383	0.0403713	TJP2
Diseases Of Mitotic Cell Cycle R-HSA-9675126	1/38	0.907806	0.998968	0.417383	0.0403713	ANAPC10
Resolution Of Abasic Sites (AP Sites) R-HSA-73933	1/38	0.907806	0.998968	0.417383	0.0403713	FEN1
SUMOylation Of Ubiquitinylation Proteins R-HSA-3232142	1/39	0.913417	0.998968	0.406377	0.0368026	NUP58
Signaling By FGFR3 R-HSA-5654741	1/39	0.913417	0.998968	0.406377	0.0368026	PLCG1
Translesion Synthesis By Y Family DNA Polymerases Bypasses Lesions On DNA Template R-HSA-110313	1/39	0.913417	0.998968	0.406377	0.0368026	POLK
Generic Transcription Pathway R-HSA-212436	62/1190	0.913919	0.998968	0.841725	0.0757668	KDM5B;COX7B;TP53RK;ZNF490;H2AC19;CCNC;RORB;CTSV;MED16;COX6A1;ING5;ZNF649;HEY2;ELOC;YAF2;VENTX;BNIP3L;RABGGTB;MED7;MSH2;FANCD2;ZNF556;KCTD15;PSMD12;PSMD14;MAX;CAMK2A;TWIST2;NEDD4L;TWIST1;ZNF3;COX5A;HDAC9;ANAPC10;HSPD1;PSMB5;MED31;ZNF626;NRBF2;RFFL;E2F6;ESRRA;JAG1;YES1;CRADD;CBX2;H2BC4;OPRK1;GTF2H2;FBXO32;COX6C;MAPK14;GTF2H5;POU4F2;CDK8;ZNF74;ERCC2;ZNF614;ZNF354A;CNOT9;DAND5;COX20
RUNX1 Regulates Genes Involved In Megakaryocyte Differentiation And Platelet Function R-HSA-8936459	2/66	0.916154	0.998968	0.482301	0.0422357	H2BC4;H2AC19
Collagen Formation R-HSA-1474290	3/90	0.916764	0.998968	0.531979	0.0462319	COL24A1;PLOD2;CTSV
Reproduction R-HSA-1474165	4/113	0.918159	0.998968	0.565944	0.048323	SYCP2;H2BC4;H2AC19;FKBP6
Collagen Degradation R-HSA-1442490	1/40	0.918687	0.998968	0.395936	0.0335792	PRSS2
Presynaptic Phase Of Homologous DNA Pairing And Strand Exchange R-HSA-5693616	1/40	0.918687	0.998968	0.395936	0.0335792	XRCC2
Signaling By FGFR4 R-HSA-5654743	1/40	0.918687	0.998968	0.395936	0.0335792	PLCG1
Collagen Biosynthesis And Modifying Enzymes R-HSA-1650814	2/67	0.920293	0.998968	0.474856	0.0394428	COL24A1;PLOD2
HDR Thru Homologous Recombination (HRR) R-HSA-5685942	2/67	0.920293	0.998968	0.474856	0.0394428	XRCC2;POLK
Activation Of HOX Genes During Differentiation R-HSA-5619507	3/91	0.920372	0.998968	0.525906	0.0436381	H2BC4;H2AC19;CNOT9
Apoptosis R-HSA-109581	7/178	0.920907	0.998968	0.630775	0.0519735	GSDMD;AVEN;PSMD12;PSMB5;PSMD14;PKN2;TJP2
HDR Thru Homologous Recombination (HRR) Or Single Strand Annealing (SSA) R-HSA-5693567	4/114	0.921385	0.998968	0.560769	0.0459141	TIPIN;XRCC2;H2BC4;POLK
Signaling By NTRK1 (TRKA) R-HSA-187037	4/114	0.921385	0.998968	0.560769	0.0459141	RPS6KA5;PLCG1;MAPK14;RHOA
Defective Homologous Recombination Repair (HRR) Due To BRCA2 Loss Of Function R-HSA-9701190	1/41	0.923637	0.998968	0.386017	0.0306638	XRCC2
Negative Regulation Of MAPK Pathway R-HSA-5675221	1/41	0.923637	0.998968	0.386017	0.0306638	PPP2R5E
Sensory Perception Of Sweet, Bitter, And Umami (Glutamate) Taste R-HSA-9717207	1/41	0.923637	0.998968	0.386017	0.0306638	TAS2R31
Telomere Maintenance R-HSA-157579	3/92	0.923837	0.998968	0.519969	0.0411916	FEN1;H2BC4;H2AC19
Activation Of GABAB Receptors R-HSA-991365	1/42	0.928285	0.998968	0.376582	0.0280238	GNAI1
Deactivation Of Beta-Catenin Transactivating Complex R-HSA-3769402	1/42	0.928285	0.998968	0.376582	0.0280238	SOX3
Intra-Golgi Traffic R-HSA-6811438	1/42	0.928285	0.998968	0.376582	0.0280238	COG8
Signaling By SCF-KIT R-HSA-1433557	1/42	0.928285	0.998968	0.376582	0.0280238	YES1
Transport Of Mature mRNA Derived From An Intronless Transcript R-HSA-159231	1/42	0.928285	0.998968	0.376582	0.0280238	NUP58
Vasopressin Regulates Renal Water Homeostasis Via Aquaporins R-HSA-432040	1/42	0.928285	0.998968	0.376582	0.0280238	RAB11A
Downstream TCR Signaling R-HSA-202424	3/94	0.930356	0.998968	0.508487	0.0367065	PSMD12;PSMB5;PSMD14
G2/M Transition R-HSA-69275	7/182	0.930753	0.998968	0.616225	0.044221	PSMD12;PSMB5;PSMD14;HAUS7;CEP250;CEP76;NINL
DAP12 Interactions R-HSA-2172127	1/43	0.932651	0.998968	0.367596	0.0256304	PLCG1
Homologous DNA Pairing And Strand Exchange R-HSA-5693579	1/43	0.932651	0.998968	0.367596	0.0256304	XRCC2
SUMOylation Of Transcription Cofactors R-HSA-3899300	1/43	0.932651	0.998968	0.367596	0.0256304	CBX2
Transport Of Mature mRNAs Derived From Intronless Transcripts R-HSA-159234	1/43	0.932651	0.998968	0.367596	0.0256304	NUP58
Transport Of Vitamins, Nucleosides, And Related Molecules R-HSA-425397	1/43	0.932651	0.998968	0.367596	0.0256304	SLC25A4
Voltage Gated Potassium Channels R-HSA-1296072	1/43	0.932651	0.998968	0.367596	0.0256304	KCNH5
Transcriptional Regulation By RUNX1 R-HSA-8878171	8/204	0.933376	0.998968	0.628612	0.0433413	PSMD12;PSMB5;PSMD14;CBX2;H2BC4;H2AC19;CTSV;YAF2
Drug ADME R-HSA-9748784	3/95	0.933419	0.998968	0.502933	0.0346524	ADAL;NUDT15;SLC38A3
Plasma Lipoprotein Assembly, Remodeling, And Clearance R-HSA-174824	2/71	0.935002	0.998968	0.447232	0.0300567	LPL;APOB
trans-Golgi Network Vesicle Budding R-HSA-199992	2/71	0.935002	0.998968	0.447232	0.0300567	AP1G1;SNX5
Mitotic G2-G2/M Phases R-HSA-453274	7/184	0.935261	0.998968	0.609197	0.0407734	PSMD12;PSMB5;PSMD14;HAUS7;CEP250;CEP76;NINL
Collagen Chain Trimerization R-HSA-8948216	1/44	0.936751	0.998968	0.359028	0.0234581	COL24A1
Interleukin-3, Interleukin-5 And GM-CSF Signaling R-HSA-512988	1/44	0.936751	0.998968	0.359028	0.0234581	YES1
PI3K Cascade R-HSA-109704	1/44	0.936751	0.998968	0.359028	0.0234581	FGFR2
Sphingolipid De Novo Biosynthesis R-HSA-1660661	1/44	0.936751	0.998968	0.359028	0.0234581	ORMDL3
TNF Signaling R-HSA-75893	1/44	0.936751	0.998968	0.359028	0.0234581	SMPD2
Signaling By FGFR2 R-HSA-5654738	2/72	0.938256	0.998968	0.44082	0.0280946	PLCG1;FGFR2
Cell-Cell Communication R-HSA-1500931	4/120	0.938452	0.998968	0.531593	0.0337688	KIRREL3;ANG;FERMT2;CDH19
Potential Therapeutics For SARS R-HSA-9679191	3/97	0.939176	0.998968	0.492179	0.0308852	FXYD2;ATP1A3;ATP1B3
Glycosphingolipid Metabolism R-HSA-1660662	1/45	0.940602	0.998968	0.35085	0.0214844	SMPD2
Regulation Of Complement Cascade R-HSA-977606	1/45	0.940602	0.998968	0.35085	0.0214844	C8A
TBC/RABGAPs R-HSA-8854214	1/45	0.940602	0.998968	0.35085	0.0214844	RAB11A
Cell Cycle R-HSA-1640170	31/654	0.942043	0.998968	0.763283	0.045571	RAB1A;FEN1;PSMD12;SYCP2;PSMD14;MAX;H2AC19;CDCA8;ANAPC10;CKS1B;ORC5;ORC4;PSMB5;SPAST;HAUS7;PPP2R5E;CEP250;CEP76;NINL;E2F6;TMPO;CENPT;RAB2A;CDKN2C;H2BC4;DHFR;DYNC1LI1;KIF2A;CENPP;FKBP6;NUP58
Activation Of NMDA Receptors And Postsynaptic Events R-HSA-442755	2/74	0.944305	0.998968	0.428529	0.0245575	MPP2;CAMK2A
Positive Epigenetic Regulation Of rRNA Expression R-HSA-5250913	2/74	0.944305	0.998968	0.428529	0.0245575	H2BC4;H2AC19
Transport Of Mature mRNA Derived From An Intron-Containing Transcript R-HSA-159236	2/74	0.944305	0.998968	0.428529	0.0245575	NXT1;NUP58
TNFR2 Non-Canonical NF-kB Pathway R-HSA-5668541	3/100	0.946953	0.998968	0.476881	0.0259928	PSMD12;PSMB5;PSMD14
IRS-mediated Signaling R-HSA-112399	1/47	0.947615	0.998968	0.33556	0.0180556	FGFR2
Sensory Perception Of Taste R-HSA-9717189	1/47	0.947615	0.998968	0.33556	0.0180556	TAS2R31
Viral Messenger RNA Synthesis R-HSA-168325	1/47	0.947615	0.998968	0.33556	0.0180556	NUP58
DNA Damage Bypass R-HSA-73893	1/48	0.950804	0.998968	0.328403	0.0165669	POLK
Signal Transduction R-HSA-162582	132/2465	0.951683	0.998968	0.859507	0.0425656	VPS29;TRIO;CHRM5;H2AC19;CCNC;WDR83;ARHGAP39;GOLGA3;SOX3;BAIAP2L2;GPR176;RPS6KA5;PROK2;TMPO;DYNC2H1;USP8;PDHX;ATP6V1G2;WNT5B;GPR37L1;GABRG2;DYNC1LI1;MYL6;IAPP;AGTR2;S100A9;STAM2;S100A8;ROPN1;VCL;GNAZ;PSMD12;CALCRL;PSMD14;CTBP2;PDE1C;CDCA8;NEDD4L;TWF1;VPS26A;RASAL2;KALRN;RASGRP4;RAP1B;SNX3;HCAR1;RDH10;MYO6;PENK;PLCG1;DRD2;GPR15;JAG1;YES1;PPAN-P2RY11;TAS2R31;CAV2;WNT3A;CBX2;ARHGAP29;SMAD9;VANGL1;COP…
Signaling By Insulin Receptor R-HSA-74752	2/77	0.95233	0.998968	0.411322	0.0200903	ATP6V1G2;FGFR2
RMTs Methylate Histone Arginines R-HSA-3214858	1/49	0.9538	0.998968	0.321544	0.0152094	H2AC19
Signaling By FGFR1 R-HSA-5654736	1/49	0.9538	0.998968	0.321544	0.0152094	PLCG1
TP53 Regulates Transcription Of Cell Cycle Genes R-HSA-6791312	1/49	0.9538	0.998968	0.321544	0.0152094	CNOT9
Constitutive Signaling By Aberrant PI3K In Cancer R-HSA-2219530	2/78	0.954751	0.998968	0.405888	0.0187946	NRG3;FGFR2
Pre-NOTCH Expression And Processing R-HSA-1912422	2/78	0.954751	0.998968	0.405888	0.0187946	H2BC4;H2AC19
Aquaporin-mediated Transport R-HSA-445717	1/50	0.956614	0.998968	0.314965	0.0139705	RAB11A
Extension Of Telomeres R-HSA-180786	1/50	0.956614	0.998968	0.314965	0.0139705	FEN1
Neurotransmitter Release Cycle R-HSA-112310	1/50	0.956614	0.998968	0.314965	0.0139705	SYN2
Processing Of DNA Double-Strand Break Ends R-HSA-5693607	2/80	0.959244	0.998968	0.395438	0.0164542	TIPIN;H2BC4
IRS-related Events Triggered By IGF1R R-HSA-2428928	1/51	0.959256	0.998968	0.308649	0.0128391	FGFR2
PI5P, PP2A And IER3 Regulate PI3K/AKT Signaling R-HSA-6811558	3/106	0.959807	0.998968	0.448957	0.0184178	NRG3;PPP2R5E;FGFR2
Sensory Perception R-HSA-9709957	28/616	0.960107	0.998968	0.730012	0.0297191	OR2C3;OR4E2;CTBP2;OR51D1;OR1I1;TWF1;LPL;RNF7;OR2T11;OR10W1;RDH10;CHRNA10;EPS8L2;APOB;STRA6;OR5H6;OR1D2;TAS2R31;OR1J4;ABCA4;OR10Z1;CACNB2;OR10X1;OR4K13;CAPZA2;NAPEPLD;OR6C4;OR4C6
SARS-CoV-2 Infection R-HSA-9694516	11/283	0.96076	0.998968	0.621833	0.0248924	TOMM70;SEC23A;IRAK2;DAD1;SNRPG;GEMIN7;HLA-G;ST3GAL1;RPS13;NUP58;TUFM
DDX58/IFIH1-mediated Induction Of Interferon-Alpha/Beta R-HSA-168928	2/81	0.961327	0.998968	0.390412	0.0153983	TOMM70;ATG5
Interleukin-4 And Interleukin-13 Signaling R-HSA-6785807	3/107	0.961641	0.998968	0.444616	0.0173906	TWIST1;CD36;HSP90B1
IGF1R Signaling Cascade R-HSA-2428924	1/52	0.961737	0.998968	0.302581	0.0118049	FGFR2
SARS-CoV-1 Infection R-HSA-9678108	1/52	0.961737	0.998968	0.302581	0.0118049	ST3GAL1
Signaling By PDGF R-HSA-186797	1/52	0.961737	0.998968	0.302581	0.0118049	PLCG1
Signaling By NTRKs R-HSA-166520	4/132	0.962881	0.998968	0.481446	0.0182107	RPS6KA5;PLCG1;MAPK14;RHOA
Intracellular Signaling By Second Messengers R-HSA-9006925	12/306	0.963504	0.998968	0.627377	0.023325	USP13;PSMD12;PSMB5;PDE1C;PSMD14;NRG3;PPP2R5E;CBX2;CAMK2A;PLCG1;FGFR2;OTUD3
Heparan Sulfate/Heparin (HS-GAG) Metabolism R-HSA-1638091	1/53	0.964068	0.998968	0.296746	0.0108591	HS6ST3
Insulin Receptor Signaling Cascade R-HSA-74751	1/53	0.964068	0.998968	0.296746	0.0108591	FGFR2
Signaling By Type 1 Insulin-like Growth Factor 1 Receptor (IGF1R) R-HSA-2404192	1/53	0.964068	0.998968	0.296746	0.0108591	FGFR2
Transport Of Mature Transcript To Cytoplasm R-HSA-72202	2/83	0.96519	0.998968	0.380731	0.0134895	NXT1;NUP58
Regulation Of TP53 Activity R-HSA-5633007	5/157	0.965337	0.998968	0.506552	0.01787	ING5;TP53RK;RFFL;MAPK14;POU4F2
Innate Immune System R-HSA-168249	50/1035	0.966436	0.998968	0.775582	0.0264781	FAF2;CTSV;C8A;HEBP2;PPP3CB;RPS6KA5;CD36;PRSS2;PGM1;TOMM70;CHRNB4;ATP6V1G2;S100A1;ATAD3B;RHOA;DYNC1LI1;S100A9;S100A8;VCL;LILRA6;USP14;PSMD12;COLEC10;PSMD14;DEFB126;MOSPD2;RASGRP4;HSP90B1;RAP1B;PSMB5;IRAK2;ORMDL3;CXCR2;PLCG1;APOB;ATG5;GSDMD;MGAM;YES1;CARD9;GGH;PDAP1;MAPK14;RAB10;CAPZA2;RAB18;PKN2;POLR3H;SUGT1;NIT2
Signaling By Interleukins R-HSA-449147	19/453	0.969211	0.998968	0.671726	0.0210065	GSDMD;USP14;PSMD12;YES1;PSMD14;IL31RA;TWIST1;MAPK14;HSP90B1;RAP1B;PSMB5;IL36A;RPS6KA5;IRAK2;PKN2;CD36;BRWD1;S100A9;CRLF2
Signaling By FGFR R-HSA-190236	2/86	0.970297	0.998968	0.367075	0.0110685	PLCG1;FGFR2
Negative Regulation Of PI3K/AKT Network R-HSA-199418	3/113	0.971097	0.998968	0.42023	0.0123251	NRG3;PPP2R5E;FGFR2
Fcgamma Receptor (FCGR) Dependent Phagocytosis R-HSA-2029480	2/87	0.971833	0.998968	0.362737	0.010364	YES1;PLCG1
Regulated Necrosis R-HSA-5218859	1/57	0.972054	0.998968	0.275491	0.00780837	GSDMD
Programmed Cell Death R-HSA-5357801	7/208	0.972274	0.998968	0.535765	0.0150644	GSDMD;AVEN;PSMD12;PSMB5;PSMD14;PKN2;TJP2
Interferon Gamma Signaling R-HSA-877300	2/89	0.974677	0.998968	0.35436	0.00908888	CAMK2A;HLA-G
Sphingolipid Metabolism R-HSA-428157	2/89	0.974677	0.998968	0.35436	0.00908888	SMPD2;ORMDL3
ESR-mediated Signaling R-HSA-8939211	6/188	0.97481	0.998968	0.507267	0.0129419	CAV2;H2BC4;H2AC19;S1PR3;DAND5;GNAI1
Regulation Of TP53 Activity Thru Phosphorylation R-HSA-6804756	2/90	0.975994	0.998968	0.350315	0.00851237	TP53RK;MAPK14
FCGR3A-mediated Phagocytosis R-HSA-9664422	1/60	0.976857	0.998968	0.261441	0.00612163	YES1
Recruitment And ATM-mediated Phosphorylation Of Repair And Signal Proteins At DNA Double Strand Breaks R-HSA-5693565	1/60	0.976857	0.998968	0.261441	0.00612163	H2BC4
Diseases Of Glycosylation R-HSA-3781865	4/143	0.977041	0.998968	0.443085	0.0102915	DPM1;PMM2;RFT1;PGM1
SUMO E3 Ligases SUMOylate Target Proteins R-HSA-3108232	5/168	0.977907	0.998968	0.472088	0.0105468	CBX2;NSMCE2;SP3;CDCA8;NUP58
DNA Double Strand Break Response R-HSA-5693606	1/61	0.978267	0.998968	0.25707	0.00564849	H2BC4
Regulation Of PTEN Gene Transcription R-HSA-8943724	1/61	0.978267	0.998968	0.25707	0.00564849	CBX2
Estrogen-dependent Gene Expression R-HSA-9018519	3/119	0.978315	0.998968	0.398365	0.00873373	H2BC4;H2AC19;DAND5
Glycosaminoglycan Metabolism R-HSA-1630316	3/120	0.979337	0.998968	0.394939	0.00824621	CHORDC1;ST3GAL1;HS6ST3
Cytosolic Sensors Of Pathogen-Associated DNA R-HSA-1834949	1/63	0.980835	0.998968	0.248751	0.00481364	POLR3H
SARS-CoV Infections R-HSA-9679506	14/369	0.980897	0.998968	0.605176	0.0116728	TOMM70;SEC23A;ATP1A3;ATP1B3;HLA-G;TUFM;IRAK2;DAD1;FXYD2;SNRPG;GEMIN7;ST3GAL1;RPS13;NUP58
SUMOylation R-HSA-2990846	5/174	0.982821	0.998968	0.455181	0.00788734	CBX2;NSMCE2;SP3;CDCA8;NUP58
FOXO-mediated Transcription R-HSA-9614085	1/65	0.983099	0.998968	0.240952	0.00410706	FBXO32
Integrin Cell Surface Interactions R-HSA-216083	1/66	0.984129	0.998968	0.237232	0.00379525	ITGA10
PIP3 Activates AKT Signaling R-HSA-1257604	9/268	0.98423	0.998968	0.533798	0.00848492	USP13;PSMD12;PSMB5;PSMD14;NRG3;PPP2R5E;CBX2;FGFR2;OTUD3
Interferon Signaling R-HSA-913531	6/200	0.98434	0.998968	0.475583	0.00750647	EIF4E3;CAMK2A;KPNA4;PLCG1;HLA-G;NUP58
RNA Polymerase II Transcription Termination R-HSA-73856	1/67	0.985096	0.998968	0.233625	0.00350806	SNRPG
Glycolysis R-HSA-70171	1/69	0.986858	0.998968	0.22673	0.00299951	NUP58
Interferon Alpha/Beta Signaling R-HSA-909733	1/72	0.989117	0.998968	0.217115	0.00237575	HLA-G
PI3K/AKT Signaling In Cancer R-HSA-2219528	2/105	0.98933	0.998968	0.299058	0.00320799	NRG3;FGFR2
Signaling By Nuclear Receptors R-HSA-9006931	8/260	0.990771	0.998968	0.487448	0.00451955	PDHX;CAV2;RDH10;H2BC4;H2AC19;S1PR3;DAND5;GNAI1
Expression And Translocation Of Olfactory Receptors R-HSA-9752946	14/393	0.990919	0.998968	0.566116	0.00516456	OR2C3;OR4E2;OR1D2;OR1J4;OR51D1;OR1I1;OR2T11;OR10Z1;OR10X1;OR10W1;OR4K13;OR6C4;OR4C6;OR5H6
Chromatin Modifying Enzymes R-HSA-3247509	7/238	0.991225	0.998968	0.465432	0.00410211	ING5;TAF6L;KDM5B;H2BC4;H2AC19;DMAP1;BRWD1
Metabolism Of Carbohydrates R-HSA-71387	9/285	0.991479	0.998968	0.50046	0.00428284	FUT6;FUT10;CHORDC1;LALBA;TKT;ST3GAL1;PGM1;NUP58;HS6ST3
G2/M DNA Damage Checkpoint R-HSA-69473	1/77	0.992054	0.998968	0.202777	0.00161774	H2BC4
Olfactory Signaling Pathway R-HSA-381753	14/401	0.992982	0.998968	0.554172	0.00390315	OR2C3;OR4E2;OR1D2;OR1J4;OR51D1;OR1I1;OR2T11;OR10Z1;OR10X1;OR10W1;OR4K13;OR6C4;OR4C6;OR5H6
Extracellular Matrix Organization R-HSA-1474244	9/291	0.993184	0.998968	0.489653	0.00334903	FBN2;COL24A1;MMP16;ITGA10;CAPN2;PLOD2;FBLN1;CTSV;PRSS2
Diseases Of Metabolism R-HSA-5668914	7/247	0.993889	0.998968	0.447761	0.00274454	DPM1;SLC34A2;PMEL;PMM2;RFT1;MMUT;PGM1
mRNA Splicing - Major Pathway R-HSA-72163	4/181	0.996041	0.998968	0.34725	0.0013774	GCFC2;SNRPG;HNRNPH2;TXNL4A
Immunoregulatory Interactions Between A Lymphoid And A non-Lymphoid Cell R-HSA-198933	2/123	0.996052	0.998968	0.254325	0.00100618	LILRA6;HLA-G
Glucose Metabolism R-HSA-70326	1/89	0.996265	0.998968	0.175013	0.000654915	NUP58
Peptide Hormone Metabolism R-HSA-2980736	1/89	0.996265	0.998968	0.175013	0.000654915	GCG
Cytokine Signaling In Immune System R-HSA-1280215	27/702	0.997028	0.998968	0.609764	0.00181462	USP14;PSMD12;EIF4E3;PSMD14;CAMK2A;TWIST1;RNF7;HSP90B1;RAP1B;PSMB5;IL36A;RPS6KA5;IRAK2;KPNA4;PLCG1;ELOC;CD36;GSDMD;YES1;IL31RA;MAPK14;HLA-G;PKN2;BRWD1;S100A9;NUP58;CRLF2
mRNA Splicing R-HSA-72172	4/189	0.997308	0.998968	0.332091	0.000895057	GCFC2;SNRPG;HNRNPH2;TXNL4A
Processing Of Capped Intron-Containing Pre-mRNA R-HSA-72203	6/242	0.997338	0.998968	0.390062	0.00103962	GCFC2;NXT1;SNRPG;HNRNPH2;TXNL4A;NUP58
Signaling By Receptor Tyrosine Kinases R-HSA-9006934	16/496	0.998732	0.999547	0.508896	0.000645817	GABRB3;GABRB2;USP8;ATP6V1G2;YES1;RANBP9;MAPK14;GABRG2;RHOA;RAP1B;RPS6KA5;NRG3;PKN2;PLCG1;STAM2;FGFR2
Immune System R-HSA-168256	86/1943	0.999634	0.999634	0.694382	0.000254511	EIF4E3;UBE3C;FAF2;CTSV;C8A;NPEPPS;HEBP2;PPP3CB;IL36A;RPS6KA5;AP1G1;PPP2R5E;SEC61G;KPNA4;CD36;ELOC;SEC61B;PRSS2;PGM1;TOMM70;CHRNB4;ATP6V1G2;S100A1;ATAD3B;HLA-G;RHOA;DYNC1LI1;KIF2A;GAN;SEC22B;S100A9;RAPGEF3;S100A8;TRIM11;VCL;NUP58;PRKN;LILRA6;ANAPC13;USP14;SEC23A;PSMD12;COLEC10;PSMD14;UBA5;DEFB126;CAMK2A;MOSPD2;NEDD4L;TWIST1;RNF7;UBE2J2;RASGRP4;ANAPC10;HSP90B1;RAP1B;SEC14L2;PSMB5;IRAK2;ORMDL3;CXCR2…

## Sheet: WikiPathway
Term	Overlap	P-value	Adjusted p-value	Odds Ratio	Combined Score	Genes
Electron Transport Chain OXPHOS System In Mitochondria WP111	21/105	1.13468e-06	0.000641093	3.91562	53.6016	NDUFA8;COX7B;NDUFB8;ATP5PD;NDUFB6;NDUFB5;NDUFB1;COX7A2;UQCR11;COX6A1;COX6C;COX5A;UQCRH;UQCRQ;UQCRFS1;NDUFS1;NDUFV3;NDUFV2;ATP5MG;SLC25A4;ATP5MF
Mitochondrial Complex IV Assembly WP4922	9/34	0.000143794	0.0406218	5.6	49.5439	COA3;COX7B;CMC1;COX7A2;COX6A1;COX6C;COX5A;SMIM20;COX20
Mitochondrial Complex I Assembly Model OXPHOS System WP4324	11/56	0.000471808	0.0791055	3.80472	29.1402	NDUFA8;NDUFB8;NDUFB6;NDUFB5;NDUFAF4;NDUFAF2;NDUFB1;NDUFS1;TMEM126B;NDUFV3;NDUFV2
Mitochondrial Fission And Fusion WP4318	5/13	0.000700049	0.0791055	9.69886	70.456	FIS1;MTFP1;BNIP3;MFN1;MFN2
Krebs Cycle Disorders WP4236	5/13	0.000700049	0.0791055	9.69886	70.456	LDHC;PDHX;LDHA;SUCLA2;SUCLG1
Oxidative Phosphorylation WP623	11/60	0.000869403	0.0818688	3.49339	24.6204	NDUFA8;NDUFB8;ATP5PD;NDUFB6;NDUFB5;NDUFB1;NDUFS1;NDUFV3;NDUFV2;ATP5MG;ATP5MF
Mitochondrial Complex III Assembly WP4921	5/16	0.00203881	0.164561	7.05259	43.6935	UQCC2;UQCRQ;UQCRFS1;UQCR11;UQCRH
Fatty Acid Transporters WP5061	5/18	0.00361292	0.255162	5.96694	33.5535	FABP4;FABP5;ACSL1;ACSL4;CD36
Nonalcoholic Fatty Liver Disease WP4396	18/154	0.00580177	0.339666	2.06203	10.6186	NDUFA8;COX7B;NDUFB8;NDUFB6;NDUFB5;NDUFB1;COX7A2;UQCR11;COX6A1;COX6C;EIF2S1;COX5A;UQCRH;UQCRQ;UQCRFS1;NDUFS1;NDUFV3;NDUFV2
Ciliary Landscape WP4352	23/215	0.00601179	0.339666	1.86853	9.55572	RAB2A;BBS1;ZYG11B;IFT70A;PSMD12;CTBP2;CAMK2A;RANBP9;MYL6B;COX6C;SPATA7;COPS4;DYNC1LI1;MYL6;EXOSC4;COPS5;MSH2;IFT81;TIPRL;ANKS6;EFHC2;NINL;CNOT9
mBDNF And proBDNF Regulation Of GABA Neurotransmission WP4829	7/38	0.00721159	0.370413	3.50561	17.2899	GABRB3;GABRB2;SLC12A5;GABRA4;PLCG1;RHOA;GABRG2
Omega 3 Omega 6 Fatty Acid Synthesis WP4723	4/15	0.010781	0.507607	5.63741	25.5373	ACSL1;ACOX1;PLA2G4A;ACSL4
SARS CoV 2 Nsp1 Inhibits Translation Initiation In Host Cell WP5027	4/16	0.0136951	0.570167	5.16735	22.1717	EIF3J;EIF2S2;EIF2S1;EIF3A
DNA Repair Pathways Full Network WP4946	14/120	0.014128	0.570167	2.05415	8.74986	FEN1;GTF2H2C;LIG3;GTF2H2;FANCE;RAD23B;GTF2H5;RAD54B;MSH2;FANCD2;ERCC2;POLL;POLK;FAN1
Arsenic Metabolism And Reactive Oxygen Species Generation WP5233	3/10	0.019443	0.732352	6.64003	26.1635	COA3;UQCRFS1;VDAC1
Smith Magenis And Potocki Lupski Syndrome Copy Number Variation WP5381	16/156	0.027953	0.987092	1.7772	6.35744	PRKN;USP8;ARG2;RANBP9;C9ORF72;RHOA;COPS4;RAB10;FLCN;LDHA;COPS5;IFT81;ATG101;CFL2;RB1CC1;BMAL1
15Q13 3 Copy Number Variation Syndrome WP4942	4/20	0.0300729	0.999483	3.87469	13.5774	FANCD2;CHRNA7;CHRFAM7A;FAN1
Sebaleic Acid Formation And Metabolism WP5315	2/5	0.0326033	0.999512	10.3226	35.3378	ACSL1;CYP4F3
Nucleotide Excision Repair In Xeroderma Pigmentosum WP5114	9/75	0.0374947	0.999512	2.11658	6.9499	GTF2H2C;H4C9;ERCC2;LIG3;POLK;GTF2H2;H4C3;RAD23B;GTF2H5
Metabolic Pathways Of Fibroblasts WP5312	5/32	0.0421396	0.999512	2.87083	9.09125	LDHA;CD36;PLCG1;PGM1;RHOA
Neurodegeneration W Brain Fe Accumulation NBIA Subtypes Pathway WP4577	6/44	0.0486913	0.999512	2.44835	7.39953	ATG3;DCAF17;ATG101;RB1CC1;ATP13A2;ATG5
Fatty Acid Beta Oxidation WP143	5/34	0.0527646	0.999512	2.67256	7.86243	ACSL1;LPL;ACSL4;ACAT1;DECR1
Physiological And Pathological Hypertrophy Of The Heart WP1528	4/24	0.0545132	0.999512	3.09909	9.01623	PPP3CB;MYEF2;MAPK14;RHOA
Leucine Isoleucine And Valine Metabolism WP4686	4/24	0.0545132	0.999512	3.09909	9.01623	HIBADH;MLYCD;MMUT;ACAT1
GPCRs Class B Secretin Like WP334	4/24	0.0545132	0.999512	3.09909	9.01623	ADGRE2;CALCRL;ADGRL1;ADGRL2
Angiogenesis WP1539	4/24	0.0545132	0.999512	3.09909	9.01623	PLCG1;MAPK14;FGF2;FGFR2
Hypothetical Craniofacial Development Pathway WP3655	2/7	0.0631401	0.999512	6.19291	17.1073	ARHGAP29;RHOA
MicroRNAs In Cardiomyocyte Hypertrophy WP1544	9/83	0.0643032	0.999512	1.88695	5.17807	PPP3CB;MYEF2;WNT3A;MAPK14;FGF2;HDAC9;MYLK3;RHOA;FGFR2
Parkinson 39 S Disease Pathway WP2371	5/38	0.0782584	0.999512	2.34811	5.98237	PRKN;GPR37;LRRK2;UBE2J2;MAPK14
Intestinal Microbiome On Anticoag Response Of Vit K Antagonists WP5273	2/8	0.080873	0.999512	5.16048	12.978	NPC1L1;CD36
Hijack Of Ubiquitination By SARS CoV 2 WP4860	2/8	0.080873	0.999512	5.16048	12.978	ZYG11B;ELOC
TCA Cycle Aka Krebs Or Citric Acid Cycle WP78	3/18	0.0923355	0.999512	3.09736	7.37892	SUCLA2;OGDH;SUCLG1
HIF1A And PPARG In Cardiac Hypertropthy WP2456	2/9	0.0999096	0.999512	4.42304	10.1884	LDHA;CD36
Thiamine Metabolic Pathways WP4297	2/9	0.0999096	0.999512	4.42304	10.1884	OGDH;TKT
Host Pathogen Interaction Of Human CoVs Autophagy WP4863	3/19	0.104916	0.999512	2.90362	6.54649	ATG3;RB1CC1;ATG5
Mitochondrial Gene Expression WP391	3/19	0.104916	0.999512	2.90362	6.54649	ESRRA;MYEF2;MTERF3
Autophagy WP4923	4/30	0.106054	0.999512	2.38315	5.34733	ATG3;ATG101;RB1CC1;ATG5
Corticotropin Releasing Hormone Signaling WP2355	9/92	0.106134	0.999512	1.68153	3.77176	RAP1B;GNAZ;CAMK2A;PLCG1;MAPK14;RHOA;RAPGEF3;GNAI1;CACNA1H
Eukaryotic Transcription Initiation WP405	5/42	0.109238	0.999512	2.09381	4.63618	GTF2H2C;ERCC2;POLR3H;GTF2H2;GTF2E2
Clock Controlled Autophagy In Bone Metabolism WP5205	8/80	0.112066	0.999512	1.72264	3.77028	ATG3;ATG101;RB1CC1;SMAD9;RORB;BMAL1;NPAS2;ATG5
GABA Receptor Signaling WP4159	4/31	0.116232	0.999512	2.29477	4.93873	GABRB3;GABRB2;GABRA4;GABRG2
PPAR Signaling WP3942	7/68	0.117827	0.999512	1.77869	3.80379	FABP4;FABP5;ACSL1;ACOX1;LPL;ACSL4;CD36
Ca Mediated T Cell Apoptosis Inclusion Body Myositis WP5142	3/20	0.118123	0.999512	2.73267	5.83706	PPP3CB;CAPN2;PLCG1
Lipid Metabolism In Senescent Cells WP5149	3/20	0.118123	0.999512	2.73267	5.83706	PLA2G12A;PLA2G4A;PLA2G3
Lipid Particles Composition WP3601	2/10	0.120026	0.999512	3.86995	8.20447	LPL;APOB
5Q35 Copy Number Variation WP5380	10/109	0.125955	0.999512	1.56637	3.24525	COX7B;MAX;FAF2;ABHD5;PLCG1;COX6A1;DRD2;COX6C;COX5A;GNAI1
Nucleotide Excision Repair WP4753	5/44	0.12665	0.999512	1.98623	4.10419	GTF2H2C;ERCC2;GTF2H2;RAD23B;GTF2H5
N Glycan Biosynthesis WP5153	6/57	0.130837	0.999512	1.82299	3.70761	DPM1;DAD1;RFT1;PMM2;ALG10;ALG10B
Nicotine Effect On Dopaminergic Neurons WP1602	3/21	0.131908	0.999512	2.58072	5.22763	KCNK9;DRD2;GNAI1
Fluoropyrimidine Activity WP1601	4/33	0.137787	0.999512	2.13628	4.2342	DHFR;PPAT;ERCC2;GGH
Oxidative Stress Response WP408	4/33	0.137787	0.999512	2.13628	4.2342	GPX1;MT1X;NOX5;MAPK14
Glyoxylate Metabolism WP5166	2/11	0.141022	0.999512	3.43977	6.73797	LDHA;PXMP2
Fatty Acid Biosynthesis WP357	3/22	0.14622	0.999512	2.44476	4.70041	ACSL1;ACSL4;DECR1
Cholesterol Metabolism WP5304	7/72	0.14643	0.999512	1.66887	3.20625	NPC1L1;TSPO;LPL;VDAC1;CD36;APOB;TM7SF2
Senescence Associated Secretory Phenotype SASP WP3391	10/113	0.148849	0.999512	1.50522	2.86717	H3C8;H2AC8;H4C9;CDKN2C;H2BC4;H2AC19;H4C3;ANAPC10;H2AC18;VENTX
Fatty Acids And Lipoproteins Transport In Hepatocytes WP5323	4/35	0.160803	0.999512	1.99824	3.65194	FABP4;ACSL1;VDAC1;APOB
P38 MAPK Signaling WP400	4/35	0.160803	0.999512	1.99824	3.65194	RPS6KA5;MAX;PLA2G4A;MAPK14
Nanoparticle Triggered Autophagic Cell Death WP2509	3/23	0.161008	0.999512	2.3224	4.24141	SH3GLB1;ATG3;ATG5
SRF And miRs In Smooth Muscle Differentiation And Proliferation WP1991	2/12	0.162715	0.999512	3.09563	5.6209	BORCS8-MEF2B;MEF2B
Energy Metabolism WP1541	5/48	0.164921	0.999512	1.80108	3.24606	ESRRA;BORCS8-MEF2B;PPP3CB;MEF2B;MAPK14
Enterocyte Cholesterol Metabolism WP5333	4/36	0.172803	0.999512	1.93569	3.39831	NPC1L1;CD36;APOB;TM7SF2
Hippocampal Synaptogenesis And Neurogenesis WP5231	3/24	0.176221	0.999512	2.21169	3.83953	RPS6KA5;CAMK2A;MAPK14
IL1 And Megakaryocytes In Obesity WP2865	3/24	0.176221	0.999512	2.21169	3.83953	F2;S100A9;CCR3
MFAP5 Mediated Ovarian Cancer Cell Motility And Invasiveness WP3301	2/13	0.184945	0.999512	2.81406	4.74928	TNNC1;PLCG1
Leukotriene Metabolic Pathway WP5171	2/13	0.184945	0.999512	2.81406	4.74928	CYP4F3;DECR1
Photodynamic Therapy Induced HIF 1 Survival Signaling WP3614	4/37	0.185099	0.999512	1.87694	3.16614	EGLN1;BNIP3L;LDHA;BNIP3
Serotonin HTR1 Group And FOS Pathway WP722	4/37	0.185099	0.999512	1.87694	3.16614	RPS6KA5;MAPK14;GNAI1;RHOA
Translation Factors WP107	5/50	0.185587	0.999512	1.72084	2.8983	EIF3J;EIF2S2;EIF2S1;EIF3A;PAIP1
Amino Acid Metabolism WP3925	8/91	0.187724	0.999512	1.49346	2.49823	PDHX;ARG2;LDHA;HIBADH;OGDH;SUCLG1;MMUT;ASS1
Hypothesized Pathways In Pathogenesis Of Cardiovascular Disease WP3668	3/25	0.191811	0.999512	2.11105	3.48586	FBN2;POSTN;MAPK14
S1P Receptor Signal Transduction WP26	3/25	0.191811	0.999512	2.11105	3.48586	SMPD2;S1PR3;GNAI1
Amyotrophic Lateral Sclerosis ALS WP2447	4/38	0.197668	0.999512	1.82164	2.95317	PPP3CB;GPX1;DERL1;MAPK14
Female Steroid Hormones In Cardiomyocyte Energy Metabolism WP5318	2/14	0.207566	0.999512	2.57942	4.05564	ESRRA;APOB
H19 Rb E2F1 And CDK Beta Catenin In Colorectal Cancer WP3969	2/14	0.207566	0.999512	2.57942	4.05564	CDK8;JAG1
Omega 9 Fatty Acid Synthesis WP4724	2/14	0.207566	0.999512	2.57942	4.05564	ACSL1;ACSL4
Neural Crest Cell Migration During Development WP4564	4/40	0.223532	0.999512	1.72025	2.57728	TRIO;TWIST1;EPHB1;RHOA
Intraflagellar Transport Proteins Binding To Dynein WP4532	3/27	0.223925	0.999512	1.93492	2.8955	DYNC2H1;DYNC1LI1;IFT81
Biosynth Of Tetrahydrobiopterin And Phenylalanine Catabolism WP4156	2/15	0.230448	0.999512	2.38087	3.49448	DHFR;MAOB
Glycine Metabolism Including IMDs WP5028	2/15	0.230448	0.999512	2.38087	3.49448	GCSH;GLRX5
Rubinstein Taybi Syndrome 1 WP5367	2/15	0.230448	0.999512	2.38087	3.49448	BMAL1;NPAS2
Common Pathways Underlying Drug Addiction WP2636	4/41	0.236779	0.999512	1.67367	2.41113	RAP1B;CAMK2A;DRD2;GNAI1
ADHD And Autism ASD Pathways WP5420	26/370	0.247807	0.999512	1.17224	1.6354	GABRB3;CNTNAP3;GABRB2;MAOB;GRM3;MTHFD1L;ATG101;RB1CC1;MMUT;PLCG1;PCBD2;SCN3B;DRD2;ATG5;ATG3;CBR1;NLGN4X;GABRA4;GABRG2;RHOA;DHFR;GKAP1;DLG5;KYAT3;NOX5;ALPI
TCA Cycle And Deficiency Of Pyruvate Dehydrogenase Complex PDHc WP2453	2/16	0.253476	0.999512	2.21069	3.03415	OGDH;ACO1
2Q21 1 Copy Number Variation Syndrome WP5223	2/16	0.253476	0.999512	2.21069	3.03415	ARHGEF4;RHOA
8Q11 23 RB1CC1 Copy Number Variation WP5412	2/16	0.253476	0.999512	2.21069	3.03415	ATG101;RB1CC1
Familial Hyperlipidemia Type 2 WP5109	2/16	0.253476	0.999512	2.21069	3.03415	LPL;APOB
Neural Crest Cell Migration In Cancer WP4565	4/43	0.263785	0.999512	1.58767	2.11576	TRIO;TWIST1;EPHB1;RHOA
Vitamin A And Carotenoid Metabolism WP716	4/43	0.263785	0.999512	1.58767	2.11576	NPC1L1;RDH10;LPL;CD36
Estradiol Regulation In Porto Sinusoidal Vascular Disease WP5235	1/5	0.269042	0.999512	3.86759	5.0777	SP3
GLP 1 Secretion From Intestine To Portal Vein WP5446	1/5	0.269042	0.999512	3.86759	5.0777	GCG
Disorders In Ketone Body Synthesis WP5175	1/5	0.269042	0.999512	3.86759	5.0777	ACAT1
Disorders In Ketolysis WP5195	1/5	0.269042	0.999512	3.86759	5.0777	ACAT1
Creatine Pathway WP5190	1/5	0.269042	0.999512	3.86759	5.0777	SLC6A8
Neural Crest Differentiation WP2064	8/101	0.270658	0.999512	1.33216	1.741	CTBP2;WNT3A;HEY2;ZIC1;TWIST1;FGF2;HDAC9;FGFR2
Axon Guidance WP5289	6/72	0.272084	0.999512	1.40755	1.83213	NTNG2;UNC5D;EPHB1;RHOD;MET;GNAI1
Peptide GPCRs WP24	6/72	0.272084	0.999512	1.40755	1.83213	CXCR2;CXCR5;TACR3;OPRK1;AGTR2;CCR3
Glycerophospholipid Biosynthetic Pathway WP2533	3/30	0.273747	0.999512	1.71966	2.2279	PGS1;CHPT1;CRLS1
Familial Partial Lipodystrophy WP5102	3/30	0.273747	0.999512	1.71966	2.2279	FABP4;LPL;ZMPSTE24
4P16 3 Copy Number Variation WP5365	3/30	0.273747	0.999512	1.71966	2.2279	PLCG1;UBE2J2;FGF2
15Q11Q13 Copy Number Variation WP5407	5/58	0.275904	0.999512	1.46047	1.88065	FANCD2;CHRNA7;NSMCE2;FAN1;TJP2
MAP3K1 Role In Promoting And Blocking Gonadal Determination WP4872	2/17	0.276549	0.999512	2.0632	2.65198	RHOA;FGFR2
Metabolic Pathway Of LDL HDL And TG Including Diseases WP4522	2/17	0.276549	0.999512	2.0632	2.65198	LPL;APOB
Amplification And Expansion Of Oncogenic Pathways WP3678	2/17	0.276549	0.999512	2.0632	2.65198	POSTN;JAG1
Mitochondrial Long Chain Fatty Acid Beta Oxidation WP368	2/17	0.276549	0.999512	2.0632	2.65198	ACSL1;ACSL4
ACE Inhibitor Pathway WP554	2/17	0.276549	0.999512	2.0632	2.65198	MAS1;AGTR2
Perturbations Host Cell Autophagy Induced By SARS CoV 2 Prots WP4936	4/44	0.277498	0.999512	1.54789	1.98431	ATG3;RB1CC1;APOB;ATG5
Vasopressin Regulated Water Reabsorption WP5085	4/44	0.277498	0.999512	1.54789	1.98431	DYNC2H1;DYNC1LI1;CREB3L2;RAB11A
Bardet Biedl Syndrome WP5234	7/88	0.286432	0.999512	1.33808	1.67294	DYNC2H1;FLCN;BBS1;IFT81;EFHC2;CFAP410;BMAL1
Prostaglandin And Leukotriene Metabolism In Senescence WP5122	3/31	0.290624	0.999512	1.65815	2.04902	PTGER3;PLA2G4A;GNAI1
Eicosanoid Metabolism Via Cyclooxygenases COX WP4719	3/31	0.290624	0.999512	1.65815	2.04902	ACOX1;CYP4A22;PLA2G4A
Base Excision Repair WP4752	3/31	0.290624	0.999512	1.65815	2.04902	FEN1;POLL;LIG3
Burn Wound Healing WP5055	6/74	0.293313	0.999512	1.366	1.67543	LGALS1;CHRNA7;CXCR2;S100A9;FGFR2;KRT6A
Genes Related To Primary Cilium Development Based On CRISPR WP4536	8/104	0.297378	0.999512	1.29032	1.56484	DYNC2H1;BBS1;IFT81;B9D1;CIBAR1;PIBF1;CEP76;CEP44
NF1 Copy Number Variation Syndrome WP5366	8/104	0.297378	0.999512	1.29032	1.56484	H3C8;H4C9;ATAD5;H4C3;E2F6;RHOA;RAB11A;EIF3A
MFAP5 Effect On Permeability And Motility Of Endothelial Cells WP4560	2/18	0.299575	0.999512	1.93415	2.3314	PLCG1;VCL
Nephrogenesis WP5052	2/18	0.299575	0.999512	1.93415	2.3314	JAG1;WNT3A
GLP 1 From Intestine And Pancreas Role In Glucose Homeostasis WP5452	1/6	0.313459	0.999512	3.0939	3.5892	GCG
Gamma Glutamyl Cycle For Glutathione Including Diseases WP4518	1/6	0.313459	0.999512	3.0939	3.5892	GGCT
SCFA And Skeletal Muscle Substrate Metabolism WP4030	1/6	0.313459	0.999512	3.0939	3.5892	GCG
Cellular Proteostasis WP4918	1/6	0.313459	0.999512	3.0939	3.5892	VBP1
miRNA Biogenesis WP2338	1/6	0.313459	0.999512	3.0939	3.5892	TARBP2
Joubert Syndrome WP4656	6/76	0.314856	0.999512	1.32683	1.53334	BBS1;MYO6;ANKS6;B9D1;PIBF1;RHOA
Selenium Metabolism And Selenoproteins WP28	4/47	0.319214	0.999512	1.43967	1.64395	GPX1;TXNRD3;SP3;MSRB1
Mitochondrial Fatty Acid Oxidation Disorders WP5123	2/19	0.322476	0.999512	1.82028	2.06006	ACSL1;ACSL4
Small Ligand GPCRs WP247	2/19	0.322476	0.999512	1.82028	2.06006	PTGER3;S1PR3
MAPK Signaling WP382	17/246	0.326628	0.999512	1.14985	1.2866	MAX;LRRK2;PLA2G4A;MAPK8IP2;MAPK14;MAPK8IP3;FGF2;RASGRP4;CACNA1H;RAP1B;CACNB2;PPP3CB;CACNB3;RPS6KA5;GNA12;FGF12;FGFR2
Omega 6 Fatty Acids In Senescence WP5424	4/48	0.333241	0.999512	1.40688	1.546	CBR1;GPX1;PLA2G4A;DECR1
Oxidation By Cytochrome P450 WP43	5/63	0.336244	0.999512	1.33421	1.45418	CYB5A;CYB5R4;CYP2W1;CYP4A22;CYP4F3
Prostaglandin And Leukotriene Metabolism In Senescence WP5321	3/34	0.341525	0.999512	1.49744	1.60876	PTGER3;PLA2G4A;GNAI1
Leukocyte Intrinsic Hippo Pathway Functions WP4542	3/34	0.341525	0.999512	1.49744	1.60876	LPL;MAPK14;RHOA
Alstrom Syndrome WP5202	3/34	0.341525	0.999512	1.49744	1.60876	CIMAP3;RILPL1;IFT81
Hereditary Leiomyomatosis And Renal Cell Carcinoma Pathway WP4206	2/20	0.345182	0.999512	1.71906	1.82854	EGLN1;LDHA
Cell Differentiation Expanded Index WP2023	2/20	0.345182	0.999512	1.71906	1.82854	BORCS8-MEF2B;MEF2B
NRF2 Pathway WP2884	10/141	0.353497	0.999512	1.18172	1.22884	ALDH3A1;CBR1;SLC6A8;TXNRD3;SLC2A10;MGST3;SLC6A14;MGST2;PRDX6;SLC2A6
SARS CoV 2 And ACE2 Receptor Molecular Mechanisms WP4883	1/7	0.355179	0.999512	2.57812	2.6687	MAS1
Vitamin B6 Dependent And Responsive Disorders WP4228	1/7	0.355179	0.999512	2.57812	2.6687	ALPI
Arachidonate Epoxygenase Epoxide Hydrolase WP678	1/7	0.355179	0.999512	2.57812	2.6687	COX5A
COVID 19 Thrombosis And Anticoagulation WP4927	1/7	0.355179	0.999512	2.57812	2.6687	F2
GLP 1 In Pancreatic Islet Cells WP5447	1/7	0.355179	0.999512	2.57812	2.6687	GCG
Pentose Phosphate Metabolism WP134	1/7	0.355179	0.999512	2.57812	2.6687	TKT
Urea Cycle And Metabolism Of Amino Groups WP497	2/21	0.367632	0.999512	1.6285	1.62959	ARG2;ASS1
GNAQ Pathways In Port Wine Stain WP5437	2/21	0.367632	0.999512	1.6285	1.62959	TRIO;RHOA
Wnt Signaling In Kidney Disease WP4150	3/36	0.375346	0.999512	1.40654	1.37828	WNT5B;WNT3A;RHOA
Zinc Homeostasis WP3529	3/36	0.375346	0.999512	1.40654	1.37828	SLC30A2;MT1F;MT1X
Male Infertility WP4673	10/145	0.38644	0.999512	1.14646	1.09003	USP8;GPX1;XRCC2;ERCC2;MOV10L1;AHRR;APOB;BMAL1;MSMB;CTCFL
Glycerolipids And Glycerophospholipids WP4722	2/22	0.389773	0.999512	1.54699	1.45756	CHPT1;CRLS1
Blood Clotting Cascade WP272	2/22	0.389773	0.999512	1.54699	1.45756	F2;F5
Thymic Stromal Lymphopoietin TSLP Signaling WP2203	3/37	0.392132	0.999512	1.3651	1.27795	YES1;MAPK14;CRLF2
Transcription Factors Regulate miRNAs Cardiac Hypertrophy WP1559	1/8	0.394365	0.999512	2.2097	2.05607	MYEF2
Glucose Metabolism In Triple Negative Breast Cancer Cells WP5211	1/8	0.394365	0.999512	2.2097	2.05607	LDHA
EPAC1 And PKA Reduction Of Retinal Inflammation WP5440	1/8	0.394365	0.999512	2.2097	2.05607	RAPGEF3
Dual Hijack Model Of Vif In HIV Infection WP3300	1/8	0.394365	0.999512	2.2097	2.05607	ELOC
Mitochondrial Complex II Assembly WP4920	1/8	0.394365	0.999512	2.2097	2.05607	SDHAF4
Non Classical Role Of Vitamin D WP5133	1/8	0.394365	0.999512	2.2097	2.05607	AGTR2
Ketogenesis And Ketolysis WP4742	1/8	0.394365	0.999512	2.2097	2.05607	ACAT1
Hunger And Satiety WP5445	1/8	0.394365	0.999512	2.2097	2.05607	GCG
Serine Metabolism WP4688	1/8	0.394365	0.999512	2.2097	2.05607	DHFR
Gastrin Signaling WP4659	8/115	0.399088	0.999512	1.15699	1.06278	BORCS8-MEF2B;MEF2B;JAG1;YES1;PLCG1;MAPK14;RHOD;RHOA
Cardiac Progenitor Differentiation WP2406	4/53	0.403408	0.999512	1.26298	1.14654	WNT3A;MAPK14;FGF2;MYLK3
Striated Muscle Contraction Pathway WP383	3/38	0.408801	0.999512	1.32603	1.18617	MYBPC1;TNNC1;MYH8
Folate Metabolism WP176	5/69	0.409739	0.999512	1.20874	1.07848	DHFR;GPX1;HBB;F2;APOB
Roles Of Ceramides In Development Of Insulin Resistance WP5181	2/23	0.411561	0.999512	1.47325	1.30795	ACSL1;CD36
LDL Influence On CD14 And TLR4 WP5272	2/23	0.411561	0.999512	1.47325	1.30795	CREB3L2;MAPK14
Eicosanoid Synthesis WP167	2/23	0.411561	0.999512	1.47325	1.30795	CBR1;PLA2G4A
Phosphodiesterases In Neuronal Function WP4222	4/54	0.417325	0.999512	1.23765	1.08157	PDE1C;CHRNA7;CAMK2A;DRD2
Vitamin B12 Metabolism WP1533	4/54	0.417325	0.999512	1.23765	1.08157	HBB;MMUT;F2;APOB
Selenium Micronutrient Network WP15	6/86	0.424622	0.999512	1.16036	0.993913	GPX1;TXNRD3;HBB;F2;APOB;MSRB1
Osteoblast Differentiation And Related Diseases WP4787	8/118	0.427174	0.999512	1.12525	0.957102	JAG1;WNT5B;WNT3A;HEY2;SMAD9;MAPK14;FGF2;FGFR2
Regulation Of Actin Cytoskeleton WP51	10/150	0.427864	0.999512	1.10522	0.938273	CFL2;CHRM5;GNA12;ARHGEF4;F2;FGF2;FGF12;VCL;FGFR2;RHOA
Overlap Between Signal Transduction Pathways LMNA Laminopathies WP4879	4/55	0.431166	0.999512	1.21332	1.02072	MAOB;TARBP2;TMPO;ZMPSTE24
Cardiac Hypertrophic Response WP2795	4/55	0.431166	0.999512	1.21332	1.02072	MAPK14;FGF2;HDAC9;FGFR2
SARS CoV 2 B 1 1 7 Variant Antagonises Innate Immune Activation WP5116	1/9	0.431172	0.999512	1.93338	1.62645	TOMM70
Eicosanoid Metab Via Cytochrome P450 Monooxygenases Pathway WP4720	1/9	0.431172	0.999512	1.93338	1.62645	CYP4A22
Acetaminophen In Analgesia And Antipyresis WP5444	1/9	0.431172	0.999512	1.93338	1.62645	CACNA1H
Hemesynthesis Defects And Porphyrias WP5169	1/9	0.431172	0.999512	1.93338	1.62645	UROS
Urea Cycle And Related Diseases WP4571	1/9	0.431172	0.999512	1.93338	1.62645	ASS1
Mitochondrial Beta Oxidation WP5241	1/9	0.431172	0.999512	1.93338	1.62645	DECR1
Heme Biosynthesis WP561	1/9	0.431172	0.999512	1.93338	1.62645	UROS
Effects Of MFN2 Mutation WP5443	2/24	0.432955	0.999512	1.40621	1.17716	DYNC2H1;MFN2
Kallmann Syndrome WP5074	2/24	0.432955	0.999512	1.40621	1.17716	CHD7;PROK2
Parkin Ubiquitin Proteasomal System Pathway WP2359	5/71	0.434076	0.999512	1.17199	0.978067	PRKN;PSMD12;GPR37;PSMD14;UBE2J2
Leptin Signaling WP2034	5/71	0.434076	0.999512	1.17199	0.978067	CFL2;KPNA4;PLCG1;MAPK14;RHOA
PDGF Pathway WP2526	3/40	0.441688	0.999512	1.25421	1.02488	PLA2G4A;PLCG1;RHOA
Ras Signaling WP4223	12/184	0.442674	0.999512	1.07945	0.87967	RAP1B;PLA2G12A;PLA2G3;PLA2G4A;PLAAT3;RASAL2;PLCG1;MET;RASGRP4;TTBK1;FGFR2;RHOA
Effect Of Omega 3 PUFA On Huntington 39 S Disease Pathways WP5470	8/120	0.445837	0.999512	1.10504	0.892656	GABRB3;GABRB2;RPS6KA5;SLC12A5;BNIP3;GABRA4;HAP1;GABRG2
Primary Focal Segmental Glomerulosclerosis FSGS WP2572	5/72	0.446165	0.999512	1.15443	0.931706	KIRREL3;TRPC6;JAG1;PLCG1;VCL
Brain Derived Neurotrophic Factor BDNF Signaling WP2380	9/137	0.453917	0.999512	1.08774	0.859146	GABRB3;LINGO1;RPS6KA5;CAMK2A;RANBP9;PLCG1;EIF2S2;MAPK14;EIF2S1
Differentiation Of White And Brown Adipocyte WP2895	2/25	0.453924	0.999512	1.34499	1.06231	ZIC1;SMAD9
Glycosylation And Related Congenital Defects WP4521	2/25	0.453924	0.999512	1.34499	1.06231	DPM1;PMM2
Mammalian Disorder Of Sexual Development WP4842	2/25	0.453924	0.999512	1.34499	1.06231	CBX2;FGFR2
Thyroxine Thyroid Hormone Production WP1981	2/25	0.453924	0.999512	1.34499	1.06231	RAP1B;TRH
SARS CoV 2 And COVID 19 Pathway WP4846	1/10	0.465744	0.999512	1.71847	1.31312	ACAT1
Non Homologous End Joining WP438	1/10	0.465744	0.999512	1.71847	1.31312	POLL
Affected Pathways In Duchenne Muscular Dystrophy WP5356	5/74	0.470135	0.999512	1.12085	0.845948	CACNB2;TRPC6;SLN;PLA2G4A;VDAC1
Thyroid Stimulating Hormone TSH Signaling WP2032	4/58	0.472095	0.999512	1.14573	0.859959	RAP1B;GNA12;MAPK14;GNAI1
Metabolic Reprogramming In Colon Cancer WP4290	3/42	0.473839	0.999512	1.18977	0.888623	LDHA;PPAT;TKT
SARS CoV 2 Mt Chronic Ox Stress And Endothelial Dysfunction WP5183	2/26	0.474441	0.999512	1.28888	0.961016	TOMM70;NDUFAF2
COVID 19 Structural Coverage Map WP5145	2/26	0.474441	0.999512	1.28888	0.961016	TOMM70;PAIP1
Glucuronidation WP698	2/26	0.474441	0.999512	1.28888	0.961016	PGM5;PGM1
G Protein Signaling WP35	6/91	0.478924	0.999512	1.09181	0.803805	GNAZ;PDE1C;GNA12;AKAP6;RHOA;GNAI1
Sudden Infant Death Syndrome SIDS Susceptibility Pathways WP706	10/157	0.485506	0.999512	1.05219	0.760276	CHRNB4;CHRNA7;SP3;ATP1A3;HTR3A;SCN3B;SLC25A4;HDAC9;HSP90B1;HSPD1
FGFR3 Signal Chondrocyte Proliferation Terminal Differentiation WP4767	2/27	0.494482	0.999512	1.23726	0.871336	MAPK14;ATG5
Intracellular Trafficking Proteins Involved In CMT Neuropathy WP4856	2/27	0.494482	0.999512	1.23726	0.871336	MFN2;RAB11A
Photodynamic Therapy Induced Unfolded Protein Response WP3613	2/27	0.494482	0.999512	1.23726	0.871336	DNAJB9;HSP90B1
Alternative Pathway Of Fetal Androgen Synthesis WP4524	1/11	0.498216	0.999512	1.54654	1.07751	CYB5A
Gene Regulatory Network Modeling Somitogenesis WP2854	1/11	0.498216	0.999512	1.54654	1.07751	WNT3A
UDP Derived Sugars Synthesis In Fibroblasts WP5394	1/11	0.498216	0.999512	1.54654	1.07751	PGM1
Iron Metabolism In Placenta WP2007	1/11	0.498216	0.999512	1.54654	1.07751	ACO1
Glycolysis In Senescence WP5049	1/11	0.498216	0.999512	1.54654	1.07751	LDHA
GABA Metabolism Aka GHB WP4157	1/11	0.498216	0.999512	1.54654	1.07751	MAOB
IDO Metabolic Pathway WP5414	1/11	0.498216	0.999512	1.54654	1.07751	KYAT3
ATR Signaling WP3875	1/11	0.498216	0.999512	1.54654	1.07751	RAD1
Renin Angiotensin Aldosterone System RAAS WP4756	3/44	0.505113	0.999512	1.13161	0.772861	CAMK2A;CREB3L2;AGTR2
GPCRs Class A Rhodopsin Like WP455	16/259	0.50946	0.999512	1.01824	0.686706	GPR15;GPR37;OR1D2;PTGER3;CHRM5;CXCR5;GPR63;OR1I1;OPRK1;GPR37L1;MAS1;HCAR1;CXCR2;AGTR2;DRD2;CCR3
Eicosanoid Metabolism Via Lipooxygenases LOX WP4721	2/28	0.51403	0.999512	1.18961	0.791656	ACOX1;CYP4A22
Dravet Syndrome WP5200	2/28	0.51403	0.999512	1.18961	0.791656	CAMK2A;SCN3B
Prostaglandin Synthesis And Regulation WP98	3/45	0.520383	0.999512	1.10461	0.721519	CBR1;PTGER3;PLA2G4A
Aryl Hydrocarbon Receptor Pathway WP2873	3/45	0.520383	0.999512	1.10461	0.721519	ALDH3A1;AHRR;POLK
Nephrotic Syndrome WP4758	3/45	0.520383	0.999512	1.10461	0.721519	TRPC6;PMM2;ZMPSTE24
10Q22Q23 Copy Number Variation WP5402	4/62	0.524825	0.999512	1.06649	0.687555	MAS1;GPR15;NRG3;ROPN1L
TAR Syndrome WP5362	4/62	0.524825	0.999512	1.06649	0.687555	BCL2L13;ITGA10;HLA-G;MET
HDAC6 Interactions In The Central Nervous System WP5426	7/112	0.524883	0.999512	1.03091	0.6645	PRKN;MIIP;TWIST1;ATP13A2;KALRN;RAD23B;HDAC9
Complement Mediated Inflam Of Pulmonary Alveolus In COV19 WP5148	1/12	0.528716	0.999512	1.40587	0.895966	C8A
Nanoparticle Triggered Regulated Necrosis WP2513	1/12	0.528716	0.999512	1.40587	0.895966	PLA2G4A
Enterohepatic Circulation Of Bile Acids WP5396	1/12	0.528716	0.999512	1.40587	0.895966	SLC51B
PtdIns 4 5 P2 In Cytokinesis Pathway WP5199	1/12	0.528716	0.999512	1.40587	0.895966	RHOA
Biomarkers For Urea Cycle Disorders WP4583	1/12	0.528716	0.999512	1.40587	0.895966	ASS1
Alanine And Aspartate Metabolism WP106	1/12	0.528716	0.999512	1.40587	0.895966	ASS1
TGFB Smad Signaling WP5382	1/12	0.528716	0.999512	1.40587	0.895966	POSTN
Aerobic Glycolysis WP4629	1/12	0.528716	0.999512	1.40587	0.895966	LDHA
Extracellular Vesicle Mediated Signaling In Recipient Cells WP2870	2/29	0.533071	0.999512	1.14549	0.72063	WNT3A;MET
Statin Inhibition Of Cholesterol Production WP430	2/29	0.533071	0.999512	1.14549	0.72063	LPL;APOB
RAS And Bradykinin Pathways In COVID 19 WP4969	2/29	0.533071	0.999512	1.14549	0.72063	AGTR2;RHOA
Cannabinoid Receptor Signaling WP3869	2/29	0.533071	0.999512	1.14549	0.72063	NAPEPLD;MAPK14
One Carbon Metabolism WP241	2/29	0.533071	0.999512	1.14549	0.72063	DHFR;MTHFD1L
Wnt Signaling WP428	7/113	0.534427	0.999512	1.02112	0.639796	VANGL1;PPP3CB;WNT5B;CTBP2;WNT3A;CAMK2A;RHOA
Aryl Hydrocarbon Receptor Pathway WP2586	3/46	0.535394	0.999512	1.07886	0.674022	LPL;AHRR;CD36
VEGFA VEGFR2 Signaling WP3888	26/430	0.539284	0.999512	0.9949	0.614363	HDAC9;RPL7;RAP1B;LDHA;RPS6KA5;MYO6;CAPN2;DNAJB9;PLCG1;ELOC;ABCF2;ZC3H15;DECR1;JAG1;GPX1;SSR3;PLA2G4A;RHOC;MAPK14;PRDX6;QKI;RHOA;RAB11A;DPM1;TKT;VCL
Cholesterol Metab With Bloch And Kandutsch Russell Pathways WP4718	3/47	0.550133	0.999512	1.05429	0.630036	ACSL1;ACSL4;TM7SF2
GPR143 In Melanocytes And Retinal Pigment Epithelium Cells WP4941	2/30	0.551594	0.999512	1.10452	0.657128	PMEL;MLANA
Oligodendrocyte Differentiation Leading To Myelin For CNS WP4304	2/30	0.551594	0.999512	1.10452	0.657128	MOG;FGF2
GDNF RET Signaling Axis WP4830	2/30	0.551594	0.999512	1.10452	0.657128	SOX11;AGTR2
BMP2 WNT4 FOXO1 Pathway Primary Endometrial Stromal Cell Diff WP3876	1/13	0.557364	0.999512	1.28865	0.753261	SMAD9
Vitamin K Metabolism And Activation Of Dependent Proteins WP5186	1/13	0.557364	0.999512	1.28865	0.753261	F2
Cell Type Dependent Selectivity Of CCK2R Signaling WP3679	1/13	0.557364	0.999512	1.28865	0.753261	GNAI1
Mevalonate Arm Of Cholesterol Biosynthesis Pathway WP4190	1/13	0.557364	0.999512	1.28865	0.753261	ACAT1
Ganglio Series Sphingolipid Metabolism WP5299	1/13	0.557364	0.999512	1.28865	0.753261	ST3GAL1
Disorders Of Galactose Metabolism WP5173	1/13	0.557364	0.999512	1.28865	0.753261	PGM1
Ganglio Sphingolipid Metabolism WP1423	1/13	0.557364	0.999512	1.28865	0.753261	ST3GAL1
Familial Hyperlipidemia Type 3 WP5110	1/13	0.557364	0.999512	1.28865	0.753261	LPL
Lactate Shuttle In Glial Cells WP5314	1/13	0.557364	0.999512	1.28865	0.753261	LDHA
Aerobic Glycolysis Augmented WP4628	1/13	0.557364	0.999512	1.28865	0.753261	LDHA
Estrogen Receptor Pathway WP2881	1/13	0.557364	0.999512	1.28865	0.753261	ACOX1
Homologous Recombination WP186	1/13	0.557364	0.999512	1.28865	0.753261	RAD54B
Vitamin B12 Disorders WP4271	1/13	0.557364	0.999512	1.28865	0.753261	MMUT
Dopamine Metabolism WP2436	1/13	0.557364	0.999512	1.28865	0.753261	MAOB
Neuroinflammation WP4919	1/13	0.557364	0.999512	1.28865	0.753261	MAPK14
Ferroptosis WP4313	4/65	0.562645	0.999512	1.01388	0.583087	ACSL1;CISD1;ACSL4;ATG5
Microtubule Cytoskeleton Regulation WP2038	3/48	0.564593	0.999512	1.0308	0.589259	TRIO;WNT3A;CFL2
Pancreatic Cancer Subtypes WP5390	3/48	0.564593	0.999512	1.0308	0.589259	CTSV;LEMD1;KRT6A
Ciliopathies WP4803	11/184	0.566157	0.999512	0.982909	0.55916	DYNC2H1;BBS1;FLCN;CFAP52;IFT81;ANKS6;B9D1;CFAP410;PIBF1;SPATA7;TAPT1
Ethanol Effects On Histone Modifications WP3996	2/31	0.569592	0.999512	1.06638	0.600196	DHFR;HDAC9
16P11 2 Distal Deletion Syndrome WP4950	2/31	0.569592	0.999512	1.06638	0.600196	SLN;TUFM
Calcium Regulation In Cardiac Cells WP536	9/151	0.572273	0.999512	0.979767	0.546847	GNAZ;PKIB;CACNB3;FXYD2;CHRM5;CAMK2A;CASQ2;ATP1B3;GNAI1
Interleukin 1 IL 1 Structural Pathway WP2637	3/49	0.578764	0.999512	1.00834	0.551421	RPS6KA5;IRAK2;MAPK14
Wnt Signaling And Pluripotency WP399	6/101	0.581914	0.999512	0.976361	0.528634	WNT5B;CTBP2;WNT3A;PPP2R5E;LRRK2;RHOA
Mod Of PI3K Akt mTOR Signaling By Bioactive Sphingolipids WP5192	1/14	0.584272	0.999512	1.18946	0.639201	S1PR3
Kennedy Pathway From Sphingolipids WP3933	1/14	0.584272	0.999512	1.18946	0.639201	CHPT1
Disorders Of Fructose Metabolism WP5178	1/14	0.584272	0.999512	1.18946	0.639201	PGM1
Riboflavin And CoQ Disorders WP5037	1/14	0.584272	0.999512	1.18946	0.639201	ETFA
Glucocorticoid Biosynthesis WP5280	1/14	0.584272	0.999512	1.18946	0.639201	CBR1
Initiation Of Transcription And Translation Elongation HIV1 LTR WP3414	2/32	0.58706	0.999512	1.03078	0.549022	PPP3CB;HDAC9
13Q12 12 Copy Number Variation WP5406	2/32	0.58706	0.999512	1.03078	0.549022	LINGO1;RHOA
Endothelin Pathways WP2197	2/32	0.58706	0.999512	1.03078	0.549022	CALCRL;GNAI1
Monoamine Transport WP727	2/32	0.58706	0.999512	1.03078	0.549022	MAPK14;FBXO32
Primary Ovarian Insufficiency WP5316	10/170	0.588028	0.999512	0.966027	0.512942	PCMT1;DCAF17;XRCC2;CBX2;PMM2;TWNK;POLR3H;AGTR2;EIF2S2;RCBTB1
Disruption Of Postsynaptic Signaling By CNV WP4875	2/33	0.603996	0.999512	0.997474	0.502914	NLGN4X;CAMK2A
Mitochondrial Immune Response To SARS CoV 2 WP5038	2/33	0.603996	0.999512	0.997474	0.502914	TOMM70;AGTR2
Resistin As A Regulator Of Inflammation WP4481	2/33	0.603996	0.999512	0.997474	0.502914	PLCG1;MAPK14
Signal Transduction Through IL1R WP4496	2/33	0.603996	0.999512	0.997474	0.502914	IRAK2;MAPK14
Alpha 6 Beta 4 Signaling WP244	2/33	0.603996	0.999512	0.997474	0.502914	MAPK14;RHOA
Tryptophan Metabolism WP465	2/33	0.603996	0.999512	0.997474	0.502914	KYAT3;ACAT1
BDNF TrkB Signaling WP3676	2/33	0.603996	0.999512	0.997474	0.502914	TRPC6;PLCG1
Monoamine GPCRs WP58	2/33	0.603996	0.999512	0.997474	0.502914	CHRM5;DRD2
Copper Homeostasis WP3286	3/51	0.606219	0.999512	0.966223	0.483609	MT1F;MT1X;STEAP1
Mammary Gland Development Pathway Embryonic Development Stg 1/4 WP2813	1/15	0.609545	0.999512	1.10444	0.546744	NRG3
GPCRs Class C Metabotropic Glutamate Pheromone WP501	1/15	0.609545	0.999512	1.10444	0.546744	GRM3
Familial Hyperlipidemia Type 5 WP5112	1/15	0.609545	0.999512	1.10444	0.546744	LPL
Iron Sulfur Cluster Biogenesis WP5152	1/15	0.609545	0.999512	1.10444	0.546744	GLRX5
GPR40 Pathway WP3958	1/15	0.609545	0.999512	1.10444	0.546744	PLCG1
Trans Sulfuration One Carbon Metabolism And Related Pathways WP2525	4/69	0.610389	0.999512	0.95128	0.469608	DHFR;GPX1;MTHFD1L;CHPT1
Th17 Cell Differentiation Pathway WP5130	4/69	0.610389	0.999512	0.95128	0.469608	NFIL3;PLCG1;MAPK14;BMAL1
Hepatocyte Growth Factor Receptor Signaling WP313	2/34	0.620401	0.999512	0.966251	0.461278	RAP1B;MET
Type 2 Papillary Renal Cell Carcinoma WP4241	2/34	0.620401	0.999512	0.966251	0.461278	EGLN1;ELOC
Purinergic Signaling WP4900	2/34	0.620401	0.999512	0.966251	0.461278	GNAZ;GNAI1
Cytoplasmic Ribosomal Proteins WP477	5/88	0.625325	0.999512	0.931096	0.437134	RPL4;RPL37A;RPL9;RPS13;RPL7
Alzheimer 39 S Disease And miRNA Effects WP2059	15/261	0.625625	0.999512	0.942022	0.441813	PSMD12;WNT5B;PSMD14;WNT3A;CHRNA7;LPL;EIF2S1;PPP3CB;PSMB5;ATG101;RB1CC1;CAPN2;VDAC1;NRBF2;SLC25A4
Alzheimer 39 S Disease WP5124	15/261	0.625625	0.999512	0.942022	0.441813	PSMD12;WNT5B;PSMD14;WNT3A;CHRNA7;LPL;EIF2S1;PPP3CB;PSMB5;ATG101;RB1CC1;CAPN2;VDAC1;NRBF2;SLC25A4
Apoptosis Related Network Due To Altered Notch3 Ovarian Cancer WP2864	3/53	0.632456	0.999512	0.927475	0.424917	SERBP1;RNF7;HSPD1
Classcl Pathway Steroidogenesis W Glucocort Mineralocort Metab WP4523	1/16	0.633283	0.999512	1.03075	0.470887	CYB5A
Airway Smooth Muscle Cell Contraction WP4962	1/16	0.633283	0.999512	1.03075	0.470887	RHOA
Sulfation Biotransformation Reaction WP692	1/16	0.633283	0.999512	1.03075	0.470887	SULT4A1
Hedgehog Signaling WP47	1/16	0.633283	0.999512	1.03075	0.470887	BMAL1
Influence Of Laminopathies On Wnt Signaling WP4844	2/35	0.636275	0.999512	0.936921	0.423604	TARBP2;ZMPSTE24
IL1 Signaling WP195	3/54	0.645111	0.999512	0.909241	0.39855	IRAK2;PLCG1;MAPK14
MECP2 And Associated Rett Syndrome WP3584	4/73	0.654783	0.999512	0.895942	0.379388	CAMK2A;SP3;OPRK1;FGF2
P53 Transcriptional Gene Network WP4963	5/91	0.654821	0.999512	0.898472	0.380407	GPX1;TRAF4;MSH2;POLK;ULBP2
GPCRs Other WP117	5/91	0.654821	0.999512	0.898472	0.380407	ADGRE2;GPR176;ADGRV1;CXCR2;ADGRL2
TGF Beta In Thyroid Cells For Epithelial Mesenchymal Transition WP3859	1/17	0.655578	0.999512	0.966279	0.407999	CDH16
Involvement Of Secretase In Neurodegenerative Diseases WP5372	1/17	0.655578	0.999512	0.966279	0.407999	MAOB
NOTCH1 Regulation Of Endothelial Cell Calcification WP3413	1/17	0.655578	0.999512	0.966279	0.407999	JAG1
Canonical And Non Canonical TGF B Signaling WP3874	1/17	0.655578	0.999512	0.966279	0.407999	MAPK14
ERK Pathway In Huntington 39 S Disease WP3853	1/17	0.655578	0.999512	0.966279	0.407999	RPS6KA5
miR 509 3P Alteration Of YAP1 ECM Axis WP3967	1/17	0.655578	0.999512	0.966279	0.407999	TWIST1
Drug Induction Of Bile Acid Pathway WP2289	1/17	0.655578	0.999512	0.966279	0.407999	SLC51B
Iron Metabolism Disorders WP5172	1/17	0.655578	0.999512	0.966279	0.407999	UQCRFS1
NRXN1 Deletion Syndrome WP5398	1/17	0.655578	0.999512	0.966279	0.407999	NLGN4X
Cori Cycle WP1946	1/17	0.655578	0.999512	0.966279	0.407999	LDHA
Metabolic Epileptic Disorders WP5355	5/92	0.664315	0.999512	0.888097	0.36323	LDHC;LDHA;ACO1;ASS1;ACAT1
Melatonin Metabolism And Effects WP3298	2/37	0.666452	0.999512	0.883288	0.358427	CAMK2A;BMAL1
Neovascularization Processes WP4331	2/37	0.666452	0.999512	0.883288	0.358427	JAG1;SMAD9
11P11 2 Copy Number Variation Syndrome WP5348	3/56	0.669484	0.999512	0.874837	0.351026	VANGL1;SPPL2C;BMAL1
Familial Hyperlipidemia Type 1 WP5108	1/18	0.67652	0.999512	0.90939	0.355384	LPL
Sleep Regulation WP3591	2/38	0.680766	0.999512	0.858707	0.330204	DRD2;NPAS2
G13 Signaling WP524	2/38	0.680766	0.999512	0.858707	0.330204	CFL2;RHOA
Adipogenesis WP236	7/131	0.68988	0.999512	0.872056	0.32374	BORCS8-MEF2B;MEF2B;WNT5B;CISD1;TWIST1;LPL;ZMPSTE24
Pre Implantation Embryo WP3527	3/58	0.692608	0.999512	0.842934	0.309602	ESRRA;CELF3;SOX11
Disorders Of Folate Metabolism And Transport WP4259	1/19	0.696189	0.999512	0.858823	0.311009	DHFR
Serotonin Receptor 4 6 7 And NR3C Signaling WP734	1/19	0.696189	0.999512	0.858823	0.311009	RPS6KA5
Farnesoid X Receptor Pathway WP2879	1/19	0.696189	0.999512	0.858823	0.311009	IP6K3
Glutathione Metabolism WP100	1/19	0.696189	0.999512	0.858823	0.311009	GPX1
Cholestasis WP5238	1/19	0.696189	0.999512	0.858823	0.311009	TJP2
TGF Beta Signaling Pathway WP366	7/132	0.697455	0.999512	0.865033	0.311686	COPS5;NEDD4L;STRAP;MAPK14;MET;RHOA;UCHL5
MET In Type 1 Papillary Renal Cell Carcinoma WP4205	3/59	0.703703	0.999512	0.827838	0.290901	RAP1B;PLCG1;MET
Glycogen Synthesis And Degradation WP500	2/40	0.707883	0.999512	0.813425	0.281019	PPP2R5E;PGM1
ATM Signaling WP2516	2/40	0.707883	0.999512	0.813425	0.281019	CRADD;FANCD2
Novel Intracellular Components Of RIG I Like Receptor Pathway WP3865	3/60	0.71449	0.999512	0.813271	0.273411	AZI2;MAPK14;ATG5
10Q11 21Q11 23 Copy Number Variation Syndrome WP5352	3/60	0.71449	0.999512	0.813271	0.273411	SMAD9;RGMB;BMAL1
Autophagy In Pancreatic Ductal Adenocarcinoma WP5331	1/20	0.714663	0.999512	0.813578	0.273317	PRKN
BMP Signaling In Eyelid Development WP3927	1/20	0.714663	0.999512	0.813578	0.273317	FGFR2
Ether Lipid Biosynthesis WP5275	1/20	0.714663	0.999512	0.813578	0.273317	FAR1
Hypertrophy Model WP516	1/20	0.714663	0.999512	0.813578	0.273317	IFRD1
Hippo Signaling Regulation WP4540	5/98	0.717638	0.999512	0.830534	0.275563	CDH16;MET;FGFR2;RHOA;CDH19
Nucleotide Binding Oligomerization Domain NOD Pathway WP1433	2/41	0.720705	0.999512	0.792525	0.259572	CARD9;SUGT1
Embryonic Stem Cell Pluripotency Pathways WP3931	6/117	0.721779	0.999512	0.834909	0.272211	WNT5B;WNT3A;SMAD9;FGF2;FGF12;FGFR2
Cancer Pathways WP5434	28/507	0.727486	0.999512	0.901499	0.286821	CTBP2;MAX;MGST3;PTGER3;CAMK2A;MGST2;GNAI1;RASGRP4;HSP90B1;CKS1B;RPS6KA5;HEY2;GNA12;PLCG1;ELOC;POLK;EGLN1;JAG1;GSTO2;TXNRD3;WNT5B;WNT3A;F2;RHOA;MSH2;TRAF4;MET;FGFR2
STING Pathway In Kawasaki Like Disease And COVID 19 WP4961	1/21	0.732014	0.999512	0.772858	0.241097	GSDMD
Host Pathogen Interaction Of Human CoVs Apoptosis WP4864	1/21	0.732014	0.999512	0.772858	0.241097	MAPK14
FOXA2 Pathway WP5066	1/21	0.732014	0.999512	0.772858	0.241097	APOB
DNA IR Damage And Cellular Response Via ATR WP4016	4/81	0.732933	0.999512	0.802514	0.249342	FEN1;MSH2;FANCD2;RAD1
Splicing Factor NOVA Regulated Synaptic Proteins WP4148	2/42	0.733048	0.999512	0.772671	0.239948	CAV2;GABRG2
Metabolic Reprogramming In Pancreatic Cancer WP5220	2/42	0.733048	0.999512	0.772671	0.239948	PDHX;LDHA
DNA Replication WP466	2/42	0.733048	0.999512	0.772671	0.239948	ORC5;ORC4
Proteasome Degradation WP183	3/62	0.735147	0.999512	0.785618	0.241723	PSMD12;PSMB5;HLA-G
22Q11 2 Copy Number Variation Syndrome WP4657	6/119	0.736727	0.999512	0.820044	0.250555	PRKN;RANBP1;ZNF74;DRD2;BMAL1;FGFR2
Glioblastoma Signaling WP2261	4/82	0.741697	0.999512	0.792183	0.236716	CDKN2C;PLCG1;MET;FGFR2
Integrin Mediated Cell Adhesion WP185	5/101	0.741929	0.999512	0.804451	0.24013	RAP1B;CAV2;ITGA10;CAPN2;VCL
Cholesterol Biosynthesis Pathway In Hepatocytes WP5329	2/43	0.744924	0.999512	0.753785	0.22197	ACSL1;TM7SF2
Fibrin Complement Receptor 3 Signaling WP4136	2/43	0.744924	0.999512	0.753785	0.22197	IRAK2;RHOA
Endometrial Cancer WP4155	3/63	0.745024	0.999512	0.772483	0.227372	POLK;FGF2;FGFR2
Transcription Factor Regulation In Adipogenesis WP3599	1/22	0.748311	0.999512	0.736016	0.213398	TWIST1
Pathophysiological Roles Of DUX4 In FSHD1 WP5342	1/22	0.748311	0.999512	0.736016	0.213398	FBXO32
Methionine De Novo And Salvage Pathway WP3580	1/22	0.748311	0.999512	0.736016	0.213398	AMD1
PI3K AKT mTOR Vitamin D3 Signaling WP4141	1/22	0.748311	0.999512	0.736016	0.213398	LDHA
Vitamin D In Inflammatory Diseases WP4482	1/22	0.748311	0.999512	0.736016	0.213398	MAPK14
Progeria Associated Lipodystrophy WP5103	1/22	0.748311	0.999512	0.736016	0.213398	ZMPSTE24
Familial Hyperlipidemia Type 4 WP5111	1/22	0.748311	0.999512	0.736016	0.213398	LPL
Sildenafil Treatment WP5294	1/22	0.748311	0.999512	0.736016	0.213398	PRKN
Prader Willi And Angelman Syndrome WP3998	5/102	0.749676	0.999512	0.796115	0.229372	GABRB3;CDKN2C;TACR3;GABRG2;NUP58
3Q29 Copy Number Variation Syndrome WP4906	3/64	0.754604	0.999512	0.759779	0.213925	DYNC2H1;PIGM;SLC51B
G1 To S Cell Cycle Control WP45	3/64	0.754604	0.999512	0.759779	0.213925	ORC5;ORC4;CDKN2C
Genes Controlling Nephrogenesis WP4823	2/44	0.756343	0.999512	0.735799	0.205479	CD36;FGFR2
Notch Signaling WP268	2/44	0.756343	0.999512	0.735799	0.205479	JAG1;CTBP2
EGF EGFR Signaling WP437	8/159	0.75683	0.999512	0.817922	0.227887	USP8;RPS6KA5;CAV2;CAMK2A;REPS2;PLCG1;MAPK14;STAM2
Fragile X Syndrome WP4549	6/122	0.75806	0.999512	0.798708	0.221236	GABRB2;CAMK2A;PICK1;PLCG1;GABRG2;TARBP2
EGFR Tyrosine Kinase Inhibitor Resistance WP4806	4/84	0.758566	0.999512	0.772296	0.213405	PLCG1;FGF2;MET;FGFR2
Epithelial To Mesenchymal Transition In Colorectal Cancer WP4239	8/160	0.762872	0.999512	0.812497	0.219914	JAG1;WNT5B;WNT3A;PDCD6;TWIST2;TWIST1;STRAP;MAPK14
FGF23 Signaling In Hypophosphatemic Rickets Related Disorders WP4790	1/23	0.763618	0.999512	0.702524	0.189462	FGFR2
Photodynamic Therapy Induced NFE2L2 NRF2 Survival Signaling WP3612	1/23	0.763618	0.999512	0.702524	0.189462	MAPK14
Purine Metabolism And Related Disorders WP4224	1/23	0.763618	0.999512	0.702524	0.189462	PPAT
Unfolded Protein Response WP4925	1/23	0.763618	0.999512	0.702524	0.189462	EIF2S1
Complement Activation WP545	1/23	0.763618	0.999512	0.702524	0.189462	C8A
NRF2 ARE Regulation WP4357	1/23	0.763618	0.999512	0.702524	0.189462	YES1
DNA Mismatch Repair WP531	1/23	0.763618	0.999512	0.702524	0.189462	MSH2
Estrogen Signaling WP712	1/23	0.763618	0.999512	0.702524	0.189462	MAPK14
Pathways Affected In Adenoid Cystic Carcinoma WP3651	3/65	0.763893	0.999512	0.747485	0.201319	MAX;UHRF1;CMTR2
Clear Cell Renal Cell Carcinoma Pathways WP4018	4/85	0.766675	0.999512	0.76272	0.202649	LDHC;LDHA;PLOD2;PGM1
Glycolysis And Gluconeogenesis WP534	2/45	0.767318	0.999512	0.718649	0.190337	LDHC;LDHA
15Q25 Copy Number Variation WP5408	2/45	0.767318	0.999512	0.718649	0.190337	FSD2;ZSCAN2
Physico Chemical Features And Toxicity Associated Pathways WP3680	3/66	0.772893	0.999512	0.735581	0.189496	GPX1;PLCG1;RHOA
Histone Modifications WP2369	3/66	0.772893	0.999512	0.735581	0.189496	H3C8;H4C9;H4C3
AGE RAGE Pathway WP2324	3/66	0.772893	0.999512	0.735581	0.189496	PLA2G4A;MAPK14;RHOA
Endoplasmic Reticulum Stress Response In Coronavirus Infection WP4861	2/46	0.77786	0.999512	0.702278	0.176418	PPP1R16B;EIF2S1
Envelope Proteins And Potential Roles In EDMD Physiopathology WP4535	2/46	0.77786	0.999512	0.702278	0.176418	RHOA;TMPO
Translation Inhibitors In Chronically Activated PDGFRA Cells WP4566	2/46	0.77786	0.999512	0.702278	0.176418	RPS6KA5;MAPK14
NO cGMP PKG Mediated Neuroprotection WP4008	2/46	0.77786	0.999512	0.702278	0.176418	CAMK2A;TSPO
Regulation Of Apoptosis By Parathyroid Hormone Related Protein WP3872	1/24	0.777995	0.999512	0.671943	0.168681	BCL2L13
Kynurenine Pathway And Links To Cell Senescence WP5044	1/24	0.777995	0.999512	0.671943	0.168681	EIF2AK4
Follicle Stimulating Hormone FSH Signaling WP2035	1/24	0.777995	0.999512	0.671943	0.168681	MAPK14
Urea Cycle And Associated Pathways WP4595	1/24	0.777995	0.999512	0.671943	0.168681	ASS1
Triacylglyceride Synthesis WP325	1/24	0.777995	0.999512	0.671943	0.168681	LPL
MTHFR Deficiency WP4288	1/24	0.777995	0.999512	0.671943	0.168681	CHPT1
ATM Signaling In Development And Disease WP3878	2/47	0.787982	0.999512	0.686636	0.163612	MAPK14;RNF40
Orexin Receptor Pathway WP5094	4/88	0.789724	0.999512	0.735362	0.173598	OPRK1;GCG;MAPK14;GNAI1
Melanoma WP4685	3/68	0.79005	0.999512	0.712871	0.167995	GRM3;POLK;VCL
Relationship Between Inflammation COX 2 And EGFR WP4483	1/25	0.791498	0.999512	0.643911	0.150565	PTGER3
Macrophage Stimulating Protein MSP Signaling WP5353	5/108	0.792538	0.999512	0.749499	0.174269	LDHA;RPS6KA5;SMAD9;PLCG1;MAPK14
Thermogenesis WP4321	5/108	0.792538	0.999512	0.749499	0.174269	ACSL1;CREB3L2;ACSL4;GCG;MAPK14
Pluripotent Stem Cell Differentiation Pathway WP2848	2/48	0.797694	0.999512	0.671673	0.151818	WNT3A;FGF2
Exercise Induced Circadian Regulation WP410	2/48	0.797694	0.999512	0.671673	0.151818	BMAL1;QKI
Rett Syndrome WP4312	2/48	0.797694	0.999512	0.671673	0.151818	KDM5B;HAP1
Sterol Regulatory Element Binding Proteins SREBP Signaling WP1982	3/69	0.798216	0.999512	0.702033	0.158221	CDK8;SEC23A;LPL
Urotensin II Mediated Signaling WP5158	3/69	0.798216	0.999512	0.702033	0.158221	CAMK2A;MAPK14;RHOA
Nuclear Receptors Meta Pathway WP2882	16/314	0.800293	0.999512	0.827849	0.184426	CBR1;TXNRD3;SLC2A10;CAVIN2;MGST3;SLC6A14;MGST2;PRDX6;SLC2A6;KTN1;ALDH3A1;SLC6A8;ACOX1;AHRR;POLK;IP6K3
Allograft Rejection WP2328	4/90	0.804052	0.999512	0.718184	0.15663	LRRK2;CXCR5;C8A;HLA-G
Warburg Effect Mod By Deubiquitinating Enzymes And Substrates WP5216	1/26	0.80418	0.999512	0.618122	0.134709	LDHA
Glucocorticoid Receptor Pathway WP2880	3/70	0.806115	0.999512	0.691518	0.149042	MGAM;CAVIN2;KTN1
RANKL RANK Signaling WP2018	2/50	0.815942	0.999512	0.643618	0.130919	PLCG1;MAPK14
Canonical And Non Canonical Notch Signaling WP3845	1/27	0.816092	0.999512	0.594316	0.120782	JAG1
1Q21 1 Copy Number Variation Syndrome WP4905	1/27	0.816092	0.999512	0.594316	0.120782	TJP2
7 Oxo C And 7 Beta HC Pathways WP5064	1/27	0.816092	0.999512	0.594316	0.120782	ACOT8
B Cell Receptor Signaling WP23	4/92	0.817577	0.999512	0.701787	0.141347	MAX;CAMK2A;PLCG1;MAPK14
lncRNA In Canonical Wnt Signaling And Colorectal Cancer WP4258	4/93	0.824046	0.999512	0.693864	0.134283	CDK8;WNT5B;CTBP2;WNT3A
Synaptic Vesicle Pathway WP2267	2/51	0.824502	0.999512	0.630449	0.121661	SYN2;SLC25A4
Interactions Of Natural Killer Cells In Pancreatic Cancer WP5092	1/28	0.827279	0.999512	0.572274	0.108511	FCGR3A
Nanoparticle Mediated Activation Of Receptor Signaling WP2643	1/28	0.827279	0.999512	0.572274	0.108511	MAPK14
T Cell Receptor And Co Stimulatory Signaling WP2583	1/28	0.827279	0.999512	0.572274	0.108511	PLCG1
Angiotensin II Receptor Type 1 Pathway WP5036	1/28	0.827279	0.999512	0.572274	0.108511	MAS1
IL19 Signaling WP5422	1/28	0.827279	0.999512	0.572274	0.108511	MAPK14
Chromosomal And Microsatellite Instability In Colorectal Cancer WP4216	3/73	0.828261	0.999512	0.661775	0.124696	MSH2;POLK;RHOA
Netrin UNC5B Signaling WP4747	2/52	0.832703	0.999512	0.617807	0.113107	MAPK14;RHOA
Arrhythmogenic Right Ventricular Cardiomyopathy WP2118	3/74	0.835145	0.999512	0.652419	0.117533	CACNB2;CACNB3;ITGA10
Cytosolic DNA Sensing Pathway WP4655	3/74	0.835145	0.999512	0.652419	0.117533	CCL4L2;POLR3H;ATG5
Small Cell Lung Cancer WP4658	4/95	0.836415	0.999512	0.678542	0.121209	TRAF4;MAX;POLK;CKS1B
Selective Expression Of Chemokine Receptors T Cell Polarization WP4494	1/29	0.837786	0.999512	0.551806	0.0976654	CCR3
Disorders Of Bile Acid Synthesis And Biliary Transport WP5176	1/29	0.837786	0.999512	0.551806	0.0976654	SLC51B
Lipid Metabolism Pathway WP3965	1/29	0.837786	0.999512	0.551806	0.0976654	ABHD5
PDGFR Beta Pathway WP3972	1/29	0.837786	0.999512	0.551806	0.0976654	PLCG1
Kleefstra Syndrome WP5351	1/29	0.837786	0.999512	0.551806	0.0976654	ASXL1
Kit Receptor Signaling WP304	2/53	0.840556	0.999512	0.605661	0.105199	PLCG1;MAPK14
2Q37 Copy Number Variation Syndrome WP5224	6/136	0.840898	0.999512	0.712159	0.123406	ING5;CALCRL;MTERF4;TWIST2;COPS9;RBM44
Primary Ovarian Insufficiency WP5461	6/136	0.840898	0.999512	0.712159	0.123406	DCAF17;XRCC2;PMM2;TWNK;POLR3H;RCBTB1
Matrix Metalloproteinases WP129	1/30	0.847655	0.999512	0.53275	0.0880537	MMP16
8P23 1 Copy Number Variation Syndrome WP5346	2/54	0.848073	0.999512	0.593982	0.0978816	HEPACAM2;HSPD1
Interferon Type I Signaling WP585	2/54	0.848073	0.999512	0.593982	0.0978816	RPS6KA5;MAPK14
Notch Signaling WP61	2/54	0.848073	0.999512	0.593982	0.0978816	JAG1;HEY2
Non Genomic Actions Of 1 25 Dihydroxyvitamin D3 WP4341	3/76	0.848202	0.999512	0.634477	0.104458	CAMK2A;SP3;MAPK14
Hippo Merlin Signaling Dysregulation WP4541	5/120	0.860814	0.999512	0.670859	0.100546	ITGA10;CDH16;MET;FGFR2;CDH19
Cell Cycle WP179	5/120	0.860814	0.999512	0.670859	0.100546	ORC5;ANAPC13;ORC4;CDKN2C;ANAPC10
PI3K AKT mTOR Signaling And Therapeutic In Prostate Cancer WP3844	1/32	0.865629	0.999512	0.498326	0.0719078	RB1CC1
Hair Follicle Development Organogenesis Part 2 Of 3 WP2839	1/32	0.865629	0.999512	0.498326	0.0719078	FGFR2
Development And Heterogeneity Of The ILC Family WP3893	1/32	0.865629	0.999512	0.498326	0.0719078	NFIL3
2Q11 2 Copy Number Variation Syndrome WP5221	1/32	0.865629	0.999512	0.498326	0.0719078	RHOA
Prion Disease Pathway WP3995	1/32	0.865629	0.999512	0.498326	0.0719078	HSP90B1
Proximal Tubule Transport WP4917	2/57	0.868726	0.999512	0.561493	0.0790172	SLC13A3;FXYD2
Metapathway Biotransformation Phase I And II WP702	8/183	0.873247	0.999512	0.704841	0.095532	NAA50;CYP2W1;GSTO2;MGST3;CYP4F3;MGST2;SULT4A1;HS6ST3
Host Pathogen Interaction Of Human CoV Interferon Induction WP4880	1/33	0.873805	0.999512	0.482728	0.0651189	MAPK14
Type I Collagen Synthesis Osteogenesis Imperfecta WP4786	1/33	0.873805	0.999512	0.482728	0.0651189	PLOD2
FBXL10 Enhancement Of MAP ERK Signaling In DLBCL WP4553	1/33	0.873805	0.999512	0.482728	0.0651189	H3C8
Cardiomyocyte Signaling Converging On Titin WP5344	1/33	0.873805	0.999512	0.482728	0.0651189	CAMK2A
MAPK Cascade WP422	1/33	0.873805	0.999512	0.482728	0.0651189	MAPK14
1P36 Copy Number Variation Syndrome WP5345	4/102	0.8741	0.999512	0.629839	0.0847511	GDE1;ATAD3B;UBE2J2;SLC35E2B
Complement And Coagulation Cascades WP558	2/58	0.875016	0.999512	0.551437	0.0736238	F2;F5
Mesodermal Commitment Pathway WP2857	6/145	0.880852	0.999512	0.665726	0.0844578	CTBP2;WNT3A;ZNF281;SCHIP1;CEP250;C9ORF72
Dengue 2 Interactions With Complement And Coagulation Cascades WP3896	2/59	0.881027	0.999512	0.541734	0.0686196	F2;F5
Markers Of Kidney Cell Lineage WP5236	2/59	0.881027	0.999512	0.541734	0.0686196	EGLN1;JAG1
Cohesin Complex Cornelia De Lange Syndrome WP5117	1/34	0.881484	0.999512	0.468074	0.0590469	PPP2R5E
Development Of Ureteric Derived Collecting System WP5053	2/60	0.88677	0.999512	0.532365	0.0639741	GDF11;FGFR2
Polycystic Kidney Disease Pathway WP2571	3/84	0.891812	0.999512	0.571568	0.0654448	WNT5B;WNT3A;GNAI1
Modulators Of TCR Signaling And T Cell Activation WP5072	2/61	0.892255	0.999512	0.523314	0.0596597	RNF7;PLCG1
Host Pathogen Interaction Of Human Coronaviruses MAPK Signaling WP4877	1/36	0.895469	0.999512	0.44128	0.0487205	MAPK14
Factors And Pathways Affecting IGF1 Akt Signaling WP3850	1/36	0.895469	0.999512	0.44128	0.0487205	FBXO32
ncRNAs In Wnt Signaling In Hepatocellular Carcinoma WP4336	3/85	0.89639	0.999512	0.564568	0.0617524	WNT5B;CTBP2;WNT3A
T Cell Antigen Receptor TCR Pathway During Staph A. Infection WP3863	2/62	0.897492	0.999512	0.514564	0.0556509	CHP1;PLCG1
TYROBP Causal Network In Microglia WP3945	2/62	0.897492	0.999512	0.514564	0.0556509	GPX1;CREB3L2
Ebola Virus Infection In Host WP4217	5/129	0.898705	0.999512	0.621868	0.0664155	CAV2;RHOC;HLA-G;EIF2S1;RHOA
Effect Of Progerin On Genes Involved In Progeria WP4320	1/37	0.901831	0.999512	0.429	0.0443277	H3C8
miRNA Role In Immune Response In Sepsis WP4329	1/37	0.901831	0.999512	0.429	0.0443277	MAPK14
Endochondral Ossification With Skeletal Dysplasias WP4808	2/63	0.902491	0.999512	0.506102	0.0519246	CTSV;FGF2
Endochondral Ossification WP474	2/63	0.902491	0.999512	0.506102	0.0519246	CTSV;FGF2
Lung Fibrosis WP3624	2/63	0.902491	0.999512	0.506102	0.0519246	FGF2;CCR3
DNA Damage Response Only ATM Dependent WP710	4/109	0.904039	0.999512	0.587629	0.0592815	WNT5B;WNT3A;PPP2R5E;RHOA
CAMKK2 Pathway WP4874	4/110	0.907758	0.999512	0.582054	0.0563295	FIS1;NEDD4L;S100A8;GALNT9
TNF Related Weak Inducer Of Apoptosis TWEAK Signaling WP2036	1/38	0.907806	0.999512	0.417383	0.0403713	MAPK14
Nuclear Receptors WP170	1/38	0.907806	0.999512	0.417383	0.0403713	ESRRA
Cell Lineage Map For Neuronal Differentiation WP5417	5/132	0.909176	0.999512	0.60708	0.0578039	RIMS2;RBFOX3;MOG;TWIST2;TWIST1
Apoptosis Modulation And Signaling WP1772	3/89	0.913007	0.999512	0.538194	0.0489821	CRADD;PTRH2;BNIP3
Immune Infiltration In Pancreatic Cancer WP5285	1/39	0.913417	0.999512	0.406377	0.0368026	LGALS1
SARS CoV 2 Innate Immunity Evasion And Cell Immune Response WP5039	2/66	0.916154	0.999512	0.482301	0.0422357	AP1G1;CXCR2
Catabolism Of Skeletal Muscle In Cachexia WP5474	1/40	0.918687	0.999512	0.395936	0.0335792	FBXO32
Bladder Cancer WP2828	1/40	0.918687	0.999512	0.395936	0.0335792	RPS6KA5
Focal Adhesion WP306	8/199	0.921915	0.999512	0.645241	0.0524594	RAP1B;CAV2;ITGA10;CAPN2;MET;RHOA;MYLK3;VCL
Glycosaminoglycan Synthesis In Fibroblasts WP5395	1/41	0.923637	0.999512	0.386017	0.0306638	HS6ST3
RAC1 PAK1 P38 MMP2 Pathway WP3303	2/68	0.92424	0.999512	0.467636	0.0368419	MSH2;MAPK14
Ectoderm Differentiation WP2858	5/138	0.927308	0.999512	0.579507	0.0437354	SCHIP1;FGFR2;PGM1;KRT6A;WDR44
miRNA Regulation Of DNA Damage Response WP1530	2/69	0.928002	0.999512	0.460632	0.034419	FANCD2;RAD1
DNA Damage Response WP707	2/69	0.928002	0.999512	0.460632	0.034419	FANCD2;RAD1
Endoderm Differentiation WP2853	5/140	0.932593	0.999512	0.57086	0.039838	CTBP2;ZNF281;CTR9;CEP250;CDC73
Integrated Cancer Pathway WP1971	1/44	0.936751	0.999512	0.359028	0.0234581	MSH2
Heart Development WP1591	1/44	0.936751	0.999512	0.359028	0.0234581	HEY2
IL11 Signaling WP2332	1/44	0.936751	0.999512	0.359028	0.0234581	YES1
Non Small Cell Lung Cancer WP4255	2/72	0.938256	0.999512	0.44082	0.0280946	POLK;PLCG1
Vitamin D Receptor Pathway WP2877	7/186	0.939508	0.999512	0.602325	0.0375843	SLC34A2;CDKN2C;KRT38;CCNC;ALPI;S100A9;S100A8
Chronic Hyperglycemia Impairment Of Neuron Function WP5283	1/46	0.944218	0.999512	0.343035	0.0196895	MMP16
Phosphatidyl Inositol Phosphate Pathway WP5411	1/46	0.944218	0.999512	0.343035	0.0196895	PLCG1
T Cell Modulation In Pancreatic Cancer WP5078	1/46	0.944218	0.999512	0.343035	0.0196895	LGALS1
17Q12 Copy Number Variation Syndrome WP5287	3/100	0.946953	0.999512	0.476881	0.0259928	CCL4L2;LIG3;RFFL
T Cell Receptor Signaling WP69	2/75	0.947113	0.999512	0.422636	0.0229646	PLCG1;MAPK14
Mechanoreg And Pathology Of YAP TAZ Hippo And Non Hippo Mechs WP4534	1/47	0.947615	0.999512	0.33556	0.0180556	LIMD1
Wnt Signaling WP363	1/47	0.947615	0.999512	0.33556	0.0180556	RHOA
mRNA Processing WP411	4/125	0.95002	0.999512	0.509489	0.0261225	PRPF18;SNRPG;HNRNPH2;TXNL4A
IL26 Signaling WP5347	1/48	0.950804	0.999512	0.328403	0.0165669	MAPK14
Hepatitis C And Hepatocellular Carcinoma WP3646	1/49	0.9538	0.999512	0.321544	0.0152094	MAPK14
Phosphoinositides Metabolism WP4971	1/49	0.9538	0.999512	0.321544	0.0152094	PLCG1
IL3 Signaling WP286	1/49	0.9538	0.999512	0.321544	0.0152094	CCR3
Regulatory Circuits Of STAT3 Signaling WP4538	2/78	0.954751	0.999512	0.405888	0.0187946	AGTR2;MAPK14
Photodynamic Therapy Induced AP 1 Survival Signaling WP3611	1/50	0.956614	0.999512	0.314965	0.0139705	MAPK14
Osteoarthritic Chondrocyte Hypertrophy WP5373	1/50	0.956614	0.999512	0.314965	0.0139705	FGFR2
IL4 Signaling WP395	1/50	0.956614	0.999512	0.314965	0.0139705	MAPK14
Oxysterols Derived From Cholesterol WP4545	1/51	0.959256	0.999512	0.308649	0.0128391	ACOT8
Breast Cancer Pathway WP4262	5/154	0.960909	0.999512	0.516834	0.0206092	WNT5B;WNT3A;HEY2;POLK;FGF2
NRP1 Triggered Signaling In Pancreatic Cancer WP5144	1/53	0.964068	0.999512	0.296746	0.0108591	MET
Androgen Receptor Network In Prostate Cancer WP2263	3/109	0.965077	0.999512	0.436181	0.015505	RAP1B;MSH2;MAPK14
TGF Beta Receptor Signaling WP560	1/54	0.966256	0.999512	0.291132	0.00999349	SMAD9
Apoptosis WP254	2/84	0.96698	0.999512	0.376068	0.0126276	BNIP3L;CRADD
DNA IR Double Strand Breaks And Cellular Response Via ATM WP3959	1/55	0.968311	0.999512	0.285725	0.00920078	FANCD2
Pathogenic Escherichia Coli Infection WP2272	1/55	0.968311	0.999512	0.285725	0.00920078	RHOA
Hematopoietic SC Differentiation WP2849	1/55	0.968311	0.999512	0.285725	0.00920078	SEC14L2
Acute Viral Myocarditis WP4298	2/85	0.96868	0.999512	0.371517	0.0118218	CAAP1;CCR3
Oncostatin M Signaling WP2374	1/56	0.970242	0.999512	0.280515	0.00847438	MAPK14
Androgen Receptor Signaling WP138	2/87	0.971833	0.999512	0.362737	0.010364	DSTN;RHOA
Neurogenesis Regulation In The Olfactory Epithelium WP5265	1/57	0.972054	0.999512	0.275491	0.00780837	JAG1
Pleural Mesothelioma WP5087	18/437	0.972156	0.999512	0.659142	0.0186132	CTBP2;WNT5B;MAX;UHRF1;WNT3A;LIMD1;MAPK14;FGF2;ASXL1;EFNA3;FABP4;RPS6KA5;RB1CC1;CDH16;MET;FGF12;FGFR2;CDH19
TGF Beta Receptor Signaling In Skeletal Dysplasias WP4816	1/58	0.973757	0.999512	0.270644	0.0071974	SMAD9
Pancreatic Adenocarcinoma Pathway WP4263	2/89	0.974677	0.999512	0.35436	0.00908888	POLK;RHOA
TNF Alpha Signaling WP231	2/89	0.974677	0.999512	0.35436	0.00908888	SMPD2;RFFL
Chemokine Signaling WP3929	5/165	0.974984	0.999512	0.481018	0.0121864	RAP1B;CXCR2;CXCR5;CCR3;GNAI1
ErbB Signaling WP673	2/90	0.975994	0.999512	0.350315	0.00851237	NRG3;CAMK2A
2Q13 Copy Number Variation Syndrome WP5222	1/60	0.976857	0.999512	0.261441	0.00612163	IL36A
Spinal Cord Injury WP2431	3/119	0.978315	0.999512	0.398365	0.00873373	RHOC;LILRB3;RHOA
Focal Adhesion PI3K Akt mTOR Signaling WP3932	11/303	0.979066	0.999512	0.578616	0.0122412	RAB2A;RAB10;EFNA3;PPP2R5E;ITGA10;CREB3L2;FGF2;FGF12;MET;FGFR2;HSP90B1
Thyroid Hormones And Peripheral Downstream Signaling Effects WP4746	2/93	0.979557	0.999512	0.338712	0.00699601	TRH;MAPK14
DYRK1A Involvement Regarding Cell Prolif In Brain Development WP5180	1/62	0.979591	0.999512	0.252843	0.00521358	FGF2
Complement System WP2806	2/95	0.981642	0.999512	0.331392	0.00614028	FCGR3A;C8A
Circadian Rhythm Genes WP3594	6/201	0.984959	0.999512	0.473118	0.00717032	NFIL3;PROK2;RORB;DRD2;BMAL1;NPAS2
Myometrial Relaxation And Contraction Pathways WP289	4/156	0.987218	0.999512	0.404907	0.0052087	PKIB;CACNB3;CAMK2A;PLCG1
Network Map Of SARS CoV 2 Signaling WP5115	8/254	0.988417	0.999512	0.499498	0.00581931	TOMM70;ERLEC1;CXCR2;HBB;PMPCB;GGH;C8A;FGF2
Angiopoietin Like Protein 8 Regulatory Pathway WP3915	3/132	0.988516	0.999512	0.357971	0.00413473	RPS6KA5;LPL;MAPK14
7Q11 23 Copy Number Variation Syndrome WP4932	2/104	0.988731	0.999512	0.302006	0.00342248	OGDH;FKBP6
Cytokine Cytokine Receptor Interaction WP5473	8/255	0.988845	0.999512	0.497449	0.00558019	GDF11;IL36A;ACVR1C;CCL4L2;CXCR2;IL31RA;CXCR5;CCR3
Head And Neck Squamous Cell Carcinoma WP4674	1/73	0.989781	0.999512	0.214088	0.00219909	FGFR2
Complement System In Neuronal Development And Plasticity WP5090	2/106	0.989898	0.999512	0.296167	0.00300706	COLEC10;C8A
Extrafollicular And Follicular B Cell Activation By SARS CoV 2 WP5218	1/74	0.990404	0.999512	0.211144	0.00203601	CXCR5
16P11 2 Proximal Deletion Syndrome WP4949	1/74	0.990404	0.999512	0.211144	0.00203601	CCT5
Prolactin Signaling WP2037	1/74	0.990404	0.999512	0.211144	0.00203601	MAPK14
Neuroinflammation And Glutamatergic Signaling WP5083	3/140	0.992295	0.999512	0.336923	0.00260602	CAMK2A;SLC38A3;FGF2
Hair Follicle Development Cytodifferentiation Stage 3 Of 3 WP2840	1/87	0.995764	0.999512	0.179102	0.000760277	KLK14
Retinoblastoma Gene In Cancer WP2446	1/87	0.995764	0.999512	0.179102	0.000760277	DHFR
T Cell Activation SARS CoV 2 WP5098	1/88	0.996022	0.999512	0.177034	0.000705583	PLCG1
Overview Of Proinflammatory And Profibrotic Mediators WP5095	2/129	0.997177	0.999512	0.242231	0.000684845	IL36A;CCL4L2
PI3K Akt Signaling WP4172	10/338	0.997234	0.999512	0.466982	0.0012933	EFNA3;PPP2R5E;ITGA10;CREB3L2;PKN2;FGF2;FGF12;MET;FGFR2;HSP90B1
Toll Like Receptor Signaling WP75	1/95	0.997439	0.999512	0.163789	0.000419958	MAPK14
Measles Virus Infection WP4630	2/136	0.998095	0.999512	0.229491	0.000437559	EIF2AK4;EIF2S1
Hepatitis B Infection WP4666	2/151	0.999185	0.999512	0.206222	0.000168038	CREB3L2;MAPK14
Insulin Signaling WP481	2/160	0.999512	0.999512	0.194382	9.48393e-05	RPS6KA5;MAPK14

## Sheet: BioPlanet
Term	Overlap	P-value	AdjustedpP-value	Odds Ratio	Combined Score	Genes
Tricarboxylic acid (TCA) cycle and respiratory electron transport	23/117	4.90673e-07	0.000495089	3.83669	55.7374	PDHX;NDUFA8;COX7B;NDUFB8;NDUFB6;NDUFB5;NDUFB1;ETFA;UQCR11;COX6A1;COX6C;COX5A;UQCRH;LDHA;SUCLA2;UQCRQ;NNT;OGDH;UQCRFS1;SUCLG1;NDUFS1;NDUFV3;NDUFV2
Respiratory electron transport, ATP biosynthesis by chemiosmotic coupling, and heat production by uncoupling proteins	17/81	5.91096e-06	0.00298208	4.15089	49.9713	NDUFA8;COX7B;NDUFB8;NDUFB6;NDUFB5;NDUFB1;ETFA;UQCR11;COX6A1;COX6C;COX5A;UQCRH;UQCRQ;UQCRFS1;NDUFS1;NDUFV3;NDUFV2
Parkinson's disease	22/131	1.28076e-05	0.00430761	3.15965	35.595	NDUFA8;COX7B;NDUFB8;GPR37;NDUFB6;NDUFB5;LRRK2;NDUFB1;COX7A2;UQCR11;COX6A1;UBE2J2;COX6C;COX5A;UQCRH;UQCRQ;UQCRFS1;VDAC1;NDUFS1;NDUFV3;NDUFV2;SLC25A4
Electron transport chain	18/105	5.79798e-05	0.0146254	3.23187	31.5283	NDUFA8;COX7B;NDUFB8;NDUFB6;NDUFB5;NDUFB1;COX7A2;UQCR11;COX6A1;COX6C;COX5A;UQCRH;UQCRQ;UQCRFS1;NDUFS1;NDUFV3;NDUFV2;SLC25A4
Cardiac muscle contraction	15/80	8.2437e-05	0.0166358	3.6	33.8525	COX7B;TNNC1;ATP1A3;ATP1B3;COX7A2;UQCR11;COX6A1;COX6C;COX5A;UQCRH;CACNB2;CACNB3;UQCRQ;FXYD2;UQCRFS1
Oxidative phosphorylation	19/136	0.000575045	0.0926097	2.53475	18.9119	NDUFA8;COX7B;NDUFB8;ATP6V1G2;NDUFB6;NDUFB5;NDUFB1;COX7A2;UQCR11;COX6A1;COX6C;COX5A;UQCRH;PPA2;UQCRQ;UQCRFS1;NDUFS1;NDUFV3;NDUFV2
Propanoate metabolism	8/33	0.000642485	0.0926097	4.97365	36.5572	LDHC;ACSS3;LDHA;SUCLA2;ALDH1B1;SUCLG1;MLYCD;ACAT1
S1P/S1P4 pathway	5/14	0.00103473	0.130505	8.62075	59.2558	GNAZ;GNA12;PLCG1;GNAI1;RHOA
Alzheimer's disease	21/169	0.00143261	0.160612	2.21477	14.5029	NDUFA8;COX7B;NDUFB8;NDUFB6;NDUFB5;LPL;NDUFB1;COX7A2;UQCR11;COX6A1;COX6C;COX5A;UQCRH;PPP3CB;UQCRQ;CAPN2;CHP1;UQCRFS1;NDUFS1;NDUFV3;NDUFV2
Huntington's disease	22/184	0.00184487	0.186148	2.11991	13.3455	NDUFA8;COX7B;NDUFB8;GPX1;NDUFB6;NDUFB5;NDUFB1;COX7A2;UQCR11;COX6A1;COX6C;COX5A;UQCRH;UQCRQ;CREB3L2;UQCRFS1;VDAC1;NDUFS1;NDUFV3;HAP1;NDUFV2;SLC25A4
Ion channel transport	10/61	0.00349536	0.32062	3.04841	17.2428	GABRB3;GABRB2;GABRA4;FXYD2;ATP1A3;ATP1B3;HTR3A;ATP2C1;ATP9B;GABRG2
GABA (A) receptor activation	4/12	0.00452416	0.380406	7.75268	41.8515	GABRB3;GABRB2;GABRA4;GABRG2
Biosynthesis of the N-glycan precursor (dolichol lipid-linked oligosaccharide, LLO) and transfer to a nascent protein	6/30	0.00837303	0.649876	3.87945	18.5544	DPM1;PMM1;PMM2;RFT1;ALG10;ALG10B
Signaling events mediated by PRL	5/23	0.0110242	0.794526	4.30831	19.4204	PTP4A1;PTP4A3;RABGGTB;RHOC;RHOA
Protein metabolism	39/442	0.0125458	0.835167	1.51267	6.62304	RPL4;SEC23A;PGAP1;RPL9;RPL7;HSPD1;SEC61G;KIF13A;PMPCB;SEC61B;ST3GAL1;RPS13;CCT5;GALNT9;GALNT5;PMM1;VBP1;PMM2;SSR3;PAM16;TIMM23;F2;ALG10;EIF2S2;EIF2S1;DPM1;DAD1;RPL37A;EIF3J;RFT1;PIGM;VDAC1;PIGL;FBXL5;ALG10B;SLC25A4;EIF3A;RPL26L1;TOMM6
Endogenous Toll-like receptor signaling	5/24	0.0132435	0.835167	4.08134	17.6487	IRAK2;S100A9;RHOA;S100A8;HSPD1
Ligand-gated ion channel transport	5/25	0.0157454	0.906205	3.87707	16.0945	GABRB3;GABRB2;GABRA4;HTR3A;GABRG2
Acyl chain remodelling of phosphatidylglycerol	4/17	0.0170643	0.906205	4.76961	19.416	PLA2G12A;PLA2G3;PLA2G4A;CRLS1
Platelet sensitization by LDL	4/17	0.0170643	0.906205	4.76961	19.416	PPP2R5E;PLA2G4A;MAPK14;APOB
Alpha-linolenic acid metabolism	4/19	0.02524	0.999853	4.13322	15.2075	PLA2G12A;ACOX1;PLA2G3;PLA2G4A
Alpha-linolenic (omega3) and linoleic (omega6) acid metabolism	3/11	0.0255464	0.999853	5.80972	21.3057	ACOT8;ACOX1;ACSL1
Folate biosynthesis	3/11	0.0255464	0.999853	5.80972	21.3057	DHFR;GGH;ALPI
eIF2 regulation	3/11	0.0255464	0.999853	5.80972	21.3057	EIF2AK4;EIF2S2;EIF2S1
S1P/S1P3 pathway	5/29	0.0288301	0.999853	3.2302	11.4554	GNAZ;GNA12;S1PR3;GNAI1;RHOA
Tricarboxylic acid (TCA) cycle	6/39	0.028999	0.999853	2.82006	9.98441	PDHX;SUCLA2;NNT;OGDH;ACO1;SUCLG1
Peroxisomal lipid metabolism	4/20	0.0300729	0.999853	3.87469	13.5774	ACOT8;PHYH;ACOX1;FAR1
Metabolism	116/1615	0.0315909	0.999853	1.21718	4.2052	PGAP1;PANK1;CCNC;COX6A1;TM7SF2;HS6ST3;PPAT;MLYCD;PDHX;ACOT8;PHYH;ATP6V1G2;ACSL1;ACSL4;ALG10;MED7;DPM1;CACNB2;ALDH3A1;CACNB3;FAR1;SUCLG1;ALG10B;MAOB;MGST3;PLA2G3;MGST2;LPL;ABHD5;NPAS2;UQCRH;ACAT1;PGS1;FUT6;LDHC;LDHA;NPC1L1;RDH10;MED31;NDUFV3;PLCG1;APOB;NDUFV2;ST3GAL1;DECR1;ESRRA;MGAM;PMM1;UROS;CYP4F3;PMM2;AZIN2;PRDX6;CRLS1;DHFR;GGCT;CDK8;UQCRQ;OGDH;ACO1;ALPI;COX7B;HIBADH;MTMR14;CYP4A22;AMD1;MED19;…
Cap-dependent translation initiation	9/73	0.0322308	0.999853	2.18295	7.49808	RPL4;RPL37A;EIF3J;EIF2S2;RPL9;EIF2S1;EIF3A;RPL26L1;RPL7
Pyruvate metabolism and citric acid (TCA) cycle	6/40	0.0324241	0.999853	2.73697	9.38467	PDHX;LDHA;SUCLA2;NNT;OGDH;SUCLG1
Rab GTPases mark targets in the endocytotic machinery	3/12	0.0325538	0.999853	5.16392	17.6857	RAB2A;RAB1A;RAB11A
GDP-mannose biosynthesis	2/5	0.0326033	0.999853	10.3226	35.3378	PMM1;PMM2
Signaling events mediated by focal adhesion kinase	8/62	0.03329	0.999853	2.29906	7.82254	RAP1B;KLF8;YES1;CAPN2;PLCG1;MAPK8IP3;RHOA;VCL
S1P/S1P1 pathway	4/21	0.0354141	0.999853	3.64657	12.1819	GNAZ;PLCG1;GNAI1;RHOA
Bioactive peptide-induced signaling pathway	6/41	0.0361015	0.999853	2.65863	8.83044	CAMK2A;PLCG1;AGTR2;F2;MAPK14;GNAI1
Mitochondrial protein import	7/52	0.0368209	0.999853	2.41317	7.96754	PAM16;PMPCB;TIMM23;VDAC1;SLC25A4;HSPD1;TOMM6
Fatty acid metabolism	6/42	0.0400359	0.999853	2.58464	8.31733	ALDH1B1;ACSL1;ACOX1;CYP4A22;ACSL4;ACAT1
Netrin-mediated signaling events	5/32	0.0421396	0.999853	2.87083	9.09125	TRIO;YES1;CAMK2A;PLCG1;RHOA
Transcriptional regulation of white adipocyte differentiation	9/77	0.0433162	0.999853	2.0541	6.4483	CDK8;FABP4;MED31;MED19;LPL;CCNC;CD36;MED16;MED7
ADP signalling through P2Y purinoceptor 1	2/6	0.0469587	0.999853	7.74155	23.6774	PLA2G4A;MAPK14
Assembly of the ORC complex at the origin of replication	2/6	0.0469587	0.999853	7.74155	23.6774	ORC5;ORC4
Beta-oxidation of very long chain fatty acids	2/6	0.0469587	0.999853	7.74155	23.6774	ACOT8;ACOX1
Low-density lipoprotein (LDL) pathway during atherogenesis	2/6	0.0469587	0.999853	7.74155	23.6774	LPL;ACAT1
Proximal tubule bicarbonate reclamation	4/23	0.0476349	0.999853	3.26238	9.93129	FXYD2;ATP1A3;ATP1B3;SLC38A3
Polyamine metabolism	3/14	0.049222	0.999853	4.22457	12.7219	SMOX;AMD1;AZIN2
Ephrin receptor A forward pathway	5/34	0.0527646	0.999853	2.67256	7.86243	EFNA3;YES1;PLCG1;EPHA1;RHOA
Fatty acid beta oxidation	5/34	0.0527646	0.999853	2.67256	7.86243	ACSL1;LPL;ACSL4;ACAT1;DECR1
PPAR signaling pathway	8/69	0.0570846	0.999853	2.03447	5.82514	FABP4;FABP5;ACSL1;ACOX1;CYP4A22;LPL;ACSL4;CD36
Arf6 vesicle-mediated transport	3/15	0.0588322	0.999853	3.87232	10.9705	KALRN;RAB11A;RHOA
Arachidonic acid metabolism	7/58	0.0607656	0.999853	2.12859	5.9616	CBR1;PLA2G12A;GPX1;CYP4A22;CYP4F3;PLA2G4A;PLA2G3
Axon guidance	27/325	0.0617313	0.999853	1.40993	3.9266	TRIO;SEMA3C;ARHGAP39;GNAI1;CACNA1H;PPP3CB;RPS6KA5;CFL2;CHP1;PLCG1;SCN3B;EPHB1;TRPC6;RANBP9;UNC5D;RGMB;RHOC;RHOD;RHOA;GFRA4;CACNB2;MYL6;CACNB3;EFNA3;PLXNB3;EPHA1;MET
Glutathione conjugation	4/25	0.0618976	0.999853	2.95136	8.21149	GGCT;GSTO2;MGST3;MGST2
Cation-coupled chloride cotransporters	2/7	0.0631401	0.999853	6.19291	17.1073	SLC12A5;SLC12A1
Ion transport by P-type ATPases	5/36	0.0648078	0.999853	2.49987	6.84046	FXYD2;ATP1A3;ATP1B3;ATP2C1;ATP9B
N-glycan precursor substrate biosynthesis	3/16	0.0692485	0.999853	3.57426	9.54346	DPM1;PMM1;PMM2
Acyl chain remodelling of phosphatidylcholine	4/26	0.0697802	0.999853	2.81706	7.50014	PLA2G12A;PNPLA8;PLA2G3;PLA2G4A
Physiological and pathological hypertrophy of the heart	4/26	0.0697802	0.999853	2.81706	7.50014	PPP3CB;MYEF2;MAPK14;RHOA
MicroRNAs in cardiomyocyte hypertrophy	9/85	0.0725146	0.999853	1.8371	4.82048	PPP3CB;MYEF2;WNT3A;MAPK14;FGF2;HDAC9;MYLK3;RHOA;FGFR2
Muscle contraction	6/49	0.0750182	0.999853	2.16308	5.60243	MYBPC1;MYL6;TNNC1;MYH8;MYL6B;VCL
Translation	14/151	0.0756602	0.999853	1.58671	4.09609	RPL4;SSR3;EIF2S2;RPL9;MRPL13;EIF2S1;RPL7;SEC61G;RPL37A;EIF3J;SEC61B;RPS13;EIF3A;RPL26L1
Lipid metabolism regulation by peroxisome proliferator-activated receptor alpha (PPAR-alpha)	11/112	0.0781162	0.999853	1.69011	4.30903	ESRRA;CDK8;ACSL1;ACOX1;MED31;MED19;CCNC;CD36;MED16;NPAS2;MED7
Eukaryotic protein translation	3/17	0.0804308	0.999853	3.31878	8.3645	EIF2S2;EIF2S1;EIF3A
Phenylalanine metabolism	3/17	0.0804308	0.999853	3.31878	8.3645	ALDH3A1;MAOB;PRDX6
Protein processing in the endoplasmic reticulum	15/166	0.0804825	0.999853	1.54255	3.88679	SEC23A;SSR3;DERL1;DERL2;EIF2AK4;UBE2J2;EIF2S1;RAD23B;HSP90B1;ERLEC1;HSPH1;DAD1;SEC61G;CAPN2;SEC61B
BRCA1-dependent ubiquitin ligase activity	2/8	0.080873	0.999853	5.16048	12.978	FANCD2;FANCE
RNA polymerase II C-terminal domain phosphorylation and interaction with capping enzyme	2/8	0.080873	0.999853	5.16048	12.978	ERCC2;GTF2H2
Recycling of eIF2-GDP complex	2/8	0.080873	0.999853	5.16048	12.978	EIF2S2;EIF2S1
Sema4D-mediated inhibition of cell attachment and migration	2/8	0.080873	0.999853	5.16048	12.978	MET;RHOA
Support of platelet aggregation by Eph kinases and ephrins	2/8	0.080873	0.999853	5.16048	12.978	RAP1B;EPHB1
TSP1-induced apoptosis in microvascular endothelial cell	2/8	0.080873	0.999853	5.16048	12.978	CD36;MAPK14
Vitamin C (ascorbate) metabolism	2/8	0.080873	0.999853	5.16048	12.978	CYB5A;GSTO2
Pancreatic secretion	10/101	0.0864456	0.999853	1.7048	4.17376	RAP1B;PLA2G12A;FXYD2;PLA2G3;PLA2G4A;ATP1A3;ATP1B3;PRSS2;RHOA;RAB11A
Metabolism of vitamins and cofactors	6/51	0.0874282	0.999853	2.06672	5.03647	THTPA;DHFR;CYB5A;GSTO2;PANK1;PPCDC
Endothelins	7/64	0.0924444	0.999853	1.90392	4.5335	GNAZ;TRPC6;GNA12;PLA2G4A;MAPK14;RHOA;GNAI1
Pyruvate metabolism	6/52	0.0940292	0.999853	2.02169	4.77957	LDHC;PDHX;LDHA;ALDH1B1;ME3;ACAT1
Histidine metabolism	4/29	0.0963032	0.999853	2.47861	5.80058	ALDH3A1;MAOB;ALDH1B1;LCMT2
Post-translational modification: biosynthesis of GPI-anchored proteins	4/29	0.0963032	0.999853	2.47861	5.80058	DPM1;PGAP1;PIGM;PIGL
Sema4D in semaphorin signaling	4/29	0.0963032	0.999853	2.47861	5.80058	MYL6;RHOC;MET;RHOA
Axonogenesis regulation by p75 neurotrophin receptor	2/9	0.0999096	0.999853	4.42304	10.1884	LINGO1;RHOA
Tat-mediated elongation of the HIV-1 transcript	2/9	0.0999096	0.999853	4.42304	10.1884	ERCC2;GTF2H2
Urea cycle	2/9	0.0999096	0.999853	4.42304	10.1884	ARG2;ASS1
Peroxisome	8/78	0.100456	0.999853	1.77204	4.07223	ACOT8;PHYH;ACSL1;ACOX1;PXMP2;ACSL4;FAR1;MLYCD
Calcineurin in effects in keratinocyte differentiation	3/19	0.104916	0.999853	2.90362	6.54649	PPP3CB;SP3;PLCG1
Mitochondrial gene expression	3/19	0.104916	0.999853	2.90362	6.54649	ESRRA;MYEF2;MTERF3
Arginine and proline metabolism	6/54	0.108006	0.999853	1.93724	4.31147	ARG2;MAOB;ALDH1B1;AMD1;AZIN2;ASS1
Netrin-1 signaling	5/42	0.109238	0.999853	2.09381	4.63618	TRIO;TRPC6;PLCG1;UNC5D;RGMB
Developmental biology	32/420	0.110632	0.999853	1.28257	2.82363	TRIO;MED19;LPL;CCNC;ARHGAP39;MED16;CACNA1H;RPS6KA5;ACVR1C;MED31;PLCG1;CD36;SCN3B;SPAG9;MEF2B;TRPC6;RANBP9;UNC5D;RGMB;RHOC;MAPK14;RHOA;MED7;GFRA4;CACNB2;CDK8;MYL6;CACNB3;FABP4;PLXNB3;IAPP;MET
Dual incision reaction in GG-NER	3/20	0.118123	0.999853	2.73267	5.83706	ERCC2;GTF2H2;RAD23B
Calcitonin-like ligand receptors	2/10	0.120026	0.999853	3.86995	8.20447	CALCRL;IAPP
E2F-enabled inhibition of pre-replication complex formation	2/10	0.120026	0.999853	3.86995	8.20447	ORC5;ORC4
Second messenger role in netrin-1 signaling	2/10	0.120026	0.999853	3.86995	8.20447	TRPC6;PLCG1
Serotonin HTR1 group and FOS pathway	4/32	0.126816	0.999853	2.21269	4.56925	RPS6KA5;MAPK14;GNAI1;RHOA
Long-term depression	7/70	0.131741	0.999853	1.72204	3.49042	GNAZ;PPP1R17;PLA2G12A;GNA12;PLA2G4A;PLA2G3;GNAI1
Nicotine activity on dopaminergic neurons	3/21	0.131908	0.999853	2.58072	5.22763	KCNK9;DRD2;GNAI1
Fluoropyrimidine activity	4/33	0.137787	0.999853	2.13628	4.2342	DHFR;PPAT;ERCC2;GGH
CDC6 association with the ORC-origin complex	2/11	0.141022	0.999853	3.43977	6.73797	ORC5;ORC4
Cardiac protection against reactive oxygen species	2/11	0.141022	0.999853	3.43977	6.73797	GPX1;GABRA4
Stress fiber formation mediated by Rho-selective guanine exchange factor AKAP13	2/11	0.141022	0.999853	3.43977	6.73797	GNA12;RHOA
Telomerase protein component gene hTERT transcriptional regulation	2/11	0.141022	0.999853	3.43977	6.73797	MAX;SP3
Vitamin B5 (pantothenate) metabolism	2/11	0.141022	0.999853	3.43977	6.73797	PANK1;PPCDC
Asparagine N-linked glycosylation	8/85	0.144088	0.999853	1.61035	3.11978	DPM1;SEC23A;PMM1;DAD1;RFT1;PMM2;ALG10;ALG10B
BRCA1, BRCA2 and ATR roles in cancer susceptibility	3/22	0.14622	0.999853	2.44476	4.70041	FANCD2;RAD1;FANCE
CCR3 signaling in eosinophils	3/22	0.14622	0.999853	2.44476	4.70041	RHOA;CCR3;DECR1
RNA polymerase II promoter escape	3/22	0.14622	0.999853	2.44476	4.70041	ERCC2;GTF2H2;GTF2E2
Smooth muscle contraction	3/22	0.14622	0.999853	2.44476	4.70041	MYL6;MYL6B;VCL
Ether lipid metabolism	4/35	0.160803	0.999853	1.99824	3.65194	PLA2G12A;PLA2G3;PLA2G4A;CHPT1
Linoleic acid metabolism	4/35	0.160803	0.999853	1.99824	3.65194	PLA2G12A;ACSL1;PLA2G3;PLA2G4A
Angiogenesis	3/23	0.161008	0.999853	2.3224	4.24141	PLCG1;FGF2;FGFR2
Mitochondrial fatty acid beta-oxidation	3/23	0.161008	0.999853	2.3224	4.24141	ACSL1;ACSL4;DECR1
Facilitative sodium-independent glucose transporters	2/12	0.162715	0.999853	3.09563	5.6209	SLC2A10;SLC2A6
Hormone-sensitive lipase (HSL)-mediated triacylglycerol hydrolysis	2/12	0.162715	0.999853	3.09563	5.6209	FABP4;ABHD5
Opening of calcium channels triggered by depolarization of the presynaptic terminal	2/12	0.162715	0.999853	3.09563	5.6209	CACNB2;CACNB3
Platelet endothelial cell adhesion molecule 1 (PECAM1) interactions	2/12	0.162715	0.999853	3.09563	5.6209	YES1;PLCG1
Tandem pore domain potassium channels	2/12	0.162715	0.999853	3.09563	5.6209	KCNK9;KCNK17
FGF signaling pathway	6/61	0.164506	0.999853	1.69005	3.05022	CAMK2A;PLCG1;MAPK14;FGF2;MET;FGFR2
Lipid digestion, mobilization, and transport	5/48	0.164921	0.999853	1.80108	3.24606	FABP4;NPC1L1;LPL;ABHD5;APOB
N-glycan biosynthesis	5/48	0.164921	0.999853	1.80108	3.24606	DPM1;DAD1;RFT1;ALG10;ALG10B
HIF-1 degradation in normoxia	8/88	0.16524	0.999853	1.54971	2.79003	PSMD12;PSMB5;PSMD14;CAMK2A;PSMG4;PSMG1;MAPK14;HDAC9
Vascular smooth muscle contraction	10/116	0.167311	0.999853	1.46238	2.6146	MYL6;PLA2G12A;CALCRL;CYP4A22;GNA12;PLA2G3;PLA2G4A;MYL6B;MYLK3;RHOA
Fatty acid, triacylglycerol, and ketone body metabolism	14/173	0.167928	0.999853	1.36555	2.43644	ESRRA;ACSL1;MED19;CCNC;ACSL4;MED16;NPAS2;MED7;ACAT1;CDK8;ACOX1;MED31;CD36;DECR1
Proteasome complex	3/24	0.176221	0.999853	2.21169	3.83953	PSMD12;PSMB5;PSMD14
VEGF signaling pathway	7/76	0.177976	0.999853	1.57179	2.71308	PPP3CB;PLA2G12A;CHP1;PLA2G4A;PLA2G3;PLCG1;MAPK14
Alpha-hemoglobin stabilizing enzyme (AHSP) pathway	2/13	0.184945	0.999853	2.81406	4.74928	UROS;HBB
CBL-mediated ligand-induced downregulation of EGF receptors	2/13	0.184945	0.999853	2.81406	4.74928	SH3GLB1;MET
Double stranded RNA-induced gene expression	2/13	0.184945	0.999853	2.81406	4.74928	EIF2S2;EIF2S1
Translation factors	5/50	0.185587	0.999853	1.72084	2.8983	EIF3J;EIF2S2;EIF2S1;EIF3A;PAIP1
G alpha (12/13) signaling events	7/77	0.186282	0.999853	1.54925	2.60352	TRIO;MCF2;GNA12;ARHGEF4;RHOC;KALRN;RHOA
Neural crest differentiation	8/91	0.187724	0.999853	1.49346	2.49823	CTBP2;WNT3A;HEY2;ZIC1;TWIST1;FGF2;HDAC9;FGFR2
Fatty acid biosynthesis	3/25	0.191811	0.999853	2.11105	3.48586	ACSL1;ACSL4;DECR1
Ghrelin pathway	3/25	0.191811	0.999853	2.11105	3.48586	LPL;ACAT1;ATG5
Calcium signaling pathway	14/178	0.194615	0.999853	1.32356	2.16632	PDE1C;CHRNA7;TNNC1;CHRM5;CAMK2A;PTGER3;TACR3;MYLK3;CACNA1H;PPP3CB;CHP1;VDAC1;PLCG1;SLC25A4
Glutathione metabolism	5/51	0.196257	0.999853	1.68335	2.74104	GGCT;GPX1;GSTO2;MGST3;MGST2
RAC1 activity regulation	4/38	0.197668	0.999853	1.82164	2.95317	TRIO;CHN2;MCF2;KALRN
Antigen processing: cross presentation	7/79	0.203354	0.999853	1.50606	2.39886	PSMD12;PSMB5;PSMD14;SEC61G;CD36;SEC61B;HLA-G
Acetylcholine binding and downstream events	2/14	0.207566	0.999853	2.57942	4.05564	CHRNB4;CHRNA7
Coagulation common pathway	2/14	0.207566	0.999853	2.57942	4.05564	F2;F5
HIV-1 early elongation complex formation	2/14	0.207566	0.999853	2.57942	4.05564	ERCC2;GTF2H2
Non-homologous end-joining (NHEJ) pathway	2/14	0.207566	0.999853	2.57942	4.05564	FEN1;POLL
Galactose metabolism	3/26	0.207728	0.999853	2.01916	3.17316	MGAM;LALBA;PGM1
PGC-1a regulation	3/26	0.207728	0.999853	2.01916	3.17316	ESRRA;PPP3CB;CAMK2A
Cytoplasmic ribosomal proteins	9/108	0.209683	0.999853	1.40856	2.2004	RPL4;RPL37A;EIF3J;RPL9P7;RPL9;RPS13;EIF3A;RPL26L1;RPL7
Vitamin A and carotenoid metabolism	4/39	0.210487	0.999853	1.76949	2.75746	NPC1L1;RDH10;LPL;CD36
Signaling by TGF-beta receptor complex	6/66	0.211088	0.999853	1.5488	2.40913	CDK8;STRAP;NEDD4L;CCNC;RHOA;UCHL5
Post-translational protein modification	15/196	0.212727	0.999853	1.28481	1.98856	SEC23A;GALNT5;PGAP1;PMM1;PMM2;F2;ALG10;DPM1;DAD1;RFT1;PIGM;PIGL;ALG10B;ST3GAL1;GALNT9
Rho GTPase cycle	10/123	0.2143	0.999853	1.37128	2.11228	TRIO;CHN2;MCF2;ARHGAP29;ARHGEF4;ARHGAP39;RHOC;KALRN;RHOD;RHOA
Amyotrophic lateral sclerosis (ALS)	5/53	0.218199	0.999853	1.61303	2.4556	PPP3CB;GPX1;DERL1;CHP1;MAPK14
GABA A and B receptor activation	5/53	0.218199	0.999853	1.61303	2.4556	GABRB3;GABRB2;GABRA4;GABRG2;GNAI1
Neuroactive ligand-receptor interaction	20/272	0.218741	0.999853	1.23086	1.87074	GABRB3;GABRB2;CHRNB4;CALCRL;GABRA4;CHRNA7;PTGER3;CHRM5;TACR3;OPRK1;F2;GABRG2;GRM3;MAS1;TSPO;CHRNA10;S1PR3;AGTR2;DRD2;PRSS2
Association of licensing factors with the pre-replicative complex	2/15	0.230448	0.999853	2.38087	3.49448	ORC5;ORC4
Extrinsic prothrombin activation pathway	2/15	0.230448	0.999853	2.38087	3.49448	F2;F5
Alpha-M beta-2 integrin signaling	4/41	0.236779	0.999853	1.67367	2.41113	RAP1B;YES1;APOB;RHOA
RNA polymerase III transcription initiation From type 3 promoter	3/28	0.240357	0.999853	1.85743	2.64801	SNAPC5;SNAPC1;POLR3H
TGF-beta receptor activation of SMADs	3/28	0.240357	0.999853	1.85743	2.64801	NEDD4L;STRAP;UCHL5
Vibrio cholerae infection	5/55	0.24085	0.999853	1.54835	2.2042	ATP6V1G2;SEC61G;SEC61B;PLCG1;TJP2
Aldosterone-regulated sodium reabsorption	4/42	0.250204	0.999853	1.62954	2.25769	FXYD2;ATP1A3;NEDD4L;ATP1B3
Eukaryotic transcription initiation	4/42	0.250204	0.999853	1.62954	2.25769	ERCC2;POLR3H;GTF2H2;GTF2E2
Thromboxane A2 receptor signaling	5/56	0.252406	0.999853	1.51791	2.08973	YES1;GNA12;MAPK14;RHOA;RAB11A
Acyl chain remodelling of phosphatidylinositol	2/16	0.253476	0.999853	2.21069	3.03415	PLA2G12A;PLA2G4A
Control of cell cycle and breast tumor growth by estrogen-responsive protein Efp	2/16	0.253476	0.999853	2.21069	3.03415	CDK8;CDK3
Glyoxylate and dicarboxylate metabolism	2/16	0.253476	0.999853	2.21069	3.03415	MTHFD1L;ACO1
Hypoxia-inducible factor in the cardivascular system	2/16	0.253476	0.999853	2.21069	3.03415	LDHA;COPS5
Inhibition of platelet activation by aspirin	2/16	0.253476	0.999853	2.21069	3.03415	PLA2G4A;F2
Pantothenate and CoA biosynthesis	2/16	0.253476	0.999853	2.21069	3.03415	PANK1;PPCDC
Rap1 signaling	2/16	0.253476	0.999853	2.21069	3.03415	RAP1B;RAPGEF3
Association of TriC/CCT with target proteins during biosynthesis	3/29	0.256978	0.999853	1.78589	2.42661	KIF13A;FBXL5;CCT5
CDO in myogenesis	3/29	0.256978	0.999853	1.78589	2.42661	SPAG9;MEF2B;MAPK14
Homologous recombination	3/29	0.256978	0.999853	1.78589	2.42661	XRCC2;SSBP1;RAD54B
Inhibition of insulin secretion by adrenaline/noradrenaline	3/29	0.256978	0.999853	1.78589	2.42661	CACNB2;CACNB3;GNAI1
Myc active pathway	7/85	0.257774	0.999853	1.38976	1.88406	LDHA;MAX;PDCD10;PEG10;NDUFAF2;EIF2S1;HSPD1
Cell differentiation by G alpha (i/o) pathway inferred from mouse Neuro2A model	4/43	0.263785	0.999853	1.58767	2.11576	RAP1B;RPS6KA5;DRD2;RASGRP4
Activation of mRNA upon binding of the cap-binding complex and eIFs, and subsequent binding to 43S	5/57	0.264095	0.999853	1.48864	1.98204	EIF3J;EIF2S2;EIF2S1;RPS13;EIF3A
Glycerophospholipid biosynthesis	7/86	0.267236	0.999853	1.3721	1.81065	PGS1;PLA2G12A;PNPLA8;PLA2G4A;PLA2G3;CHPT1;CRLS1
Abacavir metabolism	1/5	0.269042	0.999853	3.86759	5.0777	ADAL
Axonal growth stimulation	1/5	0.269042	0.999853	3.86759	5.0777	RHOA
Coenzyme A biosynthesis	1/5	0.269042	0.999853	3.86759	5.0777	PPCDC
Cycling of Ran in nucleocytoplasmic transport	1/5	0.269042	0.999853	3.86759	5.0777	RANBP1
Cytochrome P450 metabolism of eicosanoids	1/5	0.269042	0.999853	3.86759	5.0777	CYP4F3
Cytochrome P450 metabolism of miscellaneous substrates	1/5	0.269042	0.999853	3.86759	5.0777	CYP2W1
Dopamine receptors	1/5	0.269042	0.999853	3.86759	5.0777	DRD2
FGFR1b ligand binding and activation	1/5	0.269042	0.999853	3.86759	5.0777	FGF2
Flap intermediate removal from the telomere lagging strand (C-strand)	1/5	0.269042	0.999853	3.86759	5.0777	FEN1
Ion channel and phorbal esters signaling pathway	1/5	0.269042	0.999853	3.86759	5.0777	PLCG1
Ketone body metabolism	1/5	0.269042	0.999853	3.86759	5.0777	ACAT1
Kit receptor transcriptional targets	1/5	0.269042	0.999853	3.86759	5.0777	BNIP3
Muscarinic acetylcholine receptors	1/5	0.269042	0.999853	3.86759	5.0777	CHRM5
Sodium-coupled phosphate cotransporters	1/5	0.269042	0.999853	3.86759	5.0777	SLC34A2
Sodium-coupled sulphate, di- and tri-carboxylate transporters	1/5	0.269042	0.999853	3.86759	5.0777	SLC13A3
Tachykinin receptors bind tachykinins	1/5	0.269042	0.999853	3.86759	5.0777	TACR3
Glutamate binding and activation of AMPA receptors and synaptic plasticity	3/30	0.273747	0.999853	1.71966	2.2279	CAMK2A;MYO6;PICK1
O-glycan biosynthesis	3/30	0.273747	0.999853	1.71966	2.2279	GALNT5;ST3GAL1;GALNT9
ACE inhibitor pathway	2/17	0.276549	0.999853	2.0632	2.65198	MAS1;AGTR2
Acyl chain remodelling of phosphatidylserine	2/17	0.276549	0.999853	2.0632	2.65198	PLA2G12A;PLA2G4A
Branched-chain amino acid catabolism	2/17	0.276549	0.999853	2.0632	2.65198	HIBADH;ACAT1
Chylomicron-mediated lipid transport	2/17	0.276549	0.999853	2.0632	2.65198	LPL;APOB
Destabilization of mRNA by KSRP	2/17	0.276549	0.999853	2.0632	2.65198	EXOSC4;MAPK14
Glycosylphosphatidylinositol (GPI) biosynthesis	2/17	0.276549	0.999853	2.0632	2.65198	PIGM;PIGL
HIV-1 elongation complex formation in the absence of HIV-1 Tat	2/17	0.276549	0.999853	2.0632	2.65198	ERCC2;GTF2H2
Renin-angiotensin system	2/17	0.276549	0.999853	2.0632	2.65198	MAS1;AGTR2
TAK1-mediated activation of p38 MAPK	2/17	0.276549	0.999853	2.0632	2.65198	IRAK2;MAPK14
G-protein-mediated events	4/44	0.277498	0.999853	1.54789	1.98431	GNAZ;PDE1C;PLA2G4A;GNAI1
Lysine degradation	4/44	0.277498	0.999853	1.54789	1.98431	ALDH1B1;OGDH;PLOD2;ACAT1
NCAM1 interactions	4/44	0.277498	0.999853	1.54789	1.98431	CACNB2;CACNB3;CACNA1H;GFRA4
Vasopressin-regulated water reabsorption	4/44	0.277498	0.999853	1.54789	1.98431	DYNC2H1;DYNC1LI1;CREB3L2;RAB11A
Antigen presentation: folding, assembly, and peptide loading of class I MHC proteins	18/255	0.28877	0.999853	1.17687	1.46181	ANAPC13;PSMD12;SEC23A;UBE3C;PSMD14;UBA5;NEDD4L;UBE2J2;HLA-G;ANAPC10;NPEPPS;PSMB5;GAN;SEC61G;CD36;SEC61B;TRIM11;RNF220
Amino acid transport across the plasma membrane	3/31	0.290624	0.999853	1.65815	2.04902	SLC43A2;SLC6A14;SLC38A3
One-carbon metabolism	3/31	0.290624	0.999853	1.65815	2.04902	DHFR;MTHFD1L;ST20-MTHFS
Signal amplification	3/31	0.290624	0.999853	1.65815	2.04902	PLA2G4A;MAPK14;GNAI1
CDK regulation of DNA replication	2/18	0.299575	0.999853	1.93415	2.3314	ORC5;ORC4
Fatty acyl-CoA biosynthesis	2/18	0.299575	0.999853	1.93415	2.3314	ACSL1;ACSL4
Pertussis toxin-insensitive CCR5 signaling in macrophage	2/18	0.299575	0.999853	1.93415	2.3314	PLCG1;MAPK14
Glycolysis and gluconeogenesis	6/75	0.30405	0.999853	1.34614	1.60266	LDHC;PDHX;ALDH3A1;LDHA;ALDH1B1;PGM1
Polo-like kinase 1 (PLK1) pathway	4/46	0.305235	0.999853	1.47403	1.74919	RAB1A;KIF2A;NINL;RHOA
Alanine, aspartate and glutamate metabolism	3/32	0.30757	0.999853	1.60089	1.88753	PPAT;NIT2;ASS1
Syndecan 4 pathway	3/32	0.30757	0.999853	1.60089	1.88753	F2;FGF2;RHOA
Cytochrome P450 pathway	5/61	0.311904	0.999853	1.38201	1.61012	CYB5A;CYB5R4;CYP2W1;CYP4A22;CYP4F3
Leptin signaling pathway	5/61	0.311904	0.999853	1.38201	1.61012	CFL2;KPNA4;PLCG1;MAPK14;RHOA
Licensing factor removal from origins	5/61	0.311904	0.999853	1.38201	1.61012	ORC5;ORC4;PSMD12;PSMB5;PSMD14
Acyl chain remodeling of cardiolipin	1/6	0.313459	0.999853	3.0939	3.5892	PLA2G4A
FGFR2b ligand binding and activation	1/6	0.313459	0.999853	3.0939	3.5892	FGFR2
Fas signaling pathway in hepatocytes	1/6	0.313459	0.999853	3.0939	3.5892	YES1
G beta-gamma signaling through PI3K gamma	1/6	0.313459	0.999853	3.0939	3.5892	RHOA
Mitochondrial beta-oxidation of unsaturated fatty acids	1/6	0.313459	0.999853	3.0939	3.5892	DECR1
Small interfering RNA (siRNA) biogenesis	1/6	0.313459	0.999853	3.0939	3.5892	TARBP2
Nucleotide-binding domain, leucine rich repeat containing receptor (NLR) signaling pathways	4/47	0.319214	0.999853	1.43967	1.64395	IRAK2;CARD9;SUGT1;MAPK14
Regulation of transcription by NOTCH1 intracellular domain	4/47	0.319214	0.999853	1.43967	1.64395	CDK8;HEY2;CCNC;HDAC9
Hypoxic and oxygen homeostasis regulation of HIF-1-alpha	2/19	0.322476	0.999853	1.82028	2.06006	EGLN1;COPS5
Resolution of abasic sites (AP sites)	2/19	0.322476	0.999853	1.82028	2.06006	FEN1;LIG3
Small ligand GPCRs	2/19	0.322476	0.999853	1.82028	2.06006	PTGER3;S1PR3
E2F-mediated regulation of DNA replication	3/33	0.324548	0.999853	1.54744	1.74137	ORC5;DHFR;ORC4
Global genomic nucleotide excision repair (GG-NER)	3/33	0.324548	0.999853	1.54744	1.74137	ERCC2;GTF2H2;RAD23B
Energy metabolism	4/48	0.333241	0.999853	1.40688	1.546	ESRRA;PPP3CB;MEF2B;MAPK14
Folate metabolism	5/63	0.336244	0.999853	1.33421	1.45418	DHFR;ST20-MTHFS;HBB;F2;APOB
Cysteine and methionine metabolism	3/34	0.341525	0.999853	1.49744	1.60876	LDHC;LDHA;AMD1
EGF receptor transactivation by GPCRs in cardiac hypertrophy	3/34	0.341525	0.999853	1.49744	1.60876	PLCG1;AGTR2;RHOA
MAPK/TRK pathway	3/34	0.341525	0.999853	1.49744	1.60876	RAP1B;RPS6KA5;MAPK14
Monoamine transport	3/34	0.341525	0.999853	1.49744	1.60876	SPECC1L;FBXO32;MAPK14
Skeletal muscle hypertrophy is regulated via AKT/mTOR pathway	2/20	0.345182	0.999853	1.71906	1.82854	EIF2S2;EIF2S1
Urea cycle and metabolism of amino groups	2/20	0.345182	0.999853	1.71906	1.82854	ARG2;ASS1
Glycerophospholipid metabolism	6/79	0.347591	0.999853	1.2721	1.34427	PGS1;PLA2G12A;PLA2G4A;PLA2G3;CHPT1;CRLS1
Signaling events mediated by hepatocyte growth factor receptor (c-Met)	6/79	0.347591	0.999853	1.2721	1.34427	RAP1B;ARHGEF4;RANBP9;PLCG1;MET;RHOA
Arachidonate epoxygenase/epoxide hydrolase pathway	1/7	0.355179	0.999853	2.57812	2.6687	COX5A
Attachment of GPI anchor to uPAR	1/7	0.355179	0.999853	2.57812	2.6687	PGAP1
CREB phosphorylation	1/7	0.355179	0.999853	2.57812	2.6687	RPS6KA5
Creatine metabolism	1/7	0.355179	0.999853	2.57812	2.6687	SLC6A8
Gamma-secretase-mediated ErbB4 signaling pathway	1/7	0.355179	0.999853	2.57812	2.6687	NRG3
Highly sodium permeable acetylcholine nicotinic receptors	1/7	0.355179	0.999853	2.57812	2.6687	CHRNB4
Internal ribosome entry pathway	1/7	0.355179	0.999853	2.57812	2.6687	EIF3A
Phosphatidylglycerol biosynthesis	1/7	0.355179	0.999853	2.57812	2.6687	PGS1
SARS coronavirus protease	1/7	0.355179	0.999853	2.57812	2.6687	MAPK14
Telomerase RNA component gene hTERC transcriptional regulation	1/7	0.355179	0.999853	2.57812	2.6687	SP3
Terminal pathway of complement	1/7	0.355179	0.999853	2.57812	2.6687	C8A
Zinc efflux and compartmentalization by the SLC30 family	1/7	0.355179	0.999853	2.57812	2.6687	SLC30A2
Lipid and lipoprotein metabolism	32/489	0.356761	0.999853	1.08484	1.11813	MTMR14;PLA2G3;MED19;LPL;CCNC;ABHD5;MED16;NPAS2;TM7SF2;ACAT1;PGS1;SMPD2;NPC1L1;MED31;CD36;APOB;DECR1;ESRRA;ACOT8;PLA2G12A;PHYH;ACSL1;PNPLA8;PLA2G4A;ACSL4;CRLS1;MED7;CDK8;FABP4;ACOX1;FAR1;CHPT1
Basal transcription factors	3/35	0.358467	0.999853	1.45057	1.48817	TAF6L;GTF2H2;GTF2E2
Base excision repair	3/35	0.358467	0.999853	1.45057	1.48817	FEN1;POLL;LIG3
MEF2D role in T cell apoptosis	3/35	0.358467	0.999853	1.45057	1.48817	PPP3CB;CAPN2;PLCG1
Neuronal system	19/283	0.359633	0.999853	1.11451	1.13977	GABRB3;GABRB2;CHRNB4;KCNH5;KCNK9;GABRA4;CHRNA7;CAMK2A;KCNJ14;ABCC9;KCNK17;SYN2;GABRG2;GNAI1;CACNB2;CACNB3;MYO6;KCNN1;PICK1
LPA receptor mediated events	5/65	0.36073	0.999853	1.2896	1.31491	GNAZ;GNA12;PLCG1;RHOA;GNAI1
E-cadherin keratinocyte pathway	2/21	0.367632	0.999853	1.6285	1.62959	PLCG1;RHOA
Mitochondrial tRNA aminoacylation	2/21	0.367632	0.999853	1.6285	1.62959	PPA2;YARS2
Oxidative stress-induced gene expression via Nrf2	2/21	0.367632	0.999853	1.6285	1.62959	FXYD2;MAPK14
PKC-catalyzed phosphorylation of inhibitory phosphoprotein of myosin phosphatase	2/21	0.367632	0.999853	1.6285	1.62959	TRIO;GNA12
Class A GPCRs (rhodopsin-like)	17/253	0.369322	0.999853	1.11532	1.11096	GPR15;GPR37;OR1D2;PTGER3;CHRM5;CXCR5;GPR63;OR1I1;OPRK1;GPR37L1;MAS1;HCAR1;CXCR2;SPECC1L;AGTR2;DRD2;CCR3
Transmission across chemical synapses	13/190	0.369885	0.999853	1.13701	1.13083	GABRB3;GABRB2;CHRNB4;CHRNA7;GABRA4;CAMK2A;SYN2;GABRG2;GNAI1;CACNB2;CACNB3;MYO6;PICK1
S phase	8/112	0.371019	0.999853	1.19056	1.18044	ORC5;ORC4;PSMD12;FEN1;PSMB5;PSMD14;MAX;CKS1B
HIF-1 transcriptional activity in hypoxia	5/66	0.372996	0.999853	1.26839	1.25087	EGLN1;LDHA;COPS5;BNIP3;PGM1
Semaphorin interactions	5/66	0.372996	0.999853	1.26839	1.25087	MYL6;PLXNB3;RHOC;MET;RHOA
Phospholipids as signaling intermediaries	3/36	0.375346	0.999853	1.40654	1.37828	SMPD2;GNAI1;RHOA
Beta-alanine metabolism	2/22	0.389773	0.999853	1.54699	1.45756	ALDH1B1;MLYCD
CTLA4 inhibitory signaling	2/22	0.389773	0.999853	1.54699	1.45756	YES1;PPP2R5E
Fanconi anemia pathway	2/22	0.389773	0.999853	1.54699	1.45756	FANCD2;FANCE
Platelet aggregation (plug formation)	3/37	0.392132	0.999853	1.3651	1.27795	RAP1B;F2;RAPGEF3
Beta-oxidation of pristanoyl-CoA	1/8	0.394365	0.999853	2.2097	2.05607	ACOT8
Cross-presentation of particulate exogenous antigens (phagosomes)	1/8	0.394365	0.999853	2.2097	2.05607	CD36
Digestion of dietary carbohydrate	1/8	0.394365	0.999853	2.2097	2.05607	MGAM
Eosinophils in the chemokine network of allergy	1/8	0.394365	0.999853	2.2097	2.05607	CCR3
Folate and pterine metabolism	1/8	0.394365	0.999853	2.2097	2.05607	DHFR
Glycogen biosynthesis	1/8	0.394365	0.999853	2.2097	2.05607	PGM1
Hydrolysis of lysophosphatidylcholine (LPC)	1/8	0.394365	0.999853	2.2097	2.05607	PLA2G4A
Lysine catabolism	1/8	0.394365	0.999853	2.2097	2.05607	OGDH
Lysosphingolipid and lysophosphatidic acid (LPA) G-protein coupled receptors	1/8	0.394365	0.999853	2.2097	2.05607	S1PR3
Organic cation transport	1/8	0.394365	0.999853	2.2097	2.05607	SLC22A15
Oxygen/carbon dioxide exchange in erythrocytes	1/8	0.394365	0.999853	2.2097	2.05607	HBB
Thiamine metabolism	1/8	0.394365	0.999853	2.2097	2.05607	THTPA
Transcription factor regulation of microRNAs related to cardiac hypertrophy	1/8	0.394365	0.999853	2.2097	2.05607	MYEF2
Visceral fat deposits and the metabolic syndrome	1/8	0.394365	0.999853	2.2097	2.05607	LPL
Epithelial cell signaling in Helicobacter pylori infection	5/68	0.397512	0.999853	1.22799	1.13286	ATP6V1G2;CXCR2;PLCG1;MAPK14;MET
Protein folding	4/53	0.403408	0.999853	1.26298	1.14654	VBP1;KIF13A;FBXL5;CCT5
Thrombin signaling through protease-activated receptors	4/53	0.403408	0.999853	1.26298	1.14654	GNA12;F2;RHOA;GNAI1
CXCR4 signaling pathway	8/116	0.408455	0.999853	1.14621	1.02629	RAP1B;GNAZ;YES1;ITGA10;PLCG1;RHOC;RHOA;GNAI1
EGFR interaction with phospholipase C-gamma	3/38	0.408801	0.999853	1.32603	1.18617	PDE1C;PLA2G4A;PLCG1
Striated muscle contraction	3/38	0.408801	0.999853	1.32603	1.18617	MYBPC1;TNNC1;MYH8
p38 alpha/beta MAPK downstream pathway	3/38	0.408801	0.999853	1.32603	1.18617	RPS6KA5;PLA2G4A;MAPK14
NFAT involvement in hypertrophy of the heart	5/69	0.409739	0.999853	1.20874	1.07848	PPP3CB;F2;MAPK14;FGF2;HDAC9
Blood clotting cascade	2/23	0.411561	0.999853	1.47325	1.30795	F2;F5
CREB transcription factor and its extracellular signals	2/23	0.411561	0.999853	1.47325	1.30795	RPS6KA5;MAPK14
Collagen binding in corneal epithelia mediated by Erk and PI-3 Kinase	2/23	0.411561	0.999853	1.47325	1.30795	PLCG1;RHOA
Eicosanoid metabolism	2/23	0.411561	0.999853	1.47325	1.30795	PTGER3;PLA2G4A
FGFR ligand binding and activation	2/23	0.411561	0.999853	1.47325	1.30795	FGF2;FGFR2
Mismatch repair	2/23	0.411561	0.999853	1.47325	1.30795	MSH2;SSBP1
Mitochondrial pathway of apoptosis: antiapoptotic Bcl-2 family	2/23	0.411561	0.999853	1.47325	1.30795	AVEN;MAPK14
Rho cell motility signaling pathway	2/23	0.411561	0.999853	1.47325	1.30795	RHOA;VCL
Signaling by bone morphogenetic protein (BMP)	2/23	0.411561	0.999853	1.47325	1.30795	GREM2;SMAD9
Phospholipase C-mediated cascade	4/54	0.417325	0.999853	1.23765	1.08157	PDE1C;PLCG1;FGF2;FGFR2
Long-term potentiation	5/70	0.42193	0.999853	1.19008	1.02694	RAP1B;PPP3CB;CAMK2A;CHP1;RAPGEF3
NCAM signaling for neurite out-growth	5/70	0.42193	0.999853	1.19008	1.02694	CACNB2;CACNB3;RPS6KA5;CACNA1H;GFRA4
Aurora B signaling	3/39	0.425327	0.999853	1.28912	1.10207	NSUN2;CDCA8;RHOA
HIV-1 transcription initiation	3/39	0.425327	0.999853	1.28912	1.10207	ERCC2;GTF2H2;GTF2E2
Alpha defensins	1/9	0.431172	0.999853	1.93338	1.62645	PRSS2
Alpha-4 beta-7 integrin signaling	1/9	0.431172	0.999853	1.93338	1.62645	RHOA
COPII-mediated vesicle transport	1/9	0.431172	0.999853	1.93338	1.62645	SEC23A
Calcium-activated potassium channels	1/9	0.431172	0.999853	1.93338	1.62645	KCNN1
Elevation of cytosolic calcium levels	1/9	0.431172	0.999853	1.93338	1.62645	TRPC6
Endosomal/vacuolar pathway	1/9	0.431172	0.999853	1.93338	1.62645	HLA-G
Folding of actin by CCT/TriC	1/9	0.431172	0.999853	1.93338	1.62645	CCT5
Heme biosynthesis	1/9	0.431172	0.999853	1.93338	1.62645	UROS
Inactivation of Cdc42 and Rac	1/9	0.431172	0.999853	1.93338	1.62645	ARHGAP39
Ketone body biosynthesis and degradation	1/9	0.431172	0.999853	1.93338	1.62645	ACAT1
MAP kinase pathway regulation through dual specificity phosphatases	1/9	0.431172	0.999853	1.93338	1.62645	MAPK14
PI3K/AKT signalling	1/9	0.431172	0.999853	1.93338	1.62645	RHOA
PPAR-gamma coactivator role in obesity and thermogenesis	1/9	0.431172	0.999853	1.93338	1.62645	LPL
Prostanoid ligand receptors	1/9	0.431172	0.999853	1.93338	1.62645	PTGER3
Rapid glucocorticoid receptor pathway	1/9	0.431172	0.999853	1.93338	1.62645	MAPK14
Plexin D1 signaling	2/24	0.432955	0.999853	1.40621	1.17716	SEMA3C;ITGA10
Protein export	2/24	0.432955	0.999853	1.40621	1.17716	SEC61G;SEC61B
Ras-independent pathway in NK cell-mediated cytotoxicity	2/24	0.432955	0.999853	1.40621	1.17716	FCGR3A;FCGR3B
Signal transduction of S1P receptor	2/24	0.432955	0.999853	1.40621	1.17716	S1PR3;GNAI1
Phase II of biological oxidations: conjugation	5/71	0.434076	0.999853	1.17199	0.978067	GGCT;GSTO2;MGST3;MGST2;SULT4A1
Mitotic G1-G1/S phases	9/135	0.436435	0.999853	1.10513	0.91628	ORC5;DHFR;ORC4;PSMD12;PSMB5;CDKN2C;PSMD14;MAX;CKS1B
Cyclin A-Cdk2-associated events at S phase entry	5/72	0.446165	0.999853	1.15443	0.931706	PSMD12;PSMB5;PSMD14;MAX;CKS1B
MAPK signaling pathway	20/314	0.446469	0.999853	1.05263	0.848825	PLA2G12A;MAX;PLA2G3;PLA2G4A;MAPK8IP2;MAPK14;MAPK8IP3;FGF2;CACNA1H;RASGRP4;RAP1B;CACNB2;PPP3CB;CACNB3;RPS6KA5;ACVR1C;GNA12;CHP1;FGF12;FGFR2
Phosphoinositides and their downstream targets	2/25	0.453924	0.999853	1.34499	1.06231	JAG1;PLCG1
RNA polymerase I transcription initiation	2/25	0.453924	0.999853	1.34499	1.06231	ERCC2;GTF2H2
DNA repair	7/105	0.456299	0.999853	1.10496	0.866955	FEN1;FANCD2;ERCC2;LIG3;GTF2H2;FANCE;RAD23B
Fc epsilon receptor I signaling in mast cells	3/41	0.457865	0.999853	1.22114	0.953933	PPP3CB;PLA2G4A;PLCG1
Plasma membrane estrogen receptor signaling	3/41	0.457865	0.999853	1.22114	0.953933	GNAZ;GNAI1;RHOA
Transcriptional activity of SMAD2/SMAD3-SMAD4 heterotrimer	3/41	0.457865	0.999853	1.22114	0.953933	CDK8;NEDD4L;CCNC
Tyrosine metabolism	3/41	0.457865	0.999853	1.22114	0.953933	ALDH3A1;MAOB;LCMT2
Myc repressed pathway	5/73	0.458187	0.999853	1.1374	0.887712	LGALS1;MAX;TMEM126A;GTF2H2;TJP2
Signaling by NOTCH1	5/73	0.458187	0.999853	1.1374	0.887712	CDK8;JAG1;HEY2;CCNC;HDAC9
Phagosome	10/154	0.460915	0.999853	1.07429	0.832079	DYNC2H1;DYNC1LI1;FCGR3A;ATP6V1G2;FCGR3B;SEC61G;CD36;SEC61B;SEC22B;HLA-G
Abacavir transport and metabolism	1/10	0.465744	0.999853	1.71847	1.31312	ADAL
Activation of the AP-1 family of transcription factors	1/10	0.465744	0.999853	1.71847	1.31312	MAPK14
Electron transport reaction in mitochondria	1/10	0.465744	0.999853	1.71847	1.31312	SLC25A4
Fanconi anemia pathway regulation	1/10	0.465744	0.999853	1.71847	1.31312	FANCD2
Free radical-induced apoptosis	1/10	0.465744	0.999853	1.71847	1.31312	GPX1
Ganglio sphingolipid metabolism	1/10	0.465744	0.999853	1.71847	1.31312	ST3GAL1
Gap junction degradation	1/10	0.465744	0.999853	1.71847	1.31312	MYO6
IRAK2-mediated activation of TAK1 complex	1/10	0.465744	0.999853	1.71847	1.31312	IRAK2
NODAL signaling regulation	1/10	0.465744	0.999853	1.71847	1.31312	ACVR1C
Nef-mediated downregulation of MHC class I complex cell surface expression	1/10	0.465744	0.999853	1.71847	1.31312	AP1G1
Netrin mediated repulsion signals	1/10	0.465744	0.999853	1.71847	1.31312	UNC5D
Phospholipase C signaling pathway	1/10	0.465744	0.999853	1.71847	1.31312	PLCG1
Purine catabolism	1/10	0.465744	0.999853	1.71847	1.31312	GPX1
Ran role in mitotic spindle regulation	1/10	0.465744	0.999853	1.71847	1.31312	RANBP1
Signal-dependent regulation of myogenesis by corepressor MITR	1/10	0.465744	0.999853	1.71847	1.31312	HDAC9
Tetrahydrobiopterin (BH4) biosynthesis, recycling, salvage and regulation	1/10	0.465744	0.999853	1.71847	1.31312	DHFR
Gastric acid secretion	5/74	0.470135	0.999853	1.12085	0.845948	CAMK2A;ATP1A3;ATP1B3;MYLK3;GNAI1
Biological oxidations	9/139	0.471312	0.999853	1.0709	0.805565	GGCT;CYP2W1;MAOB;GSTO2;SMOX;MGST3;CYP4F3;MGST2;SULT4A1
Autodegradation of Cdh1 by Cdh1-APC/C	4/58	0.472095	0.999853	1.14573	0.859959	PSMD12;PSMB5;PSMD14;ANAPC10
Nucleotide excision repair	4/58	0.472095	0.999853	1.14573	0.859959	ERCC2;GTF2H2;RAD23B;GTF2H5
Tryptophan metabolism	4/58	0.472095	0.999853	1.14573	0.859959	MAOB;ALDH1B1;OGDH;ACAT1
VEGF, hypoxia, and angiogenesis	3/42	0.473839	0.999853	1.18977	0.888623	PLCG1;EIF2S2;EIF2S1
Inhibition of activated T cell apoptosis by neuropeptides VIP and PACAP	2/26	0.474441	0.999853	1.28888	0.961016	PPP3CB;PLCG1
TGF-beta signaling in development	2/26	0.474441	0.999853	1.28888	0.961016	ACVR1C;SMAD9
p75 neurotrophin receptor-mediated signaling	8/124	0.482843	0.999853	1.06671	0.776632	SMPD2;LINGO1;TRIO;MCF2;ARHGEF4;RHOC;KALRN;RHOA
G2/M checkpoints	3/43	0.489593	0.999853	1.15996	0.828422	ORC5;ORC4;RAD1
Insulin secretion regulation by glucagon-like peptide-1	3/43	0.489593	0.999853	1.15996	0.828422	RAP1B;GCG;RAPGEF3
Influenza viral RNA transcription and replication	8/125	0.492001	0.999853	1.05753	0.750081	RPL4;SMG1;RPL37A;RPL9;RPS13;RPL26L1;IPO5;RPL7
Integration of energy metabolism	8/125	0.492001	0.999853	1.05753	0.750081	RAP1B;CACNB2;CACNB3;GCG;TKT;SLC25A4;RAPGEF3;GNAI1
Collecting duct acid secretion	2/27	0.494482	0.999853	1.23726	0.871336	ATP6V1G2;CLCNKB
Cooperation of prefoldin and TriC/CCT in actin and tubulin folding	2/27	0.494482	0.999853	1.23726	0.871336	VBP1;CCT5
Glucuronidation	2/27	0.494482	0.999853	1.23726	0.871336	PGM5;PGM1
Kinesins	2/27	0.494482	0.999853	1.23726	0.871336	KIF9;KIF2A
Oxidative stress	2/27	0.494482	0.999853	1.23726	0.871336	MT1X;MAPK14
Pentose phosphate pathway	2/27	0.494482	0.999853	1.23726	0.871336	TKT;PGM1
TNF/stress-related signaling	2/27	0.494482	0.999853	1.23726	0.871336	CRADD;MAPK14
ALK2 pathway	1/11	0.498216	0.999853	1.54654	1.07751	SMAD9
Alternative complement pathway	1/11	0.498216	0.999853	1.54654	1.07751	C8A
Apoptotic cleavage of cell adhesion proteins	1/11	0.498216	0.999853	1.54654	1.07751	TJP2
Down syndrome cell adhesion molecule (DSCAM) interactions	1/11	0.498216	0.999853	1.54654	1.07751	MAPK14
Gamma-carboxylation, transport, and amino-terminal cleavage of proteins	1/11	0.498216	0.999853	1.54654	1.07751	F2
Glutathione biosynthesis and recycling	1/11	0.498216	0.999853	1.54654	1.07751	GGCT
Hormone ligand-binding G-protein coupled receptors	1/11	0.498216	0.999853	1.54654	1.07751	GNRHR2
Mechanism of protein import into the nucleus	1/11	0.498216	0.999853	1.54654	1.07751	NUTF2
Messenger RNA decay by 3' to 5' exoribonuclease	1/11	0.498216	0.999853	1.54654	1.07751	EXOSC4
Purine ribonucleoside monophosphate biosynthesis	1/11	0.498216	0.999853	1.54654	1.07751	PPAT
SLBP-dependent processing of replication-dependent histone pre-mRNAs	1/11	0.498216	0.999853	1.54654	1.07751	SNRPG
Signaling by activated point mutants of FGFR1	1/11	0.498216	0.999853	1.54654	1.07751	FGF2
TGF-beta signaling in gastrointestinal stem cells	1/11	0.498216	0.999853	1.54654	1.07751	SMAD9
Ephrin receptor B forward pathway	4/60	0.498759	0.999853	1.1047	0.768461	RAP1B;YES1;EPHB1;KALRN
Neurotrophic factor-mediated Trk receptor signaling	4/60	0.498759	0.999853	1.1047	0.768461	RAP1B;NEDD4L;PLCG1;RHOA
HNF3A pathway	3/44	0.505113	0.999853	1.13161	0.772861	GCG;NDUFV3;APOB
Valine, leucine and isoleucine degradation	3/44	0.505113	0.999853	1.13161	0.772861	HIBADH;ALDH1B1;ACAT1
Dual incision reaction in TC-NER	2/28	0.51403	0.999853	1.18961	0.791656	ERCC2;GTF2H2
Endosomal sorting complex required for transport (ESCRT) pathway	2/28	0.51403	0.999853	1.18961	0.791656	SNF8;STAM2
G-protein activation	2/28	0.51403	0.999853	1.18961	0.791656	GNAZ;GNAI1
Messenger RNA capping	2/28	0.51403	0.999853	1.18961	0.791656	ERCC2;GTF2H2
PERK-regulated gene expression	2/28	0.51403	0.999853	1.18961	0.791656	EXOSC4;EIF2S1
Phosphatidic acid biosynthesis	2/28	0.51403	0.999853	1.18961	0.791656	PLA2G12A;PLA2G4A
Amino sugar and nucleotide sugar metabolism	3/45	0.520383	0.999853	1.10461	0.721519	PMM1;PMM2;PGM1
RNA polymerase III transcription	3/45	0.520383	0.999853	1.10461	0.721519	SNAPC5;SNAPC1;POLR3H
RhoA signaling pathway	3/45	0.520383	0.999853	1.10461	0.721519	PKN2;RHOA;VCL
Signaling by FGFR mutants	3/45	0.520383	0.999853	1.10461	0.721519	PLCG1;FGF2;FGFR2
G-protein signaling pathways	6/95	0.521229	0.999853	1.04252	0.679269	GNAZ;PDE1C;GNA12;AKAP6;RHOA;GNAI1
Transport of inorganic cations/anions and amino acids/oligopeptides	6/95	0.521229	0.999853	1.04252	0.679269	SLC34A2;SLC12A5;SLC43A2;SLC6A14;SLC12A1;SLC38A3
Amino acid metabolism	12/195	0.524247	0.999853	1.01397	0.654812	ARG2;PSMD12;SLC6A8;PSMB5;HIBADH;PSMD14;SMOX;AMD1;OGDH;AZIN2;ASS1;ACAT1
Fc epsilon receptor I signaling pathway	5/79	0.528447	0.999853	1.04484	0.666413	PLA2G12A;PLA2G4A;PLA2G3;PLCG1;MAPK14
Activation of chaperones by ATF6 alpha	1/12	0.528716	0.999853	1.40587	0.895966	HSP90B1
Alanine and aspartate metabolism	1/12	0.528716	0.999853	1.40587	0.895966	ASS1
Bile salt and organic anion SLC transporters	1/12	0.528716	0.999853	1.40587	0.895966	SLC13A3
Dopamine neurotransmitter release cycle	1/12	0.528716	0.999853	1.40587	0.895966	SYN2
FGFR3 ligand binding and activation	1/12	0.528716	0.999853	1.40587	0.895966	FGF2
Gamma-aminobutyric acid receptor life cycle	1/12	0.528716	0.999853	1.40587	0.895966	GABRA4
Iron metabolism in placenta	1/12	0.528716	0.999853	1.40587	0.895966	ACO1
Nucleotide G-protein coupled receptors (GPCRs)	1/12	0.528716	0.999853	1.40587	0.895966	SPECC1L
Parkin role in the ubiquitin-proteasomal pathway	1/12	0.528716	0.999853	1.40587	0.895966	GPR37
Phospholipase C epsilon pathway	1/12	0.528716	0.999853	1.40587	0.895966	RAPGEF3
Pyruvate dehydrogenase (PDH) complex regulation	1/12	0.528716	0.999853	1.40587	0.895966	PDHX
Resolution of AP sites via the single-nucleotide replacement pathway	1/12	0.528716	0.999853	1.40587	0.895966	LIG3
SODD/TNFR1 signaling pathway	1/12	0.528716	0.999853	1.40587	0.895966	CRADD
SRF and microRNAs in smooth muscle differentiation and proliferation	1/12	0.528716	0.999853	1.40587	0.895966	MEF2B
Toll-like receptor endosomal trafficking and processing	1/12	0.528716	0.999853	1.40587	0.895966	HSP90B1
Transport of glucose and other sugars, bile salts and organic acids, metal ions and amine compounds	6/96	0.531596	0.999853	1.03088	0.651384	SLC13A3;SLC22A15;SLC2A10;SLC30A2;SLC6A14;SLC2A6
BARD1 signaling events	2/29	0.533071	0.999853	1.14549	0.72063	FANCD2;FANCE
Lipoprotein metabolism	2/29	0.533071	0.999853	1.14549	0.72063	LPL;APOB
Skeletal myogenesis control by HDAC and calcium/calmodulin-dependent kinase (CaMK)	2/29	0.533071	0.999853	1.14549	0.72063	PPP3CB;MAPK14
Statin pathway	2/29	0.533071	0.999853	1.14549	0.72063	LPL;APOB
T cell receptor calcium pathway	2/29	0.533071	0.999853	1.14549	0.72063	PPP3CB;CHP1
RhoA activity regulation	3/46	0.535394	0.999853	1.07886	0.674022	TRIO;MCF2;RHOA
Opioid signaling	5/80	0.539771	0.999853	1.03085	0.635634	GNAZ;PPP3CB;PDE1C;PLA2G4A;GNAI1
Ubiquitin-mediated degradation of phosphorylated Cdc25A	4/64	0.550219	0.999853	1.03083	0.615857	PSMD12;PSMB5;PSMD14;CKS1B
Activation of matrix metalloproteinases	2/30	0.551594	0.999853	1.10452	0.657128	MMP16;PRSS2
Activation of the pre-replicative complex	2/30	0.551594	0.999853	1.10452	0.657128	ORC5;ORC4
CDC42 activity regulation	2/30	0.551594	0.999853	1.10452	0.657128	MCF2;PLCG1
Nuclear events mediated by MAP kinases	2/30	0.551594	0.999853	1.10452	0.657128	RPS6KA5;MAPK14
Signaling by FGFR1 mutants	2/30	0.551594	0.999853	1.10452	0.657128	PLCG1;FGF2
Signaling pathway from G-protein families	2/30	0.551594	0.999853	1.10452	0.657128	PPP3CB;PLCG1
p38-alpha and p38-beta regulation	2/30	0.551594	0.999853	1.10452	0.657128	YES1;MAPK14
Calcium regulation in the cardiac cell	9/149	0.555981	0.999853	0.99387	0.583422	GNAZ;PKIB;CACNB3;FXYD2;CHRM5;CAMK2A;CASQ2;ATP1B3;GNAI1
Adenylate cyclase inhibitory pathway	1/13	0.557364	0.999853	1.28865	0.753261	GNAI1
Advanced glycosylation endproduct receptor signaling	1/13	0.557364	0.999853	1.28865	0.753261	CAPZA2
Angiotensin-converting enzyme 2 regulation of heart function	1/13	0.557364	0.999853	1.28865	0.753261	AGTR2
Cytosolic sulfonation of small molecules	1/13	0.557364	0.999853	1.28865	0.753261	SULT4A1
Downregulation of ERBB2-ERBB3 signaling	1/13	0.557364	0.999853	1.28865	0.753261	USP8
FGFR4 ligand binding and activation	1/13	0.557364	0.999853	1.28865	0.753261	FGF2
HIV life cycle early phase	1/13	0.557364	0.999853	1.28865	0.753261	FEN1
Organic cation/anion/zwitterion transport	1/13	0.557364	0.999853	1.28865	0.753261	SLC22A15
PI3K class IB pathway	1/13	0.557364	0.999853	1.28865	0.753261	GNAI1
Purine salvage	1/13	0.557364	0.999853	1.28865	0.753261	ADAL
TACI and BCMA stimulation of B cell immune responses	1/13	0.557364	0.999853	1.28865	0.753261	MAPK14
p27 phosphorylation regulation during cell cycle progression	1/13	0.557364	0.999853	1.28865	0.753261	CKS1B
Platelet homeostasis	5/82	0.562031	0.999853	1.00397	0.578487	TRPC6;PPP2R5E;PLA2G4A;APOB;MAPK14
Potassium channels	6/99	0.562108	0.999853	0.997465	0.574602	KCNH5;KCNK9;KCNJ14;KCNN1;ABCC9;KCNK17
Endocytosis	12/201	0.567233	0.999853	0.981462	0.556474	SH3GLB1;USP8;CAV2;CXCR2;NEDD4L;SNF8;HLA-G;STAM2;MET;RHOA;RAB11A;FGFR2
T cell receptor regulation of apoptosis	36/603	0.568624	0.999853	0.981084	0.553858	AVEN;PSMD12;MAX;UHRF1;CCL4L2;MGST2;GNAI1;HSP90B1;HSPD1;STRN3;LGALS1;ALKBH1;SEC61B;MCTS1;RAB2A;BNIP3L;ARG2;NDFIP1;VBP1;BNIP3;CARD9;PLA2G4A;F2;RHOC;COX6C;HSPE1;MAPK14;RAD23B;HLA-G;ILF3;FABP4;DAD1;ERCC2;VDAC1;EPHA1;CNIH4
Alpha-6 beta-4 integrin signaling pathway	2/31	0.569592	0.999853	1.06638	0.600196	MAPK14;RHOA
Inwardly rectifying potassium channels	2/31	0.569592	0.999853	1.06638	0.600196	KCNJ14;ABCC9
Prostaglandin biosynthesis and regulation	2/31	0.569592	0.999853	1.06638	0.600196	PTGER3;PLA2G4A
Ras family activation regulation	2/31	0.569592	0.999853	1.06638	0.600196	LGALS1;RASGRP4
Stathmin and breast cancer resistance to antimicrotubule agents	2/31	0.569592	0.999853	1.06638	0.600196	RB1CC1;CAMK2A
Cell cycle checkpoints	7/117	0.571792	0.999853	0.983782	0.549915	ORC5;ORC4;PSMD12;PSMB5;PSMD14;RAD1;ANAPC10
Leukocyte transendothelial migration	7/117	0.571792	0.999853	0.983782	0.549915	RAP1B;PLCG1;MAPK14;VCL;RHOA;RAPGEF3;GNAI1
Drug metabolism: cytochrome P450	5/83	0.572954	0.999853	0.991047	0.551963	ALDH3A1;GSTO2;MAOB;MGST3;MGST2
Thyroid-stimulating hormone signaling pathway	4/66	0.57488	0.999853	0.997469	0.552193	RAP1B;GNA12;MAPK14;GNAI1
Amino acid and oligopeptide SLC transporters	3/49	0.578764	0.999853	1.00834	0.551421	SLC43A2;SLC6A14;SLC38A3
Angiopoietin receptor Tie2-mediated signaling	3/49	0.578764	0.999853	1.00834	0.551421	F2;MAPK14;FGF2
Arf6 integrin-mediated signaling pathway	3/49	0.578764	0.999853	1.00834	0.551421	SPAG9;ITGA10;MAPK8IP3
G alpha 12 pathway	3/49	0.578764	0.999853	1.00834	0.551421	F2;MAPK14;RHOA
EGFR1 pathway	9/152	0.58032	0.999853	0.972863	0.529409	RANBP1;CAV2;PPAT;AMD1;MT1F;CCNC;MT1X;MET;VCL
DCC-mediated attractive signaling	1/14	0.584272	0.999853	1.18946	0.639201	TRIO
Glycogen breakdown (glycogenolysis)	1/14	0.584272	0.999853	1.18946	0.639201	PGM1
Glycosphingolipid biosynthesis: globo series	1/14	0.584272	0.999853	1.18946	0.639201	ST3GAL1
Initiation of the second proteolytic cleavage of Notch receptor by receptor-ligand binding	1/14	0.584272	0.999853	1.18946	0.639201	JAG1
Lectin-induced complement pathway	1/14	0.584272	0.999853	1.18946	0.639201	C8A
MAP kinase inactivation of SMRT corepressor	1/14	0.584272	0.999853	1.18946	0.639201	MAPK14
Platelet amyloid precursor protein pathway	1/14	0.584272	0.999853	1.18946	0.639201	F2
Porphyrin metabolism	1/14	0.584272	0.999853	1.18946	0.639201	UROS
Signaling by NOTCH2	1/14	0.584272	0.999853	1.18946	0.639201	JAG1
G1 to S cell cycle control	4/67	0.586919	0.999853	0.981584	0.523055	ORC5;ORC4;CDKN2C;E2F6
Alpha-synuclein signaling	2/32	0.58706	0.999853	1.03078	0.549022	YES1;MAOB
Fibrin clot formation (clotting cascade)	2/32	0.58706	0.999853	1.03078	0.549022	F2;F5
Prothrombin activation intrinsic pathway	2/32	0.58706	0.999853	1.03078	0.549022	F2;F5
NOD signaling pathway	5/85	0.594365	0.999853	0.966167	0.502661	IRAK2;CARD9;SUGT1;MAPK14;HSP90B1
Platelet activation, signaling and aggregation	12/205	0.595014	0.999853	0.960914	0.498877	RAP1B;TRPC6;GNA12;PLA2G4A;CD36;F2;MAPK14;RHOA;RAPGEF3;GNAI1;VCL;F5
MHC class II antigen presentation	6/103	0.601254	0.999853	0.956128	0.486419	DYNC2H1;SEC23A;KIF2A;AP1G1;CTSV;OSBPL1A
Syndecan 2 pathway	2/33	0.603996	0.999853	0.997474	0.502914	CAV2;RHOA
mRNA stability regulation by proteins that bind AU-rich elements	5/86	0.604842	0.999853	0.954188	0.479754	PSMD12;EXOSC4;PSMB5;PSMD14;MAPK14
Malaria	3/51	0.606219	0.999853	0.966223	0.483609	HBB;CD36;MET
Nuclear receptor transcription pathway	3/51	0.606219	0.999853	0.966223	0.483609	ESRRA;RORB;NRBF2
DNA replication	12/207	0.608601	0.999853	0.950956	0.472237	CENPT;ORC5;ORC4;FEN1;PSMD12;PSMB5;KIF2A;PSMD14;PPP2R5E;CDCA8;SSBP1;CENPP
ATR activation in response to replication stress	1/15	0.609545	0.999853	1.10444	0.546744	RAD1
BMP signaling pathway in stem cells	1/15	0.609545	0.999853	1.10444	0.546744	SMAD9
Bile acid and bile salt biosynthesis via 7-alpha-hydroxycholesterol	1/15	0.609545	0.999853	1.10444	0.546744	ACOT8
Coagulation intrinsic pathway	1/15	0.609545	0.999853	1.10444	0.546744	F2
Eicosanoid ligand-binding G-protein coupled receptors	1/15	0.609545	0.999853	1.10444	0.546744	PTGER3
Fibrinolysis pathway	1/15	0.609545	0.999853	1.10444	0.546744	F2
Glycosaminoglycan biosynthesis: keratan sulfate	1/15	0.609545	0.999853	1.10444	0.546744	ST3GAL1
Glycosphingolipid biosynthesis: ganglio series	1/15	0.609545	0.999853	1.10444	0.546744	ST3GAL1
Glycosylation of mammalian N-linked oligosaccarides	1/15	0.609545	0.999853	1.10444	0.546744	FUT6
Lagging strand processive biosynthesis	1/15	0.609545	0.999853	1.10444	0.546744	FEN1
Mu-calpain pathway	1/15	0.609545	0.999853	1.10444	0.546744	RHOA
Repression of pain sensation by the transcriptional regulator DREAM	1/15	0.609545	0.999853	1.10444	0.546744	OPRK1
Spliceosomal assembly	1/15	0.609545	0.999853	1.10444	0.546744	SNRPG
Terpenoid backbone biosynthesis	1/15	0.609545	0.999853	1.10444	0.546744	ACAT1
TrkA receptor signaling pathway	1/15	0.609545	0.999853	1.10444	0.546744	PLCG1
Phase I of biological oxidations: functionalization of compounds	4/69	0.610389	0.999853	0.95128	0.469608	CYP2W1;MAOB;SMOX;CYP4F3
Vitamin B12 metabolism	3/52	0.619491	0.999853	0.946454	0.453216	HBB;F2;APOB
Fibroblast growth factor receptor pathway	6/105	0.6201	0.999853	0.936712	0.44763	RPS6KA5;PLCG1;MAPK14;FGF2;FGF12;FGFR2
Fructose and mannose metabolism	2/34	0.620401	0.999853	0.966251	0.461278	PMM1;PMM2
HIF-2-alpha transcription factor network	2/34	0.620401	0.999853	0.966251	0.461278	EGLN1;TWIST1
N-cadherin signaling events	2/34	0.620401	0.999853	0.966251	0.461278	PLCG1;RHOA
Renal cell carcinoma	4/70	0.621811	0.999853	0.936817	0.4451	RAP1B;EGLN1;FLCN;MET
Signaling events mediated by VEGFR1 and VEGFR2	4/70	0.621811	0.999853	0.936817	0.4451	PLCG1;MAPK14;RHOA;VCL
DNA replication pre-Initiation	5/88	0.625325	0.999853	0.931096	0.437134	ORC5;ORC4;PSMD12;PSMB5;PSMD14
Transmembrane transport of small molecules	25/432	0.62921	0.999853	0.94863	0.439492	GABRB3;GABRB2;SLC43A2;ATP1A3;ATP2C1;SLC2A6;SLC22A15;SLC38A3;ATP9B;SLC34A2;SLC13A3;SLC12A5;ATP6V1G2;SLC2A10;SLC30A2;GABRA4;ABCA4;SLC12A1;SLC6A14;HTR3A;ATP1B3;ABCC9;GABRG2;RAB11A;FXYD2
EGF/EGFR signaling pathway	8/141	0.629867	0.999853	0.929515	0.429665	USP8;RPS6KA5;CAMK2A;REPS2;TWIST1;PLCG1;MAPK14;STAM2
Bacterial invasion of epithelial cells	4/71	0.633019	0.999853	0.922785	0.421948	CAV2;MET;RHOA;VCL
Mitochondrial pathway of apoptosis: multidomain Bcl-2 family	4/71	0.633019	0.999853	0.922785	0.421948	BCL2L13;CAPN2;MFN1;MFN2
Cell-extracellular matrix interactions	1/16	0.633283	0.999853	1.03075	0.470887	FERMT2
DNA-PK pathway in nonhomologous end joining	1/16	0.633283	0.999853	1.03075	0.470887	POLL
Ghrelin biosynthesis, secretion, and deacylation	1/16	0.633283	0.999853	1.03075	0.470887	GCG
GluR2-containing AMPA receptor trafficking	1/16	0.633283	0.999853	1.03075	0.470887	PICK1
Interleukin-10 anti-inflammatory signaling pathway	1/16	0.633283	0.999853	1.03075	0.470887	MAPK14
JNK (c-Jun kinases) phosphorylation and activation mediated by activated human TAK1	1/16	0.633283	0.999853	1.03075	0.470887	IRAK2
KIT signaling regulation	1/16	0.633283	0.999853	1.03075	0.470887	YES1
LPA4-mediated signaling events	1/16	0.633283	0.999853	1.03075	0.470887	RPS6KA5
Other semaphorin interactions	1/16	0.633283	0.999853	1.03075	0.470887	PLXNB3
PI3K subunit p85 role in regulation of actin organization and cell migration	1/16	0.633283	0.999853	1.03075	0.470887	RHOA
Protein kinase A (PKA) at the centrosome	1/16	0.633283	0.999853	1.03075	0.470887	RHOA
Selenium metabolism and selenoproteins	1/16	0.633283	0.999853	1.03075	0.470887	SP3
TGF-beta receptor signaling in EMT (epithelial to mesenchymal transition)	1/16	0.633283	0.999853	1.03075	0.470887	RHOA
Autophagy regulation	2/35	0.636275	0.999853	0.936921	0.423604	ATG3;ATG5
EGF receptor (ErbB1) signaling pathway	2/35	0.636275	0.999853	0.936921	0.423604	PLCG1;GNAI1
fMLP induced chemokine gene expression in HMC-1 cells	2/35	0.636275	0.999853	0.936921	0.423604	PPP3CB;MAPK14
Factors involved in megakaryocyte development and platelet production	7/125	0.641928	0.999853	0.916692	0.40635	KIF9;KIF2A;CAPZA2;MFN1;HBB;MFN2;CABLES2
Myocyte adrenergic pathway	4/72	0.64401	0.999853	0.909166	0.40007	PLA2G4A;MAPK14;RHOD;GNAI1
Binding of chemokines to chemokine receptors	3/54	0.645111	0.999853	0.909241	0.39855	CXCR2;CXCR5;CCR3
Neurotrophin signaling pathway	7/126	0.650211	0.999853	0.90894	0.391261	RAP1B;RPS6KA5;IRAK2;CAMK2A;PLCG1;MAPK14;RHOA
Glycogen metabolism	2/36	0.651624	0.999853	0.909316	0.389448	PPP2R5E;PGM1
PI3K/PLC/TRK pathway	2/36	0.651624	0.999853	0.909316	0.389448	CAMK2A;PLCG1
SNARE interactions in vesicular transport	2/36	0.651624	0.999853	0.909316	0.389448	BNIP1;SEC22B
Signaling to ERKs	2/36	0.651624	0.999853	0.909316	0.389448	PLCG1;MAPK14
Degradation of beta-catenin by the destruction complex	4/73	0.654783	0.999853	0.895942	0.379388	PSMD12;PSMB5;PSMD14;PPP2R5E
Atypical NF-kappaB pathway	1/17	0.655578	0.999853	0.966279	0.407999	MAPK14
Beta-catenin phosphorylation cascade	1/17	0.655578	0.999853	0.966279	0.407999	PPP2R5E
Cell to cell adhesion signaling	1/17	0.655578	0.999853	0.966279	0.407999	VCL
Complement activation, classical pathway	1/17	0.655578	0.999853	0.966279	0.407999	C8A
Endocytotic role of NDK, phosphins and dynamin	1/17	0.655578	0.999853	0.966279	0.407999	PPP3CB
G1/S-specific transcription	1/17	0.655578	0.999853	0.966279	0.407999	DHFR
GRB2-SOS provides linkage to MAPK signaling for integrins	1/17	0.655578	0.999853	0.966279	0.407999	RAP1B
Inflammasomes	1/17	0.655578	0.999853	0.966279	0.407999	SUGT1
Insulin-like growth factor (IGF) activity regulation by insulin-like growth factor binding proteins (IGFBPs)	1/17	0.655578	0.999853	0.966279	0.407999	F2
Nitric oxide metabolism	1/17	0.655578	0.999853	0.966279	0.407999	DHFR
SUMOylation by RanBP2 regulates transcriptional repression	1/17	0.655578	0.999853	0.966279	0.407999	HDAC9
Sulfation biotransformation reaction	1/17	0.655578	0.999853	0.966279	0.407999	SULT4A1
Unblocking of NMDA receptor, glutamate binding and activation	1/17	0.655578	0.999853	0.966279	0.407999	CAMK2A
Zinc transporters	1/17	0.655578	0.999853	0.966279	0.407999	SLC30A2
Calcineurin-dependent NFAT signaling role in lymphocytes	3/55	0.657454	0.999853	0.891708	0.373965	PPP3CB;CHP1;MAPK14
Adherens junction cell adhesion	4/74	0.665334	0.999853	0.883095	0.359832	YES1;MET;RHOA;VCL
E2F transcription factor network	4/74	0.665334	0.999853	0.883095	0.359832	DHFRP1;RANBP1;CDKN2C;E2F6
Wnt/calcium/cyclic GMP pathway	4/74	0.665334	0.999853	0.883095	0.359832	WNT5B;WNT3A;CAMK2A;PLCG1
G alpha (i) signaling events	11/199	0.669924	0.999853	0.903756	0.362037	GNAZ;PENK;PTGER3;CXCR2;CXCR5;OPRK1;S1PR3;AGTR2;DRD2;CCR3;GNAI1
Purine metabolism	9/164	0.670916	0.999853	0.896967	0.35799	ADAL;PNPT1;GPX1;PDE1C;PPAT;ENTPD8;POLR3H;NUDT5;PGM1
Epidermal growth factor receptor (EGFR) pathway	6/111	0.673466	0.999853	0.882902	0.349027	RPS6KA5;PLCG1;RHOC;MAPK14;RHOD;RHOA
Activated AMPK stimulation of fatty-acid oxidation in muscle	1/18	0.67652	0.999853	0.90939	0.355384	ACSL1
CBL signaling regulation	1/18	0.67652	0.999853	0.90939	0.355384	YES1
Effect of METS on macrophage differentiation	1/18	0.67652	0.999853	0.90939	0.355384	ETV3
Human cytomegalovirus and MAP kinase pathways	1/18	0.67652	0.999853	0.90939	0.355384	MAPK14
Nucleotide di- and triphosphate biosynthesis and interconversion	1/18	0.67652	0.999853	0.90939	0.355384	CTPS1
Phosphatidylcholine biosynthesis	1/18	0.67652	0.999853	0.90939	0.355384	CHPT1
Serotonin receptor 4/6/7 and NR3C signaling	1/18	0.67652	0.999853	0.90939	0.355384	RPS6KA5
Sodium/chloride-dependent neurotransmitter transporters	1/18	0.67652	0.999853	0.90939	0.355384	SLC6A14
Cyclin D-associated events in G1	2/38	0.680766	0.999853	0.858707	0.330204	CDKN2C;CKS1B
Signal transduction through IL-1R	2/38	0.680766	0.999853	0.858707	0.330204	IRAK2;MAPK14
Signaling of hepatocyte growth factor receptor	2/38	0.680766	0.999853	0.858707	0.330204	RAP1B;MET
Triglyceride biosynthesis	2/38	0.680766	0.999853	0.858707	0.330204	ACSL1;ACSL4
Cell surface interactions at the vascular wall	5/94	0.682788	0.999853	0.868047	0.331222	YES1;ATP1B3;PLCG1;F2;APOB
Oocyte meiosis	6/113	0.690145	0.999853	0.866306	0.321273	ANAPC13;PPP3CB;PPP2R5E;CAMK2A;CHP1;ANAPC10
RNA polymerase I, RNA polymerase III, and mitochondrial transcription	5/95	0.691763	0.999853	0.858356	0.316314	SNAPC5;SNAPC1;ERCC2;POLR3H;GTF2H2
Angiotensin II-mediated activation of JNK pathway via Pyk2-dependent signaling	2/39	0.694574	0.999853	0.835454	0.304487	PLCG1;MAPK14
E-cadherin nascent AJ-like junctions pathway	2/39	0.694574	0.999853	0.835454	0.304487	RAP1B;RHOA
FRS2-mediated cascade	2/39	0.694574	0.999853	0.835454	0.304487	FGF2;FGFR2
G13 signaling pathway	2/39	0.694574	0.999853	0.835454	0.304487	CFL2;RHOA
Mitochondrial pathway of apoptosis: caspases	4/77	0.695649	0.999853	0.846668	0.307264	CAPN2;NDUFS1;HSPE1;HSPD1
Class C GPCRs (metabotropic glutamate and pheromone receptors)	1/19	0.696189	0.999853	0.858823	0.311009	GRM3
Destabilization of mRNA by butyrate response factor 1 (BRF1)	1/19	0.696189	0.999853	0.858823	0.311009	EXOSC4
Eicosanoid biosynthesis	1/19	0.696189	0.999853	0.858823	0.311009	PNPLA8
FRS2-mediated activation	1/19	0.696189	0.999853	0.858823	0.311009	PLCG1
G-protein-independent seven transmembrane receptor signaling	1/19	0.696189	0.999853	0.858823	0.311009	MAPK14
MAL role in Rho-mediated activation of SRF	1/19	0.696189	0.999853	0.858823	0.311009	RHOA
Platelet calcium homeostasis	1/19	0.696189	0.999853	0.858823	0.311009	TRPC6
Ras activation upon calcium influx through NMDA receptor	1/19	0.696189	0.999853	0.858823	0.311009	CAMK2A
Signaling by FGFR1 fusion mutants	1/19	0.696189	0.999853	0.858823	0.311009	PLCG1
Signaling by NODAL	1/19	0.696189	0.999853	0.858823	0.311009	ACVR1C
Signaling by constitutively active EGFR	1/19	0.696189	0.999853	0.858823	0.311009	PLCG1
M phase pathway	5/96	0.700564	0.999853	0.848878	0.30209	CENPT;KIF2A;PPP2R5E;CDCA8;CENPP
RNA degradation	3/59	0.703703	0.999853	0.827838	0.290901	EXOSC4;PNPT1;HSPD1
Apoptosis regulation	4/78	0.705306	0.999853	0.835182	0.291582	PSMD12;PSMB5;PSMD14;POMP
Negative regulation of FGFR signaling	2/40	0.707883	0.999853	0.813425	0.281019	FGF2;FGFR2
Natural killer cell receptor signaling pathway	3/60	0.71449	0.999853	0.813271	0.273411	TSPO;PLCG1;MAPK14
Selenium pathway	3/60	0.71449	0.999853	0.813271	0.273411	HBB;F2;APOB
4-1BB-dependent immune response	1/20	0.714663	0.999853	0.813578	0.273317	MAPK14
Acute myocardial infarction	1/20	0.714663	0.999853	0.813578	0.273317	F2
Apoptotic signaling in response to DNA damage	1/20	0.714663	0.999853	0.813578	0.273317	EIF2S1
Cell differentiation pathway	1/20	0.714663	0.999853	0.813578	0.273317	MEF2B
Estrogen receptor signaling pathway	1/20	0.714663	0.999853	0.813578	0.273317	MAPK14
GATA3-mediated activation of Th2 cytokine expression	1/20	0.714663	0.999853	0.813578	0.273317	MAPK14
Gene expression regulation in pancreatic beta cells	1/20	0.714663	0.999853	0.813578	0.273317	IAPP
Golgi-associated vesicle biogenesis	1/20	0.714663	0.999853	0.813578	0.273317	AP1G1
Hypertrophy pathway	1/20	0.714663	0.999853	0.813578	0.273317	IFRD1
Interleukin-3 regulation of hematopoietic cells	1/20	0.714663	0.999853	0.813578	0.273317	CCR3
Nerve growth factor (NGF) pathway	1/20	0.714663	0.999853	0.813578	0.273317	PLCG1
RNA polymerase III abortive and retractive initiation	1/20	0.714663	0.999853	0.813578	0.273317	POLR3H
Signaling by Hippo	1/20	0.714663	0.999853	0.813578	0.273317	TJP2
Unfolded protein response	4/79	0.714738	0.999853	0.824002	0.276732	EXOSC4;DNAJB9;EIF2S1;HSP90B1
p73 transcription factor network	4/79	0.714738	0.999853	0.824002	0.276732	HEY2;NEDD4L;MAPK14;GRAMD4
Wnt signaling pathway and pluripotency	5/98	0.717638	0.999853	0.830534	0.275563	WNT5B;CTBP2;WNT3A;PPP2R5E;RHOA
HIV genome transcription	3/61	0.72497	0.999853	0.799206	0.257045	ERCC2;GTF2H2;GTF2E2
Actin cytoskeleton regulation	12/226	0.725515	0.999853	0.86564	0.277761	CFL2;ITGA10;CHRM5;GNA12;ARHGEF4;F2;FGF2;FGF12;RHOA;MYLK3;VCL;FGFR2
Granule cell survival pathway	5/99	0.72591	0.999853	0.821655	0.2632	SMPD2;KCNK9;CXCR2;KCNK17;PLCG1
Senescence and autophagy	5/99	0.72591	0.999853	0.821655	0.2632	SH3GLB1;ATG3;RB1CC1;MAPK14;ATG5
Integrin signaling pathway	8/155	0.73158	0.999853	0.840359	0.262653	RAP1B;CAPN2;PLCG1;RHOC;MAPK14;RHOD;VCL;RHOA
APC/C activator regulation between G1/S and early anaphase	1/21	0.732014	0.999853	0.772858	0.241097	ANAPC10
Biosynthesis of unsaturated fatty acids	1/21	0.732014	0.999853	0.772858	0.241097	ACOX1
Inactivation of APC/C via direct inhibition of the APC/C complex	1/21	0.732014	0.999853	0.772858	0.241097	ANAPC10
p38 MK2 pathway	1/21	0.732014	0.999853	0.772858	0.241097	MAPK14
Amine ligand-binding G-protein coupled receptors	2/42	0.733048	0.999853	0.772671	0.239948	CHRM5;DRD2
BMP receptor signaling	2/42	0.733048	0.999853	0.772671	0.239948	SMAD9;RGMB
Messenger RNA splicing: minor pathway	2/42	0.733048	0.999853	0.772671	0.239948	SNRPG;TXNL4A
Natural killer cell-mediated cytotoxicity	7/137	0.733493	0.999853	0.83154	0.257725	FCGR3A;PPP3CB;FCGR3B;CHP1;PLCG1;ULBP2;HLA-G
Integrin-mediated cell adhesion	5/100	0.734007	0.999853	0.812962	0.251397	RAP1B;CAV2;ITGA10;CAPN2;VCL
Pyrimidine metabolism	5/100	0.734007	0.999853	0.812962	0.251397	PNPT1;TXNRD3;ENTPD8;CTPS1;POLR3H
Shigellosis	3/62	0.735147	0.999853	0.785618	0.241723	MAPK14;VCL;ATG5
Peptide G-protein coupled receptors	10/192	0.73615	0.999853	0.848251	0.259837	PENK;CXCR2;CXCR5;PROK2;TACR3;OPRK1;AGTR2;TRH;F2;CCR3
APC/C-mediated degradation of cell cycle proteins	4/82	0.741697	0.999853	0.792183	0.236716	PSMD12;PSMB5;PSMD14;ANAPC10
ATM-dependent DNA damage response	4/82	0.741697	0.999853	0.792183	0.236716	WNT5B;PPP2R5E;WNT3A;RHOA
GnRH signaling pathway	5/101	0.741929	0.999853	0.804451	0.24013	PLA2G12A;CAMK2A;PLA2G3;PLA2G4A;MAPK14
Melanogenesis	5/101	0.741929	0.999853	0.804451	0.24013	WNT5B;WNT3A;CREB3L2;CAMK2A;GNAI1
Type 1 diabetes mellitus	2/43	0.744924	0.999853	0.753785	0.22197	HLA-G;HSPD1
O-linked glycosylation of mucins	3/63	0.745024	0.999853	0.772483	0.227372	GALNT5;ST3GAL1;GALNT9
Proteasome degradation	3/63	0.745024	0.999853	0.772483	0.227372	PSMD12;PSMB5;HLA-G
Nephrin interactions	1/22	0.748311	0.999853	0.736016	0.213398	KIRREL3
Nitric oxide signaling pathway	1/22	0.748311	0.999853	0.736016	0.213398	PPP3CB
Signaling by ERBB2	5/102	0.749676	0.999853	0.796115	0.229372	USP8;YES1;PDE1C;NRG3;PLCG1
Notch signaling pathway	6/121	0.751094	0.999853	0.805696	0.230611	CDK8;JAG1;CTBP2;HEY2;CCNC;RAB11A
Wnt signaling pathway	12/231	0.752197	0.999853	0.845648	0.240805	VANGL1;SOX3;PPP3CB;CTBP2;WNT5B;WNT3A;PPP2R5E;CAMK2A;CHP1;SOX11;HDAC9;RHOA
Angiotensin II-stimulated signaling through G-proteins and beta-arrestin	3/64	0.754604	0.999853	0.759779	0.213925	PLCG1;MAPK14;RHOA
MAPK cascade role in angiogenesis	3/64	0.754604	0.999853	0.759779	0.213925	PLCG1;F2;MAPK14
Validated nuclear estrogen receptor alpha network	3/64	0.754604	0.999853	0.759779	0.213925	LCOR;NDUFV3;POU4F2
ERBB2/ERBB3 signaling events	2/44	0.756343	0.999853	0.735799	0.205479	USP8;PPP3CB
Gastrin pathway	2/44	0.756343	0.999853	0.735799	0.205479	JAG1;KRT6A
Interactions of HIV Vpr protein with host cellular proteins	2/44	0.756343	0.999853	0.735799	0.205479	RANBP1;SLC25A4
Differentiation pathway in PC12 cells	4/84	0.758566	0.999853	0.772296	0.213405	RAP1B;PLCG1;MAPK14;RAPGEF3
Cyclins and cell cycle regulation	1/23	0.763618	0.999853	0.702524	0.189462	CDKN2C
Deadenylation of mRNA	1/23	0.763618	0.999853	0.702524	0.189462	PAIP1
Downregulation of SMAD2/3-SMAD4 transcriptional activity	1/23	0.763618	0.999853	0.702524	0.189462	NEDD4L
Incretin biosynthesis, secretion, and inactivation	1/23	0.763618	0.999853	0.702524	0.189462	GCG
Interleukin-11 pathway	1/23	0.763618	0.999853	0.702524	0.189462	MET
Post-elongation processing of intronless pre-mRNA	1/23	0.763618	0.999853	0.702524	0.189462	SNRPG
RNA polymerase III transcription termination	1/23	0.763618	0.999853	0.702524	0.189462	POLR3H
Interleukin-12-mediated signaling events	3/65	0.763893	0.999853	0.747485	0.201319	PPP3CB;CCL4L2;MAPK14
Influenza infection	7/142	0.766439	0.999853	0.800527	0.212941	RPL4;RPL37A;RPL9;RPS13;RPL26L1;IPO5;RPL7
Defensins	2/45	0.767318	0.999853	0.718649	0.190337	DEFB126;PRSS2
G alpha (z) signaling events	2/45	0.767318	0.999853	0.718649	0.190337	GNAZ;GNAI1
Interleukin-12/STAT4 pathway	2/45	0.767318	0.999853	0.718649	0.190337	PPP3CB;MAPK14
Destabilization of mRNA by AUF1 (hnRNP D0)	3/66	0.772893	0.999853	0.735581	0.189496	PSMD12;PSMB5;PSMD14
Progesterone-mediated oocyte maturation	4/86	0.774569	0.999853	0.753379	0.192449	ANAPC13;MAPK14;ANAPC10;GNAI1
Transfer RNA aminoacylation	2/46	0.77786	0.999853	0.702278	0.176418	PPA2;YARS2
Cholesterol biosynthesis	1/24	0.777995	0.999853	0.671943	0.168681	TM7SF2
Lysosome vesicle biogenesis	1/24	0.777995	0.999853	0.671943	0.168681	AP1G1
Nicotinate and nicotinamide metabolism	1/24	0.777995	0.999853	0.671943	0.168681	NNT
SREBP signaling	1/24	0.777995	0.999853	0.671943	0.168681	SEC23A
TAK1 activates NF-kappaB by phosphorylation and activation of IKK complex	1/24	0.777995	0.999853	0.671943	0.168681	IRAK2
Triacylglyceride biosynthesis	1/24	0.777995	0.999853	0.671943	0.168681	LPL
Tumor suppressor Arf inhibits ribosomal biogenesis	1/24	0.777995	0.999853	0.671943	0.168681	TWIST1
HIV infection	10/200	0.780078	0.999853	0.812186	0.201715	RANBP1;FEN1;PSMD12;PSMB5;PSMD14;AP1G1;ERCC2;GTF2H2;SLC25A4;GTF2E2
Adipocytokine signaling pathway	3/67	0.781611	0.999853	0.724049	0.178405	ACSL1;ACSL4;CD36
G alpha 13 pathway	3/67	0.781611	0.999853	0.724049	0.178405	ARHGEF19;ARHGEF4;RHOA
Telomerase regulation	3/67	0.781611	0.999853	0.724049	0.178405	MAX;SP3;RAD1
Cell cycle	24/453	0.785213	0.999853	0.862224	0.208486	CENPT;ANAPC13;FEN1;PSMD12;CDKN2C;SYCP2;PSMD14;MAX;CDCA8;ANAPC10;CKS1B;DHFR;ORC5;ORC4;PSMB5;KIF2A;PPP2R5E;CEP250;RAD1;CENPP;CEP76;NINL;E2F6;FKBP6
ABC transporters	2/47	0.787982	0.999853	0.686636	0.163612	ABCA4;ABCC9
Activation of NF-kappaB in B cells	3/68	0.79005	0.999853	0.712871	0.167995	PSMD12;PSMB5;PSMD14
APC/C- and Cdc20-mediated degradation of Nek2A	1/25	0.791498	0.999853	0.643911	0.150565	ANAPC10
Basigin interactions	1/25	0.791498	0.999853	0.643911	0.150565	ATP1B3
C-Myc pathway	1/25	0.791498	0.999853	0.643911	0.150565	MAX
Cellular response to hypoxia	1/25	0.791498	0.999853	0.643911	0.150565	EGLN1
Ck1/Cdk5 regulation by type 1 glutamate receptors	1/25	0.791498	0.999853	0.643911	0.150565	DRD2
DARPP-32 events	1/25	0.791498	0.999853	0.643911	0.150565	PPP3CB
IGF1 receptor signaling through beta-arrestin	1/25	0.791498	0.999853	0.643911	0.150565	MAPK14
Maturity onset diabetes of the young	1/25	0.791498	0.999853	0.643911	0.150565	IAPP
Metal ion solute carrier family (SLC) transporters	1/25	0.791498	0.999853	0.643911	0.150565	SLC30A2
PIP2 hydrolysis	1/25	0.791498	0.999853	0.643911	0.150565	TRPC6
Regulatory RNA pathways	1/25	0.791498	0.999853	0.643911	0.150565	TARBP2
SHC1 events in ERBB2 signaling	1/25	0.791498	0.999853	0.643911	0.150565	NRG3
TPO signaling pathway	1/25	0.791498	0.999853	0.643911	0.150565	PLCG1
Signaling by NGF	11/221	0.792837	0.999853	0.80812	0.187595	SMPD2;LINGO1;TRIO;RPS6KA5;PDE1C;MCF2;ARHGEF4;PLCG1;MAPK14;KALRN;RHOA
HIV factor interactions with host	6/128	0.796859	0.999853	0.759183	0.172394	RANBP1;PSMD12;PSMB5;PSMD14;AP1G1;SLC25A4
HES/HEY pathway	2/48	0.797694	0.999853	0.671673	0.151818	HEY2;TWIST1
Post-translational regulation of adherens junction stability and disassembly	2/48	0.797694	0.999853	0.671673	0.151818	GNA12;MET
TGF-beta signaling pathway	9/185	0.798166	0.999853	0.789052	0.177883	COPS5;CAMK2A;NEDD4L;SMAD9;STRAP;MAPK14;HDAC9;RHOA;UCHL5
ALK1 pathway	1/26	0.80418	0.999853	0.618122	0.134709	SMAD9
Ascorbate and aldarate metabolism	1/26	0.80418	0.999853	0.618122	0.134709	ALDH1B1
Estrogen receptor transcription factor targets	1/26	0.80418	0.999853	0.618122	0.134709	TAF6L
Fibroblast growth factor 1	1/26	0.80418	0.999853	0.618122	0.134709	S1PR3
Glycosaminoglycan biosynthesis: heparan sulfate	1/26	0.80418	0.999853	0.618122	0.134709	HS6ST3
Integrin family cell surface interactions	1/26	0.80418	0.999853	0.618122	0.134709	ITGA10
Interaction between L1-type proteins and ankyrins	1/26	0.80418	0.999853	0.618122	0.134709	SCN3B
Ras signaling pathway	1/26	0.80418	0.999853	0.618122	0.134709	RHOA
Segmentation clock	1/26	0.80418	0.999853	0.618122	0.134709	HEY2
Selective expression of chemokine receptors during T-cell polarization	1/26	0.80418	0.999853	0.618122	0.134709	CCR3
Selenoamino acid metabolism	1/26	0.80418	0.999853	0.618122	0.134709	LCMT2
Steroid biosynthesis	1/26	0.80418	0.999853	0.618122	0.134709	TM7SF2
Termination of O-glycan biosynthesis	1/26	0.80418	0.999853	0.618122	0.134709	ST3GAL1
AP-1 transcription factor network	3/70	0.806115	0.999853	0.691518	0.149042	COPS5;FABP4;PENK
Antiviral mechanism by interferon-stimulated genes	3/70	0.806115	0.999853	0.691518	0.149042	EIF4E3;KPNA4;PLCG1
Complement and coagulation cascades	3/70	0.806115	0.999853	0.691518	0.149042	F2;C8A;F5
Nucleotide metabolism	3/70	0.806115	0.999853	0.691518	0.149042	ADAL;GPX1;PPAT
Ceramide signaling pathway	2/49	0.80701	0.999853	0.657347	0.140948	SMPD2;CRADD
Deadenylation-dependent mRNA decay	2/49	0.80701	0.999853	0.657347	0.140948	EXOSC4;PAIP1
Glycerolipid metabolism	2/49	0.80701	0.999853	0.657347	0.140948	ALDH1B1;LPL
Gastrin-CREB signaling pathway via PKC and MAPK	10/206	0.809409	0.999853	0.787069	0.166426	TRIO;TRPC6;GNRHR2;CHRM5;PROK2;TACR3;GCG;TRH;F2;KALRN
Melanoma	3/71	0.813752	0.999853	0.681312	0.140418	FGF2;MET;FGF12
RIG-I-like receptor signaling pathway	3/71	0.813752	0.999853	0.681312	0.140418	AZI2;MAPK14;ATG5
Non-coding RNA metabolism	2/50	0.815942	0.999853	0.643618	0.130919	SNRPG;GEMIN7
ADP signalling through P2Y purinoceptor 12	1/27	0.816092	0.999853	0.594316	0.120782	GNAI1
Bile acid and bile salt metabolism	1/27	0.816092	0.999853	0.594316	0.120782	ACOT8
EGFR downregulation	1/27	0.816092	0.999853	0.594316	0.120782	STAM2
ERK5 role in neuronal survival pathway	1/27	0.816092	0.999853	0.594316	0.120782	PLCG1
FSH signaling pathway	1/27	0.816092	0.999853	0.594316	0.120782	MAPK14
Glycosphingolipid biosynthesis: lacto and neolacto series	1/27	0.816092	0.999853	0.594316	0.120782	FUT6
Mammalian calpain regulation of cell motility	1/27	0.816092	0.999853	0.594316	0.120782	CAPN2
Proteins and DNA sequences in cardicac structures	1/27	0.816092	0.999853	0.594316	0.120782	JAG1
RNA polymerase III transcription initiation from type 2 promoter	1/27	0.816092	0.999853	0.594316	0.120782	POLR3H
RORA activates circadian expression	1/27	0.816092	0.999853	0.594316	0.120782	NPAS2
Rev-mediated nuclear export of HIV-1 RNA	1/27	0.816092	0.999853	0.594316	0.120782	RANBP1
TWEAK regulation of gene expression	1/27	0.816092	0.999853	0.594316	0.120782	MMP16
VEGFR1 pathway	1/27	0.816092	0.999853	0.594316	0.120782	PLCG1
eIF4E and p70 S6 kinase regulation	1/27	0.816092	0.999853	0.594316	0.120782	MAPK14
Leishmaniasis	3/72	0.821132	0.999853	0.671402	0.132314	FCGR3A;FCGR3B;MAPK14
Extracellular matrix organization	4/93	0.824046	0.999853	0.693864	0.134283	MMP16;COL24A1;PLOD2;PRSS2
Type I interferon (interferon-alpha/beta) pathway	2/51	0.824502	0.999853	0.630449	0.121661	PTP4A1;PTP4A3
Adipogenesis	6/133	0.825376	0.999853	0.729099	0.139926	MEF2B;WNT5B;CISD1;LPL;TWIST1;ZMPSTE24
Membrane trafficking	6/133	0.825376	0.999853	0.729099	0.139926	SEC23A;AP1G1;MYO6;SNF8;STAM2;SNX5
Cell cycle: G1/S checkpoint	1/28	0.827279	0.999853	0.572274	0.108511	DHFR
Extension of telomeres	1/28	0.827279	0.999853	0.572274	0.108511	FEN1
G-protein beta-gamma signalling	1/28	0.827279	0.999853	0.572274	0.108511	RHOA
Nef in HIV-1 replication and disease pathogenesis	1/28	0.827279	0.999853	0.572274	0.108511	AP1G1
PTM: gamma carboxylation, hypusine formation and arylsulfatase activation	1/28	0.827279	0.999853	0.572274	0.108511	F2
Recycling pathway of cell adhesion molecule L1	1/28	0.827279	0.999853	0.572274	0.108511	RPS6KA5
Fc gamma receptor-mediated phagocytosis	4/94	0.830324	0.999853	0.686118	0.127576	FCGR3A;CFL2;PLA2G4A;PLCG1
Hemostasis pathway	24/468	0.832637	0.999853	0.832414	0.152463	TRPC6;YES1;HBB;PLA2G4A;ATP1B3;F2;MAPK14;CABLES2;RHOA;GNAI1;F5;RAP1B;KIF9;KIF2A;PPP2R5E;CAPZA2;GNA12;MFN1;MFN2;PLCG1;CD36;APOB;RAPGEF3;VCL
Signaling events mediated by PTP1B	2/52	0.832703	0.999853	0.617807	0.113107	YES1;RHOA
Integrins in angiogenesis	3/74	0.835145	0.999853	0.652419	0.117533	FGF2;RHOA;VCL
Seven transmembrane receptor signaling through beta-arrestin	3/74	0.835145	0.999853	0.652419	0.117533	PDE1C;MAPK14;RHOA
Metapathway biotransformation	8/174	0.836338	0.999853	0.743414	0.132865	NAA50;CYP2W1;GSTO2;MGST3;CYP4F3;MGST2;SULT4A1;HS6ST3
Class B GPCRs (secretin family receptors)	4/95	0.836415	0.999853	0.678542	0.121209	CALCRL;WNT3A;IAPP;GCG
Amine compound SLC transporters	1/29	0.837786	0.999853	0.551806	0.0976654	SLC6A14
Influence of Ras and Rho proteins on G1 to S transition	1/29	0.837786	0.999853	0.551806	0.0976654	RHOA
Matrix metalloproteinases	1/29	0.837786	0.999853	0.551806	0.0976654	MMP16
RNA polymerase	1/29	0.837786	0.999853	0.551806	0.0976654	POLR3H
Transferrin endocytosis and recycling	1/29	0.837786	0.999853	0.551806	0.0976654	ATP6V1G2
Androgen receptor regulation of biosynthesis and transcription	2/53	0.840556	0.999853	0.605661	0.105199	HOXB13;MAPK14
Starch and sucrose metabolism	2/53	0.840556	0.999853	0.605661	0.105199	MGAM;PGM1
Ubiquitin-mediated proteolysis	6/136	0.840898	0.999853	0.712159	0.123406	ANAPC13;UBE3C;NEDD4L;RNF7;UBE2J2;ANAPC10
Arrhythmogenic right ventricular cardiomyopathy (ARVC)	3/75	0.84179	0.999853	0.643324	0.110796	CACNB2;CACNB3;ITGA10
Diabetes pathways	6/137	0.845817	0.999853	0.706685	0.118336	EXOSC4;DNAJB9;GCG;F2;EIF2S1;HSP90B1
Butanoate metabolism	1/30	0.847655	0.999853	0.53275	0.0880537	ACAT1
Gap junction trafficking and regulation	1/30	0.847655	0.999853	0.53275	0.0880537	MYO6
Heparan sulfate/heparin glycosaminoglycan (HS-GAG) biosynthesis	1/30	0.847655	0.999853	0.53275	0.0880537	HS6ST3
MicroRNAs in muscle cell differentiation	1/30	0.847655	0.999853	0.53275	0.0880537	MEF2B
Nectin adhesion pathway	1/30	0.847655	0.999853	0.53275	0.0880537	RAP1B
PDGFA signaling pathway	1/30	0.847655	0.999853	0.53275	0.0880537	PLCG1
Retinoic acid receptor-mediated signaling	1/30	0.847655	0.999853	0.53275	0.0880537	MAPK14
TNFR1 signaling pathway	1/30	0.847655	0.999853	0.53275	0.0880537	CRADD
Mitochondrial pathway of apoptosis: BH3-only Bcl-2 family	4/97	0.848047	0.999853	0.663879	0.10942	BNIP3L;BNIP3;CAPN2;VDAC1
Kit receptor signaling pathway	2/54	0.848073	0.999853	0.593982	0.0978816	PLCG1;MAPK14
RANKL signaling pathway	2/54	0.848073	0.999853	0.593982	0.0978816	PLCG1;MAPK14
HIV life cycle	5/118	0.850937	0.999853	0.682806	0.110217	RANBP1;FEN1;ERCC2;GTF2H2;GTF2E2
Prolactin regulation of apoptosis	5/118	0.850937	0.999853	0.682806	0.110217	VPS29;SSR3;SSBP1;FBXO32;UQCRH
Oncostatin M	15/311	0.854718	0.999853	0.780785	0.12257	FBN2;GPR37;TNNC1;NEDD4L;LPL;PLA2G4A;RNASE4;HTR3A;CKS1B;LDHA;STEAP1;S100A9;S100A8;KRT6A;MSMB
Basal cell carcinoma	2/55	0.855266	0.999853	0.582744	0.0911078	WNT5B;WNT3A
Meiotic synapsis	2/55	0.855266	0.999853	0.582744	0.0911078	SYCP2;FKBP6
RNA polymerase I transcription	2/55	0.855266	0.999853	0.582744	0.0911078	ERCC2;GTF2H2
TAp63 pathway	2/55	0.855266	0.999853	0.582744	0.0911078	JAG1;TRAF4
p53 signaling pathway	6/139	0.855284	0.999853	0.695983	0.108797	BNIP3L;GPX1;MSH2;SCN3B;MET;POU4F2
Signaling by NOTCH	5/119	0.855946	0.999853	0.67678	0.105272	CDK8;JAG1;HEY2;CCNC;HDAC9
Activated NOTCH1 signaling in the nucleus	1/31	0.856924	0.999853	0.514964	0.0795137	JAG1
Alpha-V beta-3 integrin/OPN pathway	1/31	0.856924	0.999853	0.514964	0.0795137	RHOA
CD28 co-stimulation	1/31	0.856924	0.999853	0.514964	0.0795137	YES1
CD40/CD40L signaling	1/31	0.856924	0.999853	0.514964	0.0795137	MAPK14
DNA strand elongation	1/31	0.856924	0.999853	0.514964	0.0795137	FEN1
Keratan sulfate/keratin metabolism	1/31	0.856924	0.999853	0.514964	0.0795137	ST3GAL1
NF-kappaB activation by non-typeable Hemophilus influenzae	1/31	0.856924	0.999853	0.514964	0.0795137	MAPK14
Cytosolic DNA-sensing pathway	2/56	0.862147	0.999853	0.571921	0.0848331	CCL4L2;POLR3H
Adaptive immune system	31/606	0.863518	0.999853	0.829186	0.121675	ANAPC13;SEC23A;PSMD12;UBE3C;PSMD14;UBA5;NEDD4L;CTSV;UBE2J2;ANAPC10;RAP1B;NPEPPS;FCGR3A;PSMB5;AP1G1;PPP2R5E;SEC61G;PLCG1;CD36;SEC61B;DYNC2H1;YES1;LILRB3;HLA-G;KIF2A;GAN;OSBPL1A;ULBP2;RAPGEF3;TRIM11;RNF220
Dilated cardiomyopathy	4/100	0.86418	0.999853	0.643029	0.0938659	CACNB2;CACNB3;ITGA10;TNNC1
Glycine, serine and threonine metabolism	1/32	0.865629	0.999853	0.498326	0.0719078	MAOB
Hypothetical network for drug addiction	1/32	0.865629	0.999853	0.498326	0.0719078	DRD2
Pancreatic beta-cell development regulation	1/32	0.865629	0.999853	0.498326	0.0719078	IAPP
Signaling by Robo receptor	1/32	0.865629	0.999853	0.498326	0.0719078	ARHGAP39
Mechanism of gene regulation by peroxisome proliferators via PPAR-alpha	2/57	0.868726	0.999853	0.561493	0.0790172	ACOX1;LPL
PI3K cascade	2/57	0.868726	0.999853	0.561493	0.0790172	FGF2;FGFR2
SHP2 signaling	2/57	0.868726	0.999853	0.561493	0.0790172	RHOA;GNAI1
RNA polymerase II transcription	4/101	0.869221	0.999853	0.636366	0.0891917	ERCC2;SNRPG;GTF2H2;GTF2E2
Apoptosis modulation and signaling	3/80	0.871636	0.999853	0.601389	0.0826207	CRADD;PTRH2;BNIP3
GPCR ligand binding	20/410	0.872872	0.999853	0.7894	0.107332	CALCRL;GNRHR2;WNT3A;CHRM5;PTGER3;CXCR5;TACR3;OPRK1;GCG;TRH;F2;GRM3;PENK;CXCR2;PROK2;IAPP;S1PR3;AGTR2;DRD2;CCR3
Glucagon signaling in metabolic regulation	1/33	0.873805	0.999853	0.482728	0.0651189	GCG
Glucagon-type ligand receptors	1/33	0.873805	0.999853	0.482728	0.0651189	GCG
Glycoprotein VI-mediated activation cascade	1/33	0.873805	0.999853	0.482728	0.0651189	RHOA
Negative regulators of RIG-I/MDA5 signaling	1/33	0.873805	0.999853	0.482728	0.0651189	ATG5
[truncated: 199 more rows]

## Sheet: KEGG
Term	Overlap	P-value	Adjusted P-value	Odds Ratio	Combined Score	Genes
[truncated: 296 more rows]

[truncated: 3 more sheets: GO Biolocical Processes, GO Cellular Compartments, GO Molecular Function]
